# Supplementary material
Source: PubMed Central journal article supplement (PMC4213634)
Supplement: rspb20141304supp1.pdf [file rspb20141304supp1.pdf]

T06 juvenile, undetermined sex, weight: 377g

T07 juvenile, undetermined sex, weight: 377g

| T06 soil temp (250 mm) time | T06 soil temp 250 mm | T06 Tb time       | T06 Tb | T07 soil temp (250 mm) time | T07 soil temp 250 mm |
|-----------------------------|----------------------|-------------------|--------|-----------------------------|----------------------|
| 3/5/2010 18:51:01           | 25.859               | 3/3/2010 13:04:00 | 30.5   | 3/6/2010 16:49:01           | 26.324               |
| 3/5/2010 19:11:01           | 25.859               | 3/3/2010 13:39:00 | 30.5   | 3/6/2010 17:09:01           | 26.199               |
| 3/5/2010 19:31:01           | 25.859               | 3/3/2010 14:14:00 | 30.5   | 3/6/2010 17:29:01           | 26.199               |
| 3/5/2010 19:51:01           | 25.859               | 3/3/2010 14:49:00 | 30.5   | 3/6/2010 17:49:01           | 26.137               |
| 3/5/2010 20:11:01           | 25.859               | 3/3/2010 15:24:00 | 30.5   | 3/6/2010 18:09:01           | 26.137               |
| 3/5/2010 20:31:01           | 25.859               | 3/3/2010 15:59:00 | 30.5   | 3/6/2010 18:29:01           | 26.137               |
| 3/5/2010 20:51:01           | 25.859               | 3/3/2010 16:34:00 | 31.0   | 3/6/2010 18:49:01           | 26.137               |
| 3/5/2010 21:11:01           | 25.859               | 3/3/2010 17:09:00 | 31.0   | 3/6/2010 19:09:01           | 26.137               |
| 3/5/2010 21:31:01           | 25.859               | 3/3/2010 17:44:00 | 32.0   | 3/6/2010 19:29:01           | 26.137               |
| 3/5/2010 21:51:01           | 25.859               | 3/3/2010 18:19:00 | 32.5   | 3/6/2010 19:49:01           | 26.199               |
| 3/5/2010 22:11:01           | 25.859               | 3/3/2010 18:54:00 | 33.5   | 3/6/2010 20:09:01           | 26.199               |
| 3/5/2010 22:31:01           | 25.859               | 3/3/2010 19:29:00 | 33.5   | 3/6/2010 20:29:01           | 26.199               |
| 3/5/2010 22:51:01           | 25.859               | 3/3/2010 20:04:00 | 33.5   | 3/6/2010 20:49:01           | 26.199               |
| 3/5/2010 23:11:01           | 25.859               | 3/3/2010 20:39:00 | 34.0   | 3/6/2010 21:09:01           | 26.199               |
| 3/5/2010 23:31:01           | 25.859               | 3/3/2010 21:14:00 | 33.5   | 3/6/2010 21:29:01           | 26.199               |
| 3/5/2010 23:51:01           | 25.859               | 3/3/2010 21:49:00 | 33.0   | 3/6/2010 21:49:01           | 26.199               |
| 3/6/2010 00:11:01           | 25.859               | 3/3/2010 22:24:00 | 33.5   | 3/6/2010 22:09:01           | 26.199               |
| 3/6/2010 00:31:01           | 25.859               | 3/3/2010 22:59:00 | 34.0   | 3/6/2010 22:29:01           | 26.262               |
| 3/6/2010 00:51:01           | 25.859               | 3/3/2010 23:34:00 | 34.0   | 3/6/2010 22:49:01           | 26.262               |
| 3/6/2010 01:11:01           | 25.859               | 3/4/2010 00:09:00 | 34.0   | 3/6/2010 23:09:01           | 26.262               |
| 3/6/2010 01:31:01           | 25.859               | 3/4/2010 00:44:00 | 33.0   | 3/6/2010 23:29:01           | 26.262               |
| 3/6/2010 01:51:01           | 25.859               | 3/4/2010 01:19:00 | 32.0   | 3/6/2010 23:49:01           | 26.262               |
| 3/6/2010 02:11:01           | 25.922               | 3/4/2010 01:54:00 | 31.5   | 3/7/2010 00:09:01           | 26.262               |
| 3/6/2010 02:31:01           | 25.859               | 3/4/2010 02:29:00 | 31.0   | 3/7/2010 00:29:01           | 26.262               |
| 3/6/2010 02:51:01           | 25.859               | 3/4/2010 03:04:00 | 32.0   | 3/7/2010 00:49:01           | 26.262               |
| 3/6/2010 03:11:01           | 25.922               | 3/4/2010 03:39:00 | 32.0   | 3/7/2010 01:09:01           | 26.262               |
| 3/6/2010 03:31:01           | 25.922               | 3/4/2010 04:14:00 | 31.5   | 3/7/2010 01:29:01           | 26.262               |
| 3/6/2010 03:51:01           | 25.922               | 3/4/2010 04:49:00 | 30.5   | 3/7/2010 01:49:01           | 26.262               |
| 3/6/2010 04:11:01           | 25.922               | 3/4/2010 05:24:00 | 30.5   | 3/7/2010 02:09:01           | 26.262               |
| 3/6/2010 04:31:01           | 25.922               | 3/4/2010 05:59:00 | 30.0   | 3/7/2010 02:29:01           | 26.262               |
| 3/6/2010 04:51:01           | 25.922               | 3/4/2010 06:34:00 | 30.0   | 3/7/2010 02:49:01           | 26.262               |
| 3/6/2010 05:11:01           | 25.922               | 3/4/2010 07:09:00 | 30.0   | 3/7/2010 03:09:01           | 26.262               |
| 3/6/2010 05:31:01           | 25.922               | 3/4/2010 07:44:00 | 30.0   | 3/7/2010 03:29:01           | 26.262               |
| 3/6/2010 05:51:01           | 25.922               | 3/4/2010 08:19:00 | 29.5   | 3/7/2010 03:49:01           | 26.262               |
| 3/6/2010 06:11:01           | 25.922               | 3/4/2010 08:54:00 | 29.0   | 3/7/2010 04:09:01           | 26.262               |
| 3/6/2010 06:31:01           | 25.922               | 3/4/2010 09:29:00 | 29.0   | 3/7/2010 04:29:01           | 26.262               |
| 3/6/2010 06:51:01           | 25.922               | 3/4/2010 10:04:00 | 29.0   | 3/7/2010 04:49:01           | 26.262               |
| 3/6/2010 07:11:01           | 25.859               | 3/4/2010 10:39:00 | 29.0   | 3/7/2010 05:09:01           | 26.262               |
| 3/6/2010 07:31:01           | 25.859               | 3/4/2010 11:14:00 | 28.5   | 3/7/2010 05:29:01           | 26.262               |
| 3/6/2010 07:51:01           | 25.859               | 3/4/2010 11:49:00 | 28.5   | 3/7/2010 05:49:01           | 26.262               |
| 3/6/2010 08:11:01           | 25.859               | 3/4/2010 12:24:00 | 28.5   | 3/7/2010 06:09:01           | 26.262               |
| 3/6/2010 08:31:01           | 25.859               | 3/4/2010 12:59:00 | 28.5   | 3/7/2010 06:29:01           | 26.262               |
| 3/6/2010 08:51:01           | 25.859               | 3/4/2010 13:34:00 | 28.5   | 3/7/2010 06:49:01           | 26.262               |
| 3/6/2010 09:11:01           | 25.859               | 3/4/2010 14:09:00 | 29.0   | 3/7/2010 07:09:01           | 26.262               |
| 3/6/2010 09:31:01           | 25.859               | 3/4/2010 14:44:00 | 29.5   | 3/7/2010 07:29:01           | 26.262               |

|                   |        |                   |      |                   |        |
|-------------------|--------|-------------------|------|-------------------|--------|
| 3/6/2010 09:51:01 | 25.859 | 3/4/2010 15:19:00 | 29.5 | 3/7/2010 07:49:01 | 26.262 |
| 3/6/2010 10:11:01 | 25.859 | 3/4/2010 15:54:00 | 30.0 | 3/7/2010 08:09:01 | 26.262 |
| 3/6/2010 10:31:01 | 25.859 | 3/4/2010 16:29:00 | 30.0 | 3/7/2010 08:29:01 | 26.199 |
| 3/6/2010 10:51:01 | 25.859 | 3/4/2010 17:04:00 | 30.0 | 3/7/2010 08:49:01 | 26.199 |
| 3/6/2010 11:11:01 | 25.859 | 3/4/2010 17:39:00 | 30.0 | 3/7/2010 09:09:01 | 26.199 |
| 3/6/2010 11:31:01 | 25.859 | 3/4/2010 18:14:00 | 30.0 | 3/7/2010 09:29:01 | 26.199 |
| 3/6/2010 11:51:01 | 25.859 | 3/4/2010 18:49:00 | 29.5 | 3/7/2010 09:49:01 | 26.199 |
| 3/6/2010 12:11:01 | 25.859 | 3/4/2010 19:24:00 | 29.5 | 3/7/2010 10:09:01 | 26.199 |
| 3/6/2010 12:31:01 | 25.859 | 3/4/2010 19:59:00 | 29.0 | 3/7/2010 10:29:01 | 26.199 |
| 3/6/2010 12:51:01 | 25.859 | 3/4/2010 20:34:00 | 29.0 | 3/7/2010 10:49:01 | 26.137 |
| 3/6/2010 13:11:01 | 25.859 | 3/4/2010 21:09:00 | 29.5 | 3/7/2010 11:09:01 | 26.137 |
| 3/6/2010 13:31:01 | 25.859 | 3/4/2010 21:44:00 | 29.0 | 3/7/2010 11:29:01 | 26.137 |
| 3/6/2010 13:51:01 | 25.797 | 3/4/2010 22:19:00 | 29.0 | 3/7/2010 11:49:01 | 26.137 |
| 3/6/2010 14:11:01 | 25.859 | 3/4/2010 22:54:00 | 29.0 | 3/7/2010 12:09:01 | 26.137 |
| 3/6/2010 14:31:01 | 25.797 | 3/4/2010 23:29:00 | 28.5 | 3/7/2010 12:29:01 | 26.137 |
| 3/6/2010 14:51:01 | 25.797 | 3/5/2010 00:04:00 | 28.5 | 3/7/2010 12:49:01 | 26.137 |
| 3/6/2010 15:11:01 | 25.797 | 3/5/2010 00:39:00 | 28.5 | 3/7/2010 13:09:01 | 26.074 |
| 3/6/2010 15:31:01 | 25.797 | 3/5/2010 01:14:00 | 28.5 | 3/7/2010 13:29:01 | 26.074 |
| 3/6/2010 15:51:01 | 25.797 | 3/5/2010 01:49:00 | 29.0 | 3/7/2010 13:49:01 | 26.074 |
| 3/6/2010 16:11:01 | 25.797 | 3/5/2010 02:24:00 | 29.0 | 3/7/2010 14:09:01 | 26.074 |
| 3/6/2010 16:31:01 | 25.797 | 3/5/2010 02:59:00 | 29.0 | 3/7/2010 14:29:01 | 26.074 |
| 3/6/2010 16:51:01 | 25.797 | 3/5/2010 03:34:00 | 29.0 | 3/7/2010 14:49:01 | 26.074 |
| 3/6/2010 17:11:01 | 25.797 | 3/5/2010 04:09:00 | 28.5 | 3/7/2010 15:09:01 | 26.074 |
| 3/6/2010 17:31:01 | 25.797 | 3/5/2010 04:44:00 | 28.5 | 3/7/2010 15:29:01 | 26.074 |
| 3/6/2010 17:51:01 | 25.797 | 3/5/2010 05:19:00 | 28.5 | 3/7/2010 15:49:01 | 26.074 |
| 3/6/2010 18:11:01 | 25.797 | 3/5/2010 05:54:00 | 28.0 | 3/7/2010 16:09:01 | 26.074 |
| 3/6/2010 18:31:01 | 25.797 | 3/5/2010 06:29:00 | 28.0 | 3/7/2010 16:29:01 | 26.074 |
| 3/6/2010 18:51:01 | 25.797 | 3/5/2010 07:04:00 | 28.5 | 3/7/2010 16:49:01 | 26.074 |
| 3/6/2010 19:11:01 | 25.797 | 3/5/2010 07:39:00 | 29.0 | 3/7/2010 17:09:01 | 26.012 |
| 3/6/2010 19:31:01 | 25.859 | 3/5/2010 08:14:00 | 29.0 | 3/7/2010 17:29:01 | 26.012 |
| 3/6/2010 19:51:01 | 25.859 | 3/5/2010 08:49:00 | 28.5 | 3/7/2010 17:49:01 | 26.012 |
| 3/6/2010 20:11:01 | 25.859 | 3/5/2010 09:24:00 | 28.5 | 3/7/2010 18:09:01 | 26.012 |
| 3/6/2010 20:31:01 | 25.859 | 3/5/2010 09:59:00 | 28.5 | 3/7/2010 18:29:01 | 26.012 |
| 3/6/2010 20:51:01 | 25.859 | 3/5/2010 10:34:00 | 28.5 | 3/7/2010 18:49:01 | 26.012 |
| 3/6/2010 21:11:01 | 25.859 | 3/5/2010 11:09:00 | 28.0 | 3/7/2010 19:09:01 | 26.012 |
| 3/6/2010 21:31:01 | 25.859 | 3/5/2010 11:44:00 | 28.5 | 3/7/2010 19:29:01 | 26.012 |
| 3/6/2010 21:51:01 | 25.859 | 3/5/2010 12:19:00 | 28.0 | 3/7/2010 19:49:01 | 26.012 |
| 3/6/2010 22:11:01 | 25.859 | 3/5/2010 12:54:00 | 28.0 | 3/7/2010 20:09:01 | 26.012 |
| 3/6/2010 22:31:01 | 25.859 | 3/5/2010 13:29:00 | 28.0 | 3/7/2010 20:29:01 | 26.012 |
| 3/6/2010 22:51:01 | 25.859 | 3/5/2010 14:04:00 | 28.0 | 3/7/2010 20:49:01 | 26.012 |
| 3/6/2010 23:11:01 | 25.859 | 3/5/2010 14:39:00 | 28.0 | 3/7/2010 21:09:01 | 26.012 |
| 3/6/2010 23:31:01 | 25.859 | 3/5/2010 15:14:00 | 28.5 | 3/7/2010 21:29:01 | 26.012 |
| 3/6/2010 23:51:01 | 25.859 | 3/5/2010 15:49:00 | 28.5 | 3/7/2010 21:49:01 | 26.012 |
| 3/7/2010 00:11:01 | 25.859 | 3/5/2010 16:24:00 | 28.5 | 3/7/2010 22:09:01 | 26.012 |
| 3/7/2010 00:31:01 | 25.859 | 3/5/2010 16:59:00 | 28.5 | 3/7/2010 22:29:01 | 26.012 |
| 3/7/2010 00:51:01 | 25.859 | 3/5/2010 17:34:00 | 28.5 | 3/7/2010 22:49:01 | 26.012 |
| 3/7/2010 01:11:01 | 25.922 | 3/5/2010 18:09:00 | 28.5 | 3/7/2010 23:09:01 | 26.012 |
| 3/7/2010 01:31:01 | 25.922 | 3/5/2010 18:44:00 | 28.5 | 3/7/2010 23:29:01 | 26.012 |
| 3/7/2010 01:51:01 | 25.922 | 3/5/2010 19:19:00 | 28.5 | 3/7/2010 23:49:01 | 26.012 |
| 3/7/2010 02:11:01 | 25.922 | 3/5/2010 19:54:00 | 29.5 | 3/8/2010 00:09:01 | 26.012 |

|                   |        |                   |      |                   |        |
|-------------------|--------|-------------------|------|-------------------|--------|
| 3/7/2010 02:31:01 | 25.922 | 3/5/2010 20:29:00 | 30.5 | 3/8/2010 00:29:01 | 26.012 |
| 3/7/2010 02:51:01 | 25.922 | 3/5/2010 21:04:00 | 31.0 | 3/8/2010 00:49:01 | 26.012 |
| 3/7/2010 03:11:01 | 25.922 | 3/5/2010 21:39:00 | 31.0 | 3/8/2010 01:09:01 | 26.012 |
| 3/7/2010 03:31:01 | 25.922 | 3/5/2010 22:14:00 | 31.0 | 3/8/2010 01:29:01 | 26.012 |
| 3/7/2010 03:51:01 | 25.922 | 3/5/2010 22:49:00 | 30.5 | 3/8/2010 01:49:01 | 26.012 |
| 3/7/2010 04:11:01 | 25.922 | 3/5/2010 23:24:00 | 30.0 | 3/8/2010 02:09:01 | 26.012 |
| 3/7/2010 04:31:01 | 25.922 | 3/5/2010 23:59:00 | 29.5 | 3/8/2010 02:29:01 | 26.012 |
| 3/7/2010 04:51:01 | 25.922 | 3/6/2010 00:34:00 | 29.5 | 3/8/2010 02:49:01 | 26.012 |
| 3/7/2010 05:11:01 | 25.922 | 3/6/2010 01:09:00 | 29.0 | 3/8/2010 03:09:01 | 26.012 |
| 3/7/2010 05:31:01 | 25.922 | 3/6/2010 01:44:00 | 29.0 | 3/8/2010 03:29:01 | 26.012 |
| 3/7/2010 05:51:01 | 25.922 | 3/6/2010 02:19:00 | 29.0 | 3/8/2010 03:49:01 | 26.012 |
| 3/7/2010 06:11:01 | 25.922 | 3/6/2010 02:54:00 | 28.5 | 3/8/2010 04:09:01 | 26.012 |
| 3/7/2010 06:31:01 | 25.922 | 3/6/2010 03:29:00 | 28.5 | 3/8/2010 04:29:01 | 26.012 |
| 3/7/2010 06:51:01 | 25.922 | 3/6/2010 04:04:00 | 28.5 | 3/8/2010 04:49:01 | 26.012 |
| 3/7/2010 07:11:01 | 25.922 | 3/6/2010 04:39:00 | 28.5 | 3/8/2010 05:09:01 | 26.012 |
| 3/7/2010 07:31:01 | 25.922 | 3/6/2010 05:14:00 | 28.0 | 3/8/2010 05:29:01 | 26.012 |
| 3/7/2010 07:51:01 | 25.922 | 3/6/2010 05:49:00 | 28.0 | 3/8/2010 05:49:01 | 26.012 |
| 3/7/2010 08:11:01 | 25.922 | 3/6/2010 06:24:00 | 28.0 | 3/8/2010 06:09:01 | 26.012 |
| 3/7/2010 08:31:01 | 25.922 | 3/6/2010 06:59:00 | 28.0 | 3/8/2010 06:29:01 | 26.012 |
| 3/7/2010 08:51:01 | 25.922 | 3/6/2010 07:34:00 | 28.0 | 3/8/2010 06:49:01 | 26.012 |
| 3/7/2010 09:11:01 | 25.922 | 3/6/2010 08:09:00 | 28.0 | 3/8/2010 07:09:01 | 26.012 |
| 3/7/2010 09:31:01 | 25.922 | 3/6/2010 08:44:00 | 28.0 | 3/8/2010 07:29:01 | 26.012 |
| 3/7/2010 09:51:01 | 25.922 | 3/6/2010 09:19:00 | 28.0 | 3/8/2010 07:49:01 | 26.012 |
| 3/7/2010 10:11:01 | 25.922 | 3/6/2010 09:54:00 | 28.0 | 3/8/2010 08:09:01 | 26.012 |
| 3/7/2010 10:31:01 | 25.922 | 3/6/2010 10:29:00 | 28.0 | 3/8/2010 08:29:01 | 26.012 |
| 3/7/2010 10:51:01 | 25.922 | 3/6/2010 11:04:00 | 28.0 | 3/8/2010 08:49:01 | 26.012 |
| 3/7/2010 11:11:01 | 25.922 | 3/6/2010 11:39:00 | 28.0 | 3/8/2010 09:09:01 | 25.949 |
| 3/7/2010 11:31:01 | 25.922 | 3/6/2010 12:14:00 | 28.0 | 3/8/2010 09:29:01 | 25.949 |
| 3/7/2010 11:51:01 | 25.859 | 3/6/2010 12:49:00 | 28.0 | 3/8/2010 09:49:01 | 25.949 |
| 3/7/2010 12:11:01 | 25.859 | 3/6/2010 13:24:00 | 28.0 | 3/8/2010 10:09:01 | 25.949 |
| 3/7/2010 12:31:01 | 25.859 | 3/6/2010 13:59:00 | 28.0 | 3/8/2010 10:29:01 | 25.949 |
| 3/7/2010 12:51:01 | 25.859 | 3/6/2010 14:34:00 | 28.0 | 3/8/2010 10:49:01 | 25.949 |
| 3/7/2010 13:11:01 | 25.859 | 3/6/2010 15:09:00 | 28.0 | 3/8/2010 11:09:01 | 25.949 |
| 3/7/2010 13:31:01 | 25.859 | 3/6/2010 15:44:00 | 28.0 | 3/8/2010 11:29:01 | 25.949 |
| 3/7/2010 13:51:01 | 25.859 | 3/6/2010 16:19:00 | 28.0 | 3/8/2010 11:49:01 | 25.949 |
| 3/7/2010 14:11:01 | 25.859 | 3/6/2010 16:54:00 | 28.0 | 3/8/2010 12:09:01 | 25.949 |
| 3/7/2010 14:31:01 | 25.859 | 3/6/2010 17:29:00 | 28.0 | 3/8/2010 12:29:01 | 25.949 |
| 3/7/2010 14:51:01 | 25.859 | 3/6/2010 18:04:00 | 28.0 | 3/8/2010 12:49:01 | 25.949 |
| 3/7/2010 15:11:01 | 25.859 | 3/6/2010 18:39:00 | 28.0 | 3/8/2010 13:09:01 | 25.949 |
| 3/7/2010 15:31:01 | 25.859 | 3/6/2010 19:14:00 | 28.0 | 3/8/2010 13:29:01 | 25.949 |
| 3/7/2010 15:51:01 | 25.859 | 3/6/2010 19:49:00 | 28.0 | 3/8/2010 13:49:01 | 25.949 |
| 3/7/2010 16:11:01 | 25.797 | 3/6/2010 20:24:00 | 28.5 | 3/8/2010 14:09:01 | 25.949 |
| 3/7/2010 16:31:01 | 25.797 | 3/6/2010 20:59:00 | 28.5 | 3/8/2010 14:29:01 | 25.949 |
| 3/7/2010 16:51:01 | 25.797 | 3/6/2010 21:34:00 | 28.0 | 3/8/2010 14:49:01 | 25.949 |
| 3/7/2010 17:11:01 | 25.797 | 3/6/2010 22:09:00 | 28.0 | 3/8/2010 15:09:01 | 25.949 |
| 3/7/2010 17:31:01 | 25.797 | 3/6/2010 22:44:00 | 28.0 | 3/8/2010 15:29:01 | 25.949 |
| 3/7/2010 17:51:01 | 25.797 | 3/6/2010 23:19:00 | 28.5 | 3/8/2010 15:49:01 | 25.949 |
| 3/7/2010 18:11:01 | 25.797 | 3/6/2010 23:54:00 | 28.0 | 3/8/2010 16:09:01 | 25.949 |
| 3/7/2010 18:31:01 | 25.797 | 3/7/2010 00:29:00 | 28.0 | 3/8/2010 16:29:01 | 25.949 |
| 3/7/2010 18:51:01 | 25.797 | 3/7/2010 01:04:00 | 28.0 | 3/8/2010 16:49:01 | 25.949 |

|                   |        |                   |      |                   |        |
|-------------------|--------|-------------------|------|-------------------|--------|
| 3/7/2010 19:11:01 | 25.797 | 3/7/2010 01:39:00 | 28.0 | 3/8/2010 17:09:01 | 25.949 |
| 3/7/2010 19:31:01 | 25.797 | 3/7/2010 02:14:00 | 28.0 | 3/8/2010 17:29:01 | 25.949 |
| 3/7/2010 19:51:01 | 25.797 | 3/7/2010 02:49:00 | 28.0 | 3/8/2010 17:49:01 | 25.949 |
| 3/7/2010 20:11:01 | 25.797 | 3/7/2010 03:24:00 | 28.0 | 3/8/2010 18:09:01 | 25.949 |
| 3/7/2010 20:31:01 | 25.797 | 3/7/2010 03:59:00 | 28.0 | 3/8/2010 18:29:01 | 26.012 |
| 3/7/2010 20:51:01 | 25.797 | 3/7/2010 04:34:00 | 28.0 | 3/8/2010 18:49:01 | 26.012 |
| 3/7/2010 21:11:01 | 25.797 | 3/7/2010 05:09:00 | 28.0 | 3/8/2010 19:09:01 | 26.012 |
| 3/7/2010 21:31:01 | 25.797 | 3/7/2010 05:44:00 | 28.0 | 3/8/2010 19:29:01 | 26.012 |
| 3/7/2010 21:51:01 | 25.797 | 3/7/2010 06:19:00 | 28.0 | 3/8/2010 19:49:01 | 26.012 |
| 3/7/2010 22:11:01 | 25.797 | 3/7/2010 06:54:00 | 27.5 | 3/8/2010 20:09:01 | 26.012 |
| 3/7/2010 22:31:01 | 25.797 | 3/7/2010 07:29:00 | 27.5 | 3/8/2010 20:29:01 | 26.012 |
| 3/7/2010 22:51:01 | 25.797 | 3/7/2010 08:04:00 | 27.5 | 3/8/2010 20:49:01 | 26.012 |
| 3/7/2010 23:11:01 | 25.797 | 3/7/2010 08:39:00 | 27.5 | 3/8/2010 21:09:01 | 26.012 |
| 3/7/2010 23:31:01 | 25.797 | 3/7/2010 09:14:00 | 27.5 | 3/8/2010 21:29:01 | 26.012 |
| 3/7/2010 23:51:01 | 25.797 | 3/7/2010 09:49:00 | 27.5 | 3/8/2010 21:49:01 | 26.012 |
| 3/8/2010 00:11:01 | 25.797 | 3/7/2010 10:24:00 | 27.5 | 3/8/2010 22:09:01 | 26.012 |
| 3/8/2010 00:31:01 | 25.797 | 3/7/2010 10:59:00 | 27.5 | 3/8/2010 22:29:01 | 26.012 |
| 3/8/2010 00:51:01 | 25.797 | 3/7/2010 11:34:00 | 27.5 | 3/8/2010 22:49:01 | 26.012 |
| 3/8/2010 01:11:01 | 25.797 | 3/7/2010 12:09:00 | 27.5 | 3/8/2010 23:09:01 | 26.012 |
| 3/8/2010 01:31:01 | 25.797 | 3/7/2010 12:44:00 | 27.5 | 3/8/2010 23:29:01 | 26.012 |
| 3/8/2010 01:51:01 | 25.797 | 3/7/2010 13:19:00 | 27.5 | 3/8/2010 23:49:01 | 26.012 |
| 3/8/2010 02:11:01 | 25.797 | 3/7/2010 13:54:00 | 27.5 | 3/9/2010 00:09:01 | 26.012 |
| 3/8/2010 02:31:01 | 25.797 | 3/7/2010 14:29:00 | 28.0 | 3/9/2010 00:29:01 | 26.074 |
| 3/8/2010 02:51:01 | 25.797 | 3/7/2010 15:04:00 | 28.5 | 3/9/2010 00:49:01 | 26.074 |
| 3/8/2010 03:11:01 | 25.797 | 3/7/2010 15:39:00 | 28.5 | 3/9/2010 01:09:01 | 26.012 |
| 3/8/2010 03:31:01 | 25.797 | 3/7/2010 16:14:00 | 28.5 | 3/9/2010 01:29:01 | 26.012 |
| 3/8/2010 03:51:01 | 25.797 | 3/7/2010 16:49:00 | 28.0 | 3/9/2010 01:49:01 | 26.074 |
| 3/8/2010 04:11:01 | 25.797 | 3/7/2010 17:24:00 | 28.0 | 3/9/2010 02:09:01 | 26.012 |
| 3/8/2010 04:31:01 | 25.797 | 3/7/2010 17:59:00 | 28.0 | 3/9/2010 02:29:01 | 26.074 |
| 3/8/2010 04:51:01 | 25.797 | 3/7/2010 18:34:00 | 27.5 | 3/9/2010 02:49:01 | 26.012 |
| 3/8/2010 05:11:01 | 25.797 | 3/7/2010 19:09:00 | 27.5 | 3/9/2010 03:09:01 | 26.012 |
| 3/8/2010 05:31:01 | 25.797 | 3/7/2010 19:44:00 | 27.5 | 3/9/2010 03:29:01 | 26.012 |
| 3/8/2010 05:51:01 | 25.797 | 3/7/2010 20:19:00 | 27.5 | 3/9/2010 03:49:01 | 26.012 |
| 3/8/2010 06:11:01 | 25.797 | 3/7/2010 20:54:00 | 27.5 | 3/9/2010 04:09:01 | 26.012 |
| 3/8/2010 06:31:01 | 25.797 | 3/7/2010 21:29:00 | 27.5 | 3/9/2010 04:29:01 | 26.012 |
| 3/8/2010 06:51:01 | 25.797 | 3/7/2010 22:04:00 | 27.5 | 3/9/2010 04:49:01 | 26.012 |
| 3/8/2010 07:11:01 | 25.797 | 3/7/2010 22:39:00 | 27.5 | 3/9/2010 05:09:01 | 26.012 |
| 3/8/2010 07:31:01 | 25.797 | 3/7/2010 23:14:00 | 28.0 | 3/9/2010 05:29:01 | 26.012 |
| 3/8/2010 07:51:01 | 25.797 | 3/7/2010 23:49:00 | 28.0 | 3/9/2010 05:49:01 | 26.012 |
| 3/8/2010 08:11:01 | 25.797 | 3/8/2010 00:24:00 | 28.0 | 3/9/2010 06:09:01 | 26.012 |
| 3/8/2010 08:31:01 | 25.797 | 3/8/2010 00:59:00 | 28.0 | 3/9/2010 06:29:01 | 26.012 |
| 3/8/2010 08:51:01 | 25.797 | 3/8/2010 01:34:00 | 28.0 | 3/9/2010 06:49:01 | 26.012 |
| 3/8/2010 09:11:01 | 25.797 | 3/8/2010 02:09:00 | 27.5 | 3/9/2010 07:09:01 | 26.012 |
| 3/8/2010 09:31:01 | 25.797 | 3/8/2010 02:44:00 | 27.5 | 3/9/2010 07:29:01 | 26.012 |
| 3/8/2010 09:51:01 | 25.797 | 3/8/2010 03:19:00 | 27.5 | 3/9/2010 07:49:01 | 25.949 |
| 3/8/2010 10:11:01 | 25.797 | 3/8/2010 03:54:00 | 27.5 | 3/9/2010 08:09:01 | 26.012 |
| 3/8/2010 10:31:01 | 25.797 | 3/8/2010 04:29:00 | 27.5 | 3/9/2010 08:29:01 | 25.949 |
| 3/8/2010 10:51:01 | 25.797 | 3/8/2010 05:04:00 | 27.5 | 3/9/2010 08:49:01 | 25.949 |
| 3/8/2010 11:11:01 | 25.797 | 3/8/2010 05:39:00 | 27.5 | 3/9/2010 09:09:01 | 25.949 |
| 3/8/2010 11:31:01 | 25.797 | 3/8/2010 06:14:00 | 27.5 | 3/9/2010 09:29:01 | 25.949 |

|                   |        |                   |      |                    |        |
|-------------------|--------|-------------------|------|--------------------|--------|
| 3/8/2010 11:51:01 | 25.734 | 3/8/2010 06:49:00 | 27.5 | 3/9/2010 09:49:01  | 25.949 |
| 3/8/2010 12:11:01 | 25.734 | 3/8/2010 07:24:00 | 27.0 | 3/9/2010 10:09:01  | 25.949 |
| 3/8/2010 12:31:01 | 25.734 | 3/8/2010 07:59:00 | 27.5 | 3/9/2010 10:29:01  | 25.949 |
| 3/8/2010 12:51:01 | 25.734 | 3/8/2010 08:34:00 | 27.5 | 3/9/2010 10:49:01  | 25.949 |
| 3/8/2010 13:11:01 | 25.734 | 3/8/2010 09:09:00 | 27.5 | 3/9/2010 11:09:01  | 25.949 |
| 3/8/2010 13:31:01 | 25.734 | 3/8/2010 09:44:00 | 27.5 | 3/9/2010 11:29:01  | 25.949 |
| 3/8/2010 13:51:01 | 25.734 | 3/8/2010 10:19:00 | 27.5 | 3/9/2010 11:49:01  | 25.949 |
| 3/8/2010 14:11:01 | 25.734 | 3/8/2010 10:54:00 | 27.5 | 3/9/2010 12:09:01  | 25.949 |
| 3/8/2010 14:31:01 | 25.734 | 3/8/2010 11:29:00 | 27.5 | 3/9/2010 12:29:01  | 25.949 |
| 3/8/2010 14:51:01 | 25.734 | 3/8/2010 12:04:00 | 27.5 | 3/9/2010 12:49:01  | 25.949 |
| 3/8/2010 15:11:01 | 25.734 | 3/8/2010 12:39:00 | 27.5 | 3/9/2010 13:09:01  | 25.949 |
| 3/8/2010 15:31:01 | 25.734 | 3/8/2010 13:14:00 | 27.0 | 3/9/2010 13:29:01  | 25.949 |
| 3/8/2010 15:51:01 | 25.734 | 3/8/2010 13:49:00 | 27.5 | 3/9/2010 13:49:01  | 25.949 |
| 3/8/2010 16:11:01 | 25.734 | 3/8/2010 14:24:00 | 27.5 | 3/9/2010 14:09:01  | 25.949 |
| 3/8/2010 16:31:01 | 25.734 | 3/8/2010 14:59:00 | 27.5 | 3/9/2010 14:29:01  | 25.949 |
| 3/8/2010 16:51:01 | 25.734 | 3/8/2010 15:34:00 | 27.5 | 3/9/2010 14:49:01  | 25.949 |
| 3/8/2010 17:11:01 | 25.734 | 3/8/2010 16:09:00 | 27.5 | 3/9/2010 15:09:01  | 25.949 |
| 3/8/2010 17:31:01 | 25.734 | 3/8/2010 16:44:00 | 27.5 | 3/9/2010 15:29:01  | 25.949 |
| 3/8/2010 17:51:01 | 25.734 | 3/8/2010 17:19:00 | 27.5 | 3/9/2010 15:49:01  | 25.949 |
| 3/8/2010 18:11:01 | 25.734 | 3/8/2010 17:54:00 | 27.5 | 3/9/2010 16:09:01  | 25.949 |
| 3/8/2010 18:31:01 | 25.734 | 3/8/2010 18:29:00 | 27.5 | 3/9/2010 16:29:01  | 25.949 |
| 3/8/2010 18:51:01 | 25.734 | 3/8/2010 19:04:00 | 27.5 | 3/9/2010 16:49:01  | 25.949 |
| 3/8/2010 19:11:01 | 25.797 | 3/8/2010 19:39:00 | 27.5 | 3/9/2010 17:09:01  | 25.949 |
| 3/8/2010 19:31:01 | 25.797 | 3/8/2010 20:14:00 | 27.5 | 3/9/2010 17:29:01  | 25.949 |
| 3/8/2010 19:51:01 | 25.797 | 3/8/2010 20:49:00 | 28.0 | 3/9/2010 17:49:01  | 25.949 |
| 3/8/2010 20:11:01 | 25.797 | 3/8/2010 21:24:00 | 28.0 | 3/9/2010 18:09:01  | 26.012 |
| 3/8/2010 20:31:01 | 25.797 | 3/8/2010 21:59:00 | 28.5 | 3/9/2010 18:29:01  | 26.012 |
| 3/8/2010 20:51:01 | 25.797 | 3/8/2010 22:34:00 | 28.0 | 3/9/2010 18:49:01  | 26.012 |
| 3/8/2010 21:11:01 | 25.797 | 3/8/2010 23:09:00 | 28.0 | 3/9/2010 19:09:01  | 26.012 |
| 3/8/2010 21:31:01 | 25.797 | 3/8/2010 23:44:00 | 28.0 | 3/9/2010 19:29:01  | 26.012 |
| 3/8/2010 21:51:01 | 25.797 | 3/9/2010 00:19:00 | 27.5 | 3/9/2010 19:49:01  | 26.012 |
| 3/8/2010 22:11:01 | 25.797 | 3/9/2010 00:54:00 | 27.5 | 3/9/2010 20:09:01  | 26.012 |
| 3/8/2010 22:31:01 | 25.797 | 3/9/2010 01:29:00 | 27.5 | 3/9/2010 20:29:01  | 26.074 |
| 3/8/2010 22:51:01 | 25.797 | 3/9/2010 02:04:00 | 27.5 | 3/9/2010 20:49:01  | 26.074 |
| 3/8/2010 23:11:01 | 25.797 | 3/9/2010 02:39:00 | 27.5 | 3/9/2010 21:09:01  | 26.074 |
| 3/8/2010 23:31:01 | 25.797 | 3/9/2010 03:14:00 | 27.5 | 3/9/2010 21:29:01  | 26.074 |
| 3/8/2010 23:51:01 | 25.797 | 3/9/2010 03:49:00 | 27.5 | 3/9/2010 21:49:01  | 26.074 |
| 3/9/2010 00:11:01 | 25.797 | 3/9/2010 04:24:00 | 27.5 | 3/9/2010 22:09:01  | 26.074 |
| 3/9/2010 00:31:01 | 25.797 | 3/9/2010 04:59:00 | 27.5 | 3/9/2010 22:29:01  | 26.074 |
| 3/9/2010 00:51:01 | 25.797 | 3/9/2010 05:34:00 | 27.5 | 3/9/2010 22:49:01  | 26.074 |
| 3/9/2010 01:11:01 | 25.797 | 3/9/2010 06:09:00 | 27.5 | 3/9/2010 23:09:01  | 26.137 |
| 3/9/2010 01:31:01 | 25.797 | 3/9/2010 06:44:00 | 27.0 | 3/9/2010 23:29:01  | 26.137 |
| 3/9/2010 01:51:01 | 25.859 | 3/9/2010 07:19:00 | 27.0 | 3/9/2010 23:49:01  | 26.137 |
| 3/9/2010 02:11:01 | 25.859 | 3/9/2010 07:54:00 | 27.0 | 3/10/2010 00:09:01 | 26.137 |
| 3/9/2010 02:31:01 | 25.859 | 3/9/2010 08:29:00 | 27.0 | 3/10/2010 00:29:01 | 26.137 |
| 3/9/2010 02:51:01 | 25.859 | 3/9/2010 09:04:00 | 27.5 | 3/10/2010 00:49:01 | 26.137 |
| 3/9/2010 03:11:01 | 25.797 | 3/9/2010 09:39:00 | 27.5 | 3/10/2010 01:09:01 | 26.137 |
| 3/9/2010 03:31:01 | 25.859 | 3/9/2010 10:14:00 | 27.5 | 3/10/2010 01:29:01 | 26.137 |
| 3/9/2010 03:51:01 | 25.797 | 3/9/2010 10:49:00 | 27.5 | 3/10/2010 01:49:01 | 26.137 |
| 3/9/2010 04:11:01 | 25.797 | 3/9/2010 11:24:00 | 27.5 | 3/10/2010 02:09:01 | 26.137 |

|                   |        |                    |      |                    |        |
|-------------------|--------|--------------------|------|--------------------|--------|
| 3/9/2010 04:31:01 | 25.797 | 3/9/2010 11:59:00  | 27.5 | 3/10/2010 02:29:01 | 26.137 |
| 3/9/2010 04:51:01 | 25.859 | 3/9/2010 12:34:00  | 27.5 | 3/10/2010 02:49:01 | 26.137 |
| 3/9/2010 05:11:01 | 25.797 | 3/9/2010 13:09:00  | 27.5 | 3/10/2010 03:09:01 | 26.137 |
| 3/9/2010 05:31:01 | 25.859 | 3/9/2010 13:44:00  | 27.5 | 3/10/2010 03:29:01 | 26.137 |
| 3/9/2010 05:51:01 | 25.797 | 3/9/2010 14:19:00  | 27.5 | 3/10/2010 03:49:01 | 26.137 |
| 3/9/2010 06:11:01 | 25.797 | 3/9/2010 14:54:00  | 27.5 | 3/10/2010 04:09:01 | 26.137 |
| 3/9/2010 06:31:01 | 25.797 | 3/9/2010 15:29:00  | 27.5 | 3/10/2010 04:29:01 | 26.137 |
| 3/9/2010 06:51:01 | 25.797 | 3/9/2010 16:04:00  | 27.5 | 3/10/2010 04:49:01 | 26.199 |
| 3/9/2010 07:11:01 | 25.797 | 3/9/2010 16:39:00  | 27.5 | 3/10/2010 05:09:01 | 26.199 |
| 3/9/2010 07:31:01 | 25.797 | 3/9/2010 17:14:00  | 27.5 | 3/10/2010 05:29:01 | 26.199 |
| 3/9/2010 07:51:01 | 25.797 | 3/9/2010 17:49:00  | 27.5 | 3/10/2010 05:49:01 | 26.137 |
| 3/9/2010 08:11:01 | 25.797 | 3/9/2010 18:24:00  | 27.5 | 3/10/2010 06:09:01 | 26.199 |
| 3/9/2010 08:31:01 | 25.797 | 3/9/2010 18:59:00  | 27.5 | 3/10/2010 06:29:01 | 26.137 |
| 3/9/2010 08:51:01 | 25.797 | 3/9/2010 19:34:00  | 27.5 | 3/10/2010 06:49:01 | 26.199 |
| 3/9/2010 09:11:01 | 25.797 | 3/9/2010 20:09:00  | 27.5 | 3/10/2010 07:09:01 | 26.199 |
| 3/9/2010 09:31:01 | 25.797 | 3/9/2010 20:44:00  | 28.0 | 3/10/2010 07:29:01 | 26.137 |
| 3/9/2010 09:51:01 | 25.797 | 3/9/2010 21:19:00  | 28.0 | 3/10/2010 07:49:01 | 26.199 |
| 3/9/2010 10:11:01 | 25.797 | 3/9/2010 21:54:00  | 28.0 | 3/10/2010 08:09:01 | 26.199 |
| 3/9/2010 10:31:01 | 25.797 | 3/9/2010 22:29:00  | 28.0 | 3/10/2010 08:29:01 | 26.137 |
| 3/9/2010 10:51:01 | 25.797 | 3/9/2010 23:04:00  | 27.5 | 3/10/2010 08:49:01 | 26.199 |
| 3/9/2010 11:11:01 | 25.797 | 3/9/2010 23:39:00  | 28.0 | 3/10/2010 09:09:01 | 26.137 |
| 3/9/2010 11:31:01 | 25.797 | 3/10/2010 00:14:00 | 28.0 | 3/10/2010 09:29:01 | 26.137 |
| 3/9/2010 11:51:01 | 25.797 | 3/10/2010 00:49:00 | 28.0 | 3/10/2010 09:49:01 | 26.137 |
| 3/9/2010 12:11:01 | 25.797 | 3/10/2010 01:24:00 | 28.0 | 3/10/2010 10:09:01 | 26.137 |
| 3/9/2010 12:31:01 | 25.797 | 3/10/2010 01:59:00 | 28.0 | 3/10/2010 10:29:01 | 26.137 |
| 3/9/2010 12:51:01 | 25.797 | 3/10/2010 02:34:00 | 28.0 | 3/10/2010 10:49:01 | 26.199 |
| 3/9/2010 13:11:01 | 25.797 | 3/10/2010 03:09:00 | 27.5 | 3/10/2010 11:09:01 | 26.137 |
| 3/9/2010 13:31:01 | 25.797 | 3/10/2010 03:44:00 | 27.5 | 3/10/2010 11:29:01 | 26.137 |
| 3/9/2010 13:51:01 | 25.797 | 3/10/2010 04:19:00 | 28.0 | 3/10/2010 11:49:01 | 26.137 |
| 3/9/2010 14:11:01 | 25.797 | 3/10/2010 04:54:00 | 28.0 | 3/10/2010 12:09:01 | 26.137 |
| 3/9/2010 14:31:01 | 25.734 | 3/10/2010 05:29:00 | 28.0 | 3/10/2010 12:29:01 | 26.137 |
| 3/9/2010 14:51:01 | 25.797 | 3/10/2010 06:04:00 | 28.0 | 3/10/2010 12:49:01 | 26.137 |
| 3/9/2010 15:11:01 | 25.734 | 3/10/2010 06:39:00 | 28.0 | 3/10/2010 13:09:01 | 26.137 |
| 3/9/2010 15:31:01 | 25.734 | 3/10/2010 07:14:00 | 28.0 | 3/10/2010 13:29:01 | 26.137 |
| 3/9/2010 15:51:01 | 25.734 | 3/10/2010 07:49:00 | 28.0 | 3/10/2010 13:49:01 | 26.137 |
| 3/9/2010 16:11:01 | 25.734 | 3/10/2010 08:24:00 | 28.0 | 3/10/2010 14:09:01 | 26.137 |
| 3/9/2010 16:31:01 | 25.734 | 3/10/2010 08:59:00 | 28.0 | 3/10/2010 14:29:01 | 26.137 |
| 3/9/2010 16:51:01 | 25.734 | 3/10/2010 09:34:00 | 28.0 | 3/10/2010 14:49:01 | 26.137 |
| 3/9/2010 17:11:01 | 25.797 | 3/10/2010 10:09:00 | 28.0 | 3/10/2010 15:09:01 | 26.199 |
| 3/9/2010 17:31:01 | 25.734 | 3/10/2010 10:44:00 | 28.0 | 3/10/2010 15:29:01 | 26.199 |
| 3/9/2010 17:51:01 | 25.797 | 3/10/2010 11:19:00 | 28.0 | 3/10/2010 15:49:01 | 26.199 |
| 3/9/2010 18:11:01 | 25.797 | 3/10/2010 11:54:00 | 28.0 | 3/10/2010 16:09:01 | 26.199 |
| 3/9/2010 18:31:01 | 25.797 | 3/10/2010 12:29:00 | 28.0 | 3/10/2010 16:29:01 | 26.199 |
| 3/9/2010 18:51:01 | 25.797 | 3/10/2010 13:04:00 | 28.0 | 3/10/2010 16:49:01 | 26.199 |
| 3/9/2010 19:11:01 | 25.797 | 3/10/2010 13:39:00 | 28.0 | 3/10/2010 17:09:01 | 26.199 |
| 3/9/2010 19:31:01 | 25.797 | 3/10/2010 14:14:00 | 28.0 | 3/10/2010 17:29:01 | 26.199 |
| 3/9/2010 19:51:01 | 25.797 | 3/10/2010 14:49:00 | 28.5 | 3/10/2010 17:49:01 | 26.199 |
| 3/9/2010 20:11:01 | 25.797 | 3/10/2010 15:24:00 | 28.5 | 3/10/2010 18:09:01 | 26.199 |
| 3/9/2010 20:31:01 | 25.797 | 3/10/2010 15:59:00 | 28.5 | 3/10/2010 18:29:01 | 26.199 |
| 3/9/2010 20:51:01 | 25.797 | 3/10/2010 16:34:00 | 28.5 | 3/10/2010 18:49:01 | 26.199 |

|                    |        |                    |      |                    |        |
|--------------------|--------|--------------------|------|--------------------|--------|
| 3/9/2010 21:11:01  | 25.797 | 3/10/2010 17:09:00 | 28.0 | 3/10/2010 19:09:01 | 26.262 |
| 3/9/2010 21:31:01  | 25.797 | 3/10/2010 17:44:00 | 28.0 | 3/10/2010 19:29:01 | 26.262 |
| 3/9/2010 21:51:01  | 25.797 | 3/10/2010 18:19:00 | 28.0 | 3/10/2010 19:49:01 | 26.262 |
| 3/9/2010 22:11:01  | 25.797 | 3/10/2010 18:54:00 | 28.0 | 3/10/2010 20:09:01 | 26.262 |
| 3/9/2010 22:31:01  | 25.797 | 3/10/2010 19:29:00 | 28.0 | 3/10/2010 20:29:01 | 26.262 |
| 3/9/2010 22:51:01  | 25.859 | 3/10/2010 20:04:00 | 28.0 | 3/10/2010 20:49:01 | 26.262 |
| 3/9/2010 23:11:01  | 25.859 | 3/10/2010 20:39:00 | 28.0 | 3/10/2010 21:09:01 | 26.262 |
| 3/9/2010 23:31:01  | 25.859 | 3/10/2010 21:14:00 | 28.0 | 3/10/2010 21:29:01 | 26.262 |
| 3/9/2010 23:51:01  | 25.859 | 3/10/2010 21:49:00 | 28.0 | 3/10/2010 21:49:01 | 26.262 |
| 3/10/2010 00:11:01 | 25.859 | 3/10/2010 22:24:00 | 28.0 | 3/10/2010 22:09:01 | 26.324 |
| 3/10/2010 00:31:01 | 25.859 | 3/10/2010 22:59:00 | 28.0 | 3/10/2010 22:29:01 | 26.324 |
| 3/10/2010 00:51:01 | 25.859 | 3/10/2010 23:34:00 | 28.0 | 3/10/2010 22:49:01 | 26.324 |
| 3/10/2010 01:11:01 | 25.859 | 3/11/2010 00:09:00 | 28.0 | 3/10/2010 23:09:01 | 26.324 |
| 3/10/2010 01:31:01 | 25.859 | 3/11/2010 00:44:00 | 28.0 | 3/10/2010 23:29:01 | 26.324 |
| 3/10/2010 01:51:01 | 25.859 | 3/11/2010 01:19:00 | 28.0 | 3/10/2010 23:49:01 | 26.324 |
| 3/10/2010 02:11:01 | 25.859 | 3/11/2010 01:54:00 | 28.0 | 3/11/2010 00:09:01 | 26.324 |
| 3/10/2010 02:31:01 | 25.859 | 3/11/2010 02:29:00 | 28.0 | 3/11/2010 00:29:01 | 26.324 |
| 3/10/2010 02:51:01 | 25.859 | 3/11/2010 03:04:00 | 28.0 | 3/11/2010 00:49:01 | 26.324 |
| 3/10/2010 03:11:01 | 25.859 | 3/11/2010 03:39:00 | 28.0 | 3/11/2010 01:09:01 | 26.324 |
| 3/10/2010 03:31:01 | 25.859 | 3/11/2010 04:14:00 | 28.0 | 3/11/2010 01:29:01 | 26.324 |
| 3/10/2010 03:51:01 | 25.859 | 3/11/2010 04:49:00 | 28.0 | 3/11/2010 01:49:01 | 26.324 |
| 3/10/2010 04:11:01 | 25.859 | 3/11/2010 05:24:00 | 27.5 | 3/11/2010 02:09:01 | 26.387 |
| 3/10/2010 04:31:01 | 25.859 | 3/11/2010 05:59:00 | 27.5 | 3/11/2010 02:29:01 | 26.387 |
| 3/10/2010 04:51:01 | 25.922 | 3/11/2010 06:34:00 | 27.5 | 3/11/2010 02:49:01 | 26.387 |
| 3/10/2010 05:11:01 | 25.922 | 3/11/2010 07:09:00 | 27.5 | 3/11/2010 03:09:01 | 26.387 |
| 3/10/2010 05:31:01 | 25.922 | 3/11/2010 07:44:00 | 28.0 | 3/11/2010 03:29:01 | 26.387 |
| 3/10/2010 05:51:01 | 25.922 | 3/11/2010 08:19:00 | 28.0 | 3/11/2010 03:49:01 | 26.387 |
| 3/10/2010 06:11:01 | 25.922 | 3/11/2010 08:54:00 | 27.5 | 3/11/2010 04:09:01 | 26.387 |
| 3/10/2010 06:31:01 | 25.922 | 3/11/2010 09:29:00 | 27.5 | 3/11/2010 04:29:01 | 26.387 |
| 3/10/2010 06:51:01 | 25.922 | 3/11/2010 10:04:00 | 27.5 | 3/11/2010 04:49:01 | 26.387 |
| 3/10/2010 07:11:01 | 25.922 | 3/11/2010 10:39:00 | 27.5 | 3/11/2010 05:09:01 | 26.387 |
| 3/10/2010 07:31:01 | 25.922 | 3/11/2010 11:14:00 | 27.5 | 3/11/2010 05:29:01 | 26.387 |
| 3/10/2010 07:51:01 | 25.922 | 3/11/2010 11:49:00 | 28.0 | 3/11/2010 05:49:01 | 26.387 |
| 3/10/2010 08:11:01 | 25.922 | 3/11/2010 12:24:00 | 28.0 | 3/11/2010 06:09:01 | 26.387 |
| 3/10/2010 08:31:01 | 25.922 | 3/11/2010 12:59:00 | 28.0 | 3/11/2010 06:29:01 | 26.387 |
| 3/10/2010 08:51:01 | 25.922 | 3/11/2010 13:34:00 | 28.0 | 3/11/2010 06:49:01 | 26.387 |
| 3/10/2010 09:11:01 | 25.922 | 3/11/2010 14:09:00 | 28.0 | 3/11/2010 07:09:01 | 26.324 |
| 3/10/2010 09:31:01 | 25.922 | 3/11/2010 14:44:00 | 28.0 | 3/11/2010 07:29:01 | 26.324 |
| 3/10/2010 09:51:01 | 25.922 | 3/11/2010 15:19:00 | 28.0 | 3/11/2010 07:49:01 | 26.324 |
| 3/10/2010 10:11:01 | 25.922 | 3/11/2010 15:54:00 | 28.0 | 3/11/2010 08:09:01 | 26.324 |
| 3/10/2010 10:31:01 | 25.922 | 3/11/2010 16:29:00 | 28.0 | 3/11/2010 08:29:01 | 26.324 |
| 3/10/2010 10:51:01 | 25.922 | 3/11/2010 17:04:00 | 28.0 | 3/11/2010 08:49:01 | 26.324 |
| 3/10/2010 11:11:01 | 25.922 | 3/11/2010 17:39:00 | 28.0 | 3/11/2010 09:09:01 | 26.324 |
| 3/10/2010 11:31:01 | 25.922 | 3/11/2010 18:14:00 | 28.0 | 3/11/2010 09:29:01 | 26.324 |
| 3/10/2010 11:51:01 | 25.922 | 3/11/2010 18:49:00 | 28.0 | 3/11/2010 09:49:01 | 26.324 |
| 3/10/2010 12:11:01 | 25.922 | 3/11/2010 19:24:00 | 28.0 | 3/11/2010 10:09:01 | 26.324 |
| 3/10/2010 12:31:01 | 25.922 | 3/11/2010 19:59:00 | 28.0 | 3/11/2010 10:29:01 | 26.324 |
| 3/10/2010 12:51:01 | 25.922 | 3/11/2010 20:34:00 | 28.0 | 3/11/2010 10:49:01 | 26.324 |
| 3/10/2010 13:11:01 | 25.922 | 3/11/2010 21:09:00 | 28.0 | 3/11/2010 11:09:01 | 26.324 |
| 3/10/2010 13:31:01 | 25.922 | 3/11/2010 21:44:00 | 28.0 | 3/11/2010 11:29:01 | 26.324 |

|                    |        |                    |      |                    |        |
|--------------------|--------|--------------------|------|--------------------|--------|
| 3/10/2010 13:51:01 | 25.922 | 3/11/2010 22:19:00 | 28.0 | 3/11/2010 11:49:01 | 26.324 |
| 3/10/2010 14:11:01 | 25.922 | 3/11/2010 22:54:00 | 28.0 | 3/11/2010 12:09:01 | 26.262 |
| 3/10/2010 14:31:01 | 25.922 | 3/11/2010 23:29:00 | 28.0 | 3/11/2010 12:29:01 | 26.262 |
| 3/10/2010 14:51:01 | 25.922 | 3/12/2010 00:04:00 | 28.0 | 3/11/2010 12:49:01 | 26.262 |
| 3/10/2010 15:11:01 | 25.922 | 3/12/2010 00:39:00 | 28.0 | 3/11/2010 13:09:01 | 26.262 |
| 3/10/2010 15:31:01 | 25.922 | 3/12/2010 01:14:00 | 28.0 | 3/11/2010 13:29:01 | 26.262 |
| 3/10/2010 15:51:01 | 25.922 | 3/12/2010 01:49:00 | 28.0 | 3/11/2010 13:49:01 | 26.262 |
| 3/10/2010 16:11:01 | 25.922 | 3/12/2010 02:24:00 | 28.0 | 3/11/2010 14:09:01 | 26.262 |
| 3/10/2010 16:31:01 | 25.922 | 3/12/2010 02:59:00 | 28.0 | 3/11/2010 14:29:01 | 26.262 |
| 3/10/2010 16:51:01 | 25.922 | 3/12/2010 03:34:00 | 28.0 | 3/11/2010 14:49:01 | 26.262 |
| 3/10/2010 17:11:01 | 25.922 | 3/12/2010 04:09:00 | 28.0 | 3/11/2010 15:09:01 | 26.262 |
| 3/10/2010 17:31:01 | 25.922 | 3/12/2010 04:44:00 | 28.0 | 3/11/2010 15:29:01 | 26.262 |
| 3/10/2010 17:51:01 | 25.922 | 3/12/2010 05:19:00 | 28.0 | 3/11/2010 15:49:01 | 26.262 |
| 3/10/2010 18:11:01 | 25.922 | 3/12/2010 05:54:00 | 28.0 | 3/11/2010 16:09:01 | 26.262 |
| 3/10/2010 18:31:01 | 25.922 | 3/12/2010 06:29:00 | 27.5 | 3/11/2010 16:29:01 | 26.324 |
| 3/10/2010 18:51:01 | 25.922 | 3/12/2010 07:04:00 | 28.0 | 3/11/2010 16:49:01 | 26.324 |
| 3/10/2010 19:11:01 | 25.922 | 3/12/2010 07:39:00 | 28.0 | 3/11/2010 17:09:01 | 26.324 |
| 3/10/2010 19:31:01 | 25.984 | 3/12/2010 08:14:00 | 28.0 | 3/11/2010 17:29:01 | 26.324 |
| 3/10/2010 19:51:01 | 25.984 | 3/12/2010 08:49:00 | 27.5 | 3/11/2010 17:49:01 | 26.324 |
| 3/10/2010 20:11:01 | 25.984 | 3/12/2010 09:24:00 | 27.5 | 3/11/2010 18:09:01 | 26.324 |
| 3/10/2010 20:31:01 | 25.984 | 3/12/2010 09:59:00 | 27.5 | 3/11/2010 18:29:01 | 26.324 |
| 3/10/2010 20:51:01 | 25.984 | 3/12/2010 10:34:00 | 27.5 | 3/11/2010 18:49:01 | 26.324 |
| 3/10/2010 21:11:01 | 25.984 | 3/12/2010 11:09:00 | 27.5 | 3/11/2010 19:09:01 | 26.324 |
| 3/10/2010 21:31:01 | 25.984 | 3/12/2010 11:44:00 | 27.5 | 3/11/2010 19:29:01 | 26.324 |
| 3/10/2010 21:51:01 | 25.984 | 3/12/2010 12:19:00 | 27.5 | 3/11/2010 19:49:01 | 26.387 |
| 3/10/2010 22:11:01 | 25.984 | 3/12/2010 12:54:00 | 27.5 | 3/11/2010 20:09:01 | 26.387 |
| 3/10/2010 22:31:01 | 25.984 | 3/12/2010 13:29:00 | 27.5 | 3/11/2010 20:29:01 | 26.387 |
| 3/10/2010 22:51:01 | 25.984 | 3/12/2010 14:04:00 | 27.5 | 3/11/2010 20:49:01 | 26.387 |
| 3/10/2010 23:11:01 | 26.047 | 3/12/2010 14:39:00 | 27.5 | 3/11/2010 21:09:01 | 26.387 |
| 3/10/2010 23:31:01 | 26.047 | 3/12/2010 15:14:00 | 27.5 | 3/11/2010 21:29:01 | 26.387 |
| 3/10/2010 23:51:01 | 26.047 | 3/12/2010 15:49:00 | 27.5 | 3/11/2010 21:49:01 | 26.387 |
| 3/11/2010 00:11:01 | 26.047 | 3/12/2010 16:24:00 | 27.5 | 3/11/2010 22:09:01 | 26.387 |
| 3/11/2010 00:31:01 | 26.047 | 3/12/2010 16:59:00 | 27.5 | 3/11/2010 22:29:01 | 26.387 |
| 3/11/2010 00:51:01 | 26.047 | 3/12/2010 17:34:00 | 27.5 | 3/11/2010 22:49:01 | 26.449 |
| 3/11/2010 01:11:01 | 26.047 | 3/12/2010 18:09:00 | 27.5 | 3/11/2010 23:09:01 | 26.449 |
| 3/11/2010 01:31:01 | 26.047 | 3/12/2010 18:44:00 | 27.5 | 3/11/2010 23:29:01 | 26.449 |
| 3/11/2010 01:51:01 | 26.047 | 3/12/2010 19:19:00 | 28.0 | 3/11/2010 23:49:01 | 26.449 |
| 3/11/2010 02:11:01 | 26.047 | 3/12/2010 19:54:00 | 28.5 | 3/12/2010 00:09:01 | 26.449 |
| 3/11/2010 02:31:01 | 26.047 | 3/12/2010 20:29:00 | 28.0 | 3/12/2010 00:29:01 | 26.449 |
| 3/11/2010 02:51:01 | 26.047 | 3/12/2010 21:04:00 | 28.0 | 3/12/2010 00:49:01 | 26.449 |
| 3/11/2010 03:11:01 | 26.047 | 3/12/2010 21:39:00 | 28.0 | 3/12/2010 01:09:01 | 26.449 |
| 3/11/2010 03:31:01 | 26.047 | 3/12/2010 22:14:00 | 28.0 | 3/12/2010 01:29:01 | 26.449 |
| 3/11/2010 03:51:01 | 26.047 | 3/12/2010 22:49:00 | 28.0 | 3/12/2010 01:49:01 | 26.449 |
| 3/11/2010 04:11:01 | 26.109 | 3/12/2010 23:24:00 | 28.0 | 3/12/2010 02:09:01 | 26.449 |
| 3/11/2010 04:31:01 | 26.047 | 3/12/2010 23:59:00 | 28.0 | 3/12/2010 02:29:01 | 26.449 |
| 3/11/2010 04:51:01 | 26.109 | 3/13/2010 00:34:00 | 27.5 | 3/12/2010 02:49:01 | 26.449 |
| 3/11/2010 05:11:01 | 26.109 | 3/13/2010 01:09:00 | 27.5 | 3/12/2010 03:09:01 | 26.449 |
| 3/11/2010 05:31:01 | 26.109 | 3/13/2010 01:44:00 | 27.5 | 3/12/2010 03:29:01 | 26.449 |
| 3/11/2010 05:51:01 | 26.109 | 3/13/2010 02:19:00 | 27.5 | 3/12/2010 03:49:01 | 26.449 |
| 3/11/2010 06:11:01 | 26.109 | 3/13/2010 02:54:00 | 27.5 | 3/12/2010 04:09:01 | 26.449 |



|                    |        |                    |      |                    |        |
|--------------------|--------|--------------------|------|--------------------|--------|
| 3/11/2010 06:31:01 | 26.109 | 3/13/2010 03:29:00 | 27.5 | 3/12/2010 04:29:01 | 26.449 |
| 3/11/2010 06:51:01 | 26.109 | 3/13/2010 04:04:00 | 27.5 | 3/12/2010 04:49:01 | 26.449 |
| 3/11/2010 07:11:01 | 26.109 | 3/13/2010 04:39:00 | 27.5 | 3/12/2010 05:09:01 | 26.449 |
| 3/11/2010 07:31:01 | 26.109 | 3/13/2010 05:14:00 | 27.5 | 3/12/2010 05:29:01 | 26.449 |
| 3/11/2010 07:51:01 | 26.109 | 3/13/2010 05:49:00 | 27.5 | 3/12/2010 05:49:01 | 26.387 |
| 3/11/2010 08:11:01 | 26.109 | 3/13/2010 06:24:00 | 27.5 | 3/12/2010 06:09:01 | 26.387 |
| 3/11/2010 08:31:01 | 26.109 | 3/13/2010 06:59:00 | 27.5 | 3/12/2010 06:29:01 | 26.387 |
| 3/11/2010 08:51:01 | 26.109 | 3/13/2010 07:34:00 | 27.5 | 3/12/2010 06:49:01 | 26.387 |
| 3/11/2010 09:11:01 | 26.109 | 3/13/2010 08:09:00 | 27.5 | 3/12/2010 07:09:01 | 26.387 |
| 3/11/2010 09:31:01 | 26.109 | 3/13/2010 08:44:00 | 27.5 | 3/12/2010 07:29:01 | 26.387 |
| 3/11/2010 09:51:01 | 26.109 | 3/13/2010 09:19:00 | 27.5 | 3/12/2010 07:49:01 | 26.387 |
| 3/11/2010 10:11:01 | 26.109 | 3/13/2010 09:54:00 | 27.5 | 3/12/2010 08:09:01 | 26.387 |
| 3/11/2010 10:31:01 | 26.047 | 3/13/2010 10:29:00 | 27.5 | 3/12/2010 08:29:01 | 26.387 |
| 3/11/2010 10:51:01 | 26.109 | 3/13/2010 11:04:00 | 27.5 | 3/12/2010 08:49:01 | 26.387 |
| 3/11/2010 11:11:01 | 26.047 | 3/13/2010 11:39:00 | 27.5 | 3/12/2010 09:09:01 | 26.387 |
| 3/11/2010 11:31:01 | 26.047 | 3/13/2010 12:14:00 | 27.5 | 3/12/2010 09:29:01 | 26.387 |
| 3/11/2010 11:51:01 | 26.047 | 3/13/2010 12:49:00 | 27.5 | 3/12/2010 09:49:01 | 26.324 |
| 3/11/2010 12:11:01 | 26.047 | 3/13/2010 13:24:00 | 27.5 | 3/12/2010 10:09:01 | 26.324 |
| 3/11/2010 12:31:01 | 26.047 | 3/13/2010 13:59:00 | 27.5 | 3/12/2010 10:29:01 | 26.324 |
| 3/11/2010 12:51:01 | 26.047 | 3/13/2010 14:34:00 | 27.5 | 3/12/2010 10:49:01 | 26.324 |
| 3/11/2010 13:11:01 | 26.047 | 3/13/2010 15:09:00 | 27.5 | 3/12/2010 11:09:01 | 26.324 |
| 3/11/2010 13:31:01 | 26.047 | 3/13/2010 15:44:00 | 27.5 | 3/12/2010 11:29:01 | 26.324 |
| 3/11/2010 13:51:01 | 26.047 | 3/13/2010 16:19:00 | 27.5 | 3/12/2010 11:49:01 | 26.324 |
| 3/11/2010 14:11:01 | 26.047 | 3/13/2010 16:54:00 | 27.5 | 3/12/2010 12:09:01 | 26.262 |
| 3/11/2010 14:31:01 | 26.047 | 3/13/2010 17:29:00 | 27.5 | 3/12/2010 12:29:01 | 26.262 |
| 3/11/2010 14:51:01 | 26.047 | 3/13/2010 18:04:00 | 27.5 | 3/12/2010 12:49:01 | 26.262 |
| 3/11/2010 15:11:01 | 26.047 | 3/13/2010 18:39:00 | 27.5 | 3/12/2010 13:09:01 | 26.262 |
| 3/11/2010 15:31:01 | 26.047 | 3/13/2010 19:14:00 | 27.5 | 3/12/2010 13:29:01 | 26.262 |
| 3/11/2010 15:51:01 | 26.047 | 3/13/2010 19:49:00 | 28.0 | 3/12/2010 13:49:01 | 26.262 |
| 3/11/2010 16:11:01 | 26.047 | 3/13/2010 20:24:00 | 28.0 | 3/12/2010 14:09:01 | 26.262 |
| 3/11/2010 16:31:01 | 26.047 | 3/13/2010 20:59:00 | 28.0 | 3/12/2010 14:29:01 | 26.262 |
| 3/11/2010 16:51:01 | 26.047 | 3/13/2010 21:34:00 | 28.5 | 3/12/2010 14:49:01 | 26.262 |
| 3/11/2010 17:11:01 | 26.047 | 3/13/2010 22:09:00 | 28.5 | 3/12/2010 15:09:01 | 26.262 |
| 3/11/2010 17:31:01 | 26.047 | 3/13/2010 22:44:00 | 28.5 | 3/12/2010 15:29:01 | 26.199 |
| 3/11/2010 17:51:01 | 26.047 | 3/13/2010 23:19:00 | 28.0 | 3/12/2010 15:49:01 | 26.199 |
| 3/11/2010 18:11:01 | 26.047 | 3/13/2010 23:54:00 | 28.0 | 3/12/2010 16:09:01 | 26.199 |
| 3/11/2010 18:31:01 | 26.047 | 3/14/2010 00:29:00 | 28.0 | 3/12/2010 16:29:01 | 26.199 |
| 3/11/2010 18:51:01 | 26.109 | 3/14/2010 01:04:00 | 28.0 | 3/12/2010 16:49:01 | 26.199 |
| 3/11/2010 19:11:01 | 26.109 | 3/14/2010 01:39:00 | 28.0 | 3/12/2010 17:09:01 | 26.199 |
| 3/11/2010 19:31:01 | 26.109 | 3/14/2010 02:14:00 | 28.0 | 3/12/2010 17:29:01 | 26.199 |
| 3/11/2010 19:51:01 | 26.109 | 3/14/2010 02:49:00 | 28.0 | 3/12/2010 17:49:01 | 26.199 |
| 3/11/2010 20:11:01 | 26.109 | 3/14/2010 03:24:00 | 27.5 | 3/12/2010 18:09:01 | 26.199 |
| 3/11/2010 20:31:01 | 26.109 | 3/14/2010 03:59:00 | 27.5 | 3/12/2010 18:29:01 | 26.199 |
| 3/11/2010 20:51:01 | 26.109 | 3/14/2010 04:34:00 | 27.5 | 3/12/2010 18:49:01 | 26.199 |
| 3/11/2010 21:11:01 | 26.109 | 3/14/2010 05:09:00 | 27.5 | 3/12/2010 19:09:01 | 26.199 |
| 3/11/2010 21:31:01 | 26.109 | 3/14/2010 05:44:00 | 27.5 | 3/12/2010 19:29:01 | 26.262 |
| 3/11/2010 21:51:01 | 26.109 | 3/14/2010 06:19:00 | 27.5 | 3/12/2010 19:49:01 | 26.262 |
| 3/11/2010 22:11:01 | 26.109 | 3/14/2010 06:54:00 | 27.5 | 3/12/2010 20:09:01 | 26.262 |
| 3/11/2010 22:31:01 | 26.109 | 3/14/2010 07:29:00 | 27.5 | 3/12/2010 20:29:01 | 26.262 |
| 3/11/2010 22:51:01 | 26.109 | 3/14/2010 08:04:00 | 27.5 | 3/12/2010 20:49:01 | 26.262 |

|                    |                           |                         |        |
|--------------------|---------------------------|-------------------------|--------|
| 3/11/2010 23:11:01 | 26.172 3/14/2010 08:39:00 | 27.5 3/12/2010 21:09:01 | 26.262 |
| 3/11/2010 23:31:01 | 26.172 3/14/2010 09:14:00 | 27.5 3/12/2010 21:29:01 | 26.262 |
| 3/11/2010 23:51:01 | 26.172 3/14/2010 09:49:00 | 27.5 3/12/2010 21:49:01 | 26.262 |
| 3/12/2010 00:11:01 | 26.172 3/14/2010 10:24:00 | 27.5 3/12/2010 22:09:01 | 26.262 |
| 3/12/2010 00:31:01 | 26.172 3/14/2010 10:59:00 | 27.5 3/12/2010 22:29:01 | 26.262 |
| 3/12/2010 00:51:01 | 26.172 3/14/2010 11:34:00 | 27.5 3/12/2010 22:49:01 | 26.262 |
| 3/12/2010 01:11:01 | 26.172 3/14/2010 12:09:00 | 27.5 3/12/2010 23:09:01 | 26.262 |
| 3/12/2010 01:31:01 | 26.172 3/14/2010 12:44:00 | 27.5 3/12/2010 23:29:01 | 26.262 |
| 3/12/2010 01:51:01 | 26.172 3/14/2010 13:19:00 | 27.5 3/12/2010 23:49:01 | 26.262 |
| 3/12/2010 02:11:01 | 26.172 3/14/2010 13:54:00 | 27.5 3/13/2010 00:09:01 | 26.324 |
| 3/12/2010 02:31:01 | 26.172 3/14/2010 14:29:00 | 27.5 3/13/2010 00:29:01 | 26.324 |
| 3/12/2010 02:51:01 | 26.172 3/14/2010 15:04:00 | 27.5 3/13/2010 00:49:01 | 26.324 |
| 3/12/2010 03:11:01 | 26.172 3/14/2010 15:39:00 | 27.5 3/13/2010 01:09:01 | 26.324 |
| 3/12/2010 03:31:01 | 26.172 3/14/2010 16:14:00 | 27.5 3/13/2010 01:29:01 | 26.324 |
| 3/12/2010 03:51:01 | 26.172 3/14/2010 16:49:00 | 27.5 3/13/2010 01:49:01 | 26.324 |
| 3/12/2010 04:11:01 | 26.172 3/14/2010 17:24:00 | 27.5 3/13/2010 02:09:01 | 26.324 |
| 3/12/2010 04:31:01 | 26.172 3/14/2010 17:59:00 | 27.5 3/13/2010 02:29:01 | 26.324 |
| 3/12/2010 04:51:01 | 26.172 3/14/2010 18:34:00 | 27.5 3/13/2010 02:49:01 | 26.324 |
| 3/12/2010 05:11:01 | 26.172 3/14/2010 19:09:00 | 27.5 3/13/2010 03:09:01 | 26.324 |
| 3/12/2010 05:31:01 | 26.172 3/14/2010 19:44:00 | 27.5 3/13/2010 03:29:01 | 26.324 |
| 3/12/2010 05:51:01 | 26.172 3/14/2010 20:19:00 | 27.5 3/13/2010 03:49:01 | 26.324 |
| 3/12/2010 06:11:01 | 26.172 3/14/2010 20:54:00 | 27.5 3/13/2010 04:09:01 | 26.324 |
| 3/12/2010 06:31:01 | 26.172 3/14/2010 21:29:00 | 28.0 3/13/2010 04:29:01 | 26.324 |
| 3/12/2010 06:51:01 | 26.172 3/14/2010 22:04:00 | 27.5 3/13/2010 04:49:01 | 26.324 |
| 3/12/2010 07:11:01 | 26.172 3/14/2010 22:39:00 | 27.5 3/13/2010 05:09:01 | 26.324 |
| 3/12/2010 07:31:01 | 26.172 3/14/2010 23:14:00 | 27.5 3/13/2010 05:29:01 | 26.262 |
| 3/12/2010 07:51:01 | 26.172 3/14/2010 23:49:00 | 27.5 3/13/2010 05:49:01 | 26.324 |
| 3/12/2010 08:11:01 | 26.172 3/15/2010 00:24:00 | 27.5 3/13/2010 06:09:01 | 26.262 |
| 3/12/2010 08:31:01 | 26.172 3/15/2010 00:59:00 | 27.5 3/13/2010 06:29:01 | 26.262 |
| 3/12/2010 08:51:01 | 26.172 3/15/2010 01:34:00 | 27.5 3/13/2010 06:49:01 | 26.262 |
| 3/12/2010 09:11:01 | 26.172 3/15/2010 02:09:00 | 27.5 3/13/2010 07:09:01 | 26.262 |
| 3/12/2010 09:31:01 | 26.172 3/15/2010 02:44:00 | 27.5 3/13/2010 07:29:01 | 26.262 |
| 3/12/2010 09:51:01 | 26.172 3/15/2010 03:19:00 | 27.5 3/13/2010 07:49:01 | 26.262 |
| 3/12/2010 10:11:01 | 26.172 3/15/2010 03:54:00 | 27.5 3/13/2010 08:09:01 | 26.262 |
| 3/12/2010 10:31:01 | 26.172 3/15/2010 04:29:00 | 27.0 3/13/2010 08:29:01 | 26.262 |
| 3/12/2010 10:51:01 | 26.172 3/15/2010 05:04:00 | 27.0 3/13/2010 08:49:01 | 26.262 |
| 3/12/2010 11:11:01 | 26.172 3/15/2010 05:39:00 | 27.0 3/13/2010 09:09:01 | 26.262 |
| 3/12/2010 11:31:01 | 26.109 3/15/2010 06:14:00 | 27.0 3/13/2010 09:29:01 | 26.262 |
| 3/12/2010 11:51:01 | 26.109 3/15/2010 06:49:00 | 27.0 3/13/2010 09:49:01 | 26.262 |
| 3/12/2010 12:11:01 | 26.109 3/15/2010 07:24:00 | 27.0 3/13/2010 10:09:01 | 26.262 |
| 3/12/2010 12:31:01 | 26.109 3/15/2010 07:59:00 | 27.0 3/13/2010 10:29:01 | 26.262 |
| 3/12/2010 12:51:01 | 26.109 3/15/2010 08:34:00 | 27.0 3/13/2010 10:49:01 | 26.199 |
| 3/12/2010 13:11:01 | 26.109 3/15/2010 09:09:00 | 27.0 3/13/2010 11:09:01 | 26.199 |
| 3/12/2010 13:31:01 | 26.109 3/15/2010 09:44:00 | 27.0 3/13/2010 11:29:01 | 26.199 |
| 3/12/2010 13:51:01 | 26.109 3/15/2010 10:19:00 | 27.0 3/13/2010 11:49:01 | 26.199 |
| 3/12/2010 14:11:01 | 26.109 3/15/2010 10:54:00 | 27.0 3/13/2010 12:09:01 | 26.199 |
| 3/12/2010 14:31:01 | 26.109 3/15/2010 11:29:00 | 27.0 3/13/2010 12:29:01 | 26.199 |
| 3/12/2010 14:51:01 | 26.109 3/15/2010 12:04:00 | 27.0 3/13/2010 12:49:01 | 26.199 |
| 3/12/2010 15:11:01 | 26.109 3/15/2010 12:39:00 | 27.0 3/13/2010 13:09:01 | 26.199 |
| 3/12/2010 15:31:01 | 26.109 3/15/2010 13:14:00 | 27.0 3/13/2010 13:29:01 | 26.199 |

|                    |        |                    |      |                    |        |
|--------------------|--------|--------------------|------|--------------------|--------|
| 3/12/2010 15:51:01 | 26.109 | 3/15/2010 13:49:00 | 27.0 | 3/13/2010 13:49:01 | 26.199 |
| 3/12/2010 16:11:01 | 26.109 | 3/15/2010 14:24:00 | 27.0 | 3/13/2010 14:09:01 | 26.199 |
| 3/12/2010 16:31:01 | 26.109 | 3/15/2010 14:59:00 | 27.0 | 3/13/2010 14:29:01 | 26.199 |
| 3/12/2010 16:51:01 | 26.109 | 3/15/2010 15:34:00 | 27.0 | 3/13/2010 14:49:01 | 26.199 |
| 3/12/2010 17:11:01 | 26.047 | 3/15/2010 16:09:00 | 27.0 | 3/13/2010 15:09:01 | 26.199 |
| 3/12/2010 17:31:01 | 26.047 | 3/15/2010 16:44:00 | 27.0 | 3/13/2010 15:29:01 | 26.199 |
| 3/12/2010 17:51:01 | 26.047 | 3/15/2010 17:19:00 | 27.0 | 3/13/2010 15:49:01 | 26.199 |
| 3/12/2010 18:11:01 | 26.047 | 3/15/2010 17:54:00 | 27.0 | 3/13/2010 16:09:01 | 26.199 |
| 3/12/2010 18:31:01 | 26.047 | 3/15/2010 18:29:00 | 27.0 | 3/13/2010 16:29:01 | 26.199 |
| 3/12/2010 18:51:01 | 26.047 | 3/15/2010 19:04:00 | 27.5 | 3/13/2010 16:49:01 | 26.199 |
| 3/12/2010 19:11:01 | 26.047 | 3/15/2010 19:39:00 | 27.5 | 3/13/2010 17:09:01 | 26.199 |
| 3/12/2010 19:31:01 | 26.047 | 3/15/2010 20:14:00 | 28.0 | 3/13/2010 17:29:01 | 26.199 |
| 3/12/2010 19:51:01 | 26.047 | 3/15/2010 20:49:00 | 27.5 | 3/13/2010 17:49:01 | 26.199 |
| 3/12/2010 20:11:01 | 26.047 | 3/15/2010 21:24:00 | 27.5 | 3/13/2010 18:09:01 | 26.199 |
| 3/12/2010 20:31:01 | 26.047 | 3/15/2010 21:59:00 | 27.5 | 3/13/2010 18:29:01 | 26.199 |
| 3/12/2010 20:51:01 | 26.047 | 3/15/2010 22:34:00 | 27.5 | 3/13/2010 18:49:01 | 26.262 |
| 3/12/2010 21:11:01 | 26.047 | 3/15/2010 23:09:00 | 27.5 | 3/13/2010 19:09:01 | 26.262 |
| 3/12/2010 21:31:01 | 26.047 | 3/15/2010 23:44:00 | 27.0 | 3/13/2010 19:29:01 | 26.262 |
| 3/12/2010 21:51:01 | 26.047 | 3/16/2010 00:19:00 | 27.0 | 3/13/2010 19:49:01 | 26.262 |
| 3/12/2010 22:11:01 | 26.109 | 3/16/2010 00:54:00 | 27.0 | 3/13/2010 20:09:01 | 26.262 |
| 3/12/2010 22:31:01 | 26.109 | 3/16/2010 01:29:00 | 27.0 | 3/13/2010 20:29:01 | 26.262 |
| 3/12/2010 22:51:01 | 26.109 | 3/16/2010 02:04:00 | 27.0 | 3/13/2010 20:49:01 | 26.262 |
| 3/12/2010 23:11:01 | 26.109 | 3/16/2010 02:39:00 | 27.0 | 3/13/2010 21:09:01 | 26.262 |
| 3/12/2010 23:31:01 | 26.109 | 3/16/2010 03:14:00 | 27.5 | 3/13/2010 21:29:01 | 26.324 |
| 3/12/2010 23:51:01 | 26.109 | 3/16/2010 03:49:00 | 27.5 | 3/13/2010 21:49:01 | 26.324 |
| 3/13/2010 00:11:01 | 26.109 | 3/16/2010 04:24:00 | 27.0 | 3/13/2010 22:09:01 | 26.324 |
| 3/13/2010 00:31:01 | 26.109 | 3/16/2010 04:59:00 | 27.0 | 3/13/2010 22:29:01 | 26.324 |
| 3/13/2010 00:51:01 | 26.109 | 3/16/2010 05:34:00 | 27.0 | 3/13/2010 22:49:01 | 26.324 |
| 3/13/2010 01:11:01 | 26.109 | 3/16/2010 06:09:00 | 27.0 | 3/13/2010 23:09:01 | 26.324 |
| 3/13/2010 01:31:01 | 26.109 | 3/16/2010 06:44:00 | 27.0 | 3/13/2010 23:29:01 | 26.324 |
| 3/13/2010 01:51:01 | 26.109 | 3/16/2010 07:19:00 | 27.0 | 3/13/2010 23:49:01 | 26.324 |
| 3/13/2010 02:11:01 | 26.109 | 3/16/2010 07:54:00 | 27.0 | 3/14/2010 00:09:01 | 26.324 |
| 3/13/2010 02:31:01 | 26.109 | 3/16/2010 08:29:00 | 27.0 | 3/14/2010 00:29:01 | 26.324 |
| 3/13/2010 02:51:01 | 26.109 | 3/16/2010 09:04:00 | 27.0 | 3/14/2010 00:49:01 | 26.324 |
| 3/13/2010 03:11:01 | 26.109 | 3/16/2010 09:39:00 | 27.0 | 3/14/2010 01:09:01 | 26.324 |
| 3/13/2010 03:31:01 | 26.109 | 3/16/2010 10:14:00 | 27.0 | 3/14/2010 01:29:01 | 26.324 |
| 3/13/2010 03:51:01 | 26.109 | 3/16/2010 10:49:00 | 27.0 | 3/14/2010 01:49:01 | 26.324 |
| 3/13/2010 04:11:01 | 26.109 | 3/16/2010 11:24:00 | 27.0 | 3/14/2010 02:09:01 | 26.387 |
| 3/13/2010 04:31:01 | 26.109 | 3/16/2010 11:59:00 | 27.0 | 3/14/2010 02:29:01 | 26.324 |
| 3/13/2010 04:51:01 | 26.109 | 3/16/2010 12:34:00 | 27.0 | 3/14/2010 02:49:01 | 26.387 |
| 3/13/2010 05:11:01 | 26.109 | 3/16/2010 13:09:00 | 27.0 | 3/14/2010 03:09:01 | 26.387 |
| 3/13/2010 05:31:01 | 26.109 | 3/16/2010 13:44:00 | 27.0 | 3/14/2010 03:29:01 | 26.324 |
| 3/13/2010 05:51:01 | 26.047 | 3/16/2010 14:19:00 | 27.0 | 3/14/2010 03:49:01 | 26.324 |
| 3/13/2010 06:11:01 | 26.109 | 3/16/2010 14:54:00 | 27.0 | 3/14/2010 04:09:01 | 26.324 |
| 3/13/2010 06:31:01 | 26.109 | 3/16/2010 15:29:00 | 27.0 | 3/14/2010 04:29:01 | 26.324 |
| 3/13/2010 06:51:01 | 26.047 | 3/16/2010 16:04:00 | 27.0 | 3/14/2010 04:49:01 | 26.324 |
| 3/13/2010 07:11:01 | 26.047 | 3/16/2010 16:39:00 | 27.0 | 3/14/2010 05:09:01 | 26.324 |
| 3/13/2010 07:31:01 | 26.047 | 3/16/2010 17:14:00 | 27.0 | 3/14/2010 05:29:01 | 26.324 |
| 3/13/2010 07:51:01 | 26.047 | 3/16/2010 17:49:00 | 27.0 | 3/14/2010 05:49:01 | 26.324 |
| 3/13/2010 08:11:01 | 26.047 | 3/16/2010 18:24:00 | 27.5 | 3/14/2010 06:09:01 | 26.324 |

|                    |        |                    |      |                    |        |
|--------------------|--------|--------------------|------|--------------------|--------|
| 3/13/2010 08:31:01 | 26.047 | 3/16/2010 18:59:00 | 27.5 | 3/14/2010 06:29:01 | 26.324 |
| 3/13/2010 08:51:01 | 26.047 | 3/16/2010 19:34:00 | 27.5 | 3/14/2010 06:49:01 | 26.324 |
| 3/13/2010 09:11:01 | 26.047 | 3/16/2010 20:09:00 | 27.5 | 3/14/2010 07:09:01 | 26.324 |
| 3/13/2010 09:31:01 | 26.047 | 3/16/2010 20:44:00 | 27.5 | 3/14/2010 07:29:01 | 26.324 |
| 3/13/2010 09:51:01 | 26.047 | 3/16/2010 21:19:00 | 27.5 | 3/14/2010 07:49:01 | 26.324 |
| 3/13/2010 10:11:01 | 26.047 | 3/16/2010 21:54:00 | 27.5 | 3/14/2010 08:09:01 | 26.324 |
| 3/13/2010 10:31:01 | 26.047 | 3/16/2010 22:29:00 | 27.5 | 3/14/2010 08:29:01 | 26.324 |
| 3/13/2010 10:51:01 | 26.047 | 3/16/2010 23:04:00 | 27.5 | 3/14/2010 08:49:01 | 26.324 |
| 3/13/2010 11:11:01 | 26.047 | 3/16/2010 23:39:00 | 27.5 | 3/14/2010 09:09:01 | 26.324 |
| 3/13/2010 11:31:01 | 26.047 | 3/17/2010 00:14:00 | 27.5 | 3/14/2010 09:29:01 | 26.324 |
| 3/13/2010 11:51:01 | 26.047 | 3/17/2010 00:49:00 | 27.0 | 3/14/2010 09:49:01 | 26.324 |
| 3/13/2010 12:11:01 | 26.047 | 3/17/2010 01:24:00 | 27.0 | 3/14/2010 10:09:01 | 26.262 |
| 3/13/2010 12:31:01 | 26.047 | 3/17/2010 01:59:00 | 27.0 | 3/14/2010 10:29:01 | 26.262 |
| 3/13/2010 12:51:01 | 26.047 | 3/17/2010 02:34:00 | 27.0 | 3/14/2010 10:49:01 | 26.262 |
| 3/13/2010 13:11:01 | 26.047 | 3/17/2010 03:09:00 | 27.0 | 3/14/2010 11:09:01 | 26.262 |
| 3/13/2010 13:31:01 | 26.047 | 3/17/2010 03:44:00 | 27.0 | 3/14/2010 11:29:01 | 26.262 |
| 3/13/2010 13:51:01 | 25.984 | 3/17/2010 04:19:00 | 27.0 | 3/14/2010 11:49:01 | 26.262 |
| 3/13/2010 14:11:01 | 25.984 | 3/17/2010 04:54:00 | 27.0 | 3/14/2010 12:09:01 | 26.262 |
| 3/13/2010 14:31:01 | 25.984 | 3/17/2010 05:29:00 | 27.0 | 3/14/2010 12:29:01 | 26.262 |
| 3/13/2010 14:51:01 | 25.984 | 3/17/2010 06:04:00 | 27.0 | 3/14/2010 12:49:01 | 26.262 |
| 3/13/2010 15:11:01 | 25.984 | 3/17/2010 06:39:00 | 27.0 | 3/14/2010 13:09:01 | 26.262 |
| 3/13/2010 15:31:01 | 25.984 | 3/17/2010 07:14:00 | 27.0 | 3/14/2010 13:29:01 | 26.262 |
| 3/13/2010 15:51:01 | 25.984 | 3/17/2010 07:49:00 | 27.0 | 3/14/2010 13:49:01 | 26.262 |
| 3/13/2010 16:11:01 | 25.984 | 3/17/2010 08:24:00 | 27.0 | 3/14/2010 14:09:01 | 26.262 |
| 3/13/2010 16:31:01 | 25.984 | 3/17/2010 08:59:00 | 27.0 | 3/14/2010 14:29:01 | 26.262 |
| 3/13/2010 16:51:01 | 25.984 | 3/17/2010 09:34:00 | 27.0 | 3/14/2010 14:49:01 | 26.262 |
| 3/13/2010 17:11:01 | 25.984 | 3/17/2010 10:09:00 | 27.0 | 3/14/2010 15:09:01 | 26.262 |
| 3/13/2010 17:31:01 | 25.984 | 3/17/2010 10:44:00 | 27.0 | 3/14/2010 15:29:01 | 26.262 |
| 3/13/2010 17:51:01 | 25.984 | 3/17/2010 11:19:00 | 27.0 | 3/14/2010 15:49:01 | 26.262 |
| 3/13/2010 18:11:01 | 25.984 | 3/17/2010 11:54:00 | 27.0 | 3/14/2010 16:09:01 | 26.262 |
| 3/13/2010 18:31:01 | 25.984 | 3/17/2010 12:29:00 | 27.0 | 3/14/2010 16:29:01 | 26.262 |
| 3/13/2010 18:51:01 | 25.984 | 3/17/2010 13:04:00 | 27.0 | 3/14/2010 16:49:01 | 26.262 |
| 3/13/2010 19:11:01 | 25.984 | 3/17/2010 13:39:00 | 27.0 | 3/14/2010 17:09:01 | 26.262 |
| 3/13/2010 19:31:01 | 25.984 | 3/17/2010 14:14:00 | 27.0 | 3/14/2010 17:29:01 | 26.262 |
| 3/13/2010 19:51:01 | 26.047 | 3/17/2010 14:49:00 | 27.5 | 3/14/2010 17:49:01 | 26.262 |
| 3/13/2010 20:11:01 | 26.047 | 3/17/2010 15:24:00 | 27.5 | 3/14/2010 18:09:01 | 26.262 |
| 3/13/2010 20:31:01 | 26.047 | 3/17/2010 15:59:00 | 27.0 | 3/14/2010 18:29:01 | 26.262 |
| 3/13/2010 20:51:01 | 26.047 | 3/17/2010 16:34:00 | 27.0 | 3/14/2010 18:49:01 | 26.262 |
| 3/13/2010 21:11:01 | 26.047 | 3/17/2010 17:09:00 | 27.5 | 3/14/2010 19:09:01 | 26.262 |
| 3/13/2010 21:31:01 | 26.047 | 3/17/2010 17:44:00 | 27.5 | 3/14/2010 19:29:01 | 26.262 |
| 3/13/2010 21:51:01 | 26.047 | 3/17/2010 18:19:00 | 27.5 | 3/14/2010 19:49:01 | 26.262 |
| 3/13/2010 22:11:01 | 26.047 | 3/17/2010 18:54:00 | 27.5 | 3/14/2010 20:09:01 | 26.262 |
| 3/13/2010 22:31:01 | 26.047 | 3/17/2010 19:29:00 | 27.5 | 3/14/2010 20:29:01 | 26.262 |
| 3/13/2010 22:51:01 | 26.047 | 3/17/2010 20:04:00 | 27.5 | 3/14/2010 20:49:01 | 26.262 |
| 3/13/2010 23:11:01 | 26.047 | 3/17/2010 20:39:00 | 27.5 | 3/14/2010 21:09:01 | 26.262 |
| 3/13/2010 23:31:01 | 26.047 | 3/17/2010 21:14:00 | 27.5 | 3/14/2010 21:29:01 | 26.262 |
| 3/13/2010 23:51:01 | 26.047 | 3/17/2010 21:49:00 | 27.5 | 3/14/2010 21:49:01 | 26.262 |
| 3/14/2010 00:11:01 | 26.047 | 3/17/2010 22:24:00 | 27.5 | 3/14/2010 22:09:01 | 26.262 |
| 3/14/2010 00:31:01 | 26.047 | 3/17/2010 22:59:00 | 27.5 | 3/14/2010 22:29:01 | 26.262 |
| 3/14/2010 00:51:01 | 26.047 | 3/17/2010 23:34:00 | 27.5 | 3/14/2010 22:49:01 | 26.262 |

|                    |                           |                         |        |
|--------------------|---------------------------|-------------------------|--------|
| 3/14/2010 01:11:01 | 26.047 3/18/2010 00:09:00 | 27.5 3/14/2010 23:09:01 | 26.262 |
| 3/14/2010 01:31:01 | 26.047 3/18/2010 00:44:00 | 27.0 3/14/2010 23:29:01 | 26.262 |
| 3/14/2010 01:51:01 | 26.047 3/18/2010 01:19:00 | 27.0 3/14/2010 23:49:01 | 26.262 |
| 3/14/2010 02:11:01 | 26.047 3/18/2010 01:54:00 | 27.0 3/15/2010 00:09:01 | 26.262 |
| 3/14/2010 02:31:01 | 26.047 3/18/2010 02:29:00 | 27.0 3/15/2010 00:29:01 | 26.262 |
| 3/14/2010 02:51:01 | 26.047 3/18/2010 03:04:00 | 27.0 3/15/2010 00:49:01 | 26.262 |
| 3/14/2010 03:11:01 | 26.047 3/18/2010 03:39:00 | 27.0 3/15/2010 01:09:01 | 26.262 |
| 3/14/2010 03:31:01 | 26.047 3/18/2010 04:14:00 | 27.0 3/15/2010 01:29:01 | 26.262 |
| 3/14/2010 03:51:01 | 26.109 3/18/2010 04:49:00 | 27.0 3/15/2010 01:49:01 | 26.262 |
| 3/14/2010 04:11:01 | 26.047 3/18/2010 05:24:00 | 27.0 3/15/2010 02:09:01 | 26.262 |
| 3/14/2010 04:31:01 | 26.047 3/18/2010 05:59:00 | 27.0 3/15/2010 02:29:01 | 26.262 |
| 3/14/2010 04:51:01 | 26.109 3/18/2010 06:34:00 | 27.0 3/15/2010 02:49:01 | 26.262 |
| 3/14/2010 05:11:01 | 26.109 3/18/2010 07:09:00 | 27.0 3/15/2010 03:09:01 | 26.262 |
| 3/14/2010 05:31:01 | 26.047 3/18/2010 07:44:00 | 27.0 3/15/2010 03:29:01 | 26.199 |
| 3/14/2010 05:51:01 | 26.047 3/18/2010 08:19:00 | 27.0 3/15/2010 03:49:01 | 26.199 |
| 3/14/2010 06:11:01 | 26.047 3/18/2010 08:54:00 | 27.0 3/15/2010 04:09:01 | 26.199 |
| 3/14/2010 06:31:01 | 26.047 3/18/2010 09:29:00 | 27.0 3/15/2010 04:29:01 | 26.199 |
| 3/14/2010 06:51:01 | 26.047 3/18/2010 10:04:00 | 27.0 3/15/2010 04:49:01 | 26.199 |
| 3/14/2010 07:11:01 | 26.047 3/18/2010 10:39:00 | 27.0 3/15/2010 05:09:01 | 26.199 |
| 3/14/2010 07:31:01 | 26.047 3/18/2010 11:14:00 | 27.0 3/15/2010 05:29:01 | 26.199 |
| 3/14/2010 07:51:01 | 26.047 3/18/2010 11:49:00 | 27.0 3/15/2010 05:49:01 | 26.199 |
| 3/14/2010 08:11:01 | 26.047 3/18/2010 12:24:00 | 27.0 3/15/2010 06:09:01 | 26.199 |
| 3/14/2010 08:31:01 | 26.047 3/18/2010 12:59:00 | 27.0 3/15/2010 06:29:01 | 26.199 |
| 3/14/2010 08:51:01 | 26.047 3/18/2010 13:34:00 | 27.0 3/15/2010 06:49:01 | 26.199 |
| 3/14/2010 09:11:01 | 26.047 3/18/2010 14:09:00 | 27.0 3/15/2010 07:09:01 | 26.137 |
| 3/14/2010 09:31:01 | 26.047 3/18/2010 14:44:00 | 27.0 3/15/2010 07:29:01 | 26.137 |
| 3/14/2010 09:51:01 | 26.047 3/18/2010 15:19:00 | 27.0 3/15/2010 07:49:01 | 26.137 |
| 3/14/2010 10:11:01 | 26.047 3/18/2010 15:54:00 | 27.0 3/15/2010 08:09:01 | 26.137 |
| 3/14/2010 10:31:01 | 26.047 3/18/2010 16:29:00 | 27.0 3/15/2010 08:29:01 | 26.137 |
| 3/14/2010 10:51:01 | 26.047 3/18/2010 17:04:00 | 27.0 3/15/2010 08:49:01 | 26.137 |
| 3/14/2010 11:11:01 | 26.047 3/18/2010 17:39:00 | 27.5 3/15/2010 09:09:01 | 26.137 |
| 3/14/2010 11:31:01 | 26.047 3/18/2010 18:14:00 | 27.5 3/15/2010 09:29:01 | 26.074 |
| 3/14/2010 11:51:01 | 26.047 3/18/2010 18:49:00 | 27.5 3/15/2010 09:49:01 | 26.074 |
| 3/14/2010 12:11:01 | 26.047 3/18/2010 19:24:00 | 27.5 3/15/2010 10:09:01 | 26.074 |
| 3/14/2010 12:31:01 | 26.047 3/18/2010 19:59:00 | 27.5 3/15/2010 10:29:01 | 26.074 |
| 3/14/2010 12:51:01 | 26.047 3/18/2010 20:34:00 | 27.5 3/15/2010 10:49:01 | 26.074 |
| 3/14/2010 13:11:01 | 26.047 3/18/2010 21:09:00 | 27.5 3/15/2010 11:09:01 | 26.074 |
| 3/14/2010 13:31:01 | 26.047 3/18/2010 21:44:00 | 27.5 3/15/2010 11:29:01 | 26.074 |
| 3/14/2010 13:51:01 | 26.047 3/18/2010 22:19:00 | 27.5 3/15/2010 11:49:01 | 26.074 |
| 3/14/2010 14:11:01 | 26.047 3/18/2010 22:54:00 | 27.5 3/15/2010 12:09:01 | 26.012 |
| 3/14/2010 14:31:01 | 26.047 3/18/2010 23:29:00 | 27.5 3/15/2010 12:29:01 | 26.012 |
| 3/14/2010 14:51:01 | 26.047 3/19/2010 00:04:00 | 27.5 3/15/2010 12:49:01 | 26.012 |
| 3/14/2010 15:11:01 | 26.047 3/19/2010 00:39:00 | 27.0 3/15/2010 13:09:01 | 26.012 |
| 3/14/2010 15:31:01 | 26.047 3/19/2010 01:14:00 | 27.0 3/15/2010 13:29:01 | 26.012 |
| 3/14/2010 15:51:01 | 26.047 3/19/2010 01:49:00 | 27.0 3/15/2010 13:49:01 | 26.012 |
| 3/14/2010 16:11:01 | 26.047 3/19/2010 02:24:00 | 27.0 3/15/2010 14:09:01 | 26.012 |
| 3/14/2010 16:31:01 | 26.047 3/19/2010 02:59:00 | 27.0 3/15/2010 14:29:01 | 26.012 |
| 3/14/2010 16:51:01 | 26.047 3/19/2010 03:34:00 | 27.0 3/15/2010 14:49:01 | 26.012 |
| 3/14/2010 17:11:01 | 26.047 3/19/2010 04:09:00 | 27.0 3/15/2010 15:09:01 | 26.012 |
| 3/14/2010 17:31:01 | 26.047 3/19/2010 04:44:00 | 27.0 3/15/2010 15:29:01 | 26.012 |

|                    |                           |                         |        |
|--------------------|---------------------------|-------------------------|--------|
| 3/14/2010 17:51:01 | 26.047 3/19/2010 05:19:00 | 27.0 3/15/2010 15:49:01 | 26.012 |
| 3/14/2010 18:11:01 | 26.047 3/19/2010 05:54:00 | 27.0 3/15/2010 16:09:01 | 26.012 |
| 3/14/2010 18:31:01 | 26.047 3/19/2010 06:29:00 | 27.0 3/15/2010 16:29:01 | 26.012 |
| 3/14/2010 18:51:01 | 26.047 3/19/2010 07:04:00 | 27.0 3/15/2010 16:49:01 | 26.012 |
| 3/14/2010 19:11:01 | 26.047 3/19/2010 07:39:00 | 27.0 3/15/2010 17:09:01 | 26.012 |
| 3/14/2010 19:31:01 | 26.047 3/19/2010 08:14:00 | 27.0 3/15/2010 17:29:01 | 26.012 |
| 3/14/2010 19:51:01 | 26.047 3/19/2010 08:49:00 | 27.0 3/15/2010 17:49:01 | 26.012 |
| 3/14/2010 20:11:01 | 26.047 3/19/2010 09:24:00 | 27.0 3/15/2010 18:09:01 | 26.012 |
| 3/14/2010 20:31:01 | 26.047 3/19/2010 09:59:00 | 27.0 3/15/2010 18:29:01 | 26.012 |
| 3/14/2010 20:51:01 | 26.047 3/19/2010 10:34:00 | 27.0 3/15/2010 18:49:01 | 26.012 |
| 3/14/2010 21:11:01 | 26.047 3/19/2010 11:09:00 | 27.0 3/15/2010 19:09:01 | 26.012 |
| 3/14/2010 21:31:01 | 26.047 3/19/2010 11:44:00 | 27.0 3/15/2010 19:29:01 | 26.012 |
| 3/14/2010 21:51:01 | 26.047 3/19/2010 12:19:00 | 27.0 3/15/2010 19:49:01 | 26.012 |
| 3/14/2010 22:11:01 | 26.047 3/19/2010 12:54:00 | 27.0 3/15/2010 20:09:01 | 26.012 |
| 3/14/2010 22:31:01 | 26.047 3/19/2010 13:29:00 | 27.0 3/15/2010 20:29:01 | 26.012 |
| 3/14/2010 22:51:01 | 26.047 3/19/2010 14:04:00 | 27.0 3/15/2010 20:49:01 | 26.012 |
| 3/14/2010 23:11:01 | 26.047 3/19/2010 14:39:00 | 27.0 3/15/2010 21:09:01 | 26.012 |
| 3/14/2010 23:31:01 | 26.047 3/19/2010 15:14:00 | 27.0 3/15/2010 21:29:01 | 26.012 |
| 3/14/2010 23:51:01 | 26.047 3/19/2010 15:49:00 | 27.0 3/15/2010 21:49:01 | 26.012 |
| 3/15/2010 00:11:01 | 26.047 3/19/2010 16:24:00 | 27.0 3/15/2010 22:09:01 | 26.012 |
| 3/15/2010 00:31:01 | 26.047 3/19/2010 16:59:00 | 27.5 3/15/2010 22:29:01 | 26.012 |
| 3/15/2010 00:51:01 | 26.047 3/19/2010 17:34:00 | 28.0 3/15/2010 22:49:01 | 26.012 |
| 3/15/2010 01:11:01 | 26.047 3/19/2010 18:09:00 | 27.5 3/15/2010 23:09:01 | 26.012 |
| 3/15/2010 01:31:01 | 26.047 3/19/2010 18:44:00 | 27.5 3/15/2010 23:29:01 | 26.012 |
| 3/15/2010 01:51:01 | 26.047 3/19/2010 19:19:00 | 27.5 3/15/2010 23:49:01 | 26.012 |
| 3/15/2010 02:11:01 | 26.047 3/19/2010 19:54:00 | 27.5 3/16/2010 00:09:01 | 26.012 |
| 3/15/2010 02:31:01 | 26.047 3/19/2010 20:29:00 | 27.5 3/16/2010 00:29:01 | 26.012 |
| 3/15/2010 02:51:01 | 26.047 3/19/2010 21:04:00 | 27.5 3/16/2010 00:49:01 | 26.012 |
| 3/15/2010 03:11:01 | 26.047 3/19/2010 21:39:00 | 27.5 3/16/2010 01:09:01 | 25.949 |
| 3/15/2010 03:31:01 | 26.047 3/19/2010 22:14:00 | 27.5 3/16/2010 01:29:01 | 26.012 |
| 3/15/2010 03:51:01 | 26.047 3/19/2010 22:49:00 | 27.5 3/16/2010 01:49:01 | 25.949 |
| 3/15/2010 04:11:01 | 26.047 3/19/2010 23:24:00 | 27.5 3/16/2010 02:09:01 | 25.949 |
| 3/15/2010 04:31:01 | 26.047 3/19/2010 23:59:00 | 27.5 3/16/2010 02:29:01 | 25.949 |
| 3/15/2010 04:51:01 | 26.047 3/20/2010 00:34:00 | 27.5 3/16/2010 02:49:01 | 25.949 |
| 3/15/2010 05:11:01 | 26.047 3/20/2010 01:09:00 | 27.5 3/16/2010 03:09:01 | 25.949 |
| 3/15/2010 05:31:01 | 26.047 3/20/2010 01:44:00 | 27.5 3/16/2010 03:29:01 | 25.949 |
| 3/15/2010 05:51:01 | 26.047 3/20/2010 02:19:00 | 27.0 3/16/2010 03:49:01 | 25.949 |
| 3/15/2010 06:11:01 | 26.047 3/20/2010 02:54:00 | 27.0 3/16/2010 04:09:01 | 25.949 |
| 3/15/2010 06:31:01 | 26.047 3/20/2010 03:29:00 | 27.0 3/16/2010 04:29:01 | 25.949 |
| 3/15/2010 06:51:01 | 26.047 3/20/2010 04:04:00 | 27.5 3/16/2010 04:49:01 | 25.949 |
| 3/15/2010 07:11:01 | 26.047 3/20/2010 04:39:00 | 27.5 3/16/2010 05:09:01 | 25.949 |
| 3/15/2010 07:31:01 | 25.984 3/20/2010 05:14:00 | 27.5 3/16/2010 05:29:01 | 25.949 |
| 3/15/2010 07:51:01 | 25.984 3/20/2010 05:49:00 | 27.5 3/16/2010 05:49:01 | 25.949 |
| 3/15/2010 08:11:01 | 25.984 3/20/2010 06:24:00 | 27.5 3/16/2010 06:09:01 | 25.949 |
| 3/15/2010 08:31:01 | 25.984 3/20/2010 06:59:00 | 27.5 3/16/2010 06:29:01 | 25.949 |
| 3/15/2010 08:51:01 | 25.984 3/20/2010 07:34:00 | 27.0 3/16/2010 06:49:01 | 25.949 |
| 3/15/2010 09:11:01 | 25.984 3/20/2010 08:09:00 | 27.0 3/16/2010 07:09:01 | 25.887 |
| 3/15/2010 09:31:01 | 25.984 3/20/2010 08:44:00 | 27.0 3/16/2010 07:29:01 | 25.887 |
| 3/15/2010 09:51:01 | 25.984 3/20/2010 09:19:00 | 27.0 3/16/2010 07:49:01 | 25.887 |
| 3/15/2010 10:11:01 | 25.984 3/20/2010 09:54:00 | 27.0 3/16/2010 08:09:01 | 25.887 |

|                    |        |                    |      |                    |        |
|--------------------|--------|--------------------|------|--------------------|--------|
| 3/15/2010 10:31:01 | 25.984 | 3/20/2010 10:29:00 | 27.0 | 3/16/2010 08:29:01 | 25.887 |
| 3/15/2010 10:51:01 | 25.984 | 3/20/2010 11:04:00 | 27.0 | 3/16/2010 08:49:01 | 25.887 |
| 3/15/2010 11:11:01 | 25.984 | 3/20/2010 11:39:00 | 27.0 | 3/16/2010 09:09:01 | 25.887 |
| 3/15/2010 11:31:01 | 25.984 | 3/20/2010 12:14:00 | 27.0 | 3/16/2010 09:29:01 | 25.887 |
| 3/15/2010 11:51:01 | 25.922 | 3/20/2010 12:49:00 | 27.0 | 3/16/2010 09:49:01 | 25.887 |
| 3/15/2010 12:11:01 | 25.922 | 3/20/2010 13:24:00 | 27.0 | 3/16/2010 10:09:01 | 25.887 |
| 3/15/2010 12:31:01 | 25.922 | 3/20/2010 13:59:00 | 27.0 | 3/16/2010 10:29:01 | 25.887 |
| 3/15/2010 12:51:01 | 25.922 | 3/20/2010 14:34:00 | 27.0 | 3/16/2010 10:49:01 | 25.887 |
| 3/15/2010 13:11:01 | 25.922 | 3/20/2010 15:09:00 | 27.0 | 3/16/2010 11:09:01 | 25.887 |
| 3/15/2010 13:31:01 | 25.922 | 3/20/2010 15:44:00 | 27.0 | 3/16/2010 11:29:01 | 25.887 |
| 3/15/2010 13:51:01 | 25.922 | 3/20/2010 16:19:00 | 27.0 | 3/16/2010 11:49:01 | 25.824 |
| 3/15/2010 14:11:01 | 25.922 | 3/20/2010 16:54:00 | 27.0 | 3/16/2010 12:09:01 | 25.824 |
| 3/15/2010 14:31:01 | 25.922 | 3/20/2010 17:29:00 | 27.5 | 3/16/2010 12:29:01 | 25.824 |
| 3/15/2010 14:51:01 | 25.922 | 3/20/2010 18:04:00 | 27.5 | 3/16/2010 12:49:01 | 25.824 |
| 3/15/2010 15:11:01 | 25.922 | 3/20/2010 18:39:00 | 27.5 | 3/16/2010 13:09:01 | 25.824 |
| 3/15/2010 15:31:01 | 25.922 | 3/20/2010 19:14:00 | 27.5 | 3/16/2010 13:29:01 | 25.824 |
| 3/15/2010 15:51:01 | 25.922 | 3/20/2010 19:49:00 | 27.5 | 3/16/2010 13:49:01 | 25.824 |
| 3/15/2010 16:11:01 | 25.922 | 3/20/2010 20:24:00 | 27.5 | 3/16/2010 14:09:01 | 25.824 |
| 3/15/2010 16:31:01 | 25.922 | 3/20/2010 20:59:00 | 27.5 | 3/16/2010 14:29:01 | 25.824 |
| 3/15/2010 16:51:01 | 25.922 | 3/20/2010 21:34:00 | 27.5 | 3/16/2010 14:49:01 | 25.824 |
| 3/15/2010 17:11:01 | 25.922 | 3/20/2010 22:09:00 | 27.5 | 3/16/2010 15:09:01 | 25.824 |
| 3/15/2010 17:31:01 | 25.922 | 3/20/2010 22:44:00 | 27.5 | 3/16/2010 15:29:01 | 25.824 |
| 3/15/2010 17:51:01 | 25.922 | 3/20/2010 23:19:00 | 27.5 | 3/16/2010 15:49:01 | 25.824 |
| 3/15/2010 18:11:01 | 25.922 | 3/20/2010 23:54:00 | 27.0 | 3/16/2010 16:09:01 | 25.824 |
| 3/15/2010 18:31:01 | 25.922 | 3/21/2010 00:29:00 | 27.0 | 3/16/2010 16:29:01 | 25.887 |
| 3/15/2010 18:51:01 | 25.922 | 3/21/2010 01:04:00 | 27.0 | 3/16/2010 16:49:01 | 25.887 |
| 3/15/2010 19:11:01 | 25.922 | 3/21/2010 01:39:00 | 27.0 | 3/16/2010 17:09:01 | 25.887 |
| 3/15/2010 19:31:01 | 25.859 | 3/21/2010 02:14:00 | 27.0 | 3/16/2010 17:29:01 | 25.887 |
| 3/15/2010 19:51:01 | 25.922 | 3/21/2010 02:49:00 | 27.0 | 3/16/2010 17:49:01 | 25.887 |
| 3/15/2010 20:11:01 | 25.859 | 3/21/2010 03:24:00 | 27.0 | 3/16/2010 18:09:01 | 25.887 |
| 3/15/2010 20:31:01 | 25.859 | 3/21/2010 03:59:00 | 27.0 | 3/16/2010 18:29:01 | 25.887 |
| 3/15/2010 20:51:01 | 25.859 | 3/21/2010 04:34:00 | 27.0 | 3/16/2010 18:49:01 | 25.887 |
| 3/15/2010 21:11:01 | 25.922 | 3/21/2010 05:09:00 | 27.0 | 3/16/2010 19:09:01 | 25.887 |
| 3/15/2010 21:31:01 | 25.859 | 3/21/2010 05:44:00 | 27.0 | 3/16/2010 19:29:01 | 25.949 |
| 3/15/2010 21:51:01 | 25.922 | 3/21/2010 06:19:00 | 27.0 | 3/16/2010 19:49:01 | 25.949 |
| 3/15/2010 22:11:01 | 25.859 | 3/21/2010 06:54:00 | 27.0 | 3/16/2010 20:09:01 | 25.949 |
| 3/15/2010 22:31:01 | 25.859 | 3/21/2010 07:29:00 | 27.0 | 3/16/2010 20:29:01 | 25.949 |
| 3/15/2010 22:51:01 | 25.859 | 3/21/2010 08:04:00 | 27.0 | 3/16/2010 20:49:01 | 25.949 |
| 3/15/2010 23:11:01 | 25.859 | 3/21/2010 08:39:00 | 27.0 | 3/16/2010 21:09:01 | 25.949 |
| 3/15/2010 23:31:01 | 25.859 | 3/21/2010 09:14:00 | 27.0 | 3/16/2010 21:29:01 | 25.949 |
| 3/15/2010 23:51:01 | 25.859 | 3/21/2010 09:49:00 | 27.0 | 3/16/2010 21:49:01 | 25.949 |
| 3/16/2010 00:11:01 | 25.859 | 3/21/2010 10:24:00 | 27.0 | 3/16/2010 22:09:01 | 26.012 |
| 3/16/2010 00:31:01 | 25.859 | 3/21/2010 10:59:00 | 27.0 | 3/16/2010 22:29:01 | 26.012 |
| 3/16/2010 00:51:01 | 25.859 | 3/21/2010 11:34:00 | 27.0 | 3/16/2010 22:49:01 | 26.012 |
| 3/16/2010 01:11:01 | 25.859 | 3/21/2010 12:09:00 | 27.0 | 3/16/2010 23:09:01 | 26.012 |
| 3/16/2010 01:31:01 | 25.859 | 3/21/2010 12:44:00 | 27.0 | 3/16/2010 23:29:01 | 26.012 |
| 3/16/2010 01:51:01 | 25.859 | 3/21/2010 13:19:00 | 27.0 | 3/16/2010 23:49:01 | 26.012 |
| 3/16/2010 02:11:01 | 25.859 | 3/21/2010 13:54:00 | 27.0 | 3/17/2010 00:09:01 | 26.012 |
| 3/16/2010 02:31:01 | 25.859 | 3/21/2010 14:29:00 | 27.0 | 3/17/2010 00:29:01 | 26.012 |
| 3/16/2010 02:51:01 | 25.859 | 3/21/2010 15:04:00 | 27.0 | 3/17/2010 00:49:01 | 26.012 |

|                    |        |                    |      |                    |        |
|--------------------|--------|--------------------|------|--------------------|--------|
| 3/16/2010 03:11:01 | 25.859 | 3/21/2010 15:39:00 | 27.0 | 3/17/2010 01:09:01 | 26.012 |
| 3/16/2010 03:31:01 | 25.859 | 3/21/2010 16:14:00 | 27.0 | 3/17/2010 01:29:01 | 26.012 |
| 3/16/2010 03:51:01 | 25.859 | 3/21/2010 16:49:00 | 27.0 | 3/17/2010 01:49:01 | 26.012 |
| 3/16/2010 04:11:01 | 25.859 | 3/21/2010 17:24:00 | 27.0 | 3/17/2010 02:09:01 | 26.012 |
| 3/16/2010 04:31:01 | 25.859 | 3/21/2010 17:59:00 | 27.0 | 3/17/2010 02:29:01 | 26.012 |
| 3/16/2010 04:51:01 | 25.859 | 3/21/2010 18:34:00 | 27.5 | 3/17/2010 02:49:01 | 26.012 |
| 3/16/2010 05:11:01 | 25.859 | 3/21/2010 19:09:00 | 27.5 | 3/17/2010 03:09:01 | 26.012 |
| 3/16/2010 05:31:01 | 25.859 | 3/21/2010 19:44:00 | 27.5 | 3/17/2010 03:29:01 | 26.012 |
| 3/16/2010 05:51:01 | 25.859 | 3/21/2010 20:19:00 | 27.5 | 3/17/2010 03:49:01 | 26.012 |
| 3/16/2010 06:11:01 | 25.859 | 3/21/2010 20:54:00 | 27.5 | 3/17/2010 04:09:01 | 26.012 |
| 3/16/2010 06:31:01 | 25.859 | 3/21/2010 21:29:00 | 27.5 | 3/17/2010 04:29:01 | 26.012 |
| 3/16/2010 06:51:01 | 25.859 | 3/21/2010 22:04:00 | 27.5 | 3/17/2010 04:49:01 | 26.012 |
| 3/16/2010 07:11:01 | 25.859 | 3/21/2010 22:39:00 | 27.5 | 3/17/2010 05:09:01 | 26.012 |
| 3/16/2010 07:31:01 | 25.859 | 3/21/2010 23:14:00 | 27.5 | 3/17/2010 05:29:01 | 26.012 |
| 3/16/2010 07:51:01 | 25.859 | 3/21/2010 23:49:00 | 27.5 | 3/17/2010 05:49:01 | 26.012 |
| 3/16/2010 08:11:01 | 25.859 | 3/22/2010 00:24:00 | 27.5 | 3/17/2010 06:09:01 | 26.012 |
| 3/16/2010 08:31:01 | 25.859 | 3/22/2010 00:59:00 | 27.5 | 3/17/2010 06:29:01 | 26.012 |
| 3/16/2010 08:51:01 | 25.859 | 3/22/2010 01:34:00 | 27.5 | 3/17/2010 06:49:01 | 26.012 |
| 3/16/2010 09:11:01 | 25.859 | 3/22/2010 02:09:00 | 27.5 | 3/17/2010 07:09:01 | 26.012 |
| 3/16/2010 09:31:01 | 25.797 | 3/22/2010 02:44:00 | 27.0 | 3/17/2010 07:29:01 | 26.012 |
| 3/16/2010 09:51:01 | 25.797 | 3/22/2010 03:19:00 | 27.0 | 3/17/2010 07:49:01 | 26.012 |
| 3/16/2010 10:11:01 | 25.797 | 3/22/2010 03:54:00 | 27.0 | 3/17/2010 08:09:01 | 26.012 |
| 3/16/2010 10:31:01 | 25.797 | 3/22/2010 04:29:00 | 27.0 | 3/17/2010 08:29:01 | 26.012 |
| 3/16/2010 10:51:01 | 25.797 | 3/22/2010 05:04:00 | 27.0 | 3/17/2010 08:49:01 | 25.949 |
| 3/16/2010 11:11:01 | 25.797 | 3/22/2010 05:39:00 | 27.0 | 3/17/2010 09:09:01 | 25.949 |
| 3/16/2010 11:31:01 | 25.797 | 3/22/2010 06:14:00 | 27.0 | 3/17/2010 09:29:01 | 25.949 |
| 3/16/2010 11:51:01 | 25.797 | 3/22/2010 06:49:00 | 27.0 | 3/17/2010 09:49:01 | 25.949 |
| 3/16/2010 12:11:01 | 25.797 | 3/22/2010 07:24:00 | 27.0 | 3/17/2010 10:09:01 | 25.949 |
| 3/16/2010 12:31:01 | 25.797 | 3/22/2010 07:59:00 | 27.0 | 3/17/2010 10:29:01 | 25.949 |
| 3/16/2010 12:51:01 | 25.797 | 3/22/2010 08:34:00 | 27.0 | 3/17/2010 10:49:01 | 25.949 |
| 3/16/2010 13:11:01 | 25.797 | 3/22/2010 09:09:00 | 27.0 | 3/17/2010 11:09:01 | 25.949 |
| 3/16/2010 13:31:01 | 25.797 | 3/22/2010 09:44:00 | 27.0 | 3/17/2010 11:29:01 | 25.949 |
| 3/16/2010 13:51:01 | 25.797 | 3/22/2010 10:19:00 | 27.0 | 3/17/2010 11:49:01 | 25.949 |
| 3/16/2010 14:11:01 | 25.797 | 3/22/2010 10:54:00 | 27.0 | 3/17/2010 12:09:01 | 25.949 |
| 3/16/2010 14:31:01 | 25.797 | 3/22/2010 11:29:00 | 27.0 | 3/17/2010 12:29:01 | 25.949 |
| 3/16/2010 14:51:01 | 25.797 | 3/22/2010 12:04:00 | 27.0 | 3/17/2010 12:49:01 | 25.949 |
| 3/16/2010 15:11:01 | 25.797 | 3/22/2010 12:39:00 | 27.0 | 3/17/2010 13:09:01 | 25.949 |
| 3/16/2010 15:31:01 | 25.797 | 3/22/2010 13:14:00 | 27.0 | 3/17/2010 13:29:01 | 25.949 |
| 3/16/2010 15:51:01 | 25.797 | 3/22/2010 13:49:00 | 27.0 | 3/17/2010 13:49:01 | 25.949 |
| 3/16/2010 16:11:01 | 25.797 | 3/22/2010 14:24:00 | 27.0 | 3/17/2010 14:09:01 | 25.949 |
| 3/16/2010 16:31:01 | 25.797 | 3/22/2010 14:59:00 | 27.5 | 3/17/2010 14:29:01 | 25.949 |
| 3/16/2010 16:51:01 | 25.797 | 3/22/2010 15:34:00 | 27.5 | 3/17/2010 14:49:01 | 25.949 |
| 3/16/2010 17:11:01 | 25.797 | 3/22/2010 16:09:00 | 27.5 | 3/17/2010 15:09:01 | 25.949 |
| 3/16/2010 17:31:01 | 25.797 | 3/22/2010 16:44:00 | 27.5 | 3/17/2010 15:29:01 | 25.949 |
| 3/16/2010 17:51:01 | 25.797 | 3/22/2010 17:19:00 | 27.5 | 3/17/2010 15:49:01 | 25.949 |
| 3/16/2010 18:11:01 | 25.797 | 3/22/2010 17:54:00 | 27.5 | 3/17/2010 16:09:01 | 25.949 |
| 3/16/2010 18:31:01 | 25.797 | 3/22/2010 18:29:00 | 27.5 | 3/17/2010 16:29:01 | 25.949 |
| 3/16/2010 18:51:01 | 25.797 | 3/22/2010 19:04:00 | 27.5 | 3/17/2010 16:49:01 | 25.949 |
| 3/16/2010 19:11:01 | 25.797 | 3/22/2010 19:39:00 | 28.0 | 3/17/2010 17:09:01 | 25.949 |
| 3/16/2010 19:31:01 | 25.797 | 3/22/2010 20:14:00 | 28.0 | 3/17/2010 17:29:01 | 26.012 |



|                    |        |                    |      |                    |        |
|--------------------|--------|--------------------|------|--------------------|--------|
| 3/16/2010 19:51:01 | 25.797 | 3/22/2010 20:49:00 | 27.5 | 3/17/2010 17:49:01 | 26.012 |
| 3/16/2010 20:11:01 | 25.797 | 3/22/2010 21:24:00 | 27.5 | 3/17/2010 18:09:01 | 26.012 |
| 3/16/2010 20:31:01 | 25.797 | 3/22/2010 21:59:00 | 27.5 | 3/17/2010 18:29:01 | 26.012 |
| 3/16/2010 20:51:01 | 25.797 | 3/22/2010 22:34:00 | 27.5 | 3/17/2010 18:49:01 | 26.012 |
| 3/16/2010 21:11:01 | 25.797 | 3/22/2010 23:09:00 | 27.5 | 3/17/2010 19:09:01 | 26.012 |
| 3/16/2010 21:31:01 | 25.797 | 3/22/2010 23:44:00 | 27.5 | 3/17/2010 19:29:01 | 26.012 |
| 3/16/2010 21:51:01 | 25.797 | 3/23/2010 00:19:00 | 27.5 | 3/17/2010 19:49:01 | 26.012 |
| 3/16/2010 22:11:01 | 25.797 | 3/23/2010 00:54:00 | 27.5 | 3/17/2010 20:09:01 | 26.012 |
| 3/16/2010 22:31:01 | 25.797 | 3/23/2010 01:29:00 | 27.0 | 3/17/2010 20:29:01 | 26.012 |
| 3/16/2010 22:51:01 | 25.797 | 3/23/2010 02:04:00 | 27.0 | 3/17/2010 20:49:01 | 26.074 |
| 3/16/2010 23:11:01 | 25.859 | 3/23/2010 02:39:00 | 27.0 | 3/17/2010 21:09:01 | 26.074 |
| 3/16/2010 23:31:01 | 25.859 | 3/23/2010 03:14:00 | 27.0 | 3/17/2010 21:29:01 | 26.074 |
| 3/16/2010 23:51:01 | 25.859 | 3/23/2010 03:49:00 | 27.0 | 3/17/2010 21:49:01 | 26.074 |
| 3/17/2010 00:11:01 | 25.859 | 3/23/2010 04:24:00 | 27.0 | 3/17/2010 22:09:01 | 26.074 |
| 3/17/2010 00:31:01 | 25.859 | 3/23/2010 04:59:00 | 27.0 | 3/17/2010 22:29:01 | 26.074 |
| 3/17/2010 00:51:01 | 25.859 | 3/23/2010 05:34:00 | 27.0 | 3/17/2010 22:49:01 | 26.074 |
| 3/17/2010 01:11:01 | 25.859 | 3/23/2010 06:09:00 | 27.0 | 3/17/2010 23:09:01 | 26.074 |
| 3/17/2010 01:31:01 | 25.859 | 3/23/2010 06:44:00 | 27.0 | 3/17/2010 23:29:01 | 26.074 |
| 3/17/2010 01:51:01 | 25.859 | 3/23/2010 07:19:00 | 27.0 | 3/17/2010 23:49:01 | 26.074 |
| 3/17/2010 02:11:01 | 25.859 | 3/23/2010 07:54:00 | 27.0 | 3/18/2010 00:09:01 | 26.074 |
| 3/17/2010 02:31:01 | 25.859 | 3/23/2010 08:29:00 | 27.0 | 3/18/2010 00:29:01 | 26.074 |
| 3/17/2010 02:51:01 | 25.859 | 3/23/2010 09:04:00 | 27.0 | 3/18/2010 00:49:01 | 26.074 |
| 3/17/2010 03:11:01 | 25.859 | 3/23/2010 09:39:00 | 27.0 | 3/18/2010 01:09:01 | 26.074 |
| 3/17/2010 03:31:01 | 25.859 | 3/23/2010 10:14:00 | 27.0 | 3/18/2010 01:29:01 | 26.074 |
| 3/17/2010 03:51:01 | 25.859 | 3/23/2010 10:49:00 | 27.0 | 3/18/2010 01:49:01 | 26.074 |
| 3/17/2010 04:11:01 | 25.859 | 3/23/2010 11:24:00 | 27.0 | 3/18/2010 02:09:01 | 26.074 |
| 3/17/2010 04:31:01 | 25.859 | 3/23/2010 11:59:00 | 27.0 | 3/18/2010 02:29:01 | 26.074 |
| 3/17/2010 04:51:01 | 25.859 | 3/23/2010 12:34:00 | 27.0 | 3/18/2010 02:49:01 | 26.074 |
| 3/17/2010 05:11:01 | 25.859 | 3/23/2010 13:09:00 | 27.0 | 3/18/2010 03:09:01 | 26.074 |
| 3/17/2010 05:31:01 | 25.859 | 3/23/2010 13:44:00 | 27.0 | 3/18/2010 03:29:01 | 26.074 |
| 3/17/2010 05:51:01 | 25.859 | 3/23/2010 14:19:00 | 27.0 | 3/18/2010 03:49:01 | 26.074 |
| 3/17/2010 06:11:01 | 25.859 | 3/23/2010 14:54:00 | 27.0 | 3/18/2010 04:09:01 | 26.074 |
| 3/17/2010 06:31:01 | 25.859 | 3/23/2010 15:29:00 | 27.0 | 3/18/2010 04:29:01 | 26.074 |
| 3/17/2010 06:51:01 | 25.859 | 3/23/2010 16:04:00 | 27.0 | 3/18/2010 04:49:01 | 26.012 |
| 3/17/2010 07:11:01 | 25.859 | 3/23/2010 16:39:00 | 27.0 | 3/18/2010 05:09:01 | 26.012 |
| 3/17/2010 07:31:01 | 25.859 | 3/23/2010 17:14:00 | 27.0 | 3/18/2010 05:29:01 | 26.012 |
| 3/17/2010 07:51:01 | 25.859 | 3/23/2010 17:49:00 | 27.0 | 3/18/2010 05:49:01 | 26.012 |
| 3/17/2010 08:11:01 | 25.859 | 3/23/2010 18:24:00 | 27.0 | 3/18/2010 06:09:01 | 26.012 |
| 3/17/2010 08:31:01 | 25.859 | 3/23/2010 18:59:00 | 27.0 | 3/18/2010 06:29:01 | 26.012 |
| 3/17/2010 08:51:01 | 25.859 | 3/23/2010 19:34:00 | 27.0 | 3/18/2010 06:49:01 | 26.012 |
| 3/17/2010 09:11:01 | 25.859 | 3/23/2010 20:09:00 | 27.0 | 3/18/2010 07:09:01 | 26.012 |
| 3/17/2010 09:31:01 | 25.859 | 3/23/2010 20:44:00 | 27.5 | 3/18/2010 07:29:01 | 26.012 |
| 3/17/2010 09:51:01 | 25.859 | 3/23/2010 21:19:00 | 27.0 | 3/18/2010 07:49:01 | 26.012 |
| 3/17/2010 10:11:01 | 25.859 | 3/23/2010 21:54:00 | 27.5 | 3/18/2010 08:09:01 | 26.012 |
| 3/17/2010 10:31:01 | 25.797 | 3/23/2010 22:29:00 | 27.0 | 3/18/2010 08:29:01 | 26.012 |
| 3/17/2010 10:51:01 | 25.797 | 3/23/2010 23:04:00 | 27.0 | 3/18/2010 08:49:01 | 26.012 |
| 3/17/2010 11:11:01 | 25.797 | 3/23/2010 23:39:00 | 27.0 | 3/18/2010 09:09:01 | 26.012 |
| 3/17/2010 11:31:01 | 25.797 | 3/24/2010 00:14:00 | 27.0 | 3/18/2010 09:29:01 | 25.949 |
| 3/17/2010 11:51:01 | 25.859 | 3/24/2010 00:49:00 | 27.0 | 3/18/2010 09:49:01 | 25.949 |
| 3/17/2010 12:11:01 | 25.797 | 3/24/2010 01:24:00 | 27.0 | 3/18/2010 10:09:01 | 25.949 |

|                    |        |                    |      |                    |        |
|--------------------|--------|--------------------|------|--------------------|--------|
| 3/17/2010 12:31:01 | 25.797 | 3/24/2010 01:59:00 | 27.0 | 3/18/2010 10:29:01 | 25.949 |
| 3/17/2010 12:51:01 | 25.797 | 3/24/2010 02:34:00 | 27.0 | 3/18/2010 10:49:01 | 25.949 |
| 3/17/2010 13:11:01 | 25.797 | 3/24/2010 03:09:00 | 27.0 | 3/18/2010 11:09:01 | 25.949 |
| 3/17/2010 13:31:01 | 25.797 | 3/24/2010 03:44:00 | 27.0 | 3/18/2010 11:29:01 | 25.949 |
| 3/17/2010 13:51:01 | 25.797 | 3/24/2010 04:19:00 | 27.0 | 3/18/2010 11:49:01 | 25.949 |
| 3/17/2010 14:11:01 | 25.797 | 3/24/2010 04:54:00 | 27.0 | 3/18/2010 12:09:01 | 25.949 |
| 3/17/2010 14:31:01 | 25.797 | 3/24/2010 05:29:00 | 27.0 | 3/18/2010 12:29:01 | 25.949 |
| 3/17/2010 14:51:01 | 25.797 | 3/24/2010 06:04:00 | 27.0 | 3/18/2010 12:49:01 | 25.949 |
| 3/17/2010 15:11:01 | 25.797 | 3/24/2010 06:39:00 | 27.0 | 3/18/2010 13:09:01 | 25.949 |
| 3/17/2010 15:31:01 | 25.797 | 3/24/2010 07:14:00 | 26.5 | 3/18/2010 13:29:01 | 25.949 |
| 3/17/2010 15:51:01 | 25.797 | 3/24/2010 07:49:00 | 26.5 | 3/18/2010 13:49:01 | 25.949 |
| 3/17/2010 16:11:01 | 25.797 | 3/24/2010 08:24:00 | 26.5 | 3/18/2010 14:09:01 | 25.949 |
| 3/17/2010 16:31:01 | 25.797 | 3/24/2010 08:59:00 | 27.0 | 3/18/2010 14:29:01 | 25.949 |
| 3/17/2010 16:51:01 | 25.797 | 3/24/2010 09:34:00 | 27.0 | 3/18/2010 14:49:01 | 25.949 |
| 3/17/2010 17:11:01 | 25.797 | 3/24/2010 10:09:00 | 27.0 | 3/18/2010 15:09:01 | 25.949 |
| 3/17/2010 17:31:01 | 25.797 | 3/24/2010 10:44:00 | 26.5 | 3/18/2010 15:29:01 | 25.949 |
| 3/17/2010 17:51:01 | 25.797 | 3/24/2010 11:19:00 | 26.5 | 3/18/2010 15:49:01 | 25.949 |
| 3/17/2010 18:11:01 | 25.797 | 3/24/2010 11:54:00 | 26.5 | 3/18/2010 16:09:01 | 25.949 |
| 3/17/2010 18:31:01 | 25.797 | 3/24/2010 12:29:00 | 26.5 | 3/18/2010 16:29:01 | 25.949 |
| 3/17/2010 18:51:01 | 25.797 | 3/24/2010 13:04:00 | 26.5 | 3/18/2010 16:49:01 | 25.949 |
| 3/17/2010 19:11:01 | 25.859 | 3/24/2010 13:39:00 | 27.0 | 3/18/2010 17:09:01 | 25.949 |
| 3/17/2010 19:31:01 | 25.859 | 3/24/2010 14:14:00 | 26.5 | 3/18/2010 17:29:01 | 25.949 |
| 3/17/2010 19:51:01 | 25.859 | 3/24/2010 14:49:00 | 27.0 | 3/18/2010 17:49:01 | 25.949 |
| 3/17/2010 20:11:01 | 25.859 | 3/24/2010 15:24:00 | 27.0 | 3/18/2010 18:09:01 | 25.949 |
| 3/17/2010 20:31:01 | 25.859 | 3/24/2010 15:59:00 | 27.0 | 3/18/2010 18:29:01 | 26.012 |
| 3/17/2010 20:51:01 | 25.859 | 3/24/2010 16:34:00 | 27.0 | 3/18/2010 18:49:01 | 26.012 |
| 3/17/2010 21:11:01 | 25.859 | 3/24/2010 17:09:00 | 27.0 | 3/18/2010 19:09:01 | 26.012 |
| 3/17/2010 21:31:01 | 25.859 | 3/24/2010 17:44:00 | 27.0 | 3/18/2010 19:29:01 | 26.012 |
| 3/17/2010 21:51:01 | 25.859 | 3/24/2010 18:19:00 | 27.0 | 3/18/2010 19:49:01 | 26.012 |
| 3/17/2010 22:11:01 | 25.859 | 3/24/2010 18:54:00 | 27.0 | 3/18/2010 20:09:01 | 26.074 |
| 3/17/2010 22:31:01 | 25.859 | 3/24/2010 19:29:00 | 27.0 | 3/18/2010 20:29:01 | 26.074 |
| 3/17/2010 22:51:01 | 25.859 | 3/24/2010 20:04:00 | 27.0 | 3/18/2010 20:49:01 | 26.074 |
| 3/17/2010 23:11:01 | 25.859 | 3/24/2010 20:39:00 | 27.5 | 3/18/2010 21:09:01 | 26.074 |
| 3/17/2010 23:31:01 | 25.859 | 3/24/2010 21:14:00 | 27.5 | 3/18/2010 21:29:01 | 26.074 |
| 3/17/2010 23:51:01 | 25.859 | 3/24/2010 21:49:00 | 27.5 | 3/18/2010 21:49:01 | 26.074 |
| 3/18/2010 00:11:01 | 25.859 | 3/24/2010 22:24:00 | 27.5 | 3/18/2010 22:09:01 | 26.137 |
| 3/18/2010 00:31:01 | 25.859 | 3/24/2010 22:59:00 | 27.5 | 3/18/2010 22:29:01 | 26.137 |
| 3/18/2010 00:51:01 | 25.859 | 3/24/2010 23:34:00 | 27.5 | 3/18/2010 22:49:01 | 26.137 |
| 3/18/2010 01:11:01 | 25.859 | 3/25/2010 00:09:00 | 27.5 | 3/18/2010 23:09:01 | 26.137 |
| 3/18/2010 01:31:01 | 25.859 | 3/25/2010 00:44:00 | 27.5 | 3/18/2010 23:29:01 | 26.137 |
| 3/18/2010 01:51:01 | 25.922 | 3/25/2010 01:19:00 | 27.5 | 3/18/2010 23:49:01 | 26.137 |
| 3/18/2010 02:11:01 | 25.859 | 3/25/2010 01:54:00 | 27.0 | 3/19/2010 00:09:01 | 26.137 |
| 3/18/2010 02:31:01 | 25.859 | 3/25/2010 02:29:00 | 27.5 | 3/19/2010 00:29:01 | 26.137 |
| 3/18/2010 02:51:01 | 25.922 | 3/25/2010 03:04:00 | 27.0 | 3/19/2010 00:49:01 | 26.137 |
| 3/18/2010 03:11:01 | 25.922 | 3/25/2010 03:39:00 | 27.0 | 3/19/2010 01:09:01 | 26.137 |
| 3/18/2010 03:31:01 | 25.922 | 3/25/2010 04:14:00 | 27.0 | 3/19/2010 01:29:01 | 26.137 |
| 3/18/2010 03:51:01 | 25.922 | 3/25/2010 04:49:00 | 27.0 | 3/19/2010 01:49:01 | 26.137 |
| 3/18/2010 04:11:01 | 25.859 | 3/25/2010 05:24:00 | 27.0 | 3/19/2010 02:09:01 | 26.137 |
| 3/18/2010 04:31:01 | 25.922 | 3/25/2010 05:59:00 | 27.0 | 3/19/2010 02:29:01 | 26.137 |
| 3/18/2010 04:51:01 | 25.922 | 3/25/2010 06:34:00 | 27.0 | 3/19/2010 02:49:01 | 26.137 |

|                    |        |                    |      |                    |        |
|--------------------|--------|--------------------|------|--------------------|--------|
| 3/18/2010 05:11:01 | 25.859 | 3/25/2010 07:09:00 | 27.0 | 3/19/2010 03:09:01 | 26.137 |
| 3/18/2010 05:31:01 | 25.922 | 3/25/2010 07:44:00 | 27.0 | 3/19/2010 03:29:01 | 26.074 |
| 3/18/2010 05:51:01 | 25.859 | 3/25/2010 08:19:00 | 27.0 | 3/19/2010 03:49:01 | 26.074 |
| 3/18/2010 06:11:01 | 25.859 | 3/25/2010 08:54:00 | 27.0 | 3/19/2010 04:09:01 | 26.074 |
| 3/18/2010 06:31:01 | 25.859 | 3/25/2010 09:29:00 | 27.0 | 3/19/2010 04:29:01 | 26.074 |
| 3/18/2010 06:51:01 | 25.859 | 3/25/2010 10:04:00 | 27.0 | 3/19/2010 04:49:01 | 26.074 |
| 3/18/2010 07:11:01 | 25.859 | 3/25/2010 10:39:00 | 27.0 | 3/19/2010 05:09:01 | 26.074 |
| 3/18/2010 07:31:01 | 25.859 | 3/25/2010 11:14:00 | 27.0 | 3/19/2010 05:29:01 | 26.074 |
| 3/18/2010 07:51:01 | 25.859 | 3/25/2010 11:49:00 | 27.0 | 3/19/2010 05:49:01 | 26.074 |
| 3/18/2010 08:11:01 | 25.859 | 3/25/2010 12:24:00 | 27.0 | 3/19/2010 06:09:01 | 26.074 |
| 3/18/2010 08:31:01 | 25.859 | 3/25/2010 12:59:00 | 27.0 | 3/19/2010 06:29:01 | 26.074 |
| 3/18/2010 08:51:01 | 25.859 | 3/25/2010 13:34:00 | 27.0 | 3/19/2010 06:49:01 | 26.074 |
| 3/18/2010 09:11:01 | 25.859 | 3/25/2010 14:09:00 | 27.0 | 3/19/2010 07:09:01 | 26.012 |
| 3/18/2010 09:31:01 | 25.859 | 3/25/2010 14:44:00 | 27.0 | 3/19/2010 07:29:01 | 26.012 |
| 3/18/2010 09:51:01 | 25.859 | 3/25/2010 15:19:00 | 27.0 | 3/19/2010 07:49:01 | 26.012 |
| 3/18/2010 10:11:01 | 25.859 | 3/25/2010 15:54:00 | 27.5 | 3/19/2010 08:09:01 | 26.012 |
| 3/18/2010 10:31:01 | 25.859 | 3/25/2010 16:29:00 | 27.5 | 3/19/2010 08:29:01 | 26.012 |
| 3/18/2010 10:51:01 | 25.859 | 3/25/2010 17:04:00 | 27.5 | 3/19/2010 08:49:01 | 26.012 |
| 3/18/2010 11:11:01 | 25.859 | 3/25/2010 17:39:00 | 27.5 | 3/19/2010 09:09:01 | 26.012 |
| 3/18/2010 11:31:01 | 25.859 | 3/25/2010 18:14:00 | 27.5 | 3/19/2010 09:29:01 | 26.012 |
| 3/18/2010 11:51:01 | 25.859 | 3/25/2010 18:49:00 | 27.5 | 3/19/2010 09:49:01 | 26.012 |
| 3/18/2010 12:11:01 | 25.859 | 3/25/2010 19:24:00 | 27.5 | 3/19/2010 10:09:01 | 26.012 |
| 3/18/2010 12:31:01 | 25.859 | 3/25/2010 19:59:00 | 27.5 | 3/19/2010 10:29:01 | 26.012 |
| 3/18/2010 12:51:01 | 25.859 | 3/25/2010 20:34:00 | 27.5 | 3/19/2010 10:49:01 | 25.949 |
| 3/18/2010 13:11:01 | 25.859 | 3/25/2010 21:09:00 | 27.5 | 3/19/2010 11:09:01 | 25.949 |
| 3/18/2010 13:31:01 | 25.859 | 3/25/2010 21:44:00 | 27.5 | 3/19/2010 11:29:01 | 25.949 |
| 3/18/2010 13:51:01 | 25.859 | 3/25/2010 22:19:00 | 27.5 | 3/19/2010 11:49:01 | 25.949 |
| 3/18/2010 14:11:01 | 25.859 | 3/25/2010 22:54:00 | 27.5 | 3/19/2010 12:09:01 | 25.949 |
| 3/18/2010 14:31:01 | 25.859 | 3/25/2010 23:29:00 | 27.5 | 3/19/2010 12:29:01 | 25.949 |
| 3/18/2010 14:51:01 | 25.797 | 3/26/2010 00:04:00 | 27.0 | 3/19/2010 12:49:01 | 25.949 |
| 3/18/2010 15:11:01 | 25.859 | 3/26/2010 00:39:00 | 27.0 | 3/19/2010 13:09:01 | 25.949 |
| 3/18/2010 15:31:01 | 25.797 | 3/26/2010 01:14:00 | 27.0 | 3/19/2010 13:29:01 | 25.949 |
| 3/18/2010 15:51:01 | 25.859 | 3/26/2010 01:49:00 | 27.0 | 3/19/2010 13:49:01 | 25.949 |
| 3/18/2010 16:11:01 | 25.797 | 3/26/2010 02:24:00 | 27.0 | 3/19/2010 14:09:01 | 25.949 |
| 3/18/2010 16:31:01 | 25.859 | 3/26/2010 02:59:00 | 27.0 | 3/19/2010 14:29:01 | 25.949 |
| 3/18/2010 16:51:01 | 25.859 | 3/26/2010 03:34:00 | 27.0 | 3/19/2010 14:49:01 | 25.949 |
| 3/18/2010 17:11:01 | 25.797 | 3/26/2010 04:09:00 | 27.0 | 3/19/2010 15:09:01 | 25.949 |
| 3/18/2010 17:31:01 | 25.797 | 3/26/2010 04:44:00 | 27.0 | 3/19/2010 15:29:01 | 25.949 |
| 3/18/2010 17:51:01 | 25.859 | 3/26/2010 05:19:00 | 27.0 | 3/19/2010 15:49:01 | 25.949 |
| 3/18/2010 18:11:01 | 25.859 | 3/26/2010 05:54:00 | 27.0 | 3/19/2010 16:09:01 | 25.949 |
| 3/18/2010 18:31:01 | 25.859 | 3/26/2010 06:29:00 | 27.0 | 3/19/2010 16:29:01 | 25.949 |
| 3/18/2010 18:51:01 | 25.859 | 3/26/2010 07:04:00 | 27.0 | 3/19/2010 16:49:01 | 25.949 |
| 3/18/2010 19:11:01 | 25.859 | 3/26/2010 07:39:00 | 27.0 | 3/19/2010 17:09:01 | 26.012 |
| 3/18/2010 19:31:01 | 25.859 | 3/26/2010 08:14:00 | 27.0 | 3/19/2010 17:29:01 | 26.012 |
| 3/18/2010 19:51:01 | 25.859 | 3/26/2010 08:49:00 | 27.0 | 3/19/2010 17:49:01 | 26.012 |
| 3/18/2010 20:11:01 | 25.859 | 3/26/2010 09:24:00 | 26.5 | 3/19/2010 18:09:01 | 26.012 |
| 3/18/2010 20:31:01 | 25.859 | 3/26/2010 09:59:00 | 26.5 | 3/19/2010 18:29:01 | 26.012 |
| 3/18/2010 20:51:01 | 25.859 | 3/26/2010 10:34:00 | 26.5 | 3/19/2010 18:49:01 | 26.012 |
| 3/18/2010 21:11:01 | 25.859 | 3/26/2010 11:09:00 | 26.5 | 3/19/2010 19:09:01 | 26.074 |
| 3/18/2010 21:31:01 | 25.859 | 3/26/2010 11:44:00 | 26.5 | 3/19/2010 19:29:01 | 26.074 |

|                    |        |                    |      |                    |        |
|--------------------|--------|--------------------|------|--------------------|--------|
| 3/18/2010 21:51:01 | 25.922 | 3/26/2010 12:19:00 | 26.5 | 3/19/2010 19:49:01 | 26.074 |
| 3/18/2010 22:11:01 | 25.922 | 3/26/2010 12:54:00 | 27.0 | 3/19/2010 20:09:01 | 26.074 |
| 3/18/2010 22:31:01 | 25.922 | 3/26/2010 13:29:00 | 27.0 | 3/19/2010 20:29:01 | 26.074 |
| 3/18/2010 22:51:01 | 25.922 | 3/26/2010 14:04:00 | 27.0 | 3/19/2010 20:49:01 | 26.074 |
| 3/18/2010 23:11:01 | 25.922 | 3/26/2010 14:39:00 | 27.0 | 3/19/2010 21:09:01 | 26.074 |
| 3/18/2010 23:31:01 | 25.922 | 3/26/2010 15:14:00 | 27.0 | 3/19/2010 21:29:01 | 26.137 |
| 3/18/2010 23:51:01 | 25.922 | 3/26/2010 15:49:00 | 27.0 | 3/19/2010 21:49:01 | 26.137 |
| 3/19/2010 00:11:01 | 25.922 | 3/26/2010 16:24:00 | 27.0 | 3/19/2010 22:09:01 | 26.137 |
| 3/19/2010 00:31:01 | 25.922 | 3/26/2010 16:59:00 | 27.0 | 3/19/2010 22:29:01 | 26.137 |
| 3/19/2010 00:51:01 | 25.922 | 3/26/2010 17:34:00 | 27.0 | 3/19/2010 22:49:01 | 26.137 |
| 3/19/2010 01:11:01 | 25.922 | 3/26/2010 18:09:00 | 27.0 | 3/19/2010 23:09:01 | 26.137 |
| 3/19/2010 01:31:01 | 25.922 | 3/26/2010 18:44:00 | 27.0 | 3/19/2010 23:29:01 | 26.137 |
| 3/19/2010 01:51:01 | 25.922 | 3/26/2010 19:19:00 | 27.0 | 3/19/2010 23:49:01 | 26.137 |
| 3/19/2010 02:11:01 | 25.922 | 3/26/2010 19:54:00 | 27.0 | 3/20/2010 00:09:01 | 26.137 |
| 3/19/2010 02:31:01 | 25.922 | 3/26/2010 20:29:00 | 27.0 | 3/20/2010 00:29:01 | 26.199 |
| 3/19/2010 02:51:01 | 25.922 | 3/26/2010 21:04:00 | 27.5 | 3/20/2010 00:49:01 | 26.199 |
| 3/19/2010 03:11:01 | 25.922 | 3/26/2010 21:39:00 | 27.5 | 3/20/2010 01:09:01 | 26.199 |
| 3/19/2010 03:31:01 | 25.922 | 3/26/2010 22:14:00 | 27.5 | 3/20/2010 01:29:01 | 26.199 |
| 3/19/2010 03:51:01 | 25.922 | 3/26/2010 22:49:00 | 27.5 | 3/20/2010 01:49:01 | 26.199 |
| 3/19/2010 04:11:01 | 25.922 | 3/26/2010 23:24:00 | 27.5 | 3/20/2010 02:09:01 | 26.199 |
| 3/19/2010 04:31:01 | 25.922 | 3/26/2010 23:59:00 | 27.0 | 3/20/2010 02:29:01 | 26.199 |
| 3/19/2010 04:51:01 | 25.922 | 3/27/2010 00:34:00 | 27.0 | 3/20/2010 02:49:01 | 26.199 |
| 3/19/2010 05:11:01 | 25.922 | 3/27/2010 01:09:00 | 27.0 | 3/20/2010 03:09:01 | 26.199 |
| 3/19/2010 05:31:01 | 25.922 | 3/27/2010 01:44:00 | 27.0 | 3/20/2010 03:29:01 | 26.199 |
| 3/19/2010 05:51:01 | 25.922 | 3/27/2010 02:19:00 | 27.0 | 3/20/2010 03:49:01 | 26.199 |
| 3/19/2010 06:11:01 | 25.922 | 3/27/2010 02:54:00 | 27.0 | 3/20/2010 04:09:01 | 26.199 |
| 3/19/2010 06:31:01 | 25.922 | 3/27/2010 03:29:00 | 27.0 | 3/20/2010 04:29:01 | 26.199 |
| 3/19/2010 06:51:01 | 25.922 | 3/27/2010 04:04:00 | 27.0 | 3/20/2010 04:49:01 | 26.199 |
| 3/19/2010 07:11:01 | 25.922 | 3/27/2010 04:39:00 | 27.0 | 3/20/2010 05:09:01 | 26.199 |
| 3/19/2010 07:31:01 | 25.859 | 3/27/2010 05:14:00 | 27.0 | 3/20/2010 05:29:01 | 26.199 |
| 3/19/2010 07:51:01 | 25.859 | 3/27/2010 05:49:00 | 27.0 | 3/20/2010 05:49:01 | 26.199 |
| 3/19/2010 08:11:01 | 25.859 | 3/27/2010 06:24:00 | 27.0 | 3/20/2010 06:09:01 | 26.199 |
| 3/19/2010 08:31:01 | 25.859 | 3/27/2010 06:59:00 | 27.0 | 3/20/2010 06:29:01 | 26.199 |
| 3/19/2010 08:51:01 | 25.859 | 3/27/2010 07:34:00 | 27.0 | 3/20/2010 06:49:01 | 26.199 |
| 3/19/2010 09:11:01 | 25.859 | 3/27/2010 08:09:00 | 27.0 | 3/20/2010 07:09:01 | 26.199 |
| 3/19/2010 09:31:01 | 25.859 | 3/27/2010 08:44:00 | 27.0 | 3/20/2010 07:29:01 | 26.199 |
| 3/19/2010 09:51:01 | 25.859 | 3/27/2010 09:19:00 | 26.5 | 3/20/2010 07:49:01 | 26.199 |
| 3/19/2010 10:11:01 | 25.859 | 3/27/2010 09:54:00 | 26.5 | 3/20/2010 08:09:01 | 26.199 |
| 3/19/2010 10:31:01 | 25.859 | 3/27/2010 10:29:00 | 26.5 | 3/20/2010 08:29:01 | 26.199 |
| 3/19/2010 10:51:01 | 25.859 | 3/27/2010 11:04:00 | 26.5 | 3/20/2010 08:49:01 | 26.199 |
| 3/19/2010 11:11:01 | 25.859 | 3/27/2010 11:39:00 | 26.5 | 3/20/2010 09:09:01 | 26.137 |
| 3/19/2010 11:31:01 | 25.859 | 3/27/2010 12:14:00 | 26.5 | 3/20/2010 09:29:01 | 26.137 |
| 3/19/2010 11:51:01 | 25.859 | 3/27/2010 12:49:00 | 27.0 | 3/20/2010 09:49:01 | 26.137 |
| 3/19/2010 12:11:01 | 25.859 | 3/27/2010 13:24:00 | 27.0 | 3/20/2010 10:09:01 | 26.137 |
| 3/19/2010 12:31:01 | 25.859 | 3/27/2010 13:59:00 | 27.0 | 3/20/2010 10:29:01 | 26.137 |
| 3/19/2010 12:51:01 | 25.859 | 3/27/2010 14:34:00 | 27.0 | 3/20/2010 10:49:01 | 26.137 |
| 3/19/2010 13:11:01 | 25.797 | 3/27/2010 15:09:00 | 27.0 | 3/20/2010 11:09:01 | 26.137 |
| 3/19/2010 13:31:01 | 25.797 | 3/27/2010 15:44:00 | 27.0 | 3/20/2010 11:29:01 | 26.137 |
| 3/19/2010 13:51:01 | 25.797 | 3/27/2010 16:19:00 | 27.0 | 3/20/2010 11:49:01 | 26.137 |
| 3/19/2010 14:11:01 | 25.797 | 3/27/2010 16:54:00 | 27.0 | 3/20/2010 12:09:01 | 26.137 |

|                    |        |                    |      |                    |        |
|--------------------|--------|--------------------|------|--------------------|--------|
| 3/19/2010 14:31:01 | 25.797 | 3/27/2010 17:29:00 | 27.5 | 3/20/2010 12:29:01 | 26.137 |
| 3/19/2010 14:51:01 | 25.797 | 3/27/2010 18:04:00 | 27.5 | 3/20/2010 12:49:01 | 26.137 |
| 3/19/2010 15:11:01 | 25.797 | 3/27/2010 18:39:00 | 27.5 | 3/20/2010 13:09:01 | 26.137 |
| 3/19/2010 15:31:01 | 25.797 | 3/27/2010 19:14:00 | 27.5 | 3/20/2010 13:29:01 | 26.074 |
| 3/19/2010 15:51:01 | 25.797 | 3/27/2010 19:49:00 | 27.5 | 3/20/2010 13:49:01 | 26.074 |
| 3/19/2010 16:11:01 | 25.797 | 3/27/2010 20:24:00 | 27.5 | 3/20/2010 14:09:01 | 26.074 |
| 3/19/2010 16:31:01 | 25.797 | 3/27/2010 20:59:00 | 27.5 | 3/20/2010 14:29:01 | 26.074 |
| 3/19/2010 16:51:01 | 25.797 | 3/27/2010 21:34:00 | 27.5 | 3/20/2010 14:49:01 | 26.074 |
| 3/19/2010 17:11:01 | 25.797 | 3/27/2010 22:09:00 | 27.5 | 3/20/2010 15:09:01 | 26.074 |
| 3/19/2010 17:31:01 | 25.797 | 3/27/2010 22:44:00 | 27.5 | 3/20/2010 15:29:01 | 26.074 |
| 3/19/2010 17:51:01 | 25.797 | 3/27/2010 23:19:00 | 27.5 | 3/20/2010 15:49:01 | 26.074 |
| 3/19/2010 18:11:01 | 25.797 | 3/27/2010 23:54:00 | 27.5 | 3/20/2010 16:09:01 | 26.074 |
| 3/19/2010 18:31:01 | 25.797 | 3/28/2010 00:29:00 | 27.5 | 3/20/2010 16:29:01 | 26.074 |
| 3/19/2010 18:51:01 | 25.797 | 3/28/2010 01:04:00 | 27.5 | 3/20/2010 16:49:01 | 26.074 |
| 3/19/2010 19:11:01 | 25.859 | 3/28/2010 01:39:00 | 27.5 | 3/20/2010 17:09:01 | 26.074 |
| 3/19/2010 19:31:01 | 25.859 | 3/28/2010 02:14:00 | 27.5 | 3/20/2010 17:29:01 | 26.074 |
| 3/19/2010 19:51:01 | 25.859 | 3/28/2010 02:49:00 | 27.0 | 3/20/2010 17:49:01 | 26.074 |
| 3/19/2010 20:11:01 | 25.859 | 3/28/2010 03:24:00 | 27.0 | 3/20/2010 18:09:01 | 26.074 |
| 3/19/2010 20:31:01 | 25.859 | 3/28/2010 03:59:00 | 27.0 | 3/20/2010 18:29:01 | 26.074 |
| 3/19/2010 20:51:01 | 25.859 | 3/28/2010 04:34:00 | 27.0 | 3/20/2010 18:49:01 | 26.074 |
| 3/19/2010 21:11:01 | 25.859 | 3/28/2010 05:09:00 | 27.0 | 3/20/2010 19:09:01 | 26.074 |
| 3/19/2010 21:31:01 | 25.859 | 3/28/2010 05:44:00 | 27.0 | 3/20/2010 19:29:01 | 26.074 |
| 3/19/2010 21:51:01 | 25.859 | 3/28/2010 06:19:00 | 27.0 | 3/20/2010 19:49:01 | 26.074 |
| 3/19/2010 22:11:01 | 25.859 | 3/28/2010 06:54:00 | 27.0 | 3/20/2010 20:09:01 | 26.137 |
| 3/19/2010 22:31:01 | 25.859 | 3/28/2010 07:29:00 | 27.0 | 3/20/2010 20:29:01 | 26.137 |
| 3/19/2010 22:51:01 | 25.859 | 3/28/2010 08:04:00 | 27.0 | 3/20/2010 20:49:01 | 26.137 |
| 3/19/2010 23:11:01 | 25.859 | 3/28/2010 08:39:00 | 27.0 | 3/20/2010 21:09:01 | 26.137 |
| 3/19/2010 23:31:01 | 25.859 | 3/28/2010 09:14:00 | 27.0 | 3/20/2010 21:29:01 | 26.137 |
| 3/19/2010 23:51:01 | 25.859 | 3/28/2010 09:49:00 | 26.5 | 3/20/2010 21:49:01 | 26.137 |
| 3/20/2010 00:11:01 | 25.922 | 3/28/2010 10:24:00 | 26.5 | 3/20/2010 22:09:01 | 26.137 |
| 3/20/2010 00:31:01 | 25.922 | 3/28/2010 10:59:00 | 26.5 | 3/20/2010 22:29:01 | 26.137 |
| 3/20/2010 00:51:01 | 25.922 | 3/28/2010 11:34:00 | 26.5 | 3/20/2010 22:49:01 | 26.137 |
| 3/20/2010 01:11:01 | 25.922 | 3/28/2010 12:09:00 | 27.0 | 3/20/2010 23:09:01 | 26.137 |
| 3/20/2010 01:31:01 | 25.922 | 3/28/2010 12:44:00 | 27.0 | 3/20/2010 23:29:01 | 26.137 |
| 3/20/2010 01:51:01 | 25.922 | 3/28/2010 13:19:00 | 27.0 | 3/20/2010 23:49:01 | 26.137 |
| 3/20/2010 02:11:01 | 25.922 | 3/28/2010 13:54:00 | 27.0 | 3/21/2010 00:09:01 | 26.137 |
| 3/20/2010 02:31:01 | 25.922 | 3/28/2010 14:29:00 | 27.0 | 3/21/2010 00:29:01 | 26.137 |
| 3/20/2010 02:51:01 | 25.922 | 3/28/2010 15:04:00 | 27.0 | 3/21/2010 00:49:01 | 26.137 |
| 3/20/2010 03:11:01 | 25.922 | 3/28/2010 15:39:00 | 27.0 | 3/21/2010 01:09:01 | 26.137 |
| 3/20/2010 03:31:01 | 25.922 | 3/28/2010 16:14:00 | 27.0 | 3/21/2010 01:29:01 | 26.137 |
| 3/20/2010 03:51:01 | 25.922 | 3/28/2010 16:49:00 | 27.0 | 3/21/2010 01:49:01 | 26.137 |
| 3/20/2010 04:11:01 | 25.922 | 3/28/2010 17:24:00 | 27.0 | 3/21/2010 02:09:01 | 26.137 |
| 3/20/2010 04:31:01 | 25.922 | 3/28/2010 17:59:00 | 27.0 | 3/21/2010 02:29:01 | 26.137 |
| 3/20/2010 04:51:01 | 25.922 | 3/28/2010 18:34:00 | 27.0 | 3/21/2010 02:49:01 | 26.137 |
| 3/20/2010 05:11:01 | 25.922 | 3/28/2010 19:09:00 | 27.0 | 3/21/2010 03:09:01 | 26.137 |
| 3/20/2010 05:31:01 | 25.922 | 3/28/2010 19:44:00 | 27.0 | 3/21/2010 03:29:01 | 26.137 |
| 3/20/2010 05:51:01 | 25.922 | 3/28/2010 20:19:00 | 27.0 | 3/21/2010 03:49:01 | 26.137 |
| 3/20/2010 06:11:01 | 25.922 | 3/28/2010 20:54:00 | 27.5 | 3/21/2010 04:09:01 | 26.137 |
| 3/20/2010 06:31:01 | 25.922 | 3/28/2010 21:29:00 | 27.5 | 3/21/2010 04:29:01 | 26.137 |
| 3/20/2010 06:51:01 | 25.922 | 3/28/2010 22:04:00 | 27.5 | 3/21/2010 04:49:01 | 26.137 |

|                    |        |                    |      |                    |        |
|--------------------|--------|--------------------|------|--------------------|--------|
| 3/20/2010 07:11:01 | 25.922 | 3/28/2010 22:39:00 | 27.5 | 3/21/2010 05:09:01 | 26.137 |
| 3/20/2010 07:31:01 | 25.922 | 3/28/2010 23:14:00 | 27.5 | 3/21/2010 05:29:01 | 26.137 |
| 3/20/2010 07:51:01 | 25.922 | 3/28/2010 23:49:00 | 27.0 | 3/21/2010 05:49:01 | 26.074 |
| 3/20/2010 08:11:01 | 25.922 | 3/29/2010 00:24:00 | 27.0 | 3/21/2010 06:09:01 | 26.074 |
| 3/20/2010 08:31:01 | 25.922 | 3/29/2010 00:59:00 | 27.5 | 3/21/2010 06:29:01 | 26.074 |
| 3/20/2010 08:51:01 | 25.922 | 3/29/2010 01:34:00 | 27.5 | 3/21/2010 06:49:01 | 26.074 |
| 3/20/2010 09:11:01 | 25.922 | 3/29/2010 02:09:00 | 27.5 | 3/21/2010 07:09:01 | 26.074 |
| 3/20/2010 09:31:01 | 25.922 | 3/29/2010 02:44:00 | 27.0 | 3/21/2010 07:29:01 | 26.074 |
| 3/20/2010 09:51:01 | 25.922 | 3/29/2010 03:19:00 | 27.0 | 3/21/2010 07:49:01 | 26.074 |
| 3/20/2010 10:11:01 | 25.922 | 3/29/2010 03:54:00 | 27.0 | 3/21/2010 08:09:01 | 26.074 |
| 3/20/2010 10:31:01 | 25.922 | 3/29/2010 04:29:00 | 27.0 | 3/21/2010 08:29:01 | 26.074 |
| 3/20/2010 10:51:01 | 25.922 | 3/29/2010 05:04:00 | 27.0 | 3/21/2010 08:49:01 | 26.074 |
| 3/20/2010 11:11:01 | 25.922 | 3/29/2010 05:39:00 | 27.0 | 3/21/2010 09:09:01 | 26.074 |
| 3/20/2010 11:31:01 | 25.922 | 3/29/2010 06:14:00 | 27.0 | 3/21/2010 09:29:01 | 26.012 |
| 3/20/2010 11:51:01 | 25.922 | 3/29/2010 06:49:00 | 27.0 | 3/21/2010 09:49:01 | 26.012 |
| 3/20/2010 12:11:01 | 25.922 | 3/29/2010 07:24:00 | 27.0 | 3/21/2010 10:09:01 | 26.012 |
| 3/20/2010 12:31:01 | 25.922 | 3/29/2010 07:59:00 | 27.0 | 3/21/2010 10:29:01 | 26.012 |
| 3/20/2010 12:51:01 | 25.922 | 3/29/2010 08:34:00 | 27.0 | 3/21/2010 10:49:01 | 26.012 |
| 3/20/2010 13:11:01 | 25.922 | 3/29/2010 09:09:00 | 27.0 | 3/21/2010 11:09:01 | 26.012 |
| 3/20/2010 13:31:01 | 25.922 | 3/29/2010 09:44:00 | 27.0 | 3/21/2010 11:29:01 | 26.012 |
| 3/20/2010 13:51:01 | 25.922 | 3/29/2010 10:19:00 | 27.0 | 3/21/2010 11:49:01 | 26.012 |
| 3/20/2010 14:11:01 | 25.922 | 3/29/2010 10:54:00 | 27.0 | 3/21/2010 12:09:01 | 25.949 |
| 3/20/2010 14:31:01 | 25.922 | 3/29/2010 11:29:00 | 27.0 | 3/21/2010 12:29:01 | 25.949 |
| 3/20/2010 14:51:01 | 25.922 | 3/29/2010 12:04:00 | 27.0 | 3/21/2010 12:49:01 | 25.949 |
| 3/20/2010 15:11:01 | 25.922 | 3/29/2010 12:39:00 | 27.0 | 3/21/2010 13:09:01 | 25.949 |
| 3/20/2010 15:31:01 | 25.922 | 3/29/2010 13:14:00 | 27.0 | 3/21/2010 13:29:01 | 25.949 |
| 3/20/2010 15:51:01 | 25.922 | 3/29/2010 13:49:00 | 27.0 | 3/21/2010 13:49:01 | 25.949 |
| 3/20/2010 16:11:01 | 25.922 | 3/29/2010 14:24:00 | 27.0 | 3/21/2010 14:09:01 | 25.949 |
| 3/20/2010 16:31:01 | 25.922 | 3/29/2010 14:59:00 | 27.0 | 3/21/2010 14:29:01 | 25.949 |
| 3/20/2010 16:51:01 | 25.922 | 3/29/2010 15:34:00 | 27.0 | 3/21/2010 14:49:01 | 25.949 |
| 3/20/2010 17:11:01 | 25.922 | 3/29/2010 16:09:00 | 27.0 | 3/21/2010 15:09:01 | 25.949 |
| 3/20/2010 17:31:01 | 25.859 | 3/29/2010 16:44:00 | 27.0 | 3/21/2010 15:29:01 | 25.949 |
| 3/20/2010 17:51:01 | 25.922 | 3/29/2010 17:19:00 | 27.0 | 3/21/2010 15:49:01 | 25.949 |
| 3/20/2010 18:11:01 | 25.922 | 3/29/2010 17:54:00 | 27.0 | 3/21/2010 16:09:01 | 25.949 |
| 3/20/2010 18:31:01 | 25.922 | 3/29/2010 18:29:00 | 27.5 | 3/21/2010 16:29:01 | 25.949 |
| 3/20/2010 18:51:01 | 25.922 | 3/29/2010 19:04:00 | 27.5 | 3/21/2010 16:49:01 | 25.949 |
| 3/20/2010 19:11:01 | 25.922 | 3/29/2010 19:39:00 | 27.5 | 3/21/2010 17:09:01 | 25.949 |
| 3/20/2010 19:31:01 | 25.859 | 3/29/2010 20:14:00 | 27.5 | 3/21/2010 17:29:01 | 26.012 |
| 3/20/2010 19:51:01 | 25.922 | 3/29/2010 20:49:00 | 27.5 | 3/21/2010 17:49:01 | 26.012 |
| 3/20/2010 20:11:01 | 25.922 | 3/29/2010 21:24:00 | 27.5 | 3/21/2010 18:09:01 | 26.012 |
| 3/20/2010 20:31:01 | 25.922 | 3/29/2010 21:59:00 | 27.5 | 3/21/2010 18:29:01 | 26.012 |
| 3/20/2010 20:51:01 | 25.922 | 3/29/2010 22:34:00 | 27.5 | 3/21/2010 18:49:01 | 26.012 |
| 3/20/2010 21:11:01 | 25.922 | 3/29/2010 23:09:00 | 27.5 | 3/21/2010 19:09:01 | 26.012 |
| 3/20/2010 21:31:01 | 25.922 | 3/29/2010 23:44:00 | 27.0 | 3/21/2010 19:29:01 | 26.012 |
| 3/20/2010 21:51:01 | 25.922 | 3/30/2010 00:19:00 | 27.0 | 3/21/2010 19:49:01 | 26.012 |
| 3/20/2010 22:11:01 | 25.922 | 3/30/2010 00:54:00 | 27.0 | 3/21/2010 20:09:01 | 26.074 |
| 3/20/2010 22:31:01 | 25.922 | 3/30/2010 01:29:00 | 27.0 | 3/21/2010 20:29:01 | 26.074 |
| 3/20/2010 22:51:01 | 25.922 | 3/30/2010 02:04:00 | 27.0 | 3/21/2010 20:49:01 | 26.074 |
| 3/20/2010 23:11:01 | 25.922 | 3/30/2010 02:39:00 | 27.0 | 3/21/2010 21:09:01 | 26.074 |
| 3/20/2010 23:31:01 | 25.922 | 3/30/2010 03:14:00 | 27.0 | 3/21/2010 21:29:01 | 26.074 |

|                    |        |                    |      |                    |        |
|--------------------|--------|--------------------|------|--------------------|--------|
| 3/20/2010 23:51:01 | 25.922 | 3/30/2010 03:49:00 | 27.0 | 3/21/2010 21:49:01 | 26.074 |
| 3/21/2010 00:11:01 | 25.922 | 3/30/2010 04:24:00 | 27.0 | 3/21/2010 22:09:01 | 26.074 |
| 3/21/2010 00:31:01 | 25.922 | 3/30/2010 04:59:00 | 27.0 | 3/21/2010 22:29:01 | 26.074 |
| 3/21/2010 00:51:01 | 25.922 | 3/30/2010 05:34:00 | 27.0 | 3/21/2010 22:49:01 | 26.137 |
| 3/21/2010 01:11:01 | 25.922 | 3/30/2010 06:09:00 | 27.0 | 3/21/2010 23:09:01 | 26.137 |
| 3/21/2010 01:31:01 | 25.922 | 3/30/2010 06:44:00 | 27.0 | 3/21/2010 23:29:01 | 26.137 |
| 3/21/2010 01:51:01 | 25.922 | 3/30/2010 07:19:00 | 27.0 | 3/21/2010 23:49:01 | 26.137 |
| 3/21/2010 02:11:01 | 25.922 | 3/30/2010 07:54:00 | 27.0 | 3/22/2010 00:09:01 | 26.137 |
| 3/21/2010 02:31:01 | 25.922 | 3/30/2010 08:29:00 | 27.0 | 3/22/2010 00:29:01 | 26.137 |
| 3/21/2010 02:51:01 | 25.922 | 3/30/2010 09:04:00 | 27.0 | 3/22/2010 00:49:01 | 26.137 |
| 3/21/2010 03:11:01 | 25.922 | 3/30/2010 09:39:00 | 27.0 | 3/22/2010 01:09:01 | 26.137 |
| 3/21/2010 03:31:01 | 25.922 | 3/30/2010 10:14:00 | 27.0 | 3/22/2010 01:29:01 | 26.137 |
| 3/21/2010 03:51:01 | 25.922 | 3/30/2010 10:49:00 | 27.0 | 3/22/2010 01:49:01 | 26.137 |
| 3/21/2010 04:11:01 | 25.922 | 3/30/2010 11:24:00 | 27.0 | 3/22/2010 02:09:01 | 26.137 |
| 3/21/2010 04:31:01 | 25.922 | 3/30/2010 11:59:00 | 27.0 | 3/22/2010 02:29:01 | 26.137 |
| 3/21/2010 04:51:01 | 25.922 | 3/30/2010 12:34:00 | 27.0 | 3/22/2010 02:49:01 | 26.137 |
| 3/21/2010 05:11:01 | 25.922 | 3/30/2010 13:09:00 | 27.0 | 3/22/2010 03:09:01 | 26.137 |
| 3/21/2010 05:31:01 | 25.922 | 3/30/2010 13:44:00 | 27.0 | 3/22/2010 03:29:01 | 26.137 |
| 3/21/2010 05:51:01 | 25.922 | 3/30/2010 14:19:00 | 27.0 | 3/22/2010 03:49:01 | 26.137 |
| 3/21/2010 06:11:01 | 25.922 | 3/30/2010 14:54:00 | 27.0 | 3/22/2010 04:09:01 | 26.137 |
| 3/21/2010 06:31:01 | 25.922 | 3/30/2010 15:29:00 | 27.0 | 3/22/2010 04:29:01 | 26.199 |
| 3/21/2010 06:51:01 | 25.922 | 3/30/2010 16:04:00 | 27.0 | 3/22/2010 04:49:01 | 26.137 |
| 3/21/2010 07:11:01 | 25.922 | 3/30/2010 16:39:00 | 27.0 | 3/22/2010 05:09:01 | 26.199 |
| 3/21/2010 07:31:01 | 25.922 | 3/30/2010 17:14:00 | 27.0 | 3/22/2010 05:29:01 | 26.199 |
| 3/21/2010 07:51:01 | 25.922 | 3/30/2010 17:49:00 | 27.0 | 3/22/2010 05:49:01 | 26.137 |
| 3/21/2010 08:11:01 | 25.922 | 3/30/2010 18:24:00 | 27.0 | 3/22/2010 06:09:01 | 26.199 |
| 3/21/2010 08:31:01 | 25.922 | 3/30/2010 18:59:00 | 27.0 | 3/22/2010 06:29:01 | 26.137 |
| 3/21/2010 08:51:01 | 25.922 | 3/30/2010 19:34:00 | 27.0 | 3/22/2010 06:49:01 | 26.137 |
| 3/21/2010 09:11:01 | 25.922 | 3/30/2010 20:09:00 | 27.0 | 3/22/2010 07:09:01 | 26.137 |
| 3/21/2010 09:31:01 | 25.859 | 3/30/2010 20:44:00 | 27.0 | 3/22/2010 07:29:01 | 26.137 |
| 3/21/2010 09:51:01 | 25.859 | 3/30/2010 21:19:00 | 27.0 | 3/22/2010 07:49:01 | 26.137 |
| 3/21/2010 10:11:01 | 25.859 | 3/30/2010 21:54:00 | 27.0 | 3/22/2010 08:09:01 | 26.137 |
| 3/21/2010 10:31:01 | 25.859 | 3/30/2010 22:29:00 | 27.0 | 3/22/2010 08:29:01 | 26.137 |
| 3/21/2010 10:51:01 | 25.859 | 3/30/2010 23:04:00 | 27.0 | 3/22/2010 08:49:01 | 26.137 |
| 3/21/2010 11:11:01 | 25.859 | 3/30/2010 23:39:00 | 27.0 | 3/22/2010 09:09:01 | 26.137 |
| 3/21/2010 11:31:01 | 25.859 | 3/31/2010 00:14:00 | 27.0 | 3/22/2010 09:29:01 | 26.137 |
| 3/21/2010 11:51:01 | 25.859 | 3/31/2010 00:49:00 | 27.0 | 3/22/2010 09:49:01 | 26.137 |
| 3/21/2010 12:11:01 | 25.859 | 3/31/2010 01:24:00 | 27.0 | 3/22/2010 10:09:01 | 26.137 |
| 3/21/2010 12:31:01 | 25.859 | 3/31/2010 01:59:00 | 27.0 | 3/22/2010 10:29:01 | 26.137 |
| 3/21/2010 12:51:01 | 25.859 | 3/31/2010 02:34:00 | 27.0 | 3/22/2010 10:49:01 | 26.137 |
| 3/21/2010 13:11:01 | 25.859 | 3/31/2010 03:09:00 | 27.0 | 3/22/2010 11:09:01 | 26.137 |
| 3/21/2010 13:31:01 | 25.859 | 3/31/2010 03:44:00 | 27.0 | 3/22/2010 11:29:01 | 26.137 |
| 3/21/2010 13:51:01 | 25.859 | 3/31/2010 04:19:00 | 27.0 | 3/22/2010 11:49:01 | 26.137 |
| 3/21/2010 14:11:01 | 25.859 | 3/31/2010 04:54:00 | 26.5 | 3/22/2010 12:09:01 | 26.137 |
| 3/21/2010 14:31:01 | 25.797 | 3/31/2010 05:29:00 | 26.5 | 3/22/2010 12:29:01 | 26.137 |
| 3/21/2010 14:51:01 | 25.797 | 3/31/2010 06:04:00 | 26.5 | 3/22/2010 12:49:01 | 26.137 |
| 3/21/2010 15:11:01 | 25.797 | 3/31/2010 06:39:00 | 26.5 | 3/22/2010 13:09:01 | 26.137 |
| 3/21/2010 15:31:01 | 25.797 | 3/31/2010 07:14:00 | 26.5 | 3/22/2010 13:29:01 | 26.137 |
| 3/21/2010 15:51:01 | 25.797 | 3/31/2010 07:49:00 | 26.5 | 3/22/2010 13:49:01 | 26.137 |
| 3/21/2010 16:11:01 | 25.797 | 3/31/2010 08:24:00 | 26.5 | 3/22/2010 14:09:01 | 26.137 |

|                    |        |                    |      |                    |        |
|--------------------|--------|--------------------|------|--------------------|--------|
| 3/21/2010 16:31:01 | 25.797 | 3/31/2010 08:59:00 | 26.5 | 3/22/2010 14:29:01 | 26.137 |
| 3/21/2010 16:51:01 | 25.797 | 3/31/2010 09:34:00 | 26.5 | 3/22/2010 14:49:01 | 26.137 |
| 3/21/2010 17:11:01 | 25.797 | 3/31/2010 10:09:00 | 26.5 | 3/22/2010 15:09:01 | 26.137 |
| 3/21/2010 17:31:01 | 25.797 | 3/31/2010 10:44:00 | 26.5 | 3/22/2010 15:29:01 | 26.137 |
| 3/21/2010 17:51:01 | 25.797 | 3/31/2010 11:19:00 | 26.5 | 3/22/2010 15:49:01 | 26.137 |
| 3/21/2010 18:11:01 | 25.797 | 3/31/2010 11:54:00 | 26.5 | 3/22/2010 16:09:01 | 26.137 |
| 3/21/2010 18:31:01 | 25.797 | 3/31/2010 12:29:00 | 26.5 | 3/22/2010 16:29:01 | 26.137 |
| 3/21/2010 18:51:01 | 25.797 | 3/31/2010 13:04:00 | 26.5 | 3/22/2010 16:49:01 | 26.137 |
| 3/21/2010 19:11:01 | 25.797 | 3/31/2010 13:39:00 | 26.5 | 3/22/2010 17:09:01 | 26.137 |
| 3/21/2010 19:31:01 | 25.797 | 3/31/2010 14:14:00 | 26.5 | 3/22/2010 17:29:01 | 26.137 |
| 3/21/2010 19:51:01 | 25.797 | 3/31/2010 14:49:00 | 27.0 | 3/22/2010 17:49:01 | 26.199 |
| 3/21/2010 20:11:01 | 25.797 | 3/31/2010 15:24:00 | 27.0 | 3/22/2010 18:09:01 | 26.199 |
| 3/21/2010 20:31:01 | 25.859 | 3/31/2010 15:59:00 | 27.0 | 3/22/2010 18:29:01 | 26.199 |
| 3/21/2010 20:51:01 | 25.859 | 3/31/2010 16:34:00 | 27.0 | 3/22/2010 18:49:01 | 26.199 |
| 3/21/2010 21:11:01 | 25.859 | 3/31/2010 17:09:00 | 27.0 | 3/22/2010 19:09:01 | 26.199 |
| 3/21/2010 21:31:01 | 25.859 | 3/31/2010 17:44:00 | 27.0 | 3/22/2010 19:29:01 | 26.199 |
| 3/21/2010 21:51:01 | 25.859 | 3/31/2010 18:19:00 | 27.0 | 3/22/2010 19:49:01 | 26.199 |
| 3/21/2010 22:11:01 | 25.859 | 3/31/2010 18:54:00 | 27.0 | 3/22/2010 20:09:01 | 26.199 |
| 3/21/2010 22:31:01 | 25.859 | 3/31/2010 19:29:00 | 27.0 | 3/22/2010 20:29:01 | 26.199 |
| 3/21/2010 22:51:01 | 25.859 | 3/31/2010 20:04:00 | 27.0 | 3/22/2010 20:49:01 | 26.199 |
| 3/21/2010 23:11:01 | 25.859 | 3/31/2010 20:39:00 | 27.0 | 3/22/2010 21:09:01 | 26.199 |
| 3/21/2010 23:31:01 | 25.859 | 3/31/2010 21:14:00 | 26.5 | 3/22/2010 21:29:01 | 26.199 |
| 3/21/2010 23:51:01 | 25.859 | 3/31/2010 21:49:00 | 27.0 | 3/22/2010 21:49:01 | 26.199 |
| 3/22/2010 00:11:01 | 25.859 | 3/31/2010 22:24:00 | 27.0 | 3/22/2010 22:09:01 | 26.199 |
| 3/22/2010 00:31:01 | 25.859 | 3/31/2010 22:59:00 | 27.0 | 3/22/2010 22:29:01 | 26.262 |
| 3/22/2010 00:51:01 | 25.859 | 3/31/2010 23:34:00 | 27.0 | 3/22/2010 22:49:01 | 26.262 |
| 3/22/2010 01:11:01 | 25.859 | 4/1/2010 00:09:00  | 26.5 | 3/22/2010 23:09:01 | 26.262 |
| 3/22/2010 01:31:01 | 25.859 | 4/1/2010 00:44:00  | 26.5 | 3/22/2010 23:29:01 | 26.262 |
| 3/22/2010 01:51:01 | 25.859 | 4/1/2010 01:19:00  | 26.5 | 3/22/2010 23:49:01 | 26.262 |
| 3/22/2010 02:11:01 | 25.859 | 4/1/2010 01:54:00  | 26.5 | 3/23/2010 00:09:01 | 26.262 |
| 3/22/2010 02:31:01 | 25.859 | 4/1/2010 02:29:00  | 27.0 | 3/23/2010 00:29:01 | 26.262 |
| 3/22/2010 02:51:01 | 25.922 | 4/1/2010 03:04:00  | 27.0 | 3/23/2010 00:49:01 | 26.262 |
| 3/22/2010 03:11:01 | 25.922 | 4/1/2010 03:39:00  | 26.5 | 3/23/2010 01:09:01 | 26.262 |
| 3/22/2010 03:31:01 | 25.859 | 4/1/2010 04:14:00  | 26.5 | 3/23/2010 01:29:01 | 26.262 |
| 3/22/2010 03:51:01 | 25.922 | 4/1/2010 04:49:00  | 26.5 | 3/23/2010 01:49:01 | 26.262 |
| 3/22/2010 04:11:01 | 25.922 | 4/1/2010 05:24:00  | 26.5 | 3/23/2010 02:09:01 | 26.262 |
| 3/22/2010 04:31:01 | 25.922 | 4/1/2010 05:59:00  | 26.5 | 3/23/2010 02:29:01 | 26.262 |
| 3/22/2010 04:51:01 | 25.922 | 4/1/2010 06:34:00  | 26.5 | 3/23/2010 02:49:01 | 26.262 |
| 3/22/2010 05:11:01 | 25.922 | 4/1/2010 07:09:00  | 26.5 | 3/23/2010 03:09:01 | 26.262 |
| 3/22/2010 05:31:01 | 25.922 | 4/1/2010 07:44:00  | 26.0 | 3/23/2010 03:29:01 | 26.199 |
| 3/22/2010 05:51:01 | 25.922 | 4/1/2010 08:19:00  | 26.0 | 3/23/2010 03:49:01 | 26.199 |
| 3/22/2010 06:11:01 | 25.922 | 4/1/2010 08:54:00  | 26.0 | 3/23/2010 04:09:01 | 26.199 |
| 3/22/2010 06:31:01 | 25.922 | 4/1/2010 09:29:00  | 26.5 | 3/23/2010 04:29:01 | 26.199 |
| 3/22/2010 06:51:01 | 25.922 | 4/1/2010 10:04:00  | 26.5 | 3/23/2010 04:49:01 | 26.199 |
| 3/22/2010 07:11:01 | 25.922 | 4/1/2010 10:39:00  | 26.5 | 3/23/2010 05:09:01 | 26.199 |
| 3/22/2010 07:31:01 | 25.922 | 4/1/2010 11:14:00  | 26.5 | 3/23/2010 05:29:01 | 26.199 |
| 3/22/2010 07:51:01 | 25.922 | 4/1/2010 11:49:00  | 26.5 | 3/23/2010 05:49:01 | 26.199 |
| 3/22/2010 08:11:01 | 25.922 | 4/1/2010 12:24:00  | 26.5 | 3/23/2010 06:09:01 | 26.199 |
| 3/22/2010 08:31:01 | 25.922 | 4/1/2010 12:59:00  | 26.5 | 3/23/2010 06:29:01 | 26.199 |
| 3/22/2010 08:51:01 | 25.922 | 4/1/2010 13:34:00  | 26.5 | 3/23/2010 06:49:01 | 26.199 |



|                    |                          |                         |        |
|--------------------|--------------------------|-------------------------|--------|
| 3/22/2010 09:11:01 | 25.922 4/1/2010 14:09:00 | 26.5 3/23/2010 07:09:01 | 26.137 |
| 3/22/2010 09:31:01 | 25.922 4/1/2010 14:44:00 | 26.5 3/23/2010 07:29:01 | 26.137 |
| 3/22/2010 09:51:01 | 25.922 4/1/2010 15:19:00 | 26.5 3/23/2010 07:49:01 | 26.137 |
| 3/22/2010 10:11:01 | 25.922 4/1/2010 15:54:00 | 26.5 3/23/2010 08:09:01 | 26.137 |
| 3/22/2010 10:31:01 | 25.922 4/1/2010 16:29:00 | 26.5 3/23/2010 08:29:01 | 26.137 |
| 3/22/2010 10:51:01 | 25.922 4/1/2010 17:04:00 | 26.5 3/23/2010 08:49:01 | 26.137 |
| 3/22/2010 11:11:01 | 25.922 4/1/2010 17:39:00 | 26.5 3/23/2010 09:09:01 | 26.137 |
| 3/22/2010 11:31:01 | 25.859 4/1/2010 18:14:00 | 26.5 3/23/2010 09:29:01 | 26.137 |
| 3/22/2010 11:51:01 | 25.922 4/1/2010 18:49:00 | 26.5 3/23/2010 09:49:01 | 26.074 |
| 3/22/2010 12:11:01 | 25.859 4/1/2010 19:24:00 | 26.5 3/23/2010 10:09:01 | 26.074 |
| 3/22/2010 12:31:01 | 25.859 4/1/2010 19:59:00 | 26.5 3/23/2010 10:29:01 | 26.074 |
| 3/22/2010 12:51:01 | 25.922 4/1/2010 20:34:00 | 26.5 3/23/2010 10:49:01 | 26.074 |
| 3/22/2010 13:11:01 | 25.859 4/1/2010 21:09:00 | 27.0 3/23/2010 11:09:01 | 26.074 |
| 3/22/2010 13:31:01 | 25.859 4/1/2010 21:44:00 | 27.0 3/23/2010 11:29:01 | 26.074 |
| 3/22/2010 13:51:01 | 25.859 4/1/2010 22:19:00 | 27.0 3/23/2010 11:49:01 | 26.074 |
| 3/22/2010 14:11:01 | 25.922 4/1/2010 22:54:00 | 26.5 3/23/2010 12:09:01 | 26.074 |
| 3/22/2010 14:31:01 | 25.859 4/1/2010 23:29:00 | 26.5 3/23/2010 12:29:01 | 26.012 |
| 3/22/2010 14:51:01 | 25.859 4/2/2010 00:04:00 | 26.5 3/23/2010 12:49:01 | 26.012 |
| 3/22/2010 15:11:01 | 25.859 4/2/2010 00:39:00 | 26.5 3/23/2010 13:09:01 | 26.012 |
| 3/22/2010 15:31:01 | 25.859 4/2/2010 01:14:00 | 26.5 3/23/2010 13:29:01 | 26.012 |
| 3/22/2010 15:51:01 | 25.859 4/2/2010 01:49:00 | 26.5 3/23/2010 13:49:01 | 26.012 |
| 3/22/2010 16:11:01 | 25.859 4/2/2010 02:24:00 | 26.5 3/23/2010 14:09:01 | 26.012 |
| 3/22/2010 16:31:01 | 25.922 4/2/2010 02:59:00 | 26.5 3/23/2010 14:29:01 | 26.012 |
| 3/22/2010 16:51:01 | 25.859 4/2/2010 03:34:00 | 26.5 3/23/2010 14:49:01 | 26.012 |
| 3/22/2010 17:11:01 | 25.922 4/2/2010 04:09:00 | 26.5 3/23/2010 15:09:01 | 26.012 |
| 3/22/2010 17:31:01 | 25.922 4/2/2010 04:44:00 | 26.5 3/23/2010 15:29:01 | 26.012 |
| 3/22/2010 17:51:01 | 25.922 4/2/2010 05:19:00 | 26.5 3/23/2010 15:49:01 | 26.012 |
| 3/22/2010 18:11:01 | 25.922 4/2/2010 05:54:00 | 26.5 3/23/2010 16:09:01 | 26.012 |
| 3/22/2010 18:31:01 | 25.922 4/2/2010 06:29:00 | 26.5 3/23/2010 16:29:01 | 26.012 |
| 3/22/2010 18:51:01 | 25.922 4/2/2010 07:04:00 | 26.5 3/23/2010 16:49:01 | 26.012 |
| 3/22/2010 19:11:01 | 25.922 4/2/2010 07:39:00 | 26.5 3/23/2010 17:09:01 | 26.012 |
| 3/22/2010 19:31:01 | 25.922 4/2/2010 08:14:00 | 26.5 3/23/2010 17:29:01 | 26.012 |
| 3/22/2010 19:51:01 | 25.922 4/2/2010 08:49:00 | 26.5 3/23/2010 17:49:01 | 26.074 |
| 3/22/2010 20:11:01 | 25.922 4/2/2010 09:24:00 | 26.5 3/23/2010 18:09:01 | 26.074 |
| 3/22/2010 20:31:01 | 25.922 4/2/2010 09:59:00 | 26.5 3/23/2010 18:29:01 | 26.074 |
| 3/22/2010 20:51:01 | 25.922 4/2/2010 10:34:00 | 26.5 3/23/2010 18:49:01 | 26.074 |
| 3/22/2010 21:11:01 | 25.922 4/2/2010 11:09:00 | 26.5 3/23/2010 19:09:01 | 26.074 |
| 3/22/2010 21:31:01 | 25.922 4/2/2010 11:44:00 | 26.5 3/23/2010 19:29:01 | 26.074 |
| 3/22/2010 21:51:01 | 25.922 4/2/2010 12:19:00 | 26.5 3/23/2010 19:49:01 | 26.074 |
| 3/22/2010 22:11:01 | 25.922 4/2/2010 12:54:00 | 26.5 3/23/2010 20:09:01 | 26.137 |
| 3/22/2010 22:31:01 | 25.922 4/2/2010 13:29:00 | 26.5 3/23/2010 20:29:01 | 26.137 |
| 3/22/2010 22:51:01 | 25.922 4/2/2010 14:04:00 | 26.5 3/23/2010 20:49:01 | 26.137 |
| 3/22/2010 23:11:01 | 25.922 4/2/2010 14:39:00 | 26.5 3/23/2010 21:09:01 | 26.137 |
| 3/22/2010 23:31:01 | 25.922 4/2/2010 15:14:00 | 26.5 3/23/2010 21:29:01 | 26.137 |
| 3/22/2010 23:51:01 | 25.922 4/2/2010 15:49:00 | 26.5 3/23/2010 21:49:01 | 26.137 |
| 3/23/2010 00:11:01 | 25.922 4/2/2010 16:24:00 | 26.5 3/23/2010 22:09:01 | 26.137 |
| 3/23/2010 00:31:01 | 25.922 4/2/2010 16:59:00 | 26.5 3/23/2010 22:29:01 | 26.199 |
| 3/23/2010 00:51:01 | 25.922 4/2/2010 17:34:00 | 26.5 3/23/2010 22:49:01 | 26.199 |
| 3/23/2010 01:11:01 | 25.922 4/2/2010 18:09:00 | 26.5 3/23/2010 23:09:01 | 26.199 |
| 3/23/2010 01:31:01 | 25.922 4/2/2010 18:44:00 | 27.0 3/23/2010 23:29:01 | 26.199 |

|                    |        |                   |      |                    |        |
|--------------------|--------|-------------------|------|--------------------|--------|
| 3/23/2010 01:51:01 | 25.922 | 4/2/2010 19:19:00 | 27.0 | 3/23/2010 23:49:01 | 26.199 |
| 3/23/2010 02:11:01 | 25.922 | 4/2/2010 19:54:00 | 27.0 | 3/24/2010 00:09:01 | 26.199 |
| 3/23/2010 02:31:01 | 25.922 | 4/2/2010 20:29:00 | 27.0 | 3/24/2010 00:29:01 | 26.199 |
| 3/23/2010 02:51:01 | 25.984 | 4/2/2010 21:04:00 | 26.5 | 3/24/2010 00:49:01 | 26.199 |
| 3/23/2010 03:11:01 | 25.922 | 4/2/2010 21:39:00 | 27.0 | 3/24/2010 01:09:01 | 26.199 |
| 3/23/2010 03:31:01 | 25.922 | 4/2/2010 22:14:00 | 27.0 | 3/24/2010 01:29:01 | 26.199 |
| 3/23/2010 03:51:01 | 25.922 | 4/2/2010 22:49:00 | 27.0 | 3/24/2010 01:49:01 | 26.199 |
| 3/23/2010 04:11:01 | 25.922 | 4/2/2010 23:24:00 | 27.0 | 3/24/2010 02:09:01 | 26.199 |
| 3/23/2010 04:31:01 | 25.922 | 4/2/2010 23:59:00 | 27.0 | 3/24/2010 02:29:01 | 26.199 |
| 3/23/2010 04:51:01 | 25.922 | 4/3/2010 00:34:00 | 27.0 | 3/24/2010 02:49:01 | 26.199 |
| 3/23/2010 05:11:01 | 25.922 | 4/3/2010 01:09:00 | 27.0 | 3/24/2010 03:09:01 | 26.199 |
| 3/23/2010 05:31:01 | 25.922 | 4/3/2010 01:44:00 | 26.5 | 3/24/2010 03:29:01 | 26.199 |
| 3/23/2010 05:51:01 | 25.922 | 4/3/2010 02:19:00 | 26.5 | 3/24/2010 03:49:01 | 26.199 |
| 3/23/2010 06:11:01 | 25.922 | 4/3/2010 02:54:00 | 26.5 | 3/24/2010 04:09:01 | 26.199 |
| 3/23/2010 06:31:01 | 25.922 | 4/3/2010 03:29:00 | 26.5 | 3/24/2010 04:29:01 | 26.199 |
| 3/23/2010 06:51:01 | 25.922 | 4/3/2010 04:04:00 | 26.5 | 3/24/2010 04:49:01 | 26.199 |
| 3/23/2010 07:11:01 | 25.922 | 4/3/2010 04:39:00 | 26.5 | 3/24/2010 05:09:01 | 26.199 |
| 3/23/2010 07:31:01 | 25.922 | 4/3/2010 05:14:00 | 26.5 | 3/24/2010 05:29:01 | 26.199 |
| 3/23/2010 07:51:01 | 25.922 | 4/3/2010 05:49:00 | 26.5 | 3/24/2010 05:49:01 | 26.199 |
| 3/23/2010 08:11:01 | 25.922 | 4/3/2010 06:24:00 | 26.5 | 3/24/2010 06:09:01 | 26.137 |
| 3/23/2010 08:31:01 | 25.922 | 4/3/2010 06:59:00 | 26.5 | 3/24/2010 06:29:01 | 26.137 |
| 3/23/2010 08:51:01 | 25.922 | 4/3/2010 07:34:00 | 26.5 | 3/24/2010 06:49:01 | 26.137 |
| 3/23/2010 09:11:01 | 25.922 | 4/3/2010 08:09:00 | 26.5 | 3/24/2010 07:09:01 | 26.137 |
| 3/23/2010 09:31:01 | 25.922 | 4/3/2010 08:44:00 | 26.5 | 3/24/2010 07:29:01 | 26.137 |
| 3/23/2010 09:51:01 | 25.922 | 4/3/2010 09:19:00 | 26.5 | 3/24/2010 07:49:01 | 26.137 |
| 3/23/2010 10:11:01 | 25.922 | 4/3/2010 09:54:00 | 26.5 | 3/24/2010 08:09:01 | 26.137 |
| 3/23/2010 10:31:01 | 25.922 | 4/3/2010 10:29:00 | 26.5 | 3/24/2010 08:29:01 | 26.074 |
| 3/23/2010 10:51:01 | 25.859 | 4/3/2010 11:04:00 | 26.5 | 3/24/2010 08:49:01 | 26.074 |
| 3/23/2010 11:11:01 | 25.859 | 4/3/2010 11:39:00 | 26.5 | 3/24/2010 09:09:01 | 26.074 |
| 3/23/2010 11:31:01 | 25.859 | 4/3/2010 12:14:00 | 26.5 | 3/24/2010 09:29:01 | 26.074 |
| 3/23/2010 11:51:01 | 25.859 | 4/3/2010 12:49:00 | 26.5 | 3/24/2010 09:49:01 | 26.074 |
| 3/23/2010 12:11:01 | 25.859 | 4/3/2010 13:24:00 | 26.5 | 3/24/2010 10:09:01 | 26.074 |
| 3/23/2010 12:31:01 | 25.859 | 4/3/2010 13:59:00 | 26.5 | 3/24/2010 10:29:01 | 26.074 |
| 3/23/2010 12:51:01 | 25.859 | 4/3/2010 14:34:00 | 26.5 | 3/24/2010 10:49:01 | 26.074 |
| 3/23/2010 13:11:01 | 25.859 | 4/3/2010 15:09:00 | 26.5 | 3/24/2010 11:09:01 | 26.074 |
| 3/23/2010 13:31:01 | 25.859 | 4/3/2010 15:44:00 | 26.5 | 3/24/2010 11:29:01 | 26.012 |
| 3/23/2010 13:51:01 | 25.859 | 4/3/2010 16:19:00 | 26.5 | 3/24/2010 11:49:01 | 26.012 |
| 3/23/2010 14:11:01 | 25.859 | 4/3/2010 16:54:00 | 26.5 | 3/24/2010 12:09:01 | 26.012 |
| 3/23/2010 14:31:01 | 25.859 | 4/3/2010 17:29:00 | 27.0 | 3/24/2010 12:29:01 | 26.012 |
| 3/23/2010 14:51:01 | 25.859 | 4/3/2010 18:04:00 | 27.0 | 3/24/2010 12:49:01 | 26.012 |
| 3/23/2010 15:11:01 | 25.859 | 4/3/2010 18:39:00 | 27.0 | 3/24/2010 13:09:01 | 26.012 |
| 3/23/2010 15:31:01 | 25.859 | 4/3/2010 19:14:00 | 27.0 | 3/24/2010 13:29:01 | 26.012 |
| 3/23/2010 15:51:01 | 25.859 | 4/3/2010 19:49:00 | 27.0 | 3/24/2010 13:49:01 | 26.012 |
| 3/23/2010 16:11:01 | 25.797 | 4/3/2010 20:24:00 | 27.0 | 3/24/2010 14:09:01 | 26.012 |
| 3/23/2010 16:31:01 | 25.859 | 4/3/2010 20:59:00 | 27.0 | 3/24/2010 14:29:01 | 26.012 |
| 3/23/2010 16:51:01 | 25.797 | 4/3/2010 21:34:00 | 27.0 | 3/24/2010 14:49:01 | 26.012 |
| 3/23/2010 17:11:01 | 25.797 | 4/3/2010 22:09:00 | 27.0 | 3/24/2010 15:09:01 | 26.012 |
| 3/23/2010 17:31:01 | 25.797 | 4/3/2010 22:44:00 | 27.0 | 3/24/2010 15:29:01 | 26.012 |
| 3/23/2010 17:51:01 | 25.797 | 4/3/2010 23:19:00 | 27.0 | 3/24/2010 15:49:01 | 26.012 |
| 3/23/2010 18:11:01 | 25.797 | 4/3/2010 23:54:00 | 27.0 | 3/24/2010 16:09:01 | 26.012 |

|                    |        |                   |      |                    |        |
|--------------------|--------|-------------------|------|--------------------|--------|
| 3/23/2010 18:31:01 | 25.797 | 4/4/2010 00:29:00 | 27.0 | 3/24/2010 16:29:01 | 26.012 |
| 3/23/2010 18:51:01 | 25.859 | 4/4/2010 01:04:00 | 27.0 | 3/24/2010 16:49:01 | 26.012 |
| 3/23/2010 19:11:01 | 25.797 | 4/4/2010 01:39:00 | 27.0 | 3/24/2010 17:09:01 | 26.012 |
| 3/23/2010 19:31:01 | 25.859 | 4/4/2010 02:14:00 | 27.0 | 3/24/2010 17:29:01 | 26.012 |
| 3/23/2010 19:51:01 | 25.859 | 4/4/2010 02:49:00 | 27.0 | 3/24/2010 17:49:01 | 26.012 |
| 3/23/2010 20:11:01 | 25.859 | 4/4/2010 03:24:00 | 27.0 | 3/24/2010 18:09:01 | 26.074 |
| 3/23/2010 20:31:01 | 25.859 | 4/4/2010 03:59:00 | 27.0 | 3/24/2010 18:29:01 | 26.074 |
| 3/23/2010 20:51:01 | 25.859 | 4/4/2010 04:34:00 | 27.0 | 3/24/2010 18:49:01 | 26.074 |
| 3/23/2010 21:11:01 | 25.859 | 4/4/2010 05:09:00 | 27.0 | 3/24/2010 19:09:01 | 26.074 |
| 3/23/2010 21:31:01 | 25.859 | 4/4/2010 05:44:00 | 27.0 | 3/24/2010 19:29:01 | 26.074 |
| 3/23/2010 21:51:01 | 25.859 | 4/4/2010 06:19:00 | 26.5 | 3/24/2010 19:49:01 | 26.074 |
| 3/23/2010 22:11:01 | 25.859 | 4/4/2010 06:54:00 | 26.5 | 3/24/2010 20:09:01 | 26.074 |
| 3/23/2010 22:31:01 | 25.859 | 4/4/2010 07:29:00 | 26.5 | 3/24/2010 20:29:01 | 26.137 |
| 3/23/2010 22:51:01 | 25.859 | 4/4/2010 08:04:00 | 26.5 | 3/24/2010 20:49:01 | 26.137 |
| 3/23/2010 23:11:01 | 25.859 | 4/4/2010 08:39:00 | 26.5 | 3/24/2010 21:09:01 | 26.137 |
| 3/23/2010 23:31:01 | 25.859 | 4/4/2010 09:14:00 | 26.5 | 3/24/2010 21:29:01 | 26.137 |
| 3/23/2010 23:51:01 | 25.859 | 4/4/2010 09:49:00 | 26.5 | 3/24/2010 21:49:01 | 26.137 |
| 3/24/2010 00:11:01 | 25.859 | 4/4/2010 10:24:00 | 26.5 | 3/24/2010 22:09:01 | 26.137 |
| 3/24/2010 00:31:01 | 25.859 | 4/4/2010 10:59:00 | 26.5 | 3/24/2010 22:29:01 | 26.137 |
| 3/24/2010 00:51:01 | 25.859 | 4/4/2010 11:34:00 | 26.5 | 3/24/2010 22:49:01 | 26.199 |
| 3/24/2010 01:11:01 | 25.859 | 4/4/2010 12:09:00 | 26.5 | 3/24/2010 23:09:01 | 26.199 |
| 3/24/2010 01:31:01 | 25.859 | 4/4/2010 12:44:00 | 26.5 | 3/24/2010 23:29:01 | 26.199 |
| 3/24/2010 01:51:01 | 25.859 | 4/4/2010 13:19:00 | 26.5 | 3/24/2010 23:49:01 | 26.199 |
| 3/24/2010 02:11:01 | 25.859 | 4/4/2010 13:54:00 | 26.5 | 3/25/2010 00:09:01 | 26.199 |
| 3/24/2010 02:31:01 | 25.859 | 4/4/2010 14:29:00 | 26.5 | 3/25/2010 00:29:01 | 26.199 |
| 3/24/2010 02:51:01 | 25.859 | 4/4/2010 15:04:00 | 26.5 | 3/25/2010 00:49:01 | 26.199 |
| 3/24/2010 03:11:01 | 25.859 | 4/4/2010 15:39:00 | 27.0 | 3/25/2010 01:09:01 | 26.199 |
| 3/24/2010 03:31:01 | 25.859 | 4/4/2010 16:14:00 | 27.0 | 3/25/2010 01:29:01 | 26.199 |
| 3/24/2010 03:51:01 | 25.859 | 4/4/2010 16:49:00 | 27.0 | 3/25/2010 01:49:01 | 26.199 |
| 3/24/2010 04:11:01 | 25.859 | 4/4/2010 17:24:00 | 27.0 | 3/25/2010 02:09:01 | 26.262 |
| 3/24/2010 04:31:01 | 25.859 | 4/4/2010 17:59:00 | 27.0 | 3/25/2010 02:29:01 | 26.262 |
| 3/24/2010 04:51:01 | 25.859 | 4/4/2010 18:34:00 | 27.0 | 3/25/2010 02:49:01 | 26.199 |
| 3/24/2010 05:11:01 | 25.859 | 4/4/2010 19:09:00 | 27.0 | 3/25/2010 03:09:01 | 26.262 |
| 3/24/2010 05:31:01 | 25.859 | 4/4/2010 19:44:00 | 27.0 | 3/25/2010 03:29:01 | 26.199 |
| 3/24/2010 05:51:01 | 25.859 | 4/4/2010 20:19:00 | 27.0 | 3/25/2010 03:49:01 | 26.262 |
| 3/24/2010 06:11:01 | 25.859 | 4/4/2010 20:54:00 | 27.0 | 3/25/2010 04:09:01 | 26.199 |
| 3/24/2010 06:31:01 | 25.859 | 4/4/2010 21:29:00 | 27.0 | 3/25/2010 04:29:01 | 26.199 |
| 3/24/2010 06:51:01 | 25.859 | 4/4/2010 22:04:00 | 27.0 | 3/25/2010 04:49:01 | 26.199 |
| 3/24/2010 07:11:01 | 25.859 | 4/4/2010 22:39:00 | 27.0 | 3/25/2010 05:09:01 | 26.199 |
| 3/24/2010 07:31:01 | 25.859 | 4/4/2010 23:14:00 | 27.0 | 3/25/2010 05:29:01 | 26.199 |
| 3/24/2010 07:51:01 | 25.859 | 4/4/2010 23:49:00 | 27.0 | 3/25/2010 05:49:01 | 26.199 |
| 3/24/2010 08:11:01 | 25.859 | 4/5/2010 00:24:00 | 27.0 | 3/25/2010 06:09:01 | 26.199 |
| 3/24/2010 08:31:01 | 25.859 | 4/5/2010 00:59:00 | 27.0 | 3/25/2010 06:29:01 | 26.199 |
| 3/24/2010 08:51:01 | 25.859 | 4/5/2010 01:34:00 | 26.5 | 3/25/2010 06:49:01 | 26.199 |
| 3/24/2010 09:11:01 | 25.859 | 4/5/2010 02:09:00 | 26.5 | 3/25/2010 07:09:01 | 26.199 |
| 3/24/2010 09:31:01 | 25.797 | 4/5/2010 02:44:00 | 26.5 | 3/25/2010 07:29:01 | 26.199 |
| 3/24/2010 09:51:01 | 25.797 | 4/5/2010 03:19:00 | 26.5 | 3/25/2010 07:49:01 | 26.199 |
| 3/24/2010 10:11:01 | 25.797 | 4/5/2010 03:54:00 | 26.5 | 3/25/2010 08:09:01 | 26.199 |
| 3/24/2010 10:31:01 | 25.797 | 4/5/2010 04:29:00 | 26.5 | 3/25/2010 08:29:01 | 26.137 |
| 3/24/2010 10:51:01 | 25.797 | 4/5/2010 05:04:00 | 26.5 | 3/25/2010 08:49:01 | 26.137 |

|                    |                          |                         |        |
|--------------------|--------------------------|-------------------------|--------|
| 3/24/2010 11:11:01 | 25.797 4/5/2010 05:39:00 | 26.5 3/25/2010 09:09:01 | 26.137 |
| 3/24/2010 11:31:01 | 25.797 4/5/2010 06:14:00 | 26.5 3/25/2010 09:29:01 | 26.137 |
| 3/24/2010 11:51:01 | 25.797 4/5/2010 06:49:00 | 26.5 3/25/2010 09:49:01 | 26.137 |
| 3/24/2010 12:11:01 | 25.797 4/5/2010 07:24:00 | 26.5 3/25/2010 10:09:01 | 26.137 |
| 3/24/2010 12:31:01 | 25.797 4/5/2010 07:59:00 | 26.5 3/25/2010 10:29:01 | 26.137 |
| 3/24/2010 12:51:01 | 25.797 4/5/2010 08:34:00 | 26.0 3/25/2010 10:49:01 | 26.137 |
| 3/24/2010 13:11:01 | 25.797 4/5/2010 09:09:00 | 26.0 3/25/2010 11:09:01 | 26.137 |
| 3/24/2010 13:31:01 | 25.797 4/5/2010 09:44:00 | 26.0 3/25/2010 11:29:01 | 26.137 |
| 3/24/2010 13:51:01 | 25.797 4/5/2010 10:19:00 | 26.0 3/25/2010 11:49:01 | 26.137 |
| 3/24/2010 14:11:01 | 25.734 4/5/2010 10:54:00 | 26.0 3/25/2010 12:09:01 | 26.137 |
| 3/24/2010 14:31:01 | 25.734 4/5/2010 11:29:00 | 26.0 3/25/2010 12:29:01 | 26.074 |
| 3/24/2010 14:51:01 | 25.734 4/5/2010 12:04:00 | 26.0 3/25/2010 12:49:01 | 26.074 |
| 3/24/2010 15:11:01 | 25.734 4/5/2010 12:39:00 | 26.0 3/25/2010 13:09:01 | 26.074 |
| 3/24/2010 15:31:01 | 25.734 4/5/2010 13:14:00 | 26.0 3/25/2010 13:29:01 | 26.074 |
| 3/24/2010 15:51:01 | 25.734 4/5/2010 13:49:00 | 26.5 3/25/2010 13:49:01 | 26.074 |
| 3/24/2010 16:11:01 | 25.734 4/5/2010 14:24:00 | 26.5 3/25/2010 14:09:01 | 26.074 |
| 3/24/2010 16:31:01 | 25.734 4/5/2010 14:59:00 | 26.5 3/25/2010 14:29:01 | 26.074 |
| 3/24/2010 16:51:01 | 25.734 4/5/2010 15:34:00 | 26.5 3/25/2010 14:49:01 | 26.074 |
| 3/24/2010 17:11:01 | 25.734 4/5/2010 16:09:00 | 26.5 3/25/2010 15:09:01 | 26.074 |
| 3/24/2010 17:31:01 | 25.734 4/5/2010 16:44:00 | 26.5 3/25/2010 15:29:01 | 26.074 |
| 3/24/2010 17:51:01 | 25.734 4/5/2010 17:19:00 | 26.5 3/25/2010 15:49:01 | 26.074 |
| 3/24/2010 18:11:01 | 25.734 4/5/2010 17:54:00 | 26.5 3/25/2010 16:09:01 | 26.137 |
| 3/24/2010 18:31:01 | 25.734 4/5/2010 18:29:00 | 26.5 3/25/2010 16:29:01 | 26.137 |
| 3/24/2010 18:51:01 | 25.734 4/5/2010 19:04:00 | 27.0 3/25/2010 16:49:01 | 26.137 |
| 3/24/2010 19:11:01 | 25.734 4/5/2010 19:39:00 | 27.0 3/25/2010 17:09:01 | 26.137 |
| 3/24/2010 19:31:01 | 25.734 4/5/2010 20:14:00 | 27.0 3/25/2010 17:29:01 | 26.137 |
| 3/24/2010 19:51:01 | 25.734 4/5/2010 20:49:00 | 27.0 3/25/2010 17:49:01 | 26.137 |
| 3/24/2010 20:11:01 | 25.734 4/5/2010 21:24:00 | 27.0 3/25/2010 18:09:01 | 26.137 |
| 3/24/2010 20:31:01 | 25.797 4/5/2010 21:59:00 | 27.0 3/25/2010 18:29:01 | 26.137 |
| 3/24/2010 20:51:01 | 25.797 4/5/2010 22:34:00 | 27.0 3/25/2010 18:49:01 | 26.199 |
| 3/24/2010 21:11:01 | 25.797 4/5/2010 23:09:00 | 27.0 3/25/2010 19:09:01 | 26.199 |
| 3/24/2010 21:31:01 | 25.797 4/5/2010 23:44:00 | 26.5 3/25/2010 19:29:01 | 26.199 |
| 3/24/2010 21:51:01 | 25.797 4/6/2010 00:19:00 | 26.5 3/25/2010 19:49:01 | 26.199 |
| 3/24/2010 22:11:01 | 25.797 4/6/2010 00:54:00 | 26.5 3/25/2010 20:09:01 | 26.199 |
| 3/24/2010 22:31:01 | 25.797 4/6/2010 01:29:00 | 26.5 3/25/2010 20:29:01 | 26.199 |
| 3/24/2010 22:51:01 | 25.797 4/6/2010 02:04:00 | 26.5 3/25/2010 20:49:01 | 26.262 |
| 3/24/2010 23:11:01 | 25.797 4/6/2010 02:39:00 | 26.5 3/25/2010 21:09:01 | 26.262 |
| 3/24/2010 23:31:01 | 25.797 4/6/2010 03:14:00 | 26.5 3/25/2010 21:29:01 | 26.262 |
| 3/24/2010 23:51:01 | 25.797 4/6/2010 03:49:00 | 26.5 3/25/2010 21:49:01 | 26.262 |
| 3/25/2010 00:11:01 | 25.797 4/6/2010 04:24:00 | 26.0 3/25/2010 22:09:01 | 26.262 |
| 3/25/2010 00:31:01 | 25.797 4/6/2010 04:59:00 | 26.0 3/25/2010 22:29:01 | 26.262 |
| 3/25/2010 00:51:01 | 25.797 4/6/2010 05:34:00 | 26.0 3/25/2010 22:49:01 | 26.262 |
| 3/25/2010 01:11:01 | 25.797 4/6/2010 06:09:00 | 26.0 3/25/2010 23:09:01 | 26.262 |
| 3/25/2010 01:31:01 | 25.859 4/6/2010 06:44:00 | 26.0 3/25/2010 23:29:01 | 26.262 |
| 3/25/2010 01:51:01 | 25.797 4/6/2010 07:19:00 | 26.0 3/25/2010 23:49:01 | 26.262 |
| 3/25/2010 02:11:01 | 25.859 4/6/2010 07:54:00 | 26.0 3/26/2010 00:09:01 | 26.262 |
| 3/25/2010 02:31:01 | 25.859 4/6/2010 08:29:00 | 26.0 3/26/2010 00:29:01 | 26.262 |
| 3/25/2010 02:51:01 | 25.859 4/6/2010 09:04:00 | 26.0 3/26/2010 00:49:01 | 26.262 |
| 3/25/2010 03:11:01 | 25.859 4/6/2010 09:39:00 | 26.0 3/26/2010 01:09:01 | 26.262 |
| 3/25/2010 03:31:01 | 25.859 4/6/2010 10:14:00 | 26.0 3/26/2010 01:29:01 | 26.262 |

|                    |                          |                         |        |
|--------------------|--------------------------|-------------------------|--------|
| 3/25/2010 03:51:01 | 25.859 4/6/2010 10:49:00 | 26.0 3/26/2010 01:49:01 | 26.262 |
| 3/25/2010 04:11:01 | 25.859 4/6/2010 11:24:00 | 26.0 3/26/2010 02:09:01 | 26.262 |
| 3/25/2010 04:31:01 | 25.859 4/6/2010 11:59:00 | 26.0 3/26/2010 02:29:01 | 26.262 |
| 3/25/2010 04:51:01 | 25.859 4/6/2010 12:34:00 | 26.0 3/26/2010 02:49:01 | 26.262 |
| 3/25/2010 05:11:01 | 25.859 4/6/2010 13:09:00 | 26.0 3/26/2010 03:09:01 | 26.262 |
| 3/25/2010 05:31:01 | 25.859 4/6/2010 13:44:00 | 26.0 3/26/2010 03:29:01 | 26.262 |
| 3/25/2010 05:51:01 | 25.859 4/6/2010 14:19:00 | 26.0 3/26/2010 03:49:01 | 26.262 |
| 3/25/2010 06:11:01 | 25.859 4/6/2010 14:54:00 | 26.0 3/26/2010 04:09:01 | 26.262 |
| 3/25/2010 06:31:01 | 25.859 4/6/2010 15:29:00 | 26.0 3/26/2010 04:29:01 | 26.262 |
| 3/25/2010 06:51:01 | 25.859 4/6/2010 16:04:00 | 26.0 3/26/2010 04:49:01 | 26.262 |
| 3/25/2010 07:11:01 | 25.797 4/6/2010 16:39:00 | 26.0 3/26/2010 05:09:01 | 26.262 |
| 3/25/2010 07:31:01 | 25.859 4/6/2010 17:14:00 | 26.5 3/26/2010 05:29:01 | 26.262 |
| 3/25/2010 07:51:01 | 25.797 4/6/2010 17:49:00 | 26.5 3/26/2010 05:49:01 | 26.199 |
| 3/25/2010 08:11:01 | 25.859 4/6/2010 18:24:00 | 26.5 3/26/2010 06:09:01 | 26.199 |
| 3/25/2010 08:31:01 | 25.797 4/6/2010 18:59:00 | 26.5 3/26/2010 06:29:01 | 26.199 |
| 3/25/2010 08:51:01 | 25.797 4/6/2010 19:34:00 | 26.5 3/26/2010 06:49:01 | 26.199 |
| 3/25/2010 09:11:01 | 25.797 4/6/2010 20:09:00 | 26.5 3/26/2010 07:09:01 | 26.199 |
| 3/25/2010 09:31:01 | 25.797 4/6/2010 20:44:00 | 26.5 3/26/2010 07:29:01 | 26.199 |
| 3/25/2010 09:51:01 | 25.797 4/6/2010 21:19:00 | 26.5 3/26/2010 07:49:01 | 26.199 |
| 3/25/2010 10:11:01 | 25.797 4/6/2010 21:54:00 | 26.5 3/26/2010 08:09:01 | 26.199 |
| 3/25/2010 10:31:01 | 25.797 4/6/2010 22:29:00 | 26.5 3/26/2010 08:29:01 | 26.199 |
| 3/25/2010 10:51:01 | 25.797 4/6/2010 23:04:00 | 26.5 3/26/2010 08:49:01 | 26.137 |
| 3/25/2010 11:11:01 | 25.797 4/6/2010 23:39:00 | 26.5 3/26/2010 09:09:01 | 26.137 |
| 3/25/2010 11:31:01 | 25.797 4/7/2010 00:14:00 | 26.5 3/26/2010 09:29:01 | 26.137 |
| 3/25/2010 11:51:01 | 25.797 4/7/2010 00:49:00 | 26.5 3/26/2010 09:49:01 | 26.137 |
| 3/25/2010 12:11:01 | 25.797 4/7/2010 01:24:00 | 26.5 3/26/2010 10:09:01 | 26.137 |
| 3/25/2010 12:31:01 | 25.797 4/7/2010 01:59:00 | 26.5 3/26/2010 10:29:01 | 26.137 |
| 3/25/2010 12:51:01 | 25.797 4/7/2010 02:34:00 | 26.5 3/26/2010 10:49:01 | 26.074 |
| 3/25/2010 13:11:01 | 25.797 4/7/2010 03:09:00 | 26.5 3/26/2010 11:09:01 | 26.074 |
| 3/25/2010 13:31:01 | 25.797 4/7/2010 03:44:00 | 26.5 3/26/2010 11:29:01 | 26.074 |
| 3/25/2010 13:51:01 | 25.797 4/7/2010 04:19:00 | 26.5 3/26/2010 11:49:01 | 26.074 |
| 3/25/2010 14:11:01 | 25.797 4/7/2010 04:54:00 | 26.5 3/26/2010 12:09:01 | 26.074 |
| 3/25/2010 14:31:01 | 25.797 4/7/2010 05:29:00 | 26.5 3/26/2010 12:29:01 | 26.074 |
| 3/25/2010 14:51:01 | 25.797 4/7/2010 06:04:00 | 26.5 3/26/2010 12:49:01 | 26.074 |
| 3/25/2010 15:11:01 | 25.797 4/7/2010 06:39:00 | 26.5 3/26/2010 13:09:01 | 26.074 |
| 3/25/2010 15:31:01 | 25.797 4/7/2010 07:14:00 | 26.5 3/26/2010 13:29:01 | 26.074 |
| 3/25/2010 15:51:01 | 25.797 4/7/2010 07:49:00 | 26.0 3/26/2010 13:49:01 | 26.074 |
| 3/25/2010 16:11:01 | 25.797 4/7/2010 08:24:00 | 26.0 3/26/2010 14:09:01 | 26.074 |
| 3/25/2010 16:31:01 | 25.797 4/7/2010 08:59:00 | 26.0 3/26/2010 14:29:01 | 26.012 |
| 3/25/2010 16:51:01 | 25.797 4/7/2010 09:34:00 | 26.0 3/26/2010 14:49:01 | 26.074 |
| 3/25/2010 17:11:01 | 25.797 4/7/2010 10:09:00 | 26.0 3/26/2010 15:09:01 | 26.012 |
| 3/25/2010 17:31:01 | 25.797 4/7/2010 10:44:00 | 26.0 3/26/2010 15:29:01 | 26.012 |
| 3/25/2010 17:51:01 | 25.797 4/7/2010 11:19:00 | 26.0 3/26/2010 15:49:01 | 26.012 |
| 3/25/2010 18:11:01 | 25.797 4/7/2010 11:54:00 | 26.0 3/26/2010 16:09:01 | 26.012 |
| 3/25/2010 18:31:01 | 25.797 4/7/2010 12:29:00 | 26.0 3/26/2010 16:29:01 | 26.012 |
| 3/25/2010 18:51:01 | 25.797 4/7/2010 13:04:00 | 26.0 3/26/2010 16:49:01 | 26.074 |
| 3/25/2010 19:11:01 | 25.797 4/7/2010 13:39:00 | 26.5 3/26/2010 17:09:01 | 26.074 |
| 3/25/2010 19:31:01 | 25.797 4/7/2010 14:14:00 | 26.5 3/26/2010 17:29:01 | 26.074 |
| 3/25/2010 19:51:01 | 25.797 4/7/2010 14:49:00 | 26.5 3/26/2010 17:49:01 | 26.074 |
| 3/25/2010 20:11:01 | 25.797 4/7/2010 15:24:00 | 26.5 3/26/2010 18:09:01 | 26.074 |

|                    |        |                   |      |                    |        |
|--------------------|--------|-------------------|------|--------------------|--------|
| 3/25/2010 20:31:01 | 25.797 | 4/7/2010 15:59:00 | 26.5 | 3/26/2010 18:29:01 | 26.074 |
| 3/25/2010 20:51:01 | 25.797 | 4/7/2010 16:34:00 | 26.5 | 3/26/2010 18:49:01 | 26.074 |
| 3/25/2010 21:11:01 | 25.797 | 4/7/2010 17:09:00 | 26.5 | 3/26/2010 19:09:01 | 26.074 |
| 3/25/2010 21:31:01 | 25.859 | 4/7/2010 17:44:00 | 26.5 | 3/26/2010 19:29:01 | 26.074 |
| 3/25/2010 21:51:01 | 25.859 | 4/7/2010 18:19:00 | 26.5 | 3/26/2010 19:49:01 | 26.137 |
| 3/25/2010 22:11:01 | 25.859 | 4/7/2010 18:54:00 | 26.5 | 3/26/2010 20:09:01 | 26.137 |
| 3/25/2010 22:31:01 | 25.859 | 4/7/2010 19:29:00 | 26.5 | 3/26/2010 20:29:01 | 26.137 |
| 3/25/2010 22:51:01 | 25.859 | 4/7/2010 20:04:00 | 26.5 | 3/26/2010 20:49:01 | 26.137 |
| 3/25/2010 23:11:01 | 25.859 | 4/7/2010 20:39:00 | 26.5 | 3/26/2010 21:09:01 | 26.137 |
| 3/25/2010 23:31:01 | 25.859 | 4/7/2010 21:14:00 | 26.5 | 3/26/2010 21:29:01 | 26.199 |
| 3/25/2010 23:51:01 | 25.859 | 4/7/2010 21:49:00 | 26.5 | 3/26/2010 21:49:01 | 26.199 |
| 3/26/2010 00:11:01 | 25.859 | 4/7/2010 22:24:00 | 26.5 | 3/26/2010 22:09:01 | 26.199 |
| 3/26/2010 00:31:01 | 25.859 | 4/7/2010 22:59:00 | 26.5 | 3/26/2010 22:29:01 | 26.199 |
| 3/26/2010 00:51:01 | 25.859 | 4/7/2010 23:34:00 | 26.5 | 3/26/2010 22:49:01 | 26.199 |
| 3/26/2010 01:11:01 | 25.859 | 4/8/2010 00:09:00 | 26.5 | 3/26/2010 23:09:01 | 26.199 |
| 3/26/2010 01:31:01 | 25.859 | 4/8/2010 00:44:00 | 26.5 | 3/26/2010 23:29:01 | 26.199 |
| 3/26/2010 01:51:01 | 25.859 | 4/8/2010 01:19:00 | 26.5 | 3/26/2010 23:49:01 | 26.199 |
| 3/26/2010 02:11:01 | 25.859 | 4/8/2010 01:54:00 | 26.5 | 3/27/2010 00:09:01 | 26.262 |
| 3/26/2010 02:31:01 | 25.859 | 4/8/2010 02:29:00 | 26.5 | 3/27/2010 00:29:01 | 26.262 |
| 3/26/2010 02:51:01 | 25.859 | 4/8/2010 03:04:00 | 26.5 | 3/27/2010 00:49:01 | 26.262 |
| 3/26/2010 03:11:01 | 25.859 | 4/8/2010 03:39:00 | 26.5 | 3/27/2010 01:09:01 | 26.262 |
| 3/26/2010 03:31:01 | 25.859 | 4/8/2010 04:14:00 | 26.5 | 3/27/2010 01:29:01 | 26.262 |
| 3/26/2010 03:51:01 | 25.859 | 4/8/2010 04:49:00 | 26.5 | 3/27/2010 01:49:01 | 26.262 |
| 3/26/2010 04:11:01 | 25.859 | 4/8/2010 05:24:00 | 26.5 | 3/27/2010 02:09:01 | 26.262 |
| 3/26/2010 04:31:01 | 25.859 | 4/8/2010 05:59:00 | 26.5 | 3/27/2010 02:29:01 | 26.262 |
| 3/26/2010 04:51:01 | 25.859 | 4/8/2010 06:34:00 | 26.5 | 3/27/2010 02:49:01 | 26.262 |
| 3/26/2010 05:11:01 | 25.859 | 4/8/2010 07:09:00 | 26.5 | 3/27/2010 03:09:01 | 26.262 |
| 3/26/2010 05:31:01 | 25.859 | 4/8/2010 07:44:00 | 26.5 | 3/27/2010 03:29:01 | 26.262 |
| 3/26/2010 05:51:01 | 25.859 | 4/8/2010 08:19:00 | 26.5 | 3/27/2010 03:49:01 | 26.262 |
| 3/26/2010 06:11:01 | 25.859 | 4/8/2010 08:54:00 | 26.5 | 3/27/2010 04:09:01 | 26.262 |
| 3/26/2010 06:31:01 | 25.859 | 4/8/2010 09:29:00 | 26.5 | 3/27/2010 04:29:01 | 26.262 |
| 3/26/2010 06:51:01 | 25.859 | 4/8/2010 10:04:00 | 26.5 | 3/27/2010 04:49:01 | 26.262 |
| 3/26/2010 07:11:01 | 25.859 | 4/8/2010 10:39:00 | 26.5 | 3/27/2010 05:09:01 | 26.262 |
| 3/26/2010 07:31:01 | 25.859 | 4/8/2010 11:14:00 | 26.5 | 3/27/2010 05:29:01 | 26.262 |
| 3/26/2010 07:51:01 | 25.859 | 4/8/2010 11:49:00 | 26.5 | 3/27/2010 05:49:01 | 26.262 |
| 3/26/2010 08:11:01 | 25.859 | 4/8/2010 12:24:00 | 26.5 | 3/27/2010 06:09:01 | 26.262 |
| 3/26/2010 08:31:01 | 25.859 | 4/8/2010 12:59:00 | 26.5 | 3/27/2010 06:29:01 | 26.262 |
| 3/26/2010 08:51:01 | 25.859 | 4/8/2010 13:34:00 | 26.5 | 3/27/2010 06:49:01 | 26.262 |
| 3/26/2010 09:11:01 | 25.859 | 4/8/2010 14:09:00 | 26.5 | 3/27/2010 07:09:01 | 26.262 |
| 3/26/2010 09:31:01 | 25.859 | 4/8/2010 14:44:00 | 26.5 | 3/27/2010 07:29:01 | 26.262 |
| 3/26/2010 09:51:01 | 25.859 | 4/8/2010 15:19:00 | 26.5 | 3/27/2010 07:49:01 | 26.262 |
| 3/26/2010 10:11:01 | 25.859 | 4/8/2010 15:54:00 | 26.5 | 3/27/2010 08:09:01 | 26.262 |
| 3/26/2010 10:31:01 | 25.797 | 4/8/2010 16:29:00 | 26.5 | 3/27/2010 08:29:01 | 26.262 |
| 3/26/2010 10:51:01 | 25.797 | 4/8/2010 17:04:00 | 26.5 | 3/27/2010 08:49:01 | 26.262 |
| 3/26/2010 11:11:01 | 25.797 | 4/8/2010 17:39:00 | 26.5 | 3/27/2010 09:09:01 | 26.199 |
| 3/26/2010 11:31:01 | 25.797 | 4/8/2010 18:14:00 | 26.5 | 3/27/2010 09:29:01 | 26.199 |
| 3/26/2010 11:51:01 | 25.797 | 4/8/2010 18:49:00 | 26.5 | 3/27/2010 09:49:01 | 26.199 |
| 3/26/2010 12:11:01 | 25.797 | 4/8/2010 19:24:00 | 27.0 | 3/27/2010 10:09:01 | 26.199 |
| 3/26/2010 12:31:01 | 25.797 | 4/8/2010 19:59:00 | 27.0 | 3/27/2010 10:29:01 | 26.199 |
| 3/26/2010 12:51:01 | 25.797 | 4/8/2010 20:34:00 | 27.0 | 3/27/2010 10:49:01 | 26.199 |

|                    |                           |                         |        |
|--------------------|---------------------------|-------------------------|--------|
| 3/26/2010 13:11:01 | 25.797 4/8/2010 21:09:00  | 27.0 3/27/2010 11:09:01 | 26.199 |
| 3/26/2010 13:31:01 | 25.797 4/8/2010 21:44:00  | 27.0 3/27/2010 11:29:01 | 26.199 |
| 3/26/2010 13:51:01 | 25.797 4/8/2010 22:19:00  | 27.0 3/27/2010 11:49:01 | 26.199 |
| 3/26/2010 14:11:01 | 25.797 4/8/2010 22:54:00  | 27.0 3/27/2010 12:09:01 | 26.137 |
| 3/26/2010 14:31:01 | 25.797 4/8/2010 23:29:00  | 27.0 3/27/2010 12:29:01 | 26.137 |
| 3/26/2010 14:51:01 | 25.797 4/9/2010 00:04:00  | 27.0 3/27/2010 12:49:01 | 26.137 |
| 3/26/2010 15:11:01 | 25.797 4/9/2010 00:39:00  | 27.0 3/27/2010 13:09:01 | 26.137 |
| 3/26/2010 15:31:01 | 25.797 4/9/2010 01:14:00  | 26.5 3/27/2010 13:29:01 | 26.137 |
| 3/26/2010 15:51:01 | 25.734 4/9/2010 01:49:00  | 26.5 3/27/2010 13:49:01 | 26.137 |
| 3/26/2010 16:11:01 | 25.734 4/9/2010 02:24:00  | 26.5 3/27/2010 14:09:01 | 26.137 |
| 3/26/2010 16:31:01 | 25.734 4/9/2010 02:59:00  | 26.5 3/27/2010 14:29:01 | 26.137 |
| 3/26/2010 16:51:01 | 25.734 4/9/2010 03:34:00  | 26.5 3/27/2010 14:49:01 | 26.137 |
| 3/26/2010 17:11:01 | 25.734 4/9/2010 04:09:00  | 26.5 3/27/2010 15:09:01 | 26.137 |
| 3/26/2010 17:31:01 | 25.797 4/9/2010 04:44:00  | 26.5 3/27/2010 15:29:01 | 26.137 |
| 3/26/2010 17:51:01 | 25.734 4/9/2010 05:19:00  | 26.5 3/27/2010 15:49:01 | 26.137 |
| 3/26/2010 18:11:01 | 25.797 4/9/2010 05:54:00  | 26.5 3/27/2010 16:09:01 | 26.137 |
| 3/26/2010 18:31:01 | 25.797 4/9/2010 06:29:00  | 26.5 3/27/2010 16:29:01 | 26.137 |
| 3/26/2010 18:51:01 | 25.797 4/9/2010 07:04:00  | 26.5 3/27/2010 16:49:01 | 26.137 |
| 3/26/2010 19:11:01 | 25.797 4/9/2010 07:39:00  | 26.5 3/27/2010 17:09:01 | 26.137 |
| 3/26/2010 19:31:01 | 25.797 4/9/2010 08:14:00  | 26.5 3/27/2010 17:29:01 | 26.137 |
| 3/26/2010 19:51:01 | 25.797 4/9/2010 08:49:00  | 26.5 3/27/2010 17:49:01 | 26.137 |
| 3/26/2010 20:11:01 | 25.797 4/9/2010 09:24:00  | 26.5 3/27/2010 18:09:01 | 26.199 |
| 3/26/2010 20:31:01 | 25.797 4/9/2010 09:59:00  | 26.5 3/27/2010 18:29:01 | 26.199 |
| 3/26/2010 20:51:01 | 25.797 4/9/2010 10:34:00  | 26.5 3/27/2010 18:49:01 | 26.199 |
| 3/26/2010 21:11:01 | 25.797 4/9/2010 11:09:00  | 26.0 3/27/2010 19:09:01 | 26.199 |
| 3/26/2010 21:31:01 | 25.797 4/9/2010 11:44:00  | 26.5 3/27/2010 19:29:01 | 26.199 |
| 3/26/2010 21:51:01 | 25.797 4/9/2010 12:19:00  | 26.5 3/27/2010 19:49:01 | 26.199 |
| 3/26/2010 22:11:01 | 25.797 4/9/2010 12:54:00  | 26.5 3/27/2010 20:09:01 | 26.199 |
| 3/26/2010 22:31:01 | 25.797 4/9/2010 13:29:00  | 26.5 3/27/2010 20:29:01 | 26.199 |
| 3/26/2010 22:51:01 | 25.797 4/9/2010 14:04:00  | 26.5 3/27/2010 20:49:01 | 26.262 |
| 3/26/2010 23:11:01 | 25.797 4/9/2010 14:39:00  | 26.5 3/27/2010 21:09:01 | 26.262 |
| 3/26/2010 23:31:01 | 25.859 4/9/2010 15:14:00  | 26.5 3/27/2010 21:29:01 | 26.262 |
| 3/26/2010 23:51:01 | 25.859 4/9/2010 15:49:00  | 26.5 3/27/2010 21:49:01 | 26.262 |
| 3/27/2010 00:11:01 | 25.859 4/9/2010 16:24:00  | 26.5 3/27/2010 22:09:01 | 26.262 |
| 3/27/2010 00:31:01 | 25.859 4/9/2010 16:59:00  | 26.5 3/27/2010 22:29:01 | 26.262 |
| 3/27/2010 00:51:01 | 25.859 4/9/2010 17:34:00  | 26.5 3/27/2010 22:49:01 | 26.262 |
| 3/27/2010 01:11:01 | 25.859 4/9/2010 18:09:00  | 26.5 3/27/2010 23:09:01 | 26.324 |
| 3/27/2010 01:31:01 | 25.859 4/9/2010 18:44:00  | 26.5 3/27/2010 23:29:01 | 26.324 |
| 3/27/2010 01:51:01 | 25.859 4/9/2010 19:19:00  | 26.5 3/27/2010 23:49:01 | 26.324 |
| 3/27/2010 02:11:01 | 25.859 4/9/2010 19:54:00  | 26.5 3/28/2010 00:09:01 | 26.324 |
| 3/27/2010 02:31:01 | 25.859 4/9/2010 20:29:00  | 26.5 3/28/2010 00:29:01 | 26.324 |
| 3/27/2010 02:51:01 | 25.859 4/9/2010 21:04:00  | 26.5 3/28/2010 00:49:01 | 26.324 |
| 3/27/2010 03:11:01 | 25.859 4/9/2010 21:39:00  | 26.5 3/28/2010 01:09:01 | 26.324 |
| 3/27/2010 03:31:01 | 25.859 4/9/2010 22:14:00  | 26.5 3/28/2010 01:29:01 | 26.324 |
| 3/27/2010 03:51:01 | 25.859 4/9/2010 22:49:00  | 26.5 3/28/2010 01:49:01 | 26.324 |
| 3/27/2010 04:11:01 | 25.859 4/9/2010 23:24:00  | 27.0 3/28/2010 02:09:01 | 26.324 |
| 3/27/2010 04:31:01 | 25.859 4/9/2010 23:59:00  | 26.5 3/28/2010 02:29:01 | 26.324 |
| 3/27/2010 04:51:01 | 25.859 4/10/2010 00:34:00 | 26.5 3/28/2010 02:49:01 | 26.324 |
| 3/27/2010 05:11:01 | 25.859 4/10/2010 01:09:00 | 26.5 3/28/2010 03:09:01 | 26.387 |
| 3/27/2010 05:31:01 | 25.859 4/10/2010 01:44:00 | 26.5 3/28/2010 03:29:01 | 26.387 |

|                    |        |                    |      |                    |        |
|--------------------|--------|--------------------|------|--------------------|--------|
| 3/27/2010 05:51:01 | 25.859 | 4/10/2010 02:19:00 | 26.5 | 3/28/2010 03:49:01 | 26.324 |
| 3/27/2010 06:11:01 | 25.859 | 4/10/2010 02:54:00 | 26.5 | 3/28/2010 04:09:01 | 26.387 |
| 3/27/2010 06:31:01 | 25.859 | 4/10/2010 03:29:00 | 26.5 | 3/28/2010 04:29:01 | 26.387 |
| 3/27/2010 06:51:01 | 25.859 | 4/10/2010 04:04:00 | 26.5 | 3/28/2010 04:49:01 | 26.387 |
| 3/27/2010 07:11:01 | 25.859 | 4/10/2010 04:39:00 | 26.5 | 3/28/2010 05:09:01 | 26.387 |
| 3/27/2010 07:31:01 | 25.859 | 4/10/2010 05:14:00 | 26.5 | 3/28/2010 05:29:01 | 26.324 |
| 3/27/2010 07:51:01 | 25.859 | 4/10/2010 05:49:00 | 26.5 | 3/28/2010 05:49:01 | 26.324 |
| 3/27/2010 08:11:01 | 25.859 | 4/10/2010 06:24:00 | 26.0 | 3/28/2010 06:09:01 | 26.324 |
| 3/27/2010 08:31:01 | 25.859 | 4/10/2010 06:59:00 | 26.0 | 3/28/2010 06:29:01 | 26.324 |
| 3/27/2010 08:51:01 | 25.859 | 4/10/2010 07:34:00 | 26.0 | 3/28/2010 06:49:01 | 26.324 |
| 3/27/2010 09:11:01 | 25.859 | 4/10/2010 08:09:00 | 26.0 | 3/28/2010 07:09:01 | 26.324 |
| 3/27/2010 09:31:01 | 25.859 | 4/10/2010 08:44:00 | 26.0 | 3/28/2010 07:29:01 | 26.324 |
| 3/27/2010 09:51:01 | 25.859 | 4/10/2010 09:19:00 | 26.0 | 3/28/2010 07:49:01 | 26.324 |
| 3/27/2010 10:11:01 | 25.859 | 4/10/2010 09:54:00 | 26.0 | 3/28/2010 08:09:01 | 26.324 |
| 3/27/2010 10:31:01 | 25.859 | 4/10/2010 10:29:00 | 26.0 | 3/28/2010 08:29:01 | 26.324 |
| 3/27/2010 10:51:01 | 25.859 | 4/10/2010 11:04:00 | 26.0 | 3/28/2010 08:49:01 | 26.324 |
| 3/27/2010 11:11:01 | 25.859 | 4/10/2010 11:39:00 | 26.0 | 3/28/2010 09:09:01 | 26.324 |
| 3/27/2010 11:31:01 | 25.859 | 4/10/2010 12:14:00 | 26.0 | 3/28/2010 09:29:01 | 26.324 |
| 3/27/2010 11:51:01 | 25.797 | 4/10/2010 12:49:00 | 26.0 | 3/28/2010 09:49:01 | 26.324 |
| 3/27/2010 12:11:01 | 25.797 | 4/10/2010 13:24:00 | 26.0 | 3/28/2010 10:09:01 | 26.324 |
| 3/27/2010 12:31:01 | 25.797 | 4/10/2010 13:59:00 | 26.5 | 3/28/2010 10:29:01 | 26.324 |
| 3/27/2010 12:51:01 | 25.797 | 4/10/2010 14:34:00 | 26.5 | 3/28/2010 10:49:01 | 26.262 |
| 3/27/2010 13:11:01 | 25.797 | 4/10/2010 15:09:00 | 26.5 | 3/28/2010 11:09:01 | 26.262 |
| 3/27/2010 13:31:01 | 25.797 | 4/10/2010 15:44:00 | 26.5 | 3/28/2010 11:29:01 | 26.262 |
| 3/27/2010 13:51:01 | 25.797 | 4/10/2010 16:19:00 | 26.5 | 3/28/2010 11:49:01 | 26.262 |
| 3/27/2010 14:11:01 | 25.797 | 4/10/2010 16:54:00 | 26.5 | 3/28/2010 12:09:01 | 26.262 |
| 3/27/2010 14:31:01 | 25.797 | 4/10/2010 17:29:00 | 26.5 | 3/28/2010 12:29:01 | 26.262 |
| 3/27/2010 14:51:01 | 25.797 | 4/10/2010 18:04:00 | 26.5 | 3/28/2010 12:49:01 | 26.262 |
| 3/27/2010 15:11:01 | 25.797 | 4/10/2010 18:39:00 | 26.5 | 3/28/2010 13:09:01 | 26.262 |
| 3/27/2010 15:31:01 | 25.797 | 4/10/2010 19:14:00 | 26.5 | 3/28/2010 13:29:01 | 26.262 |
| 3/27/2010 15:51:01 | 25.797 | 4/10/2010 19:49:00 | 26.5 | 3/28/2010 13:49:01 | 26.262 |
| 3/27/2010 16:11:01 | 25.797 | 4/10/2010 20:24:00 | 26.5 | 3/28/2010 14:09:01 | 26.262 |
| 3/27/2010 16:31:01 | 25.797 | 4/10/2010 20:59:00 | 26.5 | 3/28/2010 14:29:01 | 26.262 |
| 3/27/2010 16:51:01 | 25.797 | 4/10/2010 21:34:00 | 26.5 | 3/28/2010 14:49:01 | 26.262 |
| 3/27/2010 17:11:01 | 25.797 | 4/10/2010 22:09:00 | 26.5 | 3/28/2010 15:09:01 | 26.262 |
| 3/27/2010 17:31:01 | 25.797 | 4/10/2010 22:44:00 | 26.5 | 3/28/2010 15:29:01 | 26.262 |
| 3/27/2010 17:51:01 | 25.797 | 4/10/2010 23:19:00 | 26.5 | 3/28/2010 15:49:01 | 26.262 |
| 3/27/2010 18:11:01 | 25.797 | 4/10/2010 23:54:00 | 26.5 | 3/28/2010 16:09:01 | 26.262 |
| 3/27/2010 18:31:01 | 25.797 | 4/11/2010 00:29:00 | 26.5 | 3/28/2010 16:29:01 | 26.262 |
| 3/27/2010 18:51:01 | 25.797 | 4/11/2010 01:04:00 | 26.5 | 3/28/2010 16:49:01 | 26.262 |
| 3/27/2010 19:11:01 | 25.797 | 4/11/2010 01:39:00 | 26.5 | 3/28/2010 17:09:01 | 26.262 |
| 3/27/2010 19:31:01 | 25.797 | 4/11/2010 02:14:00 | 26.5 | 3/28/2010 17:29:01 | 26.262 |
| 3/27/2010 19:51:01 | 25.797 | 4/11/2010 02:49:00 | 26.0 | 3/28/2010 17:49:01 | 26.262 |
| 3/27/2010 20:11:01 | 25.797 | 4/11/2010 03:24:00 | 26.0 | 3/28/2010 18:09:01 | 26.262 |
| 3/27/2010 20:31:01 | 25.797 | 4/11/2010 03:59:00 | 26.0 | 3/28/2010 18:29:01 | 26.262 |
| 3/27/2010 20:51:01 | 25.797 | 4/11/2010 04:34:00 | 26.0 | 3/28/2010 18:49:01 | 26.262 |
| 3/27/2010 21:11:01 | 25.797 | 4/11/2010 05:09:00 | 26.0 | 3/28/2010 19:09:01 | 26.262 |
| 3/27/2010 21:31:01 | 25.797 | 4/11/2010 05:44:00 | 26.0 | 3/28/2010 19:29:01 | 26.324 |
| 3/27/2010 21:51:01 | 25.797 | 4/11/2010 06:19:00 | 26.0 | 3/28/2010 19:49:01 | 26.324 |
| 3/27/2010 22:11:01 | 25.797 | 4/11/2010 06:54:00 | 26.0 | 3/28/2010 20:09:01 | 26.324 |



|                    |        |                    |      |                    |        |
|--------------------|--------|--------------------|------|--------------------|--------|
| 3/27/2010 22:31:01 | 25.797 | 4/11/2010 07:29:00 | 26.0 | 3/28/2010 20:29:01 | 26.324 |
| 3/27/2010 22:51:01 | 25.859 | 4/11/2010 08:04:00 | 26.0 | 3/28/2010 20:49:01 | 26.324 |
| 3/27/2010 23:11:01 | 25.859 | 4/11/2010 08:39:00 | 26.0 | 3/28/2010 21:09:01 | 26.324 |
| 3/27/2010 23:31:01 | 25.859 | 4/11/2010 09:14:00 | 26.0 | 3/28/2010 21:29:01 | 26.324 |
| 3/27/2010 23:51:01 | 25.859 | 4/11/2010 09:49:00 | 26.0 | 3/28/2010 21:49:01 | 26.387 |
| 3/28/2010 00:11:01 | 25.859 | 4/11/2010 10:24:00 | 25.5 | 3/28/2010 22:09:01 | 26.387 |
| 3/28/2010 00:31:01 | 25.859 | 4/11/2010 10:59:00 | 26.0 | 3/28/2010 22:29:01 | 26.387 |
| 3/28/2010 00:51:01 | 25.859 | 4/11/2010 11:34:00 | 26.0 | 3/28/2010 22:49:01 | 26.387 |
| 3/28/2010 01:11:01 | 25.859 | 4/11/2010 12:09:00 | 26.0 | 3/28/2010 23:09:01 | 26.387 |
| 3/28/2010 01:31:01 | 25.859 | 4/11/2010 12:44:00 | 26.0 | 3/28/2010 23:29:01 | 26.387 |
| 3/28/2010 01:51:01 | 25.859 | 4/11/2010 13:19:00 | 26.0 | 3/28/2010 23:49:01 | 26.387 |
| 3/28/2010 02:11:01 | 25.859 | 4/11/2010 13:54:00 | 26.0 | 3/29/2010 00:09:01 | 26.387 |
| 3/28/2010 02:31:01 | 25.859 | 4/11/2010 14:29:00 | 26.0 | 3/29/2010 00:29:01 | 26.449 |
| 3/28/2010 02:51:01 | 25.859 | 4/11/2010 15:04:00 | 26.0 | 3/29/2010 00:49:01 | 26.449 |
| 3/28/2010 03:11:01 | 25.859 | 4/11/2010 15:39:00 | 26.0 | 3/29/2010 01:09:01 | 26.449 |
| 3/28/2010 03:31:01 | 25.859 | 4/11/2010 16:14:00 | 26.0 | 3/29/2010 01:29:01 | 26.449 |
| 3/28/2010 03:51:01 | 25.859 | 4/11/2010 16:49:00 | 26.0 | 3/29/2010 01:49:01 | 26.449 |
| 3/28/2010 04:11:01 | 25.859 | 4/11/2010 17:24:00 | 26.0 | 3/29/2010 02:09:01 | 26.449 |
| 3/28/2010 04:31:01 | 25.859 | 4/11/2010 17:59:00 | 26.5 | 3/29/2010 02:29:01 | 26.449 |
| 3/28/2010 04:51:01 | 25.859 | 4/11/2010 18:34:00 | 26.5 | 3/29/2010 02:49:01 | 26.449 |
| 3/28/2010 05:11:01 | 25.859 | 4/11/2010 19:09:00 | 26.5 | 3/29/2010 03:09:01 | 26.449 |
| 3/28/2010 05:31:01 | 25.859 | 4/11/2010 19:44:00 | 26.5 | 3/29/2010 03:29:01 | 26.449 |
| 3/28/2010 05:51:01 | 25.859 | 4/11/2010 20:19:00 | 26.5 | 3/29/2010 03:49:01 | 26.449 |
| 3/28/2010 06:11:01 | 25.859 | 4/11/2010 20:54:00 | 26.5 | 3/29/2010 04:09:01 | 26.449 |
| 3/28/2010 06:31:01 | 25.859 | 4/11/2010 21:29:00 | 26.5 | 3/29/2010 04:29:01 | 26.449 |
| 3/28/2010 06:51:01 | 25.859 | 4/11/2010 22:04:00 | 26.5 | 3/29/2010 04:49:01 | 26.449 |
| 3/28/2010 07:11:01 | 25.859 | 4/11/2010 22:39:00 | 26.5 | 3/29/2010 05:09:01 | 26.449 |
| 3/28/2010 07:31:01 | 25.859 | 4/11/2010 23:14:00 | 26.5 | 3/29/2010 05:29:01 | 26.449 |
| 3/28/2010 07:51:01 | 25.859 | 4/11/2010 23:49:00 | 26.5 | 3/29/2010 05:49:01 | 26.449 |
| 3/28/2010 08:11:01 | 25.859 | 4/12/2010 00:24:00 | 26.5 | 3/29/2010 06:09:01 | 26.449 |
| 3/28/2010 08:31:01 | 25.859 | 4/12/2010 00:59:00 | 26.5 | 3/29/2010 06:29:01 | 26.449 |
| 3/28/2010 08:51:01 | 25.859 | 4/12/2010 01:34:00 | 26.5 | 3/29/2010 06:49:01 | 26.449 |
| 3/28/2010 09:11:01 | 25.859 | 4/12/2010 02:09:00 | 26.0 | 3/29/2010 07:09:01 | 26.449 |
| 3/28/2010 09:31:01 | 25.859 | 4/12/2010 02:44:00 | 26.0 | 3/29/2010 07:29:01 | 26.449 |
| 3/28/2010 09:51:01 | 25.859 | 4/12/2010 03:19:00 | 26.0 | 3/29/2010 07:49:01 | 26.449 |
| 3/28/2010 10:11:01 | 25.859 | 4/12/2010 03:54:00 | 26.0 | 3/29/2010 08:09:01 | 26.449 |
| 3/28/2010 10:31:01 | 25.859 | 4/12/2010 04:29:00 | 26.0 | 3/29/2010 08:29:01 | 26.449 |
| 3/28/2010 10:51:01 | 25.859 | 4/12/2010 05:04:00 | 26.0 | 3/29/2010 08:49:01 | 26.449 |
| 3/28/2010 11:11:01 | 25.859 | 4/12/2010 05:39:00 | 26.0 | 3/29/2010 09:09:01 | 26.449 |
| 3/28/2010 11:31:01 | 25.859 | 4/12/2010 06:14:00 | 26.0 | 3/29/2010 09:29:01 | 26.449 |
| 3/28/2010 11:51:01 | 25.859 | 4/12/2010 06:49:00 | 26.0 | 3/29/2010 09:49:01 | 26.449 |
| 3/28/2010 12:11:01 | 25.859 | 4/12/2010 07:24:00 | 25.5 | 3/29/2010 10:09:01 | 26.387 |
| 3/28/2010 12:31:01 | 25.859 | 4/12/2010 07:59:00 | 25.5 | 3/29/2010 10:29:01 | 26.387 |
| 3/28/2010 12:51:01 | 25.797 | 4/12/2010 08:34:00 | 25.5 | 3/29/2010 10:49:01 | 26.387 |
| 3/28/2010 13:11:01 | 25.797 | 4/12/2010 09:09:00 | 25.5 | 3/29/2010 11:09:01 | 26.387 |
| 3/28/2010 13:31:01 | 25.797 | 4/12/2010 09:44:00 | 25.5 | 3/29/2010 11:29:01 | 26.387 |
| 3/28/2010 13:51:01 | 25.797 | 4/12/2010 10:19:00 | 25.5 | 3/29/2010 11:49:01 | 26.387 |
| 3/28/2010 14:11:01 | 25.797 | 4/12/2010 10:54:00 | 25.5 | 3/29/2010 12:09:01 | 26.387 |
| 3/28/2010 14:31:01 | 25.797 | 4/12/2010 11:29:00 | 25.5 | 3/29/2010 12:29:01 | 26.387 |
| 3/28/2010 14:51:01 | 25.797 | 4/12/2010 12:04:00 | 25.5 | 3/29/2010 12:49:01 | 26.387 |

|                    |        |                    |      |                    |        |
|--------------------|--------|--------------------|------|--------------------|--------|
| 3/28/2010 15:11:01 | 25.797 | 4/12/2010 12:39:00 | 25.5 | 3/29/2010 13:09:01 | 26.387 |
| 3/28/2010 15:31:01 | 25.797 | 4/12/2010 13:14:00 | 26.0 | 3/29/2010 13:29:01 | 26.387 |
| 3/28/2010 15:51:01 | 25.797 | 4/12/2010 13:49:00 | 26.0 | 3/29/2010 13:49:01 | 26.387 |
| 3/28/2010 16:11:01 | 25.797 | 4/12/2010 14:24:00 | 26.0 | 3/29/2010 14:09:01 | 26.387 |
| 3/28/2010 16:31:01 | 25.797 | 4/12/2010 14:59:00 | 26.0 | 3/29/2010 14:29:01 | 26.387 |
| 3/28/2010 16:51:01 | 25.797 | 4/12/2010 15:34:00 | 26.0 | 3/29/2010 14:49:01 | 26.387 |
| 3/28/2010 17:11:01 | 25.797 | 4/12/2010 16:09:00 | 26.0 | 3/29/2010 15:09:01 | 26.387 |
| 3/28/2010 17:31:01 | 25.797 | 4/12/2010 16:44:00 | 26.0 | 3/29/2010 15:29:01 | 26.387 |
| 3/28/2010 17:51:01 | 25.797 | 4/12/2010 17:19:00 | 26.0 | 3/29/2010 15:49:01 | 26.387 |
| 3/28/2010 18:11:01 | 25.797 | 4/12/2010 17:54:00 | 26.0 | 3/29/2010 16:09:01 | 26.387 |
| 3/28/2010 18:31:01 | 25.797 | 4/12/2010 18:29:00 | 26.0 | 3/29/2010 16:29:01 | 26.387 |
| 3/28/2010 18:51:01 | 25.797 | 4/12/2010 19:04:00 | 26.0 | 3/29/2010 16:49:01 | 26.387 |
| 3/28/2010 19:11:01 | 25.797 | 4/12/2010 19:39:00 | 26.0 | 3/29/2010 17:09:01 | 26.387 |
| 3/28/2010 19:31:01 | 25.797 | 4/12/2010 20:14:00 | 26.0 | 3/29/2010 17:29:01 | 26.387 |
| 3/28/2010 19:51:01 | 25.797 | 4/12/2010 20:49:00 | 26.5 | 3/29/2010 17:49:01 | 26.387 |
| 3/28/2010 20:11:01 | 25.797 | 4/12/2010 21:24:00 | 26.5 | 3/29/2010 18:09:01 | 26.387 |
| 3/28/2010 20:31:01 | 25.797 | 4/12/2010 21:59:00 | 26.5 | 3/29/2010 18:29:01 | 26.449 |
| 3/28/2010 20:51:01 | 25.797 | 4/12/2010 22:34:00 | 26.5 | 3/29/2010 18:49:01 | 26.449 |
| 3/28/2010 21:11:01 | 25.797 | 4/12/2010 23:09:00 | 26.5 | 3/29/2010 19:09:01 | 26.449 |
| 3/28/2010 21:31:01 | 25.859 | 4/12/2010 23:44:00 | 26.5 | 3/29/2010 19:29:01 | 26.449 |
| 3/28/2010 21:51:01 | 25.859 | 4/13/2010 00:19:00 | 26.5 | 3/29/2010 19:49:01 | 26.449 |
| 3/28/2010 22:11:01 | 25.859 | 4/13/2010 00:54:00 | 26.5 | 3/29/2010 20:09:01 | 26.449 |
| 3/28/2010 22:31:01 | 25.859 | 4/13/2010 01:29:00 | 26.5 | 3/29/2010 20:29:01 | 26.449 |
| 3/28/2010 22:51:01 | 25.859 | 4/13/2010 02:04:00 | 26.0 | 3/29/2010 20:49:01 | 26.449 |
| 3/28/2010 23:11:01 | 25.859 | 4/13/2010 02:39:00 | 26.0 | 3/29/2010 21:09:01 | 26.512 |
| 3/28/2010 23:31:01 | 25.859 | 4/13/2010 03:14:00 | 26.0 | 3/29/2010 21:29:01 | 26.512 |
| 3/28/2010 23:51:01 | 25.859 | 4/13/2010 03:49:00 | 26.0 | 3/29/2010 21:49:01 | 26.512 |
| 3/29/2010 00:11:01 | 25.859 | 4/13/2010 04:24:00 | 26.0 | 3/29/2010 22:09:01 | 26.512 |
| 3/29/2010 00:31:01 | 25.859 | 4/13/2010 04:59:00 | 26.0 | 3/29/2010 22:29:01 | 26.512 |
| 3/29/2010 00:51:01 | 25.859 | 4/13/2010 05:34:00 | 26.0 | 3/29/2010 22:49:01 | 26.512 |
| 3/29/2010 01:11:01 | 25.859 | 4/13/2010 06:09:00 | 26.0 | 3/29/2010 23:09:01 | 26.512 |
| 3/29/2010 01:31:01 | 25.859 | 4/13/2010 06:44:00 | 26.0 | 3/29/2010 23:29:01 | 26.512 |
| 3/29/2010 01:51:01 | 25.859 | 4/13/2010 07:19:00 | 26.0 | 3/29/2010 23:49:01 | 26.512 |
| 3/29/2010 02:11:01 | 25.859 | 4/13/2010 07:54:00 | 26.0 | 3/30/2010 00:09:01 | 26.574 |
| 3/29/2010 02:31:01 | 25.859 | 4/13/2010 08:29:00 | 26.0 | 3/30/2010 00:29:01 | 26.574 |
| 3/29/2010 02:51:01 | 25.859 | 4/13/2010 09:04:00 | 26.0 | 3/30/2010 00:49:01 | 26.574 |
| 3/29/2010 03:11:01 | 25.859 | 4/13/2010 09:39:00 | 26.0 | 3/30/2010 01:09:01 | 26.574 |
| 3/29/2010 03:31:01 | 25.859 | 4/13/2010 10:14:00 | 26.0 | 3/30/2010 01:29:01 | 26.574 |
| 3/29/2010 03:51:01 | 25.859 | 4/13/2010 10:49:00 | 26.0 | 3/30/2010 01:49:01 | 26.574 |
| 3/29/2010 04:11:01 | 25.859 | 4/13/2010 11:24:00 | 26.0 | 3/30/2010 02:09:01 | 26.574 |
| 3/29/2010 04:31:01 | 25.859 | 4/13/2010 11:59:00 | 26.0 | 3/30/2010 02:29:01 | 26.574 |
| 3/29/2010 04:51:01 | 25.859 | 4/13/2010 12:34:00 | 26.0 | 3/30/2010 02:49:01 | 26.574 |
| 3/29/2010 05:11:01 | 25.859 | 4/13/2010 13:09:00 | 26.0 | 3/30/2010 03:09:01 | 26.574 |
| 3/29/2010 05:31:01 | 25.859 | 4/13/2010 13:44:00 | 26.0 | 3/30/2010 03:29:01 | 26.574 |
| 3/29/2010 05:51:01 | 25.859 | 4/13/2010 14:19:00 | 26.0 | 3/30/2010 03:49:01 | 26.574 |
| 3/29/2010 06:11:01 | 25.859 | 4/13/2010 14:54:00 | 26.0 | 3/30/2010 04:09:01 | 26.574 |
| 3/29/2010 06:31:01 | 25.859 | 4/13/2010 15:29:00 | 26.0 | 3/30/2010 04:29:01 | 26.574 |
| 3/29/2010 06:51:01 | 25.859 | 4/13/2010 16:04:00 | 26.0 | 3/30/2010 04:49:01 | 26.574 |
| 3/29/2010 07:11:01 | 25.859 | 4/13/2010 16:39:00 | 26.5 | 3/30/2010 05:09:01 | 26.574 |
| 3/29/2010 07:31:01 | 25.859 | 4/13/2010 17:14:00 | 26.0 | 3/30/2010 05:29:01 | 26.574 |

|                    |        |                    |      |                    |        |
|--------------------|--------|--------------------|------|--------------------|--------|
| 3/29/2010 07:51:01 | 25.859 | 4/13/2010 17:49:00 | 26.5 | 3/30/2010 05:49:01 | 26.574 |
| 3/29/2010 08:11:01 | 25.859 | 4/13/2010 18:24:00 | 26.5 | 3/30/2010 06:09:01 | 26.574 |
| 3/29/2010 08:31:01 | 25.859 | 4/13/2010 18:59:00 | 26.5 | 3/30/2010 06:29:01 | 26.574 |
| 3/29/2010 08:51:01 | 25.859 | 4/13/2010 19:34:00 | 26.5 | 3/30/2010 06:49:01 | 26.574 |
| 3/29/2010 09:11:01 | 25.859 | 4/13/2010 20:09:00 | 26.5 | 3/30/2010 07:09:01 | 26.574 |
| 3/29/2010 09:31:01 | 25.859 | 4/13/2010 20:44:00 | 26.5 | 3/30/2010 07:29:01 | 26.512 |
| 3/29/2010 09:51:01 | 25.859 | 4/13/2010 21:19:00 | 26.5 | 3/30/2010 07:49:01 | 26.512 |
| 3/29/2010 10:11:01 | 25.859 | 4/13/2010 21:54:00 | 26.5 | 3/30/2010 08:09:01 | 26.512 |
| 3/29/2010 10:31:01 | 25.859 | 4/13/2010 22:29:00 | 26.5 | 3/30/2010 08:29:01 | 26.512 |
| 3/29/2010 10:51:01 | 25.859 | 4/13/2010 23:04:00 | 26.5 | 3/30/2010 08:49:01 | 26.512 |
| 3/29/2010 11:11:01 | 25.859 | 4/13/2010 23:39:00 | 26.5 | 3/30/2010 09:09:01 | 26.512 |
| 3/29/2010 11:31:01 | 25.859 | 4/14/2010 00:14:00 | 26.0 | 3/30/2010 09:29:01 | 26.512 |
| 3/29/2010 11:51:01 | 25.859 | 4/14/2010 00:49:00 | 26.0 | 3/30/2010 09:49:01 | 26.512 |
| 3/29/2010 12:11:01 | 25.859 | 4/14/2010 01:24:00 | 26.0 | 3/30/2010 10:09:01 | 26.512 |
| 3/29/2010 12:31:01 | 25.859 | 4/14/2010 01:59:00 | 26.0 | 3/30/2010 10:29:01 | 26.512 |
| 3/29/2010 12:51:01 | 25.859 | 4/14/2010 02:34:00 | 26.0 | 3/30/2010 10:49:01 | 26.512 |
| 3/29/2010 13:11:01 | 25.859 | 4/14/2010 03:09:00 | 26.0 | 3/30/2010 11:09:01 | 26.512 |
| 3/29/2010 13:31:01 | 25.859 | 4/14/2010 03:44:00 | 26.0 | 3/30/2010 11:29:01 | 26.512 |
| 3/29/2010 13:51:01 | 25.859 | 4/14/2010 04:19:00 | 26.0 | 3/30/2010 11:49:01 | 26.512 |
| 3/29/2010 14:11:01 | 25.859 | 4/14/2010 04:54:00 | 26.0 | 3/30/2010 12:09:01 | 26.512 |
| 3/29/2010 14:31:01 | 25.859 | 4/14/2010 05:29:00 | 26.0 | 3/30/2010 12:29:01 | 26.512 |
| 3/29/2010 14:51:01 | 25.859 | 4/14/2010 06:04:00 | 26.0 | 3/30/2010 12:49:01 | 26.512 |
| 3/29/2010 15:11:01 | 25.859 | 4/14/2010 06:39:00 | 26.0 | 3/30/2010 13:09:01 | 26.449 |
| 3/29/2010 15:31:01 | 25.859 | 4/14/2010 07:14:00 | 25.5 | 3/30/2010 13:29:01 | 26.449 |
| 3/29/2010 15:51:01 | 25.797 | 4/14/2010 07:49:00 | 25.5 | 3/30/2010 13:49:01 | 26.449 |
| 3/29/2010 16:11:01 | 25.797 | 4/14/2010 08:24:00 | 25.5 | 3/30/2010 14:09:01 | 26.449 |
| 3/29/2010 16:31:01 | 25.859 | 4/14/2010 08:59:00 | 25.5 | 3/30/2010 14:29:01 | 26.449 |
| 3/29/2010 16:51:01 | 25.859 | 4/14/2010 09:34:00 | 25.5 | 3/30/2010 14:49:01 | 26.449 |
| 3/29/2010 17:11:01 | 25.797 | 4/14/2010 10:09:00 | 25.5 | 3/30/2010 15:09:01 | 26.449 |
| 3/29/2010 17:31:01 | 25.859 | 4/14/2010 10:44:00 | 25.5 | 3/30/2010 15:29:01 | 26.449 |
| 3/29/2010 17:51:01 | 25.797 | 4/14/2010 11:19:00 | 25.5 | 3/30/2010 15:49:01 | 26.449 |
| 3/29/2010 18:11:01 | 25.859 | 4/14/2010 11:54:00 | 25.5 | 3/30/2010 16:09:01 | 26.449 |
| 3/29/2010 18:31:01 | 25.859 | 4/14/2010 12:29:00 | 25.5 | 3/30/2010 16:29:01 | 26.449 |
| 3/29/2010 18:51:01 | 25.859 | 4/14/2010 13:04:00 | 25.5 | 3/30/2010 16:49:01 | 26.449 |
| 3/29/2010 19:11:01 | 25.859 | 4/14/2010 13:39:00 | 25.5 | 3/30/2010 17:09:01 | 26.449 |
| 3/29/2010 19:31:01 | 25.859 | 4/14/2010 14:14:00 | 25.5 | 3/30/2010 17:29:01 | 26.449 |
| 3/29/2010 19:51:01 | 25.859 | 4/14/2010 14:49:00 | 26.0 | 3/30/2010 17:49:01 | 26.449 |
| 3/29/2010 20:11:01 | 25.859 | 4/14/2010 15:24:00 | 26.0 | 3/30/2010 18:09:01 | 26.449 |
| 3/29/2010 20:31:01 | 25.859 | 4/14/2010 15:59:00 | 26.0 | 3/30/2010 18:29:01 | 26.449 |
| 3/29/2010 20:51:01 | 25.859 | 4/14/2010 16:34:00 | 26.0 | 3/30/2010 18:49:01 | 26.512 |
| 3/29/2010 21:11:01 | 25.859 | 4/14/2010 17:09:00 | 26.0 | 3/30/2010 19:09:01 | 26.512 |
| 3/29/2010 21:31:01 | 25.859 | 4/14/2010 17:44:00 | 26.0 | 3/30/2010 19:29:01 | 26.512 |
| 3/29/2010 21:51:01 | 25.859 | 4/14/2010 18:19:00 | 26.0 | 3/30/2010 19:49:01 | 26.512 |
| 3/29/2010 22:11:01 | 25.859 | 4/14/2010 18:54:00 | 26.5 | 3/30/2010 20:09:01 | 26.512 |
| 3/29/2010 22:31:01 | 25.859 | 4/14/2010 19:29:00 | 26.5 | 3/30/2010 20:29:01 | 26.512 |
| 3/29/2010 22:51:01 | 25.859 | 4/14/2010 20:04:00 | 26.5 | 3/30/2010 20:49:01 | 26.512 |
| 3/29/2010 23:11:01 | 25.859 | 4/14/2010 20:39:00 | 26.5 | 3/30/2010 21:09:01 | 26.512 |
| 3/29/2010 23:31:01 | 25.922 | 4/14/2010 21:14:00 | 26.5 | 3/30/2010 21:29:01 | 26.512 |
| 3/29/2010 23:51:01 | 25.922 | 4/14/2010 21:49:00 | 26.5 | 3/30/2010 21:49:01 | 26.512 |
| 3/30/2010 00:11:01 | 25.922 | 4/14/2010 22:24:00 | 26.5 | 3/30/2010 22:09:01 | 26.574 |

|                    |        |                    |      |                    |        |
|--------------------|--------|--------------------|------|--------------------|--------|
| 3/30/2010 00:31:01 | 25.922 | 4/14/2010 22:59:00 | 26.0 | 3/30/2010 22:29:01 | 26.574 |
| 3/30/2010 00:51:01 | 25.922 | 4/14/2010 23:34:00 | 26.0 | 3/30/2010 22:49:01 | 26.574 |
| 3/30/2010 01:11:01 | 25.922 | 4/15/2010 00:09:00 | 26.0 | 3/30/2010 23:09:01 | 26.574 |
| 3/30/2010 01:31:01 | 25.922 | 4/15/2010 00:44:00 | 26.0 | 3/30/2010 23:29:01 | 26.574 |
| 3/30/2010 01:51:01 | 25.922 | 4/15/2010 01:19:00 | 26.0 | 3/30/2010 23:49:01 | 26.574 |
| 3/30/2010 02:11:01 | 25.922 | 4/15/2010 01:54:00 | 26.0 | 3/31/2010 00:09:01 | 26.574 |
| 3/30/2010 02:31:01 | 25.922 | 4/15/2010 02:29:00 | 26.0 | 3/31/2010 00:29:01 | 26.574 |
| 3/30/2010 02:51:01 | 25.922 | 4/15/2010 03:04:00 | 26.0 | 3/31/2010 00:49:01 | 26.574 |
| 3/30/2010 03:11:01 | 25.922 | 4/15/2010 03:39:00 | 26.0 | 3/31/2010 01:09:01 | 26.574 |
| 3/30/2010 03:31:01 | 25.922 | 4/15/2010 04:14:00 | 26.5 | 3/31/2010 01:29:01 | 26.574 |
| 3/30/2010 03:51:01 | 25.922 | 4/15/2010 04:49:00 | 26.5 | 3/31/2010 01:49:01 | 26.574 |
| 3/30/2010 04:11:01 | 25.922 | 4/15/2010 05:24:00 | 26.0 | 3/31/2010 02:09:01 | 26.574 |
| 3/30/2010 04:31:01 | 25.922 | 4/15/2010 05:59:00 | 26.0 | 3/31/2010 02:29:01 | 26.574 |
| 3/30/2010 04:51:01 | 25.922 | 4/15/2010 06:34:00 | 26.0 | 3/31/2010 02:49:01 | 26.574 |
| 3/30/2010 05:11:01 | 25.922 | 4/15/2010 07:09:00 | 26.0 | 3/31/2010 03:09:01 | 26.574 |
| 3/30/2010 05:31:01 | 25.922 | 4/15/2010 07:44:00 | 26.0 | 3/31/2010 03:29:01 | 26.574 |
| 3/30/2010 05:51:01 | 25.922 | 4/15/2010 08:19:00 | 26.0 | 3/31/2010 03:49:01 | 26.574 |
| 3/30/2010 06:11:01 | 25.922 | 4/15/2010 08:54:00 | 26.0 | 3/31/2010 04:09:01 | 26.574 |
| 3/30/2010 06:31:01 | 25.922 | 4/15/2010 09:29:00 | 26.0 | 3/31/2010 04:29:01 | 26.574 |
| 3/30/2010 06:51:01 | 25.922 | 4/15/2010 10:04:00 | 26.0 | 3/31/2010 04:49:01 | 26.574 |
| 3/30/2010 07:11:01 | 25.922 | 4/15/2010 10:39:00 | 26.0 | 3/31/2010 05:09:01 | 26.574 |
| 3/30/2010 07:31:01 | 25.922 | 4/15/2010 11:14:00 | 26.0 | 3/31/2010 05:29:01 | 26.574 |
| 3/30/2010 07:51:01 | 25.922 | 4/15/2010 11:49:00 | 25.5 | 3/31/2010 05:49:01 | 26.574 |
| 3/30/2010 08:11:01 | 25.922 | 4/15/2010 12:24:00 | 26.0 | 3/31/2010 06:09:01 | 26.574 |
| 3/30/2010 08:31:01 | 25.859 | 4/15/2010 12:59:00 | 26.0 | 3/31/2010 06:29:01 | 26.574 |
| 3/30/2010 08:51:01 | 25.859 | 4/15/2010 13:34:00 | 26.0 | 3/31/2010 06:49:01 | 26.574 |
| 3/30/2010 09:11:01 | 25.859 | 4/15/2010 14:09:00 | 26.0 | 3/31/2010 07:09:01 | 26.574 |
| 3/30/2010 09:31:01 | 25.859 | 4/15/2010 14:44:00 | 26.0 | 3/31/2010 07:29:01 | 26.574 |
| 3/30/2010 09:51:01 | 25.859 | 4/15/2010 15:19:00 | 26.0 | 3/31/2010 07:49:01 | 26.574 |
| 3/30/2010 10:11:01 | 25.859 | 4/15/2010 15:54:00 | 26.0 | 3/31/2010 08:09:01 | 26.574 |
| 3/30/2010 10:31:01 | 25.859 | 4/15/2010 16:29:00 | 26.0 | 3/31/2010 08:29:01 | 26.574 |
| 3/30/2010 10:51:01 | 25.859 | 4/15/2010 17:04:00 | 26.0 | 3/31/2010 08:49:01 | 26.574 |
| 3/30/2010 11:11:01 | 25.859 | 4/15/2010 17:39:00 | 26.0 | 3/31/2010 09:09:01 | 26.574 |
| 3/30/2010 11:31:01 | 25.859 | 4/15/2010 18:14:00 | 26.0 | 3/31/2010 09:29:01 | 26.574 |
| 3/30/2010 11:51:01 | 25.859 | 4/15/2010 18:49:00 | 26.0 | 3/31/2010 09:49:01 | 26.512 |
| 3/30/2010 12:11:01 | 25.859 | 4/15/2010 19:24:00 | 26.0 | 3/31/2010 10:09:01 | 26.512 |
| 3/30/2010 12:31:01 | 25.859 | 4/15/2010 19:59:00 | 26.0 | 3/31/2010 10:29:01 | 26.512 |
| 3/30/2010 12:51:01 | 25.859 | 4/15/2010 20:34:00 | 26.0 | 3/31/2010 10:49:01 | 26.512 |
| 3/30/2010 13:11:01 | 25.859 | 4/15/2010 21:09:00 | 26.0 | 3/31/2010 11:09:01 | 26.512 |
| 3/30/2010 13:31:01 | 25.859 | 4/15/2010 21:44:00 | 26.0 | 3/31/2010 11:29:01 | 26.512 |
| 3/30/2010 13:51:01 | 25.859 | 4/15/2010 22:19:00 | 26.0 | 3/31/2010 11:49:01 | 26.512 |
| 3/30/2010 14:11:01 | 25.859 | 4/15/2010 22:54:00 | 26.0 | 3/31/2010 12:09:01 | 26.512 |
| 3/30/2010 14:31:01 | 25.859 | 4/15/2010 23:29:00 | 26.0 | 3/31/2010 12:29:01 | 26.512 |
| 3/30/2010 14:51:01 | 25.859 | 4/16/2010 00:04:00 | 26.0 | 3/31/2010 12:49:01 | 26.512 |
| 3/30/2010 15:11:01 | 25.797 | 4/16/2010 00:39:00 | 26.0 | 3/31/2010 13:09:01 | 26.512 |
| 3/30/2010 15:31:01 | 25.859 | 4/16/2010 01:14:00 | 26.0 | 3/31/2010 13:29:01 | 26.512 |
| 3/30/2010 15:51:01 | 25.859 | 4/16/2010 01:49:00 | 26.0 | 3/31/2010 13:49:01 | 26.512 |
| 3/30/2010 16:11:01 | 25.797 | 4/16/2010 02:24:00 | 25.5 | 3/31/2010 14:09:01 | 26.512 |
| 3/30/2010 16:31:01 | 25.797 | 4/16/2010 02:59:00 | 25.5 | 3/31/2010 14:29:01 | 26.512 |
| 3/30/2010 16:51:01 | 25.859 | 4/16/2010 03:34:00 | 25.5 | 3/31/2010 14:49:01 | 26.449 |

|                    |        |                    |      |                    |        |
|--------------------|--------|--------------------|------|--------------------|--------|
| 3/30/2010 17:11:01 | 25.797 | 4/16/2010 04:09:00 | 25.5 | 3/31/2010 15:09:01 | 26.449 |
| 3/30/2010 17:31:01 | 25.797 | 4/16/2010 04:44:00 | 25.5 | 3/31/2010 15:29:01 | 26.449 |
| 3/30/2010 17:51:01 | 25.859 | 4/16/2010 05:19:00 | 25.5 | 3/31/2010 15:49:01 | 26.449 |
| 3/30/2010 18:11:01 | 25.859 | 4/16/2010 05:54:00 | 25.5 | 3/31/2010 16:09:01 | 26.512 |
| 3/30/2010 18:31:01 | 25.859 | 4/16/2010 06:29:00 | 25.5 | 3/31/2010 16:29:01 | 26.449 |
| 3/30/2010 18:51:01 | 25.859 | 4/16/2010 07:04:00 | 25.5 | 3/31/2010 16:49:01 | 26.449 |
| 3/30/2010 19:11:01 | 25.859 | 4/16/2010 07:39:00 | 25.5 | 3/31/2010 17:09:01 | 26.512 |
| 3/30/2010 19:31:01 | 25.859 | 4/16/2010 08:14:00 | 25.5 | 3/31/2010 17:29:01 | 26.512 |
| 3/30/2010 19:51:01 | 25.859 | 4/16/2010 08:49:00 | 25.5 | 3/31/2010 17:49:01 | 26.512 |
| 3/30/2010 20:11:01 | 25.859 | 4/16/2010 09:24:00 | 25.5 | 3/31/2010 18:09:01 | 26.512 |
| 3/30/2010 20:31:01 | 25.859 | 4/16/2010 09:59:00 | 25.5 | 3/31/2010 18:29:01 | 26.512 |
| 3/30/2010 20:51:01 | 25.859 | 4/16/2010 10:34:00 | 25.5 | 3/31/2010 18:49:01 | 26.512 |
| 3/30/2010 21:11:01 | 25.859 | 4/16/2010 11:09:00 | 25.5 | 3/31/2010 19:09:01 | 26.512 |
| 3/30/2010 21:31:01 | 25.859 | 4/16/2010 11:44:00 | 25.5 | 3/31/2010 19:29:01 | 26.512 |
| 3/30/2010 21:51:01 | 25.859 | 4/16/2010 12:19:00 | 25.5 | 3/31/2010 19:49:01 | 26.512 |
| 3/30/2010 22:11:01 | 25.859 | 4/16/2010 12:54:00 | 25.5 | 3/31/2010 20:09:01 | 26.512 |
| 3/30/2010 22:31:01 | 25.859 | 4/16/2010 13:29:00 | 25.5 | 3/31/2010 20:29:01 | 26.512 |
| 3/30/2010 22:51:01 | 25.859 | 4/16/2010 14:04:00 | 25.5 | 3/31/2010 20:49:01 | 26.512 |
| 3/30/2010 23:11:01 | 25.859 | 4/16/2010 14:39:00 | 25.5 | 3/31/2010 21:09:01 | 26.512 |
| 3/30/2010 23:31:01 | 25.859 | 4/16/2010 15:14:00 | 25.5 | 3/31/2010 21:29:01 | 26.512 |
| 3/30/2010 23:51:01 | 25.859 | 4/16/2010 15:49:00 | 25.5 | 3/31/2010 21:49:01 | 26.512 |
| 3/31/2010 00:11:01 | 25.859 | 4/16/2010 16:24:00 | 25.5 | 3/31/2010 22:09:01 | 26.512 |
| 3/31/2010 00:31:01 | 25.859 | 4/16/2010 16:59:00 | 25.5 | 3/31/2010 22:29:01 | 26.574 |
| 3/31/2010 00:51:01 | 25.859 | 4/16/2010 17:34:00 | 25.5 | 3/31/2010 22:49:01 | 26.574 |
| 3/31/2010 01:11:01 | 25.859 | 4/16/2010 18:09:00 | 25.5 | 3/31/2010 23:09:01 | 26.574 |
| 3/31/2010 01:31:01 | 25.859 | 4/16/2010 18:44:00 | 26.0 | 3/31/2010 23:29:01 | 26.574 |
| 3/31/2010 01:51:01 | 25.859 | 4/16/2010 19:19:00 | 26.0 | 3/31/2010 23:49:01 | 26.574 |
| 3/31/2010 02:11:01 | 25.859 | 4/16/2010 19:54:00 | 26.0 | 4/1/2010 00:09:01  | 26.574 |
| 3/31/2010 02:31:01 | 25.859 | 4/16/2010 20:29:00 | 26.0 | 4/1/2010 00:29:01  | 26.574 |
| 3/31/2010 02:51:01 | 25.859 | 4/16/2010 21:04:00 | 26.0 | 4/1/2010 00:49:01  | 26.574 |
| 3/31/2010 03:11:01 | 25.859 | 4/16/2010 21:39:00 | 26.0 | 4/1/2010 01:09:01  | 26.574 |
| 3/31/2010 03:31:01 | 25.859 | 4/16/2010 22:14:00 | 26.0 | 4/1/2010 01:29:01  | 26.574 |
| 3/31/2010 03:51:01 | 25.859 | 4/16/2010 22:49:00 | 25.5 | 4/1/2010 01:49:01  | 26.574 |
| 3/31/2010 04:11:01 | 25.859 | 4/16/2010 23:24:00 | 25.5 | 4/1/2010 02:09:01  | 26.574 |
| 3/31/2010 04:31:01 | 25.859 | 4/16/2010 23:59:00 | 25.5 | 4/1/2010 02:29:01  | 26.574 |
| 3/31/2010 04:51:01 | 25.859 | 4/17/2010 00:34:00 | 25.5 | 4/1/2010 02:49:01  | 26.574 |
| 3/31/2010 05:11:01 | 25.859 | 4/17/2010 01:09:00 | 25.5 | 4/1/2010 03:09:01  | 26.574 |
| 3/31/2010 05:31:01 | 25.859 | 4/17/2010 01:44:00 | 25.5 | 4/1/2010 03:29:01  | 26.574 |
| 3/31/2010 05:51:01 | 25.859 | 4/17/2010 02:19:00 | 25.5 | 4/1/2010 03:49:01  | 26.574 |
| 3/31/2010 06:11:01 | 25.859 | 4/17/2010 02:54:00 | 25.5 | 4/1/2010 04:09:01  | 26.574 |
| 3/31/2010 06:31:01 | 25.859 | 4/17/2010 03:29:00 | 25.5 | 4/1/2010 04:29:01  | 26.574 |
| 3/31/2010 06:51:01 | 25.859 | 4/17/2010 04:04:00 | 25.5 | 4/1/2010 04:49:01  | 26.574 |
| 3/31/2010 07:11:01 | 25.859 | 4/17/2010 04:39:00 | 25.5 | 4/1/2010 05:09:01  | 26.574 |
| 3/31/2010 07:31:01 | 25.859 | 4/17/2010 05:14:00 | 25.5 | 4/1/2010 05:29:01  | 26.574 |
| 3/31/2010 07:51:01 | 25.859 | 4/17/2010 05:49:00 | 25.5 | 4/1/2010 05:49:01  | 26.574 |
| 3/31/2010 08:11:01 | 25.859 | 4/17/2010 06:24:00 | 25.5 | 4/1/2010 06:09:01  | 26.574 |
| 3/31/2010 08:31:01 | 25.859 | 4/17/2010 06:59:00 | 25.5 | 4/1/2010 06:29:01  | 26.574 |
| 3/31/2010 08:51:01 | 25.859 | 4/17/2010 07:34:00 | 25.5 | 4/1/2010 06:49:01  | 26.574 |
| 3/31/2010 09:11:01 | 25.859 | 4/17/2010 08:09:00 | 25.5 | 4/1/2010 07:09:01  | 26.574 |
| 3/31/2010 09:31:01 | 25.859 | 4/17/2010 08:44:00 | 25.5 | 4/1/2010 07:29:01  | 26.574 |

|                    |        |                    |      |                   |        |
|--------------------|--------|--------------------|------|-------------------|--------|
| 3/31/2010 09:51:01 | 25.859 | 4/17/2010 09:19:00 | 25.5 | 4/1/2010 07:49:01 | 26.512 |
| 3/31/2010 10:11:01 | 25.859 | 4/17/2010 09:54:00 | 25.5 | 4/1/2010 08:09:01 | 26.512 |
| 3/31/2010 10:31:01 | 25.859 | 4/17/2010 10:29:00 | 25.5 | 4/1/2010 08:29:01 | 26.512 |
| 3/31/2010 10:51:01 | 25.797 | 4/17/2010 11:04:00 | 25.5 | 4/1/2010 08:49:01 | 26.512 |
| 3/31/2010 11:11:01 | 25.797 | 4/17/2010 11:39:00 | 25.5 | 4/1/2010 09:09:01 | 26.512 |
| 3/31/2010 11:31:01 | 25.797 | 4/17/2010 12:14:00 | 25.5 | 4/1/2010 09:29:01 | 26.512 |
| 3/31/2010 11:51:01 | 25.797 | 4/17/2010 12:49:00 | 25.5 | 4/1/2010 09:49:01 | 26.512 |
| 3/31/2010 12:11:01 | 25.797 | 4/17/2010 13:24:00 | 25.5 | 4/1/2010 10:09:01 | 26.512 |
| 3/31/2010 12:31:01 | 25.797 | 4/17/2010 13:59:00 | 25.5 | 4/1/2010 10:29:01 | 26.512 |
| 3/31/2010 12:51:01 | 25.797 | 4/17/2010 14:34:00 | 25.5 | 4/1/2010 10:49:01 | 26.512 |
| 3/31/2010 13:11:01 | 25.797 | 4/17/2010 15:09:00 | 25.5 | 4/1/2010 11:09:01 | 26.512 |
| 3/31/2010 13:31:01 | 25.797 | 4/17/2010 15:44:00 | 25.5 | 4/1/2010 11:29:01 | 26.512 |
| 3/31/2010 13:51:01 | 25.797 | 4/17/2010 16:19:00 | 25.5 | 4/1/2010 11:49:01 | 26.449 |
| 3/31/2010 14:11:01 | 25.797 | 4/17/2010 16:54:00 | 25.5 | 4/1/2010 12:09:01 | 26.449 |
| 3/31/2010 14:31:01 | 25.797 | 4/17/2010 17:29:00 | 25.5 | 4/1/2010 12:29:01 | 26.449 |
| 3/31/2010 14:51:01 | 25.797 | 4/17/2010 18:04:00 | 25.5 | 4/1/2010 12:49:01 | 26.449 |
| 3/31/2010 15:11:01 | 25.797 | 4/17/2010 18:39:00 | 25.5 | 4/1/2010 13:09:01 | 26.449 |
| 3/31/2010 15:31:01 | 25.797 | 4/17/2010 19:14:00 | 26.0 | 4/1/2010 13:29:01 | 26.449 |
| 3/31/2010 15:51:01 | 25.734 | 4/17/2010 19:49:00 | 26.0 | 4/1/2010 13:49:01 | 26.449 |
| 3/31/2010 16:11:01 | 25.734 | 4/17/2010 20:24:00 | 26.0 | 4/1/2010 14:09:01 | 26.449 |
| 3/31/2010 16:31:01 | 25.734 | 4/17/2010 20:59:00 | 26.0 | 4/1/2010 14:29:01 | 26.449 |
| 3/31/2010 16:51:01 | 25.734 | 4/17/2010 21:34:00 | 26.0 | 4/1/2010 14:49:01 | 26.449 |
| 3/31/2010 17:11:01 | 25.734 | 4/17/2010 22:09:00 | 26.0 | 4/1/2010 15:09:01 | 26.449 |
| 3/31/2010 17:31:01 | 25.797 | 4/17/2010 22:44:00 | 26.0 | 4/1/2010 15:29:01 | 26.449 |
| 3/31/2010 17:51:01 | 25.734 | 4/17/2010 23:19:00 | 26.0 | 4/1/2010 15:49:01 | 26.449 |
| 3/31/2010 18:11:01 | 25.734 | 4/17/2010 23:54:00 | 26.0 | 4/1/2010 16:09:01 | 26.387 |
| 3/31/2010 18:31:01 | 25.797 | 4/18/2010 00:29:00 | 26.0 | 4/1/2010 16:29:01 | 26.387 |
| 3/31/2010 18:51:01 | 25.797 | 4/18/2010 01:04:00 | 26.0 | 4/1/2010 16:49:01 | 26.449 |
| 3/31/2010 19:11:01 | 25.734 | 4/18/2010 01:39:00 | 26.0 | 4/1/2010 17:09:01 | 26.449 |
| 3/31/2010 19:31:01 | 25.797 | 4/18/2010 02:14:00 | 25.5 | 4/1/2010 17:29:01 | 26.449 |
| 3/31/2010 19:51:01 | 25.797 | 4/18/2010 02:49:00 | 25.5 | 4/1/2010 17:49:01 | 26.449 |
| 3/31/2010 20:11:01 | 25.797 | 4/18/2010 03:24:00 | 25.5 | 4/1/2010 18:09:01 | 26.449 |
| 3/31/2010 20:31:01 | 25.797 | 4/18/2010 03:59:00 | 25.5 | 4/1/2010 18:29:01 | 26.449 |
| 3/31/2010 20:51:01 | 25.797 | 4/18/2010 04:34:00 | 25.5 | 4/1/2010 18:49:01 | 26.449 |
| 3/31/2010 21:11:01 | 25.797 | 4/18/2010 05:09:00 | 25.5 | 4/1/2010 19:09:01 | 26.449 |
| 3/31/2010 21:31:01 | 25.797 | 4/18/2010 05:44:00 | 25.5 | 4/1/2010 19:29:01 | 26.449 |
| 3/31/2010 21:51:01 | 25.797 | 4/18/2010 06:19:00 | 25.5 | 4/1/2010 19:49:01 | 26.449 |
| 3/31/2010 22:11:01 | 25.797 | 4/18/2010 06:54:00 | 25.5 | 4/1/2010 20:09:01 | 26.449 |
| 3/31/2010 22:31:01 | 25.797 | 4/18/2010 07:29:00 | 25.5 | 4/1/2010 20:29:01 | 26.449 |
| 3/31/2010 22:51:01 | 25.797 | 4/18/2010 08:04:00 | 25.5 | 4/1/2010 20:49:01 | 26.449 |
| 3/31/2010 23:11:01 | 25.797 | 4/18/2010 08:39:00 | 25.5 | 4/1/2010 21:09:01 | 26.449 |
| 3/31/2010 23:31:01 | 25.797 | 4/18/2010 09:14:00 | 25.5 | 4/1/2010 21:29:01 | 26.449 |
| 3/31/2010 23:51:01 | 25.797 | 4/18/2010 09:49:00 | 25.5 | 4/1/2010 21:49:01 | 26.449 |
| 4/1/2010 00:11:01  | 25.797 | 4/18/2010 10:24:00 | 25.5 | 4/1/2010 22:09:01 | 26.449 |
| 4/1/2010 00:31:01  | 25.797 | 4/18/2010 10:59:00 | 25.5 | 4/1/2010 22:29:01 | 26.512 |
| 4/1/2010 00:51:01  | 25.797 | 4/18/2010 11:34:00 | 25.5 | 4/1/2010 22:49:01 | 26.512 |
| 4/1/2010 01:11:01  | 25.797 | 4/18/2010 12:09:00 | 25.5 | 4/1/2010 23:09:01 | 26.512 |
| 4/1/2010 01:31:01  | 25.797 | 4/18/2010 12:44:00 | 25.5 | 4/1/2010 23:29:01 | 26.512 |
| 4/1/2010 01:51:01  | 25.797 | 4/18/2010 13:19:00 | 25.5 | 4/1/2010 23:49:01 | 26.512 |
| 4/1/2010 02:11:01  | 25.797 | 4/18/2010 13:54:00 | 25.5 | 4/2/2010 00:09:01 | 26.512 |

|                   |        |                    |      |                   |        |
|-------------------|--------|--------------------|------|-------------------|--------|
| 4/1/2010 02:31:01 | 25.797 | 4/18/2010 14:29:00 | 25.5 | 4/2/2010 00:29:01 | 26.512 |
| 4/1/2010 02:51:01 | 25.797 | 4/18/2010 15:04:00 | 25.5 | 4/2/2010 00:49:01 | 26.512 |
| 4/1/2010 03:11:01 | 25.797 | 4/18/2010 15:39:00 | 25.5 | 4/2/2010 01:09:01 | 26.512 |
| 4/1/2010 03:31:01 | 25.797 | 4/18/2010 16:14:00 | 26.0 | 4/2/2010 01:29:01 | 26.512 |
| 4/1/2010 03:51:01 | 25.797 | 4/18/2010 16:49:00 | 26.0 | 4/2/2010 01:49:01 | 26.512 |
| 4/1/2010 04:11:01 | 25.797 | 4/18/2010 17:24:00 | 26.0 | 4/2/2010 02:09:01 | 26.512 |
| 4/1/2010 04:31:01 | 25.797 | 4/18/2010 17:59:00 | 26.0 | 4/2/2010 02:29:01 | 26.512 |
| 4/1/2010 04:51:01 | 25.797 | 4/18/2010 18:34:00 | 26.0 | 4/2/2010 02:49:01 | 26.512 |
| 4/1/2010 05:11:01 | 25.797 | 4/18/2010 19:09:00 | 26.0 | 4/2/2010 03:09:01 | 26.512 |
| 4/1/2010 05:31:01 | 25.734 | 4/18/2010 19:44:00 | 26.0 | 4/2/2010 03:29:01 | 26.512 |
| 4/1/2010 05:51:01 | 25.734 | 4/18/2010 20:19:00 | 26.0 | 4/2/2010 03:49:01 | 26.512 |
| 4/1/2010 06:11:01 | 25.734 | 4/18/2010 20:54:00 | 26.0 | 4/2/2010 04:09:01 | 26.574 |
| 4/1/2010 06:31:01 | 25.734 | 4/18/2010 21:29:00 | 26.0 | 4/2/2010 04:29:01 | 26.574 |
| 4/1/2010 06:51:01 | 25.734 | 4/18/2010 22:04:00 | 26.0 | 4/2/2010 04:49:01 | 26.574 |
| 4/1/2010 07:11:01 | 25.734 | 4/18/2010 22:39:00 | 26.5 | 4/2/2010 05:09:01 | 26.574 |
| 4/1/2010 07:31:01 | 25.734 | 4/18/2010 23:14:00 | 26.5 | 4/2/2010 05:29:01 | 26.574 |
| 4/1/2010 07:51:01 | 25.734 | 4/18/2010 23:49:00 | 26.5 | 4/2/2010 05:49:01 | 26.574 |
| 4/1/2010 08:11:01 | 25.734 | 4/19/2010 00:24:00 | 26.0 | 4/2/2010 06:09:01 | 26.574 |
| 4/1/2010 08:31:01 | 25.734 | 4/19/2010 00:59:00 | 26.0 | 4/2/2010 06:29:01 | 26.574 |
| 4/1/2010 08:51:01 | 25.734 | 4/19/2010 01:34:00 | 26.0 | 4/2/2010 06:49:01 | 26.574 |
| 4/1/2010 09:11:01 | 25.734 | 4/19/2010 02:09:00 | 26.0 | 4/2/2010 07:09:01 | 26.574 |
| 4/1/2010 09:31:01 | 25.734 | 4/19/2010 02:44:00 | 26.0 | 4/2/2010 07:29:01 | 26.574 |
| 4/1/2010 09:51:01 | 25.734 | 4/19/2010 03:19:00 | 26.0 | 4/2/2010 07:49:01 | 26.574 |
| 4/1/2010 10:11:01 | 25.672 | 4/19/2010 03:54:00 | 26.0 | 4/2/2010 08:09:01 | 26.574 |
| 4/1/2010 10:31:01 | 25.672 | 4/19/2010 04:29:00 | 26.0 | 4/2/2010 08:29:01 | 26.574 |
| 4/1/2010 10:51:01 | 25.672 | 4/19/2010 05:04:00 | 25.5 | 4/2/2010 08:49:01 | 26.574 |
| 4/1/2010 11:11:01 | 25.672 | 4/19/2010 05:39:00 | 25.5 | 4/2/2010 09:09:01 | 26.574 |
| 4/1/2010 11:31:01 | 25.672 | 4/19/2010 06:14:00 | 25.5 | 4/2/2010 09:29:01 | 26.574 |
| 4/1/2010 11:51:01 | 25.672 | 4/19/2010 06:49:00 | 25.5 | 4/2/2010 09:49:01 | 26.574 |
| 4/1/2010 12:11:01 | 25.672 | 4/19/2010 07:24:00 | 25.5 | 4/2/2010 10:09:01 | 26.574 |
| 4/1/2010 12:31:01 | 25.672 | 4/19/2010 07:59:00 | 25.5 | 4/2/2010 10:29:01 | 26.512 |
| 4/1/2010 12:51:01 | 25.672 | 4/19/2010 08:34:00 | 25.5 | 4/2/2010 10:49:01 | 26.512 |
| 4/1/2010 13:11:01 | 25.672 | 4/19/2010 09:09:00 | 25.5 | 4/2/2010 11:09:01 | 26.512 |
| 4/1/2010 13:31:01 | 25.672 | 4/19/2010 09:44:00 | 25.5 | 4/2/2010 11:29:01 | 26.512 |
| 4/1/2010 13:51:01 | 25.609 | 4/19/2010 10:19:00 | 25.5 | 4/2/2010 11:49:01 | 26.512 |
| 4/1/2010 14:11:01 | 25.609 | 4/19/2010 10:54:00 | 25.5 | 4/2/2010 12:09:01 | 26.512 |
| 4/1/2010 14:31:01 | 25.609 | 4/19/2010 11:29:00 | 25.5 | 4/2/2010 12:29:01 | 26.512 |
| 4/1/2010 14:51:01 | 25.609 | 4/19/2010 12:04:00 | 25.5 | 4/2/2010 12:49:01 | 26.512 |
| 4/1/2010 15:11:01 | 25.609 | 4/19/2010 12:39:00 | 25.5 | 4/2/2010 13:09:01 | 26.512 |
| 4/1/2010 15:31:01 | 25.609 | 4/19/2010 13:14:00 | 25.5 | 4/2/2010 13:29:01 | 26.512 |
| 4/1/2010 15:51:01 | 25.609 | 4/19/2010 13:49:00 | 25.5 | 4/2/2010 13:49:01 | 26.512 |
| 4/1/2010 16:11:01 | 25.609 | 4/19/2010 14:24:00 | 25.5 | 4/2/2010 14:09:01 | 26.512 |
| 4/1/2010 16:31:01 | 25.609 | 4/19/2010 14:59:00 | 26.0 | 4/2/2010 14:29:01 | 26.512 |
| 4/1/2010 16:51:01 | 25.609 | 4/19/2010 15:34:00 | 26.0 | 4/2/2010 14:49:01 | 26.512 |
| 4/1/2010 17:11:01 | 25.609 | 4/19/2010 16:09:00 | 26.0 | 4/2/2010 15:09:01 | 26.512 |
| 4/1/2010 17:31:01 | 25.609 | 4/19/2010 16:44:00 | 26.0 | 4/2/2010 15:29:01 | 26.512 |
| 4/1/2010 17:51:01 | 25.609 | 4/19/2010 17:19:00 | 26.0 | 4/2/2010 15:49:01 | 26.512 |
| 4/1/2010 18:11:01 | 25.609 | 4/19/2010 17:54:00 | 26.0 | 4/2/2010 16:09:01 | 26.512 |
| 4/1/2010 18:31:01 | 25.609 | 4/19/2010 18:29:00 | 26.0 | 4/2/2010 16:29:01 | 26.512 |
| 4/1/2010 18:51:01 | 25.609 | 4/19/2010 19:04:00 | 26.0 | 4/2/2010 16:49:01 | 26.512 |

|                   |        |                    |      |                   |        |
|-------------------|--------|--------------------|------|-------------------|--------|
| 4/1/2010 19:11:01 | 25.609 | 4/19/2010 19:39:00 | 26.0 | 4/2/2010 17:09:01 | 26.512 |
| 4/1/2010 19:31:01 | 25.609 | 4/19/2010 20:14:00 | 26.0 | 4/2/2010 17:29:01 | 26.512 |
| 4/1/2010 19:51:01 | 25.609 | 4/19/2010 20:49:00 | 26.0 | 4/2/2010 17:49:01 | 26.512 |
| 4/1/2010 20:11:01 | 25.609 | 4/19/2010 21:24:00 | 26.0 | 4/2/2010 18:09:01 | 26.512 |
| 4/1/2010 20:31:01 | 25.609 | 4/19/2010 21:59:00 | 26.0 | 4/2/2010 18:29:01 | 26.512 |
| 4/1/2010 20:51:01 | 25.609 | 4/19/2010 22:34:00 | 26.0 | 4/2/2010 18:49:01 | 26.512 |
| 4/1/2010 21:11:01 | 25.609 | 4/19/2010 23:09:00 | 26.0 | 4/2/2010 19:09:01 | 26.512 |
| 4/1/2010 21:31:01 | 25.609 | 4/19/2010 23:44:00 | 26.0 | 4/2/2010 19:29:01 | 26.512 |
| 4/1/2010 21:51:01 | 25.609 | 4/20/2010 00:19:00 | 26.0 | 4/2/2010 19:49:01 | 26.512 |
| 4/1/2010 22:11:01 | 25.609 | 4/20/2010 00:54:00 | 26.0 | 4/2/2010 20:09:01 | 26.512 |
| 4/1/2010 22:31:01 | 25.609 | 4/20/2010 01:29:00 | 26.0 | 4/2/2010 20:29:01 | 26.512 |
| 4/1/2010 22:51:01 | 25.609 | 4/20/2010 02:04:00 | 26.0 | 4/2/2010 20:49:01 | 26.574 |
| 4/1/2010 23:11:01 | 25.609 | 4/20/2010 02:39:00 | 26.0 | 4/2/2010 21:09:01 | 26.574 |
| 4/1/2010 23:31:01 | 25.609 | 4/20/2010 03:14:00 | 26.0 | 4/2/2010 21:29:01 | 26.574 |
| 4/1/2010 23:51:01 | 25.609 | 4/20/2010 03:49:00 | 26.0 | 4/2/2010 21:49:01 | 26.574 |
| 4/2/2010 00:11:01 | 25.609 | 4/20/2010 04:24:00 | 26.0 | 4/2/2010 22:09:01 | 26.574 |
| 4/2/2010 00:31:01 | 25.672 | 4/20/2010 04:59:00 | 26.0 | 4/2/2010 22:29:01 | 26.574 |
| 4/2/2010 00:51:01 | 25.672 | 4/20/2010 05:34:00 | 26.0 | 4/2/2010 22:49:01 | 26.574 |
| 4/2/2010 01:11:01 | 25.672 | 4/20/2010 06:09:00 | 26.0 | 4/2/2010 23:09:01 | 26.574 |
| 4/2/2010 01:31:01 | 25.672 | 4/20/2010 06:44:00 | 26.0 | 4/2/2010 23:29:01 | 26.574 |
| 4/2/2010 01:51:01 | 25.672 | 4/20/2010 07:19:00 | 26.0 | 4/2/2010 23:49:01 | 26.574 |
| 4/2/2010 02:11:01 | 25.672 | 4/20/2010 07:54:00 | 26.0 | 4/3/2010 00:09:01 | 26.637 |
| 4/2/2010 02:31:01 | 25.672 | 4/20/2010 08:29:00 | 26.0 | 4/3/2010 00:29:01 | 26.637 |
| 4/2/2010 02:51:01 | 25.672 | 4/20/2010 09:04:00 | 26.0 | 4/3/2010 00:49:01 | 26.637 |
| 4/2/2010 03:11:01 | 25.672 | 4/20/2010 09:39:00 | 26.0 | 4/3/2010 01:09:01 | 26.637 |
| 4/2/2010 03:31:01 | 25.672 | 4/20/2010 10:14:00 | 26.0 | 4/3/2010 01:29:01 | 26.637 |
| 4/2/2010 03:51:01 | 25.672 | 4/20/2010 10:49:00 | 26.0 | 4/3/2010 01:49:01 | 26.637 |
| 4/2/2010 04:11:01 | 25.672 | 4/20/2010 11:24:00 | 26.0 | 4/3/2010 02:09:01 | 26.637 |
| 4/2/2010 04:31:01 | 25.672 | 4/20/2010 11:59:00 | 26.0 | 4/3/2010 02:29:01 | 26.637 |
| 4/2/2010 04:51:01 | 25.672 | 4/20/2010 12:34:00 | 26.0 | 4/3/2010 02:49:01 | 26.637 |
| 4/2/2010 05:11:01 | 25.672 | 4/20/2010 13:09:00 | 26.0 | 4/3/2010 03:09:01 | 26.637 |
| 4/2/2010 05:31:01 | 25.672 | 4/20/2010 13:44:00 | 26.0 | 4/3/2010 03:29:01 | 26.637 |
| 4/2/2010 05:51:01 | 25.672 | 4/20/2010 14:19:00 | 26.0 | 4/3/2010 03:49:01 | 26.637 |
| 4/2/2010 06:11:01 | 25.672 | 4/20/2010 14:54:00 | 26.0 | 4/3/2010 04:09:01 | 26.637 |
| 4/2/2010 06:31:01 | 25.672 | 4/20/2010 15:29:00 | 26.0 | 4/3/2010 04:29:01 | 26.637 |
| 4/2/2010 06:51:01 | 25.672 | 4/20/2010 16:04:00 | 26.0 | 4/3/2010 04:49:01 | 26.637 |
| 4/2/2010 07:11:01 | 25.672 | 4/20/2010 16:39:00 | 26.0 | 4/3/2010 05:09:01 | 26.637 |
| 4/2/2010 07:31:01 | 25.672 | 4/20/2010 17:14:00 | 26.0 | 4/3/2010 05:29:01 | 26.637 |
| 4/2/2010 07:51:01 | 25.672 | 4/20/2010 17:49:00 | 26.0 | 4/3/2010 05:49:01 | 26.637 |
| 4/2/2010 08:11:01 | 25.672 | 4/20/2010 18:24:00 | 26.0 | 4/3/2010 06:09:01 | 26.637 |
| 4/2/2010 08:31:01 | 25.672 | 4/20/2010 18:59:00 | 26.0 | 4/3/2010 06:29:01 | 26.637 |
| 4/2/2010 08:51:01 | 25.672 | 4/20/2010 19:34:00 | 26.0 | 4/3/2010 06:49:01 | 26.637 |
| 4/2/2010 09:11:01 | 25.672 | 4/20/2010 20:09:00 | 26.0 | 4/3/2010 07:09:01 | 26.637 |
| 4/2/2010 09:31:01 | 25.672 | 4/20/2010 20:44:00 | 26.0 | 4/3/2010 07:29:01 | 26.637 |
| 4/2/2010 09:51:01 | 25.672 | 4/20/2010 21:19:00 | 26.0 | 4/3/2010 07:49:01 | 26.637 |
| 4/2/2010 10:11:01 | 25.672 | 4/20/2010 21:54:00 | 26.0 | 4/3/2010 08:09:01 | 26.637 |
| 4/2/2010 10:31:01 | 25.672 | 4/20/2010 22:29:00 | 26.0 | 4/3/2010 08:29:01 | 26.637 |
| 4/2/2010 10:51:01 | 25.672 | 4/20/2010 23:04:00 | 26.5 | 4/3/2010 08:49:01 | 26.637 |
| 4/2/2010 11:11:01 | 25.672 | 4/20/2010 23:39:00 | 26.5 | 4/3/2010 09:09:01 | 26.637 |
| 4/2/2010 11:31:01 | 25.672 | 4/21/2010 00:14:00 | 26.0 | 4/3/2010 09:29:01 | 26.637 |



|                   |                           |                        |        |
|-------------------|---------------------------|------------------------|--------|
| 4/2/2010 11:51:01 | 25.609 4/21/2010 00:49:00 | 26.0 4/3/2010 09:49:01 | 26.637 |
| 4/2/2010 12:11:01 | 25.609 4/21/2010 01:24:00 | 26.0 4/3/2010 10:09:01 | 26.637 |
| 4/2/2010 12:31:01 | 25.609 4/21/2010 01:59:00 | 26.0 4/3/2010 10:29:01 | 26.637 |
| 4/2/2010 12:51:01 | 25.609 4/21/2010 02:34:00 | 26.0 4/3/2010 10:49:01 | 26.637 |
| 4/2/2010 13:11:01 | 25.609 4/21/2010 03:09:00 | 26.0 4/3/2010 11:09:01 | 26.637 |
| 4/2/2010 13:31:01 | 25.609 4/21/2010 03:44:00 | 26.0 4/3/2010 11:29:01 | 26.637 |
| 4/2/2010 13:51:01 | 25.609 4/21/2010 04:19:00 | 26.0 4/3/2010 11:49:01 | 26.637 |
| 4/2/2010 14:11:01 | 25.609 4/21/2010 04:54:00 | 26.0 4/3/2010 12:09:01 | 26.637 |
| 4/2/2010 14:31:01 | 25.609 4/21/2010 05:29:00 | 26.0 4/3/2010 12:29:01 | 26.637 |
| 4/2/2010 14:51:01 | 25.609 4/21/2010 06:04:00 | 26.0 4/3/2010 12:49:01 | 26.637 |
| 4/2/2010 15:11:01 | 25.609 4/21/2010 06:39:00 | 26.0 4/3/2010 13:09:01 | 26.637 |
| 4/2/2010 15:31:01 | 25.609 4/21/2010 07:14:00 | 26.0 4/3/2010 13:29:01 | 26.574 |
| 4/2/2010 15:51:01 | 25.609 4/21/2010 07:49:00 | 26.0 4/3/2010 13:49:01 | 26.574 |
| 4/2/2010 16:11:01 | 25.609 4/21/2010 08:24:00 | 26.0 4/3/2010 14:09:01 | 26.574 |
| 4/2/2010 16:31:01 | 25.609 4/21/2010 08:59:00 | 26.0 4/3/2010 14:29:01 | 26.574 |
| 4/2/2010 16:51:01 | 25.609 4/21/2010 09:34:00 | 26.0 4/3/2010 14:49:01 | 26.574 |
| 4/2/2010 17:11:01 | 25.609 4/21/2010 10:09:00 | 26.0 4/3/2010 15:09:01 | 26.574 |
| 4/2/2010 17:31:01 | 25.609 4/21/2010 10:44:00 | 25.5 4/3/2010 15:29:01 | 26.574 |
| 4/2/2010 17:51:01 | 25.609 4/21/2010 11:19:00 | 25.5 4/3/2010 15:49:01 | 26.574 |
| 4/2/2010 18:11:01 | 25.609 4/21/2010 11:54:00 | 25.5 4/3/2010 16:09:01 | 26.574 |
| 4/2/2010 18:31:01 | 25.609 4/21/2010 12:29:00 | 25.5 4/3/2010 16:29:01 | 26.574 |
| 4/2/2010 18:51:01 | 25.609 4/21/2010 13:04:00 | 25.5 4/3/2010 16:49:01 | 26.574 |
| 4/2/2010 19:11:01 | 25.609 4/21/2010 13:39:00 | 26.0 4/3/2010 17:09:01 | 26.574 |
| 4/2/2010 19:31:01 | 25.609 4/21/2010 14:14:00 | 26.0 4/3/2010 17:29:01 | 26.574 |
| 4/2/2010 19:51:01 | 25.609 4/21/2010 14:49:00 | 26.0 4/3/2010 17:49:01 | 26.574 |
| 4/2/2010 20:11:01 | 25.609 4/21/2010 15:24:00 | 26.0 4/3/2010 18:09:01 | 26.574 |
| 4/2/2010 20:31:01 | 25.609 4/21/2010 15:59:00 | 26.0 4/3/2010 18:29:01 | 26.574 |
| 4/2/2010 20:51:01 | 25.609 4/21/2010 16:34:00 | 26.0 4/3/2010 18:49:01 | 26.574 |
| 4/2/2010 21:11:01 | 25.672 4/21/2010 17:09:00 | 26.0 4/3/2010 19:09:01 | 26.574 |
| 4/2/2010 21:31:01 | 25.672 4/21/2010 17:44:00 | 26.0 4/3/2010 19:29:01 | 26.637 |
| 4/2/2010 21:51:01 | 25.672 4/21/2010 18:19:00 | 26.0 4/3/2010 19:49:01 | 26.637 |
| 4/2/2010 22:11:01 | 25.672 4/21/2010 18:54:00 | 26.0 4/3/2010 20:09:01 | 26.637 |
| 4/2/2010 22:31:01 | 25.672 4/21/2010 19:29:00 | 26.0 4/3/2010 20:29:01 | 26.637 |
| 4/2/2010 22:51:01 | 25.672 4/21/2010 20:04:00 | 26.0 4/3/2010 20:49:01 | 26.637 |
| 4/2/2010 23:11:01 | 25.672 4/21/2010 20:39:00 | 26.0 4/3/2010 21:09:01 | 26.637 |
| 4/2/2010 23:31:01 | 25.672 4/21/2010 21:14:00 | 26.0 4/3/2010 21:29:01 | 26.637 |
| 4/2/2010 23:51:01 | 25.672 4/21/2010 21:49:00 | 26.0 4/3/2010 21:49:01 | 26.637 |
| 4/3/2010 00:11:01 | 25.672 4/21/2010 22:24:00 | 26.0 4/3/2010 22:09:01 | 26.637 |
| 4/3/2010 00:31:01 | 25.672 4/21/2010 22:59:00 | 26.0 4/3/2010 22:29:01 | 26.637 |
| 4/3/2010 00:51:01 | 25.672 4/21/2010 23:34:00 | 26.0 4/3/2010 22:49:01 | 26.637 |
| 4/3/2010 01:11:01 | 25.672 4/22/2010 00:09:00 | 26.0 4/3/2010 23:09:01 | 26.637 |
| 4/3/2010 01:31:01 | 25.672 4/22/2010 00:44:00 | 26.0 4/3/2010 23:29:01 | 26.637 |
| 4/3/2010 01:51:01 | 25.672 4/22/2010 01:19:00 | 26.0 4/3/2010 23:49:01 | 26.637 |
| 4/3/2010 02:11:01 | 25.672 4/22/2010 01:54:00 | 26.0 4/4/2010 00:09:01 | 26.699 |
| 4/3/2010 02:31:01 | 25.672 4/22/2010 02:29:00 | 26.0 4/4/2010 00:29:01 | 26.637 |
| 4/3/2010 02:51:01 | 25.672 4/22/2010 03:04:00 | 26.0 4/4/2010 00:49:01 | 26.699 |
| 4/3/2010 03:11:01 | 25.672 4/22/2010 03:39:00 | 26.0 4/4/2010 01:09:01 | 26.699 |
| 4/3/2010 03:31:01 | 25.672 4/22/2010 04:14:00 | 26.0 4/4/2010 01:29:01 | 26.699 |
| 4/3/2010 03:51:01 | 25.672 4/22/2010 04:49:00 | 26.0 4/4/2010 01:49:01 | 26.699 |
| 4/3/2010 04:11:01 | 25.672 4/22/2010 05:24:00 | 26.0 4/4/2010 02:09:01 | 26.699 |

|                   |        |                    |      |                   |        |
|-------------------|--------|--------------------|------|-------------------|--------|
| 4/3/2010 04:31:01 | 25.672 | 4/22/2010 05:59:00 | 26.0 | 4/4/2010 02:29:01 | 26.699 |
| 4/3/2010 04:51:01 | 25.672 | 4/22/2010 06:34:00 | 26.0 | 4/4/2010 02:49:01 | 26.699 |
| 4/3/2010 05:11:01 | 25.672 | 4/22/2010 07:09:00 | 25.5 | 4/4/2010 03:09:01 | 26.699 |
| 4/3/2010 05:31:01 | 25.672 | 4/22/2010 07:44:00 | 25.5 | 4/4/2010 03:29:01 | 26.699 |
| 4/3/2010 05:51:01 | 25.672 | 4/22/2010 08:19:00 | 25.5 | 4/4/2010 03:49:01 | 26.699 |
| 4/3/2010 06:11:01 | 25.672 | 4/22/2010 08:54:00 | 25.5 | 4/4/2010 04:09:01 | 26.699 |
| 4/3/2010 06:31:01 | 25.672 | 4/22/2010 09:29:00 | 25.5 | 4/4/2010 04:29:01 | 26.699 |
| 4/3/2010 06:51:01 | 25.672 | 4/22/2010 10:04:00 | 25.5 | 4/4/2010 04:49:01 | 26.699 |
| 4/3/2010 07:11:01 | 25.672 | 4/22/2010 10:39:00 | 25.5 | 4/4/2010 05:09:01 | 26.699 |
| 4/3/2010 07:31:01 | 25.672 | 4/22/2010 11:14:00 | 25.5 | 4/4/2010 05:29:01 | 26.699 |
| 4/3/2010 07:51:01 | 25.672 | 4/22/2010 11:49:00 | 25.5 | 4/4/2010 05:49:01 | 26.699 |
| 4/3/2010 08:11:01 | 25.672 | 4/22/2010 12:24:00 | 25.5 | 4/4/2010 06:09:01 | 26.699 |
| 4/3/2010 08:31:01 | 25.672 | 4/22/2010 12:59:00 | 25.5 | 4/4/2010 06:29:01 | 26.699 |
| 4/3/2010 08:51:01 | 25.672 | 4/22/2010 13:34:00 | 25.5 | 4/4/2010 06:49:01 | 26.699 |
| 4/3/2010 09:11:01 | 25.672 | 4/22/2010 14:09:00 | 25.5 | 4/4/2010 07:09:01 | 26.699 |
| 4/3/2010 09:31:01 | 25.672 | 4/22/2010 14:44:00 | 25.5 | 4/4/2010 07:29:01 | 26.699 |
| 4/3/2010 09:51:01 | 25.672 | 4/22/2010 15:19:00 | 26.0 | 4/4/2010 07:49:01 | 26.637 |
| 4/3/2010 10:11:01 | 25.672 | 4/22/2010 15:54:00 | 26.0 | 4/4/2010 08:09:01 | 26.637 |
| 4/3/2010 10:31:01 | 25.672 | 4/22/2010 16:29:00 | 26.0 | 4/4/2010 08:29:01 | 26.637 |
| 4/3/2010 10:51:01 | 25.672 | 4/22/2010 17:04:00 | 26.0 | 4/4/2010 08:49:01 | 26.637 |
| 4/3/2010 11:11:01 | 25.672 | 4/22/2010 17:39:00 | 26.0 | 4/4/2010 09:09:01 | 26.637 |
| 4/3/2010 11:31:01 | 25.672 | 4/22/2010 18:14:00 | 26.0 | 4/4/2010 09:29:01 | 26.637 |
| 4/3/2010 11:51:01 | 25.672 | 4/22/2010 18:49:00 | 26.0 | 4/4/2010 09:49:01 | 26.637 |
| 4/3/2010 12:11:01 | 25.672 | 4/22/2010 19:24:00 | 26.0 | 4/4/2010 10:09:01 | 26.637 |
| 4/3/2010 12:31:01 | 25.672 | 4/22/2010 19:59:00 | 26.0 | 4/4/2010 10:29:01 | 26.637 |
| 4/3/2010 12:51:01 | 25.672 | 4/22/2010 20:34:00 | 26.0 | 4/4/2010 10:49:01 | 26.637 |
| 4/3/2010 13:11:01 | 25.609 | 4/22/2010 21:09:00 | 26.0 | 4/4/2010 11:09:01 | 26.637 |
| 4/3/2010 13:31:01 | 25.609 | 4/22/2010 21:44:00 | 26.0 | 4/4/2010 11:29:01 | 26.637 |
| 4/3/2010 13:51:01 | 25.609 | 4/22/2010 22:19:00 | 26.0 | 4/4/2010 11:49:01 | 26.637 |
| 4/3/2010 14:11:01 | 25.609 | 4/22/2010 22:54:00 | 26.0 | 4/4/2010 12:09:01 | 26.637 |
| 4/3/2010 14:31:01 | 25.609 | 4/22/2010 23:29:00 | 26.0 | 4/4/2010 12:29:01 | 26.574 |
| 4/3/2010 14:51:01 | 25.609 | 4/23/2010 00:04:00 | 26.0 | 4/4/2010 12:49:01 | 26.574 |
| 4/3/2010 15:11:01 | 25.609 | 4/23/2010 00:39:00 | 26.0 | 4/4/2010 13:09:01 | 26.574 |
| 4/3/2010 15:31:01 | 25.609 | 4/23/2010 01:14:00 | 26.0 | 4/4/2010 13:29:01 | 26.574 |
| 4/3/2010 15:51:01 | 25.609 | 4/23/2010 01:49:00 | 26.0 | 4/4/2010 13:49:01 | 26.574 |
| 4/3/2010 16:11:01 | 25.609 | 4/23/2010 02:24:00 | 26.0 | 4/4/2010 14:09:01 | 26.574 |
| 4/3/2010 16:31:01 | 25.609 | 4/23/2010 02:59:00 | 26.0 | 4/4/2010 14:29:01 | 26.574 |
| 4/3/2010 16:51:01 | 25.609 | 4/23/2010 03:34:00 | 26.0 | 4/4/2010 14:49:01 | 26.574 |
| 4/3/2010 17:11:01 | 25.609 | 4/23/2010 04:09:00 | 26.0 | 4/4/2010 15:09:01 | 26.574 |
| 4/3/2010 17:31:01 | 25.609 | 4/23/2010 04:44:00 | 26.0 | 4/4/2010 15:29:01 | 26.574 |
| 4/3/2010 17:51:01 | 25.609 | 4/23/2010 05:19:00 | 26.0 | 4/4/2010 15:49:01 | 26.574 |
| 4/3/2010 18:11:01 | 25.609 | 4/23/2010 05:54:00 | 26.0 | 4/4/2010 16:09:01 | 26.574 |
| 4/3/2010 18:31:01 | 25.609 | 4/23/2010 06:29:00 | 26.0 | 4/4/2010 16:29:01 | 26.574 |
| 4/3/2010 18:51:01 | 25.609 | 4/23/2010 07:04:00 | 25.5 | 4/4/2010 16:49:01 | 26.574 |
| 4/3/2010 19:11:01 | 25.609 | 4/23/2010 07:39:00 | 26.0 | 4/4/2010 17:09:01 | 26.574 |
| 4/3/2010 19:31:01 | 25.672 | 4/23/2010 08:14:00 | 25.5 | 4/4/2010 17:29:01 | 26.574 |
| 4/3/2010 19:51:01 | 25.672 | 4/23/2010 08:49:00 | 25.5 | 4/4/2010 17:49:01 | 26.574 |
| 4/3/2010 20:11:01 | 25.609 | 4/23/2010 09:24:00 | 25.5 | 4/4/2010 18:09:01 | 26.512 |
| 4/3/2010 20:31:01 | 25.672 | 4/23/2010 09:59:00 | 25.5 | 4/4/2010 18:29:01 | 26.574 |
| 4/3/2010 20:51:01 | 25.672 | 4/23/2010 10:34:00 | 25.5 | 4/4/2010 18:49:01 | 26.512 |

|                   |        |                    |      |                   |        |
|-------------------|--------|--------------------|------|-------------------|--------|
| 4/3/2010 21:11:01 | 25.672 | 4/23/2010 11:09:00 | 25.5 | 4/4/2010 19:09:01 | 26.574 |
| 4/3/2010 21:31:01 | 25.672 | 4/23/2010 11:44:00 | 25.5 | 4/4/2010 19:29:01 | 26.574 |
| 4/3/2010 21:51:01 | 25.672 | 4/23/2010 12:19:00 | 25.5 | 4/4/2010 19:49:01 | 26.512 |
| 4/3/2010 22:11:01 | 25.672 | 4/23/2010 12:54:00 | 26.0 | 4/4/2010 20:09:01 | 26.574 |
| 4/3/2010 22:31:01 | 25.672 | 4/23/2010 13:29:00 | 26.0 | 4/4/2010 20:29:01 | 26.574 |
| 4/3/2010 22:51:01 | 25.672 | 4/23/2010 14:04:00 | 26.0 | 4/4/2010 20:49:01 | 26.574 |
| 4/3/2010 23:11:01 | 25.672 | 4/23/2010 14:39:00 | 26.0 | 4/4/2010 21:09:01 | 26.574 |
| 4/3/2010 23:31:01 | 25.672 | 4/23/2010 15:14:00 | 26.0 | 4/4/2010 21:29:01 | 26.574 |
| 4/3/2010 23:51:01 | 25.672 | 4/23/2010 15:49:00 | 26.0 | 4/4/2010 21:49:01 | 26.574 |
| 4/4/2010 00:11:01 | 25.672 | 4/23/2010 16:24:00 | 26.0 | 4/4/2010 22:09:01 | 26.574 |
| 4/4/2010 00:31:01 | 25.672 | 4/23/2010 16:59:00 | 26.0 | 4/4/2010 22:29:01 | 26.574 |
| 4/4/2010 00:51:01 | 25.672 | 4/23/2010 17:34:00 | 26.0 | 4/4/2010 22:49:01 | 26.574 |
| 4/4/2010 01:11:01 | 25.672 | 4/23/2010 18:09:00 | 26.0 | 4/4/2010 23:09:01 | 26.574 |
| 4/4/2010 01:31:01 | 25.734 | 4/23/2010 18:44:00 | 26.5 | 4/4/2010 23:29:01 | 26.574 |
| 4/4/2010 01:51:01 | 25.734 | 4/23/2010 19:19:00 | 26.5 | 4/4/2010 23:49:01 | 26.574 |
| 4/4/2010 02:11:01 | 25.734 | 4/23/2010 19:54:00 | 26.5 | 4/5/2010 00:09:01 | 26.574 |
| 4/4/2010 02:31:01 | 25.734 | 4/23/2010 20:29:00 | 26.5 | 4/5/2010 00:29:01 | 26.574 |
| 4/4/2010 02:51:01 | 25.734 | 4/23/2010 21:04:00 | 26.5 | 4/5/2010 00:49:01 | 26.574 |
| 4/4/2010 03:11:01 | 25.734 | 4/23/2010 21:39:00 | 26.5 | 4/5/2010 01:09:01 | 26.574 |
| 4/4/2010 03:31:01 | 25.734 | 4/23/2010 22:14:00 | 26.5 | 4/5/2010 01:29:01 | 26.574 |
| 4/4/2010 03:51:01 | 25.734 | 4/23/2010 22:49:00 | 26.5 | 4/5/2010 01:49:01 | 26.574 |
| 4/4/2010 04:11:01 | 25.734 | 4/23/2010 23:24:00 | 26.5 | 4/5/2010 02:09:01 | 26.574 |
| 4/4/2010 04:31:01 | 25.734 | 4/23/2010 23:59:00 | 26.5 | 4/5/2010 02:29:01 | 26.574 |
| 4/4/2010 04:51:01 | 25.734 | 4/24/2010 00:34:00 | 26.5 | 4/5/2010 02:49:01 | 26.574 |
| 4/4/2010 05:11:01 | 25.734 | 4/24/2010 01:09:00 | 26.5 | 4/5/2010 03:09:01 | 26.574 |
| 4/4/2010 05:31:01 | 25.734 | 4/24/2010 01:44:00 | 26.5 | 4/5/2010 03:29:01 | 26.574 |
| 4/4/2010 05:51:01 | 25.734 | 4/24/2010 02:19:00 | 26.0 | 4/5/2010 03:49:01 | 26.574 |
| 4/4/2010 06:11:01 | 25.734 | 4/24/2010 02:54:00 | 26.0 | 4/5/2010 04:09:01 | 26.574 |
| 4/4/2010 06:31:01 | 25.734 | 4/24/2010 03:29:00 | 26.0 | 4/5/2010 04:29:01 | 26.574 |
| 4/4/2010 06:51:01 | 25.734 | 4/24/2010 04:04:00 | 26.0 | 4/5/2010 04:49:01 | 26.574 |
| 4/4/2010 07:11:01 | 25.734 | 4/24/2010 04:39:00 | 26.0 | 4/5/2010 05:09:01 | 26.574 |
| 4/4/2010 07:31:01 | 25.734 | 4/24/2010 05:14:00 | 26.0 | 4/5/2010 05:29:01 | 26.574 |
| 4/4/2010 07:51:01 | 25.734 | 4/24/2010 05:49:00 | 26.0 | 4/5/2010 05:49:01 | 26.574 |
| 4/4/2010 08:11:01 | 25.734 | 4/24/2010 06:24:00 | 26.0 | 4/5/2010 06:09:01 | 26.574 |
| 4/4/2010 08:31:01 | 25.734 | 4/24/2010 06:59:00 | 26.0 | 4/5/2010 06:29:01 | 26.574 |
| 4/4/2010 08:51:01 | 25.734 | 4/24/2010 07:34:00 | 26.0 | 4/5/2010 06:49:01 | 26.574 |
| 4/4/2010 09:11:01 | 25.672 | 4/24/2010 08:09:00 | 26.0 | 4/5/2010 07:09:01 | 26.574 |
| 4/4/2010 09:31:01 | 25.672 | 4/24/2010 08:44:00 | 26.0 | 4/5/2010 07:29:01 | 26.574 |
| 4/4/2010 09:51:01 | 25.672 | 4/24/2010 09:19:00 | 26.0 | 4/5/2010 07:49:01 | 26.574 |
| 4/4/2010 10:11:01 | 25.672 | 4/24/2010 09:54:00 | 26.0 | 4/5/2010 08:09:01 | 26.574 |
| 4/4/2010 10:31:01 | 25.672 | 4/24/2010 10:29:00 | 26.0 | 4/5/2010 08:29:01 | 26.574 |
| 4/4/2010 10:51:01 | 25.672 | 4/24/2010 11:04:00 | 26.0 | 4/5/2010 08:49:01 | 26.574 |
| 4/4/2010 11:11:01 | 25.672 | 4/24/2010 11:39:00 | 26.0 | 4/5/2010 09:09:01 | 26.574 |
| 4/4/2010 11:31:01 | 25.672 | 4/24/2010 12:14:00 | 26.0 | 4/5/2010 09:29:01 | 26.574 |
| 4/4/2010 11:51:01 | 25.672 | 4/24/2010 12:49:00 | 26.0 | 4/5/2010 09:49:01 | 26.512 |
| 4/4/2010 12:11:01 | 25.672 | 4/24/2010 13:24:00 | 26.0 | 4/5/2010 10:09:01 | 26.512 |
| 4/4/2010 12:31:01 | 25.672 | 4/24/2010 13:59:00 | 26.0 | 4/5/2010 10:29:01 | 26.512 |
| 4/4/2010 12:51:01 | 25.672 | 4/24/2010 14:34:00 | 26.0 | 4/5/2010 10:49:01 | 26.512 |
| 4/4/2010 13:11:01 | 25.672 | 4/24/2010 15:09:00 | 26.0 | 4/5/2010 11:09:01 | 26.512 |
| 4/4/2010 13:31:01 | 25.672 | 4/24/2010 15:44:00 | 26.0 | 4/5/2010 11:29:01 | 26.512 |

|                   |        |                    |      |                   |        |
|-------------------|--------|--------------------|------|-------------------|--------|
| 4/4/2010 13:51:01 | 25.672 | 4/24/2010 16:19:00 | 26.0 | 4/5/2010 11:49:01 | 26.512 |
| 4/4/2010 14:11:01 | 25.672 | 4/24/2010 16:54:00 | 26.0 | 4/5/2010 12:09:01 | 26.512 |
| 4/4/2010 14:31:01 | 25.609 | 4/24/2010 17:29:00 | 26.5 | 4/5/2010 12:29:01 | 26.512 |
| 4/4/2010 14:51:01 | 25.609 | 4/24/2010 18:04:00 | 26.5 | 4/5/2010 12:49:01 | 26.512 |
| 4/4/2010 15:11:01 | 25.609 | 4/24/2010 18:39:00 | 26.5 | 4/5/2010 13:09:01 | 26.512 |
| 4/4/2010 15:31:01 | 25.609 | 4/24/2010 19:14:00 | 26.5 | 4/5/2010 13:29:01 | 26.512 |
| 4/4/2010 15:51:01 | 25.609 | 4/24/2010 19:49:00 | 26.5 | 4/5/2010 13:49:01 | 26.512 |
| 4/4/2010 16:11:01 | 25.609 | 4/24/2010 20:24:00 | 26.5 | 4/5/2010 14:09:01 | 26.512 |
| 4/4/2010 16:31:01 | 25.609 | 4/24/2010 20:59:00 | 26.5 | 4/5/2010 14:29:01 | 26.449 |
| 4/4/2010 16:51:01 | 25.609 | 4/24/2010 21:34:00 | 26.5 | 4/5/2010 14:49:01 | 26.449 |
| 4/4/2010 17:11:01 | 25.609 | 4/24/2010 22:09:00 | 26.5 | 4/5/2010 15:09:01 | 26.449 |
| 4/4/2010 17:31:01 | 25.609 | 4/24/2010 22:44:00 | 26.5 | 4/5/2010 15:29:01 | 26.449 |
| 4/4/2010 17:51:01 | 25.609 | 4/24/2010 23:19:00 | 26.5 | 4/5/2010 15:49:01 | 26.449 |
| 4/4/2010 18:11:01 | 25.609 | 4/24/2010 23:54:00 | 26.5 | 4/5/2010 16:09:01 | 26.449 |
| 4/4/2010 18:31:01 | 25.609 | 4/25/2010 00:29:00 | 26.5 | 4/5/2010 16:29:01 | 26.449 |
| 4/4/2010 18:51:01 | 25.609 | 4/25/2010 01:04:00 | 26.0 | 4/5/2010 16:49:01 | 26.449 |
| 4/4/2010 19:11:01 | 25.609 | 4/25/2010 01:39:00 | 26.0 | 4/5/2010 17:09:01 | 26.449 |
| 4/4/2010 19:31:01 | 25.609 | 4/25/2010 02:14:00 | 26.0 | 4/5/2010 17:29:01 | 26.449 |
| 4/4/2010 19:51:01 | 25.609 | 4/25/2010 02:49:00 | 26.0 | 4/5/2010 17:49:01 | 26.449 |
| 4/4/2010 20:11:01 | 25.609 | 4/25/2010 03:24:00 | 26.0 | 4/5/2010 18:09:01 | 26.449 |
| 4/4/2010 20:31:01 | 25.672 | 4/25/2010 03:59:00 | 26.0 | 4/5/2010 18:29:01 | 26.449 |
| 4/4/2010 20:51:01 | 25.672 | 4/25/2010 04:34:00 | 26.0 | 4/5/2010 18:49:01 | 26.449 |
| 4/4/2010 21:11:01 | 25.672 | 4/25/2010 05:09:00 | 26.0 | 4/5/2010 19:09:01 | 26.449 |
| 4/4/2010 21:31:01 | 25.672 | 4/25/2010 05:44:00 | 26.0 | 4/5/2010 19:29:01 | 26.449 |
| 4/4/2010 21:51:01 | 25.672 | 4/25/2010 06:19:00 | 26.0 | 4/5/2010 19:49:01 | 26.449 |
| 4/4/2010 22:11:01 | 25.672 | 4/25/2010 06:54:00 | 26.0 | 4/5/2010 20:09:01 | 26.449 |
| 4/4/2010 22:31:01 | 25.672 | 4/25/2010 07:29:00 | 26.0 | 4/5/2010 20:29:01 | 26.449 |
| 4/4/2010 22:51:01 | 25.672 | 4/25/2010 08:04:00 | 26.0 | 4/5/2010 20:49:01 | 26.449 |
| 4/4/2010 23:11:01 | 25.672 | 4/25/2010 08:39:00 | 26.0 | 4/5/2010 21:09:01 | 26.512 |
| 4/4/2010 23:31:01 | 25.672 | 4/25/2010 09:14:00 | 26.0 | 4/5/2010 21:29:01 | 26.512 |
| 4/4/2010 23:51:01 | 25.672 | 4/25/2010 09:49:00 | 26.0 | 4/5/2010 21:49:01 | 26.512 |
| 4/5/2010 00:11:01 | 25.672 | 4/25/2010 10:24:00 | 26.0 | 4/5/2010 22:09:01 | 26.512 |
| 4/5/2010 00:31:01 | 25.672 | 4/25/2010 10:59:00 | 25.5 | 4/5/2010 22:29:01 | 26.512 |
| 4/5/2010 00:51:01 | 25.672 | 4/25/2010 11:34:00 | 25.5 | 4/5/2010 22:49:01 | 26.512 |
| 4/5/2010 01:11:01 | 25.672 | 4/25/2010 12:09:00 | 25.5 | 4/5/2010 23:09:01 | 26.512 |
| 4/5/2010 01:31:01 | 25.672 | 4/25/2010 12:44:00 | 26.0 | 4/5/2010 23:29:01 | 26.512 |
| 4/5/2010 01:51:01 | 25.672 | 4/25/2010 13:19:00 | 25.5 | 4/5/2010 23:49:01 | 26.512 |
| 4/5/2010 02:11:01 | 25.672 | 4/25/2010 13:54:00 | 26.0 | 4/6/2010 00:09:01 | 26.512 |
| 4/5/2010 02:31:01 | 25.672 | 4/25/2010 14:29:00 | 26.0 | 4/6/2010 00:29:01 | 26.512 |
| 4/5/2010 02:51:01 | 25.672 | 4/25/2010 15:04:00 | 26.0 | 4/6/2010 00:49:01 | 26.512 |
| 4/5/2010 03:11:01 | 25.672 | 4/25/2010 15:39:00 | 26.0 | 4/6/2010 01:09:01 | 26.512 |
| 4/5/2010 03:31:01 | 25.672 | 4/25/2010 16:14:00 | 26.0 | 4/6/2010 01:29:01 | 26.512 |
| 4/5/2010 03:51:01 | 25.672 | 4/25/2010 16:49:00 | 26.0 | 4/6/2010 01:49:01 | 26.512 |
| 4/5/2010 04:11:01 | 25.672 | 4/25/2010 17:24:00 | 26.0 | 4/6/2010 02:09:01 | 26.512 |
| 4/5/2010 04:31:01 | 25.672 | 4/25/2010 17:59:00 | 26.0 | 4/6/2010 02:29:01 | 26.512 |
| 4/5/2010 04:51:01 | 25.672 | 4/25/2010 18:34:00 | 26.0 | 4/6/2010 02:49:01 | 26.574 |
| 4/5/2010 05:11:01 | 25.672 | 4/25/2010 19:09:00 | 26.0 | 4/6/2010 03:09:01 | 26.574 |
| 4/5/2010 05:31:01 | 25.672 | 4/25/2010 19:44:00 | 26.0 | 4/6/2010 03:29:01 | 26.574 |
| 4/5/2010 05:51:01 | 25.672 | 4/25/2010 20:19:00 | 26.0 | 4/6/2010 03:49:01 | 26.574 |
| 4/5/2010 06:11:01 | 25.672 | 4/25/2010 20:54:00 | 26.0 | 4/6/2010 04:09:01 | 26.574 |

|                   |        |                    |      |                   |        |
|-------------------|--------|--------------------|------|-------------------|--------|
| 4/5/2010 06:31:01 | 25.672 | 4/25/2010 21:29:00 | 26.0 | 4/6/2010 04:29:01 | 26.574 |
| 4/5/2010 06:51:01 | 25.672 | 4/25/2010 22:04:00 | 26.0 | 4/6/2010 04:49:01 | 26.574 |
| 4/5/2010 07:11:01 | 25.672 | 4/25/2010 22:39:00 | 26.0 | 4/6/2010 05:09:01 | 26.574 |
| 4/5/2010 07:31:01 | 25.672 | 4/25/2010 23:14:00 | 26.0 | 4/6/2010 05:29:01 | 26.574 |
| 4/5/2010 07:51:01 | 25.672 | 4/25/2010 23:49:00 | 26.0 | 4/6/2010 05:49:01 | 26.574 |
| 4/5/2010 08:11:01 | 25.672 | 4/26/2010 00:24:00 | 26.0 | 4/6/2010 06:09:01 | 26.574 |
| 4/5/2010 08:31:01 | 25.672 | 4/26/2010 00:59:00 | 26.0 | 4/6/2010 06:29:01 | 26.574 |
| 4/5/2010 08:51:01 | 25.672 | 4/26/2010 01:34:00 | 26.0 | 4/6/2010 06:49:01 | 26.574 |
| 4/5/2010 09:11:01 | 25.672 | 4/26/2010 02:09:00 | 26.0 | 4/6/2010 07:09:01 | 26.574 |
| 4/5/2010 09:31:01 | 25.609 | 4/26/2010 02:44:00 | 26.0 | 4/6/2010 07:29:01 | 26.574 |
| 4/5/2010 09:51:01 | 25.609 | 4/26/2010 03:19:00 | 26.0 | 4/6/2010 07:49:01 | 26.574 |
| 4/5/2010 10:11:01 | 25.609 | 4/26/2010 03:54:00 | 25.5 | 4/6/2010 08:09:01 | 26.574 |
| 4/5/2010 10:31:01 | 25.609 | 4/26/2010 04:29:00 | 25.5 | 4/6/2010 08:29:01 | 26.574 |
| 4/5/2010 10:51:01 | 25.609 | 4/26/2010 05:04:00 | 25.5 | 4/6/2010 08:49:01 | 26.574 |
| 4/5/2010 11:11:01 | 25.609 | 4/26/2010 05:39:00 | 25.5 | 4/6/2010 09:09:01 | 26.512 |
| 4/5/2010 11:31:01 | 25.609 | 4/26/2010 06:14:00 | 25.5 | 4/6/2010 09:29:01 | 26.574 |
| 4/5/2010 11:51:01 | 25.609 | 4/26/2010 06:49:00 | 25.5 | 4/6/2010 09:49:01 | 26.512 |
| 4/5/2010 12:11:01 | 25.609 | 4/26/2010 07:24:00 | 25.5 | 4/6/2010 10:09:01 | 26.512 |
| 4/5/2010 12:31:01 | 25.609 | 4/26/2010 07:59:00 | 25.5 | 4/6/2010 10:29:01 | 26.512 |
| 4/5/2010 12:51:01 | 25.609 | 4/26/2010 08:34:00 | 25.5 | 4/6/2010 10:49:01 | 26.512 |
| 4/5/2010 13:11:01 | 25.609 | 4/26/2010 09:09:00 | 25.5 | 4/6/2010 11:09:01 | 26.512 |
| 4/5/2010 13:31:01 | 25.547 | 4/26/2010 09:44:00 | 25.5 | 4/6/2010 11:29:01 | 26.512 |
| 4/5/2010 13:51:01 | 25.547 | 4/26/2010 10:19:00 | 25.5 | 4/6/2010 11:49:01 | 26.512 |
| 4/5/2010 14:11:01 | 25.547 | 4/26/2010 10:54:00 | 25.5 | 4/6/2010 12:09:01 | 26.512 |
| 4/5/2010 14:31:01 | 25.547 | 4/26/2010 11:29:00 | 25.5 | 4/6/2010 12:29:01 | 26.512 |
| 4/5/2010 14:51:01 | 25.547 | 4/26/2010 12:04:00 | 25.5 | 4/6/2010 12:49:01 | 26.512 |
| 4/5/2010 15:11:01 | 25.547 | 4/26/2010 12:39:00 | 25.5 | 4/6/2010 13:09:01 | 26.512 |
| 4/5/2010 15:31:01 | 25.547 | 4/26/2010 13:14:00 | 25.5 | 4/6/2010 13:29:01 | 26.512 |
| 4/5/2010 15:51:01 | 25.547 | 4/26/2010 13:49:00 | 25.5 | 4/6/2010 13:49:01 | 26.512 |
| 4/5/2010 16:11:01 | 25.547 | 4/26/2010 14:24:00 | 25.5 | 4/6/2010 14:09:01 | 26.512 |
| 4/5/2010 16:31:01 | 25.547 | 4/26/2010 14:59:00 | 25.5 | 4/6/2010 14:29:01 | 26.449 |
| 4/5/2010 16:51:01 | 25.547 | 4/26/2010 15:34:00 | 25.5 | 4/6/2010 14:49:01 | 26.449 |
| 4/5/2010 17:11:01 | 25.547 | 4/26/2010 16:09:00 | 25.5 | 4/6/2010 15:09:01 | 26.449 |
| 4/5/2010 17:31:01 | 25.547 | 4/26/2010 16:44:00 | 25.5 | 4/6/2010 15:29:01 | 26.449 |
| 4/5/2010 17:51:01 | 25.547 | 4/26/2010 17:19:00 | 25.5 | 4/6/2010 15:49:01 | 26.449 |
| 4/5/2010 18:11:01 | 25.547 | 4/26/2010 17:54:00 | 25.5 | 4/6/2010 16:09:01 | 26.449 |
| 4/5/2010 18:31:01 | 25.547 | 4/26/2010 18:29:00 | 26.0 | 4/6/2010 16:29:01 | 26.449 |
| 4/5/2010 18:51:01 | 25.547 | 4/26/2010 19:04:00 | 26.0 | 4/6/2010 16:49:01 | 26.449 |
| 4/5/2010 19:11:01 | 25.547 | 4/26/2010 19:39:00 | 26.0 | 4/6/2010 17:09:01 | 26.449 |
| 4/5/2010 19:31:01 | 25.547 | 4/26/2010 20:14:00 | 26.0 | 4/6/2010 17:29:01 | 26.449 |
| 4/5/2010 19:51:01 | 25.547 | 4/26/2010 20:49:00 | 26.0 | 4/6/2010 17:49:01 | 26.449 |
| 4/5/2010 20:11:01 | 25.547 | 4/26/2010 21:24:00 | 26.0 | 4/6/2010 18:09:01 | 26.449 |
| 4/5/2010 20:31:01 | 25.547 | 4/26/2010 21:59:00 | 26.0 | 4/6/2010 18:29:01 | 26.449 |
| 4/5/2010 20:51:01 | 25.547 | 4/26/2010 22:34:00 | 26.0 | 4/6/2010 18:49:01 | 26.449 |
| 4/5/2010 21:11:01 | 25.547 | 4/26/2010 23:09:00 | 26.0 | 4/6/2010 19:09:01 | 26.449 |
| 4/5/2010 21:31:01 | 25.547 | 4/26/2010 23:44:00 | 26.0 | 4/6/2010 19:29:01 | 26.449 |
| 4/5/2010 21:51:01 | 25.547 | 4/27/2010 00:19:00 | 26.0 | 4/6/2010 19:49:01 | 26.449 |
| 4/5/2010 22:11:01 | 25.609 | 4/27/2010 00:54:00 | 26.0 | 4/6/2010 20:09:01 | 26.449 |
| 4/5/2010 22:31:01 | 25.609 | 4/27/2010 01:29:00 | 26.0 | 4/6/2010 20:29:01 | 26.449 |
| 4/5/2010 22:51:01 | 25.609 | 4/27/2010 02:04:00 | 25.5 | 4/6/2010 20:49:01 | 26.449 |

|                   |        |                    |      |                   |        |
|-------------------|--------|--------------------|------|-------------------|--------|
| 4/5/2010 23:11:01 | 25.609 | 4/27/2010 02:39:00 | 25.5 | 4/6/2010 21:09:01 | 26.449 |
| 4/5/2010 23:31:01 | 25.609 | 4/27/2010 03:14:00 | 25.5 | 4/6/2010 21:29:01 | 26.449 |
| 4/5/2010 23:51:01 | 25.609 | 4/27/2010 03:49:00 | 25.5 | 4/6/2010 21:49:01 | 26.449 |
| 4/6/2010 00:11:01 | 25.609 | 4/27/2010 04:24:00 | 25.5 | 4/6/2010 22:09:01 | 26.449 |
| 4/6/2010 00:31:01 | 25.609 | 4/27/2010 04:59:00 | 25.5 | 4/6/2010 22:29:01 | 26.449 |
| 4/6/2010 00:51:01 | 25.609 | 4/27/2010 05:34:00 | 25.5 | 4/6/2010 22:49:01 | 26.449 |
| 4/6/2010 01:11:01 | 25.609 | 4/27/2010 06:09:00 | 25.5 | 4/6/2010 23:09:01 | 26.449 |
| 4/6/2010 01:31:01 | 25.609 | 4/27/2010 06:44:00 | 25.5 | 4/6/2010 23:29:01 | 26.449 |
| 4/6/2010 01:51:01 | 25.609 | 4/27/2010 07:19:00 | 25.5 | 4/6/2010 23:49:01 | 26.449 |
| 4/6/2010 02:11:01 | 25.609 | 4/27/2010 07:54:00 | 25.5 | 4/7/2010 00:09:01 | 26.512 |
| 4/6/2010 02:31:01 | 25.609 | 4/27/2010 08:29:00 | 25.5 | 4/7/2010 00:29:01 | 26.512 |
| 4/6/2010 02:51:01 | 25.609 | 4/27/2010 09:04:00 | 25.5 | 4/7/2010 00:49:01 | 26.512 |
| 4/6/2010 03:11:01 | 25.609 | 4/27/2010 09:39:00 | 25.5 | 4/7/2010 01:09:01 | 26.512 |
| 4/6/2010 03:31:01 | 25.609 | 4/27/2010 10:14:00 | 25.0 | 4/7/2010 01:29:01 | 26.512 |
| 4/6/2010 03:51:01 | 25.609 | 4/27/2010 10:49:00 | 25.0 | 4/7/2010 01:49:01 | 26.512 |
| 4/6/2010 04:11:01 | 25.609 | 4/27/2010 11:24:00 | 25.0 | 4/7/2010 02:09:01 | 26.512 |
| 4/6/2010 04:31:01 | 25.609 | 4/27/2010 11:59:00 | 25.5 | 4/7/2010 02:29:01 | 26.512 |
| 4/6/2010 04:51:01 | 25.609 | 4/27/2010 12:34:00 | 25.5 | 4/7/2010 02:49:01 | 26.512 |
| 4/6/2010 05:11:01 | 25.609 | 4/27/2010 13:09:00 | 25.5 | 4/7/2010 03:09:01 | 26.512 |
| 4/6/2010 05:31:01 | 25.609 | 4/27/2010 13:44:00 | 25.5 | 4/7/2010 03:29:01 | 26.512 |
| 4/6/2010 05:51:01 | 25.609 | 4/27/2010 14:19:00 | 25.5 | 4/7/2010 03:49:01 | 26.512 |
| 4/6/2010 06:11:01 | 25.609 | 4/27/2010 14:54:00 | 25.5 | 4/7/2010 04:09:01 | 26.512 |
| 4/6/2010 06:31:01 | 25.609 | 4/27/2010 15:29:00 | 25.5 | 4/7/2010 04:29:01 | 26.512 |
| 4/6/2010 06:51:01 | 25.609 | 4/27/2010 16:04:00 | 25.5 | 4/7/2010 04:49:01 | 26.512 |
| 4/6/2010 07:11:01 | 25.609 | 4/27/2010 16:39:00 | 25.5 | 4/7/2010 05:09:01 | 26.512 |
| 4/6/2010 07:31:01 | 25.609 | 4/27/2010 17:14:00 | 25.5 | 4/7/2010 05:29:01 | 26.512 |
| 4/6/2010 07:51:01 | 25.609 | 4/27/2010 17:49:00 | 25.5 | 4/7/2010 05:49:01 | 26.512 |
| 4/6/2010 08:11:01 | 25.609 | 4/27/2010 18:24:00 | 25.5 | 4/7/2010 06:09:01 | 26.512 |
| 4/6/2010 08:31:01 | 25.609 | 4/27/2010 18:59:00 | 26.0 | 4/7/2010 06:29:01 | 26.512 |
| 4/6/2010 08:51:01 | 25.609 | 4/27/2010 19:34:00 | 26.0 | 4/7/2010 06:49:01 | 26.574 |
| 4/6/2010 09:11:01 | 25.547 | 4/27/2010 20:09:00 | 26.0 | 4/7/2010 07:09:01 | 26.574 |
| 4/6/2010 09:31:01 | 25.547 | 4/27/2010 20:44:00 | 26.0 | 4/7/2010 07:29:01 | 26.574 |
| 4/6/2010 09:51:01 | 25.547 | 4/27/2010 21:19:00 | 26.0 | 4/7/2010 07:49:01 | 26.574 |
| 4/6/2010 10:11:01 | 25.547 | 4/27/2010 21:54:00 | 26.0 | 4/7/2010 08:09:01 | 26.574 |
| 4/6/2010 10:31:01 | 25.547 | 4/27/2010 22:29:00 | 26.0 | 4/7/2010 08:29:01 | 26.574 |
| 4/6/2010 10:51:01 | 25.547 | 4/27/2010 23:04:00 | 26.0 | 4/7/2010 08:49:01 | 26.574 |
| 4/6/2010 11:11:01 | 25.547 | 4/27/2010 23:39:00 | 26.0 | 4/7/2010 09:09:01 | 26.512 |
| 4/6/2010 11:31:01 | 25.547 | 4/28/2010 00:14:00 | 26.0 | 4/7/2010 09:29:01 | 26.512 |
| 4/6/2010 11:51:01 | 25.547 | 4/28/2010 00:49:00 | 26.0 | 4/7/2010 09:49:01 | 26.574 |
| 4/6/2010 12:11:01 | 25.547 | 4/28/2010 01:24:00 | 26.0 | 4/7/2010 10:09:01 | 26.574 |
| 4/6/2010 12:31:01 | 25.484 | 4/28/2010 01:59:00 | 26.0 | 4/7/2010 10:29:01 | 26.512 |
| 4/6/2010 12:51:01 | 25.484 | 4/28/2010 02:34:00 | 26.0 | 4/7/2010 10:49:01 | 26.512 |
| 4/6/2010 13:11:01 | 25.484 | 4/28/2010 03:09:00 | 25.5 | 4/7/2010 11:09:01 | 26.574 |
| 4/6/2010 13:31:01 | 25.484 | 4/28/2010 03:44:00 | 25.5 | 4/7/2010 11:29:01 | 26.512 |
| 4/6/2010 13:51:01 | 25.484 | 4/28/2010 04:19:00 | 25.5 | 4/7/2010 11:49:01 | 26.512 |
| 4/6/2010 14:11:01 | 25.484 | 4/28/2010 04:54:00 | 25.5 | 4/7/2010 12:09:01 | 26.512 |
| 4/6/2010 14:31:01 | 25.484 | 4/28/2010 05:29:00 | 25.5 | 4/7/2010 12:29:01 | 26.512 |
| 4/6/2010 14:51:01 | 25.484 | 4/28/2010 06:04:00 | 25.5 | 4/7/2010 12:49:01 | 26.512 |
| 4/6/2010 15:11:01 | 25.484 | 4/28/2010 06:39:00 | 25.5 | 4/7/2010 13:09:01 | 26.512 |
| 4/6/2010 15:31:01 | 25.422 | 4/28/2010 07:14:00 | 25.5 | 4/7/2010 13:29:01 | 26.512 |

|                   |        |                    |      |                   |        |
|-------------------|--------|--------------------|------|-------------------|--------|
| 4/6/2010 15:51:01 | 25.422 | 4/28/2010 07:49:00 | 25.5 | 4/7/2010 13:49:01 | 26.512 |
| 4/6/2010 16:11:01 | 25.422 | 4/28/2010 08:24:00 | 25.5 | 4/7/2010 14:09:01 | 26.512 |
| 4/6/2010 16:31:01 | 25.422 | 4/28/2010 08:59:00 | 25.5 | 4/7/2010 14:29:01 | 26.512 |
| 4/6/2010 16:51:01 | 25.422 | 4/28/2010 09:34:00 | 25.5 | 4/7/2010 14:49:01 | 26.512 |
| 4/6/2010 17:11:01 | 25.422 | 4/28/2010 10:09:00 | 25.5 | 4/7/2010 15:09:01 | 26.512 |
| 4/6/2010 17:31:01 | 25.422 | 4/28/2010 10:44:00 | 25.5 | 4/7/2010 15:29:01 | 26.512 |
| 4/6/2010 17:51:01 | 25.422 | 4/28/2010 11:19:00 | 25.5 | 4/7/2010 15:49:01 | 26.512 |
| 4/6/2010 18:11:01 | 25.422 | 4/28/2010 11:54:00 | 25.5 | 4/7/2010 16:09:01 | 26.512 |
| 4/6/2010 18:31:01 | 25.422 | 4/28/2010 12:29:00 | 25.5 | 4/7/2010 16:29:01 | 26.512 |
| 4/6/2010 18:51:01 | 25.422 | 4/28/2010 13:04:00 | 25.5 | 4/7/2010 16:49:01 | 26.512 |
| 4/6/2010 19:11:01 | 25.422 | 4/28/2010 13:39:00 | 25.5 | 4/7/2010 17:09:01 | 26.512 |
| 4/6/2010 19:31:01 | 25.422 | 4/28/2010 14:14:00 | 25.5 | 4/7/2010 17:29:01 | 26.512 |
| 4/6/2010 19:51:01 | 25.422 | 4/28/2010 14:49:00 | 25.5 | 4/7/2010 17:49:01 | 26.512 |
| 4/6/2010 20:11:01 | 25.422 | 4/28/2010 15:24:00 | 25.5 | 4/7/2010 18:09:01 | 26.512 |
| 4/6/2010 20:31:01 | 25.422 | 4/28/2010 15:59:00 | 26.0 | 4/7/2010 18:29:01 | 26.512 |
| 4/6/2010 20:51:01 | 25.422 | 4/28/2010 16:34:00 | 26.0 | 4/7/2010 18:49:01 | 26.512 |
| 4/6/2010 21:11:01 | 25.422 | 4/28/2010 17:09:00 | 26.0 | 4/7/2010 19:09:01 | 26.512 |
| 4/6/2010 21:31:01 | 25.422 | 4/28/2010 17:44:00 | 26.0 | 4/7/2010 19:29:01 | 26.512 |
| 4/6/2010 21:51:01 | 25.422 | 4/28/2010 18:19:00 | 26.0 | 4/7/2010 19:49:01 | 26.512 |
| 4/6/2010 22:11:01 | 25.484 | 4/28/2010 18:54:00 | 26.0 | 4/7/2010 20:09:01 | 26.512 |
| 4/6/2010 22:31:01 | 25.484 | 4/28/2010 19:29:00 | 26.0 | 4/7/2010 20:29:01 | 26.512 |
| 4/6/2010 22:51:01 | 25.484 | 4/28/2010 20:04:00 | 26.0 | 4/7/2010 20:49:01 | 26.512 |
| 4/6/2010 23:11:01 | 25.484 | 4/28/2010 20:39:00 | 26.0 | 4/7/2010 21:09:01 | 26.512 |
| 4/6/2010 23:31:01 | 25.484 | 4/28/2010 21:14:00 | 26.0 | 4/7/2010 21:29:01 | 26.574 |
| 4/6/2010 23:51:01 | 25.484 | 4/28/2010 21:49:00 | 26.0 | 4/7/2010 21:49:01 | 26.574 |
| 4/7/2010 00:11:01 | 25.484 | 4/28/2010 22:24:00 | 26.0 | 4/7/2010 22:09:01 | 26.574 |
| 4/7/2010 00:31:01 | 25.484 | 4/28/2010 22:59:00 | 26.0 | 4/7/2010 22:29:01 | 26.574 |
| 4/7/2010 00:51:01 | 25.484 | 4/28/2010 23:34:00 | 26.0 | 4/7/2010 22:49:01 | 26.574 |
| 4/7/2010 01:11:01 | 25.484 | 4/29/2010 00:09:00 | 26.0 | 4/7/2010 23:09:01 | 26.574 |
| 4/7/2010 01:31:01 | 25.484 | 4/29/2010 00:44:00 | 26.0 | 4/7/2010 23:29:01 | 26.574 |
| 4/7/2010 01:51:01 | 25.484 | 4/29/2010 01:19:00 | 26.0 | 4/7/2010 23:49:01 | 26.574 |
| 4/7/2010 02:11:01 | 25.484 | 4/29/2010 01:54:00 | 26.0 | 4/8/2010 00:09:01 | 26.574 |
| 4/7/2010 02:31:01 | 25.484 | 4/29/2010 02:29:00 | 26.0 | 4/8/2010 00:29:01 | 26.574 |
| 4/7/2010 02:51:01 | 25.484 | 4/29/2010 03:04:00 | 26.0 | 4/8/2010 00:49:01 | 26.574 |
| 4/7/2010 03:11:01 | 25.484 | 4/29/2010 03:39:00 | 26.0 | 4/8/2010 01:09:01 | 26.574 |
| 4/7/2010 03:31:01 | 25.484 | 4/29/2010 04:14:00 | 26.0 | 4/8/2010 01:29:01 | 26.574 |
| 4/7/2010 03:51:01 | 25.484 | 4/29/2010 04:49:00 | 26.0 | 4/8/2010 01:49:01 | 26.574 |
| 4/7/2010 04:11:01 | 25.484 | 4/29/2010 05:24:00 | 25.5 | 4/8/2010 02:09:01 | 26.637 |
| 4/7/2010 04:31:01 | 25.484 | 4/29/2010 05:59:00 | 25.5 | 4/8/2010 02:29:01 | 26.637 |
| 4/7/2010 04:51:01 | 25.484 | 4/29/2010 06:34:00 | 25.5 | 4/8/2010 02:49:01 | 26.637 |
| 4/7/2010 05:11:01 | 25.484 | 4/29/2010 07:09:00 | 25.5 | 4/8/2010 03:09:01 | 26.637 |
| 4/7/2010 05:31:01 | 25.484 | 4/29/2010 07:44:00 | 25.5 | 4/8/2010 03:29:01 | 26.637 |
| 4/7/2010 05:51:01 | 25.484 | 4/29/2010 08:19:00 | 25.5 | 4/8/2010 03:49:01 | 26.637 |
| 4/7/2010 06:11:01 | 25.484 | 4/29/2010 08:54:00 | 25.5 | 4/8/2010 04:09:01 | 26.637 |
| 4/7/2010 06:31:01 | 25.484 | 4/29/2010 09:29:00 | 25.5 | 4/8/2010 04:29:01 | 26.637 |
| 4/7/2010 06:51:01 | 25.484 | 4/29/2010 10:04:00 | 25.5 | 4/8/2010 04:49:01 | 26.637 |
| 4/7/2010 07:11:01 | 25.484 | 4/29/2010 10:39:00 | 25.5 | 4/8/2010 05:09:01 | 26.637 |
| 4/7/2010 07:31:01 | 25.484 | 4/29/2010 11:14:00 | 25.5 | 4/8/2010 05:29:01 | 26.637 |
| 4/7/2010 07:51:01 | 25.484 | 4/29/2010 11:49:00 | 25.5 | 4/8/2010 05:49:01 | 26.637 |
| 4/7/2010 08:11:01 | 25.484 | 4/29/2010 12:24:00 | 25.5 | 4/8/2010 06:09:01 | 26.637 |

|                   |        |                    |      |                   |        |
|-------------------|--------|--------------------|------|-------------------|--------|
| 4/7/2010 08:31:01 | 25.484 | 4/29/2010 12:59:00 | 25.5 | 4/8/2010 06:29:01 | 26.637 |
| 4/7/2010 08:51:01 | 25.484 | 4/29/2010 13:34:00 | 25.5 | 4/8/2010 06:49:01 | 26.637 |
| 4/7/2010 09:11:01 | 25.484 | 4/29/2010 14:09:00 | 25.5 | 4/8/2010 07:09:01 | 26.637 |
| 4/7/2010 09:31:01 | 25.484 | 4/29/2010 14:44:00 | 25.5 | 4/8/2010 07:29:01 | 26.637 |
| 4/7/2010 09:51:01 | 25.484 | 4/29/2010 15:19:00 | 25.5 | 4/8/2010 07:49:01 | 26.637 |
| 4/7/2010 10:11:01 | 25.484 | 4/29/2010 15:54:00 | 25.5 | 4/8/2010 08:09:01 | 26.637 |
| 4/7/2010 10:31:01 | 25.484 | 4/29/2010 16:29:00 | 25.5 | 4/8/2010 08:29:01 | 26.637 |
| 4/7/2010 10:51:01 | 25.484 | 4/29/2010 17:04:00 | 25.5 | 4/8/2010 08:49:01 | 26.637 |
| 4/7/2010 11:11:01 | 25.484 | 4/29/2010 17:39:00 | 25.5 | 4/8/2010 09:09:01 | 26.637 |
| 4/7/2010 11:31:01 | 25.484 | 4/29/2010 18:14:00 | 25.5 | 4/8/2010 09:29:01 | 26.637 |
| 4/7/2010 11:51:01 | 25.484 | 4/29/2010 18:49:00 | 25.5 | 4/8/2010 09:49:01 | 26.637 |
| 4/7/2010 12:11:01 | 25.484 | 4/29/2010 19:24:00 | 25.5 | 4/8/2010 10:09:01 | 26.637 |
| 4/7/2010 12:31:01 | 25.484 | 4/29/2010 19:59:00 | 25.5 | 4/8/2010 10:29:01 | 26.637 |
| 4/7/2010 12:51:01 | 25.484 | 4/29/2010 20:34:00 | 25.5 | 4/8/2010 10:49:01 | 26.637 |
| 4/7/2010 13:11:01 | 25.484 | 4/29/2010 21:09:00 | 25.5 | 4/8/2010 11:09:01 | 26.637 |
| 4/7/2010 13:31:01 | 25.484 | 4/29/2010 21:44:00 | 26.0 | 4/8/2010 11:29:01 | 26.637 |
| 4/7/2010 13:51:01 | 25.484 | 4/29/2010 22:19:00 | 25.5 | 4/8/2010 11:49:01 | 26.637 |
| 4/7/2010 14:11:01 | 25.484 | 4/29/2010 22:54:00 | 25.5 | 4/8/2010 12:09:01 | 26.637 |
| 4/7/2010 14:31:01 | 25.484 | 4/29/2010 23:29:00 | 25.5 | 4/8/2010 12:29:01 | 26.637 |
| 4/7/2010 14:51:01 | 25.484 | 4/30/2010 00:04:00 | 25.5 | 4/8/2010 12:49:01 | 26.637 |
| 4/7/2010 15:11:01 | 25.484 | 4/30/2010 00:39:00 | 25.5 | 4/8/2010 13:09:01 | 26.637 |
| 4/7/2010 15:31:01 | 25.484 | 4/30/2010 01:14:00 | 25.5 | 4/8/2010 13:29:01 | 26.637 |
| 4/7/2010 15:51:01 | 25.484 | 4/30/2010 01:49:00 | 25.5 | 4/8/2010 13:49:01 | 26.637 |
| 4/7/2010 16:11:01 | 25.484 | 4/30/2010 02:24:00 | 25.5 | 4/8/2010 14:09:01 | 26.637 |
| 4/7/2010 16:31:01 | 25.484 | 4/30/2010 02:59:00 | 25.5 | 4/8/2010 14:29:01 | 26.637 |
| 4/7/2010 16:51:01 | 25.484 | 4/30/2010 03:34:00 | 25.5 | 4/8/2010 14:49:01 | 26.637 |
| 4/7/2010 17:11:01 | 25.484 | 4/30/2010 04:09:00 | 25.5 | 4/8/2010 15:09:01 | 26.637 |
| 4/7/2010 17:31:01 | 25.484 | 4/30/2010 04:44:00 | 25.5 | 4/8/2010 15:29:01 | 26.637 |
| 4/7/2010 17:51:01 | 25.484 | 4/30/2010 05:19:00 | 25.5 | 4/8/2010 15:49:01 | 26.637 |
| 4/7/2010 18:11:01 | 25.484 | 4/30/2010 05:54:00 | 25.5 | 4/8/2010 16:09:01 | 26.637 |
| 4/7/2010 18:31:01 | 25.484 | 4/30/2010 06:29:00 | 25.0 | 4/8/2010 16:29:01 | 26.637 |
| 4/7/2010 18:51:01 | 25.484 | 4/30/2010 07:04:00 | 25.0 | 4/8/2010 16:49:01 | 26.637 |
| 4/7/2010 19:11:01 | 25.484 | 4/30/2010 07:39:00 | 25.0 | 4/8/2010 17:09:01 | 26.637 |
| 4/7/2010 19:31:01 | 25.484 | 4/30/2010 08:14:00 | 25.0 | 4/8/2010 17:29:01 | 26.637 |
| 4/7/2010 19:51:01 | 25.484 | 4/30/2010 08:49:00 | 25.0 | 4/8/2010 17:49:01 | 26.637 |
| 4/7/2010 20:11:01 | 25.484 | 4/30/2010 09:24:00 | 25.0 | 4/8/2010 18:09:01 | 26.637 |
| 4/7/2010 20:31:01 | 25.484 | 4/30/2010 09:59:00 | 25.0 | 4/8/2010 18:29:01 | 26.637 |
| 4/7/2010 20:51:01 | 25.484 | 4/30/2010 10:34:00 | 25.0 | 4/8/2010 18:49:01 | 26.637 |
| 4/7/2010 21:11:01 | 25.484 | 4/30/2010 11:09:00 | 25.0 | 4/8/2010 19:09:01 | 26.637 |
| 4/7/2010 21:31:01 | 25.484 | 4/30/2010 11:44:00 | 25.0 | 4/8/2010 19:29:01 | 26.637 |
| 4/7/2010 21:51:01 | 25.547 | 4/30/2010 12:19:00 | 25.0 | 4/8/2010 19:49:01 | 26.637 |
| 4/7/2010 22:11:01 | 25.547 | 4/30/2010 12:54:00 | 25.0 | 4/8/2010 20:09:01 | 26.637 |
| 4/7/2010 22:31:01 | 25.547 | 4/30/2010 13:29:00 | 25.0 | 4/8/2010 20:29:01 | 26.637 |
| 4/7/2010 22:51:01 | 25.547 | 4/30/2010 14:04:00 | 25.0 | 4/8/2010 20:49:01 | 26.637 |
| 4/7/2010 23:11:01 | 25.547 | 4/30/2010 14:39:00 | 25.0 | 4/8/2010 21:09:01 | 26.637 |
| 4/7/2010 23:31:01 | 25.547 | 4/30/2010 15:14:00 | 25.0 | 4/8/2010 21:29:01 | 26.637 |
| 4/7/2010 23:51:01 | 25.547 | 4/30/2010 15:49:00 | 25.0 | 4/8/2010 21:49:01 | 26.637 |
| 4/8/2010 00:11:01 | 25.547 | 4/30/2010 16:24:00 | 25.5 | 4/8/2010 22:09:01 | 26.637 |
| 4/8/2010 00:31:01 | 25.547 | 4/30/2010 16:59:00 | 25.5 | 4/8/2010 22:29:01 | 26.637 |
| 4/8/2010 00:51:01 | 25.547 | 4/30/2010 17:34:00 | 25.5 | 4/8/2010 22:49:01 | 26.637 |



|                   |        |                    |      |                   |        |
|-------------------|--------|--------------------|------|-------------------|--------|
| 4/8/2010 01:11:01 | 25.547 | 4/30/2010 18:09:00 | 25.5 | 4/8/2010 23:09:01 | 26.637 |
| 4/8/2010 01:31:01 | 25.547 | 4/30/2010 18:44:00 | 25.5 | 4/8/2010 23:29:01 | 26.637 |
| 4/8/2010 01:51:01 | 25.547 | 4/30/2010 19:19:00 | 25.5 | 4/8/2010 23:49:01 | 26.637 |
| 4/8/2010 02:11:01 | 25.547 | 4/30/2010 19:54:00 | 25.5 | 4/9/2010 00:09:01 | 26.637 |
| 4/8/2010 02:31:01 | 25.547 | 4/30/2010 20:29:00 | 25.5 | 4/9/2010 00:29:01 | 26.637 |
| 4/8/2010 02:51:01 | 25.547 | 4/30/2010 21:04:00 | 25.5 | 4/9/2010 00:49:01 | 26.637 |
| 4/8/2010 03:11:01 | 25.547 | 4/30/2010 21:39:00 | 25.5 | 4/9/2010 01:09:01 | 26.699 |
| 4/8/2010 03:31:01 | 25.547 | 4/30/2010 22:14:00 | 25.5 | 4/9/2010 01:29:01 | 26.637 |
| 4/8/2010 03:51:01 | 25.547 | 4/30/2010 22:49:00 | 25.5 | 4/9/2010 01:49:01 | 26.699 |
| 4/8/2010 04:11:01 | 25.547 | 4/30/2010 23:24:00 | 25.5 | 4/9/2010 02:09:01 | 26.699 |
| 4/8/2010 04:31:01 | 25.547 | 4/30/2010 23:59:00 | 25.5 | 4/9/2010 02:29:01 | 26.699 |
| 4/8/2010 04:51:01 | 25.547 | 5/1/2010 00:34:00  | 25.5 | 4/9/2010 02:49:01 | 26.699 |
| 4/8/2010 05:11:01 | 25.609 | 5/1/2010 01:09:00  | 25.5 | 4/9/2010 03:09:01 | 26.699 |
| 4/8/2010 05:31:01 | 25.547 | 5/1/2010 01:44:00  | 25.5 | 4/9/2010 03:29:01 | 26.699 |
| 4/8/2010 05:51:01 | 25.609 | 5/1/2010 02:19:00  | 25.5 | 4/9/2010 03:49:01 | 26.699 |
| 4/8/2010 06:11:01 | 25.609 | 5/1/2010 02:54:00  | 25.5 | 4/9/2010 04:09:01 | 26.699 |
| 4/8/2010 06:31:01 | 25.609 | 5/1/2010 03:29:00  | 25.5 | 4/9/2010 04:29:01 | 26.699 |
| 4/8/2010 06:51:01 | 25.609 | 5/1/2010 04:04:00  | 25.5 | 4/9/2010 04:49:01 | 26.699 |
| 4/8/2010 07:11:01 | 25.609 | 5/1/2010 04:39:00  | 25.5 | 4/9/2010 05:09:01 | 26.699 |
| 4/8/2010 07:31:01 | 25.609 | 5/1/2010 05:14:00  | 25.5 | 4/9/2010 05:29:01 | 26.699 |
| 4/8/2010 07:51:01 | 25.609 | 5/1/2010 05:49:00  | 25.0 | 4/9/2010 05:49:01 | 26.699 |
| 4/8/2010 08:11:01 | 25.609 | 5/1/2010 06:24:00  | 25.0 | 4/9/2010 06:09:01 | 26.699 |
| 4/8/2010 08:31:01 | 25.609 | 5/1/2010 06:59:00  | 25.0 | 4/9/2010 06:29:01 | 26.699 |
| 4/8/2010 08:51:01 | 25.609 | 5/1/2010 07:34:00  | 25.0 | 4/9/2010 06:49:01 | 26.699 |
| 4/8/2010 09:11:01 | 25.609 | 5/1/2010 08:09:00  | 25.0 | 4/9/2010 07:09:01 | 26.699 |
| 4/8/2010 09:31:01 | 25.547 | 5/1/2010 08:44:00  | 25.0 | 4/9/2010 07:29:01 | 26.699 |
| 4/8/2010 09:51:01 | 25.547 | 5/1/2010 09:19:00  | 25.0 | 4/9/2010 07:49:01 | 26.699 |
| 4/8/2010 10:11:01 | 25.547 | 5/1/2010 09:54:00  | 25.0 | 4/9/2010 08:09:01 | 26.699 |
| 4/8/2010 10:31:01 | 25.547 | 5/1/2010 10:29:00  | 25.0 | 4/9/2010 08:29:01 | 26.699 |
| 4/8/2010 10:51:01 | 25.547 | 5/1/2010 11:04:00  | 25.0 | 4/9/2010 08:49:01 | 26.699 |
| 4/8/2010 11:11:01 | 25.547 | 5/1/2010 11:39:00  | 25.0 | 4/9/2010 09:09:01 | 26.699 |
| 4/8/2010 11:31:01 | 25.547 | 5/1/2010 12:14:00  | 25.0 | 4/9/2010 09:29:01 | 26.699 |
| 4/8/2010 11:51:01 | 25.547 | 5/1/2010 12:49:00  | 25.0 | 4/9/2010 09:49:01 | 26.699 |
| 4/8/2010 12:11:01 | 25.547 | 5/1/2010 13:24:00  | 25.0 | 4/9/2010 10:09:01 | 26.699 |
| 4/8/2010 12:31:01 | 25.547 | 5/1/2010 13:59:00  | 25.5 | 4/9/2010 10:29:01 | 26.699 |
| 4/8/2010 12:51:01 | 25.547 | 5/1/2010 14:34:00  | 25.5 | 4/9/2010 10:49:01 | 26.699 |
| 4/8/2010 13:11:01 | 25.547 | 5/1/2010 15:09:00  | 25.5 | 4/9/2010 11:09:01 | 26.699 |
| 4/8/2010 13:31:01 | 25.547 | 5/1/2010 15:44:00  | 25.5 | 4/9/2010 11:29:01 | 26.699 |
| 4/8/2010 13:51:01 | 25.547 | 5/1/2010 16:19:00  | 25.5 | 4/9/2010 11:49:01 | 26.699 |
| 4/8/2010 14:11:01 | 25.547 | 5/1/2010 16:54:00  | 25.5 | 4/9/2010 12:09:01 | 26.699 |
| 4/8/2010 14:31:01 | 25.547 | 5/1/2010 17:29:00  | 25.5 | 4/9/2010 12:29:01 | 26.699 |
| 4/8/2010 14:51:01 | 25.547 | 5/1/2010 18:04:00  | 25.5 | 4/9/2010 12:49:01 | 26.699 |
| 4/8/2010 15:11:01 | 25.547 | 5/1/2010 18:39:00  | 25.5 | 4/9/2010 13:09:01 | 26.699 |
| 4/8/2010 15:31:01 | 25.547 | 5/1/2010 19:14:00  | 25.5 | 4/9/2010 13:29:01 | 26.699 |
| 4/8/2010 15:51:01 | 25.547 | 5/1/2010 19:49:00  | 25.5 | 4/9/2010 13:49:01 | 26.699 |
| 4/8/2010 16:11:01 | 25.547 | 5/1/2010 20:24:00  | 26.0 | 4/9/2010 14:09:01 | 26.699 |
| 4/8/2010 16:31:01 | 25.547 | 5/1/2010 20:59:00  | 26.0 | 4/9/2010 14:29:01 | 26.699 |
| 4/8/2010 16:51:01 | 25.547 | 5/1/2010 21:34:00  | 26.0 | 4/9/2010 14:49:01 | 26.699 |
| 4/8/2010 17:11:01 | 25.547 | 5/1/2010 22:09:00  | 26.0 | 4/9/2010 15:09:01 | 26.699 |
| 4/8/2010 17:31:01 | 25.547 | 5/1/2010 22:44:00  | 26.0 | 4/9/2010 15:29:01 | 26.699 |

|                   |        |                   |      |                    |        |
|-------------------|--------|-------------------|------|--------------------|--------|
| 4/8/2010 17:51:01 | 25.547 | 5/1/2010 23:19:00 | 25.5 | 4/9/2010 15:49:01  | 26.699 |
| 4/8/2010 18:11:01 | 25.547 | 5/1/2010 23:54:00 | 25.5 | 4/9/2010 16:09:01  | 26.699 |
| 4/8/2010 18:31:01 | 25.547 | 5/2/2010 00:29:00 | 25.5 | 4/9/2010 16:29:01  | 26.699 |
| 4/8/2010 18:51:01 | 25.547 | 5/2/2010 01:04:00 | 25.5 | 4/9/2010 16:49:01  | 26.637 |
| 4/8/2010 19:11:01 | 25.547 | 5/2/2010 01:39:00 | 25.5 | 4/9/2010 17:09:01  | 26.699 |
| 4/8/2010 19:31:01 | 25.547 | 5/2/2010 02:14:00 | 25.5 | 4/9/2010 17:29:01  | 26.699 |
| 4/8/2010 19:51:01 | 25.547 | 5/2/2010 02:49:00 | 25.5 | 4/9/2010 17:49:01  | 26.637 |
| 4/8/2010 20:11:01 | 25.547 | 5/2/2010 03:24:00 | 25.5 | 4/9/2010 18:09:01  | 26.637 |
| 4/8/2010 20:31:01 | 25.547 | 5/2/2010 03:59:00 | 25.5 | 4/9/2010 18:29:01  | 26.637 |
| 4/8/2010 20:51:01 | 25.547 | 5/2/2010 04:34:00 | 25.5 | 4/9/2010 18:49:01  | 26.637 |
| 4/8/2010 21:11:01 | 25.609 | 5/2/2010 05:09:00 | 25.5 | 4/9/2010 19:09:01  | 26.637 |
| 4/8/2010 21:31:01 | 25.609 | 5/2/2010 05:44:00 | 25.5 | 4/9/2010 19:29:01  | 26.637 |
| 4/8/2010 21:51:01 | 25.609 | 5/2/2010 06:19:00 | 25.5 | 4/9/2010 19:49:01  | 26.637 |
| 4/8/2010 22:11:01 | 25.609 | 5/2/2010 06:54:00 | 25.5 | 4/9/2010 20:09:01  | 26.699 |
| 4/8/2010 22:31:01 | 25.609 | 5/2/2010 07:29:00 | 26.0 | 4/9/2010 20:29:01  | 26.699 |
| 4/8/2010 22:51:01 | 25.609 | 5/2/2010 08:04:00 | 26.5 | 4/9/2010 20:49:01  | 26.699 |
| 4/8/2010 23:11:01 | 25.609 | 5/2/2010 08:39:00 | 26.0 | 4/9/2010 21:09:01  | 26.699 |
| 4/8/2010 23:31:01 | 25.609 | 5/2/2010 09:14:00 | 26.0 | 4/9/2010 21:29:01  | 26.699 |
| 4/8/2010 23:51:01 | 25.609 | 5/2/2010 09:49:00 | 26.0 | 4/9/2010 21:49:01  | 26.699 |
| 4/9/2010 00:11:01 | 25.609 | 5/2/2010 10:24:00 | 26.0 | 4/9/2010 22:09:01  | 26.699 |
| 4/9/2010 00:31:01 | 25.609 | 5/2/2010 10:59:00 | 26.0 | 4/9/2010 22:29:01  | 26.699 |
| 4/9/2010 00:51:01 | 25.609 | 5/2/2010 11:34:00 | 26.0 | 4/9/2010 22:49:01  | 26.699 |
| 4/9/2010 01:11:01 | 25.609 | 5/2/2010 12:09:00 | 26.0 | 4/9/2010 23:09:01  | 26.699 |
| 4/9/2010 01:31:01 | 25.609 | 5/2/2010 12:44:00 | 26.0 | 4/9/2010 23:29:01  | 26.699 |
| 4/9/2010 01:51:01 | 25.609 | 5/2/2010 13:19:00 | 26.0 | 4/9/2010 23:49:01  | 26.699 |
| 4/9/2010 02:11:01 | 25.609 | 5/2/2010 13:54:00 | 26.0 | 4/10/2010 00:09:01 | 26.699 |
| 4/9/2010 02:31:01 | 25.609 | 5/2/2010 14:29:00 | 26.0 | 4/10/2010 00:29:01 | 26.699 |
| 4/9/2010 02:51:01 | 25.609 | 5/2/2010 15:04:00 | 26.0 | 4/10/2010 00:49:01 | 26.699 |
| 4/9/2010 03:11:01 | 25.672 | 5/2/2010 15:39:00 | 26.0 | 4/10/2010 01:09:01 | 26.699 |
| 4/9/2010 03:31:01 | 25.609 | 5/2/2010 16:14:00 | 26.0 | 4/10/2010 01:29:01 | 26.699 |
| 4/9/2010 03:51:01 | 25.609 | 5/2/2010 16:49:00 | 26.0 | 4/10/2010 01:49:01 | 26.699 |
| 4/9/2010 04:11:01 | 25.609 | 5/2/2010 17:24:00 | 26.0 | 4/10/2010 02:09:01 | 26.699 |
| 4/9/2010 04:31:01 | 25.609 | 5/2/2010 17:59:00 | 26.0 | 4/10/2010 02:29:01 | 26.699 |
| 4/9/2010 04:51:01 | 25.609 | 5/2/2010 18:34:00 | 26.0 | 4/10/2010 02:49:01 | 26.699 |
| 4/9/2010 05:11:01 | 25.672 | 5/2/2010 19:09:00 | 26.0 | 4/10/2010 03:09:01 | 26.699 |
| 4/9/2010 05:31:01 | 25.609 | 5/2/2010 19:44:00 | 26.0 | 4/10/2010 03:29:01 | 26.699 |
| 4/9/2010 05:51:01 | 25.609 | 5/2/2010 20:19:00 | 26.0 | 4/10/2010 03:49:01 | 26.699 |
| 4/9/2010 06:11:01 | 25.609 | 5/2/2010 20:54:00 | 26.0 | 4/10/2010 04:09:01 | 26.762 |
| 4/9/2010 06:31:01 | 25.609 | 5/2/2010 21:29:00 | 26.0 | 4/10/2010 04:29:01 | 26.699 |
| 4/9/2010 06:51:01 | 25.609 | 5/2/2010 22:04:00 | 26.0 | 4/10/2010 04:49:01 | 26.762 |
| 4/9/2010 07:11:01 | 25.609 | 5/2/2010 22:39:00 | 26.0 | 4/10/2010 05:09:01 | 26.699 |
| 4/9/2010 07:31:01 | 25.609 | 5/2/2010 23:14:00 | 26.0 | 4/10/2010 05:29:01 | 26.762 |
| 4/9/2010 07:51:01 | 25.609 | 5/2/2010 23:49:00 | 26.0 | 4/10/2010 05:49:01 | 26.762 |
| 4/9/2010 08:11:01 | 25.609 | 5/3/2010 00:24:00 | 26.0 | 4/10/2010 06:09:01 | 26.762 |
| 4/9/2010 08:31:01 | 25.609 | 5/3/2010 00:59:00 | 26.0 | 4/10/2010 06:29:01 | 26.762 |
| 4/9/2010 08:51:01 | 25.609 | 5/3/2010 01:34:00 | 26.0 | 4/10/2010 06:49:01 | 26.762 |
| 4/9/2010 09:11:01 | 25.609 | 5/3/2010 02:09:00 | 26.0 | 4/10/2010 07:09:01 | 26.762 |
| 4/9/2010 09:31:01 | 25.609 | 5/3/2010 02:44:00 | 26.0 | 4/10/2010 07:29:01 | 26.762 |
| 4/9/2010 09:51:01 | 25.609 | 5/3/2010 03:19:00 | 26.0 | 4/10/2010 07:49:01 | 26.762 |
| 4/9/2010 10:11:01 | 25.609 | 5/3/2010 03:54:00 | 26.0 | 4/10/2010 08:09:01 | 26.762 |

|                    |        |                   |      |                    |        |
|--------------------|--------|-------------------|------|--------------------|--------|
| 4/9/2010 10:31:01  | 25.609 | 5/3/2010 04:29:00 | 25.5 | 4/10/2010 08:29:01 | 26.762 |
| 4/9/2010 10:51:01  | 25.609 | 5/3/2010 05:04:00 | 25.5 | 4/10/2010 08:49:01 | 26.762 |
| 4/9/2010 11:11:01  | 25.609 | 5/3/2010 05:39:00 | 25.5 | 4/10/2010 09:09:01 | 26.762 |
| 4/9/2010 11:31:01  | 25.609 | 5/3/2010 06:14:00 | 25.5 | 4/10/2010 09:29:01 | 26.762 |
| 4/9/2010 11:51:01  | 25.609 | 5/3/2010 06:49:00 | 25.5 | 4/10/2010 09:49:01 | 26.762 |
| 4/9/2010 12:11:01  | 25.609 | 5/3/2010 07:24:00 | 25.5 | 4/10/2010 10:09:01 | 26.762 |
| 4/9/2010 12:31:01  | 25.609 | 5/3/2010 07:59:00 | 25.5 | 4/10/2010 10:29:01 | 26.762 |
| 4/9/2010 12:51:01  | 25.609 | 5/3/2010 08:34:00 | 25.5 | 4/10/2010 10:49:01 | 26.762 |
| 4/9/2010 13:11:01  | 25.609 | 5/3/2010 09:09:00 | 25.5 | 4/10/2010 11:09:01 | 26.762 |
| 4/9/2010 13:31:01  | 25.609 | 5/3/2010 09:44:00 | 25.5 | 4/10/2010 11:29:01 | 26.762 |
| 4/9/2010 13:51:01  | 25.609 | 5/3/2010 10:19:00 | 25.5 | 4/10/2010 11:49:01 | 26.762 |
| 4/9/2010 14:11:01  | 25.547 | 5/3/2010 10:54:00 | 25.5 | 4/10/2010 12:09:01 | 26.762 |
| 4/9/2010 14:31:01  | 25.547 | 5/3/2010 11:29:00 | 25.5 | 4/10/2010 12:29:01 | 26.699 |
| 4/9/2010 14:51:01  | 25.547 | 5/3/2010 12:04:00 | 25.5 | 4/10/2010 12:49:01 | 26.762 |
| 4/9/2010 15:11:01  | 25.547 | 5/3/2010 12:39:00 | 25.5 | 4/10/2010 13:09:01 | 26.699 |
| 4/9/2010 15:31:01  | 25.547 | 5/3/2010 13:14:00 | 25.5 | 4/10/2010 13:29:01 | 26.699 |
| 4/9/2010 15:51:01  | 25.547 | 5/3/2010 13:49:00 | 25.5 | 4/10/2010 13:49:01 | 26.699 |
| 4/9/2010 16:11:01  | 25.547 | 5/3/2010 14:24:00 | 25.5 | 4/10/2010 14:09:01 | 26.699 |
| 4/9/2010 16:31:01  | 25.547 | 5/3/2010 14:59:00 | 25.5 | 4/10/2010 14:29:01 | 26.699 |
| 4/9/2010 16:51:01  | 25.547 | 5/3/2010 15:34:00 | 26.0 | 4/10/2010 14:49:01 | 26.699 |
| 4/9/2010 17:11:01  | 25.547 | 5/3/2010 16:09:00 | 26.0 | 4/10/2010 15:09:01 | 26.699 |
| 4/9/2010 17:31:01  | 25.547 | 5/3/2010 16:44:00 | 26.0 | 4/10/2010 15:29:01 | 26.699 |
| 4/9/2010 17:51:01  | 25.547 | 5/3/2010 17:19:00 | 26.0 | 4/10/2010 15:49:01 | 26.699 |
| 4/9/2010 18:11:01  | 25.547 | 5/3/2010 17:54:00 | 26.0 | 4/10/2010 16:09:01 | 26.699 |
| 4/9/2010 18:31:01  | 25.547 | 5/3/2010 18:29:00 | 26.0 | 4/10/2010 16:29:01 | 26.699 |
| 4/9/2010 18:51:01  | 25.547 | 5/3/2010 19:04:00 | 26.0 | 4/10/2010 16:49:01 | 26.699 |
| 4/9/2010 19:11:01  | 25.547 | 5/3/2010 19:39:00 | 26.0 | 4/10/2010 17:09:01 | 26.699 |
| 4/9/2010 19:31:01  | 25.547 | 5/3/2010 20:14:00 | 26.0 | 4/10/2010 17:29:01 | 26.699 |
| 4/9/2010 19:51:01  | 25.547 | 5/3/2010 20:49:00 | 26.0 | 4/10/2010 17:49:01 | 26.699 |
| 4/9/2010 20:11:01  | 25.609 | 5/3/2010 21:24:00 | 26.0 | 4/10/2010 18:09:01 | 26.699 |
| 4/9/2010 20:31:01  | 25.609 | 5/3/2010 21:59:00 | 26.0 | 4/10/2010 18:29:01 | 26.699 |
| 4/9/2010 20:51:01  | 25.609 | 5/3/2010 22:34:00 | 26.0 | 4/10/2010 18:49:01 | 26.699 |
| 4/9/2010 21:11:01  | 25.609 | 5/3/2010 23:09:00 | 26.0 | 4/10/2010 19:09:01 | 26.699 |
| 4/9/2010 21:31:01  | 25.609 | 5/3/2010 23:44:00 | 26.0 | 4/10/2010 19:29:01 | 26.699 |
| 4/9/2010 21:51:01  | 25.609 | 5/4/2010 00:19:00 | 26.0 | 4/10/2010 19:49:01 | 26.699 |
| 4/9/2010 22:11:01  | 25.609 | 5/4/2010 00:54:00 | 26.0 | 4/10/2010 20:09:01 | 26.699 |
| 4/9/2010 22:31:01  | 25.609 | 5/4/2010 01:29:00 | 26.0 | 4/10/2010 20:29:01 | 26.699 |
| 4/9/2010 22:51:01  | 25.609 | 5/4/2010 02:04:00 | 26.0 | 4/10/2010 20:49:01 | 26.699 |
| 4/9/2010 23:11:01  | 25.609 | 5/4/2010 02:39:00 | 26.0 | 4/10/2010 21:09:01 | 26.699 |
| 4/9/2010 23:31:01  | 25.609 | 5/4/2010 03:14:00 | 26.0 | 4/10/2010 21:29:01 | 26.699 |
| 4/9/2010 23:51:01  | 25.609 | 5/4/2010 03:49:00 | 26.0 | 4/10/2010 21:49:01 | 26.699 |
| 4/10/2010 00:11:01 | 25.609 | 5/4/2010 04:24:00 | 26.0 | 4/10/2010 22:09:01 | 26.699 |
| 4/10/2010 00:31:01 | 25.609 | 5/4/2010 04:59:00 | 26.0 | 4/10/2010 22:29:01 | 26.699 |
| 4/10/2010 00:51:01 | 25.609 | 5/4/2010 05:34:00 | 26.0 | 4/10/2010 22:49:01 | 26.699 |
| 4/10/2010 01:11:01 | 25.609 | 5/4/2010 06:09:00 | 26.0 | 4/10/2010 23:09:01 | 26.699 |
| 4/10/2010 01:31:01 | 25.609 | 5/4/2010 06:44:00 | 26.0 | 4/10/2010 23:29:01 | 26.699 |
| 4/10/2010 01:51:01 | 25.609 | 5/4/2010 07:19:00 | 26.0 | 4/10/2010 23:49:01 | 26.699 |
| 4/10/2010 02:11:01 | 25.609 | 5/4/2010 07:54:00 | 26.0 | 4/11/2010 00:09:01 | 26.699 |
| 4/10/2010 02:31:01 | 25.672 | 5/4/2010 08:29:00 | 26.0 | 4/11/2010 00:29:01 | 26.699 |
| 4/10/2010 02:51:01 | 25.609 | 5/4/2010 09:04:00 | 26.0 | 4/11/2010 00:49:01 | 26.699 |

|                    |        |                   |      |                    |        |
|--------------------|--------|-------------------|------|--------------------|--------|
| 4/10/2010 03:11:01 | 25.672 | 5/4/2010 09:39:00 | 26.0 | 4/11/2010 01:09:01 | 26.699 |
| 4/10/2010 03:31:01 | 25.609 | 5/4/2010 10:14:00 | 26.0 | 4/11/2010 01:29:01 | 26.699 |
| 4/10/2010 03:51:01 | 25.609 | 5/4/2010 10:49:00 | 26.0 | 4/11/2010 01:49:01 | 26.699 |
| 4/10/2010 04:11:01 | 25.609 | 5/4/2010 11:24:00 | 26.0 | 4/11/2010 02:09:01 | 26.762 |
| 4/10/2010 04:31:01 | 25.609 | 5/4/2010 11:59:00 | 26.0 | 4/11/2010 02:29:01 | 26.699 |
| 4/10/2010 04:51:01 | 25.672 | 5/4/2010 12:34:00 | 26.0 | 4/11/2010 02:49:01 | 26.762 |
| 4/10/2010 05:11:01 | 25.672 | 5/4/2010 13:09:00 | 26.0 | 4/11/2010 03:09:01 | 26.762 |
| 4/10/2010 05:31:01 | 25.609 | 5/4/2010 13:44:00 | 26.0 | 4/11/2010 03:29:01 | 26.762 |
| 4/10/2010 05:51:01 | 25.672 | 5/4/2010 14:19:00 | 26.0 | 4/11/2010 03:49:01 | 26.762 |
| 4/10/2010 06:11:01 | 25.672 | 5/4/2010 14:54:00 | 26.0 | 4/11/2010 04:09:01 | 26.699 |
| 4/10/2010 06:31:01 | 25.672 | 5/4/2010 15:29:00 | 26.0 | 4/11/2010 04:29:01 | 26.762 |
| 4/10/2010 06:51:01 | 25.609 | 5/4/2010 16:04:00 | 26.0 | 4/11/2010 04:49:01 | 26.762 |
| 4/10/2010 07:11:01 | 25.609 | 5/4/2010 16:39:00 | 26.0 | 4/11/2010 05:09:01 | 26.762 |
| 4/10/2010 07:31:01 | 25.609 | 5/4/2010 17:14:00 | 26.0 | 4/11/2010 05:29:01 | 26.762 |
| 4/10/2010 07:51:01 | 25.609 | 5/4/2010 17:49:00 | 26.5 | 4/11/2010 05:49:01 | 26.762 |
| 4/10/2010 08:11:01 | 25.609 | 5/4/2010 18:24:00 | 26.5 | 4/11/2010 06:09:01 | 26.762 |
| 4/10/2010 08:31:01 | 25.609 | 5/4/2010 18:59:00 | 26.5 | 4/11/2010 06:29:01 | 26.762 |
| 4/10/2010 08:51:01 | 25.609 | 5/4/2010 19:34:00 | 26.5 | 4/11/2010 06:49:01 | 26.762 |
| 4/10/2010 09:11:01 | 25.609 | 5/4/2010 20:09:00 | 26.5 | 4/11/2010 07:09:01 | 26.762 |
| 4/10/2010 09:31:01 | 25.609 | 5/4/2010 20:44:00 | 26.5 | 4/11/2010 07:29:01 | 26.762 |
| 4/10/2010 09:51:01 | 25.609 | 5/4/2010 21:19:00 | 26.5 | 4/11/2010 07:49:01 | 26.762 |
| 4/10/2010 10:11:01 | 25.609 | 5/4/2010 21:54:00 | 26.5 | 4/11/2010 08:09:01 | 26.762 |
| 4/10/2010 10:31:01 | 25.609 | 5/4/2010 22:29:00 | 26.5 | 4/11/2010 08:29:01 | 26.762 |
| 4/10/2010 10:51:01 | 25.609 | 5/4/2010 23:04:00 | 26.5 | 4/11/2010 08:49:01 | 26.762 |
| 4/10/2010 11:11:01 | 25.609 | 5/4/2010 23:39:00 | 26.5 | 4/11/2010 09:09:01 | 26.762 |
| 4/10/2010 11:31:01 | 25.609 | 5/5/2010 00:14:00 | 26.5 | 4/11/2010 09:29:01 | 26.762 |
| 4/10/2010 11:51:01 | 25.609 | 5/5/2010 00:49:00 | 26.5 | 4/11/2010 09:49:01 | 26.762 |
| 4/10/2010 12:11:01 | 25.547 | 5/5/2010 01:24:00 | 26.5 | 4/11/2010 10:09:01 | 26.762 |
| 4/10/2010 12:31:01 | 25.547 | 5/5/2010 01:59:00 | 26.0 | 4/11/2010 10:29:01 | 26.762 |
| 4/10/2010 12:51:01 | 25.547 | 5/5/2010 02:34:00 | 26.0 | 4/11/2010 10:49:01 | 26.762 |
| 4/10/2010 13:11:01 | 25.547 | 5/5/2010 03:09:00 | 26.0 | 4/11/2010 11:09:01 | 26.762 |
| 4/10/2010 13:31:01 | 25.547 | 5/5/2010 03:44:00 | 26.0 | 4/11/2010 11:29:01 | 26.762 |
| 4/10/2010 13:51:01 | 25.547 | 5/5/2010 04:19:00 | 26.0 | 4/11/2010 11:49:01 | 26.762 |
| 4/10/2010 14:11:01 | 25.547 | 5/5/2010 04:54:00 | 26.0 | 4/11/2010 12:09:01 | 26.762 |
| 4/10/2010 14:31:01 | 25.547 | 5/5/2010 05:29:00 | 26.0 | 4/11/2010 12:29:01 | 26.699 |
| 4/10/2010 14:51:01 | 25.547 | 5/5/2010 06:04:00 | 26.0 | 4/11/2010 12:49:01 | 26.699 |
| 4/10/2010 15:11:01 | 25.547 | 5/5/2010 06:39:00 | 26.0 | 4/11/2010 13:09:01 | 26.699 |
| 4/10/2010 15:31:01 | 25.547 | 5/5/2010 07:14:00 | 26.0 | 4/11/2010 13:29:01 | 26.699 |
| 4/10/2010 15:51:01 | 25.547 | 5/5/2010 07:49:00 | 26.0 | 4/11/2010 13:49:01 | 26.699 |
| 4/10/2010 16:11:01 | 25.547 | 5/5/2010 08:24:00 | 26.0 | 4/11/2010 14:09:01 | 26.699 |
| 4/10/2010 16:31:01 | 25.547 | 5/5/2010 08:59:00 | 25.5 | 4/11/2010 14:29:01 | 26.699 |
| 4/10/2010 16:51:01 | 25.547 | 5/5/2010 09:34:00 | 25.5 | 4/11/2010 14:49:01 | 26.699 |
| 4/10/2010 17:11:01 | 25.547 | 5/5/2010 10:09:00 | 25.5 | 4/11/2010 15:09:01 | 26.699 |
| 4/10/2010 17:31:01 | 25.547 | 5/5/2010 10:44:00 | 25.5 | 4/11/2010 15:29:01 | 26.699 |
| 4/10/2010 17:51:01 | 25.547 | 5/5/2010 11:19:00 | 25.5 | 4/11/2010 15:49:01 | 26.699 |
| 4/10/2010 18:11:01 | 25.547 | 5/5/2010 11:54:00 | 25.5 | 4/11/2010 16:09:01 | 26.699 |
| 4/10/2010 18:31:01 | 25.547 | 5/5/2010 12:29:00 | 25.5 | 4/11/2010 16:29:01 | 26.699 |
| 4/10/2010 18:51:01 | 25.547 | 5/5/2010 13:04:00 | 25.5 | 4/11/2010 16:49:01 | 26.699 |
| 4/10/2010 19:11:01 | 25.547 | 5/5/2010 13:39:00 | 25.5 | 4/11/2010 17:09:01 | 26.699 |
| 4/10/2010 19:31:01 | 25.547 | 5/5/2010 14:14:00 | 25.5 | 4/11/2010 17:29:01 | 26.699 |

|                    |                          |                         |        |
|--------------------|--------------------------|-------------------------|--------|
| 4/10/2010 19:51:01 | 25.547 5/5/2010 14:49:00 | 26.0 4/11/2010 17:49:01 | 26.699 |
| 4/10/2010 20:11:01 | 25.547 5/5/2010 15:24:00 | 26.0 4/11/2010 18:09:01 | 26.699 |
| 4/10/2010 20:31:01 | 25.547 5/5/2010 15:59:00 | 26.0 4/11/2010 18:29:01 | 26.699 |
| 4/10/2010 20:51:01 | 25.547 5/5/2010 16:34:00 | 26.0 4/11/2010 18:49:01 | 26.699 |
| 4/10/2010 21:11:01 | 25.547 5/5/2010 17:09:00 | 26.0 4/11/2010 19:09:01 | 26.699 |
| 4/10/2010 21:31:01 | 25.547 5/5/2010 17:44:00 | 26.0 4/11/2010 19:29:01 | 26.699 |
| 4/10/2010 21:51:01 | 25.547 5/5/2010 18:19:00 | 26.0 4/11/2010 19:49:01 | 26.699 |
| 4/10/2010 22:11:01 | 25.547 5/5/2010 18:54:00 | 26.0 4/11/2010 20:09:01 | 26.699 |
| 4/10/2010 22:31:01 | 25.547 5/5/2010 19:29:00 | 26.0 4/11/2010 20:29:01 | 26.699 |
| 4/10/2010 22:51:01 | 25.547 5/5/2010 20:04:00 | 26.0 4/11/2010 20:49:01 | 26.699 |
| 4/10/2010 23:11:01 | 25.547 5/5/2010 20:39:00 | 26.0 4/11/2010 21:09:01 | 26.699 |
| 4/10/2010 23:31:01 | 25.547 5/5/2010 21:14:00 | 26.0 4/11/2010 21:29:01 | 26.699 |
| 4/10/2010 23:51:01 | 25.547 5/5/2010 21:49:00 | 26.0 4/11/2010 21:49:01 | 26.699 |
| 4/11/2010 00:11:01 | 25.547 5/5/2010 22:24:00 | 26.0 4/11/2010 22:09:01 | 26.699 |
| 4/11/2010 00:31:01 | 25.547 5/5/2010 22:59:00 | 26.0 4/11/2010 22:29:01 | 26.699 |
| 4/11/2010 00:51:01 | 25.547 5/5/2010 23:34:00 | 26.0 4/11/2010 22:49:01 | 26.699 |
| 4/11/2010 01:11:01 | 25.547 5/6/2010 00:09:00 | 26.0 4/11/2010 23:09:01 | 26.699 |
| 4/11/2010 01:31:01 | 25.547 5/6/2010 00:44:00 | 26.0 4/11/2010 23:29:01 | 26.699 |
| 4/11/2010 01:51:01 | 25.609 5/6/2010 01:19:00 | 26.0 4/11/2010 23:49:01 | 26.699 |
| 4/11/2010 02:11:01 | 25.547 5/6/2010 01:54:00 | 26.0 4/12/2010 00:09:01 | 26.699 |
| 4/11/2010 02:31:01 | 25.609 5/6/2010 02:29:00 | 26.0 4/12/2010 00:29:01 | 26.699 |
| 4/11/2010 02:51:01 | 25.609 5/6/2010 03:04:00 | 26.0 4/12/2010 00:49:01 | 26.699 |
| 4/11/2010 03:11:01 | 25.609 5/6/2010 03:39:00 | 26.0 4/12/2010 01:09:01 | 26.699 |
| 4/11/2010 03:31:01 | 25.609 5/6/2010 04:14:00 | 26.0 4/12/2010 01:29:01 | 26.699 |
| 4/11/2010 03:51:01 | 25.609 5/6/2010 04:49:00 | 26.0 4/12/2010 01:49:01 | 26.699 |
| 4/11/2010 04:11:01 | 25.609 5/6/2010 05:24:00 | 26.0 4/12/2010 02:09:01 | 26.699 |
| 4/11/2010 04:31:01 | 25.547 5/6/2010 05:59:00 | 26.0 4/12/2010 02:29:01 | 26.699 |
| 4/11/2010 04:51:01 | 25.609 5/6/2010 06:34:00 | 26.0 4/12/2010 02:49:01 | 26.699 |
| 4/11/2010 05:11:01 | 25.609 5/6/2010 07:09:00 | 25.5 4/12/2010 03:09:01 | 26.699 |
| 4/11/2010 05:31:01 | 25.547 5/6/2010 07:44:00 | 25.5 4/12/2010 03:29:01 | 26.699 |
| 4/11/2010 05:51:01 | 25.547 5/6/2010 08:19:00 | 25.5 4/12/2010 03:49:01 | 26.699 |
| 4/11/2010 06:11:01 | 25.547 5/6/2010 08:54:00 | 25.5 4/12/2010 04:09:01 | 26.699 |
| 4/11/2010 06:31:01 | 25.547 5/6/2010 09:29:00 | 25.5 4/12/2010 04:29:01 | 26.699 |
| 4/11/2010 06:51:01 | 25.547 5/6/2010 10:04:00 | 25.5 4/12/2010 04:49:01 | 26.699 |
| 4/11/2010 07:11:01 | 25.547 5/6/2010 10:39:00 | 25.5 4/12/2010 05:09:01 | 26.699 |
| 4/11/2010 07:31:01 | 25.547 5/6/2010 11:14:00 | 25.5 4/12/2010 05:29:01 | 26.699 |
| 4/11/2010 07:51:01 | 25.547 5/6/2010 11:49:00 | 25.5 4/12/2010 05:49:01 | 26.699 |
| 4/11/2010 08:11:01 | 25.547 5/6/2010 12:24:00 | 25.5 4/12/2010 06:09:01 | 26.699 |
| 4/11/2010 08:31:01 | 25.547 5/6/2010 12:59:00 | 25.5 4/12/2010 06:29:01 | 26.699 |
| 4/11/2010 08:51:01 | 25.547 5/6/2010 13:34:00 | 25.5 4/12/2010 06:49:01 | 26.637 |
| 4/11/2010 09:11:01 | 25.547 5/6/2010 14:09:00 | 25.5 4/12/2010 07:09:01 | 26.637 |
| 4/11/2010 09:31:01 | 25.547 5/6/2010 14:44:00 | 25.5 4/12/2010 07:29:01 | 26.637 |
| 4/11/2010 09:51:01 | 25.547 5/6/2010 15:19:00 | 26.0 4/12/2010 07:49:01 | 26.637 |
| 4/11/2010 10:11:01 | 25.547 5/6/2010 15:54:00 | 26.0 4/12/2010 08:09:01 | 26.637 |
| 4/11/2010 10:31:01 | 25.547 5/6/2010 16:29:00 | 26.0 4/12/2010 08:29:01 | 26.637 |
| 4/11/2010 10:51:01 | 25.547 5/6/2010 17:04:00 | 26.0 4/12/2010 08:49:01 | 26.637 |
| 4/11/2010 11:11:01 | 25.484 5/6/2010 17:39:00 | 26.0 4/12/2010 09:09:01 | 26.637 |
| 4/11/2010 11:31:01 | 25.484 5/6/2010 18:14:00 | 26.0 4/12/2010 09:29:01 | 26.574 |
| 4/11/2010 11:51:01 | 25.484 5/6/2010 18:49:00 | 26.0 4/12/2010 09:49:01 | 26.574 |
| 4/11/2010 12:11:01 | 25.484 5/6/2010 19:24:00 | 26.0 4/12/2010 10:09:01 | 26.574 |

|                    |                          |                         |        |
|--------------------|--------------------------|-------------------------|--------|
| 4/11/2010 12:31:01 | 25.484 5/6/2010 19:59:00 | 26.0 4/12/2010 10:29:01 | 26.574 |
| 4/11/2010 12:51:01 | 25.484 5/6/2010 20:34:00 | 26.0 4/12/2010 10:49:01 | 26.574 |
| 4/11/2010 13:11:01 | 25.484 5/6/2010 21:09:00 | 26.0 4/12/2010 11:09:01 | 26.574 |
| 4/11/2010 13:31:01 | 25.484 5/6/2010 21:44:00 | 26.0 4/12/2010 11:29:01 | 26.574 |
| 4/11/2010 13:51:01 | 25.484 5/6/2010 22:19:00 | 26.0 4/12/2010 11:49:01 | 26.512 |
| 4/11/2010 14:11:01 | 25.484 5/6/2010 22:54:00 | 26.0 4/12/2010 12:09:01 | 26.512 |
| 4/11/2010 14:31:01 | 25.484 5/6/2010 23:29:00 | 26.0 4/12/2010 12:29:01 | 26.512 |
| 4/11/2010 14:51:01 | 25.484 5/7/2010 00:04:00 | 26.0 4/12/2010 12:49:01 | 26.512 |
| 4/11/2010 15:11:01 | 25.422 5/7/2010 00:39:00 | 26.0 4/12/2010 13:09:01 | 26.512 |
| 4/11/2010 15:31:01 | 25.422 5/7/2010 01:14:00 | 26.0 4/12/2010 13:29:01 | 26.512 |
| 4/11/2010 15:51:01 | 25.422 5/7/2010 01:49:00 | 26.0 4/12/2010 13:49:01 | 26.512 |
| 4/11/2010 16:11:01 | 25.422 5/7/2010 02:24:00 | 26.0 4/12/2010 14:09:01 | 26.512 |
| 4/11/2010 16:31:01 | 25.422 5/7/2010 02:59:00 | 25.5 4/12/2010 14:29:01 | 26.449 |
| 4/11/2010 16:51:01 | 25.422 5/7/2010 03:34:00 | 25.5 4/12/2010 14:49:01 | 26.449 |
| 4/11/2010 17:11:01 | 25.422 5/7/2010 04:09:00 | 25.5 4/12/2010 15:09:01 | 26.449 |
| 4/11/2010 17:31:01 | 25.422 5/7/2010 04:44:00 | 25.5 4/12/2010 15:29:01 | 26.449 |
| 4/11/2010 17:51:01 | 25.422 5/7/2010 05:19:00 | 25.5 4/12/2010 15:49:01 | 26.449 |
| 4/11/2010 18:11:01 | 25.422 5/7/2010 05:54:00 | 25.5 4/12/2010 16:09:01 | 26.449 |
| 4/11/2010 18:31:01 | 25.422 5/7/2010 06:29:00 | 25.5 4/12/2010 16:29:01 | 26.449 |
| 4/11/2010 18:51:01 | 25.422 5/7/2010 07:04:00 | 25.5 4/12/2010 16:49:01 | 26.449 |
| 4/11/2010 19:11:01 | 25.422 5/7/2010 07:39:00 | 25.5 4/12/2010 17:09:01 | 26.449 |
| 4/11/2010 19:31:01 | 25.422 5/7/2010 08:14:00 | 25.5 4/12/2010 17:29:01 | 26.449 |
| 4/11/2010 19:51:01 | 25.422 5/7/2010 08:49:00 | 25.5 4/12/2010 17:49:01 | 26.449 |
| 4/11/2010 20:11:01 | 25.422 5/7/2010 09:24:00 | 25.5 4/12/2010 18:09:01 | 26.449 |
| 4/11/2010 20:31:01 | 25.422 5/7/2010 09:59:00 | 25.5 4/12/2010 18:29:01 | 26.449 |
| 4/11/2010 20:51:01 | 25.422 5/7/2010 10:34:00 | 25.5 4/12/2010 18:49:01 | 26.449 |
| 4/11/2010 21:11:01 | 25.484 5/7/2010 11:09:00 | 25.5 4/12/2010 19:09:01 | 26.449 |
| 4/11/2010 21:31:01 | 25.484 5/7/2010 11:44:00 | 25.5 4/12/2010 19:29:01 | 26.449 |
| 4/11/2010 21:51:01 | 25.484 5/7/2010 12:19:00 | 25.5 4/12/2010 19:49:01 | 26.449 |
| 4/11/2010 22:11:01 | 25.484 5/7/2010 12:54:00 | 25.5 4/12/2010 20:09:01 | 26.449 |
| 4/11/2010 22:31:01 | 25.484 5/7/2010 13:29:00 | 25.5 4/12/2010 20:29:01 | 26.449 |
| 4/11/2010 22:51:01 | 25.484 5/7/2010 14:04:00 | 25.5 4/12/2010 20:49:01 | 26.449 |
| 4/11/2010 23:11:01 | 25.484 5/7/2010 14:39:00 | 25.5 4/12/2010 21:09:01 | 26.449 |
| 4/11/2010 23:31:01 | 25.484 5/7/2010 15:14:00 | 25.5 4/12/2010 21:29:01 | 26.512 |
| 4/11/2010 23:51:01 | 25.484 5/7/2010 15:49:00 | 25.5 4/12/2010 21:49:01 | 26.449 |
| 4/12/2010 00:11:01 | 25.484 5/7/2010 16:24:00 | 25.5 4/12/2010 22:09:01 | 26.449 |
| 4/12/2010 00:31:01 | 25.484 5/7/2010 16:59:00 | 25.5 4/12/2010 22:29:01 | 26.512 |
| 4/12/2010 00:51:01 | 25.484 5/7/2010 17:34:00 | 25.5 4/12/2010 22:49:01 | 26.512 |
| 4/12/2010 01:11:01 | 25.484 5/7/2010 18:09:00 | 25.5 4/12/2010 23:09:01 | 26.512 |
| 4/12/2010 01:31:01 | 25.484 5/7/2010 18:44:00 | 25.5 4/12/2010 23:29:01 | 26.512 |
| 4/12/2010 01:51:01 | 25.484 5/7/2010 19:19:00 | 25.5 4/12/2010 23:49:01 | 26.512 |
| 4/12/2010 02:11:01 | 25.484 5/7/2010 19:54:00 | 26.0 4/13/2010 00:09:01 | 26.512 |
| 4/12/2010 02:31:01 | 25.484 5/7/2010 20:29:00 | 26.0 4/13/2010 00:29:01 | 26.512 |
| 4/12/2010 02:51:01 | 25.484 5/7/2010 21:04:00 | 26.0 4/13/2010 00:49:01 | 26.512 |
| 4/12/2010 03:11:01 | 25.484 5/7/2010 21:39:00 | 26.0 4/13/2010 01:09:01 | 26.512 |
| 4/12/2010 03:31:01 | 25.484 5/7/2010 22:14:00 | 26.0 4/13/2010 01:29:01 | 26.512 |
| 4/12/2010 03:51:01 | 25.484 5/7/2010 22:49:00 | 26.0 4/13/2010 01:49:01 | 26.512 |
| 4/12/2010 04:11:01 | 25.484 5/7/2010 23:24:00 | 25.5 4/13/2010 02:09:01 | 26.512 |
| 4/12/2010 04:31:01 | 25.484 5/7/2010 23:59:00 | 25.5 4/13/2010 02:29:01 | 26.512 |
| 4/12/2010 04:51:01 | 25.484 5/8/2010 00:34:00 | 25.5 4/13/2010 02:49:01 | 26.512 |

|                    |        |                   |      |                    |        |
|--------------------|--------|-------------------|------|--------------------|--------|
| 4/12/2010 05:11:01 | 25.484 | 5/8/2010 01:09:00 | 25.5 | 4/13/2010 03:09:01 | 26.512 |
| 4/12/2010 05:31:01 | 25.484 | 5/8/2010 01:44:00 | 25.5 | 4/13/2010 03:29:01 | 26.512 |
| 4/12/2010 05:51:01 | 25.484 | 5/8/2010 02:19:00 | 25.5 | 4/13/2010 03:49:01 | 26.512 |
| 4/12/2010 06:11:01 | 25.484 | 5/8/2010 02:54:00 | 25.5 | 4/13/2010 04:09:01 | 26.512 |
| 4/12/2010 06:31:01 | 25.484 | 5/8/2010 03:29:00 | 25.5 | 4/13/2010 04:29:01 | 26.512 |
| 4/12/2010 06:51:01 | 25.484 | 5/8/2010 04:04:00 | 25.5 | 4/13/2010 04:49:01 | 26.512 |
| 4/12/2010 07:11:01 | 25.484 | 5/8/2010 04:39:00 | 25.5 | 4/13/2010 05:09:01 | 26.449 |
| 4/12/2010 07:31:01 | 25.484 | 5/8/2010 05:14:00 | 25.5 | 4/13/2010 05:29:01 | 26.449 |
| 4/12/2010 07:51:01 | 25.484 | 5/8/2010 05:49:00 | 25.5 | 4/13/2010 05:49:01 | 26.449 |
| 4/12/2010 08:11:01 | 25.422 | 5/8/2010 06:24:00 | 26.0 | 4/13/2010 06:09:01 | 26.449 |
| 4/12/2010 08:31:01 | 25.422 | 5/8/2010 06:59:00 | 25.5 | 4/13/2010 06:29:01 | 26.449 |
| 4/12/2010 08:51:01 | 25.422 | 5/8/2010 07:34:00 | 25.5 | 4/13/2010 06:49:01 | 26.449 |
| 4/12/2010 09:11:01 | 25.422 | 5/8/2010 08:09:00 | 25.5 | 4/13/2010 07:09:01 | 26.449 |
| 4/12/2010 09:31:01 | 25.422 | 5/8/2010 08:44:00 | 25.0 | 4/13/2010 07:29:01 | 26.449 |
| 4/12/2010 09:51:01 | 25.422 | 5/8/2010 09:19:00 | 25.5 | 4/13/2010 07:49:01 | 26.449 |
| 4/12/2010 10:11:01 | 25.422 | 5/8/2010 09:54:00 | 25.5 | 4/13/2010 08:09:01 | 26.449 |
| 4/12/2010 10:31:01 | 25.422 | 5/8/2010 10:29:00 | 25.5 | 4/13/2010 08:29:01 | 26.449 |
| 4/12/2010 10:51:01 | 25.422 | 5/8/2010 11:04:00 | 25.0 | 4/13/2010 08:49:01 | 26.449 |
| 4/12/2010 11:11:01 | 25.422 | 5/8/2010 11:39:00 | 25.0 | 4/13/2010 09:09:01 | 26.449 |
| 4/12/2010 11:31:01 | 25.359 | 5/8/2010 12:14:00 | 25.0 | 4/13/2010 09:29:01 | 26.449 |
| 4/12/2010 11:51:01 | 25.359 | 5/8/2010 12:49:00 | 25.0 | 4/13/2010 09:49:01 | 26.449 |
| 4/12/2010 12:11:01 | 25.359 | 5/8/2010 13:24:00 | 25.5 | 4/13/2010 10:09:01 | 26.387 |
| 4/12/2010 12:31:01 | 25.359 | 5/8/2010 13:59:00 | 25.5 | 4/13/2010 10:29:01 | 26.387 |
| 4/12/2010 12:51:01 | 25.359 | 5/8/2010 14:34:00 | 25.5 | 4/13/2010 10:49:01 | 26.387 |
| 4/12/2010 13:11:01 | 25.359 | 5/8/2010 15:09:00 | 25.5 | 4/13/2010 11:09:01 | 26.387 |
| 4/12/2010 13:31:01 | 25.359 | 5/8/2010 15:44:00 | 25.5 | 4/13/2010 11:29:01 | 26.387 |
| 4/12/2010 13:51:01 | 25.359 | 5/8/2010 16:19:00 | 25.5 | 4/13/2010 11:49:01 | 26.387 |
| 4/12/2010 14:11:01 | 25.359 | 5/8/2010 16:54:00 | 25.5 | 4/13/2010 12:09:01 | 26.387 |
| 4/12/2010 14:31:01 | 25.359 | 5/8/2010 17:29:00 | 25.5 | 4/13/2010 12:29:01 | 26.387 |
| 4/12/2010 14:51:01 | 25.297 | 5/8/2010 18:04:00 | 25.5 | 4/13/2010 12:49:01 | 26.387 |
| 4/12/2010 15:11:01 | 25.297 | 5/8/2010 18:39:00 | 25.5 | 4/13/2010 13:09:01 | 26.387 |
| 4/12/2010 15:31:01 | 25.297 | 5/8/2010 19:14:00 | 25.5 | 4/13/2010 13:29:01 | 26.387 |
| 4/12/2010 15:51:01 | 25.297 | 5/8/2010 19:49:00 | 25.5 | 4/13/2010 13:49:01 | 26.387 |
| 4/12/2010 16:11:01 | 25.297 | 5/8/2010 20:24:00 | 25.5 | 4/13/2010 14:09:01 | 26.387 |
| 4/12/2010 16:31:01 | 25.297 | 5/8/2010 20:59:00 | 25.5 | 4/13/2010 14:29:01 | 26.324 |
| 4/12/2010 16:51:01 | 25.297 | 5/8/2010 21:34:00 | 25.5 | 4/13/2010 14:49:01 | 26.324 |
| 4/12/2010 17:11:01 | 25.297 | 5/8/2010 22:09:00 | 25.5 | 4/13/2010 15:09:01 | 26.324 |
| 4/12/2010 17:31:01 | 25.297 | 5/8/2010 22:44:00 | 25.5 | 4/13/2010 15:29:01 | 26.324 |
| 4/12/2010 17:51:01 | 25.297 | 5/8/2010 23:19:00 | 25.5 | 4/13/2010 15:49:01 | 26.324 |
| 4/12/2010 18:11:01 | 25.297 | 5/8/2010 23:54:00 | 25.5 | 4/13/2010 16:09:01 | 26.324 |
| 4/12/2010 18:31:01 | 25.297 | 5/9/2010 00:29:00 | 25.0 | 4/13/2010 16:29:01 | 26.324 |
| 4/12/2010 18:51:01 | 25.297 | 5/9/2010 01:04:00 | 25.0 | 4/13/2010 16:49:01 | 26.324 |
| 4/12/2010 19:11:01 | 25.297 | 5/9/2010 01:39:00 | 25.5 | 4/13/2010 17:09:01 | 26.324 |
| 4/12/2010 19:31:01 | 25.297 | 5/9/2010 02:14:00 | 25.5 | 4/13/2010 17:29:01 | 26.324 |
| 4/12/2010 19:51:01 | 25.359 | 5/9/2010 02:49:00 | 25.0 | 4/13/2010 17:49:01 | 26.324 |
| 4/12/2010 20:11:01 | 25.297 | 5/9/2010 03:24:00 | 25.0 | 4/13/2010 18:09:01 | 26.324 |
| 4/12/2010 20:31:01 | 25.297 | 5/9/2010 03:59:00 | 25.0 | 4/13/2010 18:29:01 | 26.324 |
| 4/12/2010 20:51:01 | 25.359 | 5/9/2010 04:34:00 | 25.0 | 4/13/2010 18:49:01 | 26.324 |
| 4/12/2010 21:11:01 | 25.359 | 5/9/2010 05:09:00 | 25.0 | 4/13/2010 19:09:01 | 26.324 |
| 4/12/2010 21:31:01 | 25.359 | 5/9/2010 05:44:00 | 25.0 | 4/13/2010 19:29:01 | 26.324 |

|                    |                           |                         |        |
|--------------------|---------------------------|-------------------------|--------|
| 4/12/2010 21:51:01 | 25.359 5/9/2010 06:19:00  | 25.0 4/13/2010 19:49:01 | 26.324 |
| 4/12/2010 22:11:01 | 25.359 5/9/2010 06:54:00  | 25.0 4/13/2010 20:09:01 | 26.387 |
| 4/12/2010 22:31:01 | 25.359 5/9/2010 07:29:00  | 25.0 4/13/2010 20:29:01 | 26.387 |
| 4/12/2010 22:51:01 | 25.359 5/9/2010 08:04:00  | 25.0 4/13/2010 20:49:01 | 26.387 |
| 4/12/2010 23:11:01 | 25.359 5/9/2010 08:39:00  | 24.5 4/13/2010 21:09:01 | 26.387 |
| 4/12/2010 23:31:01 | 25.359 5/9/2010 09:14:00  | 24.5 4/13/2010 21:29:01 | 26.387 |
| 4/12/2010 23:51:01 | 25.359 5/9/2010 09:49:00  | 24.5 4/13/2010 21:49:01 | 26.387 |
| 4/13/2010 00:11:01 | 25.359 5/9/2010 10:24:00  | 24.5 4/13/2010 22:09:01 | 26.387 |
| 4/13/2010 00:31:01 | 25.359 5/9/2010 10:59:00  | 24.5 4/13/2010 22:29:01 | 26.387 |
| 4/13/2010 00:51:01 | 25.359 5/9/2010 11:34:00  | 25.0 4/13/2010 22:49:01 | 26.387 |
| 4/13/2010 01:11:01 | 25.359 5/9/2010 12:09:00  | 25.0 4/13/2010 23:09:01 | 26.387 |
| 4/13/2010 01:31:01 | 25.359 5/9/2010 12:44:00  | 25.0 4/13/2010 23:29:01 | 26.387 |
| 4/13/2010 01:51:01 | 25.359 5/9/2010 13:19:00  | 25.0 4/13/2010 23:49:01 | 26.387 |
| 4/13/2010 02:11:01 | 25.359 5/9/2010 13:54:00  | 25.0 4/14/2010 00:09:01 | 26.387 |
| 4/13/2010 02:31:01 | 25.359 5/9/2010 14:29:00  | 25.0 4/14/2010 00:29:01 | 26.387 |
| 4/13/2010 02:51:01 | 25.359 5/9/2010 15:04:00  | 25.0 4/14/2010 00:49:01 | 26.387 |
| 4/13/2010 03:11:01 | 25.359 5/9/2010 15:39:00  | 25.0 4/14/2010 01:09:01 | 26.387 |
| 4/13/2010 03:31:01 | 25.359 5/9/2010 16:14:00  | 25.0 4/14/2010 01:29:01 | 26.387 |
| 4/13/2010 03:51:01 | 25.359 5/9/2010 16:49:00  | 25.0 4/14/2010 01:49:01 | 26.387 |
| 4/13/2010 04:11:01 | 25.359 5/9/2010 17:24:00  | 25.0 4/14/2010 02:09:01 | 26.387 |
| 4/13/2010 04:31:01 | 25.359 5/9/2010 17:59:00  | 25.5 4/14/2010 02:29:01 | 26.387 |
| 4/13/2010 04:51:01 | 25.359 5/9/2010 18:34:00  | 25.5 4/14/2010 02:49:01 | 26.387 |
| 4/13/2010 05:11:01 | 25.359 5/9/2010 19:09:00  | 25.5 4/14/2010 03:09:01 | 26.387 |
| 4/13/2010 05:31:01 | 25.359 5/9/2010 19:44:00  | 25.5 4/14/2010 03:29:01 | 26.387 |
| 4/13/2010 05:51:01 | 25.359 5/9/2010 20:19:00  | 25.5 4/14/2010 03:49:01 | 26.387 |
| 4/13/2010 06:11:01 | 25.359 5/9/2010 20:54:00  | 25.5 4/14/2010 04:09:01 | 26.387 |
| 4/13/2010 06:31:01 | 25.359 5/9/2010 21:29:00  | 25.5 4/14/2010 04:29:01 | 26.387 |
| 4/13/2010 06:51:01 | 25.359 5/9/2010 22:04:00  | 25.5 4/14/2010 04:49:01 | 26.387 |
| 4/13/2010 07:11:01 | 25.359 5/9/2010 22:39:00  | 25.5 4/14/2010 05:09:01 | 26.387 |
| 4/13/2010 07:31:01 | 25.359 5/9/2010 23:14:00  | 25.5 4/14/2010 05:29:01 | 26.387 |
| 4/13/2010 07:51:01 | 25.359 5/9/2010 23:49:00  | 25.5 4/14/2010 05:49:01 | 26.387 |
| 4/13/2010 08:11:01 | 25.359 5/10/2010 00:24:00 | 25.5 4/14/2010 06:09:01 | 26.387 |
| 4/13/2010 08:31:01 | 25.359 5/10/2010 00:59:00 | 25.5 4/14/2010 06:29:01 | 26.387 |
| 4/13/2010 08:51:01 | 25.359 5/10/2010 01:34:00 | 25.5 4/14/2010 06:49:01 | 26.387 |
| 4/13/2010 09:11:01 | 25.359 5/10/2010 02:09:00 | 25.5 4/14/2010 07:09:01 | 26.387 |
| 4/13/2010 09:31:01 | 25.359 5/10/2010 02:44:00 | 25.5 4/14/2010 07:29:01 | 26.324 |
| 4/13/2010 09:51:01 | 25.359 5/10/2010 03:19:00 | 25.0 4/14/2010 07:49:01 | 26.324 |
| 4/13/2010 10:11:01 | 25.359 5/10/2010 03:54:00 | 25.0 4/14/2010 08:09:01 | 26.324 |
| 4/13/2010 10:31:01 | 25.359 5/10/2010 04:29:00 | 25.0 4/14/2010 08:29:01 | 26.324 |
| 4/13/2010 10:51:01 | 25.359 5/10/2010 05:04:00 | 25.0 4/14/2010 08:49:01 | 26.324 |
| 4/13/2010 11:11:01 | 25.359 5/10/2010 05:39:00 | 25.0 4/14/2010 09:09:01 | 26.324 |
| 4/13/2010 11:31:01 | 25.359 5/10/2010 06:14:00 | 25.0 4/14/2010 09:29:01 | 26.324 |
| 4/13/2010 11:51:01 | 25.297 5/10/2010 06:49:00 | 25.0 4/14/2010 09:49:01 | 26.324 |
| 4/13/2010 12:11:01 | 25.297 5/10/2010 07:24:00 | 25.0 4/14/2010 10:09:01 | 26.324 |
| 4/13/2010 12:31:01 | 25.297 5/10/2010 07:59:00 | 25.0 4/14/2010 10:29:01 | 26.324 |
| 4/13/2010 12:51:01 | 25.297 5/10/2010 08:34:00 | 25.0 4/14/2010 10:49:01 | 26.262 |
| 4/13/2010 13:11:01 | 25.297 5/10/2010 09:09:00 | 25.0 4/14/2010 11:09:01 | 26.262 |
| 4/13/2010 13:31:01 | 25.297 5/10/2010 09:44:00 | 25.0 4/14/2010 11:29:01 | 26.262 |
| 4/13/2010 13:51:01 | 25.297 5/10/2010 10:19:00 | 25.0 4/14/2010 11:49:01 | 26.262 |
| 4/13/2010 14:11:01 | 25.297 5/10/2010 10:54:00 | 25.0 4/14/2010 12:09:01 | 26.262 |



|                    |        |                    |      |                    |        |
|--------------------|--------|--------------------|------|--------------------|--------|
| 4/13/2010 14:31:01 | 25.297 | 5/10/2010 11:29:00 | 25.0 | 4/14/2010 12:29:01 | 26.262 |
| 4/13/2010 14:51:01 | 25.297 | 5/10/2010 12:04:00 | 25.0 | 4/14/2010 12:49:01 | 26.262 |
| 4/13/2010 15:11:01 | 25.297 | 5/10/2010 12:39:00 | 25.0 | 4/14/2010 13:09:01 | 26.262 |
| 4/13/2010 15:31:01 | 25.297 | 5/10/2010 13:14:00 | 25.0 | 4/14/2010 13:29:01 | 26.199 |
| 4/13/2010 15:51:01 | 25.297 | 5/10/2010 13:49:00 | 25.0 | 4/14/2010 13:49:01 | 26.199 |
| 4/13/2010 16:11:01 | 25.297 | 5/10/2010 14:24:00 | 25.0 | 4/14/2010 14:09:01 | 26.199 |
| 4/13/2010 16:31:01 | 25.297 | 5/10/2010 14:59:00 | 25.0 | 4/14/2010 14:29:01 | 26.199 |
| 4/13/2010 16:51:01 | 25.297 | 5/10/2010 15:34:00 | 25.5 | 4/14/2010 14:49:01 | 26.199 |
| 4/13/2010 17:11:01 | 25.297 | 5/10/2010 16:09:00 | 25.5 | 4/14/2010 15:09:01 | 26.199 |
| 4/13/2010 17:31:01 | 25.297 | 5/10/2010 16:44:00 | 25.5 | 4/14/2010 15:29:01 | 26.199 |
| 4/13/2010 17:51:01 | 25.297 | 5/10/2010 17:19:00 | 25.5 | 4/14/2010 15:49:01 | 26.199 |
| 4/13/2010 18:11:01 | 25.297 | 5/10/2010 17:54:00 | 25.5 | 4/14/2010 16:09:01 | 26.199 |
| 4/13/2010 18:31:01 | 25.297 | 5/10/2010 18:29:00 | 25.5 | 4/14/2010 16:29:01 | 26.199 |
| 4/13/2010 18:51:01 | 25.297 | 5/10/2010 19:04:00 | 25.5 | 4/14/2010 16:49:01 | 26.199 |
| 4/13/2010 19:11:01 | 25.297 | 5/10/2010 19:39:00 | 25.5 | 4/14/2010 17:09:01 | 26.199 |
| 4/13/2010 19:31:01 | 25.297 | 5/10/2010 20:14:00 | 25.5 | 4/14/2010 17:29:01 | 26.199 |
| 4/13/2010 19:51:01 | 25.297 | 5/10/2010 20:49:00 | 25.5 | 4/14/2010 17:49:01 | 26.199 |
| 4/13/2010 20:11:01 | 25.297 | 5/10/2010 21:24:00 | 25.5 | 4/14/2010 18:09:01 | 26.199 |
| 4/13/2010 20:31:01 | 25.297 | 5/10/2010 21:59:00 | 25.5 | 4/14/2010 18:29:01 | 26.199 |
| 4/13/2010 20:51:01 | 25.297 | 5/10/2010 22:34:00 | 25.5 | 4/14/2010 18:49:01 | 26.199 |
| 4/13/2010 21:11:01 | 25.297 | 5/10/2010 23:09:00 | 25.5 | 4/14/2010 19:09:01 | 26.199 |
| 4/13/2010 21:31:01 | 25.297 | 5/10/2010 23:44:00 | 25.5 | 4/14/2010 19:29:01 | 26.199 |
| 4/13/2010 21:51:01 | 25.359 | 5/11/2010 00:19:00 | 25.5 | 4/14/2010 19:49:01 | 26.199 |
| 4/13/2010 22:11:01 | 25.359 | 5/11/2010 00:54:00 | 25.5 | 4/14/2010 20:09:01 | 26.199 |
| 4/13/2010 22:31:01 | 25.359 | 5/11/2010 01:29:00 | 25.5 | 4/14/2010 20:29:01 | 26.199 |
| 4/13/2010 22:51:01 | 25.359 | 5/11/2010 02:04:00 | 25.5 | 4/14/2010 20:49:01 | 26.262 |
| 4/13/2010 23:11:01 | 25.359 | 5/11/2010 02:39:00 | 25.5 | 4/14/2010 21:09:01 | 26.262 |
| 4/13/2010 23:31:01 | 25.359 | 5/11/2010 03:14:00 | 25.5 | 4/14/2010 21:29:01 | 26.262 |
| 4/13/2010 23:51:01 | 25.359 | 5/11/2010 03:49:00 | 25.5 | 4/14/2010 21:49:01 | 26.262 |
| 4/14/2010 00:11:01 | 25.359 | 5/11/2010 04:24:00 | 25.5 | 4/14/2010 22:09:01 | 26.262 |
| 4/14/2010 00:31:01 | 25.359 | 5/11/2010 04:59:00 | 25.5 | 4/14/2010 22:29:01 | 26.262 |
| 4/14/2010 00:51:01 | 25.359 | 5/11/2010 05:34:00 | 25.0 | 4/14/2010 22:49:01 | 26.262 |
| 4/14/2010 01:11:01 | 25.359 | 5/11/2010 06:09:00 | 25.0 | 4/14/2010 23:09:01 | 26.262 |
| 4/14/2010 01:31:01 | 25.359 | 5/11/2010 06:44:00 | 25.0 | 4/14/2010 23:29:01 | 26.262 |
| 4/14/2010 01:51:01 | 25.359 | 5/11/2010 07:19:00 | 25.0 | 4/14/2010 23:49:01 | 26.262 |
| 4/14/2010 02:11:01 | 25.359 | 5/11/2010 07:54:00 | 25.0 | 4/15/2010 00:09:01 | 26.262 |
| 4/14/2010 02:31:01 | 25.359 | 5/11/2010 08:29:00 | 25.0 | 4/15/2010 00:29:01 | 26.262 |
| 4/14/2010 02:51:01 | 25.359 | 5/11/2010 09:04:00 | 25.0 | 4/15/2010 00:49:01 | 26.262 |
| 4/14/2010 03:11:01 | 25.359 | 5/11/2010 09:39:00 | 25.0 | 4/15/2010 01:09:01 | 26.262 |
| 4/14/2010 03:31:01 | 25.359 | 5/11/2010 10:14:00 | 25.0 | 4/15/2010 01:29:01 | 26.262 |
| 4/14/2010 03:51:01 | 25.359 | 5/11/2010 10:49:00 | 25.0 | 4/15/2010 01:49:01 | 26.262 |
| 4/14/2010 04:11:01 | 25.359 | 5/11/2010 11:24:00 | 25.0 | 4/15/2010 02:09:01 | 26.262 |
| 4/14/2010 04:31:01 | 25.359 | 5/11/2010 11:59:00 | 25.0 | 4/15/2010 02:29:01 | 26.324 |
| 4/14/2010 04:51:01 | 25.359 | 5/11/2010 12:34:00 | 25.0 | 4/15/2010 02:49:01 | 26.324 |
| 4/14/2010 05:11:01 | 25.359 | 5/11/2010 13:09:00 | 25.0 | 4/15/2010 03:09:01 | 26.324 |
| 4/14/2010 05:31:01 | 25.359 | 5/11/2010 13:44:00 | 25.0 | 4/15/2010 03:29:01 | 26.324 |
| 4/14/2010 05:51:01 | 25.359 | 5/11/2010 14:19:00 | 25.0 | 4/15/2010 03:49:01 | 26.324 |
| 4/14/2010 06:11:01 | 25.359 | 5/11/2010 14:54:00 | 25.0 | 4/15/2010 04:09:01 | 26.324 |
| 4/14/2010 06:31:01 | 25.359 | 5/11/2010 15:29:00 | 25.5 | 4/15/2010 04:29:01 | 26.324 |
| 4/14/2010 06:51:01 | 25.359 | 5/11/2010 16:04:00 | 25.5 | 4/15/2010 04:49:01 | 26.324 |

|                    |        |                    |      |                    |        |
|--------------------|--------|--------------------|------|--------------------|--------|
| 4/14/2010 07:11:01 | 25.297 | 5/11/2010 16:39:00 | 25.5 | 4/15/2010 05:09:01 | 26.324 |
| 4/14/2010 07:31:01 | 25.297 | 5/11/2010 17:14:00 | 25.5 | 4/15/2010 05:29:01 | 26.324 |
| 4/14/2010 07:51:01 | 25.297 | 5/11/2010 17:49:00 | 25.5 | 4/15/2010 05:49:01 | 26.324 |
| 4/14/2010 08:11:01 | 25.297 | 5/11/2010 18:24:00 | 25.5 | 4/15/2010 06:09:01 | 26.324 |
| 4/14/2010 08:31:01 | 25.297 | 5/11/2010 18:59:00 | 25.5 | 4/15/2010 06:29:01 | 26.324 |
| 4/14/2010 08:51:01 | 25.297 | 5/11/2010 19:34:00 | 25.5 | 4/15/2010 06:49:01 | 26.324 |
| 4/14/2010 09:11:01 | 25.297 | 5/11/2010 20:09:00 | 25.5 | 4/15/2010 07:09:01 | 26.324 |
| 4/14/2010 09:31:01 | 25.297 | 5/11/2010 20:44:00 | 25.5 | 4/15/2010 07:29:01 | 26.324 |
| 4/14/2010 09:51:01 | 25.297 | 5/11/2010 21:19:00 | 25.5 | 4/15/2010 07:49:01 | 26.324 |
| 4/14/2010 10:11:01 | 25.297 | 5/11/2010 21:54:00 | 25.5 | 4/15/2010 08:09:01 | 26.324 |
| 4/14/2010 10:31:01 | 25.297 | 5/11/2010 22:29:00 | 25.5 | 4/15/2010 08:29:01 | 26.324 |
| 4/14/2010 10:51:01 | 25.297 | 5/11/2010 23:04:00 | 25.5 | 4/15/2010 08:49:01 | 26.324 |
| 4/14/2010 11:11:01 | 25.234 | 5/11/2010 23:39:00 | 25.0 | 4/15/2010 09:09:01 | 26.324 |
| 4/14/2010 11:31:01 | 25.234 | 5/12/2010 00:14:00 | 25.0 | 4/15/2010 09:29:01 | 26.262 |
| 4/14/2010 11:51:01 | 25.234 | 5/12/2010 00:49:00 | 25.0 | 4/15/2010 09:49:01 | 26.262 |
| 4/14/2010 12:11:01 | 25.234 | 5/12/2010 01:24:00 | 25.0 | 4/15/2010 10:09:01 | 26.324 |
| 4/14/2010 12:31:01 | 25.234 | 5/12/2010 01:59:00 | 25.0 | 4/15/2010 10:29:01 | 26.262 |
| 4/14/2010 12:51:01 | 25.234 | 5/12/2010 02:34:00 | 25.0 | 4/15/2010 10:49:01 | 26.262 |
| 4/14/2010 13:11:01 | 25.234 | 5/12/2010 03:09:00 | 25.0 | 4/15/2010 11:09:01 | 26.262 |
| 4/14/2010 13:31:01 | 25.234 | 5/12/2010 03:44:00 | 25.0 | 4/15/2010 11:29:01 | 26.262 |
| 4/14/2010 13:51:01 | 25.234 | 5/12/2010 04:19:00 | 25.0 | 4/15/2010 11:49:01 | 26.262 |
| 4/14/2010 14:11:01 | 25.172 | 5/12/2010 04:54:00 | 25.0 | 4/15/2010 12:09:01 | 26.262 |
| 4/14/2010 14:31:01 | 25.172 | 5/12/2010 05:29:00 | 25.0 | 4/15/2010 12:29:01 | 26.262 |
| 4/14/2010 14:51:01 | 25.172 | 5/12/2010 06:04:00 | 25.0 | 4/15/2010 12:49:01 | 26.262 |
| 4/14/2010 15:11:01 | 25.172 | 5/12/2010 06:39:00 | 25.0 | 4/15/2010 13:09:01 | 26.262 |
| 4/14/2010 15:31:01 | 25.172 | 5/12/2010 07:14:00 | 25.0 | 4/15/2010 13:29:01 | 26.262 |
| 4/14/2010 15:51:01 | 25.172 | 5/12/2010 07:49:00 | 25.0 | 4/15/2010 13:49:01 | 26.262 |
| 4/14/2010 16:11:01 | 25.172 | 5/12/2010 08:24:00 | 25.0 | 4/15/2010 14:09:01 | 26.262 |
| 4/14/2010 16:31:01 | 25.172 | 5/12/2010 08:59:00 | 24.5 | 4/15/2010 14:29:01 | 26.262 |
| 4/14/2010 16:51:01 | 25.172 | 5/12/2010 09:34:00 | 24.5 | 4/15/2010 14:49:01 | 26.262 |
| 4/14/2010 17:11:01 | 25.172 | 5/12/2010 10:09:00 | 24.5 | 4/15/2010 15:09:01 | 26.262 |
| 4/14/2010 17:31:01 | 25.172 | 5/12/2010 10:44:00 | 24.5 | 4/15/2010 15:29:01 | 26.262 |
| 4/14/2010 17:51:01 | 25.172 | 5/12/2010 11:19:00 | 24.5 | 4/15/2010 15:49:01 | 26.262 |
| 4/14/2010 18:11:01 | 25.172 | 5/12/2010 11:54:00 | 24.5 | 4/15/2010 16:09:01 | 26.262 |
| 4/14/2010 18:31:01 | 25.172 | 5/12/2010 12:29:00 | 25.0 | 4/15/2010 16:29:01 | 26.262 |
| 4/14/2010 18:51:01 | 25.172 | 5/12/2010 13:04:00 | 25.0 | 4/15/2010 16:49:01 | 26.262 |
| 4/14/2010 19:11:01 | 25.172 | 5/12/2010 13:39:00 | 25.0 | 4/15/2010 17:09:01 | 26.262 |
| 4/14/2010 19:31:01 | 25.172 | 5/12/2010 14:14:00 | 25.0 | 4/15/2010 17:29:01 | 26.262 |
| 4/14/2010 19:51:01 | 25.172 | 5/12/2010 14:49:00 | 25.0 | 4/15/2010 17:49:01 | 26.262 |
| 4/14/2010 20:11:01 | 25.172 | 5/12/2010 15:24:00 | 25.0 | 4/15/2010 18:09:01 | 26.262 |
| 4/14/2010 20:31:01 | 25.172 | 5/12/2010 15:59:00 | 25.0 | 4/15/2010 18:29:01 | 26.262 |
| 4/14/2010 20:51:01 | 25.172 | 5/12/2010 16:34:00 | 25.0 | 4/15/2010 18:49:01 | 26.262 |
| 4/14/2010 21:11:01 | 25.172 | 5/12/2010 17:09:00 | 25.0 | 4/15/2010 19:09:01 | 26.262 |
| 4/14/2010 21:31:01 | 25.172 | 5/12/2010 17:44:00 | 25.0 | 4/15/2010 19:29:01 | 26.262 |
| 4/14/2010 21:51:01 | 25.172 | 5/12/2010 18:19:00 | 25.0 | 4/15/2010 19:49:01 | 26.262 |
| 4/14/2010 22:11:01 | 25.172 | 5/12/2010 18:54:00 | 25.5 | 4/15/2010 20:09:01 | 26.262 |
| 4/14/2010 22:31:01 | 25.172 | 5/12/2010 19:29:00 | 25.5 | 4/15/2010 20:29:01 | 26.262 |
| 4/14/2010 22:51:01 | 25.172 | 5/12/2010 20:04:00 | 25.5 | 4/15/2010 20:49:01 | 26.262 |
| 4/14/2010 23:11:01 | 25.172 | 5/12/2010 20:39:00 | 25.5 | 4/15/2010 21:09:01 | 26.262 |
| 4/14/2010 23:31:01 | 25.234 | 5/12/2010 21:14:00 | 25.5 | 4/15/2010 21:29:01 | 26.262 |

|                    |                           |                         |        |
|--------------------|---------------------------|-------------------------|--------|
| 4/14/2010 23:51:01 | 25.234 5/12/2010 21:49:00 | 25.5 4/15/2010 21:49:01 | 26.262 |
| 4/15/2010 00:11:01 | 25.234 5/12/2010 22:24:00 | 25.5 4/15/2010 22:09:01 | 26.262 |
| 4/15/2010 00:31:01 | 25.234 5/12/2010 22:59:00 | 25.5 4/15/2010 22:29:01 | 26.262 |
| 4/15/2010 00:51:01 | 25.234 5/12/2010 23:34:00 | 25.5 4/15/2010 22:49:01 | 26.324 |
| 4/15/2010 01:11:01 | 25.234 5/13/2010 00:09:00 | 25.5 4/15/2010 23:09:01 | 26.324 |
| 4/15/2010 01:31:01 | 25.234 5/13/2010 00:44:00 | 25.5 4/15/2010 23:29:01 | 26.324 |
| 4/15/2010 01:51:01 | 25.234 5/13/2010 01:19:00 | 25.0 4/15/2010 23:49:01 | 26.324 |
| 4/15/2010 02:11:01 | 25.234 5/13/2010 01:54:00 | 25.0 4/16/2010 00:09:01 | 26.324 |
| 4/15/2010 02:31:01 | 25.234 5/13/2010 02:29:00 | 25.0 4/16/2010 00:29:01 | 26.324 |
| 4/15/2010 02:51:01 | 25.234 5/13/2010 03:04:00 | 25.0 4/16/2010 00:49:01 | 26.324 |
| 4/15/2010 03:11:01 | 25.234 5/13/2010 03:39:00 | 25.0 4/16/2010 01:09:01 | 26.324 |
| 4/15/2010 03:31:01 | 25.234 5/13/2010 04:14:00 | 25.0 4/16/2010 01:29:01 | 26.324 |
| 4/15/2010 03:51:01 | 25.234 5/13/2010 04:49:00 | 25.0 4/16/2010 01:49:01 | 26.324 |
| 4/15/2010 04:11:01 | 25.234 5/13/2010 05:24:00 | 25.0 4/16/2010 02:09:01 | 26.324 |
| 4/15/2010 04:31:01 | 25.234 5/13/2010 05:59:00 | 25.0 4/16/2010 02:29:01 | 26.324 |
| 4/15/2010 04:51:01 | 25.234 5/13/2010 06:34:00 | 25.0 4/16/2010 02:49:01 | 26.324 |
| 4/15/2010 05:11:01 | 25.234 5/13/2010 07:09:00 | 25.0 4/16/2010 03:09:01 | 26.324 |
| 4/15/2010 05:31:01 | 25.234 5/13/2010 07:44:00 | 25.0 4/16/2010 03:29:01 | 26.324 |
| 4/15/2010 05:51:01 | 25.234 5/13/2010 08:19:00 | 25.0 4/16/2010 03:49:01 | 26.324 |
| 4/15/2010 06:11:01 | 25.234 5/13/2010 08:54:00 | 25.0 4/16/2010 04:09:01 | 26.324 |
| 4/15/2010 06:31:01 | 25.234 5/13/2010 09:29:00 | 25.0 4/16/2010 04:29:01 | 26.324 |
| 4/15/2010 06:51:01 | 25.234 5/13/2010 10:04:00 | 25.0 4/16/2010 04:49:01 | 26.324 |
| 4/15/2010 07:11:01 | 25.234 5/13/2010 10:39:00 | 25.0 4/16/2010 05:09:01 | 26.324 |
| 4/15/2010 07:31:01 | 25.234 5/13/2010 11:14:00 | 25.0 4/16/2010 05:29:01 | 26.324 |
| 4/15/2010 07:51:01 | 25.234 5/13/2010 11:49:00 | 25.0 4/16/2010 05:49:01 | 26.324 |
| 4/15/2010 08:11:01 | 25.234 5/13/2010 12:24:00 | 25.0 4/16/2010 06:09:01 | 26.324 |
| 4/15/2010 08:31:01 | 25.234 5/13/2010 12:59:00 | 25.0 4/16/2010 06:29:01 | 26.324 |
| 4/15/2010 08:51:01 | 25.234 5/13/2010 13:34:00 | 25.0 4/16/2010 06:49:01 | 26.324 |
| 4/15/2010 09:11:01 | 25.234 5/13/2010 14:09:00 | 25.0 4/16/2010 07:09:01 | 26.324 |
| 4/15/2010 09:31:01 | 25.234 5/13/2010 14:44:00 | 25.0 4/16/2010 07:29:01 | 26.324 |
| 4/15/2010 09:51:01 | 25.234 5/13/2010 15:19:00 | 25.0 4/16/2010 07:49:01 | 26.262 |
| 4/15/2010 10:11:01 | 25.234 5/13/2010 15:54:00 | 25.0 4/16/2010 08:09:01 | 26.262 |
| 4/15/2010 10:31:01 | 25.234 5/13/2010 16:29:00 | 25.0 4/16/2010 08:29:01 | 26.262 |
| 4/15/2010 10:51:01 | 25.234 5/13/2010 17:04:00 | 25.0 4/16/2010 08:49:01 | 26.262 |
| 4/15/2010 11:11:01 | 25.234 5/13/2010 17:39:00 | 25.5 4/16/2010 09:09:01 | 26.262 |
| 4/15/2010 11:31:01 | 25.234 5/13/2010 18:14:00 | 25.5 4/16/2010 09:29:01 | 26.262 |
| 4/15/2010 11:51:01 | 25.234 5/13/2010 18:49:00 | 25.5 4/16/2010 09:49:01 | 26.262 |
| 4/15/2010 12:11:01 | 25.234 5/13/2010 19:24:00 | 25.5 4/16/2010 10:09:01 | 26.262 |
| 4/15/2010 12:31:01 | 25.234 5/13/2010 19:59:00 | 25.5 4/16/2010 10:29:01 | 26.262 |
| 4/15/2010 12:51:01 | 25.234 5/13/2010 20:34:00 | 25.5 4/16/2010 10:49:01 | 26.262 |
| 4/15/2010 13:11:01 | 25.234 5/13/2010 21:09:00 | 25.5 4/16/2010 11:09:01 | 26.262 |
| 4/15/2010 13:31:01 | 25.172 5/13/2010 21:44:00 | 25.5 4/16/2010 11:29:01 | 26.262 |
| 4/15/2010 13:51:01 | 25.172 5/13/2010 22:19:00 | 25.5 4/16/2010 11:49:01 | 26.199 |
| 4/15/2010 14:11:01 | 25.172 5/13/2010 22:54:00 | 25.5 4/16/2010 12:09:01 | 26.262 |
| 4/15/2010 14:31:01 | 25.172 5/13/2010 23:29:00 | 25.0 4/16/2010 12:29:01 | 26.199 |
| 4/15/2010 14:51:01 | 25.172 5/14/2010 00:04:00 | 25.0 4/16/2010 12:49:01 | 26.199 |
| 4/15/2010 15:11:01 | 25.172 5/14/2010 00:39:00 | 25.0 4/16/2010 13:09:01 | 26.199 |
| 4/15/2010 15:31:01 | 25.172 5/14/2010 01:14:00 | 25.0 4/16/2010 13:29:01 | 26.199 |
| 4/15/2010 15:51:01 | 25.172 5/14/2010 01:49:00 | 25.0 4/16/2010 13:49:01 | 26.199 |
| 4/15/2010 16:11:01 | 25.172 5/14/2010 02:24:00 | 25.0 4/16/2010 14:09:01 | 26.199 |

|                    |                           |                         |        |
|--------------------|---------------------------|-------------------------|--------|
| 4/15/2010 16:31:01 | 25.172 5/14/2010 02:59:00 | 25.0 4/16/2010 14:29:01 | 26.199 |
| 4/15/2010 16:51:01 | 25.172 5/14/2010 03:34:00 | 25.0 4/16/2010 14:49:01 | 26.199 |
| 4/15/2010 17:11:01 | 25.172 5/14/2010 04:09:00 | 25.0 4/16/2010 15:09:01 | 26.199 |
| 4/15/2010 17:31:01 | 25.172 5/14/2010 04:44:00 | 25.0 4/16/2010 15:29:01 | 26.199 |
| 4/15/2010 17:51:01 | 25.172 5/14/2010 05:19:00 | 25.0 4/16/2010 15:49:01 | 26.199 |
| 4/15/2010 18:11:01 | 25.172 5/14/2010 05:54:00 | 25.0 4/16/2010 16:09:01 | 26.199 |
| 4/15/2010 18:31:01 | 25.172 5/14/2010 06:29:00 | 25.0 4/16/2010 16:29:01 | 26.199 |
| 4/15/2010 18:51:01 | 25.172 5/14/2010 07:04:00 | 24.5 4/16/2010 16:49:01 | 26.199 |
| 4/15/2010 19:11:01 | 25.172 5/14/2010 07:39:00 | 24.5 4/16/2010 17:09:01 | 26.199 |
| 4/15/2010 19:31:01 | 25.172 5/14/2010 08:14:00 | 24.5 4/16/2010 17:29:01 | 26.199 |
| 4/15/2010 19:51:01 | 25.172 5/14/2010 08:49:00 | 24.5 4/16/2010 17:49:01 | 26.199 |
| 4/15/2010 20:11:01 | 25.172 5/14/2010 09:24:00 | 24.5 4/16/2010 18:09:01 | 26.199 |
| 4/15/2010 20:31:01 | 25.172 5/14/2010 09:59:00 | 24.5 4/16/2010 18:29:01 | 26.199 |
| 4/15/2010 20:51:01 | 25.172 5/14/2010 10:34:00 | 24.5 4/16/2010 18:49:01 | 26.199 |
| 4/15/2010 21:11:01 | 25.172 5/14/2010 11:09:00 | 24.5 4/16/2010 19:09:01 | 26.199 |
| 4/15/2010 21:31:01 | 25.172 5/14/2010 11:44:00 | 24.5 4/16/2010 19:29:01 | 26.199 |
| 4/15/2010 21:51:01 | 25.172 5/14/2010 12:19:00 | 24.5 4/16/2010 19:49:01 | 26.199 |
| 4/15/2010 22:11:01 | 25.172 5/14/2010 12:54:00 | 24.5 4/16/2010 20:09:01 | 26.199 |
| 4/15/2010 22:31:01 | 25.172 5/14/2010 13:29:00 | 24.5 4/16/2010 20:29:01 | 26.199 |
| 4/15/2010 22:51:01 | 25.172 5/14/2010 14:04:00 | 25.0 4/16/2010 20:49:01 | 26.199 |
| 4/15/2010 23:11:01 | 25.172 5/14/2010 14:39:00 | 25.0 4/16/2010 21:09:01 | 26.199 |
| 4/15/2010 23:31:01 | 25.172 5/14/2010 15:14:00 | 25.0 4/16/2010 21:29:01 | 26.199 |
| 4/15/2010 23:51:01 | 25.172 5/14/2010 15:49:00 | 25.0 4/16/2010 21:49:01 | 26.199 |
| 4/16/2010 00:11:01 | 25.172 5/14/2010 16:24:00 | 25.0 4/16/2010 22:09:01 | 26.199 |
| 4/16/2010 00:31:01 | 25.172 5/14/2010 16:59:00 | 25.0 4/16/2010 22:29:01 | 26.199 |
| 4/16/2010 00:51:01 | 25.172 5/14/2010 17:34:00 | 25.0 4/16/2010 22:49:01 | 26.262 |
| 4/16/2010 01:11:01 | 25.172 5/14/2010 18:09:00 | 25.0 4/16/2010 23:09:01 | 26.199 |
| 4/16/2010 01:31:01 | 25.172 5/14/2010 18:44:00 | 25.0 4/16/2010 23:29:01 | 26.262 |
| 4/16/2010 01:51:01 | 25.172 5/14/2010 19:19:00 | 25.0 4/16/2010 23:49:01 | 26.262 |
| 4/16/2010 02:11:01 | 25.172 5/14/2010 19:54:00 | 25.0 4/17/2010 00:09:01 | 26.262 |
| 4/16/2010 02:31:01 | 25.172 5/14/2010 20:29:00 | 25.0 4/17/2010 00:29:01 | 26.262 |
| 4/16/2010 02:51:01 | 25.172 5/14/2010 21:04:00 | 25.0 4/17/2010 00:49:01 | 26.262 |
| 4/16/2010 03:11:01 | 25.172 5/14/2010 21:39:00 | 25.0 4/17/2010 01:09:01 | 26.262 |
| 4/16/2010 03:31:01 | 25.172 5/14/2010 22:14:00 | 25.0 4/17/2010 01:29:01 | 26.262 |
| 4/16/2010 03:51:01 | 25.172 5/14/2010 22:49:00 | 25.0 4/17/2010 01:49:01 | 26.262 |
| 4/16/2010 04:11:01 | 25.172 5/14/2010 23:24:00 | 25.0 4/17/2010 02:09:01 | 26.262 |
| 4/16/2010 04:31:01 | 25.172 5/14/2010 23:59:00 | 25.0 4/17/2010 02:29:01 | 26.262 |
| 4/16/2010 04:51:01 | 25.172 5/15/2010 00:34:00 | 25.0 4/17/2010 02:49:01 | 26.262 |
| 4/16/2010 05:11:01 | 25.172 5/15/2010 01:09:00 | 25.0 4/17/2010 03:09:01 | 26.262 |
| 4/16/2010 05:31:01 | 25.172 5/15/2010 01:44:00 | 25.0 4/17/2010 03:29:01 | 26.262 |
| 4/16/2010 05:51:01 | 25.172 5/15/2010 02:19:00 | 25.0 4/17/2010 03:49:01 | 26.262 |
| 4/16/2010 06:11:01 | 25.172 5/15/2010 02:54:00 | 25.0 4/17/2010 04:09:01 | 26.262 |
| 4/16/2010 06:31:01 | 25.172 5/15/2010 03:29:00 | 25.0 4/17/2010 04:29:01 | 26.262 |
| 4/16/2010 06:51:01 | 25.172 5/15/2010 04:04:00 | 25.0 4/17/2010 04:49:01 | 26.262 |
| 4/16/2010 07:11:01 | 25.172 5/15/2010 04:39:00 | 25.0 4/17/2010 05:09:01 | 26.262 |
| 4/16/2010 07:31:01 | 25.172 5/15/2010 05:14:00 | 25.0 4/17/2010 05:29:01 | 26.262 |
| 4/16/2010 07:51:01 | 25.172 5/15/2010 05:49:00 | 25.0 4/17/2010 05:49:01 | 26.262 |
| 4/16/2010 08:11:01 | 25.172 5/15/2010 06:24:00 | 25.0 4/17/2010 06:09:01 | 26.262 |
| 4/16/2010 08:31:01 | 25.172 5/15/2010 06:59:00 | 25.0 4/17/2010 06:29:01 | 26.262 |
| 4/16/2010 08:51:01 | 25.109 5/15/2010 07:34:00 | 25.0 4/17/2010 06:49:01 | 26.262 |

|                    |        |                    |      |                    |        |
|--------------------|--------|--------------------|------|--------------------|--------|
| 4/16/2010 09:11:01 | 25.109 | 5/15/2010 08:09:00 | 25.0 | 4/17/2010 07:09:01 | 26.262 |
| 4/16/2010 09:31:01 | 25.109 | 5/15/2010 08:44:00 | 24.5 | 4/17/2010 07:29:01 | 26.262 |
| 4/16/2010 09:51:01 | 25.109 | 5/15/2010 09:19:00 | 24.5 | 4/17/2010 07:49:01 | 26.262 |
| 4/16/2010 10:11:01 | 25.109 | 5/15/2010 09:54:00 | 24.5 | 4/17/2010 08:09:01 | 26.262 |
| 4/16/2010 10:31:01 | 25.109 | 5/15/2010 10:29:00 | 24.5 | 4/17/2010 08:29:01 | 26.262 |
| 4/16/2010 10:51:01 | 25.109 | 5/15/2010 11:04:00 | 24.5 | 4/17/2010 08:49:01 | 26.262 |
| 4/16/2010 11:11:01 | 25.109 | 5/15/2010 11:39:00 | 24.5 | 4/17/2010 09:09:01 | 26.262 |
| 4/16/2010 11:31:01 | 25.109 | 5/15/2010 12:14:00 | 24.5 | 4/17/2010 09:29:01 | 26.262 |
| 4/16/2010 11:51:01 | 25.047 | 5/15/2010 12:49:00 | 24.5 | 4/17/2010 09:49:01 | 26.262 |
| 4/16/2010 12:11:01 | 25.109 | 5/15/2010 13:24:00 | 24.5 | 4/17/2010 10:09:01 | 26.262 |
| 4/16/2010 12:31:01 | 25.047 | 5/15/2010 13:59:00 | 24.5 | 4/17/2010 10:29:01 | 26.199 |
| 4/16/2010 12:51:01 | 25.047 | 5/15/2010 14:34:00 | 24.5 | 4/17/2010 10:49:01 | 26.199 |
| 4/16/2010 13:11:01 | 25.047 | 5/15/2010 15:09:00 | 24.5 | 4/17/2010 11:09:01 | 26.199 |
| 4/16/2010 13:31:01 | 25.047 | 5/15/2010 15:44:00 | 24.5 | 4/17/2010 11:29:01 | 26.199 |
| 4/16/2010 13:51:01 | 25.047 | 5/15/2010 16:19:00 | 24.5 | 4/17/2010 11:49:01 | 26.199 |
| 4/16/2010 14:11:01 | 25.047 | 5/15/2010 16:54:00 | 25.0 | 4/17/2010 12:09:01 | 26.199 |
| 4/16/2010 14:31:01 | 25.047 | 5/15/2010 17:29:00 | 25.0 | 4/17/2010 12:29:01 | 26.199 |
| 4/16/2010 14:51:01 | 25.047 | 5/15/2010 18:04:00 | 25.0 | 4/17/2010 12:49:01 | 26.199 |
| 4/16/2010 15:11:01 | 25.047 | 5/15/2010 18:39:00 | 25.0 | 4/17/2010 13:09:01 | 26.199 |
| 4/16/2010 15:31:01 | 25.047 | 5/15/2010 19:14:00 | 25.0 | 4/17/2010 13:29:01 | 26.199 |
| 4/16/2010 15:51:01 | 25.047 | 5/15/2010 19:49:00 | 25.0 | 4/17/2010 13:49:01 | 26.199 |
| 4/16/2010 16:11:01 | 25.047 | 5/15/2010 20:24:00 | 25.0 | 4/17/2010 14:09:01 | 26.199 |
| 4/16/2010 16:31:01 | 24.984 | 5/15/2010 20:59:00 | 25.0 | 4/17/2010 14:29:01 | 26.199 |
| 4/16/2010 16:51:01 | 25.047 | 5/15/2010 21:34:00 | 25.0 | 4/17/2010 14:49:01 | 26.199 |
| 4/16/2010 17:11:01 | 24.984 | 5/15/2010 22:09:00 | 25.0 | 4/17/2010 15:09:01 | 26.199 |
| 4/16/2010 17:31:01 | 25.047 | 5/15/2010 22:44:00 | 25.0 | 4/17/2010 15:29:01 | 26.199 |
| 4/16/2010 17:51:01 | 24.984 | 5/15/2010 23:19:00 | 25.0 | 4/17/2010 15:49:01 | 26.199 |
| 4/16/2010 18:11:01 | 24.984 | 5/15/2010 23:54:00 | 25.0 | 4/17/2010 16:09:01 | 26.199 |
| 4/16/2010 18:31:01 | 24.984 | 5/16/2010 00:29:00 | 25.0 | 4/17/2010 16:29:01 | 26.199 |
| 4/16/2010 18:51:01 | 24.984 | 5/16/2010 01:04:00 | 25.0 | 4/17/2010 16:49:01 | 26.137 |
| 4/16/2010 19:11:01 | 24.984 | 5/16/2010 01:39:00 | 25.0 | 4/17/2010 17:09:01 | 26.199 |
| 4/16/2010 19:31:01 | 24.984 | 5/16/2010 02:14:00 | 24.5 | 4/17/2010 17:29:01 | 26.137 |
| 4/16/2010 19:51:01 | 24.984 | 5/16/2010 02:49:00 | 24.5 | 4/17/2010 17:49:01 | 26.199 |
| 4/16/2010 20:11:01 | 25.047 | 5/16/2010 03:24:00 | 24.5 | 4/17/2010 18:09:01 | 26.199 |
| 4/16/2010 20:31:01 | 25.047 | 5/16/2010 03:59:00 | 24.5 | 4/17/2010 18:29:01 | 26.199 |
| 4/16/2010 20:51:01 | 25.047 | 5/16/2010 04:34:00 | 24.5 | 4/17/2010 18:49:01 | 26.199 |
| 4/16/2010 21:11:01 | 25.047 | 5/16/2010 05:09:00 | 24.5 | 4/17/2010 19:09:01 | 26.199 |
| 4/16/2010 21:31:01 | 25.047 | 5/16/2010 05:44:00 | 24.5 | 4/17/2010 19:29:01 | 26.199 |
| 4/16/2010 21:51:01 | 25.047 | 5/16/2010 06:19:00 | 24.5 | 4/17/2010 19:49:01 | 26.199 |
| 4/16/2010 22:11:01 | 25.047 | 5/16/2010 06:54:00 | 24.5 | 4/17/2010 20:09:01 | 26.199 |
| 4/16/2010 22:31:01 | 25.047 | 5/16/2010 07:29:00 | 24.5 | 4/17/2010 20:29:01 | 26.199 |
| 4/16/2010 22:51:01 | 25.047 | 5/16/2010 08:04:00 | 24.5 | 4/17/2010 20:49:01 | 26.199 |
| 4/16/2010 23:11:01 | 25.047 | 5/16/2010 08:39:00 | 24.0 | 4/17/2010 21:09:01 | 26.199 |
| 4/16/2010 23:31:01 | 25.047 | 5/16/2010 09:14:00 | 24.0 | 4/17/2010 21:29:01 | 26.199 |
| 4/16/2010 23:51:01 | 25.047 | 5/16/2010 09:49:00 | 24.0 | 4/17/2010 21:49:01 | 26.199 |
| 4/17/2010 00:11:01 | 25.047 | 5/16/2010 10:24:00 | 24.0 | 4/17/2010 22:09:01 | 26.199 |
| 4/17/2010 00:31:01 | 25.047 | 5/16/2010 10:59:00 | 24.0 | 4/17/2010 22:29:01 | 26.199 |
| 4/17/2010 00:51:01 | 25.047 | 5/16/2010 11:34:00 | 24.0 | 4/17/2010 22:49:01 | 26.199 |
| 4/17/2010 01:11:01 | 25.047 | 5/16/2010 12:09:00 | 24.0 | 4/17/2010 23:09:01 | 26.199 |
| 4/17/2010 01:31:01 | 25.047 | 5/16/2010 12:44:00 | 24.0 | 4/17/2010 23:29:01 | 26.262 |

|                    |                           |                         |        |
|--------------------|---------------------------|-------------------------|--------|
| 4/17/2010 01:51:01 | 25.047 5/16/2010 13:19:00 | 24.5 4/17/2010 23:49:01 | 26.262 |
| 4/17/2010 02:11:01 | 25.047 5/16/2010 13:54:00 | 24.5 4/18/2010 00:09:01 | 26.262 |
| 4/17/2010 02:31:01 | 25.047 5/16/2010 14:29:00 | 24.5 4/18/2010 00:29:01 | 26.262 |
| 4/17/2010 02:51:01 | 25.047 5/16/2010 15:04:00 | 24.5 4/18/2010 00:49:01 | 26.262 |
| 4/17/2010 03:11:01 | 25.047 5/16/2010 15:39:00 | 24.5 4/18/2010 01:09:01 | 26.262 |
| 4/17/2010 03:31:01 | 25.047 5/16/2010 16:14:00 | 24.5 4/18/2010 01:29:01 | 26.262 |
| 4/17/2010 03:51:01 | 25.047 5/16/2010 16:49:00 | 24.5 4/18/2010 01:49:01 | 26.262 |
| 4/17/2010 04:11:01 | 25.047 5/16/2010 17:24:00 | 24.5 4/18/2010 02:09:01 | 26.262 |
| 4/17/2010 04:31:01 | 25.047 5/16/2010 17:59:00 | 24.5 4/18/2010 02:29:01 | 26.262 |
| 4/17/2010 04:51:01 | 25.047 5/16/2010 18:34:00 | 24.5 4/18/2010 02:49:01 | 26.262 |
| 4/17/2010 05:11:01 | 25.047 5/16/2010 19:09:00 | 24.5 4/18/2010 03:09:01 | 26.262 |
| 4/17/2010 05:31:01 | 25.047 5/16/2010 19:44:00 | 24.5 4/18/2010 03:29:01 | 26.262 |
| 4/17/2010 05:51:01 | 25.047 5/16/2010 20:19:00 | 24.5 4/18/2010 03:49:01 | 26.262 |
| 4/17/2010 06:11:01 | 25.047 5/16/2010 20:54:00 | 24.5 4/18/2010 04:09:01 | 26.262 |
| 4/17/2010 06:31:01 | 25.047 5/16/2010 21:29:00 | 24.5 4/18/2010 04:29:01 | 26.262 |
| 4/17/2010 06:51:01 | 25.047 5/16/2010 22:04:00 | 24.5 4/18/2010 04:49:01 | 26.262 |
| 4/17/2010 07:11:01 | 25.047 5/16/2010 22:39:00 | 24.5 4/18/2010 05:09:01 | 26.262 |
| 4/17/2010 07:31:01 | 25.047 5/16/2010 23:14:00 | 24.5 4/18/2010 05:29:01 | 26.262 |
| 4/17/2010 07:51:01 | 25.047 5/16/2010 23:49:00 | 24.5 4/18/2010 05:49:01 | 26.262 |
| 4/17/2010 08:11:01 | 25.047 5/17/2010 00:24:00 | 24.5 4/18/2010 06:09:01 | 26.262 |
| 4/17/2010 08:31:01 | 25.047 5/17/2010 00:59:00 | 24.5 4/18/2010 06:29:01 | 26.262 |
| 4/17/2010 08:51:01 | 25.047 5/17/2010 01:34:00 | 24.5 4/18/2010 06:49:01 | 26.262 |
| 4/17/2010 09:11:01 | 25.047 5/17/2010 02:09:00 | 24.5 4/18/2010 07:09:01 | 26.262 |
| 4/17/2010 09:31:01 | 24.984 5/17/2010 02:44:00 | 24.0 4/18/2010 07:29:01 | 26.262 |
| 4/17/2010 09:51:01 | 24.984 5/17/2010 03:19:00 | 24.0 4/18/2010 07:49:01 | 26.262 |
| 4/17/2010 10:11:01 | 24.984 5/17/2010 03:54:00 | 24.0 4/18/2010 08:09:01 | 26.262 |
| 4/17/2010 10:31:01 | 24.984 5/17/2010 04:29:00 | 24.0 4/18/2010 08:29:01 | 26.262 |
| 4/17/2010 10:51:01 | 24.984 5/17/2010 05:04:00 | 24.0 4/18/2010 08:49:01 | 26.262 |
| 4/17/2010 11:11:01 | 24.984 5/17/2010 05:39:00 | 24.0 4/18/2010 09:09:01 | 26.262 |
| 4/17/2010 11:31:01 | 24.984 5/17/2010 06:14:00 | 24.0 4/18/2010 09:29:01 | 26.262 |
| 4/17/2010 11:51:01 | 24.984 5/17/2010 06:49:00 | 24.0 4/18/2010 09:49:01 | 26.262 |
| 4/17/2010 12:11:01 | 24.984 5/17/2010 07:24:00 | 24.0 4/18/2010 10:09:01 | 26.262 |
| 4/17/2010 12:31:01 | 24.984 5/17/2010 07:59:00 | 24.0 4/18/2010 10:29:01 | 26.262 |
| 4/17/2010 12:51:01 | 24.984 5/17/2010 08:34:00 | 24.0 4/18/2010 10:49:01 | 26.262 |
| 4/17/2010 13:11:01 | 24.984 5/17/2010 09:09:00 | 24.0 4/18/2010 11:09:01 | 26.262 |
| 4/17/2010 13:31:01 | 24.984 5/17/2010 09:44:00 | 24.0 4/18/2010 11:29:01 | 26.262 |
| 4/17/2010 13:51:01 | 24.922 5/17/2010 10:19:00 | 24.0 4/18/2010 11:49:01 | 26.262 |
| 4/17/2010 14:11:01 | 24.984 5/17/2010 10:54:00 | 24.0 4/18/2010 12:09:01 | 26.262 |
| 4/17/2010 14:31:01 | 24.922 5/17/2010 11:29:00 | 24.0 4/18/2010 12:29:01 | 26.262 |
| 4/17/2010 14:51:01 | 24.922 5/17/2010 12:04:00 | 24.0 4/18/2010 12:49:01 | 26.262 |
| 4/17/2010 15:11:01 | 24.922 5/17/2010 12:39:00 | 24.0 4/18/2010 13:09:01 | 26.262 |
| 4/17/2010 15:31:01 | 24.922 5/17/2010 13:14:00 | 24.0 4/18/2010 13:29:01 | 26.262 |
| 4/17/2010 15:51:01 | 24.922 5/17/2010 13:49:00 | 24.0 4/18/2010 13:49:01 | 26.262 |
| 4/17/2010 16:11:01 | 24.922 5/17/2010 14:24:00 | 24.0 4/18/2010 14:09:01 | 26.262 |
| 4/17/2010 16:31:01 | 24.922 5/17/2010 14:59:00 | 24.0 4/18/2010 14:29:01 | 26.262 |
| 4/17/2010 16:51:01 | 24.922 5/17/2010 15:34:00 | 24.0 4/18/2010 14:49:01 | 26.262 |
| 4/17/2010 17:11:01 | 24.922 5/17/2010 16:09:00 | 24.0 4/18/2010 15:09:01 | 26.262 |
| 4/17/2010 17:31:01 | 24.922 5/17/2010 16:44:00 | 24.0 4/18/2010 15:29:01 | 26.262 |
| 4/17/2010 17:51:01 | 24.922 5/17/2010 17:19:00 | 24.5 4/18/2010 15:49:01 | 26.262 |
| 4/17/2010 18:11:01 | 24.922 5/17/2010 17:54:00 | 24.5 4/18/2010 16:09:01 | 26.262 |

|                    |        |                    |      |                    |        |
|--------------------|--------|--------------------|------|--------------------|--------|
| 4/17/2010 18:31:01 | 24.922 | 5/17/2010 18:29:00 | 24.5 | 4/18/2010 16:29:01 | 26.262 |
| 4/17/2010 18:51:01 | 24.922 | 5/17/2010 19:04:00 | 24.5 | 4/18/2010 16:49:01 | 26.262 |
| 4/17/2010 19:11:01 | 24.922 | 5/17/2010 19:39:00 | 24.5 | 4/18/2010 17:09:01 | 26.262 |
| 4/17/2010 19:31:01 | 24.922 | 5/17/2010 20:14:00 | 24.5 | 4/18/2010 17:29:01 | 26.262 |
| 4/17/2010 19:51:01 | 24.922 | 5/17/2010 20:49:00 | 24.5 | 4/18/2010 17:49:01 | 26.262 |
| 4/17/2010 20:11:01 | 24.922 | 5/17/2010 21:24:00 | 24.5 | 4/18/2010 18:09:01 | 26.262 |
| 4/17/2010 20:31:01 | 24.922 | 5/17/2010 21:59:00 | 24.5 | 4/18/2010 18:29:01 | 26.262 |
| 4/17/2010 20:51:01 | 24.922 | 5/17/2010 22:34:00 | 24.5 | 4/18/2010 18:49:01 | 26.262 |
| 4/17/2010 21:11:01 | 24.984 | 5/17/2010 23:09:00 | 24.5 | 4/18/2010 19:09:01 | 26.262 |
| 4/17/2010 21:31:01 | 24.984 | 5/17/2010 23:44:00 | 24.5 | 4/18/2010 19:29:01 | 26.262 |
| 4/17/2010 21:51:01 | 24.984 | 5/18/2010 00:19:00 | 24.5 | 4/18/2010 19:49:01 | 26.262 |
| 4/17/2010 22:11:01 | 24.984 | 5/18/2010 00:54:00 | 24.5 | 4/18/2010 20:09:01 | 26.262 |
| 4/17/2010 22:31:01 | 24.984 | 5/18/2010 01:29:00 | 24.5 | 4/18/2010 20:29:01 | 26.262 |
| 4/17/2010 22:51:01 | 24.984 | 5/18/2010 02:04:00 | 24.5 | 4/18/2010 20:49:01 | 26.262 |
| 4/17/2010 23:11:01 | 24.984 | 5/18/2010 02:39:00 | 24.5 | 4/18/2010 21:09:01 | 26.262 |
| 4/17/2010 23:31:01 | 24.984 | 5/18/2010 03:14:00 | 24.5 | 4/18/2010 21:29:01 | 26.262 |
| 4/17/2010 23:51:01 | 24.984 | 5/18/2010 03:49:00 | 24.5 | 4/18/2010 21:49:01 | 26.262 |
| 4/18/2010 00:11:01 | 24.984 | 5/18/2010 04:24:00 | 24.5 | 4/18/2010 22:09:01 | 26.262 |
| 4/18/2010 00:31:01 | 24.984 | 5/18/2010 04:59:00 | 24.5 | 4/18/2010 22:29:01 | 26.262 |
| 4/18/2010 00:51:01 | 24.984 | 5/18/2010 05:34:00 | 24.5 | 4/18/2010 22:49:01 | 26.262 |
| 4/18/2010 01:11:01 | 24.984 | 5/18/2010 06:09:00 | 24.5 | 4/18/2010 23:09:01 | 26.324 |
| 4/18/2010 01:31:01 | 24.984 | 5/18/2010 06:44:00 | 24.5 | 4/18/2010 23:29:01 | 26.324 |
| 4/18/2010 01:51:01 | 24.984 | 5/18/2010 07:19:00 | 24.5 | 4/18/2010 23:49:01 | 26.324 |
| 4/18/2010 02:11:01 | 24.984 | 5/18/2010 07:54:00 | 24.5 | 4/19/2010 00:09:01 | 26.324 |
| 4/18/2010 02:31:01 | 24.984 | 5/18/2010 08:29:00 | 24.0 | 4/19/2010 00:29:01 | 26.324 |
| 4/18/2010 02:51:01 | 24.984 | 5/18/2010 09:04:00 | 24.0 | 4/19/2010 00:49:01 | 26.324 |
| 4/18/2010 03:11:01 | 24.984 | 5/18/2010 09:39:00 | 24.0 | 4/19/2010 01:09:01 | 26.324 |
| 4/18/2010 03:31:01 | 24.984 | 5/18/2010 10:14:00 | 24.0 | 4/19/2010 01:29:01 | 26.324 |
| 4/18/2010 03:51:01 | 24.984 | 5/18/2010 10:49:00 | 24.0 | 4/19/2010 01:49:01 | 26.324 |
| 4/18/2010 04:11:01 | 24.984 | 5/18/2010 11:24:00 | 24.0 | 4/19/2010 02:09:01 | 26.324 |
| 4/18/2010 04:31:01 | 24.984 | 5/18/2010 11:59:00 | 24.0 | 4/19/2010 02:29:01 | 26.324 |
| 4/18/2010 04:51:01 | 24.984 | 5/18/2010 12:34:00 | 24.5 | 4/19/2010 02:49:01 | 26.324 |
| 4/18/2010 05:11:01 | 24.984 | 5/18/2010 13:09:00 | 24.5 | 4/19/2010 03:09:01 | 26.324 |
| 4/18/2010 05:31:01 | 24.984 | 5/18/2010 13:44:00 | 24.5 | 4/19/2010 03:29:01 | 26.387 |
| 4/18/2010 05:51:01 | 24.984 | 5/18/2010 14:19:00 | 24.5 | 4/19/2010 03:49:01 | 26.387 |
| 4/18/2010 06:11:01 | 24.984 | 5/18/2010 14:54:00 | 24.5 | 4/19/2010 04:09:01 | 26.387 |
| 4/18/2010 06:31:01 | 24.984 | 5/18/2010 15:29:00 | 24.5 | 4/19/2010 04:29:01 | 26.387 |
| 4/18/2010 06:51:01 | 24.984 | 5/18/2010 16:04:00 | 24.5 | 4/19/2010 04:49:01 | 26.387 |
| 4/18/2010 07:11:01 | 24.984 | 5/18/2010 16:39:00 | 24.5 | 4/19/2010 05:09:01 | 26.387 |
| 4/18/2010 07:31:01 | 24.984 | 5/18/2010 17:14:00 | 24.5 | 4/19/2010 05:29:01 | 26.324 |
| 4/18/2010 07:51:01 | 24.984 | 5/18/2010 17:49:00 | 24.5 | 4/19/2010 05:49:01 | 26.387 |
| 4/18/2010 08:11:01 | 24.984 | 5/18/2010 18:24:00 | 25.0 | 4/19/2010 06:09:01 | 26.387 |
| 4/18/2010 08:31:01 | 24.984 | 5/18/2010 18:59:00 | 25.0 | 4/19/2010 06:29:01 | 26.387 |
| 4/18/2010 08:51:01 | 24.984 | 5/18/2010 19:34:00 | 25.0 | 4/19/2010 06:49:01 | 26.387 |
| 4/18/2010 09:11:01 | 24.984 | 5/18/2010 20:09:00 | 25.0 | 4/19/2010 07:09:01 | 26.387 |
| 4/18/2010 09:31:01 | 24.984 | 5/18/2010 20:44:00 | 25.0 | 4/19/2010 07:29:01 | 26.387 |
| 4/18/2010 09:51:01 | 24.984 | 5/18/2010 21:19:00 | 25.0 | 4/19/2010 07:49:01 | 26.387 |
| 4/18/2010 10:11:01 | 24.984 | 5/18/2010 21:54:00 | 25.0 | 4/19/2010 08:09:01 | 26.387 |
| 4/18/2010 10:31:01 | 24.984 | 5/18/2010 22:29:00 | 25.0 | 4/19/2010 08:29:01 | 26.387 |
| 4/18/2010 10:51:01 | 24.984 | 5/18/2010 23:04:00 | 25.0 | 4/19/2010 08:49:01 | 26.387 |

|                    |        |                    |      |                    |        |
|--------------------|--------|--------------------|------|--------------------|--------|
| 4/18/2010 11:11:01 | 24.984 | 5/18/2010 23:39:00 | 25.0 | 4/19/2010 09:09:01 | 26.387 |
| 4/18/2010 11:31:01 | 24.984 | 5/19/2010 00:14:00 | 25.0 | 4/19/2010 09:29:01 | 26.324 |
| 4/18/2010 11:51:01 | 24.984 | 5/19/2010 00:49:00 | 25.0 | 4/19/2010 09:49:01 | 26.324 |
| 4/18/2010 12:11:01 | 24.984 | 5/19/2010 01:24:00 | 25.0 | 4/19/2010 10:09:01 | 26.324 |
| 4/18/2010 12:31:01 | 24.984 | 5/19/2010 01:59:00 | 25.0 | 4/19/2010 10:29:01 | 26.324 |
| 4/18/2010 12:51:01 | 24.984 | 5/19/2010 02:34:00 | 25.0 | 4/19/2010 10:49:01 | 26.324 |
| 4/18/2010 13:11:01 | 24.984 | 5/19/2010 03:09:00 | 25.0 | 4/19/2010 11:09:01 | 26.324 |
| 4/18/2010 13:31:01 | 24.984 | 5/19/2010 03:44:00 | 25.0 | 4/19/2010 11:29:01 | 26.324 |
| 4/18/2010 13:51:01 | 24.984 | 5/19/2010 04:19:00 | 25.0 | 4/19/2010 11:49:01 | 26.324 |
| 4/18/2010 14:11:01 | 24.984 | 5/19/2010 04:54:00 | 25.0 | 4/19/2010 12:09:01 | 26.324 |
| 4/18/2010 14:31:01 | 24.984 | 5/19/2010 05:29:00 | 25.0 | 4/19/2010 12:29:01 | 26.324 |
| 4/18/2010 14:51:01 | 24.984 | 5/19/2010 06:04:00 | 25.0 | 4/19/2010 12:49:01 | 26.324 |
| 4/18/2010 15:11:01 | 24.984 | 5/19/2010 06:39:00 | 25.0 | 4/19/2010 13:09:01 | 26.324 |
| 4/18/2010 15:31:01 | 24.922 | 5/19/2010 07:14:00 | 24.5 | 4/19/2010 13:29:01 | 26.324 |
| 4/18/2010 15:51:01 | 24.922 | 5/19/2010 07:49:00 | 24.5 | 4/19/2010 13:49:01 | 26.324 |
| 4/18/2010 16:11:01 | 24.922 | 5/19/2010 08:24:00 | 24.5 | 4/19/2010 14:09:01 | 26.324 |
| 4/18/2010 16:31:01 | 24.922 | 5/19/2010 08:59:00 | 24.5 | 4/19/2010 14:29:01 | 26.324 |
| 4/18/2010 16:51:01 | 24.922 | 5/19/2010 09:34:00 | 24.5 | 4/19/2010 14:49:01 | 26.324 |
| 4/18/2010 17:11:01 | 24.922 | 5/19/2010 10:09:00 | 24.5 | 4/19/2010 15:09:01 | 26.324 |
| 4/18/2010 17:31:01 | 24.984 | 5/19/2010 10:44:00 | 24.5 | 4/19/2010 15:29:01 | 26.324 |
| 4/18/2010 17:51:01 | 24.984 | 5/19/2010 11:19:00 | 24.5 | 4/19/2010 15:49:01 | 26.324 |
| 4/18/2010 18:11:01 | 24.984 | 5/19/2010 11:54:00 | 24.5 | 4/19/2010 16:09:01 | 26.324 |
| 4/18/2010 18:31:01 | 24.984 | 5/19/2010 12:29:00 | 24.5 | 4/19/2010 16:29:01 | 26.324 |
| 4/18/2010 18:51:01 | 24.984 | 5/19/2010 13:04:00 | 24.5 | 4/19/2010 16:49:01 | 26.324 |
| 4/18/2010 19:11:01 | 24.984 | 5/19/2010 13:39:00 | 24.5 | 4/19/2010 17:09:01 | 26.324 |
| 4/18/2010 19:31:01 | 24.984 | 5/19/2010 14:14:00 | 25.0 | 4/19/2010 17:29:01 | 26.324 |
| 4/18/2010 19:51:01 | 24.984 | 5/19/2010 14:49:00 | 25.0 | 4/19/2010 17:49:01 | 26.324 |
| 4/18/2010 20:11:01 | 24.984 | 5/19/2010 15:24:00 | 25.0 | 4/19/2010 18:09:01 | 26.324 |
| 4/18/2010 20:31:01 | 24.984 | 5/19/2010 15:59:00 | 25.0 | 4/19/2010 18:29:01 | 26.324 |
| 4/18/2010 20:51:01 | 24.984 | 5/19/2010 16:34:00 | 25.0 | 4/19/2010 18:49:01 | 26.324 |
| 4/18/2010 21:11:01 | 24.984 | 5/19/2010 17:09:00 | 25.0 | 4/19/2010 19:09:01 | 26.324 |
| 4/18/2010 21:31:01 | 24.984 | 5/19/2010 17:44:00 | 25.0 | 4/19/2010 19:29:01 | 26.324 |
| 4/18/2010 21:51:01 | 24.984 | 5/19/2010 18:19:00 | 25.0 | 4/19/2010 19:49:01 | 26.324 |
| 4/18/2010 22:11:01 | 24.984 | 5/19/2010 18:54:00 | 25.0 | 4/19/2010 20:09:01 | 26.324 |
| 4/18/2010 22:31:01 | 25.047 | 5/19/2010 19:29:00 | 25.0 | 4/19/2010 20:29:01 | 26.324 |
| 4/18/2010 22:51:01 | 25.047 | 5/19/2010 20:04:00 | 25.0 | 4/19/2010 20:49:01 | 26.324 |
| 4/18/2010 23:11:01 | 25.047 | 5/19/2010 20:39:00 | 25.0 | 4/19/2010 21:09:01 | 26.324 |
| 4/18/2010 23:31:01 | 25.047 | 5/19/2010 21:14:00 | 25.0 | 4/19/2010 21:29:01 | 26.324 |
| 4/18/2010 23:51:01 | 25.047 | 5/19/2010 21:49:00 | 25.0 | 4/19/2010 21:49:01 | 26.324 |
| 4/19/2010 00:11:01 | 25.047 | 5/19/2010 22:24:00 | 25.0 | 4/19/2010 22:09:01 | 26.387 |
| 4/19/2010 00:31:01 | 25.047 | 5/19/2010 22:59:00 | 25.0 | 4/19/2010 22:29:01 | 26.387 |
| 4/19/2010 00:51:01 | 25.047 | 5/19/2010 23:34:00 | 25.0 | 4/19/2010 22:49:01 | 26.387 |
| 4/19/2010 01:11:01 | 25.047 | 5/20/2010 00:09:00 | 25.0 | 4/19/2010 23:09:01 | 26.387 |
| 4/19/2010 01:31:01 | 25.047 | 5/20/2010 00:44:00 | 25.0 | 4/19/2010 23:29:01 | 26.387 |
| 4/19/2010 01:51:01 | 25.047 | 5/20/2010 01:19:00 | 25.0 | 4/19/2010 23:49:01 | 26.387 |
| 4/19/2010 02:11:01 | 25.047 | 5/20/2010 01:54:00 | 25.0 | 4/20/2010 00:09:01 | 26.387 |
| 4/19/2010 02:31:01 | 25.047 | 5/20/2010 02:29:00 | 25.0 | 4/20/2010 00:29:01 | 26.387 |
| 4/19/2010 02:51:01 | 25.047 | 5/20/2010 03:04:00 | 25.0 | 4/20/2010 00:49:01 | 26.387 |
| 4/19/2010 03:11:01 | 25.047 | 5/20/2010 03:39:00 | 25.0 | 4/20/2010 01:09:01 | 26.387 |
| 4/19/2010 03:31:01 | 25.047 | 5/20/2010 04:14:00 | 25.0 | 4/20/2010 01:29:01 | 26.387 |



|                    |        |                    |      |                    |        |
|--------------------|--------|--------------------|------|--------------------|--------|
| 4/19/2010 03:51:01 | 25.047 | 5/20/2010 04:49:00 | 25.0 | 4/20/2010 01:49:01 | 26.387 |
| 4/19/2010 04:11:01 | 25.047 | 5/20/2010 05:24:00 | 25.0 | 4/20/2010 02:09:01 | 26.449 |
| 4/19/2010 04:31:01 | 25.047 | 5/20/2010 05:59:00 | 25.0 | 4/20/2010 02:29:01 | 26.449 |
| 4/19/2010 04:51:01 | 25.047 | 5/20/2010 06:34:00 | 25.0 | 4/20/2010 02:49:01 | 26.449 |
| 4/19/2010 05:11:01 | 25.047 | 5/20/2010 07:09:00 | 25.0 | 4/20/2010 03:09:01 | 26.449 |
| 4/19/2010 05:31:01 | 25.047 | 5/20/2010 07:44:00 | 25.0 | 4/20/2010 03:29:01 | 26.449 |
| 4/19/2010 05:51:01 | 25.047 | 5/20/2010 08:19:00 | 25.0 | 4/20/2010 03:49:01 | 26.449 |
| 4/19/2010 06:11:01 | 25.047 | 5/20/2010 08:54:00 | 25.0 | 4/20/2010 04:09:01 | 26.449 |
| 4/19/2010 06:31:01 | 25.047 | 5/20/2010 09:29:00 | 25.0 | 4/20/2010 04:29:01 | 26.449 |
| 4/19/2010 06:51:01 | 25.047 | 5/20/2010 10:04:00 | 25.0 | 4/20/2010 04:49:01 | 26.449 |
| 4/19/2010 07:11:01 | 25.047 | 5/20/2010 10:39:00 | 25.0 | 4/20/2010 05:09:01 | 26.449 |
| 4/19/2010 07:31:01 | 25.047 | 5/20/2010 11:14:00 | 25.0 | 4/20/2010 05:29:01 | 26.449 |
| 4/19/2010 07:51:01 | 25.047 | 5/20/2010 11:49:00 | 25.0 | 4/20/2010 05:49:01 | 26.449 |
| 4/19/2010 08:11:01 | 25.047 | 5/20/2010 12:24:00 | 25.0 | 4/20/2010 06:09:01 | 26.449 |
| 4/19/2010 08:31:01 | 25.047 | 5/20/2010 12:59:00 | 25.0 | 4/20/2010 06:29:01 | 26.449 |
| 4/19/2010 08:51:01 | 25.047 | 5/20/2010 13:34:00 | 25.0 | 4/20/2010 06:49:01 | 26.449 |
| 4/19/2010 09:11:01 | 25.047 | 5/20/2010 14:09:00 | 25.0 | 4/20/2010 07:09:01 | 26.449 |
| 4/19/2010 09:31:01 | 25.047 | 5/20/2010 14:44:00 | 25.0 | 4/20/2010 07:29:01 | 26.449 |
| 4/19/2010 09:51:01 | 25.047 | 5/20/2010 15:19:00 | 25.0 | 4/20/2010 07:49:01 | 26.449 |
| 4/19/2010 10:11:01 | 25.047 | 5/20/2010 15:54:00 | 25.5 | 4/20/2010 08:09:01 | 26.449 |
| 4/19/2010 10:31:01 | 25.047 | 5/20/2010 16:29:00 | 25.5 | 4/20/2010 08:29:01 | 26.449 |
| 4/19/2010 10:51:01 | 25.047 | 5/20/2010 17:04:00 | 25.5 | 4/20/2010 08:49:01 | 26.449 |
| 4/19/2010 11:11:01 | 25.047 | 5/20/2010 17:39:00 | 25.5 | 4/20/2010 09:09:01 | 26.449 |
| 4/19/2010 11:31:01 | 25.047 | 5/20/2010 18:14:00 | 25.5 | 4/20/2010 09:29:01 | 26.449 |
| 4/19/2010 11:51:01 | 25.047 | 5/20/2010 18:49:00 | 25.5 | 4/20/2010 09:49:01 | 26.449 |
| 4/19/2010 12:11:01 | 25.047 | 5/20/2010 19:24:00 | 25.5 | 4/20/2010 10:09:01 | 26.449 |
| 4/19/2010 12:31:01 | 24.984 | 5/20/2010 19:59:00 | 25.5 | 4/20/2010 10:29:01 | 26.449 |
| 4/19/2010 12:51:01 | 25.047 | 5/20/2010 20:34:00 | 25.5 | 4/20/2010 10:49:01 | 26.449 |
| 4/19/2010 13:11:01 | 24.984 | 5/20/2010 21:09:00 | 25.5 | 4/20/2010 11:09:01 | 26.449 |
| 4/19/2010 13:31:01 | 24.984 | 5/20/2010 21:44:00 | 25.5 | 4/20/2010 11:29:01 | 26.449 |
| 4/19/2010 13:51:01 | 24.984 | 5/20/2010 22:19:00 | 25.5 | 4/20/2010 11:49:01 | 26.449 |
| 4/19/2010 14:11:01 | 24.984 | 5/20/2010 22:54:00 | 25.5 | 4/20/2010 12:09:01 | 26.449 |
| 4/19/2010 14:31:01 | 24.984 | 5/20/2010 23:29:00 | 25.5 | 4/20/2010 12:29:01 | 26.449 |
| 4/19/2010 14:51:01 | 24.984 | 5/21/2010 00:04:00 | 25.5 | 4/20/2010 12:49:01 | 26.449 |
| 4/19/2010 15:11:01 | 24.984 | 5/21/2010 00:39:00 | 25.5 | 4/20/2010 13:09:01 | 26.449 |
| 4/19/2010 15:31:01 | 24.984 | 5/21/2010 01:14:00 | 25.5 | 4/20/2010 13:29:01 | 26.449 |
| 4/19/2010 15:51:01 | 24.984 | 5/21/2010 01:49:00 | 25.5 | 4/20/2010 13:49:01 | 26.449 |
| 4/19/2010 16:11:01 | 24.984 | 5/21/2010 02:24:00 | 25.5 | 4/20/2010 14:09:01 | 26.449 |
| 4/19/2010 16:31:01 | 24.984 | 5/21/2010 02:59:00 | 25.5 | 4/20/2010 14:29:01 | 26.449 |
| 4/19/2010 16:51:01 | 24.984 | 5/21/2010 03:34:00 | 25.5 | 4/20/2010 14:49:01 | 26.449 |
| 4/19/2010 17:11:01 | 24.984 | 5/21/2010 04:09:00 | 25.5 | 4/20/2010 15:09:01 | 26.449 |
| 4/19/2010 17:31:01 | 24.984 | 5/21/2010 04:44:00 | 25.5 | 4/20/2010 15:29:01 | 26.449 |
| 4/19/2010 17:51:01 | 24.984 | 5/21/2010 05:19:00 | 25.0 | 4/20/2010 15:49:01 | 26.449 |
| 4/19/2010 18:11:01 | 24.984 | 5/21/2010 05:54:00 | 25.0 | 4/20/2010 16:09:01 | 26.449 |
| 4/19/2010 18:31:01 | 24.984 | 5/21/2010 06:29:00 | 25.0 | 4/20/2010 16:29:01 | 26.449 |
| 4/19/2010 18:51:01 | 24.984 | 5/21/2010 07:04:00 | 25.0 | 4/20/2010 16:49:01 | 26.449 |
| 4/19/2010 19:11:01 | 24.984 | 5/21/2010 07:39:00 | 25.0 | 4/20/2010 17:09:01 | 26.449 |
| 4/19/2010 19:31:01 | 25.047 | 5/21/2010 08:14:00 | 25.0 | 4/20/2010 17:29:01 | 26.449 |
| 4/19/2010 19:51:01 | 25.047 | 5/21/2010 08:49:00 | 25.0 | 4/20/2010 17:49:01 | 26.449 |
| 4/19/2010 20:11:01 | 25.047 | 5/21/2010 09:24:00 | 25.0 | 4/20/2010 18:09:01 | 26.449 |

|                    |        |                    |      |                    |        |
|--------------------|--------|--------------------|------|--------------------|--------|
| 4/19/2010 20:31:01 | 25.047 | 5/21/2010 09:59:00 | 25.0 | 4/20/2010 18:29:01 | 26.449 |
| 4/19/2010 20:51:01 | 25.047 | 5/21/2010 10:34:00 | 25.0 | 4/20/2010 18:49:01 | 26.449 |
| 4/19/2010 21:11:01 | 25.047 | 5/21/2010 11:09:00 | 25.0 | 4/20/2010 19:09:01 | 26.449 |
| 4/19/2010 21:31:01 | 25.047 | 5/21/2010 11:44:00 | 25.0 | 4/20/2010 19:29:01 | 26.449 |
| 4/19/2010 21:51:01 | 25.047 | 5/21/2010 12:19:00 | 25.0 | 4/20/2010 19:49:01 | 26.449 |
| 4/19/2010 22:11:01 | 25.047 | 5/21/2010 12:54:00 | 25.0 | 4/20/2010 20:09:01 | 26.449 |
| 4/19/2010 22:31:01 | 25.047 | 5/21/2010 13:29:00 | 25.0 | 4/20/2010 20:29:01 | 26.449 |
| 4/19/2010 22:51:01 | 25.047 | 5/21/2010 14:04:00 | 25.0 | 4/20/2010 20:49:01 | 26.449 |
| 4/19/2010 23:11:01 | 25.047 | 5/21/2010 14:39:00 | 25.0 | 4/20/2010 21:09:01 | 26.449 |
| 4/19/2010 23:31:01 | 25.047 | 5/21/2010 15:14:00 | 25.0 | 4/20/2010 21:29:01 | 26.449 |
| 4/19/2010 23:51:01 | 25.109 | 5/21/2010 15:49:00 | 25.0 | 4/20/2010 21:49:01 | 26.449 |
| 4/20/2010 00:11:01 | 25.109 | 5/21/2010 16:24:00 | 25.0 | 4/20/2010 22:09:01 | 26.449 |
| 4/20/2010 00:31:01 | 25.109 | 5/21/2010 16:59:00 | 25.5 | 4/20/2010 22:29:01 | 26.449 |
| 4/20/2010 00:51:01 | 25.109 | 5/21/2010 17:34:00 | 25.5 | 4/20/2010 22:49:01 | 26.449 |
| 4/20/2010 01:11:01 | 25.109 | 5/21/2010 18:09:00 | 25.5 | 4/20/2010 23:09:01 | 26.449 |
| 4/20/2010 01:31:01 | 25.109 | 5/21/2010 18:44:00 | 25.5 | 4/20/2010 23:29:01 | 26.449 |
| 4/20/2010 01:51:01 | 25.109 | 5/21/2010 19:19:00 | 25.5 | 4/20/2010 23:49:01 | 26.512 |
| 4/20/2010 02:11:01 | 25.109 | 5/21/2010 19:54:00 | 25.5 | 4/21/2010 00:09:01 | 26.512 |
| 4/20/2010 02:31:01 | 25.109 | 5/21/2010 20:29:00 | 25.5 | 4/21/2010 00:29:01 | 26.512 |
| 4/20/2010 02:51:01 | 25.109 | 5/21/2010 21:04:00 | 25.5 | 4/21/2010 00:49:01 | 26.512 |
| 4/20/2010 03:11:01 | 25.109 | 5/21/2010 21:39:00 | 25.5 | 4/21/2010 01:09:01 | 26.512 |
| 4/20/2010 03:31:01 | 25.109 | 5/21/2010 22:14:00 | 25.5 | 4/21/2010 01:29:01 | 26.512 |
| 4/20/2010 03:51:01 | 25.109 | 5/21/2010 22:49:00 | 25.5 | 4/21/2010 01:49:01 | 26.512 |
| 4/20/2010 04:11:01 | 25.109 | 5/21/2010 23:24:00 | 25.5 | 4/21/2010 02:09:01 | 26.512 |
| 4/20/2010 04:31:01 | 25.109 | 5/21/2010 23:59:00 | 25.5 | 4/21/2010 02:29:01 | 26.512 |
| 4/20/2010 04:51:01 | 25.109 | 5/22/2010 00:34:00 | 25.5 | 4/21/2010 02:49:01 | 26.512 |
| 4/20/2010 05:11:01 | 25.109 | 5/22/2010 01:09:00 | 25.5 | 4/21/2010 03:09:01 | 26.512 |
| 4/20/2010 05:31:01 | 25.109 | 5/22/2010 01:44:00 | 25.5 | 4/21/2010 03:29:01 | 26.512 |
| 4/20/2010 05:51:01 | 25.109 | 5/22/2010 02:19:00 | 25.5 | 4/21/2010 03:49:01 | 26.512 |
| 4/20/2010 06:11:01 | 25.109 | 5/22/2010 02:54:00 | 25.5 | 4/21/2010 04:09:01 | 26.512 |
| 4/20/2010 06:31:01 | 25.109 | 5/22/2010 03:29:00 | 25.5 | 4/21/2010 04:29:01 | 26.512 |
| 4/20/2010 06:51:01 | 25.109 | 5/22/2010 04:04:00 | 25.5 | 4/21/2010 04:49:01 | 26.512 |
| 4/20/2010 07:11:01 | 25.109 | 5/22/2010 04:39:00 | 25.5 | 4/21/2010 05:09:01 | 26.512 |
| 4/20/2010 07:31:01 | 25.109 | 5/22/2010 05:14:00 | 25.5 | 4/21/2010 05:29:01 | 26.512 |
| 4/20/2010 07:51:01 | 25.109 | 5/22/2010 05:49:00 | 25.0 | 4/21/2010 05:49:01 | 26.512 |
| 4/20/2010 08:11:01 | 25.109 | 5/22/2010 06:24:00 | 25.0 | 4/21/2010 06:09:01 | 26.512 |
| 4/20/2010 08:31:01 | 25.109 | 5/22/2010 06:59:00 | 25.0 | 4/21/2010 06:29:01 | 26.512 |
| 4/20/2010 08:51:01 | 25.109 | 5/22/2010 07:34:00 | 25.0 | 4/21/2010 06:49:01 | 26.512 |
| 4/20/2010 09:11:01 | 25.109 | 5/22/2010 08:09:00 | 25.0 | 4/21/2010 07:09:01 | 26.512 |
| 4/20/2010 09:31:01 | 25.109 | 5/22/2010 08:44:00 | 25.0 | 4/21/2010 07:29:01 | 26.512 |
| 4/20/2010 09:51:01 | 25.109 | 5/22/2010 09:19:00 | 25.0 | 4/21/2010 07:49:01 | 26.512 |
| 4/20/2010 10:11:01 | 25.109 | 5/22/2010 09:54:00 | 25.0 | 4/21/2010 08:09:01 | 26.512 |
| 4/20/2010 10:31:01 | 25.109 | 5/22/2010 10:29:00 | 25.0 | 4/21/2010 08:29:01 | 26.512 |
| 4/20/2010 10:51:01 | 25.109 | 5/22/2010 11:04:00 | 25.0 | 4/21/2010 08:49:01 | 26.512 |
| 4/20/2010 11:11:01 | 25.109 | 5/22/2010 11:39:00 | 25.0 | 4/21/2010 09:09:01 | 26.512 |
| 4/20/2010 11:31:01 | 25.109 | 5/22/2010 12:14:00 | 25.0 | 4/21/2010 09:29:01 | 26.512 |
| 4/20/2010 11:51:01 | 25.109 | 5/22/2010 12:49:00 | 25.0 | 4/21/2010 09:49:01 | 26.512 |
| 4/20/2010 12:11:01 | 25.109 | 5/22/2010 13:24:00 | 25.0 | 4/21/2010 10:09:01 | 26.512 |
| 4/20/2010 12:31:01 | 25.109 | 5/22/2010 13:59:00 | 25.0 | 4/21/2010 10:29:01 | 26.512 |
| 4/20/2010 12:51:01 | 25.109 | 5/22/2010 14:34:00 | 25.0 | 4/21/2010 10:49:01 | 26.512 |

|                    |                           |                         |        |
|--------------------|---------------------------|-------------------------|--------|
| 4/20/2010 13:11:01 | 25.109 5/22/2010 15:09:00 | 25.0 4/21/2010 11:09:01 | 26.512 |
| 4/20/2010 13:31:01 | 25.109 5/22/2010 15:44:00 | 25.0 4/21/2010 11:29:01 | 26.512 |
| 4/20/2010 13:51:01 | 25.109 5/22/2010 16:19:00 | 25.0 4/21/2010 11:49:01 | 26.512 |
| 4/20/2010 14:11:01 | 25.109 5/22/2010 16:54:00 | 25.5 4/21/2010 12:09:01 | 26.512 |
| 4/20/2010 14:31:01 | 25.109 5/22/2010 17:29:00 | 25.5 4/21/2010 12:29:01 | 26.512 |
| 4/20/2010 14:51:01 | 25.109 5/22/2010 18:04:00 | 25.5 4/21/2010 12:49:01 | 26.512 |
| 4/20/2010 15:11:01 | 25.109 5/22/2010 18:39:00 | 25.5 4/21/2010 13:09:01 | 26.512 |
| 4/20/2010 15:31:01 | 25.109 5/22/2010 19:14:00 | 25.5 4/21/2010 13:29:01 | 26.512 |
| 4/20/2010 15:51:01 | 25.109 5/22/2010 19:49:00 | 25.5 4/21/2010 13:49:01 | 26.512 |
| 4/20/2010 16:11:01 | 25.109 5/22/2010 20:24:00 | 25.5 4/21/2010 14:09:01 | 26.512 |
| 4/20/2010 16:31:01 | 25.109 5/22/2010 20:59:00 | 25.5 4/21/2010 14:29:01 | 26.512 |
| 4/20/2010 16:51:01 | 25.109 5/22/2010 21:34:00 | 25.5 4/21/2010 14:49:01 | 26.512 |
| 4/20/2010 17:11:01 | 25.109 5/22/2010 22:09:00 | 25.5 4/21/2010 15:09:01 | 26.512 |
| 4/20/2010 17:31:01 | 25.109 5/22/2010 22:44:00 | 25.5 4/21/2010 15:29:01 | 26.512 |
| 4/20/2010 17:51:01 | 25.109 5/22/2010 23:19:00 | 25.5 4/21/2010 15:49:01 | 26.512 |
| 4/20/2010 18:11:01 | 25.109 5/22/2010 23:54:00 | 25.5 4/21/2010 16:09:01 | 26.512 |
| 4/20/2010 18:31:01 | 25.109 5/23/2010 00:29:00 | 25.5 4/21/2010 16:29:01 | 26.512 |
| 4/20/2010 18:51:01 | 25.109 5/23/2010 01:04:00 | 25.0 4/21/2010 16:49:01 | 26.512 |
| 4/20/2010 19:11:01 | 25.109 5/23/2010 01:39:00 | 25.0 4/21/2010 17:09:01 | 26.449 |
| 4/20/2010 19:31:01 | 25.109 5/23/2010 02:14:00 | 25.0 4/21/2010 17:29:01 | 26.512 |
| 4/20/2010 19:51:01 | 25.109 5/23/2010 02:49:00 | 25.0 4/21/2010 17:49:01 | 26.512 |
| 4/20/2010 20:11:01 | 25.109 5/23/2010 03:24:00 | 25.0 4/21/2010 18:09:01 | 26.512 |
| 4/20/2010 20:31:01 | 25.172 5/23/2010 03:59:00 | 25.0 4/21/2010 18:29:01 | 26.512 |
| 4/20/2010 20:51:01 | 25.172 5/23/2010 04:34:00 | 25.0 4/21/2010 18:49:01 | 26.512 |
| 4/20/2010 21:11:01 | 25.172 5/23/2010 05:09:00 | 25.0 4/21/2010 19:09:01 | 26.512 |
| 4/20/2010 21:31:01 | 25.172 5/23/2010 05:44:00 | 25.0 4/21/2010 19:29:01 | 26.512 |
| 4/20/2010 21:51:01 | 25.172 5/23/2010 06:19:00 | 25.0 4/21/2010 19:49:01 | 26.512 |
| 4/20/2010 22:11:01 | 25.172 5/23/2010 06:54:00 | 25.0 4/21/2010 20:09:01 | 26.512 |
| 4/20/2010 22:31:01 | 25.172 5/23/2010 07:29:00 | 25.0 4/21/2010 20:29:01 | 26.512 |
| 4/20/2010 22:51:01 | 25.172 5/23/2010 08:04:00 | 25.0 4/21/2010 20:49:01 | 26.512 |
| 4/20/2010 23:11:01 | 25.172 5/23/2010 08:39:00 | 25.0 4/21/2010 21:09:01 | 26.512 |
| 4/20/2010 23:31:01 | 25.172 5/23/2010 09:14:00 | 25.0 4/21/2010 21:29:01 | 26.512 |
| 4/20/2010 23:51:01 | 25.172 5/23/2010 09:49:00 | 24.5 4/21/2010 21:49:01 | 26.512 |
| 4/21/2010 00:11:01 | 25.172 5/23/2010 10:24:00 | 24.5 4/21/2010 22:09:01 | 26.512 |
| 4/21/2010 00:31:01 | 25.172 5/23/2010 10:59:00 | 24.5 4/21/2010 22:29:01 | 26.512 |
| 4/21/2010 00:51:01 | 25.172 5/23/2010 11:34:00 | 24.5 4/21/2010 22:49:01 | 26.512 |
| 4/21/2010 01:11:01 | 25.172 5/23/2010 12:09:00 | 25.0 4/21/2010 23:09:01 | 26.512 |
| 4/21/2010 01:31:01 | 25.172 5/23/2010 12:44:00 | 25.0 4/21/2010 23:29:01 | 26.512 |
| 4/21/2010 01:51:01 | 25.172 5/23/2010 13:19:00 | 25.0 4/21/2010 23:49:01 | 26.512 |
| 4/21/2010 02:11:01 | 25.234 5/23/2010 13:54:00 | 25.0 4/22/2010 00:09:01 | 26.512 |
| 4/21/2010 02:31:01 | 25.172 5/23/2010 14:29:00 | 25.0 4/22/2010 00:29:01 | 26.512 |
| 4/21/2010 02:51:01 | 25.234 5/23/2010 15:04:00 | 25.0 4/22/2010 00:49:01 | 26.512 |
| 4/21/2010 03:11:01 | 25.234 5/23/2010 15:39:00 | 25.0 4/22/2010 01:09:01 | 26.512 |
| 4/21/2010 03:31:01 | 25.172 5/23/2010 16:14:00 | 25.0 4/22/2010 01:29:01 | 26.512 |
| 4/21/2010 03:51:01 | 25.234 5/23/2010 16:49:00 | 25.0 4/22/2010 01:49:01 | 26.512 |
| 4/21/2010 04:11:01 | 25.172 5/23/2010 17:24:00 | 25.0 4/22/2010 02:09:01 | 26.512 |
| 4/21/2010 04:31:01 | 25.234 5/23/2010 17:59:00 | 25.0 4/22/2010 02:29:01 | 26.574 |
| 4/21/2010 04:51:01 | 25.234 5/23/2010 18:34:00 | 25.0 4/22/2010 02:49:01 | 26.574 |
| 4/21/2010 05:11:01 | 25.234 5/23/2010 19:09:00 | 25.0 4/22/2010 03:09:01 | 26.574 |
| 4/21/2010 05:31:01 | 25.234 5/23/2010 19:44:00 | 25.0 4/22/2010 03:29:01 | 26.574 |

|                    |        |                    |      |                    |        |
|--------------------|--------|--------------------|------|--------------------|--------|
| 4/21/2010 05:51:01 | 25.234 | 5/23/2010 20:19:00 | 25.0 | 4/22/2010 03:49:01 | 26.574 |
| 4/21/2010 06:11:01 | 25.172 | 5/23/2010 20:54:00 | 25.0 | 4/22/2010 04:09:01 | 26.574 |
| 4/21/2010 06:31:01 | 25.234 | 5/23/2010 21:29:00 | 25.0 | 4/22/2010 04:29:01 | 26.574 |
| 4/21/2010 06:51:01 | 25.234 | 5/23/2010 22:04:00 | 25.0 | 4/22/2010 04:49:01 | 26.574 |
| 4/21/2010 07:11:01 | 25.234 | 5/23/2010 22:39:00 | 25.0 | 4/22/2010 05:09:01 | 26.574 |
| 4/21/2010 07:31:01 | 25.172 | 5/23/2010 23:14:00 | 25.0 | 4/22/2010 05:29:01 | 26.574 |
| 4/21/2010 07:51:01 | 25.172 | 5/23/2010 23:49:00 | 25.0 | 4/22/2010 05:49:01 | 26.574 |
| 4/21/2010 08:11:01 | 25.172 | 5/24/2010 00:24:00 | 25.0 | 4/22/2010 06:09:01 | 26.574 |
| 4/21/2010 08:31:01 | 25.172 | 5/24/2010 00:59:00 | 25.0 | 4/22/2010 06:29:01 | 26.574 |
| 4/21/2010 08:51:01 | 25.172 | 5/24/2010 01:34:00 | 25.0 | 4/22/2010 06:49:01 | 26.574 |
| 4/21/2010 09:11:01 | 25.172 | 5/24/2010 02:09:00 | 25.0 | 4/22/2010 07:09:01 | 26.574 |
| 4/21/2010 09:31:01 | 25.172 | 5/24/2010 02:44:00 | 25.0 | 4/22/2010 07:29:01 | 26.574 |
| 4/21/2010 09:51:01 | 25.172 | 5/24/2010 03:19:00 | 25.0 | 4/22/2010 07:49:01 | 26.574 |
| 4/21/2010 10:11:01 | 25.172 | 5/24/2010 03:54:00 | 25.0 | 4/22/2010 08:09:01 | 26.574 |
| 4/21/2010 10:31:01 | 25.172 | 5/24/2010 04:29:00 | 25.0 | 4/22/2010 08:29:01 | 26.574 |
| 4/21/2010 10:51:01 | 25.172 | 5/24/2010 05:04:00 | 25.0 | 4/22/2010 08:49:01 | 26.512 |
| 4/21/2010 11:11:01 | 25.172 | 5/24/2010 05:39:00 | 25.0 | 4/22/2010 09:09:01 | 26.574 |
| 4/21/2010 11:31:01 | 25.172 | 5/24/2010 06:14:00 | 24.5 | 4/22/2010 09:29:01 | 26.574 |
| 4/21/2010 11:51:01 | 25.172 | 5/24/2010 06:49:00 | 24.5 | 4/22/2010 09:49:01 | 26.512 |
| 4/21/2010 12:11:01 | 25.172 | 5/24/2010 07:24:00 | 24.5 | 4/22/2010 10:09:01 | 26.512 |
| 4/21/2010 12:31:01 | 25.172 | 5/24/2010 07:59:00 | 24.5 | 4/22/2010 10:29:01 | 26.512 |
| 4/21/2010 12:51:01 | 25.172 | 5/24/2010 08:34:00 | 24.5 | 4/22/2010 10:49:01 | 26.512 |
| 4/21/2010 13:11:01 | 25.172 | 5/24/2010 09:09:00 | 24.5 | 4/22/2010 11:09:01 | 26.512 |
| 4/21/2010 13:31:01 | 25.172 | 5/24/2010 09:44:00 | 24.5 | 4/22/2010 11:29:01 | 26.512 |
| 4/21/2010 13:51:01 | 25.172 | 5/24/2010 10:19:00 | 24.5 | 4/22/2010 11:49:01 | 26.512 |
| 4/21/2010 14:11:01 | 25.172 | 5/24/2010 10:54:00 | 24.5 | 4/22/2010 12:09:01 | 26.512 |
| 4/21/2010 14:31:01 | 25.109 | 5/24/2010 11:29:00 | 24.5 | 4/22/2010 12:29:01 | 26.512 |
| 4/21/2010 14:51:01 | 25.109 | 5/24/2010 12:04:00 | 24.5 | 4/22/2010 12:49:01 | 26.512 |
| 4/21/2010 15:11:01 | 25.109 | 5/24/2010 12:39:00 | 24.5 | 4/22/2010 13:09:01 | 26.512 |
| 4/21/2010 15:31:01 | 25.109 | 5/24/2010 13:14:00 | 24.5 | 4/22/2010 13:29:01 | 26.512 |
| 4/21/2010 15:51:01 | 25.109 | 5/24/2010 13:49:00 | 24.5 | 4/22/2010 13:49:01 | 26.512 |
| 4/21/2010 16:11:01 | 25.109 | 5/24/2010 14:24:00 | 24.5 | 4/22/2010 14:09:01 | 26.512 |
| 4/21/2010 16:31:01 | 25.109 | 5/24/2010 14:59:00 | 24.5 | 4/22/2010 14:29:01 | 26.512 |
| 4/21/2010 16:51:01 | 25.109 | 5/24/2010 15:34:00 | 25.0 | 4/22/2010 14:49:01 | 26.512 |
| 4/21/2010 17:11:01 | 25.109 | 5/24/2010 16:09:00 | 25.0 | 4/22/2010 15:09:01 | 26.449 |
| 4/21/2010 17:31:01 | 25.109 | 5/24/2010 16:44:00 | 25.0 | 4/22/2010 15:29:01 | 26.449 |
| 4/21/2010 17:51:01 | 25.109 | 5/24/2010 17:19:00 | 25.0 | 4/22/2010 15:49:01 | 26.449 |
| 4/21/2010 18:11:01 | 25.109 | 5/24/2010 17:54:00 | 25.0 | 4/22/2010 16:09:01 | 26.449 |
| 4/21/2010 18:31:01 | 25.109 | 5/24/2010 18:29:00 | 25.0 | 4/22/2010 16:29:01 | 26.449 |
| 4/21/2010 18:51:01 | 25.109 | 5/24/2010 19:04:00 | 25.0 | 4/22/2010 16:49:01 | 26.449 |
| 4/21/2010 19:11:01 | 25.172 | 5/24/2010 19:39:00 | 25.0 | 4/22/2010 17:09:01 | 26.449 |
| 4/21/2010 19:31:01 | 25.172 | 5/24/2010 20:14:00 | 25.0 | 4/22/2010 17:29:01 | 26.449 |
| 4/21/2010 19:51:01 | 25.109 | 5/24/2010 20:49:00 | 25.0 | 4/22/2010 17:49:01 | 26.449 |
| 4/21/2010 20:11:01 | 25.172 | 5/24/2010 21:24:00 | 25.0 | 4/22/2010 18:09:01 | 26.449 |
| 4/21/2010 20:31:01 | 25.172 | 5/24/2010 21:59:00 | 25.0 | 4/22/2010 18:29:01 | 26.449 |
| 4/21/2010 20:51:01 | 25.172 | 5/24/2010 22:34:00 | 25.0 | 4/22/2010 18:49:01 | 26.449 |
| 4/21/2010 21:11:01 | 25.172 | 5/24/2010 23:09:00 | 25.0 | 4/22/2010 19:09:01 | 26.449 |
| 4/21/2010 21:31:01 | 25.172 | 5/24/2010 23:44:00 | 25.0 | 4/22/2010 19:29:01 | 26.449 |
| 4/21/2010 21:51:01 | 25.172 | 5/25/2010 00:19:00 | 25.0 | 4/22/2010 19:49:01 | 26.449 |
| 4/21/2010 22:11:01 | 25.172 | 5/25/2010 00:54:00 | 25.0 | 4/22/2010 20:09:01 | 26.449 |

|                    |        |                    |      |                    |        |
|--------------------|--------|--------------------|------|--------------------|--------|
| 4/21/2010 22:31:01 | 25.172 | 5/25/2010 01:29:00 | 25.0 | 4/22/2010 20:29:01 | 26.449 |
| 4/21/2010 22:51:01 | 25.172 | 5/25/2010 02:04:00 | 25.0 | 4/22/2010 20:49:01 | 26.449 |
| 4/21/2010 23:11:01 | 25.172 | 5/25/2010 02:39:00 | 25.0 | 4/22/2010 21:09:01 | 26.449 |
| 4/21/2010 23:31:01 | 25.172 | 5/25/2010 03:14:00 | 25.0 | 4/22/2010 21:29:01 | 26.449 |
| 4/21/2010 23:51:01 | 25.172 | 5/25/2010 03:49:00 | 25.0 | 4/22/2010 21:49:01 | 26.449 |
| 4/22/2010 00:11:01 | 25.172 | 5/25/2010 04:24:00 | 25.0 | 4/22/2010 22:09:01 | 26.449 |
| 4/22/2010 00:31:01 | 25.172 | 5/25/2010 04:59:00 | 25.0 | 4/22/2010 22:29:01 | 26.449 |
| 4/22/2010 00:51:01 | 25.172 | 5/25/2010 05:34:00 | 25.0 | 4/22/2010 22:49:01 | 26.449 |
| 4/22/2010 01:11:01 | 25.172 | 5/25/2010 06:09:00 | 25.0 | 4/22/2010 23:09:01 | 26.449 |
| 4/22/2010 01:31:01 | 25.172 | 5/25/2010 06:44:00 | 25.0 | 4/22/2010 23:29:01 | 26.449 |
| 4/22/2010 01:51:01 | 25.234 | 5/25/2010 07:19:00 | 25.0 | 4/22/2010 23:49:01 | 26.449 |
| 4/22/2010 02:11:01 | 25.172 | 5/25/2010 07:54:00 | 25.0 | 4/23/2010 00:09:01 | 26.449 |
| 4/22/2010 02:31:01 | 25.234 | 5/25/2010 08:29:00 | 25.0 | 4/23/2010 00:29:01 | 26.449 |
| 4/22/2010 02:51:01 | 25.234 | 5/25/2010 09:04:00 | 24.5 | 4/23/2010 00:49:01 | 26.449 |
| 4/22/2010 03:11:01 | 25.234 | 5/25/2010 09:39:00 | 24.5 | 4/23/2010 01:09:01 | 26.449 |
| 4/22/2010 03:31:01 | 25.234 | 5/25/2010 10:14:00 | 24.5 | 4/23/2010 01:29:01 | 26.449 |
| 4/22/2010 03:51:01 | 25.234 | 5/25/2010 10:49:00 | 24.5 | 4/23/2010 01:49:01 | 26.449 |
| 4/22/2010 04:11:01 | 25.234 | 5/25/2010 11:24:00 | 24.5 | 4/23/2010 02:09:01 | 26.449 |
| 4/22/2010 04:31:01 | 25.234 | 5/25/2010 11:59:00 | 24.5 | 4/23/2010 02:29:01 | 26.449 |
| 4/22/2010 04:51:01 | 25.234 | 5/25/2010 12:34:00 | 24.5 | 4/23/2010 02:49:01 | 26.449 |
| 4/22/2010 05:11:01 | 25.234 | 5/25/2010 13:09:00 | 25.0 | 4/23/2010 03:09:01 | 26.449 |
| 4/22/2010 05:31:01 | 25.234 | 5/25/2010 13:44:00 | 25.0 | 4/23/2010 03:29:01 | 26.449 |
| 4/22/2010 05:51:01 | 25.234 | 5/25/2010 14:19:00 | 25.0 | 4/23/2010 03:49:01 | 26.449 |
| 4/22/2010 06:11:01 | 25.234 | 5/25/2010 14:54:00 | 25.0 | 4/23/2010 04:09:01 | 26.449 |
| 4/22/2010 06:31:01 | 25.234 | 5/25/2010 15:29:00 | 25.0 | 4/23/2010 04:29:01 | 26.449 |
| 4/22/2010 06:51:01 | 25.234 | 5/25/2010 16:04:00 | 25.0 | 4/23/2010 04:49:01 | 26.449 |
| 4/22/2010 07:11:01 | 25.234 | 5/25/2010 16:39:00 | 25.0 | 4/23/2010 05:09:01 | 26.449 |
| 4/22/2010 07:31:01 | 25.234 | 5/25/2010 17:14:00 | 25.0 | 4/23/2010 05:29:01 | 26.449 |
| 4/22/2010 07:51:01 | 25.234 | 5/25/2010 17:49:00 | 25.0 | 4/23/2010 05:49:01 | 26.449 |
| 4/22/2010 08:11:01 | 25.172 | 5/25/2010 18:24:00 | 25.0 | 4/23/2010 06:09:01 | 26.449 |
| 4/22/2010 08:31:01 | 25.172 | 5/25/2010 18:59:00 | 25.0 | 4/23/2010 06:29:01 | 26.449 |
| 4/22/2010 08:51:01 | 25.172 | 5/25/2010 19:34:00 | 25.0 | 4/23/2010 06:49:01 | 26.449 |
| 4/22/2010 09:11:01 | 25.172 | 5/25/2010 20:09:00 | 25.0 | 4/23/2010 07:09:01 | 26.449 |
| 4/22/2010 09:31:01 | 25.172 | 5/25/2010 20:44:00 | 25.5 | 4/23/2010 07:29:01 | 26.449 |
| 4/22/2010 09:51:01 | 25.172 | 5/25/2010 21:19:00 | 25.0 | 4/23/2010 07:49:01 | 26.449 |
| 4/22/2010 10:11:01 | 25.172 | 5/25/2010 21:54:00 | 25.0 | 4/23/2010 08:09:01 | 26.449 |
| 4/22/2010 10:31:01 | 25.172 | 5/25/2010 22:29:00 | 25.0 | 4/23/2010 08:29:01 | 26.449 |
| 4/22/2010 10:51:01 | 25.172 | 5/25/2010 23:04:00 | 25.0 | 4/23/2010 08:49:01 | 26.449 |
| 4/22/2010 11:11:01 | 25.172 | 5/25/2010 23:39:00 | 25.0 | 4/23/2010 09:09:01 | 26.449 |
| 4/22/2010 11:31:01 | 25.172 | 5/26/2010 00:14:00 | 25.0 | 4/23/2010 09:29:01 | 26.449 |
| 4/22/2010 11:51:01 | 25.172 | 5/26/2010 00:49:00 | 25.0 | 4/23/2010 09:49:01 | 26.449 |
| 4/22/2010 12:11:01 | 25.172 | 5/26/2010 01:24:00 | 25.0 | 4/23/2010 10:09:01 | 26.449 |
| 4/22/2010 12:31:01 | 25.172 | 5/26/2010 01:59:00 | 25.0 | 4/23/2010 10:29:01 | 26.449 |
| 4/22/2010 12:51:01 | 25.109 | 5/26/2010 02:34:00 | 25.0 | 4/23/2010 10:49:01 | 26.449 |
| 4/22/2010 13:11:01 | 25.109 | 5/26/2010 03:09:00 | 25.0 | 4/23/2010 11:09:01 | 26.449 |
| 4/22/2010 13:31:01 | 25.109 | 5/26/2010 03:44:00 | 25.0 | 4/23/2010 11:29:01 | 26.449 |
| 4/22/2010 13:51:01 | 25.109 | 5/26/2010 04:19:00 | 25.0 | 4/23/2010 11:49:01 | 26.449 |
| 4/22/2010 14:11:01 | 25.109 | 5/26/2010 04:54:00 | 25.0 | 4/23/2010 12:09:01 | 26.449 |
| 4/22/2010 14:31:01 | 25.109 | 5/26/2010 05:29:00 | 25.0 | 4/23/2010 12:29:01 | 26.449 |
| 4/22/2010 14:51:01 | 25.109 | 5/26/2010 06:04:00 | 25.0 | 4/23/2010 12:49:01 | 26.449 |

|                    |                           |                         |        |
|--------------------|---------------------------|-------------------------|--------|
| 4/22/2010 15:11:01 | 25.109 5/26/2010 06:39:00 | 24.5 4/23/2010 13:09:01 | 26.449 |
| 4/22/2010 15:31:01 | 25.109 5/26/2010 07:14:00 | 24.5 4/23/2010 13:29:01 | 26.449 |
| 4/22/2010 15:51:01 | 25.109 5/26/2010 07:49:00 | 24.5 4/23/2010 13:49:01 | 26.449 |
| 4/22/2010 16:11:01 | 25.109 5/26/2010 08:24:00 | 24.5 4/23/2010 14:09:01 | 26.387 |
| 4/22/2010 16:31:01 | 25.109 5/26/2010 08:59:00 | 24.5 4/23/2010 14:29:01 | 26.387 |
| 4/22/2010 16:51:01 | 25.109 5/26/2010 09:34:00 | 24.5 4/23/2010 14:49:01 | 26.387 |
| 4/22/2010 17:11:01 | 25.109 5/26/2010 10:09:00 | 24.5 4/23/2010 15:09:01 | 26.387 |
| 4/22/2010 17:31:01 | 25.109 5/26/2010 10:44:00 | 24.5 4/23/2010 15:29:01 | 26.387 |
| 4/22/2010 17:51:01 | 25.109 5/26/2010 11:19:00 | 24.5 4/23/2010 15:49:01 | 26.387 |
| 4/22/2010 18:11:01 | 25.109 5/26/2010 11:54:00 | 24.5 4/23/2010 16:09:01 | 26.387 |
| 4/22/2010 18:31:01 | 25.109 5/26/2010 12:29:00 | 24.5 4/23/2010 16:29:01 | 26.387 |
| 4/22/2010 18:51:01 | 25.109 5/26/2010 13:04:00 | 24.5 4/23/2010 16:49:01 | 26.387 |
| 4/22/2010 19:11:01 | 25.109 5/26/2010 13:39:00 | 24.5 4/23/2010 17:09:01 | 26.387 |
| 4/22/2010 19:31:01 | 25.109 5/26/2010 14:14:00 | 24.5 4/23/2010 17:29:01 | 26.387 |
| 4/22/2010 19:51:01 | 25.109 5/26/2010 14:49:00 | 25.0 4/23/2010 17:49:01 | 26.387 |
| 4/22/2010 20:11:01 | 25.109 5/26/2010 15:24:00 | 25.0 4/23/2010 18:09:01 | 26.387 |
| 4/22/2010 20:31:01 | 25.109 5/26/2010 15:59:00 | 25.0 4/23/2010 18:29:01 | 26.387 |
| 4/22/2010 20:51:01 | 25.109 5/26/2010 16:34:00 | 25.0 4/23/2010 18:49:01 | 26.387 |
| 4/22/2010 21:11:01 | 25.109 5/26/2010 17:09:00 | 25.0 4/23/2010 19:09:01 | 26.387 |
| 4/22/2010 21:31:01 | 25.109 5/26/2010 17:44:00 | 25.0 4/23/2010 19:29:01 | 26.387 |
| 4/22/2010 21:51:01 | 25.109 5/26/2010 18:19:00 | 25.0 4/23/2010 19:49:01 | 26.387 |
| 4/22/2010 22:11:01 | 25.109 5/26/2010 18:54:00 | 25.5 4/23/2010 20:09:01 | 26.387 |
| 4/22/2010 22:31:01 | 25.109 5/26/2010 19:29:00 | 25.5 4/23/2010 20:29:01 | 26.387 |
| 4/22/2010 22:51:01 | 25.109 5/26/2010 20:04:00 | 25.5 4/23/2010 20:49:01 | 26.387 |
| 4/22/2010 23:11:01 | 25.109 5/26/2010 20:39:00 | 25.5 4/23/2010 21:09:01 | 26.387 |
| 4/22/2010 23:31:01 | 25.109 5/26/2010 21:14:00 | 25.5 4/23/2010 21:29:01 | 26.387 |
| 4/22/2010 23:51:01 | 25.109 5/26/2010 21:49:00 | 25.5 4/23/2010 21:49:01 | 26.387 |
| 4/23/2010 00:11:01 | 25.109 5/26/2010 22:24:00 | 25.0 4/23/2010 22:09:01 | 26.387 |
| 4/23/2010 00:31:01 | 25.172 5/26/2010 22:59:00 | 25.0 4/23/2010 22:29:01 | 26.387 |
| 4/23/2010 00:51:01 | 25.172 5/26/2010 23:34:00 | 25.0 4/23/2010 22:49:01 | 26.387 |
| 4/23/2010 01:11:01 | 25.172 5/27/2010 00:09:00 | 25.0 4/23/2010 23:09:01 | 26.449 |
| 4/23/2010 01:31:01 | 25.172 5/27/2010 00:44:00 | 25.0 4/23/2010 23:29:01 | 26.449 |
| 4/23/2010 01:51:01 | 25.172 5/27/2010 01:19:00 | 25.0 4/23/2010 23:49:01 | 26.449 |
| 4/23/2010 02:11:01 | 25.172 5/27/2010 01:54:00 | 25.0 4/24/2010 00:09:01 | 26.449 |
| 4/23/2010 02:31:01 | 25.172 5/27/2010 02:29:00 | 25.0 4/24/2010 00:29:01 | 26.449 |
| 4/23/2010 02:51:01 | 25.172 5/27/2010 03:04:00 | 25.0 4/24/2010 00:49:01 | 26.449 |
| 4/23/2010 03:11:01 | 25.172 5/27/2010 03:39:00 | 25.0 4/24/2010 01:09:01 | 26.449 |
| 4/23/2010 03:31:01 | 25.172 5/27/2010 04:14:00 | 25.0 4/24/2010 01:29:01 | 26.449 |
| 4/23/2010 03:51:01 | 25.172 5/27/2010 04:49:00 | 25.0 4/24/2010 01:49:01 | 26.449 |
| 4/23/2010 04:11:01 | 25.172 5/27/2010 05:24:00 | 25.0 4/24/2010 02:09:01 | 26.449 |
| 4/23/2010 04:31:01 | 25.172 5/27/2010 05:59:00 | 25.0 4/24/2010 02:29:01 | 26.449 |
| 4/23/2010 04:51:01 | 25.172 5/27/2010 06:34:00 | 25.0 4/24/2010 02:49:01 | 26.449 |
| 4/23/2010 05:11:01 | 25.172 5/27/2010 07:09:00 | 25.0 4/24/2010 03:09:01 | 26.449 |
| 4/23/2010 05:31:01 | 25.172 5/27/2010 07:44:00 | 25.0 4/24/2010 03:29:01 | 26.449 |
| 4/23/2010 05:51:01 | 25.172 5/27/2010 08:19:00 | 25.0 4/24/2010 03:49:01 | 26.449 |
| 4/23/2010 06:11:01 | 25.172 5/27/2010 08:54:00 | 25.0 4/24/2010 04:09:01 | 26.449 |
| 4/23/2010 06:31:01 | 25.172 5/27/2010 09:29:00 | 25.0 4/24/2010 04:29:01 | 26.449 |
| 4/23/2010 06:51:01 | 25.172 5/27/2010 10:04:00 | 24.5 4/24/2010 04:49:01 | 26.449 |
| 4/23/2010 07:11:01 | 25.172 5/27/2010 10:39:00 | 24.5 4/24/2010 05:09:01 | 26.449 |
| 4/23/2010 07:31:01 | 25.172 5/27/2010 11:14:00 | 24.5 4/24/2010 05:29:01 | 26.449 |

|                    |        |                    |      |                    |        |
|--------------------|--------|--------------------|------|--------------------|--------|
| 4/23/2010 07:51:01 | 25.172 | 5/27/2010 11:49:00 | 24.5 | 4/24/2010 05:49:01 | 26.449 |
| 4/23/2010 08:11:01 | 25.172 | 5/27/2010 12:24:00 | 25.0 | 4/24/2010 06:09:01 | 26.449 |
| 4/23/2010 08:31:01 | 25.172 | 5/27/2010 12:59:00 | 25.0 | 4/24/2010 06:29:01 | 26.512 |
| 4/23/2010 08:51:01 | 25.172 | 5/27/2010 13:34:00 | 25.0 | 4/24/2010 06:49:01 | 26.449 |
| 4/23/2010 09:11:01 | 25.109 | 5/27/2010 14:09:00 | 25.0 | 4/24/2010 07:09:01 | 26.449 |
| 4/23/2010 09:31:01 | 25.109 | 5/27/2010 14:44:00 | 25.0 | 4/24/2010 07:29:01 | 26.449 |
| 4/23/2010 09:51:01 | 25.172 | 5/27/2010 15:19:00 | 25.0 | 4/24/2010 07:49:01 | 26.512 |
| 4/23/2010 10:11:01 | 25.109 | 5/27/2010 15:54:00 | 25.0 | 4/24/2010 08:09:01 | 26.512 |
| 4/23/2010 10:31:01 | 25.109 | 5/27/2010 16:29:00 | 25.0 | 4/24/2010 08:29:01 | 26.512 |
| 4/23/2010 10:51:01 | 25.109 | 5/27/2010 17:04:00 | 25.0 | 4/24/2010 08:49:01 | 26.512 |
| 4/23/2010 11:11:01 | 25.109 | 5/27/2010 17:39:00 | 25.0 | 4/24/2010 09:09:01 | 26.512 |
| 4/23/2010 11:31:01 | 25.109 | 5/27/2010 18:14:00 | 25.0 | 4/24/2010 09:29:01 | 26.449 |
| 4/23/2010 11:51:01 | 25.109 | 5/27/2010 18:49:00 | 25.5 | 4/24/2010 09:49:01 | 26.512 |
| 4/23/2010 12:11:01 | 25.109 | 5/27/2010 19:24:00 | 25.5 | 4/24/2010 10:09:01 | 26.449 |
| 4/23/2010 12:31:01 | 25.109 | 5/27/2010 19:59:00 | 25.5 | 4/24/2010 10:29:01 | 26.512 |
| 4/23/2010 12:51:01 | 25.109 | 5/27/2010 20:34:00 | 25.5 | 4/24/2010 10:49:01 | 26.512 |
| 4/23/2010 13:11:01 | 25.109 | 5/27/2010 21:09:00 | 25.5 | 4/24/2010 11:09:01 | 26.512 |
| 4/23/2010 13:31:01 | 25.109 | 5/27/2010 21:44:00 | 25.5 | 4/24/2010 11:29:01 | 26.512 |
| 4/23/2010 13:51:01 | 25.109 | 5/27/2010 22:19:00 | 26.0 | 4/24/2010 11:49:01 | 26.512 |
| 4/23/2010 14:11:01 | 25.109 | 5/27/2010 22:54:00 | 25.5 | 4/24/2010 12:09:01 | 26.512 |
| 4/23/2010 14:31:01 | 25.109 | 5/27/2010 23:29:00 | 25.5 | 4/24/2010 12:29:01 | 26.449 |
| 4/23/2010 14:51:01 | 25.109 | 5/28/2010 00:04:00 | 25.5 | 4/24/2010 12:49:01 | 26.449 |
| 4/23/2010 15:11:01 | 25.109 | 5/28/2010 00:39:00 | 25.5 | 4/24/2010 13:09:01 | 26.449 |
| 4/23/2010 15:31:01 | 25.109 | 5/28/2010 01:14:00 | 25.5 | 4/24/2010 13:29:01 | 26.449 |
| 4/23/2010 15:51:01 | 25.109 | 5/28/2010 01:49:00 | 25.5 | 4/24/2010 13:49:01 | 26.449 |
| 4/23/2010 16:11:01 | 25.109 | 5/28/2010 02:24:00 | 25.5 | 4/24/2010 14:09:01 | 26.512 |
| 4/23/2010 16:31:01 | 25.109 | 5/28/2010 02:59:00 | 25.5 | 4/24/2010 14:29:01 | 26.512 |
| 4/23/2010 16:51:01 | 25.109 | 5/28/2010 03:34:00 | 25.0 | 4/24/2010 14:49:01 | 26.449 |
| 4/23/2010 17:11:01 | 25.109 | 5/28/2010 04:09:00 | 25.0 | 4/24/2010 15:09:01 | 26.449 |
| 4/23/2010 17:31:01 | 25.109 | 5/28/2010 04:44:00 | 25.0 | 4/24/2010 15:29:01 | 26.449 |
| 4/23/2010 17:51:01 | 25.109 | 5/28/2010 05:19:00 | 25.0 | 4/24/2010 15:49:01 | 26.449 |
| 4/23/2010 18:11:01 | 25.109 | 5/28/2010 05:54:00 | 25.0 | 4/24/2010 16:09:01 | 26.449 |
| 4/23/2010 18:31:01 | 25.109 | 5/28/2010 06:29:00 | 25.0 | 4/24/2010 16:29:01 | 26.449 |
| 4/23/2010 18:51:01 | 25.109 | 5/28/2010 07:04:00 | 25.0 | 4/24/2010 16:49:01 | 26.449 |
| 4/23/2010 19:11:01 | 25.109 | 5/28/2010 07:39:00 | 25.0 | 4/24/2010 17:09:01 | 26.449 |
| 4/23/2010 19:31:01 | 25.109 | 5/28/2010 08:14:00 | 25.0 | 4/24/2010 17:29:01 | 26.449 |
| 4/23/2010 19:51:01 | 25.109 | 5/28/2010 08:49:00 | 25.0 | 4/24/2010 17:49:01 | 26.449 |
| 4/23/2010 20:11:01 | 25.109 | 5/28/2010 09:24:00 | 25.0 | 4/24/2010 18:09:01 | 26.449 |
| 4/23/2010 20:31:01 | 25.109 | 5/28/2010 09:59:00 | 25.0 | 4/24/2010 18:29:01 | 26.449 |
| 4/23/2010 20:51:01 | 25.109 | 5/28/2010 10:34:00 | 25.0 | 4/24/2010 18:49:01 | 26.449 |
| 4/23/2010 21:11:01 | 25.109 | 5/28/2010 11:09:00 | 25.0 | 4/24/2010 19:09:01 | 26.449 |
| 4/23/2010 21:31:01 | 25.172 | 5/28/2010 11:44:00 | 25.0 | 4/24/2010 19:29:01 | 26.449 |
| 4/23/2010 21:51:01 | 25.172 | 5/28/2010 12:19:00 | 25.0 | 4/24/2010 19:49:01 | 26.449 |
| 4/23/2010 22:11:01 | 25.172 | 5/28/2010 12:54:00 | 25.0 | 4/24/2010 20:09:01 | 26.512 |
| 4/23/2010 22:31:01 | 25.172 | 5/28/2010 13:29:00 | 25.0 | 4/24/2010 20:29:01 | 26.449 |
| 4/23/2010 22:51:01 | 25.172 | 5/28/2010 14:04:00 | 25.5 | 4/24/2010 20:49:01 | 26.449 |
| 4/23/2010 23:11:01 | 25.172 | 5/28/2010 14:39:00 | 25.5 | 4/24/2010 21:09:01 | 26.512 |
| 4/23/2010 23:31:01 | 25.172 | 5/28/2010 15:14:00 | 25.5 | 4/24/2010 21:29:01 | 26.512 |
| 4/23/2010 23:51:01 | 25.172 | 5/28/2010 15:49:00 | 25.5 | 4/24/2010 21:49:01 | 26.512 |
| 4/24/2010 00:11:01 | 25.172 | 5/28/2010 16:24:00 | 25.5 | 4/24/2010 22:09:01 | 26.512 |

|                    |        |                    |      |                    |        |
|--------------------|--------|--------------------|------|--------------------|--------|
| 4/24/2010 00:31:01 | 25.172 | 5/28/2010 16:59:00 | 25.5 | 4/24/2010 22:29:01 | 26.512 |
| 4/24/2010 00:51:01 | 25.172 | 5/28/2010 17:34:00 | 25.5 | 4/24/2010 22:49:01 | 26.512 |
| 4/24/2010 01:11:01 | 25.172 | 5/28/2010 18:09:00 | 25.5 | 4/24/2010 23:09:01 | 26.512 |
| 4/24/2010 01:31:01 | 25.172 | 5/28/2010 18:44:00 | 25.5 | 4/24/2010 23:29:01 | 26.512 |
| 4/24/2010 01:51:01 | 25.234 | 5/28/2010 19:19:00 | 25.5 | 4/24/2010 23:49:01 | 26.512 |
| 4/24/2010 02:11:01 | 25.234 | 5/28/2010 19:54:00 | 25.5 | 4/25/2010 00:09:01 | 26.512 |
| 4/24/2010 02:31:01 | 25.234 | 5/28/2010 20:29:00 | 25.5 | 4/25/2010 00:29:01 | 26.512 |
| 4/24/2010 02:51:01 | 25.234 | 5/28/2010 21:04:00 | 25.5 | 4/25/2010 00:49:01 | 26.512 |
| 4/24/2010 03:11:01 | 25.234 | 5/28/2010 21:39:00 | 25.5 | 4/25/2010 01:09:01 | 26.512 |
| 4/24/2010 03:31:01 | 25.234 | 5/28/2010 22:14:00 | 25.5 | 4/25/2010 01:29:01 | 26.512 |
| 4/24/2010 03:51:01 | 25.234 | 5/28/2010 22:49:00 | 25.5 | 4/25/2010 01:49:01 | 26.512 |
| 4/24/2010 04:11:01 | 25.234 | 5/28/2010 23:24:00 | 25.5 | 4/25/2010 02:09:01 | 26.512 |
| 4/24/2010 04:31:01 | 25.234 | 5/28/2010 23:59:00 | 25.5 | 4/25/2010 02:29:01 | 26.512 |
| 4/24/2010 04:51:01 | 25.234 | 5/29/2010 00:34:00 | 25.5 | 4/25/2010 02:49:01 | 26.512 |
| 4/24/2010 05:11:01 | 25.234 | 5/29/2010 01:09:00 | 25.5 | 4/25/2010 03:09:01 | 26.512 |
| 4/24/2010 05:31:01 | 25.234 | 5/29/2010 01:44:00 | 25.5 | 4/25/2010 03:29:01 | 26.512 |
| 4/24/2010 05:51:01 | 25.234 | 5/29/2010 02:19:00 | 25.5 | 4/25/2010 03:49:01 | 26.574 |
| 4/24/2010 06:11:01 | 25.234 | 5/29/2010 02:54:00 | 25.5 | 4/25/2010 04:09:01 | 26.574 |
| 4/24/2010 06:31:01 | 25.234 | 5/29/2010 03:29:00 | 25.5 | 4/25/2010 04:29:01 | 26.574 |
| 4/24/2010 06:51:01 | 25.234 | 5/29/2010 04:04:00 | 25.5 | 4/25/2010 04:49:01 | 26.574 |
| 4/24/2010 07:11:01 | 25.234 | 5/29/2010 04:39:00 | 25.5 | 4/25/2010 05:09:01 | 26.574 |
| 4/24/2010 07:31:01 | 25.234 | 5/29/2010 05:14:00 | 25.5 | 4/25/2010 05:29:01 | 26.574 |
| 4/24/2010 07:51:01 | 25.234 | 5/29/2010 05:49:00 | 25.5 | 4/25/2010 05:49:01 | 26.574 |
| 4/24/2010 08:11:01 | 25.234 | 5/29/2010 06:24:00 | 25.5 | 4/25/2010 06:09:01 | 26.574 |
| 4/24/2010 08:31:01 | 25.234 | 5/29/2010 06:59:00 | 25.0 | 4/25/2010 06:29:01 | 26.574 |
| 4/24/2010 08:51:01 | 25.234 | 5/29/2010 07:34:00 | 25.0 | 4/25/2010 06:49:01 | 26.574 |
| 4/24/2010 09:11:01 | 25.234 | 5/29/2010 08:09:00 | 25.0 | 4/25/2010 07:09:01 | 26.574 |
| 4/24/2010 09:31:01 | 25.234 | 5/29/2010 08:44:00 | 25.0 | 4/25/2010 07:29:01 | 26.574 |
| 4/24/2010 09:51:01 | 25.234 | 5/29/2010 09:19:00 | 25.0 | 4/25/2010 07:49:01 | 26.574 |
| 4/24/2010 10:11:01 | 25.234 | 5/29/2010 09:54:00 | 25.0 | 4/25/2010 08:09:01 | 26.574 |
| 4/24/2010 10:31:01 | 25.234 | 5/29/2010 10:29:00 | 25.0 | 4/25/2010 08:29:01 | 26.574 |
| 4/24/2010 10:51:01 | 25.234 | 5/29/2010 11:04:00 | 25.0 | 4/25/2010 08:49:01 | 26.574 |
| 4/24/2010 11:11:01 | 25.234 | 5/29/2010 11:39:00 | 25.0 | 4/25/2010 09:09:01 | 26.574 |
| 4/24/2010 11:31:01 | 25.234 | 5/29/2010 12:14:00 | 25.0 | 4/25/2010 09:29:01 | 26.574 |
| 4/24/2010 11:51:01 | 25.234 | 5/29/2010 12:49:00 | 25.0 | 4/25/2010 09:49:01 | 26.574 |
| 4/24/2010 12:11:01 | 25.234 | 5/29/2010 13:24:00 | 25.0 | 4/25/2010 10:09:01 | 26.574 |
| 4/24/2010 12:31:01 | 25.234 | 5/29/2010 13:59:00 | 25.0 | 4/25/2010 10:29:01 | 26.574 |
| 4/24/2010 12:51:01 | 25.234 | 5/29/2010 14:34:00 | 25.0 | 4/25/2010 10:49:01 | 26.574 |
| 4/24/2010 13:11:01 | 25.234 | 5/29/2010 15:09:00 | 25.0 | 4/25/2010 11:09:01 | 26.574 |
| 4/24/2010 13:31:01 | 25.234 | 5/29/2010 15:44:00 | 25.5 | 4/25/2010 11:29:01 | 26.574 |
| 4/24/2010 13:51:01 | 25.234 | 5/29/2010 16:19:00 | 25.5 | 4/25/2010 11:49:01 | 26.574 |
| 4/24/2010 14:11:01 | 25.234 | 5/29/2010 16:54:00 | 25.5 | 4/25/2010 12:09:01 | 26.574 |
| 4/24/2010 14:31:01 | 25.172 | 5/29/2010 17:29:00 | 25.5 | 4/25/2010 12:29:01 | 26.574 |
| 4/24/2010 14:51:01 | 25.172 | 5/29/2010 18:04:00 | 25.5 | 4/25/2010 12:49:01 | 26.574 |
| 4/24/2010 15:11:01 | 25.172 | 5/29/2010 18:39:00 | 25.5 | 4/25/2010 13:09:01 | 26.574 |
| 4/24/2010 15:31:01 | 25.172 | 5/29/2010 19:14:00 | 25.5 | 4/25/2010 13:29:01 | 26.574 |
| 4/24/2010 15:51:01 | 25.172 | 5/29/2010 19:49:00 | 25.5 | 4/25/2010 13:49:01 | 26.574 |
| 4/24/2010 16:11:01 | 25.172 | 5/29/2010 20:24:00 | 25.5 | 4/25/2010 14:09:01 | 26.574 |
| 4/24/2010 16:31:01 | 25.172 | 5/29/2010 20:59:00 | 25.5 | 4/25/2010 14:29:01 | 26.574 |
| 4/24/2010 16:51:01 | 25.172 | 5/29/2010 21:34:00 | 25.5 | 4/25/2010 14:49:01 | 26.574 |



|                    |        |                    |      |                    |        |
|--------------------|--------|--------------------|------|--------------------|--------|
| 4/24/2010 17:11:01 | 25.172 | 5/29/2010 22:09:00 | 25.5 | 4/25/2010 15:09:01 | 26.574 |
| 4/24/2010 17:31:01 | 25.234 | 5/29/2010 22:44:00 | 25.5 | 4/25/2010 15:29:01 | 26.574 |
| 4/24/2010 17:51:01 | 25.172 | 5/29/2010 23:19:00 | 25.5 | 4/25/2010 15:56:01 | 28.366 |
| 4/24/2010 18:11:01 | 25.234 | 5/29/2010 23:54:00 | 25.5 | 4/25/2010 16:16:01 | 27.741 |
| 4/24/2010 18:31:01 | 25.234 | 5/30/2010 00:29:00 | 25.5 | 4/25/2010 16:36:01 | 27.554 |
| 4/24/2010 18:51:01 | 25.234 | 5/30/2010 01:04:00 | 25.5 | 4/25/2010 16:56:01 | 27.429 |
| 4/24/2010 19:11:01 | 25.234 | 5/30/2010 01:39:00 | 25.5 | 4/25/2010 17:16:01 | 27.366 |
| 4/24/2010 19:31:01 | 25.234 | 5/30/2010 02:14:00 | 25.5 | 4/25/2010 17:36:01 | 27.241 |
| 4/24/2010 19:51:01 | 25.234 | 5/30/2010 02:49:00 | 25.5 | 4/25/2010 17:56:01 | 27.179 |
| 4/24/2010 20:11:01 | 25.234 | 5/30/2010 03:24:00 | 25.5 | 4/25/2010 18:16:01 | 27.116 |
| 4/24/2010 20:31:01 | 25.234 | 5/30/2010 03:59:00 | 25.0 | 4/25/2010 18:36:01 | 27.054 |
| 4/24/2010 20:51:01 | 25.234 | 5/30/2010 04:34:00 | 25.0 | 4/25/2010 18:56:01 | 26.991 |
| 4/24/2010 21:11:01 | 25.234 | 5/30/2010 05:09:00 | 25.0 | 4/25/2010 19:16:01 | 26.991 |
| 4/24/2010 21:31:01 | 25.234 | 5/30/2010 05:44:00 | 25.0 | 4/25/2010 19:36:01 | 26.991 |
| 4/24/2010 21:51:01 | 25.234 | 5/30/2010 06:19:00 | 25.0 | 4/25/2010 19:56:01 | 26.929 |
| 4/24/2010 22:11:01 | 25.234 | 5/30/2010 06:54:00 | 25.0 | 4/25/2010 20:16:01 | 26.929 |
| 4/24/2010 22:31:01 | 25.234 | 5/30/2010 07:29:00 | 25.0 | 4/25/2010 20:36:01 | 26.929 |
| 4/24/2010 22:51:01 | 25.234 | 5/30/2010 08:04:00 | 25.0 | 4/25/2010 20:56:01 | 26.929 |
| 4/24/2010 23:11:01 | 25.234 | 5/30/2010 08:39:00 | 25.0 | 4/25/2010 21:16:01 | 26.929 |
| 4/24/2010 23:31:01 | 25.297 | 5/30/2010 09:14:00 | 25.0 | 4/25/2010 21:36:01 | 26.929 |
| 4/24/2010 23:51:01 | 25.297 | 5/30/2010 09:49:00 | 25.0 | 4/25/2010 21:56:01 | 26.929 |
| 4/25/2010 00:11:01 | 25.297 | 5/30/2010 10:24:00 | 25.0 | 4/25/2010 22:16:01 | 26.929 |
| 4/25/2010 00:31:01 | 25.297 | 5/30/2010 10:59:00 | 25.0 | 4/25/2010 22:36:01 | 26.929 |
| 4/25/2010 00:51:01 | 25.297 | 5/30/2010 11:34:00 | 25.0 | 4/25/2010 22:56:01 | 26.929 |
| 4/25/2010 01:11:01 | 25.297 | 5/30/2010 12:09:00 | 25.0 | 4/25/2010 23:16:01 | 26.929 |
| 4/25/2010 01:31:01 | 25.297 | 5/30/2010 12:44:00 | 25.0 | 4/25/2010 23:36:01 | 26.929 |
| 4/25/2010 01:51:01 | 25.297 | 5/30/2010 13:19:00 | 25.0 | 4/25/2010 23:56:01 | 26.866 |
| 4/25/2010 02:11:01 | 25.297 | 5/30/2010 13:54:00 | 25.0 | 4/26/2010 00:16:01 | 26.866 |
| 4/25/2010 02:31:01 | 25.297 | 5/30/2010 14:29:00 | 25.0 | 4/26/2010 00:36:01 | 26.866 |
| 4/25/2010 02:51:01 | 25.297 | 5/30/2010 15:04:00 | 25.0 | 4/26/2010 00:56:01 | 26.866 |
| 4/25/2010 03:11:01 | 25.297 | 5/30/2010 15:39:00 | 25.0 | 4/26/2010 01:16:01 | 26.866 |
| 4/25/2010 03:31:01 | 25.297 | 5/30/2010 16:14:00 | 25.0 | 4/26/2010 01:36:01 | 26.866 |
| 4/25/2010 03:51:01 | 25.297 | 5/30/2010 16:49:00 | 25.0 | 4/26/2010 01:56:01 | 26.866 |
| 4/25/2010 04:11:01 | 25.297 | 5/30/2010 17:24:00 | 25.0 | 4/26/2010 02:16:01 | 26.866 |
| 4/25/2010 04:31:01 | 25.297 | 5/30/2010 17:59:00 | 25.0 | 4/26/2010 02:36:01 | 26.866 |
| 4/25/2010 04:51:01 | 25.297 | 5/30/2010 18:34:00 | 25.0 | 4/26/2010 02:56:01 | 26.866 |
| 4/25/2010 05:11:01 | 25.297 | 5/30/2010 19:09:00 | 25.0 | 4/26/2010 03:16:01 | 26.804 |
| 4/25/2010 05:31:01 | 25.297 | 5/30/2010 19:44:00 | 25.5 | 4/26/2010 03:36:01 | 26.804 |
| 4/25/2010 05:51:01 | 25.297 | 5/30/2010 20:19:00 | 25.5 | 4/26/2010 03:56:01 | 26.804 |
| 4/25/2010 06:11:01 | 25.297 | 5/30/2010 20:54:00 | 25.5 | 4/26/2010 04:16:01 | 26.804 |
| 4/25/2010 06:31:01 | 25.297 | 5/30/2010 21:29:00 | 25.5 | 4/26/2010 04:36:01 | 26.804 |
| 4/25/2010 06:51:01 | 25.297 | 5/30/2010 22:04:00 | 25.0 | 4/26/2010 04:56:01 | 26.804 |
| 4/25/2010 07:11:01 | 25.297 | 5/30/2010 22:39:00 | 25.0 | 4/26/2010 05:16:01 | 26.742 |
| 4/25/2010 07:31:01 | 25.297 | 5/30/2010 23:14:00 | 25.0 | 4/26/2010 05:36:01 | 26.742 |
| 4/25/2010 07:51:01 | 25.297 | 5/30/2010 23:49:00 | 25.0 | 4/26/2010 05:56:01 | 26.742 |
| 4/25/2010 08:11:01 | 25.297 | 5/31/2010 00:24:00 | 25.0 | 4/26/2010 06:16:01 | 26.742 |
| 4/25/2010 08:31:01 | 25.297 | 5/31/2010 00:59:00 | 25.0 | 4/26/2010 06:36:01 | 26.679 |
| 4/25/2010 08:51:01 | 25.297 | 5/31/2010 01:34:00 | 25.0 | 4/26/2010 06:56:01 | 26.679 |
| 4/25/2010 09:11:01 | 25.297 | 5/31/2010 02:09:00 | 25.0 | 4/26/2010 07:16:01 | 26.679 |
| 4/25/2010 09:31:01 | 25.297 | 5/31/2010 02:44:00 | 25.0 | 4/26/2010 07:36:01 | 26.679 |

|                    |        |                    |      |                    |        |
|--------------------|--------|--------------------|------|--------------------|--------|
| 4/25/2010 09:51:01 | 25.297 | 5/31/2010 03:19:00 | 25.0 | 4/26/2010 07:56:01 | 26.617 |
| 4/25/2010 10:11:01 | 25.297 | 5/31/2010 03:54:00 | 25.0 | 4/26/2010 08:16:01 | 26.617 |
| 4/25/2010 10:31:01 | 25.297 | 5/31/2010 04:29:00 | 25.0 | 4/26/2010 08:36:01 | 26.617 |
| 4/25/2010 10:51:01 | 25.297 | 5/31/2010 05:04:00 | 25.0 | 4/26/2010 08:56:01 | 26.617 |
| 4/25/2010 11:11:01 | 25.297 | 5/31/2010 05:39:00 | 25.0 | 4/26/2010 09:16:01 | 26.554 |
| 4/25/2010 11:31:01 | 25.234 | 5/31/2010 06:14:00 | 25.0 | 4/26/2010 09:36:01 | 26.554 |
| 4/25/2010 11:51:01 | 25.234 | 5/31/2010 06:49:00 | 25.0 | 4/26/2010 09:56:01 | 26.554 |
| 4/25/2010 12:11:01 | 25.234 | 5/31/2010 07:24:00 | 25.0 | 4/26/2010 10:16:01 | 26.554 |
| 4/25/2010 12:31:01 | 25.234 | 5/31/2010 07:59:00 | 24.5 | 4/26/2010 10:36:01 | 26.492 |
| 4/25/2010 12:51:01 | 26.3   | 5/31/2010 08:34:00 | 24.5 | 4/26/2010 10:56:01 | 26.492 |
| 4/25/2010 13:07:01 | 27.366 | 5/31/2010 09:09:00 | 24.5 | 4/26/2010 11:16:01 | 26.492 |
| 4/25/2010 13:27:01 | 26.617 | 5/31/2010 09:44:00 | 24.5 | 4/26/2010 11:36:01 | 26.492 |
| 4/25/2010 13:47:01 | 26.179 | 5/31/2010 10:19:00 | 24.5 | 4/26/2010 11:56:01 | 26.429 |
| 4/25/2010 14:07:01 | 25.992 | 5/31/2010 10:54:00 | 24.5 | 4/26/2010 12:16:01 | 26.429 |
| 4/25/2010 14:27:01 | 25.804 | 5/31/2010 11:29:00 | 24.5 | 4/26/2010 12:36:01 | 26.429 |
| 4/25/2010 14:47:01 | 25.679 | 5/31/2010 12:04:00 | 24.5 | 4/26/2010 12:56:01 | 26.429 |
| 4/25/2010 15:07:01 | 25.617 | 5/31/2010 12:39:00 | 24.5 | 4/26/2010 13:16:01 | 26.429 |
| 4/25/2010 15:27:01 | 25.617 | 5/31/2010 13:14:00 | 24.5 | 4/26/2010 13:36:01 | 26.429 |
| 4/25/2010 15:47:01 | 25.554 | 5/31/2010 13:49:00 | 24.5 | 4/26/2010 13:56:01 | 26.429 |
| 4/25/2010 16:07:01 | 25.554 | 5/31/2010 14:24:00 | 24.5 | 4/26/2010 14:16:01 | 26.429 |
| 4/25/2010 16:27:01 | 25.554 | 5/31/2010 14:59:00 | 25.0 | 4/26/2010 14:36:01 | 26.429 |
| 4/25/2010 16:47:01 | 25.554 | 5/31/2010 15:34:00 | 25.0 | 4/26/2010 14:56:01 | 26.429 |
| 4/25/2010 17:07:01 | 25.492 | 5/31/2010 16:09:00 | 25.0 | 4/26/2010 15:16:01 | 26.429 |
| 4/25/2010 17:27:01 | 25.554 | 5/31/2010 16:44:00 | 25.0 | 4/26/2010 15:36:01 | 26.429 |
| 4/25/2010 17:47:01 | 25.554 | 5/31/2010 17:19:00 | 25.0 | 4/26/2010 15:56:01 | 26.429 |
| 4/25/2010 18:07:01 | 25.554 | 5/31/2010 17:54:00 | 25.0 | 4/26/2010 16:16:01 | 26.429 |
| 4/25/2010 18:27:01 | 25.554 | 5/31/2010 18:29:00 | 25.0 | 4/26/2010 16:36:01 | 26.429 |
| 4/25/2010 18:47:01 | 25.554 | 5/31/2010 19:04:00 | 25.0 | 4/26/2010 16:56:01 | 26.492 |
| 4/25/2010 19:07:01 | 25.554 | 5/31/2010 19:39:00 | 25.0 | 4/26/2010 17:16:01 | 26.492 |
| 4/25/2010 19:27:01 | 25.492 | 5/31/2010 20:14:00 | 25.0 | 4/26/2010 17:36:01 | 26.492 |
| 4/25/2010 19:47:01 | 25.492 | 5/31/2010 20:49:00 | 25.0 | 4/26/2010 17:56:01 | 26.492 |
| 4/25/2010 20:07:01 | 25.492 | 5/31/2010 21:24:00 | 25.0 | 4/26/2010 18:16:01 | 26.554 |
| 4/25/2010 20:27:01 | 25.492 | 5/31/2010 21:59:00 | 25.0 | 4/26/2010 18:36:01 | 26.554 |
| 4/25/2010 20:47:01 | 25.492 | 5/31/2010 22:34:00 | 25.0 | 4/26/2010 18:56:01 | 26.554 |
| 4/25/2010 21:07:01 | 25.492 | 5/31/2010 23:09:00 | 25.0 | 4/26/2010 19:16:01 | 26.554 |
| 4/25/2010 21:27:01 | 25.429 | 5/31/2010 23:44:00 | 25.0 | 4/26/2010 19:36:01 | 26.617 |
| 4/25/2010 21:47:01 | 25.429 | 6/1/2010 00:19:00  | 25.0 | 4/26/2010 19:56:01 | 26.617 |
| 4/25/2010 22:07:01 | 25.429 | 6/1/2010 00:54:00  | 25.0 | 4/26/2010 20:16:01 | 26.617 |
| 4/25/2010 22:27:01 | 25.429 | 6/1/2010 01:29:00  | 25.0 | 4/26/2010 20:36:01 | 26.679 |
| 4/25/2010 22:47:01 | 25.367 | 6/1/2010 02:04:00  | 25.0 | 4/26/2010 20:56:01 | 26.679 |
| 4/25/2010 23:07:01 | 25.367 | 6/1/2010 02:39:00  | 25.0 | 4/26/2010 21:16:01 | 26.679 |
| 4/25/2010 23:27:01 | 25.367 | 6/1/2010 03:14:00  | 25.0 | 4/26/2010 21:36:01 | 26.679 |
| 4/25/2010 23:47:01 | 25.304 | 6/1/2010 03:49:00  | 25.0 | 4/26/2010 21:56:01 | 26.679 |
| 4/26/2010 00:07:01 | 25.304 | 6/1/2010 04:24:00  | 24.5 | 4/26/2010 22:16:01 | 26.742 |
| 4/26/2010 00:27:01 | 25.304 | 6/1/2010 04:59:00  | 24.5 | 4/26/2010 22:36:01 | 26.742 |
| 4/26/2010 00:47:01 | 25.242 | 6/1/2010 05:34:00  | 24.5 | 4/26/2010 22:56:01 | 26.742 |
| 4/26/2010 01:07:01 | 25.242 | 6/1/2010 06:09:00  | 24.5 | 4/26/2010 23:16:01 | 26.742 |
| 4/26/2010 01:27:01 | 25.242 | 6/1/2010 06:44:00  | 24.5 | 4/26/2010 23:36:01 | 26.742 |
| 4/26/2010 01:47:01 | 25.179 | 6/1/2010 07:19:00  | 24.5 | 4/26/2010 23:56:01 | 26.742 |
| 4/26/2010 02:07:01 | 25.179 | 6/1/2010 07:54:00  | 24.5 | 4/27/2010 00:16:01 | 26.804 |

|                    |        |                   |      |                    |        |
|--------------------|--------|-------------------|------|--------------------|--------|
| 4/26/2010 02:27:01 | 25.117 | 6/1/2010 08:29:00 | 24.5 | 4/27/2010 00:36:01 | 26.742 |
| 4/26/2010 02:47:01 | 25.117 | 6/1/2010 09:04:00 | 24.5 | 4/27/2010 00:56:01 | 26.804 |
| 4/26/2010 03:07:01 | 25.054 | 6/1/2010 09:39:00 | 24.5 | 4/27/2010 01:16:01 | 26.804 |
| 4/26/2010 03:27:01 | 25.054 | 6/1/2010 10:14:00 | 24.5 | 4/27/2010 01:36:01 | 26.804 |
| 4/26/2010 03:47:01 | 25.054 | 6/1/2010 10:49:00 | 24.5 | 4/27/2010 01:56:01 | 26.804 |
| 4/26/2010 04:07:01 | 24.992 | 6/1/2010 11:24:00 | 24.5 | 4/27/2010 02:16:01 | 26.804 |
| 4/26/2010 04:27:01 | 24.992 | 6/1/2010 11:59:00 | 24.5 | 4/27/2010 02:36:01 | 26.804 |
| 4/26/2010 04:47:01 | 24.929 | 6/1/2010 12:34:00 | 24.5 | 4/27/2010 02:56:01 | 26.804 |
| 4/26/2010 05:07:01 | 24.929 | 6/1/2010 13:09:00 | 24.5 | 4/27/2010 03:16:01 | 26.742 |
| 4/26/2010 05:27:01 | 24.867 | 6/1/2010 13:44:00 | 24.5 | 4/27/2010 03:36:01 | 26.742 |
| 4/26/2010 05:47:01 | 24.867 | 6/1/2010 14:19:00 | 24.5 | 4/27/2010 03:56:01 | 26.742 |
| 4/26/2010 06:07:01 | 24.804 | 6/1/2010 14:54:00 | 24.5 | 4/27/2010 04:16:01 | 26.742 |
| 4/26/2010 06:27:01 | 24.804 | 6/1/2010 15:29:00 | 25.0 | 4/27/2010 04:36:01 | 26.742 |
| 4/26/2010 06:47:01 | 24.804 | 6/1/2010 16:04:00 | 25.0 | 4/27/2010 04:56:01 | 26.742 |
| 4/26/2010 07:07:01 | 24.742 | 6/1/2010 16:39:00 | 25.0 | 4/27/2010 05:16:01 | 26.742 |
| 4/26/2010 07:27:01 | 24.742 | 6/1/2010 17:14:00 | 25.0 | 4/27/2010 05:36:01 | 26.742 |
| 4/26/2010 07:47:01 | 24.679 | 6/1/2010 17:49:00 | 25.0 | 4/27/2010 05:56:01 | 26.679 |
| 4/26/2010 08:07:01 | 24.679 | 6/1/2010 18:24:00 | 25.0 | 4/27/2010 06:16:01 | 26.679 |
| 4/26/2010 08:27:01 | 24.679 | 6/1/2010 18:59:00 | 25.0 | 4/27/2010 06:36:01 | 26.679 |
| 4/26/2010 08:47:01 | 24.617 | 6/1/2010 19:34:00 | 25.0 | 4/27/2010 06:56:01 | 26.679 |
| 4/26/2010 09:07:01 | 24.617 | 6/1/2010 20:09:00 | 25.0 | 4/27/2010 07:16:01 | 26.679 |
| 4/26/2010 09:27:01 | 24.554 | 6/1/2010 20:44:00 | 25.0 | 4/27/2010 07:36:01 | 26.617 |
| 4/26/2010 09:47:01 | 24.554 | 6/1/2010 21:19:00 | 25.0 | 4/27/2010 07:56:01 | 26.617 |
| 4/26/2010 10:07:01 | 24.554 | 6/1/2010 21:54:00 | 25.0 | 4/27/2010 08:16:01 | 26.617 |
| 4/26/2010 10:27:01 | 24.554 | 6/1/2010 22:29:00 | 25.0 | 4/27/2010 08:36:01 | 26.617 |
| 4/26/2010 10:47:01 | 24.554 | 6/1/2010 23:04:00 | 25.0 | 4/27/2010 08:56:01 | 26.554 |
| 4/26/2010 11:07:01 | 24.554 | 6/1/2010 23:39:00 | 25.0 | 4/27/2010 09:16:01 | 26.554 |
| 4/26/2010 11:27:01 | 24.554 | 6/2/2010 00:14:00 | 25.0 | 4/27/2010 09:36:01 | 26.554 |
| 4/26/2010 11:47:01 | 24.554 | 6/2/2010 00:49:00 | 25.0 | 4/27/2010 09:56:01 | 26.554 |
| 4/26/2010 12:07:01 | 24.554 | 6/2/2010 01:24:00 | 25.0 | 4/27/2010 10:16:01 | 26.492 |
| 4/26/2010 12:27:01 | 24.554 | 6/2/2010 01:59:00 | 25.0 | 4/27/2010 10:36:01 | 26.492 |
| 4/26/2010 12:47:01 | 24.554 | 6/2/2010 02:34:00 | 25.0 | 4/27/2010 10:56:01 | 26.492 |
| 4/26/2010 13:07:01 | 24.554 | 6/2/2010 03:09:00 | 25.0 | 4/27/2010 11:16:01 | 26.492 |
| 4/26/2010 13:27:01 | 24.617 | 6/2/2010 03:44:00 | 25.0 | 4/27/2010 11:36:01 | 26.429 |
| 4/26/2010 13:47:01 | 24.617 | 6/2/2010 04:19:00 | 25.0 | 4/27/2010 11:56:01 | 26.429 |
| 4/26/2010 14:07:01 | 24.679 | 6/2/2010 04:54:00 | 25.0 | 4/27/2010 12:16:01 | 26.429 |
| 4/26/2010 14:27:01 | 24.679 | 6/2/2010 05:29:00 | 24.5 | 4/27/2010 12:36:01 | 26.429 |
| 4/26/2010 14:47:01 | 24.742 | 6/2/2010 06:04:00 | 24.5 | 4/27/2010 12:56:01 | 26.429 |
| 4/26/2010 15:07:01 | 24.804 | 6/2/2010 06:39:00 | 24.5 | 4/27/2010 13:16:01 | 26.429 |
| 4/26/2010 15:27:01 | 24.804 | 6/2/2010 07:14:00 | 24.5 | 4/27/2010 13:36:01 | 26.429 |
| 4/26/2010 15:47:01 | 24.867 | 6/2/2010 07:49:00 | 24.5 | 4/27/2010 13:56:01 | 26.367 |
| 4/26/2010 16:07:01 | 24.929 | 6/2/2010 08:24:00 | 24.5 | 4/27/2010 14:16:01 | 26.367 |
| 4/26/2010 16:27:01 | 24.929 | 6/2/2010 08:59:00 | 24.5 | 4/27/2010 14:36:01 | 26.367 |
| 4/26/2010 16:47:01 | 24.992 | 6/2/2010 09:34:00 | 24.5 | 4/27/2010 14:56:01 | 26.429 |
| 4/26/2010 17:07:01 | 24.992 | 6/2/2010 10:09:00 | 24.5 | 4/27/2010 15:16:01 | 26.429 |
| 4/26/2010 17:27:01 | 25.054 | 6/2/2010 10:44:00 | 24.5 | 4/27/2010 15:36:01 | 26.429 |
| 4/26/2010 17:47:01 | 25.117 | 6/2/2010 11:19:00 | 24.5 | 4/27/2010 15:56:01 | 26.429 |
| 4/26/2010 18:07:01 | 25.117 | 6/2/2010 11:54:00 | 24.5 | 4/27/2010 16:16:01 | 26.429 |
| 4/26/2010 18:27:01 | 25.179 | 6/2/2010 12:29:00 | 24.5 | 4/27/2010 16:36:01 | 26.429 |
| 4/26/2010 18:47:01 | 25.179 | 6/2/2010 13:04:00 | 24.5 | 4/27/2010 16:56:01 | 26.429 |

|                    |        |                   |      |                    |        |
|--------------------|--------|-------------------|------|--------------------|--------|
| 4/26/2010 19:07:01 | 25.179 | 6/2/2010 13:39:00 | 24.5 | 4/27/2010 17:16:01 | 26.429 |
| 4/26/2010 19:27:01 | 25.242 | 6/2/2010 14:14:00 | 24.5 | 4/27/2010 17:36:01 | 26.492 |
| 4/26/2010 19:47:01 | 25.242 | 6/2/2010 14:49:00 | 24.5 | 4/27/2010 17:56:01 | 26.492 |
| 4/26/2010 20:07:01 | 25.242 | 6/2/2010 15:24:00 | 24.5 | 4/27/2010 18:16:01 | 26.492 |
| 4/26/2010 20:27:01 | 25.242 | 6/2/2010 15:59:00 | 24.5 | 4/27/2010 18:36:01 | 26.554 |
| 4/26/2010 20:47:01 | 25.242 | 6/2/2010 16:34:00 | 25.0 | 4/27/2010 18:56:01 | 26.554 |
| 4/26/2010 21:07:01 | 25.242 | 6/2/2010 17:09:00 | 25.0 | 4/27/2010 19:16:01 | 26.554 |
| 4/26/2010 21:27:01 | 25.242 | 6/2/2010 17:44:00 | 25.0 | 4/27/2010 19:36:01 | 26.554 |
| 4/26/2010 21:47:01 | 25.242 | 6/2/2010 18:19:00 | 25.0 | 4/27/2010 19:56:01 | 26.617 |
| 4/26/2010 22:07:01 | 25.242 | 6/2/2010 18:54:00 | 25.0 | 4/27/2010 20:16:01 | 26.617 |
| 4/26/2010 22:27:01 | 25.242 | 6/2/2010 19:29:00 | 25.0 | 4/27/2010 20:36:01 | 26.679 |
| 4/26/2010 22:47:01 | 25.242 | 6/2/2010 20:04:00 | 25.0 | 4/27/2010 20:56:01 | 26.679 |
| 4/26/2010 23:07:01 | 25.242 | 6/2/2010 20:39:00 | 25.0 | 4/27/2010 21:16:01 | 26.679 |
| 4/26/2010 23:27:01 | 25.179 | 6/2/2010 21:14:00 | 25.0 | 4/27/2010 21:36:01 | 26.679 |
| 4/26/2010 23:47:01 | 25.179 | 6/2/2010 21:49:00 | 25.0 | 4/27/2010 21:56:01 | 26.742 |
| 4/27/2010 00:07:01 | 25.179 | 6/2/2010 22:24:00 | 25.0 | 4/27/2010 22:16:01 | 26.742 |
| 4/27/2010 00:27:01 | 25.179 | 6/2/2010 22:59:00 | 25.0 | 4/27/2010 22:36:01 | 26.742 |
| 4/27/2010 00:47:01 | 25.179 | 6/2/2010 23:34:00 | 25.0 | 4/27/2010 22:56:01 | 26.742 |
| 4/27/2010 01:07:01 | 25.117 | 6/3/2010 00:09:00 | 25.0 | 4/27/2010 23:16:01 | 26.804 |
| 4/27/2010 01:27:01 | 25.117 | 6/3/2010 00:44:00 | 25.0 | 4/27/2010 23:36:01 | 26.804 |
| 4/27/2010 01:47:01 | 25.117 | 6/3/2010 01:19:00 | 25.0 | 4/27/2010 23:56:01 | 26.804 |
| 4/27/2010 02:07:01 | 25.054 | 6/3/2010 01:54:00 | 25.0 | 4/28/2010 00:16:01 | 26.804 |
| 4/27/2010 02:27:01 | 25.054 | 6/3/2010 02:29:00 | 25.0 | 4/28/2010 00:36:01 | 26.804 |
| 4/27/2010 02:47:01 | 25.054 | 6/3/2010 03:04:00 | 25.0 | 4/28/2010 00:56:01 | 26.804 |
| 4/27/2010 03:07:01 | 24.992 | 6/3/2010 03:39:00 | 25.0 | 4/28/2010 01:16:01 | 26.804 |
| 4/27/2010 03:27:01 | 24.992 | 6/3/2010 04:14:00 | 25.0 | 4/28/2010 01:36:01 | 26.804 |
| 4/27/2010 03:47:01 | 24.992 | 6/3/2010 04:49:00 | 25.0 | 4/28/2010 01:56:01 | 26.804 |
| 4/27/2010 04:07:01 | 24.929 | 6/3/2010 05:24:00 | 25.0 | 4/28/2010 02:16:01 | 26.804 |
| 4/27/2010 04:27:01 | 24.929 | 6/3/2010 05:59:00 | 25.0 | 4/28/2010 02:36:01 | 26.804 |
| 4/27/2010 04:47:01 | 24.929 | 6/3/2010 06:34:00 | 25.0 | 4/28/2010 02:56:01 | 26.804 |
| 4/27/2010 05:07:01 | 24.867 | 6/3/2010 07:09:00 | 25.0 | 4/28/2010 03:16:01 | 26.804 |
| 4/27/2010 05:27:01 | 24.867 | 6/3/2010 07:44:00 | 24.5 | 4/28/2010 03:36:01 | 26.804 |
| 4/27/2010 05:47:01 | 24.804 | 6/3/2010 08:19:00 | 24.5 | 4/28/2010 03:56:01 | 26.804 |
| 4/27/2010 06:07:01 | 24.804 | 6/3/2010 08:54:00 | 24.5 | 4/28/2010 04:16:01 | 26.804 |
| 4/27/2010 06:27:01 | 24.804 | 6/3/2010 09:29:00 | 24.5 | 4/28/2010 04:36:01 | 26.804 |
| 4/27/2010 06:47:01 | 24.742 | 6/3/2010 10:04:00 | 24.5 | 4/28/2010 04:56:01 | 26.804 |
| 4/27/2010 07:07:01 | 24.742 | 6/3/2010 10:39:00 | 24.5 | 4/28/2010 05:16:01 | 26.804 |
| 4/27/2010 07:27:01 | 24.679 | 6/3/2010 11:14:00 | 24.5 | 4/28/2010 05:36:01 | 26.804 |
| 4/27/2010 07:47:01 | 24.679 | 6/3/2010 11:49:00 | 24.5 | 4/28/2010 05:56:01 | 26.804 |
| 4/27/2010 08:07:01 | 24.617 | 6/3/2010 12:24:00 | 24.5 | 4/28/2010 06:16:01 | 26.804 |
| 4/27/2010 08:27:01 | 24.617 | 6/3/2010 12:59:00 | 24.5 | 4/28/2010 06:36:01 | 26.804 |
| 4/27/2010 08:47:01 | 24.617 | 6/3/2010 13:34:00 | 24.5 | 4/28/2010 06:56:01 | 26.742 |
| 4/27/2010 09:07:01 | 24.554 | 6/3/2010 14:09:00 | 24.5 | 4/28/2010 07:16:01 | 26.742 |
| 4/27/2010 09:27:01 | 24.554 | 6/3/2010 14:44:00 | 25.0 | 4/28/2010 07:36:01 | 26.742 |
| 4/27/2010 09:47:01 | 24.554 | 6/3/2010 15:19:00 | 25.0 | 4/28/2010 07:56:01 | 26.742 |
| 4/27/2010 10:07:01 | 24.492 | 6/3/2010 15:54:00 | 25.0 | 4/28/2010 08:16:01 | 26.742 |
| 4/27/2010 10:27:01 | 24.492 | 6/3/2010 16:29:00 | 25.0 | 4/28/2010 08:36:01 | 26.679 |
| 4/27/2010 10:47:01 | 24.492 | 6/3/2010 17:04:00 | 25.0 | 4/28/2010 08:56:01 | 26.679 |
| 4/27/2010 11:07:01 | 24.492 | 6/3/2010 17:39:00 | 25.0 | 4/28/2010 09:16:01 | 26.679 |
| 4/27/2010 11:27:01 | 24.492 | 6/3/2010 18:14:00 | 25.0 | 4/28/2010 09:36:01 | 26.679 |

|                    |        |                   |      |                    |        |
|--------------------|--------|-------------------|------|--------------------|--------|
| 4/27/2010 11:47:01 | 24.492 | 6/3/2010 18:49:00 | 25.0 | 4/28/2010 09:56:01 | 26.679 |
| 4/27/2010 12:07:01 | 24.492 | 6/3/2010 19:24:00 | 25.0 | 4/28/2010 10:16:01 | 26.617 |
| 4/27/2010 12:27:01 | 24.492 | 6/3/2010 19:59:00 | 25.0 | 4/28/2010 10:36:01 | 26.617 |
| 4/27/2010 12:47:01 | 24.492 | 6/3/2010 20:34:00 | 25.0 | 4/28/2010 10:56:01 | 26.617 |
| 4/27/2010 13:07:01 | 24.554 | 6/3/2010 21:09:00 | 25.0 | 4/28/2010 11:16:01 | 26.617 |
| 4/27/2010 13:27:01 | 24.554 | 6/3/2010 21:44:00 | 25.0 | 4/28/2010 11:36:01 | 26.617 |
| 4/27/2010 13:47:01 | 24.554 | 6/3/2010 22:19:00 | 25.0 | 4/28/2010 11:56:01 | 26.554 |
| 4/27/2010 14:07:01 | 24.617 | 6/3/2010 22:54:00 | 25.0 | 4/28/2010 12:16:01 | 26.554 |
| 4/27/2010 14:27:01 | 24.679 | 6/3/2010 23:29:00 | 25.0 | 4/28/2010 12:36:01 | 26.554 |
| 4/27/2010 14:47:01 | 24.679 | 6/4/2010 00:04:00 | 25.0 | 4/28/2010 12:56:01 | 26.554 |
| 4/27/2010 15:07:01 | 24.742 | 6/4/2010 00:39:00 | 25.0 | 4/28/2010 13:16:01 | 26.554 |
| 4/27/2010 15:27:01 | 24.804 | 6/4/2010 01:14:00 | 25.0 | 4/28/2010 13:36:01 | 26.554 |
| 4/27/2010 15:47:01 | 24.867 | 6/4/2010 01:49:00 | 24.5 | 4/28/2010 13:56:01 | 26.554 |
| 4/27/2010 16:07:01 | 24.867 | 6/4/2010 02:24:00 | 24.5 | 4/28/2010 14:16:01 | 26.554 |
| 4/27/2010 16:27:01 | 24.929 | 6/4/2010 02:59:00 | 24.5 | 4/28/2010 14:36:01 | 26.554 |
| 4/27/2010 16:47:01 | 24.992 | 6/4/2010 03:34:00 | 24.5 | 4/28/2010 14:56:01 | 26.554 |
| 4/27/2010 17:07:01 | 24.992 | 6/4/2010 04:09:00 | 24.5 | 4/28/2010 15:16:01 | 26.554 |
| 4/27/2010 17:27:01 | 25.054 | 6/4/2010 04:44:00 | 24.5 | 4/28/2010 15:36:01 | 26.554 |
| 4/27/2010 17:47:01 | 25.117 | 6/4/2010 05:19:00 | 24.5 | 4/28/2010 15:56:01 | 26.554 |
| 4/27/2010 18:07:01 | 25.117 | 6/4/2010 05:54:00 | 24.5 | 4/28/2010 16:16:01 | 26.554 |
| 4/27/2010 18:27:01 | 25.179 | 6/4/2010 06:29:00 | 24.5 | 4/28/2010 16:36:01 | 26.617 |
| 4/27/2010 18:47:01 | 25.179 | 6/4/2010 07:04:00 | 24.5 | 4/28/2010 16:56:01 | 26.617 |
| 4/27/2010 19:07:01 | 25.242 | 6/4/2010 07:39:00 | 24.5 | 4/28/2010 17:16:01 | 26.617 |
| 4/27/2010 19:27:01 | 25.242 | 6/4/2010 08:14:00 | 24.0 | 4/28/2010 17:36:01 | 26.617 |
| 4/27/2010 19:47:01 | 25.242 | 6/4/2010 08:49:00 | 24.0 | 4/28/2010 17:56:01 | 26.617 |
| 4/27/2010 20:07:01 | 25.242 | 6/4/2010 09:24:00 | 24.0 | 4/28/2010 18:16:01 | 26.679 |
| 4/27/2010 20:27:01 | 25.304 | 6/4/2010 09:59:00 | 24.0 | 4/28/2010 18:36:01 | 26.679 |
| 4/27/2010 20:47:01 | 25.304 | 6/4/2010 10:34:00 | 24.0 | 4/28/2010 18:56:01 | 26.679 |
| 4/27/2010 21:07:01 | 25.304 | 6/4/2010 11:09:00 | 24.0 | 4/28/2010 19:16:01 | 26.742 |
| 4/27/2010 21:27:01 | 25.304 | 6/4/2010 11:44:00 | 24.0 | 4/28/2010 19:36:01 | 26.742 |
| 4/27/2010 21:47:01 | 25.304 | 6/4/2010 12:19:00 | 24.0 | 4/28/2010 19:56:01 | 26.742 |
| 4/27/2010 22:07:01 | 25.304 | 6/4/2010 12:54:00 | 24.0 | 4/28/2010 20:16:01 | 26.742 |
| 4/27/2010 22:27:01 | 25.304 | 6/4/2010 13:29:00 | 24.0 | 4/28/2010 20:36:01 | 26.804 |
| 4/27/2010 22:47:01 | 25.242 | 6/4/2010 14:04:00 | 24.0 | 4/28/2010 20:56:01 | 26.804 |
| 4/27/2010 23:07:01 | 25.242 | 6/4/2010 14:39:00 | 24.0 | 4/28/2010 21:16:01 | 26.804 |
| 4/27/2010 23:27:01 | 25.242 | 6/4/2010 15:14:00 | 24.0 | 4/28/2010 21:36:01 | 26.866 |
| 4/27/2010 23:47:01 | 25.242 | 6/4/2010 15:49:00 | 24.0 | 4/28/2010 21:56:01 | 26.866 |
| 4/28/2010 00:07:01 | 25.242 | 6/4/2010 16:24:00 | 24.5 | 4/28/2010 22:16:01 | 26.866 |
| 4/28/2010 00:27:01 | 25.179 | 6/4/2010 16:59:00 | 24.5 | 4/28/2010 22:36:01 | 26.866 |
| 4/28/2010 00:47:01 | 25.179 | 6/4/2010 17:34:00 | 24.5 | 4/28/2010 22:56:01 | 26.929 |
| 4/28/2010 01:07:01 | 25.179 | 6/4/2010 18:09:00 | 24.5 | 4/28/2010 23:16:01 | 26.929 |
| 4/28/2010 01:27:01 | 25.179 | 6/4/2010 18:44:00 | 24.5 | 4/28/2010 23:36:01 | 26.929 |
| 4/28/2010 01:47:01 | 25.179 | 6/4/2010 19:19:00 | 24.5 | 4/28/2010 23:56:01 | 26.929 |
| 4/28/2010 02:07:01 | 25.179 | 6/4/2010 19:54:00 | 24.5 | 4/29/2010 00:16:01 | 26.929 |
| 4/28/2010 02:27:01 | 25.117 | 6/4/2010 20:29:00 | 24.5 | 4/29/2010 00:36:01 | 26.929 |
| 4/28/2010 02:47:01 | 25.117 | 6/4/2010 21:04:00 | 24.5 | 4/29/2010 00:56:01 | 26.929 |
| 4/28/2010 03:07:01 | 25.117 | 6/4/2010 21:39:00 | 24.5 | 4/29/2010 01:16:01 | 26.929 |
| 4/28/2010 03:27:01 | 25.117 | 6/4/2010 22:14:00 | 24.5 | 4/29/2010 01:36:01 | 26.991 |
| 4/28/2010 03:47:01 | 25.054 | 6/4/2010 22:49:00 | 24.5 | 4/29/2010 01:56:01 | 26.929 |
| 4/28/2010 04:07:01 | 25.054 | 6/4/2010 23:24:00 | 24.5 | 4/29/2010 02:16:01 | 26.991 |

|                    |        |                   |      |                    |        |
|--------------------|--------|-------------------|------|--------------------|--------|
| 4/28/2010 04:27:01 | 25.054 | 6/4/2010 23:59:00 | 24.5 | 4/29/2010 02:36:01 | 26.991 |
| 4/28/2010 04:47:01 | 25.054 | 6/5/2010 00:34:00 | 24.5 | 4/29/2010 02:56:01 | 26.991 |
| 4/28/2010 05:07:01 | 25.054 | 6/5/2010 01:09:00 | 24.5 | 4/29/2010 03:16:01 | 26.991 |
| 4/28/2010 05:27:01 | 24.992 | 6/5/2010 01:44:00 | 24.5 | 4/29/2010 03:36:01 | 26.929 |
| 4/28/2010 05:47:01 | 24.992 | 6/5/2010 02:19:00 | 24.5 | 4/29/2010 03:56:01 | 26.929 |
| 4/28/2010 06:07:01 | 24.992 | 6/5/2010 02:54:00 | 24.5 | 4/29/2010 04:16:01 | 26.929 |
| 4/28/2010 06:27:01 | 24.992 | 6/5/2010 03:29:00 | 24.5 | 4/29/2010 04:36:01 | 26.929 |
| 4/28/2010 06:47:01 | 24.929 | 6/5/2010 04:04:00 | 24.0 | 4/29/2010 04:56:01 | 26.929 |
| 4/28/2010 07:07:01 | 24.929 | 6/5/2010 04:39:00 | 24.5 | 4/29/2010 05:16:01 | 26.929 |
| 4/28/2010 07:27:01 | 24.929 | 6/5/2010 05:14:00 | 24.5 | 4/29/2010 05:36:01 | 26.929 |
| 4/28/2010 07:47:01 | 24.867 | 6/5/2010 05:49:00 | 24.5 | 4/29/2010 05:56:01 | 26.929 |
| 4/28/2010 08:07:01 | 24.867 | 6/5/2010 06:24:00 | 24.5 | 4/29/2010 06:16:01 | 26.929 |
| 4/28/2010 08:27:01 | 24.867 | 6/5/2010 06:59:00 | 24.0 | 4/29/2010 06:36:01 | 26.866 |
| 4/28/2010 08:47:01 | 24.867 | 6/5/2010 07:34:00 | 24.0 | 4/29/2010 06:56:01 | 26.866 |
| 4/28/2010 09:07:01 | 24.804 | 6/5/2010 08:09:00 | 24.0 | 4/29/2010 07:16:01 | 26.866 |
| 4/28/2010 09:27:01 | 24.804 | 6/5/2010 08:44:00 | 24.0 | 4/29/2010 07:36:01 | 26.866 |
| 4/28/2010 09:47:01 | 24.804 | 6/5/2010 09:19:00 | 24.0 | 4/29/2010 07:56:01 | 26.866 |
| 4/28/2010 10:07:01 | 24.804 | 6/5/2010 09:54:00 | 24.0 | 4/29/2010 08:16:01 | 26.804 |
| 4/28/2010 10:27:01 | 24.804 | 6/5/2010 10:29:00 | 24.0 | 4/29/2010 08:36:01 | 26.804 |
| 4/28/2010 10:47:01 | 24.804 | 6/5/2010 11:04:00 | 24.0 | 4/29/2010 08:56:01 | 26.804 |
| 4/28/2010 11:07:01 | 24.742 | 6/5/2010 11:39:00 | 24.0 | 4/29/2010 09:16:01 | 26.804 |
| 4/28/2010 11:27:01 | 24.804 | 6/5/2010 12:14:00 | 24.0 | 4/29/2010 09:36:01 | 26.804 |
| 4/28/2010 11:47:01 | 24.742 | 6/5/2010 12:49:00 | 24.0 | 4/29/2010 09:56:01 | 26.742 |
| 4/28/2010 12:07:01 | 24.804 | 6/5/2010 13:24:00 | 24.0 | 4/29/2010 10:16:01 | 26.742 |
| 4/28/2010 12:27:01 | 24.804 | 6/5/2010 13:59:00 | 24.0 | 4/29/2010 10:36:01 | 26.742 |
| 4/28/2010 12:47:01 | 24.804 | 6/5/2010 14:34:00 | 24.0 | 4/29/2010 10:56:01 | 26.679 |
| 4/28/2010 13:07:01 | 24.804 | 6/5/2010 15:09:00 | 24.0 | 4/29/2010 11:16:01 | 26.679 |
| 4/28/2010 13:27:01 | 24.867 | 6/5/2010 15:44:00 | 24.5 | 4/29/2010 11:36:01 | 26.679 |
| 4/28/2010 13:47:01 | 24.867 | 6/5/2010 16:19:00 | 24.5 | 4/29/2010 11:56:01 | 26.679 |
| 4/28/2010 14:07:01 | 24.929 | 6/5/2010 16:54:00 | 24.5 | 4/29/2010 12:16:01 | 26.617 |
| 4/28/2010 14:27:01 | 24.929 | 6/5/2010 17:29:00 | 24.5 | 4/29/2010 12:36:01 | 26.617 |
| 4/28/2010 14:47:01 | 24.992 | 6/5/2010 18:04:00 | 24.5 | 4/29/2010 12:56:01 | 26.617 |
| 4/28/2010 15:07:01 | 25.054 | 6/5/2010 18:39:00 | 24.5 | 4/29/2010 13:16:01 | 26.617 |
| 4/28/2010 15:27:01 | 25.054 | 6/5/2010 19:14:00 | 24.5 | 4/29/2010 13:36:01 | 26.617 |
| 4/28/2010 15:47:01 | 25.117 | 6/5/2010 19:49:00 | 24.5 | 4/29/2010 13:56:01 | 26.617 |
| 4/28/2010 16:07:01 | 25.179 | 6/5/2010 20:24:00 | 24.5 | 4/29/2010 14:16:01 | 26.554 |
| 4/28/2010 16:27:01 | 25.179 | 6/5/2010 20:59:00 | 24.5 | 4/29/2010 14:36:01 | 26.554 |
| 4/28/2010 16:47:01 | 25.242 | 6/5/2010 21:34:00 | 24.5 | 4/29/2010 14:56:01 | 26.554 |
| 4/28/2010 17:07:01 | 25.304 | 6/5/2010 22:09:00 | 24.5 | 4/29/2010 15:16:01 | 26.554 |
| 4/28/2010 17:27:01 | 25.304 | 6/5/2010 22:44:00 | 24.5 | 4/29/2010 15:36:01 | 26.554 |
| 4/28/2010 17:47:01 | 25.367 | 6/5/2010 23:19:00 | 24.5 | 4/29/2010 15:56:01 | 26.554 |
| 4/28/2010 18:07:01 | 25.367 | 6/5/2010 23:54:00 | 24.5 | 4/29/2010 16:16:01 | 26.554 |
| 4/28/2010 18:27:01 | 25.429 | 6/6/2010 00:29:00 | 24.5 | 4/29/2010 16:36:01 | 26.617 |
| 4/28/2010 18:47:01 | 25.429 | 6/6/2010 01:04:00 | 24.5 | 4/29/2010 16:56:01 | 26.617 |
| 4/28/2010 19:07:01 | 25.492 | 6/6/2010 01:39:00 | 24.5 | 4/29/2010 17:16:01 | 26.617 |
| 4/28/2010 19:27:01 | 25.492 | 6/6/2010 02:14:00 | 24.5 | 4/29/2010 17:36:01 | 26.617 |
| 4/28/2010 19:47:01 | 25.492 | 6/6/2010 02:49:00 | 24.5 | 4/29/2010 17:56:01 | 26.617 |
| 4/28/2010 20:07:01 | 25.492 | 6/6/2010 03:24:00 | 24.5 | 4/29/2010 18:16:01 | 26.617 |
| 4/28/2010 20:27:01 | 25.554 | 6/6/2010 03:59:00 | 24.5 | 4/29/2010 18:36:01 | 26.617 |
| 4/28/2010 20:47:01 | 25.554 | 6/6/2010 04:34:00 | 24.5 | 4/29/2010 18:56:01 | 26.617 |

|                    |        |                   |      |                    |        |
|--------------------|--------|-------------------|------|--------------------|--------|
| 4/28/2010 21:07:01 | 25.554 | 6/6/2010 05:09:00 | 24.5 | 4/29/2010 19:16:01 | 26.679 |
| 4/28/2010 21:27:01 | 25.554 | 6/6/2010 05:44:00 | 24.5 | 4/29/2010 19:36:01 | 26.679 |
| 4/28/2010 21:47:01 | 25.554 | 6/6/2010 06:19:00 | 24.5 | 4/29/2010 19:56:01 | 26.679 |
| 4/28/2010 22:07:01 | 25.554 | 6/6/2010 06:54:00 | 24.5 | 4/29/2010 20:16:01 | 26.679 |
| 4/28/2010 22:27:01 | 25.554 | 6/6/2010 07:29:00 | 24.5 | 4/29/2010 20:36:01 | 26.679 |
| 4/28/2010 22:47:01 | 25.554 | 6/6/2010 08:04:00 | 24.5 | 4/29/2010 20:56:01 | 26.742 |
| 4/28/2010 23:07:01 | 25.554 | 6/6/2010 08:39:00 | 24.5 | 4/29/2010 21:16:01 | 26.742 |
| 4/28/2010 23:27:01 | 25.554 | 6/6/2010 09:14:00 | 24.5 | 4/29/2010 21:36:01 | 26.742 |
| 4/28/2010 23:47:01 | 25.554 | 6/6/2010 09:49:00 | 24.5 | 4/29/2010 21:56:01 | 26.742 |
| 4/29/2010 00:07:01 | 25.492 | 6/6/2010 10:24:00 | 24.0 | 4/29/2010 22:16:01 | 26.742 |
| 4/29/2010 00:27:01 | 25.492 | 6/6/2010 10:59:00 | 24.5 | 4/29/2010 22:36:01 | 26.742 |
| 4/29/2010 00:47:01 | 25.492 | 6/6/2010 11:34:00 | 24.0 | 4/29/2010 22:56:01 | 26.742 |
| 4/29/2010 01:07:01 | 25.492 | 6/6/2010 12:09:00 | 24.5 | 4/29/2010 23:16:01 | 26.804 |
| 4/29/2010 01:27:01 | 25.429 | 6/6/2010 12:44:00 | 24.5 | 4/29/2010 23:36:01 | 26.804 |
| 4/29/2010 01:47:01 | 25.429 | 6/6/2010 13:19:00 | 24.5 | 4/29/2010 23:56:01 | 26.804 |
| 4/29/2010 02:07:01 | 25.429 | 6/6/2010 13:54:00 | 24.5 | 4/30/2010 00:16:01 | 26.804 |
| 4/29/2010 02:27:01 | 25.367 | 6/6/2010 14:29:00 | 24.5 | 4/30/2010 00:36:01 | 26.804 |
| 4/29/2010 02:47:01 | 25.367 | 6/6/2010 15:04:00 | 24.5 | 4/30/2010 00:56:01 | 26.804 |
| 4/29/2010 03:07:01 | 25.367 | 6/6/2010 15:39:00 | 24.5 | 4/30/2010 01:16:01 | 26.804 |
| 4/29/2010 03:27:01 | 25.367 | 6/6/2010 16:14:00 | 24.5 | 4/30/2010 01:36:01 | 26.804 |
| 4/29/2010 03:47:01 | 25.304 | 6/6/2010 16:49:00 | 25.0 | 4/30/2010 01:56:01 | 26.804 |
| 4/29/2010 04:07:01 | 25.304 | 6/6/2010 17:24:00 | 25.0 | 4/30/2010 02:16:01 | 26.742 |
| 4/29/2010 04:27:01 | 25.242 | 6/6/2010 17:59:00 | 25.0 | 4/30/2010 02:36:01 | 26.742 |
| 4/29/2010 04:47:01 | 25.242 | 6/6/2010 18:34:00 | 25.0 | 4/30/2010 02:56:01 | 26.742 |
| 4/29/2010 05:07:01 | 25.242 | 6/6/2010 19:09:00 | 25.0 | 4/30/2010 03:16:01 | 26.742 |
| 4/29/2010 05:27:01 | 25.179 | 6/6/2010 19:44:00 | 25.0 | 4/30/2010 03:36:01 | 26.742 |
| 4/29/2010 05:47:01 | 25.179 | 6/6/2010 20:19:00 | 25.0 | 4/30/2010 03:56:01 | 26.742 |
| 4/29/2010 06:07:01 | 25.117 | 6/6/2010 20:54:00 | 25.0 | 4/30/2010 04:16:01 | 26.742 |
| 4/29/2010 06:27:01 | 25.117 | 6/6/2010 21:29:00 | 25.0 | 4/30/2010 04:36:01 | 26.742 |
| 4/29/2010 06:47:01 | 25.054 | 6/6/2010 22:04:00 | 25.0 | 4/30/2010 04:56:01 | 26.742 |
| 4/29/2010 07:07:01 | 25.054 | 6/6/2010 22:39:00 | 25.0 | 4/30/2010 05:16:01 | 26.679 |
| 4/29/2010 07:27:01 | 24.992 | 6/6/2010 23:14:00 | 25.0 | 4/30/2010 05:36:01 | 26.679 |
| 4/29/2010 07:47:01 | 24.992 | 6/6/2010 23:49:00 | 25.0 | 4/30/2010 05:56:01 | 26.679 |
| 4/29/2010 08:07:01 | 24.929 | 6/7/2010 00:24:00 | 24.5 | 4/30/2010 06:16:01 | 26.679 |
| 4/29/2010 08:27:01 | 24.929 | 6/7/2010 00:59:00 | 24.5 | 4/30/2010 06:36:01 | 26.617 |
| 4/29/2010 08:47:01 | 24.867 | 6/7/2010 01:34:00 | 24.5 | 4/30/2010 06:56:01 | 26.617 |
| 4/29/2010 09:07:01 | 24.867 | 6/7/2010 02:09:00 | 24.5 | 4/30/2010 07:16:01 | 26.617 |
| 4/29/2010 09:27:01 | 24.867 | 6/7/2010 02:44:00 | 24.5 | 4/30/2010 07:36:01 | 26.617 |
| 4/29/2010 09:47:01 | 24.804 | 6/7/2010 03:19:00 | 24.5 | 4/30/2010 07:56:01 | 26.554 |
| 4/29/2010 10:07:01 | 24.804 | 6/7/2010 03:54:00 | 24.5 | 4/30/2010 08:16:01 | 26.554 |
| 4/29/2010 10:27:01 | 24.804 | 6/7/2010 04:29:00 | 24.5 | 4/30/2010 08:36:01 | 26.554 |
| 4/29/2010 10:47:01 | 24.742 | 6/7/2010 05:04:00 | 24.5 | 4/30/2010 08:56:01 | 26.554 |
| 4/29/2010 11:07:01 | 24.742 | 6/7/2010 05:39:00 | 24.5 | 4/30/2010 09:16:01 | 26.492 |
| 4/29/2010 11:27:01 | 24.742 | 6/7/2010 06:14:00 | 24.5 | 4/30/2010 09:36:01 | 26.492 |
| 4/29/2010 11:47:01 | 24.742 | 6/7/2010 06:49:00 | 24.5 | 4/30/2010 09:56:01 | 26.492 |
| 4/29/2010 12:07:01 | 24.742 | 6/7/2010 07:24:00 | 24.5 | 4/30/2010 10:16:01 | 26.492 |
| 4/29/2010 12:27:01 | 24.742 | 6/7/2010 07:59:00 | 24.5 | 4/30/2010 10:36:01 | 26.429 |
| 4/29/2010 12:47:01 | 24.742 | 6/7/2010 08:34:00 | 24.5 | 4/30/2010 10:56:01 | 26.429 |
| 4/29/2010 13:07:01 | 24.742 | 6/7/2010 09:09:00 | 24.5 | 4/30/2010 11:16:01 | 26.429 |
| 4/29/2010 13:27:01 | 24.742 | 6/7/2010 09:44:00 | 24.5 | 4/30/2010 11:36:01 | 26.429 |

|                    |        |                   |      |                    |        |
|--------------------|--------|-------------------|------|--------------------|--------|
| 4/29/2010 13:47:01 | 24.804 | 6/7/2010 10:19:00 | 24.5 | 4/30/2010 11:56:01 | 26.367 |
| 4/29/2010 14:07:01 | 24.804 | 6/7/2010 10:54:00 | 24.5 | 4/30/2010 12:16:01 | 26.367 |
| 4/29/2010 14:27:01 | 24.804 | 6/7/2010 11:29:00 | 24.5 | 4/30/2010 12:36:01 | 26.367 |
| 4/29/2010 14:47:01 | 24.867 | 6/7/2010 12:04:00 | 24.5 | 4/30/2010 12:56:01 | 26.367 |
| 4/29/2010 15:07:01 | 24.867 | 6/7/2010 12:39:00 | 24.5 | 4/30/2010 13:16:01 | 26.367 |
| 4/29/2010 15:27:01 | 24.929 | 6/7/2010 13:14:00 | 24.5 | 4/30/2010 13:36:01 | 26.304 |
| 4/29/2010 15:47:01 | 24.929 | 6/7/2010 13:49:00 | 24.5 | 4/30/2010 13:56:01 | 26.304 |
| 4/29/2010 16:07:01 | 24.992 | 6/7/2010 14:24:00 | 24.5 | 4/30/2010 14:16:01 | 26.304 |
| 4/29/2010 16:27:01 | 24.992 | 6/7/2010 14:59:00 | 24.5 | 4/30/2010 14:36:01 | 26.304 |
| 4/29/2010 16:47:01 | 24.992 | 6/7/2010 15:34:00 | 24.5 | 4/30/2010 14:56:01 | 26.304 |
| 4/29/2010 17:07:01 | 25.054 | 6/7/2010 16:09:00 | 24.5 | 4/30/2010 15:16:01 | 26.304 |
| 4/29/2010 17:27:01 | 25.054 | 6/7/2010 16:44:00 | 24.5 | 4/30/2010 15:36:01 | 26.304 |
| 4/29/2010 17:47:01 | 25.117 | 6/7/2010 17:19:00 | 24.5 | 4/30/2010 15:56:01 | 26.304 |
| 4/29/2010 18:07:01 | 25.117 | 6/7/2010 17:54:00 | 24.5 | 4/30/2010 16:16:01 | 26.367 |
| 4/29/2010 18:27:01 | 25.179 | 6/7/2010 18:29:00 | 25.0 | 4/30/2010 16:36:01 | 26.367 |
| 4/29/2010 18:47:01 | 25.179 | 6/7/2010 19:04:00 | 25.0 | 4/30/2010 16:56:01 | 26.367 |
| 4/29/2010 19:07:01 | 25.179 | 6/7/2010 19:39:00 | 25.0 | 4/30/2010 17:16:01 | 26.367 |
| 4/29/2010 19:27:01 | 25.179 | 6/7/2010 20:14:00 | 25.0 | 4/30/2010 17:36:01 | 26.367 |
| 4/29/2010 19:47:01 | 25.179 | 6/7/2010 20:49:00 | 25.0 | 4/30/2010 17:56:01 | 26.367 |
| 4/29/2010 20:07:01 | 25.179 | 6/7/2010 21:24:00 | 25.0 | 4/30/2010 18:16:01 | 26.429 |
| 4/29/2010 20:27:01 | 25.179 | 6/7/2010 21:59:00 | 25.0 | 4/30/2010 18:36:01 | 26.429 |
| 4/29/2010 20:47:01 | 25.179 | 6/7/2010 22:34:00 | 25.0 | 4/30/2010 18:56:01 | 26.429 |
| 4/29/2010 21:07:01 | 25.179 | 6/7/2010 23:09:00 | 25.0 | 4/30/2010 19:16:01 | 26.429 |
| 4/29/2010 21:27:01 | 25.179 | 6/7/2010 23:44:00 | 25.0 | 4/30/2010 19:36:01 | 26.429 |
| 4/29/2010 21:47:01 | 25.179 | 6/8/2010 00:19:00 | 25.0 | 4/30/2010 19:56:01 | 26.492 |
| 4/29/2010 22:07:01 | 25.179 | 6/8/2010 00:54:00 | 25.0 | 4/30/2010 20:16:01 | 26.492 |
| 4/29/2010 22:27:01 | 25.179 | 6/8/2010 01:29:00 | 25.0 | 4/30/2010 20:36:01 | 26.492 |
| 4/29/2010 22:47:01 | 25.179 | 6/8/2010 02:04:00 | 25.0 | 4/30/2010 20:56:01 | 26.554 |
| 4/29/2010 23:07:01 | 25.117 | 6/8/2010 02:39:00 | 25.0 | 4/30/2010 21:16:01 | 26.554 |
| 4/29/2010 23:27:01 | 25.117 | 6/8/2010 03:14:00 | 25.0 | 4/30/2010 21:36:01 | 26.554 |
| 4/29/2010 23:47:01 | 25.117 | 6/8/2010 03:49:00 | 25.0 | 4/30/2010 21:56:01 | 26.554 |
| 4/30/2010 00:07:01 | 25.117 | 6/8/2010 04:24:00 | 25.0 | 4/30/2010 22:16:01 | 26.554 |
| 4/30/2010 00:27:01 | 25.054 | 6/8/2010 04:59:00 | 24.5 | 4/30/2010 22:36:01 | 26.554 |
| 4/30/2010 00:47:01 | 25.054 | 6/8/2010 05:34:00 | 24.5 | 4/30/2010 22:56:01 | 26.617 |
| 4/30/2010 01:07:01 | 25.054 | 6/8/2010 06:09:00 | 24.5 | 4/30/2010 23:16:01 | 26.617 |
| 4/30/2010 01:27:01 | 24.992 | 6/8/2010 06:44:00 | 24.5 | 4/30/2010 23:36:01 | 26.617 |
| 4/30/2010 01:47:01 | 24.992 | 6/8/2010 07:19:00 | 24.5 | 4/30/2010 23:56:01 | 26.617 |
| 4/30/2010 02:07:01 | 24.992 | 6/8/2010 07:54:00 | 24.5 | 5/1/2010 00:16:01  | 26.617 |
| 4/30/2010 02:27:01 | 24.929 | 6/8/2010 08:29:00 | 24.5 | 5/1/2010 00:36:01  | 26.617 |
| 4/30/2010 02:47:01 | 24.929 | 6/8/2010 09:04:00 | 24.5 | 5/1/2010 00:56:01  | 26.617 |
| 4/30/2010 03:07:01 | 24.929 | 6/8/2010 09:39:00 | 24.5 | 5/1/2010 01:16:01  | 26.617 |
| 4/30/2010 03:27:01 | 24.867 | 6/8/2010 10:14:00 | 24.5 | 5/1/2010 01:36:01  | 26.617 |
| 4/30/2010 03:47:01 | 24.867 | 6/8/2010 10:49:00 | 24.5 | 5/1/2010 01:56:01  | 26.617 |
| 4/30/2010 04:07:01 | 24.804 | 6/8/2010 11:24:00 | 24.5 | 5/1/2010 02:16:01  | 26.617 |
| 4/30/2010 04:27:01 | 24.804 | 6/8/2010 11:59:00 | 24.5 | 5/1/2010 02:36:01  | 26.617 |
| 4/30/2010 04:47:01 | 24.742 | 6/8/2010 12:34:00 | 24.5 | 5/1/2010 02:56:01  | 26.617 |
| 4/30/2010 05:07:01 | 24.742 | 6/8/2010 13:09:00 | 24.5 | 5/1/2010 03:16:01  | 26.617 |
| 4/30/2010 05:27:01 | 24.742 | 6/8/2010 13:44:00 | 24.5 | 5/1/2010 03:36:01  | 26.617 |
| 4/30/2010 05:47:01 | 24.679 | 6/8/2010 14:19:00 | 24.5 | 5/1/2010 03:56:01  | 26.617 |
| 4/30/2010 06:07:01 | 24.679 | 6/8/2010 14:54:00 | 24.5 | 5/1/2010 04:16:01  | 26.617 |



|                    |                          |                        |        |
|--------------------|--------------------------|------------------------|--------|
| 4/30/2010 06:27:01 | 24.617 6/8/2010 15:29:00 | 24.5 5/1/2010 04:36:01 | 26.617 |
| 4/30/2010 06:47:01 | 24.617 6/8/2010 16:04:00 | 24.5 5/1/2010 04:56:01 | 26.617 |
| 4/30/2010 07:07:01 | 24.617 6/8/2010 16:39:00 | 24.5 5/1/2010 05:16:01 | 26.617 |
| 4/30/2010 07:27:01 | 24.554 6/8/2010 17:14:00 | 25.0 5/1/2010 05:36:01 | 26.617 |
| 4/30/2010 07:47:01 | 24.554 6/8/2010 17:49:00 | 25.0 5/1/2010 05:56:01 | 26.554 |
| 4/30/2010 08:07:01 | 24.492 6/8/2010 18:24:00 | 25.0 5/1/2010 06:16:01 | 26.554 |
| 4/30/2010 08:27:01 | 24.492 6/8/2010 18:59:00 | 25.0 5/1/2010 06:36:01 | 26.554 |
| 4/30/2010 08:47:01 | 24.429 6/8/2010 19:34:00 | 25.0 5/1/2010 06:56:01 | 26.554 |
| 4/30/2010 09:07:01 | 24.429 6/8/2010 20:09:00 | 25.0 5/1/2010 07:16:01 | 26.554 |
| 4/30/2010 09:27:01 | 24.429 6/8/2010 20:44:00 | 25.0 5/1/2010 07:36:01 | 26.554 |
| 4/30/2010 09:47:01 | 24.367 6/8/2010 21:19:00 | 25.0 5/1/2010 07:56:01 | 26.554 |
| 4/30/2010 10:07:01 | 24.367 6/8/2010 21:54:00 | 25.0 5/1/2010 08:16:01 | 26.492 |
| 4/30/2010 10:27:01 | 24.367 6/8/2010 22:29:00 | 25.0 5/1/2010 08:36:01 | 26.492 |
| 4/30/2010 10:47:01 | 24.304 6/8/2010 23:04:00 | 25.0 5/1/2010 08:56:01 | 26.492 |
| 4/30/2010 11:07:01 | 24.304 6/8/2010 23:39:00 | 25.0 5/1/2010 09:16:01 | 26.492 |
| 4/30/2010 11:27:01 | 24.304 6/9/2010 00:14:00 | 25.0 5/1/2010 09:36:01 | 26.492 |
| 4/30/2010 11:47:01 | 24.304 6/9/2010 00:49:00 | 24.5 5/1/2010 09:56:01 | 26.429 |
| 4/30/2010 12:07:01 | 24.304 6/9/2010 01:24:00 | 24.5 5/1/2010 10:16:01 | 26.429 |
| 4/30/2010 12:27:01 | 24.304 6/9/2010 01:59:00 | 24.5 5/1/2010 10:36:01 | 26.429 |
| 4/30/2010 12:47:01 | 24.367 6/9/2010 02:34:00 | 24.5 5/1/2010 10:56:01 | 26.429 |
| 4/30/2010 13:07:01 | 24.367 6/9/2010 03:09:00 | 24.5 5/1/2010 11:16:01 | 26.429 |
| 4/30/2010 13:27:01 | 24.367 6/9/2010 03:44:00 | 24.5 5/1/2010 11:36:01 | 26.429 |
| 4/30/2010 13:47:01 | 24.429 6/9/2010 04:19:00 | 24.5 5/1/2010 11:56:01 | 26.367 |
| 4/30/2010 14:07:01 | 24.429 6/9/2010 04:54:00 | 24.5 5/1/2010 12:16:01 | 26.367 |
| 4/30/2010 14:27:01 | 24.492 6/9/2010 05:29:00 | 24.5 5/1/2010 12:36:01 | 26.367 |
| 4/30/2010 14:47:01 | 24.492 6/9/2010 06:04:00 | 24.5 5/1/2010 12:56:01 | 26.367 |
| 4/30/2010 15:07:01 | 24.554 6/9/2010 06:39:00 | 24.5 5/1/2010 13:16:01 | 26.367 |
| 4/30/2010 15:27:01 | 24.554 6/9/2010 07:14:00 | 24.5 5/1/2010 13:36:01 | 26.367 |
| 4/30/2010 15:47:01 | 24.617 6/9/2010 07:49:00 | 24.5 5/1/2010 13:56:01 | 26.367 |
| 4/30/2010 16:07:01 | 24.679 6/9/2010 08:24:00 | 24.5 5/1/2010 14:16:01 | 26.367 |
| 4/30/2010 16:27:01 | 24.679 6/9/2010 08:59:00 | 24.0 5/1/2010 14:36:01 | 26.367 |
| 4/30/2010 16:47:01 | 24.742 6/9/2010 09:34:00 | 24.0 5/1/2010 14:56:01 | 26.367 |
| 4/30/2010 17:07:01 | 24.804 6/9/2010 10:09:00 | 24.0 5/1/2010 15:16:01 | 26.367 |
| 4/30/2010 17:27:01 | 24.804 6/9/2010 10:44:00 | 24.0 5/1/2010 15:36:01 | 26.367 |
| 4/30/2010 17:47:01 | 24.867 6/9/2010 11:19:00 | 24.0 5/1/2010 15:56:01 | 26.429 |
| 4/30/2010 18:07:01 | 24.867 6/9/2010 11:54:00 | 24.0 5/1/2010 16:16:01 | 26.429 |
| 4/30/2010 18:27:01 | 24.929 6/9/2010 12:29:00 | 24.0 5/1/2010 16:36:01 | 26.429 |
| 4/30/2010 18:47:01 | 24.929 6/9/2010 13:04:00 | 24.0 5/1/2010 16:56:01 | 26.429 |
| 4/30/2010 19:07:01 | 24.929 6/9/2010 13:39:00 | 24.0 5/1/2010 17:16:01 | 26.429 |
| 4/30/2010 19:27:01 | 24.992 6/9/2010 14:14:00 | 24.0 5/1/2010 17:36:01 | 26.492 |
| 4/30/2010 19:47:01 | 24.992 6/9/2010 14:49:00 | 24.5 5/1/2010 17:56:01 | 26.492 |
| 4/30/2010 20:07:01 | 24.992 6/9/2010 15:24:00 | 24.5 5/1/2010 18:16:01 | 26.492 |
| 4/30/2010 20:27:01 | 24.992 6/9/2010 15:59:00 | 24.5 5/1/2010 18:36:01 | 26.492 |
| 4/30/2010 20:47:01 | 24.992 6/9/2010 16:34:00 | 24.5 5/1/2010 18:56:01 | 26.492 |
| 4/30/2010 21:07:01 | 24.992 6/9/2010 17:09:00 | 24.5 5/1/2010 19:16:01 | 26.554 |
| 4/30/2010 21:27:01 | 24.992 6/9/2010 17:44:00 | 24.5 5/1/2010 19:36:01 | 26.554 |
| 4/30/2010 21:47:01 | 24.992 6/9/2010 18:19:00 | 24.5 5/1/2010 19:56:01 | 26.554 |
| 4/30/2010 22:07:01 | 24.992 6/9/2010 18:54:00 | 24.5 5/1/2010 20:16:01 | 26.617 |
| 4/30/2010 22:27:01 | 24.992 6/9/2010 19:29:00 | 24.5 5/1/2010 20:36:01 | 26.617 |
| 4/30/2010 22:47:01 | 24.992 6/9/2010 20:04:00 | 24.5 5/1/2010 20:56:01 | 26.617 |

|                    |                           |                        |        |
|--------------------|---------------------------|------------------------|--------|
| 4/30/2010 23:07:01 | 24.929 6/9/2010 20:39:00  | 24.5 5/1/2010 21:16:01 | 26.617 |
| 4/30/2010 23:27:01 | 24.929 6/9/2010 21:14:00  | 24.5 5/1/2010 21:36:01 | 26.679 |
| 4/30/2010 23:47:01 | 24.929 6/9/2010 21:49:00  | 24.5 5/1/2010 21:56:01 | 26.679 |
| 5/1/2010 00:07:01  | 24.929 6/9/2010 22:24:00  | 24.5 5/1/2010 22:16:01 | 26.679 |
| 5/1/2010 00:27:01  | 24.929 6/9/2010 22:59:00  | 24.5 5/1/2010 22:36:01 | 26.679 |
| 5/1/2010 00:47:01  | 24.867 6/9/2010 23:34:00  | 24.5 5/1/2010 22:56:01 | 26.679 |
| 5/1/2010 01:07:01  | 24.867 6/10/2010 00:09:00 | 24.5 5/1/2010 23:16:01 | 26.679 |
| 5/1/2010 01:27:01  | 24.867 6/10/2010 00:44:00 | 24.5 5/1/2010 23:36:01 | 26.679 |
| 5/1/2010 01:47:01  | 24.867 6/10/2010 01:19:00 | 24.5 5/1/2010 23:56:01 | 26.742 |
| 5/1/2010 02:07:01  | 24.804 6/10/2010 01:54:00 | 24.5 5/2/2010 00:16:01 | 26.742 |
| 5/1/2010 02:27:01  | 24.804 6/10/2010 02:29:00 | 24.5 5/2/2010 00:36:01 | 26.742 |
| 5/1/2010 02:47:01  | 24.804 6/10/2010 03:04:00 | 24.5 5/2/2010 00:56:01 | 26.742 |
| 5/1/2010 03:07:01  | 24.804 6/10/2010 03:39:00 | 24.5 5/2/2010 01:16:01 | 26.742 |
| 5/1/2010 03:27:01  | 24.742 6/10/2010 04:14:00 | 24.5 5/2/2010 01:36:01 | 26.742 |
| 5/1/2010 03:47:01  | 24.742 6/10/2010 04:49:00 | 24.5 5/2/2010 01:56:01 | 26.742 |
| 5/1/2010 04:07:01  | 24.742 6/10/2010 05:24:00 | 24.0 5/2/2010 02:16:01 | 26.742 |
| 5/1/2010 04:27:01  | 24.742 6/10/2010 05:59:00 | 24.0 5/2/2010 02:36:01 | 26.742 |
| 5/1/2010 04:47:01  | 24.679 6/10/2010 06:34:00 | 24.0 5/2/2010 02:56:01 | 26.742 |
| 5/1/2010 05:07:01  | 24.679 6/10/2010 07:09:00 | 24.0 5/2/2010 03:16:01 | 26.742 |
| 5/1/2010 05:27:01  | 24.679 6/10/2010 07:44:00 | 24.0 5/2/2010 03:36:01 | 26.742 |
| 5/1/2010 05:47:01  | 24.679 6/10/2010 08:19:00 | 24.0 5/2/2010 03:56:01 | 26.742 |
| 5/1/2010 06:07:01  | 24.617 6/10/2010 08:54:00 | 24.0 5/2/2010 04:16:01 | 26.742 |
| 5/1/2010 06:27:01  | 24.617 6/10/2010 09:29:00 | 24.0 5/2/2010 04:36:01 | 26.742 |
| 5/1/2010 06:47:01  | 24.617 6/10/2010 10:04:00 | 24.0 5/2/2010 04:56:01 | 26.742 |
| 5/1/2010 07:07:01  | 24.617 6/10/2010 10:39:00 | 24.0 5/2/2010 05:16:01 | 26.679 |
| 5/1/2010 07:27:01  | 24.554 6/10/2010 11:14:00 | 24.0 5/2/2010 05:36:01 | 26.679 |
| 5/1/2010 07:47:01  | 24.554 6/10/2010 11:49:00 | 24.0 5/2/2010 05:56:01 | 26.679 |
| 5/1/2010 08:07:01  | 24.554 6/10/2010 12:24:00 | 24.0 5/2/2010 06:16:01 | 26.679 |
| 5/1/2010 08:27:01  | 24.554 6/10/2010 12:59:00 | 24.0 5/2/2010 06:36:01 | 26.679 |
| 5/1/2010 08:47:01  | 24.492 6/10/2010 13:34:00 | 24.0 5/2/2010 06:56:01 | 26.679 |
| 5/1/2010 09:07:01  | 24.492 6/10/2010 14:09:00 | 24.0 5/2/2010 07:16:01 | 26.679 |
| 5/1/2010 09:27:01  | 24.492 6/10/2010 14:44:00 | 24.0 5/2/2010 07:36:01 | 26.679 |
| 5/1/2010 09:47:01  | 24.492 6/10/2010 15:19:00 | 24.0 5/2/2010 07:56:01 | 26.679 |
| 5/1/2010 10:07:01  | 24.492 6/10/2010 15:54:00 | 24.0 5/2/2010 08:16:01 | 26.617 |
| 5/1/2010 10:27:01  | 24.492 6/10/2010 16:29:00 | 24.0 5/2/2010 08:36:01 | 26.617 |
| 5/1/2010 10:47:01  | 24.492 6/10/2010 17:04:00 | 24.5 5/2/2010 08:56:01 | 26.617 |
| 5/1/2010 11:07:01  | 24.429 6/10/2010 17:39:00 | 24.5 5/2/2010 09:16:01 | 26.617 |
| 5/1/2010 11:27:01  | 24.492 6/10/2010 18:14:00 | 24.5 5/2/2010 09:36:01 | 26.617 |
| 5/1/2010 11:47:01  | 24.492 6/10/2010 18:49:00 | 24.5 5/2/2010 09:56:01 | 26.617 |
| 5/1/2010 12:07:01  | 24.492 6/10/2010 19:24:00 | 24.5 5/2/2010 10:16:01 | 26.617 |
| 5/1/2010 12:27:01  | 24.492 6/10/2010 19:59:00 | 24.5 5/2/2010 10:36:01 | 26.554 |
| 5/1/2010 12:47:01  | 24.554 6/10/2010 20:34:00 | 24.5 5/2/2010 10:56:01 | 26.554 |
| 5/1/2010 13:07:01  | 24.554 6/10/2010 21:09:00 | 24.5 5/2/2010 11:16:01 | 26.554 |
| 5/1/2010 13:27:01  | 24.554 6/10/2010 21:44:00 | 24.5 5/2/2010 11:36:01 | 26.554 |
| 5/1/2010 13:47:01  | 24.617 6/10/2010 22:19:00 | 24.5 5/2/2010 11:56:01 | 26.554 |
| 5/1/2010 14:07:01  | 24.617 6/10/2010 22:54:00 | 24.5 5/2/2010 12:16:01 | 26.554 |
| 5/1/2010 14:27:01  | 24.679 6/10/2010 23:29:00 | 24.5 5/2/2010 12:36:01 | 26.554 |
| 5/1/2010 14:47:01  | 24.742 6/11/2010 00:04:00 | 24.5 5/2/2010 12:56:01 | 26.554 |
| 5/1/2010 15:07:01  | 24.742 6/11/2010 00:39:00 | 24.5 5/2/2010 13:16:01 | 26.554 |
| 5/1/2010 15:27:01  | 24.804 6/11/2010 01:14:00 | 24.5 5/2/2010 13:36:01 | 26.554 |

|                   |        |                    |      |                   |        |
|-------------------|--------|--------------------|------|-------------------|--------|
| 5/1/2010 15:47:01 | 24.804 | 6/11/2010 01:49:00 | 24.5 | 5/2/2010 13:56:01 | 26.554 |
| 5/1/2010 16:07:01 | 24.867 | 6/11/2010 02:24:00 | 24.5 | 5/2/2010 14:16:01 | 26.554 |
| 5/1/2010 16:27:01 | 24.929 | 6/11/2010 02:59:00 | 24.5 | 5/2/2010 14:36:01 | 26.554 |
| 5/1/2010 16:47:01 | 24.929 | 6/11/2010 03:34:00 | 24.5 | 5/2/2010 14:56:01 | 26.554 |
| 5/1/2010 17:07:01 | 24.992 | 6/11/2010 04:09:00 | 24.5 | 5/2/2010 15:16:01 | 26.554 |
| 5/1/2010 17:27:01 | 25.054 | 6/11/2010 04:44:00 | 24.5 | 5/2/2010 15:36:01 | 26.554 |
| 5/1/2010 17:47:01 | 25.054 | 6/11/2010 05:19:00 | 24.5 | 5/2/2010 15:56:01 | 26.554 |
| 5/1/2010 18:07:01 | 25.054 | 6/11/2010 05:54:00 | 24.0 | 5/2/2010 16:16:01 | 26.554 |
| 5/1/2010 18:27:01 | 25.117 | 6/11/2010 06:29:00 | 24.0 | 5/2/2010 16:36:01 | 26.554 |
| 5/1/2010 18:47:01 | 25.117 | 6/11/2010 07:04:00 | 24.0 | 5/2/2010 16:56:01 | 26.554 |
| 5/1/2010 19:07:01 | 25.117 | 6/11/2010 07:39:00 | 24.0 | 5/2/2010 17:16:01 | 26.554 |
| 5/1/2010 19:27:01 | 25.179 | 6/11/2010 08:14:00 | 24.0 | 5/2/2010 17:36:01 | 26.617 |
| 5/1/2010 19:47:01 | 25.179 | 6/11/2010 08:49:00 | 24.0 | 5/2/2010 17:56:01 | 26.617 |
| 5/1/2010 20:07:01 | 25.179 | 6/11/2010 09:24:00 | 24.0 | 5/2/2010 18:16:01 | 26.617 |
| 5/1/2010 20:27:01 | 25.179 | 6/11/2010 09:59:00 | 24.0 | 5/2/2010 18:36:01 | 26.617 |
| 5/1/2010 20:47:01 | 25.179 | 6/11/2010 10:34:00 | 24.0 | 5/2/2010 18:56:01 | 26.617 |
| 5/1/2010 21:07:01 | 25.179 | 6/11/2010 11:09:00 | 24.0 | 5/2/2010 19:16:01 | 26.617 |
| 5/1/2010 21:27:01 | 25.179 | 6/11/2010 11:44:00 | 24.0 | 5/2/2010 19:36:01 | 26.679 |
| 5/1/2010 21:47:01 | 25.179 | 6/11/2010 12:19:00 | 24.0 | 5/2/2010 19:56:01 | 26.679 |
| 5/1/2010 22:07:01 | 25.179 | 6/11/2010 12:54:00 | 24.0 | 5/2/2010 20:16:01 | 26.679 |
| 5/1/2010 22:27:01 | 25.179 | 6/11/2010 13:29:00 | 24.0 | 5/2/2010 20:36:01 | 26.679 |
| 5/1/2010 22:47:01 | 25.179 | 6/11/2010 14:04:00 | 24.0 | 5/2/2010 20:56:01 | 26.742 |
| 5/1/2010 23:07:01 | 25.179 | 6/11/2010 14:39:00 | 24.0 | 5/2/2010 21:16:01 | 26.742 |
| 5/1/2010 23:27:01 | 25.179 | 6/11/2010 15:14:00 | 24.0 | 5/2/2010 21:36:01 | 26.742 |
| 5/1/2010 23:47:01 | 25.179 | 6/11/2010 15:49:00 | 24.0 | 5/2/2010 21:56:01 | 26.742 |
| 5/2/2010 00:07:01 | 25.179 | 6/11/2010 16:24:00 | 24.0 | 5/2/2010 22:16:01 | 26.742 |
| 5/2/2010 00:27:01 | 25.179 | 6/11/2010 16:59:00 | 24.5 | 5/2/2010 22:36:01 | 26.742 |
| 5/2/2010 00:47:01 | 25.179 | 6/11/2010 17:34:00 | 24.5 | 5/2/2010 22:56:01 | 26.804 |
| 5/2/2010 01:07:01 | 25.117 | 6/11/2010 18:09:00 | 24.5 | 5/2/2010 23:16:01 | 26.804 |
| 5/2/2010 01:27:01 | 25.117 | 6/11/2010 18:44:00 | 24.5 | 5/2/2010 23:36:01 | 26.804 |
| 5/2/2010 01:47:01 | 25.117 | 6/11/2010 19:19:00 | 24.5 | 5/2/2010 23:56:01 | 26.804 |
| 5/2/2010 02:07:01 | 25.117 | 6/11/2010 19:54:00 | 24.5 | 5/3/2010 00:16:01 | 26.804 |
| 5/2/2010 02:27:01 | 25.117 | 6/11/2010 20:29:00 | 24.5 | 5/3/2010 00:36:01 | 26.804 |
| 5/2/2010 02:47:01 | 25.117 | 6/11/2010 21:04:00 | 24.5 | 5/3/2010 00:56:01 | 26.804 |
| 5/2/2010 03:07:01 | 25.117 | 6/11/2010 21:39:00 | 24.5 | 5/3/2010 01:16:01 | 26.804 |
| 5/2/2010 03:27:01 | 25.117 | 6/11/2010 22:14:00 | 24.5 | 5/3/2010 01:36:01 | 26.804 |
| 5/2/2010 03:47:01 | 25.054 | 6/11/2010 22:49:00 | 24.5 | 5/3/2010 01:56:01 | 26.804 |
| 5/2/2010 04:07:01 | 25.054 | 6/11/2010 23:24:00 | 24.5 | 5/3/2010 02:16:01 | 26.804 |
| 5/2/2010 04:27:01 | 25.054 | 6/11/2010 23:59:00 | 24.5 | 5/3/2010 02:36:01 | 26.804 |
| 5/2/2010 04:47:01 | 25.054 | 6/12/2010 00:34:00 | 24.5 | 5/3/2010 02:56:01 | 26.804 |
| 5/2/2010 05:07:01 | 25.054 | 6/12/2010 01:09:00 | 24.5 | 5/3/2010 03:16:01 | 26.804 |
| 5/2/2010 05:27:01 | 25.054 | 6/12/2010 01:44:00 | 24.5 | 5/3/2010 03:36:01 | 26.804 |
| 5/2/2010 05:47:01 | 24.992 | 6/12/2010 02:19:00 | 24.5 | 5/3/2010 03:56:01 | 26.804 |
| 5/2/2010 06:07:01 | 24.992 | 6/12/2010 02:54:00 | 24.5 | 5/3/2010 04:16:01 | 26.804 |
| 5/2/2010 06:27:01 | 24.992 | 6/12/2010 03:29:00 | 24.5 | 5/3/2010 04:36:01 | 26.804 |
| 5/2/2010 06:47:01 | 24.992 | 6/12/2010 04:04:00 | 24.5 | 5/3/2010 04:56:01 | 26.804 |
| 5/2/2010 07:07:01 | 24.992 | 6/12/2010 04:39:00 | 24.0 | 5/3/2010 05:16:01 | 26.742 |
| 5/2/2010 07:27:01 | 24.992 | 6/12/2010 05:14:00 | 24.0 | 5/3/2010 05:36:01 | 26.742 |
| 5/2/2010 07:47:01 | 24.992 | 6/12/2010 05:49:00 | 24.0 | 5/3/2010 05:56:01 | 26.742 |
| 5/2/2010 08:07:01 | 24.929 | 6/12/2010 06:24:00 | 24.0 | 5/3/2010 06:16:01 | 26.742 |

|                   |                           |                        |        |
|-------------------|---------------------------|------------------------|--------|
| 5/2/2010 08:27:01 | 24.929 6/12/2010 06:59:00 | 24.0 5/3/2010 06:36:01 | 26.742 |
| 5/2/2010 08:47:01 | 24.929 6/12/2010 07:34:00 | 24.0 5/3/2010 06:56:01 | 26.742 |
| 5/2/2010 09:07:01 | 24.929 6/12/2010 08:09:00 | 24.0 5/3/2010 07:16:01 | 26.679 |
| 5/2/2010 09:27:01 | 24.929 6/12/2010 08:44:00 | 24.0 5/3/2010 07:36:01 | 26.679 |
| 5/2/2010 09:47:01 | 24.929 6/12/2010 09:19:00 | 24.0 5/3/2010 07:56:01 | 26.679 |
| 5/2/2010 10:07:01 | 24.929 6/12/2010 09:54:00 | 24.0 5/3/2010 08:16:01 | 26.679 |
| 5/2/2010 10:27:01 | 24.929 6/12/2010 10:29:00 | 24.0 5/3/2010 08:36:01 | 26.679 |
| 5/2/2010 10:47:01 | 24.929 6/12/2010 11:04:00 | 24.0 5/3/2010 08:56:01 | 26.679 |
| 5/2/2010 11:07:01 | 24.929 6/12/2010 11:39:00 | 24.0 5/3/2010 09:16:01 | 26.679 |
| 5/2/2010 11:27:01 | 24.929 6/12/2010 12:14:00 | 24.0 5/3/2010 09:36:01 | 26.617 |
| 5/2/2010 11:47:01 | 24.929 6/12/2010 12:49:00 | 24.0 5/3/2010 09:56:01 | 26.617 |
| 5/2/2010 12:07:01 | 24.929 6/12/2010 13:24:00 | 24.0 5/3/2010 10:16:01 | 26.617 |
| 5/2/2010 12:27:01 | 24.992 6/12/2010 13:59:00 | 24.0 5/3/2010 10:36:01 | 26.617 |
| 5/2/2010 12:47:01 | 24.992 6/12/2010 14:34:00 | 24.0 5/3/2010 10:56:01 | 26.617 |
| 5/2/2010 13:07:01 | 24.992 6/12/2010 15:09:00 | 24.0 5/3/2010 11:16:01 | 26.554 |
| 5/2/2010 13:27:01 | 25.054 6/12/2010 15:44:00 | 24.0 5/3/2010 11:36:01 | 26.554 |
| 5/2/2010 13:47:01 | 25.054 6/12/2010 16:19:00 | 24.0 5/3/2010 11:56:01 | 26.554 |
| 5/2/2010 14:07:01 | 25.054 6/12/2010 16:54:00 | 24.0 5/3/2010 12:16:01 | 26.554 |
| 5/2/2010 14:27:01 | 25.117 6/12/2010 17:29:00 | 24.0 5/3/2010 12:36:01 | 26.554 |
| 5/2/2010 14:47:01 | 25.117 6/12/2010 18:04:00 | 24.5 5/3/2010 12:56:01 | 26.554 |
| 5/2/2010 15:07:01 | 25.179 6/12/2010 18:39:00 | 24.5 5/3/2010 13:16:01 | 26.554 |
| 5/2/2010 15:27:01 | 25.179 6/12/2010 19:14:00 | 24.5 5/3/2010 13:36:01 | 26.554 |
| 5/2/2010 15:47:01 | 25.242 6/12/2010 19:49:00 | 24.5 5/3/2010 13:56:01 | 26.554 |
| 5/2/2010 16:07:01 | 25.242 6/12/2010 20:24:00 | 24.5 5/3/2010 14:16:01 | 26.554 |
| 5/2/2010 16:27:01 | 25.304 6/12/2010 20:59:00 | 24.5 5/3/2010 14:36:01 | 26.492 |
| 5/2/2010 16:47:01 | 25.304 6/12/2010 21:34:00 | 24.5 5/3/2010 14:56:01 | 26.554 |
| 5/2/2010 17:07:01 | 25.367 6/12/2010 22:09:00 | 24.5 5/3/2010 15:16:01 | 26.554 |
| 5/2/2010 17:27:01 | 25.367 6/12/2010 22:44:00 | 24.5 5/3/2010 15:36:01 | 26.554 |
| 5/2/2010 17:47:01 | 25.367 6/12/2010 23:19:00 | 24.5 5/3/2010 15:56:01 | 26.554 |
| 5/2/2010 18:07:01 | 25.429 6/12/2010 23:54:00 | 24.5 5/3/2010 16:16:01 | 26.554 |
| 5/2/2010 18:27:01 | 25.429 6/13/2010 00:29:00 | 24.5 5/3/2010 16:36:01 | 26.554 |
| 5/2/2010 18:47:01 | 25.429 6/13/2010 01:04:00 | 24.5 5/3/2010 16:56:01 | 26.554 |
| 5/2/2010 19:07:01 | 25.429 6/13/2010 01:39:00 | 24.5 5/3/2010 17:16:01 | 26.554 |
| 5/2/2010 19:27:01 | 25.492 6/13/2010 02:14:00 | 24.5 5/3/2010 17:36:01 | 26.617 |
| 5/2/2010 19:47:01 | 25.492 6/13/2010 02:49:00 | 24.5 5/3/2010 17:56:01 | 26.617 |
| 5/2/2010 20:07:01 | 25.492 6/13/2010 03:24:00 | 24.5 5/3/2010 18:16:01 | 26.617 |
| 5/2/2010 20:27:01 | 25.492 6/13/2010 03:59:00 | 24.0 5/3/2010 18:36:01 | 26.617 |
| 5/2/2010 20:47:01 | 25.492 6/13/2010 04:34:00 | 24.0 5/3/2010 18:56:01 | 26.617 |
| 5/2/2010 21:07:01 | 25.492 6/13/2010 05:09:00 | 24.0 5/3/2010 19:16:01 | 26.679 |
| 5/2/2010 21:27:01 | 25.492 6/13/2010 05:44:00 | 24.0 5/3/2010 19:36:01 | 26.679 |
| 5/2/2010 21:47:01 | 25.429 6/13/2010 06:19:00 | 24.0 5/3/2010 19:56:01 | 26.679 |
| 5/2/2010 22:07:01 | 25.429 6/13/2010 06:54:00 | 24.0 5/3/2010 20:16:01 | 26.742 |
| 5/2/2010 22:27:01 | 25.429 6/13/2010 07:29:00 | 24.0 5/3/2010 20:36:01 | 26.742 |
| 5/2/2010 22:47:01 | 25.429 6/13/2010 08:04:00 | 24.0 5/3/2010 20:56:01 | 26.742 |
| 5/2/2010 23:07:01 | 25.429 6/13/2010 08:39:00 | 24.0 5/3/2010 21:16:01 | 26.742 |
| 5/2/2010 23:27:01 | 25.429 6/13/2010 09:14:00 | 24.0 5/3/2010 21:36:01 | 26.804 |
| 5/2/2010 23:47:01 | 25.367 6/13/2010 09:49:00 | 24.0 5/3/2010 21:56:01 | 26.804 |
| 5/3/2010 00:07:01 | 25.367 6/13/2010 10:24:00 | 24.0 5/3/2010 22:16:01 | 26.804 |
| 5/3/2010 00:27:01 | 25.367 6/13/2010 10:59:00 | 24.0 5/3/2010 22:36:01 | 26.804 |
| 5/3/2010 00:47:01 | 25.367 6/13/2010 11:34:00 | 24.0 5/3/2010 22:56:01 | 26.866 |

|                   |                           |                        |        |
|-------------------|---------------------------|------------------------|--------|
| 5/3/2010 01:07:01 | 25.304 6/13/2010 12:09:00 | 24.0 5/3/2010 23:16:01 | 26.866 |
| 5/3/2010 01:27:01 | 25.304 6/13/2010 12:44:00 | 24.0 5/3/2010 23:36:01 | 26.866 |
| 5/3/2010 01:47:01 | 25.304 6/13/2010 13:19:00 | 24.0 5/3/2010 23:56:01 | 26.866 |
| 5/3/2010 02:07:01 | 25.304 6/13/2010 13:54:00 | 24.0 5/4/2010 00:16:01 | 26.866 |
| 5/3/2010 02:27:01 | 25.304 6/13/2010 14:29:00 | 24.0 5/4/2010 00:36:01 | 26.866 |
| 5/3/2010 02:47:01 | 25.242 6/13/2010 15:04:00 | 24.0 5/4/2010 00:56:01 | 26.866 |
| 5/3/2010 03:07:01 | 25.242 6/13/2010 15:39:00 | 24.0 5/4/2010 01:16:01 | 26.866 |
| 5/3/2010 03:27:01 | 25.242 6/13/2010 16:14:00 | 24.0 5/4/2010 01:36:01 | 26.929 |
| 5/3/2010 03:47:01 | 25.179 6/13/2010 16:49:00 | 24.0 5/4/2010 01:56:01 | 26.866 |
| 5/3/2010 04:07:01 | 25.179 6/13/2010 17:24:00 | 24.0 5/4/2010 02:16:01 | 26.866 |
| 5/3/2010 04:27:01 | 25.179 6/13/2010 17:59:00 | 24.0 5/4/2010 02:36:01 | 26.929 |
| 5/3/2010 04:47:01 | 25.179 6/13/2010 18:34:00 | 24.0 5/4/2010 02:56:01 | 26.929 |
| 5/3/2010 05:07:01 | 25.117 6/13/2010 19:09:00 | 24.5 5/4/2010 03:16:01 | 26.929 |
| 5/3/2010 05:27:01 | 25.117 6/13/2010 19:44:00 | 24.5 5/4/2010 03:36:01 | 26.929 |
| 5/3/2010 05:47:01 | 25.117 6/13/2010 20:19:00 | 24.5 5/4/2010 03:56:01 | 26.929 |
| 5/3/2010 06:07:01 | 25.117 6/13/2010 20:54:00 | 24.5 5/4/2010 04:16:01 | 26.929 |
| 5/3/2010 06:27:01 | 25.054 6/13/2010 21:29:00 | 24.5 5/4/2010 04:36:01 | 26.929 |
| 5/3/2010 06:47:01 | 25.054 6/13/2010 22:04:00 | 24.5 5/4/2010 04:56:01 | 26.929 |
| 5/3/2010 07:07:01 | 25.054 6/13/2010 22:39:00 | 24.5 5/4/2010 05:16:01 | 26.929 |
| 5/3/2010 07:27:01 | 25.054 6/13/2010 23:14:00 | 24.5 5/4/2010 05:36:01 | 26.866 |
| 5/3/2010 07:47:01 | 24.992 6/13/2010 23:49:00 | 24.5 5/4/2010 05:56:01 | 26.866 |
| 5/3/2010 08:07:01 | 24.992 6/14/2010 00:24:00 | 24.0 5/4/2010 06:16:01 | 26.866 |
| 5/3/2010 08:27:01 | 24.992 6/14/2010 00:59:00 | 24.0 5/4/2010 06:36:01 | 26.866 |
| 5/3/2010 08:47:01 | 24.992 6/14/2010 01:34:00 | 24.0 5/4/2010 06:56:01 | 26.866 |
| 5/3/2010 09:07:01 | 24.929 6/14/2010 02:09:00 | 24.0 5/4/2010 07:16:01 | 26.866 |
| 5/3/2010 09:27:01 | 24.929 6/14/2010 02:44:00 | 24.0 5/4/2010 07:36:01 | 26.866 |
| 5/3/2010 09:47:01 | 24.929 6/14/2010 03:19:00 | 24.0 5/4/2010 07:56:01 | 26.866 |
| 5/3/2010 10:07:01 | 24.929 6/14/2010 03:54:00 | 24.0 5/4/2010 08:16:01 | 26.866 |
| 5/3/2010 10:27:01 | 24.929 6/14/2010 04:29:00 | 24.0 5/4/2010 08:36:01 | 26.866 |
| 5/3/2010 10:47:01 | 24.929 6/14/2010 05:04:00 | 24.0 5/4/2010 08:56:01 | 26.866 |
| 5/3/2010 11:07:01 | 24.929 6/14/2010 05:39:00 | 24.0 5/4/2010 09:16:01 | 26.804 |
| 5/3/2010 11:27:01 | 24.929 6/14/2010 06:14:00 | 24.0 5/4/2010 09:36:01 | 26.804 |
| 5/3/2010 11:47:01 | 24.929 6/14/2010 06:49:00 | 24.0 5/4/2010 09:56:01 | 26.804 |
| 5/3/2010 12:07:01 | 24.929 6/14/2010 07:24:00 | 24.0 5/4/2010 10:16:01 | 26.804 |
| 5/3/2010 12:27:01 | 24.929 6/14/2010 07:59:00 | 24.0 5/4/2010 10:36:01 | 26.804 |
| 5/3/2010 12:47:01 | 24.929 6/14/2010 08:34:00 | 24.0 5/4/2010 10:56:01 | 26.804 |
| 5/3/2010 13:07:01 | 24.929 6/14/2010 09:09:00 | 24.0 5/4/2010 11:16:01 | 26.804 |
| 5/3/2010 13:27:01 | 24.992 6/14/2010 09:44:00 | 23.5 5/4/2010 11:36:01 | 26.742 |
| 5/3/2010 13:47:01 | 24.992 6/14/2010 10:19:00 | 23.5 5/4/2010 11:56:01 | 26.742 |
| 5/3/2010 14:07:01 | 24.992 6/14/2010 10:54:00 | 23.5 5/4/2010 12:16:01 | 26.742 |
| 5/3/2010 14:27:01 | 25.054 6/14/2010 11:29:00 | 23.5 5/4/2010 12:36:01 | 26.742 |
| 5/3/2010 14:47:01 | 25.054 6/14/2010 12:04:00 | 23.5 5/4/2010 12:56:01 | 26.742 |
| 5/3/2010 15:07:01 | 25.117 6/14/2010 12:39:00 | 23.5 5/4/2010 13:16:01 | 26.742 |
| 5/3/2010 15:27:01 | 25.117 6/14/2010 13:14:00 | 23.5 5/4/2010 13:36:01 | 26.742 |
| 5/3/2010 15:47:01 | 25.179 6/14/2010 13:49:00 | 23.5 5/4/2010 13:56:01 | 26.742 |
| 5/3/2010 16:07:01 | 25.242 6/14/2010 14:24:00 | 23.5 5/4/2010 14:16:01 | 26.742 |
| 5/3/2010 16:27:01 | 25.242 6/14/2010 14:59:00 | 23.5 5/4/2010 14:36:01 | 26.742 |
| 5/3/2010 16:47:01 | 25.304 6/14/2010 15:34:00 | 24.0 5/4/2010 14:56:01 | 26.742 |
| 5/3/2010 17:07:01 | 25.304 6/14/2010 16:09:00 | 24.0 5/4/2010 15:16:01 | 26.742 |
| 5/3/2010 17:27:01 | 25.367 6/14/2010 16:44:00 | 24.0 5/4/2010 15:36:01 | 26.742 |

|                   |        |                    |      |                   |        |
|-------------------|--------|--------------------|------|-------------------|--------|
| 5/3/2010 17:47:01 | 25.367 | 6/14/2010 17:19:00 | 24.0 | 5/4/2010 15:56:01 | 26.742 |
| 5/3/2010 18:07:01 | 25.429 | 6/14/2010 17:54:00 | 24.0 | 5/4/2010 16:16:01 | 26.742 |
| 5/3/2010 18:27:01 | 25.429 | 6/14/2010 18:29:00 | 24.0 | 5/4/2010 16:36:01 | 26.742 |
| 5/3/2010 18:47:01 | 25.492 | 6/14/2010 19:04:00 | 24.0 | 5/4/2010 16:56:01 | 26.804 |
| 5/3/2010 19:07:01 | 25.492 | 6/14/2010 19:39:00 | 24.0 | 5/4/2010 17:16:01 | 26.804 |
| 5/3/2010 19:27:01 | 25.492 | 6/14/2010 20:14:00 | 24.0 | 5/4/2010 17:36:01 | 26.804 |
| 5/3/2010 19:47:01 | 25.554 | 6/14/2010 20:49:00 | 24.0 | 5/4/2010 17:56:01 | 26.804 |
| 5/3/2010 20:07:01 | 25.554 | 6/14/2010 21:24:00 | 24.0 | 5/4/2010 18:16:01 | 26.804 |
| 5/3/2010 20:27:01 | 25.554 | 6/14/2010 21:59:00 | 24.0 | 5/4/2010 18:36:01 | 26.804 |
| 5/3/2010 20:47:01 | 25.554 | 6/14/2010 22:34:00 | 24.0 | 5/4/2010 18:56:01 | 26.866 |
| 5/3/2010 21:07:01 | 25.554 | 6/14/2010 23:09:00 | 24.0 | 5/4/2010 19:16:01 | 26.866 |
| 5/3/2010 21:27:01 | 25.554 | 6/14/2010 23:44:00 | 24.0 | 5/4/2010 19:36:01 | 26.866 |
| 5/3/2010 21:47:01 | 25.554 | 6/15/2010 00:19:00 | 24.0 | 5/4/2010 19:56:01 | 26.866 |
| 5/3/2010 22:07:01 | 25.554 | 6/15/2010 00:54:00 | 24.0 | 5/4/2010 20:16:01 | 26.929 |
| 5/3/2010 22:27:01 | 25.554 | 6/15/2010 01:29:00 | 24.0 | 5/4/2010 20:36:01 | 26.929 |
| 5/3/2010 22:47:01 | 25.554 | 6/15/2010 02:04:00 | 24.0 | 5/4/2010 20:56:01 | 26.929 |
| 5/3/2010 23:07:01 | 25.554 | 6/15/2010 02:39:00 | 24.0 | 5/4/2010 21:16:01 | 26.929 |
| 5/3/2010 23:27:01 | 25.554 | 6/15/2010 03:14:00 | 24.0 | 5/4/2010 21:36:01 | 26.991 |
| 5/3/2010 23:47:01 | 25.554 | 6/15/2010 03:49:00 | 24.0 | 5/4/2010 21:56:01 | 26.991 |
| 5/4/2010 00:07:01 | 25.554 | 6/15/2010 04:24:00 | 24.0 | 5/4/2010 22:16:01 | 26.991 |
| 5/4/2010 00:27:01 | 25.554 | 6/15/2010 04:59:00 | 24.0 | 5/4/2010 22:36:01 | 26.991 |
| 5/4/2010 00:47:01 | 25.554 | 6/15/2010 05:34:00 | 24.0 | 5/4/2010 22:56:01 | 27.054 |
| 5/4/2010 01:07:01 | 25.492 | 6/15/2010 06:09:00 | 24.0 | 5/4/2010 23:16:01 | 27.054 |
| 5/4/2010 01:27:01 | 25.492 | 6/15/2010 06:44:00 | 24.0 | 5/4/2010 23:36:01 | 27.054 |
| 5/4/2010 01:47:01 | 25.492 | 6/15/2010 07:19:00 | 24.0 | 5/4/2010 23:56:01 | 27.054 |
| 5/4/2010 02:07:01 | 25.492 | 6/15/2010 07:54:00 | 24.0 | 5/5/2010 00:16:01 | 27.054 |
| 5/4/2010 02:27:01 | 25.492 | 6/15/2010 08:29:00 | 23.5 | 5/5/2010 00:36:01 | 27.054 |
| 5/4/2010 02:47:01 | 25.492 | 6/15/2010 09:04:00 | 23.5 | 5/5/2010 00:56:01 | 27.116 |
| 5/4/2010 03:07:01 | 25.492 | 6/15/2010 09:39:00 | 23.5 | 5/5/2010 01:16:01 | 27.116 |
| 5/4/2010 03:27:01 | 25.429 | 6/15/2010 10:14:00 | 23.5 | 5/5/2010 01:36:01 | 27.116 |
| 5/4/2010 03:47:01 | 25.429 | 6/15/2010 10:49:00 | 23.5 | 5/5/2010 01:56:01 | 27.116 |
| 5/4/2010 04:07:01 | 25.429 | 6/15/2010 11:24:00 | 23.5 | 5/5/2010 02:16:01 | 27.116 |
| 5/4/2010 04:27:01 | 25.429 | 6/15/2010 11:59:00 | 23.5 | 5/5/2010 02:36:01 | 27.116 |
| 5/4/2010 04:47:01 | 25.429 | 6/15/2010 12:34:00 | 23.5 | 5/5/2010 02:56:01 | 27.116 |
| 5/4/2010 05:07:01 | 25.429 | 6/15/2010 13:09:00 | 23.5 | 5/5/2010 03:16:01 | 27.116 |
| 5/4/2010 05:27:01 | 25.367 | 6/15/2010 13:44:00 | 24.0 | 5/5/2010 03:36:01 | 27.116 |
| 5/4/2010 05:47:01 | 25.367 | 6/15/2010 14:19:00 | 24.0 | 5/5/2010 03:56:01 | 27.116 |
| 5/4/2010 06:07:01 | 25.367 | 6/15/2010 14:54:00 | 24.0 | 5/5/2010 04:16:01 | 27.116 |
| 5/4/2010 06:27:01 | 25.367 | 6/15/2010 15:29:00 | 24.0 | 5/5/2010 04:36:01 | 27.116 |
| 5/4/2010 06:47:01 | 25.367 | 6/15/2010 16:04:00 | 24.0 | 5/5/2010 04:56:01 | 27.116 |
| 5/4/2010 07:07:01 | 25.304 | 6/15/2010 16:39:00 | 24.0 | 5/5/2010 05:16:01 | 27.116 |
| 5/4/2010 07:27:01 | 25.304 | 6/15/2010 17:14:00 | 24.0 | 5/5/2010 05:36:01 | 27.116 |
| 5/4/2010 07:47:01 | 25.304 | 6/15/2010 17:49:00 | 24.0 | 5/5/2010 05:56:01 | 27.054 |
| 5/4/2010 08:07:01 | 25.304 | 6/15/2010 18:24:00 | 24.0 | 5/5/2010 06:16:01 | 27.054 |
| 5/4/2010 08:27:01 | 25.304 | 6/15/2010 18:59:00 | 24.0 | 5/5/2010 06:36:01 | 27.054 |
| 5/4/2010 08:47:01 | 25.242 | 6/15/2010 19:34:00 | 24.0 | 5/5/2010 06:56:01 | 27.054 |
| 5/4/2010 09:07:01 | 25.242 | 6/15/2010 20:09:00 | 24.0 | 5/5/2010 07:16:01 | 27.054 |
| 5/4/2010 09:27:01 | 25.242 | 6/15/2010 20:44:00 | 24.0 | 5/5/2010 07:36:01 | 27.054 |
| 5/4/2010 09:47:01 | 25.242 | 6/15/2010 21:19:00 | 24.0 | 5/5/2010 07:56:01 | 26.991 |
| 5/4/2010 10:07:01 | 25.242 | 6/15/2010 21:54:00 | 24.0 | 5/5/2010 08:16:01 | 26.991 |

|                   |                           |                        |        |
|-------------------|---------------------------|------------------------|--------|
| 5/4/2010 10:27:01 | 25.179 6/15/2010 22:29:00 | 24.0 5/5/2010 08:36:01 | 26.991 |
| 5/4/2010 10:47:01 | 25.179 6/15/2010 23:04:00 | 24.5 5/5/2010 08:56:01 | 26.991 |
| 5/4/2010 11:07:01 | 25.179 6/15/2010 23:39:00 | 24.5 5/5/2010 09:16:01 | 26.929 |
| 5/4/2010 11:27:01 | 25.179 6/16/2010 00:14:00 | 24.5 5/5/2010 09:36:01 | 26.929 |
| 5/4/2010 11:47:01 | 25.179 6/16/2010 00:49:00 | 24.5 5/5/2010 09:56:01 | 26.929 |
| 5/4/2010 12:07:01 | 25.179 6/16/2010 01:24:00 | 24.5 5/5/2010 10:16:01 | 26.929 |
| 5/4/2010 12:27:01 | 25.242 6/16/2010 01:59:00 | 24.5 5/5/2010 10:36:01 | 26.866 |
| 5/4/2010 12:47:01 | 25.179 6/16/2010 02:34:00 | 24.5 5/5/2010 10:56:01 | 26.866 |
| 5/4/2010 13:07:01 | 25.242 6/16/2010 03:09:00 | 24.5 5/5/2010 11:16:01 | 26.866 |
| 5/4/2010 13:27:01 | 25.242 6/16/2010 03:44:00 | 24.0 5/5/2010 11:36:01 | 26.866 |
| 5/4/2010 13:47:01 | 25.242 6/16/2010 04:19:00 | 24.0 5/5/2010 11:56:01 | 26.866 |
| 5/4/2010 14:07:01 | 25.304 6/16/2010 04:54:00 | 24.0 5/5/2010 12:16:01 | 26.804 |
| 5/4/2010 14:27:01 | 25.304 6/16/2010 05:29:00 | 24.0 5/5/2010 12:36:01 | 26.804 |
| 5/4/2010 14:47:01 | 25.367 6/16/2010 06:04:00 | 24.0 5/5/2010 12:56:01 | 26.804 |
| 5/4/2010 15:07:01 | 25.367 6/16/2010 06:39:00 | 24.0 5/5/2010 13:16:01 | 26.804 |
| 5/4/2010 15:27:01 | 25.429 6/16/2010 07:14:00 | 24.0 5/5/2010 13:36:01 | 26.804 |
| 5/4/2010 15:47:01 | 25.429 6/16/2010 07:49:00 | 24.0 5/5/2010 13:56:01 | 26.804 |
| 5/4/2010 16:07:01 | 25.492 6/16/2010 08:24:00 | 24.0 5/5/2010 14:16:01 | 26.804 |
| 5/4/2010 16:27:01 | 25.492 6/16/2010 08:59:00 | 24.0 5/5/2010 14:36:01 | 26.742 |
| 5/4/2010 16:47:01 | 25.554 6/16/2010 09:34:00 | 24.0 5/5/2010 14:56:01 | 26.742 |
| 5/4/2010 17:07:01 | 25.554 6/16/2010 10:09:00 | 24.0 5/5/2010 15:16:01 | 26.742 |
| 5/4/2010 17:27:01 | 25.617 6/16/2010 10:44:00 | 24.0 5/5/2010 15:36:01 | 26.742 |
| 5/4/2010 17:47:01 | 25.617 6/16/2010 11:19:00 | 24.0 5/5/2010 15:56:01 | 26.742 |
| 5/4/2010 18:07:01 | 25.679 6/16/2010 11:54:00 | 24.0 5/5/2010 16:16:01 | 26.742 |
| 5/4/2010 18:27:01 | 25.679 6/16/2010 12:29:00 | 24.0 5/5/2010 16:36:01 | 26.742 |
| 5/4/2010 18:47:01 | 25.679 6/16/2010 13:04:00 | 24.0 5/5/2010 16:56:01 | 26.804 |
| 5/4/2010 19:07:01 | 25.742 6/16/2010 13:39:00 | 24.0 5/5/2010 17:16:01 | 26.804 |
| 5/4/2010 19:27:01 | 25.742 6/16/2010 14:14:00 | 24.0 5/5/2010 17:36:01 | 26.804 |
| 5/4/2010 19:47:01 | 25.742 6/16/2010 14:49:00 | 24.0 5/5/2010 17:56:01 | 26.804 |
| 5/4/2010 20:07:01 | 25.742 6/16/2010 15:24:00 | 24.0 5/5/2010 18:16:01 | 26.804 |
| 5/4/2010 20:27:01 | 25.742 6/16/2010 15:59:00 | 24.0 5/5/2010 18:36:01 | 26.804 |
| 5/4/2010 20:47:01 | 25.804 6/16/2010 16:34:00 | 24.0 5/5/2010 18:56:01 | 26.866 |
| 5/4/2010 21:07:01 | 25.804 6/16/2010 17:09:00 | 24.0 5/5/2010 19:16:01 | 26.866 |
| 5/4/2010 21:27:01 | 25.804 6/16/2010 17:44:00 | 24.0 5/5/2010 19:36:01 | 26.866 |
| 5/4/2010 21:47:01 | 25.804 6/16/2010 18:19:00 | 24.0 5/5/2010 19:56:01 | 26.866 |
| 5/4/2010 22:07:01 | 25.804 6/16/2010 18:54:00 | 24.0 5/5/2010 20:16:01 | 26.866 |
| 5/4/2010 22:27:01 | 25.804 6/16/2010 19:29:00 | 24.0 5/5/2010 20:36:01 | 26.929 |
| 5/4/2010 22:47:01 | 25.804 6/16/2010 20:04:00 | 24.5 5/5/2010 20:56:01 | 26.929 |
| 5/4/2010 23:07:01 | 25.804 6/16/2010 20:39:00 | 24.5 5/5/2010 21:16:01 | 26.929 |
| 5/4/2010 23:27:01 | 25.804 6/16/2010 21:14:00 | 24.5 5/5/2010 21:36:01 | 26.929 |
| 5/4/2010 23:47:01 | 25.804 6/16/2010 21:49:00 | 24.5 5/5/2010 21:56:01 | 26.991 |
| 5/5/2010 00:07:01 | 25.804 6/16/2010 22:24:00 | 24.5 5/5/2010 22:16:01 | 26.991 |
| 5/5/2010 00:27:01 | 25.804 6/16/2010 22:59:00 | 24.5 5/5/2010 22:36:01 | 26.991 |
| 5/5/2010 00:47:01 | 25.742 6/16/2010 23:34:00 | 24.5 5/5/2010 22:56:01 | 26.991 |
| 5/5/2010 01:07:01 | 25.742 6/17/2010 00:09:00 | 24.5 5/5/2010 23:16:01 | 26.991 |
| 5/5/2010 01:27:01 | 25.742 6/17/2010 00:44:00 | 24.5 5/5/2010 23:36:01 | 26.991 |
| 5/5/2010 01:47:01 | 25.742 6/17/2010 01:19:00 | 24.5 5/5/2010 23:56:01 | 27.054 |
| 5/5/2010 02:07:01 | 25.679 6/17/2010 01:54:00 | 24.5 5/6/2010 00:16:01 | 27.054 |
| 5/5/2010 02:27:01 | 25.679 6/17/2010 02:29:00 | 24.5 5/6/2010 00:36:01 | 27.054 |
| 5/5/2010 02:47:01 | 25.679 6/17/2010 03:04:00 | 24.5 5/6/2010 00:56:01 | 27.054 |

|                   |        |                    |      |                   |        |
|-------------------|--------|--------------------|------|-------------------|--------|
| 5/5/2010 03:07:01 | 25.679 | 6/17/2010 03:39:00 | 24.0 | 5/6/2010 01:16:01 | 27.054 |
| 5/5/2010 03:27:01 | 25.617 | 6/17/2010 04:14:00 | 24.0 | 5/6/2010 01:36:01 | 27.054 |
| 5/5/2010 03:47:01 | 25.617 | 6/17/2010 04:49:00 | 24.0 | 5/6/2010 01:56:01 | 27.054 |
| 5/5/2010 04:07:01 | 25.554 | 6/17/2010 05:24:00 | 24.0 | 5/6/2010 02:16:01 | 27.054 |
| 5/5/2010 04:27:01 | 25.554 | 6/17/2010 05:59:00 | 24.0 | 5/6/2010 02:36:01 | 26.991 |
| 5/5/2010 04:47:01 | 25.554 | 6/17/2010 06:34:00 | 24.0 | 5/6/2010 02:56:01 | 26.991 |
| 5/5/2010 05:07:01 | 25.492 | 6/17/2010 07:09:00 | 24.0 | 5/6/2010 03:16:01 | 26.991 |
| 5/5/2010 05:27:01 | 25.492 | 6/17/2010 07:44:00 | 24.0 | 5/6/2010 03:36:01 | 26.991 |
| 5/5/2010 05:47:01 | 25.429 | 6/17/2010 08:19:00 | 24.0 | 5/6/2010 03:56:01 | 26.991 |
| 5/5/2010 06:07:01 | 25.429 | 6/17/2010 08:54:00 | 24.0 | 5/6/2010 04:16:01 | 26.991 |
| 5/5/2010 06:27:01 | 25.367 | 6/17/2010 09:29:00 | 24.0 | 5/6/2010 04:36:01 | 26.991 |
| 5/5/2010 06:47:01 | 25.367 | 6/17/2010 10:04:00 | 24.0 | 5/6/2010 04:56:01 | 26.991 |
| 5/5/2010 07:07:01 | 25.367 | 6/17/2010 10:39:00 | 24.0 | 5/6/2010 05:16:01 | 26.991 |
| 5/5/2010 07:27:01 | 25.304 | 6/17/2010 11:14:00 | 24.0 | 5/6/2010 05:36:01 | 26.991 |
| 5/5/2010 07:47:01 | 25.304 | 6/17/2010 11:49:00 | 24.0 | 5/6/2010 05:56:01 | 26.929 |
| 5/5/2010 08:07:01 | 25.242 | 6/17/2010 12:24:00 | 24.0 | 5/6/2010 06:16:01 | 26.929 |
| 5/5/2010 08:27:01 | 25.242 | 6/17/2010 12:59:00 | 24.0 | 5/6/2010 06:36:01 | 26.929 |
| 5/5/2010 08:47:01 | 25.179 | 6/17/2010 13:34:00 | 24.0 | 5/6/2010 06:56:01 | 26.929 |
| 5/5/2010 09:07:01 | 25.179 | 6/17/2010 14:09:00 | 24.0 | 5/6/2010 07:16:01 | 26.929 |
| 5/5/2010 09:27:01 | 25.117 | 6/17/2010 14:44:00 | 24.0 | 5/6/2010 07:36:01 | 26.929 |
| 5/5/2010 09:47:01 | 25.117 | 6/17/2010 15:19:00 | 24.0 | 5/6/2010 07:56:01 | 26.929 |
| 5/5/2010 10:07:01 | 25.117 | 6/17/2010 15:54:00 | 24.0 | 5/6/2010 08:16:01 | 26.866 |
| 5/5/2010 10:27:01 | 25.054 | 6/17/2010 16:29:00 | 24.0 | 5/6/2010 08:36:01 | 26.866 |
| 5/5/2010 10:47:01 | 25.054 | 6/17/2010 17:04:00 | 24.0 | 5/6/2010 08:56:01 | 26.866 |
| 5/5/2010 11:07:01 | 25.054 | 6/17/2010 17:39:00 | 24.5 | 5/6/2010 09:16:01 | 26.866 |
| 5/5/2010 11:27:01 | 25.054 | 6/17/2010 18:14:00 | 24.5 | 5/6/2010 09:36:01 | 26.866 |
| 5/5/2010 11:47:01 | 25.054 | 6/17/2010 18:49:00 | 24.5 | 5/6/2010 09:56:01 | 26.804 |
| 5/5/2010 12:07:01 | 25.054 | 6/17/2010 19:24:00 | 24.5 | 5/6/2010 10:16:01 | 26.804 |
| 5/5/2010 12:27:01 | 25.054 | 6/17/2010 19:59:00 | 24.5 | 5/6/2010 10:36:01 | 26.804 |
| 5/5/2010 12:47:01 | 25.054 | 6/17/2010 20:34:00 | 24.5 | 5/6/2010 10:56:01 | 26.804 |
| 5/5/2010 13:07:01 | 25.054 | 6/17/2010 21:09:00 | 24.5 | 5/6/2010 11:16:01 | 26.804 |
| 5/5/2010 13:27:01 | 25.054 | 6/17/2010 21:44:00 | 24.5 | 5/6/2010 11:36:01 | 26.742 |
| 5/5/2010 13:47:01 | 25.117 | 6/17/2010 22:19:00 | 24.5 | 5/6/2010 11:56:01 | 26.742 |
| 5/5/2010 14:07:01 | 25.117 | 6/17/2010 22:54:00 | 24.5 | 5/6/2010 12:16:01 | 26.742 |
| 5/5/2010 14:27:01 | 25.117 | 6/17/2010 23:29:00 | 24.5 | 5/6/2010 12:36:01 | 26.742 |
| 5/5/2010 14:47:01 | 25.179 | 6/18/2010 00:04:00 | 24.5 | 5/6/2010 12:56:01 | 26.742 |
| 5/5/2010 15:07:01 | 25.179 | 6/18/2010 00:39:00 | 24.5 | 5/6/2010 13:16:01 | 26.742 |
| 5/5/2010 15:27:01 | 25.242 | 6/18/2010 01:14:00 | 24.5 | 5/6/2010 13:36:01 | 26.679 |
| 5/5/2010 15:47:01 | 25.242 | 6/18/2010 01:49:00 | 24.5 | 5/6/2010 13:56:01 | 26.679 |
| 5/5/2010 16:07:01 | 25.304 | 6/18/2010 02:24:00 | 24.5 | 5/6/2010 14:16:01 | 26.679 |
| 5/5/2010 16:27:01 | 25.304 | 6/18/2010 02:59:00 | 24.5 | 5/6/2010 14:36:01 | 26.679 |
| 5/5/2010 16:47:01 | 25.367 | 6/18/2010 03:34:00 | 24.5 | 5/6/2010 14:56:01 | 26.679 |
| 5/5/2010 17:07:01 | 25.429 | 6/18/2010 04:09:00 | 24.5 | 5/6/2010 15:16:01 | 26.679 |
| 5/5/2010 17:27:01 | 25.429 | 6/18/2010 04:44:00 | 24.5 | 5/6/2010 15:36:01 | 26.679 |
| 5/5/2010 17:47:01 | 25.492 | 6/18/2010 05:19:00 | 24.5 | 5/6/2010 15:56:01 | 26.742 |
| 5/5/2010 18:07:01 | 25.492 | 6/18/2010 05:54:00 | 24.0 | 5/6/2010 16:16:01 | 26.742 |
| 5/5/2010 18:27:01 | 25.492 | 6/18/2010 06:29:00 | 24.0 | 5/6/2010 16:36:01 | 26.742 |
| 5/5/2010 18:47:01 | 25.554 | 6/18/2010 07:04:00 | 24.0 | 5/6/2010 16:56:01 | 26.742 |
| 5/5/2010 19:07:01 | 25.554 | 6/18/2010 07:39:00 | 24.0 | 5/6/2010 17:16:01 | 26.742 |
| 5/5/2010 19:27:01 | 25.554 | 6/18/2010 08:14:00 | 24.0 | 5/6/2010 17:36:01 | 26.742 |



|                   |                           |                        |        |
|-------------------|---------------------------|------------------------|--------|
| 5/5/2010 19:47:01 | 25.554 6/18/2010 08:49:00 | 24.0 5/6/2010 17:56:01 | 26.804 |
| 5/5/2010 20:07:01 | 25.554 6/18/2010 09:24:00 | 24.0 5/6/2010 18:16:01 | 26.804 |
| 5/5/2010 20:27:01 | 25.617 6/18/2010 09:59:00 | 24.0 5/6/2010 18:36:01 | 26.804 |
| 5/5/2010 20:47:01 | 25.617 6/18/2010 10:34:00 | 24.0 5/6/2010 18:56:01 | 26.804 |
| 5/5/2010 21:07:01 | 25.617 6/18/2010 11:09:00 | 24.0 5/6/2010 19:16:01 | 26.866 |
| 5/5/2010 21:27:01 | 25.617 6/18/2010 11:44:00 | 24.0 5/6/2010 19:36:01 | 26.866 |
| 5/5/2010 21:47:01 | 25.617 6/18/2010 12:19:00 | 24.0 5/6/2010 19:56:01 | 26.866 |
| 5/5/2010 22:07:01 | 25.554 6/18/2010 12:54:00 | 24.0 5/6/2010 20:16:01 | 26.866 |
| 5/5/2010 22:27:01 | 25.554 6/18/2010 13:29:00 | 24.0 5/6/2010 20:36:01 | 26.866 |
| 5/5/2010 22:47:01 | 25.554 6/18/2010 14:04:00 | 24.0 5/6/2010 20:56:01 | 26.929 |
| 5/5/2010 23:07:01 | 25.554 6/18/2010 14:39:00 | 24.0 5/6/2010 21:16:01 | 26.929 |
| 5/5/2010 23:27:01 | 25.554 6/18/2010 15:14:00 | 24.0 5/6/2010 21:36:01 | 26.929 |
| 5/5/2010 23:47:01 | 25.554 6/18/2010 15:49:00 | 24.0 5/6/2010 21:56:01 | 26.929 |
| 5/6/2010 00:07:01 | 25.492 6/18/2010 16:24:00 | 24.5 5/6/2010 22:16:01 | 26.929 |
| 5/6/2010 00:27:01 | 25.492 6/18/2010 16:59:00 | 24.5 5/6/2010 22:36:01 | 26.991 |
| 5/6/2010 00:47:01 | 25.492 6/18/2010 17:34:00 | 24.5 5/6/2010 22:56:01 | 26.991 |
| 5/6/2010 01:07:01 | 25.492 6/18/2010 18:09:00 | 24.5 5/6/2010 23:16:01 | 26.991 |
| 5/6/2010 01:27:01 | 25.429 6/18/2010 18:44:00 | 24.5 5/6/2010 23:36:01 | 26.991 |
| 5/6/2010 01:47:01 | 25.429 6/18/2010 19:19:00 | 24.5 5/6/2010 23:56:01 | 26.991 |
| 5/6/2010 02:07:01 | 25.429 6/18/2010 19:54:00 | 24.5 5/7/2010 00:16:01 | 26.991 |
| 5/6/2010 02:27:01 | 25.429 6/18/2010 20:29:00 | 24.5 5/7/2010 00:36:01 | 26.991 |
| 5/6/2010 02:47:01 | 25.367 6/18/2010 21:04:00 | 24.5 5/7/2010 00:56:01 | 26.991 |
| 5/6/2010 03:07:01 | 25.367 6/18/2010 21:39:00 | 24.5 5/7/2010 01:16:01 | 26.991 |
| 5/6/2010 03:27:01 | 25.367 6/18/2010 22:14:00 | 24.5 5/7/2010 01:36:01 | 26.991 |
| 5/6/2010 03:47:01 | 25.367 6/18/2010 22:49:00 | 24.5 5/7/2010 01:56:01 | 26.991 |
| 5/6/2010 04:07:01 | 25.304 6/18/2010 23:24:00 | 24.5 5/7/2010 02:16:01 | 26.991 |
| 5/6/2010 04:27:01 | 25.304 6/18/2010 23:59:00 | 24.5 5/7/2010 02:36:01 | 26.991 |
| 5/6/2010 04:47:01 | 25.304 6/19/2010 00:34:00 | 24.5 5/7/2010 02:56:01 | 26.991 |
| 5/6/2010 05:07:01 | 25.304 6/19/2010 01:09:00 | 24.5 5/7/2010 03:16:01 | 26.991 |
| 5/6/2010 05:27:01 | 25.242 6/19/2010 01:44:00 | 24.5 5/7/2010 03:36:01 | 26.991 |
| 5/6/2010 05:47:01 | 25.242 6/19/2010 02:19:00 | 24.5 5/7/2010 03:56:01 | 26.991 |
| 5/6/2010 06:07:01 | 25.242 6/19/2010 02:54:00 | 24.5 5/7/2010 04:16:01 | 26.991 |
| 5/6/2010 06:27:01 | 25.242 6/19/2010 03:29:00 | 24.0 5/7/2010 04:36:01 | 26.991 |
| 5/6/2010 06:47:01 | 25.179 6/19/2010 04:04:00 | 24.0 5/7/2010 04:56:01 | 26.991 |
| 5/6/2010 07:07:01 | 25.179 6/19/2010 04:39:00 | 24.0 5/7/2010 05:16:01 | 26.929 |
| 5/6/2010 07:27:01 | 25.179 6/19/2010 05:14:00 | 24.0 5/7/2010 05:36:01 | 26.929 |
| 5/6/2010 07:47:01 | 25.117 6/19/2010 05:49:00 | 24.0 5/7/2010 05:56:01 | 26.929 |
| 5/6/2010 08:07:01 | 25.117 6/19/2010 06:24:00 | 24.0 5/7/2010 06:16:01 | 26.929 |
| 5/6/2010 08:27:01 | 25.117 6/19/2010 06:59:00 | 24.0 5/7/2010 06:36:01 | 26.929 |
| 5/6/2010 08:47:01 | 25.117 6/19/2010 07:34:00 | 24.0 5/7/2010 06:56:01 | 26.866 |
| 5/6/2010 09:07:01 | 25.054 6/19/2010 08:09:00 | 24.0 5/7/2010 07:16:01 | 26.866 |
| 5/6/2010 09:27:01 | 25.054 6/19/2010 08:44:00 | 24.0 5/7/2010 07:36:01 | 26.866 |
| 5/6/2010 09:47:01 | 25.054 6/19/2010 09:19:00 | 24.0 5/7/2010 07:56:01 | 26.866 |
| 5/6/2010 10:07:01 | 24.992 6/19/2010 09:54:00 | 24.0 5/7/2010 08:16:01 | 26.866 |
| 5/6/2010 10:27:01 | 24.992 6/19/2010 10:29:00 | 24.0 5/7/2010 08:36:01 | 26.804 |
| 5/6/2010 10:47:01 | 24.992 6/19/2010 11:04:00 | 24.0 5/7/2010 08:56:01 | 26.804 |
| 5/6/2010 11:07:01 | 24.992 6/19/2010 11:39:00 | 24.0 5/7/2010 09:16:01 | 26.804 |
| 5/6/2010 11:27:01 | 24.992 6/19/2010 12:14:00 | 24.0 5/7/2010 09:36:01 | 26.804 |
| 5/6/2010 11:47:01 | 24.992 6/19/2010 12:49:00 | 24.0 5/7/2010 09:56:01 | 26.804 |
| 5/6/2010 12:07:01 | 24.992 6/19/2010 13:24:00 | 24.0 5/7/2010 10:16:01 | 26.742 |

|                   |        |                    |      |                   |        |
|-------------------|--------|--------------------|------|-------------------|--------|
| 5/6/2010 12:27:01 | 24.992 | 6/19/2010 13:59:00 | 24.0 | 5/7/2010 10:36:01 | 26.742 |
| 5/6/2010 12:47:01 | 24.992 | 6/19/2010 14:34:00 | 24.0 | 5/7/2010 10:56:01 | 26.742 |
| 5/6/2010 13:07:01 | 25.054 | 6/19/2010 15:09:00 | 24.0 | 5/7/2010 11:16:01 | 26.742 |
| 5/6/2010 13:27:01 | 25.054 | 6/19/2010 15:44:00 | 24.0 | 5/7/2010 11:36:01 | 26.679 |
| 5/6/2010 13:47:01 | 25.054 | 6/19/2010 16:19:00 | 24.0 | 5/7/2010 11:56:01 | 26.679 |
| 5/6/2010 14:07:01 | 25.054 | 6/19/2010 16:54:00 | 24.0 | 5/7/2010 12:16:01 | 26.679 |
| 5/6/2010 14:27:01 | 25.117 | 6/19/2010 17:29:00 | 24.0 | 5/7/2010 12:36:01 | 26.679 |
| 5/6/2010 14:47:01 | 25.179 | 6/19/2010 18:04:00 | 24.0 | 5/7/2010 12:56:01 | 26.679 |
| 5/6/2010 15:07:01 | 25.179 | 6/19/2010 18:39:00 | 24.0 | 5/7/2010 13:16:01 | 26.617 |
| 5/6/2010 15:27:01 | 25.242 | 6/19/2010 19:14:00 | 24.5 | 5/7/2010 13:36:01 | 26.617 |
| 5/6/2010 15:47:01 | 25.242 | 6/19/2010 19:49:00 | 24.5 | 5/7/2010 13:56:01 | 26.617 |
| 5/6/2010 16:07:01 | 25.304 | 6/19/2010 20:24:00 | 24.5 | 5/7/2010 14:16:01 | 26.617 |
| 5/6/2010 16:27:01 | 25.304 | 6/19/2010 20:59:00 | 24.5 | 5/7/2010 14:36:01 | 26.617 |
| 5/6/2010 16:47:01 | 25.367 | 6/19/2010 21:34:00 | 24.5 | 5/7/2010 14:56:01 | 26.617 |
| 5/6/2010 17:07:01 | 25.429 | 6/19/2010 22:09:00 | 24.5 | 5/7/2010 15:16:01 | 26.617 |
| 5/6/2010 17:27:01 | 25.429 | 6/19/2010 22:44:00 | 24.5 | 5/7/2010 15:36:01 | 26.617 |
| 5/6/2010 17:47:01 | 25.429 | 6/19/2010 23:19:00 | 24.5 | 5/7/2010 15:56:01 | 26.617 |
| 5/6/2010 18:07:01 | 25.492 | 6/19/2010 23:54:00 | 24.5 | 5/7/2010 16:16:01 | 26.617 |
| 5/6/2010 18:27:01 | 25.492 | 6/20/2010 00:29:00 | 24.5 | 5/7/2010 16:36:01 | 26.617 |
| 5/6/2010 18:47:01 | 25.554 | 6/20/2010 01:04:00 | 24.0 | 5/7/2010 16:56:01 | 26.617 |
| 5/6/2010 19:07:01 | 25.554 | 6/20/2010 01:39:00 | 24.0 | 5/7/2010 17:16:01 | 26.617 |
| 5/6/2010 19:27:01 | 25.554 | 6/20/2010 02:14:00 | 24.0 | 5/7/2010 17:36:01 | 26.679 |
| 5/6/2010 19:47:01 | 25.554 | 6/20/2010 02:49:00 | 24.0 | 5/7/2010 17:56:01 | 26.679 |
| 5/6/2010 20:07:01 | 25.554 | 6/20/2010 03:24:00 | 24.0 | 5/7/2010 18:16:01 | 26.679 |
| 5/6/2010 20:27:01 | 25.554 | 6/20/2010 03:59:00 | 24.0 | 5/7/2010 18:36:01 | 26.679 |
| 5/6/2010 20:47:01 | 25.554 | 6/20/2010 04:34:00 | 24.0 | 5/7/2010 18:56:01 | 26.679 |
| 5/6/2010 21:07:01 | 25.554 | 6/20/2010 05:09:00 | 24.0 | 5/7/2010 19:16:01 | 26.742 |
| 5/6/2010 21:27:01 | 25.554 | 6/20/2010 05:44:00 | 24.0 | 5/7/2010 19:36:01 | 26.742 |
| 5/6/2010 21:47:01 | 25.554 | 6/20/2010 06:19:00 | 24.0 | 5/7/2010 19:56:01 | 26.742 |
| 5/6/2010 22:07:01 | 25.554 | 6/20/2010 06:54:00 | 24.0 | 5/7/2010 20:16:01 | 26.742 |
| 5/6/2010 22:27:01 | 25.554 | 6/20/2010 07:29:00 | 24.0 | 5/7/2010 20:36:01 | 26.804 |
| 5/6/2010 22:47:01 | 25.554 | 6/20/2010 08:04:00 | 24.0 | 5/7/2010 20:56:01 | 26.804 |
| 5/6/2010 23:07:01 | 25.492 | 6/20/2010 08:39:00 | 24.0 | 5/7/2010 21:16:01 | 26.804 |
| 5/6/2010 23:27:01 | 25.492 | 6/20/2010 09:14:00 | 24.0 | 5/7/2010 21:36:01 | 26.804 |
| 5/6/2010 23:47:01 | 25.492 | 6/20/2010 09:49:00 | 24.0 | 5/7/2010 21:56:01 | 26.804 |
| 5/7/2010 00:07:01 | 25.492 | 6/20/2010 10:24:00 | 24.0 | 5/7/2010 22:16:01 | 26.804 |
| 5/7/2010 00:27:01 | 25.429 | 6/20/2010 10:59:00 | 24.0 | 5/7/2010 22:36:01 | 26.866 |
| 5/7/2010 00:47:01 | 25.429 | 6/20/2010 11:34:00 | 24.0 | 5/7/2010 22:56:01 | 26.866 |
| 5/7/2010 01:07:01 | 25.429 | 6/20/2010 12:09:00 | 24.0 | 5/7/2010 23:16:01 | 26.866 |
| 5/7/2010 01:27:01 | 25.367 | 6/20/2010 12:44:00 | 24.0 | 5/7/2010 23:36:01 | 26.866 |
| 5/7/2010 01:47:01 | 25.367 | 6/20/2010 13:19:00 | 24.0 | 5/7/2010 23:56:01 | 26.866 |
| 5/7/2010 02:07:01 | 25.367 | 6/20/2010 13:54:00 | 24.0 | 5/8/2010 00:16:01 | 26.866 |
| 5/7/2010 02:27:01 | 25.304 | 6/20/2010 14:29:00 | 24.0 | 5/8/2010 00:36:01 | 26.866 |
| 5/7/2010 02:47:01 | 25.304 | 6/20/2010 15:04:00 | 24.0 | 5/8/2010 00:56:01 | 26.866 |
| 5/7/2010 03:07:01 | 25.304 | 6/20/2010 15:39:00 | 24.0 | 5/8/2010 01:16:01 | 26.866 |
| 5/7/2010 03:27:01 | 25.242 | 6/20/2010 16:14:00 | 24.0 | 5/8/2010 01:36:01 | 26.866 |
| 5/7/2010 03:47:01 | 25.242 | 6/20/2010 16:49:00 | 24.0 | 5/8/2010 01:56:01 | 26.866 |
| 5/7/2010 04:07:01 | 25.179 | 6/20/2010 17:24:00 | 24.0 | 5/8/2010 02:16:01 | 26.866 |
| 5/7/2010 04:27:01 | 25.179 | 6/20/2010 17:59:00 | 24.0 | 5/8/2010 02:36:01 | 26.866 |
| 5/7/2010 04:47:01 | 25.179 | 6/20/2010 18:34:00 | 24.5 | 5/8/2010 02:56:01 | 26.866 |

|                   |        |                    |      |                   |        |
|-------------------|--------|--------------------|------|-------------------|--------|
| 5/7/2010 05:07:01 | 25.117 | 6/20/2010 19:09:00 | 24.5 | 5/8/2010 03:16:01 | 26.866 |
| 5/7/2010 05:27:01 | 25.117 | 6/20/2010 19:44:00 | 24.5 | 5/8/2010 03:36:01 | 26.866 |
| 5/7/2010 05:47:01 | 25.054 | 6/20/2010 20:19:00 | 24.5 | 5/8/2010 03:56:01 | 26.866 |
| 5/7/2010 06:07:01 | 25.054 | 6/20/2010 20:54:00 | 24.5 | 5/8/2010 04:16:01 | 26.866 |
| 5/7/2010 06:27:01 | 25.054 | 6/20/2010 21:29:00 | 24.5 | 5/8/2010 04:36:01 | 26.866 |
| 5/7/2010 06:47:01 | 24.992 | 6/20/2010 22:04:00 | 24.5 | 5/8/2010 04:56:01 | 26.804 |
| 5/7/2010 07:07:01 | 24.992 | 6/20/2010 22:39:00 | 24.5 | 5/8/2010 05:16:01 | 26.804 |
| 5/7/2010 07:27:01 | 24.929 | 6/20/2010 23:14:00 | 24.5 | 5/8/2010 05:36:01 | 26.804 |
| 5/7/2010 07:47:01 | 24.929 | 6/20/2010 23:49:00 | 24.0 | 5/8/2010 05:56:01 | 26.804 |
| 5/7/2010 08:07:01 | 24.867 | 6/21/2010 00:24:00 | 24.0 | 5/8/2010 06:16:01 | 26.804 |
| 5/7/2010 08:27:01 | 24.867 | 6/21/2010 00:59:00 | 24.0 | 5/8/2010 06:36:01 | 26.804 |
| 5/7/2010 08:47:01 | 24.867 | 6/21/2010 01:34:00 | 24.0 | 5/8/2010 06:56:01 | 26.742 |
| 5/7/2010 09:07:01 | 24.804 | 6/21/2010 02:09:00 | 24.0 | 5/8/2010 07:16:01 | 26.742 |
| 5/7/2010 09:27:01 | 24.804 | 6/21/2010 02:44:00 | 24.0 | 5/8/2010 07:36:01 | 26.742 |
| 5/7/2010 09:47:01 | 24.742 | 6/21/2010 03:19:00 | 24.0 | 5/8/2010 07:56:01 | 26.742 |
| 5/7/2010 10:07:01 | 24.742 | 6/21/2010 03:54:00 | 24.0 | 5/8/2010 08:16:01 | 26.679 |
| 5/7/2010 10:27:01 | 24.742 | 6/21/2010 04:29:00 | 24.0 | 5/8/2010 08:36:01 | 26.679 |
| 5/7/2010 10:47:01 | 24.742 | 6/21/2010 05:04:00 | 24.0 | 5/8/2010 08:56:01 | 26.679 |
| 5/7/2010 11:07:01 | 24.742 | 6/21/2010 05:39:00 | 24.0 | 5/8/2010 09:16:01 | 26.679 |
| 5/7/2010 11:27:01 | 24.679 | 6/21/2010 06:14:00 | 24.0 | 5/8/2010 09:36:01 | 26.617 |
| 5/7/2010 11:47:01 | 24.742 | 6/21/2010 06:49:00 | 24.0 | 5/8/2010 09:56:01 | 26.617 |
| 5/7/2010 12:07:01 | 24.742 | 6/21/2010 07:24:00 | 24.0 | 5/8/2010 10:16:01 | 26.617 |
| 5/7/2010 12:27:01 | 24.742 | 6/21/2010 07:59:00 | 24.0 | 5/8/2010 10:36:01 | 26.554 |
| 5/7/2010 12:47:01 | 24.742 | 6/21/2010 08:34:00 | 23.5 | 5/8/2010 10:56:01 | 26.554 |
| 5/7/2010 13:07:01 | 24.742 | 6/21/2010 09:09:00 | 23.5 | 5/8/2010 11:16:01 | 26.554 |
| 5/7/2010 13:27:01 | 24.742 | 6/21/2010 09:44:00 | 23.5 | 5/8/2010 11:36:01 | 26.554 |
| 5/7/2010 13:47:01 | 24.804 | 6/21/2010 10:19:00 | 23.5 | 5/8/2010 11:56:01 | 26.554 |
| 5/7/2010 14:07:01 | 24.804 | 6/21/2010 10:54:00 | 23.5 | 5/8/2010 12:16:01 | 26.492 |
| 5/7/2010 14:27:01 | 24.804 | 6/21/2010 11:29:00 | 23.5 | 5/8/2010 12:36:01 | 26.492 |
| 5/7/2010 14:47:01 | 24.867 | 6/21/2010 12:04:00 | 23.5 | 5/8/2010 12:56:01 | 26.492 |
| 5/7/2010 15:07:01 | 24.867 | 6/21/2010 12:39:00 | 23.5 | 5/8/2010 13:16:01 | 26.492 |
| 5/7/2010 15:27:01 | 24.929 | 6/21/2010 13:14:00 | 23.5 | 5/8/2010 13:36:01 | 26.492 |
| 5/7/2010 15:47:01 | 24.992 | 6/21/2010 13:49:00 | 23.5 | 5/8/2010 13:56:01 | 26.429 |
| 5/7/2010 16:07:01 | 24.992 | 6/21/2010 14:24:00 | 24.0 | 5/8/2010 14:16:01 | 26.429 |
| 5/7/2010 16:27:01 | 25.054 | 6/21/2010 14:59:00 | 24.0 | 5/8/2010 14:36:01 | 26.429 |
| 5/7/2010 16:47:01 | 25.054 | 6/21/2010 15:34:00 | 24.0 | 5/8/2010 14:56:01 | 26.429 |
| 5/7/2010 17:07:01 | 25.117 | 6/21/2010 16:09:00 | 24.0 | 5/8/2010 15:16:01 | 26.429 |
| 5/7/2010 17:27:01 | 25.117 | 6/21/2010 16:44:00 | 24.0 | 5/8/2010 15:36:01 | 26.429 |
| 5/7/2010 17:47:01 | 25.179 | 6/21/2010 17:19:00 | 24.0 | 5/8/2010 15:56:01 | 26.429 |
| 5/7/2010 18:07:01 | 25.179 | 6/21/2010 17:54:00 | 24.0 | 5/8/2010 16:16:01 | 26.429 |
| 5/7/2010 18:27:01 | 25.242 | 6/21/2010 18:29:00 | 24.0 | 5/8/2010 16:36:01 | 26.429 |
| 5/7/2010 18:47:01 | 25.242 | 6/21/2010 19:04:00 | 24.0 | 5/8/2010 16:56:01 | 26.429 |
| 5/7/2010 19:07:01 | 25.242 | 6/21/2010 19:39:00 | 24.0 | 5/8/2010 17:16:01 | 26.492 |
| 5/7/2010 19:27:01 | 25.304 | 6/21/2010 20:14:00 | 24.0 | 5/8/2010 17:36:01 | 26.492 |
| 5/7/2010 19:47:01 | 25.304 | 6/21/2010 20:49:00 | 24.0 | 5/8/2010 17:56:01 | 26.492 |
| 5/7/2010 20:07:01 | 25.304 | 6/21/2010 21:24:00 | 24.0 | 5/8/2010 18:16:01 | 26.492 |
| 5/7/2010 20:27:01 | 25.304 | 6/21/2010 21:59:00 | 24.0 | 5/8/2010 18:36:01 | 26.492 |
| 5/7/2010 20:47:01 | 25.304 | 6/21/2010 22:34:00 | 24.0 | 5/8/2010 18:56:01 | 26.492 |
| 5/7/2010 21:07:01 | 25.304 | 6/21/2010 23:09:00 | 24.0 | 5/8/2010 19:16:01 | 26.554 |
| 5/7/2010 21:27:01 | 25.304 | 6/21/2010 23:44:00 | 24.0 | 5/8/2010 19:36:01 | 26.554 |

|                   |                           |                        |        |
|-------------------|---------------------------|------------------------|--------|
| 5/7/2010 21:47:01 | 25.304 6/22/2010 00:19:00 | 24.0 5/8/2010 19:56:01 | 26.554 |
| 5/7/2010 22:07:01 | 25.304 6/22/2010 00:54:00 | 24.0 5/8/2010 20:16:01 | 26.554 |
| 5/7/2010 22:27:01 | 25.304 6/22/2010 01:29:00 | 24.0 5/8/2010 20:36:01 | 26.554 |
| 5/7/2010 22:47:01 | 25.242 6/22/2010 02:04:00 | 24.0 5/8/2010 20:56:01 | 26.617 |
| 5/7/2010 23:07:01 | 25.242 6/22/2010 02:39:00 | 24.0 5/8/2010 21:16:01 | 26.617 |
| 5/7/2010 23:27:01 | 25.242 6/22/2010 03:14:00 | 24.0 5/8/2010 21:36:01 | 26.617 |
| 5/7/2010 23:47:01 | 25.242 6/22/2010 03:49:00 | 24.0 5/8/2010 21:56:01 | 26.617 |
| 5/8/2010 00:07:01 | 25.179 6/22/2010 04:24:00 | 24.0 5/8/2010 22:16:01 | 26.617 |
| 5/8/2010 00:27:01 | 25.179 6/22/2010 04:59:00 | 24.0 5/8/2010 22:36:01 | 26.679 |
| 5/8/2010 00:47:01 | 25.179 6/22/2010 05:34:00 | 24.0 5/8/2010 22:56:01 | 26.679 |
| 5/8/2010 01:07:01 | 25.179 6/22/2010 06:09:00 | 24.0 5/8/2010 23:16:01 | 26.679 |
| 5/8/2010 01:27:01 | 25.117 6/22/2010 06:44:00 | 24.0 5/8/2010 23:36:01 | 26.679 |
| 5/8/2010 01:47:01 | 25.117 6/22/2010 07:19:00 | 24.0 5/8/2010 23:56:01 | 26.679 |
| 5/8/2010 02:07:01 | 25.117 6/22/2010 07:54:00 | 24.0 5/9/2010 00:16:01 | 26.679 |
| 5/8/2010 02:27:01 | 25.054 6/22/2010 08:29:00 | 24.0 5/9/2010 00:36:01 | 26.742 |
| 5/8/2010 02:47:01 | 25.054 6/22/2010 09:04:00 | 24.0 5/9/2010 00:56:01 | 26.679 |
| 5/8/2010 03:07:01 | 25.054 6/22/2010 09:39:00 | 24.0 5/9/2010 01:16:01 | 26.742 |
| 5/8/2010 03:27:01 | 24.992 6/22/2010 10:14:00 | 24.0 5/9/2010 01:36:01 | 26.679 |
| 5/8/2010 03:47:01 | 24.992 6/22/2010 10:49:00 | 24.0 5/9/2010 01:56:01 | 26.679 |
| 5/8/2010 04:07:01 | 24.929 6/22/2010 11:24:00 | 24.0 5/9/2010 02:16:01 | 26.679 |
| 5/8/2010 04:27:01 | 24.929 6/22/2010 11:59:00 | 24.0 5/9/2010 02:36:01 | 26.679 |
| 5/8/2010 04:47:01 | 24.929 6/22/2010 12:34:00 | 24.0 5/9/2010 02:56:01 | 26.679 |
| 5/8/2010 05:07:01 | 24.867 6/22/2010 13:09:00 | 24.0 5/9/2010 03:16:01 | 26.679 |
| 5/8/2010 05:27:01 | 24.867 6/22/2010 13:44:00 | 24.0 5/9/2010 03:36:01 | 26.679 |
| 5/8/2010 05:47:01 | 24.804 6/22/2010 14:19:00 | 24.0 5/9/2010 03:56:01 | 26.679 |
| 5/8/2010 06:07:01 | 24.804 6/22/2010 14:54:00 | 24.0 5/9/2010 04:16:01 | 26.679 |
| 5/8/2010 06:27:01 | 24.742 6/22/2010 15:29:00 | 24.0 5/9/2010 04:36:01 | 26.617 |
| 5/8/2010 06:47:01 | 24.742 6/22/2010 16:04:00 | 24.0 5/9/2010 04:56:01 | 26.617 |
| 5/8/2010 07:07:01 | 24.742 6/22/2010 16:39:00 | 24.0 5/9/2010 05:16:01 | 26.617 |
| 5/8/2010 07:27:01 | 24.679 6/22/2010 17:14:00 | 24.0 5/9/2010 05:36:01 | 26.617 |
| 5/8/2010 07:47:01 | 24.679 6/22/2010 17:49:00 | 24.0 5/9/2010 05:56:01 | 26.617 |
| 5/8/2010 08:07:01 | 24.617 6/22/2010 18:24:00 | 24.0 5/9/2010 06:16:01 | 26.617 |
| 5/8/2010 08:27:01 | 24.617 6/22/2010 18:59:00 | 24.0 5/9/2010 06:36:01 | 26.554 |
| 5/8/2010 08:47:01 | 24.554 6/22/2010 19:34:00 | 24.5 5/9/2010 06:56:01 | 26.554 |
| 5/8/2010 09:07:01 | 24.554 6/22/2010 20:09:00 | 24.5 5/9/2010 07:16:01 | 26.554 |
| 5/8/2010 09:27:01 | 24.492 6/22/2010 20:44:00 | 24.5 5/9/2010 07:36:01 | 26.554 |
| 5/8/2010 09:47:01 | 24.492 6/22/2010 21:19:00 | 24.5 5/9/2010 07:56:01 | 26.554 |
| 5/8/2010 10:07:01 | 24.429 6/22/2010 21:54:00 | 24.5 5/9/2010 08:16:01 | 26.492 |
| 5/8/2010 10:27:01 | 24.429 6/22/2010 22:29:00 | 24.5 5/9/2010 08:36:01 | 26.492 |
| 5/8/2010 10:47:01 | 24.429 6/22/2010 23:04:00 | 24.5 5/9/2010 08:56:01 | 26.492 |
| 5/8/2010 11:07:01 | 24.367 6/22/2010 23:39:00 | 24.5 5/9/2010 09:16:01 | 26.492 |
| 5/8/2010 11:27:01 | 24.367 6/23/2010 00:14:00 | 24.5 5/9/2010 09:36:01 | 26.429 |
| 5/8/2010 11:47:01 | 24.367 6/23/2010 00:49:00 | 24.5 5/9/2010 09:56:01 | 26.429 |
| 5/8/2010 12:07:01 | 24.367 6/23/2010 01:24:00 | 24.5 5/9/2010 10:16:01 | 26.429 |
| 5/8/2010 12:27:01 | 24.367 6/23/2010 01:59:00 | 24.5 5/9/2010 10:36:01 | 26.429 |
| 5/8/2010 12:47:01 | 24.367 6/23/2010 02:34:00 | 24.5 5/9/2010 10:56:01 | 26.367 |
| 5/8/2010 13:07:01 | 24.429 6/23/2010 03:09:00 | 24.5 5/9/2010 11:16:01 | 26.367 |
| 5/8/2010 13:27:01 | 24.429 6/23/2010 03:44:00 | 24.5 5/9/2010 11:36:01 | 26.367 |
| 5/8/2010 13:47:01 | 24.429 6/23/2010 04:19:00 | 24.0 5/9/2010 11:56:01 | 26.367 |
| 5/8/2010 14:07:01 | 24.429 6/23/2010 04:54:00 | 24.0 5/9/2010 12:16:01 | 26.367 |

|                   |        |                    |      |                    |        |
|-------------------|--------|--------------------|------|--------------------|--------|
| 5/8/2010 14:27:01 | 24.492 | 6/23/2010 05:29:00 | 24.0 | 5/9/2010 12:36:01  | 26.367 |
| 5/8/2010 14:47:01 | 24.492 | 6/23/2010 06:04:00 | 24.0 | 5/9/2010 12:56:01  | 26.304 |
| 5/8/2010 15:07:01 | 24.554 | 6/23/2010 06:39:00 | 24.0 | 5/9/2010 13:16:01  | 26.304 |
| 5/8/2010 15:27:01 | 24.554 | 6/23/2010 07:14:00 | 24.0 | 5/9/2010 13:36:01  | 26.304 |
| 5/8/2010 15:47:01 | 24.617 | 6/23/2010 07:49:00 | 24.0 | 5/9/2010 13:56:01  | 26.304 |
| 5/8/2010 16:07:01 | 24.679 | 6/23/2010 08:24:00 | 24.0 | 5/9/2010 14:16:01  | 26.304 |
| 5/8/2010 16:27:01 | 24.679 | 6/23/2010 08:59:00 | 24.0 | 5/9/2010 14:36:01  | 26.304 |
| 5/8/2010 16:47:01 | 24.742 | 6/23/2010 09:34:00 | 24.0 | 5/9/2010 14:56:01  | 26.304 |
| 5/8/2010 17:07:01 | 24.742 | 6/23/2010 10:09:00 | 24.0 | 5/9/2010 15:16:01  | 26.304 |
| 5/8/2010 17:27:01 | 24.804 | 6/23/2010 10:44:00 | 24.0 | 5/9/2010 15:36:01  | 26.304 |
| 5/8/2010 17:47:01 | 24.804 | 6/23/2010 11:19:00 | 24.0 | 5/9/2010 15:56:01  | 26.304 |
| 5/8/2010 18:07:01 | 24.867 | 6/23/2010 11:54:00 | 24.0 | 5/9/2010 16:16:01  | 26.304 |
| 5/8/2010 18:27:01 | 24.867 | 6/23/2010 12:29:00 | 24.0 | 5/9/2010 16:36:01  | 26.304 |
| 5/8/2010 18:47:01 | 24.929 | 6/23/2010 13:04:00 | 24.0 | 5/9/2010 16:56:01  | 26.304 |
| 5/8/2010 19:07:01 | 24.929 | 6/23/2010 13:39:00 | 24.0 | 5/9/2010 17:16:01  | 26.367 |
| 5/8/2010 19:27:01 | 24.929 | 6/23/2010 14:14:00 | 24.0 | 5/9/2010 17:36:01  | 26.367 |
| 5/8/2010 19:47:01 | 24.929 | 6/23/2010 14:49:00 | 24.0 | 5/9/2010 17:56:01  | 26.367 |
| 5/8/2010 20:07:01 | 24.992 | 6/23/2010 15:24:00 | 24.0 | 5/9/2010 18:16:01  | 26.367 |
| 5/8/2010 20:27:01 | 24.992 | 6/23/2010 15:59:00 | 24.5 | 5/9/2010 18:36:01  | 26.367 |
| 5/8/2010 20:47:01 | 24.992 | 6/23/2010 16:34:00 | 24.5 | 5/9/2010 18:56:01  | 26.429 |
| 5/8/2010 21:07:01 | 24.992 | 6/23/2010 17:09:00 | 24.5 | 5/9/2010 19:16:01  | 26.429 |
| 5/8/2010 21:27:01 | 24.992 | 6/23/2010 17:44:00 | 24.5 | 5/9/2010 19:36:01  | 26.429 |
| 5/8/2010 21:47:01 | 24.992 | 6/23/2010 18:19:00 | 24.5 | 5/9/2010 19:56:01  | 26.429 |
| 5/8/2010 22:07:01 | 24.992 | 6/23/2010 18:54:00 | 24.5 | 5/9/2010 20:16:01  | 26.492 |
| 5/8/2010 22:27:01 | 24.929 | 6/23/2010 19:29:00 | 24.5 | 5/9/2010 20:36:01  | 26.492 |
| 5/8/2010 22:47:01 | 24.929 | 6/23/2010 20:04:00 | 24.5 | 5/9/2010 20:56:01  | 26.492 |
| 5/8/2010 23:07:01 | 24.929 | 6/23/2010 20:39:00 | 24.5 | 5/9/2010 21:16:01  | 26.554 |
| 5/8/2010 23:27:01 | 24.929 | 6/23/2010 21:14:00 | 24.5 | 5/9/2010 21:36:01  | 26.554 |
| 5/8/2010 23:47:01 | 24.929 | 6/23/2010 21:49:00 | 24.5 | 5/9/2010 21:56:01  | 26.554 |
| 5/9/2010 00:07:01 | 24.867 | 6/23/2010 22:24:00 | 24.5 | 5/9/2010 22:16:01  | 26.554 |
| 5/9/2010 00:27:01 | 24.867 | 6/23/2010 22:59:00 | 24.5 | 5/9/2010 22:36:01  | 26.617 |
| 5/9/2010 00:47:01 | 24.867 | 6/23/2010 23:34:00 | 24.5 | 5/9/2010 22:56:01  | 26.617 |
| 5/9/2010 01:07:01 | 24.804 | 6/24/2010 00:09:00 | 24.5 | 5/9/2010 23:16:01  | 26.617 |
| 5/9/2010 01:27:01 | 24.804 | 6/24/2010 00:44:00 | 24.5 | 5/9/2010 23:36:01  | 26.617 |
| 5/9/2010 01:47:01 | 24.804 | 6/24/2010 01:19:00 | 24.5 | 5/9/2010 23:56:01  | 26.617 |
| 5/9/2010 02:07:01 | 24.742 | 6/24/2010 01:54:00 | 24.5 | 5/10/2010 00:16:01 | 26.617 |
| 5/9/2010 02:27:01 | 24.742 | 6/24/2010 02:29:00 | 24.5 | 5/10/2010 00:36:01 | 26.617 |
| 5/9/2010 02:47:01 | 24.742 | 6/24/2010 03:04:00 | 24.5 | 5/10/2010 00:56:01 | 26.679 |
| 5/9/2010 03:07:01 | 24.679 | 6/24/2010 03:39:00 | 24.0 | 5/10/2010 01:16:01 | 26.679 |
| 5/9/2010 03:27:01 | 24.679 | 6/24/2010 04:14:00 | 24.0 | 5/10/2010 01:36:01 | 26.679 |
| 5/9/2010 03:47:01 | 24.617 | 6/24/2010 04:49:00 | 24.0 | 5/10/2010 01:56:01 | 26.679 |
| 5/9/2010 04:07:01 | 24.617 | 6/24/2010 05:24:00 | 24.0 | 5/10/2010 02:16:01 | 26.679 |
| 5/9/2010 04:27:01 | 24.617 | 6/24/2010 05:59:00 | 24.0 | 5/10/2010 02:36:01 | 26.679 |
| 5/9/2010 04:47:01 | 24.554 | 6/24/2010 06:34:00 | 24.0 | 5/10/2010 02:56:01 | 26.679 |
| 5/9/2010 05:07:01 | 24.554 | 6/24/2010 07:09:00 | 24.0 | 5/10/2010 03:16:01 | 26.679 |
| 5/9/2010 05:27:01 | 24.554 | 6/24/2010 07:44:00 | 24.0 | 5/10/2010 03:36:01 | 26.679 |
| 5/9/2010 05:47:01 | 24.492 | 6/24/2010 08:19:00 | 24.0 | 5/10/2010 03:56:01 | 26.679 |
| 5/9/2010 06:07:01 | 24.492 | 6/24/2010 08:54:00 | 24.0 | 5/10/2010 04:16:01 | 26.679 |
| 5/9/2010 06:27:01 | 24.492 | 6/24/2010 09:29:00 | 24.0 | 5/10/2010 04:36:01 | 26.679 |
| 5/9/2010 06:47:01 | 24.429 | 6/24/2010 10:04:00 | 24.0 | 5/10/2010 04:56:01 | 26.679 |

|                   |        |                    |      |                    |        |
|-------------------|--------|--------------------|------|--------------------|--------|
| 5/9/2010 07:07:01 | 24.429 | 6/24/2010 10:39:00 | 24.0 | 5/10/2010 05:16:01 | 26.679 |
| 5/9/2010 07:27:01 | 24.429 | 6/24/2010 11:14:00 | 24.0 | 5/10/2010 05:36:01 | 26.679 |
| 5/9/2010 07:47:01 | 24.367 | 6/24/2010 11:49:00 | 24.0 | 5/10/2010 05:56:01 | 26.679 |
| 5/9/2010 08:07:01 | 24.367 | 6/24/2010 12:24:00 | 24.0 | 5/10/2010 06:16:01 | 26.679 |
| 5/9/2010 08:27:01 | 24.304 | 6/24/2010 12:59:00 | 24.0 | 5/10/2010 06:36:01 | 26.617 |
| 5/9/2010 08:47:01 | 24.304 | 6/24/2010 13:34:00 | 24.0 | 5/10/2010 06:56:01 | 26.617 |
| 5/9/2010 09:07:01 | 24.304 | 6/24/2010 14:09:00 | 24.0 | 5/10/2010 07:16:01 | 26.617 |
| 5/9/2010 09:27:01 | 24.242 | 6/24/2010 14:44:00 | 24.0 | 5/10/2010 07:36:01 | 26.617 |
| 5/9/2010 09:47:01 | 24.242 | 6/24/2010 15:19:00 | 24.0 | 5/10/2010 07:56:01 | 26.617 |
| 5/9/2010 10:07:01 | 24.242 | 6/24/2010 15:54:00 | 24.0 | 5/10/2010 08:16:01 | 26.617 |
| 5/9/2010 10:27:01 | 24.242 | 6/24/2010 16:29:00 | 24.0 | 5/10/2010 08:36:01 | 26.617 |
| 5/9/2010 10:47:01 | 24.242 | 6/24/2010 17:04:00 | 24.0 | 5/10/2010 08:56:01 | 26.554 |
| 5/9/2010 11:07:01 | 24.242 | 6/24/2010 17:39:00 | 24.0 | 5/10/2010 09:16:01 | 26.554 |
| 5/9/2010 11:27:01 | 24.179 | 6/24/2010 18:14:00 | 24.0 | 5/10/2010 09:36:01 | 26.554 |
| 5/9/2010 11:47:01 | 24.179 | 6/24/2010 18:49:00 | 24.5 | 5/10/2010 09:56:01 | 26.554 |
| 5/9/2010 12:07:01 | 24.242 | 6/24/2010 19:24:00 | 24.5 | 5/10/2010 10:16:01 | 26.554 |
| 5/9/2010 12:27:01 | 24.242 | 6/24/2010 19:59:00 | 24.5 | 5/10/2010 10:36:01 | 26.492 |
| 5/9/2010 12:47:01 | 24.242 | 6/24/2010 20:34:00 | 24.5 | 5/10/2010 10:56:01 | 26.492 |
| 5/9/2010 13:07:01 | 24.242 | 6/24/2010 21:09:00 | 24.5 | 5/10/2010 11:16:01 | 26.492 |
| 5/9/2010 13:27:01 | 24.304 | 6/24/2010 21:44:00 | 24.5 | 5/10/2010 11:36:01 | 26.492 |
| 5/9/2010 13:47:01 | 24.304 | 6/24/2010 22:19:00 | 24.5 | 5/10/2010 11:56:01 | 26.492 |
| 5/9/2010 14:07:01 | 24.367 | 6/24/2010 22:54:00 | 24.5 | 5/10/2010 12:16:01 | 26.429 |
| 5/9/2010 14:27:01 | 24.367 | 6/24/2010 23:29:00 | 24.0 | 5/10/2010 12:36:01 | 26.429 |
| 5/9/2010 14:47:01 | 24.429 | 6/25/2010 00:04:00 | 24.0 | 5/10/2010 12:56:01 | 26.429 |
| 5/9/2010 15:07:01 | 24.429 | 6/25/2010 00:39:00 | 24.0 | 5/10/2010 13:16:01 | 26.429 |
| 5/9/2010 15:27:01 | 24.492 | 6/25/2010 01:14:00 | 24.0 | 5/10/2010 13:36:01 | 26.429 |
| 5/9/2010 15:47:01 | 24.554 | 6/25/2010 01:49:00 | 24.0 | 5/10/2010 13:56:01 | 26.429 |
| 5/9/2010 16:07:01 | 24.554 | 6/25/2010 02:24:00 | 24.0 | 5/10/2010 14:16:01 | 26.429 |
| 5/9/2010 16:27:01 | 24.617 | 6/25/2010 02:59:00 | 24.0 | 5/10/2010 14:36:01 | 26.429 |
| 5/9/2010 16:47:01 | 24.679 | 6/25/2010 03:34:00 | 24.0 | 5/10/2010 14:56:01 | 26.429 |
| 5/9/2010 17:07:01 | 24.679 | 6/25/2010 04:09:00 | 24.0 | 5/10/2010 15:16:01 | 26.429 |
| 5/9/2010 17:27:01 | 24.742 | 6/25/2010 04:44:00 | 24.0 | 5/10/2010 15:36:01 | 26.429 |
| 5/9/2010 17:47:01 | 24.742 | 6/25/2010 05:19:00 | 24.0 | 5/10/2010 15:56:01 | 26.429 |
| 5/9/2010 18:07:01 | 24.804 | 6/25/2010 05:54:00 | 24.0 | 5/10/2010 16:16:01 | 26.429 |
| 5/9/2010 18:27:01 | 24.804 | 6/25/2010 06:29:00 | 23.5 | 5/10/2010 16:36:01 | 26.429 |
| 5/9/2010 18:47:01 | 24.867 | 6/25/2010 07:04:00 | 23.5 | 5/10/2010 16:56:01 | 26.429 |
| 5/9/2010 19:07:01 | 24.867 | 6/25/2010 07:39:00 | 23.5 | 5/10/2010 17:16:01 | 26.429 |
| 5/9/2010 19:27:01 | 24.867 | 6/25/2010 08:14:00 | 23.5 | 5/10/2010 17:36:01 | 26.492 |
| 5/9/2010 19:47:01 | 24.929 | 6/25/2010 08:49:00 | 23.5 | 5/10/2010 17:56:01 | 26.492 |
| 5/9/2010 20:07:01 | 24.929 | 6/25/2010 09:24:00 | 23.5 | 5/10/2010 18:16:01 | 26.492 |
| 5/9/2010 20:27:01 | 24.929 | 6/25/2010 09:59:00 | 23.5 | 5/10/2010 18:36:01 | 26.492 |
| 5/9/2010 20:47:01 | 24.929 | 6/25/2010 10:34:00 | 23.5 | 5/10/2010 18:56:01 | 26.492 |
| 5/9/2010 21:07:01 | 24.992 | 6/25/2010 11:09:00 | 23.5 | 5/10/2010 19:16:01 | 26.554 |
| 5/9/2010 21:27:01 | 24.992 | 6/25/2010 11:44:00 | 23.5 | 5/10/2010 19:36:01 | 26.554 |
| 5/9/2010 21:47:01 | 24.992 | 6/25/2010 12:19:00 | 23.5 | 5/10/2010 19:56:01 | 26.554 |
| 5/9/2010 22:07:01 | 24.992 | 6/25/2010 12:54:00 | 23.5 | 5/10/2010 20:16:01 | 26.617 |
| 5/9/2010 22:27:01 | 24.992 | 6/25/2010 13:29:00 | 23.5 | 5/10/2010 20:36:01 | 26.617 |
| 5/9/2010 22:47:01 | 24.992 | 6/25/2010 14:04:00 | 23.5 | 5/10/2010 20:56:01 | 26.617 |
| 5/9/2010 23:07:01 | 24.992 | 6/25/2010 14:39:00 | 23.5 | 5/10/2010 21:16:01 | 26.617 |
| 5/9/2010 23:27:01 | 24.992 | 6/25/2010 15:14:00 | 23.5 | 5/10/2010 21:36:01 | 26.679 |

|                    |        |                    |      |                    |        |
|--------------------|--------|--------------------|------|--------------------|--------|
| 5/9/2010 23:47:01  | 24.929 | 6/25/2010 15:49:00 | 23.5 | 5/10/2010 21:56:01 | 26.679 |
| 5/10/2010 00:07:01 | 24.929 | 6/25/2010 16:24:00 | 23.5 | 5/10/2010 22:16:01 | 26.679 |
| 5/10/2010 00:27:01 | 24.929 | 6/25/2010 16:59:00 | 23.5 | 5/10/2010 22:36:01 | 26.679 |
| 5/10/2010 00:47:01 | 24.929 | 6/25/2010 17:34:00 | 23.5 | 5/10/2010 22:56:01 | 26.679 |
| 5/10/2010 01:07:01 | 24.929 | 6/25/2010 18:09:00 | 23.5 | 5/10/2010 23:16:01 | 26.742 |
| 5/10/2010 01:27:01 | 24.929 | 6/25/2010 18:44:00 | 24.0 | 5/10/2010 23:36:01 | 26.742 |
| 5/10/2010 01:47:01 | 24.929 | 6/25/2010 19:19:00 | 24.0 | 5/10/2010 23:56:01 | 26.742 |
| 5/10/2010 02:07:01 | 24.929 | 6/25/2010 19:54:00 | 24.0 | 5/11/2010 00:16:01 | 26.742 |
| 5/10/2010 02:27:01 | 24.867 | 6/25/2010 20:29:00 | 24.0 | 5/11/2010 00:36:01 | 26.742 |
| 5/10/2010 02:47:01 | 24.867 | 6/25/2010 21:04:00 | 24.0 | 5/11/2010 00:56:01 | 26.742 |
| 5/10/2010 03:07:01 | 24.867 | 6/25/2010 21:39:00 | 24.0 | 5/11/2010 01:16:01 | 26.742 |
| 5/10/2010 03:27:01 | 24.867 | 6/25/2010 22:14:00 | 24.0 | 5/11/2010 01:36:01 | 26.742 |
| 5/10/2010 03:47:01 | 24.804 | 6/25/2010 22:49:00 | 24.0 | 5/11/2010 01:56:01 | 26.742 |
| 5/10/2010 04:07:01 | 24.804 | 6/25/2010 23:24:00 | 24.0 | 5/11/2010 02:16:01 | 26.804 |
| 5/10/2010 04:27:01 | 24.804 | 6/25/2010 23:59:00 | 24.0 | 5/11/2010 02:36:01 | 26.742 |
| 5/10/2010 04:47:01 | 24.804 | 6/26/2010 00:34:00 | 24.0 | 5/11/2010 02:56:01 | 26.804 |
| 5/10/2010 05:07:01 | 24.742 | 6/26/2010 01:09:00 | 23.5 | 5/11/2010 03:16:01 | 26.804 |
| 5/10/2010 05:27:01 | 24.742 | 6/26/2010 01:44:00 | 24.0 | 5/11/2010 03:36:01 | 26.742 |
| 5/10/2010 05:47:01 | 24.742 | 6/26/2010 02:19:00 | 23.5 | 5/11/2010 03:56:01 | 26.742 |
| 5/10/2010 06:07:01 | 24.742 | 6/26/2010 02:54:00 | 23.5 | 5/11/2010 04:16:01 | 26.742 |
| 5/10/2010 06:27:01 | 24.679 | 6/26/2010 03:29:00 | 23.5 | 5/11/2010 04:36:01 | 26.742 |
| 5/10/2010 06:47:01 | 24.679 | 6/26/2010 04:04:00 | 23.5 | 5/11/2010 04:56:01 | 26.742 |
| 5/10/2010 07:07:01 | 24.679 | 6/26/2010 04:39:00 | 23.5 | 5/11/2010 05:16:01 | 26.742 |
| 5/10/2010 07:27:01 | 24.617 | 6/26/2010 05:14:00 | 23.5 | 5/11/2010 05:36:01 | 26.742 |
| 5/10/2010 07:47:01 | 24.617 | 6/26/2010 05:49:00 | 23.5 | 5/11/2010 05:56:01 | 26.742 |
| 5/10/2010 08:07:01 | 24.617 | 6/26/2010 06:24:00 | 23.5 | 5/11/2010 06:16:01 | 26.742 |
| 5/10/2010 08:27:01 | 24.554 | 6/26/2010 06:59:00 | 23.5 | 5/11/2010 06:36:01 | 26.742 |
| 5/10/2010 08:47:01 | 24.554 | 6/26/2010 07:34:00 | 23.5 | 5/11/2010 06:56:01 | 26.679 |
| 5/10/2010 09:07:01 | 24.554 | 6/26/2010 08:09:00 | 23.5 | 5/11/2010 07:16:01 | 26.679 |
| 5/10/2010 09:27:01 | 24.492 | 6/26/2010 08:44:00 | 23.5 | 5/11/2010 07:36:01 | 26.679 |
| 5/10/2010 09:47:01 | 24.492 | 6/26/2010 09:19:00 | 23.5 | 5/11/2010 07:56:01 | 26.679 |
| 5/10/2010 10:07:01 | 24.492 | 6/26/2010 09:54:00 | 23.5 | 5/11/2010 08:16:01 | 26.679 |
| 5/10/2010 10:27:01 | 24.492 | 6/26/2010 10:29:00 | 23.5 | 5/11/2010 08:36:01 | 26.617 |
| 5/10/2010 10:47:01 | 24.492 | 6/26/2010 11:04:00 | 23.5 | 5/11/2010 08:56:01 | 26.617 |
| 5/10/2010 11:07:01 | 24.429 | 6/26/2010 11:39:00 | 23.5 | 5/11/2010 09:16:01 | 26.617 |
| 5/10/2010 11:27:01 | 24.429 | 6/26/2010 12:14:00 | 23.5 | 5/11/2010 09:36:01 | 26.617 |
| 5/10/2010 11:47:01 | 24.429 | 6/26/2010 12:49:00 | 23.5 | 5/11/2010 09:56:01 | 26.554 |
| 5/10/2010 12:07:01 | 24.429 | 6/26/2010 13:24:00 | 23.5 | 5/11/2010 10:16:01 | 26.554 |
| 5/10/2010 12:27:01 | 24.429 | 6/26/2010 13:59:00 | 23.5 | 5/11/2010 10:36:01 | 26.554 |
| 5/10/2010 12:47:01 | 24.492 | 6/26/2010 14:34:00 | 23.5 | 5/11/2010 10:56:01 | 26.554 |
| 5/10/2010 13:07:01 | 24.492 | 6/26/2010 15:09:00 | 23.5 | 5/11/2010 11:16:01 | 26.492 |
| 5/10/2010 13:27:01 | 24.492 | 6/26/2010 15:44:00 | 23.5 | 5/11/2010 11:36:01 | 26.492 |
| 5/10/2010 13:47:01 | 24.554 | 6/26/2010 16:19:00 | 23.5 | 5/11/2010 11:56:01 | 26.492 |
| 5/10/2010 14:07:01 | 24.554 | 6/26/2010 16:54:00 | 23.5 | 5/11/2010 12:16:01 | 26.492 |
| 5/10/2010 14:27:01 | 24.617 | 6/26/2010 17:29:00 | 24.0 | 5/11/2010 12:36:01 | 26.429 |
| 5/10/2010 14:47:01 | 24.617 | 6/26/2010 18:04:00 | 24.0 | 5/11/2010 12:56:01 | 26.429 |
| 5/10/2010 15:07:01 | 24.679 | 6/26/2010 18:39:00 | 24.0 | 5/11/2010 13:16:01 | 26.429 |
| 5/10/2010 15:27:01 | 24.679 | 6/26/2010 19:14:00 | 24.0 | 5/11/2010 13:36:01 | 26.429 |
| 5/10/2010 15:47:01 | 24.742 | 6/26/2010 19:49:00 | 24.0 | 5/11/2010 13:56:01 | 26.429 |
| 5/10/2010 16:07:01 | 24.804 | 6/26/2010 20:24:00 | 24.0 | 5/11/2010 14:16:01 | 26.429 |

|                    |        |                    |      |                    |        |
|--------------------|--------|--------------------|------|--------------------|--------|
| 5/10/2010 16:27:01 | 24.804 | 6/26/2010 20:59:00 | 24.0 | 5/11/2010 14:36:01 | 26.429 |
| 5/10/2010 16:47:01 | 24.867 | 6/26/2010 21:34:00 | 24.0 | 5/11/2010 14:56:01 | 26.429 |
| 5/10/2010 17:07:01 | 24.867 | 6/26/2010 22:09:00 | 24.0 | 5/11/2010 15:16:01 | 26.429 |
| 5/10/2010 17:27:01 | 24.929 | 6/26/2010 22:44:00 | 24.0 | 5/11/2010 15:36:01 | 26.429 |
| 5/10/2010 17:47:01 | 24.992 | 6/26/2010 23:19:00 | 24.0 | 5/11/2010 15:56:01 | 26.429 |
| 5/10/2010 18:07:01 | 24.992 | 6/26/2010 23:54:00 | 24.0 | 5/11/2010 16:16:01 | 26.429 |
| 5/10/2010 18:27:01 | 24.992 | 6/27/2010 00:29:00 | 24.0 | 5/11/2010 16:36:01 | 26.429 |
| 5/10/2010 18:47:01 | 25.054 | 6/27/2010 01:04:00 | 24.0 | 5/11/2010 16:56:01 | 26.429 |
| 5/10/2010 19:07:01 | 25.054 | 6/27/2010 01:39:00 | 24.0 | 5/11/2010 17:16:01 | 26.429 |
| 5/10/2010 19:27:01 | 25.054 | 6/27/2010 02:14:00 | 24.0 | 5/11/2010 17:36:01 | 26.429 |
| 5/10/2010 19:47:01 | 25.117 | 6/27/2010 02:49:00 | 24.0 | 5/11/2010 17:56:01 | 26.429 |
| 5/10/2010 20:07:01 | 25.117 | 6/27/2010 03:24:00 | 24.0 | 5/11/2010 18:16:01 | 26.492 |
| 5/10/2010 20:27:01 | 25.117 | 6/27/2010 03:59:00 | 24.0 | 5/11/2010 18:36:01 | 26.492 |
| 5/10/2010 20:47:01 | 25.117 | 6/27/2010 04:34:00 | 24.0 | 5/11/2010 18:56:01 | 26.492 |
| 5/10/2010 21:07:01 | 25.117 | 6/27/2010 05:09:00 | 24.0 | 5/11/2010 19:16:01 | 26.492 |
| 5/10/2010 21:27:01 | 25.179 | 6/27/2010 05:44:00 | 24.0 | 5/11/2010 19:36:01 | 26.492 |
| 5/10/2010 21:47:01 | 25.117 | 6/27/2010 06:19:00 | 24.0 | 5/11/2010 19:56:01 | 26.554 |
| 5/10/2010 22:07:01 | 25.117 | 6/27/2010 06:54:00 | 24.0 | 5/11/2010 20:16:01 | 26.554 |
| 5/10/2010 22:27:01 | 25.117 | 6/27/2010 07:29:00 | 24.0 | 5/11/2010 20:36:01 | 26.554 |
| 5/10/2010 22:47:01 | 25.117 | 6/27/2010 08:04:00 | 24.0 | 5/11/2010 20:56:01 | 26.554 |
| 5/10/2010 23:07:01 | 25.117 | 6/27/2010 08:39:00 | 24.0 | 5/11/2010 21:16:01 | 26.554 |
| 5/10/2010 23:27:01 | 25.117 | 6/27/2010 09:14:00 | 24.0 | 5/11/2010 21:36:01 | 26.617 |
| 5/10/2010 23:47:01 | 25.117 | 6/27/2010 09:49:00 | 24.0 | 5/11/2010 21:56:01 | 26.617 |
| 5/11/2010 00:07:01 | 25.117 | 6/27/2010 10:24:00 | 24.0 | 5/11/2010 22:16:01 | 26.617 |
| 5/11/2010 00:27:01 | 25.117 | 6/27/2010 10:59:00 | 24.0 | 5/11/2010 22:36:01 | 26.617 |
| 5/11/2010 00:47:01 | 25.117 | 6/27/2010 11:34:00 | 24.0 | 5/11/2010 22:56:01 | 26.617 |
| 5/11/2010 01:07:01 | 25.117 | 6/27/2010 12:09:00 | 24.0 | 5/11/2010 23:16:01 | 26.617 |
| 5/11/2010 01:27:01 | 25.117 | 6/27/2010 12:44:00 | 24.0 | 5/11/2010 23:36:01 | 26.617 |
| 5/11/2010 01:47:01 | 25.054 | 6/27/2010 13:19:00 | 24.0 | 5/11/2010 23:56:01 | 26.679 |
| 5/11/2010 02:07:01 | 25.054 | 6/27/2010 13:54:00 | 24.0 | 5/12/2010 00:16:01 | 26.679 |
| 5/11/2010 02:27:01 | 25.054 | 6/27/2010 14:29:00 | 24.0 | 5/12/2010 00:36:01 | 26.679 |
| 5/11/2010 02:47:01 | 25.054 | 6/27/2010 15:04:00 | 24.0 | 5/12/2010 00:56:01 | 26.679 |
| 5/11/2010 03:07:01 | 24.992 | 6/27/2010 15:39:00 | 24.0 | 5/12/2010 01:16:01 | 26.679 |
| 5/11/2010 03:27:01 | 24.992 | 6/27/2010 16:14:00 | 24.5 | 5/12/2010 01:36:01 | 26.679 |
| 5/11/2010 03:47:01 | 24.992 | 6/27/2010 16:49:00 | 24.5 | 5/12/2010 01:56:01 | 26.679 |
| 5/11/2010 04:07:01 | 24.929 | 6/27/2010 17:24:00 | 24.5 | 5/12/2010 02:16:01 | 26.679 |
| 5/11/2010 04:27:01 | 24.929 | 6/27/2010 17:59:00 | 24.5 | 5/12/2010 02:36:01 | 26.679 |
| 5/11/2010 04:47:01 | 24.929 | 6/27/2010 18:34:00 | 24.5 | 5/12/2010 02:56:01 | 26.679 |
| 5/11/2010 05:07:01 | 24.867 | 6/27/2010 19:09:00 | 24.5 | 5/12/2010 03:16:01 | 26.617 |
| 5/11/2010 05:27:01 | 24.867 | 6/27/2010 19:44:00 | 24.5 | 5/12/2010 03:36:01 | 26.617 |
| 5/11/2010 05:47:01 | 24.804 | 6/27/2010 20:19:00 | 24.5 | 5/12/2010 03:56:01 | 26.617 |
| 5/11/2010 06:07:01 | 24.804 | 6/27/2010 20:54:00 | 24.5 | 5/12/2010 04:16:01 | 26.617 |
| 5/11/2010 06:27:01 | 24.742 | 6/27/2010 21:29:00 | 24.5 | 5/12/2010 04:36:01 | 26.617 |
| 5/11/2010 06:47:01 | 24.742 | 6/27/2010 22:04:00 | 24.5 | 5/12/2010 04:56:01 | 26.617 |
| 5/11/2010 07:07:01 | 24.679 | 6/27/2010 22:39:00 | 24.5 | 5/12/2010 05:16:01 | 26.617 |
| 5/11/2010 07:27:01 | 24.679 | 6/27/2010 23:14:00 | 24.5 | 5/12/2010 05:36:01 | 26.617 |
| 5/11/2010 07:47:01 | 24.617 | 6/27/2010 23:49:00 | 24.5 | 5/12/2010 05:56:01 | 26.617 |
| 5/11/2010 08:07:01 | 24.617 | 6/28/2010 00:24:00 | 24.5 | 5/12/2010 06:16:01 | 26.617 |
| 5/11/2010 08:27:01 | 24.554 | 6/28/2010 00:59:00 | 24.5 | 5/12/2010 06:36:01 | 26.554 |
| 5/11/2010 08:47:01 | 24.554 | 6/28/2010 01:34:00 | 24.5 | 5/12/2010 06:56:01 | 26.554 |



|                    |        |                    |      |                    |        |
|--------------------|--------|--------------------|------|--------------------|--------|
| 5/11/2010 09:07:01 | 24.492 | 6/28/2010 02:09:00 | 24.5 | 5/12/2010 07:16:01 | 26.554 |
| 5/11/2010 09:27:01 | 24.492 | 6/28/2010 02:44:00 | 24.5 | 5/12/2010 07:36:01 | 26.554 |
| 5/11/2010 09:47:01 | 24.429 | 6/28/2010 03:19:00 | 24.5 | 5/12/2010 07:56:01 | 26.554 |
| 5/11/2010 10:07:01 | 24.429 | 6/28/2010 03:54:00 | 24.5 | 5/12/2010 08:16:01 | 26.492 |
| 5/11/2010 10:27:01 | 24.429 | 6/28/2010 04:29:00 | 24.0 | 5/12/2010 08:36:01 | 26.492 |
| 5/11/2010 10:47:01 | 24.367 | 6/28/2010 05:04:00 | 24.0 | 5/12/2010 08:56:01 | 26.492 |
| 5/11/2010 11:07:01 | 24.367 | 6/28/2010 05:39:00 | 24.0 | 5/12/2010 09:16:01 | 26.492 |
| 5/11/2010 11:27:01 | 24.367 | 6/28/2010 06:14:00 | 24.0 | 5/12/2010 09:36:01 | 26.429 |
| 5/11/2010 11:47:01 | 24.367 | 6/28/2010 06:49:00 | 24.0 | 5/12/2010 09:56:01 | 26.429 |
| 5/11/2010 12:07:01 | 24.367 | 6/28/2010 07:24:00 | 24.0 | 5/12/2010 10:16:01 | 26.429 |
| 5/11/2010 12:27:01 | 24.367 | 6/28/2010 07:59:00 | 24.0 | 5/12/2010 10:36:01 | 26.429 |
| 5/11/2010 12:47:01 | 24.367 | 6/28/2010 08:34:00 | 24.0 | 5/12/2010 10:56:01 | 26.429 |
| 5/11/2010 13:07:01 | 24.367 | 6/28/2010 09:09:00 | 24.0 | 5/12/2010 11:16:01 | 26.367 |
| 5/11/2010 13:27:01 | 24.367 | 6/28/2010 09:44:00 | 24.0 | 5/12/2010 11:36:01 | 26.367 |
| 5/11/2010 13:47:01 | 24.429 | 6/28/2010 10:19:00 | 24.0 | 5/12/2010 11:56:01 | 26.367 |
| 5/11/2010 14:07:01 | 24.429 | 6/28/2010 10:54:00 | 24.0 | 5/12/2010 12:16:01 | 26.367 |
| 5/11/2010 14:27:01 | 24.429 | 6/28/2010 11:29:00 | 24.0 | 5/12/2010 12:36:01 | 26.367 |
| 5/11/2010 14:47:01 | 24.492 | 6/28/2010 12:04:00 | 24.0 | 5/12/2010 12:56:01 | 26.304 |
| 5/11/2010 15:07:01 | 24.492 | 6/28/2010 12:39:00 | 24.0 | 5/12/2010 13:16:01 | 26.304 |
| 5/11/2010 15:27:01 | 24.554 | 6/28/2010 13:14:00 | 24.0 | 5/12/2010 13:36:01 | 26.304 |
| 5/11/2010 15:47:01 | 24.554 | 6/28/2010 13:49:00 | 24.0 | 5/12/2010 13:56:01 | 26.304 |
| 5/11/2010 16:07:01 | 24.617 | 6/28/2010 14:24:00 | 24.0 | 5/12/2010 14:16:01 | 26.304 |
| 5/11/2010 16:27:01 | 24.617 | 6/28/2010 14:59:00 | 24.0 | 5/12/2010 14:36:01 | 26.304 |
| 5/11/2010 16:47:01 | 24.679 | 6/28/2010 15:34:00 | 24.0 | 5/12/2010 14:56:01 | 26.304 |
| 5/11/2010 17:07:01 | 24.742 | 6/28/2010 16:09:00 | 24.0 | 5/12/2010 15:16:01 | 26.304 |
| 5/11/2010 17:27:01 | 24.742 | 6/28/2010 16:44:00 | 24.5 | 5/12/2010 15:36:01 | 26.304 |
| 5/11/2010 17:47:01 | 24.804 | 6/28/2010 17:19:00 | 24.5 | 5/12/2010 15:56:01 | 26.304 |
| 5/11/2010 18:07:01 | 24.804 | 6/28/2010 17:54:00 | 24.5 | 5/12/2010 16:16:01 | 26.304 |
| 5/11/2010 18:27:01 | 24.867 | 6/28/2010 18:29:00 | 24.5 | 5/12/2010 16:36:01 | 26.304 |
| 5/11/2010 18:47:01 | 24.867 | 6/28/2010 19:04:00 | 24.5 | 5/12/2010 16:56:01 | 26.367 |
| 5/11/2010 19:07:01 | 24.867 | 6/28/2010 19:39:00 | 24.5 | 5/12/2010 17:16:01 | 26.367 |
| 5/11/2010 19:27:01 | 24.929 | 6/28/2010 20:14:00 | 24.5 | 5/12/2010 17:36:01 | 26.367 |
| 5/11/2010 19:47:01 | 24.929 | 6/28/2010 20:49:00 | 24.5 | 5/12/2010 17:56:01 | 26.367 |
| 5/11/2010 20:07:01 | 24.929 | 6/28/2010 21:24:00 | 24.5 | 5/12/2010 18:16:01 | 26.367 |
| 5/11/2010 20:27:01 | 24.929 | 6/28/2010 21:59:00 | 24.5 | 5/12/2010 18:36:01 | 26.367 |
| 5/11/2010 20:47:01 | 24.929 | 6/28/2010 22:34:00 | 24.5 | 5/12/2010 18:56:01 | 26.429 |
| 5/11/2010 21:07:01 | 24.929 | 6/28/2010 23:09:00 | 24.5 | 5/12/2010 19:16:01 | 26.429 |
| 5/11/2010 21:27:01 | 24.929 | 6/28/2010 23:44:00 | 24.5 | 5/12/2010 19:36:01 | 26.429 |
| 5/11/2010 21:47:01 | 24.929 | 6/29/2010 00:19:00 | 24.5 | 5/12/2010 19:56:01 | 26.429 |
| 5/11/2010 22:07:01 | 24.929 | 6/29/2010 00:54:00 | 24.5 | 5/12/2010 20:16:01 | 26.492 |
| 5/11/2010 22:27:01 | 24.929 | 6/29/2010 01:29:00 | 24.5 | 5/12/2010 20:36:01 | 26.492 |
| 5/11/2010 22:47:01 | 24.929 | 6/29/2010 02:04:00 | 24.0 | 5/12/2010 20:56:01 | 26.492 |
| 5/11/2010 23:07:01 | 24.929 | 6/29/2010 02:39:00 | 24.0 | 5/12/2010 21:16:01 | 26.492 |
| 5/11/2010 23:27:01 | 24.867 | 6/29/2010 03:14:00 | 24.0 | 5/12/2010 21:36:01 | 26.554 |
| 5/11/2010 23:47:01 | 24.867 | 6/29/2010 03:49:00 | 24.0 | 5/12/2010 21:56:01 | 26.554 |
| 5/12/2010 00:07:01 | 24.867 | 6/29/2010 04:24:00 | 24.0 | 5/12/2010 22:16:01 | 26.554 |
| 5/12/2010 00:27:01 | 24.867 | 6/29/2010 04:59:00 | 24.0 | 5/12/2010 22:36:01 | 26.554 |
| 5/12/2010 00:47:01 | 24.804 | 6/29/2010 05:34:00 | 24.0 | 5/12/2010 22:56:01 | 26.554 |
| 5/12/2010 01:07:01 | 24.804 | 6/29/2010 06:09:00 | 24.0 | 5/12/2010 23:16:01 | 26.554 |
| 5/12/2010 01:27:01 | 24.804 | 6/29/2010 06:44:00 | 24.0 | 5/12/2010 23:36:01 | 26.617 |

|                    |        |                    |      |                    |        |
|--------------------|--------|--------------------|------|--------------------|--------|
| 5/12/2010 01:47:01 | 24.742 | 6/29/2010 07:19:00 | 24.0 | 5/12/2010 23:56:01 | 26.617 |
| 5/12/2010 02:07:01 | 24.742 | 6/29/2010 07:54:00 | 24.0 | 5/13/2010 00:16:01 | 26.617 |
| 5/12/2010 02:27:01 | 24.742 | 6/29/2010 08:29:00 | 24.0 | 5/13/2010 00:36:01 | 26.617 |
| 5/12/2010 02:47:01 | 24.679 | 6/29/2010 09:04:00 | 24.0 | 5/13/2010 00:56:01 | 26.617 |
| 5/12/2010 03:07:01 | 24.679 | 6/29/2010 09:39:00 | 24.0 | 5/13/2010 01:16:01 | 26.617 |
| 5/12/2010 03:27:01 | 24.679 | 6/29/2010 10:14:00 | 24.0 | 5/13/2010 01:36:01 | 26.617 |
| 5/12/2010 03:47:01 | 24.617 | 6/29/2010 10:49:00 | 24.0 | 5/13/2010 01:56:01 | 26.617 |
| 5/12/2010 04:07:01 | 24.617 | 6/29/2010 11:24:00 | 24.0 | 5/13/2010 02:16:01 | 26.617 |
| 5/12/2010 04:27:01 | 24.617 | 6/29/2010 11:59:00 | 24.0 | 5/13/2010 02:36:01 | 26.617 |
| 5/12/2010 04:47:01 | 24.617 | 6/29/2010 12:34:00 | 23.5 | 5/13/2010 02:56:01 | 26.617 |
| 5/12/2010 05:07:01 | 24.554 | 6/29/2010 13:09:00 | 24.0 | 5/13/2010 03:16:01 | 26.617 |
| 5/12/2010 05:27:01 | 24.554 | 6/29/2010 13:44:00 | 24.0 | 5/13/2010 03:36:01 | 26.617 |
| 5/12/2010 05:47:01 | 24.554 | 6/29/2010 14:19:00 | 24.0 | 5/13/2010 03:56:01 | 26.617 |
| 5/12/2010 06:07:01 | 24.492 | 6/29/2010 14:54:00 | 24.0 | 5/13/2010 04:16:01 | 26.617 |
| 5/12/2010 06:27:01 | 24.492 | 6/29/2010 15:29:00 | 24.0 | 5/13/2010 04:36:01 | 26.554 |
| 5/12/2010 06:47:01 | 24.492 | 6/29/2010 16:04:00 | 24.0 | 5/13/2010 04:56:01 | 26.554 |
| 5/12/2010 07:07:01 | 24.492 | 6/29/2010 16:39:00 | 24.0 | 5/13/2010 05:16:01 | 26.554 |
| 5/12/2010 07:27:01 | 24.429 | 6/29/2010 17:14:00 | 24.0 | 5/13/2010 05:36:01 | 26.554 |
| 5/12/2010 07:47:01 | 24.429 | 6/29/2010 17:49:00 | 24.0 | 5/13/2010 05:56:01 | 26.554 |
| 5/12/2010 08:07:01 | 24.429 | 6/29/2010 18:24:00 | 24.0 | 5/13/2010 06:16:01 | 26.554 |
| 5/12/2010 08:27:01 | 24.429 | 6/29/2010 18:59:00 | 24.0 | 5/13/2010 06:36:01 | 26.554 |
| 5/12/2010 08:47:01 | 24.367 | 6/29/2010 19:34:00 | 24.0 | 5/13/2010 06:56:01 | 26.554 |
| 5/12/2010 09:07:01 | 24.367 | 6/29/2010 20:09:00 | 24.5 | 5/13/2010 07:16:01 | 26.554 |
| 5/12/2010 09:27:01 | 24.367 | 6/29/2010 20:44:00 | 24.5 | 5/13/2010 07:36:01 | 26.492 |
| 5/12/2010 09:47:01 | 24.304 | 6/29/2010 21:19:00 | 24.5 | 5/13/2010 07:56:01 | 26.492 |
| 5/12/2010 10:07:01 | 24.304 | 6/29/2010 21:54:00 | 24.5 | 5/13/2010 08:16:01 | 26.492 |
| 5/12/2010 10:27:01 | 24.304 | 6/29/2010 22:29:00 | 24.5 | 5/13/2010 08:36:01 | 26.492 |
| 5/12/2010 10:47:01 | 24.304 | 6/29/2010 23:04:00 | 24.5 | 5/13/2010 08:56:01 | 26.492 |
| 5/12/2010 11:07:01 | 24.304 | 6/29/2010 23:39:00 | 24.5 | 5/13/2010 09:16:01 | 26.492 |
| 5/12/2010 11:27:01 | 24.304 | 6/30/2010 00:14:00 | 24.5 | 5/13/2010 09:36:01 | 26.429 |
| 5/12/2010 11:47:01 | 24.304 | 6/30/2010 00:49:00 | 24.5 | 5/13/2010 09:56:01 | 26.429 |
| 5/12/2010 12:07:01 | 24.304 | 6/30/2010 01:24:00 | 24.5 | 5/13/2010 10:16:01 | 26.429 |
| 5/12/2010 12:27:01 | 24.304 | 6/30/2010 01:59:00 | 24.5 | 5/13/2010 10:36:01 | 26.429 |
| 5/12/2010 12:47:01 | 24.304 | 6/30/2010 02:34:00 | 24.5 | 5/13/2010 10:56:01 | 26.429 |
| 5/12/2010 13:07:01 | 24.304 | 6/30/2010 03:09:00 | 24.0 | 5/13/2010 11:16:01 | 26.367 |
| 5/12/2010 13:27:01 | 24.304 | 6/30/2010 03:44:00 | 24.0 | 5/13/2010 11:36:01 | 26.367 |
| 5/12/2010 13:47:01 | 24.367 | 6/30/2010 04:19:00 | 24.0 | 5/13/2010 11:56:01 | 26.367 |
| 5/12/2010 14:07:01 | 24.367 | 6/30/2010 04:54:00 | 24.0 | 5/13/2010 12:16:01 | 26.367 |
| 5/12/2010 14:27:01 | 24.429 | 6/30/2010 05:29:00 | 24.0 | 5/13/2010 12:36:01 | 26.367 |
| 5/12/2010 14:47:01 | 24.429 | 6/30/2010 06:04:00 | 24.0 | 5/13/2010 12:56:01 | 26.367 |
| 5/12/2010 15:07:01 | 24.492 | 6/30/2010 06:39:00 | 24.0 | 5/13/2010 13:16:01 | 26.304 |
| 5/12/2010 15:27:01 | 24.492 | 6/30/2010 07:14:00 | 24.0 | 5/13/2010 13:36:01 | 26.304 |
| 5/12/2010 15:47:01 | 24.554 | 6/30/2010 07:49:00 | 24.0 | 5/13/2010 13:56:01 | 26.304 |
| 5/12/2010 16:07:01 | 24.617 | 6/30/2010 08:24:00 | 24.0 | 5/13/2010 14:16:01 | 26.304 |
| 5/12/2010 16:27:01 | 24.617 | 6/30/2010 08:59:00 | 24.0 | 5/13/2010 14:36:01 | 26.304 |
| 5/12/2010 16:47:01 | 24.679 | 6/30/2010 09:34:00 | 24.0 | 5/13/2010 14:56:01 | 26.304 |
| 5/12/2010 17:07:01 | 24.742 | 6/30/2010 10:09:00 | 24.0 | 5/13/2010 15:16:01 | 26.304 |
| 5/12/2010 17:27:01 | 24.742 | 6/30/2010 10:44:00 | 24.0 | 5/13/2010 15:36:01 | 26.304 |
| 5/12/2010 17:47:01 | 24.804 | 6/30/2010 11:19:00 | 24.0 | 5/13/2010 15:56:01 | 26.304 |
| 5/12/2010 18:07:01 | 24.804 | 6/30/2010 11:54:00 | 24.0 | 5/13/2010 16:16:01 | 26.304 |

|                    |        |                    |      |                    |        |
|--------------------|--------|--------------------|------|--------------------|--------|
| 5/12/2010 18:27:01 | 24.867 | 6/30/2010 12:29:00 | 24.0 | 5/13/2010 16:36:01 | 26.304 |
| 5/12/2010 18:47:01 | 24.867 | 6/30/2010 13:04:00 | 24.0 | 5/13/2010 16:56:01 | 26.304 |
| 5/12/2010 19:07:01 | 24.867 | 6/30/2010 13:39:00 | 24.0 | 5/13/2010 17:16:01 | 26.367 |
| 5/12/2010 19:27:01 | 24.929 | 6/30/2010 14:14:00 | 24.0 | 5/13/2010 17:36:01 | 26.367 |
| 5/12/2010 19:47:01 | 24.929 | 6/30/2010 14:49:00 | 24.0 | 5/13/2010 17:56:01 | 26.367 |
| 5/12/2010 20:07:01 | 24.929 | 6/30/2010 15:24:00 | 24.0 | 5/13/2010 18:16:01 | 26.367 |
| 5/12/2010 20:27:01 | 24.929 | 6/30/2010 15:59:00 | 24.0 | 5/13/2010 18:36:01 | 26.367 |
| 5/12/2010 20:47:01 | 24.929 | 6/30/2010 16:34:00 | 24.0 | 5/13/2010 18:56:01 | 26.367 |
| 5/12/2010 21:07:01 | 24.992 | 6/30/2010 17:09:00 | 24.0 | 5/13/2010 19:16:01 | 26.429 |
| 5/12/2010 21:27:01 | 24.929 | 6/30/2010 17:44:00 | 24.0 | 5/13/2010 19:36:01 | 26.429 |
| 5/12/2010 21:47:01 | 24.929 | 6/30/2010 18:19:00 | 24.0 | 5/13/2010 19:56:01 | 26.429 |
| 5/12/2010 22:07:01 | 24.929 | 6/30/2010 18:54:00 | 24.0 | 5/13/2010 20:16:01 | 26.429 |
| 5/12/2010 22:27:01 | 24.929 | 6/30/2010 19:29:00 | 24.0 | 5/13/2010 20:36:01 | 26.492 |
| 5/12/2010 22:47:01 | 24.929 | 6/30/2010 20:04:00 | 24.0 | 5/13/2010 20:56:01 | 26.492 |
| 5/12/2010 23:07:01 | 24.929 | 6/30/2010 20:39:00 | 24.0 | 5/13/2010 21:16:01 | 26.492 |
| 5/12/2010 23:27:01 | 24.929 | 6/30/2010 21:14:00 | 24.0 | 5/13/2010 21:36:01 | 26.492 |
| 5/12/2010 23:47:01 | 24.929 | 6/30/2010 21:49:00 | 24.0 | 5/13/2010 21:56:01 | 26.554 |
| 5/13/2010 00:07:01 | 24.929 | 6/30/2010 22:24:00 | 24.0 | 5/13/2010 22:16:01 | 26.554 |
| 5/13/2010 00:27:01 | 24.867 | 6/30/2010 22:59:00 | 24.0 | 5/13/2010 22:36:01 | 26.554 |
| 5/13/2010 00:47:01 | 24.867 | 6/30/2010 23:34:00 | 24.0 | 5/13/2010 22:56:01 | 26.554 |
| 5/13/2010 01:07:01 | 24.867 | 7/1/2010 00:09:00  | 24.0 | 5/13/2010 23:16:01 | 26.554 |
| 5/13/2010 01:27:01 | 24.867 | 7/1/2010 00:44:00  | 24.0 | 5/13/2010 23:36:01 | 26.554 |
| 5/13/2010 01:47:01 | 24.804 | 7/1/2010 01:19:00  | 24.0 | 5/13/2010 23:56:01 | 26.554 |
| 5/13/2010 02:07:01 | 24.804 | 7/1/2010 01:54:00  | 24.0 | 5/14/2010 00:16:01 | 26.617 |
| 5/13/2010 02:27:01 | 24.804 | 7/1/2010 02:29:00  | 24.0 | 5/14/2010 00:36:01 | 26.617 |
| 5/13/2010 02:47:01 | 24.804 | 7/1/2010 03:04:00  | 24.0 | 5/14/2010 00:56:01 | 26.617 |
| 5/13/2010 03:07:01 | 24.742 | 7/1/2010 03:39:00  | 24.0 | 5/14/2010 01:16:01 | 26.617 |
| 5/13/2010 03:27:01 | 24.742 | 7/1/2010 04:14:00  | 24.0 | 5/14/2010 01:36:01 | 26.554 |
| 5/13/2010 03:47:01 | 24.742 | 7/1/2010 04:49:00  | 24.0 | 5/14/2010 01:56:01 | 26.617 |
| 5/13/2010 04:07:01 | 24.742 | 7/1/2010 05:24:00  | 24.0 | 5/14/2010 02:16:01 | 26.617 |
| 5/13/2010 04:27:01 | 24.679 | 7/1/2010 05:59:00  | 24.0 | 5/14/2010 02:36:01 | 26.617 |
| 5/13/2010 04:47:01 | 24.679 | 7/1/2010 06:34:00  | 23.5 | 5/14/2010 02:56:01 | 26.617 |
| 5/13/2010 05:07:01 | 24.679 | 7/1/2010 07:09:00  | 23.5 | 5/14/2010 03:16:01 | 26.554 |
| 5/13/2010 05:27:01 | 24.679 | 7/1/2010 07:44:00  | 23.5 | 5/14/2010 03:36:01 | 26.554 |
| 5/13/2010 05:47:01 | 24.617 | 7/1/2010 08:19:00  | 23.5 | 5/14/2010 03:56:01 | 26.554 |
| 5/13/2010 06:07:01 | 24.617 | 7/1/2010 08:54:00  | 23.5 | 5/14/2010 04:16:01 | 26.554 |
| 5/13/2010 06:27:01 | 24.617 | 7/1/2010 09:29:00  | 23.5 | 5/14/2010 04:36:01 | 26.554 |
| 5/13/2010 06:47:01 | 24.617 | 7/1/2010 10:04:00  | 23.5 | 5/14/2010 04:56:01 | 26.554 |
| 5/13/2010 07:07:01 | 24.554 | 7/1/2010 10:39:00  | 23.5 | 5/14/2010 05:16:01 | 26.554 |
| 5/13/2010 07:27:01 | 24.554 | 7/1/2010 11:14:00  | 23.5 | 5/14/2010 05:36:01 | 26.492 |
| 5/13/2010 07:47:01 | 24.554 | 7/1/2010 11:49:00  | 23.5 | 5/14/2010 05:56:01 | 26.492 |
| 5/13/2010 08:07:01 | 24.554 | 7/1/2010 12:24:00  | 23.5 | 5/14/2010 06:16:01 | 26.492 |
| 5/13/2010 08:27:01 | 24.492 | 7/1/2010 12:59:00  | 23.5 | 5/14/2010 06:36:01 | 26.492 |
| 5/13/2010 08:47:01 | 24.492 | 7/1/2010 13:34:00  | 23.5 | 5/14/2010 06:56:01 | 26.492 |
| 5/13/2010 09:07:01 | 24.492 | 7/1/2010 14:09:00  | 23.5 | 5/14/2010 07:16:01 | 26.492 |
| 5/13/2010 09:27:01 | 24.492 | 7/1/2010 14:44:00  | 23.5 | 5/14/2010 07:36:01 | 26.429 |
| 5/13/2010 09:47:01 | 24.429 | 7/1/2010 15:19:00  | 23.5 | 5/14/2010 07:56:01 | 26.429 |
| 5/13/2010 10:07:01 | 24.429 | 7/1/2010 15:54:00  | 23.5 | 5/14/2010 08:16:01 | 26.429 |
| 5/13/2010 10:27:01 | 24.429 | 7/1/2010 16:29:00  | 23.5 | 5/14/2010 08:36:01 | 26.429 |
| 5/13/2010 10:47:01 | 24.429 | 7/1/2010 17:04:00  | 23.5 | 5/14/2010 08:56:01 | 26.429 |

|                    |                          |                         |        |
|--------------------|--------------------------|-------------------------|--------|
| 5/13/2010 11:07:01 | 24.429 7/1/2010 17:39:00 | 23.5 5/14/2010 09:16:01 | 26.367 |
| 5/13/2010 11:27:01 | 24.429 7/1/2010 18:14:00 | 23.5 5/14/2010 09:36:01 | 26.367 |
| 5/13/2010 11:47:01 | 24.429 7/1/2010 18:49:00 | 23.5 5/14/2010 09:56:01 | 26.367 |
| 5/13/2010 12:07:01 | 24.429 7/1/2010 19:24:00 | 23.5 5/14/2010 10:16:01 | 26.367 |
| 5/13/2010 12:27:01 | 24.429 7/1/2010 19:59:00 | 23.5 5/14/2010 10:36:01 | 26.304 |
| 5/13/2010 12:47:01 | 24.429 7/1/2010 20:34:00 | 23.5 5/14/2010 10:56:01 | 26.304 |
| 5/13/2010 13:07:01 | 24.429 7/1/2010 21:09:00 | 23.5 5/14/2010 11:16:01 | 26.304 |
| 5/13/2010 13:27:01 | 24.429 7/1/2010 21:44:00 | 23.5 5/14/2010 11:36:01 | 26.304 |
| 5/13/2010 13:47:01 | 24.492 7/1/2010 22:19:00 | 23.5 5/14/2010 11:56:01 | 26.304 |
| 5/13/2010 14:07:01 | 24.492 7/1/2010 22:54:00 | 23.5 5/14/2010 12:16:01 | 26.304 |
| 5/13/2010 14:27:01 | 24.554 7/1/2010 23:29:00 | 23.5 5/14/2010 12:36:01 | 26.242 |
| 5/13/2010 14:47:01 | 24.554 7/2/2010 00:04:00 | 23.5 5/14/2010 12:56:01 | 26.242 |
| 5/13/2010 15:07:01 | 24.554 7/2/2010 00:39:00 | 23.5 5/14/2010 13:16:01 | 26.242 |
| 5/13/2010 15:27:01 | 24.617 7/2/2010 01:14:00 | 23.5 5/14/2010 13:36:01 | 26.242 |
| 5/13/2010 15:47:01 | 24.679 7/2/2010 01:49:00 | 23.5 5/14/2010 13:56:01 | 26.242 |
| 5/13/2010 16:07:01 | 24.679 7/2/2010 02:24:00 | 23.5 5/14/2010 14:16:01 | 26.242 |
| 5/13/2010 16:27:01 | 24.742 7/2/2010 02:59:00 | 23.5 5/14/2010 14:36:01 | 26.242 |
| 5/13/2010 16:47:01 | 24.742 7/2/2010 03:34:00 | 23.5 5/14/2010 14:56:01 | 26.242 |
| 5/13/2010 17:07:01 | 24.804 7/2/2010 04:09:00 | 23.5 5/14/2010 15:16:01 | 26.242 |
| 5/13/2010 17:27:01 | 24.804 7/2/2010 04:44:00 | 23.5 5/14/2010 15:36:01 | 26.242 |
| 5/13/2010 17:47:01 | 24.867 7/2/2010 05:19:00 | 23.5 5/14/2010 15:56:01 | 26.242 |
| 5/13/2010 18:07:01 | 24.867 7/2/2010 05:54:00 | 23.5 5/14/2010 16:16:01 | 26.242 |
| 5/13/2010 18:27:01 | 24.929 7/2/2010 06:29:00 | 23.5 5/14/2010 16:36:01 | 26.242 |
| 5/13/2010 18:47:01 | 24.929 7/2/2010 07:04:00 | 23.5 5/14/2010 16:56:01 | 26.242 |
| 5/13/2010 19:07:01 | 24.929 7/2/2010 07:39:00 | 23.5 5/14/2010 17:16:01 | 26.242 |
| 5/13/2010 19:27:01 | 24.992 7/2/2010 08:14:00 | 23.5 5/14/2010 17:36:01 | 26.242 |
| 5/13/2010 19:47:01 | 24.992 7/2/2010 08:49:00 | 23.5 5/14/2010 17:56:01 | 26.304 |
| 5/13/2010 20:07:01 | 24.992 7/2/2010 09:24:00 | 23.0 5/14/2010 18:16:01 | 26.304 |
| 5/13/2010 20:27:01 | 24.992 7/2/2010 09:59:00 | 23.0 5/14/2010 18:36:01 | 26.304 |
| 5/13/2010 20:47:01 | 24.992 7/2/2010 10:34:00 | 23.0 5/14/2010 18:56:01 | 26.304 |
| 5/13/2010 21:07:01 | 24.992 7/2/2010 11:09:00 | 23.0 5/14/2010 19:16:01 | 26.304 |
| 5/13/2010 21:27:01 | 24.992 7/2/2010 11:44:00 | 23.0 5/14/2010 19:36:01 | 26.367 |
| 5/13/2010 21:47:01 | 24.992 7/2/2010 12:19:00 | 23.0 5/14/2010 19:56:01 | 26.367 |
| 5/13/2010 22:07:01 | 24.992 7/2/2010 12:54:00 | 23.0 5/14/2010 20:16:01 | 26.367 |
| 5/13/2010 22:27:01 | 24.992 7/2/2010 13:29:00 | 23.0 5/14/2010 20:36:01 | 26.367 |
| 5/13/2010 22:47:01 | 24.929 7/2/2010 14:04:00 | 23.5 5/14/2010 20:56:01 | 26.429 |
| 5/13/2010 23:07:01 | 24.929 7/2/2010 14:39:00 | 23.5 5/14/2010 21:16:01 | 26.429 |
| 5/13/2010 23:27:01 | 24.929 7/2/2010 15:14:00 | 23.5 5/14/2010 21:36:01 | 26.429 |
| 5/13/2010 23:47:01 | 24.929 7/2/2010 15:49:00 | 23.5 5/14/2010 21:56:01 | 26.429 |
| 5/14/2010 00:07:01 | 24.867 7/2/2010 16:24:00 | 23.5 5/14/2010 22:16:01 | 26.429 |
| 5/14/2010 00:27:01 | 24.867 7/2/2010 16:59:00 | 23.5 5/14/2010 22:36:01 | 26.492 |
| 5/14/2010 00:47:01 | 24.867 7/2/2010 17:34:00 | 23.5 5/14/2010 22:56:01 | 26.492 |
| 5/14/2010 01:07:01 | 24.804 7/2/2010 18:09:00 | 23.5 5/14/2010 23:16:01 | 26.492 |
| 5/14/2010 01:27:01 | 24.804 7/2/2010 18:44:00 | 23.5 5/14/2010 23:36:01 | 26.492 |
| 5/14/2010 01:47:01 | 24.742 7/2/2010 19:19:00 | 23.5 5/14/2010 23:56:01 | 26.554 |
| 5/14/2010 02:07:01 | 24.742 7/2/2010 19:54:00 | 23.5 5/15/2010 00:16:01 | 26.554 |
| 5/14/2010 02:27:01 | 24.742 7/2/2010 20:29:00 | 23.5 5/15/2010 00:36:01 | 26.554 |
| 5/14/2010 02:47:01 | 24.679 7/2/2010 21:04:00 | 23.5 5/15/2010 00:56:01 | 26.554 |
| 5/14/2010 03:07:01 | 24.679 7/2/2010 21:39:00 | 23.5 5/15/2010 01:16:01 | 26.554 |
| 5/14/2010 03:27:01 | 24.617 7/2/2010 22:14:00 | 23.5 5/15/2010 01:36:01 | 26.554 |

|                    |                          |                         |        |
|--------------------|--------------------------|-------------------------|--------|
| 5/14/2010 03:47:01 | 24.617 7/2/2010 22:49:00 | 23.5 5/15/2010 01:56:01 | 26.554 |
| 5/14/2010 04:07:01 | 24.617 7/2/2010 23:24:00 | 23.5 5/15/2010 02:16:01 | 26.554 |
| 5/14/2010 04:27:01 | 24.554 7/2/2010 23:59:00 | 23.5 5/15/2010 02:36:01 | 26.554 |
| 5/14/2010 04:47:01 | 24.554 7/3/2010 00:34:00 | 23.5 5/15/2010 02:56:01 | 26.554 |
| 5/14/2010 05:07:01 | 24.492 7/3/2010 01:09:00 | 23.5 5/15/2010 03:16:01 | 26.554 |
| 5/14/2010 05:27:01 | 24.492 7/3/2010 01:44:00 | 23.5 5/15/2010 03:36:01 | 26.554 |
| 5/14/2010 05:47:01 | 24.492 7/3/2010 02:19:00 | 23.5 5/15/2010 03:56:01 | 26.554 |
| 5/14/2010 06:07:01 | 24.429 7/3/2010 02:54:00 | 23.5 5/15/2010 04:16:01 | 26.492 |
| 5/14/2010 06:27:01 | 24.429 7/3/2010 03:29:00 | 23.5 5/15/2010 04:36:01 | 26.554 |
| 5/14/2010 06:47:01 | 24.429 7/3/2010 04:04:00 | 23.5 5/15/2010 04:56:01 | 26.492 |
| 5/14/2010 07:07:01 | 24.367 7/3/2010 04:39:00 | 23.5 5/15/2010 05:16:01 | 26.492 |
| 5/14/2010 07:27:01 | 24.367 7/3/2010 05:14:00 | 23.5 5/15/2010 05:36:01 | 26.492 |
| 5/14/2010 07:47:01 | 24.367 7/3/2010 05:49:00 | 23.0 5/15/2010 05:56:01 | 26.492 |
| 5/14/2010 08:07:01 | 24.304 7/3/2010 06:24:00 | 23.0 5/15/2010 06:16:01 | 26.492 |
| 5/14/2010 08:27:01 | 24.304 7/3/2010 06:59:00 | 23.0 5/15/2010 06:36:01 | 26.492 |
| 5/14/2010 08:47:01 | 24.304 7/3/2010 07:34:00 | 23.0 5/15/2010 06:56:01 | 26.492 |
| 5/14/2010 09:07:01 | 24.304 7/3/2010 08:09:00 | 23.0 5/15/2010 07:16:01 | 26.492 |
| 5/14/2010 09:27:01 | 24.242 7/3/2010 08:44:00 | 23.0 5/15/2010 07:36:01 | 26.429 |
| 5/14/2010 09:47:01 | 24.242 7/3/2010 09:19:00 | 23.0 5/15/2010 07:56:01 | 26.429 |
| 5/14/2010 10:07:01 | 24.242 7/3/2010 09:54:00 | 23.0 5/15/2010 08:16:01 | 26.429 |
| 5/14/2010 10:27:01 | 24.242 7/3/2010 10:29:00 | 23.0 5/15/2010 08:36:01 | 26.429 |
| 5/14/2010 10:47:01 | 24.179 7/3/2010 11:04:00 | 23.0 5/15/2010 08:56:01 | 26.429 |
| 5/14/2010 11:07:01 | 24.179 7/3/2010 11:39:00 | 23.0 5/15/2010 09:16:01 | 26.367 |
| 5/14/2010 11:27:01 | 24.179 7/3/2010 12:14:00 | 23.0 5/15/2010 09:36:01 | 26.367 |
| 5/14/2010 11:47:01 | 24.179 7/3/2010 12:49:00 | 23.0 5/15/2010 09:56:01 | 26.367 |
| 5/14/2010 12:07:01 | 24.179 7/3/2010 13:24:00 | 23.0 5/15/2010 10:16:01 | 26.367 |
| 5/14/2010 12:27:01 | 24.179 7/3/2010 13:59:00 | 23.0 5/15/2010 10:36:01 | 26.304 |
| 5/14/2010 12:47:01 | 24.242 7/3/2010 14:34:00 | 23.0 5/15/2010 10:56:01 | 26.304 |
| 5/14/2010 13:07:01 | 24.242 7/3/2010 15:09:00 | 23.0 5/15/2010 11:16:01 | 26.304 |
| 5/14/2010 13:27:01 | 24.242 7/3/2010 15:44:00 | 23.0 5/15/2010 11:36:01 | 26.304 |
| 5/14/2010 13:47:01 | 24.304 7/3/2010 16:19:00 | 23.0 5/15/2010 11:56:01 | 26.242 |
| 5/14/2010 14:07:01 | 24.304 7/3/2010 16:54:00 | 23.5 5/15/2010 12:16:01 | 26.242 |
| 5/14/2010 14:27:01 | 24.367 7/3/2010 17:29:00 | 23.5 5/15/2010 12:36:01 | 26.242 |
| 5/14/2010 14:47:01 | 24.367 7/3/2010 18:04:00 | 23.5 5/15/2010 12:56:01 | 26.242 |
| 5/14/2010 15:07:01 | 24.429 7/3/2010 18:39:00 | 23.5 5/15/2010 13:16:01 | 26.242 |
| 5/14/2010 15:27:01 | 24.429 7/3/2010 19:14:00 | 23.5 5/15/2010 13:36:01 | 26.179 |
| 5/14/2010 15:47:01 | 24.492 7/3/2010 19:49:00 | 23.5 5/15/2010 13:56:01 | 26.179 |
| 5/14/2010 16:07:01 | 24.554 7/3/2010 20:24:00 | 23.5 5/15/2010 14:16:01 | 26.179 |
| 5/14/2010 16:27:01 | 24.554 7/3/2010 20:59:00 | 23.5 5/15/2010 14:36:01 | 26.179 |
| 5/14/2010 16:47:01 | 24.617 7/3/2010 21:34:00 | 23.5 5/15/2010 14:56:01 | 26.179 |
| 5/14/2010 17:07:01 | 24.617 7/3/2010 22:09:00 | 23.5 5/15/2010 15:16:01 | 26.179 |
| 5/14/2010 17:27:01 | 24.679 7/3/2010 22:44:00 | 23.5 5/15/2010 15:36:01 | 26.179 |
| 5/14/2010 17:47:01 | 24.679 7/3/2010 23:19:00 | 23.5 5/15/2010 15:56:01 | 26.179 |
| 5/14/2010 18:07:01 | 24.742 7/3/2010 23:54:00 | 23.5 5/15/2010 16:16:01 | 26.179 |
| 5/14/2010 18:27:01 | 24.742 7/4/2010 00:29:00 | 23.5 5/15/2010 16:36:01 | 26.179 |
| 5/14/2010 18:47:01 | 24.804 7/4/2010 01:04:00 | 23.5 5/15/2010 16:56:01 | 26.179 |
| 5/14/2010 19:07:01 | 24.804 7/4/2010 01:39:00 | 23.5 5/15/2010 17:16:01 | 26.179 |
| 5/14/2010 19:27:01 | 24.804 7/4/2010 02:14:00 | 23.5 5/15/2010 17:36:01 | 26.179 |
| 5/14/2010 19:47:01 | 24.867 7/4/2010 02:49:00 | 23.5 5/15/2010 17:56:01 | 26.179 |
| 5/14/2010 20:07:01 | 24.867 7/4/2010 03:24:00 | 23.5 5/15/2010 18:16:01 | 26.179 |

|                    |                          |                         |        |
|--------------------|--------------------------|-------------------------|--------|
| 5/14/2010 20:27:01 | 24.867 7/4/2010 03:59:00 | 23.5 5/15/2010 18:36:01 | 26.179 |
| 5/14/2010 20:47:01 | 24.867 7/4/2010 04:34:00 | 23.5 5/15/2010 18:56:01 | 26.179 |
| 5/14/2010 21:07:01 | 24.867 7/4/2010 05:09:00 | 23.5 5/15/2010 19:16:01 | 26.179 |
| 5/14/2010 21:27:01 | 24.867 7/4/2010 05:44:00 | 23.5 5/15/2010 19:36:01 | 26.242 |
| 5/14/2010 21:47:01 | 24.867 7/4/2010 06:19:00 | 23.5 5/15/2010 19:56:01 | 26.242 |
| 5/14/2010 22:07:01 | 24.867 7/4/2010 06:54:00 | 23.5 5/15/2010 20:16:01 | 26.242 |
| 5/14/2010 22:27:01 | 24.867 7/4/2010 07:29:00 | 23.0 5/15/2010 20:36:01 | 26.242 |
| 5/14/2010 22:47:01 | 24.867 7/4/2010 08:04:00 | 23.0 5/15/2010 20:56:01 | 26.242 |
| 5/14/2010 23:07:01 | 24.867 7/4/2010 08:39:00 | 23.0 5/15/2010 21:16:01 | 26.242 |
| 5/14/2010 23:27:01 | 24.867 7/4/2010 09:14:00 | 23.0 5/15/2010 21:36:01 | 26.304 |
| 5/14/2010 23:47:01 | 24.867 7/4/2010 09:49:00 | 23.0 5/15/2010 21:56:01 | 26.304 |
| 5/15/2010 00:07:01 | 24.867 7/4/2010 10:24:00 | 23.0 5/15/2010 22:16:01 | 26.304 |
| 5/15/2010 00:27:01 | 24.867 7/4/2010 10:59:00 | 23.0 5/15/2010 22:36:01 | 26.304 |
| 5/15/2010 00:47:01 | 24.867 7/4/2010 11:34:00 | 23.0 5/15/2010 22:56:01 | 26.304 |
| 5/15/2010 01:07:01 | 24.804 7/4/2010 12:09:00 | 23.0 5/15/2010 23:16:01 | 26.304 |
| 5/15/2010 01:27:01 | 24.804 7/4/2010 12:44:00 | 23.0 5/15/2010 23:36:01 | 26.304 |
| 5/15/2010 01:47:01 | 24.804 7/4/2010 13:19:00 | 23.0 5/15/2010 23:56:01 | 26.304 |
| 5/15/2010 02:07:01 | 24.804 7/4/2010 13:54:00 | 23.0 5/16/2010 00:16:01 | 26.304 |
| 5/15/2010 02:27:01 | 24.804 7/4/2010 14:29:00 | 23.0 5/16/2010 00:36:01 | 26.304 |
| 5/15/2010 02:47:01 | 24.804 7/4/2010 15:04:00 | 23.0 5/16/2010 00:56:01 | 26.304 |
| 5/15/2010 03:07:01 | 24.742 7/4/2010 15:39:00 | 23.5 5/16/2010 01:16:01 | 26.304 |
| 5/15/2010 03:27:01 | 24.742 7/4/2010 16:14:00 | 23.5 5/16/2010 01:36:01 | 26.304 |
| 5/15/2010 03:47:01 | 24.742 7/4/2010 16:49:00 | 23.5 5/16/2010 01:56:01 | 26.304 |
| 5/15/2010 04:07:01 | 24.742 7/4/2010 17:24:00 | 23.5 5/16/2010 02:16:01 | 26.304 |
| 5/15/2010 04:27:01 | 24.742 7/4/2010 17:59:00 | 23.5 5/16/2010 02:36:01 | 26.304 |
| 5/15/2010 04:47:01 | 24.679 7/4/2010 18:34:00 | 23.5 5/16/2010 02:56:01 | 26.304 |
| 5/15/2010 05:07:01 | 24.679 7/4/2010 19:09:00 | 23.5 5/16/2010 03:16:01 | 26.242 |
| 5/15/2010 05:27:01 | 24.679 7/4/2010 19:44:00 | 23.5 5/16/2010 03:36:01 | 26.242 |
| 5/15/2010 05:47:01 | 24.679 7/4/2010 20:19:00 | 23.5 5/16/2010 03:56:01 | 26.242 |
| 5/15/2010 06:07:01 | 24.617 7/4/2010 20:54:00 | 23.5 5/16/2010 04:16:01 | 26.242 |
| 5/15/2010 06:27:01 | 24.617 7/4/2010 21:29:00 | 23.5 5/16/2010 04:36:01 | 26.242 |
| 5/15/2010 06:47:01 | 24.617 7/4/2010 22:04:00 | 23.5 5/16/2010 04:56:01 | 26.242 |
| 5/15/2010 07:07:01 | 24.554 7/4/2010 22:39:00 | 23.5 5/16/2010 05:16:01 | 26.242 |
| 5/15/2010 07:27:01 | 24.554 7/4/2010 23:14:00 | 23.5 5/16/2010 05:36:01 | 26.179 |
| 5/15/2010 07:47:01 | 24.554 7/4/2010 23:49:00 | 23.5 5/16/2010 05:56:01 | 26.179 |
| 5/15/2010 08:07:01 | 24.492 7/5/2010 00:24:00 | 23.5 5/16/2010 06:16:01 | 26.179 |
| 5/15/2010 08:27:01 | 24.492 7/5/2010 00:59:00 | 23.5 5/16/2010 06:36:01 | 26.179 |
| 5/15/2010 08:47:01 | 24.429 7/5/2010 01:34:00 | 23.5 5/16/2010 06:56:01 | 26.179 |
| 5/15/2010 09:07:01 | 24.429 7/5/2010 02:09:00 | 23.5 5/16/2010 07:16:01 | 26.117 |
| 5/15/2010 09:27:01 | 24.429 7/5/2010 02:44:00 | 23.5 5/16/2010 07:36:01 | 26.117 |
| 5/15/2010 09:47:01 | 24.367 7/5/2010 03:19:00 | 23.5 5/16/2010 07:56:01 | 26.117 |
| 5/15/2010 10:07:01 | 24.304 7/5/2010 03:54:00 | 23.5 5/16/2010 08:16:01 | 26.117 |
| 5/15/2010 10:27:01 | 24.304 7/5/2010 04:29:00 | 23.5 5/16/2010 08:36:01 | 26.054 |
| 5/15/2010 10:47:01 | 24.304 7/5/2010 05:04:00 | 23.5 5/16/2010 08:56:01 | 26.054 |
| 5/15/2010 11:07:01 | 24.242 7/5/2010 05:39:00 | 23.5 5/16/2010 09:16:01 | 26.054 |
| 5/15/2010 11:27:01 | 24.242 7/5/2010 06:14:00 | 23.0 5/16/2010 09:36:01 | 26.054 |
| 5/15/2010 11:47:01 | 24.242 7/5/2010 06:49:00 | 23.0 5/16/2010 09:56:01 | 25.992 |
| 5/15/2010 12:07:01 | 24.242 7/5/2010 07:24:00 | 23.0 5/16/2010 10:16:01 | 25.992 |
| 5/15/2010 12:27:01 | 24.242 7/5/2010 07:59:00 | 23.0 5/16/2010 10:36:01 | 25.992 |
| 5/15/2010 12:47:01 | 24.242 7/5/2010 08:34:00 | 23.0 5/16/2010 10:56:01 | 25.992 |

|                    |                          |                         |        |
|--------------------|--------------------------|-------------------------|--------|
| 5/15/2010 13:07:01 | 24.242 7/5/2010 09:09:00 | 23.0 5/16/2010 11:16:01 | 25.929 |
| 5/15/2010 13:27:01 | 24.242 7/5/2010 09:44:00 | 23.0 5/16/2010 11:36:01 | 25.929 |
| 5/15/2010 13:47:01 | 24.242 7/5/2010 10:19:00 | 23.0 5/16/2010 11:56:01 | 25.929 |
| 5/15/2010 14:07:01 | 24.242 7/5/2010 10:54:00 | 23.0 5/16/2010 12:16:01 | 25.929 |
| 5/15/2010 14:27:01 | 24.242 7/5/2010 11:29:00 | 23.0 5/16/2010 12:36:01 | 25.929 |
| 5/15/2010 14:47:01 | 24.304 7/5/2010 12:04:00 | 23.0 5/16/2010 12:56:01 | 25.867 |
| 5/15/2010 15:07:01 | 24.304 7/5/2010 12:39:00 | 23.0 5/16/2010 13:16:01 | 25.867 |
| 5/15/2010 15:27:01 | 24.367 7/5/2010 13:14:00 | 23.0 5/16/2010 13:36:01 | 25.867 |
| 5/15/2010 15:47:01 | 24.367 7/5/2010 13:49:00 | 23.0 5/16/2010 13:56:01 | 25.867 |
| 5/15/2010 16:07:01 | 24.429 7/5/2010 14:24:00 | 23.0 5/16/2010 14:16:01 | 25.867 |
| 5/15/2010 16:27:01 | 24.429 7/5/2010 14:59:00 | 23.0 5/16/2010 14:36:01 | 25.867 |
| 5/15/2010 16:47:01 | 24.492 7/5/2010 15:34:00 | 23.0 5/16/2010 14:56:01 | 25.867 |
| 5/15/2010 17:07:01 | 24.492 7/5/2010 16:09:00 | 23.0 5/16/2010 15:16:01 | 25.867 |
| 5/15/2010 17:27:01 | 24.554 7/5/2010 16:44:00 | 23.0 5/16/2010 15:36:01 | 25.867 |
| 5/15/2010 17:47:01 | 24.554 7/5/2010 17:19:00 | 23.0 5/16/2010 15:56:01 | 25.867 |
| 5/15/2010 18:07:01 | 24.554 7/5/2010 17:54:00 | 23.0 5/16/2010 16:16:01 | 25.804 |
| 5/15/2010 18:27:01 | 24.617 7/5/2010 18:29:00 | 23.0 5/16/2010 16:36:01 | 25.867 |
| 5/15/2010 18:47:01 | 24.617 7/5/2010 19:04:00 | 23.5 5/16/2010 16:56:01 | 25.867 |
| 5/15/2010 19:07:01 | 24.617 7/5/2010 19:39:00 | 23.5 5/16/2010 17:16:01 | 25.867 |
| 5/15/2010 19:27:01 | 24.617 7/5/2010 20:14:00 | 23.5 5/16/2010 17:36:01 | 25.867 |
| 5/15/2010 19:47:01 | 24.679 7/5/2010 20:49:00 | 23.5 5/16/2010 17:56:01 | 25.867 |
| 5/15/2010 20:07:01 | 24.679 7/5/2010 21:24:00 | 23.5 5/16/2010 18:16:01 | 25.867 |
| 5/15/2010 20:27:01 | 24.679 7/5/2010 21:59:00 | 23.5 5/16/2010 18:36:01 | 25.867 |
| 5/15/2010 20:47:01 | 24.679 7/5/2010 22:34:00 | 23.5 5/16/2010 18:56:01 | 25.929 |
| 5/15/2010 21:07:01 | 24.679 7/5/2010 23:09:00 | 23.5 5/16/2010 19:16:01 | 25.929 |
| 5/15/2010 21:27:01 | 24.679 7/5/2010 23:44:00 | 23.0 5/16/2010 19:36:01 | 25.929 |
| 5/15/2010 21:47:01 | 24.679 7/6/2010 00:19:00 | 23.0 5/16/2010 19:56:01 | 25.929 |
| 5/15/2010 22:07:01 | 24.679 7/6/2010 00:54:00 | 23.0 5/16/2010 20:16:01 | 25.992 |
| 5/15/2010 22:27:01 | 24.617 7/6/2010 01:29:00 | 23.0 5/16/2010 20:36:01 | 25.992 |
| 5/15/2010 22:47:01 | 24.617 7/6/2010 02:04:00 | 23.0 5/16/2010 20:56:01 | 25.992 |
| 5/15/2010 23:07:01 | 24.617 7/6/2010 02:39:00 | 23.0 5/16/2010 21:16:01 | 25.992 |
| 5/15/2010 23:27:01 | 24.617 7/6/2010 03:14:00 | 23.0 5/16/2010 21:36:01 | 25.992 |
| 5/15/2010 23:47:01 | 24.554 7/6/2010 03:49:00 | 23.0 5/16/2010 21:56:01 | 25.992 |
| 5/16/2010 00:07:01 | 24.554 7/6/2010 04:24:00 | 23.0 5/16/2010 22:16:01 | 25.992 |
| 5/16/2010 00:27:01 | 24.554 7/6/2010 04:59:00 | 23.0 5/16/2010 22:36:01 | 26.054 |
| 5/16/2010 00:47:01 | 24.492 7/6/2010 05:34:00 | 23.0 5/16/2010 22:56:01 | 26.054 |
| 5/16/2010 01:07:01 | 24.492 7/6/2010 06:09:00 | 23.0 5/16/2010 23:16:01 | 26.054 |
| 5/16/2010 01:27:01 | 24.492 7/6/2010 06:44:00 | 23.0 5/16/2010 23:36:01 | 26.054 |
| 5/16/2010 01:47:01 | 24.429 7/6/2010 07:19:00 | 22.5 5/16/2010 23:56:01 | 26.054 |
| 5/16/2010 02:07:01 | 24.429 7/6/2010 07:54:00 | 22.5 5/17/2010 00:16:01 | 26.054 |
| 5/16/2010 02:27:01 | 24.429 7/6/2010 08:29:00 | 22.5 5/17/2010 00:36:01 | 26.054 |
| 5/16/2010 02:47:01 | 24.367 7/6/2010 09:04:00 | 22.5 5/17/2010 00:56:01 | 25.992 |
| 5/16/2010 03:07:01 | 24.367 7/6/2010 09:39:00 | 22.5 5/17/2010 01:16:01 | 26.054 |
| 5/16/2010 03:27:01 | 24.304 7/6/2010 10:14:00 | 22.5 5/17/2010 01:36:01 | 25.992 |
| 5/16/2010 03:47:01 | 24.304 7/6/2010 10:49:00 | 22.5 5/17/2010 01:56:01 | 25.992 |
| 5/16/2010 04:07:01 | 24.304 7/6/2010 11:24:00 | 22.5 5/17/2010 02:16:01 | 25.992 |
| 5/16/2010 04:27:01 | 24.242 7/6/2010 11:59:00 | 22.5 5/17/2010 02:36:01 | 25.992 |
| 5/16/2010 04:47:01 | 24.242 7/6/2010 12:34:00 | 22.5 5/17/2010 02:56:01 | 25.992 |
| 5/16/2010 05:07:01 | 24.242 7/6/2010 13:09:00 | 22.5 5/17/2010 03:16:01 | 25.992 |
| 5/16/2010 05:27:01 | 24.179 7/6/2010 13:44:00 | 22.5 5/17/2010 03:36:01 | 25.992 |

|                    |                          |                         |        |
|--------------------|--------------------------|-------------------------|--------|
| 5/16/2010 05:47:01 | 24.179 7/6/2010 14:19:00 | 22.5 5/17/2010 03:56:01 | 25.992 |
| 5/16/2010 06:07:01 | 24.179 7/6/2010 14:54:00 | 22.5 5/17/2010 04:16:01 | 25.929 |
| 5/16/2010 06:27:01 | 24.117 7/6/2010 15:29:00 | 22.5 5/17/2010 04:36:01 | 25.929 |
| 5/16/2010 06:47:01 | 24.117 7/6/2010 16:04:00 | 23.0 5/17/2010 04:56:01 | 25.929 |
| 5/16/2010 07:07:01 | 24.117 7/6/2010 16:39:00 | 23.0 5/17/2010 05:16:01 | 25.929 |
| 5/16/2010 07:27:01 | 24.054 7/6/2010 17:14:00 | 23.0 5/17/2010 05:36:01 | 25.867 |
| 5/16/2010 07:47:01 | 24.054 7/6/2010 17:49:00 | 23.0 5/17/2010 05:56:01 | 25.867 |
| 5/16/2010 08:07:01 | 24.054 7/6/2010 18:24:00 | 23.0 5/17/2010 06:16:01 | 25.867 |
| 5/16/2010 08:27:01 | 24.054 7/6/2010 18:59:00 | 23.0 5/17/2010 06:36:01 | 25.867 |
| 5/16/2010 08:47:01 | 23.992 7/6/2010 19:34:00 | 23.0 5/17/2010 06:56:01 | 25.867 |
| 5/16/2010 09:07:01 | 23.992 7/6/2010 20:09:00 | 23.0 5/17/2010 07:16:01 | 25.804 |
| 5/16/2010 09:27:01 | 23.992 7/6/2010 20:44:00 | 23.0 5/17/2010 07:36:01 | 25.804 |
| 5/16/2010 09:47:01 | 23.929 7/6/2010 21:19:00 | 23.0 5/17/2010 07:56:01 | 25.804 |
| 5/16/2010 10:07:01 | 23.929 7/6/2010 21:54:00 | 23.0 5/17/2010 08:16:01 | 25.804 |
| 5/16/2010 10:27:01 | 23.929 7/6/2010 22:29:00 | 23.0 5/17/2010 08:36:01 | 25.742 |
| 5/16/2010 10:47:01 | 23.929 7/6/2010 23:04:00 | 23.0 5/17/2010 08:56:01 | 25.742 |
| 5/16/2010 11:07:01 | 23.929 7/6/2010 23:39:00 | 23.0 5/17/2010 09:16:01 | 25.742 |
| 5/16/2010 11:27:01 | 23.867 7/7/2010 00:14:00 | 23.0 5/17/2010 09:36:01 | 25.742 |
| 5/16/2010 11:47:01 | 23.867 7/7/2010 00:49:00 | 23.0 5/17/2010 09:56:01 | 25.679 |
| 5/16/2010 12:07:01 | 23.867 7/7/2010 01:24:00 | 23.0 5/17/2010 10:16:01 | 25.679 |
| 5/16/2010 12:27:01 | 23.867 7/7/2010 01:59:00 | 23.0 5/17/2010 10:36:01 | 25.679 |
| 5/16/2010 12:47:01 | 23.867 7/7/2010 02:34:00 | 23.0 5/17/2010 10:56:01 | 25.679 |
| 5/16/2010 13:07:01 | 23.929 7/7/2010 03:09:00 | 23.0 5/17/2010 11:16:01 | 25.617 |
| 5/16/2010 13:27:01 | 23.929 7/7/2010 03:44:00 | 23.0 5/17/2010 11:36:01 | 25.617 |
| 5/16/2010 13:47:01 | 23.929 7/7/2010 04:19:00 | 23.0 5/17/2010 11:56:01 | 25.617 |
| 5/16/2010 14:07:01 | 23.929 7/7/2010 04:54:00 | 23.0 5/17/2010 12:16:01 | 25.617 |
| 5/16/2010 14:27:01 | 23.992 7/7/2010 05:29:00 | 23.0 5/17/2010 12:36:01 | 25.554 |
| 5/16/2010 14:47:01 | 23.992 7/7/2010 06:04:00 | 23.0 5/17/2010 12:56:01 | 25.554 |
| 5/16/2010 15:07:01 | 24.054 7/7/2010 06:39:00 | 23.0 5/17/2010 13:16:01 | 25.554 |
| 5/16/2010 15:27:01 | 24.054 7/7/2010 07:14:00 | 23.0 5/17/2010 13:36:01 | 25.554 |
| 5/16/2010 15:47:01 | 24.117 7/7/2010 07:49:00 | 23.0 5/17/2010 13:56:01 | 25.554 |
| 5/16/2010 16:07:01 | 24.117 7/7/2010 08:24:00 | 23.0 5/17/2010 14:16:01 | 25.554 |
| 5/16/2010 16:27:01 | 24.179 7/7/2010 08:59:00 | 23.0 5/17/2010 14:36:01 | 25.554 |
| 5/16/2010 16:47:01 | 24.179 7/7/2010 09:34:00 | 23.0 5/17/2010 14:56:01 | 25.554 |
| 5/16/2010 17:07:01 | 24.242 7/7/2010 10:09:00 | 23.0 5/17/2010 15:16:01 | 25.554 |
| 5/16/2010 17:27:01 | 24.242 7/7/2010 10:44:00 | 23.0 5/17/2010 15:36:01 | 25.554 |
| 5/16/2010 17:47:01 | 24.304 7/7/2010 11:19:00 | 23.0 5/17/2010 15:56:01 | 25.554 |
| 5/16/2010 18:07:01 | 24.304 7/7/2010 11:54:00 | 23.0 5/17/2010 16:16:01 | 25.554 |
| 5/16/2010 18:27:01 | 24.367 7/7/2010 12:29:00 | 23.0 5/17/2010 16:36:01 | 25.554 |
| 5/16/2010 18:47:01 | 24.367 7/7/2010 13:04:00 | 23.0 5/17/2010 16:56:01 | 25.554 |
| 5/16/2010 19:07:01 | 24.367 7/7/2010 13:39:00 | 23.0 5/17/2010 17:16:01 | 25.554 |
| 5/16/2010 19:27:01 | 24.367 7/7/2010 14:14:00 | 23.0 5/17/2010 17:36:01 | 25.554 |
| 5/16/2010 19:47:01 | 24.429 7/7/2010 14:49:00 | 23.0 5/17/2010 17:56:01 | 25.617 |
| 5/16/2010 20:07:01 | 24.429 7/7/2010 15:24:00 | 23.0 5/17/2010 18:16:01 | 25.617 |
| 5/16/2010 20:27:01 | 24.429 7/7/2010 15:59:00 | 23.0 5/17/2010 18:36:01 | 25.617 |
| 5/16/2010 20:47:01 | 24.429 7/7/2010 16:34:00 | 23.0 5/17/2010 18:56:01 | 25.617 |
| 5/16/2010 21:07:01 | 24.429 7/7/2010 17:09:00 | 23.0 5/17/2010 19:16:01 | 25.679 |
| 5/16/2010 21:27:01 | 24.429 7/7/2010 17:44:00 | 23.0 5/17/2010 19:36:01 | 25.679 |
| 5/16/2010 21:47:01 | 24.367 7/7/2010 18:19:00 | 23.5 5/17/2010 19:56:01 | 25.679 |
| 5/16/2010 22:07:01 | 24.367 7/7/2010 18:54:00 | 23.5 5/17/2010 20:16:01 | 25.679 |



|                    |                          |                         |        |
|--------------------|--------------------------|-------------------------|--------|
| 5/16/2010 22:27:01 | 24.367 7/7/2010 19:29:00 | 23.5 5/17/2010 20:36:01 | 25.742 |
| 5/16/2010 22:47:01 | 24.367 7/7/2010 20:04:00 | 23.5 5/17/2010 20:56:01 | 25.742 |
| 5/16/2010 23:07:01 | 24.304 7/7/2010 20:39:00 | 23.5 5/17/2010 21:16:01 | 25.742 |
| 5/16/2010 23:27:01 | 24.304 7/7/2010 21:14:00 | 23.5 5/17/2010 21:36:01 | 25.742 |
| 5/16/2010 23:47:01 | 24.304 7/7/2010 21:49:00 | 23.5 5/17/2010 21:56:01 | 25.804 |
| 5/17/2010 00:07:01 | 24.242 7/7/2010 22:24:00 | 23.5 5/17/2010 22:16:01 | 25.804 |
| 5/17/2010 00:27:01 | 24.242 7/7/2010 22:59:00 | 23.5 5/17/2010 22:36:01 | 25.804 |
| 5/17/2010 00:47:01 | 24.242 7/7/2010 23:34:00 | 23.5 5/17/2010 22:56:01 | 25.804 |
| 5/17/2010 01:07:01 | 24.179 7/8/2010 00:09:00 | 23.5 5/17/2010 23:16:01 | 25.867 |
| 5/17/2010 01:27:01 | 24.179 7/8/2010 00:44:00 | 23.5 5/17/2010 23:36:01 | 25.867 |
| 5/17/2010 01:47:01 | 24.117 7/8/2010 01:19:00 | 23.5 5/17/2010 23:56:01 | 25.867 |
| 5/17/2010 02:07:01 | 24.117 7/8/2010 01:54:00 | 23.5 5/18/2010 00:16:01 | 25.867 |
| 5/17/2010 02:27:01 | 24.117 7/8/2010 02:29:00 | 23.5 5/18/2010 00:36:01 | 25.867 |
| 5/17/2010 02:47:01 | 24.054 7/8/2010 03:04:00 | 23.5 5/18/2010 00:56:01 | 25.867 |
| 5/17/2010 03:07:01 | 24.054 7/8/2010 03:39:00 | 23.0 5/18/2010 01:16:01 | 25.867 |
| 5/17/2010 03:27:01 | 23.992 7/8/2010 04:14:00 | 23.0 5/18/2010 01:36:01 | 25.867 |
| 5/17/2010 03:47:01 | 23.992 7/8/2010 04:49:00 | 23.0 5/18/2010 01:56:01 | 25.867 |
| 5/17/2010 04:07:01 | 23.992 7/8/2010 05:24:00 | 23.0 5/18/2010 02:16:01 | 25.867 |
| 5/17/2010 04:27:01 | 23.929 7/8/2010 05:59:00 | 23.0 5/18/2010 02:36:01 | 25.867 |
| 5/17/2010 04:47:01 | 23.929 7/8/2010 06:34:00 | 23.0 5/18/2010 02:56:01 | 25.867 |
| 5/17/2010 05:07:01 | 23.867 7/8/2010 07:09:00 | 23.0 5/18/2010 03:16:01 | 25.867 |
| 5/17/2010 05:27:01 | 23.867 7/8/2010 07:44:00 | 23.0 5/18/2010 03:36:01 | 25.867 |
| 5/17/2010 05:47:01 | 23.804 7/8/2010 08:19:00 | 23.0 5/18/2010 03:56:01 | 25.867 |
| 5/17/2010 06:07:01 | 23.804 7/8/2010 08:54:00 | 23.0 5/18/2010 04:16:01 | 25.867 |
| 5/17/2010 06:27:01 | 23.804 7/8/2010 09:29:00 | 23.0 5/18/2010 04:36:01 | 25.867 |
| 5/17/2010 06:47:01 | 23.742 7/8/2010 10:04:00 | 23.0 5/18/2010 04:56:01 | 25.867 |
| 5/17/2010 07:07:01 | 23.742 7/8/2010 10:39:00 | 23.0 5/18/2010 05:16:01 | 25.867 |
| 5/17/2010 07:27:01 | 23.742 7/8/2010 11:14:00 | 23.0 5/18/2010 05:36:01 | 25.867 |
| 5/17/2010 07:47:01 | 23.679 7/8/2010 11:49:00 | 23.0 5/18/2010 05:56:01 | 25.867 |
| 5/17/2010 08:07:01 | 23.679 7/8/2010 12:24:00 | 23.0 5/18/2010 06:16:01 | 25.867 |
| 5/17/2010 08:27:01 | 23.617 7/8/2010 12:59:00 | 23.0 5/18/2010 06:36:01 | 25.867 |
| 5/17/2010 08:47:01 | 23.617 7/8/2010 13:34:00 | 23.0 5/18/2010 06:56:01 | 25.867 |
| 5/17/2010 09:07:01 | 23.617 7/8/2010 14:09:00 | 23.0 5/18/2010 07:16:01 | 25.867 |
| 5/17/2010 09:27:01 | 23.554 7/8/2010 14:44:00 | 23.0 5/18/2010 07:36:01 | 25.867 |
| 5/17/2010 09:47:01 | 23.554 7/8/2010 15:19:00 | 23.0 5/18/2010 07:56:01 | 25.867 |
| 5/17/2010 10:07:01 | 23.554 7/8/2010 15:54:00 | 23.0 5/18/2010 08:16:01 | 25.867 |
| 5/17/2010 10:27:01 | 23.492 7/8/2010 16:29:00 | 23.0 5/18/2010 08:36:01 | 25.804 |
| 5/17/2010 10:47:01 | 23.492 7/8/2010 17:04:00 | 23.0 5/18/2010 08:56:01 | 25.804 |
| 5/17/2010 11:07:01 | 23.492 7/8/2010 17:39:00 | 23.0 5/18/2010 09:16:01 | 25.804 |
| 5/17/2010 11:27:01 | 23.492 7/8/2010 18:14:00 | 23.0 5/18/2010 09:36:01 | 25.804 |
| 5/17/2010 11:47:01 | 23.492 7/8/2010 18:49:00 | 23.0 5/18/2010 09:56:01 | 25.804 |
| 5/17/2010 12:07:01 | 23.492 7/8/2010 19:24:00 | 23.5 5/18/2010 10:16:01 | 25.804 |
| 5/17/2010 12:27:01 | 23.492 7/8/2010 19:59:00 | 23.5 5/18/2010 10:36:01 | 25.804 |
| 5/17/2010 12:47:01 | 23.492 7/8/2010 20:34:00 | 23.5 5/18/2010 10:56:01 | 25.804 |
| 5/17/2010 13:07:01 | 23.554 7/8/2010 21:09:00 | 23.5 5/18/2010 11:16:01 | 25.742 |
| 5/17/2010 13:27:01 | 23.554 7/8/2010 21:44:00 | 23.5 5/18/2010 11:36:01 | 25.742 |
| 5/17/2010 13:47:01 | 23.554 7/8/2010 22:19:00 | 23.5 5/18/2010 11:56:01 | 25.742 |
| 5/17/2010 14:07:01 | 23.617 7/8/2010 22:54:00 | 23.5 5/18/2010 12:16:01 | 25.742 |
| 5/17/2010 14:27:01 | 23.617 7/8/2010 23:29:00 | 23.5 5/18/2010 12:36:01 | 25.742 |
| 5/17/2010 14:47:01 | 23.679 7/9/2010 00:04:00 | 23.5 5/18/2010 12:56:01 | 25.742 |

|                    |                           |                         |        |
|--------------------|---------------------------|-------------------------|--------|
| 5/17/2010 15:07:01 | 23.679 7/9/2010 00:39:00  | 23.5 5/18/2010 13:16:01 | 25.742 |
| 5/17/2010 15:27:01 | 23.742 7/9/2010 01:14:00  | 23.5 5/18/2010 13:36:01 | 25.742 |
| 5/17/2010 15:47:01 | 23.804 7/9/2010 01:49:00  | 23.5 5/18/2010 13:56:01 | 25.742 |
| 5/17/2010 16:07:01 | 23.804 7/9/2010 02:24:00  | 23.0 5/18/2010 14:16:01 | 25.742 |
| 5/17/2010 16:27:01 | 23.867 7/9/2010 02:59:00  | 23.0 5/18/2010 14:36:01 | 25.742 |
| 5/17/2010 16:47:01 | 23.929 7/9/2010 03:34:00  | 23.0 5/18/2010 14:56:01 | 25.742 |
| 5/17/2010 17:07:01 | 23.929 7/9/2010 04:09:00  | 23.0 5/18/2010 15:16:01 | 25.742 |
| 5/17/2010 17:27:01 | 23.992 7/9/2010 04:44:00  | 23.0 5/18/2010 15:36:01 | 25.742 |
| 5/17/2010 17:47:01 | 24.054 7/9/2010 05:19:00  | 23.0 5/18/2010 15:56:01 | 25.742 |
| 5/17/2010 18:07:01 | 24.054 7/9/2010 05:54:00  | 23.0 5/18/2010 16:16:01 | 25.742 |
| 5/17/2010 18:27:01 | 24.117 7/9/2010 06:29:00  | 23.0 5/18/2010 16:36:01 | 25.742 |
| 5/17/2010 18:47:01 | 24.117 7/9/2010 07:04:00  | 23.0 5/18/2010 16:56:01 | 25.742 |
| 5/17/2010 19:07:01 | 24.179 7/9/2010 07:39:00  | 23.0 5/18/2010 17:16:01 | 25.742 |
| 5/17/2010 19:27:01 | 24.179 7/9/2010 08:14:00  | 23.0 5/18/2010 17:36:01 | 25.804 |
| 5/17/2010 19:47:01 | 24.179 7/9/2010 08:49:00  | 23.0 5/18/2010 17:56:01 | 25.804 |
| 5/17/2010 20:07:01 | 24.179 7/9/2010 09:24:00  | 23.0 5/18/2010 18:16:01 | 25.804 |
| 5/17/2010 20:27:01 | 24.242 7/9/2010 09:59:00  | 23.0 5/18/2010 18:36:01 | 25.804 |
| 5/17/2010 20:47:01 | 24.242 7/9/2010 10:34:00  | 23.0 5/18/2010 18:56:01 | 25.867 |
| 5/17/2010 21:07:01 | 24.242 7/9/2010 11:09:00  | 23.0 5/18/2010 19:16:01 | 25.867 |
| 5/17/2010 21:27:01 | 24.242 7/9/2010 11:44:00  | 23.0 5/18/2010 19:36:01 | 25.867 |
| 5/17/2010 21:47:01 | 24.242 7/9/2010 12:19:00  | 23.0 5/18/2010 19:56:01 | 25.867 |
| 5/17/2010 22:07:01 | 24.242 7/9/2010 12:54:00  | 23.0 5/18/2010 20:16:01 | 25.929 |
| 5/17/2010 22:27:01 | 24.242 7/9/2010 13:29:00  | 23.0 5/18/2010 20:36:01 | 25.929 |
| 5/17/2010 22:47:01 | 24.242 7/9/2010 14:04:00  | 23.0 5/18/2010 20:56:01 | 25.929 |
| 5/17/2010 23:07:01 | 24.242 7/9/2010 14:39:00  | 23.0 5/18/2010 21:16:01 | 25.929 |
| 5/17/2010 23:27:01 | 24.242 7/9/2010 15:14:00  | 23.0 5/18/2010 21:36:01 | 25.992 |
| 5/17/2010 23:47:01 | 24.242 7/9/2010 15:49:00  | 23.0 5/18/2010 21:56:01 | 25.992 |
| 5/18/2010 00:07:01 | 24.179 7/9/2010 16:24:00  | 23.5 5/18/2010 22:16:01 | 25.992 |
| 5/18/2010 00:27:01 | 24.179 7/9/2010 16:59:00  | 23.5 5/18/2010 22:36:01 | 25.992 |
| 5/18/2010 00:47:01 | 24.179 7/9/2010 17:34:00  | 23.5 5/18/2010 22:56:01 | 25.992 |
| 5/18/2010 01:07:01 | 24.179 7/9/2010 18:09:00  | 23.5 5/18/2010 23:16:01 | 26.054 |
| 5/18/2010 01:27:01 | 24.179 7/9/2010 18:44:00  | 23.5 5/18/2010 23:36:01 | 26.054 |
| 5/18/2010 01:47:01 | 24.117 7/9/2010 19:19:00  | 23.5 5/18/2010 23:56:01 | 26.054 |
| 5/18/2010 02:07:01 | 24.117 7/9/2010 19:54:00  | 23.5 5/19/2010 00:16:01 | 26.054 |
| 5/18/2010 02:27:01 | 24.117 7/9/2010 20:29:00  | 23.5 5/19/2010 00:36:01 | 26.054 |
| 5/18/2010 02:47:01 | 24.117 7/9/2010 21:04:00  | 23.5 5/19/2010 00:56:01 | 26.117 |
| 5/18/2010 03:07:01 | 24.117 7/9/2010 21:39:00  | 23.5 5/19/2010 01:16:01 | 26.117 |
| 5/18/2010 03:27:01 | 24.054 7/9/2010 22:14:00  | 23.5 5/19/2010 01:36:01 | 26.117 |
| 5/18/2010 03:47:01 | 24.054 7/9/2010 22:49:00  | 23.5 5/19/2010 01:56:01 | 26.117 |
| 5/18/2010 04:07:01 | 24.054 7/9/2010 23:24:00  | 23.5 5/19/2010 02:16:01 | 26.117 |
| 5/18/2010 04:27:01 | 24.054 7/9/2010 23:59:00  | 23.5 5/19/2010 02:36:01 | 26.117 |
| 5/18/2010 04:47:01 | 24.054 7/10/2010 00:34:00 | 23.5 5/19/2010 02:56:01 | 26.117 |
| 5/18/2010 05:07:01 | 23.992 7/10/2010 01:09:00 | 23.5 5/19/2010 03:16:01 | 26.117 |
| 5/18/2010 05:27:01 | 23.992 7/10/2010 01:44:00 | 23.5 5/19/2010 03:36:01 | 26.117 |
| 5/18/2010 05:47:01 | 23.992 7/10/2010 02:19:00 | 23.5 5/19/2010 03:56:01 | 26.117 |
| 5/18/2010 06:07:01 | 23.992 7/10/2010 02:54:00 | 23.5 5/19/2010 04:16:01 | 26.117 |
| 5/18/2010 06:27:01 | 23.992 7/10/2010 03:29:00 | 23.5 5/19/2010 04:36:01 | 26.117 |
| 5/18/2010 06:47:01 | 23.992 7/10/2010 04:04:00 | 23.5 5/19/2010 04:56:01 | 26.117 |
| 5/18/2010 07:07:01 | 23.992 7/10/2010 04:39:00 | 23.5 5/19/2010 05:16:01 | 26.117 |
| 5/18/2010 07:27:01 | 23.992 7/10/2010 05:14:00 | 23.5 5/19/2010 05:36:01 | 26.117 |

|                    |        |                    |      |                    |        |
|--------------------|--------|--------------------|------|--------------------|--------|
| 5/18/2010 07:47:01 | 23.929 | 7/10/2010 05:49:00 | 23.5 | 5/19/2010 05:56:01 | 26.117 |
| 5/18/2010 08:07:01 | 23.929 | 7/10/2010 06:24:00 | 23.5 | 5/19/2010 06:16:01 | 26.117 |
| 5/18/2010 08:27:01 | 23.929 | 7/10/2010 06:59:00 | 23.5 | 5/19/2010 06:36:01 | 26.117 |
| 5/18/2010 08:47:01 | 23.929 | 7/10/2010 07:34:00 | 23.5 | 5/19/2010 06:56:01 | 26.117 |
| 5/18/2010 09:07:01 | 23.929 | 7/10/2010 08:09:00 | 23.5 | 5/19/2010 07:16:01 | 26.117 |
| 5/18/2010 09:27:01 | 23.929 | 7/10/2010 08:44:00 | 23.0 | 5/19/2010 07:36:01 | 26.117 |
| 5/18/2010 09:47:01 | 23.929 | 7/10/2010 09:19:00 | 23.0 | 5/19/2010 07:56:01 | 26.117 |
| 5/18/2010 10:07:01 | 23.867 | 7/10/2010 09:54:00 | 23.0 | 5/19/2010 08:16:01 | 26.054 |
| 5/18/2010 10:27:01 | 23.867 | 7/10/2010 10:29:00 | 23.0 | 5/19/2010 08:36:01 | 26.054 |
| 5/18/2010 10:47:01 | 23.867 | 7/10/2010 11:04:00 | 23.0 | 5/19/2010 08:56:01 | 26.054 |
| 5/18/2010 11:07:01 | 23.867 | 7/10/2010 11:39:00 | 23.0 | 5/19/2010 09:16:01 | 26.054 |
| 5/18/2010 11:27:01 | 23.867 | 7/10/2010 12:14:00 | 23.0 | 5/19/2010 09:36:01 | 26.054 |
| 5/18/2010 11:47:01 | 23.867 | 7/10/2010 12:49:00 | 23.0 | 5/19/2010 09:56:01 | 26.054 |
| 5/18/2010 12:07:01 | 23.867 | 7/10/2010 13:24:00 | 23.0 | 5/19/2010 10:16:01 | 26.054 |
| 5/18/2010 12:27:01 | 23.929 | 7/10/2010 13:59:00 | 23.0 | 5/19/2010 10:36:01 | 26.054 |
| 5/18/2010 12:47:01 | 23.929 | 7/10/2010 14:34:00 | 23.0 | 5/19/2010 10:56:01 | 26.054 |
| 5/18/2010 13:07:01 | 23.929 | 7/10/2010 15:09:00 | 23.5 | 5/19/2010 11:16:01 | 25.992 |
| 5/18/2010 13:27:01 | 23.929 | 7/10/2010 15:44:00 | 23.5 | 5/19/2010 11:36:01 | 25.992 |
| 5/18/2010 13:47:01 | 23.929 | 7/10/2010 16:19:00 | 23.5 | 5/19/2010 11:56:01 | 25.992 |
| 5/18/2010 14:07:01 | 23.992 | 7/10/2010 16:54:00 | 23.5 | 5/19/2010 12:16:01 | 25.992 |
| 5/18/2010 14:27:01 | 23.992 | 7/10/2010 17:29:00 | 23.5 | 5/19/2010 12:36:01 | 25.992 |
| 5/18/2010 14:47:01 | 24.054 | 7/10/2010 18:04:00 | 23.5 | 5/19/2010 12:56:01 | 25.992 |
| 5/18/2010 15:07:01 | 24.054 | 7/10/2010 18:39:00 | 23.5 | 5/19/2010 13:16:01 | 25.992 |
| 5/18/2010 15:27:01 | 24.117 | 7/10/2010 19:14:00 | 23.5 | 5/19/2010 13:36:01 | 25.992 |
| 5/18/2010 15:47:01 | 24.179 | 7/10/2010 19:49:00 | 23.5 | 5/19/2010 13:56:01 | 25.992 |
| 5/18/2010 16:07:01 | 24.179 | 7/10/2010 20:24:00 | 23.5 | 5/19/2010 14:16:01 | 25.992 |
| 5/18/2010 16:27:01 | 24.242 | 7/10/2010 20:59:00 | 23.5 | 5/19/2010 14:36:01 | 25.992 |
| 5/18/2010 16:47:01 | 24.304 | 7/10/2010 21:34:00 | 23.5 | 5/19/2010 14:56:01 | 25.992 |
| 5/18/2010 17:07:01 | 24.304 | 7/10/2010 22:09:00 | 23.5 | 5/19/2010 15:16:01 | 25.992 |
| 5/18/2010 17:27:01 | 24.367 | 7/10/2010 22:44:00 | 23.5 | 5/19/2010 15:36:01 | 25.992 |
| 5/18/2010 17:47:01 | 24.429 | 7/10/2010 23:19:00 | 23.5 | 5/19/2010 15:56:01 | 25.992 |
| 5/18/2010 18:07:01 | 24.429 | 7/10/2010 23:54:00 | 23.5 | 5/19/2010 16:16:01 | 25.992 |
| 5/18/2010 18:27:01 | 24.492 | 7/11/2010 00:29:00 | 23.5 | 5/19/2010 16:36:01 | 25.992 |
| 5/18/2010 18:47:01 | 24.492 | 7/11/2010 01:04:00 | 23.5 | 5/19/2010 16:56:01 | 25.992 |
| 5/18/2010 19:07:01 | 24.492 | 7/11/2010 01:39:00 | 23.5 | 5/19/2010 17:16:01 | 25.992 |
| 5/18/2010 19:27:01 | 24.554 | 7/11/2010 02:14:00 | 23.5 | 5/19/2010 17:36:01 | 26.054 |
| 5/18/2010 19:47:01 | 24.554 | 7/11/2010 02:49:00 | 23.0 | 5/19/2010 17:56:01 | 26.054 |
| 5/18/2010 20:07:01 | 24.554 | 7/11/2010 03:24:00 | 23.0 | 5/19/2010 18:16:01 | 26.054 |
| 5/18/2010 20:27:01 | 24.617 | 7/11/2010 03:59:00 | 23.0 | 5/19/2010 18:36:01 | 26.117 |
| 5/18/2010 20:47:01 | 24.617 | 7/11/2010 04:34:00 | 23.0 | 5/19/2010 18:56:01 | 26.117 |
| 5/18/2010 21:07:01 | 24.617 | 7/11/2010 05:09:00 | 23.0 | 5/19/2010 19:16:01 | 26.117 |
| 5/18/2010 21:27:01 | 24.617 | 7/11/2010 05:44:00 | 23.0 | 5/19/2010 19:36:01 | 26.117 |
| 5/18/2010 21:47:01 | 24.617 | 7/11/2010 06:19:00 | 23.0 | 5/19/2010 19:56:01 | 26.179 |
| 5/18/2010 22:07:01 | 24.617 | 7/11/2010 06:54:00 | 23.0 | 5/19/2010 20:16:01 | 26.179 |
| 5/18/2010 22:27:01 | 24.679 | 7/11/2010 07:29:00 | 23.0 | 5/19/2010 20:36:01 | 26.179 |
| 5/18/2010 22:47:01 | 24.679 | 7/11/2010 08:04:00 | 23.0 | 5/19/2010 20:56:01 | 26.179 |
| 5/18/2010 23:07:01 | 24.679 | 7/11/2010 08:39:00 | 23.0 | 5/19/2010 21:16:01 | 26.242 |
| 5/18/2010 23:27:01 | 24.679 | 7/11/2010 09:14:00 | 22.5 | 5/19/2010 21:36:01 | 26.242 |
| 5/18/2010 23:47:01 | 24.679 | 7/11/2010 09:49:00 | 22.5 | 5/19/2010 21:56:01 | 26.242 |
| 5/19/2010 00:07:01 | 24.679 | 7/11/2010 10:24:00 | 22.5 | 5/19/2010 22:16:01 | 26.304 |

|                    |        |                    |      |                    |        |
|--------------------|--------|--------------------|------|--------------------|--------|
| 5/19/2010 00:27:01 | 24.617 | 7/11/2010 10:59:00 | 22.5 | 5/19/2010 22:36:01 | 26.304 |
| 5/19/2010 00:47:01 | 24.617 | 7/11/2010 11:34:00 | 22.5 | 5/19/2010 22:56:01 | 26.304 |
| 5/19/2010 01:07:01 | 24.617 | 7/11/2010 12:09:00 | 22.5 | 5/19/2010 23:16:01 | 26.304 |
| 5/19/2010 01:27:01 | 24.617 | 7/11/2010 12:44:00 | 22.5 | 5/19/2010 23:36:01 | 26.304 |
| 5/19/2010 01:47:01 | 24.617 | 7/11/2010 13:19:00 | 22.5 | 5/19/2010 23:56:01 | 26.367 |
| 5/19/2010 02:07:01 | 24.617 | 7/11/2010 13:54:00 | 22.5 | 5/20/2010 00:16:01 | 26.367 |
| 5/19/2010 02:27:01 | 24.617 | 7/11/2010 14:29:00 | 23.0 | 5/20/2010 00:36:01 | 26.367 |
| 5/19/2010 02:47:01 | 24.554 | 7/11/2010 15:04:00 | 23.0 | 5/20/2010 00:56:01 | 26.367 |
| 5/19/2010 03:07:01 | 24.554 | 7/11/2010 15:39:00 | 23.0 | 5/20/2010 01:16:01 | 26.367 |
| 5/19/2010 03:27:01 | 24.554 | 7/11/2010 16:14:00 | 23.0 | 5/20/2010 01:36:01 | 26.367 |
| 5/19/2010 03:47:01 | 24.554 | 7/11/2010 16:49:00 | 23.0 | 5/20/2010 01:56:01 | 26.367 |
| 5/19/2010 04:07:01 | 24.554 | 7/11/2010 17:24:00 | 23.0 | 5/20/2010 02:16:01 | 26.367 |
| 5/19/2010 04:27:01 | 24.554 | 7/11/2010 17:59:00 | 23.0 | 5/20/2010 02:36:01 | 26.367 |
| 5/19/2010 04:47:01 | 24.492 | 7/11/2010 18:34:00 | 23.0 | 5/20/2010 02:56:01 | 26.367 |
| 5/19/2010 05:07:01 | 24.492 | 7/11/2010 19:09:00 | 23.0 | 5/20/2010 03:16:01 | 26.367 |
| 5/19/2010 05:27:01 | 24.492 | 7/11/2010 19:44:00 | 23.0 | 5/20/2010 03:36:01 | 26.367 |
| 5/19/2010 05:47:01 | 24.492 | 7/11/2010 20:19:00 | 23.5 | 5/20/2010 03:56:01 | 26.367 |
| 5/19/2010 06:07:01 | 24.492 | 7/11/2010 20:54:00 | 23.5 | 5/20/2010 04:16:01 | 26.367 |
| 5/19/2010 06:27:01 | 24.429 | 7/11/2010 21:29:00 | 23.5 | 5/20/2010 04:36:01 | 26.367 |
| 5/19/2010 06:47:01 | 24.429 | 7/11/2010 22:04:00 | 23.5 | 5/20/2010 04:56:01 | 26.367 |
| 5/19/2010 07:07:01 | 24.429 | 7/11/2010 22:39:00 | 23.0 | 5/20/2010 05:16:01 | 26.367 |
| 5/19/2010 07:27:01 | 24.429 | 7/11/2010 23:14:00 | 23.0 | 5/20/2010 05:36:01 | 26.367 |
| 5/19/2010 07:47:01 | 24.429 | 7/11/2010 23:49:00 | 23.0 | 5/20/2010 05:56:01 | 26.367 |
| 5/19/2010 08:07:01 | 24.367 | 7/12/2010 00:24:00 | 23.0 | 5/20/2010 06:16:01 | 26.367 |
| 5/19/2010 08:27:01 | 24.367 | 7/12/2010 00:59:00 | 23.0 | 5/20/2010 06:36:01 | 26.367 |
| 5/19/2010 08:47:01 | 24.367 | 7/12/2010 01:34:00 | 23.0 | 5/20/2010 06:56:01 | 26.367 |
| 5/19/2010 09:07:01 | 24.304 | 7/12/2010 02:09:00 | 23.0 | 5/20/2010 07:16:01 | 26.367 |
| 5/19/2010 09:27:01 | 24.304 | 7/12/2010 02:44:00 | 23.0 | 5/20/2010 07:36:01 | 26.367 |
| 5/19/2010 09:47:01 | 24.304 | 7/12/2010 03:19:00 | 23.0 | 5/20/2010 07:56:01 | 26.367 |
| 5/19/2010 10:07:01 | 24.304 | 7/12/2010 03:54:00 | 23.0 | 5/20/2010 08:16:01 | 26.367 |
| 5/19/2010 10:27:01 | 24.304 | 7/12/2010 04:29:00 | 23.0 | 5/20/2010 08:36:01 | 26.304 |
| 5/19/2010 10:47:01 | 24.304 | 7/12/2010 05:04:00 | 23.0 | 5/20/2010 08:56:01 | 26.304 |
| 5/19/2010 11:07:01 | 24.242 | 7/12/2010 05:39:00 | 23.0 | 5/20/2010 09:16:01 | 26.304 |
| 5/19/2010 11:27:01 | 24.242 | 7/12/2010 06:14:00 | 23.0 | 5/20/2010 09:36:01 | 26.304 |
| 5/19/2010 11:47:01 | 24.242 | 7/12/2010 06:49:00 | 22.5 | 5/20/2010 09:56:01 | 26.304 |
| 5/19/2010 12:07:01 | 24.242 | 7/12/2010 07:24:00 | 22.5 | 5/20/2010 10:16:01 | 26.304 |
| 5/19/2010 12:27:01 | 24.242 | 7/12/2010 07:59:00 | 22.5 | 5/20/2010 10:36:01 | 26.304 |
| 5/19/2010 12:47:01 | 24.304 | 7/12/2010 08:34:00 | 22.5 | 5/20/2010 10:56:01 | 26.304 |
| 5/19/2010 13:07:01 | 24.304 | 7/12/2010 09:09:00 | 22.5 | 5/20/2010 11:16:01 | 26.304 |
| 5/19/2010 13:27:01 | 24.304 | 7/12/2010 09:44:00 | 22.5 | 5/20/2010 11:36:01 | 26.242 |
| 5/19/2010 13:47:01 | 24.304 | 7/12/2010 10:19:00 | 22.5 | 5/20/2010 11:56:01 | 26.242 |
| 5/19/2010 14:07:01 | 24.367 | 7/12/2010 10:54:00 | 22.5 | 5/20/2010 12:16:01 | 26.242 |
| 5/19/2010 14:27:01 | 24.367 | 7/12/2010 11:29:00 | 22.5 | 5/20/2010 12:36:01 | 26.242 |
| 5/19/2010 14:47:01 | 24.429 | 7/12/2010 12:04:00 | 22.5 | 5/20/2010 12:56:01 | 26.242 |
| 5/19/2010 15:07:01 | 24.429 | 7/12/2010 12:39:00 | 22.5 | 5/20/2010 13:16:01 | 26.242 |
| 5/19/2010 15:27:01 | 24.492 | 7/12/2010 13:14:00 | 22.5 | 5/20/2010 13:36:01 | 26.242 |
| 5/19/2010 15:47:01 | 24.492 | 7/12/2010 13:49:00 | 22.5 | 5/20/2010 13:56:01 | 26.242 |
| 5/19/2010 16:07:01 | 24.554 | 7/12/2010 14:24:00 | 22.5 | 5/20/2010 14:16:01 | 26.242 |
| 5/19/2010 16:27:01 | 24.617 | 7/12/2010 14:59:00 | 23.0 | 5/20/2010 14:36:01 | 26.242 |
| 5/19/2010 16:47:01 | 24.617 | 7/12/2010 15:34:00 | 23.0 | 5/20/2010 14:56:01 | 26.242 |

|                    |        |                    |      |                    |        |
|--------------------|--------|--------------------|------|--------------------|--------|
| 5/19/2010 17:07:01 | 24.679 | 7/12/2010 16:09:00 | 23.0 | 5/20/2010 15:16:01 | 26.242 |
| 5/19/2010 17:27:01 | 24.742 | 7/12/2010 16:44:00 | 23.0 | 5/20/2010 15:36:01 | 26.242 |
| 5/19/2010 17:47:01 | 24.742 | 7/12/2010 17:19:00 | 23.0 | 5/20/2010 15:56:01 | 26.242 |
| 5/19/2010 18:07:01 | 24.804 | 7/12/2010 17:54:00 | 23.0 | 5/20/2010 16:16:01 | 26.242 |
| 5/19/2010 18:27:01 | 24.804 | 7/12/2010 18:29:00 | 23.0 | 5/20/2010 16:36:01 | 26.242 |
| 5/19/2010 18:47:01 | 24.867 | 7/12/2010 19:04:00 | 23.0 | 5/20/2010 16:56:01 | 26.304 |
| 5/19/2010 19:07:01 | 24.867 | 7/12/2010 19:39:00 | 23.0 | 5/20/2010 17:16:01 | 26.304 |
| 5/19/2010 19:27:01 | 24.867 | 7/12/2010 20:14:00 | 23.0 | 5/20/2010 17:36:01 | 26.304 |
| 5/19/2010 19:47:01 | 24.929 | 7/12/2010 20:49:00 | 23.0 | 5/20/2010 17:56:01 | 26.304 |
| 5/19/2010 20:07:01 | 24.929 | 7/12/2010 21:24:00 | 23.0 | 5/20/2010 18:16:01 | 26.367 |
| 5/19/2010 20:27:01 | 24.929 | 7/12/2010 21:59:00 | 23.0 | 5/20/2010 18:36:01 | 26.367 |
| 5/19/2010 20:47:01 | 24.929 | 7/12/2010 22:34:00 | 23.0 | 5/20/2010 18:56:01 | 26.367 |
| 5/19/2010 21:07:01 | 24.929 | 7/12/2010 23:09:00 | 23.0 | 5/20/2010 19:16:01 | 26.367 |
| 5/19/2010 21:27:01 | 24.929 | 7/12/2010 23:44:00 | 23.0 | 5/20/2010 19:36:01 | 26.429 |
| 5/19/2010 21:47:01 | 24.929 | 7/13/2010 00:19:00 | 23.0 | 5/20/2010 19:56:01 | 26.429 |
| 5/19/2010 22:07:01 | 24.929 | 7/13/2010 00:54:00 | 23.0 | 5/20/2010 20:16:01 | 26.429 |
| 5/19/2010 22:27:01 | 24.929 | 7/13/2010 01:29:00 | 23.0 | 5/20/2010 20:36:01 | 26.429 |
| 5/19/2010 22:47:01 | 24.929 | 7/13/2010 02:04:00 | 23.0 | 5/20/2010 20:56:01 | 26.492 |
| 5/19/2010 23:07:01 | 24.929 | 7/13/2010 02:39:00 | 23.0 | 5/20/2010 21:16:01 | 26.492 |
| 5/19/2010 23:27:01 | 24.929 | 7/13/2010 03:14:00 | 23.0 | 5/20/2010 21:36:01 | 26.492 |
| 5/19/2010 23:47:01 | 24.929 | 7/13/2010 03:49:00 | 22.5 | 5/20/2010 21:56:01 | 26.492 |
| 5/20/2010 00:07:01 | 24.929 | 7/13/2010 04:24:00 | 22.5 | 5/20/2010 22:16:01 | 26.554 |
| 5/20/2010 00:27:01 | 24.867 | 7/13/2010 04:59:00 | 22.5 | 5/20/2010 22:36:01 | 26.554 |
| 5/20/2010 00:47:01 | 24.867 | 7/13/2010 05:34:00 | 22.5 | 5/20/2010 22:56:01 | 26.554 |
| 5/20/2010 01:07:01 | 24.867 | 7/13/2010 06:09:00 | 22.5 | 5/20/2010 23:16:01 | 26.554 |
| 5/20/2010 01:27:01 | 24.867 | 7/13/2010 06:44:00 | 22.5 | 5/20/2010 23:36:01 | 26.554 |
| 5/20/2010 01:47:01 | 24.867 | 7/13/2010 07:19:00 | 22.5 | 5/20/2010 23:56:01 | 26.554 |
| 5/20/2010 02:07:01 | 24.867 | 7/13/2010 07:54:00 | 22.5 | 5/21/2010 00:16:01 | 26.617 |
| 5/20/2010 02:27:01 | 24.804 | 7/13/2010 08:29:00 | 22.5 | 5/21/2010 00:36:01 | 26.617 |
| 5/20/2010 02:47:01 | 24.804 | 7/13/2010 09:04:00 | 22.5 | 5/21/2010 00:56:01 | 26.617 |
| 5/20/2010 03:07:01 | 24.804 | 7/13/2010 09:39:00 | 22.5 | 5/21/2010 01:16:01 | 26.617 |
| 5/20/2010 03:27:01 | 24.804 | 7/13/2010 10:14:00 | 22.5 | 5/21/2010 01:36:01 | 26.617 |
| 5/20/2010 03:47:01 | 24.804 | 7/13/2010 10:49:00 | 22.5 | 5/21/2010 01:56:01 | 26.617 |
| 5/20/2010 04:07:01 | 24.804 | 7/13/2010 11:24:00 | 22.5 | 5/21/2010 02:16:01 | 26.617 |
| 5/20/2010 04:27:01 | 24.804 | 7/13/2010 11:59:00 | 22.5 | 5/21/2010 02:36:01 | 26.617 |
| 5/20/2010 04:47:01 | 24.742 | 7/13/2010 12:34:00 | 22.5 | 5/21/2010 02:56:01 | 26.617 |
| 5/20/2010 05:07:01 | 24.742 | 7/13/2010 13:09:00 | 22.5 | 5/21/2010 03:16:01 | 26.617 |
| 5/20/2010 05:27:01 | 24.742 | 7/13/2010 13:44:00 | 22.5 | 5/21/2010 03:36:01 | 26.617 |
| 5/20/2010 05:47:01 | 24.742 | 7/13/2010 14:19:00 | 22.5 | 5/21/2010 03:56:01 | 26.617 |
| 5/20/2010 06:07:01 | 24.742 | 7/13/2010 14:54:00 | 22.5 | 5/21/2010 04:16:01 | 26.617 |
| 5/20/2010 06:27:01 | 24.679 | 7/13/2010 15:29:00 | 22.5 | 5/21/2010 04:36:01 | 26.617 |
| 5/20/2010 06:47:01 | 24.679 | 7/13/2010 16:04:00 | 22.5 | 5/21/2010 04:56:01 | 26.617 |
| 5/20/2010 07:07:01 | 24.679 | 7/13/2010 16:39:00 | 23.0 | 5/21/2010 05:16:01 | 26.617 |
| 5/20/2010 07:27:01 | 24.679 | 7/13/2010 17:14:00 | 23.0 | 5/21/2010 05:36:01 | 26.554 |
| 5/20/2010 07:47:01 | 24.679 | 7/13/2010 17:49:00 | 23.0 | 5/21/2010 05:56:01 | 26.554 |
| 5/20/2010 08:07:01 | 24.679 | 7/13/2010 18:24:00 | 23.0 | 5/21/2010 06:16:01 | 26.554 |
| 5/20/2010 08:27:01 | 24.617 | 7/13/2010 18:59:00 | 23.0 | 5/21/2010 06:36:01 | 26.554 |
| 5/20/2010 08:47:01 | 24.617 | 7/13/2010 19:34:00 | 23.0 | 5/21/2010 06:56:01 | 26.554 |
| 5/20/2010 09:07:01 | 24.617 | 7/13/2010 20:09:00 | 23.0 | 5/21/2010 07:16:01 | 26.554 |
| 5/20/2010 09:27:01 | 24.617 | 7/13/2010 20:44:00 | 23.0 | 5/21/2010 07:36:01 | 26.554 |

|                    |        |                    |      |                    |        |
|--------------------|--------|--------------------|------|--------------------|--------|
| 5/20/2010 09:47:01 | 24.617 | 7/13/2010 21:19:00 | 23.0 | 5/21/2010 07:56:01 | 26.492 |
| 5/20/2010 10:07:01 | 24.554 | 7/13/2010 21:54:00 | 23.0 | 5/21/2010 08:16:01 | 26.492 |
| 5/20/2010 10:27:01 | 24.554 | 7/13/2010 22:29:00 | 23.0 | 5/21/2010 08:36:01 | 26.492 |
| 5/20/2010 10:47:01 | 24.554 | 7/13/2010 23:04:00 | 23.0 | 5/21/2010 08:56:01 | 26.492 |
| 5/20/2010 11:07:01 | 24.554 | 7/13/2010 23:39:00 | 23.0 | 5/21/2010 09:16:01 | 26.492 |
| 5/20/2010 11:27:01 | 24.554 | 7/14/2010 00:14:00 | 23.0 | 5/21/2010 09:36:01 | 26.492 |
| 5/20/2010 11:47:01 | 24.554 | 7/14/2010 00:49:00 | 23.0 | 5/21/2010 09:56:01 | 26.429 |
| 5/20/2010 12:07:01 | 24.554 | 7/14/2010 01:24:00 | 23.0 | 5/21/2010 10:16:01 | 26.429 |
| 5/20/2010 12:27:01 | 24.554 | 7/14/2010 01:59:00 | 23.0 | 5/21/2010 10:36:01 | 26.429 |
| 5/20/2010 12:47:01 | 24.554 | 7/14/2010 02:34:00 | 23.0 | 5/21/2010 10:56:01 | 26.429 |
| 5/20/2010 13:07:01 | 24.617 | 7/14/2010 03:09:00 | 23.0 | 5/21/2010 11:16:01 | 26.429 |
| 5/20/2010 13:27:01 | 24.617 | 7/14/2010 03:44:00 | 23.0 | 5/21/2010 11:36:01 | 26.429 |
| 5/20/2010 13:47:01 | 24.617 | 7/14/2010 04:19:00 | 23.0 | 5/21/2010 11:56:01 | 26.367 |
| 5/20/2010 14:07:01 | 24.679 | 7/14/2010 04:54:00 | 23.0 | 5/21/2010 12:16:01 | 26.367 |
| 5/20/2010 14:27:01 | 24.679 | 7/14/2010 05:29:00 | 23.0 | 5/21/2010 12:36:01 | 26.367 |
| 5/20/2010 14:47:01 | 24.742 | 7/14/2010 06:04:00 | 23.0 | 5/21/2010 12:56:01 | 26.367 |
| 5/20/2010 15:07:01 | 24.742 | 7/14/2010 06:39:00 | 23.0 | 5/21/2010 13:16:01 | 26.367 |
| 5/20/2010 15:27:01 | 24.804 | 7/14/2010 07:14:00 | 23.0 | 5/21/2010 13:36:01 | 26.367 |
| 5/20/2010 15:47:01 | 24.804 | 7/14/2010 07:49:00 | 23.0 | 5/21/2010 13:56:01 | 26.304 |
| 5/20/2010 16:07:01 | 24.867 | 7/14/2010 08:24:00 | 23.0 | 5/21/2010 14:16:01 | 26.304 |
| 5/20/2010 16:27:01 | 24.867 | 7/14/2010 08:59:00 | 23.0 | 5/21/2010 14:36:01 | 26.304 |
| 5/20/2010 16:47:01 | 24.929 | 7/14/2010 09:34:00 | 23.0 | 5/21/2010 14:56:01 | 26.304 |
| 5/20/2010 17:07:01 | 24.929 | 7/14/2010 10:09:00 | 22.5 | 5/21/2010 15:16:01 | 26.304 |
| 5/20/2010 17:27:01 | 24.992 | 7/14/2010 10:44:00 | 23.0 | 5/21/2010 15:36:01 | 26.304 |
| 5/20/2010 17:47:01 | 25.054 | 7/14/2010 11:19:00 | 23.0 | 5/21/2010 15:56:01 | 26.304 |
| 5/20/2010 18:07:01 | 25.054 | 7/14/2010 11:54:00 | 23.0 | 5/21/2010 16:16:01 | 26.304 |
| 5/20/2010 18:27:01 | 25.117 | 7/14/2010 12:29:00 | 23.0 | 5/21/2010 16:36:01 | 26.367 |
| 5/20/2010 18:47:01 | 25.117 | 7/14/2010 13:04:00 | 23.0 | 5/21/2010 16:56:01 | 26.367 |
| 5/20/2010 19:07:01 | 25.117 | 7/14/2010 13:39:00 | 23.0 | 5/21/2010 17:16:01 | 26.367 |
| 5/20/2010 19:27:01 | 25.117 | 7/14/2010 14:14:00 | 23.0 | 5/21/2010 17:36:01 | 26.367 |
| 5/20/2010 19:47:01 | 25.179 | 7/14/2010 14:49:00 | 23.0 | 5/21/2010 17:56:01 | 26.367 |
| 5/20/2010 20:07:01 | 25.179 | 7/14/2010 15:24:00 | 23.0 | 5/21/2010 18:16:01 | 26.367 |
| 5/20/2010 20:27:01 | 25.179 | 7/14/2010 15:59:00 | 23.0 | 5/21/2010 18:36:01 | 26.367 |
| 5/20/2010 20:47:01 | 25.179 | 7/14/2010 16:34:00 | 23.0 | 5/21/2010 18:56:01 | 26.429 |
| 5/20/2010 21:07:01 | 25.242 | 7/14/2010 17:09:00 | 23.0 | 5/21/2010 19:16:01 | 26.429 |
| 5/20/2010 21:27:01 | 25.242 | 7/14/2010 17:44:00 | 23.0 | 5/21/2010 19:36:01 | 26.429 |
| 5/20/2010 21:47:01 | 25.242 | 7/14/2010 18:19:00 | 23.0 | 5/21/2010 19:56:01 | 26.429 |
| 5/20/2010 22:07:01 | 25.242 | 7/14/2010 18:54:00 | 23.0 | 5/21/2010 20:16:01 | 26.492 |
| 5/20/2010 22:27:01 | 25.242 | 7/14/2010 19:29:00 | 23.5 | 5/21/2010 20:36:01 | 26.492 |
| 5/20/2010 22:47:01 | 25.242 | 7/14/2010 20:04:00 | 23.5 | 5/21/2010 20:56:01 | 26.492 |
| 5/20/2010 23:07:01 | 25.242 | 7/14/2010 20:39:00 | 23.5 | 5/21/2010 21:16:01 | 26.492 |
| 5/20/2010 23:27:01 | 25.179 | 7/14/2010 21:14:00 | 23.5 | 5/21/2010 21:36:01 | 26.554 |
| 5/20/2010 23:47:01 | 25.179 | 7/14/2010 21:49:00 | 23.5 | 5/21/2010 21:56:01 | 26.554 |
| 5/21/2010 00:07:01 | 25.179 | 7/14/2010 22:24:00 | 23.5 | 5/21/2010 22:16:01 | 26.554 |
| 5/21/2010 00:27:01 | 25.179 | 7/14/2010 22:59:00 | 23.5 | 5/21/2010 22:36:01 | 26.554 |
| 5/21/2010 00:47:01 | 25.179 | 7/14/2010 23:34:00 | 23.0 | 5/21/2010 22:56:01 | 26.554 |
| 5/21/2010 01:07:01 | 25.179 | 7/15/2010 00:09:00 | 23.0 | 5/21/2010 23:16:01 | 26.617 |
| 5/21/2010 01:27:01 | 25.179 | 7/15/2010 00:44:00 | 23.0 | 5/21/2010 23:36:01 | 26.617 |
| 5/21/2010 01:47:01 | 25.179 | 7/15/2010 01:19:00 | 23.0 | 5/21/2010 23:56:01 | 26.617 |
| 5/21/2010 02:07:01 | 25.117 | 7/15/2010 01:54:00 | 23.0 | 5/22/2010 00:16:01 | 26.617 |

|                    |        |                    |      |                    |        |
|--------------------|--------|--------------------|------|--------------------|--------|
| 5/21/2010 02:27:01 | 25.117 | 7/15/2010 02:29:00 | 23.0 | 5/22/2010 00:36:01 | 26.617 |
| 5/21/2010 02:47:01 | 25.117 | 7/15/2010 03:04:00 | 23.0 | 5/22/2010 00:56:01 | 26.617 |
| 5/21/2010 03:07:01 | 25.117 | 7/15/2010 03:39:00 | 23.0 | 5/22/2010 01:16:01 | 26.679 |
| 5/21/2010 03:27:01 | 25.054 | 7/15/2010 04:14:00 | 23.0 | 5/22/2010 01:36:01 | 26.679 |
| 5/21/2010 03:47:01 | 25.054 | 7/15/2010 04:49:00 | 23.0 | 5/22/2010 01:56:01 | 26.679 |
| 5/21/2010 04:07:01 | 25.054 | 7/15/2010 05:24:00 | 23.0 | 5/22/2010 02:16:01 | 26.679 |
| 5/21/2010 04:27:01 | 24.992 | 7/15/2010 05:59:00 | 22.5 | 5/22/2010 02:36:01 | 26.679 |
| 5/21/2010 04:47:01 | 24.992 | 7/15/2010 06:34:00 | 22.5 | 5/22/2010 02:56:01 | 26.679 |
| 5/21/2010 05:07:01 | 24.992 | 7/15/2010 07:09:00 | 22.5 | 5/22/2010 03:16:01 | 26.679 |
| 5/21/2010 05:27:01 | 24.992 | 7/15/2010 07:44:00 | 22.5 | 5/22/2010 03:36:01 | 26.679 |
| 5/21/2010 05:47:01 | 24.929 | 7/15/2010 08:19:00 | 22.5 | 5/22/2010 03:56:01 | 26.679 |
| 5/21/2010 06:07:01 | 24.929 | 7/15/2010 08:54:00 | 22.5 | 5/22/2010 04:16:01 | 26.679 |
| 5/21/2010 06:27:01 | 24.929 | 7/15/2010 09:29:00 | 22.5 | 5/22/2010 04:36:01 | 26.742 |
| 5/21/2010 06:47:01 | 24.867 | 7/15/2010 10:04:00 | 22.5 | 5/22/2010 04:56:01 | 26.742 |
| 5/21/2010 07:07:01 | 24.867 | 7/15/2010 10:39:00 | 22.5 | 5/22/2010 05:16:01 | 26.742 |
| 5/21/2010 07:27:01 | 24.867 | 7/15/2010 11:14:00 | 22.5 | 5/22/2010 05:36:01 | 26.742 |
| 5/21/2010 07:47:01 | 24.804 | 7/15/2010 11:49:00 | 22.5 | 5/22/2010 05:56:01 | 26.742 |
| 5/21/2010 08:07:01 | 24.804 | 7/15/2010 12:24:00 | 22.5 | 5/22/2010 06:16:01 | 26.679 |
| 5/21/2010 08:27:01 | 24.804 | 7/15/2010 12:59:00 | 22.5 | 5/22/2010 06:36:01 | 26.679 |
| 5/21/2010 08:47:01 | 24.742 | 7/15/2010 13:34:00 | 22.5 | 5/22/2010 06:56:01 | 26.679 |
| 5/21/2010 09:07:01 | 24.742 | 7/15/2010 14:09:00 | 22.5 | 5/22/2010 07:16:01 | 26.679 |
| 5/21/2010 09:27:01 | 24.742 | 7/15/2010 14:44:00 | 22.5 | 5/22/2010 07:36:01 | 26.679 |
| 5/21/2010 09:47:01 | 24.679 | 7/15/2010 15:19:00 | 22.5 | 5/22/2010 07:56:01 | 26.679 |
| 5/21/2010 10:07:01 | 24.679 | 7/15/2010 15:54:00 | 22.5 | 5/22/2010 08:16:01 | 26.617 |
| 5/21/2010 10:27:01 | 24.679 | 7/15/2010 16:29:00 | 22.5 | 5/22/2010 08:36:01 | 26.617 |
| 5/21/2010 10:47:01 | 24.679 | 7/15/2010 17:04:00 | 22.5 | 5/22/2010 08:56:01 | 26.617 |
| 5/21/2010 11:07:01 | 24.617 | 7/15/2010 17:39:00 | 23.0 | 5/22/2010 09:16:01 | 26.617 |
| 5/21/2010 11:27:01 | 24.617 | 7/15/2010 18:14:00 | 23.0 | 5/22/2010 09:36:01 | 26.554 |
| 5/21/2010 11:47:01 | 24.617 | 7/15/2010 18:49:00 | 23.0 | 5/22/2010 09:56:01 | 26.554 |
| 5/21/2010 12:07:01 | 24.617 | 7/15/2010 19:24:00 | 23.0 | 5/22/2010 10:16:01 | 26.554 |
| 5/21/2010 12:27:01 | 24.617 | 7/15/2010 19:59:00 | 23.0 | 5/22/2010 10:36:01 | 26.554 |
| 5/21/2010 12:47:01 | 24.617 | 7/15/2010 20:34:00 | 23.0 | 5/22/2010 10:56:01 | 26.492 |
| 5/21/2010 13:07:01 | 24.617 | 7/15/2010 21:09:00 | 23.0 | 5/22/2010 11:16:01 | 26.492 |
| 5/21/2010 13:27:01 | 24.679 | 7/15/2010 21:44:00 | 23.0 | 5/22/2010 11:36:01 | 26.492 |
| 5/21/2010 13:47:01 | 24.679 | 7/15/2010 22:19:00 | 23.0 | 5/22/2010 11:56:01 | 26.492 |
| 5/21/2010 14:07:01 | 24.679 | 7/15/2010 22:54:00 | 23.0 | 5/22/2010 12:16:01 | 26.429 |
| 5/21/2010 14:27:01 | 24.742 | 7/15/2010 23:29:00 | 23.0 | 5/22/2010 12:36:01 | 26.429 |
| 5/21/2010 14:47:01 | 24.742 | 7/16/2010 00:04:00 | 23.0 | 5/22/2010 12:56:01 | 26.429 |
| 5/21/2010 15:07:01 | 24.804 | 7/16/2010 00:39:00 | 23.0 | 5/22/2010 13:16:01 | 26.429 |
| 5/21/2010 15:27:01 | 24.804 | 7/16/2010 01:14:00 | 23.0 | 5/22/2010 13:36:01 | 26.367 |
| 5/21/2010 15:47:01 | 24.867 | 7/16/2010 01:49:00 | 23.0 | 5/22/2010 13:56:01 | 26.367 |
| 5/21/2010 16:07:01 | 24.867 | 7/16/2010 02:24:00 | 23.0 | 5/22/2010 14:16:01 | 26.367 |
| 5/21/2010 16:27:01 | 24.929 | 7/16/2010 02:59:00 | 23.0 | 5/22/2010 14:36:01 | 26.367 |
| 5/21/2010 16:47:01 | 24.992 | 7/16/2010 03:34:00 | 22.5 | 5/22/2010 14:56:01 | 26.367 |
| 5/21/2010 17:07:01 | 24.992 | 7/16/2010 04:09:00 | 22.5 | 5/22/2010 15:16:01 | 26.367 |
| 5/21/2010 17:27:01 | 25.054 | 7/16/2010 04:44:00 | 22.5 | 5/22/2010 15:36:01 | 26.367 |
| 5/21/2010 17:47:01 | 25.054 | 7/16/2010 05:19:00 | 22.5 | 5/22/2010 15:56:01 | 26.367 |
| 5/21/2010 18:07:01 | 25.117 | 7/16/2010 05:54:00 | 22.5 | 5/22/2010 16:16:01 | 26.367 |
| 5/21/2010 18:27:01 | 25.117 | 7/16/2010 06:29:00 | 22.5 | 5/22/2010 16:36:01 | 26.367 |
| 5/21/2010 18:47:01 | 25.179 | 7/16/2010 07:04:00 | 22.5 | 5/22/2010 16:56:01 | 26.367 |

|                    |                           |                         |        |
|--------------------|---------------------------|-------------------------|--------|
| 5/21/2010 19:07:01 | 25.179 7/16/2010 07:39:00 | 22.5 5/22/2010 17:16:01 | 26.367 |
| 5/21/2010 19:27:01 | 25.179 7/16/2010 08:14:00 | 22.5 5/22/2010 17:36:01 | 26.367 |
| 5/21/2010 19:47:01 | 25.242 7/16/2010 08:49:00 | 22.5 5/22/2010 17:56:01 | 26.367 |
| 5/21/2010 20:07:01 | 25.242 7/16/2010 09:24:00 | 22.5 5/22/2010 18:16:01 | 26.367 |
| 5/21/2010 20:27:01 | 25.242 7/16/2010 09:59:00 | 22.0 5/22/2010 18:36:01 | 26.367 |
| 5/21/2010 20:47:01 | 25.304 7/16/2010 10:34:00 | 22.0 5/22/2010 18:56:01 | 26.429 |
| 5/21/2010 21:07:01 | 25.304 7/16/2010 11:09:00 | 22.0 5/22/2010 19:16:01 | 26.429 |
| 5/21/2010 21:27:01 | 25.304 7/16/2010 11:44:00 | 22.0 5/22/2010 19:36:01 | 26.429 |
| 5/21/2010 21:47:01 | 25.304 7/16/2010 12:19:00 | 22.0 5/22/2010 19:56:01 | 26.429 |
| 5/21/2010 22:07:01 | 25.304 7/16/2010 12:54:00 | 22.0 5/22/2010 20:16:01 | 26.429 |
| 5/21/2010 22:27:01 | 25.304 7/16/2010 13:29:00 | 22.5 5/22/2010 20:36:01 | 26.429 |
| 5/21/2010 22:47:01 | 25.304 7/16/2010 14:04:00 | 22.5 5/22/2010 20:56:01 | 26.492 |
| 5/21/2010 23:07:01 | 25.304 7/16/2010 14:39:00 | 22.5 5/22/2010 21:16:01 | 26.492 |
| 5/21/2010 23:27:01 | 25.304 7/16/2010 15:14:00 | 22.5 5/22/2010 21:36:01 | 26.492 |
| 5/21/2010 23:47:01 | 25.304 7/16/2010 15:49:00 | 22.5 5/22/2010 21:56:01 | 26.492 |
| 5/22/2010 00:07:01 | 25.304 7/16/2010 16:24:00 | 22.5 5/22/2010 22:16:01 | 26.492 |
| 5/22/2010 00:27:01 | 25.304 7/16/2010 16:59:00 | 22.5 5/22/2010 22:36:01 | 26.492 |
| 5/22/2010 00:47:01 | 25.304 7/16/2010 17:34:00 | 22.5 5/22/2010 22:56:01 | 26.492 |
| 5/22/2010 01:07:01 | 25.242 7/16/2010 18:09:00 | 22.5 5/22/2010 23:16:01 | 26.554 |
| 5/22/2010 01:27:01 | 25.242 7/16/2010 18:44:00 | 23.0 5/22/2010 23:36:01 | 26.554 |
| 5/22/2010 01:47:01 | 25.242 7/16/2010 19:19:00 | 23.0 5/22/2010 23:56:01 | 26.554 |
| 5/22/2010 02:07:01 | 25.242 7/16/2010 19:54:00 | 23.0 5/23/2010 00:16:01 | 26.554 |
| 5/22/2010 02:27:01 | 25.242 7/16/2010 20:29:00 | 23.0 5/23/2010 00:36:01 | 26.554 |
| 5/22/2010 02:47:01 | 25.179 7/16/2010 21:04:00 | 23.0 5/23/2010 00:56:01 | 26.554 |
| 5/22/2010 03:07:01 | 25.179 7/16/2010 21:39:00 | 23.0 5/23/2010 01:16:01 | 26.554 |
| 5/22/2010 03:27:01 | 25.179 7/16/2010 22:14:00 | 23.0 5/23/2010 01:36:01 | 26.554 |
| 5/22/2010 03:47:01 | 25.179 7/16/2010 22:49:00 | 23.0 5/23/2010 01:56:01 | 26.554 |
| 5/22/2010 04:07:01 | 25.117 7/16/2010 23:24:00 | 23.0 5/23/2010 02:16:01 | 26.554 |
| 5/22/2010 04:27:01 | 25.117 7/16/2010 23:59:00 | 23.0 5/23/2010 02:36:01 | 26.554 |
| 5/22/2010 04:47:01 | 25.117 7/17/2010 00:34:00 | 23.0 5/23/2010 02:56:01 | 26.554 |
| 5/22/2010 05:07:01 | 25.054 7/17/2010 01:09:00 | 23.0 5/23/2010 03:16:01 | 26.554 |
| 5/22/2010 05:27:01 | 25.054 7/17/2010 01:44:00 | 23.0 5/23/2010 03:36:01 | 26.554 |
| 5/22/2010 05:47:01 | 25.054 7/17/2010 02:19:00 | 23.0 5/23/2010 03:56:01 | 26.554 |
| 5/22/2010 06:07:01 | 24.992 7/17/2010 02:54:00 | 23.0 5/23/2010 04:16:01 | 26.554 |
| 5/22/2010 06:27:01 | 24.992 7/17/2010 03:29:00 | 23.0 5/23/2010 04:36:01 | 26.492 |
| 5/22/2010 06:47:01 | 24.929 7/17/2010 04:04:00 | 23.0 5/23/2010 04:56:01 | 26.492 |
| 5/22/2010 07:07:01 | 24.929 7/17/2010 04:39:00 | 23.0 5/23/2010 05:16:01 | 26.492 |
| 5/22/2010 07:27:01 | 24.929 7/17/2010 05:14:00 | 23.0 5/23/2010 05:36:01 | 26.492 |
| 5/22/2010 07:47:01 | 24.867 7/17/2010 05:49:00 | 23.0 5/23/2010 05:56:01 | 26.492 |
| 5/22/2010 08:07:01 | 24.867 7/17/2010 06:24:00 | 22.5 5/23/2010 06:16:01 | 26.492 |
| 5/22/2010 08:27:01 | 24.804 7/17/2010 06:59:00 | 22.5 5/23/2010 06:36:01 | 26.492 |
| 5/22/2010 08:47:01 | 24.804 7/17/2010 07:34:00 | 22.5 5/23/2010 06:56:01 | 26.492 |
| 5/22/2010 09:07:01 | 24.804 7/17/2010 08:09:00 | 22.5 5/23/2010 07:16:01 | 26.429 |
| 5/22/2010 09:27:01 | 24.742 7/17/2010 08:44:00 | 22.5 5/23/2010 07:36:01 | 26.429 |
| 5/22/2010 09:47:01 | 24.742 7/17/2010 09:19:00 | 22.5 5/23/2010 07:56:01 | 26.429 |
| 5/22/2010 10:07:01 | 24.742 7/17/2010 09:54:00 | 22.5 5/23/2010 08:16:01 | 26.429 |
| 5/22/2010 10:27:01 | 24.679 7/17/2010 10:29:00 | 22.5 5/23/2010 08:36:01 | 26.429 |
| 5/22/2010 10:47:01 | 24.679 7/17/2010 11:04:00 | 22.5 5/23/2010 08:56:01 | 26.367 |
| 5/22/2010 11:07:01 | 24.679 7/17/2010 11:39:00 | 22.5 5/23/2010 09:16:01 | 26.367 |
| 5/22/2010 11:27:01 | 24.617 7/17/2010 12:14:00 | 22.5 5/23/2010 09:36:01 | 26.367 |



|                    |        |                    |      |                    |        |
|--------------------|--------|--------------------|------|--------------------|--------|
| 5/22/2010 11:47:01 | 24.617 | 7/17/2010 12:49:00 | 22.5 | 5/23/2010 09:56:01 | 26.367 |
| 5/22/2010 12:07:01 | 24.617 | 7/17/2010 13:24:00 | 22.5 | 5/23/2010 10:16:01 | 26.304 |
| 5/22/2010 12:27:01 | 24.617 | 7/17/2010 13:59:00 | 22.5 | 5/23/2010 10:36:01 | 26.304 |
| 5/22/2010 12:47:01 | 24.617 | 7/17/2010 14:34:00 | 22.5 | 5/23/2010 10:56:01 | 26.304 |
| 5/22/2010 13:07:01 | 24.617 | 7/17/2010 15:09:00 | 23.0 | 5/23/2010 11:16:01 | 26.304 |
| 5/22/2010 13:27:01 | 24.617 | 7/17/2010 15:44:00 | 23.0 | 5/23/2010 11:36:01 | 26.304 |
| 5/22/2010 13:47:01 | 24.617 | 7/17/2010 16:19:00 | 23.0 | 5/23/2010 11:56:01 | 26.304 |
| 5/22/2010 14:07:01 | 24.679 | 7/17/2010 16:54:00 | 23.0 | 5/23/2010 12:16:01 | 26.304 |
| 5/22/2010 14:27:01 | 24.679 | 7/17/2010 17:29:00 | 23.0 | 5/23/2010 12:36:01 | 26.304 |
| 5/22/2010 14:47:01 | 24.679 | 7/17/2010 18:04:00 | 23.0 | 5/23/2010 12:56:01 | 26.304 |
| 5/22/2010 15:07:01 | 24.742 | 7/17/2010 18:39:00 | 23.0 | 5/23/2010 13:16:01 | 26.242 |
| 5/22/2010 15:27:01 | 24.804 | 7/17/2010 19:14:00 | 23.0 | 5/23/2010 13:36:01 | 26.242 |
| 5/22/2010 15:47:01 | 24.804 | 7/17/2010 19:49:00 | 23.0 | 5/23/2010 13:56:01 | 26.242 |
| 5/22/2010 16:07:01 | 24.867 | 7/17/2010 20:24:00 | 23.5 | 5/23/2010 14:16:01 | 26.242 |
| 5/22/2010 16:27:01 | 24.867 | 7/17/2010 20:59:00 | 23.5 | 5/23/2010 14:36:01 | 26.242 |
| 5/22/2010 16:47:01 | 24.929 | 7/17/2010 21:34:00 | 23.5 | 5/23/2010 14:56:01 | 26.242 |
| 5/22/2010 17:07:01 | 24.929 | 7/17/2010 22:09:00 | 23.5 | 5/23/2010 15:16:01 | 26.179 |
| 5/22/2010 17:27:01 | 24.992 | 7/17/2010 22:44:00 | 23.5 | 5/23/2010 15:36:01 | 26.179 |
| 5/22/2010 17:47:01 | 24.992 | 7/17/2010 23:19:00 | 23.5 | 5/23/2010 15:56:01 | 26.179 |
| 5/22/2010 18:07:01 | 25.054 | 7/17/2010 23:54:00 | 23.5 | 5/23/2010 16:16:01 | 26.179 |
| 5/22/2010 18:27:01 | 25.054 | 7/18/2010 00:29:00 | 23.5 | 5/23/2010 16:36:01 | 26.179 |
| 5/22/2010 18:47:01 | 25.117 | 7/18/2010 01:04:00 | 23.5 | 5/23/2010 16:56:01 | 26.242 |
| 5/22/2010 19:07:01 | 25.117 | 7/18/2010 01:39:00 | 23.5 | 5/23/2010 17:16:01 | 26.242 |
| 5/22/2010 19:27:01 | 25.117 | 7/18/2010 02:14:00 | 23.0 | 5/23/2010 17:36:01 | 26.242 |
| 5/22/2010 19:47:01 | 25.117 | 7/18/2010 02:49:00 | 23.0 | 5/23/2010 17:56:01 | 26.242 |
| 5/22/2010 20:07:01 | 25.179 | 7/18/2010 03:24:00 | 23.0 | 5/23/2010 18:16:01 | 26.242 |
| 5/22/2010 20:27:01 | 25.179 | 7/18/2010 03:59:00 | 23.0 | 5/23/2010 18:36:01 | 26.242 |
| 5/22/2010 20:47:01 | 25.179 | 7/18/2010 04:34:00 | 23.0 | 5/23/2010 18:56:01 | 26.242 |
| 5/22/2010 21:07:01 | 25.179 | 7/18/2010 05:09:00 | 23.0 | 5/23/2010 19:16:01 | 26.242 |
| 5/22/2010 21:27:01 | 25.179 | 7/18/2010 05:44:00 | 23.0 | 5/23/2010 19:36:01 | 26.304 |
| 5/22/2010 21:47:01 | 25.179 | 7/18/2010 06:19:00 | 23.0 | 5/23/2010 19:56:01 | 26.304 |
| 5/22/2010 22:07:01 | 25.179 | 7/18/2010 06:54:00 | 23.0 | 5/23/2010 20:16:01 | 26.304 |
| 5/22/2010 22:27:01 | 25.179 | 7/18/2010 07:29:00 | 23.0 | 5/23/2010 20:36:01 | 26.304 |
| 5/22/2010 22:47:01 | 25.117 | 7/18/2010 08:04:00 | 23.0 | 5/23/2010 20:56:01 | 26.304 |
| 5/22/2010 23:07:01 | 25.117 | 7/18/2010 08:39:00 | 23.0 | 5/23/2010 21:16:01 | 26.367 |
| 5/22/2010 23:27:01 | 25.117 | 7/18/2010 09:14:00 | 23.0 | 5/23/2010 21:36:01 | 26.367 |
| 5/22/2010 23:47:01 | 25.117 | 7/18/2010 09:49:00 | 23.0 | 5/23/2010 21:56:01 | 26.367 |
| 5/23/2010 00:07:01 | 25.117 | 7/18/2010 10:24:00 | 23.0 | 5/23/2010 22:16:01 | 26.367 |
| 5/23/2010 00:27:01 | 25.054 | 7/18/2010 10:59:00 | 23.0 | 5/23/2010 22:36:01 | 26.367 |
| 5/23/2010 00:47:01 | 25.054 | 7/18/2010 11:34:00 | 23.0 | 5/23/2010 22:56:01 | 26.367 |
| 5/23/2010 01:07:01 | 25.054 | 7/18/2010 12:09:00 | 23.0 | 5/23/2010 23:16:01 | 26.367 |
| 5/23/2010 01:27:01 | 25.054 | 7/18/2010 12:44:00 | 23.0 | 5/23/2010 23:36:01 | 26.367 |
| 5/23/2010 01:47:01 | 24.992 | 7/18/2010 13:19:00 | 23.0 | 5/23/2010 23:56:01 | 26.429 |
| 5/23/2010 02:07:01 | 24.992 | 7/18/2010 13:54:00 | 23.0 | 5/24/2010 00:16:01 | 26.429 |
| 5/23/2010 02:27:01 | 24.992 | 7/18/2010 14:29:00 | 23.0 | 5/24/2010 00:36:01 | 26.429 |
| 5/23/2010 02:47:01 | 24.929 | 7/18/2010 15:04:00 | 23.0 | 5/24/2010 00:56:01 | 26.429 |
| 5/23/2010 03:07:01 | 24.929 | 7/18/2010 15:39:00 | 23.5 | 5/24/2010 01:16:01 | 26.429 |
| 5/23/2010 03:27:01 | 24.929 | 7/18/2010 16:14:00 | 23.5 | 5/24/2010 01:36:01 | 26.429 |
| 5/23/2010 03:47:01 | 24.867 | 7/18/2010 16:49:00 | 23.5 | 5/24/2010 01:56:01 | 26.429 |
| 5/23/2010 04:07:01 | 24.867 | 7/18/2010 17:24:00 | 23.5 | 5/24/2010 02:16:01 | 26.429 |

|                    |        |                    |      |                    |        |
|--------------------|--------|--------------------|------|--------------------|--------|
| 5/23/2010 04:27:01 | 24.867 | 7/18/2010 17:59:00 | 23.5 | 5/24/2010 02:36:01 | 26.429 |
| 5/23/2010 04:47:01 | 24.804 | 7/18/2010 18:34:00 | 23.5 | 5/24/2010 02:56:01 | 26.429 |
| 5/23/2010 05:07:01 | 24.804 | 7/18/2010 19:09:00 | 23.5 | 5/24/2010 03:16:01 | 26.367 |
| 5/23/2010 05:27:01 | 24.742 | 7/18/2010 19:44:00 | 23.5 | 5/24/2010 03:36:01 | 26.367 |
| 5/23/2010 05:47:01 | 24.742 | 7/18/2010 20:19:00 | 23.5 | 5/24/2010 03:56:01 | 26.367 |
| 5/23/2010 06:07:01 | 24.742 | 7/18/2010 20:54:00 | 23.5 | 5/24/2010 04:16:01 | 26.367 |
| 5/23/2010 06:27:01 | 24.679 | 7/18/2010 21:29:00 | 23.5 | 5/24/2010 04:36:01 | 26.367 |
| 5/23/2010 06:47:01 | 24.679 | 7/18/2010 22:04:00 | 23.5 | 5/24/2010 04:56:01 | 26.367 |
| 5/23/2010 07:07:01 | 24.679 | 7/18/2010 22:39:00 | 23.5 | 5/24/2010 05:16:01 | 26.367 |
| 5/23/2010 07:27:01 | 24.679 | 7/18/2010 23:14:00 | 23.5 | 5/24/2010 05:36:01 | 26.304 |
| 5/23/2010 07:47:01 | 24.617 | 7/18/2010 23:49:00 | 23.5 | 5/24/2010 05:56:01 | 26.304 |
| 5/23/2010 08:07:01 | 24.617 | 7/19/2010 00:24:00 | 23.5 | 5/24/2010 06:16:01 | 26.304 |
| 5/23/2010 08:27:01 | 24.617 | 7/19/2010 00:59:00 | 23.5 | 5/24/2010 06:36:01 | 26.304 |
| 5/23/2010 08:47:01 | 24.554 | 7/19/2010 01:34:00 | 23.5 | 5/24/2010 06:56:01 | 26.304 |
| 5/23/2010 09:07:01 | 24.554 | 7/19/2010 02:09:00 | 23.5 | 5/24/2010 07:16:01 | 26.304 |
| 5/23/2010 09:27:01 | 24.554 | 7/19/2010 02:44:00 | 23.5 | 5/24/2010 07:36:01 | 26.242 |
| 5/23/2010 09:47:01 | 24.492 | 7/19/2010 03:19:00 | 23.5 | 5/24/2010 07:56:01 | 26.242 |
| 5/23/2010 10:07:01 | 24.492 | 7/19/2010 03:54:00 | 23.5 | 5/24/2010 08:16:01 | 26.242 |
| 5/23/2010 10:27:01 | 24.492 | 7/19/2010 04:29:00 | 23.5 | 5/24/2010 08:36:01 | 26.242 |
| 5/23/2010 10:47:01 | 24.492 | 7/19/2010 05:04:00 | 23.5 | 5/24/2010 08:56:01 | 26.242 |
| 5/23/2010 11:07:01 | 24.429 | 7/19/2010 05:39:00 | 23.5 | 5/24/2010 09:16:01 | 26.179 |
| 5/23/2010 11:27:01 | 24.429 | 7/19/2010 06:14:00 | 23.5 | 5/24/2010 09:36:01 | 26.179 |
| 5/23/2010 11:47:01 | 24.429 | 7/19/2010 06:49:00 | 23.5 | 5/24/2010 09:56:01 | 26.179 |
| 5/23/2010 12:07:01 | 24.429 | 7/19/2010 07:24:00 | 23.5 | 5/24/2010 10:16:01 | 26.179 |
| 5/23/2010 12:27:01 | 24.429 | 7/19/2010 07:59:00 | 23.5 | 5/24/2010 10:36:01 | 26.117 |
| 5/23/2010 12:47:01 | 24.429 | 7/19/2010 08:34:00 | 23.5 | 5/24/2010 10:56:01 | 26.117 |
| 5/23/2010 13:07:01 | 24.429 | 7/19/2010 09:09:00 | 23.0 | 5/24/2010 11:16:01 | 26.117 |
| 5/23/2010 13:27:01 | 24.429 | 7/19/2010 09:44:00 | 23.0 | 5/24/2010 11:36:01 | 26.117 |
| 5/23/2010 13:47:01 | 24.492 | 7/19/2010 10:19:00 | 23.0 | 5/24/2010 11:56:01 | 26.117 |
| 5/23/2010 14:07:01 | 24.492 | 7/19/2010 10:54:00 | 23.0 | 5/24/2010 12:16:01 | 26.054 |
| 5/23/2010 14:27:01 | 24.492 | 7/19/2010 11:29:00 | 23.0 | 5/24/2010 12:36:01 | 26.054 |
| 5/23/2010 14:47:01 | 24.554 | 7/19/2010 12:04:00 | 23.5 | 5/24/2010 12:56:01 | 26.054 |
| 5/23/2010 15:07:01 | 24.554 | 7/19/2010 12:39:00 | 23.5 | 5/24/2010 13:16:01 | 26.054 |
| 5/23/2010 15:27:01 | 24.617 | 7/19/2010 13:14:00 | 23.5 | 5/24/2010 13:36:01 | 26.054 |
| 5/23/2010 15:47:01 | 24.617 | 7/19/2010 13:49:00 | 23.5 | 5/24/2010 13:56:01 | 26.054 |
| 5/23/2010 16:07:01 | 24.679 | 7/19/2010 14:24:00 | 23.5 | 5/24/2010 14:16:01 | 25.992 |
| 5/23/2010 16:27:01 | 24.679 | 7/19/2010 14:59:00 | 23.5 | 5/24/2010 14:36:01 | 25.992 |
| 5/23/2010 16:47:01 | 24.742 | 7/19/2010 15:34:00 | 23.5 | 5/24/2010 14:56:01 | 25.992 |
| 5/23/2010 17:07:01 | 24.804 | 7/19/2010 16:09:00 | 23.5 | 5/24/2010 15:16:01 | 25.992 |
| 5/23/2010 17:27:01 | 24.804 | 7/19/2010 16:44:00 | 23.5 | 5/24/2010 15:36:01 | 25.992 |
| 5/23/2010 17:47:01 | 24.867 | 7/19/2010 17:19:00 | 23.5 | 5/24/2010 15:56:01 | 25.992 |
| 5/23/2010 18:07:01 | 24.867 | 7/19/2010 17:54:00 | 23.5 | 5/24/2010 16:16:01 | 25.992 |
| 5/23/2010 18:27:01 | 24.867 | 7/19/2010 18:29:00 | 23.5 | 5/24/2010 16:36:01 | 25.992 |
| 5/23/2010 18:47:01 | 24.929 | 7/19/2010 19:04:00 | 23.5 | 5/24/2010 16:56:01 | 25.992 |
| 5/23/2010 19:07:01 | 24.929 | 7/19/2010 19:39:00 | 23.5 | 5/24/2010 17:16:01 | 26.054 |
| 5/23/2010 19:27:01 | 24.929 | 7/19/2010 20:14:00 | 23.5 | 5/24/2010 17:36:01 | 26.054 |
| 5/23/2010 19:47:01 | 24.992 | 7/19/2010 20:49:00 | 23.5 | 5/24/2010 17:56:01 | 26.054 |
| 5/23/2010 20:07:01 | 24.992 | 7/19/2010 21:24:00 | 24.0 | 5/24/2010 18:16:01 | 26.054 |
| 5/23/2010 20:27:01 | 24.992 | 7/19/2010 21:59:00 | 23.5 | 5/24/2010 18:36:01 | 26.054 |
| 5/23/2010 20:47:01 | 24.992 | 7/19/2010 22:34:00 | 23.5 | 5/24/2010 18:56:01 | 26.054 |

|                    |        |                    |      |                    |        |
|--------------------|--------|--------------------|------|--------------------|--------|
| 5/23/2010 21:07:01 | 24.992 | 7/19/2010 23:09:00 | 23.5 | 5/24/2010 19:16:01 | 26.054 |
| 5/23/2010 21:27:01 | 24.992 | 7/19/2010 23:44:00 | 23.5 | 5/24/2010 19:36:01 | 26.117 |
| 5/23/2010 21:47:01 | 24.992 | 7/20/2010 00:19:00 | 23.5 | 5/24/2010 19:56:01 | 26.117 |
| 5/23/2010 22:07:01 | 24.992 | 7/20/2010 00:54:00 | 23.5 | 5/24/2010 20:16:01 | 26.117 |
| 5/23/2010 22:27:01 | 24.992 | 7/20/2010 01:29:00 | 23.5 | 5/24/2010 20:36:01 | 26.117 |
| 5/23/2010 22:47:01 | 24.992 | 7/20/2010 02:04:00 | 23.5 | 5/24/2010 20:56:01 | 26.179 |
| 5/23/2010 23:07:01 | 24.929 | 7/20/2010 02:39:00 | 23.5 | 5/24/2010 21:16:01 | 26.179 |
| 5/23/2010 23:27:01 | 24.929 | 7/20/2010 03:14:00 | 23.5 | 5/24/2010 21:36:01 | 26.179 |
| 5/23/2010 23:47:01 | 24.929 | 7/20/2010 03:49:00 | 23.5 | 5/24/2010 21:56:01 | 26.179 |
| 5/24/2010 00:07:01 | 24.929 | 7/20/2010 04:24:00 | 23.5 | 5/24/2010 22:16:01 | 26.179 |
| 5/24/2010 00:27:01 | 24.867 | 7/20/2010 04:59:00 | 23.5 | 5/24/2010 22:36:01 | 26.242 |
| 5/24/2010 00:47:01 | 24.867 | 7/20/2010 05:34:00 | 23.5 | 5/24/2010 22:56:01 | 26.242 |
| 5/24/2010 01:07:01 | 24.867 | 7/20/2010 06:09:00 | 23.5 | 5/24/2010 23:16:01 | 26.242 |
| 5/24/2010 01:27:01 | 24.804 | 7/20/2010 06:44:00 | 23.5 | 5/24/2010 23:36:01 | 26.242 |
| 5/24/2010 01:47:01 | 24.804 | 7/20/2010 07:19:00 | 23.0 | 5/24/2010 23:56:01 | 26.242 |
| 5/24/2010 02:07:01 | 24.804 | 7/20/2010 07:54:00 | 23.0 | 5/25/2010 00:16:01 | 26.242 |
| 5/24/2010 02:27:01 | 24.742 | 7/20/2010 08:29:00 | 23.0 | 5/25/2010 00:36:01 | 26.242 |
| 5/24/2010 02:47:01 | 24.742 | 7/20/2010 09:04:00 | 23.0 | 5/25/2010 00:56:01 | 26.242 |
| 5/24/2010 03:07:01 | 24.742 | 7/20/2010 09:39:00 | 23.0 | 5/25/2010 01:16:01 | 26.242 |
| 5/24/2010 03:27:01 | 24.679 | 7/20/2010 10:14:00 | 23.0 | 5/25/2010 01:36:01 | 26.242 |
| 5/24/2010 03:47:01 | 24.679 | 7/20/2010 10:49:00 | 23.0 | 5/25/2010 01:56:01 | 26.304 |
| 5/24/2010 04:07:01 | 24.679 | 7/20/2010 11:24:00 | 23.0 | 5/25/2010 02:16:01 | 26.304 |
| 5/24/2010 04:27:01 | 24.617 | 7/20/2010 11:59:00 | 23.0 | 5/25/2010 02:36:01 | 26.304 |
| 5/24/2010 04:47:01 | 24.617 | 7/20/2010 12:34:00 | 23.0 | 5/25/2010 02:56:01 | 26.304 |
| 5/24/2010 05:07:01 | 24.554 | 7/20/2010 13:09:00 | 23.0 | 5/25/2010 03:16:01 | 26.304 |
| 5/24/2010 05:27:01 | 24.554 | 7/20/2010 13:44:00 | 23.0 | 5/25/2010 03:36:01 | 26.304 |
| 5/24/2010 05:47:01 | 24.554 | 7/20/2010 14:19:00 | 23.0 | 5/25/2010 03:56:01 | 26.304 |
| 5/24/2010 06:07:01 | 24.492 | 7/20/2010 14:54:00 | 23.0 | 5/25/2010 04:16:01 | 26.304 |
| 5/24/2010 06:27:01 | 24.492 | 7/20/2010 15:29:00 | 23.5 | 5/25/2010 04:36:01 | 26.304 |
| 5/24/2010 06:47:01 | 24.492 | 7/20/2010 16:04:00 | 23.5 | 5/25/2010 04:56:01 | 26.304 |
| 5/24/2010 07:07:01 | 24.492 | 7/20/2010 16:39:00 | 23.5 | 5/25/2010 05:16:01 | 26.242 |
| 5/24/2010 07:27:01 | 24.429 | 7/20/2010 17:14:00 | 23.5 | 5/25/2010 05:36:01 | 26.242 |
| 5/24/2010 07:47:01 | 24.429 | 7/20/2010 17:49:00 | 23.5 | 5/25/2010 05:56:01 | 26.242 |
| 5/24/2010 08:07:01 | 24.429 | 7/20/2010 18:24:00 | 23.5 | 5/25/2010 06:16:01 | 26.242 |
| 5/24/2010 08:27:01 | 24.367 | 7/20/2010 18:59:00 | 23.5 | 5/25/2010 06:36:01 | 26.242 |
| 5/24/2010 08:47:01 | 24.367 | 7/20/2010 19:34:00 | 23.5 | 5/25/2010 06:56:01 | 26.242 |
| 5/24/2010 09:07:01 | 24.304 | 7/20/2010 20:09:00 | 23.5 | 5/25/2010 07:16:01 | 26.242 |
| 5/24/2010 09:27:01 | 24.304 | 7/20/2010 20:44:00 | 23.5 | 5/25/2010 07:36:01 | 26.242 |
| 5/24/2010 09:47:01 | 24.304 | 7/20/2010 21:19:00 | 23.5 | 5/25/2010 07:56:01 | 26.242 |
| 5/24/2010 10:07:01 | 24.304 | 7/20/2010 21:54:00 | 23.5 | 5/25/2010 08:16:01 | 26.242 |
| 5/24/2010 10:27:01 | 24.242 | 7/20/2010 22:29:00 | 23.5 | 5/25/2010 08:36:01 | 26.242 |
| 5/24/2010 10:47:01 | 24.242 | 7/20/2010 23:04:00 | 23.5 | 5/25/2010 08:56:01 | 26.179 |
| 5/24/2010 11:07:01 | 24.242 | 7/20/2010 23:39:00 | 23.5 | 5/25/2010 09:16:01 | 26.179 |
| 5/24/2010 11:27:01 | 24.242 | 7/21/2010 00:14:00 | 23.5 | 5/25/2010 09:36:01 | 26.179 |
| 5/24/2010 11:47:01 | 24.242 | 7/21/2010 00:49:00 | 23.5 | 5/25/2010 09:56:01 | 26.179 |
| 5/24/2010 12:07:01 | 24.242 | 7/21/2010 01:24:00 | 23.5 | 5/25/2010 10:16:01 | 26.179 |
| 5/24/2010 12:27:01 | 24.242 | 7/21/2010 01:59:00 | 23.5 | 5/25/2010 10:36:01 | 26.179 |
| 5/24/2010 12:47:01 | 24.242 | 7/21/2010 02:34:00 | 23.5 | 5/25/2010 10:56:01 | 26.179 |
| 5/24/2010 13:07:01 | 24.242 | 7/21/2010 03:09:00 | 23.5 | 5/25/2010 11:16:01 | 26.117 |
| 5/24/2010 13:27:01 | 24.242 | 7/21/2010 03:44:00 | 23.5 | 5/25/2010 11:36:01 | 26.117 |

|                    |        |                    |      |                    |        |
|--------------------|--------|--------------------|------|--------------------|--------|
| 5/24/2010 13:47:01 | 24.242 | 7/21/2010 04:19:00 | 23.5 | 5/25/2010 11:56:01 | 26.117 |
| 5/24/2010 14:07:01 | 24.304 | 7/21/2010 04:54:00 | 23.5 | 5/25/2010 12:16:01 | 26.117 |
| 5/24/2010 14:27:01 | 24.304 | 7/21/2010 05:29:00 | 23.5 | 5/25/2010 12:36:01 | 26.117 |
| 5/24/2010 14:47:01 | 24.367 | 7/21/2010 06:04:00 | 23.5 | 5/25/2010 12:56:01 | 26.117 |
| 5/24/2010 15:07:01 | 24.367 | 7/21/2010 06:39:00 | 23.0 | 5/25/2010 13:16:01 | 26.117 |
| 5/24/2010 15:27:01 | 24.429 | 7/21/2010 07:14:00 | 23.0 | 5/25/2010 13:36:01 | 26.054 |
| 5/24/2010 15:47:01 | 24.429 | 7/21/2010 07:49:00 | 23.0 | 5/25/2010 13:56:01 | 26.054 |
| 5/24/2010 16:07:01 | 24.492 | 7/21/2010 08:24:00 | 23.0 | 5/25/2010 14:16:01 | 26.054 |
| 5/24/2010 16:27:01 | 24.554 | 7/21/2010 08:59:00 | 23.0 | 5/25/2010 14:36:01 | 26.054 |
| 5/24/2010 16:47:01 | 24.554 | 7/21/2010 09:34:00 | 23.0 | 5/25/2010 14:56:01 | 26.054 |
| 5/24/2010 17:07:01 | 24.617 | 7/21/2010 10:09:00 | 23.0 | 5/25/2010 15:16:01 | 26.054 |
| 5/24/2010 17:27:01 | 24.679 | 7/21/2010 10:44:00 | 23.0 | 5/25/2010 15:36:01 | 26.054 |
| 5/24/2010 17:47:01 | 24.679 | 7/21/2010 11:19:00 | 23.0 | 5/25/2010 15:56:01 | 26.054 |
| 5/24/2010 18:07:01 | 24.742 | 7/21/2010 11:54:00 | 23.0 | 5/25/2010 16:16:01 | 26.054 |
| 5/24/2010 18:27:01 | 24.742 | 7/21/2010 12:29:00 | 23.0 | 5/25/2010 16:36:01 | 26.117 |
| 5/24/2010 18:47:01 | 24.742 | 7/21/2010 13:04:00 | 23.0 | 5/25/2010 16:56:01 | 26.117 |
| 5/24/2010 19:07:01 | 24.804 | 7/21/2010 13:39:00 | 23.0 | 5/25/2010 17:16:01 | 26.117 |
| 5/24/2010 19:27:01 | 24.804 | 7/21/2010 14:14:00 | 23.0 | 5/25/2010 17:36:01 | 26.117 |
| 5/24/2010 19:47:01 | 24.804 | 7/21/2010 14:49:00 | 23.0 | 5/25/2010 17:56:01 | 26.117 |
| 5/24/2010 20:07:01 | 24.867 | 7/21/2010 15:24:00 | 23.0 | 5/25/2010 18:16:01 | 26.117 |
| 5/24/2010 20:27:01 | 24.867 | 7/21/2010 15:59:00 | 23.0 | 5/25/2010 18:36:01 | 26.117 |
| 5/24/2010 20:47:01 | 24.867 | 7/21/2010 16:34:00 | 23.0 | 5/25/2010 18:56:01 | 26.179 |
| 5/24/2010 21:07:01 | 24.867 | 7/21/2010 17:09:00 | 23.5 | 5/25/2010 19:16:01 | 26.179 |
| 5/24/2010 21:27:01 | 24.867 | 7/21/2010 17:44:00 | 23.5 | 5/25/2010 19:36:01 | 26.179 |
| 5/24/2010 21:47:01 | 24.867 | 7/21/2010 18:19:00 | 23.5 | 5/25/2010 19:56:01 | 26.179 |
| 5/24/2010 22:07:01 | 24.867 | 7/21/2010 18:54:00 | 23.5 | 5/25/2010 20:16:01 | 26.242 |
| 5/24/2010 22:27:01 | 24.867 | 7/21/2010 19:29:00 | 23.5 | 5/25/2010 20:36:01 | 26.242 |
| 5/24/2010 22:47:01 | 24.867 | 7/21/2010 20:04:00 | 23.5 | 5/25/2010 20:56:01 | 26.242 |
| 5/24/2010 23:07:01 | 24.867 | 7/21/2010 20:39:00 | 23.5 | 5/25/2010 21:16:01 | 26.242 |
| 5/24/2010 23:27:01 | 24.867 | 7/21/2010 21:14:00 | 23.5 | 5/25/2010 21:36:01 | 26.242 |
| 5/24/2010 23:47:01 | 24.867 | 7/21/2010 21:49:00 | 23.5 | 5/25/2010 21:56:01 | 26.304 |
| 5/25/2010 00:07:01 | 24.867 | 7/21/2010 22:24:00 | 23.5 | 5/25/2010 22:16:01 | 26.304 |
| 5/25/2010 00:27:01 | 24.867 | 7/21/2010 22:59:00 | 23.5 | 5/25/2010 22:36:01 | 26.304 |
| 5/25/2010 00:47:01 | 24.867 | 7/21/2010 23:34:00 | 23.5 | 5/25/2010 22:56:01 | 26.304 |
| 5/25/2010 01:07:01 | 24.804 | 7/22/2010 00:09:00 | 23.5 | 5/25/2010 23:16:01 | 26.304 |
| 5/25/2010 01:27:01 | 24.804 | 7/22/2010 00:44:00 | 23.5 | 5/25/2010 23:36:01 | 26.367 |
| 5/25/2010 01:47:01 | 24.804 | 7/22/2010 01:19:00 | 23.5 | 5/25/2010 23:56:01 | 26.367 |
| 5/25/2010 02:07:01 | 24.804 | 7/22/2010 01:54:00 | 23.5 | 5/26/2010 00:16:01 | 26.367 |
| 5/25/2010 02:27:01 | 24.804 | 7/22/2010 02:29:00 | 23.5 | 5/26/2010 00:36:01 | 26.367 |
| 5/25/2010 02:47:01 | 24.804 | 7/22/2010 03:04:00 | 23.5 | 5/26/2010 00:56:01 | 26.367 |
| 5/25/2010 03:07:01 | 24.742 | 7/22/2010 03:39:00 | 23.5 | 5/26/2010 01:16:01 | 26.367 |
| 5/25/2010 03:27:01 | 24.742 | 7/22/2010 04:14:00 | 23.5 | 5/26/2010 01:36:01 | 26.367 |
| 5/25/2010 03:47:01 | 24.742 | 7/22/2010 04:49:00 | 23.0 | 5/26/2010 01:56:01 | 26.367 |
| 5/25/2010 04:07:01 | 24.742 | 7/22/2010 05:24:00 | 23.0 | 5/26/2010 02:16:01 | 26.367 |
| 5/25/2010 04:27:01 | 24.742 | 7/22/2010 05:59:00 | 23.0 | 5/26/2010 02:36:01 | 26.367 |
| 5/25/2010 04:47:01 | 24.742 | 7/22/2010 06:34:00 | 23.0 | 5/26/2010 02:56:01 | 26.367 |
| 5/25/2010 05:07:01 | 24.679 | 7/22/2010 07:09:00 | 23.0 | 5/26/2010 03:16:01 | 26.367 |
| 5/25/2010 05:27:01 | 24.679 | 7/22/2010 07:44:00 | 23.0 | 5/26/2010 03:36:01 | 26.367 |
| 5/25/2010 05:47:01 | 24.679 | 7/22/2010 08:19:00 | 23.0 | 5/26/2010 03:56:01 | 26.367 |
| 5/25/2010 06:07:01 | 24.679 | 7/22/2010 08:54:00 | 23.0 | 5/26/2010 04:16:01 | 26.304 |

|                    |        |                    |      |                    |        |
|--------------------|--------|--------------------|------|--------------------|--------|
| 5/25/2010 06:27:01 | 24.617 | 7/22/2010 09:29:00 | 23.0 | 5/26/2010 04:36:01 | 26.304 |
| 5/25/2010 06:47:01 | 24.617 | 7/22/2010 10:04:00 | 23.0 | 5/26/2010 04:56:01 | 26.304 |
| 5/25/2010 07:07:01 | 24.617 | 7/22/2010 10:39:00 | 23.0 | 5/26/2010 05:16:01 | 26.304 |
| 5/25/2010 07:27:01 | 24.617 | 7/22/2010 11:14:00 | 23.0 | 5/26/2010 05:36:01 | 26.304 |
| 5/25/2010 07:47:01 | 24.617 | 7/22/2010 11:49:00 | 23.0 | 5/26/2010 05:56:01 | 26.304 |
| 5/25/2010 08:07:01 | 24.554 | 7/22/2010 12:24:00 | 23.0 | 5/26/2010 06:16:01 | 26.304 |
| 5/25/2010 08:27:01 | 24.554 | 7/22/2010 12:59:00 | 23.0 | 5/26/2010 06:36:01 | 26.242 |
| 5/25/2010 08:47:01 | 24.554 | 7/22/2010 13:34:00 | 23.0 | 5/26/2010 06:56:01 | 26.242 |
| 5/25/2010 09:07:01 | 24.554 | 7/22/2010 14:09:00 | 23.0 | 5/26/2010 07:16:01 | 26.242 |
| 5/25/2010 09:27:01 | 24.492 | 7/22/2010 14:44:00 | 23.0 | 5/26/2010 07:36:01 | 26.242 |
| 5/25/2010 09:47:01 | 24.492 | 7/22/2010 15:19:00 | 23.0 | 5/26/2010 07:56:01 | 26.242 |
| 5/25/2010 10:07:01 | 24.492 | 7/22/2010 15:54:00 | 23.0 | 5/26/2010 08:16:01 | 26.179 |
| 5/25/2010 10:27:01 | 24.492 | 7/22/2010 16:29:00 | 23.0 | 5/26/2010 08:36:01 | 26.179 |
| 5/25/2010 10:47:01 | 24.429 | 7/22/2010 17:04:00 | 23.0 | 5/26/2010 08:56:01 | 26.179 |
| 5/25/2010 11:07:01 | 24.429 | 7/22/2010 17:39:00 | 23.0 | 5/26/2010 09:16:01 | 26.179 |
| 5/25/2010 11:27:01 | 24.429 | 7/22/2010 18:14:00 | 23.5 | 5/26/2010 09:36:01 | 26.179 |
| 5/25/2010 11:47:01 | 24.429 | 7/22/2010 18:49:00 | 23.5 | 5/26/2010 09:56:01 | 26.117 |
| 5/25/2010 12:07:01 | 24.429 | 7/22/2010 19:24:00 | 23.5 | 5/26/2010 10:16:01 | 26.117 |
| 5/25/2010 12:27:01 | 24.429 | 7/22/2010 19:59:00 | 23.5 | 5/26/2010 10:36:01 | 26.117 |
| 5/25/2010 12:47:01 | 24.429 | 7/22/2010 20:34:00 | 23.5 | 5/26/2010 10:56:01 | 26.117 |
| 5/25/2010 13:07:01 | 24.429 | 7/22/2010 21:09:00 | 23.5 | 5/26/2010 11:16:01 | 26.054 |
| 5/25/2010 13:27:01 | 24.492 | 7/22/2010 21:44:00 | 23.5 | 5/26/2010 11:36:01 | 26.054 |
| 5/25/2010 13:47:01 | 24.492 | 7/22/2010 22:19:00 | 23.5 | 5/26/2010 11:56:01 | 26.054 |
| 5/25/2010 14:07:01 | 24.492 | 7/22/2010 22:54:00 | 23.5 | 5/26/2010 12:16:01 | 26.054 |
| 5/25/2010 14:27:01 | 24.554 | 7/22/2010 23:29:00 | 23.5 | 5/26/2010 12:36:01 | 26.054 |
| 5/25/2010 14:47:01 | 24.554 | 7/23/2010 00:04:00 | 23.5 | 5/26/2010 12:56:01 | 26.054 |
| 5/25/2010 15:07:01 | 24.617 | 7/23/2010 00:39:00 | 23.5 | 5/26/2010 13:16:01 | 26.054 |
| 5/25/2010 15:27:01 | 24.617 | 7/23/2010 01:14:00 | 23.5 | 5/26/2010 13:36:01 | 26.054 |
| 5/25/2010 15:47:01 | 24.679 | 7/23/2010 01:49:00 | 23.5 | 5/26/2010 13:56:01 | 25.992 |
| 5/25/2010 16:07:01 | 24.679 | 7/23/2010 02:24:00 | 23.5 | 5/26/2010 14:16:01 | 25.992 |
| 5/25/2010 16:27:01 | 24.742 | 7/23/2010 02:59:00 | 23.5 | 5/26/2010 14:36:01 | 25.992 |
| 5/25/2010 16:47:01 | 24.804 | 7/23/2010 03:34:00 | 23.5 | 5/26/2010 14:56:01 | 25.992 |
| 5/25/2010 17:07:01 | 24.804 | 7/23/2010 04:09:00 | 23.5 | 5/26/2010 15:16:01 | 25.992 |
| 5/25/2010 17:27:01 | 24.867 | 7/23/2010 04:44:00 | 23.5 | 5/26/2010 15:36:01 | 25.992 |
| 5/25/2010 17:47:01 | 24.867 | 7/23/2010 05:19:00 | 23.5 | 5/26/2010 15:56:01 | 25.992 |
| 5/25/2010 18:07:01 | 24.929 | 7/23/2010 05:54:00 | 23.5 | 5/26/2010 16:16:01 | 25.992 |
| 5/25/2010 18:27:01 | 24.929 | 7/23/2010 06:29:00 | 23.5 | 5/26/2010 16:36:01 | 25.992 |
| 5/25/2010 18:47:01 | 24.992 | 7/23/2010 07:04:00 | 23.5 | 5/26/2010 16:56:01 | 25.992 |
| 5/25/2010 19:07:01 | 24.992 | 7/23/2010 07:39:00 | 23.5 | 5/26/2010 17:16:01 | 25.992 |
| 5/25/2010 19:27:01 | 24.992 | 7/23/2010 08:14:00 | 23.5 | 5/26/2010 17:36:01 | 26.054 |
| 5/25/2010 19:47:01 | 25.054 | 7/23/2010 08:49:00 | 23.5 | 5/26/2010 17:56:01 | 26.054 |
| 5/25/2010 20:07:01 | 25.054 | 7/23/2010 09:24:00 | 23.5 | 5/26/2010 18:16:01 | 26.054 |
| 5/25/2010 20:27:01 | 25.054 | 7/23/2010 09:59:00 | 23.5 | 5/26/2010 18:36:01 | 26.054 |
| 5/25/2010 20:47:01 | 25.054 | 7/23/2010 10:34:00 | 23.5 | 5/26/2010 18:56:01 | 26.054 |
| 5/25/2010 21:07:01 | 25.054 | 7/23/2010 11:09:00 | 23.5 | 5/26/2010 19:16:01 | 26.117 |
| 5/25/2010 21:27:01 | 25.054 | 7/23/2010 11:44:00 | 23.5 | 5/26/2010 19:36:01 | 26.117 |
| 5/25/2010 21:47:01 | 25.054 | 7/23/2010 12:19:00 | 23.5 | 5/26/2010 19:56:01 | 26.117 |
| 5/25/2010 22:07:01 | 25.054 | 7/23/2010 12:54:00 | 23.5 | 5/26/2010 20:16:01 | 26.117 |
| 5/25/2010 22:27:01 | 25.054 | 7/23/2010 13:29:00 | 23.5 | 5/26/2010 20:36:01 | 26.117 |
| 5/25/2010 22:47:01 | 25.054 | 7/23/2010 14:04:00 | 23.5 | 5/26/2010 20:56:01 | 26.179 |

|                    |                           |                         |        |
|--------------------|---------------------------|-------------------------|--------|
| 5/25/2010 23:07:01 | 24.992 7/23/2010 14:39:00 | 23.5 5/26/2010 21:16:01 | 26.179 |
| 5/25/2010 23:27:01 | 24.992 7/23/2010 15:14:00 | 23.5 5/26/2010 21:36:01 | 26.179 |
| 5/25/2010 23:47:01 | 24.992 7/23/2010 15:49:00 | 23.5 5/26/2010 21:56:01 | 26.179 |
| 5/26/2010 00:07:01 | 24.992 7/23/2010 16:24:00 | 23.5 5/26/2010 22:16:01 | 26.242 |
| 5/26/2010 00:27:01 | 24.992 7/23/2010 16:59:00 | 23.5 5/26/2010 22:36:01 | 26.242 |
| 5/26/2010 00:47:01 | 24.929 7/23/2010 17:34:00 | 23.5 5/26/2010 22:56:01 | 26.242 |
| 5/26/2010 01:07:01 | 24.929 7/23/2010 18:09:00 | 23.5 5/26/2010 23:16:01 | 26.242 |
| 5/26/2010 01:27:01 | 24.929 7/23/2010 18:44:00 | 23.5 5/26/2010 23:36:01 | 26.242 |
| 5/26/2010 01:47:01 | 24.867 7/23/2010 19:19:00 | 23.5 5/26/2010 23:56:01 | 26.242 |
| 5/26/2010 02:07:01 | 24.867 7/23/2010 19:54:00 | 23.5 5/27/2010 00:16:01 | 26.304 |
| 5/26/2010 02:27:01 | 24.867 7/23/2010 20:29:00 | 23.5 5/27/2010 00:36:01 | 26.304 |
| 5/26/2010 02:47:01 | 24.867 7/23/2010 21:04:00 | 23.5 5/27/2010 00:56:01 | 26.304 |
| 5/26/2010 03:07:01 | 24.804 7/23/2010 21:39:00 | 23.5 5/27/2010 01:16:01 | 26.304 |
| 5/26/2010 03:27:01 | 24.804 7/23/2010 22:14:00 | 23.5 5/27/2010 01:36:01 | 26.304 |
| 5/26/2010 03:47:01 | 24.804 7/23/2010 22:49:00 | 23.5 5/27/2010 01:56:01 | 26.304 |
| 5/26/2010 04:07:01 | 24.742 7/23/2010 23:24:00 | 23.5 5/27/2010 02:16:01 | 26.304 |
| 5/26/2010 04:27:01 | 24.742 7/23/2010 23:59:00 | 23.5 5/27/2010 02:36:01 | 26.304 |
| 5/26/2010 04:47:01 | 24.742 7/24/2010 00:34:00 | 23.5 5/27/2010 02:56:01 | 26.304 |
| 5/26/2010 05:07:01 | 24.679 7/24/2010 01:09:00 | 23.5 5/27/2010 03:16:01 | 26.304 |
| 5/26/2010 05:27:01 | 24.679 7/24/2010 01:44:00 | 23.5 5/27/2010 03:36:01 | 26.304 |
| 5/26/2010 05:47:01 | 24.679 7/24/2010 02:19:00 | 23.5 5/27/2010 03:56:01 | 26.304 |
| 5/26/2010 06:07:01 | 24.617 7/24/2010 02:54:00 | 23.5 5/27/2010 04:16:01 | 26.304 |
| 5/26/2010 06:27:01 | 24.617 7/24/2010 03:29:00 | 23.5 5/27/2010 04:36:01 | 26.304 |
| 5/26/2010 06:47:01 | 24.554 7/24/2010 04:04:00 | 23.5 5/27/2010 04:56:01 | 26.304 |
| 5/26/2010 07:07:01 | 24.554 7/24/2010 04:39:00 | 23.5 5/27/2010 05:16:01 | 26.242 |
| 5/26/2010 07:27:01 | 24.554 7/24/2010 05:14:00 | 23.5 5/27/2010 05:36:01 | 26.304 |
| 5/26/2010 07:47:01 | 24.492 7/24/2010 05:49:00 | 23.5 5/27/2010 05:56:01 | 26.242 |
| 5/26/2010 08:07:01 | 24.492 7/24/2010 06:24:00 | 23.5 5/27/2010 06:16:01 | 26.242 |
| 5/26/2010 08:27:01 | 24.492 7/24/2010 06:59:00 | 23.5 5/27/2010 06:36:01 | 26.242 |
| 5/26/2010 08:47:01 | 24.429 7/24/2010 07:34:00 | 23.5 5/27/2010 06:56:01 | 26.242 |
| 5/26/2010 09:07:01 | 24.429 7/24/2010 08:09:00 | 23.0 5/27/2010 07:16:01 | 26.242 |
| 5/26/2010 09:27:01 | 24.429 7/24/2010 08:44:00 | 23.0 5/27/2010 07:36:01 | 26.242 |
| 5/26/2010 09:47:01 | 24.367 7/24/2010 09:19:00 | 23.0 5/27/2010 07:56:01 | 26.242 |
| 5/26/2010 10:07:01 | 24.367 7/24/2010 09:54:00 | 23.0 5/27/2010 08:16:01 | 26.242 |
| 5/26/2010 10:27:01 | 24.367 7/24/2010 10:29:00 | 23.0 5/27/2010 08:36:01 | 26.179 |
| 5/26/2010 10:47:01 | 24.367 7/24/2010 11:04:00 | 23.0 5/27/2010 08:56:01 | 26.179 |
| 5/26/2010 11:07:01 | 24.304 7/24/2010 11:39:00 | 23.0 5/27/2010 09:16:01 | 26.179 |
| 5/26/2010 11:27:01 | 24.304 7/24/2010 12:14:00 | 23.0 5/27/2010 09:36:01 | 26.179 |
| 5/26/2010 11:47:01 | 24.304 7/24/2010 12:49:00 | 23.0 5/27/2010 09:56:01 | 26.179 |
| 5/26/2010 12:07:01 | 24.304 7/24/2010 13:24:00 | 23.0 5/27/2010 10:16:01 | 26.179 |
| 5/26/2010 12:27:01 | 24.304 7/24/2010 13:59:00 | 23.0 5/27/2010 10:36:01 | 26.179 |
| 5/26/2010 12:47:01 | 24.304 7/24/2010 14:34:00 | 23.0 5/27/2010 10:56:01 | 26.117 |
| 5/26/2010 13:07:01 | 24.304 7/24/2010 15:09:00 | 23.0 5/27/2010 11:16:01 | 26.117 |
| 5/26/2010 13:27:01 | 24.367 7/24/2010 15:44:00 | 23.5 5/27/2010 11:36:01 | 26.117 |
| 5/26/2010 13:47:01 | 24.367 7/24/2010 16:19:00 | 23.5 5/27/2010 11:56:01 | 26.117 |
| 5/26/2010 14:07:01 | 24.367 7/24/2010 16:54:00 | 23.5 5/27/2010 12:16:01 | 26.117 |
| 5/26/2010 14:27:01 | 24.429 7/24/2010 17:29:00 | 23.5 5/27/2010 12:36:01 | 26.117 |
| 5/26/2010 14:47:01 | 24.429 7/24/2010 18:04:00 | 23.5 5/27/2010 12:56:01 | 26.054 |
| 5/26/2010 15:07:01 | 24.492 7/24/2010 18:39:00 | 23.5 5/27/2010 13:16:01 | 26.054 |
| 5/26/2010 15:27:01 | 24.492 7/24/2010 19:14:00 | 23.5 5/27/2010 13:36:01 | 26.054 |

|                    |        |                    |      |                    |        |
|--------------------|--------|--------------------|------|--------------------|--------|
| 5/26/2010 15:47:01 | 24.554 | 7/24/2010 19:49:00 | 23.5 | 5/27/2010 13:56:01 | 26.054 |
| 5/26/2010 16:07:01 | 24.617 | 7/24/2010 20:24:00 | 23.5 | 5/27/2010 14:16:01 | 26.054 |
| 5/26/2010 16:27:01 | 24.679 | 7/24/2010 20:59:00 | 23.5 | 5/27/2010 14:36:01 | 26.054 |
| 5/26/2010 16:47:01 | 24.679 | 7/24/2010 21:34:00 | 23.5 | 5/27/2010 14:56:01 | 26.054 |
| 5/26/2010 17:07:01 | 24.742 | 7/24/2010 22:09:00 | 23.5 | 5/27/2010 15:16:01 | 26.054 |
| 5/26/2010 17:27:01 | 24.742 | 7/24/2010 22:44:00 | 23.5 | 5/27/2010 15:36:01 | 26.054 |
| 5/26/2010 17:47:01 | 24.804 | 7/24/2010 23:19:00 | 23.5 | 5/27/2010 15:56:01 | 26.054 |
| 5/26/2010 18:07:01 | 24.804 | 7/24/2010 23:54:00 | 23.5 | 5/27/2010 16:16:01 | 26.054 |
| 5/26/2010 18:27:01 | 24.867 | 7/25/2010 00:29:00 | 23.5 | 5/27/2010 16:36:01 | 26.054 |
| 5/26/2010 18:47:01 | 24.867 | 7/25/2010 01:04:00 | 23.5 | 5/27/2010 16:56:01 | 26.054 |
| 5/26/2010 19:07:01 | 24.929 | 7/25/2010 01:39:00 | 23.5 | 5/27/2010 17:16:01 | 26.054 |
| 5/26/2010 19:27:01 | 24.929 | 7/25/2010 02:14:00 | 23.5 | 5/27/2010 17:36:01 | 26.054 |
| 5/26/2010 19:47:01 | 24.929 | 7/25/2010 02:49:00 | 23.5 | 5/27/2010 17:56:01 | 26.117 |
| 5/26/2010 20:07:01 | 24.992 | 7/25/2010 03:24:00 | 23.5 | 5/27/2010 18:16:01 | 26.117 |
| 5/26/2010 20:27:01 | 24.992 | 7/25/2010 03:59:00 | 23.5 | 5/27/2010 18:36:01 | 26.117 |
| 5/26/2010 20:47:01 | 24.992 | 7/25/2010 04:34:00 | 23.5 | 5/27/2010 18:56:01 | 26.117 |
| 5/26/2010 21:07:01 | 24.992 | 7/25/2010 05:09:00 | 23.5 | 5/27/2010 19:16:01 | 26.179 |
| 5/26/2010 21:27:01 | 24.992 | 7/25/2010 05:44:00 | 23.5 | 5/27/2010 19:36:01 | 26.179 |
| 5/26/2010 21:47:01 | 24.992 | 7/25/2010 06:19:00 | 23.5 | 5/27/2010 19:56:01 | 26.179 |
| 5/26/2010 22:07:01 | 24.992 | 7/25/2010 06:54:00 | 23.5 | 5/27/2010 20:16:01 | 26.179 |
| 5/26/2010 22:27:01 | 24.992 | 7/25/2010 07:29:00 | 23.5 | 5/27/2010 20:36:01 | 26.242 |
| 5/26/2010 22:47:01 | 24.992 | 7/25/2010 08:04:00 | 23.0 | 5/27/2010 20:56:01 | 26.242 |
| 5/26/2010 23:07:01 | 24.992 | 7/25/2010 08:39:00 | 23.0 | 5/27/2010 21:16:01 | 26.242 |
| 5/26/2010 23:27:01 | 24.992 | 7/25/2010 09:14:00 | 23.0 | 5/27/2010 21:36:01 | 26.304 |
| 5/26/2010 23:47:01 | 24.992 | 7/25/2010 09:49:00 | 23.0 | 5/27/2010 21:56:01 | 26.304 |
| 5/27/2010 00:07:01 | 24.992 | 7/25/2010 10:24:00 | 23.0 | 5/27/2010 22:16:01 | 26.304 |
| 5/27/2010 00:27:01 | 24.929 | 7/25/2010 10:59:00 | 23.0 | 5/27/2010 22:36:01 | 26.367 |
| 5/27/2010 00:47:01 | 24.929 | 7/25/2010 11:34:00 | 23.0 | 5/27/2010 22:56:01 | 26.367 |
| 5/27/2010 01:07:01 | 24.929 | 7/25/2010 12:09:00 | 23.0 | 5/27/2010 23:16:01 | 26.367 |
| 5/27/2010 01:27:01 | 24.929 | 7/25/2010 12:44:00 | 23.0 | 5/27/2010 23:36:01 | 26.367 |
| 5/27/2010 01:47:01 | 24.929 | 7/25/2010 13:19:00 | 23.0 | 5/27/2010 23:56:01 | 26.367 |
| 5/27/2010 02:07:01 | 24.867 | 7/25/2010 13:54:00 | 23.0 | 5/28/2010 00:16:01 | 26.367 |
| 5/27/2010 02:27:01 | 24.867 | 7/25/2010 14:29:00 | 23.0 | 5/28/2010 00:36:01 | 26.429 |
| 5/27/2010 02:47:01 | 24.867 | 7/25/2010 15:04:00 | 23.0 | 5/28/2010 00:56:01 | 26.367 |
| 5/27/2010 03:07:01 | 24.867 | 7/25/2010 15:39:00 | 23.5 | 5/28/2010 01:16:01 | 26.429 |
| 5/27/2010 03:27:01 | 24.804 | 7/25/2010 16:14:00 | 23.5 | 5/28/2010 01:36:01 | 26.429 |
| 5/27/2010 03:47:01 | 24.804 | 7/25/2010 16:49:00 | 23.5 | 5/28/2010 01:56:01 | 26.429 |
| 5/27/2010 04:07:01 | 24.804 | 7/25/2010 17:24:00 | 23.5 | 5/28/2010 02:16:01 | 26.429 |
| 5/27/2010 04:27:01 | 24.804 | 7/25/2010 17:59:00 | 23.5 | 5/28/2010 02:36:01 | 26.429 |
| 5/27/2010 04:47:01 | 24.742 | 7/25/2010 18:34:00 | 23.5 | 5/28/2010 02:56:01 | 26.429 |
| 5/27/2010 05:07:01 | 24.742 | 7/25/2010 19:09:00 | 23.5 | 5/28/2010 03:16:01 | 26.429 |
| 5/27/2010 05:27:01 | 24.742 | 7/25/2010 19:44:00 | 23.5 | 5/28/2010 03:36:01 | 26.367 |
| 5/27/2010 05:47:01 | 24.742 | 7/25/2010 20:19:00 | 23.5 | 5/28/2010 03:56:01 | 26.367 |
| 5/27/2010 06:07:01 | 24.679 | 7/25/2010 20:54:00 | 23.5 | 5/28/2010 04:16:01 | 26.367 |
| 5/27/2010 06:27:01 | 24.679 | 7/25/2010 21:29:00 | 23.5 | 5/28/2010 04:36:01 | 26.367 |
| 5/27/2010 06:47:01 | 24.679 | 7/25/2010 22:04:00 | 23.5 | 5/28/2010 04:56:01 | 26.367 |
| 5/27/2010 07:07:01 | 24.617 | 7/25/2010 22:39:00 | 23.5 | 5/28/2010 05:16:01 | 26.367 |
| 5/27/2010 07:27:01 | 24.617 | 7/25/2010 23:14:00 | 23.5 | 5/28/2010 05:36:01 | 26.367 |
| 5/27/2010 07:47:01 | 24.617 | 7/25/2010 23:49:00 | 23.5 | 5/28/2010 05:56:01 | 26.367 |
| 5/27/2010 08:07:01 | 24.554 | 7/26/2010 00:24:00 | 23.5 | 5/28/2010 06:16:01 | 26.367 |

|                    |        |                    |      |                    |        |
|--------------------|--------|--------------------|------|--------------------|--------|
| 5/27/2010 08:27:01 | 24.554 | 7/26/2010 00:59:00 | 23.5 | 5/28/2010 06:36:01 | 26.367 |
| 5/27/2010 08:47:01 | 24.554 | 7/26/2010 01:34:00 | 23.5 | 5/28/2010 06:56:01 | 26.367 |
| 5/27/2010 09:07:01 | 24.492 | 7/26/2010 02:09:00 | 23.5 | 5/28/2010 07:16:01 | 26.367 |
| 5/27/2010 09:27:01 | 24.492 | 7/26/2010 02:44:00 | 23.5 | 5/28/2010 07:36:01 | 26.304 |
| 5/27/2010 09:47:01 | 24.492 | 7/26/2010 03:19:00 | 23.0 | 5/28/2010 07:56:01 | 26.304 |
| 5/27/2010 10:07:01 | 24.492 | 7/26/2010 03:54:00 | 23.0 | 5/28/2010 08:16:01 | 26.304 |
| 5/27/2010 10:27:01 | 24.429 | 7/26/2010 04:29:00 | 23.0 | 5/28/2010 08:36:01 | 26.304 |
| 5/27/2010 10:47:01 | 24.429 | 7/26/2010 05:04:00 | 23.0 | 5/28/2010 08:56:01 | 26.304 |
| 5/27/2010 11:07:01 | 24.429 | 7/26/2010 05:39:00 | 23.0 | 5/28/2010 09:16:01 | 26.304 |
| 5/27/2010 11:27:01 | 24.429 | 7/26/2010 06:14:00 | 23.0 | 5/28/2010 09:36:01 | 26.304 |
| 5/27/2010 11:47:01 | 24.429 | 7/26/2010 06:49:00 | 23.0 | 5/28/2010 09:56:01 | 26.304 |
| 5/27/2010 12:07:01 | 24.429 | 7/26/2010 07:24:00 | 23.0 | 5/28/2010 10:16:01 | 26.242 |
| 5/27/2010 12:27:01 | 24.429 | 7/26/2010 07:59:00 | 23.0 | 5/28/2010 10:36:01 | 26.242 |
| 5/27/2010 12:47:01 | 24.429 | 7/26/2010 08:34:00 | 23.0 | 5/28/2010 10:56:01 | 26.242 |
| 5/27/2010 13:07:01 | 24.429 | 7/26/2010 09:09:00 | 23.0 | 5/28/2010 11:16:01 | 26.242 |
| 5/27/2010 13:27:01 | 24.429 | 7/26/2010 09:44:00 | 22.5 | 5/28/2010 11:36:01 | 26.242 |
| 5/27/2010 13:47:01 | 24.429 | 7/26/2010 10:19:00 | 22.5 | 5/28/2010 11:56:01 | 26.242 |
| 5/27/2010 14:07:01 | 24.492 | 7/26/2010 10:54:00 | 22.5 | 5/28/2010 12:16:01 | 26.242 |
| 5/27/2010 14:27:01 | 24.492 | 7/26/2010 11:29:00 | 22.5 | 5/28/2010 12:36:01 | 26.179 |
| 5/27/2010 14:47:01 | 24.554 | 7/26/2010 12:04:00 | 22.5 | 5/28/2010 12:56:01 | 26.179 |
| 5/27/2010 15:07:01 | 24.554 | 7/26/2010 12:39:00 | 22.5 | 5/28/2010 13:16:01 | 26.179 |
| 5/27/2010 15:27:01 | 24.617 | 7/26/2010 13:14:00 | 22.5 | 5/28/2010 13:36:01 | 26.179 |
| 5/27/2010 15:47:01 | 24.679 | 7/26/2010 13:49:00 | 23.0 | 5/28/2010 13:56:01 | 26.179 |
| 5/27/2010 16:07:01 | 24.679 | 7/26/2010 14:24:00 | 23.0 | 5/28/2010 14:16:01 | 26.179 |
| 5/27/2010 16:27:01 | 24.742 | 7/26/2010 14:59:00 | 23.0 | 5/28/2010 14:36:01 | 26.179 |
| 5/27/2010 16:47:01 | 24.804 | 7/26/2010 15:34:00 | 23.0 | 5/28/2010 14:56:01 | 26.179 |
| 5/27/2010 17:07:01 | 24.804 | 7/26/2010 16:09:00 | 23.0 | 5/28/2010 15:16:01 | 26.179 |
| 5/27/2010 17:27:01 | 24.867 | 7/26/2010 16:44:00 | 23.0 | 5/28/2010 15:36:01 | 26.179 |
| 5/27/2010 17:47:01 | 24.867 | 7/26/2010 17:19:00 | 23.0 | 5/28/2010 15:56:01 | 26.179 |
| 5/27/2010 18:07:01 | 24.929 | 7/26/2010 17:54:00 | 23.0 | 5/28/2010 16:16:01 | 26.179 |
| 5/27/2010 18:27:01 | 24.992 | 7/26/2010 18:29:00 | 23.0 | 5/28/2010 16:36:01 | 26.242 |
| 5/27/2010 18:47:01 | 24.992 | 7/26/2010 19:04:00 | 23.0 | 5/28/2010 16:56:01 | 26.242 |
| 5/27/2010 19:07:01 | 24.992 | 7/26/2010 19:39:00 | 23.0 | 5/28/2010 17:16:01 | 26.242 |
| 5/27/2010 19:27:01 | 25.054 | 7/26/2010 20:14:00 | 23.0 | 5/28/2010 17:36:01 | 26.242 |
| 5/27/2010 19:47:01 | 25.054 | 7/26/2010 20:49:00 | 23.5 | 5/28/2010 17:56:01 | 26.242 |
| 5/27/2010 20:07:01 | 25.054 | 7/26/2010 21:24:00 | 23.5 | 5/28/2010 18:16:01 | 26.242 |
| 5/27/2010 20:27:01 | 25.054 | 7/26/2010 21:59:00 | 23.5 | 5/28/2010 18:36:01 | 26.304 |
| 5/27/2010 20:47:01 | 25.117 | 7/26/2010 22:34:00 | 23.5 | 5/28/2010 18:56:01 | 26.304 |
| 5/27/2010 21:07:01 | 25.117 | 7/26/2010 23:09:00 | 23.5 | 5/28/2010 19:16:01 | 26.304 |
| 5/27/2010 21:27:01 | 25.117 | 7/26/2010 23:44:00 | 23.5 | 5/28/2010 19:36:01 | 26.304 |
| 5/27/2010 21:47:01 | 25.117 | 7/27/2010 00:19:00 | 23.5 | 5/28/2010 19:56:01 | 26.367 |
| 5/27/2010 22:07:01 | 25.117 | 7/27/2010 00:54:00 | 23.5 | 5/28/2010 20:16:01 | 26.367 |
| 5/27/2010 22:27:01 | 25.117 | 7/27/2010 01:29:00 | 23.5 | 5/28/2010 20:36:01 | 26.367 |
| 5/27/2010 22:47:01 | 25.117 | 7/27/2010 02:04:00 | 23.5 | 5/28/2010 20:56:01 | 26.429 |
| 5/27/2010 23:07:01 | 25.117 | 7/27/2010 02:39:00 | 23.5 | 5/28/2010 21:16:01 | 26.429 |
| 5/27/2010 23:27:01 | 25.117 | 7/27/2010 03:14:00 | 23.5 | 5/28/2010 21:36:01 | 26.429 |
| 5/27/2010 23:47:01 | 25.117 | 7/27/2010 03:49:00 | 23.5 | 5/28/2010 21:56:01 | 26.429 |
| 5/28/2010 00:07:01 | 25.054 | 7/27/2010 04:24:00 | 23.5 | 5/28/2010 22:16:01 | 26.429 |
| 5/28/2010 00:27:01 | 25.054 | 7/27/2010 04:59:00 | 23.5 | 5/28/2010 22:36:01 | 26.492 |
| 5/28/2010 00:47:01 | 25.054 | 7/27/2010 05:34:00 | 23.0 | 5/28/2010 22:56:01 | 26.492 |



|                    |        |                    |      |                    |        |
|--------------------|--------|--------------------|------|--------------------|--------|
| 5/28/2010 01:07:01 | 25.054 | 7/27/2010 06:09:00 | 23.0 | 5/28/2010 23:16:01 | 26.492 |
| 5/28/2010 01:27:01 | 25.054 | 7/27/2010 06:44:00 | 23.0 | 5/28/2010 23:36:01 | 26.492 |
| 5/28/2010 01:47:01 | 25.054 | 7/27/2010 07:19:00 | 23.0 | 5/28/2010 23:56:01 | 26.492 |
| 5/28/2010 02:07:01 | 25.054 | 7/27/2010 07:54:00 | 23.0 | 5/29/2010 00:16:01 | 26.492 |
| 5/28/2010 02:27:01 | 24.992 | 7/27/2010 08:29:00 | 23.0 | 5/29/2010 00:36:01 | 26.492 |
| 5/28/2010 02:47:01 | 24.992 | 7/27/2010 09:04:00 | 23.0 | 5/29/2010 00:56:01 | 26.554 |
| 5/28/2010 03:07:01 | 24.992 | 7/27/2010 09:39:00 | 23.0 | 5/29/2010 01:16:01 | 26.554 |
| 5/28/2010 03:27:01 | 24.992 | 7/27/2010 10:14:00 | 23.0 | 5/29/2010 01:36:01 | 26.554 |
| 5/28/2010 03:47:01 | 24.992 | 7/27/2010 10:49:00 | 23.0 | 5/29/2010 01:56:01 | 26.554 |
| 5/28/2010 04:07:01 | 24.992 | 7/27/2010 11:24:00 | 23.0 | 5/29/2010 02:16:01 | 26.554 |
| 5/28/2010 04:27:01 | 24.929 | 7/27/2010 11:59:00 | 23.0 | 5/29/2010 02:36:01 | 26.554 |
| 5/28/2010 04:47:01 | 24.929 | 7/27/2010 12:34:00 | 23.0 | 5/29/2010 02:56:01 | 26.554 |
| 5/28/2010 05:07:01 | 24.929 | 7/27/2010 13:09:00 | 23.0 | 5/29/2010 03:16:01 | 26.554 |
| 5/28/2010 05:27:01 | 24.929 | 7/27/2010 13:44:00 | 23.0 | 5/29/2010 03:36:01 | 26.554 |
| 5/28/2010 05:47:01 | 24.929 | 7/27/2010 14:19:00 | 23.0 | 5/29/2010 03:56:01 | 26.554 |
| 5/28/2010 06:07:01 | 24.929 | 7/27/2010 14:54:00 | 23.0 | 5/29/2010 04:16:01 | 26.554 |
| 5/28/2010 06:27:01 | 24.867 | 7/27/2010 15:29:00 | 23.5 | 5/29/2010 04:36:01 | 26.554 |
| 5/28/2010 06:47:01 | 24.867 | 7/27/2010 16:04:00 | 23.5 | 5/29/2010 04:56:01 | 26.554 |
| 5/28/2010 07:07:01 | 24.867 | 7/27/2010 16:39:00 | 23.5 | 5/29/2010 05:16:01 | 26.492 |
| 5/28/2010 07:27:01 | 24.867 | 7/27/2010 17:14:00 | 23.5 | 5/29/2010 05:36:01 | 26.492 |
| 5/28/2010 07:47:01 | 24.867 | 7/27/2010 17:49:00 | 23.5 | 5/29/2010 05:56:01 | 26.492 |
| 5/28/2010 08:07:01 | 24.867 | 7/27/2010 18:24:00 | 23.5 | 5/29/2010 06:16:01 | 26.492 |
| 5/28/2010 08:27:01 | 24.804 | 7/27/2010 18:59:00 | 23.5 | 5/29/2010 06:36:01 | 26.492 |
| 5/28/2010 08:47:01 | 24.804 | 7/27/2010 19:34:00 | 23.5 | 5/29/2010 06:56:01 | 26.492 |
| 5/28/2010 09:07:01 | 24.804 | 7/27/2010 20:09:00 | 23.5 | 5/29/2010 07:16:01 | 26.492 |
| 5/28/2010 09:27:01 | 24.804 | 7/27/2010 20:44:00 | 23.5 | 5/29/2010 07:36:01 | 26.492 |
| 5/28/2010 09:47:01 | 24.804 | 7/27/2010 21:19:00 | 23.5 | 5/29/2010 07:56:01 | 26.429 |
| 5/28/2010 10:07:01 | 24.742 | 7/27/2010 21:54:00 | 23.5 | 5/29/2010 08:16:01 | 26.429 |
| 5/28/2010 10:27:01 | 24.742 | 7/27/2010 22:29:00 | 23.5 | 5/29/2010 08:36:01 | 26.429 |
| 5/28/2010 10:47:01 | 24.742 | 7/27/2010 23:04:00 | 23.5 | 5/29/2010 08:56:01 | 26.429 |
| 5/28/2010 11:07:01 | 24.742 | 7/27/2010 23:39:00 | 23.5 | 5/29/2010 09:16:01 | 26.429 |
| 5/28/2010 11:27:01 | 24.742 | 7/28/2010 00:14:00 | 23.5 | 5/29/2010 09:36:01 | 26.429 |
| 5/28/2010 11:47:01 | 24.742 | 7/28/2010 00:49:00 | 23.5 | 5/29/2010 09:56:01 | 26.367 |
| 5/28/2010 12:07:01 | 24.742 | 7/28/2010 01:24:00 | 23.5 | 5/29/2010 10:16:01 | 26.367 |
| 5/28/2010 12:27:01 | 24.742 | 7/28/2010 01:59:00 | 23.5 | 5/29/2010 10:36:01 | 26.367 |
| 5/28/2010 12:47:01 | 24.742 | 7/28/2010 02:34:00 | 23.5 | 5/29/2010 10:56:01 | 26.367 |
| 5/28/2010 13:07:01 | 24.804 | 7/28/2010 03:09:00 | 23.5 | 5/29/2010 11:16:01 | 26.304 |
| 5/28/2010 13:27:01 | 24.804 | 7/28/2010 03:44:00 | 23.5 | 5/29/2010 11:36:01 | 26.304 |
| 5/28/2010 13:47:01 | 24.804 | 7/28/2010 04:19:00 | 23.5 | 5/29/2010 11:56:01 | 26.304 |
| 5/28/2010 14:07:01 | 24.867 | 7/28/2010 04:54:00 | 23.5 | 5/29/2010 12:16:01 | 26.304 |
| 5/28/2010 14:27:01 | 24.867 | 7/28/2010 05:29:00 | 23.5 | 5/29/2010 12:36:01 | 26.304 |
| 5/28/2010 14:47:01 | 24.929 | 7/28/2010 06:04:00 | 23.0 | 5/29/2010 12:56:01 | 26.304 |
| 5/28/2010 15:07:01 | 24.929 | 7/28/2010 06:39:00 | 23.0 | 5/29/2010 13:16:01 | 26.242 |
| 5/28/2010 15:27:01 | 24.992 | 7/28/2010 07:14:00 | 23.0 | 5/29/2010 13:36:01 | 26.242 |
| 5/28/2010 15:47:01 | 24.992 | 7/28/2010 07:49:00 | 23.0 | 5/29/2010 13:56:01 | 26.242 |
| 5/28/2010 16:07:01 | 25.054 | 7/28/2010 08:24:00 | 23.0 | 5/29/2010 14:16:01 | 26.242 |
| 5/28/2010 16:27:01 | 25.117 | 7/28/2010 08:59:00 | 23.0 | 5/29/2010 14:36:01 | 26.242 |
| 5/28/2010 16:47:01 | 25.117 | 7/28/2010 09:34:00 | 23.0 | 5/29/2010 14:56:01 | 26.242 |
| 5/28/2010 17:07:01 | 25.179 | 7/28/2010 10:09:00 | 23.0 | 5/29/2010 15:16:01 | 26.242 |
| 5/28/2010 17:27:01 | 25.242 | 7/28/2010 10:44:00 | 23.0 | 5/29/2010 15:36:01 | 26.242 |

|                    |        |                    |      |                    |        |
|--------------------|--------|--------------------|------|--------------------|--------|
| 5/28/2010 17:47:01 | 25.242 | 7/28/2010 11:19:00 | 23.0 | 5/29/2010 15:56:01 | 26.242 |
| 5/28/2010 18:07:01 | 25.304 | 7/28/2010 11:54:00 | 23.0 | 5/29/2010 16:16:01 | 26.242 |
| 5/28/2010 18:27:01 | 25.304 | 7/28/2010 12:29:00 | 23.0 | 5/29/2010 16:36:01 | 26.242 |
| 5/28/2010 18:47:01 | 25.304 | 7/28/2010 13:04:00 | 23.0 | 5/29/2010 16:56:01 | 26.242 |
| 5/28/2010 19:07:01 | 25.367 | 7/28/2010 13:39:00 | 23.0 | 5/29/2010 17:16:01 | 26.242 |
| 5/28/2010 19:27:01 | 25.367 | 7/28/2010 14:14:00 | 23.0 | 5/29/2010 17:36:01 | 26.242 |
| 5/28/2010 19:47:01 | 25.367 | 7/28/2010 14:49:00 | 23.0 | 5/29/2010 17:56:01 | 26.242 |
| 5/28/2010 20:07:01 | 25.429 | 7/28/2010 15:24:00 | 23.0 | 5/29/2010 18:16:01 | 26.242 |
| 5/28/2010 20:27:01 | 25.429 | 7/28/2010 15:59:00 | 23.0 | 5/29/2010 18:36:01 | 26.304 |
| 5/28/2010 20:47:01 | 25.429 | 7/28/2010 16:34:00 | 23.5 | 5/29/2010 18:56:01 | 26.304 |
| 5/28/2010 21:07:01 | 25.429 | 7/28/2010 17:09:00 | 23.5 | 5/29/2010 19:16:01 | 26.304 |
| 5/28/2010 21:27:01 | 25.429 | 7/28/2010 17:44:00 | 23.5 | 5/29/2010 19:36:01 | 26.304 |
| 5/28/2010 21:47:01 | 25.429 | 7/28/2010 18:19:00 | 23.5 | 5/29/2010 19:56:01 | 26.304 |
| 5/28/2010 22:07:01 | 25.429 | 7/28/2010 18:54:00 | 23.5 | 5/29/2010 20:16:01 | 26.367 |
| 5/28/2010 22:27:01 | 25.429 | 7/28/2010 19:29:00 | 23.5 | 5/29/2010 20:36:01 | 26.367 |
| 5/28/2010 22:47:01 | 25.429 | 7/28/2010 20:04:00 | 23.5 | 5/29/2010 20:56:01 | 26.367 |
| 5/28/2010 23:07:01 | 25.367 | 7/28/2010 20:39:00 | 23.5 | 5/29/2010 21:16:01 | 26.367 |
| 5/28/2010 23:27:01 | 25.367 | 7/28/2010 21:14:00 | 23.5 | 5/29/2010 21:36:01 | 26.429 |
| 5/28/2010 23:47:01 | 25.367 | 7/28/2010 21:49:00 | 23.5 | 5/29/2010 21:56:01 | 26.429 |
| 5/29/2010 00:07:01 | 25.367 | 7/28/2010 22:24:00 | 23.5 | 5/29/2010 22:16:01 | 26.429 |
| 5/29/2010 00:27:01 | 25.367 | 7/28/2010 22:59:00 | 23.5 | 5/29/2010 22:36:01 | 26.429 |
| 5/29/2010 00:47:01 | 25.304 | 7/28/2010 23:34:00 | 23.5 | 5/29/2010 22:56:01 | 26.429 |
| 5/29/2010 01:07:01 | 25.304 | 7/29/2010 00:09:00 | 23.5 | 5/29/2010 23:16:01 | 26.429 |
| 5/29/2010 01:27:01 | 25.304 | 7/29/2010 00:44:00 | 23.5 | 5/29/2010 23:36:01 | 26.429 |
| 5/29/2010 01:47:01 | 25.304 | 7/29/2010 01:19:00 | 23.5 | 5/29/2010 23:56:01 | 26.429 |
| 5/29/2010 02:07:01 | 25.242 | 7/29/2010 01:54:00 | 23.5 | 5/30/2010 00:16:01 | 26.429 |
| 5/29/2010 02:27:01 | 25.242 | 7/29/2010 02:29:00 | 23.5 | 5/30/2010 00:36:01 | 26.429 |
| 5/29/2010 02:47:01 | 25.242 | 7/29/2010 03:04:00 | 23.5 | 5/30/2010 00:56:01 | 26.429 |
| 5/29/2010 03:07:01 | 25.242 | 7/29/2010 03:39:00 | 23.5 | 5/30/2010 01:16:01 | 26.492 |
| 5/29/2010 03:27:01 | 25.242 | 7/29/2010 04:14:00 | 23.5 | 5/30/2010 01:36:01 | 26.492 |
| 5/29/2010 03:47:01 | 25.179 | 7/29/2010 04:49:00 | 23.5 | 5/30/2010 01:56:01 | 26.429 |
| 5/29/2010 04:07:01 | 25.179 | 7/29/2010 05:24:00 | 23.5 | 5/30/2010 02:16:01 | 26.429 |
| 5/29/2010 04:27:01 | 25.179 | 7/29/2010 05:59:00 | 23.5 | 5/30/2010 02:36:01 | 26.429 |
| 5/29/2010 04:47:01 | 25.179 | 7/29/2010 06:34:00 | 23.5 | 5/30/2010 02:56:01 | 26.429 |
| 5/29/2010 05:07:01 | 25.117 | 7/29/2010 07:09:00 | 23.5 | 5/30/2010 03:16:01 | 26.429 |
| 5/29/2010 05:27:01 | 25.117 | 7/29/2010 07:44:00 | 23.0 | 5/30/2010 03:36:01 | 26.429 |
| 5/29/2010 05:47:01 | 25.054 | 7/29/2010 08:19:00 | 23.0 | 5/30/2010 03:56:01 | 26.429 |
| 5/29/2010 06:07:01 | 25.054 | 7/29/2010 08:54:00 | 23.0 | 5/30/2010 04:16:01 | 26.429 |
| 5/29/2010 06:27:01 | 25.054 | 7/29/2010 09:29:00 | 23.0 | 5/30/2010 04:36:01 | 26.429 |
| 5/29/2010 06:47:01 | 25.054 | 7/29/2010 10:04:00 | 23.0 | 5/30/2010 04:56:01 | 26.429 |
| 5/29/2010 07:07:01 | 24.992 | 7/29/2010 10:39:00 | 23.0 | 5/30/2010 05:16:01 | 26.429 |
| 5/29/2010 07:27:01 | 24.992 | 7/29/2010 11:14:00 | 23.0 | 5/30/2010 05:36:01 | 26.429 |
| 5/29/2010 07:47:01 | 24.929 | 7/29/2010 11:49:00 | 23.0 | 5/30/2010 05:56:01 | 26.367 |
| 5/29/2010 08:07:01 | 24.929 | 7/29/2010 12:24:00 | 23.0 | 5/30/2010 06:16:01 | 26.367 |
| 5/29/2010 08:27:01 | 24.929 | 7/29/2010 12:59:00 | 23.0 | 5/30/2010 06:36:01 | 26.367 |
| 5/29/2010 08:47:01 | 24.867 | 7/29/2010 13:34:00 | 23.0 | 5/30/2010 06:56:01 | 26.367 |
| 5/29/2010 09:07:01 | 24.867 | 7/29/2010 14:09:00 | 23.0 | 5/30/2010 07:16:01 | 26.367 |
| 5/29/2010 09:27:01 | 24.867 | 7/29/2010 14:44:00 | 23.0 | 5/30/2010 07:36:01 | 26.304 |
| 5/29/2010 09:47:01 | 24.804 | 7/29/2010 15:19:00 | 23.0 | 5/30/2010 07:56:01 | 26.304 |
| 5/29/2010 10:07:01 | 24.804 | 7/29/2010 15:54:00 | 23.5 | 5/30/2010 08:16:01 | 26.304 |

|                    |        |                    |      |                    |        |
|--------------------|--------|--------------------|------|--------------------|--------|
| 5/29/2010 10:27:01 | 24.804 | 7/29/2010 16:29:00 | 23.5 | 5/30/2010 08:36:01 | 26.304 |
| 5/29/2010 10:47:01 | 24.742 | 7/29/2010 17:04:00 | 23.5 | 5/30/2010 08:56:01 | 26.304 |
| 5/29/2010 11:07:01 | 24.742 | 7/29/2010 17:39:00 | 23.5 | 5/30/2010 09:16:01 | 26.242 |
| 5/29/2010 11:27:01 | 24.742 | 7/29/2010 18:14:00 | 23.5 | 5/30/2010 09:36:01 | 26.242 |
| 5/29/2010 11:47:01 | 24.742 | 7/29/2010 18:49:00 | 23.5 | 5/30/2010 09:56:01 | 26.242 |
| 5/29/2010 12:07:01 | 24.742 | 7/29/2010 19:24:00 | 23.5 | 5/30/2010 10:16:01 | 26.242 |
| 5/29/2010 12:27:01 | 24.742 | 7/29/2010 19:59:00 | 23.5 | 5/30/2010 10:36:01 | 26.179 |
| 5/29/2010 12:47:01 | 24.742 | 7/29/2010 20:34:00 | 23.5 | 5/30/2010 10:56:01 | 26.179 |
| 5/29/2010 13:07:01 | 24.742 | 7/29/2010 21:09:00 | 23.5 | 5/30/2010 11:16:01 | 26.179 |
| 5/29/2010 13:27:01 | 24.742 | 7/29/2010 21:44:00 | 23.5 | 5/30/2010 11:36:01 | 26.179 |
| 5/29/2010 13:47:01 | 24.742 | 7/29/2010 22:19:00 | 23.5 | 5/30/2010 11:56:01 | 26.117 |
| 5/29/2010 14:07:01 | 24.804 | 7/29/2010 22:54:00 | 23.5 | 5/30/2010 12:16:01 | 26.117 |
| 5/29/2010 14:27:01 | 24.804 | 7/29/2010 23:29:00 | 23.5 | 5/30/2010 12:36:01 | 26.117 |
| 5/29/2010 14:47:01 | 24.867 | 7/30/2010 00:04:00 | 23.5 | 5/30/2010 12:56:01 | 26.117 |
| 5/29/2010 15:07:01 | 24.867 | 7/30/2010 00:39:00 | 23.5 | 5/30/2010 13:16:01 | 26.054 |
| 5/29/2010 15:27:01 | 24.929 | 7/30/2010 01:14:00 | 23.0 | 5/30/2010 13:36:01 | 26.054 |
| 5/29/2010 15:47:01 | 24.929 | 7/30/2010 01:49:00 | 23.0 | 5/30/2010 13:56:01 | 26.054 |
| 5/29/2010 16:07:01 | 24.992 | 7/30/2010 02:24:00 | 23.0 | 5/30/2010 14:16:01 | 26.054 |
| 5/29/2010 16:27:01 | 25.054 | 7/30/2010 02:59:00 | 23.0 | 5/30/2010 14:36:01 | 26.054 |
| 5/29/2010 16:47:01 | 25.054 | 7/30/2010 03:34:00 | 23.0 | 5/30/2010 14:56:01 | 26.054 |
| 5/29/2010 17:07:01 | 25.117 | 7/30/2010 04:09:00 | 23.0 | 5/30/2010 15:16:01 | 26.054 |
| 5/29/2010 17:27:01 | 25.117 | 7/30/2010 04:44:00 | 23.0 | 5/30/2010 15:36:01 | 26.054 |
| 5/29/2010 17:47:01 | 25.179 | 7/30/2010 05:19:00 | 23.0 | 5/30/2010 15:56:01 | 26.054 |
| 5/29/2010 18:07:01 | 25.179 | 7/30/2010 05:54:00 | 23.0 | 5/30/2010 16:16:01 | 26.054 |
| 5/29/2010 18:27:01 | 25.242 | 7/30/2010 06:29:00 | 23.0 | 5/30/2010 16:36:01 | 26.054 |
| 5/29/2010 18:47:01 | 25.242 | 7/30/2010 07:04:00 | 23.0 | 5/30/2010 16:56:01 | 26.054 |
| 5/29/2010 19:07:01 | 25.304 | 7/30/2010 07:39:00 | 23.0 | 5/30/2010 17:16:01 | 26.054 |
| 5/29/2010 19:27:01 | 25.304 | 7/30/2010 08:14:00 | 23.0 | 5/30/2010 17:36:01 | 26.054 |
| 5/29/2010 19:47:01 | 25.304 | 7/30/2010 08:49:00 | 22.5 | 5/30/2010 17:56:01 | 26.054 |
| 5/29/2010 20:07:01 | 25.304 | 7/30/2010 09:24:00 | 22.5 | 5/30/2010 18:16:01 | 26.054 |
| 5/29/2010 20:27:01 | 25.304 | 7/30/2010 09:59:00 | 22.5 | 5/30/2010 18:36:01 | 26.054 |
| 5/29/2010 20:47:01 | 25.304 | 7/30/2010 10:34:00 | 22.5 | 5/30/2010 18:56:01 | 26.117 |
| 5/29/2010 21:07:01 | 25.367 | 7/30/2010 11:09:00 | 22.5 | 5/30/2010 19:16:01 | 26.117 |
| 5/29/2010 21:27:01 | 25.304 | 7/30/2010 11:44:00 | 22.5 | 5/30/2010 19:36:01 | 26.117 |
| 5/29/2010 21:47:01 | 25.304 | 7/30/2010 12:19:00 | 22.5 | 5/30/2010 19:56:01 | 26.117 |
| 5/29/2010 22:07:01 | 25.304 | 7/30/2010 12:54:00 | 22.5 | 5/30/2010 20:16:01 | 26.117 |
| 5/29/2010 22:27:01 | 25.304 | 7/30/2010 13:29:00 | 22.5 | 5/30/2010 20:36:01 | 26.179 |
| 5/29/2010 22:47:01 | 25.304 | 7/30/2010 14:04:00 | 23.0 | 5/30/2010 20:56:01 | 26.179 |
| 5/29/2010 23:07:01 | 25.242 | 7/30/2010 14:39:00 | 23.0 | 5/30/2010 21:16:01 | 26.179 |
| 5/29/2010 23:27:01 | 25.242 | 7/30/2010 15:14:00 | 23.0 | 5/30/2010 21:36:01 | 26.179 |
| 5/29/2010 23:47:01 | 25.242 | 7/30/2010 15:49:00 | 23.0 | 5/30/2010 21:56:01 | 26.179 |
| 5/30/2010 00:07:01 | 25.242 | 7/30/2010 16:24:00 | 23.0 | 5/30/2010 22:16:01 | 26.242 |
| 5/30/2010 00:27:01 | 25.179 | 7/30/2010 16:59:00 | 23.0 | 5/30/2010 22:36:01 | 26.242 |
| 5/30/2010 00:47:01 | 25.179 | 7/30/2010 17:34:00 | 23.0 | 5/30/2010 22:56:01 | 26.242 |
| 5/30/2010 01:07:01 | 25.179 | 7/30/2010 18:09:00 | 23.5 | 5/30/2010 23:16:01 | 26.242 |
| 5/30/2010 01:27:01 | 25.117 | 7/30/2010 18:44:00 | 23.5 | 5/30/2010 23:36:01 | 26.242 |
| 5/30/2010 01:47:01 | 25.117 | 7/30/2010 19:19:00 | 23.5 | 5/30/2010 23:56:01 | 26.242 |
| 5/30/2010 02:07:01 | 25.117 | 7/30/2010 19:54:00 | 23.5 | 5/31/2010 00:16:01 | 26.242 |
| 5/30/2010 02:27:01 | 25.054 | 7/30/2010 20:29:00 | 23.5 | 5/31/2010 00:36:01 | 26.242 |
| 5/30/2010 02:47:01 | 25.054 | 7/30/2010 21:04:00 | 23.5 | 5/31/2010 00:56:01 | 26.242 |

|                    |        |                    |      |                    |        |
|--------------------|--------|--------------------|------|--------------------|--------|
| 5/30/2010 03:07:01 | 25.054 | 7/30/2010 21:39:00 | 23.5 | 5/31/2010 01:16:01 | 26.304 |
| 5/30/2010 03:27:01 | 24.992 | 7/30/2010 22:14:00 | 23.5 | 5/31/2010 01:36:01 | 26.242 |
| 5/30/2010 03:47:01 | 24.992 | 7/30/2010 22:49:00 | 23.0 | 5/31/2010 01:56:01 | 26.304 |
| 5/30/2010 04:07:01 | 24.992 | 7/30/2010 23:24:00 | 23.0 | 5/31/2010 02:16:01 | 26.242 |
| 5/30/2010 04:27:01 | 24.929 | 7/30/2010 23:59:00 | 23.0 | 5/31/2010 02:36:01 | 26.242 |
| 5/30/2010 04:47:01 | 24.929 | 7/31/2010 00:34:00 | 23.0 | 5/31/2010 02:56:01 | 26.242 |
| 5/30/2010 05:07:01 | 24.929 | 7/31/2010 01:09:00 | 23.0 | 5/31/2010 03:16:01 | 26.242 |
| 5/30/2010 05:27:01 | 24.867 | 7/31/2010 01:44:00 | 23.0 | 5/31/2010 03:36:01 | 26.242 |
| 5/30/2010 05:47:01 | 24.867 | 7/31/2010 02:19:00 | 23.0 | 5/31/2010 03:56:01 | 26.242 |
| 5/30/2010 06:07:01 | 24.804 | 7/31/2010 02:54:00 | 23.0 | 5/31/2010 04:16:01 | 26.242 |
| 5/30/2010 06:27:01 | 24.804 | 7/31/2010 03:29:00 | 23.0 | 5/31/2010 04:36:01 | 26.242 |
| 5/30/2010 06:47:01 | 24.804 | 7/31/2010 04:04:00 | 23.0 | 5/31/2010 04:56:01 | 26.242 |
| 5/30/2010 07:07:01 | 24.742 | 7/31/2010 04:39:00 | 23.0 | 5/31/2010 05:16:01 | 26.242 |
| 5/30/2010 07:27:01 | 24.742 | 7/31/2010 05:14:00 | 23.0 | 5/31/2010 05:36:01 | 26.242 |
| 5/30/2010 07:47:01 | 24.742 | 7/31/2010 05:49:00 | 23.0 | 5/31/2010 05:56:01 | 26.242 |
| 5/30/2010 08:07:01 | 24.679 | 7/31/2010 06:24:00 | 23.0 | 5/31/2010 06:16:01 | 26.179 |
| 5/30/2010 08:27:01 | 24.679 | 7/31/2010 06:59:00 | 23.0 | 5/31/2010 06:36:01 | 26.179 |
| 5/30/2010 08:47:01 | 24.617 | 7/31/2010 07:34:00 | 23.0 | 5/31/2010 06:56:01 | 26.179 |
| 5/30/2010 09:07:01 | 24.617 | 7/31/2010 08:09:00 | 22.5 | 5/31/2010 07:16:01 | 26.179 |
| 5/30/2010 09:27:01 | 24.617 | 7/31/2010 08:44:00 | 22.5 | 5/31/2010 07:36:01 | 26.179 |
| 5/30/2010 09:47:01 | 24.554 | 7/31/2010 09:19:00 | 22.5 | 5/31/2010 07:56:01 | 26.179 |
| 5/30/2010 10:07:01 | 24.554 | 7/31/2010 09:54:00 | 22.5 | 5/31/2010 08:16:01 | 26.117 |
| 5/30/2010 10:27:01 | 24.554 | 7/31/2010 10:29:00 | 22.5 | 5/31/2010 08:36:01 | 26.117 |
| 5/30/2010 10:47:01 | 24.492 | 7/31/2010 11:04:00 | 22.5 | 5/31/2010 08:56:01 | 26.117 |
| 5/30/2010 11:07:01 | 24.492 | 7/31/2010 11:39:00 | 22.5 | 5/31/2010 09:16:01 | 26.117 |
| 5/30/2010 11:27:01 | 24.492 | 7/31/2010 12:14:00 | 22.5 | 5/31/2010 09:36:01 | 26.054 |
| 5/30/2010 11:47:01 | 24.492 | 7/31/2010 12:49:00 | 22.5 | 5/31/2010 09:56:01 | 26.054 |
| 5/30/2010 12:07:01 | 24.492 | 7/31/2010 13:24:00 | 22.5 | 5/31/2010 10:16:01 | 26.054 |
| 5/30/2010 12:27:01 | 24.429 | 7/31/2010 13:59:00 | 22.5 | 5/31/2010 10:36:01 | 26.054 |
| 5/30/2010 12:47:01 | 24.492 | 7/31/2010 14:34:00 | 23.0 | 5/31/2010 10:56:01 | 26.054 |
| 5/30/2010 13:07:01 | 24.492 | 7/31/2010 15:09:00 | 23.0 | 5/31/2010 11:16:01 | 25.992 |
| 5/30/2010 13:27:01 | 24.492 | 7/31/2010 15:44:00 | 23.0 | 5/31/2010 11:36:01 | 25.992 |
| 5/30/2010 13:47:01 | 24.492 | 7/31/2010 16:19:00 | 23.0 | 5/31/2010 11:56:01 | 25.992 |
| 5/30/2010 14:07:01 | 24.492 | 7/31/2010 16:54:00 | 23.0 | 5/31/2010 12:16:01 | 25.992 |
| 5/30/2010 14:27:01 | 24.554 | 7/31/2010 17:29:00 | 23.0 | 5/31/2010 12:36:01 | 25.929 |
| 5/30/2010 14:47:01 | 24.554 | 7/31/2010 18:04:00 | 23.0 | 5/31/2010 12:56:01 | 25.929 |
| 5/30/2010 15:07:01 | 24.617 | 7/31/2010 18:39:00 | 23.0 | 5/31/2010 13:16:01 | 25.929 |
| 5/30/2010 15:27:01 | 24.617 | 7/31/2010 19:14:00 | 23.0 | 5/31/2010 13:36:01 | 25.929 |
| 5/30/2010 15:47:01 | 24.679 | 7/31/2010 19:49:00 | 23.0 | 5/31/2010 13:56:01 | 25.929 |
| 5/30/2010 16:07:01 | 24.679 | 7/31/2010 20:24:00 | 23.0 | 5/31/2010 14:16:01 | 25.929 |
| 5/30/2010 16:27:01 | 24.742 | 7/31/2010 20:59:00 | 23.0 | 5/31/2010 14:36:01 | 25.929 |
| 5/30/2010 16:47:01 | 24.804 | 7/31/2010 21:34:00 | 23.0 | 5/31/2010 14:56:01 | 25.929 |
| 5/30/2010 17:07:01 | 24.804 | 7/31/2010 22:09:00 | 23.0 | 5/31/2010 15:16:01 | 25.929 |
| 5/30/2010 17:27:01 | 24.867 | 7/31/2010 22:44:00 | 23.0 | 5/31/2010 15:36:01 | 25.929 |
| 5/30/2010 17:47:01 | 24.867 | 7/31/2010 23:19:00 | 23.0 | 5/31/2010 15:56:01 | 25.929 |
| 5/30/2010 18:07:01 | 24.929 | 7/31/2010 23:54:00 | 23.0 | 5/31/2010 16:16:01 | 25.929 |
| 5/30/2010 18:27:01 | 24.929 | 8/1/2010 00:29:00  | 23.0 | 5/31/2010 16:36:01 | 25.929 |
| 5/30/2010 18:47:01 | 24.992 | 8/1/2010 01:04:00  | 23.0 | 5/31/2010 16:56:01 | 25.929 |
| 5/30/2010 19:07:01 | 24.992 | 8/1/2010 01:39:00  | 23.0 | 5/31/2010 17:16:01 | 25.929 |
| 5/30/2010 19:27:01 | 24.992 | 8/1/2010 02:14:00  | 23.0 | 5/31/2010 17:36:01 | 25.929 |

|                    |                          |                         |        |
|--------------------|--------------------------|-------------------------|--------|
| 5/30/2010 19:47:01 | 25.054 8/1/2010 02:49:00 | 23.0 5/31/2010 17:56:01 | 25.929 |
| 5/30/2010 20:07:01 | 25.054 8/1/2010 03:24:00 | 23.0 5/31/2010 18:16:01 | 25.929 |
| 5/30/2010 20:27:01 | 25.054 8/1/2010 03:59:00 | 23.0 5/31/2010 18:36:01 | 25.929 |
| 5/30/2010 20:47:01 | 25.054 8/1/2010 04:34:00 | 23.0 5/31/2010 18:56:01 | 25.992 |
| 5/30/2010 21:07:01 | 25.054 8/1/2010 05:09:00 | 23.0 5/31/2010 19:16:01 | 25.992 |
| 5/30/2010 21:27:01 | 25.054 8/1/2010 05:44:00 | 23.0 5/31/2010 19:36:01 | 25.992 |
| 5/30/2010 21:47:01 | 25.054 8/1/2010 06:19:00 | 23.0 5/31/2010 19:56:01 | 25.992 |
| 5/30/2010 22:07:01 | 25.054 8/1/2010 06:54:00 | 23.0 5/31/2010 20:16:01 | 25.992 |
| 5/30/2010 22:27:01 | 25.054 8/1/2010 07:29:00 | 23.0 5/31/2010 20:36:01 | 25.992 |
| 5/30/2010 22:47:01 | 25.054 8/1/2010 08:04:00 | 23.5 5/31/2010 20:56:01 | 25.992 |
| 5/30/2010 23:07:01 | 25.054 8/1/2010 08:39:00 | 23.5 5/31/2010 21:16:01 | 26.054 |
| 5/30/2010 23:27:01 | 25.054 8/1/2010 09:14:00 | 23.5 5/31/2010 21:36:01 | 26.054 |
| 5/30/2010 23:47:01 | 24.992 8/1/2010 09:49:00 | 23.0 5/31/2010 21:56:01 | 26.054 |
| 5/31/2010 00:07:01 | 24.992 8/1/2010 10:24:00 | 23.5 5/31/2010 22:16:01 | 26.054 |
| 5/31/2010 00:27:01 | 24.992 8/1/2010 10:59:00 | 23.5 5/31/2010 22:36:01 | 26.054 |
| 5/31/2010 00:47:01 | 24.992 8/1/2010 11:34:00 | 23.5 5/31/2010 22:56:01 | 26.054 |
| 5/31/2010 01:07:01 | 24.992 8/1/2010 12:09:00 | 23.5 5/31/2010 23:16:01 | 26.054 |
| 5/31/2010 01:27:01 | 24.929 8/1/2010 12:44:00 | 23.5 5/31/2010 23:36:01 | 26.054 |
| 5/31/2010 01:47:01 | 24.929 8/1/2010 13:19:00 | 23.5 5/31/2010 23:56:01 | 26.117 |
| 5/31/2010 02:07:01 | 24.929 8/1/2010 13:54:00 | 23.5 6/1/2010 00:16:01  | 26.117 |
| 5/31/2010 02:27:01 | 24.929 8/1/2010 14:29:00 | 23.5 6/1/2010 00:36:01  | 26.117 |
| 5/31/2010 02:47:01 | 24.867 8/1/2010 15:04:00 | 23.5 6/1/2010 00:56:01  | 26.117 |
| 5/31/2010 03:07:01 | 24.867 8/1/2010 15:39:00 | 23.5 6/1/2010 01:16:01  | 26.117 |
| 5/31/2010 03:27:01 | 24.867 8/1/2010 16:14:00 | 23.5 6/1/2010 01:36:01  | 26.117 |
| 5/31/2010 03:47:01 | 24.804 8/1/2010 16:49:00 | 23.5 6/1/2010 01:56:01  | 26.117 |
| 5/31/2010 04:07:01 | 24.804 8/1/2010 17:24:00 | 23.5 6/1/2010 02:16:01  | 26.117 |
| 5/31/2010 04:27:01 | 24.804 8/1/2010 17:59:00 | 23.5 6/1/2010 02:36:01  | 26.117 |
| 5/31/2010 04:47:01 | 24.742 8/1/2010 18:34:00 | 23.5 6/1/2010 02:56:01  | 26.117 |
| 5/31/2010 05:07:01 | 24.742 8/1/2010 19:09:00 | 23.5 6/1/2010 03:16:01  | 26.117 |
| 5/31/2010 05:27:01 | 24.742 8/1/2010 19:44:00 | 23.5 6/1/2010 03:36:01  | 26.117 |
| 5/31/2010 05:47:01 | 24.679 8/1/2010 20:19:00 | 23.5 6/1/2010 03:56:01  | 26.117 |
| 5/31/2010 06:07:01 | 24.679 8/1/2010 20:54:00 | 23.5 6/1/2010 04:16:01  | 26.117 |
| 5/31/2010 06:27:01 | 24.679 8/1/2010 21:29:00 | 23.5 6/1/2010 04:36:01  | 26.117 |
| 5/31/2010 06:47:01 | 24.617 8/1/2010 22:04:00 | 23.5 6/1/2010 04:56:01  | 26.117 |
| 5/31/2010 07:07:01 | 24.617 8/1/2010 22:39:00 | 23.5 6/1/2010 05:16:01  | 26.117 |
| 5/31/2010 07:27:01 | 24.617 8/1/2010 23:14:00 | 23.5 6/1/2010 05:36:01  | 26.054 |
| 5/31/2010 07:47:01 | 24.554 8/1/2010 23:49:00 | 23.5 6/1/2010 05:56:01  | 26.054 |
| 5/31/2010 08:07:01 | 24.554 8/2/2010 00:24:00 | 23.5 6/1/2010 06:16:01  | 26.054 |
| 5/31/2010 08:27:01 | 24.554 8/2/2010 00:59:00 | 23.5 6/1/2010 06:36:01  | 26.054 |
| 5/31/2010 08:47:01 | 24.492 8/2/2010 01:34:00 | 23.5 6/1/2010 06:56:01  | 26.054 |
| 5/31/2010 09:07:01 | 24.492 8/2/2010 02:09:00 | 23.5 6/1/2010 07:16:01  | 26.054 |
| 5/31/2010 09:27:01 | 24.429 8/2/2010 02:44:00 | 23.5 6/1/2010 07:36:01  | 25.992 |
| 5/31/2010 09:47:01 | 24.429 8/2/2010 03:19:00 | 23.5 6/1/2010 07:56:01  | 25.992 |
| 5/31/2010 10:07:01 | 24.429 8/2/2010 03:54:00 | 23.5 6/1/2010 08:16:01  | 25.992 |
| 5/31/2010 10:27:01 | 24.367 8/2/2010 04:29:00 | 23.5 6/1/2010 08:36:01  | 25.992 |
| 5/31/2010 10:47:01 | 24.367 8/2/2010 05:04:00 | 23.5 6/1/2010 08:56:01  | 25.992 |
| 5/31/2010 11:07:01 | 24.367 8/2/2010 05:39:00 | 24.0 6/1/2010 09:16:01  | 25.992 |
| 5/31/2010 11:27:01 | 24.367 8/2/2010 06:14:00 | 24.0 6/1/2010 09:36:01  | 25.992 |
| 5/31/2010 11:47:01 | 24.304 8/2/2010 06:49:00 | 23.5 6/1/2010 09:56:01  | 25.929 |
| 5/31/2010 12:07:01 | 24.304 8/2/2010 07:24:00 | 23.5 6/1/2010 10:16:01  | 25.929 |

|                    |                          |                        |        |
|--------------------|--------------------------|------------------------|--------|
| 5/31/2010 12:27:01 | 24.304 8/2/2010 07:59:00 | 23.5 6/1/2010 10:36:01 | 25.929 |
| 5/31/2010 12:47:01 | 24.304 8/2/2010 08:34:00 | 23.5 6/1/2010 10:56:01 | 25.929 |
| 5/31/2010 13:07:01 | 24.304 8/2/2010 09:09:00 | 23.5 6/1/2010 11:16:01 | 25.867 |
| 5/31/2010 13:27:01 | 24.304 8/2/2010 09:44:00 | 23.5 6/1/2010 11:36:01 | 25.867 |
| 5/31/2010 13:47:01 | 24.367 8/2/2010 10:19:00 | 23.5 6/1/2010 11:56:01 | 25.867 |
| 5/31/2010 14:07:01 | 24.367 8/2/2010 10:54:00 | 23.5 6/1/2010 12:16:01 | 25.867 |
| 5/31/2010 14:27:01 | 24.367 8/2/2010 11:29:00 | 23.5 6/1/2010 12:36:01 | 25.867 |
| 5/31/2010 14:47:01 | 24.429 8/2/2010 12:04:00 | 23.5 6/1/2010 12:56:01 | 25.867 |
| 5/31/2010 15:07:01 | 24.429 8/2/2010 12:39:00 | 23.5 6/1/2010 13:16:01 | 25.804 |
| 5/31/2010 15:27:01 | 24.492 8/2/2010 13:14:00 | 24.0 6/1/2010 13:36:01 | 25.804 |
| 5/31/2010 15:47:01 | 24.492 8/2/2010 13:49:00 | 24.0 6/1/2010 13:56:01 | 25.804 |
| 5/31/2010 16:07:01 | 24.554 8/2/2010 14:24:00 | 24.0 6/1/2010 14:16:01 | 25.804 |
| 5/31/2010 16:27:01 | 24.554 8/2/2010 14:59:00 | 24.0 6/1/2010 14:36:01 | 25.804 |
| 5/31/2010 16:47:01 | 24.617 8/2/2010 15:34:00 | 24.0 6/1/2010 14:56:01 | 25.804 |
| 5/31/2010 17:07:01 | 24.617 8/2/2010 16:09:00 | 24.0 6/1/2010 15:16:01 | 25.804 |
| 5/31/2010 17:27:01 | 24.679 8/2/2010 16:44:00 | 24.0 6/1/2010 15:36:01 | 25.804 |
| 5/31/2010 17:47:01 | 24.742 8/2/2010 17:19:00 | 23.5 6/1/2010 15:56:01 | 25.804 |
| 5/31/2010 18:07:01 | 24.742 8/2/2010 17:54:00 | 23.5 6/1/2010 16:16:01 | 25.804 |
| 5/31/2010 18:27:01 | 24.742 8/2/2010 18:29:00 | 23.5 6/1/2010 16:36:01 | 25.804 |
| 5/31/2010 18:47:01 | 24.804 8/2/2010 19:04:00 | 23.5 6/1/2010 16:56:01 | 25.804 |
| 5/31/2010 19:07:01 | 24.804 8/2/2010 19:39:00 | 23.5 6/1/2010 17:16:01 | 25.804 |
| 5/31/2010 19:27:01 | 24.804 8/2/2010 20:14:00 | 23.5 6/1/2010 17:36:01 | 25.804 |
| 5/31/2010 19:47:01 | 24.804 8/2/2010 20:49:00 | 23.5 6/1/2010 17:56:01 | 25.867 |
| 5/31/2010 20:07:01 | 24.804 8/2/2010 21:24:00 | 23.5 6/1/2010 18:16:01 | 25.867 |
| 5/31/2010 20:27:01 | 24.867 8/2/2010 21:59:00 | 23.5 6/1/2010 18:36:01 | 25.867 |
| 5/31/2010 20:47:01 | 24.867 8/2/2010 22:34:00 | 23.5 6/1/2010 18:56:01 | 25.867 |
| 5/31/2010 21:07:01 | 24.867 8/2/2010 23:09:00 | 23.5 6/1/2010 19:16:01 | 25.929 |
| 5/31/2010 21:27:01 | 24.867 8/2/2010 23:44:00 | 23.5 6/1/2010 19:36:01 | 25.929 |
| 5/31/2010 21:47:01 | 24.867 8/3/2010 00:19:00 | 23.5 6/1/2010 19:56:01 | 25.929 |
| 5/31/2010 22:07:01 | 24.867 8/3/2010 00:54:00 | 23.5 6/1/2010 20:16:01 | 25.929 |
| 5/31/2010 22:27:01 | 24.867 8/3/2010 01:29:00 | 23.5 6/1/2010 20:36:01 | 25.929 |
| 5/31/2010 22:47:01 | 24.867 8/3/2010 02:04:00 | 23.5 6/1/2010 20:56:01 | 25.992 |
| 5/31/2010 23:07:01 | 24.867 8/3/2010 02:39:00 | 23.5 6/1/2010 21:16:01 | 25.992 |
| 5/31/2010 23:27:01 | 24.804 8/3/2010 03:14:00 | 23.5 6/1/2010 21:36:01 | 25.992 |
| 5/31/2010 23:47:01 | 24.804 8/3/2010 03:49:00 | 23.5 6/1/2010 21:56:01 | 25.992 |
| 6/1/2010 00:07:01  | 24.804 8/3/2010 04:24:00 | 23.5 6/1/2010 22:16:01 | 25.992 |
| 6/1/2010 00:27:01  | 24.804 8/3/2010 04:59:00 | 23.5 6/1/2010 22:36:01 | 26.054 |
| 6/1/2010 00:47:01  | 24.804 8/3/2010 05:34:00 | 23.5 6/1/2010 22:56:01 | 26.054 |
| 6/1/2010 01:07:01  | 24.804 8/3/2010 06:09:00 | 23.5 6/1/2010 23:16:01 | 26.054 |
| 6/1/2010 01:27:01  | 24.804 8/3/2010 06:44:00 | 23.5 6/1/2010 23:36:01 | 26.054 |
| 6/1/2010 01:47:01  | 24.742 8/3/2010 07:19:00 | 23.0 6/1/2010 23:56:01 | 26.054 |
| 6/1/2010 02:07:01  | 24.742 8/3/2010 07:54:00 | 23.0 6/2/2010 00:16:01 | 26.117 |
| 6/1/2010 02:27:01  | 24.742 8/3/2010 08:29:00 | 23.0 6/2/2010 00:36:01 | 26.117 |
| 6/1/2010 02:47:01  | 24.742 8/3/2010 09:04:00 | 23.0 6/2/2010 00:56:01 | 26.117 |
| 6/1/2010 03:07:01  | 24.679 8/3/2010 09:39:00 | 23.0 6/2/2010 01:16:01 | 26.117 |
| 6/1/2010 03:27:01  | 24.679 8/3/2010 10:14:00 | 23.0 6/2/2010 01:36:01 | 26.117 |
| 6/1/2010 03:47:01  | 24.679 8/3/2010 10:49:00 | 23.0 6/2/2010 01:56:01 | 26.117 |
| 6/1/2010 04:07:01  | 24.679 8/3/2010 11:24:00 | 23.0 6/2/2010 02:16:01 | 26.117 |
| 6/1/2010 04:27:01  | 24.617 8/3/2010 11:59:00 | 23.0 6/2/2010 02:36:01 | 26.117 |
| 6/1/2010 04:47:01  | 24.617 8/3/2010 12:34:00 | 23.0 6/2/2010 02:56:01 | 26.117 |

|                   |        |                   |      |                   |        |
|-------------------|--------|-------------------|------|-------------------|--------|
| 6/1/2010 05:07:01 | 24.617 | 8/3/2010 13:09:00 | 23.0 | 6/2/2010 03:16:01 | 26.117 |
| 6/1/2010 05:27:01 | 24.554 | 8/3/2010 13:44:00 | 23.0 | 6/2/2010 03:36:01 | 26.117 |
| 6/1/2010 05:47:01 | 24.554 | 8/3/2010 14:19:00 | 23.0 | 6/2/2010 03:56:01 | 26.117 |
| 6/1/2010 06:07:01 | 24.554 | 8/3/2010 14:54:00 | 23.0 | 6/2/2010 04:16:01 | 26.117 |
| 6/1/2010 06:27:01 | 24.492 | 8/3/2010 15:29:00 | 23.0 | 6/2/2010 04:36:01 | 26.117 |
| 6/1/2010 06:47:01 | 24.492 | 8/3/2010 16:04:00 | 23.0 | 6/2/2010 04:56:01 | 26.054 |
| 6/1/2010 07:07:01 | 24.492 | 8/3/2010 16:39:00 | 23.0 | 6/2/2010 05:16:01 | 26.054 |
| 6/1/2010 07:27:01 | 24.429 | 8/3/2010 17:14:00 | 23.0 | 6/2/2010 05:36:01 | 26.054 |
| 6/1/2010 07:47:01 | 24.429 | 8/3/2010 17:49:00 | 23.5 | 6/2/2010 05:56:01 | 26.054 |
| 6/1/2010 08:07:01 | 24.429 | 8/3/2010 18:24:00 | 23.5 | 6/2/2010 06:16:01 | 26.054 |
| 6/1/2010 08:27:01 | 24.367 | 8/3/2010 18:59:00 | 23.5 | 6/2/2010 06:36:01 | 26.054 |
| 6/1/2010 08:47:01 | 24.367 | 8/3/2010 19:34:00 | 23.5 | 6/2/2010 06:56:01 | 26.054 |
| 6/1/2010 09:07:01 | 24.367 | 8/3/2010 20:09:00 | 23.5 | 6/2/2010 07:16:01 | 26.054 |
| 6/1/2010 09:27:01 | 24.304 | 8/3/2010 20:44:00 | 23.5 | 6/2/2010 07:36:01 | 26.054 |
| 6/1/2010 09:47:01 | 24.304 | 8/3/2010 21:19:00 | 23.5 | 6/2/2010 07:56:01 | 26.054 |
| 6/1/2010 10:07:01 | 24.304 | 8/3/2010 21:54:00 | 23.5 | 6/2/2010 08:16:01 | 25.992 |
| 6/1/2010 10:27:01 | 24.304 | 8/3/2010 22:29:00 | 23.5 | 6/2/2010 08:36:01 | 25.992 |
| 6/1/2010 10:47:01 | 24.242 | 8/3/2010 23:04:00 | 23.5 | 6/2/2010 08:56:01 | 25.992 |
| 6/1/2010 11:07:01 | 24.242 | 8/3/2010 23:39:00 | 23.5 | 6/2/2010 09:16:01 | 25.992 |
| 6/1/2010 11:27:01 | 24.242 | 8/4/2010 00:14:00 | 23.5 | 6/2/2010 09:36:01 | 25.992 |
| 6/1/2010 11:47:01 | 24.242 | 8/4/2010 00:49:00 | 23.5 | 6/2/2010 09:56:01 | 25.929 |
| 6/1/2010 12:07:01 | 24.242 | 8/4/2010 01:24:00 | 23.5 | 6/2/2010 10:16:01 | 25.929 |
| 6/1/2010 12:27:01 | 24.242 | 8/4/2010 01:59:00 | 23.5 | 6/2/2010 10:36:01 | 25.929 |
| 6/1/2010 12:47:01 | 24.242 | 8/4/2010 02:34:00 | 23.5 | 6/2/2010 10:56:01 | 25.929 |
| 6/1/2010 13:07:01 | 24.242 | 8/4/2010 03:09:00 | 23.5 | 6/2/2010 11:16:01 | 25.929 |
| 6/1/2010 13:27:01 | 24.242 | 8/4/2010 03:44:00 | 23.5 | 6/2/2010 11:36:01 | 25.867 |
| 6/1/2010 13:47:01 | 24.242 | 8/4/2010 04:19:00 | 23.0 | 6/2/2010 11:56:01 | 25.867 |
| 6/1/2010 14:07:01 | 24.304 | 8/4/2010 04:54:00 | 23.0 | 6/2/2010 12:16:01 | 25.867 |
| 6/1/2010 14:27:01 | 24.304 | 8/4/2010 05:29:00 | 23.0 | 6/2/2010 12:36:01 | 25.867 |
| 6/1/2010 14:47:01 | 24.304 | 8/4/2010 06:04:00 | 23.0 | 6/2/2010 12:56:01 | 25.867 |
| 6/1/2010 15:07:01 | 24.367 | 8/4/2010 06:39:00 | 23.0 | 6/2/2010 13:16:01 | 25.867 |
| 6/1/2010 15:27:01 | 24.429 | 8/4/2010 07:14:00 | 23.0 | 6/2/2010 13:36:01 | 25.867 |
| 6/1/2010 15:47:01 | 24.429 | 8/4/2010 07:49:00 | 23.0 | 6/2/2010 13:56:01 | 25.804 |
| 6/1/2010 16:07:01 | 24.492 | 8/4/2010 08:24:00 | 23.0 | 6/2/2010 14:16:01 | 25.804 |
| 6/1/2010 16:27:01 | 24.554 | 8/4/2010 08:59:00 | 23.0 | 6/2/2010 14:36:01 | 25.804 |
| 6/1/2010 16:47:01 | 24.554 | 8/4/2010 09:34:00 | 23.0 | 6/2/2010 14:56:01 | 25.804 |
| 6/1/2010 17:07:01 | 24.617 | 8/4/2010 10:09:00 | 23.0 | 6/2/2010 15:16:01 | 25.804 |
| 6/1/2010 17:27:01 | 24.617 | 8/4/2010 10:44:00 | 23.0 | 6/2/2010 15:36:01 | 25.804 |
| 6/1/2010 17:47:01 | 24.679 | 8/4/2010 11:19:00 | 23.0 | 6/2/2010 15:56:01 | 25.804 |
| 6/1/2010 18:07:01 | 24.742 | 8/4/2010 11:54:00 | 23.0 | 6/2/2010 16:16:01 | 25.804 |
| 6/1/2010 18:27:01 | 24.742 | 8/4/2010 12:29:00 | 23.0 | 6/2/2010 16:36:01 | 25.804 |
| 6/1/2010 18:47:01 | 24.742 | 8/4/2010 13:04:00 | 23.0 | 6/2/2010 16:56:01 | 25.867 |
| 6/1/2010 19:07:01 | 24.804 | 8/4/2010 13:39:00 | 23.0 | 6/2/2010 17:16:01 | 25.867 |
| 6/1/2010 19:27:01 | 24.804 | 8/4/2010 14:14:00 | 23.0 | 6/2/2010 17:36:01 | 25.867 |
| 6/1/2010 19:47:01 | 24.804 | 8/4/2010 14:49:00 | 23.0 | 6/2/2010 17:56:01 | 25.867 |
| 6/1/2010 20:07:01 | 24.867 | 8/4/2010 15:24:00 | 23.0 | 6/2/2010 18:16:01 | 25.867 |
| 6/1/2010 20:27:01 | 24.867 | 8/4/2010 15:59:00 | 23.0 | 6/2/2010 18:36:01 | 25.867 |
| 6/1/2010 20:47:01 | 24.867 | 8/4/2010 16:34:00 | 23.0 | 6/2/2010 18:56:01 | 25.867 |
| 6/1/2010 21:07:01 | 24.867 | 8/4/2010 17:09:00 | 23.0 | 6/2/2010 19:16:01 | 25.929 |
| 6/1/2010 21:27:01 | 24.867 | 8/4/2010 17:44:00 | 23.0 | 6/2/2010 19:36:01 | 25.929 |

|                   |        |                   |      |                   |        |
|-------------------|--------|-------------------|------|-------------------|--------|
| 6/1/2010 21:47:01 | 24.867 | 8/4/2010 18:19:00 | 23.0 | 6/2/2010 19:56:01 | 25.929 |
| 6/1/2010 22:07:01 | 24.867 | 8/4/2010 18:54:00 | 23.0 | 6/2/2010 20:16:01 | 25.929 |
| 6/1/2010 22:27:01 | 24.867 | 8/4/2010 19:29:00 | 23.5 | 6/2/2010 20:36:01 | 25.929 |
| 6/1/2010 22:47:01 | 24.867 | 8/4/2010 20:04:00 | 23.5 | 6/2/2010 20:56:01 | 25.992 |
| 6/1/2010 23:07:01 | 24.867 | 8/4/2010 20:39:00 | 23.5 | 6/2/2010 21:16:01 | 25.992 |
| 6/1/2010 23:27:01 | 24.867 | 8/4/2010 21:14:00 | 23.5 | 6/2/2010 21:36:01 | 25.992 |
| 6/1/2010 23:47:01 | 24.867 | 8/4/2010 21:49:00 | 23.5 | 6/2/2010 21:56:01 | 25.992 |
| 6/2/2010 00:07:01 | 24.867 | 8/4/2010 22:24:00 | 23.5 | 6/2/2010 22:16:01 | 25.992 |
| 6/2/2010 00:27:01 | 24.804 | 8/4/2010 22:59:00 | 23.5 | 6/2/2010 22:36:01 | 26.054 |
| 6/2/2010 00:47:01 | 24.804 | 8/4/2010 23:34:00 | 23.5 | 6/2/2010 22:56:01 | 26.054 |
| 6/2/2010 01:07:01 | 24.804 | 8/5/2010 00:09:00 | 23.5 | 6/2/2010 23:16:01 | 26.054 |
| 6/2/2010 01:27:01 | 24.804 | 8/5/2010 00:44:00 | 23.5 | 6/2/2010 23:36:01 | 26.054 |
| 6/2/2010 01:47:01 | 24.742 | 8/5/2010 01:19:00 | 23.0 | 6/2/2010 23:56:01 | 26.054 |
| 6/2/2010 02:07:01 | 24.742 | 8/5/2010 01:54:00 | 23.0 | 6/3/2010 00:16:01 | 26.054 |
| 6/2/2010 02:27:01 | 24.742 | 8/5/2010 02:29:00 | 23.0 | 6/3/2010 00:36:01 | 26.054 |
| 6/2/2010 02:47:01 | 24.742 | 8/5/2010 03:04:00 | 23.0 | 6/3/2010 00:56:01 | 26.054 |
| 6/2/2010 03:07:01 | 24.679 | 8/5/2010 03:39:00 | 23.0 | 6/3/2010 01:16:01 | 26.054 |
| 6/2/2010 03:27:01 | 24.679 | 8/5/2010 04:14:00 | 23.0 | 6/3/2010 01:36:01 | 26.117 |
| 6/2/2010 03:47:01 | 24.679 | 8/5/2010 04:49:00 | 23.0 | 6/3/2010 01:56:01 | 26.117 |
| 6/2/2010 04:07:01 | 24.617 | 8/5/2010 05:24:00 | 23.0 | 6/3/2010 02:16:01 | 26.117 |
| 6/2/2010 04:27:01 | 24.617 | 8/5/2010 05:59:00 | 23.0 | 6/3/2010 02:36:01 | 26.117 |
| 6/2/2010 04:47:01 | 24.617 | 8/5/2010 06:34:00 | 23.0 | 6/3/2010 02:56:01 | 26.117 |
| 6/2/2010 05:07:01 | 24.554 | 8/5/2010 07:09:00 | 23.0 | 6/3/2010 03:16:01 | 26.117 |
| 6/2/2010 05:27:01 | 24.554 | 8/5/2010 07:44:00 | 23.0 | 6/3/2010 03:36:01 | 26.117 |
| 6/2/2010 05:47:01 | 24.554 | 8/5/2010 08:19:00 | 23.0 | 6/3/2010 03:56:01 | 26.117 |
| 6/2/2010 06:07:01 | 24.492 | 8/5/2010 08:54:00 | 23.0 | 6/3/2010 04:16:01 | 26.117 |
| 6/2/2010 06:27:01 | 24.492 | 8/5/2010 09:29:00 | 23.0 | 6/3/2010 04:36:01 | 26.117 |
| 6/2/2010 06:47:01 | 24.492 | 8/5/2010 10:04:00 | 23.0 | 6/3/2010 04:56:01 | 26.117 |
| 6/2/2010 07:07:01 | 24.429 | 8/5/2010 10:39:00 | 23.0 | 6/3/2010 05:16:01 | 26.054 |
| 6/2/2010 07:27:01 | 24.429 | 8/5/2010 11:14:00 | 23.0 | 6/3/2010 05:36:01 | 26.054 |
| 6/2/2010 07:47:01 | 24.429 | 8/5/2010 11:49:00 | 23.0 | 6/3/2010 05:56:01 | 26.054 |
| 6/2/2010 08:07:01 | 24.429 | 8/5/2010 12:24:00 | 23.0 | 6/3/2010 06:16:01 | 26.054 |
| 6/2/2010 08:27:01 | 24.367 | 8/5/2010 12:59:00 | 23.0 | 6/3/2010 06:36:01 | 26.054 |
| 6/2/2010 08:47:01 | 24.367 | 8/5/2010 13:34:00 | 23.0 | 6/3/2010 06:56:01 | 26.054 |
| 6/2/2010 09:07:01 | 24.304 | 8/5/2010 14:09:00 | 23.0 | 6/3/2010 07:16:01 | 26.054 |
| 6/2/2010 09:27:01 | 24.304 | 8/5/2010 14:44:00 | 23.0 | 6/3/2010 07:36:01 | 26.054 |
| 6/2/2010 09:47:01 | 24.304 | 8/5/2010 15:19:00 | 23.0 | 6/3/2010 07:56:01 | 26.054 |
| 6/2/2010 10:07:01 | 24.242 | 8/5/2010 15:54:00 | 23.0 | 6/3/2010 08:16:01 | 26.054 |
| 6/2/2010 10:27:01 | 24.242 | 8/5/2010 16:29:00 | 23.0 | 6/3/2010 08:36:01 | 25.992 |
| 6/2/2010 10:47:01 | 24.242 | 8/5/2010 17:04:00 | 23.0 | 6/3/2010 08:56:01 | 25.992 |
| 6/2/2010 11:07:01 | 24.242 | 8/5/2010 17:39:00 | 23.0 | 6/3/2010 09:16:01 | 25.992 |
| 6/2/2010 11:27:01 | 24.242 | 8/5/2010 18:14:00 | 23.0 | 6/3/2010 09:36:01 | 25.992 |
| 6/2/2010 11:47:01 | 24.242 | 8/5/2010 18:49:00 | 23.0 | 6/3/2010 09:56:01 | 25.992 |
| 6/2/2010 12:07:01 | 24.242 | 8/5/2010 19:24:00 | 23.5 | 6/3/2010 10:16:01 | 25.992 |
| 6/2/2010 12:27:01 | 24.179 | 8/5/2010 19:59:00 | 23.5 | 6/3/2010 10:36:01 | 25.992 |
| 6/2/2010 12:47:01 | 24.242 | 8/5/2010 20:34:00 | 23.5 | 6/3/2010 10:56:01 | 25.929 |
| 6/2/2010 13:07:01 | 24.242 | 8/5/2010 21:09:00 | 23.5 | 6/3/2010 11:16:01 | 25.929 |
| 6/2/2010 13:27:01 | 24.242 | 8/5/2010 21:44:00 | 23.5 | 6/3/2010 11:36:01 | 25.929 |
| 6/2/2010 13:47:01 | 24.242 | 8/5/2010 22:19:00 | 23.5 | 6/3/2010 11:56:01 | 25.929 |
| 6/2/2010 14:07:01 | 24.242 | 8/5/2010 22:54:00 | 23.5 | 6/3/2010 12:16:01 | 25.929 |



|                   |        |                   |      |                   |        |
|-------------------|--------|-------------------|------|-------------------|--------|
| 6/2/2010 14:27:01 | 24.304 | 8/5/2010 23:29:00 | 23.5 | 6/3/2010 12:36:01 | 25.867 |
| 6/2/2010 14:47:01 | 24.304 | 8/6/2010 00:04:00 | 23.5 | 6/3/2010 12:56:01 | 25.867 |
| 6/2/2010 15:07:01 | 24.367 | 8/6/2010 00:39:00 | 23.0 | 6/3/2010 13:16:01 | 25.867 |
| 6/2/2010 15:27:01 | 24.367 | 8/6/2010 01:14:00 | 23.0 | 6/3/2010 13:36:01 | 25.867 |
| 6/2/2010 15:47:01 | 24.429 | 8/6/2010 01:49:00 | 23.0 | 6/3/2010 13:56:01 | 25.867 |
| 6/2/2010 16:07:01 | 24.429 | 8/6/2010 02:24:00 | 23.0 | 6/3/2010 14:16:01 | 25.867 |
| 6/2/2010 16:27:01 | 24.492 | 8/6/2010 02:59:00 | 23.0 | 6/3/2010 14:36:01 | 25.867 |
| 6/2/2010 16:47:01 | 24.492 | 8/6/2010 03:34:00 | 23.0 | 6/3/2010 14:56:01 | 25.867 |
| 6/2/2010 17:07:01 | 24.554 | 8/6/2010 04:09:00 | 23.0 | 6/3/2010 15:16:01 | 25.867 |
| 6/2/2010 17:27:01 | 24.554 | 8/6/2010 04:44:00 | 23.0 | 6/3/2010 15:36:01 | 25.867 |
| 6/2/2010 17:47:01 | 24.617 | 8/6/2010 05:19:00 | 23.0 | 6/3/2010 15:56:01 | 25.867 |
| 6/2/2010 18:07:01 | 24.617 | 8/6/2010 05:54:00 | 23.0 | 6/3/2010 16:16:01 | 25.867 |
| 6/2/2010 18:27:01 | 24.679 | 8/6/2010 06:29:00 | 23.0 | 6/3/2010 16:36:01 | 25.867 |
| 6/2/2010 18:47:01 | 24.679 | 8/6/2010 07:04:00 | 23.0 | 6/3/2010 16:56:01 | 25.867 |
| 6/2/2010 19:07:01 | 24.679 | 8/6/2010 07:39:00 | 23.0 | 6/3/2010 17:16:01 | 25.867 |
| 6/2/2010 19:27:01 | 24.742 | 8/6/2010 08:14:00 | 23.0 | 6/3/2010 17:36:01 | 25.867 |
| 6/2/2010 19:47:01 | 24.742 | 8/6/2010 08:49:00 | 23.0 | 6/3/2010 17:56:01 | 25.867 |
| 6/2/2010 20:07:01 | 24.742 | 8/6/2010 09:24:00 | 23.0 | 6/3/2010 18:16:01 | 25.867 |
| 6/2/2010 20:27:01 | 24.804 | 8/6/2010 09:59:00 | 23.0 | 6/3/2010 18:36:01 | 25.929 |
| 6/2/2010 20:47:01 | 24.804 | 8/6/2010 10:34:00 | 23.0 | 6/3/2010 18:56:01 | 25.929 |
| 6/2/2010 21:07:01 | 24.804 | 8/6/2010 11:09:00 | 23.0 | 6/3/2010 19:16:01 | 25.929 |
| 6/2/2010 21:27:01 | 24.804 | 8/6/2010 11:44:00 | 23.0 | 6/3/2010 19:36:01 | 25.929 |
| 6/2/2010 21:47:01 | 24.804 | 8/6/2010 12:19:00 | 23.0 | 6/3/2010 19:56:01 | 25.929 |
| 6/2/2010 22:07:01 | 24.804 | 8/6/2010 12:54:00 | 23.0 | 6/3/2010 20:16:01 | 25.929 |
| 6/2/2010 22:27:01 | 24.804 | 8/6/2010 13:29:00 | 23.0 | 6/3/2010 20:36:01 | 25.992 |
| 6/2/2010 22:47:01 | 24.804 | 8/6/2010 14:04:00 | 23.0 | 6/3/2010 20:56:01 | 25.992 |
| 6/2/2010 23:07:01 | 24.804 | 8/6/2010 14:39:00 | 23.0 | 6/3/2010 21:16:01 | 25.992 |
| 6/2/2010 23:27:01 | 24.804 | 8/6/2010 15:14:00 | 23.0 | 6/3/2010 21:36:01 | 25.992 |
| 6/2/2010 23:47:01 | 24.804 | 8/6/2010 15:49:00 | 23.0 | 6/3/2010 21:56:01 | 25.992 |
| 6/3/2010 00:07:01 | 24.804 | 8/6/2010 16:24:00 | 23.0 | 6/3/2010 22:16:01 | 26.054 |
| 6/3/2010 00:27:01 | 24.804 | 8/6/2010 16:59:00 | 23.0 | 6/3/2010 22:36:01 | 26.054 |
| 6/3/2010 00:47:01 | 24.804 | 8/6/2010 17:34:00 | 23.0 | 6/3/2010 22:56:01 | 26.054 |
| 6/3/2010 01:07:01 | 24.742 | 8/6/2010 18:09:00 | 23.0 | 6/3/2010 23:16:01 | 26.054 |
| 6/3/2010 01:27:01 | 24.742 | 8/6/2010 18:44:00 | 23.0 | 6/3/2010 23:36:01 | 26.054 |
| 6/3/2010 01:47:01 | 24.742 | 8/6/2010 19:19:00 | 23.0 | 6/3/2010 23:56:01 | 26.054 |
| 6/3/2010 02:07:01 | 24.742 | 8/6/2010 19:54:00 | 23.5 | 6/4/2010 00:16:01 | 26.054 |
| 6/3/2010 02:27:01 | 24.742 | 8/6/2010 20:29:00 | 23.5 | 6/4/2010 00:36:01 | 26.054 |
| 6/3/2010 02:47:01 | 24.742 | 8/6/2010 21:04:00 | 23.5 | 6/4/2010 00:56:01 | 26.054 |
| 6/3/2010 03:07:01 | 24.742 | 8/6/2010 21:39:00 | 23.5 | 6/4/2010 01:16:01 | 26.054 |
| 6/3/2010 03:27:01 | 24.742 | 8/6/2010 22:14:00 | 23.5 | 6/4/2010 01:36:01 | 26.054 |
| 6/3/2010 03:47:01 | 24.679 | 8/6/2010 22:49:00 | 23.5 | 6/4/2010 01:56:01 | 26.054 |
| 6/3/2010 04:07:01 | 24.679 | 8/6/2010 23:24:00 | 23.5 | 6/4/2010 02:16:01 | 26.054 |
| 6/3/2010 04:27:01 | 24.679 | 8/6/2010 23:59:00 | 23.5 | 6/4/2010 02:36:01 | 26.054 |
| 6/3/2010 04:47:01 | 24.679 | 8/7/2010 00:34:00 | 23.5 | 6/4/2010 02:56:01 | 26.054 |
| 6/3/2010 05:07:01 | 24.679 | 8/7/2010 01:09:00 | 23.5 | 6/4/2010 03:16:01 | 26.054 |
| 6/3/2010 05:27:01 | 24.617 | 8/7/2010 01:44:00 | 23.5 | 6/4/2010 03:36:01 | 26.054 |
| 6/3/2010 05:47:01 | 24.617 | 8/7/2010 02:19:00 | 23.5 | 6/4/2010 03:56:01 | 26.054 |
| 6/3/2010 06:07:01 | 24.617 | 8/7/2010 02:54:00 | 23.5 | 6/4/2010 04:16:01 | 26.054 |
| 6/3/2010 06:27:01 | 24.617 | 8/7/2010 03:29:00 | 23.5 | 6/4/2010 04:36:01 | 26.054 |
| 6/3/2010 06:47:01 | 24.554 | 8/7/2010 04:04:00 | 23.5 | 6/4/2010 04:56:01 | 26.054 |

|                   |        |                   |      |                   |        |
|-------------------|--------|-------------------|------|-------------------|--------|
| 6/3/2010 07:07:01 | 24.554 | 8/7/2010 04:39:00 | 23.5 | 6/4/2010 05:16:01 | 25.992 |
| 6/3/2010 07:27:01 | 24.554 | 8/7/2010 05:14:00 | 23.5 | 6/4/2010 05:36:01 | 25.992 |
| 6/3/2010 07:47:01 | 24.554 | 8/7/2010 05:49:00 | 23.0 | 6/4/2010 05:56:01 | 25.992 |
| 6/3/2010 08:07:01 | 24.492 | 8/7/2010 06:24:00 | 23.0 | 6/4/2010 06:16:01 | 25.992 |
| 6/3/2010 08:27:01 | 24.492 | 8/7/2010 06:59:00 | 23.0 | 6/4/2010 06:36:01 | 25.992 |
| 6/3/2010 08:47:01 | 24.492 | 8/7/2010 07:34:00 | 23.0 | 6/4/2010 06:56:01 | 25.992 |
| 6/3/2010 09:07:01 | 24.429 | 8/7/2010 08:09:00 | 23.0 | 6/4/2010 07:16:01 | 25.929 |
| 6/3/2010 09:27:01 | 24.429 | 8/7/2010 08:44:00 | 23.0 | 6/4/2010 07:36:01 | 25.929 |
| 6/3/2010 09:47:01 | 24.429 | 8/7/2010 09:19:00 | 23.0 | 6/4/2010 07:56:01 | 25.929 |
| 6/3/2010 10:07:01 | 24.429 | 8/7/2010 09:54:00 | 23.0 | 6/4/2010 08:16:01 | 25.929 |
| 6/3/2010 10:27:01 | 24.367 | 8/7/2010 10:29:00 | 23.0 | 6/4/2010 08:36:01 | 25.867 |
| 6/3/2010 10:47:01 | 24.367 | 8/7/2010 11:04:00 | 23.0 | 6/4/2010 08:56:01 | 25.867 |
| 6/3/2010 11:07:01 | 24.367 | 8/7/2010 11:39:00 | 23.0 | 6/4/2010 09:16:01 | 25.867 |
| 6/3/2010 11:27:01 | 24.367 | 8/7/2010 12:14:00 | 23.0 | 6/4/2010 09:36:01 | 25.804 |
| 6/3/2010 11:47:01 | 24.304 | 8/7/2010 12:49:00 | 23.0 | 6/4/2010 09:56:01 | 25.804 |
| 6/3/2010 12:07:01 | 24.304 | 8/7/2010 13:24:00 | 23.0 | 6/4/2010 10:16:01 | 25.804 |
| 6/3/2010 12:27:01 | 24.304 | 8/7/2010 13:59:00 | 23.0 | 6/4/2010 10:36:01 | 25.804 |
| 6/3/2010 12:47:01 | 24.304 | 8/7/2010 14:34:00 | 23.0 | 6/4/2010 10:56:01 | 25.742 |
| 6/3/2010 13:07:01 | 24.304 | 8/7/2010 15:09:00 | 23.5 | 6/4/2010 11:16:01 | 25.742 |
| 6/3/2010 13:27:01 | 24.367 | 8/7/2010 15:44:00 | 23.5 | 6/4/2010 11:36:01 | 25.742 |
| 6/3/2010 13:47:01 | 24.367 | 8/7/2010 16:19:00 | 23.5 | 6/4/2010 11:56:01 | 25.679 |
| 6/3/2010 14:07:01 | 24.367 | 8/7/2010 16:54:00 | 23.5 | 6/4/2010 12:16:01 | 25.679 |
| 6/3/2010 14:27:01 | 24.429 | 8/7/2010 17:29:00 | 23.5 | 6/4/2010 12:36:01 | 25.679 |
| 6/3/2010 14:47:01 | 24.429 | 8/7/2010 18:04:00 | 23.5 | 6/4/2010 12:56:01 | 25.679 |
| 6/3/2010 15:07:01 | 24.429 | 8/7/2010 18:39:00 | 23.5 | 6/4/2010 13:16:01 | 25.617 |
| 6/3/2010 15:27:01 | 24.492 | 8/7/2010 19:14:00 | 23.5 | 6/4/2010 13:36:01 | 25.617 |
| 6/3/2010 15:47:01 | 24.492 | 8/7/2010 19:49:00 | 23.5 | 6/4/2010 13:56:01 | 25.617 |
| 6/3/2010 16:07:01 | 24.554 | 8/7/2010 20:24:00 | 23.5 | 6/4/2010 14:16:01 | 25.617 |
| 6/3/2010 16:27:01 | 24.617 | 8/7/2010 20:59:00 | 23.5 | 6/4/2010 14:36:01 | 25.617 |
| 6/3/2010 16:47:01 | 24.617 | 8/7/2010 21:34:00 | 23.5 | 6/4/2010 14:56:01 | 25.554 |
| 6/3/2010 17:07:01 | 24.679 | 8/7/2010 22:09:00 | 23.5 | 6/4/2010 15:16:01 | 25.554 |
| 6/3/2010 17:27:01 | 24.679 | 8/7/2010 22:44:00 | 23.5 | 6/4/2010 15:36:01 | 25.554 |
| 6/3/2010 17:47:01 | 24.742 | 8/7/2010 23:19:00 | 23.5 | 6/4/2010 15:56:01 | 25.554 |
| 6/3/2010 18:07:01 | 24.742 | 8/7/2010 23:54:00 | 23.5 | 6/4/2010 16:16:01 | 25.554 |
| 6/3/2010 18:27:01 | 24.804 | 8/8/2010 00:29:00 | 23.5 | 6/4/2010 16:36:01 | 25.554 |
| 6/3/2010 18:47:01 | 24.804 | 8/8/2010 01:04:00 | 23.5 | 6/4/2010 16:56:01 | 25.554 |
| 6/3/2010 19:07:01 | 24.804 | 8/8/2010 01:39:00 | 23.5 | 6/4/2010 17:16:01 | 25.554 |
| 6/3/2010 19:27:01 | 24.804 | 8/8/2010 02:14:00 | 23.5 | 6/4/2010 17:36:01 | 25.554 |
| 6/3/2010 19:47:01 | 24.867 | 8/8/2010 02:49:00 | 23.5 | 6/4/2010 17:56:01 | 25.617 |
| 6/3/2010 20:07:01 | 24.867 | 8/8/2010 03:24:00 | 23.5 | 6/4/2010 18:16:01 | 25.617 |
| 6/3/2010 20:27:01 | 24.867 | 8/8/2010 03:59:00 | 23.5 | 6/4/2010 18:36:01 | 25.617 |
| 6/3/2010 20:47:01 | 24.867 | 8/8/2010 04:34:00 | 23.5 | 6/4/2010 18:56:01 | 25.617 |
| 6/3/2010 21:07:01 | 24.867 | 8/8/2010 05:09:00 | 23.5 | 6/4/2010 19:16:01 | 25.617 |
| 6/3/2010 21:27:01 | 24.867 | 8/8/2010 05:44:00 | 23.5 | 6/4/2010 19:36:01 | 25.679 |
| 6/3/2010 21:47:01 | 24.867 | 8/8/2010 06:19:00 | 23.5 | 6/4/2010 19:56:01 | 25.679 |
| 6/3/2010 22:07:01 | 24.867 | 8/8/2010 06:54:00 | 23.5 | 6/4/2010 20:16:01 | 25.679 |
| 6/3/2010 22:27:01 | 24.867 | 8/8/2010 07:29:00 | 23.5 | 6/4/2010 20:36:01 | 25.679 |
| 6/3/2010 22:47:01 | 24.867 | 8/8/2010 08:04:00 | 23.5 | 6/4/2010 20:56:01 | 25.679 |
| 6/3/2010 23:07:01 | 24.867 | 8/8/2010 08:39:00 | 23.5 | 6/4/2010 21:16:01 | 25.742 |
| 6/3/2010 23:27:01 | 24.804 | 8/8/2010 09:14:00 | 23.5 | 6/4/2010 21:36:01 | 25.742 |

|                   |        |                   |      |                   |        |
|-------------------|--------|-------------------|------|-------------------|--------|
| 6/3/2010 23:47:01 | 24.804 | 8/8/2010 09:49:00 | 23.5 | 6/4/2010 21:56:01 | 25.742 |
| 6/4/2010 00:07:01 | 24.804 | 8/8/2010 10:24:00 | 23.5 | 6/4/2010 22:16:01 | 25.742 |
| 6/4/2010 00:27:01 | 24.742 | 8/8/2010 10:59:00 | 23.5 | 6/4/2010 22:36:01 | 25.742 |
| 6/4/2010 00:47:01 | 24.742 | 8/8/2010 11:34:00 | 23.5 | 6/4/2010 22:56:01 | 25.742 |
| 6/4/2010 01:07:01 | 24.742 | 8/8/2010 12:09:00 | 23.5 | 6/4/2010 23:16:01 | 25.804 |
| 6/4/2010 01:27:01 | 24.742 | 8/8/2010 12:44:00 | 23.5 | 6/4/2010 23:36:01 | 25.804 |
| 6/4/2010 01:47:01 | 24.679 | 8/8/2010 13:19:00 | 23.5 | 6/4/2010 23:56:01 | 25.804 |
| 6/4/2010 02:07:01 | 24.679 | 8/8/2010 13:54:00 | 23.5 | 6/5/2010 00:16:01 | 25.804 |
| 6/4/2010 02:27:01 | 24.617 | 8/8/2010 14:29:00 | 23.5 | 6/5/2010 00:36:01 | 25.804 |
| 6/4/2010 02:47:01 | 24.617 | 8/8/2010 15:04:00 | 23.5 | 6/5/2010 00:56:01 | 25.804 |
| 6/4/2010 03:07:01 | 24.617 | 8/8/2010 15:39:00 | 23.5 | 6/5/2010 01:16:01 | 25.804 |
| 6/4/2010 03:27:01 | 24.554 | 8/8/2010 16:14:00 | 23.5 | 6/5/2010 01:36:01 | 25.804 |
| 6/4/2010 03:47:01 | 24.554 | 8/8/2010 16:49:00 | 23.5 | 6/5/2010 01:56:01 | 25.804 |
| 6/4/2010 04:07:01 | 24.492 | 8/8/2010 17:24:00 | 23.5 | 6/5/2010 02:16:01 | 25.804 |
| 6/4/2010 04:27:01 | 24.492 | 8/8/2010 17:59:00 | 23.5 | 6/5/2010 02:36:01 | 25.804 |
| 6/4/2010 04:47:01 | 24.429 | 8/8/2010 18:34:00 | 23.5 | 6/5/2010 02:56:01 | 25.804 |
| 6/4/2010 05:07:01 | 24.429 | 8/8/2010 19:09:00 | 23.5 | 6/5/2010 03:16:01 | 25.804 |
| 6/4/2010 05:27:01 | 24.367 | 8/8/2010 19:44:00 | 24.0 | 6/5/2010 03:36:01 | 25.804 |
| 6/4/2010 05:47:01 | 24.367 | 8/8/2010 20:19:00 | 24.0 | 6/5/2010 03:56:01 | 25.804 |
| 6/4/2010 06:07:01 | 24.304 | 8/8/2010 20:54:00 | 24.0 | 6/5/2010 04:16:01 | 25.804 |
| 6/4/2010 06:27:01 | 24.304 | 8/8/2010 21:29:00 | 24.0 | 6/5/2010 04:36:01 | 25.804 |
| 6/4/2010 06:47:01 | 24.242 | 8/8/2010 22:04:00 | 24.0 | 6/5/2010 04:56:01 | 25.804 |
| 6/4/2010 07:07:01 | 24.242 | 8/8/2010 22:39:00 | 24.0 | 6/5/2010 05:16:01 | 25.742 |
| 6/4/2010 07:27:01 | 24.179 | 8/8/2010 23:14:00 | 23.5 | 6/5/2010 05:36:01 | 25.742 |
| 6/4/2010 07:47:01 | 24.179 | 8/8/2010 23:49:00 | 23.5 | 6/5/2010 05:56:01 | 25.742 |
| 6/4/2010 08:07:01 | 24.117 | 8/9/2010 00:24:00 | 23.5 | 6/5/2010 06:16:01 | 25.742 |
| 6/4/2010 08:27:01 | 24.117 | 8/9/2010 00:59:00 | 23.5 | 6/5/2010 06:36:01 | 25.742 |
| 6/4/2010 08:47:01 | 24.054 | 8/9/2010 01:34:00 | 23.5 | 6/5/2010 06:56:01 | 25.742 |
| 6/4/2010 09:07:01 | 24.054 | 8/9/2010 02:09:00 | 23.5 | 6/5/2010 07:16:01 | 25.679 |
| 6/4/2010 09:27:01 | 23.992 | 8/9/2010 02:44:00 | 23.5 | 6/5/2010 07:36:01 | 25.679 |
| 6/4/2010 09:47:01 | 23.992 | 8/9/2010 03:19:00 | 23.5 | 6/5/2010 07:56:01 | 25.679 |
| 6/4/2010 10:07:01 | 23.992 | 8/9/2010 03:54:00 | 23.5 | 6/5/2010 08:16:01 | 25.679 |
| 6/4/2010 10:27:01 | 23.929 | 8/9/2010 04:29:00 | 23.5 | 6/5/2010 08:36:01 | 25.679 |
| 6/4/2010 10:47:01 | 23.929 | 8/9/2010 05:04:00 | 23.5 | 6/5/2010 08:56:01 | 25.679 |
| 6/4/2010 11:07:01 | 23.867 | 8/9/2010 05:39:00 | 23.5 | 6/5/2010 09:16:01 | 25.679 |
| 6/4/2010 11:27:01 | 23.867 | 8/9/2010 06:14:00 | 23.5 | 6/5/2010 09:36:01 | 25.617 |
| 6/4/2010 11:47:01 | 23.867 | 8/9/2010 06:49:00 | 23.5 | 6/5/2010 09:56:01 | 25.617 |
| 6/4/2010 12:07:01 | 23.867 | 8/9/2010 07:24:00 | 23.5 | 6/5/2010 10:16:01 | 25.617 |
| 6/4/2010 12:27:01 | 23.867 | 8/9/2010 07:59:00 | 23.5 | 6/5/2010 10:36:01 | 25.617 |
| 6/4/2010 12:47:01 | 23.867 | 8/9/2010 08:34:00 | 23.0 | 6/5/2010 10:56:01 | 25.617 |
| 6/4/2010 13:07:01 | 23.867 | 8/9/2010 09:09:00 | 23.0 | 6/5/2010 11:16:01 | 25.554 |
| 6/4/2010 13:27:01 | 23.867 | 8/9/2010 09:44:00 | 23.0 | 6/5/2010 11:36:01 | 25.554 |
| 6/4/2010 13:47:01 | 23.867 | 8/9/2010 10:19:00 | 23.0 | 6/5/2010 11:56:01 | 25.554 |
| 6/4/2010 14:07:01 | 23.867 | 8/9/2010 10:54:00 | 23.0 | 6/5/2010 12:16:01 | 25.554 |
| 6/4/2010 14:27:01 | 23.929 | 8/9/2010 11:29:00 | 23.0 | 6/5/2010 12:36:01 | 25.554 |
| 6/4/2010 14:47:01 | 23.929 | 8/9/2010 12:04:00 | 23.0 | 6/5/2010 12:56:01 | 25.554 |
| 6/4/2010 15:07:01 | 23.992 | 8/9/2010 12:39:00 | 23.0 | 6/5/2010 13:16:01 | 25.492 |
| 6/4/2010 15:27:01 | 23.992 | 8/9/2010 13:14:00 | 23.0 | 6/5/2010 13:36:01 | 25.492 |
| 6/4/2010 15:47:01 | 24.054 | 8/9/2010 13:49:00 | 23.0 | 6/5/2010 13:56:01 | 25.492 |
| 6/4/2010 16:07:01 | 24.054 | 8/9/2010 14:24:00 | 23.0 | 6/5/2010 14:16:01 | 25.492 |

|                   |        |                    |      |                   |        |
|-------------------|--------|--------------------|------|-------------------|--------|
| 6/4/2010 16:27:01 | 24.117 | 8/9/2010 14:59:00  | 23.0 | 6/5/2010 14:36:01 | 25.492 |
| 6/4/2010 16:47:01 | 24.179 | 8/9/2010 15:34:00  | 23.0 | 6/5/2010 14:56:01 | 25.492 |
| 6/4/2010 17:07:01 | 24.179 | 8/9/2010 16:09:00  | 23.5 | 6/5/2010 15:16:01 | 25.492 |
| 6/4/2010 17:27:01 | 24.242 | 8/9/2010 16:44:00  | 23.5 | 6/5/2010 15:36:01 | 25.492 |
| 6/4/2010 17:47:01 | 24.304 | 8/9/2010 17:19:00  | 23.5 | 6/5/2010 15:56:01 | 25.492 |
| 6/4/2010 18:07:01 | 24.304 | 8/9/2010 17:54:00  | 23.5 | 6/5/2010 16:16:01 | 25.492 |
| 6/4/2010 18:27:01 | 24.367 | 8/9/2010 18:29:00  | 23.5 | 6/5/2010 16:36:01 | 25.492 |
| 6/4/2010 18:47:01 | 24.429 | 8/9/2010 19:04:00  | 23.5 | 6/5/2010 16:56:01 | 25.492 |
| 6/4/2010 19:07:01 | 24.429 | 8/9/2010 19:39:00  | 23.5 | 6/5/2010 17:16:01 | 25.492 |
| 6/4/2010 19:27:01 | 24.429 | 8/9/2010 20:14:00  | 23.5 | 6/5/2010 17:36:01 | 25.492 |
| 6/4/2010 19:47:01 | 24.429 | 8/9/2010 20:49:00  | 23.5 | 6/5/2010 17:56:01 | 25.492 |
| 6/4/2010 20:07:01 | 24.492 | 8/9/2010 21:24:00  | 23.5 | 6/5/2010 18:16:01 | 25.492 |
| 6/4/2010 20:27:01 | 24.492 | 8/9/2010 21:59:00  | 23.5 | 6/5/2010 18:36:01 | 25.554 |
| 6/4/2010 20:47:01 | 24.492 | 8/9/2010 22:34:00  | 23.5 | 6/5/2010 18:56:01 | 25.554 |
| 6/4/2010 21:07:01 | 24.492 | 8/9/2010 23:09:00  | 23.5 | 6/5/2010 19:16:01 | 25.554 |
| 6/4/2010 21:27:01 | 24.492 | 8/9/2010 23:44:00  | 23.5 | 6/5/2010 19:36:01 | 25.554 |
| 6/4/2010 21:47:01 | 24.492 | 8/10/2010 00:19:00 | 23.5 | 6/5/2010 19:56:01 | 25.554 |
| 6/4/2010 22:07:01 | 24.492 | 8/10/2010 00:54:00 | 23.5 | 6/5/2010 20:16:01 | 25.554 |
| 6/4/2010 22:27:01 | 24.492 | 8/10/2010 01:29:00 | 23.5 | 6/5/2010 20:36:01 | 25.617 |
| 6/4/2010 22:47:01 | 24.492 | 8/10/2010 02:04:00 | 23.5 | 6/5/2010 20:56:01 | 25.617 |
| 6/4/2010 23:07:01 | 24.492 | 8/10/2010 02:39:00 | 23.5 | 6/5/2010 21:16:01 | 25.617 |
| 6/4/2010 23:27:01 | 24.492 | 8/10/2010 03:14:00 | 23.5 | 6/5/2010 21:36:01 | 25.617 |
| 6/4/2010 23:47:01 | 24.492 | 8/10/2010 03:49:00 | 23.5 | 6/5/2010 21:56:01 | 25.617 |
| 6/5/2010 00:07:01 | 24.429 | 8/10/2010 04:24:00 | 23.5 | 6/5/2010 22:16:01 | 25.679 |
| 6/5/2010 00:27:01 | 24.429 | 8/10/2010 04:59:00 | 23.5 | 6/5/2010 22:36:01 | 25.679 |
| 6/5/2010 00:47:01 | 24.429 | 8/10/2010 05:34:00 | 23.5 | 6/5/2010 22:56:01 | 25.679 |
| 6/5/2010 01:07:01 | 24.429 | 8/10/2010 06:09:00 | 23.5 | 6/5/2010 23:16:01 | 25.679 |
| 6/5/2010 01:27:01 | 24.429 | 8/10/2010 06:44:00 | 23.5 | 6/5/2010 23:36:01 | 25.679 |
| 6/5/2010 01:47:01 | 24.367 | 8/10/2010 07:19:00 | 23.5 | 6/5/2010 23:56:01 | 25.679 |
| 6/5/2010 02:07:01 | 24.367 | 8/10/2010 07:54:00 | 23.5 | 6/6/2010 00:16:01 | 25.742 |
| 6/5/2010 02:27:01 | 24.367 | 8/10/2010 08:29:00 | 23.5 | 6/6/2010 00:36:01 | 25.742 |
| 6/5/2010 02:47:01 | 24.304 | 8/10/2010 09:04:00 | 23.5 | 6/6/2010 00:56:01 | 25.742 |
| 6/5/2010 03:07:01 | 24.304 | 8/10/2010 09:39:00 | 23.5 | 6/6/2010 01:16:01 | 25.742 |
| 6/5/2010 03:27:01 | 24.304 | 8/10/2010 10:14:00 | 23.5 | 6/6/2010 01:36:01 | 25.742 |
| 6/5/2010 03:47:01 | 24.304 | 8/10/2010 10:49:00 | 23.5 | 6/6/2010 01:56:01 | 25.742 |
| 6/5/2010 04:07:01 | 24.242 | 8/10/2010 11:24:00 | 23.5 | 6/6/2010 02:16:01 | 25.742 |
| 6/5/2010 04:27:01 | 24.242 | 8/10/2010 11:59:00 | 23.5 | 6/6/2010 02:36:01 | 25.742 |
| 6/5/2010 04:47:01 | 24.242 | 8/10/2010 12:34:00 | 23.5 | 6/6/2010 02:56:01 | 25.742 |
| 6/5/2010 05:07:01 | 24.179 | 8/10/2010 13:09:00 | 23.5 | 6/6/2010 03:16:01 | 25.742 |
| 6/5/2010 05:27:01 | 24.179 | 8/10/2010 13:44:00 | 23.5 | 6/6/2010 03:36:01 | 25.742 |
| 6/5/2010 05:47:01 | 24.179 | 8/10/2010 14:19:00 | 23.5 | 6/6/2010 03:56:01 | 25.742 |
| 6/5/2010 06:07:01 | 24.117 | 8/10/2010 14:54:00 | 23.5 | 6/6/2010 04:16:01 | 25.742 |
| 6/5/2010 06:27:01 | 24.117 | 8/10/2010 15:29:00 | 23.5 | 6/6/2010 04:36:01 | 25.742 |
| 6/5/2010 06:47:01 | 24.117 | 8/10/2010 16:04:00 | 23.5 | 6/6/2010 04:56:01 | 25.742 |
| 6/5/2010 07:07:01 | 24.117 | 8/10/2010 16:39:00 | 24.0 | 6/6/2010 05:16:01 | 25.742 |
| 6/5/2010 07:27:01 | 24.054 | 8/10/2010 17:14:00 | 24.0 | 6/6/2010 05:36:01 | 25.742 |
| 6/5/2010 07:47:01 | 24.054 | 8/10/2010 17:49:00 | 24.0 | 6/6/2010 05:56:01 | 25.742 |
| 6/5/2010 08:07:01 | 24.054 | 8/10/2010 18:24:00 | 24.0 | 6/6/2010 06:16:01 | 25.742 |
| 6/5/2010 08:27:01 | 24.054 | 8/10/2010 18:59:00 | 24.0 | 6/6/2010 06:36:01 | 25.742 |
| 6/5/2010 08:47:01 | 23.992 | 8/10/2010 19:34:00 | 24.0 | 6/6/2010 06:56:01 | 25.679 |

|                   |        |                    |      |                   |        |
|-------------------|--------|--------------------|------|-------------------|--------|
| 6/5/2010 09:07:01 | 23.992 | 8/10/2010 20:09:00 | 24.0 | 6/6/2010 07:16:01 | 25.679 |
| 6/5/2010 09:27:01 | 23.992 | 8/10/2010 20:44:00 | 24.0 | 6/6/2010 07:36:01 | 25.679 |
| 6/5/2010 09:47:01 | 23.992 | 8/10/2010 21:19:00 | 24.0 | 6/6/2010 07:56:01 | 25.679 |
| 6/5/2010 10:07:01 | 23.929 | 8/10/2010 21:54:00 | 24.0 | 6/6/2010 08:16:01 | 25.679 |
| 6/5/2010 10:27:01 | 23.929 | 8/10/2010 22:29:00 | 24.0 | 6/6/2010 08:36:01 | 25.679 |
| 6/5/2010 10:47:01 | 23.929 | 8/10/2010 23:04:00 | 24.0 | 6/6/2010 08:56:01 | 25.679 |
| 6/5/2010 11:07:01 | 23.929 | 8/10/2010 23:39:00 | 24.0 | 6/6/2010 09:16:01 | 25.679 |
| 6/5/2010 11:27:01 | 23.929 | 8/11/2010 00:14:00 | 24.0 | 6/6/2010 09:36:01 | 25.679 |
| 6/5/2010 11:47:01 | 23.929 | 8/11/2010 00:49:00 | 24.0 | 6/6/2010 09:56:01 | 25.617 |
| 6/5/2010 12:07:01 | 23.929 | 8/11/2010 01:24:00 | 24.0 | 6/6/2010 10:16:01 | 25.617 |
| 6/5/2010 12:27:01 | 23.929 | 8/11/2010 01:59:00 | 24.0 | 6/6/2010 10:36:01 | 25.617 |
| 6/5/2010 12:47:01 | 23.929 | 8/11/2010 02:34:00 | 24.0 | 6/6/2010 10:56:01 | 25.617 |
| 6/5/2010 13:07:01 | 23.929 | 8/11/2010 03:09:00 | 24.0 | 6/6/2010 11:16:01 | 25.617 |
| 6/5/2010 13:27:01 | 23.929 | 8/11/2010 03:44:00 | 24.0 | 6/6/2010 11:36:01 | 25.617 |
| 6/5/2010 13:47:01 | 23.929 | 8/11/2010 04:19:00 | 24.0 | 6/6/2010 11:56:01 | 25.554 |
| 6/5/2010 14:07:01 | 23.992 | 8/11/2010 04:54:00 | 24.0 | 6/6/2010 12:16:01 | 25.554 |
| 6/5/2010 14:27:01 | 23.992 | 8/11/2010 05:29:00 | 24.0 | 6/6/2010 12:36:01 | 25.554 |
| 6/5/2010 14:47:01 | 23.992 | 8/11/2010 06:04:00 | 24.0 | 6/6/2010 12:56:01 | 25.554 |
| 6/5/2010 15:07:01 | 24.054 | 8/11/2010 06:39:00 | 23.5 | 6/6/2010 13:16:01 | 25.554 |
| 6/5/2010 15:27:01 | 24.054 | 8/11/2010 07:14:00 | 23.5 | 6/6/2010 13:36:01 | 25.554 |
| 6/5/2010 15:47:01 | 24.117 | 8/11/2010 07:49:00 | 23.5 | 6/6/2010 13:56:01 | 25.554 |
| 6/5/2010 16:07:01 | 24.117 | 8/11/2010 08:24:00 | 23.5 | 6/6/2010 14:16:01 | 25.554 |
| 6/5/2010 16:27:01 | 24.179 | 8/11/2010 08:59:00 | 23.5 | 6/6/2010 14:36:01 | 25.554 |
| 6/5/2010 16:47:01 | 24.179 | 8/11/2010 09:34:00 | 23.5 | 6/6/2010 14:56:01 | 25.554 |
| 6/5/2010 17:07:01 | 24.242 | 8/11/2010 10:09:00 | 23.5 | 6/6/2010 15:16:01 | 25.554 |
| 6/5/2010 17:27:01 | 24.304 | 8/11/2010 10:44:00 | 23.5 | 6/6/2010 15:36:01 | 25.554 |
| 6/5/2010 17:47:01 | 24.304 | 8/11/2010 11:19:00 | 23.5 | 6/6/2010 15:56:01 | 25.554 |
| 6/5/2010 18:07:01 | 24.367 | 8/11/2010 11:54:00 | 23.5 | 6/6/2010 16:16:01 | 25.554 |
| 6/5/2010 18:27:01 | 24.367 | 8/11/2010 12:29:00 | 23.5 | 6/6/2010 16:36:01 | 25.554 |
| 6/5/2010 18:47:01 | 24.429 | 8/11/2010 13:04:00 | 23.5 | 6/6/2010 16:56:01 | 25.554 |
| 6/5/2010 19:07:01 | 24.429 | 8/11/2010 13:39:00 | 23.5 | 6/6/2010 17:16:01 | 25.554 |
| 6/5/2010 19:27:01 | 24.429 | 8/11/2010 14:14:00 | 23.5 | 6/6/2010 17:36:01 | 25.554 |
| 6/5/2010 19:47:01 | 24.492 | 8/11/2010 14:49:00 | 23.5 | 6/6/2010 17:56:01 | 25.554 |
| 6/5/2010 20:07:01 | 24.492 | 8/11/2010 15:24:00 | 24.0 | 6/6/2010 18:16:01 | 25.554 |
| 6/5/2010 20:27:01 | 24.492 | 8/11/2010 15:59:00 | 24.0 | 6/6/2010 18:36:01 | 25.617 |
| 6/5/2010 20:47:01 | 24.492 | 8/11/2010 16:34:00 | 24.0 | 6/6/2010 18:56:01 | 25.617 |
| 6/5/2010 21:07:01 | 24.554 | 8/11/2010 17:09:00 | 24.0 | 6/6/2010 19:16:01 | 25.617 |
| 6/5/2010 21:27:01 | 24.554 | 8/11/2010 17:44:00 | 24.0 | 6/6/2010 19:36:01 | 25.617 |
| 6/5/2010 21:47:01 | 24.554 | 8/11/2010 18:19:00 | 24.0 | 6/6/2010 19:56:01 | 25.617 |
| 6/5/2010 22:07:01 | 24.554 | 8/11/2010 18:54:00 | 24.0 | 6/6/2010 20:16:01 | 25.679 |
| 6/5/2010 22:27:01 | 24.554 | 8/11/2010 19:29:00 | 24.0 | 6/6/2010 20:36:01 | 25.679 |
| 6/5/2010 22:47:01 | 24.554 | 8/11/2010 20:04:00 | 24.0 | 6/6/2010 20:56:01 | 25.679 |
| 6/5/2010 23:07:01 | 24.554 | 8/11/2010 20:39:00 | 24.0 | 6/6/2010 21:16:01 | 25.679 |
| 6/5/2010 23:27:01 | 24.554 | 8/11/2010 21:14:00 | 24.0 | 6/6/2010 21:36:01 | 25.679 |
| 6/5/2010 23:47:01 | 24.554 | 8/11/2010 21:49:00 | 24.0 | 6/6/2010 21:56:01 | 25.742 |
| 6/6/2010 00:07:01 | 24.492 | 8/11/2010 22:24:00 | 24.0 | 6/6/2010 22:16:01 | 25.742 |
| 6/6/2010 00:27:01 | 24.492 | 8/11/2010 22:59:00 | 24.0 | 6/6/2010 22:36:01 | 25.742 |
| 6/6/2010 00:47:01 | 24.492 | 8/11/2010 23:34:00 | 24.0 | 6/6/2010 22:56:01 | 25.742 |
| 6/6/2010 01:07:01 | 24.492 | 8/12/2010 00:09:00 | 24.0 | 6/6/2010 23:16:01 | 25.742 |
| 6/6/2010 01:27:01 | 24.492 | 8/12/2010 00:44:00 | 24.0 | 6/6/2010 23:36:01 | 25.742 |

|                   |        |                    |      |                   |        |
|-------------------|--------|--------------------|------|-------------------|--------|
| 6/6/2010 01:47:01 | 24.492 | 8/12/2010 01:19:00 | 24.0 | 6/6/2010 23:56:01 | 25.742 |
| 6/6/2010 02:07:01 | 24.429 | 8/12/2010 01:54:00 | 24.0 | 6/7/2010 00:16:01 | 25.804 |
| 6/6/2010 02:27:01 | 24.429 | 8/12/2010 02:29:00 | 24.0 | 6/7/2010 00:36:01 | 25.804 |
| 6/6/2010 02:47:01 | 24.429 | 8/12/2010 03:04:00 | 24.0 | 6/7/2010 00:56:01 | 25.804 |
| 6/6/2010 03:07:01 | 24.429 | 8/12/2010 03:39:00 | 24.0 | 6/7/2010 01:16:01 | 25.804 |
| 6/6/2010 03:27:01 | 24.429 | 8/12/2010 04:14:00 | 24.0 | 6/7/2010 01:36:01 | 25.804 |
| 6/6/2010 03:47:01 | 24.429 | 8/12/2010 04:49:00 | 24.0 | 6/7/2010 01:56:01 | 25.804 |
| 6/6/2010 04:07:01 | 24.367 | 8/12/2010 05:24:00 | 24.0 | 6/7/2010 02:16:01 | 25.804 |
| 6/6/2010 04:27:01 | 24.367 | 8/12/2010 05:59:00 | 24.0 | 6/7/2010 02:36:01 | 25.804 |
| 6/6/2010 04:47:01 | 24.367 | 8/12/2010 06:34:00 | 24.0 | 6/7/2010 02:56:01 | 25.804 |
| 6/6/2010 05:07:01 | 24.367 | 8/12/2010 07:09:00 | 24.0 | 6/7/2010 03:16:01 | 25.804 |
| 6/6/2010 05:27:01 | 24.367 | 8/12/2010 07:44:00 | 24.0 | 6/7/2010 03:36:01 | 25.804 |
| 6/6/2010 05:47:01 | 24.304 | 8/12/2010 08:19:00 | 24.0 | 6/7/2010 03:56:01 | 25.804 |
| 6/6/2010 06:07:01 | 24.304 | 8/12/2010 08:54:00 | 24.0 | 6/7/2010 04:16:01 | 25.804 |
| 6/6/2010 06:27:01 | 24.304 | 8/12/2010 09:29:00 | 24.0 | 6/7/2010 04:36:01 | 25.804 |
| 6/6/2010 06:47:01 | 24.304 | 8/12/2010 10:04:00 | 24.0 | 6/7/2010 04:56:01 | 25.804 |
| 6/6/2010 07:07:01 | 24.304 | 8/12/2010 10:39:00 | 24.0 | 6/7/2010 05:16:01 | 25.804 |
| 6/6/2010 07:27:01 | 24.242 | 8/12/2010 11:14:00 | 24.0 | 6/7/2010 05:36:01 | 25.804 |
| 6/6/2010 07:47:01 | 24.242 | 8/12/2010 11:49:00 | 24.0 | 6/7/2010 05:56:01 | 25.804 |
| 6/6/2010 08:07:01 | 24.242 | 8/12/2010 12:24:00 | 24.0 | 6/7/2010 06:16:01 | 25.742 |
| 6/6/2010 08:27:01 | 24.242 | 8/12/2010 12:59:00 | 24.0 | 6/7/2010 06:36:01 | 25.742 |
| 6/6/2010 08:47:01 | 24.179 | 8/12/2010 13:34:00 | 24.0 | 6/7/2010 06:56:01 | 25.742 |
| 6/6/2010 09:07:01 | 24.179 | 8/12/2010 14:09:00 | 24.0 | 6/7/2010 07:16:01 | 25.742 |
| 6/6/2010 09:27:01 | 24.179 | 8/12/2010 14:44:00 | 24.0 | 6/7/2010 07:36:01 | 25.742 |
| 6/6/2010 09:47:01 | 24.179 | 8/12/2010 15:19:00 | 24.0 | 6/7/2010 07:56:01 | 25.742 |
| 6/6/2010 10:07:01 | 24.179 | 8/12/2010 15:54:00 | 24.0 | 6/7/2010 08:16:01 | 25.742 |
| 6/6/2010 10:27:01 | 24.117 | 8/12/2010 16:29:00 | 24.0 | 6/7/2010 08:36:01 | 25.742 |
| 6/6/2010 10:47:01 | 24.117 | 8/12/2010 17:04:00 | 24.0 | 6/7/2010 08:56:01 | 25.742 |
| 6/6/2010 11:07:01 | 24.117 | 8/12/2010 17:39:00 | 24.0 | 6/7/2010 09:16:01 | 25.679 |
| 6/6/2010 11:27:01 | 24.117 | 8/12/2010 18:14:00 | 24.0 | 6/7/2010 09:36:01 | 25.679 |
| 6/6/2010 11:47:01 | 24.117 | 8/12/2010 18:49:00 | 24.5 | 6/7/2010 09:56:01 | 25.679 |
| 6/6/2010 12:07:01 | 24.117 | 8/12/2010 19:24:00 | 24.5 | 6/7/2010 10:16:01 | 25.679 |
| 6/6/2010 12:27:01 | 24.117 | 8/12/2010 19:59:00 | 24.5 | 6/7/2010 10:36:01 | 25.679 |
| 6/6/2010 12:47:01 | 24.117 | 8/12/2010 20:34:00 | 24.5 | 6/7/2010 10:56:01 | 25.679 |
| 6/6/2010 13:07:01 | 24.117 | 8/12/2010 21:09:00 | 24.5 | 6/7/2010 11:16:01 | 25.617 |
| 6/6/2010 13:27:01 | 24.117 | 8/12/2010 21:44:00 | 24.5 | 6/7/2010 11:36:01 | 25.617 |
| 6/6/2010 13:47:01 | 24.117 | 8/12/2010 22:19:00 | 24.5 | 6/7/2010 11:56:01 | 25.617 |
| 6/6/2010 14:07:01 | 24.117 | 8/12/2010 22:54:00 | 24.5 | 6/7/2010 12:16:01 | 25.617 |
| 6/6/2010 14:27:01 | 24.117 | 8/12/2010 23:29:00 | 24.5 | 6/7/2010 12:36:01 | 25.617 |
| 6/6/2010 14:47:01 | 24.179 | 8/13/2010 00:04:00 | 24.5 | 6/7/2010 12:56:01 | 25.554 |
| 6/6/2010 15:07:01 | 24.179 | 8/13/2010 00:39:00 | 24.0 | 6/7/2010 13:16:01 | 25.554 |
| 6/6/2010 15:27:01 | 24.179 | 8/13/2010 01:14:00 | 24.0 | 6/7/2010 13:36:01 | 25.554 |
| 6/6/2010 15:47:01 | 24.242 | 8/13/2010 01:49:00 | 24.0 | 6/7/2010 13:56:01 | 25.554 |
| 6/6/2010 16:07:01 | 24.242 | 8/13/2010 02:24:00 | 24.0 | 6/7/2010 14:16:01 | 25.554 |
| 6/6/2010 16:27:01 | 24.304 | 8/13/2010 02:59:00 | 24.0 | 6/7/2010 14:36:01 | 25.554 |
| 6/6/2010 16:47:01 | 24.304 | 8/13/2010 03:34:00 | 24.0 | 6/7/2010 14:56:01 | 25.554 |
| 6/6/2010 17:07:01 | 24.367 | 8/13/2010 04:09:00 | 24.0 | 6/7/2010 15:16:01 | 25.554 |
| 6/6/2010 17:27:01 | 24.367 | 8/13/2010 04:44:00 | 24.0 | 6/7/2010 15:36:01 | 25.554 |
| 6/6/2010 17:47:01 | 24.429 | 8/13/2010 05:19:00 | 24.0 | 6/7/2010 15:56:01 | 25.554 |
| 6/6/2010 18:07:01 | 24.429 | 8/13/2010 05:54:00 | 24.0 | 6/7/2010 16:16:01 | 25.554 |

|                   |        |                    |      |                   |        |
|-------------------|--------|--------------------|------|-------------------|--------|
| 6/6/2010 18:27:01 | 24.492 | 8/13/2010 06:29:00 | 24.0 | 6/7/2010 16:36:01 | 25.554 |
| 6/6/2010 18:47:01 | 24.492 | 8/13/2010 07:04:00 | 23.5 | 6/7/2010 16:56:01 | 25.554 |
| 6/6/2010 19:07:01 | 24.492 | 8/13/2010 07:39:00 | 23.5 | 6/7/2010 17:16:01 | 25.554 |
| 6/6/2010 19:27:01 | 24.554 | 8/13/2010 08:14:00 | 23.5 | 6/7/2010 17:36:01 | 25.554 |
| 6/6/2010 19:47:01 | 24.554 | 8/13/2010 08:49:00 | 23.5 | 6/7/2010 17:56:01 | 25.617 |
| 6/6/2010 20:07:01 | 24.554 | 8/13/2010 09:24:00 | 23.5 | 6/7/2010 18:16:01 | 25.617 |
| 6/6/2010 20:27:01 | 24.554 | 8/13/2010 09:59:00 | 23.5 | 6/7/2010 18:36:01 | 25.617 |
| 6/6/2010 20:47:01 | 24.554 | 8/13/2010 10:34:00 | 23.5 | 6/7/2010 18:56:01 | 25.617 |
| 6/6/2010 21:07:01 | 24.554 | 8/13/2010 11:09:00 | 23.5 | 6/7/2010 19:16:01 | 25.617 |
| 6/6/2010 21:27:01 | 24.617 | 8/13/2010 11:44:00 | 23.5 | 6/7/2010 19:36:01 | 25.679 |
| 6/6/2010 21:47:01 | 24.617 | 8/13/2010 12:19:00 | 23.5 | 6/7/2010 19:56:01 | 25.679 |
| 6/6/2010 22:07:01 | 24.617 | 8/13/2010 12:54:00 | 23.5 | 6/7/2010 20:16:01 | 25.679 |
| 6/6/2010 22:27:01 | 24.617 | 8/13/2010 13:29:00 | 23.5 | 6/7/2010 20:36:01 | 25.679 |
| 6/6/2010 22:47:01 | 24.617 | 8/13/2010 14:04:00 | 23.5 | 6/7/2010 20:56:01 | 25.742 |
| 6/6/2010 23:07:01 | 24.617 | 8/13/2010 14:39:00 | 23.5 | 6/7/2010 21:16:01 | 25.742 |
| 6/6/2010 23:27:01 | 24.617 | 8/13/2010 15:14:00 | 23.5 | 6/7/2010 21:36:01 | 25.742 |
| 6/6/2010 23:47:01 | 24.554 | 8/13/2010 15:49:00 | 23.5 | 6/7/2010 21:56:01 | 25.742 |
| 6/7/2010 00:07:01 | 24.554 | 8/13/2010 16:24:00 | 23.5 | 6/7/2010 22:16:01 | 25.804 |
| 6/7/2010 00:27:01 | 24.554 | 8/13/2010 16:59:00 | 23.5 | 6/7/2010 22:36:01 | 25.804 |
| 6/7/2010 00:47:01 | 24.554 | 8/13/2010 17:34:00 | 23.5 | 6/7/2010 22:56:01 | 25.804 |
| 6/7/2010 01:07:01 | 24.554 | 8/13/2010 18:09:00 | 24.0 | 6/7/2010 23:16:01 | 25.804 |
| 6/7/2010 01:27:01 | 24.554 | 8/13/2010 18:44:00 | 24.0 | 6/7/2010 23:36:01 | 25.804 |
| 6/7/2010 01:47:01 | 24.492 | 8/13/2010 19:19:00 | 24.0 | 6/7/2010 23:56:01 | 25.867 |
| 6/7/2010 02:07:01 | 24.554 | 8/13/2010 19:54:00 | 24.0 | 6/8/2010 00:16:01 | 25.867 |
| 6/7/2010 02:27:01 | 24.492 | 8/13/2010 20:29:00 | 24.0 | 6/8/2010 00:36:01 | 25.867 |
| 6/7/2010 02:47:01 | 24.492 | 8/13/2010 21:04:00 | 24.0 | 6/8/2010 00:56:01 | 25.867 |
| 6/7/2010 03:07:01 | 24.492 | 8/13/2010 21:39:00 | 24.0 | 6/8/2010 01:16:01 | 25.867 |
| 6/7/2010 03:27:01 | 24.492 | 8/13/2010 22:14:00 | 24.0 | 6/8/2010 01:36:01 | 25.867 |
| 6/7/2010 03:47:01 | 24.429 | 8/13/2010 22:49:00 | 24.0 | 6/8/2010 01:56:01 | 25.867 |
| 6/7/2010 04:07:01 | 24.429 | 8/13/2010 23:24:00 | 24.0 | 6/8/2010 02:16:01 | 25.867 |
| 6/7/2010 04:27:01 | 24.429 | 8/13/2010 23:59:00 | 24.0 | 6/8/2010 02:36:01 | 25.867 |
| 6/7/2010 04:47:01 | 24.429 | 8/14/2010 00:34:00 | 24.0 | 6/8/2010 02:56:01 | 25.929 |
| 6/7/2010 05:07:01 | 24.429 | 8/14/2010 01:09:00 | 24.0 | 6/8/2010 03:16:01 | 25.929 |
| 6/7/2010 05:27:01 | 24.367 | 8/14/2010 01:44:00 | 24.0 | 6/8/2010 03:36:01 | 25.929 |
| 6/7/2010 05:47:01 | 24.367 | 8/14/2010 02:19:00 | 23.5 | 6/8/2010 03:56:01 | 25.929 |
| 6/7/2010 06:07:01 | 24.367 | 8/14/2010 02:54:00 | 23.5 | 6/8/2010 04:16:01 | 25.929 |
| 6/7/2010 06:27:01 | 24.367 | 8/14/2010 03:29:00 | 23.5 | 6/8/2010 04:36:01 | 25.929 |
| 6/7/2010 06:47:01 | 24.304 | 8/14/2010 04:04:00 | 23.5 | 6/8/2010 04:56:01 | 25.929 |
| 6/7/2010 07:07:01 | 24.304 | 8/14/2010 04:39:00 | 23.5 | 6/8/2010 05:16:01 | 25.929 |
| 6/7/2010 07:27:01 | 24.304 | 8/14/2010 05:14:00 | 23.5 | 6/8/2010 05:36:01 | 25.929 |
| 6/7/2010 07:47:01 | 24.242 | 8/14/2010 05:49:00 | 23.5 | 6/8/2010 05:56:01 | 25.929 |
| 6/7/2010 08:07:01 | 24.242 | 8/14/2010 06:24:00 | 23.5 | 6/8/2010 06:16:01 | 25.867 |
| 6/7/2010 08:27:01 | 24.242 | 8/14/2010 06:59:00 | 23.5 | 6/8/2010 06:36:01 | 25.867 |
| 6/7/2010 08:47:01 | 24.242 | 8/14/2010 07:34:00 | 23.5 | 6/8/2010 06:56:01 | 25.867 |
| 6/7/2010 09:07:01 | 24.179 | 8/14/2010 08:09:00 | 23.0 | 6/8/2010 07:16:01 | 25.867 |
| 6/7/2010 09:27:01 | 24.179 | 8/14/2010 08:44:00 | 23.0 | 6/8/2010 07:36:01 | 25.867 |
| 6/7/2010 09:47:01 | 24.179 | 8/14/2010 09:19:00 | 23.0 | 6/8/2010 07:56:01 | 25.867 |
| 6/7/2010 10:07:01 | 24.179 | 8/14/2010 09:54:00 | 23.0 | 6/8/2010 08:16:01 | 25.867 |
| 6/7/2010 10:27:01 | 24.117 | 8/14/2010 10:29:00 | 23.0 | 6/8/2010 08:36:01 | 25.867 |
| 6/7/2010 10:47:01 | 24.117 | 8/14/2010 11:04:00 | 23.0 | 6/8/2010 08:56:01 | 25.867 |

|                   |                           |                        |        |
|-------------------|---------------------------|------------------------|--------|
| 6/7/2010 11:07:01 | 24.117 8/14/2010 11:39:00 | 23.0 6/8/2010 09:16:01 | 25.804 |
| 6/7/2010 11:27:01 | 24.117 8/14/2010 12:14:00 | 23.0 6/8/2010 09:36:01 | 25.804 |
| 6/7/2010 11:47:01 | 24.117 8/14/2010 12:49:00 | 23.0 6/8/2010 09:56:01 | 25.804 |
| 6/7/2010 12:07:01 | 24.117 8/14/2010 13:24:00 | 23.0 6/8/2010 10:16:01 | 25.804 |
| 6/7/2010 12:27:01 | 24.117 8/14/2010 13:59:00 | 23.0 6/8/2010 10:36:01 | 25.804 |
| 6/7/2010 12:47:01 | 24.117 8/14/2010 14:34:00 | 23.0 6/8/2010 10:56:01 | 25.804 |
| 6/7/2010 13:07:01 | 24.117 8/14/2010 15:09:00 | 23.0 6/8/2010 11:16:01 | 25.804 |
| 6/7/2010 13:27:01 | 24.117 8/14/2010 15:44:00 | 23.0 6/8/2010 11:36:01 | 25.742 |
| 6/7/2010 13:47:01 | 24.117 8/14/2010 16:19:00 | 23.5 6/8/2010 11:56:01 | 25.742 |
| 6/7/2010 14:07:01 | 24.117 8/14/2010 16:54:00 | 23.5 6/8/2010 12:16:01 | 25.742 |
| 6/7/2010 14:27:01 | 24.179 8/14/2010 17:29:00 | 23.5 6/8/2010 12:36:01 | 25.742 |
| 6/7/2010 14:47:01 | 24.179 8/14/2010 18:04:00 | 23.5 6/8/2010 12:56:01 | 25.742 |
| 6/7/2010 15:07:01 | 24.242 8/14/2010 18:39:00 | 23.5 6/8/2010 13:16:01 | 25.742 |
| 6/7/2010 15:27:01 | 24.242 8/14/2010 19:14:00 | 23.5 6/8/2010 13:36:01 | 25.742 |
| 6/7/2010 15:47:01 | 24.304 8/14/2010 19:49:00 | 23.5 6/8/2010 13:56:01 | 25.742 |
| 6/7/2010 16:07:01 | 24.367 8/14/2010 20:24:00 | 23.5 6/8/2010 14:16:01 | 25.679 |
| 6/7/2010 16:27:01 | 24.367 8/14/2010 20:59:00 | 23.5 6/8/2010 14:36:01 | 25.679 |
| 6/7/2010 16:47:01 | 24.429 8/14/2010 21:34:00 | 23.5 6/8/2010 14:56:01 | 25.679 |
| 6/7/2010 17:07:01 | 24.429 8/14/2010 22:09:00 | 23.5 6/8/2010 15:16:01 | 25.679 |
| 6/7/2010 17:27:01 | 24.492 8/14/2010 22:44:00 | 23.5 6/8/2010 15:36:01 | 25.742 |
| 6/7/2010 17:47:01 | 24.554 8/14/2010 23:19:00 | 23.5 6/8/2010 15:56:01 | 25.742 |
| 6/7/2010 18:07:01 | 24.554 8/14/2010 23:54:00 | 23.5 6/8/2010 16:16:01 | 25.742 |
| 6/7/2010 18:27:01 | 24.617 8/15/2010 00:29:00 | 23.5 6/8/2010 16:36:01 | 25.742 |
| 6/7/2010 18:47:01 | 24.617 8/15/2010 01:04:00 | 23.5 6/8/2010 16:56:01 | 25.742 |
| 6/7/2010 19:07:01 | 24.679 8/15/2010 01:39:00 | 23.5 6/8/2010 17:16:01 | 25.742 |
| 6/7/2010 19:27:01 | 24.679 8/15/2010 02:14:00 | 23.5 6/8/2010 17:36:01 | 25.742 |
| 6/7/2010 19:47:01 | 24.679 8/15/2010 02:49:00 | 23.0 6/8/2010 17:56:01 | 25.742 |
| 6/7/2010 20:07:01 | 24.742 8/15/2010 03:24:00 | 23.0 6/8/2010 18:16:01 | 25.742 |
| 6/7/2010 20:27:01 | 24.742 8/15/2010 03:59:00 | 23.0 6/8/2010 18:36:01 | 25.804 |
| 6/7/2010 20:47:01 | 24.742 8/15/2010 04:34:00 | 23.0 6/8/2010 18:56:01 | 25.804 |
| 6/7/2010 21:07:01 | 24.742 8/15/2010 05:09:00 | 23.0 6/8/2010 19:16:01 | 25.804 |
| 6/7/2010 21:27:01 | 24.742 8/15/2010 05:44:00 | 23.0 6/8/2010 19:36:01 | 25.804 |
| 6/7/2010 21:47:01 | 24.804 8/15/2010 06:19:00 | 23.0 6/8/2010 19:56:01 | 25.804 |
| 6/7/2010 22:07:01 | 24.804 8/15/2010 06:54:00 | 23.0 6/8/2010 20:16:01 | 25.867 |
| 6/7/2010 22:27:01 | 24.804 8/15/2010 07:29:00 | 23.0 6/8/2010 20:36:01 | 25.867 |
| 6/7/2010 22:47:01 | 24.804 8/15/2010 08:04:00 | 23.0 6/8/2010 20:56:01 | 25.867 |
| 6/7/2010 23:07:01 | 24.804 8/15/2010 08:39:00 | 23.0 6/8/2010 21:16:01 | 25.867 |
| 6/7/2010 23:27:01 | 24.804 8/15/2010 09:14:00 | 23.0 6/8/2010 21:36:01 | 25.929 |
| 6/7/2010 23:47:01 | 24.804 8/15/2010 09:49:00 | 23.0 6/8/2010 21:56:01 | 25.929 |
| 6/8/2010 00:07:01 | 24.742 8/15/2010 10:24:00 | 23.0 6/8/2010 22:16:01 | 25.929 |
| 6/8/2010 00:27:01 | 24.804 8/15/2010 10:59:00 | 23.0 6/8/2010 22:36:01 | 25.929 |
| 6/8/2010 00:47:01 | 24.742 8/15/2010 11:34:00 | 23.0 6/8/2010 22:56:01 | 25.929 |
| 6/8/2010 01:07:01 | 24.742 8/15/2010 12:09:00 | 23.0 6/8/2010 23:16:01 | 25.929 |
| 6/8/2010 01:27:01 | 24.742 8/15/2010 12:44:00 | 23.0 6/8/2010 23:36:01 | 25.929 |
| 6/8/2010 01:47:01 | 24.742 8/15/2010 13:19:00 | 23.0 6/8/2010 23:56:01 | 25.992 |
| 6/8/2010 02:07:01 | 24.742 8/15/2010 13:54:00 | 23.0 6/9/2010 00:16:01 | 25.992 |
| 6/8/2010 02:27:01 | 24.742 8/15/2010 14:29:00 | 23.0 6/9/2010 00:36:01 | 25.992 |
| 6/8/2010 02:47:01 | 24.679 8/15/2010 15:04:00 | 23.0 6/9/2010 00:56:01 | 25.992 |
| 6/8/2010 03:07:01 | 24.679 8/15/2010 15:39:00 | 23.0 6/9/2010 01:16:01 | 25.992 |
| 6/8/2010 03:27:01 | 24.679 8/15/2010 16:14:00 | 23.0 6/9/2010 01:36:01 | 25.992 |



|                   |        |                    |      |                   |        |
|-------------------|--------|--------------------|------|-------------------|--------|
| 6/8/2010 03:47:01 | 24.679 | 8/15/2010 16:49:00 | 23.0 | 6/9/2010 01:56:01 | 25.992 |
| 6/8/2010 04:07:01 | 24.679 | 8/15/2010 17:24:00 | 23.5 | 6/9/2010 02:16:01 | 25.992 |
| 6/8/2010 04:27:01 | 24.617 | 8/15/2010 17:59:00 | 23.5 | 6/9/2010 02:36:01 | 25.992 |
| 6/8/2010 04:47:01 | 24.617 | 8/15/2010 18:34:00 | 23.5 | 6/9/2010 02:56:01 | 25.992 |
| 6/8/2010 05:07:01 | 24.617 | 8/15/2010 19:09:00 | 23.5 | 6/9/2010 03:16:01 | 25.992 |
| 6/8/2010 05:27:01 | 24.617 | 8/15/2010 19:44:00 | 23.5 | 6/9/2010 03:36:01 | 25.992 |
| 6/8/2010 05:47:01 | 24.554 | 8/15/2010 20:19:00 | 23.5 | 6/9/2010 03:56:01 | 25.992 |
| 6/8/2010 06:07:01 | 24.554 | 8/15/2010 20:54:00 | 23.5 | 6/9/2010 04:16:01 | 25.929 |
| 6/8/2010 06:27:01 | 24.554 | 8/15/2010 21:29:00 | 23.5 | 6/9/2010 04:36:01 | 25.929 |
| 6/8/2010 06:47:01 | 24.554 | 8/15/2010 22:04:00 | 23.5 | 6/9/2010 04:56:01 | 25.929 |
| 6/8/2010 07:07:01 | 24.492 | 8/15/2010 22:39:00 | 23.5 | 6/9/2010 05:16:01 | 25.929 |
| 6/8/2010 07:27:01 | 24.492 | 8/15/2010 23:14:00 | 23.5 | 6/9/2010 05:36:01 | 25.929 |
| 6/8/2010 07:47:01 | 24.492 | 8/15/2010 23:49:00 | 23.5 | 6/9/2010 05:56:01 | 25.929 |
| 6/8/2010 08:07:01 | 24.492 | 8/16/2010 00:24:00 | 23.5 | 6/9/2010 06:16:01 | 25.929 |
| 6/8/2010 08:27:01 | 24.429 | 8/16/2010 00:59:00 | 23.5 | 6/9/2010 06:36:01 | 25.867 |
| 6/8/2010 08:47:01 | 24.429 | 8/16/2010 01:34:00 | 23.5 | 6/9/2010 06:56:01 | 25.867 |
| 6/8/2010 09:07:01 | 24.429 | 8/16/2010 02:09:00 | 23.0 | 6/9/2010 07:16:01 | 25.867 |
| 6/8/2010 09:27:01 | 24.367 | 8/16/2010 02:44:00 | 23.0 | 6/9/2010 07:36:01 | 25.867 |
| 6/8/2010 09:47:01 | 24.367 | 8/16/2010 03:19:00 | 23.0 | 6/9/2010 07:56:01 | 25.867 |
| 6/8/2010 10:07:01 | 24.367 | 8/16/2010 03:54:00 | 23.0 | 6/9/2010 08:16:01 | 25.804 |
| 6/8/2010 10:27:01 | 24.367 | 8/16/2010 04:29:00 | 23.0 | 6/9/2010 08:36:01 | 25.804 |
| 6/8/2010 10:47:01 | 24.304 | 8/16/2010 05:04:00 | 23.0 | 6/9/2010 08:56:01 | 25.804 |
| 6/8/2010 11:07:01 | 24.304 | 8/16/2010 05:39:00 | 23.0 | 6/9/2010 09:16:01 | 25.804 |
| 6/8/2010 11:27:01 | 24.304 | 8/16/2010 06:14:00 | 23.0 | 6/9/2010 09:36:01 | 25.804 |
| 6/8/2010 11:47:01 | 24.304 | 8/16/2010 06:49:00 | 23.0 | 6/9/2010 09:56:01 | 25.742 |
| 6/8/2010 12:07:01 | 24.304 | 8/16/2010 07:24:00 | 22.5 | 6/9/2010 10:16:01 | 25.742 |
| 6/8/2010 12:27:01 | 24.304 | 8/16/2010 07:59:00 | 22.5 | 6/9/2010 10:36:01 | 25.742 |
| 6/8/2010 12:47:01 | 24.304 | 8/16/2010 08:34:00 | 22.5 | 6/9/2010 10:56:01 | 25.742 |
| 6/8/2010 13:07:01 | 24.304 | 8/16/2010 09:09:00 | 22.5 | 6/9/2010 11:16:01 | 25.679 |
| 6/8/2010 13:27:01 | 24.304 | 8/16/2010 09:44:00 | 22.5 | 6/9/2010 11:36:01 | 25.679 |
| 6/8/2010 13:47:01 | 24.304 | 8/16/2010 10:19:00 | 22.5 | 6/9/2010 11:56:01 | 25.679 |
| 6/8/2010 14:07:01 | 24.367 | 8/16/2010 10:54:00 | 22.5 | 6/9/2010 12:16:01 | 25.679 |
| 6/8/2010 14:27:01 | 24.367 | 8/16/2010 11:29:00 | 22.5 | 6/9/2010 12:36:01 | 25.617 |
| 6/8/2010 14:47:01 | 24.429 | 8/16/2010 12:04:00 | 22.5 | 6/9/2010 12:56:01 | 25.617 |
| 6/8/2010 15:07:01 | 24.429 | 8/16/2010 12:39:00 | 22.5 | 6/9/2010 13:16:01 | 25.617 |
| 6/8/2010 15:27:01 | 24.429 | 8/16/2010 13:14:00 | 22.5 | 6/9/2010 13:36:01 | 25.617 |
| 6/8/2010 15:47:01 | 24.492 | 8/16/2010 13:49:00 | 22.5 | 6/9/2010 13:56:01 | 25.617 |
| 6/8/2010 16:07:01 | 24.554 | 8/16/2010 14:24:00 | 22.5 | 6/9/2010 14:16:01 | 25.554 |
| 6/8/2010 16:27:01 | 24.554 | 8/16/2010 14:59:00 | 22.5 | 6/9/2010 14:36:01 | 25.554 |
| 6/8/2010 16:47:01 | 24.617 | 8/16/2010 15:34:00 | 22.5 | 6/9/2010 14:56:01 | 25.554 |
| 6/8/2010 17:07:01 | 24.617 | 8/16/2010 16:09:00 | 23.0 | 6/9/2010 15:16:01 | 25.554 |
| 6/8/2010 17:27:01 | 24.679 | 8/16/2010 16:44:00 | 23.0 | 6/9/2010 15:36:01 | 25.554 |
| 6/8/2010 17:47:01 | 24.679 | 8/16/2010 17:19:00 | 23.0 | 6/9/2010 15:56:01 | 25.554 |
| 6/8/2010 18:07:01 | 24.742 | 8/16/2010 17:54:00 | 23.0 | 6/9/2010 16:16:01 | 25.554 |
| 6/8/2010 18:27:01 | 24.742 | 8/16/2010 18:29:00 | 23.0 | 6/9/2010 16:36:01 | 25.554 |
| 6/8/2010 18:47:01 | 24.804 | 8/16/2010 19:04:00 | 23.0 | 6/9/2010 16:56:01 | 25.554 |
| 6/8/2010 19:07:01 | 24.804 | 8/16/2010 19:39:00 | 23.0 | 6/9/2010 17:16:01 | 25.554 |
| 6/8/2010 19:27:01 | 24.804 | 8/16/2010 20:14:00 | 23.0 | 6/9/2010 17:36:01 | 25.554 |
| 6/8/2010 19:47:01 | 24.804 | 8/16/2010 20:49:00 | 23.0 | 6/9/2010 17:56:01 | 25.554 |
| 6/8/2010 20:07:01 | 24.867 | 8/16/2010 21:24:00 | 23.0 | 6/9/2010 18:16:01 | 25.554 |

|                   |        |                    |      |                    |        |
|-------------------|--------|--------------------|------|--------------------|--------|
| 6/8/2010 20:27:01 | 24.867 | 8/16/2010 21:59:00 | 23.5 | 6/9/2010 18:36:01  | 25.554 |
| 6/8/2010 20:47:01 | 24.867 | 8/16/2010 22:34:00 | 23.5 | 6/9/2010 18:56:01  | 25.617 |
| 6/8/2010 21:07:01 | 24.867 | 8/16/2010 23:09:00 | 23.5 | 6/9/2010 19:16:01  | 25.617 |
| 6/8/2010 21:27:01 | 24.867 | 8/16/2010 23:44:00 | 23.5 | 6/9/2010 19:36:01  | 25.617 |
| 6/8/2010 21:47:01 | 24.867 | 8/17/2010 00:19:00 | 23.5 | 6/9/2010 19:56:01  | 25.617 |
| 6/8/2010 22:07:01 | 24.867 | 8/17/2010 00:54:00 | 23.5 | 6/9/2010 20:16:01  | 25.617 |
| 6/8/2010 22:27:01 | 24.867 | 8/17/2010 01:29:00 | 23.0 | 6/9/2010 20:36:01  | 25.617 |
| 6/8/2010 22:47:01 | 24.867 | 8/17/2010 02:04:00 | 23.0 | 6/9/2010 20:56:01  | 25.679 |
| 6/8/2010 23:07:01 | 24.867 | 8/17/2010 02:39:00 | 23.0 | 6/9/2010 21:16:01  | 25.679 |
| 6/8/2010 23:27:01 | 24.804 | 8/17/2010 03:14:00 | 23.0 | 6/9/2010 21:36:01  | 25.679 |
| 6/8/2010 23:47:01 | 24.804 | 8/17/2010 03:49:00 | 23.0 | 6/9/2010 21:56:01  | 25.679 |
| 6/9/2010 00:07:01 | 24.804 | 8/17/2010 04:24:00 | 23.0 | 6/9/2010 22:16:01  | 25.679 |
| 6/9/2010 00:27:01 | 24.804 | 8/17/2010 04:59:00 | 23.0 | 6/9/2010 22:36:01  | 25.679 |
| 6/9/2010 00:47:01 | 24.804 | 8/17/2010 05:34:00 | 23.0 | 6/9/2010 22:56:01  | 25.679 |
| 6/9/2010 01:07:01 | 24.742 | 8/17/2010 06:09:00 | 23.0 | 6/9/2010 23:16:01  | 25.742 |
| 6/9/2010 01:27:01 | 24.742 | 8/17/2010 06:44:00 | 23.0 | 6/9/2010 23:36:01  | 25.742 |
| 6/9/2010 01:47:01 | 24.742 | 8/17/2010 07:19:00 | 23.0 | 6/9/2010 23:56:01  | 25.742 |
| 6/9/2010 02:07:01 | 24.679 | 8/17/2010 07:54:00 | 23.0 | 6/10/2010 00:16:01 | 25.742 |
| 6/9/2010 02:27:01 | 24.679 | 8/17/2010 08:29:00 | 22.5 | 6/10/2010 00:36:01 | 25.742 |
| 6/9/2010 02:47:01 | 24.679 | 8/17/2010 09:04:00 | 22.5 | 6/10/2010 00:56:01 | 25.742 |
| 6/9/2010 03:07:01 | 24.617 | 8/17/2010 09:39:00 | 22.5 | 6/10/2010 01:16:01 | 25.742 |
| 6/9/2010 03:27:01 | 24.617 | 8/17/2010 10:14:00 | 22.5 | 6/10/2010 01:36:01 | 25.742 |
| 6/9/2010 03:47:01 | 24.617 | 8/17/2010 10:49:00 | 22.5 | 6/10/2010 01:56:01 | 25.742 |
| 6/9/2010 04:07:01 | 24.554 | 8/17/2010 11:24:00 | 22.5 | 6/10/2010 02:16:01 | 25.742 |
| 6/9/2010 04:27:01 | 24.554 | 8/17/2010 11:59:00 | 22.5 | 6/10/2010 02:36:01 | 25.742 |
| 6/9/2010 04:47:01 | 24.554 | 8/17/2010 12:34:00 | 22.5 | 6/10/2010 02:56:01 | 25.742 |
| 6/9/2010 05:07:01 | 24.492 | 8/17/2010 13:09:00 | 22.5 | 6/10/2010 03:16:01 | 25.742 |
| 6/9/2010 05:27:01 | 24.492 | 8/17/2010 13:44:00 | 22.5 | 6/10/2010 03:36:01 | 25.742 |
| 6/9/2010 05:47:01 | 24.429 | 8/17/2010 14:19:00 | 23.0 | 6/10/2010 03:56:01 | 25.742 |
| 6/9/2010 06:07:01 | 24.429 | 8/17/2010 14:54:00 | 23.0 | 6/10/2010 04:16:01 | 25.742 |
| 6/9/2010 06:27:01 | 24.429 | 8/17/2010 15:29:00 | 23.0 | 6/10/2010 04:36:01 | 25.742 |
| 6/9/2010 06:47:01 | 24.429 | 8/17/2010 16:04:00 | 23.0 | 6/10/2010 04:56:01 | 25.679 |
| 6/9/2010 07:07:01 | 24.367 | 8/17/2010 16:39:00 | 23.0 | 6/10/2010 05:16:01 | 25.679 |
| 6/9/2010 07:27:01 | 24.367 | 8/17/2010 17:14:00 | 23.0 | 6/10/2010 05:36:01 | 25.679 |
| 6/9/2010 07:47:01 | 24.304 | 8/17/2010 17:49:00 | 23.0 | 6/10/2010 05:56:01 | 25.679 |
| 6/9/2010 08:07:01 | 24.304 | 8/17/2010 18:24:00 | 23.0 | 6/10/2010 06:16:01 | 25.679 |
| 6/9/2010 08:27:01 | 24.304 | 8/17/2010 18:59:00 | 23.0 | 6/10/2010 06:36:01 | 25.679 |
| 6/9/2010 08:47:01 | 24.242 | 8/17/2010 19:34:00 | 23.5 | 6/10/2010 06:56:01 | 25.679 |
| 6/9/2010 09:07:01 | 24.242 | 8/17/2010 20:09:00 | 23.5 | 6/10/2010 07:16:01 | 25.679 |
| 6/9/2010 09:27:01 | 24.242 | 8/17/2010 20:44:00 | 23.5 | 6/10/2010 07:36:01 | 25.617 |
| 6/9/2010 09:47:01 | 24.179 | 8/17/2010 21:19:00 | 23.5 | 6/10/2010 07:56:01 | 25.617 |
| 6/9/2010 10:07:01 | 24.179 | 8/17/2010 21:54:00 | 23.5 | 6/10/2010 08:16:01 | 25.617 |
| 6/9/2010 10:27:01 | 24.179 | 8/17/2010 22:29:00 | 23.5 | 6/10/2010 08:36:01 | 25.617 |
| 6/9/2010 10:47:01 | 24.117 | 8/17/2010 23:04:00 | 23.5 | 6/10/2010 08:56:01 | 25.617 |
| 6/9/2010 11:07:01 | 24.117 | 8/17/2010 23:39:00 | 23.5 | 6/10/2010 09:16:01 | 25.554 |
| 6/9/2010 11:27:01 | 24.117 | 8/18/2010 00:14:00 | 23.5 | 6/10/2010 09:36:01 | 25.554 |
| 6/9/2010 11:47:01 | 24.117 | 8/18/2010 00:49:00 | 23.5 | 6/10/2010 09:56:01 | 25.554 |
| 6/9/2010 12:07:01 | 24.117 | 8/18/2010 01:24:00 | 23.5 | 6/10/2010 10:16:01 | 25.554 |
| 6/9/2010 12:27:01 | 24.117 | 8/18/2010 01:59:00 | 23.5 | 6/10/2010 10:36:01 | 25.554 |
| 6/9/2010 12:47:01 | 24.054 | 8/18/2010 02:34:00 | 23.5 | 6/10/2010 10:56:01 | 25.492 |

|                    |        |                    |      |                    |        |
|--------------------|--------|--------------------|------|--------------------|--------|
| 6/9/2010 13:07:01  | 24.054 | 8/18/2010 03:09:00 | 23.0 | 6/10/2010 11:16:01 | 25.492 |
| 6/9/2010 13:27:01  | 24.117 | 8/18/2010 03:44:00 | 23.0 | 6/10/2010 11:36:01 | 25.492 |
| 6/9/2010 13:47:01  | 24.117 | 8/18/2010 04:19:00 | 23.0 | 6/10/2010 11:56:01 | 25.492 |
| 6/9/2010 14:07:01  | 24.117 | 8/18/2010 04:54:00 | 23.0 | 6/10/2010 12:16:01 | 25.429 |
| 6/9/2010 14:27:01  | 24.117 | 8/18/2010 05:29:00 | 23.0 | 6/10/2010 12:36:01 | 25.429 |
| 6/9/2010 14:47:01  | 24.179 | 8/18/2010 06:04:00 | 23.0 | 6/10/2010 12:56:01 | 25.429 |
| 6/9/2010 15:07:01  | 24.179 | 8/18/2010 06:39:00 | 23.0 | 6/10/2010 13:16:01 | 25.429 |
| 6/9/2010 15:27:01  | 24.179 | 8/18/2010 07:14:00 | 23.0 | 6/10/2010 13:36:01 | 25.429 |
| 6/9/2010 15:47:01  | 24.242 | 8/18/2010 07:49:00 | 23.0 | 6/10/2010 13:56:01 | 25.429 |
| 6/9/2010 16:07:01  | 24.242 | 8/18/2010 08:24:00 | 23.0 | 6/10/2010 14:16:01 | 25.429 |
| 6/9/2010 16:27:01  | 24.304 | 8/18/2010 08:59:00 | 22.5 | 6/10/2010 14:36:01 | 25.429 |
| 6/9/2010 16:47:01  | 24.367 | 8/18/2010 09:34:00 | 22.5 | 6/10/2010 14:56:01 | 25.367 |
| 6/9/2010 17:07:01  | 24.367 | 8/18/2010 10:09:00 | 22.5 | 6/10/2010 15:16:01 | 25.367 |
| 6/9/2010 17:27:01  | 24.429 | 8/18/2010 10:44:00 | 22.5 | 6/10/2010 15:36:01 | 25.367 |
| 6/9/2010 17:47:01  | 24.429 | 8/18/2010 11:19:00 | 22.5 | 6/10/2010 15:56:01 | 25.367 |
| 6/9/2010 18:07:01  | 24.492 | 8/18/2010 11:54:00 | 22.5 | 6/10/2010 16:16:01 | 25.367 |
| 6/9/2010 18:27:01  | 24.492 | 8/18/2010 12:29:00 | 22.5 | 6/10/2010 16:36:01 | 25.367 |
| 6/9/2010 18:47:01  | 24.554 | 8/18/2010 13:04:00 | 22.5 | 6/10/2010 16:56:01 | 25.429 |
| 6/9/2010 19:07:01  | 24.554 | 8/18/2010 13:39:00 | 22.5 | 6/10/2010 17:16:01 | 25.429 |
| 6/9/2010 19:27:01  | 24.554 | 8/18/2010 14:14:00 | 22.5 | 6/10/2010 17:36:01 | 25.429 |
| 6/9/2010 19:47:01  | 24.617 | 8/18/2010 14:49:00 | 23.0 | 6/10/2010 17:56:01 | 25.429 |
| 6/9/2010 20:07:01  | 24.617 | 8/18/2010 15:24:00 | 23.0 | 6/10/2010 18:16:01 | 25.492 |
| 6/9/2010 20:27:01  | 24.617 | 8/18/2010 15:59:00 | 23.0 | 6/10/2010 18:36:01 | 25.492 |
| 6/9/2010 20:47:01  | 24.617 | 8/18/2010 16:34:00 | 23.0 | 6/10/2010 18:56:01 | 25.492 |
| 6/9/2010 21:07:01  | 24.617 | 8/18/2010 17:09:00 | 23.0 | 6/10/2010 19:16:01 | 25.492 |
| 6/9/2010 21:27:01  | 24.617 | 8/18/2010 17:44:00 | 23.0 | 6/10/2010 19:36:01 | 25.492 |
| 6/9/2010 21:47:01  | 24.617 | 8/18/2010 18:19:00 | 23.0 | 6/10/2010 19:56:01 | 25.554 |
| 6/9/2010 22:07:01  | 24.617 | 8/18/2010 18:54:00 | 23.0 | 6/10/2010 20:16:01 | 25.554 |
| 6/9/2010 22:27:01  | 24.617 | 8/18/2010 19:29:00 | 23.0 | 6/10/2010 20:36:01 | 25.554 |
| 6/9/2010 22:47:01  | 24.617 | 8/18/2010 20:04:00 | 23.0 | 6/10/2010 20:56:01 | 25.554 |
| 6/9/2010 23:07:01  | 24.617 | 8/18/2010 20:39:00 | 23.0 | 6/10/2010 21:16:01 | 25.554 |
| 6/9/2010 23:27:01  | 24.617 | 8/18/2010 21:14:00 | 23.0 | 6/10/2010 21:36:01 | 25.617 |
| 6/9/2010 23:47:01  | 24.554 | 8/18/2010 21:49:00 | 23.5 | 6/10/2010 21:56:01 | 25.617 |
| 6/10/2010 00:07:01 | 24.554 | 8/18/2010 22:24:00 | 23.0 | 6/10/2010 22:16:01 | 25.617 |
| 6/10/2010 00:27:01 | 24.554 | 8/18/2010 22:59:00 | 23.5 | 6/10/2010 22:36:01 | 25.617 |
| 6/10/2010 00:47:01 | 24.554 | 8/18/2010 23:34:00 | 23.5 | 6/10/2010 22:56:01 | 25.617 |
| 6/10/2010 01:07:01 | 24.554 | 8/19/2010 00:09:00 | 23.5 | 6/10/2010 23:16:01 | 25.617 |
| 6/10/2010 01:27:01 | 24.492 | 8/19/2010 00:44:00 | 23.5 | 6/10/2010 23:36:01 | 25.617 |
| 6/10/2010 01:47:01 | 24.492 | 8/19/2010 01:19:00 | 23.0 | 6/10/2010 23:56:01 | 25.679 |
| 6/10/2010 02:07:01 | 24.492 | 8/19/2010 01:54:00 | 23.0 | 6/11/2010 00:16:01 | 25.679 |
| 6/10/2010 02:27:01 | 24.429 | 8/19/2010 02:29:00 | 23.0 | 6/11/2010 00:36:01 | 25.679 |
| 6/10/2010 02:47:01 | 24.429 | 8/19/2010 03:04:00 | 23.0 | 6/11/2010 00:56:01 | 25.679 |
| 6/10/2010 03:07:01 | 24.429 | 8/19/2010 03:39:00 | 23.0 | 6/11/2010 01:16:01 | 25.679 |
| 6/10/2010 03:27:01 | 24.429 | 8/19/2010 04:14:00 | 23.0 | 6/11/2010 01:36:01 | 25.679 |
| 6/10/2010 03:47:01 | 24.429 | 8/19/2010 04:49:00 | 23.0 | 6/11/2010 01:56:01 | 25.679 |
| 6/10/2010 04:07:01 | 24.367 | 8/19/2010 05:24:00 | 23.0 | 6/11/2010 02:16:01 | 25.679 |
| 6/10/2010 04:27:01 | 24.367 | 8/19/2010 05:59:00 | 23.0 | 6/11/2010 02:36:01 | 25.679 |
| 6/10/2010 04:47:01 | 24.367 | 8/19/2010 06:34:00 | 23.0 | 6/11/2010 02:56:01 | 25.679 |
| 6/10/2010 05:07:01 | 24.304 | 8/19/2010 07:09:00 | 23.0 | 6/11/2010 03:16:01 | 25.679 |
| 6/10/2010 05:27:01 | 24.304 | 8/19/2010 07:44:00 | 23.0 | 6/11/2010 03:36:01 | 25.679 |

|                    |        |                    |      |                    |        |
|--------------------|--------|--------------------|------|--------------------|--------|
| 6/10/2010 05:47:01 | 24.304 | 8/19/2010 08:19:00 | 23.0 | 6/11/2010 03:56:01 | 25.679 |
| 6/10/2010 06:07:01 | 24.304 | 8/19/2010 08:54:00 | 23.0 | 6/11/2010 04:16:01 | 25.679 |
| 6/10/2010 06:27:01 | 24.242 | 8/19/2010 09:29:00 | 23.0 | 6/11/2010 04:36:01 | 25.679 |
| 6/10/2010 06:47:01 | 24.242 | 8/19/2010 10:04:00 | 23.0 | 6/11/2010 04:56:01 | 25.679 |
| 6/10/2010 07:07:01 | 24.242 | 8/19/2010 10:39:00 | 23.0 | 6/11/2010 05:16:01 | 25.679 |
| 6/10/2010 07:27:01 | 24.179 | 8/19/2010 11:14:00 | 23.0 | 6/11/2010 05:36:01 | 25.617 |
| 6/10/2010 07:47:01 | 24.179 | 8/19/2010 11:49:00 | 23.0 | 6/11/2010 05:56:01 | 25.617 |
| 6/10/2010 08:07:01 | 24.179 | 8/19/2010 12:24:00 | 23.0 | 6/11/2010 06:16:01 | 25.617 |
| 6/10/2010 08:27:01 | 24.117 | 8/19/2010 12:59:00 | 23.0 | 6/11/2010 06:36:01 | 25.617 |
| 6/10/2010 08:47:01 | 24.117 | 8/19/2010 13:34:00 | 23.0 | 6/11/2010 06:56:01 | 25.617 |
| 6/10/2010 09:07:01 | 24.117 | 8/19/2010 14:09:00 | 23.0 | 6/11/2010 07:16:01 | 25.617 |
| 6/10/2010 09:27:01 | 24.054 | 8/19/2010 14:44:00 | 23.0 | 6/11/2010 07:36:01 | 25.617 |
| 6/10/2010 09:47:01 | 24.054 | 8/19/2010 15:19:00 | 23.0 | 6/11/2010 07:56:01 | 25.554 |
| 6/10/2010 10:07:01 | 24.054 | 8/19/2010 15:54:00 | 23.0 | 6/11/2010 08:16:01 | 25.554 |
| 6/10/2010 10:27:01 | 23.992 | 8/19/2010 16:29:00 | 23.5 | 6/11/2010 08:36:01 | 25.554 |
| 6/10/2010 10:47:01 | 23.992 | 8/19/2010 17:04:00 | 23.5 | 6/11/2010 08:56:01 | 25.554 |
| 6/10/2010 11:07:01 | 23.992 | 8/19/2010 17:39:00 | 23.5 | 6/11/2010 09:16:01 | 25.554 |
| 6/10/2010 11:27:01 | 23.929 | 8/19/2010 18:14:00 | 23.5 | 6/11/2010 09:36:01 | 25.554 |
| 6/10/2010 11:47:01 | 23.929 | 8/19/2010 18:49:00 | 23.5 | 6/11/2010 09:56:01 | 25.492 |
| 6/10/2010 12:07:01 | 23.929 | 8/19/2010 19:24:00 | 23.5 | 6/11/2010 10:16:01 | 25.492 |
| 6/10/2010 12:27:01 | 23.929 | 8/19/2010 19:59:00 | 23.5 | 6/11/2010 10:36:01 | 25.492 |
| 6/10/2010 12:47:01 | 23.929 | 8/19/2010 20:34:00 | 23.5 | 6/11/2010 10:56:01 | 25.492 |
| 6/10/2010 13:07:01 | 23.929 | 8/19/2010 21:09:00 | 23.5 | 6/11/2010 11:16:01 | 25.429 |
| 6/10/2010 13:27:01 | 23.929 | 8/19/2010 21:44:00 | 23.5 | 6/11/2010 11:36:01 | 25.429 |
| 6/10/2010 13:47:01 | 23.929 | 8/19/2010 22:19:00 | 24.0 | 6/11/2010 11:56:01 | 25.429 |
| 6/10/2010 14:07:01 | 23.992 | 8/19/2010 22:54:00 | 24.0 | 6/11/2010 12:16:01 | 25.429 |
| 6/10/2010 14:27:01 | 23.992 | 8/19/2010 23:29:00 | 24.0 | 6/11/2010 12:36:01 | 25.429 |
| 6/10/2010 14:47:01 | 23.992 | 8/20/2010 00:04:00 | 24.0 | 6/11/2010 12:56:01 | 25.429 |
| 6/10/2010 15:07:01 | 24.054 | 8/20/2010 00:39:00 | 24.0 | 6/11/2010 13:16:01 | 25.367 |
| 6/10/2010 15:27:01 | 24.054 | 8/20/2010 01:14:00 | 24.0 | 6/11/2010 13:36:01 | 25.367 |
| 6/10/2010 15:47:01 | 24.117 | 8/20/2010 01:49:00 | 23.5 | 6/11/2010 13:56:01 | 25.367 |
| 6/10/2010 16:07:01 | 24.117 | 8/20/2010 02:24:00 | 23.5 | 6/11/2010 14:16:01 | 25.367 |
| 6/10/2010 16:27:01 | 24.179 | 8/20/2010 02:59:00 | 24.0 | 6/11/2010 14:36:01 | 25.367 |
| 6/10/2010 16:47:01 | 24.242 | 8/20/2010 03:34:00 | 23.5 | 6/11/2010 14:56:01 | 25.367 |
| 6/10/2010 17:07:01 | 24.242 | 8/20/2010 04:09:00 | 23.5 | 6/11/2010 15:16:01 | 25.367 |
| 6/10/2010 17:27:01 | 24.304 | 8/20/2010 04:44:00 | 23.5 | 6/11/2010 15:36:01 | 25.367 |
| 6/10/2010 17:47:01 | 24.367 | 8/20/2010 05:19:00 | 23.5 | 6/11/2010 15:56:01 | 25.367 |
| 6/10/2010 18:07:01 | 24.367 | 8/20/2010 05:54:00 | 23.5 | 6/11/2010 16:16:01 | 25.367 |
| 6/10/2010 18:27:01 | 24.429 | 8/20/2010 06:29:00 | 23.5 | 6/11/2010 16:36:01 | 25.367 |
| 6/10/2010 18:47:01 | 24.429 | 8/20/2010 07:04:00 | 23.5 | 6/11/2010 16:56:01 | 25.367 |
| 6/10/2010 19:07:01 | 24.429 | 8/20/2010 07:39:00 | 23.5 | 6/11/2010 17:16:01 | 25.367 |
| 6/10/2010 19:27:01 | 24.492 | 8/20/2010 08:14:00 | 23.5 | 6/11/2010 17:36:01 | 25.367 |
| 6/10/2010 19:47:01 | 24.492 | 8/20/2010 08:49:00 | 23.5 | 6/11/2010 17:56:01 | 25.367 |
| 6/10/2010 20:07:01 | 24.492 | 8/20/2010 09:24:00 | 23.5 | 6/11/2010 18:16:01 | 25.429 |
| 6/10/2010 20:27:01 | 24.554 | 8/20/2010 09:59:00 | 23.0 | 6/11/2010 18:36:01 | 25.429 |
| 6/10/2010 20:47:01 | 24.554 | 8/20/2010 10:34:00 | 23.0 | 6/11/2010 18:56:01 | 25.429 |
| 6/10/2010 21:07:01 | 24.554 | 8/20/2010 11:09:00 | 23.0 | 6/11/2010 19:16:01 | 25.429 |
| 6/10/2010 21:27:01 | 24.554 | 8/20/2010 11:44:00 | 23.0 | 6/11/2010 19:36:01 | 25.429 |
| 6/10/2010 21:47:01 | 24.554 | 8/20/2010 12:19:00 | 23.0 | 6/11/2010 19:56:01 | 25.429 |
| 6/10/2010 22:07:01 | 24.554 | 8/20/2010 12:54:00 | 23.0 | 6/11/2010 20:16:01 | 25.492 |

|                    |        |                    |      |                    |        |
|--------------------|--------|--------------------|------|--------------------|--------|
| 6/10/2010 22:27:01 | 24.554 | 8/20/2010 13:29:00 | 23.0 | 6/11/2010 20:36:01 | 25.492 |
| 6/10/2010 22:47:01 | 24.554 | 8/20/2010 14:04:00 | 23.5 | 6/11/2010 20:56:01 | 25.492 |
| 6/10/2010 23:07:01 | 24.554 | 8/20/2010 14:39:00 | 23.5 | 6/11/2010 21:16:01 | 25.492 |
| 6/10/2010 23:27:01 | 24.554 | 8/20/2010 15:14:00 | 23.5 | 6/11/2010 21:36:01 | 25.554 |
| 6/10/2010 23:47:01 | 24.492 | 8/20/2010 15:49:00 | 23.5 | 6/11/2010 21:56:01 | 25.554 |
| 6/11/2010 00:07:01 | 24.492 | 8/20/2010 16:24:00 | 23.5 | 6/11/2010 22:16:01 | 25.554 |
| 6/11/2010 00:27:01 | 24.492 | 8/20/2010 16:59:00 | 23.5 | 6/11/2010 22:36:01 | 25.554 |
| 6/11/2010 00:47:01 | 24.492 | 8/20/2010 17:34:00 | 23.5 | 6/11/2010 22:56:01 | 25.554 |
| 6/11/2010 01:07:01 | 24.492 | 8/20/2010 18:09:00 | 23.5 | 6/11/2010 23:16:01 | 25.554 |
| 6/11/2010 01:27:01 | 24.492 | 8/20/2010 18:44:00 | 23.5 | 6/11/2010 23:36:01 | 25.554 |
| 6/11/2010 01:47:01 | 24.429 | 8/20/2010 19:19:00 | 23.5 | 6/11/2010 23:56:01 | 25.617 |
| 6/11/2010 02:07:01 | 24.429 | 8/20/2010 19:54:00 | 23.5 | 6/12/2010 00:16:01 | 25.617 |
| 6/11/2010 02:27:01 | 24.429 | 8/20/2010 20:29:00 | 24.0 | 6/12/2010 00:36:01 | 25.617 |
| 6/11/2010 02:47:01 | 24.429 | 8/20/2010 21:04:00 | 24.0 | 6/12/2010 00:56:01 | 25.617 |
| 6/11/2010 03:07:01 | 24.429 | 8/20/2010 21:39:00 | 24.0 | 6/12/2010 01:16:01 | 25.617 |
| 6/11/2010 03:27:01 | 24.429 | 8/20/2010 22:14:00 | 24.0 | 6/12/2010 01:36:01 | 25.617 |
| 6/11/2010 03:47:01 | 24.367 | 8/20/2010 22:49:00 | 24.0 | 6/12/2010 01:56:01 | 25.617 |
| 6/11/2010 04:07:01 | 24.367 | 8/20/2010 23:24:00 | 24.0 | 6/12/2010 02:16:01 | 25.617 |
| 6/11/2010 04:27:01 | 24.367 | 8/20/2010 23:59:00 | 24.0 | 6/12/2010 02:36:01 | 25.617 |
| 6/11/2010 04:47:01 | 24.367 | 8/21/2010 00:34:00 | 24.0 | 6/12/2010 02:56:01 | 25.617 |
| 6/11/2010 05:07:01 | 24.304 | 8/21/2010 01:09:00 | 24.0 | 6/12/2010 03:16:01 | 25.617 |
| 6/11/2010 05:27:01 | 24.304 | 8/21/2010 01:44:00 | 23.5 | 6/12/2010 03:36:01 | 25.617 |
| 6/11/2010 05:47:01 | 24.304 | 8/21/2010 02:19:00 | 23.5 | 6/12/2010 03:56:01 | 25.617 |
| 6/11/2010 06:07:01 | 24.304 | 8/21/2010 02:54:00 | 23.5 | 6/12/2010 04:16:01 | 25.617 |
| 6/11/2010 06:27:01 | 24.242 | 8/21/2010 03:29:00 | 23.5 | 6/12/2010 04:36:01 | 25.617 |
| 6/11/2010 06:47:01 | 24.242 | 8/21/2010 04:04:00 | 23.5 | 6/12/2010 04:56:01 | 25.617 |
| 6/11/2010 07:07:01 | 24.242 | 8/21/2010 04:39:00 | 23.5 | 6/12/2010 05:16:01 | 25.617 |
| 6/11/2010 07:27:01 | 24.242 | 8/21/2010 05:14:00 | 23.5 | 6/12/2010 05:36:01 | 25.554 |
| 6/11/2010 07:47:01 | 24.179 | 8/21/2010 05:49:00 | 23.5 | 6/12/2010 05:56:01 | 25.554 |
| 6/11/2010 08:07:01 | 24.179 | 8/21/2010 06:24:00 | 23.5 | 6/12/2010 06:16:01 | 25.554 |
| 6/11/2010 08:27:01 | 24.179 | 8/21/2010 06:59:00 | 23.5 | 6/12/2010 06:36:01 | 25.554 |
| 6/11/2010 08:47:01 | 24.117 | 8/21/2010 07:34:00 | 23.5 | 6/12/2010 06:56:01 | 25.554 |
| 6/11/2010 09:07:01 | 24.117 | 8/21/2010 08:09:00 | 23.5 | 6/12/2010 07:16:01 | 25.554 |
| 6/11/2010 09:27:01 | 24.117 | 8/21/2010 08:44:00 | 23.5 | 6/12/2010 07:36:01 | 25.492 |
| 6/11/2010 09:47:01 | 24.054 | 8/21/2010 09:19:00 | 23.5 | 6/12/2010 07:56:01 | 25.492 |
| 6/11/2010 10:07:01 | 24.054 | 8/21/2010 09:54:00 | 23.5 | 6/12/2010 08:16:01 | 25.492 |
| 6/11/2010 10:27:01 | 24.054 | 8/21/2010 10:29:00 | 23.5 | 6/12/2010 08:36:01 | 25.492 |
| 6/11/2010 10:47:01 | 23.992 | 8/21/2010 11:04:00 | 23.5 | 6/12/2010 08:56:01 | 25.492 |
| 6/11/2010 11:07:01 | 23.992 | 8/21/2010 11:39:00 | 23.5 | 6/12/2010 09:16:01 | 25.429 |
| 6/11/2010 11:27:01 | 23.992 | 8/21/2010 12:14:00 | 23.5 | 6/12/2010 09:36:01 | 25.429 |
| 6/11/2010 11:47:01 | 23.992 | 8/21/2010 12:49:00 | 23.5 | 6/12/2010 09:56:01 | 25.429 |
| 6/11/2010 12:07:01 | 23.929 | 8/21/2010 13:24:00 | 23.5 | 6/12/2010 10:16:01 | 25.429 |
| 6/11/2010 12:27:01 | 23.929 | 8/21/2010 13:59:00 | 23.5 | 6/12/2010 10:36:01 | 25.429 |
| 6/11/2010 12:47:01 | 23.929 | 8/21/2010 14:34:00 | 23.5 | 6/12/2010 10:56:01 | 25.367 |
| 6/11/2010 13:07:01 | 23.929 | 8/21/2010 15:09:00 | 23.5 | 6/12/2010 11:16:01 | 25.367 |
| 6/11/2010 13:27:01 | 23.929 | 8/21/2010 15:44:00 | 23.5 | 6/12/2010 11:36:01 | 25.367 |
| 6/11/2010 13:47:01 | 23.992 | 8/21/2010 16:19:00 | 23.5 | 6/12/2010 11:56:01 | 25.367 |
| 6/11/2010 14:07:01 | 23.992 | 8/21/2010 16:54:00 | 23.5 | 6/12/2010 12:16:01 | 25.304 |
| 6/11/2010 14:27:01 | 23.992 | 8/21/2010 17:29:00 | 23.5 | 6/12/2010 12:36:01 | 25.304 |
| 6/11/2010 14:47:01 | 24.054 | 8/21/2010 18:04:00 | 24.0 | 6/12/2010 12:56:01 | 25.304 |

|                    |        |                    |      |                    |        |
|--------------------|--------|--------------------|------|--------------------|--------|
| 6/11/2010 15:07:01 | 24.054 | 8/21/2010 18:39:00 | 24.0 | 6/12/2010 13:16:01 | 25.304 |
| 6/11/2010 15:27:01 | 24.054 | 8/21/2010 19:14:00 | 24.0 | 6/12/2010 13:36:01 | 25.304 |
| 6/11/2010 15:47:01 | 24.117 | 8/21/2010 19:49:00 | 24.0 | 6/12/2010 13:56:01 | 25.242 |
| 6/11/2010 16:07:01 | 24.179 | 8/21/2010 20:24:00 | 24.0 | 6/12/2010 14:16:01 | 25.242 |
| 6/11/2010 16:27:01 | 24.179 | 8/21/2010 20:59:00 | 24.0 | 6/12/2010 14:36:01 | 25.242 |
| 6/11/2010 16:47:01 | 24.242 | 8/21/2010 21:34:00 | 24.0 | 6/12/2010 14:56:01 | 25.242 |
| 6/11/2010 17:07:01 | 24.304 | 8/21/2010 22:09:00 | 24.0 | 6/12/2010 15:16:01 | 25.242 |
| 6/11/2010 17:27:01 | 24.304 | 8/21/2010 22:44:00 | 24.0 | 6/12/2010 15:36:01 | 25.242 |
| 6/11/2010 17:47:01 | 24.367 | 8/21/2010 23:19:00 | 24.0 | 6/12/2010 15:56:01 | 25.242 |
| 6/11/2010 18:07:01 | 24.367 | 8/21/2010 23:54:00 | 24.0 | 6/12/2010 16:16:01 | 25.242 |
| 6/11/2010 18:27:01 | 24.429 | 8/22/2010 00:29:00 | 24.0 | 6/12/2010 16:36:01 | 25.242 |
| 6/11/2010 18:47:01 | 24.429 | 8/22/2010 01:04:00 | 24.0 | 6/12/2010 16:56:01 | 25.242 |
| 6/11/2010 19:07:01 | 24.492 | 8/22/2010 01:39:00 | 24.0 | 6/12/2010 17:16:01 | 25.242 |
| 6/11/2010 19:27:01 | 24.492 | 8/22/2010 02:14:00 | 24.0 | 6/12/2010 17:36:01 | 25.242 |
| 6/11/2010 19:47:01 | 24.492 | 8/22/2010 02:49:00 | 24.0 | 6/12/2010 17:56:01 | 25.304 |
| 6/11/2010 20:07:01 | 24.554 | 8/22/2010 03:24:00 | 24.0 | 6/12/2010 18:16:01 | 25.304 |
| 6/11/2010 20:27:01 | 24.554 | 8/22/2010 03:59:00 | 24.0 | 6/12/2010 18:36:01 | 25.304 |
| 6/11/2010 20:47:01 | 24.554 | 8/22/2010 04:34:00 | 24.0 | 6/12/2010 18:56:01 | 25.304 |
| 6/11/2010 21:07:01 | 24.554 | 8/22/2010 05:09:00 | 24.0 | 6/12/2010 19:16:01 | 25.304 |
| 6/11/2010 21:27:01 | 24.554 | 8/22/2010 05:44:00 | 24.0 | 6/12/2010 19:36:01 | 25.304 |
| 6/11/2010 21:47:01 | 24.554 | 8/22/2010 06:19:00 | 24.0 | 6/12/2010 19:56:01 | 25.304 |
| 6/11/2010 22:07:01 | 24.554 | 8/22/2010 06:54:00 | 23.5 | 6/12/2010 20:16:01 | 25.367 |
| 6/11/2010 22:27:01 | 24.554 | 8/22/2010 07:29:00 | 23.5 | 6/12/2010 20:36:01 | 25.367 |
| 6/11/2010 22:47:01 | 24.554 | 8/22/2010 08:04:00 | 23.5 | 6/12/2010 20:56:01 | 25.367 |
| 6/11/2010 23:07:01 | 24.554 | 8/22/2010 08:39:00 | 23.5 | 6/12/2010 21:16:01 | 25.367 |
| 6/11/2010 23:27:01 | 24.554 | 8/22/2010 09:14:00 | 23.5 | 6/12/2010 21:36:01 | 25.429 |
| 6/11/2010 23:47:01 | 24.554 | 8/22/2010 09:49:00 | 23.5 | 6/12/2010 21:56:01 | 25.429 |
| 6/12/2010 00:07:01 | 24.492 | 8/22/2010 10:24:00 | 23.5 | 6/12/2010 22:16:01 | 25.429 |
| 6/12/2010 00:27:01 | 24.492 | 8/22/2010 10:59:00 | 23.5 | 6/12/2010 22:36:01 | 25.429 |
| 6/12/2010 00:47:01 | 24.492 | 8/22/2010 11:34:00 | 23.5 | 6/12/2010 22:56:01 | 25.429 |
| 6/12/2010 01:07:01 | 24.492 | 8/22/2010 12:09:00 | 23.5 | 6/12/2010 23:16:01 | 25.429 |
| 6/12/2010 01:27:01 | 24.429 | 8/22/2010 12:44:00 | 23.5 | 6/12/2010 23:36:01 | 25.492 |
| 6/12/2010 01:47:01 | 24.429 | 8/22/2010 13:19:00 | 23.5 | 6/12/2010 23:56:01 | 25.492 |
| 6/12/2010 02:07:01 | 24.429 | 8/22/2010 13:54:00 | 23.5 | 6/13/2010 00:16:01 | 25.492 |
| 6/12/2010 02:27:01 | 24.429 | 8/22/2010 14:29:00 | 23.5 | 6/13/2010 00:36:01 | 25.492 |
| 6/12/2010 02:47:01 | 24.367 | 8/22/2010 15:04:00 | 23.5 | 6/13/2010 00:56:01 | 25.492 |
| 6/12/2010 03:07:01 | 24.367 | 8/22/2010 15:39:00 | 23.5 | 6/13/2010 01:16:01 | 25.492 |
| 6/12/2010 03:27:01 | 24.367 | 8/22/2010 16:14:00 | 23.5 | 6/13/2010 01:36:01 | 25.492 |
| 6/12/2010 03:47:01 | 24.304 | 8/22/2010 16:49:00 | 23.5 | 6/13/2010 01:56:01 | 25.492 |
| 6/12/2010 04:07:01 | 24.304 | 8/22/2010 17:24:00 | 24.0 | 6/13/2010 02:16:01 | 25.492 |
| 6/12/2010 04:27:01 | 24.304 | 8/22/2010 17:59:00 | 24.0 | 6/13/2010 02:36:01 | 25.492 |
| 6/12/2010 04:47:01 | 24.304 | 8/22/2010 18:34:00 | 24.0 | 6/13/2010 02:56:01 | 25.492 |
| 6/12/2010 05:07:01 | 24.242 | 8/22/2010 19:09:00 | 24.0 | 6/13/2010 03:16:01 | 25.492 |
| 6/12/2010 05:27:01 | 24.242 | 8/22/2010 19:44:00 | 24.0 | 6/13/2010 03:36:01 | 25.492 |
| 6/12/2010 05:47:01 | 24.242 | 8/22/2010 20:19:00 | 24.0 | 6/13/2010 03:56:01 | 25.492 |
| 6/12/2010 06:07:01 | 24.179 | 8/22/2010 20:54:00 | 24.0 | 6/13/2010 04:16:01 | 25.492 |
| 6/12/2010 06:27:01 | 24.179 | 8/22/2010 21:29:00 | 24.0 | 6/13/2010 04:36:01 | 25.492 |
| 6/12/2010 06:47:01 | 24.179 | 8/22/2010 22:04:00 | 24.0 | 6/13/2010 04:56:01 | 25.492 |
| 6/12/2010 07:07:01 | 24.179 | 8/22/2010 22:39:00 | 24.0 | 6/13/2010 05:16:01 | 25.492 |
| 6/12/2010 07:27:01 | 24.117 | 8/22/2010 23:14:00 | 24.0 | 6/13/2010 05:36:01 | 25.492 |

|                    |        |                    |      |                    |        |
|--------------------|--------|--------------------|------|--------------------|--------|
| 6/12/2010 07:47:01 | 24.117 | 8/22/2010 23:49:00 | 24.0 | 6/13/2010 05:56:01 | 25.492 |
| 6/12/2010 08:07:01 | 24.117 | 8/23/2010 00:24:00 | 24.0 | 6/13/2010 06:16:01 | 25.492 |
| 6/12/2010 08:27:01 | 24.054 | 8/23/2010 00:59:00 | 24.0 | 6/13/2010 06:36:01 | 25.492 |
| 6/12/2010 08:47:01 | 24.054 | 8/23/2010 01:34:00 | 24.0 | 6/13/2010 06:56:01 | 25.429 |
| 6/12/2010 09:07:01 | 24.054 | 8/23/2010 02:09:00 | 24.0 | 6/13/2010 07:16:01 | 25.429 |
| 6/12/2010 09:27:01 | 23.992 | 8/23/2010 02:44:00 | 24.0 | 6/13/2010 07:36:01 | 25.429 |
| 6/12/2010 09:47:01 | 23.992 | 8/23/2010 03:19:00 | 24.0 | 6/13/2010 07:56:01 | 25.429 |
| 6/12/2010 10:07:01 | 23.992 | 8/23/2010 03:54:00 | 24.0 | 6/13/2010 08:16:01 | 25.429 |
| 6/12/2010 10:27:01 | 23.929 | 8/23/2010 04:29:00 | 24.0 | 6/13/2010 08:36:01 | 25.429 |
| 6/12/2010 10:47:01 | 23.929 | 8/23/2010 05:04:00 | 24.0 | 6/13/2010 08:56:01 | 25.367 |
| 6/12/2010 11:07:01 | 23.929 | 8/23/2010 05:39:00 | 23.5 | 6/13/2010 09:16:01 | 25.367 |
| 6/12/2010 11:27:01 | 23.867 | 8/23/2010 06:14:00 | 23.5 | 6/13/2010 09:36:01 | 25.367 |
| 6/12/2010 11:47:01 | 23.867 | 8/23/2010 06:49:00 | 23.5 | 6/13/2010 09:56:01 | 25.367 |
| 6/12/2010 12:07:01 | 23.867 | 8/23/2010 07:24:00 | 23.5 | 6/13/2010 10:16:01 | 25.367 |
| 6/12/2010 12:27:01 | 23.867 | 8/23/2010 07:59:00 | 23.5 | 6/13/2010 10:36:01 | 25.304 |
| 6/12/2010 12:47:01 | 23.867 | 8/23/2010 08:34:00 | 23.5 | 6/13/2010 10:56:01 | 25.304 |
| 6/12/2010 13:07:01 | 23.867 | 8/23/2010 09:09:00 | 23.5 | 6/13/2010 11:16:01 | 25.304 |
| 6/12/2010 13:27:01 | 23.867 | 8/23/2010 09:44:00 | 23.5 | 6/13/2010 11:36:01 | 25.304 |
| 6/12/2010 13:47:01 | 23.867 | 8/23/2010 10:19:00 | 23.5 | 6/13/2010 11:56:01 | 25.242 |
| 6/12/2010 14:07:01 | 23.929 | 8/23/2010 10:54:00 | 23.5 | 6/13/2010 12:16:01 | 25.242 |
| 6/12/2010 14:27:01 | 23.929 | 8/23/2010 11:29:00 | 23.5 | 6/13/2010 12:36:01 | 25.242 |
| 6/12/2010 14:47:01 | 23.929 | 8/23/2010 12:04:00 | 23.5 | 6/13/2010 12:56:01 | 25.242 |
| 6/12/2010 15:07:01 | 23.992 | 8/23/2010 12:39:00 | 23.5 | 6/13/2010 13:16:01 | 25.242 |
| 6/12/2010 15:27:01 | 23.992 | 8/23/2010 13:14:00 | 23.5 | 6/13/2010 13:36:01 | 25.179 |
| 6/12/2010 15:47:01 | 24.054 | 8/23/2010 13:49:00 | 23.5 | 6/13/2010 13:56:01 | 25.179 |
| 6/12/2010 16:07:01 | 24.054 | 8/23/2010 14:24:00 | 23.5 | 6/13/2010 14:16:01 | 25.179 |
| 6/12/2010 16:27:01 | 24.117 | 8/23/2010 14:59:00 | 23.5 | 6/13/2010 14:36:01 | 25.179 |
| 6/12/2010 16:47:01 | 24.179 | 8/23/2010 15:34:00 | 23.5 | 6/13/2010 14:56:01 | 25.179 |
| 6/12/2010 17:07:01 | 24.179 | 8/23/2010 16:09:00 | 23.5 | 6/13/2010 15:16:01 | 25.179 |
| 6/12/2010 17:27:01 | 24.242 | 8/23/2010 16:44:00 | 23.5 | 6/13/2010 15:36:01 | 25.179 |
| 6/12/2010 17:47:01 | 24.242 | 8/23/2010 17:19:00 | 24.0 | 6/13/2010 15:56:01 | 25.179 |
| 6/12/2010 18:07:01 | 24.304 | 8/23/2010 17:54:00 | 24.0 | 6/13/2010 16:16:01 | 25.179 |
| 6/12/2010 18:27:01 | 24.367 | 8/23/2010 18:29:00 | 24.0 | 6/13/2010 16:36:01 | 25.179 |
| 6/12/2010 18:47:01 | 24.367 | 8/23/2010 19:04:00 | 24.0 | 6/13/2010 16:56:01 | 25.179 |
| 6/12/2010 19:07:01 | 24.429 | 8/23/2010 19:39:00 | 24.0 | 6/13/2010 17:16:01 | 25.179 |
| 6/12/2010 19:27:01 | 24.429 | 8/23/2010 20:14:00 | 24.0 | 6/13/2010 17:36:01 | 25.179 |
| 6/12/2010 19:47:01 | 24.429 | 8/23/2010 20:49:00 | 24.0 | 6/13/2010 17:56:01 | 25.179 |
| 6/12/2010 20:07:01 | 24.492 | 8/23/2010 21:24:00 | 24.0 | 6/13/2010 18:16:01 | 25.179 |
| 6/12/2010 20:27:01 | 24.492 | 8/23/2010 21:59:00 | 24.0 | 6/13/2010 18:36:01 | 25.242 |
| 6/12/2010 20:47:01 | 24.492 | 8/23/2010 22:34:00 | 24.0 | 6/13/2010 18:56:01 | 25.242 |
| 6/12/2010 21:07:01 | 24.492 | 8/23/2010 23:09:00 | 24.0 | 6/13/2010 19:16:01 | 25.242 |
| 6/12/2010 21:27:01 | 24.492 | 8/23/2010 23:44:00 | 24.0 | 6/13/2010 19:36:01 | 25.242 |
| 6/12/2010 21:47:01 | 24.492 | 8/24/2010 00:19:00 | 24.0 | 6/13/2010 19:56:01 | 25.242 |
| 6/12/2010 22:07:01 | 24.492 | 8/24/2010 00:54:00 | 24.0 | 6/13/2010 20:16:01 | 25.242 |
| 6/12/2010 22:27:01 | 24.492 | 8/24/2010 01:29:00 | 24.0 | 6/13/2010 20:36:01 | 25.242 |
| 6/12/2010 22:47:01 | 24.492 | 8/24/2010 02:04:00 | 24.0 | 6/13/2010 20:56:01 | 25.304 |
| 6/12/2010 23:07:01 | 24.492 | 8/24/2010 02:39:00 | 24.0 | 6/13/2010 21:16:01 | 25.304 |
| 6/12/2010 23:27:01 | 24.492 | 8/24/2010 03:14:00 | 24.0 | 6/13/2010 21:36:01 | 25.304 |
| 6/12/2010 23:47:01 | 24.492 | 8/24/2010 03:49:00 | 24.0 | 6/13/2010 21:56:01 | 25.304 |
| 6/13/2010 00:07:01 | 24.492 | 8/24/2010 04:24:00 | 24.0 | 6/13/2010 22:16:01 | 25.304 |

|                    |        |                    |      |                    |        |
|--------------------|--------|--------------------|------|--------------------|--------|
| 6/13/2010 00:27:01 | 24.492 | 8/24/2010 04:59:00 | 24.0 | 6/13/2010 22:36:01 | 25.367 |
| 6/13/2010 00:47:01 | 24.492 | 8/24/2010 05:34:00 | 24.0 | 6/13/2010 22:56:01 | 25.367 |
| 6/13/2010 01:07:01 | 24.429 | 8/24/2010 06:09:00 | 24.0 | 6/13/2010 23:16:01 | 25.367 |
| 6/13/2010 01:27:01 | 24.429 | 8/24/2010 06:44:00 | 24.0 | 6/13/2010 23:36:01 | 25.367 |
| 6/13/2010 01:47:01 | 24.429 | 8/24/2010 07:19:00 | 23.5 | 6/13/2010 23:56:01 | 25.367 |
| 6/13/2010 02:07:01 | 24.429 | 8/24/2010 07:54:00 | 23.5 | 6/14/2010 00:16:01 | 25.367 |
| 6/13/2010 02:27:01 | 24.429 | 8/24/2010 08:29:00 | 23.5 | 6/14/2010 00:36:01 | 25.367 |
| 6/13/2010 02:47:01 | 24.429 | 8/24/2010 09:04:00 | 23.5 | 6/14/2010 00:56:01 | 25.367 |
| 6/13/2010 03:07:01 | 24.367 | 8/24/2010 09:39:00 | 23.5 | 6/14/2010 01:16:01 | 25.429 |
| 6/13/2010 03:27:01 | 24.367 | 8/24/2010 10:14:00 | 23.5 | 6/14/2010 01:36:01 | 25.429 |
| 6/13/2010 03:47:01 | 24.367 | 8/24/2010 10:49:00 | 23.5 | 6/14/2010 01:56:01 | 25.429 |
| 6/13/2010 04:07:01 | 24.367 | 8/24/2010 11:24:00 | 23.5 | 6/14/2010 02:16:01 | 25.429 |
| 6/13/2010 04:27:01 | 24.304 | 8/24/2010 11:59:00 | 23.5 | 6/14/2010 02:36:01 | 25.429 |
| 6/13/2010 04:47:01 | 24.304 | 8/24/2010 12:34:00 | 23.5 | 6/14/2010 02:56:01 | 25.429 |
| 6/13/2010 05:07:01 | 24.304 | 8/24/2010 13:09:00 | 24.0 | 6/14/2010 03:16:01 | 25.429 |
| 6/13/2010 05:27:01 | 24.304 | 8/24/2010 13:44:00 | 24.0 | 6/14/2010 03:36:01 | 25.367 |
| 6/13/2010 05:47:01 | 24.242 | 8/24/2010 14:19:00 | 24.0 | 6/14/2010 03:56:01 | 25.429 |
| 6/13/2010 06:07:01 | 24.242 | 8/24/2010 14:54:00 | 24.0 | 6/14/2010 04:16:01 | 25.367 |
| 6/13/2010 06:27:01 | 24.242 | 8/24/2010 15:29:00 | 24.0 | 6/14/2010 04:36:01 | 25.367 |
| 6/13/2010 06:47:01 | 24.179 | 8/24/2010 16:04:00 | 24.0 | 6/14/2010 04:56:01 | 25.367 |
| 6/13/2010 07:07:01 | 24.179 | 8/24/2010 16:39:00 | 24.0 | 6/14/2010 05:16:01 | 25.367 |
| 6/13/2010 07:27:01 | 24.179 | 8/24/2010 17:14:00 | 24.0 | 6/14/2010 05:36:01 | 25.367 |
| 6/13/2010 07:47:01 | 24.117 | 8/24/2010 17:49:00 | 24.0 | 6/14/2010 05:56:01 | 25.367 |
| 6/13/2010 08:07:01 | 24.117 | 8/24/2010 18:24:00 | 24.0 | 6/14/2010 06:16:01 | 25.367 |
| 6/13/2010 08:27:01 | 24.054 | 8/24/2010 18:59:00 | 24.0 | 6/14/2010 06:36:01 | 25.367 |
| 6/13/2010 08:47:01 | 24.054 | 8/24/2010 19:34:00 | 24.0 | 6/14/2010 06:56:01 | 25.367 |
| 6/13/2010 09:07:01 | 24.054 | 8/24/2010 20:09:00 | 24.5 | 6/14/2010 07:16:01 | 25.367 |
| 6/13/2010 09:27:01 | 23.992 | 8/24/2010 20:44:00 | 24.5 | 6/14/2010 07:36:01 | 25.304 |
| 6/13/2010 09:47:01 | 23.992 | 8/24/2010 21:19:00 | 24.0 | 6/14/2010 07:56:01 | 25.304 |
| 6/13/2010 10:07:01 | 23.929 | 8/24/2010 21:54:00 | 24.5 | 6/14/2010 08:16:01 | 25.304 |
| 6/13/2010 10:27:01 | 23.929 | 8/24/2010 22:29:00 | 24.0 | 6/14/2010 08:36:01 | 25.304 |
| 6/13/2010 10:47:01 | 23.929 | 8/24/2010 23:04:00 | 24.0 | 6/14/2010 08:56:01 | 25.304 |
| 6/13/2010 11:07:01 | 23.867 | 8/24/2010 23:39:00 | 24.0 | 6/14/2010 09:16:01 | 25.242 |
| 6/13/2010 11:27:01 | 23.867 | 8/25/2010 00:14:00 | 24.0 | 6/14/2010 09:36:01 | 25.242 |
| 6/13/2010 11:47:01 | 23.867 | 8/25/2010 00:49:00 | 24.0 | 6/14/2010 09:56:01 | 25.242 |
| 6/13/2010 12:07:01 | 23.867 | 8/25/2010 01:24:00 | 24.0 | 6/14/2010 10:16:01 | 25.242 |
| 6/13/2010 12:27:01 | 23.804 | 8/25/2010 01:59:00 | 24.0 | 6/14/2010 10:36:01 | 25.179 |
| 6/13/2010 12:47:01 | 23.804 | 8/25/2010 02:34:00 | 24.0 | 6/14/2010 10:56:01 | 25.179 |
| 6/13/2010 13:07:01 | 23.804 | 8/25/2010 03:09:00 | 24.0 | 6/14/2010 11:16:01 | 25.179 |
| 6/13/2010 13:27:01 | 23.804 | 8/25/2010 03:44:00 | 24.0 | 6/14/2010 11:36:01 | 25.179 |
| 6/13/2010 13:47:01 | 23.867 | 8/25/2010 04:19:00 | 24.0 | 6/14/2010 11:56:01 | 25.179 |
| 6/13/2010 14:07:01 | 23.867 | 8/25/2010 04:54:00 | 23.5 | 6/14/2010 12:16:01 | 25.117 |
| 6/13/2010 14:27:01 | 23.867 | 8/25/2010 05:29:00 | 23.5 | 6/14/2010 12:36:01 | 25.117 |
| 6/13/2010 14:47:01 | 23.867 | 8/25/2010 06:04:00 | 23.5 | 6/14/2010 12:56:01 | 25.117 |
| 6/13/2010 15:07:01 | 23.929 | 8/25/2010 06:39:00 | 23.5 | 6/14/2010 13:16:01 | 25.117 |
| 6/13/2010 15:27:01 | 23.929 | 8/25/2010 07:14:00 | 23.5 | 6/14/2010 13:36:01 | 25.054 |
| 6/13/2010 15:47:01 | 23.992 | 8/25/2010 07:49:00 | 23.5 | 6/14/2010 13:56:01 | 25.054 |
| 6/13/2010 16:07:01 | 23.992 | 8/25/2010 08:24:00 | 23.5 | 6/14/2010 14:16:01 | 25.054 |
| 6/13/2010 16:27:01 | 24.054 | 8/25/2010 08:59:00 | 23.5 | 6/14/2010 14:36:01 | 25.054 |
| 6/13/2010 16:47:01 | 24.117 | 8/25/2010 09:34:00 | 23.5 | 6/14/2010 14:56:01 | 25.054 |



|                    |        |                    |      |                    |        |
|--------------------|--------|--------------------|------|--------------------|--------|
| 6/13/2010 17:07:01 | 24.117 | 8/25/2010 10:09:00 | 23.0 | 6/14/2010 15:16:01 | 25.054 |
| 6/13/2010 17:27:01 | 24.179 | 8/25/2010 10:44:00 | 23.0 | 6/14/2010 15:36:01 | 25.054 |
| 6/13/2010 17:47:01 | 24.179 | 8/25/2010 11:19:00 | 23.0 | 6/14/2010 15:56:01 | 25.054 |
| 6/13/2010 18:07:01 | 24.242 | 8/25/2010 11:54:00 | 23.0 | 6/14/2010 16:16:01 | 25.054 |
| 6/13/2010 18:27:01 | 24.242 | 8/25/2010 12:29:00 | 23.0 | 6/14/2010 16:36:01 | 25.054 |
| 6/13/2010 18:47:01 | 24.304 | 8/25/2010 13:04:00 | 23.5 | 6/14/2010 16:56:01 | 25.054 |
| 6/13/2010 19:07:01 | 24.304 | 8/25/2010 13:39:00 | 23.5 | 6/14/2010 17:16:01 | 25.054 |
| 6/13/2010 19:27:01 | 24.304 | 8/25/2010 14:14:00 | 23.5 | 6/14/2010 17:36:01 | 25.054 |
| 6/13/2010 19:47:01 | 24.367 | 8/25/2010 14:49:00 | 23.5 | 6/14/2010 17:56:01 | 25.054 |
| 6/13/2010 20:07:01 | 24.367 | 8/25/2010 15:24:00 | 23.5 | 6/14/2010 18:16:01 | 25.054 |
| 6/13/2010 20:27:01 | 24.367 | 8/25/2010 15:59:00 | 23.5 | 6/14/2010 18:36:01 | 25.054 |
| 6/13/2010 20:47:01 | 24.367 | 8/25/2010 16:34:00 | 23.5 | 6/14/2010 18:56:01 | 25.054 |
| 6/13/2010 21:07:01 | 24.429 | 8/25/2010 17:09:00 | 23.5 | 6/14/2010 19:16:01 | 25.117 |
| 6/13/2010 21:27:01 | 24.429 | 8/25/2010 17:44:00 | 23.5 | 6/14/2010 19:36:01 | 25.117 |
| 6/13/2010 21:47:01 | 24.429 | 8/25/2010 18:19:00 | 23.5 | 6/14/2010 19:56:01 | 25.117 |
| 6/13/2010 22:07:01 | 24.429 | 8/25/2010 18:54:00 | 24.0 | 6/14/2010 20:16:01 | 25.117 |
| 6/13/2010 22:27:01 | 24.429 | 8/25/2010 19:29:00 | 24.0 | 6/14/2010 20:36:01 | 25.117 |
| 6/13/2010 22:47:01 | 24.429 | 8/25/2010 20:04:00 | 24.0 | 6/14/2010 20:56:01 | 25.117 |
| 6/13/2010 23:07:01 | 24.367 | 8/25/2010 20:39:00 | 24.0 | 6/14/2010 21:16:01 | 25.179 |
| 6/13/2010 23:27:01 | 24.367 | 8/25/2010 21:14:00 | 24.0 | 6/14/2010 21:36:01 | 25.179 |
| 6/13/2010 23:47:01 | 24.367 | 8/25/2010 21:49:00 | 24.0 | 6/14/2010 21:56:01 | 25.179 |
| 6/14/2010 00:07:01 | 24.367 | 8/25/2010 22:24:00 | 24.0 | 6/14/2010 22:16:01 | 25.179 |
| 6/14/2010 00:27:01 | 24.367 | 8/25/2010 22:59:00 | 24.0 | 6/14/2010 22:36:01 | 25.179 |
| 6/14/2010 00:47:01 | 24.304 | 8/25/2010 23:34:00 | 24.0 | 6/14/2010 22:56:01 | 25.179 |
| 6/14/2010 01:07:01 | 24.304 | 8/26/2010 00:09:00 | 24.0 | 6/14/2010 23:16:01 | 25.242 |
| 6/14/2010 01:27:01 | 24.304 | 8/26/2010 00:44:00 | 24.0 | 6/14/2010 23:36:01 | 25.242 |
| 6/14/2010 01:47:01 | 24.304 | 8/26/2010 01:19:00 | 24.0 | 6/14/2010 23:56:01 | 25.242 |
| 6/14/2010 02:07:01 | 24.304 | 8/26/2010 01:54:00 | 24.0 | 6/15/2010 00:16:01 | 25.242 |
| 6/14/2010 02:27:01 | 24.242 | 8/26/2010 02:29:00 | 23.5 | 6/15/2010 00:36:01 | 25.242 |
| 6/14/2010 02:47:01 | 24.242 | 8/26/2010 03:04:00 | 23.5 | 6/15/2010 00:56:01 | 25.242 |
| 6/14/2010 03:07:01 | 24.242 | 8/26/2010 03:39:00 | 23.5 | 6/15/2010 01:16:01 | 25.242 |
| 6/14/2010 03:27:01 | 24.242 | 8/26/2010 04:14:00 | 23.5 | 6/15/2010 01:36:01 | 25.242 |
| 6/14/2010 03:47:01 | 24.242 | 8/26/2010 04:49:00 | 23.5 | 6/15/2010 01:56:01 | 25.242 |
| 6/14/2010 04:07:01 | 24.179 | 8/26/2010 05:24:00 | 23.5 | 6/15/2010 02:16:01 | 25.242 |
| 6/14/2010 04:27:01 | 24.179 | 8/26/2010 05:59:00 | 23.5 | 6/15/2010 02:36:01 | 25.242 |
| 6/14/2010 04:47:01 | 24.179 | 8/26/2010 06:34:00 | 23.5 | 6/15/2010 02:56:01 | 25.304 |
| 6/14/2010 05:07:01 | 24.179 | 8/26/2010 07:09:00 | 23.5 | 6/15/2010 03:16:01 | 25.242 |
| 6/14/2010 05:27:01 | 24.117 | 8/26/2010 07:44:00 | 23.0 | 6/15/2010 03:36:01 | 25.242 |
| 6/14/2010 05:47:01 | 24.117 | 8/26/2010 08:19:00 | 23.0 | 6/15/2010 03:56:01 | 25.304 |
| 6/14/2010 06:07:01 | 24.117 | 8/26/2010 08:54:00 | 23.0 | 6/15/2010 04:16:01 | 25.242 |
| 6/14/2010 06:27:01 | 24.054 | 8/26/2010 09:29:00 | 23.0 | 6/15/2010 04:36:01 | 25.242 |
| 6/14/2010 06:47:01 | 24.054 | 8/26/2010 10:04:00 | 23.0 | 6/15/2010 04:56:01 | 25.242 |
| 6/14/2010 07:07:01 | 24.054 | 8/26/2010 10:39:00 | 23.0 | 6/15/2010 05:16:01 | 25.242 |
| 6/14/2010 07:27:01 | 23.992 | 8/26/2010 11:14:00 | 23.0 | 6/15/2010 05:36:01 | 25.242 |
| 6/14/2010 07:47:01 | 23.992 | 8/26/2010 11:49:00 | 23.0 | 6/15/2010 05:56:01 | 25.242 |
| 6/14/2010 08:07:01 | 23.992 | 8/26/2010 12:24:00 | 23.0 | 6/15/2010 06:16:01 | 25.242 |
| 6/14/2010 08:27:01 | 23.929 | 8/26/2010 12:59:00 | 23.0 | 6/15/2010 06:36:01 | 25.242 |
| 6/14/2010 08:47:01 | 23.929 | 8/26/2010 13:34:00 | 23.0 | 6/15/2010 06:56:01 | 25.242 |
| 6/14/2010 09:07:01 | 23.867 | 8/26/2010 14:09:00 | 23.0 | 6/15/2010 07:16:01 | 25.242 |
| 6/14/2010 09:27:01 | 23.867 | 8/26/2010 14:44:00 | 23.0 | 6/15/2010 07:36:01 | 25.242 |

|                    |        |                    |      |                    |        |
|--------------------|--------|--------------------|------|--------------------|--------|
| 6/14/2010 09:47:01 | 23.867 | 8/26/2010 15:19:00 | 23.0 | 6/15/2010 07:56:01 | 25.242 |
| 6/14/2010 10:07:01 | 23.804 | 8/26/2010 15:54:00 | 23.5 | 6/15/2010 08:16:01 | 25.179 |
| 6/14/2010 10:27:01 | 23.804 | 8/26/2010 16:29:00 | 23.5 | 6/15/2010 08:36:01 | 25.179 |
| 6/14/2010 10:47:01 | 23.742 | 8/26/2010 17:04:00 | 23.5 | 6/15/2010 08:56:01 | 25.179 |
| 6/14/2010 11:07:01 | 23.742 | 8/26/2010 17:39:00 | 23.5 | 6/15/2010 09:16:01 | 25.179 |
| 6/14/2010 11:27:01 | 23.742 | 8/26/2010 18:14:00 | 23.5 | 6/15/2010 09:36:01 | 25.179 |
| 6/14/2010 11:47:01 | 23.679 | 8/26/2010 18:49:00 | 23.5 | 6/15/2010 09:56:01 | 25.117 |
| 6/14/2010 12:07:01 | 23.679 | 8/26/2010 19:24:00 | 23.5 | 6/15/2010 10:16:01 | 25.117 |
| 6/14/2010 12:27:01 | 23.679 | 8/26/2010 19:59:00 | 23.5 | 6/15/2010 10:36:01 | 25.117 |
| 6/14/2010 12:47:01 | 23.679 | 8/26/2010 20:34:00 | 23.5 | 6/15/2010 10:56:01 | 25.117 |
| 6/14/2010 13:07:01 | 23.617 | 8/26/2010 21:09:00 | 23.5 | 6/15/2010 11:16:01 | 25.117 |
| 6/14/2010 13:27:01 | 23.617 | 8/26/2010 21:44:00 | 23.5 | 6/15/2010 11:36:01 | 25.054 |
| 6/14/2010 13:47:01 | 23.679 | 8/26/2010 22:19:00 | 23.5 | 6/15/2010 11:56:01 | 25.054 |
| 6/14/2010 14:07:01 | 23.679 | 8/26/2010 22:54:00 | 23.5 | 6/15/2010 12:16:01 | 25.054 |
| 6/14/2010 14:27:01 | 23.679 | 8/26/2010 23:29:00 | 23.5 | 6/15/2010 12:36:01 | 25.054 |
| 6/14/2010 14:47:01 | 23.679 | 8/27/2010 00:04:00 | 23.5 | 6/15/2010 12:56:01 | 25.054 |
| 6/14/2010 15:07:01 | 23.742 | 8/27/2010 00:39:00 | 23.5 | 6/15/2010 13:16:01 | 24.992 |
| 6/14/2010 15:27:01 | 23.742 | 8/27/2010 01:14:00 | 23.5 | 6/15/2010 13:36:01 | 24.992 |
| 6/14/2010 15:47:01 | 23.804 | 8/27/2010 01:49:00 | 23.5 | 6/15/2010 13:56:01 | 24.992 |
| 6/14/2010 16:07:01 | 23.804 | 8/27/2010 02:24:00 | 23.5 | 6/15/2010 14:16:01 | 24.992 |
| 6/14/2010 16:27:01 | 23.867 | 8/27/2010 02:59:00 | 23.5 | 6/15/2010 14:36:01 | 24.992 |
| 6/14/2010 16:47:01 | 23.867 | 8/27/2010 03:34:00 | 23.5 | 6/15/2010 14:56:01 | 24.992 |
| 6/14/2010 17:07:01 | 23.929 | 8/27/2010 04:09:00 | 23.5 | 6/15/2010 15:16:01 | 24.992 |
| 6/14/2010 17:27:01 | 23.992 | 8/27/2010 04:44:00 | 23.5 | 6/15/2010 15:36:01 | 24.992 |
| 6/14/2010 17:47:01 | 23.992 | 8/27/2010 05:19:00 | 23.5 | 6/15/2010 15:56:01 | 24.992 |
| 6/14/2010 18:07:01 | 24.054 | 8/27/2010 05:54:00 | 23.5 | 6/15/2010 16:16:01 | 24.992 |
| 6/14/2010 18:27:01 | 24.054 | 8/27/2010 06:29:00 | 23.5 | 6/15/2010 16:36:01 | 24.992 |
| 6/14/2010 18:47:01 | 24.117 | 8/27/2010 07:04:00 | 23.0 | 6/15/2010 16:56:01 | 24.992 |
| 6/14/2010 19:07:01 | 24.117 | 8/27/2010 07:39:00 | 23.0 | 6/15/2010 17:16:01 | 24.992 |
| 6/14/2010 19:27:01 | 24.117 | 8/27/2010 08:14:00 | 23.0 | 6/15/2010 17:36:01 | 24.992 |
| 6/14/2010 19:47:01 | 24.179 | 8/27/2010 08:49:00 | 23.0 | 6/15/2010 17:56:01 | 25.054 |
| 6/14/2010 20:07:01 | 24.179 | 8/27/2010 09:24:00 | 23.0 | 6/15/2010 18:16:01 | 25.054 |
| 6/14/2010 20:27:01 | 24.179 | 8/27/2010 09:59:00 | 23.0 | 6/15/2010 18:36:01 | 25.054 |
| 6/14/2010 20:47:01 | 24.179 | 8/27/2010 10:34:00 | 23.0 | 6/15/2010 18:56:01 | 25.054 |
| 6/14/2010 21:07:01 | 24.242 | 8/27/2010 11:09:00 | 23.0 | 6/15/2010 19:16:01 | 25.054 |
| 6/14/2010 21:27:01 | 24.242 | 8/27/2010 11:44:00 | 23.0 | 6/15/2010 19:36:01 | 25.054 |
| 6/14/2010 21:47:01 | 24.242 | 8/27/2010 12:19:00 | 23.0 | 6/15/2010 19:56:01 | 25.117 |
| 6/14/2010 22:07:01 | 24.242 | 8/27/2010 12:54:00 | 23.0 | 6/15/2010 20:16:01 | 25.117 |
| 6/14/2010 22:27:01 | 24.242 | 8/27/2010 13:29:00 | 23.0 | 6/15/2010 20:36:01 | 25.117 |
| 6/14/2010 22:47:01 | 24.242 | 8/27/2010 14:04:00 | 23.0 | 6/15/2010 20:56:01 | 25.117 |
| 6/14/2010 23:07:01 | 24.242 | 8/27/2010 14:39:00 | 23.0 | 6/15/2010 21:16:01 | 25.117 |
| 6/14/2010 23:27:01 | 24.242 | 8/27/2010 15:14:00 | 23.0 | 6/15/2010 21:36:01 | 25.179 |
| 6/14/2010 23:47:01 | 24.242 | 8/27/2010 15:49:00 | 23.0 | 6/15/2010 21:56:01 | 25.179 |
| 6/15/2010 00:07:01 | 24.242 | 8/27/2010 16:24:00 | 23.5 | 6/15/2010 22:16:01 | 25.179 |
| 6/15/2010 00:27:01 | 24.242 | 8/27/2010 16:59:00 | 23.5 | 6/15/2010 22:36:01 | 25.179 |
| 6/15/2010 00:47:01 | 24.242 | 8/27/2010 17:34:00 | 23.5 | 6/15/2010 22:56:01 | 25.179 |
| 6/15/2010 01:07:01 | 24.242 | 8/27/2010 18:09:00 | 23.5 | 6/15/2010 23:16:01 | 25.179 |
| 6/15/2010 01:27:01 | 24.179 | 8/27/2010 18:44:00 | 23.5 | 6/15/2010 23:36:01 | 25.242 |
| 6/15/2010 01:47:01 | 24.179 | 8/27/2010 19:19:00 | 23.5 | 6/15/2010 23:56:01 | 25.242 |
| 6/15/2010 02:07:01 | 24.179 | 8/27/2010 19:54:00 | 23.5 | 6/16/2010 00:16:01 | 25.242 |

|                    |        |                    |      |                    |        |
|--------------------|--------|--------------------|------|--------------------|--------|
| 6/15/2010 02:27:01 | 24.179 | 8/27/2010 20:29:00 | 23.5 | 6/16/2010 00:36:01 | 25.242 |
| 6/15/2010 02:47:01 | 24.179 | 8/27/2010 21:04:00 | 23.5 | 6/16/2010 00:56:01 | 25.242 |
| 6/15/2010 03:07:01 | 24.179 | 8/27/2010 21:39:00 | 23.5 | 6/16/2010 01:16:01 | 25.242 |
| 6/15/2010 03:27:01 | 24.117 | 8/27/2010 22:14:00 | 23.5 | 6/16/2010 01:36:01 | 25.242 |
| 6/15/2010 03:47:01 | 24.117 | 8/27/2010 22:49:00 | 23.5 | 6/16/2010 01:56:01 | 25.242 |
| 6/15/2010 04:07:01 | 24.117 | 8/27/2010 23:24:00 | 23.5 | 6/16/2010 02:16:01 | 25.304 |
| 6/15/2010 04:27:01 | 24.117 | 8/27/2010 23:59:00 | 23.5 | 6/16/2010 02:36:01 | 25.304 |
| 6/15/2010 04:47:01 | 24.054 | 8/28/2010 00:34:00 | 23.5 | 6/16/2010 02:56:01 | 25.304 |
| 6/15/2010 05:07:01 | 24.054 | 8/28/2010 01:09:00 | 23.5 | 6/16/2010 03:16:01 | 25.304 |
| 6/15/2010 05:27:01 | 24.054 | 8/28/2010 01:44:00 | 23.5 | 6/16/2010 03:36:01 | 25.304 |
| 6/15/2010 05:47:01 | 24.054 | 8/28/2010 02:19:00 | 23.5 | 6/16/2010 03:56:01 | 25.304 |
| 6/15/2010 06:07:01 | 23.992 | 8/28/2010 02:54:00 | 23.5 | 6/16/2010 04:16:01 | 25.304 |
| 6/15/2010 06:27:01 | 23.992 | 8/28/2010 03:29:00 | 23.5 | 6/16/2010 04:36:01 | 25.304 |
| 6/15/2010 06:47:01 | 23.992 | 8/28/2010 04:04:00 | 23.5 | 6/16/2010 04:56:01 | 25.304 |
| 6/15/2010 07:07:01 | 23.929 | 8/28/2010 04:39:00 | 23.5 | 6/16/2010 05:16:01 | 25.304 |
| 6/15/2010 07:27:01 | 23.929 | 8/28/2010 05:14:00 | 23.5 | 6/16/2010 05:36:01 | 25.304 |
| 6/15/2010 07:47:01 | 23.929 | 8/28/2010 05:49:00 | 23.5 | 6/16/2010 05:56:01 | 25.304 |
| 6/15/2010 08:07:01 | 23.867 | 8/28/2010 06:24:00 | 23.0 | 6/16/2010 06:16:01 | 25.304 |
| 6/15/2010 08:27:01 | 23.867 | 8/28/2010 06:59:00 | 23.0 | 6/16/2010 06:36:01 | 25.304 |
| 6/15/2010 08:47:01 | 23.804 | 8/28/2010 07:34:00 | 23.0 | 6/16/2010 06:56:01 | 25.304 |
| 6/15/2010 09:07:01 | 23.804 | 8/28/2010 08:09:00 | 23.0 | 6/16/2010 07:16:01 | 25.304 |
| 6/15/2010 09:27:01 | 23.804 | 8/28/2010 08:44:00 | 23.0 | 6/16/2010 07:36:01 | 25.242 |
| 6/15/2010 09:47:01 | 23.804 | 8/28/2010 09:19:00 | 23.0 | 6/16/2010 07:56:01 | 25.242 |
| 6/15/2010 10:07:01 | 23.742 | 8/28/2010 09:54:00 | 23.0 | 6/16/2010 08:16:01 | 25.242 |
| 6/15/2010 10:27:01 | 23.742 | 8/28/2010 10:29:00 | 23.0 | 6/16/2010 08:36:01 | 25.242 |
| 6/15/2010 10:47:01 | 23.679 | 8/28/2010 11:04:00 | 23.0 | 6/16/2010 08:56:01 | 25.242 |
| 6/15/2010 11:07:01 | 23.679 | 8/28/2010 11:39:00 | 23.0 | 6/16/2010 09:16:01 | 25.242 |
| 6/15/2010 11:27:01 | 23.679 | 8/28/2010 12:14:00 | 23.0 | 6/16/2010 09:36:01 | 25.242 |
| 6/15/2010 11:47:01 | 23.679 | 8/28/2010 12:49:00 | 23.0 | 6/16/2010 09:56:01 | 25.179 |
| 6/15/2010 12:07:01 | 23.679 | 8/28/2010 13:24:00 | 23.0 | 6/16/2010 10:16:01 | 25.179 |
| 6/15/2010 12:27:01 | 23.679 | 8/28/2010 13:59:00 | 23.0 | 6/16/2010 10:36:01 | 25.179 |
| 6/15/2010 12:47:01 | 23.679 | 8/28/2010 14:34:00 | 23.0 | 6/16/2010 10:56:01 | 25.179 |
| 6/15/2010 13:07:01 | 23.679 | 8/28/2010 15:09:00 | 23.0 | 6/16/2010 11:16:01 | 25.179 |
| 6/15/2010 13:27:01 | 23.679 | 8/28/2010 15:44:00 | 23.0 | 6/16/2010 11:36:01 | 25.117 |
| 6/15/2010 13:47:01 | 23.679 | 8/28/2010 16:19:00 | 23.5 | 6/16/2010 11:56:01 | 25.117 |
| 6/15/2010 14:07:01 | 23.679 | 8/28/2010 16:54:00 | 23.5 | 6/16/2010 12:16:01 | 25.117 |
| 6/15/2010 14:27:01 | 23.742 | 8/28/2010 17:29:00 | 23.5 | 6/16/2010 12:36:01 | 25.117 |
| 6/15/2010 14:47:01 | 23.742 | 8/28/2010 18:04:00 | 23.5 | 6/16/2010 12:56:01 | 25.117 |
| 6/15/2010 15:07:01 | 23.804 | 8/28/2010 18:39:00 | 23.5 | 6/16/2010 13:16:01 | 25.117 |
| 6/15/2010 15:27:01 | 23.804 | 8/28/2010 19:14:00 | 23.5 | 6/16/2010 13:36:01 | 25.117 |
| 6/15/2010 15:47:01 | 23.804 | 8/28/2010 19:49:00 | 23.5 | 6/16/2010 13:56:01 | 25.117 |
| 6/15/2010 16:07:01 | 23.867 | 8/28/2010 20:24:00 | 23.5 | 6/16/2010 14:16:01 | 25.054 |
| 6/15/2010 16:27:01 | 23.929 | 8/28/2010 20:59:00 | 23.5 | 6/16/2010 14:36:01 | 25.054 |
| 6/15/2010 16:47:01 | 23.929 | 8/28/2010 21:34:00 | 23.5 | 6/16/2010 14:56:01 | 25.054 |
| 6/15/2010 17:07:01 | 23.992 | 8/28/2010 22:09:00 | 23.5 | 6/16/2010 15:16:01 | 25.054 |
| 6/15/2010 17:27:01 | 23.992 | 8/28/2010 22:44:00 | 23.5 | 6/16/2010 15:36:01 | 25.054 |
| 6/15/2010 17:47:01 | 24.054 | 8/28/2010 23:19:00 | 23.5 | 6/16/2010 15:56:01 | 25.054 |
| 6/15/2010 18:07:01 | 24.054 | 8/28/2010 23:54:00 | 23.5 | 6/16/2010 16:16:01 | 25.054 |
| 6/15/2010 18:27:01 | 24.117 | 8/29/2010 00:29:00 | 23.5 | 6/16/2010 16:36:01 | 25.054 |
| 6/15/2010 18:47:01 | 24.117 | 8/29/2010 01:04:00 | 23.5 | 6/16/2010 16:56:01 | 25.054 |

|                    |        |                    |      |                    |        |
|--------------------|--------|--------------------|------|--------------------|--------|
| 6/15/2010 19:07:01 | 24.179 | 8/29/2010 01:39:00 | 23.5 | 6/16/2010 17:16:01 | 25.054 |
| 6/15/2010 19:27:01 | 24.179 | 8/29/2010 02:14:00 | 23.5 | 6/16/2010 17:36:01 | 25.054 |
| 6/15/2010 19:47:01 | 24.179 | 8/29/2010 02:49:00 | 23.5 | 6/16/2010 17:56:01 | 25.117 |
| 6/15/2010 20:07:01 | 24.242 | 8/29/2010 03:24:00 | 23.5 | 6/16/2010 18:16:01 | 25.117 |
| 6/15/2010 20:27:01 | 24.242 | 8/29/2010 03:59:00 | 23.5 | 6/16/2010 18:36:01 | 25.117 |
| 6/15/2010 20:47:01 | 24.242 | 8/29/2010 04:34:00 | 23.5 | 6/16/2010 18:56:01 | 25.117 |
| 6/15/2010 21:07:01 | 24.242 | 8/29/2010 05:09:00 | 23.5 | 6/16/2010 19:16:01 | 25.117 |
| 6/15/2010 21:27:01 | 24.304 | 8/29/2010 05:44:00 | 23.5 | 6/16/2010 19:36:01 | 25.117 |
| 6/15/2010 21:47:01 | 24.304 | 8/29/2010 06:19:00 | 23.0 | 6/16/2010 19:56:01 | 25.117 |
| 6/15/2010 22:07:01 | 24.304 | 8/29/2010 06:54:00 | 23.0 | 6/16/2010 20:16:01 | 25.179 |
| 6/15/2010 22:27:01 | 24.304 | 8/29/2010 07:29:00 | 23.0 | 6/16/2010 20:36:01 | 25.179 |
| 6/15/2010 22:47:01 | 24.304 | 8/29/2010 08:04:00 | 23.0 | 6/16/2010 20:56:01 | 25.179 |
| 6/15/2010 23:07:01 | 24.304 | 8/29/2010 08:39:00 | 23.0 | 6/16/2010 21:16:01 | 25.179 |
| 6/15/2010 23:27:01 | 24.304 | 8/29/2010 09:14:00 | 23.0 | 6/16/2010 21:36:01 | 25.179 |
| 6/15/2010 23:47:01 | 24.304 | 8/29/2010 09:49:00 | 23.0 | 6/16/2010 21:56:01 | 25.242 |
| 6/16/2010 00:07:01 | 24.304 | 8/29/2010 10:24:00 | 23.0 | 6/16/2010 22:16:01 | 25.242 |
| 6/16/2010 00:27:01 | 24.304 | 8/29/2010 10:59:00 | 23.0 | 6/16/2010 22:36:01 | 25.242 |
| 6/16/2010 00:47:01 | 24.304 | 8/29/2010 11:34:00 | 23.0 | 6/16/2010 22:56:01 | 25.242 |
| 6/16/2010 01:07:01 | 24.304 | 8/29/2010 12:09:00 | 23.0 | 6/16/2010 23:16:01 | 25.242 |
| 6/16/2010 01:27:01 | 24.304 | 8/29/2010 12:44:00 | 23.0 | 6/16/2010 23:36:01 | 25.242 |
| 6/16/2010 01:47:01 | 24.304 | 8/29/2010 13:19:00 | 23.0 | 6/16/2010 23:56:01 | 25.304 |
| 6/16/2010 02:07:01 | 24.304 | 8/29/2010 13:54:00 | 23.0 | 6/17/2010 00:16:01 | 25.304 |
| 6/16/2010 02:27:01 | 24.304 | 8/29/2010 14:29:00 | 23.0 | 6/17/2010 00:36:01 | 25.304 |
| 6/16/2010 02:47:01 | 24.304 | 8/29/2010 15:04:00 | 23.0 | 6/17/2010 00:56:01 | 25.304 |
| 6/16/2010 03:07:01 | 24.304 | 8/29/2010 15:39:00 | 23.5 | 6/17/2010 01:16:01 | 25.304 |
| 6/16/2010 03:27:01 | 24.304 | 8/29/2010 16:14:00 | 23.5 | 6/17/2010 01:36:01 | 25.304 |
| 6/16/2010 03:47:01 | 24.304 | 8/29/2010 16:49:00 | 23.5 | 6/17/2010 01:56:01 | 25.304 |
| 6/16/2010 04:07:01 | 24.242 | 8/29/2010 17:24:00 | 23.5 | 6/17/2010 02:16:01 | 25.304 |
| 6/16/2010 04:27:01 | 24.242 | 8/29/2010 17:59:00 | 23.5 | 6/17/2010 02:36:01 | 25.304 |
| 6/16/2010 04:47:01 | 24.242 | 8/29/2010 18:34:00 | 23.5 | 6/17/2010 02:56:01 | 25.304 |
| 6/16/2010 05:07:01 | 24.242 | 8/29/2010 19:09:00 | 23.5 | 6/17/2010 03:16:01 | 25.304 |
| 6/16/2010 05:27:01 | 24.242 | 8/29/2010 19:44:00 | 23.5 | 6/17/2010 03:36:01 | 25.304 |
| 6/16/2010 05:47:01 | 24.179 | 8/29/2010 20:19:00 | 23.5 | 6/17/2010 03:56:01 | 25.304 |
| 6/16/2010 06:07:01 | 24.179 | 8/29/2010 20:54:00 | 24.0 | 6/17/2010 04:16:01 | 25.304 |
| 6/16/2010 06:27:01 | 24.179 | 8/29/2010 21:29:00 | 24.0 | 6/17/2010 04:36:01 | 25.304 |
| 6/16/2010 06:47:01 | 24.179 | 8/29/2010 22:04:00 | 23.5 | 6/17/2010 04:56:01 | 25.304 |
| 6/16/2010 07:07:01 | 24.117 | 8/29/2010 22:39:00 | 23.5 | 6/17/2010 05:16:01 | 25.304 |
| 6/16/2010 07:27:01 | 24.117 | 8/29/2010 23:14:00 | 23.5 | 6/17/2010 05:36:01 | 25.304 |
| 6/16/2010 07:47:01 | 24.117 | 8/29/2010 23:49:00 | 23.5 | 6/17/2010 05:56:01 | 25.304 |
| 6/16/2010 08:07:01 | 24.117 | 8/30/2010 00:24:00 | 23.5 | 6/17/2010 06:16:01 | 25.304 |
| 6/16/2010 08:27:01 | 24.054 | 8/30/2010 00:59:00 | 23.5 | 6/17/2010 06:36:01 | 25.304 |
| 6/16/2010 08:47:01 | 24.054 | 8/30/2010 01:34:00 | 23.5 | 6/17/2010 06:56:01 | 25.304 |
| 6/16/2010 09:07:01 | 23.992 | 8/30/2010 02:09:00 | 23.5 | 6/17/2010 07:16:01 | 25.304 |
| 6/16/2010 09:27:01 | 23.992 | 8/30/2010 02:44:00 | 23.5 | 6/17/2010 07:36:01 | 25.304 |
| 6/16/2010 09:47:01 | 23.992 | 8/30/2010 03:19:00 | 23.5 | 6/17/2010 07:56:01 | 25.304 |
| 6/16/2010 10:07:01 | 23.992 | 8/30/2010 03:54:00 | 23.5 | 6/17/2010 08:16:01 | 25.304 |
| 6/16/2010 10:27:01 | 23.929 | 8/30/2010 04:29:00 | 23.5 | 6/17/2010 08:36:01 | 25.304 |
| 6/16/2010 10:47:01 | 23.929 | 8/30/2010 05:04:00 | 23.5 | 6/17/2010 08:56:01 | 25.304 |
| 6/16/2010 11:07:01 | 23.929 | 8/30/2010 05:39:00 | 23.5 | 6/17/2010 09:16:01 | 25.242 |
| 6/16/2010 11:27:01 | 23.929 | 8/30/2010 06:14:00 | 23.5 | 6/17/2010 09:36:01 | 25.242 |

|                    |        |                    |      |                    |        |
|--------------------|--------|--------------------|------|--------------------|--------|
| 6/16/2010 11:47:01 | 23.929 | 8/30/2010 06:49:00 | 23.5 | 6/17/2010 09:56:01 | 25.242 |
| 6/16/2010 12:07:01 | 23.867 | 8/30/2010 07:24:00 | 23.5 | 6/17/2010 10:16:01 | 25.242 |
| 6/16/2010 12:27:01 | 23.867 | 8/30/2010 07:59:00 | 23.5 | 6/17/2010 10:36:01 | 25.242 |
| 6/16/2010 12:47:01 | 23.867 | 8/30/2010 08:34:00 | 23.5 | 6/17/2010 10:56:01 | 25.242 |
| 6/16/2010 13:07:01 | 23.867 | 8/30/2010 09:09:00 | 23.5 | 6/17/2010 11:16:01 | 25.179 |
| 6/16/2010 13:27:01 | 23.867 | 8/30/2010 09:44:00 | 23.5 | 6/17/2010 11:36:01 | 25.179 |
| 6/16/2010 13:47:01 | 23.867 | 8/30/2010 10:19:00 | 23.5 | 6/17/2010 11:56:01 | 25.179 |
| 6/16/2010 14:07:01 | 23.929 | 8/30/2010 10:54:00 | 23.5 | 6/17/2010 12:16:01 | 25.179 |
| 6/16/2010 14:27:01 | 23.929 | 8/30/2010 11:29:00 | 23.5 | 6/17/2010 12:36:01 | 25.179 |
| 6/16/2010 14:47:01 | 23.929 | 8/30/2010 12:04:00 | 23.5 | 6/17/2010 12:56:01 | 25.117 |
| 6/16/2010 15:07:01 | 23.992 | 8/30/2010 12:39:00 | 23.5 | 6/17/2010 13:16:01 | 25.117 |
| 6/16/2010 15:27:01 | 23.992 | 8/30/2010 13:14:00 | 23.5 | 6/17/2010 13:36:01 | 25.117 |
| 6/16/2010 15:47:01 | 24.054 | 8/30/2010 13:49:00 | 23.5 | 6/17/2010 13:56:01 | 25.117 |
| 6/16/2010 16:07:01 | 24.054 | 8/30/2010 14:24:00 | 23.5 | 6/17/2010 14:16:01 | 25.117 |
| 6/16/2010 16:27:01 | 24.117 | 8/30/2010 14:59:00 | 23.5 | 6/17/2010 14:36:01 | 25.117 |
| 6/16/2010 16:47:01 | 24.117 | 8/30/2010 15:34:00 | 24.0 | 6/17/2010 14:56:01 | 25.117 |
| 6/16/2010 17:07:01 | 24.179 | 8/30/2010 16:09:00 | 24.0 | 6/17/2010 15:16:01 | 25.117 |
| 6/16/2010 17:27:01 | 24.179 | 8/30/2010 16:44:00 | 24.0 | 6/17/2010 15:36:01 | 25.117 |
| 6/16/2010 17:47:01 | 24.242 | 8/30/2010 17:19:00 | 24.0 | 6/17/2010 15:56:01 | 25.117 |
| 6/16/2010 18:07:01 | 24.242 | 8/30/2010 17:54:00 | 24.0 | 6/17/2010 16:16:01 | 25.117 |
| 6/16/2010 18:27:01 | 24.304 | 8/30/2010 18:29:00 | 24.0 | 6/17/2010 16:36:01 | 25.117 |
| 6/16/2010 18:47:01 | 24.304 | 8/30/2010 19:04:00 | 24.0 | 6/17/2010 16:56:01 | 25.117 |
| 6/16/2010 19:07:01 | 24.304 | 8/30/2010 19:39:00 | 24.0 | 6/17/2010 17:16:01 | 25.117 |
| 6/16/2010 19:27:01 | 24.367 | 8/30/2010 20:14:00 | 24.0 | 6/17/2010 17:36:01 | 25.117 |
| 6/16/2010 19:47:01 | 24.367 | 8/30/2010 20:49:00 | 24.0 | 6/17/2010 17:56:01 | 25.117 |
| 6/16/2010 20:07:01 | 24.367 | 8/30/2010 21:24:00 | 24.0 | 6/17/2010 18:16:01 | 25.117 |
| 6/16/2010 20:27:01 | 24.429 | 8/30/2010 21:59:00 | 24.0 | 6/17/2010 18:36:01 | 25.179 |
| 6/16/2010 20:47:01 | 24.429 | 8/30/2010 22:34:00 | 24.0 | 6/17/2010 18:56:01 | 25.179 |
| 6/16/2010 21:07:01 | 24.429 | 8/30/2010 23:09:00 | 24.0 | 6/17/2010 19:16:01 | 25.179 |
| 6/16/2010 21:27:01 | 24.429 | 8/30/2010 23:44:00 | 24.0 | 6/17/2010 19:36:01 | 25.179 |
| 6/16/2010 21:47:01 | 24.429 | 8/31/2010 00:19:00 | 24.0 | 6/17/2010 19:56:01 | 25.179 |
| 6/16/2010 22:07:01 | 24.429 | 8/31/2010 00:54:00 | 24.0 | 6/17/2010 20:16:01 | 25.242 |
| 6/16/2010 22:27:01 | 24.429 | 8/31/2010 01:29:00 | 24.0 | 6/17/2010 20:36:01 | 25.242 |
| 6/16/2010 22:47:01 | 24.429 | 8/31/2010 02:04:00 | 24.0 | 6/17/2010 20:56:01 | 25.242 |
| 6/16/2010 23:07:01 | 24.429 | 8/31/2010 02:39:00 | 24.0 | 6/17/2010 21:16:01 | 25.242 |
| 6/16/2010 23:27:01 | 24.429 | 8/31/2010 03:14:00 | 24.0 | 6/17/2010 21:36:01 | 25.304 |
| 6/16/2010 23:47:01 | 24.429 | 8/31/2010 03:49:00 | 24.0 | 6/17/2010 21:56:01 | 25.304 |
| 6/17/2010 00:07:01 | 24.429 | 8/31/2010 04:24:00 | 24.0 | 6/17/2010 22:16:01 | 25.304 |
| 6/17/2010 00:27:01 | 24.429 | 8/31/2010 04:59:00 | 24.0 | 6/17/2010 22:36:01 | 25.304 |
| 6/17/2010 00:47:01 | 24.429 | 8/31/2010 05:34:00 | 24.0 | 6/17/2010 22:56:01 | 25.304 |
| 6/17/2010 01:07:01 | 24.429 | 8/31/2010 06:09:00 | 24.0 | 6/17/2010 23:16:01 | 25.367 |
| 6/17/2010 01:27:01 | 24.429 | 8/31/2010 06:44:00 | 23.5 | 6/17/2010 23:36:01 | 25.367 |
| 6/17/2010 01:47:01 | 24.367 | 8/31/2010 07:19:00 | 23.5 | 6/17/2010 23:56:01 | 25.367 |
| 6/17/2010 02:07:01 | 24.367 | 8/31/2010 07:54:00 | 23.5 | 6/18/2010 00:16:01 | 25.367 |
| 6/17/2010 02:27:01 | 24.367 | 8/31/2010 08:29:00 | 23.5 | 6/18/2010 00:36:01 | 25.367 |
| 6/17/2010 02:47:01 | 24.367 | 8/31/2010 09:04:00 | 23.5 | 6/18/2010 00:56:01 | 25.367 |
| 6/17/2010 03:07:01 | 24.367 | 8/31/2010 09:39:00 | 23.5 | 6/18/2010 01:16:01 | 25.367 |
| 6/17/2010 03:27:01 | 24.367 | 8/31/2010 10:14:00 | 23.5 | 6/18/2010 01:36:01 | 25.367 |
| 6/17/2010 03:47:01 | 24.304 | 8/31/2010 10:49:00 | 23.5 | 6/18/2010 01:56:01 | 25.367 |
| 6/17/2010 04:07:01 | 24.304 | 8/31/2010 11:24:00 | 23.5 | 6/18/2010 02:16:01 | 25.429 |

|                    |        |                    |      |                    |        |
|--------------------|--------|--------------------|------|--------------------|--------|
| 6/17/2010 04:27:01 | 24.304 | 8/31/2010 11:59:00 | 23.5 | 6/18/2010 02:36:01 | 25.429 |
| 6/17/2010 04:47:01 | 24.304 | 8/31/2010 12:34:00 | 23.5 | 6/18/2010 02:56:01 | 25.429 |
| 6/17/2010 05:07:01 | 24.304 | 8/31/2010 13:09:00 | 23.5 | 6/18/2010 03:16:01 | 25.429 |
| 6/17/2010 05:27:01 | 24.242 | 8/31/2010 13:44:00 | 23.5 | 6/18/2010 03:36:01 | 25.429 |
| 6/17/2010 05:47:01 | 24.242 | 8/31/2010 14:19:00 | 23.5 | 6/18/2010 03:56:01 | 25.429 |
| 6/17/2010 06:07:01 | 24.242 | 8/31/2010 14:54:00 | 23.5 | 6/18/2010 04:16:01 | 25.429 |
| 6/17/2010 06:27:01 | 24.242 | 8/31/2010 15:29:00 | 23.5 | 6/18/2010 04:36:01 | 25.429 |
| 6/17/2010 06:47:01 | 24.179 | 8/31/2010 16:04:00 | 24.0 | 6/18/2010 04:56:01 | 25.429 |
| 6/17/2010 07:07:01 | 24.179 | 8/31/2010 16:39:00 | 24.0 | 6/18/2010 05:16:01 | 25.429 |
| 6/17/2010 07:27:01 | 24.179 | 8/31/2010 17:14:00 | 24.0 | 6/18/2010 05:36:01 | 25.367 |
| 6/17/2010 07:47:01 | 24.117 | 8/31/2010 17:49:00 | 24.0 | 6/18/2010 05:56:01 | 25.367 |
| 6/17/2010 08:07:01 | 24.117 | 8/31/2010 18:24:00 | 24.0 | 6/18/2010 06:16:01 | 25.367 |
| 6/17/2010 08:27:01 | 24.117 | 8/31/2010 18:59:00 | 24.0 | 6/18/2010 06:36:01 | 25.367 |
| 6/17/2010 08:47:01 | 24.054 | 8/31/2010 19:34:00 | 24.0 | 6/18/2010 06:56:01 | 25.367 |
| 6/17/2010 09:07:01 | 24.054 | 8/31/2010 20:09:00 | 24.0 | 6/18/2010 07:16:01 | 25.367 |
| 6/17/2010 09:27:01 | 24.054 | 8/31/2010 20:44:00 | 24.0 | 6/18/2010 07:36:01 | 25.367 |
| 6/17/2010 09:47:01 | 23.992 | 8/31/2010 21:19:00 | 24.0 | 6/18/2010 07:56:01 | 25.367 |
| 6/17/2010 10:07:01 | 23.992 | 8/31/2010 21:54:00 | 24.0 | 6/18/2010 08:16:01 | 25.367 |
| 6/17/2010 10:27:01 | 23.992 | 8/31/2010 22:29:00 | 24.0 | 6/18/2010 08:36:01 | 25.367 |
| 6/17/2010 10:47:01 | 23.929 | 8/31/2010 23:04:00 | 24.0 | 6/18/2010 08:56:01 | 25.367 |
| 6/17/2010 11:07:01 | 23.929 | 8/31/2010 23:39:00 | 24.0 | 6/18/2010 09:16:01 | 25.304 |
| 6/17/2010 11:27:01 | 23.929 | 9/1/2010 00:14:00  | 24.0 | 6/18/2010 09:36:01 | 25.304 |
| 6/17/2010 11:47:01 | 23.929 | 9/1/2010 00:49:00  | 24.0 | 6/18/2010 09:56:01 | 25.304 |
| 6/17/2010 12:07:01 | 23.867 | 9/1/2010 01:24:00  | 24.0 | 6/18/2010 10:16:01 | 25.304 |
| 6/17/2010 12:27:01 | 23.867 | 9/1/2010 01:59:00  | 24.0 | 6/18/2010 10:36:01 | 25.304 |
| 6/17/2010 12:47:01 | 23.867 | 9/1/2010 02:34:00  | 24.0 | 6/18/2010 10:56:01 | 25.304 |
| 6/17/2010 13:07:01 | 23.867 | 9/1/2010 03:09:00  | 24.0 | 6/18/2010 11:16:01 | 25.304 |
| 6/17/2010 13:27:01 | 23.867 | 9/1/2010 03:44:00  | 24.0 | 6/18/2010 11:36:01 | 25.242 |
| 6/17/2010 13:47:01 | 23.867 | 9/1/2010 04:19:00  | 24.0 | 6/18/2010 11:56:01 | 25.242 |
| 6/17/2010 14:07:01 | 23.929 | 9/1/2010 04:54:00  | 23.5 | 6/18/2010 12:16:01 | 25.242 |
| 6/17/2010 14:27:01 | 23.929 | 9/1/2010 05:29:00  | 23.5 | 6/18/2010 12:36:01 | 25.242 |
| 6/17/2010 14:47:01 | 23.929 | 9/1/2010 06:04:00  | 23.5 | 6/18/2010 12:56:01 | 25.242 |
| 6/17/2010 15:07:01 | 23.992 | 9/1/2010 06:39:00  | 23.5 | 6/18/2010 13:16:01 | 25.242 |
| 6/17/2010 15:27:01 | 23.992 | 9/1/2010 07:14:00  | 23.5 | 6/18/2010 13:36:01 | 25.242 |
| 6/17/2010 15:47:01 | 24.054 | 9/1/2010 07:49:00  | 23.5 | 6/18/2010 13:56:01 | 25.242 |
| 6/17/2010 16:07:01 | 24.054 | 9/1/2010 08:24:00  | 23.5 | 6/18/2010 14:16:01 | 25.242 |
| 6/17/2010 16:27:01 | 24.117 | 9/1/2010 08:59:00  | 23.5 | 6/18/2010 14:36:01 | 25.242 |
| 6/17/2010 16:47:01 | 24.179 | 9/1/2010 09:34:00  | 23.5 | 6/18/2010 14:56:01 | 25.242 |
| 6/17/2010 17:07:01 | 24.179 | 9/1/2010 10:09:00  | 23.5 | 6/18/2010 15:16:01 | 25.242 |
| 6/17/2010 17:27:01 | 24.242 | 9/1/2010 10:44:00  | 23.5 | 6/18/2010 15:36:01 | 25.242 |
| 6/17/2010 17:47:01 | 24.242 | 9/1/2010 11:19:00  | 23.5 | 6/18/2010 15:56:01 | 25.242 |
| 6/17/2010 18:07:01 | 24.304 | 9/1/2010 11:54:00  | 23.5 | 6/18/2010 16:16:01 | 25.242 |
| 6/17/2010 18:27:01 | 24.367 | 9/1/2010 12:29:00  | 23.5 | 6/18/2010 16:36:01 | 25.242 |
| 6/17/2010 18:47:01 | 24.367 | 9/1/2010 13:04:00  | 23.5 | 6/18/2010 16:56:01 | 25.242 |
| 6/17/2010 19:07:01 | 24.429 | 9/1/2010 13:39:00  | 23.5 | 6/18/2010 17:16:01 | 25.242 |
| 6/17/2010 19:27:01 | 24.429 | 9/1/2010 14:14:00  | 23.5 | 6/18/2010 17:36:01 | 25.242 |
| 6/17/2010 19:47:01 | 24.429 | 9/1/2010 14:49:00  | 24.0 | 6/18/2010 17:56:01 | 25.304 |
| 6/17/2010 20:07:01 | 24.429 | 9/1/2010 15:24:00  | 24.0 | 6/18/2010 18:16:01 | 25.304 |
| 6/17/2010 20:27:01 | 24.492 | 9/1/2010 15:59:00  | 24.0 | 6/18/2010 18:36:01 | 25.304 |
| 6/17/2010 20:47:01 | 24.492 | 9/1/2010 16:34:00  | 24.0 | 6/18/2010 18:56:01 | 25.304 |

|                    |        |                   |      |                    |        |
|--------------------|--------|-------------------|------|--------------------|--------|
| 6/17/2010 21:07:01 | 24.492 | 9/1/2010 17:09:00 | 24.0 | 6/18/2010 19:16:01 | 25.304 |
| 6/17/2010 21:27:01 | 24.492 | 9/1/2010 17:44:00 | 24.0 | 6/18/2010 19:36:01 | 25.367 |
| 6/17/2010 21:47:01 | 24.492 | 9/1/2010 18:19:00 | 24.0 | 6/18/2010 19:56:01 | 25.367 |
| 6/17/2010 22:07:01 | 24.492 | 9/1/2010 18:54:00 | 24.0 | 6/18/2010 20:16:01 | 25.367 |
| 6/17/2010 22:27:01 | 24.492 | 9/1/2010 19:29:00 | 24.5 | 6/18/2010 20:36:01 | 25.367 |
| 6/17/2010 22:47:01 | 24.492 | 9/1/2010 20:04:00 | 24.5 | 6/18/2010 20:56:01 | 25.367 |
| 6/17/2010 23:07:01 | 24.492 | 9/1/2010 20:39:00 | 24.5 | 6/18/2010 21:16:01 | 25.429 |
| 6/17/2010 23:27:01 | 24.492 | 9/1/2010 21:14:00 | 24.5 | 6/18/2010 21:36:01 | 25.429 |
| 6/17/2010 23:47:01 | 24.492 | 9/1/2010 21:49:00 | 24.5 | 6/18/2010 21:56:01 | 25.429 |
| 6/18/2010 00:07:01 | 24.492 | 9/1/2010 22:24:00 | 24.5 | 6/18/2010 22:16:01 | 25.429 |
| 6/18/2010 00:27:01 | 24.492 | 9/1/2010 22:59:00 | 24.5 | 6/18/2010 22:36:01 | 25.429 |
| 6/18/2010 00:47:01 | 24.492 | 9/1/2010 23:34:00 | 24.5 | 6/18/2010 22:56:01 | 25.492 |
| 6/18/2010 01:07:01 | 24.429 | 9/2/2010 00:09:00 | 24.5 | 6/18/2010 23:16:01 | 25.492 |
| 6/18/2010 01:27:01 | 24.429 | 9/2/2010 00:44:00 | 24.5 | 6/18/2010 23:36:01 | 25.492 |
| 6/18/2010 01:47:01 | 24.429 | 9/2/2010 01:19:00 | 24.5 | 6/18/2010 23:56:01 | 25.492 |
| 6/18/2010 02:07:01 | 24.429 | 9/2/2010 01:54:00 | 24.5 | 6/19/2010 00:16:01 | 25.492 |
| 6/18/2010 02:27:01 | 24.429 | 9/2/2010 02:29:00 | 24.5 | 6/19/2010 00:36:01 | 25.492 |
| 6/18/2010 02:47:01 | 24.429 | 9/2/2010 03:04:00 | 24.0 | 6/19/2010 00:56:01 | 25.492 |
| 6/18/2010 03:07:01 | 24.429 | 9/2/2010 03:39:00 | 24.0 | 6/19/2010 01:16:01 | 25.492 |
| 6/18/2010 03:27:01 | 24.367 | 9/2/2010 04:14:00 | 24.0 | 6/19/2010 01:36:01 | 25.492 |
| 6/18/2010 03:47:01 | 24.367 | 9/2/2010 04:49:00 | 24.0 | 6/19/2010 01:56:01 | 25.492 |
| 6/18/2010 04:07:01 | 24.367 | 9/2/2010 05:24:00 | 24.0 | 6/19/2010 02:16:01 | 25.492 |
| 6/18/2010 04:27:01 | 24.367 | 9/2/2010 05:59:00 | 24.0 | 6/19/2010 02:36:01 | 25.492 |
| 6/18/2010 04:47:01 | 24.367 | 9/2/2010 06:34:00 | 24.0 | 6/19/2010 02:56:01 | 25.492 |
| 6/18/2010 05:07:01 | 24.304 | 9/2/2010 07:09:00 | 24.0 | 6/19/2010 03:16:01 | 25.492 |
| 6/18/2010 05:27:01 | 24.304 | 9/2/2010 07:44:00 | 24.0 | 6/19/2010 03:36:01 | 25.492 |
| 6/18/2010 05:47:01 | 24.304 | 9/2/2010 08:19:00 | 24.0 | 6/19/2010 03:56:01 | 25.492 |
| 6/18/2010 06:07:01 | 24.304 | 9/2/2010 08:54:00 | 24.0 | 6/19/2010 04:16:01 | 25.492 |
| 6/18/2010 06:27:01 | 24.304 | 9/2/2010 09:29:00 | 24.0 | 6/19/2010 04:36:01 | 25.492 |
| 6/18/2010 06:47:01 | 24.242 | 9/2/2010 10:04:00 | 24.0 | 6/19/2010 04:56:01 | 25.492 |
| 6/18/2010 07:07:01 | 24.242 | 9/2/2010 10:39:00 | 24.0 | 6/19/2010 05:16:01 | 25.492 |
| 6/18/2010 07:27:01 | 24.242 | 9/2/2010 11:14:00 | 24.0 | 6/19/2010 05:36:01 | 25.492 |
| 6/18/2010 07:47:01 | 24.242 | 9/2/2010 11:49:00 | 24.0 | 6/19/2010 05:56:01 | 25.492 |
| 6/18/2010 08:07:01 | 24.179 | 9/2/2010 12:24:00 | 24.0 | 6/19/2010 06:16:01 | 25.429 |
| 6/18/2010 08:27:01 | 24.179 | 9/2/2010 12:59:00 | 24.0 | 6/19/2010 06:36:01 | 25.429 |
| 6/18/2010 08:47:01 | 24.179 | 9/2/2010 13:34:00 | 24.0 | 6/19/2010 06:56:01 | 25.429 |
| 6/18/2010 09:07:01 | 24.179 | 9/2/2010 14:09:00 | 24.0 | 6/19/2010 07:16:01 | 25.429 |
| 6/18/2010 09:27:01 | 24.117 | 9/2/2010 14:44:00 | 24.0 | 6/19/2010 07:36:01 | 25.429 |
| 6/18/2010 09:47:01 | 24.117 | 9/2/2010 15:19:00 | 24.0 | 6/19/2010 07:56:01 | 25.429 |
| 6/18/2010 10:07:01 | 24.117 | 9/2/2010 15:54:00 | 24.0 | 6/19/2010 08:16:01 | 25.367 |
| 6/18/2010 10:27:01 | 24.054 | 9/2/2010 16:29:00 | 24.0 | 6/19/2010 08:36:01 | 25.367 |
| 6/18/2010 10:47:01 | 24.054 | 9/2/2010 17:04:00 | 24.0 | 6/19/2010 08:56:01 | 25.367 |
| 6/18/2010 11:07:01 | 24.054 | 9/2/2010 17:39:00 | 24.5 | 6/19/2010 09:16:01 | 25.367 |
| 6/18/2010 11:27:01 | 24.054 | 9/2/2010 18:14:00 | 24.5 | 6/19/2010 09:36:01 | 25.367 |
| 6/18/2010 11:47:01 | 23.992 | 9/2/2010 18:49:00 | 24.5 | 6/19/2010 09:56:01 | 25.304 |
| 6/18/2010 12:07:01 | 23.992 | 9/2/2010 19:24:00 | 24.5 | 6/19/2010 10:16:01 | 25.304 |
| 6/18/2010 12:27:01 | 23.992 | 9/2/2010 19:59:00 | 24.5 | 6/19/2010 10:36:01 | 25.304 |
| 6/18/2010 12:47:01 | 23.992 | 9/2/2010 20:34:00 | 24.5 | 6/19/2010 10:56:01 | 25.304 |
| 6/18/2010 13:07:01 | 23.992 | 9/2/2010 21:09:00 | 24.5 | 6/19/2010 11:16:01 | 25.242 |
| 6/18/2010 13:27:01 | 23.992 | 9/2/2010 21:44:00 | 24.5 | 6/19/2010 11:36:01 | 25.242 |

|                    |                          |                         |        |
|--------------------|--------------------------|-------------------------|--------|
| 6/18/2010 13:47:01 | 24.054 9/2/2010 22:19:00 | 24.5 6/19/2010 11:56:01 | 25.242 |
| 6/18/2010 14:07:01 | 24.054 9/2/2010 22:54:00 | 24.5 6/19/2010 12:16:01 | 25.242 |
| 6/18/2010 14:27:01 | 24.054 9/2/2010 23:29:00 | 24.5 6/19/2010 12:36:01 | 25.242 |
| 6/18/2010 14:47:01 | 24.054 9/3/2010 00:04:00 | 24.5 6/19/2010 12:56:01 | 25.242 |
| 6/18/2010 15:07:01 | 24.117 9/3/2010 00:39:00 | 24.5 6/19/2010 13:16:01 | 25.179 |
| 6/18/2010 15:27:01 | 24.117 9/3/2010 01:14:00 | 24.5 6/19/2010 13:36:01 | 25.179 |
| 6/18/2010 15:47:01 | 24.179 9/3/2010 01:49:00 | 24.5 6/19/2010 13:56:01 | 25.179 |
| 6/18/2010 16:07:01 | 24.242 9/3/2010 02:24:00 | 24.0 6/19/2010 14:16:01 | 25.179 |
| 6/18/2010 16:27:01 | 24.242 9/3/2010 02:59:00 | 24.0 6/19/2010 14:36:01 | 25.179 |
| 6/18/2010 16:47:01 | 24.304 9/3/2010 03:34:00 | 24.0 6/19/2010 14:56:01 | 25.179 |
| 6/18/2010 17:07:01 | 24.304 9/3/2010 04:09:00 | 24.0 6/19/2010 15:16:01 | 25.179 |
| 6/18/2010 17:27:01 | 24.367 9/3/2010 04:44:00 | 24.0 6/19/2010 15:36:01 | 25.179 |
| 6/18/2010 17:47:01 | 24.367 9/3/2010 05:19:00 | 24.0 6/19/2010 15:56:01 | 25.179 |
| 6/18/2010 18:07:01 | 24.429 9/3/2010 05:54:00 | 24.0 6/19/2010 16:16:01 | 25.179 |
| 6/18/2010 18:27:01 | 24.429 9/3/2010 06:29:00 | 24.0 6/19/2010 16:36:01 | 25.179 |
| 6/18/2010 18:47:01 | 24.492 9/3/2010 07:04:00 | 24.0 6/19/2010 16:56:01 | 25.179 |
| 6/18/2010 19:07:01 | 24.492 9/3/2010 07:39:00 | 24.0 6/19/2010 17:16:01 | 25.179 |
| 6/18/2010 19:27:01 | 24.554 9/3/2010 08:14:00 | 23.5 6/19/2010 17:36:01 | 25.179 |
| 6/18/2010 19:47:01 | 24.554 9/3/2010 08:49:00 | 23.5 6/19/2010 17:56:01 | 25.179 |
| 6/18/2010 20:07:01 | 24.554 9/3/2010 09:24:00 | 23.5 6/19/2010 18:16:01 | 25.242 |
| 6/18/2010 20:27:01 | 24.554 9/3/2010 09:59:00 | 23.5 6/19/2010 18:36:01 | 25.242 |
| 6/18/2010 20:47:01 | 24.617 9/3/2010 10:34:00 | 23.5 6/19/2010 18:56:01 | 25.242 |
| 6/18/2010 21:07:01 | 24.617 9/3/2010 11:09:00 | 23.5 6/19/2010 19:16:01 | 25.242 |
| 6/18/2010 21:27:01 | 24.617 9/3/2010 11:44:00 | 23.5 6/19/2010 19:36:01 | 25.242 |
| 6/18/2010 21:47:01 | 24.617 9/3/2010 12:19:00 | 23.5 6/19/2010 19:56:01 | 25.242 |
| 6/18/2010 22:07:01 | 24.617 9/3/2010 12:54:00 | 23.5 6/19/2010 20:16:01 | 25.304 |
| 6/18/2010 22:27:01 | 24.617 9/3/2010 13:29:00 | 23.5 6/19/2010 20:36:01 | 25.304 |
| 6/18/2010 22:47:01 | 24.617 9/3/2010 14:04:00 | 23.5 6/19/2010 20:56:01 | 25.304 |
| 6/18/2010 23:07:01 | 24.554 9/3/2010 14:39:00 | 23.5 6/19/2010 21:16:01 | 25.304 |
| 6/18/2010 23:27:01 | 24.554 9/3/2010 15:14:00 | 24.0 6/19/2010 21:36:01 | 25.304 |
| 6/18/2010 23:47:01 | 24.554 9/3/2010 15:49:00 | 24.0 6/19/2010 21:56:01 | 25.367 |
| 6/19/2010 00:07:01 | 24.554 9/3/2010 16:24:00 | 24.0 6/19/2010 22:16:01 | 25.367 |
| 6/19/2010 00:27:01 | 24.554 9/3/2010 16:59:00 | 24.0 6/19/2010 22:36:01 | 25.367 |
| 6/19/2010 00:47:01 | 24.492 9/3/2010 17:34:00 | 24.0 6/19/2010 22:56:01 | 25.367 |
| 6/19/2010 01:07:01 | 24.492 9/3/2010 18:09:00 | 24.0 6/19/2010 23:16:01 | 25.367 |
| 6/19/2010 01:27:01 | 24.492 9/3/2010 18:44:00 | 24.0 6/19/2010 23:36:01 | 25.429 |
| 6/19/2010 01:47:01 | 24.429 9/3/2010 19:19:00 | 24.0 6/19/2010 23:56:01 | 25.429 |
| 6/19/2010 02:07:01 | 24.429 9/3/2010 19:54:00 | 24.0 6/20/2010 00:16:01 | 25.429 |
| 6/19/2010 02:27:01 | 24.429 9/3/2010 20:29:00 | 24.0 6/20/2010 00:36:01 | 25.429 |
| 6/19/2010 02:47:01 | 24.429 9/3/2010 21:04:00 | 24.0 6/20/2010 00:56:01 | 25.429 |
| 6/19/2010 03:07:01 | 24.367 9/3/2010 21:39:00 | 24.0 6/20/2010 01:16:01 | 25.429 |
| 6/19/2010 03:27:01 | 24.367 9/3/2010 22:14:00 | 24.0 6/20/2010 01:36:01 | 25.429 |
| 6/19/2010 03:47:01 | 24.367 9/3/2010 22:49:00 | 24.0 6/20/2010 01:56:01 | 25.429 |
| 6/19/2010 04:07:01 | 24.304 9/3/2010 23:24:00 | 24.0 6/20/2010 02:16:01 | 25.429 |
| 6/19/2010 04:27:01 | 24.304 9/3/2010 23:59:00 | 24.0 6/20/2010 02:36:01 | 25.429 |
| 6/19/2010 04:47:01 | 24.304 9/4/2010 00:34:00 | 24.0 6/20/2010 02:56:01 | 25.429 |
| 6/19/2010 05:07:01 | 24.242 9/4/2010 01:09:00 | 24.0 6/20/2010 03:16:01 | 25.429 |
| 6/19/2010 05:27:01 | 24.242 9/4/2010 01:44:00 | 24.0 6/20/2010 03:36:01 | 25.429 |
| 6/19/2010 05:47:01 | 24.242 9/4/2010 02:19:00 | 24.0 6/20/2010 03:56:01 | 25.429 |
| 6/19/2010 06:07:01 | 24.242 9/4/2010 02:54:00 | 24.0 6/20/2010 04:16:01 | 25.429 |



|                    |        |                   |      |                    |         |
|--------------------|--------|-------------------|------|--------------------|---------|
| 6/19/2010 06:27:01 | 24.179 | 9/4/2010 03:29:00 | 24.0 | 6/20/2010 04:36:01 | 25.429  |
| 6/19/2010 06:47:01 | 24.179 | 9/4/2010 04:04:00 | 24.0 | 6/20/2010 04:56:01 | 25.429  |
| 6/19/2010 07:07:01 | 24.179 | 9/4/2010 04:39:00 | 24.0 | 6/20/2010 05:16:01 | 25.429  |
| 6/19/2010 07:27:01 | 24.117 | 9/4/2010 05:14:00 | 24.0 | 6/20/2010 05:36:01 | 25.429  |
| 6/19/2010 07:47:01 | 24.117 | 9/4/2010 05:49:00 | 24.0 | 6/20/2010 05:56:01 | 25.429  |
| 6/19/2010 08:07:01 | 24.054 | 9/4/2010 06:24:00 | 23.5 | 6/20/2010 06:16:01 | 25.429  |
| 6/19/2010 08:27:01 | 24.054 | 9/4/2010 06:59:00 | 23.5 | 6/20/2010 06:36:01 | 25.367  |
| 6/19/2010 08:47:01 | 24.054 | 9/4/2010 07:34:00 | 23.5 | 6/20/2010 06:56:01 | 25.367  |
| 6/19/2010 09:07:01 | 23.992 | 9/4/2010 08:09:00 | 23.5 | 6/20/2010 07:16:01 | 25.367  |
| 6/19/2010 09:27:01 | 23.992 | 9/4/2010 08:44:00 | 23.5 | 6/20/2010 07:36:01 | 25.367  |
| 6/19/2010 09:47:01 | 23.992 | 9/4/2010 09:19:00 | 23.5 | 6/20/2010 07:56:01 | 25.367  |
| 6/19/2010 10:07:01 | 23.929 | 9/4/2010 09:54:00 | 23.5 | 6/20/2010 08:16:01 | 25.367  |
| 6/19/2010 10:27:01 | 23.929 | 9/4/2010 10:29:00 | 23.5 | 6/20/2010 08:36:01 | 25.304  |
| 6/19/2010 10:47:01 | 23.929 | 9/4/2010 11:04:00 | 23.5 | 6/20/2010 08:56:01 | 25.304  |
| 6/19/2010 11:07:01 | 23.929 | 9/4/2010 11:39:00 | 23.5 | 6/20/2010 09:16:01 | 25.304  |
| 6/19/2010 11:27:01 | 23.929 | 9/4/2010 12:14:00 | 23.5 | 6/20/2010 09:36:01 | 25.304  |
| 6/19/2010 11:47:01 | 23.867 | 9/4/2010 12:49:00 | 23.5 | 6/20/2010 09:56:01 | 25.304  |
| 6/19/2010 12:07:01 | 23.867 | 9/4/2010 13:24:00 | 23.5 | 6/20/2010 10:16:01 | 25.304  |
| 6/19/2010 12:27:01 | 23.867 | 9/4/2010 13:59:00 | 23.5 | 6/20/2010 10:36:01 | 25.242  |
| 6/19/2010 12:47:01 | 23.867 | 9/4/2010 14:34:00 | 23.5 | 6/20/2010 10:56:01 | 25.242  |
| 6/19/2010 13:07:01 | 23.867 | 9/4/2010 15:09:00 | 23.5 | 6/20/2010 11:16:01 | 25.242  |
| 6/19/2010 13:27:01 | 23.867 | 9/4/2010 15:44:00 | 24.0 | 6/20/2010 11:36:01 | 25.242  |
| 6/19/2010 13:47:01 | 23.867 | 9/4/2010 16:19:00 | 24.0 | 6/20/2010 11:56:01 | 25.242  |
| 6/19/2010 14:07:01 | 23.929 | 9/4/2010 16:54:00 | 24.0 | 6/20/2010 12:16:01 | 25.179  |
| 6/19/2010 14:27:01 | 23.929 | 9/4/2010 17:29:00 | 24.0 | 6/20/2010 12:36:01 | 25.179  |
| 6/19/2010 14:47:01 | 23.929 | 9/4/2010 18:04:00 | 24.0 | 6/20/2010 12:56:01 | 25.179  |
| 6/19/2010 15:07:01 | 23.992 | 9/4/2010 18:39:00 | 24.0 | 6/20/2010 13:16:01 | 25.179  |
| 6/19/2010 15:27:01 | 23.992 | 9/4/2010 19:14:00 | 24.0 | 6/20/2010 13:36:01 | 25.179  |
| 6/19/2010 15:47:01 | 24.054 | 9/4/2010 19:49:00 | 24.0 | 6/20/2010 13:56:01 | 25.179  |
| 6/19/2010 16:07:01 | 24.054 | 9/4/2010 20:24:00 | 24.0 | 6/20/2010 14:16:01 | 25.117  |
| 6/19/2010 16:27:01 | 24.117 | 9/4/2010 20:59:00 | 24.0 | 6/20/2010 14:36:01 | 25.117  |
| 6/19/2010 16:47:01 | 24.179 | 9/4/2010 21:34:00 | 24.0 | 6/20/2010 14:56:01 | 25.117  |
| 6/19/2010 17:07:01 | 24.179 | 9/4/2010 22:09:00 | 24.0 | 6/20/2010 15:16:01 | 25.117  |
| 6/19/2010 17:27:01 | 24.242 | 9/4/2010 22:44:00 | 24.0 | 6/20/2010 15:36:01 | 25.117  |
| 6/19/2010 17:47:01 | 24.242 | 9/4/2010 23:19:00 | 24.0 | 6/20/2010 15:56:01 | 25.117  |
| 6/19/2010 18:07:01 | 24.304 | 9/4/2010 23:54:00 | 24.0 | 6/20/2010 16:16:01 | 25.117  |
| 6/19/2010 18:27:01 | 24.367 | 9/5/2010 00:29:00 | 24.0 | 6/20/2010 16:36:01 | 25.117  |
| 6/19/2010 18:47:01 | 24.367 | 9/5/2010 01:04:00 | 24.0 | 6/20/2010 16:56:01 | 25.117  |
| 6/19/2010 19:07:01 | 24.429 | 9/5/2010 01:39:00 | 24.0 | 6/20/2010 17:16:01 | 25.117  |
| 6/19/2010 19:27:01 | 24.429 | 9/5/2010 02:14:00 | 24.0 | 6/20/2010 17:36:01 | 25.179  |
| 6/19/2010 19:47:01 | 24.429 | 9/5/2010 02:49:00 | 24.0 | 6/20/2010 17:56:01 | 25.179  |
| 6/19/2010 20:07:01 | 24.429 | 9/5/2010 03:24:00 | 24.0 | 6/20/2010 18:16:01 | 25.179  |
| 6/19/2010 20:27:01 | 24.492 | 9/5/2010 03:59:00 | 24.0 | 6/20/2010 18:36:01 | 25.179  |
| 6/19/2010 20:47:01 | 24.492 | 9/5/2010 04:34:00 | 24.0 | 6/20/2010 18:56:01 | 25.179  |
| 6/19/2010 21:07:01 | 24.492 | 9/5/2010 05:09:00 | 24.0 | 6/20/2010 19:16:01 | 25.242  |
| 6/19/2010 21:27:01 | 24.492 | 9/5/2010 05:44:00 | 24.0 | 6/20/2010 19:36:01 | 25.242  |
| 6/19/2010 21:47:01 | 24.492 | 9/5/2010 06:19:00 | 24.0 | 6/20/2010 19:56:01 | 25.242  |
| 6/19/2010 22:07:01 | 24.492 | 9/5/2010 06:54:00 | 24.0 | 6/20/2010 20:06:01 | 24.0293 |
| 6/19/2010 22:27:01 | 24.492 | 9/5/2010 07:29:00 | 24.0 | 6/20/2010 20:26:01 | 24.0293 |
| 6/19/2010 22:47:01 | 24.492 | 9/5/2010 08:04:00 | 24.0 | 6/20/2010 20:46:01 | 24.1543 |

|                    |        |                   |      |                    |         |
|--------------------|--------|-------------------|------|--------------------|---------|
| 6/19/2010 23:07:01 | 24.492 | 9/5/2010 08:39:00 | 24.0 | 6/20/2010 21:06:01 | 24.2793 |
| 6/19/2010 23:27:01 | 24.492 | 9/5/2010 09:14:00 | 24.0 | 6/20/2010 21:26:01 | 24.4043 |
| 6/19/2010 23:47:01 | 24.429 | 9/5/2010 09:49:00 | 24.0 | 6/20/2010 21:46:01 | 24.5293 |
| 6/20/2010 00:07:01 | 24.429 | 9/5/2010 10:24:00 | 24.0 | 6/20/2010 22:06:01 | 24.6543 |
| 6/20/2010 00:27:01 | 24.429 | 9/5/2010 10:59:00 | 24.0 | 6/20/2010 22:26:01 | 24.7173 |
| 6/20/2010 00:47:01 | 24.429 | 9/5/2010 11:34:00 | 24.0 | 6/20/2010 22:46:01 | 24.7793 |
| 6/20/2010 01:07:01 | 24.429 | 9/5/2010 12:09:00 | 24.0 | 6/20/2010 23:06:01 | 24.8423 |
| 6/20/2010 01:27:01 | 24.429 | 9/5/2010 12:44:00 | 24.0 | 6/20/2010 23:26:01 | 24.9043 |
| 6/20/2010 01:47:01 | 24.429 | 9/5/2010 13:19:00 | 24.0 | 6/20/2010 23:46:01 | 24.9673 |
| 6/20/2010 02:07:01 | 24.367 | 9/5/2010 13:54:00 | 24.0 | 6/21/2010 00:06:01 | 24.9673 |
| 6/20/2010 02:27:01 | 24.367 | 9/5/2010 14:29:00 | 24.0 | 6/21/2010 00:26:01 | 25.0293 |
| 6/20/2010 02:47:01 | 24.367 | 9/5/2010 15:04:00 | 24.0 | 6/21/2010 00:46:01 | 25.0293 |
| 6/20/2010 03:07:01 | 24.367 | 9/5/2010 15:39:00 | 24.0 | 6/21/2010 01:06:01 | 25.0913 |
| 6/20/2010 03:27:01 | 24.304 | 9/5/2010 16:14:00 | 24.0 | 6/21/2010 01:26:01 | 25.0913 |
| 6/20/2010 03:47:01 | 24.304 | 9/5/2010 16:49:00 | 24.5 | 6/21/2010 01:46:01 | 25.1543 |
| 6/20/2010 04:07:01 | 24.304 | 9/5/2010 17:24:00 | 24.5 | 6/21/2010 02:06:01 | 25.1543 |
| 6/20/2010 04:27:01 | 24.304 | 9/5/2010 17:59:00 | 24.5 | 6/21/2010 02:26:01 | 25.1543 |
| 6/20/2010 04:47:01 | 24.304 | 9/5/2010 18:34:00 | 24.5 | 6/21/2010 02:46:01 | 25.2163 |
| 6/20/2010 05:07:01 | 24.242 | 9/5/2010 19:09:00 | 24.5 | 6/21/2010 03:06:01 | 25.2163 |
| 6/20/2010 05:27:01 | 24.242 | 9/5/2010 19:44:00 | 24.5 | 6/21/2010 03:26:01 | 25.2163 |
| 6/20/2010 05:47:01 | 24.242 | 9/5/2010 20:19:00 | 24.5 | 6/21/2010 03:46:01 | 25.2163 |
| 6/20/2010 06:07:01 | 24.242 | 9/5/2010 20:54:00 | 24.5 | 6/21/2010 04:06:01 | 25.2163 |
| 6/20/2010 06:27:01 | 24.179 | 9/5/2010 21:29:00 | 24.5 | 6/21/2010 04:26:01 | 25.2163 |
| 6/20/2010 06:47:01 | 24.179 | 9/5/2010 22:04:00 | 24.5 | 6/21/2010 04:46:01 | 25.2793 |
| 6/20/2010 07:07:01 | 24.179 | 9/5/2010 22:39:00 | 24.5 | 6/21/2010 05:06:01 | 25.2793 |
| 6/20/2010 07:27:01 | 24.117 | 9/5/2010 23:14:00 | 24.5 | 6/21/2010 05:26:01 | 25.2793 |
| 6/20/2010 07:47:01 | 24.117 | 9/5/2010 23:49:00 | 24.5 | 6/21/2010 05:46:01 | 25.2793 |
| 6/20/2010 08:07:01 | 24.117 | 9/6/2010 00:24:00 | 24.5 | 6/21/2010 06:06:01 | 25.2793 |
| 6/20/2010 08:27:01 | 24.054 | 9/6/2010 00:59:00 | 24.5 | 6/21/2010 06:26:01 | 25.2793 |
| 6/20/2010 08:47:01 | 24.054 | 9/6/2010 01:34:00 | 24.5 | 6/21/2010 06:46:01 | 25.2793 |
| 6/20/2010 09:07:01 | 24.054 | 9/6/2010 02:09:00 | 24.5 | 6/21/2010 07:06:01 | 25.2793 |
| 6/20/2010 09:27:01 | 23.992 | 9/6/2010 02:44:00 | 24.5 | 6/21/2010 07:26:01 | 25.2793 |
| 6/20/2010 09:47:01 | 23.992 | 9/6/2010 03:19:00 | 24.5 | 6/21/2010 07:46:01 | 25.2793 |
| 6/20/2010 10:07:01 | 23.992 | 9/6/2010 03:54:00 | 24.5 | 6/21/2010 08:06:01 | 25.2793 |
| 6/20/2010 10:27:01 | 23.929 | 9/6/2010 04:29:00 | 24.5 | 6/21/2010 08:26:01 | 25.2163 |
| 6/20/2010 10:47:01 | 23.929 | 9/6/2010 05:04:00 | 24.5 | 6/21/2010 08:46:01 | 25.2163 |
| 6/20/2010 11:07:01 | 23.929 | 9/6/2010 05:39:00 | 24.5 | 6/21/2010 09:06:01 | 25.2163 |
| 6/20/2010 11:27:01 | 23.929 | 9/6/2010 06:14:00 | 24.5 | 6/21/2010 09:26:01 | 25.2163 |
| 6/20/2010 11:47:01 | 23.867 | 9/6/2010 06:49:00 | 24.5 | 6/21/2010 09:46:01 | 25.2163 |
| 6/20/2010 12:07:01 | 23.867 | 9/6/2010 07:24:00 | 24.5 | 6/21/2010 10:06:01 | 25.2163 |
| 6/20/2010 12:27:01 | 23.867 | 9/6/2010 07:59:00 | 24.5 | 6/21/2010 10:26:01 | 25.2163 |
| 6/20/2010 12:47:01 | 23.867 | 9/6/2010 08:34:00 | 24.5 | 6/21/2010 10:46:01 | 25.2163 |
| 6/20/2010 13:07:01 | 23.867 | 9/6/2010 09:09:00 | 24.5 | 6/21/2010 11:06:01 | 25.2163 |
| 6/20/2010 13:27:01 | 23.867 | 9/6/2010 09:44:00 | 24.5 | 6/21/2010 11:26:01 | 25.1543 |
| 6/20/2010 13:47:01 | 23.867 | 9/6/2010 10:19:00 | 24.5 | 6/21/2010 11:46:01 | 25.1543 |
| 6/20/2010 14:07:01 | 23.929 | 9/6/2010 10:54:00 | 24.5 | 6/21/2010 12:06:01 | 25.1543 |
| 6/20/2010 14:27:01 | 23.929 | 9/6/2010 11:29:00 | 24.5 | 6/21/2010 12:26:01 | 25.1543 |
| 6/20/2010 14:47:01 | 23.929 | 9/6/2010 12:04:00 | 24.5 | 6/21/2010 12:46:01 | 25.1543 |
| 6/20/2010 15:07:01 | 23.992 | 9/6/2010 12:39:00 | 24.5 | 6/21/2010 13:06:01 | 25.1543 |
| 6/20/2010 15:27:01 | 23.992 | 9/6/2010 13:14:00 | 24.5 | 6/21/2010 13:26:01 | 25.1543 |

|                    |                          |                         |         |
|--------------------|--------------------------|-------------------------|---------|
| 6/20/2010 15:47:01 | 24.054 9/6/2010 13:49:00 | 24.5 6/21/2010 13:46:01 | 25.1543 |
| 6/20/2010 16:07:01 | 24.054 9/6/2010 14:24:00 | 24.5 6/21/2010 14:06:01 | 25.1543 |
| 6/20/2010 16:27:01 | 24.117 9/6/2010 14:59:00 | 24.5 6/21/2010 14:26:01 | 25.0913 |
| 6/20/2010 17:02:01 | 24.489 9/6/2010 15:34:00 | 24.5 6/21/2010 14:46:01 | 25.0913 |
| 6/20/2010 17:22:01 | 24.364 9/6/2010 16:09:00 | 24.5 6/21/2010 15:06:01 | 25.0913 |
| 6/20/2010 17:42:01 | 24.364 9/6/2010 16:44:00 | 24.5 6/21/2010 15:26:01 | 25.0913 |
| 6/20/2010 18:02:01 | 24.364 9/6/2010 17:19:00 | 24.5 6/21/2010 15:46:01 | 25.0913 |
| 6/20/2010 18:22:01 | 24.364 9/6/2010 17:54:00 | 24.5 6/21/2010 16:06:01 | 25.0913 |
| 6/20/2010 18:42:01 | 24.426 9/6/2010 18:29:00 | 25.0 6/21/2010 16:26:01 | 25.0913 |
| 6/20/2010 19:02:01 | 24.426 9/6/2010 19:04:00 | 25.0 6/21/2010 16:46:01 | 25.0913 |
| 6/20/2010 19:22:01 | 24.426 9/6/2010 19:39:00 | 25.0 6/21/2010 17:06:01 | 25.0913 |
| 6/20/2010 19:42:01 | 24.426 9/6/2010 20:14:00 | 25.0 6/21/2010 17:26:01 | 25.0913 |
| 6/20/2010 20:02:01 | 24.426 9/6/2010 20:49:00 | 25.0 6/21/2010 17:46:01 | 25.0913 |
| 6/20/2010 20:22:01 | 24.426 9/6/2010 21:24:00 | 25.0 6/21/2010 18:06:01 | 25.0913 |
| 6/20/2010 20:42:01 | 24.489 9/6/2010 21:59:00 | 25.0 6/21/2010 18:26:01 | 25.0913 |
| 6/20/2010 21:02:01 | 24.489 9/6/2010 22:34:00 | 25.0 6/21/2010 18:46:01 | 25.1543 |
| 6/20/2010 21:22:01 | 24.489 9/6/2010 23:09:00 | 25.0 6/21/2010 19:06:01 | 25.1543 |
| 6/20/2010 21:42:01 | 24.489 9/6/2010 23:44:00 | 25.0 6/21/2010 19:26:01 | 25.1543 |
| 6/20/2010 22:02:01 | 24.489 9/7/2010 00:19:00 | 25.0 6/21/2010 19:46:01 | 25.1543 |
| 6/20/2010 22:22:01 | 24.489 9/7/2010 00:54:00 | 24.5 6/21/2010 20:06:01 | 25.1543 |
| 6/20/2010 22:42:01 | 24.489 9/7/2010 01:29:00 | 24.5 6/21/2010 20:26:01 | 25.1543 |
| 6/20/2010 23:02:01 | 24.489 9/7/2010 02:04:00 | 24.5 6/21/2010 20:46:01 | 25.1543 |
| 6/20/2010 23:22:01 | 24.489 9/7/2010 02:39:00 | 24.5 6/21/2010 21:06:01 | 25.2163 |
| 6/20/2010 23:42:01 | 24.489 9/7/2010 03:14:00 | 24.5 6/21/2010 21:26:01 | 25.2163 |
| 6/21/2010 00:02:01 | 24.426 9/7/2010 03:49:00 | 24.5 6/21/2010 21:46:01 | 25.2163 |
| 6/21/2010 00:22:01 | 24.426 9/7/2010 04:24:00 | 24.5 6/21/2010 22:06:01 | 25.2163 |
| 6/21/2010 00:42:01 | 24.426 9/7/2010 04:59:00 | 24.5 6/21/2010 22:26:01 | 25.2163 |
| 6/21/2010 01:02:01 | 24.426 9/7/2010 05:34:00 | 24.5 6/21/2010 22:46:01 | 25.2163 |
| 6/21/2010 01:22:01 | 24.426 9/7/2010 06:09:00 | 24.5 6/21/2010 23:06:01 | 25.2163 |
| 6/21/2010 01:42:01 | 24.426 9/7/2010 06:44:00 | 24.0 6/21/2010 23:26:01 | 25.2793 |
| 6/21/2010 02:02:01 | 24.364 9/7/2010 07:19:00 | 24.0 6/21/2010 23:46:01 | 25.2793 |
| 6/21/2010 02:22:01 | 24.364 9/7/2010 07:54:00 | 24.0 6/22/2010 00:06:01 | 25.2793 |
| 6/21/2010 02:42:01 | 24.364 9/7/2010 08:29:00 | 24.0 6/22/2010 00:26:01 | 25.2793 |
| 6/21/2010 03:02:01 | 24.364 9/7/2010 09:04:00 | 24.0 6/22/2010 00:46:01 | 25.2793 |
| 6/21/2010 03:22:01 | 24.364 9/7/2010 09:39:00 | 24.0 6/22/2010 01:06:01 | 25.2793 |
| 6/21/2010 03:42:01 | 24.301 9/7/2010 10:14:00 | 24.0 6/22/2010 01:26:01 | 25.2793 |
| 6/21/2010 04:02:01 | 24.301 9/7/2010 10:49:00 | 24.0 6/22/2010 01:46:01 | 25.2793 |
| 6/21/2010 04:22:01 | 24.301 9/7/2010 11:24:00 | 24.0 6/22/2010 02:06:01 | 25.2793 |
| 6/21/2010 04:42:01 | 24.301 9/7/2010 11:59:00 | 24.0 6/22/2010 02:26:01 | 25.2793 |
| 6/21/2010 05:02:01 | 24.239 9/7/2010 12:34:00 | 24.0 6/22/2010 02:46:01 | 25.3413 |
| 6/21/2010 05:22:01 | 24.239 9/7/2010 13:09:00 | 24.0 6/22/2010 03:06:01 | 25.2793 |
| 6/21/2010 05:42:01 | 24.239 9/7/2010 13:44:00 | 24.0 6/22/2010 03:26:01 | 25.3413 |
| 6/21/2010 06:02:01 | 24.239 9/7/2010 14:19:00 | 24.0 6/22/2010 03:46:01 | 25.3413 |
| 6/21/2010 06:22:01 | 24.239 9/7/2010 14:54:00 | 24.0 6/22/2010 04:06:01 | 25.3413 |
| 6/21/2010 06:42:01 | 24.176 9/7/2010 15:29:00 | 24.0 6/22/2010 04:26:01 | 25.2793 |
| 6/21/2010 07:02:01 | 24.176 9/7/2010 16:04:00 | 24.0 6/22/2010 04:46:01 | 25.3413 |
| 6/21/2010 07:22:01 | 24.176 9/7/2010 16:39:00 | 24.5 6/22/2010 05:06:01 | 25.3413 |
| 6/21/2010 07:42:01 | 24.114 9/7/2010 17:14:00 | 24.5 6/22/2010 05:26:01 | 25.3413 |
| 6/21/2010 08:02:01 | 24.114 9/7/2010 17:49:00 | 24.5 6/22/2010 05:46:01 | 25.3413 |
| 6/21/2010 08:22:01 | 24.114 9/7/2010 18:24:00 | 24.5 6/22/2010 06:06:01 | 25.2793 |

|                    |        |                   |      |                    |         |
|--------------------|--------|-------------------|------|--------------------|---------|
| 6/21/2010 08:42:01 | 24.114 | 9/7/2010 18:59:00 | 24.5 | 6/22/2010 06:26:01 | 25.2793 |
| 6/21/2010 09:02:01 | 24.051 | 9/7/2010 19:34:00 | 24.5 | 6/22/2010 06:46:01 | 25.2793 |
| 6/21/2010 09:22:01 | 24.051 | 9/7/2010 20:09:00 | 24.5 | 6/22/2010 07:06:01 | 25.2793 |
| 6/21/2010 09:42:01 | 24.051 | 9/7/2010 20:44:00 | 24.5 | 6/22/2010 07:26:01 | 25.2793 |
| 6/21/2010 10:02:01 | 23.989 | 9/7/2010 21:19:00 | 24.5 | 6/22/2010 07:46:01 | 25.2793 |
| 6/21/2010 10:22:01 | 23.989 | 9/7/2010 21:54:00 | 24.5 | 6/22/2010 08:06:01 | 25.2793 |
| 6/21/2010 10:42:01 | 23.989 | 9/7/2010 22:29:00 | 24.5 | 6/22/2010 08:26:01 | 25.2793 |
| 6/21/2010 11:02:01 | 23.989 | 9/7/2010 23:04:00 | 24.5 | 6/22/2010 08:46:01 | 25.2793 |
| 6/21/2010 11:22:01 | 23.926 | 9/7/2010 23:39:00 | 24.5 | 6/22/2010 09:06:01 | 25.2793 |
| 6/21/2010 11:42:01 | 23.926 | 9/8/2010 00:14:00 | 24.5 | 6/22/2010 09:26:01 | 25.2793 |
| 6/21/2010 12:02:01 | 23.926 | 9/8/2010 00:49:00 | 24.5 | 6/22/2010 09:46:01 | 25.2793 |
| 6/21/2010 12:22:01 | 23.926 | 9/8/2010 01:24:00 | 24.5 | 6/22/2010 10:06:01 | 25.2163 |
| 6/21/2010 12:42:01 | 23.926 | 9/8/2010 01:59:00 | 24.5 | 6/22/2010 10:26:01 | 25.2163 |
| 6/21/2010 13:02:01 | 23.864 | 9/8/2010 02:34:00 | 24.0 | 6/22/2010 10:46:01 | 25.2163 |
| 6/21/2010 13:22:01 | 23.864 | 9/8/2010 03:09:00 | 24.0 | 6/22/2010 11:06:01 | 25.2163 |
| 6/21/2010 13:42:01 | 23.864 | 9/8/2010 03:44:00 | 24.0 | 6/22/2010 11:26:01 | 25.2163 |
| 6/21/2010 14:02:01 | 23.864 | 9/8/2010 04:19:00 | 24.0 | 6/22/2010 11:46:01 | 25.2163 |
| 6/21/2010 14:22:01 | 23.864 | 9/8/2010 04:54:00 | 24.0 | 6/22/2010 12:06:01 | 25.2163 |
| 6/21/2010 14:42:01 | 23.926 | 9/8/2010 05:29:00 | 24.0 | 6/22/2010 12:26:01 | 25.2163 |
| 6/21/2010 15:02:01 | 23.926 | 9/8/2010 06:04:00 | 24.0 | 6/22/2010 12:46:01 | 25.2163 |
| 6/21/2010 15:22:01 | 23.926 | 9/8/2010 06:39:00 | 23.5 | 6/22/2010 13:06:01 | 25.1543 |
| 6/21/2010 15:42:01 | 23.926 | 9/8/2010 07:14:00 | 23.5 | 6/22/2010 13:26:01 | 25.1543 |
| 6/21/2010 16:02:01 | 23.989 | 9/8/2010 07:49:00 | 23.5 | 6/22/2010 13:46:01 | 25.1543 |
| 6/21/2010 16:22:01 | 23.989 | 9/8/2010 08:24:00 | 23.5 | 6/22/2010 14:06:01 | 25.1543 |
| 6/21/2010 16:42:01 | 23.989 | 9/8/2010 08:59:00 | 23.5 | 6/22/2010 14:26:01 | 25.1543 |
| 6/21/2010 17:02:01 | 23.989 | 9/8/2010 09:34:00 | 23.5 | 6/22/2010 14:46:01 | 25.1543 |
| 6/21/2010 17:22:01 | 24.051 | 9/8/2010 10:09:00 | 23.5 | 6/22/2010 15:06:01 | 25.1543 |
| 6/21/2010 17:42:01 | 24.051 | 9/8/2010 10:44:00 | 23.5 | 6/22/2010 15:26:01 | 25.1543 |
| 6/21/2010 18:02:01 | 24.114 | 9/8/2010 11:19:00 | 23.5 | 6/22/2010 15:46:01 | 25.1543 |
| 6/21/2010 18:22:01 | 24.114 | 9/8/2010 11:54:00 | 23.5 | 6/22/2010 16:06:01 | 25.1543 |
| 6/21/2010 18:42:01 | 24.176 | 9/8/2010 12:29:00 | 23.5 | 6/22/2010 16:26:01 | 25.1543 |
| 6/21/2010 19:02:01 | 24.176 | 9/8/2010 13:04:00 | 23.5 | 6/22/2010 16:46:01 | 25.1543 |
| 6/21/2010 19:22:01 | 24.176 | 9/8/2010 13:39:00 | 23.5 | 6/22/2010 17:06:01 | 25.1543 |
| 6/21/2010 19:42:01 | 24.176 | 9/8/2010 14:14:00 | 23.5 | 6/22/2010 17:26:01 | 25.1543 |
| 6/21/2010 20:02:01 | 24.239 | 9/8/2010 14:49:00 | 23.5 | 6/22/2010 17:46:01 | 25.1543 |
| 6/21/2010 20:22:01 | 24.239 | 9/8/2010 15:24:00 | 23.5 | 6/22/2010 18:06:01 | 25.1543 |
| 6/21/2010 20:42:01 | 24.301 | 9/8/2010 15:59:00 | 23.5 | 6/22/2010 18:26:01 | 25.1543 |
| 6/21/2010 21:02:01 | 24.239 | 9/8/2010 16:34:00 | 24.0 | 6/22/2010 18:46:01 | 25.1543 |
| 6/21/2010 21:22:01 | 24.301 | 9/8/2010 17:09:00 | 24.0 | 6/22/2010 19:06:01 | 25.1543 |
| 6/21/2010 21:42:01 | 24.301 | 9/8/2010 17:44:00 | 24.0 | 6/22/2010 19:26:01 | 25.1543 |
| 6/21/2010 22:02:01 | 24.301 | 9/8/2010 18:19:00 | 24.0 | 6/22/2010 19:46:01 | 25.2163 |
| 6/21/2010 22:22:01 | 24.301 | 9/8/2010 18:54:00 | 24.0 | 6/22/2010 20:06:01 | 25.2163 |
| 6/21/2010 22:42:01 | 24.301 | 9/8/2010 19:29:00 | 24.0 | 6/22/2010 20:26:01 | 25.2163 |
| 6/21/2010 23:02:01 | 24.301 | 9/8/2010 20:04:00 | 24.5 | 6/22/2010 20:46:01 | 25.2163 |
| 6/21/2010 23:22:01 | 24.301 | 9/8/2010 20:39:00 | 24.0 | 6/22/2010 21:06:01 | 25.2163 |
| 6/21/2010 23:42:01 | 24.301 | 9/8/2010 21:14:00 | 24.5 | 6/22/2010 21:26:01 | 25.2793 |
| 6/22/2010 00:02:01 | 24.301 | 9/8/2010 21:49:00 | 24.5 | 6/22/2010 21:46:01 | 25.2793 |
| 6/22/2010 00:22:01 | 24.301 | 9/8/2010 22:24:00 | 24.5 | 6/22/2010 22:06:01 | 25.2793 |
| 6/22/2010 00:42:01 | 24.301 | 9/8/2010 22:59:00 | 24.0 | 6/22/2010 22:26:01 | 25.2793 |
| 6/22/2010 01:02:01 | 24.301 | 9/8/2010 23:34:00 | 24.0 | 6/22/2010 22:46:01 | 25.2793 |

|                    |                           |                         |         |
|--------------------|---------------------------|-------------------------|---------|
| 6/22/2010 01:22:01 | 24.301 9/9/2010 00:09:00  | 24.0 6/22/2010 23:06:01 | 25.2793 |
| 6/22/2010 01:42:01 | 24.301 9/9/2010 00:44:00  | 24.0 6/22/2010 23:26:01 | 25.2793 |
| 6/22/2010 02:02:01 | 24.301 9/9/2010 01:19:00  | 24.0 6/22/2010 23:46:01 | 25.3413 |
| 6/22/2010 02:22:01 | 24.301 9/9/2010 01:54:00  | 24.0 6/23/2010 00:06:01 | 25.3413 |
| 6/22/2010 02:42:01 | 24.301 9/9/2010 02:29:00  | 24.0 6/23/2010 00:26:01 | 25.3413 |
| 6/22/2010 03:02:01 | 24.239 9/9/2010 03:04:00  | 24.0 6/23/2010 00:46:01 | 25.3413 |
| 6/22/2010 03:22:01 | 24.239 9/9/2010 03:39:00  | 24.0 6/23/2010 01:06:01 | 25.3413 |
| 6/22/2010 03:42:01 | 24.239 9/9/2010 04:14:00  | 24.0 6/23/2010 01:26:01 | 25.3413 |
| 6/22/2010 04:02:01 | 24.239 9/9/2010 04:49:00  | 24.0 6/23/2010 01:46:01 | 25.3413 |
| 6/22/2010 04:22:01 | 24.239 9/9/2010 05:24:00  | 24.0 6/23/2010 02:06:01 | 25.3413 |
| 6/22/2010 04:42:01 | 24.239 9/9/2010 05:59:00  | 23.5 6/23/2010 02:26:01 | 25.4043 |
| 6/22/2010 05:02:01 | 24.239 9/9/2010 06:34:00  | 23.5 6/23/2010 02:46:01 | 25.4043 |
| 6/22/2010 05:22:01 | 24.176 9/9/2010 07:09:00  | 23.5 6/23/2010 03:06:01 | 25.4043 |
| 6/22/2010 05:42:01 | 24.176 9/9/2010 07:44:00  | 23.5 6/23/2010 03:26:01 | 25.4043 |
| 6/22/2010 06:02:01 | 24.176 9/9/2010 08:19:00  | 23.5 6/23/2010 03:46:01 | 25.4043 |
| 6/22/2010 06:22:01 | 24.176 9/9/2010 08:54:00  | 23.5 6/23/2010 04:06:01 | 25.4043 |
| 6/22/2010 06:42:01 | 24.176 9/9/2010 09:29:00  | 23.5 6/23/2010 04:26:01 | 25.4043 |
| 6/22/2010 07:02:01 | 24.114 9/9/2010 10:04:00  | 23.5 6/23/2010 04:46:01 | 25.4043 |
| 6/22/2010 07:22:01 | 24.114 9/9/2010 10:39:00  | 23.5 6/23/2010 05:06:01 | 25.4043 |
| 6/22/2010 07:42:01 | 24.114 9/9/2010 11:14:00  | 23.5 6/23/2010 05:26:01 | 25.4043 |
| 6/22/2010 08:02:01 | 24.114 9/9/2010 11:49:00  | 23.5 6/23/2010 05:46:01 | 25.4043 |
| 6/22/2010 08:22:01 | 24.114 9/9/2010 12:24:00  | 23.5 6/23/2010 06:06:01 | 25.4043 |
| 6/22/2010 08:42:01 | 24.051 9/9/2010 12:59:00  | 23.5 6/23/2010 06:26:01 | 25.4043 |
| 6/22/2010 09:02:01 | 24.051 9/9/2010 13:34:00  | 23.5 6/23/2010 06:46:01 | 25.4043 |
| 6/22/2010 09:22:01 | 24.051 9/9/2010 14:09:00  | 23.5 6/23/2010 07:06:01 | 25.4043 |
| 6/22/2010 09:42:01 | 24.051 9/9/2010 14:44:00  | 23.5 6/23/2010 07:26:01 | 25.4043 |
| 6/22/2010 10:02:01 | 24.051 9/9/2010 15:19:00  | 23.5 6/23/2010 07:46:01 | 25.4043 |
| 6/22/2010 10:22:01 | 23.989 9/9/2010 15:54:00  | 23.5 6/23/2010 08:06:01 | 25.4043 |
| 6/22/2010 10:42:01 | 23.989 9/9/2010 16:29:00  | 23.5 6/23/2010 08:26:01 | 25.4043 |
| 6/22/2010 11:02:01 | 23.989 9/9/2010 17:04:00  | 24.0 6/23/2010 08:46:01 | 25.4043 |
| 6/22/2010 11:22:01 | 23.989 9/9/2010 17:39:00  | 24.0 6/23/2010 09:06:01 | 25.4043 |
| 6/22/2010 11:42:01 | 23.989 9/9/2010 18:14:00  | 24.0 6/23/2010 09:26:01 | 25.4043 |
| 6/22/2010 12:02:01 | 23.989 9/9/2010 18:49:00  | 24.0 6/23/2010 09:46:01 | 25.3413 |
| 6/22/2010 12:22:01 | 23.989 9/9/2010 19:24:00  | 24.0 6/23/2010 10:06:01 | 25.3413 |
| 6/22/2010 12:42:01 | 23.926 9/9/2010 19:59:00  | 24.0 6/23/2010 10:26:01 | 25.3413 |
| 6/22/2010 13:02:01 | 23.926 9/9/2010 20:34:00  | 24.0 6/23/2010 10:46:01 | 25.3413 |
| 6/22/2010 13:22:01 | 23.926 9/9/2010 21:09:00  | 24.0 6/23/2010 11:06:01 | 25.3413 |
| 6/22/2010 13:42:01 | 23.926 9/9/2010 21:44:00  | 24.0 6/23/2010 11:26:01 | 25.3413 |
| 6/22/2010 14:02:01 | 23.926 9/9/2010 22:19:00  | 24.0 6/23/2010 11:46:01 | 25.3413 |
| 6/22/2010 14:22:01 | 23.989 9/9/2010 22:54:00  | 24.0 6/23/2010 12:06:01 | 25.3413 |
| 6/22/2010 14:42:01 | 23.989 9/9/2010 23:29:00  | 24.0 6/23/2010 12:26:01 | 25.3413 |
| 6/22/2010 15:02:01 | 23.989 9/10/2010 00:04:00 | 24.0 6/23/2010 12:46:01 | 25.3413 |
| 6/22/2010 15:22:01 | 23.989 9/10/2010 00:39:00 | 24.0 6/23/2010 13:06:01 | 25.2793 |
| 6/22/2010 15:42:01 | 23.989 9/10/2010 01:14:00 | 24.0 6/23/2010 13:26:01 | 25.2793 |
| 6/22/2010 16:02:01 | 24.051 9/10/2010 01:49:00 | 24.0 6/23/2010 13:46:01 | 25.2793 |
| 6/22/2010 16:22:01 | 24.051 9/10/2010 02:24:00 | 24.0 6/23/2010 14:06:01 | 25.2793 |
| 6/22/2010 16:42:01 | 24.114 9/10/2010 02:59:00 | 24.0 6/23/2010 14:26:01 | 25.2793 |
| 6/22/2010 17:02:01 | 24.114 9/10/2010 03:34:00 | 24.0 6/23/2010 14:46:01 | 25.2793 |
| 6/22/2010 17:22:01 | 24.114 9/10/2010 04:09:00 | 23.5 6/23/2010 15:06:01 | 25.2793 |
| 6/22/2010 17:42:01 | 24.176 9/10/2010 04:44:00 | 23.5 6/23/2010 15:26:01 | 25.2793 |

|                    |        |                    |      |                    |         |
|--------------------|--------|--------------------|------|--------------------|---------|
| 6/22/2010 18:02:01 | 24.176 | 9/10/2010 05:19:00 | 23.5 | 6/23/2010 15:46:01 | 25.2793 |
| 6/22/2010 18:22:01 | 24.239 | 9/10/2010 05:54:00 | 23.5 | 6/23/2010 16:06:01 | 25.2793 |
| 6/22/2010 18:42:01 | 24.239 | 9/10/2010 06:29:00 | 23.5 | 6/23/2010 16:26:01 | 25.2793 |
| 6/22/2010 19:02:01 | 24.239 | 9/10/2010 07:04:00 | 23.5 | 6/23/2010 16:46:01 | 25.2793 |
| 6/22/2010 19:22:01 | 24.301 | 9/10/2010 07:39:00 | 23.5 | 6/23/2010 17:06:01 | 25.2793 |
| 6/22/2010 19:42:01 | 24.301 | 9/10/2010 08:14:00 | 23.5 | 6/23/2010 17:26:01 | 25.2793 |
| 6/22/2010 20:02:01 | 24.301 | 9/10/2010 08:49:00 | 23.5 | 6/23/2010 17:46:01 | 25.2793 |
| 6/22/2010 20:22:01 | 24.364 | 9/10/2010 09:24:00 | 23.0 | 6/23/2010 18:06:01 | 25.2793 |
| 6/22/2010 20:42:01 | 24.364 | 9/10/2010 09:59:00 | 23.0 | 6/23/2010 18:26:01 | 25.3413 |
| 6/22/2010 21:02:01 | 24.364 | 9/10/2010 10:34:00 | 23.0 | 6/23/2010 18:46:01 | 25.3413 |
| 6/22/2010 21:22:01 | 24.426 | 9/10/2010 11:09:00 | 23.0 | 6/23/2010 19:06:01 | 25.3413 |
| 6/22/2010 21:42:01 | 24.426 | 9/10/2010 11:44:00 | 23.0 | 6/23/2010 19:26:01 | 25.3413 |
| 6/22/2010 22:02:01 | 24.426 | 9/10/2010 12:19:00 | 23.0 | 6/23/2010 19:46:01 | 25.3413 |
| 6/22/2010 22:22:01 | 24.426 | 9/10/2010 12:54:00 | 23.5 | 6/23/2010 20:06:01 | 25.3413 |
| 6/22/2010 22:42:01 | 24.426 | 9/10/2010 13:29:00 | 23.5 | 6/23/2010 20:26:01 | 25.3413 |
| 6/22/2010 23:02:01 | 24.426 | 9/10/2010 14:04:00 | 23.5 | 6/23/2010 20:46:01 | 25.3413 |
| 6/22/2010 23:22:01 | 24.426 | 9/10/2010 14:39:00 | 23.5 | 6/23/2010 21:06:01 | 25.4043 |
| 6/22/2010 23:42:01 | 24.489 | 9/10/2010 15:14:00 | 23.5 | 6/23/2010 21:26:01 | 25.4043 |
| 6/23/2010 00:02:01 | 24.426 | 9/10/2010 15:49:00 | 23.5 | 6/23/2010 21:46:01 | 25.4043 |
| 6/23/2010 00:22:01 | 24.489 | 9/10/2010 16:24:00 | 23.5 | 6/23/2010 22:06:01 | 25.4043 |
| 6/23/2010 00:42:01 | 24.489 | 9/10/2010 16:59:00 | 23.5 | 6/23/2010 22:26:01 | 25.4043 |
| 6/23/2010 01:02:01 | 24.489 | 9/10/2010 17:34:00 | 24.0 | 6/23/2010 22:46:01 | 25.4043 |
| 6/23/2010 01:22:01 | 24.489 | 9/10/2010 18:09:00 | 24.0 | 6/23/2010 23:06:01 | 25.4663 |
| 6/23/2010 01:42:01 | 24.489 | 9/10/2010 18:44:00 | 24.0 | 6/23/2010 23:26:01 | 25.4663 |
| 6/23/2010 02:02:01 | 24.489 | 9/10/2010 19:19:00 | 24.0 | 6/23/2010 23:46:01 | 25.4663 |
| 6/23/2010 02:22:01 | 24.489 | 9/10/2010 19:54:00 | 24.0 | 6/24/2010 00:06:01 | 25.4663 |
| 6/23/2010 02:42:01 | 24.489 | 9/10/2010 20:29:00 | 24.0 | 6/24/2010 00:26:01 | 25.4663 |
| 6/23/2010 03:02:01 | 24.426 | 9/10/2010 21:04:00 | 24.0 | 6/24/2010 00:46:01 | 25.4663 |
| 6/23/2010 03:22:01 | 24.426 | 9/10/2010 21:39:00 | 24.0 | 6/24/2010 01:06:01 | 25.4663 |
| 6/23/2010 03:42:01 | 24.426 | 9/10/2010 22:14:00 | 24.0 | 6/24/2010 01:26:01 | 25.4663 |
| 6/23/2010 04:02:01 | 24.426 | 9/10/2010 22:49:00 | 24.0 | 6/24/2010 01:46:01 | 25.4663 |
| 6/23/2010 04:22:01 | 24.426 | 9/10/2010 23:24:00 | 24.0 | 6/24/2010 02:06:01 | 25.4663 |
| 6/23/2010 04:42:01 | 24.426 | 9/10/2010 23:59:00 | 24.0 | 6/24/2010 02:26:01 | 25.4663 |
| 6/23/2010 05:02:01 | 24.426 | 9/11/2010 00:34:00 | 24.0 | 6/24/2010 02:46:01 | 25.4663 |
| 6/23/2010 05:22:01 | 24.426 | 9/11/2010 01:09:00 | 24.0 | 6/24/2010 03:06:01 | 25.4663 |
| 6/23/2010 05:42:01 | 24.426 | 9/11/2010 01:44:00 | 24.0 | 6/24/2010 03:26:01 | 25.4663 |
| 6/23/2010 06:02:01 | 24.426 | 9/11/2010 02:19:00 | 24.0 | 6/24/2010 03:46:01 | 25.4663 |
| 6/23/2010 06:22:01 | 24.364 | 9/11/2010 02:54:00 | 24.0 | 6/24/2010 04:06:01 | 25.4663 |
| 6/23/2010 06:42:01 | 24.364 | 9/11/2010 03:29:00 | 24.0 | 6/24/2010 04:26:01 | 25.4663 |
| 6/23/2010 07:02:01 | 24.364 | 9/11/2010 04:04:00 | 24.0 | 6/24/2010 04:46:01 | 25.4663 |
| 6/23/2010 07:22:01 | 24.364 | 9/11/2010 04:39:00 | 23.5 | 6/24/2010 05:06:01 | 25.4663 |
| 6/23/2010 07:42:01 | 24.364 | 9/11/2010 05:14:00 | 23.5 | 6/24/2010 05:26:01 | 25.4663 |
| 6/23/2010 08:02:01 | 24.364 | 9/11/2010 05:49:00 | 23.5 | 6/24/2010 05:46:01 | 25.4663 |
| 6/23/2010 08:22:01 | 24.301 | 9/11/2010 06:24:00 | 23.5 | 6/24/2010 06:06:01 | 25.4663 |
| 6/23/2010 08:42:01 | 24.301 | 9/11/2010 06:59:00 | 23.5 | 6/24/2010 06:26:01 | 25.4663 |
| 6/23/2010 09:02:01 | 24.301 | 9/11/2010 07:34:00 | 23.5 | 6/24/2010 06:46:01 | 25.4663 |
| 6/23/2010 09:22:01 | 24.301 | 9/11/2010 08:09:00 | 23.5 | 6/24/2010 07:06:01 | 25.4663 |
| 6/23/2010 09:42:01 | 24.301 | 9/11/2010 08:44:00 | 23.5 | 6/24/2010 07:26:01 | 25.4663 |
| 6/23/2010 10:02:01 | 24.301 | 9/11/2010 09:19:00 | 23.5 | 6/24/2010 07:46:01 | 25.4663 |
| 6/23/2010 10:22:01 | 24.239 | 9/11/2010 09:54:00 | 23.0 | 6/24/2010 08:06:01 | 25.4663 |

|                    |        |                    |      |                    |         |
|--------------------|--------|--------------------|------|--------------------|---------|
| 6/23/2010 10:42:01 | 24.239 | 9/11/2010 10:29:00 | 23.0 | 6/24/2010 08:26:01 | 25.4043 |
| 6/23/2010 11:02:01 | 24.239 | 9/11/2010 11:04:00 | 23.5 | 6/24/2010 08:46:01 | 25.4043 |
| 6/23/2010 11:22:01 | 24.239 | 9/11/2010 11:39:00 | 23.5 | 6/24/2010 09:06:01 | 25.4043 |
| 6/23/2010 11:42:01 | 24.239 | 9/11/2010 12:14:00 | 23.5 | 6/24/2010 09:26:01 | 25.4043 |
| 6/23/2010 12:02:01 | 24.239 | 9/11/2010 12:49:00 | 23.5 | 6/24/2010 09:46:01 | 25.4043 |
| 6/23/2010 12:22:01 | 24.239 | 9/11/2010 13:24:00 | 23.5 | 6/24/2010 10:06:01 | 25.4043 |
| 6/23/2010 12:42:01 | 24.239 | 9/11/2010 13:59:00 | 23.5 | 6/24/2010 10:26:01 | 25.3413 |
| 6/23/2010 13:02:01 | 24.176 | 9/11/2010 14:34:00 | 23.5 | 6/24/2010 10:46:01 | 25.3413 |
| 6/23/2010 13:22:01 | 24.239 | 9/11/2010 15:09:00 | 23.5 | 6/24/2010 11:06:01 | 25.3413 |
| 6/23/2010 13:42:01 | 24.239 | 9/11/2010 15:44:00 | 23.5 | 6/24/2010 11:26:01 | 25.3413 |
| 6/23/2010 14:02:01 | 24.176 | 9/11/2010 16:19:00 | 23.5 | 6/24/2010 11:46:01 | 25.3413 |
| 6/23/2010 14:22:01 | 24.239 | 9/11/2010 16:54:00 | 24.0 | 6/24/2010 12:06:01 | 25.3413 |
| 6/23/2010 14:42:01 | 24.239 | 9/11/2010 17:29:00 | 24.0 | 6/24/2010 12:26:01 | 25.2793 |
| 6/23/2010 15:02:01 | 24.239 | 9/11/2010 18:04:00 | 24.0 | 6/24/2010 12:46:01 | 25.2793 |
| 6/23/2010 15:22:01 | 24.239 | 9/11/2010 18:39:00 | 24.0 | 6/24/2010 13:06:01 | 25.2793 |
| 6/23/2010 15:42:01 | 24.301 | 9/11/2010 19:14:00 | 24.0 | 6/24/2010 13:26:01 | 25.2793 |
| 6/23/2010 16:02:01 | 24.301 | 9/11/2010 19:30:00 | 24.5 | 6/24/2010 13:46:01 | 25.2793 |
| 6/23/2010 16:22:01 | 24.301 | 9/11/2010 20:05:00 | 24.5 | 6/24/2010 14:06:01 | 25.2793 |
| 6/23/2010 16:42:01 | 24.364 | 9/11/2010 20:40:00 | 24.5 | 6/24/2010 14:26:01 | 25.2793 |
| 6/23/2010 17:02:01 | 24.364 | 9/11/2010 21:15:00 | 24.5 | 6/24/2010 14:46:01 | 25.2793 |
| 6/23/2010 17:22:01 | 24.364 | 9/11/2010 21:50:00 | 25.0 | 6/24/2010 15:06:01 | 25.2163 |
| 6/23/2010 17:42:01 | 24.426 | 9/11/2010 22:25:00 | 25.0 | 6/24/2010 15:26:01 | 25.2163 |
| 6/23/2010 18:02:01 | 24.426 | 9/11/2010 23:00:00 | 25.0 | 6/24/2010 15:46:01 | 25.2163 |
| 6/23/2010 18:22:01 | 24.426 | 9/11/2010 23:35:00 | 25.0 | 6/24/2010 16:06:01 | 25.2163 |
| 6/23/2010 18:42:01 | 24.489 | 9/12/2010 00:10:00 | 25.0 | 6/24/2010 16:26:01 | 25.2163 |
| 6/23/2010 19:02:01 | 24.489 | 9/12/2010 00:45:00 | 25.0 | 6/24/2010 16:46:01 | 25.2163 |
| 6/23/2010 19:22:01 | 24.489 | 9/12/2010 01:20:00 | 25.0 | 6/24/2010 17:06:01 | 25.2163 |
| 6/23/2010 19:42:01 | 24.551 | 9/12/2010 01:55:00 | 25.0 | 6/24/2010 17:26:01 | 25.2793 |
| 6/23/2010 20:02:01 | 24.551 | 9/12/2010 02:30:00 | 25.0 | 6/24/2010 17:46:01 | 25.2793 |
| 6/23/2010 20:22:01 | 24.551 | 9/12/2010 03:05:00 | 25.0 | 6/24/2010 18:06:01 | 25.2793 |
| 6/23/2010 20:42:01 | 24.551 | 9/12/2010 03:40:00 | 24.5 | 6/24/2010 18:26:01 | 25.2793 |
| 6/23/2010 21:02:01 | 24.551 | 9/12/2010 04:15:00 | 24.5 | 6/24/2010 18:46:01 | 25.2793 |
| 6/23/2010 21:22:01 | 24.551 | 9/12/2010 04:50:00 | 24.5 | 6/24/2010 19:06:01 | 25.2793 |
| 6/23/2010 21:42:01 | 24.614 | 9/12/2010 05:25:00 | 24.5 | 6/24/2010 19:26:01 | 25.2793 |
| 6/23/2010 22:02:01 | 24.614 | 9/12/2010 06:00:00 | 24.5 | 6/24/2010 19:46:01 | 25.2793 |
| 6/23/2010 22:22:01 | 24.614 | 9/12/2010 06:35:00 | 24.5 | 6/24/2010 20:06:01 | 25.2793 |
| 6/23/2010 22:42:01 | 24.614 | 9/12/2010 07:10:00 | 24.5 | 6/24/2010 20:26:01 | 25.2793 |
| 6/23/2010 23:02:01 | 24.614 | 9/12/2010 07:45:00 | 24.5 | 6/24/2010 20:46:01 | 25.2793 |
| 6/23/2010 23:22:01 | 24.614 | 9/12/2010 08:20:00 | 24.5 | 6/24/2010 21:06:01 | 25.2793 |
| 6/23/2010 23:42:01 | 24.614 | 9/12/2010 08:55:00 | 24.5 | 6/24/2010 21:26:01 | 25.3413 |
| 6/24/2010 00:02:01 | 24.614 | 9/12/2010 09:30:00 | 24.5 | 6/24/2010 21:46:01 | 25.3413 |
| 6/24/2010 00:22:01 | 24.614 | 9/12/2010 10:05:00 | 24.5 | 6/24/2010 22:06:01 | 25.3413 |
| 6/24/2010 00:42:01 | 24.551 | 9/12/2010 10:40:00 | 24.5 | 6/24/2010 22:26:01 | 25.3413 |
| 6/24/2010 01:02:01 | 24.614 | 9/12/2010 11:15:00 | 24.5 | 6/24/2010 22:46:01 | 25.3413 |
| 6/24/2010 01:22:01 | 24.551 | 9/12/2010 11:50:00 | 24.5 | 6/24/2010 23:06:01 | 25.3413 |
| 6/24/2010 01:42:01 | 24.551 | 9/12/2010 12:25:00 | 24.5 | 6/24/2010 23:26:01 | 25.3413 |
| 6/24/2010 02:02:01 | 24.551 | 9/12/2010 13:00:00 | 24.5 | 6/24/2010 23:46:01 | 25.3413 |
| 6/24/2010 02:22:01 | 24.551 | 9/12/2010 13:35:00 | 24.5 | 6/25/2010 00:06:01 | 25.3413 |
| 6/24/2010 02:42:01 | 24.551 | 9/12/2010 14:10:00 | 24.5 | 6/25/2010 00:26:01 | 25.3413 |
| 6/24/2010 03:02:01 | 24.551 | 9/12/2010 14:45:00 | 24.5 | 6/25/2010 00:46:01 | 25.3413 |

|                    |        |                    |      |                    |         |
|--------------------|--------|--------------------|------|--------------------|---------|
| 6/24/2010 03:22:01 | 24.551 | 9/12/2010 15:20:00 | 25.0 | 6/25/2010 01:06:01 | 25.3413 |
| 6/24/2010 03:42:01 | 24.489 | 9/12/2010 15:55:00 | 25.0 | 6/25/2010 01:26:01 | 25.3413 |
| 6/24/2010 04:02:01 | 24.489 | 9/12/2010 16:30:00 | 25.0 | 6/25/2010 01:46:01 | 25.4043 |
| 6/24/2010 04:22:01 | 24.489 | 9/12/2010 17:05:00 | 25.0 | 6/25/2010 02:06:01 | 25.4043 |
| 6/24/2010 04:42:01 | 24.489 | 9/12/2010 17:40:00 | 25.0 | 6/25/2010 02:26:01 | 25.4043 |
| 6/24/2010 05:02:01 | 24.489 | 9/12/2010 18:15:00 | 25.0 | 6/25/2010 02:46:01 | 25.4043 |
| 6/24/2010 05:22:01 | 24.489 | 9/12/2010 18:50:00 | 25.0 | 6/25/2010 03:06:01 | 25.4043 |
| 6/24/2010 05:42:01 | 24.426 | 9/12/2010 19:25:00 | 25.0 | 6/25/2010 03:26:01 | 25.4043 |
| 6/24/2010 06:02:01 | 24.426 | 9/12/2010 20:00:00 | 25.0 | 6/25/2010 03:46:01 | 25.4043 |
| 6/24/2010 06:22:01 | 24.426 | 9/12/2010 20:35:00 | 25.5 | 6/25/2010 04:06:01 | 25.4043 |
| 6/24/2010 06:42:01 | 24.426 | 9/12/2010 21:10:00 | 25.5 | 6/25/2010 04:26:01 | 25.3413 |
| 6/24/2010 07:02:01 | 24.364 | 9/12/2010 21:45:00 | 25.5 | 6/25/2010 04:46:01 | 25.3413 |
| 6/24/2010 07:22:01 | 24.364 | 9/12/2010 22:20:00 | 25.5 | 6/25/2010 05:06:01 | 25.3413 |
| 6/24/2010 07:42:01 | 24.364 | 9/12/2010 22:55:00 | 25.5 | 6/25/2010 05:26:01 | 25.3413 |
| 6/24/2010 08:02:01 | 24.364 | 9/12/2010 23:30:00 | 25.5 | 6/25/2010 05:46:01 | 25.3413 |
| 6/24/2010 08:22:01 | 24.301 | 9/13/2010 00:05:00 | 25.5 | 6/25/2010 06:06:01 | 25.3413 |
| 6/24/2010 08:42:01 | 24.301 | 9/13/2010 00:40:00 | 25.5 | 6/25/2010 06:26:01 | 25.3413 |
| 6/24/2010 09:02:01 | 24.301 | 9/13/2010 01:15:00 | 25.5 | 6/25/2010 06:46:01 | 25.3413 |
| 6/24/2010 09:22:01 | 24.301 | 9/13/2010 01:50:00 | 25.5 | 6/25/2010 07:06:01 | 25.3413 |
| 6/24/2010 09:42:01 | 24.239 | 9/13/2010 02:25:00 | 25.5 | 6/25/2010 07:26:01 | 25.3413 |
| 6/24/2010 10:02:01 | 24.239 | 9/13/2010 03:00:00 | 25.5 | 6/25/2010 07:46:01 | 25.2793 |
| 6/24/2010 10:22:01 | 24.239 | 9/13/2010 03:35:00 | 25.5 | 6/25/2010 08:06:01 | 25.2793 |
| 6/24/2010 10:42:01 | 24.239 | 9/13/2010 04:10:00 | 25.5 | 6/25/2010 08:26:01 | 25.2793 |
| 6/24/2010 11:02:01 | 24.176 | 9/13/2010 04:45:00 | 25.0 | 6/25/2010 08:46:01 | 25.2793 |
| 6/24/2010 11:22:01 | 24.176 | 9/13/2010 05:20:00 | 25.0 | 6/25/2010 09:06:01 | 25.2793 |
| 6/24/2010 11:42:01 | 24.176 | 9/13/2010 05:55:00 | 25.0 | 6/25/2010 09:26:01 | 25.2793 |
| 6/24/2010 12:02:01 | 24.176 | 9/13/2010 06:30:00 | 25.0 | 6/25/2010 09:46:01 | 25.2163 |
| 6/24/2010 12:22:01 | 24.114 | 9/13/2010 07:05:00 | 25.0 | 6/25/2010 10:06:01 | 25.2163 |
| 6/24/2010 12:42:01 | 24.114 | 9/13/2010 07:40:00 | 25.0 | 6/25/2010 10:26:01 | 25.2163 |
| 6/24/2010 13:02:01 | 24.114 | 9/13/2010 08:15:00 | 25.0 | 6/25/2010 10:46:01 | 25.2163 |
| 6/24/2010 13:22:01 | 24.114 | 9/13/2010 08:50:00 | 25.0 | 6/25/2010 11:06:01 | 25.1543 |
| 6/24/2010 13:42:01 | 24.114 | 9/13/2010 09:25:00 | 25.0 | 6/25/2010 11:26:01 | 25.1543 |
| 6/24/2010 14:02:01 | 24.114 | 9/13/2010 10:00:00 | 25.0 | 6/25/2010 11:46:01 | 25.1543 |
| 6/24/2010 14:22:01 | 24.114 | 9/13/2010 10:35:00 | 25.0 | 6/25/2010 12:06:01 | 25.1543 |
| 6/24/2010 14:42:01 | 24.114 | 9/13/2010 11:10:00 | 25.0 | 6/25/2010 12:26:01 | 25.1543 |
| 6/24/2010 15:02:01 | 24.114 | 9/13/2010 11:45:00 | 25.0 | 6/25/2010 12:46:01 | 25.0913 |
| 6/24/2010 15:22:01 | 24.176 | 9/13/2010 12:20:00 | 25.0 | 6/25/2010 13:06:01 | 25.0913 |
| 6/24/2010 15:42:01 | 24.176 | 9/13/2010 12:55:00 | 25.0 | 6/25/2010 13:26:01 | 25.0913 |
| 6/24/2010 16:02:01 | 24.176 | 9/13/2010 13:30:00 | 25.0 | 6/25/2010 13:46:01 | 25.0913 |
| 6/24/2010 16:22:01 | 24.239 | 9/13/2010 14:05:00 | 25.0 | 6/25/2010 14:06:01 | 25.0913 |
| 6/24/2010 16:42:01 | 24.239 | 9/13/2010 14:40:00 | 25.0 | 6/25/2010 14:26:01 | 25.0293 |
| 6/24/2010 17:02:01 | 24.239 | 9/13/2010 15:15:00 | 25.0 | 6/25/2010 14:46:01 | 25.0293 |
| 6/24/2010 17:22:01 | 24.301 | 9/13/2010 15:50:00 | 25.5 | 6/25/2010 15:06:01 | 25.0293 |
| 6/24/2010 17:42:01 | 24.301 | 9/13/2010 16:25:00 | 25.5 | 6/25/2010 15:26:01 | 25.0293 |
| 6/24/2010 18:02:01 | 24.301 | 9/13/2010 17:00:00 | 25.5 | 6/25/2010 15:46:01 | 25.0293 |
| 6/24/2010 18:22:01 | 24.364 | 9/13/2010 17:35:00 | 25.5 | 6/25/2010 16:06:01 | 25.0293 |
| 6/24/2010 18:42:01 | 24.364 | 9/13/2010 18:10:00 | 25.5 | 6/25/2010 16:26:01 | 25.0293 |
| 6/24/2010 19:02:01 | 24.364 | 9/13/2010 18:45:00 | 25.5 | 6/25/2010 16:46:01 | 25.0293 |
| 6/24/2010 19:22:01 | 24.426 | 9/13/2010 19:20:00 | 25.5 | 6/25/2010 17:06:01 | 25.0293 |
| 6/24/2010 19:42:01 | 24.426 | 9/13/2010 19:55:00 | 25.5 | 6/25/2010 17:26:01 | 25.0293 |



|                    |        |                    |      |                    |         |
|--------------------|--------|--------------------|------|--------------------|---------|
| 6/24/2010 20:02:01 | 24.426 | 9/13/2010 20:30:00 | 25.5 | 6/25/2010 17:46:01 | 25.0293 |
| 6/24/2010 20:22:01 | 24.426 | 9/13/2010 21:05:00 | 25.5 | 6/25/2010 18:06:01 | 25.0293 |
| 6/24/2010 20:42:01 | 24.489 | 9/13/2010 21:40:00 | 25.5 | 6/25/2010 18:26:01 | 25.0293 |
| 6/24/2010 21:02:01 | 24.489 | 9/13/2010 22:15:00 | 25.5 | 6/25/2010 18:46:01 | 25.0293 |
| 6/24/2010 21:22:01 | 24.489 | 9/13/2010 22:50:00 | 25.5 | 6/25/2010 19:06:01 | 25.0293 |
| 6/24/2010 21:42:01 | 24.489 | 9/13/2010 23:25:00 | 25.5 | 6/25/2010 19:26:01 | 25.0293 |
| 6/24/2010 22:02:01 | 24.489 | 9/14/2010 00:00:00 | 25.5 | 6/25/2010 19:46:01 | 25.0293 |
| 6/24/2010 22:22:01 | 24.489 | 9/14/2010 00:35:00 | 25.5 | 6/25/2010 20:06:01 | 25.0293 |
| 6/24/2010 22:42:01 | 24.489 | 9/14/2010 01:10:00 | 25.5 | 6/25/2010 20:26:01 | 25.0293 |
| 6/24/2010 23:02:01 | 24.489 | 9/14/2010 01:45:00 | 25.5 | 6/25/2010 20:46:01 | 25.0293 |
| 6/24/2010 23:22:01 | 24.489 | 9/14/2010 02:20:00 | 25.5 | 6/25/2010 21:06:01 | 25.0913 |
| 6/24/2010 23:42:01 | 24.489 | 9/14/2010 02:55:00 | 25.5 | 6/25/2010 21:26:01 | 25.0913 |
| 6/25/2010 00:02:01 | 24.489 | 9/14/2010 03:30:00 | 25.5 | 6/25/2010 21:46:01 | 25.0913 |
| 6/25/2010 00:22:01 | 24.489 | 9/14/2010 04:05:00 | 25.5 | 6/25/2010 22:06:01 | 25.0913 |
| 6/25/2010 00:42:01 | 24.489 | 9/14/2010 04:40:00 | 25.5 | 6/25/2010 22:26:01 | 25.0913 |
| 6/25/2010 01:02:01 | 24.489 | 9/14/2010 05:15:00 | 25.5 | 6/25/2010 22:46:01 | 25.0913 |
| 6/25/2010 01:22:01 | 24.489 | 9/14/2010 05:50:00 | 25.5 | 6/25/2010 23:06:01 | 25.0913 |
| 6/25/2010 01:42:01 | 24.489 | 9/14/2010 06:25:00 | 25.5 | 6/25/2010 23:26:01 | 25.0913 |
| 6/25/2010 02:02:01 | 24.426 | 9/14/2010 07:00:00 | 25.5 | 6/25/2010 23:46:01 | 25.0913 |
| 6/25/2010 02:22:01 | 24.426 | 9/14/2010 07:35:00 | 25.0 | 6/26/2010 00:06:01 | 25.0913 |
| 6/25/2010 02:42:01 | 24.426 | 9/14/2010 08:10:00 | 25.0 | 6/26/2010 00:26:01 | 25.1543 |
| 6/25/2010 03:02:01 | 24.426 | 9/14/2010 08:45:00 | 25.0 | 6/26/2010 00:46:01 | 25.1543 |
| 6/25/2010 03:22:01 | 24.364 | 9/14/2010 09:20:00 | 25.0 | 6/26/2010 01:06:01 | 25.1543 |
| 6/25/2010 03:42:01 | 24.364 | 9/14/2010 09:55:00 | 25.0 | 6/26/2010 01:26:01 | 25.1543 |
| 6/25/2010 04:02:01 | 24.364 | 9/14/2010 10:30:00 | 25.0 | 6/26/2010 01:46:01 | 25.1543 |
| 6/25/2010 04:22:01 | 24.364 | 9/14/2010 11:05:00 | 25.0 | 6/26/2010 02:06:01 | 25.1543 |
| 6/25/2010 04:42:01 | 24.301 | 9/14/2010 11:40:00 | 25.0 | 6/26/2010 02:26:01 | 25.1543 |
| 6/25/2010 05:02:01 | 24.301 | 9/14/2010 12:15:00 | 25.0 | 6/26/2010 02:46:01 | 25.1543 |
| 6/25/2010 05:22:01 | 24.301 | 9/14/2010 12:50:00 | 25.0 | 6/26/2010 03:06:01 | 25.1543 |
| 6/25/2010 05:42:01 | 24.239 | 9/14/2010 13:25:00 | 25.0 | 6/26/2010 03:26:01 | 25.1543 |
| 6/25/2010 06:02:01 | 24.239 | 9/14/2010 14:00:00 | 25.0 | 6/26/2010 03:46:01 | 25.1543 |
| 6/25/2010 06:22:01 | 24.239 | 9/14/2010 14:35:00 | 25.0 | 6/26/2010 04:06:01 | 25.1543 |
| 6/25/2010 06:42:01 | 24.176 | 9/14/2010 15:10:00 | 25.0 | 6/26/2010 04:26:01 | 25.1543 |
| 6/25/2010 07:02:01 | 24.176 | 9/14/2010 15:45:00 | 25.5 | 6/26/2010 04:46:01 | 25.1543 |
| 6/25/2010 07:22:01 | 24.176 | 9/14/2010 16:20:00 | 25.5 | 6/26/2010 05:06:01 | 25.1543 |
| 6/25/2010 07:42:01 | 24.114 | 9/14/2010 16:55:00 | 25.5 | 6/26/2010 05:26:01 | 25.1543 |
| 6/25/2010 08:02:01 | 24.114 | 9/14/2010 17:30:00 | 25.5 | 6/26/2010 05:46:01 | 25.1543 |
| 6/25/2010 08:22:01 | 24.114 | 9/14/2010 18:05:00 | 25.5 | 6/26/2010 06:06:01 | 25.1543 |
| 6/25/2010 08:42:01 | 24.051 | 9/14/2010 18:40:00 | 25.5 | 6/26/2010 06:26:01 | 25.1543 |
| 6/25/2010 09:02:01 | 24.051 | 9/14/2010 19:15:00 | 25.5 | 6/26/2010 06:46:01 | 25.0913 |
| 6/25/2010 09:22:01 | 23.989 | 9/14/2010 19:50:00 | 25.5 | 6/26/2010 07:06:01 | 25.0913 |
| 6/25/2010 09:42:01 | 23.989 | 9/14/2010 20:25:00 | 25.5 | 6/26/2010 07:26:01 | 25.0913 |
| 6/25/2010 10:02:01 | 23.989 | 9/14/2010 21:00:00 | 25.5 | 6/26/2010 07:46:01 | 25.0913 |
| 6/25/2010 10:22:01 | 23.926 | 9/14/2010 21:35:00 | 25.5 | 6/26/2010 08:06:01 | 25.0913 |
| 6/25/2010 10:42:01 | 23.926 | 9/14/2010 22:10:00 | 25.5 | 6/26/2010 08:26:01 | 25.0913 |
| 6/25/2010 11:02:01 | 23.864 | 9/14/2010 22:45:00 | 25.5 | 6/26/2010 08:46:01 | 25.0913 |
| 6/25/2010 11:22:01 | 23.864 | 9/14/2010 23:20:00 | 25.5 | 6/26/2010 09:06:01 | 25.0913 |
| 6/25/2010 11:42:01 | 23.864 | 9/14/2010 23:55:00 | 25.5 | 6/26/2010 09:26:01 | 25.0913 |
| 6/25/2010 12:02:01 | 23.801 | 9/15/2010 00:30:00 | 25.5 | 6/26/2010 09:46:01 | 25.0293 |
| 6/25/2010 12:22:01 | 23.801 | 9/15/2010 01:05:00 | 25.5 | 6/26/2010 10:06:01 | 25.0293 |

|                    |        |                    |      |                    |         |
|--------------------|--------|--------------------|------|--------------------|---------|
| 6/25/2010 12:42:01 | 23.801 | 9/15/2010 01:40:00 | 25.5 | 6/26/2010 10:26:01 | 25.0293 |
| 6/25/2010 13:02:01 | 23.801 | 9/15/2010 02:15:00 | 25.5 | 6/26/2010 10:46:01 | 25.0293 |
| 6/25/2010 13:22:01 | 23.739 | 9/15/2010 02:50:00 | 25.5 | 6/26/2010 11:06:01 | 25.0293 |
| 6/25/2010 13:42:01 | 23.739 | 9/15/2010 03:25:00 | 25.5 | 6/26/2010 11:26:01 | 25.0293 |
| 6/25/2010 14:02:01 | 23.739 | 9/15/2010 04:00:00 | 25.5 | 6/26/2010 11:46:01 | 25.0293 |
| 6/25/2010 14:22:01 | 23.739 | 9/15/2010 04:35:00 | 25.0 | 6/26/2010 12:06:01 | 25.0293 |
| 6/25/2010 14:42:01 | 23.739 | 9/15/2010 05:10:00 | 25.0 | 6/26/2010 12:26:01 | 24.9673 |
| 6/25/2010 15:02:01 | 23.801 | 9/15/2010 05:45:00 | 25.0 | 6/26/2010 12:46:01 | 24.9673 |
| 6/25/2010 15:22:01 | 23.801 | 9/15/2010 06:20:00 | 25.0 | 6/26/2010 13:06:01 | 24.9673 |
| 6/25/2010 15:42:01 | 23.801 | 9/15/2010 06:55:00 | 25.0 | 6/26/2010 13:26:01 | 24.9673 |
| 6/25/2010 16:02:01 | 23.801 | 9/15/2010 07:30:00 | 25.0 | 6/26/2010 13:46:01 | 24.9673 |
| 6/25/2010 16:22:01 | 23.864 | 9/15/2010 08:05:00 | 25.0 | 6/26/2010 14:06:01 | 24.9673 |
| 6/25/2010 16:42:01 | 23.864 | 9/15/2010 08:40:00 | 25.0 | 6/26/2010 14:26:01 | 24.9673 |
| 6/25/2010 17:02:01 | 23.864 | 9/15/2010 09:15:00 | 25.0 | 6/26/2010 14:46:01 | 24.9043 |
| 6/25/2010 17:22:01 | 23.926 | 9/15/2010 09:50:00 | 24.5 | 6/26/2010 15:06:01 | 24.9043 |
| 6/25/2010 17:42:01 | 23.926 | 9/15/2010 10:25:00 | 24.5 | 6/26/2010 15:26:01 | 24.9043 |
| 6/25/2010 18:02:01 | 23.926 | 9/15/2010 11:00:00 | 24.5 | 6/26/2010 15:46:01 | 24.9043 |
| 6/25/2010 18:22:01 | 23.989 | 9/15/2010 11:35:00 | 24.5 | 6/26/2010 16:06:01 | 24.9043 |
| 6/25/2010 18:42:01 | 23.989 | 9/15/2010 12:10:00 | 24.5 | 6/26/2010 16:26:01 | 24.9043 |
| 6/25/2010 19:02:01 | 24.051 | 9/15/2010 12:45:00 | 24.5 | 6/26/2010 16:46:01 | 24.9043 |
| 6/25/2010 19:22:01 | 24.051 | 9/15/2010 13:20:00 | 25.0 | 6/26/2010 17:06:01 | 24.9043 |
| 6/25/2010 19:42:01 | 24.051 | 9/15/2010 13:55:00 | 25.0 | 6/26/2010 17:26:01 | 24.9043 |
| 6/25/2010 20:02:01 | 24.051 | 9/15/2010 14:30:00 | 25.0 | 6/26/2010 17:46:01 | 24.9043 |
| 6/25/2010 20:22:01 | 24.114 | 9/15/2010 15:05:00 | 25.0 | 6/26/2010 18:06:01 | 24.9043 |
| 6/25/2010 20:42:01 | 24.114 | 9/15/2010 15:40:00 | 25.0 | 6/26/2010 18:26:01 | 24.9673 |
| 6/25/2010 21:02:01 | 24.114 | 9/15/2010 16:15:00 | 25.0 | 6/26/2010 18:46:01 | 24.9673 |
| 6/25/2010 21:22:01 | 24.114 | 9/15/2010 16:50:00 | 25.0 | 6/26/2010 19:06:01 | 24.9673 |
| 6/25/2010 21:42:01 | 24.176 | 9/15/2010 17:25:00 | 25.0 | 6/26/2010 19:26:01 | 24.9673 |
| 6/25/2010 22:02:01 | 24.176 | 9/15/2010 18:00:00 | 25.0 | 6/26/2010 19:46:01 | 24.9673 |
| 6/25/2010 22:22:01 | 24.176 | 9/15/2010 18:35:00 | 25.5 | 6/26/2010 20:06:01 | 24.9673 |
| 6/25/2010 22:42:01 | 24.176 | 9/15/2010 19:10:00 | 25.5 | 6/26/2010 20:26:01 | 25.0293 |
| 6/25/2010 23:02:01 | 24.176 | 9/15/2010 19:45:00 | 25.5 | 6/26/2010 20:46:01 | 25.0293 |
| 6/25/2010 23:22:01 | 24.176 | 9/15/2010 20:20:00 | 25.5 | 6/26/2010 21:06:01 | 25.0293 |
| 6/25/2010 23:42:01 | 24.176 | 9/15/2010 20:55:00 | 25.5 | 6/26/2010 21:26:01 | 25.0293 |
| 6/26/2010 00:02:01 | 24.176 | 9/15/2010 21:30:00 | 25.5 | 6/26/2010 21:46:01 | 25.0293 |
| 6/26/2010 00:22:01 | 24.176 | 9/15/2010 22:05:00 | 25.5 | 6/26/2010 22:06:01 | 25.0293 |
| 6/26/2010 00:42:01 | 24.176 | 9/15/2010 22:40:00 | 25.5 | 6/26/2010 22:26:01 | 25.0913 |
| 6/26/2010 01:02:01 | 24.114 | 9/15/2010 23:15:00 | 25.5 | 6/26/2010 22:46:01 | 25.0913 |
| 6/26/2010 01:22:01 | 24.114 | 9/15/2010 23:50:00 | 25.5 | 6/26/2010 23:06:01 | 25.0913 |
| 6/26/2010 01:42:01 | 24.114 | 9/16/2010 00:25:00 | 25.5 | 6/26/2010 23:26:01 | 25.0913 |
| 6/26/2010 02:02:01 | 24.114 | 9/16/2010 01:00:00 | 25.0 | 6/26/2010 23:46:01 | 25.0913 |
| 6/26/2010 02:22:01 | 24.114 | 9/16/2010 01:35:00 | 25.0 | 6/27/2010 00:06:01 | 25.1543 |
| 6/26/2010 02:42:01 | 24.114 | 9/16/2010 02:10:00 | 25.0 | 6/27/2010 00:26:01 | 25.1543 |
| 6/26/2010 03:02:01 | 24.114 | 9/16/2010 02:45:00 | 25.0 | 6/27/2010 00:46:01 | 25.1543 |
| 6/26/2010 03:22:01 | 24.051 | 9/16/2010 03:20:00 | 25.0 | 6/27/2010 01:06:01 | 25.1543 |
| 6/26/2010 03:42:01 | 24.051 | 9/16/2010 03:55:00 | 25.0 | 6/27/2010 01:26:01 | 25.1543 |
| 6/26/2010 04:02:01 | 24.051 | 9/16/2010 04:30:00 | 25.0 | 6/27/2010 01:46:01 | 25.1543 |
| 6/26/2010 04:22:01 | 24.051 | 9/16/2010 05:05:00 | 25.0 | 6/27/2010 02:06:01 | 25.1543 |
| 6/26/2010 04:42:01 | 23.989 | 9/16/2010 05:40:00 | 25.0 | 6/27/2010 02:26:01 | 25.1543 |
| 6/26/2010 05:02:01 | 23.989 | 9/16/2010 06:15:00 | 25.0 | 6/27/2010 02:46:01 | 25.2163 |

|                    |        |                    |      |                    |         |
|--------------------|--------|--------------------|------|--------------------|---------|
| 6/26/2010 05:22:01 | 23.989 | 9/16/2010 06:50:00 | 25.0 | 6/27/2010 03:06:01 | 25.2163 |
| 6/26/2010 05:42:01 | 23.989 | 9/16/2010 07:25:00 | 25.0 | 6/27/2010 03:26:01 | 25.2163 |
| 6/26/2010 06:02:01 | 23.989 | 9/16/2010 08:00:00 | 25.0 | 6/27/2010 03:46:01 | 25.2163 |
| 6/26/2010 06:22:01 | 23.926 | 9/16/2010 08:35:00 | 24.5 | 6/27/2010 04:06:01 | 25.2163 |
| 6/26/2010 06:42:01 | 23.926 | 9/16/2010 09:10:00 | 24.5 | 6/27/2010 04:26:01 | 25.2163 |
| 6/26/2010 07:02:01 | 23.926 | 9/16/2010 09:45:00 | 24.5 | 6/27/2010 04:46:01 | 25.2163 |
| 6/26/2010 07:22:01 | 23.926 | 9/16/2010 10:20:00 | 24.5 | 6/27/2010 05:06:01 | 25.2163 |
| 6/26/2010 07:42:01 | 23.864 | 9/16/2010 10:55:00 | 24.5 | 6/27/2010 05:26:01 | 25.2163 |
| 6/26/2010 08:02:01 | 23.864 | 9/16/2010 11:30:00 | 24.5 | 6/27/2010 05:46:01 | 25.2163 |
| 6/26/2010 08:22:01 | 23.864 | 9/16/2010 12:05:00 | 24.5 | 6/27/2010 06:06:01 | 25.2163 |
| 6/26/2010 08:42:01 | 23.864 | 9/16/2010 12:40:00 | 24.5 | 6/27/2010 06:26:01 | 25.2163 |
| 6/26/2010 09:02:01 | 23.801 | 9/16/2010 13:15:00 | 24.5 | 6/27/2010 06:46:01 | 25.2163 |
| 6/26/2010 09:22:01 | 23.801 | 9/16/2010 13:50:00 | 24.5 | 6/27/2010 07:06:01 | 25.2163 |
| 6/26/2010 09:42:01 | 23.801 | 9/16/2010 14:25:00 | 25.0 | 6/27/2010 07:26:01 | 25.2163 |
| 6/26/2010 10:02:01 | 23.739 | 9/16/2010 15:00:00 | 25.0 | 6/27/2010 07:46:01 | 25.2163 |
| 6/26/2010 10:22:01 | 23.739 | 9/16/2010 15:35:00 | 25.0 | 6/27/2010 08:06:01 | 25.2163 |
| 6/26/2010 10:42:01 | 23.739 | 9/16/2010 16:10:00 | 25.0 | 6/27/2010 08:26:01 | 25.2163 |
| 6/26/2010 11:02:01 | 23.739 | 9/16/2010 16:45:00 | 25.0 | 6/27/2010 08:46:01 | 25.2163 |
| 6/26/2010 11:22:01 | 23.739 | 9/16/2010 17:20:00 | 25.0 | 6/27/2010 09:06:01 | 25.2163 |
| 6/26/2010 11:42:01 | 23.676 | 9/16/2010 17:55:00 | 25.0 | 6/27/2010 09:26:01 | 25.2163 |
| 6/26/2010 12:02:01 | 23.676 | 9/16/2010 18:30:00 | 25.0 | 6/27/2010 09:46:01 | 25.2163 |
| 6/26/2010 12:22:01 | 23.676 | 9/16/2010 19:05:00 | 25.5 | 6/27/2010 10:06:01 | 25.2163 |
| 6/26/2010 12:42:01 | 23.676 | 9/16/2010 19:40:00 | 25.5 | 6/27/2010 10:26:01 | 25.2163 |
| 6/26/2010 13:02:01 | 23.676 | 9/16/2010 20:15:00 | 25.5 | 6/27/2010 10:46:01 | 25.2163 |
| 6/26/2010 13:22:01 | 23.676 | 9/16/2010 20:50:00 | 25.5 | 6/27/2010 11:06:01 | 25.2163 |
| 6/26/2010 13:42:01 | 23.676 | 9/16/2010 21:25:00 | 25.5 | 6/27/2010 11:26:01 | 25.2163 |
| 6/26/2010 14:02:01 | 23.676 | 9/16/2010 22:00:00 | 25.5 | 6/27/2010 11:46:01 | 25.2163 |
| 6/26/2010 14:22:01 | 23.676 | 9/16/2010 22:35:00 | 25.5 | 6/27/2010 12:06:01 | 25.1543 |
| 6/26/2010 14:42:01 | 23.676 | 9/16/2010 23:10:00 | 25.5 | 6/27/2010 12:26:01 | 25.1543 |
| 6/26/2010 15:02:01 | 23.739 | 9/16/2010 23:45:00 | 25.5 | 6/27/2010 12:46:01 | 25.1543 |
| 6/26/2010 15:22:01 | 23.739 | 9/17/2010 00:20:00 | 25.0 | 6/27/2010 13:06:01 | 25.1543 |
| 6/26/2010 15:42:01 | 23.739 | 9/17/2010 00:55:00 | 25.0 | 6/27/2010 13:26:01 | 25.1543 |
| 6/26/2010 16:02:01 | 23.739 | 9/17/2010 01:30:00 | 25.0 | 6/27/2010 13:46:01 | 25.1543 |
| 6/26/2010 16:22:01 | 23.801 | 9/17/2010 02:05:00 | 25.0 | 6/27/2010 14:06:01 | 25.1543 |
| 6/26/2010 16:42:01 | 23.801 | 9/17/2010 02:40:00 | 25.0 | 6/27/2010 14:26:01 | 25.1543 |
| 6/26/2010 17:02:01 | 23.864 | 9/17/2010 03:15:00 | 25.0 | 6/27/2010 14:46:01 | 25.1543 |
| 6/26/2010 17:22:01 | 23.864 | 9/17/2010 03:50:00 | 25.0 | 6/27/2010 15:06:01 | 25.1543 |
| 6/26/2010 17:42:01 | 23.926 | 9/17/2010 04:25:00 | 25.0 | 6/27/2010 15:26:01 | 25.1543 |
| 6/26/2010 18:02:01 | 23.926 | 9/17/2010 05:00:00 | 25.0 | 6/27/2010 15:46:01 | 25.1543 |
| 6/26/2010 18:22:01 | 23.989 | 9/17/2010 05:35:00 | 25.0 | 6/27/2010 16:06:01 | 25.1543 |
| 6/26/2010 18:42:01 | 23.989 | 9/17/2010 06:10:00 | 24.5 | 6/27/2010 16:26:01 | 25.1543 |
| 6/26/2010 19:02:01 | 24.051 | 9/17/2010 06:45:00 | 24.5 | 6/27/2010 16:46:01 | 25.1543 |
| 6/26/2010 19:22:01 | 24.051 | 9/17/2010 07:20:00 | 24.5 | 6/27/2010 17:06:01 | 25.1543 |
| 6/26/2010 19:42:01 | 24.051 | 9/17/2010 07:55:00 | 24.5 | 6/27/2010 17:26:01 | 25.1543 |
| 6/26/2010 20:02:01 | 24.114 | 9/17/2010 08:30:00 | 24.5 | 6/27/2010 17:46:01 | 25.2163 |
| 6/26/2010 20:22:01 | 24.114 | 9/17/2010 09:05:00 | 24.5 | 6/27/2010 18:06:01 | 25.2163 |
| 6/26/2010 20:42:01 | 24.114 | 9/17/2010 09:40:00 | 24.5 | 6/27/2010 18:26:01 | 25.2163 |
| 6/26/2010 21:02:01 | 24.176 | 9/17/2010 10:15:00 | 24.5 | 6/27/2010 18:46:01 | 25.2163 |
| 6/26/2010 21:22:01 | 24.176 | 9/17/2010 10:50:00 | 24.5 | 6/27/2010 19:06:01 | 25.2163 |
| 6/26/2010 21:42:01 | 24.176 | 9/17/2010 11:25:00 | 24.5 | 6/27/2010 19:26:01 | 25.2163 |

|                    |                           |                         |         |
|--------------------|---------------------------|-------------------------|---------|
| 6/26/2010 22:02:01 | 24.239 9/17/2010 12:00:00 | 24.5 6/27/2010 19:46:01 | 25.2793 |
| 6/26/2010 22:22:01 | 24.239 9/17/2010 12:35:00 | 24.5 6/27/2010 20:06:01 | 25.2793 |
| 6/26/2010 22:42:01 | 24.239 9/17/2010 13:10:00 | 24.5 6/27/2010 20:26:01 | 25.2793 |
| 6/26/2010 23:02:01 | 24.239 9/17/2010 13:45:00 | 24.5 6/27/2010 20:46:01 | 25.2793 |
| 6/26/2010 23:22:01 | 24.239 9/17/2010 14:20:00 | 24.5 6/27/2010 21:06:01 | 25.2793 |
| 6/26/2010 23:42:01 | 24.239 9/17/2010 14:55:00 | 24.5 6/27/2010 21:26:01 | 25.3413 |
| 6/27/2010 00:02:01 | 24.239 9/17/2010 15:30:00 | 24.5 6/27/2010 21:46:01 | 25.3413 |
| 6/27/2010 00:22:01 | 24.239 9/17/2010 16:05:00 | 25.0 6/27/2010 22:06:01 | 25.3413 |
| 6/27/2010 00:42:01 | 24.239 9/17/2010 16:40:00 | 25.0 6/27/2010 22:26:01 | 25.3413 |
| 6/27/2010 01:02:01 | 24.239 9/17/2010 17:15:00 | 25.0 6/27/2010 22:46:01 | 25.3413 |
| 6/27/2010 01:22:01 | 24.239 9/17/2010 17:50:00 | 25.0 6/27/2010 23:06:01 | 25.4043 |
| 6/27/2010 01:42:01 | 24.239 9/17/2010 18:25:00 | 25.0 6/27/2010 23:26:01 | 25.4043 |
| 6/27/2010 02:02:01 | 24.301 9/17/2010 19:00:00 | 25.0 6/27/2010 23:46:01 | 25.4043 |
| 6/27/2010 02:22:01 | 24.301 9/17/2010 19:35:00 | 25.5 6/28/2010 00:06:01 | 25.4043 |
| 6/27/2010 02:42:01 | 24.239 9/17/2010 20:10:00 | 25.5 6/28/2010 00:26:01 | 25.4043 |
| 6/27/2010 03:02:01 | 24.239 9/17/2010 20:45:00 | 25.5 6/28/2010 00:46:01 | 25.4043 |
| 6/27/2010 03:22:01 | 24.239 9/17/2010 21:20:00 | 25.5 6/28/2010 01:06:01 | 25.4663 |
| 6/27/2010 03:42:01 | 24.239 9/17/2010 21:55:00 | 25.5 6/28/2010 01:26:01 | 25.4663 |
| 6/27/2010 04:02:01 | 24.239 9/17/2010 22:30:00 | 25.5 6/28/2010 01:46:01 | 25.4663 |
| 6/27/2010 04:22:01 | 24.239 9/17/2010 23:05:00 | 25.5 6/28/2010 02:06:01 | 25.4663 |
| 6/27/2010 04:42:01 | 24.239 9/17/2010 23:40:00 | 25.5 6/28/2010 02:26:01 | 25.4663 |
| 6/27/2010 05:02:01 | 24.239 9/18/2010 00:15:00 | 25.5 6/28/2010 02:46:01 | 25.4663 |
| 6/27/2010 05:22:01 | 24.239 9/18/2010 00:50:00 | 25.5 6/28/2010 03:06:01 | 25.4663 |
| 6/27/2010 05:42:01 | 24.239 9/18/2010 01:25:00 | 25.5 6/28/2010 03:26:01 | 25.4663 |
| 6/27/2010 06:02:01 | 24.239 9/18/2010 02:00:00 | 25.5 6/28/2010 03:46:01 | 25.4663 |
| 6/27/2010 06:22:01 | 24.239 9/18/2010 02:35:00 | 25.5 6/28/2010 04:06:01 | 25.4663 |
| 6/27/2010 06:42:01 | 24.239 9/18/2010 03:10:00 | 25.5 6/28/2010 04:26:01 | 25.4663 |
| 6/27/2010 07:02:01 | 24.239 9/18/2010 03:45:00 | 25.5 6/28/2010 04:46:01 | 25.4663 |
| 6/27/2010 07:22:01 | 24.239 9/18/2010 04:20:00 | 25.5 6/28/2010 05:06:01 | 25.4663 |
| 6/27/2010 07:42:01 | 24.239 9/18/2010 04:55:00 | 25.5 6/28/2010 05:26:01 | 25.4663 |
| 6/27/2010 08:02:01 | 24.176 9/18/2010 05:30:00 | 25.0 6/28/2010 05:46:01 | 25.4663 |
| 6/27/2010 08:22:01 | 24.176 9/18/2010 06:05:00 | 25.0 6/28/2010 06:06:01 | 25.4663 |
| 6/27/2010 08:42:01 | 24.176 9/18/2010 06:40:00 | 25.0 6/28/2010 06:26:01 | 25.4663 |
| 6/27/2010 09:02:01 | 24.176 9/18/2010 07:15:00 | 25.0 6/28/2010 06:46:01 | 25.4663 |
| 6/27/2010 09:22:01 | 24.176 9/18/2010 07:50:00 | 25.0 6/28/2010 07:06:01 | 25.4663 |
| 6/27/2010 09:42:01 | 24.176 9/18/2010 08:25:00 | 25.0 6/28/2010 07:26:01 | 25.4663 |
| 6/27/2010 10:02:01 | 24.176 9/18/2010 09:00:00 | 25.0 6/28/2010 07:46:01 | 25.4663 |
| 6/27/2010 10:22:01 | 24.176 9/18/2010 09:35:00 | 25.0 6/28/2010 08:06:01 | 25.4663 |
| 6/27/2010 10:42:01 | 24.114 9/18/2010 10:10:00 | 25.0 6/28/2010 08:26:01 | 25.4663 |
| 6/27/2010 11:02:01 | 24.114 9/18/2010 10:45:00 | 25.0 6/28/2010 08:46:01 | 25.4663 |
| 6/27/2010 11:22:01 | 24.114 9/18/2010 11:20:00 | 25.0 6/28/2010 09:06:01 | 25.4663 |
| 6/27/2010 11:42:01 | 24.114 9/18/2010 11:55:00 | 25.0 6/28/2010 09:26:01 | 25.4663 |
| 6/27/2010 12:02:01 | 24.114 9/18/2010 12:30:00 | 25.0 6/28/2010 09:46:01 | 25.4043 |
| 6/27/2010 12:22:01 | 24.114 9/18/2010 13:05:00 | 25.0 6/28/2010 10:06:01 | 25.4043 |
| 6/27/2010 12:42:01 | 24.114 9/18/2010 13:40:00 | 25.0 6/28/2010 10:26:01 | 25.4043 |
| 6/27/2010 13:02:01 | 24.114 9/18/2010 14:15:00 | 25.0 6/28/2010 10:46:01 | 25.4043 |
| 6/27/2010 13:22:01 | 24.114 9/18/2010 14:50:00 | 25.0 6/28/2010 11:06:01 | 25.4043 |
| 6/27/2010 13:42:01 | 24.114 9/18/2010 15:25:00 | 25.0 6/28/2010 11:26:01 | 25.4043 |
| 6/27/2010 14:02:01 | 24.114 9/18/2010 16:00:00 | 25.5 6/28/2010 11:46:01 | 25.4043 |
| 6/27/2010 14:22:01 | 24.114 9/18/2010 16:35:00 | 25.5 6/28/2010 12:06:01 | 25.4043 |

|                    |        |                    |      |                    |         |
|--------------------|--------|--------------------|------|--------------------|---------|
| 6/27/2010 14:42:01 | 24.114 | 9/18/2010 17:10:00 | 25.5 | 6/28/2010 12:26:01 | 25.3413 |
| 6/27/2010 15:02:01 | 24.176 | 9/18/2010 17:45:00 | 25.5 | 6/28/2010 12:46:01 | 25.3413 |
| 6/27/2010 15:22:01 | 24.176 | 9/18/2010 18:20:00 | 25.5 | 6/28/2010 13:06:01 | 25.3413 |
| 6/27/2010 15:42:01 | 24.239 | 9/18/2010 18:55:00 | 25.5 | 6/28/2010 13:26:01 | 25.3413 |
| 6/27/2010 16:02:01 | 24.239 | 9/18/2010 19:30:00 | 25.5 | 6/28/2010 13:46:01 | 25.3413 |
| 6/27/2010 16:22:01 | 24.239 | 9/18/2010 20:05:00 | 25.5 | 6/28/2010 14:06:01 | 25.3413 |
| 6/27/2010 16:42:01 | 24.301 | 9/18/2010 20:40:00 | 26.0 | 6/28/2010 14:26:01 | 25.3413 |
| 6/27/2010 17:02:01 | 24.301 | 9/18/2010 21:15:00 | 26.0 | 6/28/2010 14:46:01 | 25.3413 |
| 6/27/2010 17:22:01 | 24.364 | 9/18/2010 21:50:00 | 26.0 | 6/28/2010 15:06:01 | 25.3413 |
| 6/27/2010 17:42:01 | 24.364 | 9/18/2010 22:25:00 | 26.0 | 6/28/2010 15:26:01 | 25.3413 |
| 6/27/2010 18:02:01 | 24.426 | 9/18/2010 23:00:00 | 25.5 | 6/28/2010 15:46:01 | 25.3413 |
| 6/27/2010 18:22:01 | 24.426 | 9/18/2010 23:35:00 | 25.5 | 6/28/2010 16:06:01 | 25.3413 |
| 6/27/2010 18:42:01 | 24.489 | 9/19/2010 00:10:00 | 25.5 | 6/28/2010 16:26:01 | 25.3413 |
| 6/27/2010 19:02:01 | 24.489 | 9/19/2010 00:45:00 | 25.5 | 6/28/2010 16:46:01 | 25.3413 |
| 6/27/2010 19:22:01 | 24.489 | 9/19/2010 01:20:00 | 25.5 | 6/28/2010 17:06:01 | 25.3413 |
| 6/27/2010 19:42:01 | 24.551 | 9/19/2010 01:55:00 | 25.5 | 6/28/2010 17:26:01 | 25.3413 |
| 6/27/2010 20:02:01 | 24.551 | 9/19/2010 02:30:00 | 25.5 | 6/28/2010 17:46:01 | 25.3413 |
| 6/27/2010 20:22:01 | 24.614 | 9/19/2010 03:05:00 | 25.5 | 6/28/2010 18:06:01 | 25.3413 |
| 6/27/2010 20:42:01 | 24.614 | 9/19/2010 03:40:00 | 25.5 | 6/28/2010 18:26:01 | 25.3413 |
| 6/27/2010 21:02:01 | 24.614 | 9/19/2010 04:15:00 | 25.5 | 6/28/2010 18:46:01 | 25.3413 |
| 6/27/2010 21:22:01 | 24.614 | 9/19/2010 04:50:00 | 25.5 | 6/28/2010 19:06:01 | 25.3413 |
| 6/27/2010 21:42:01 | 24.614 | 9/19/2010 05:25:00 | 25.5 | 6/28/2010 19:26:01 | 25.3413 |
| 6/27/2010 22:02:01 | 24.614 | 9/19/2010 06:00:00 | 25.5 | 6/28/2010 19:46:01 | 25.3413 |
| 6/27/2010 22:22:01 | 24.676 | 9/19/2010 06:35:00 | 25.0 | 6/28/2010 20:06:01 | 25.3413 |
| 6/27/2010 22:42:01 | 24.676 | 9/19/2010 07:10:00 | 25.0 | 6/28/2010 20:26:01 | 25.4043 |
| 6/27/2010 23:02:01 | 24.676 | 9/19/2010 07:45:00 | 25.0 | 6/28/2010 20:46:01 | 25.4043 |
| 6/27/2010 23:22:01 | 24.676 | 9/19/2010 08:20:00 | 25.0 | 6/28/2010 21:06:01 | 25.4043 |
| 6/27/2010 23:42:01 | 24.676 | 9/19/2010 08:55:00 | 25.0 | 6/28/2010 21:26:01 | 25.4043 |
| 6/28/2010 00:02:01 | 24.676 | 9/19/2010 09:30:00 | 25.0 | 6/28/2010 21:46:01 | 25.4043 |
| 6/28/2010 00:22:01 | 24.676 | 9/19/2010 10:05:00 | 25.0 | 6/28/2010 22:06:01 | 25.4043 |
| 6/28/2010 00:42:01 | 24.676 | 9/19/2010 10:40:00 | 25.0 | 6/28/2010 22:26:01 | 25.4043 |
| 6/28/2010 01:02:01 | 24.676 | 9/19/2010 11:15:00 | 25.0 | 6/28/2010 22:46:01 | 25.4663 |
| 6/28/2010 01:22:01 | 24.676 | 9/19/2010 11:50:00 | 25.0 | 6/28/2010 23:06:01 | 25.4663 |
| 6/28/2010 01:42:01 | 24.676 | 9/19/2010 12:25:00 | 25.0 | 6/28/2010 23:26:01 | 25.4663 |
| 6/28/2010 02:02:01 | 24.614 | 9/19/2010 13:00:00 | 25.0 | 6/28/2010 23:46:01 | 25.4663 |
| 6/28/2010 02:22:01 | 24.614 | 9/19/2010 13:35:00 | 25.0 | 6/29/2010 00:06:01 | 25.4663 |
| 6/28/2010 02:42:01 | 24.614 | 9/19/2010 14:10:00 | 25.0 | 6/29/2010 00:26:01 | 25.4663 |
| 6/28/2010 03:02:01 | 24.614 | 9/19/2010 14:45:00 | 25.0 | 6/29/2010 00:46:01 | 25.4663 |
| 6/28/2010 03:22:01 | 24.614 | 9/19/2010 15:20:00 | 25.5 | 6/29/2010 01:06:01 | 25.4663 |
| 6/28/2010 03:42:01 | 24.551 | 9/19/2010 15:55:00 | 25.5 | 6/29/2010 01:26:01 | 25.4663 |
| 6/28/2010 04:02:01 | 24.551 | 9/19/2010 16:30:00 | 25.5 | 6/29/2010 01:46:01 | 25.4663 |
| 6/28/2010 04:22:01 | 24.551 | 9/19/2010 17:05:00 | 25.5 | 6/29/2010 02:06:01 | 25.4663 |
| 6/28/2010 04:42:01 | 24.551 | 9/19/2010 17:40:00 | 25.5 | 6/29/2010 02:26:01 | 25.4663 |
| 6/28/2010 05:02:01 | 24.551 | 9/19/2010 18:15:00 | 25.5 | 6/29/2010 02:46:01 | 25.4663 |
| 6/28/2010 05:22:01 | 24.551 | 9/19/2010 18:50:00 | 25.5 | 6/29/2010 03:06:01 | 25.4663 |
| 6/28/2010 05:42:01 | 24.489 | 9/19/2010 19:25:00 | 25.5 | 6/29/2010 03:26:01 | 25.4663 |
| 6/28/2010 06:02:01 | 24.489 | 9/19/2010 20:00:00 | 26.0 | 6/29/2010 03:46:01 | 25.4663 |
| 6/28/2010 06:22:01 | 24.489 | 9/19/2010 20:35:00 | 26.0 | 6/29/2010 04:06:01 | 25.4663 |
| 6/28/2010 06:42:01 | 24.426 | 9/19/2010 21:10:00 | 26.0 | 6/29/2010 04:26:01 | 25.4663 |
| 6/28/2010 07:02:01 | 24.426 | 9/19/2010 21:45:00 | 26.0 | 6/29/2010 04:46:01 | 25.4663 |

|                    |        |                    |      |                    |         |
|--------------------|--------|--------------------|------|--------------------|---------|
| 6/28/2010 07:22:01 | 24.426 | 9/19/2010 22:20:00 | 26.0 | 6/29/2010 05:06:01 | 25.4663 |
| 6/28/2010 07:42:01 | 24.426 | 9/19/2010 22:55:00 | 26.0 | 6/29/2010 05:26:01 | 25.4663 |
| 6/28/2010 08:02:01 | 24.426 | 9/19/2010 23:30:00 | 26.0 | 6/29/2010 05:46:01 | 25.4663 |
| 6/28/2010 08:22:01 | 24.364 | 9/20/2010 00:05:00 | 25.5 | 6/29/2010 06:06:01 | 25.4663 |
| 6/28/2010 08:42:01 | 24.364 | 9/20/2010 00:40:00 | 25.5 | 6/29/2010 06:26:01 | 25.4663 |
| 6/28/2010 09:02:01 | 24.364 | 9/20/2010 01:15:00 | 25.5 | 6/29/2010 06:46:01 | 25.4663 |
| 6/28/2010 09:22:01 | 24.364 | 9/20/2010 01:50:00 | 25.5 | 6/29/2010 07:06:01 | 25.4663 |
| 6/28/2010 09:42:01 | 24.301 | 9/20/2010 02:25:00 | 25.5 | 6/29/2010 07:26:01 | 25.4663 |
| 6/28/2010 10:02:01 | 24.301 | 9/20/2010 03:00:00 | 25.5 | 6/29/2010 07:46:01 | 25.4043 |
| 6/28/2010 10:22:01 | 24.301 | 9/20/2010 03:35:00 | 25.5 | 6/29/2010 08:06:01 | 25.4043 |
| 6/28/2010 10:42:01 | 24.301 | 9/20/2010 04:10:00 | 25.5 | 6/29/2010 08:26:01 | 25.4043 |
| 6/28/2010 11:02:01 | 24.239 | 9/20/2010 04:45:00 | 25.5 | 6/29/2010 08:46:01 | 25.4043 |
| 6/28/2010 11:22:01 | 24.239 | 9/20/2010 05:20:00 | 25.5 | 6/29/2010 09:06:01 | 25.4043 |
| 6/28/2010 11:42:01 | 24.239 | 9/20/2010 05:55:00 | 25.5 | 6/29/2010 09:26:01 | 25.4043 |
| 6/28/2010 12:02:01 | 24.239 | 9/20/2010 06:30:00 | 25.0 | 6/29/2010 09:46:01 | 25.4043 |
| 6/28/2010 12:22:01 | 24.239 | 9/20/2010 07:05:00 | 25.0 | 6/29/2010 10:06:01 | 25.3413 |
| 6/28/2010 12:42:01 | 24.239 | 9/20/2010 07:40:00 | 25.0 | 6/29/2010 10:26:01 | 25.3413 |
| 6/28/2010 13:02:01 | 24.239 | 9/20/2010 08:15:00 | 25.0 | 6/29/2010 10:46:01 | 25.3413 |
| 6/28/2010 13:22:01 | 24.239 | 9/20/2010 08:50:00 | 25.0 | 6/29/2010 11:06:01 | 25.3413 |
| 6/28/2010 13:42:01 | 24.239 | 9/20/2010 09:25:00 | 25.0 | 6/29/2010 11:26:01 | 25.3413 |
| 6/28/2010 14:02:01 | 24.239 | 9/20/2010 10:00:00 | 25.0 | 6/29/2010 11:46:01 | 25.3413 |
| 6/28/2010 14:22:01 | 24.239 | 9/20/2010 10:35:00 | 25.0 | 6/29/2010 12:06:01 | 25.3413 |
| 6/28/2010 14:42:01 | 24.239 | 9/20/2010 11:10:00 | 25.0 | 6/29/2010 12:26:01 | 25.2793 |
| 6/28/2010 15:02:01 | 24.239 | 9/20/2010 11:45:00 | 25.0 | 6/29/2010 12:46:01 | 25.2793 |
| 6/28/2010 15:22:01 | 24.239 | 9/20/2010 12:20:00 | 25.0 | 6/29/2010 13:06:01 | 25.2793 |
| 6/28/2010 15:42:01 | 24.239 | 9/20/2010 12:55:00 | 25.0 | 6/29/2010 13:26:01 | 25.2793 |
| 6/28/2010 16:02:01 | 24.239 | 9/20/2010 13:30:00 | 25.0 | 6/29/2010 13:46:01 | 25.2793 |
| 6/28/2010 16:22:01 | 24.301 | 9/20/2010 14:05:00 | 25.0 | 6/29/2010 14:06:01 | 25.2793 |
| 6/28/2010 16:42:01 | 24.301 | 9/20/2010 14:40:00 | 25.0 | 6/29/2010 14:26:01 | 25.2793 |
| 6/28/2010 17:02:01 | 24.301 | 9/20/2010 15:15:00 | 25.0 | 6/29/2010 14:46:01 | 25.2163 |
| 6/28/2010 17:22:01 | 24.301 | 9/20/2010 15:50:00 | 25.5 | 6/29/2010 15:06:01 | 25.2163 |
| 6/28/2010 17:42:01 | 24.364 | 9/20/2010 16:25:00 | 25.5 | 6/29/2010 15:26:01 | 25.2163 |
| 6/28/2010 18:02:01 | 24.364 | 9/20/2010 17:00:00 | 25.5 | 6/29/2010 15:46:01 | 25.2163 |
| 6/28/2010 18:22:01 | 24.364 | 9/20/2010 17:35:00 | 25.5 | 6/29/2010 16:06:01 | 25.2163 |
| 6/28/2010 18:42:01 | 24.426 | 9/20/2010 18:10:00 | 25.5 | 6/29/2010 16:26:01 | 25.2163 |
| 6/28/2010 19:02:01 | 24.426 | 9/20/2010 18:45:00 | 25.5 | 6/29/2010 16:46:01 | 25.2163 |
| 6/28/2010 19:22:01 | 24.426 | 9/20/2010 19:20:00 | 25.5 | 6/29/2010 17:06:01 | 25.2163 |
| 6/28/2010 19:42:01 | 24.426 | 9/20/2010 19:55:00 | 25.5 | 6/29/2010 17:26:01 | 25.2163 |
| 6/28/2010 20:02:01 | 24.489 | 9/20/2010 20:30:00 | 25.5 | 6/29/2010 17:46:01 | 25.2163 |
| 6/28/2010 20:22:01 | 24.489 | 9/20/2010 21:05:00 | 25.5 | 6/29/2010 18:06:01 | 25.2793 |
| 6/28/2010 20:42:01 | 24.489 | 9/20/2010 21:40:00 | 25.5 | 6/29/2010 18:26:01 | 25.2163 |
| 6/28/2010 21:02:01 | 24.489 | 9/20/2010 22:15:00 | 25.5 | 6/29/2010 18:46:01 | 25.2793 |
| 6/28/2010 21:22:01 | 24.489 | 9/20/2010 22:50:00 | 25.5 | 6/29/2010 19:06:01 | 25.2793 |
| 6/28/2010 21:42:01 | 24.489 | 9/20/2010 23:25:00 | 25.5 | 6/29/2010 19:26:01 | 25.2793 |
| 6/28/2010 22:02:01 | 24.489 | 9/21/2010 00:00:00 | 25.5 | 6/29/2010 19:46:01 | 25.2793 |
| 6/28/2010 22:22:01 | 24.489 | 9/21/2010 00:35:00 | 25.5 | 6/29/2010 20:06:01 | 25.2793 |
| 6/28/2010 22:42:01 | 24.489 | 9/21/2010 01:10:00 | 25.5 | 6/29/2010 20:26:01 | 25.2793 |
| 6/28/2010 23:02:01 | 24.489 | 9/21/2010 01:45:00 | 25.5 | 6/29/2010 20:46:01 | 25.2793 |
| 6/28/2010 23:22:01 | 24.489 | 9/21/2010 02:20:00 | 25.5 | 6/29/2010 21:06:01 | 25.3413 |
| 6/28/2010 23:42:01 | 24.489 | 9/21/2010 02:55:00 | 25.5 | 6/29/2010 21:26:01 | 25.3413 |

|                    |        |                    |      |                    |         |
|--------------------|--------|--------------------|------|--------------------|---------|
| 6/29/2010 00:02:01 | 24.489 | 9/21/2010 03:30:00 | 25.5 | 6/29/2010 21:46:01 | 25.3413 |
| 6/29/2010 00:22:01 | 24.489 | 9/21/2010 04:05:00 | 25.5 | 6/29/2010 22:06:01 | 25.3413 |
| 6/29/2010 00:42:01 | 24.489 | 9/21/2010 04:40:00 | 25.5 | 6/29/2010 22:26:01 | 25.3413 |
| 6/29/2010 01:02:01 | 24.489 | 9/21/2010 05:15:00 | 25.0 | 6/29/2010 22:46:01 | 25.3413 |
| 6/29/2010 01:22:01 | 24.489 | 9/21/2010 05:50:00 | 25.0 | 6/29/2010 23:06:01 | 25.3413 |
| 6/29/2010 01:42:01 | 24.489 | 9/21/2010 06:25:00 | 25.0 | 6/29/2010 23:26:01 | 25.4043 |
| 6/29/2010 02:02:01 | 24.489 | 9/21/2010 07:00:00 | 25.0 | 6/29/2010 23:46:01 | 25.4043 |
| 6/29/2010 02:22:01 | 24.426 | 9/21/2010 07:35:00 | 25.0 | 6/30/2010 00:06:01 | 25.4043 |
| 6/29/2010 02:42:01 | 24.426 | 9/21/2010 08:10:00 | 25.0 | 6/30/2010 00:26:01 | 25.4043 |
| 6/29/2010 03:02:01 | 24.426 | 9/21/2010 08:45:00 | 25.0 | 6/30/2010 00:46:01 | 25.4043 |
| 6/29/2010 03:22:01 | 24.426 | 9/21/2010 09:20:00 | 25.0 | 6/30/2010 01:06:01 | 25.4043 |
| 6/29/2010 03:42:01 | 24.426 | 9/21/2010 09:55:00 | 25.0 | 6/30/2010 01:26:01 | 25.4043 |
| 6/29/2010 04:02:01 | 24.426 | 9/21/2010 10:30:00 | 25.0 | 6/30/2010 01:46:01 | 25.4043 |
| 6/29/2010 04:22:01 | 24.364 | 9/21/2010 11:05:00 | 25.0 | 6/30/2010 02:06:01 | 25.4043 |
| 6/29/2010 04:42:01 | 24.364 | 9/21/2010 11:40:00 | 25.0 | 6/30/2010 02:26:01 | 25.4043 |
| 6/29/2010 05:02:01 | 24.364 | 9/21/2010 12:15:00 | 25.0 | 6/30/2010 02:46:01 | 25.4043 |
| 6/29/2010 05:22:01 | 24.364 | 9/21/2010 12:50:00 | 25.0 | 6/30/2010 03:06:01 | 25.4043 |
| 6/29/2010 05:42:01 | 24.364 | 9/21/2010 13:25:00 | 25.0 | 6/30/2010 03:26:01 | 25.4043 |
| 6/29/2010 06:02:01 | 24.364 | 9/21/2010 14:00:00 | 25.0 | 6/30/2010 03:46:01 | 25.4043 |
| 6/29/2010 06:22:01 | 24.301 | 9/21/2010 14:35:00 | 25.0 | 6/30/2010 04:06:01 | 25.4043 |
| 6/29/2010 06:42:01 | 24.301 | 9/21/2010 15:10:00 | 25.0 | 6/30/2010 04:26:01 | 25.4043 |
| 6/29/2010 07:02:01 | 24.301 | 9/21/2010 15:45:00 | 25.0 | 6/30/2010 04:46:01 | 25.4043 |
| 6/29/2010 07:22:01 | 24.301 | 9/21/2010 16:20:00 | 25.5 | 6/30/2010 05:06:01 | 25.4043 |
| 6/29/2010 07:42:01 | 24.239 | 9/21/2010 16:55:00 | 25.5 | 6/30/2010 05:26:01 | 25.4043 |
| 6/29/2010 08:02:01 | 24.239 | 9/21/2010 17:30:00 | 25.5 | 6/30/2010 05:46:01 | 25.4043 |
| 6/29/2010 08:22:01 | 24.239 | 9/21/2010 18:05:00 | 25.5 | 6/30/2010 06:06:01 | 25.4043 |
| 6/29/2010 08:42:01 | 24.239 | 9/21/2010 18:40:00 | 25.5 | 6/30/2010 06:26:01 | 25.4043 |
| 6/29/2010 09:02:01 | 24.176 | 9/21/2010 19:15:00 | 25.5 | 6/30/2010 06:46:01 | 25.4043 |
| 6/29/2010 09:22:01 | 24.176 | 9/21/2010 19:50:00 | 25.5 | 6/30/2010 07:06:01 | 25.4043 |
| 6/29/2010 09:42:01 | 24.176 | 9/21/2010 20:25:00 | 25.5 | 6/30/2010 07:26:01 | 25.4043 |
| 6/29/2010 10:02:01 | 24.176 | 9/21/2010 21:00:00 | 26.0 | 6/30/2010 07:46:01 | 25.4043 |
| 6/29/2010 10:22:01 | 24.114 | 9/21/2010 21:35:00 | 25.5 | 6/30/2010 08:06:01 | 25.3413 |
| 6/29/2010 10:42:01 | 24.114 | 9/21/2010 22:10:00 | 25.5 | 6/30/2010 08:26:01 | 25.3413 |
| 6/29/2010 11:02:01 | 24.114 | 9/21/2010 22:45:00 | 26.0 | 6/30/2010 08:46:01 | 25.3413 |
| 6/29/2010 11:22:01 | 24.114 | 9/21/2010 23:20:00 | 26.0 | 6/30/2010 09:06:01 | 25.3413 |
| 6/29/2010 11:42:01 | 24.051 | 9/21/2010 23:55:00 | 26.0 | 6/30/2010 09:26:01 | 25.3413 |
| 6/29/2010 12:02:01 | 24.051 | 9/22/2010 00:30:00 | 26.0 | 6/30/2010 09:46:01 | 25.3413 |
| 6/29/2010 12:22:01 | 24.051 | 9/22/2010 01:05:00 | 25.5 | 6/30/2010 10:06:01 | 25.2793 |
| 6/29/2010 12:42:01 | 24.051 | 9/22/2010 01:40:00 | 25.5 | 6/30/2010 10:26:01 | 25.2793 |
| 6/29/2010 13:02:01 | 24.051 | 9/22/2010 02:15:00 | 25.5 | 6/30/2010 10:46:01 | 25.2793 |
| 6/29/2010 13:22:01 | 24.051 | 9/22/2010 02:50:00 | 25.5 | 6/30/2010 11:06:01 | 25.2793 |
| 6/29/2010 13:42:01 | 24.051 | 9/22/2010 03:25:00 | 25.5 | 6/30/2010 11:26:01 | 25.2793 |
| 6/29/2010 14:02:01 | 24.051 | 9/22/2010 04:00:00 | 25.5 | 6/30/2010 11:46:01 | 25.2793 |
| 6/29/2010 14:22:01 | 24.051 | 9/22/2010 04:35:00 | 25.5 | 6/30/2010 12:06:01 | 25.2163 |
| 6/29/2010 14:42:01 | 24.051 | 9/22/2010 05:10:00 | 25.5 | 6/30/2010 12:26:01 | 25.2163 |
| 6/29/2010 15:02:01 | 24.051 | 9/22/2010 05:45:00 | 25.0 | 6/30/2010 12:46:01 | 25.2163 |
| 6/29/2010 15:22:01 | 24.051 | 9/22/2010 06:20:00 | 25.0 | 6/30/2010 13:06:01 | 25.2163 |
| 6/29/2010 15:42:01 | 24.114 | 9/22/2010 06:55:00 | 25.0 | 6/30/2010 13:26:01 | 25.2163 |
| 6/29/2010 16:02:01 | 24.114 | 9/22/2010 07:30:00 | 25.0 | 6/30/2010 13:46:01 | 25.1543 |
| 6/29/2010 16:22:01 | 24.114 | 9/22/2010 08:05:00 | 25.0 | 6/30/2010 14:06:01 | 25.1543 |

|                    |        |                    |      |                    |         |
|--------------------|--------|--------------------|------|--------------------|---------|
| 6/29/2010 16:42:01 | 24.176 | 9/22/2010 08:40:00 | 25.0 | 6/30/2010 14:26:01 | 25.1543 |
| 6/29/2010 17:02:01 | 24.176 | 9/22/2010 09:15:00 | 25.0 | 6/30/2010 14:46:01 | 25.1543 |
| 6/29/2010 17:22:01 | 24.176 | 9/22/2010 09:50:00 | 24.5 | 6/30/2010 15:06:01 | 25.1543 |
| 6/29/2010 17:42:01 | 24.239 | 9/22/2010 10:25:00 | 24.5 | 6/30/2010 15:26:01 | 25.1543 |
| 6/29/2010 18:02:01 | 24.239 | 9/22/2010 11:00:00 | 24.5 | 6/30/2010 15:46:01 | 25.1543 |
| 6/29/2010 18:22:01 | 24.301 | 9/22/2010 11:35:00 | 24.5 | 6/30/2010 16:06:01 | 25.1543 |
| 6/29/2010 18:42:01 | 24.301 | 9/22/2010 12:10:00 | 24.5 | 6/30/2010 16:26:01 | 25.1543 |
| 6/29/2010 19:02:01 | 24.301 | 9/22/2010 12:45:00 | 25.0 | 6/30/2010 16:46:01 | 25.1543 |
| 6/29/2010 19:22:01 | 24.364 | 9/22/2010 13:20:00 | 25.0 | 6/30/2010 17:06:01 | 25.1543 |
| 6/29/2010 19:42:01 | 24.364 | 9/22/2010 13:55:00 | 25.0 | 6/30/2010 17:26:01 | 25.1543 |
| 6/29/2010 20:02:01 | 24.364 | 9/22/2010 14:30:00 | 25.0 | 6/30/2010 17:46:01 | 25.1543 |
| 6/29/2010 20:22:01 | 24.426 | 9/22/2010 15:05:00 | 25.0 | 6/30/2010 18:06:01 | 25.1543 |
| 6/29/2010 20:42:01 | 24.426 | 9/22/2010 15:40:00 | 25.0 | 6/30/2010 18:26:01 | 25.1543 |
| 6/29/2010 21:02:01 | 24.426 | 9/22/2010 16:15:00 | 25.0 | 6/30/2010 18:46:01 | 25.1543 |
| 6/29/2010 21:22:01 | 24.426 | 9/22/2010 16:50:00 | 25.5 | 6/30/2010 19:06:01 | 25.1543 |
| 6/29/2010 21:42:01 | 24.489 | 9/22/2010 17:25:00 | 25.5 | 6/30/2010 19:26:01 | 25.1543 |
| 6/29/2010 22:02:01 | 24.489 | 9/22/2010 18:00:00 | 25.5 | 6/30/2010 19:46:01 | 25.1543 |
| 6/29/2010 22:22:01 | 24.489 | 9/22/2010 18:35:00 | 25.5 | 6/30/2010 20:06:01 | 25.1543 |
| 6/29/2010 22:42:01 | 24.489 | 9/22/2010 19:10:00 | 25.5 | 6/30/2010 20:26:01 | 25.1543 |
| 6/29/2010 23:02:01 | 24.489 | 9/22/2010 19:45:00 | 25.5 | 6/30/2010 20:46:01 | 25.1543 |
| 6/29/2010 23:22:01 | 24.489 | 9/22/2010 20:20:00 | 25.5 | 6/30/2010 21:06:01 | 25.1543 |
| 6/29/2010 23:42:01 | 24.489 | 9/22/2010 20:55:00 | 25.5 | 6/30/2010 21:26:01 | 25.1543 |
| 6/30/2010 00:02:01 | 24.489 | 9/22/2010 21:30:00 | 25.5 | 6/30/2010 21:46:01 | 25.1543 |
| 6/30/2010 00:22:01 | 24.489 | 9/22/2010 22:05:00 | 25.5 | 6/30/2010 22:06:01 | 25.2163 |
| 6/30/2010 00:42:01 | 24.489 | 9/22/2010 22:40:00 | 26.0 | 6/30/2010 22:26:01 | 25.2163 |
| 6/30/2010 01:02:01 | 24.489 | 9/22/2010 23:15:00 | 26.0 | 6/30/2010 22:46:01 | 25.2163 |
| 6/30/2010 01:22:01 | 24.489 | 9/22/2010 23:50:00 | 26.5 | 6/30/2010 23:06:01 | 25.2163 |
| 6/30/2010 01:42:01 | 24.489 | 9/23/2010 00:25:00 | 26.5 | 6/30/2010 23:26:01 | 25.2163 |
| 6/30/2010 02:02:01 | 24.489 | 9/23/2010 01:00:00 | 26.5 | 6/30/2010 23:46:01 | 25.2163 |
| 6/30/2010 02:22:01 | 24.489 | 9/23/2010 01:35:00 | 26.0 | 7/1/2010 00:06:01  | 25.2163 |
| 6/30/2010 02:42:01 | 24.489 | 9/23/2010 02:10:00 | 26.0 | 7/1/2010 00:26:01  | 25.2163 |
| 6/30/2010 03:02:01 | 24.426 | 9/23/2010 02:45:00 | 26.0 | 7/1/2010 00:46:01  | 25.2163 |
| 6/30/2010 03:22:01 | 24.426 | 9/23/2010 03:20:00 | 26.0 | 7/1/2010 01:06:01  | 25.2163 |
| 6/30/2010 03:42:01 | 24.426 | 9/23/2010 03:55:00 | 26.0 | 7/1/2010 01:26:01  | 25.2163 |
| 6/30/2010 04:02:01 | 24.426 | 9/23/2010 04:30:00 | 25.5 | 7/1/2010 01:46:01  | 25.2163 |
| 6/30/2010 04:22:01 | 24.426 | 9/23/2010 05:05:00 | 25.5 | 7/1/2010 02:06:01  | 25.2163 |
| 6/30/2010 04:42:01 | 24.426 | 9/23/2010 05:40:00 | 25.5 | 7/1/2010 02:26:01  | 25.2163 |
| 6/30/2010 05:02:01 | 24.364 | 9/23/2010 06:15:00 | 25.5 | 7/1/2010 02:46:01  | 25.2163 |
| 6/30/2010 05:22:01 | 24.364 | 9/23/2010 06:50:00 | 25.5 | 7/1/2010 03:06:01  | 25.2163 |
| 6/30/2010 05:42:01 | 24.364 | 9/23/2010 07:25:00 | 25.5 | 7/1/2010 03:26:01  | 25.2163 |
| 6/30/2010 06:02:01 | 24.364 | 9/23/2010 08:00:00 | 25.5 | 7/1/2010 03:46:01  | 25.2163 |
| 6/30/2010 06:22:01 | 24.364 | 9/23/2010 08:35:00 | 25.0 | 7/1/2010 04:06:01  | 25.2163 |
| 6/30/2010 06:42:01 | 24.301 | 9/23/2010 09:10:00 | 25.0 | 7/1/2010 04:26:01  | 25.2163 |
| 6/30/2010 07:02:01 | 24.301 | 9/23/2010 09:45:00 | 25.0 | 7/1/2010 04:46:01  | 25.2163 |
| 6/30/2010 07:22:01 | 24.301 | 9/23/2010 10:20:00 | 25.0 | 7/1/2010 05:06:01  | 25.2163 |
| 6/30/2010 07:42:01 | 24.301 | 9/23/2010 10:55:00 | 25.0 | 7/1/2010 05:26:01  | 25.2163 |
| 6/30/2010 08:02:01 | 24.239 | 9/23/2010 11:30:00 | 25.0 | 7/1/2010 05:46:01  | 25.2163 |
| 6/30/2010 08:22:01 | 24.239 | 9/23/2010 12:05:00 | 25.0 | 7/1/2010 06:06:01  | 25.2163 |
| 6/30/2010 08:42:01 | 24.239 | 9/23/2010 12:40:00 | 25.0 | 7/1/2010 06:26:01  | 25.1543 |
| 6/30/2010 09:02:01 | 24.239 | 9/23/2010 13:15:00 | 25.5 | 7/1/2010 06:46:01  | 25.1543 |



|                    |        |                    |      |                   |         |
|--------------------|--------|--------------------|------|-------------------|---------|
| 6/30/2010 09:22:01 | 24.176 | 9/23/2010 13:50:00 | 25.5 | 7/1/2010 07:06:01 | 25.1543 |
| 6/30/2010 09:42:01 | 24.176 | 9/23/2010 14:25:00 | 25.5 | 7/1/2010 07:26:01 | 25.1543 |
| 6/30/2010 10:02:01 | 24.176 | 9/23/2010 15:00:00 | 25.5 | 7/1/2010 07:46:01 | 25.1543 |
| 6/30/2010 10:22:01 | 24.176 | 9/23/2010 15:35:00 | 26.0 | 7/1/2010 08:06:01 | 25.1543 |
| 6/30/2010 10:42:01 | 24.114 | 9/23/2010 16:10:00 | 26.0 | 7/1/2010 08:26:01 | 25.1543 |
| 6/30/2010 11:02:01 | 24.114 | 9/23/2010 16:45:00 | 26.0 | 7/1/2010 08:46:01 | 25.0913 |
| 6/30/2010 11:22:01 | 24.114 | 9/23/2010 17:20:00 | 26.0 | 7/1/2010 09:06:01 | 25.0913 |
| 6/30/2010 11:42:01 | 24.114 | 9/23/2010 17:55:00 | 26.0 | 7/1/2010 09:26:01 | 25.0913 |
| 6/30/2010 12:02:01 | 24.051 | 9/23/2010 18:30:00 | 26.0 | 7/1/2010 09:46:01 | 25.0913 |
| 6/30/2010 12:22:01 | 24.051 | 9/23/2010 19:05:00 | 26.0 | 7/1/2010 10:06:01 | 25.0913 |
| 6/30/2010 12:42:01 | 24.051 | 9/23/2010 19:40:00 | 26.0 | 7/1/2010 10:26:01 | 25.0293 |
| 6/30/2010 13:02:01 | 24.051 | 9/23/2010 20:15:00 | 26.0 | 7/1/2010 10:46:01 | 25.0293 |
| 6/30/2010 13:22:01 | 24.051 | 9/23/2010 20:50:00 | 26.0 | 7/1/2010 11:06:01 | 25.0293 |
| 6/30/2010 13:42:01 | 24.051 | 9/23/2010 21:25:00 | 26.0 | 7/1/2010 11:26:01 | 25.0293 |
| 6/30/2010 14:02:01 | 24.051 | 9/23/2010 22:00:00 | 26.0 | 7/1/2010 11:46:01 | 24.9673 |
| 6/30/2010 14:22:01 | 24.051 | 9/23/2010 22:35:00 | 26.0 | 7/1/2010 12:06:01 | 24.9673 |
| 6/30/2010 14:42:01 | 24.051 | 9/23/2010 23:10:00 | 26.0 | 7/1/2010 12:26:01 | 24.9673 |
| 6/30/2010 15:02:01 | 24.051 | 9/23/2010 23:45:00 | 26.0 | 7/1/2010 12:46:01 | 24.9673 |
| 6/30/2010 15:22:01 | 24.051 | 9/24/2010 00:20:00 | 26.0 | 7/1/2010 13:06:01 | 24.9673 |
| 6/30/2010 15:42:01 | 24.114 | 9/24/2010 00:55:00 | 26.0 | 7/1/2010 13:26:01 | 24.9043 |
| 6/30/2010 16:02:01 | 24.114 | 9/24/2010 01:30:00 | 26.0 | 7/1/2010 13:46:01 | 24.9043 |
| 6/30/2010 16:22:01 | 24.114 | 9/24/2010 02:05:00 | 26.0 | 7/1/2010 14:06:01 | 24.9043 |
| 6/30/2010 16:42:01 | 24.176 | 9/24/2010 02:40:00 | 26.0 | 7/1/2010 14:26:01 | 24.9043 |
| 6/30/2010 17:02:01 | 24.176 | 9/24/2010 03:15:00 | 26.0 | 7/1/2010 14:46:01 | 24.8423 |
| 6/30/2010 17:22:01 | 24.176 | 9/24/2010 03:50:00 | 26.0 | 7/1/2010 15:06:01 | 24.8423 |
| 6/30/2010 17:42:01 | 24.239 | 9/24/2010 04:25:00 | 26.0 | 7/1/2010 15:26:01 | 24.8423 |
| 6/30/2010 18:02:01 | 24.239 | 9/24/2010 05:00:00 | 26.0 | 7/1/2010 15:46:01 | 24.8423 |
| 6/30/2010 18:22:01 | 24.239 | 9/24/2010 05:35:00 | 26.0 | 7/1/2010 16:06:01 | 24.8423 |
| 6/30/2010 18:42:01 | 24.301 | 9/24/2010 06:10:00 | 26.0 | 7/1/2010 16:26:01 | 24.8423 |
| 6/30/2010 19:02:01 | 24.301 | 9/24/2010 06:45:00 | 26.0 | 7/1/2010 16:46:01 | 24.8423 |
| 6/30/2010 19:22:01 | 24.301 | 9/24/2010 07:20:00 | 26.0 | 7/1/2010 17:06:01 | 24.8423 |
| 6/30/2010 19:42:01 | 24.364 | 9/24/2010 07:55:00 | 25.5 | 7/1/2010 17:26:01 | 24.8423 |
| 6/30/2010 20:02:01 | 24.364 | 9/24/2010 08:30:00 | 25.5 | 7/1/2010 17:46:01 | 24.8423 |
| 6/30/2010 20:22:01 | 24.364 | 9/24/2010 09:05:00 | 25.5 | 7/1/2010 18:06:01 | 24.8423 |
| 6/30/2010 20:42:01 | 24.364 | 9/24/2010 09:40:00 | 25.5 | 7/1/2010 18:26:01 | 24.8423 |
| 6/30/2010 21:02:01 | 24.364 | 9/24/2010 10:15:00 | 25.5 | 7/1/2010 18:46:01 | 24.8423 |
| 6/30/2010 21:22:01 | 24.426 | 9/24/2010 10:50:00 | 25.5 | 7/1/2010 19:06:01 | 24.8423 |
| 6/30/2010 21:42:01 | 24.426 | 9/24/2010 11:25:00 | 25.5 | 7/1/2010 19:26:01 | 24.8423 |
| 6/30/2010 22:02:01 | 24.426 | 9/24/2010 12:00:00 | 25.5 | 7/1/2010 19:46:01 | 24.8423 |
| 6/30/2010 22:22:01 | 24.426 | 9/24/2010 12:35:00 | 25.5 | 7/1/2010 20:06:01 | 24.8423 |
| 6/30/2010 22:42:01 | 24.426 | 9/24/2010 13:10:00 | 25.5 | 7/1/2010 20:26:01 | 24.8423 |
| 6/30/2010 23:02:01 | 24.426 | 9/24/2010 13:45:00 | 25.5 | 7/1/2010 20:46:01 | 24.8423 |
| 6/30/2010 23:22:01 | 24.426 | 9/24/2010 14:20:00 | 26.0 | 7/1/2010 21:06:01 | 24.8423 |
| 6/30/2010 23:42:01 | 24.426 | 9/24/2010 14:55:00 | 26.0 | 7/1/2010 21:26:01 | 24.8423 |
| 7/1/2010 00:02:01  | 24.426 | 9/24/2010 15:30:00 | 26.0 | 7/1/2010 21:46:01 | 24.8423 |
| 7/1/2010 00:22:01  | 24.426 | 9/24/2010 16:05:00 | 26.0 | 7/1/2010 22:06:01 | 24.8423 |
| 7/1/2010 00:42:01  | 24.426 | 9/24/2010 16:40:00 | 26.0 | 7/1/2010 22:26:01 | 24.9043 |
| 7/1/2010 01:02:01  | 24.426 | 9/24/2010 17:15:00 | 26.0 | 7/1/2010 22:46:01 | 24.9043 |
| 7/1/2010 01:22:01  | 24.426 | 9/24/2010 17:50:00 | 26.0 | 7/1/2010 23:06:01 | 24.9043 |
| 7/1/2010 01:42:01  | 24.364 | 9/24/2010 18:25:00 | 26.5 | 7/1/2010 23:26:01 | 24.9043 |

|                   |        |                    |      |                   |         |
|-------------------|--------|--------------------|------|-------------------|---------|
| 7/1/2010 02:02:01 | 24.364 | 9/24/2010 19:00:00 | 26.5 | 7/1/2010 23:46:01 | 24.9043 |
| 7/1/2010 02:22:01 | 24.364 | 9/24/2010 19:35:00 | 26.5 | 7/2/2010 00:06:01 | 24.9043 |
| 7/1/2010 02:42:01 | 24.364 | 9/24/2010 20:10:00 | 26.5 | 7/2/2010 00:26:01 | 24.9043 |
| 7/1/2010 03:02:01 | 24.364 | 9/24/2010 20:45:00 | 26.5 | 7/2/2010 00:46:01 | 24.9043 |
| 7/1/2010 03:22:01 | 24.364 | 9/24/2010 21:20:00 | 26.5 | 7/2/2010 01:06:01 | 24.9043 |
| 7/1/2010 03:42:01 | 24.364 | 9/24/2010 21:55:00 | 26.5 | 7/2/2010 01:26:01 | 24.9043 |
| 7/1/2010 04:02:01 | 24.301 | 9/24/2010 22:30:00 | 26.5 | 7/2/2010 01:46:01 | 24.9043 |
| 7/1/2010 04:22:01 | 24.301 | 9/24/2010 23:05:00 | 26.5 | 7/2/2010 02:06:01 | 24.9043 |
| 7/1/2010 04:42:01 | 24.301 | 9/24/2010 23:40:00 | 26.5 | 7/2/2010 02:26:01 | 24.9043 |
| 7/1/2010 05:02:01 | 24.301 | 9/25/2010 00:15:00 | 26.5 | 7/2/2010 02:46:01 | 24.9043 |
| 7/1/2010 05:22:01 | 24.239 | 9/25/2010 00:50:00 | 26.5 | 7/2/2010 03:06:01 | 24.9043 |
| 7/1/2010 05:42:01 | 24.239 | 9/25/2010 01:25:00 | 26.5 | 7/2/2010 03:26:01 | 24.9043 |
| 7/1/2010 06:02:01 | 24.239 | 9/25/2010 02:00:00 | 26.5 | 7/2/2010 03:46:01 | 24.9043 |
| 7/1/2010 06:22:01 | 24.239 | 9/25/2010 02:35:00 | 26.0 | 7/2/2010 04:06:01 | 24.9043 |
| 7/1/2010 06:42:01 | 24.176 | 9/25/2010 03:10:00 | 26.0 | 7/2/2010 04:26:01 | 24.9043 |
| 7/1/2010 07:02:01 | 24.176 | 9/25/2010 03:45:00 | 26.0 | 7/2/2010 04:46:01 | 24.9043 |
| 7/1/2010 07:22:01 | 24.176 | 9/25/2010 04:20:00 | 26.0 | 7/2/2010 05:06:01 | 24.8423 |
| 7/1/2010 07:42:01 | 24.114 | 9/25/2010 04:55:00 | 26.0 | 7/2/2010 05:26:01 | 24.8423 |
| 7/1/2010 08:02:01 | 24.114 | 9/25/2010 05:30:00 | 26.0 | 7/2/2010 05:46:01 | 24.8423 |
| 7/1/2010 08:22:01 | 24.114 | 9/25/2010 06:05:00 | 26.0 | 7/2/2010 06:06:01 | 24.8423 |
| 7/1/2010 08:42:01 | 24.051 | 9/25/2010 06:40:00 | 26.0 | 7/2/2010 06:26:01 | 24.8423 |
| 7/1/2010 09:02:01 | 24.051 | 9/25/2010 07:15:00 | 26.0 | 7/2/2010 06:46:01 | 24.8423 |
| 7/1/2010 09:22:01 | 24.051 | 9/25/2010 07:50:00 | 26.0 | 7/2/2010 07:06:01 | 24.8423 |
| 7/1/2010 09:42:01 | 23.989 | 9/25/2010 08:25:00 | 25.5 | 7/2/2010 07:26:01 | 24.8423 |
| 7/1/2010 10:02:01 | 23.989 | 9/25/2010 09:00:00 | 25.5 | 7/2/2010 07:46:01 | 24.8423 |
| 7/1/2010 10:22:01 | 23.926 | 9/25/2010 09:35:00 | 25.5 | 7/2/2010 08:06:01 | 24.7793 |
| 7/1/2010 10:42:01 | 23.926 | 9/25/2010 10:10:00 | 25.5 | 7/2/2010 08:26:01 | 24.7793 |
| 7/1/2010 11:02:01 | 23.926 | 9/25/2010 10:45:00 | 25.5 | 7/2/2010 08:46:01 | 24.7793 |
| 7/1/2010 11:22:01 | 23.864 | 9/25/2010 11:20:00 | 25.5 | 7/2/2010 09:06:01 | 24.7793 |
| 7/1/2010 11:42:01 | 23.864 | 9/25/2010 11:55:00 | 25.5 | 7/2/2010 09:26:01 | 24.7793 |
| 7/1/2010 12:02:01 | 23.801 | 9/25/2010 12:30:00 | 25.5 | 7/2/2010 09:46:01 | 24.7793 |
| 7/1/2010 12:22:01 | 23.801 | 9/25/2010 13:05:00 | 25.5 | 7/2/2010 10:06:01 | 24.7173 |
| 7/1/2010 12:42:01 | 23.801 | 9/25/2010 13:40:00 | 25.5 | 7/2/2010 10:26:01 | 24.7173 |
| 7/1/2010 13:02:01 | 23.801 | 9/25/2010 14:15:00 | 25.5 | 7/2/2010 10:46:01 | 24.7173 |
| 7/1/2010 13:22:01 | 23.801 | 9/25/2010 14:50:00 | 25.5 | 7/2/2010 11:06:01 | 24.7173 |
| 7/1/2010 13:42:01 | 23.739 | 9/25/2010 15:25:00 | 26.0 | 7/2/2010 11:26:01 | 24.7173 |
| 7/1/2010 14:02:01 | 23.739 | 9/25/2010 16:00:00 | 26.0 | 7/2/2010 11:46:01 | 24.7173 |
| 7/1/2010 14:22:01 | 23.739 | 9/25/2010 16:35:00 | 26.0 | 7/2/2010 12:06:01 | 24.6543 |
| 7/1/2010 14:42:01 | 23.739 | 9/25/2010 17:10:00 | 26.0 | 7/2/2010 12:26:01 | 24.6543 |
| 7/1/2010 15:02:01 | 23.739 | 9/25/2010 17:45:00 | 26.0 | 7/2/2010 12:46:01 | 24.6543 |
| 7/1/2010 15:22:01 | 23.801 | 9/25/2010 18:20:00 | 26.0 | 7/2/2010 13:06:01 | 24.6543 |
| 7/1/2010 15:42:01 | 23.801 | 9/25/2010 18:55:00 | 26.0 | 7/2/2010 13:26:01 | 24.6543 |
| 7/1/2010 16:02:01 | 23.801 | 9/25/2010 19:30:00 | 26.0 | 7/2/2010 13:46:01 | 24.6543 |
| 7/1/2010 16:22:01 | 23.801 | 9/25/2010 20:05:00 | 26.0 | 7/2/2010 14:06:01 | 24.5913 |
| 7/1/2010 16:42:01 | 23.864 | 9/25/2010 20:40:00 | 26.0 | 7/2/2010 14:26:01 | 24.5913 |
| 7/1/2010 17:02:01 | 23.864 | 9/25/2010 21:15:00 | 26.5 | 7/2/2010 14:46:01 | 24.5913 |
| 7/1/2010 17:22:01 | 23.864 | 9/25/2010 21:50:00 | 26.0 | 7/2/2010 15:06:01 | 24.5913 |
| 7/1/2010 17:42:01 | 23.926 | 9/25/2010 22:25:00 | 26.0 | 7/2/2010 15:26:01 | 24.5913 |
| 7/1/2010 18:02:01 | 23.926 | 9/25/2010 23:00:00 | 26.0 | 7/2/2010 15:46:01 | 24.5913 |
| 7/1/2010 18:22:01 | 23.926 | 9/25/2010 23:35:00 | 26.0 | 7/2/2010 16:06:01 | 24.5913 |

|                   |                           |                        |         |
|-------------------|---------------------------|------------------------|---------|
| 7/1/2010 18:42:01 | 23.989 9/26/2010 00:10:00 | 26.0 7/2/2010 16:26:01 | 24.5913 |
| 7/1/2010 19:02:01 | 23.989 9/26/2010 00:45:00 | 26.0 7/2/2010 16:46:01 | 24.5913 |
| 7/1/2010 19:22:01 | 23.989 9/26/2010 01:20:00 | 26.0 7/2/2010 17:06:01 | 24.5913 |
| 7/1/2010 19:42:01 | 24.051 9/26/2010 01:55:00 | 26.0 7/2/2010 17:26:01 | 24.5913 |
| 7/1/2010 20:02:01 | 24.051 9/26/2010 02:30:00 | 26.0 7/2/2010 17:46:01 | 24.5913 |
| 7/1/2010 20:22:01 | 24.051 9/26/2010 03:05:00 | 26.0 7/2/2010 18:06:01 | 24.5913 |
| 7/1/2010 20:42:01 | 24.051 9/26/2010 03:40:00 | 26.0 7/2/2010 18:26:01 | 24.5913 |
| 7/1/2010 21:02:01 | 24.114 9/26/2010 04:15:00 | 26.0 7/2/2010 18:46:01 | 24.5913 |
| 7/1/2010 21:22:01 | 24.114 9/26/2010 04:50:00 | 25.5 7/2/2010 19:06:01 | 24.5913 |
| 7/1/2010 21:42:01 | 24.114 9/26/2010 05:25:00 | 25.5 7/2/2010 19:26:01 | 24.5913 |
| 7/1/2010 22:02:01 | 24.114 9/26/2010 06:00:00 | 25.5 7/2/2010 19:46:01 | 24.5913 |
| 7/1/2010 22:22:01 | 24.114 9/26/2010 06:35:00 | 25.5 7/2/2010 20:06:01 | 24.5913 |
| 7/1/2010 22:42:01 | 24.114 9/26/2010 07:10:00 | 25.5 7/2/2010 20:26:01 | 24.5913 |
| 7/1/2010 23:02:01 | 24.114 9/26/2010 07:45:00 | 25.5 7/2/2010 20:46:01 | 24.6543 |
| 7/1/2010 23:22:01 | 24.114 9/26/2010 08:20:00 | 25.5 7/2/2010 21:06:01 | 24.6543 |
| 7/1/2010 23:42:01 | 24.114 9/26/2010 08:55:00 | 25.5 7/2/2010 21:26:01 | 24.6543 |
| 7/2/2010 00:02:01 | 24.114 9/26/2010 09:30:00 | 25.0 7/2/2010 21:46:01 | 24.6543 |
| 7/2/2010 00:22:01 | 24.114 9/26/2010 10:05:00 | 25.0 7/2/2010 22:06:01 | 24.6543 |
| 7/2/2010 00:42:01 | 24.114 9/26/2010 10:40:00 | 25.0 7/2/2010 22:26:01 | 24.6543 |
| 7/2/2010 01:02:01 | 24.051 9/26/2010 11:15:00 | 25.0 7/2/2010 22:46:01 | 24.6543 |
| 7/2/2010 01:22:01 | 24.051 9/26/2010 11:50:00 | 25.0 7/2/2010 23:06:01 | 24.6543 |
| 7/2/2010 01:42:01 | 24.051 9/26/2010 12:25:00 | 25.0 7/2/2010 23:26:01 | 24.6543 |
| 7/2/2010 02:02:01 | 24.051 9/26/2010 13:00:00 | 25.5 7/2/2010 23:46:01 | 24.7173 |
| 7/2/2010 02:22:01 | 24.051 9/26/2010 13:35:00 | 25.5 7/3/2010 00:06:01 | 24.6543 |
| 7/2/2010 02:42:01 | 24.051 9/26/2010 14:10:00 | 25.5 7/3/2010 00:26:01 | 24.7173 |
| 7/2/2010 03:02:01 | 23.989 9/26/2010 14:45:00 | 25.5 7/3/2010 00:46:01 | 24.6543 |
| 7/2/2010 03:22:01 | 23.989 9/26/2010 15:20:00 | 25.5 7/3/2010 01:06:01 | 24.7173 |
| 7/2/2010 03:42:01 | 23.989 9/26/2010 15:55:00 | 25.5 7/3/2010 01:26:01 | 24.7173 |
| 7/2/2010 04:02:01 | 23.989 9/26/2010 16:30:00 | 26.0 7/3/2010 01:46:01 | 24.7173 |
| 7/2/2010 04:22:01 | 23.989 9/26/2010 17:05:00 | 26.0 7/3/2010 02:06:01 | 24.7173 |
| 7/2/2010 04:42:01 | 23.926 9/26/2010 17:40:00 | 26.0 7/3/2010 02:26:01 | 24.7173 |
| 7/2/2010 05:02:01 | 23.926 9/26/2010 18:15:00 | 26.0 7/3/2010 02:46:01 | 24.7173 |
| 7/2/2010 05:22:01 | 23.926 9/26/2010 18:50:00 | 26.0 7/3/2010 03:06:01 | 24.7173 |
| 7/2/2010 05:42:01 | 23.926 9/26/2010 19:25:00 | 26.0 7/3/2010 03:26:01 | 24.6543 |
| 7/2/2010 06:02:01 | 23.926 9/26/2010 20:00:00 | 26.0 7/3/2010 03:46:01 | 24.7173 |
| 7/2/2010 06:22:01 | 23.864 9/26/2010 20:35:00 | 26.0 7/3/2010 04:06:01 | 24.6543 |
| 7/2/2010 06:42:01 | 23.864 9/26/2010 21:10:00 | 26.0 7/3/2010 04:26:01 | 24.6543 |
| 7/2/2010 07:02:01 | 23.864 9/26/2010 21:45:00 | 26.0 7/3/2010 04:46:01 | 24.6543 |
| 7/2/2010 07:22:01 | 23.864 9/26/2010 22:20:00 | 26.0 7/3/2010 05:06:01 | 24.6543 |
| 7/2/2010 07:42:01 | 23.801 9/26/2010 22:55:00 | 26.0 7/3/2010 05:26:01 | 24.6543 |
| 7/2/2010 08:02:01 | 23.801 9/26/2010 23:30:00 | 26.0 7/3/2010 05:46:01 | 24.6543 |
| 7/2/2010 08:22:01 | 23.801 9/27/2010 00:05:00 | 26.0 7/3/2010 06:06:01 | 24.6543 |
| 7/2/2010 08:42:01 | 23.801 9/27/2010 00:40:00 | 26.0 7/3/2010 06:26:01 | 24.6543 |
| 7/2/2010 09:02:01 | 23.739 9/27/2010 01:15:00 | 26.0 7/3/2010 06:46:01 | 24.6543 |
| 7/2/2010 09:22:01 | 23.739 9/27/2010 01:50:00 | 26.0 7/3/2010 07:06:01 | 24.6543 |
| 7/2/2010 09:42:01 | 23.739 9/27/2010 02:25:00 | 26.0 7/3/2010 07:26:01 | 24.5913 |
| 7/2/2010 10:02:01 | 23.739 9/27/2010 03:00:00 | 26.0 7/3/2010 07:46:01 | 24.5913 |
| 7/2/2010 10:22:01 | 23.676 9/27/2010 03:35:00 | 26.0 7/3/2010 08:06:01 | 24.5913 |
| 7/2/2010 10:42:01 | 23.676 9/27/2010 04:10:00 | 26.0 7/3/2010 08:26:01 | 24.5913 |
| 7/2/2010 11:02:01 | 23.676 9/27/2010 04:45:00 | 25.5 7/3/2010 08:46:01 | 24.5913 |

|                   |        |                    |      |                   |         |
|-------------------|--------|--------------------|------|-------------------|---------|
| 7/2/2010 11:22:01 | 23.676 | 9/27/2010 05:20:00 | 25.5 | 7/3/2010 09:06:01 | 24.5913 |
| 7/2/2010 11:42:01 | 23.676 | 9/27/2010 05:55:00 | 25.5 | 7/3/2010 09:26:01 | 24.5293 |
| 7/2/2010 12:02:01 | 23.614 | 9/27/2010 06:30:00 | 25.5 | 7/3/2010 09:46:01 | 24.5293 |
| 7/2/2010 12:22:01 | 23.614 | 9/27/2010 07:05:00 | 25.5 | 7/3/2010 10:06:01 | 24.5293 |
| 7/2/2010 12:42:01 | 23.614 | 9/27/2010 07:40:00 | 25.5 | 7/3/2010 10:26:01 | 24.5293 |
| 7/2/2010 13:02:01 | 23.614 | 9/27/2010 08:15:00 | 25.5 | 7/3/2010 10:46:01 | 24.5293 |
| 7/2/2010 13:22:01 | 23.614 | 9/27/2010 08:50:00 | 25.0 | 7/3/2010 11:06:01 | 24.5293 |
| 7/2/2010 13:42:01 | 23.614 | 9/27/2010 09:25:00 | 25.0 | 7/3/2010 11:26:01 | 24.4663 |
| 7/2/2010 14:02:01 | 23.614 | 9/27/2010 10:00:00 | 25.0 | 7/3/2010 11:46:01 | 24.4663 |
| 7/2/2010 14:22:01 | 23.614 | 9/27/2010 10:35:00 | 25.0 | 7/3/2010 12:06:01 | 24.4663 |
| 7/2/2010 14:42:01 | 23.614 | 9/27/2010 11:10:00 | 25.0 | 7/3/2010 12:26:01 | 24.4663 |
| 7/2/2010 15:02:01 | 23.614 | 9/27/2010 11:45:00 | 25.0 | 7/3/2010 12:46:01 | 24.4663 |
| 7/2/2010 15:22:01 | 23.676 | 9/27/2010 12:20:00 | 25.0 | 7/3/2010 13:06:01 | 24.4043 |
| 7/2/2010 15:42:01 | 23.676 | 9/27/2010 12:55:00 | 25.5 | 7/3/2010 13:26:01 | 24.4043 |
| 7/2/2010 16:02:01 | 23.676 | 9/27/2010 13:30:00 | 25.5 | 7/3/2010 13:46:01 | 24.4043 |
| 7/2/2010 16:22:01 | 23.739 | 9/27/2010 14:05:00 | 25.5 | 7/3/2010 14:06:01 | 24.4043 |
| 7/2/2010 16:42:01 | 23.739 | 9/27/2010 14:40:00 | 25.5 | 7/3/2010 14:26:01 | 24.4043 |
| 7/2/2010 17:02:01 | 23.739 | 9/27/2010 15:15:00 | 25.5 | 7/3/2010 14:46:01 | 24.4043 |
| 7/2/2010 17:22:01 | 23.801 | 9/27/2010 15:50:00 | 25.5 | 7/3/2010 15:06:01 | 24.3413 |
| 7/2/2010 17:42:01 | 23.801 | 9/27/2010 16:25:00 | 26.0 | 7/3/2010 15:26:01 | 24.3413 |
| 7/2/2010 18:02:01 | 23.801 | 9/27/2010 17:00:00 | 26.0 | 7/3/2010 15:46:01 | 24.3413 |
| 7/2/2010 18:22:01 | 23.864 | 9/27/2010 17:35:00 | 26.0 | 7/3/2010 16:06:01 | 24.3413 |
| 7/2/2010 18:42:01 | 23.864 | 9/27/2010 18:10:00 | 26.0 | 7/3/2010 16:26:01 | 24.3413 |
| 7/2/2010 19:02:01 | 23.864 | 9/27/2010 18:45:00 | 26.0 | 7/3/2010 16:46:01 | 24.3413 |
| 7/2/2010 19:22:01 | 23.926 | 9/27/2010 19:20:00 | 26.0 | 7/3/2010 17:06:01 | 24.3413 |
| 7/2/2010 19:42:01 | 23.926 | 9/27/2010 19:55:00 | 26.0 | 7/3/2010 17:26:01 | 24.3413 |
| 7/2/2010 20:02:01 | 23.926 | 9/27/2010 20:30:00 | 26.0 | 7/3/2010 17:46:01 | 24.3413 |
| 7/2/2010 20:22:01 | 23.989 | 9/27/2010 21:05:00 | 26.0 | 7/3/2010 18:06:01 | 24.3413 |
| 7/2/2010 20:42:01 | 23.989 | 9/27/2010 21:40:00 | 26.0 | 7/3/2010 18:26:01 | 24.3413 |
| 7/2/2010 21:02:01 | 23.989 | 9/27/2010 22:15:00 | 26.0 | 7/3/2010 18:46:01 | 24.3413 |
| 7/2/2010 21:22:01 | 23.989 | 9/27/2010 22:50:00 | 26.0 | 7/3/2010 19:06:01 | 24.3413 |
| 7/2/2010 21:42:01 | 23.989 | 9/27/2010 23:25:00 | 26.0 | 7/3/2010 19:26:01 | 24.4043 |
| 7/2/2010 22:02:01 | 23.989 | 9/28/2010 00:00:00 | 26.0 | 7/3/2010 19:46:01 | 24.4043 |
| 7/2/2010 22:22:01 | 23.989 | 9/28/2010 00:35:00 | 26.0 | 7/3/2010 20:06:01 | 24.4043 |
| 7/2/2010 22:42:01 | 23.989 | 9/28/2010 01:10:00 | 26.0 | 7/3/2010 20:26:01 | 24.4043 |
| 7/2/2010 23:02:01 | 23.989 | 9/28/2010 01:45:00 | 26.0 | 7/3/2010 20:46:01 | 24.4043 |
| 7/2/2010 23:22:01 | 23.989 | 9/28/2010 02:20:00 | 26.0 | 7/3/2010 21:06:01 | 24.4043 |
| 7/2/2010 23:42:01 | 23.989 | 9/28/2010 02:55:00 | 26.0 | 7/3/2010 21:26:01 | 24.4043 |
| 7/3/2010 00:02:01 | 23.989 | 9/28/2010 03:30:00 | 26.0 | 7/3/2010 21:46:01 | 24.4043 |
| 7/3/2010 00:22:01 | 23.989 | 9/28/2010 04:05:00 | 25.5 | 7/3/2010 22:06:01 | 24.4663 |
| 7/3/2010 00:42:01 | 23.989 | 9/28/2010 04:40:00 | 25.5 | 7/3/2010 22:26:01 | 24.4663 |
| 7/3/2010 01:02:01 | 23.989 | 9/28/2010 05:15:00 | 25.5 | 7/3/2010 22:46:01 | 24.4663 |
| 7/3/2010 01:22:01 | 23.989 | 9/28/2010 05:50:00 | 25.5 | 7/3/2010 23:06:01 | 24.4663 |
| 7/3/2010 01:42:01 | 23.989 | 9/28/2010 06:25:00 | 25.5 | 7/3/2010 23:26:01 | 24.4663 |
| 7/3/2010 02:02:01 | 23.926 | 9/28/2010 07:00:00 | 25.5 | 7/3/2010 23:46:01 | 24.4663 |
| 7/3/2010 02:22:01 | 23.926 | 9/28/2010 07:35:00 | 25.0 | 7/4/2010 00:06:01 | 24.5293 |
| 7/3/2010 02:42:01 | 23.926 | 9/28/2010 08:10:00 | 25.0 | 7/4/2010 00:26:01 | 24.5293 |
| 7/3/2010 03:02:01 | 23.926 | 9/28/2010 08:45:00 | 25.0 | 7/4/2010 00:46:01 | 24.5293 |
| 7/3/2010 03:22:01 | 23.864 | 9/28/2010 09:20:00 | 25.0 | 7/4/2010 01:06:01 | 24.5293 |
| 7/3/2010 03:42:01 | 23.864 | 9/28/2010 09:55:00 | 25.0 | 7/4/2010 01:26:01 | 24.5293 |

|                   |                           |                        |         |
|-------------------|---------------------------|------------------------|---------|
| 7/3/2010 04:02:01 | 23.864 9/28/2010 10:30:00 | 25.0 7/4/2010 01:46:01 | 24.5293 |
| 7/3/2010 04:22:01 | 23.864 9/28/2010 11:05:00 | 25.0 7/4/2010 02:06:01 | 24.5293 |
| 7/3/2010 04:42:01 | 23.864 9/28/2010 11:40:00 | 25.0 7/4/2010 02:26:01 | 24.5293 |
| 7/3/2010 05:02:01 | 23.801 9/28/2010 12:15:00 | 25.0 7/4/2010 02:46:01 | 24.5293 |
| 7/3/2010 05:22:01 | 23.801 9/28/2010 12:50:00 | 25.0 7/4/2010 03:06:01 | 24.5293 |
| 7/3/2010 05:42:01 | 23.801 9/28/2010 13:25:00 | 25.0 7/4/2010 03:26:01 | 24.5913 |
| 7/3/2010 06:02:01 | 23.801 9/28/2010 14:00:00 | 25.5 7/4/2010 03:46:01 | 24.5293 |
| 7/3/2010 06:22:01 | 23.739 9/28/2010 14:35:00 | 25.5 7/4/2010 04:06:01 | 24.5913 |
| 7/3/2010 06:42:01 | 23.739 9/28/2010 15:10:00 | 25.5 7/4/2010 04:26:01 | 24.5913 |
| 7/3/2010 07:02:01 | 23.739 9/28/2010 15:45:00 | 25.5 7/4/2010 04:46:01 | 24.5293 |
| 7/3/2010 07:22:01 | 23.676 9/28/2010 16:20:00 | 25.5 7/4/2010 05:06:01 | 24.5913 |
| 7/3/2010 07:42:01 | 23.676 9/28/2010 16:55:00 | 25.5 7/4/2010 05:26:01 | 24.5913 |
| 7/3/2010 08:02:01 | 23.676 9/28/2010 17:30:00 | 26.0 7/4/2010 05:46:01 | 24.5913 |
| 7/3/2010 08:22:01 | 23.614 9/28/2010 18:05:00 | 26.0 7/4/2010 06:06:01 | 24.5293 |
| 7/3/2010 08:42:01 | 23.614 9/28/2010 18:40:00 | 26.0 7/4/2010 06:26:01 | 24.5293 |
| 7/3/2010 09:02:01 | 23.614 9/28/2010 19:15:00 | 26.0 7/4/2010 06:46:01 | 24.5293 |
| 7/3/2010 09:22:01 | 23.614 9/28/2010 19:50:00 | 26.0 7/4/2010 07:06:01 | 24.5293 |
| 7/3/2010 09:42:01 | 23.551 9/28/2010 20:25:00 | 26.0 7/4/2010 07:26:01 | 24.5293 |
| 7/3/2010 10:02:01 | 23.551 9/28/2010 21:00:00 | 26.0 7/4/2010 07:46:01 | 24.5293 |
| 7/3/2010 10:22:01 | 23.551 9/28/2010 21:35:00 | 26.0 7/4/2010 08:06:01 | 24.5293 |
| 7/3/2010 10:42:01 | 23.489 9/28/2010 22:10:00 | 26.0 7/4/2010 08:26:01 | 24.5293 |
| 7/3/2010 11:02:01 | 23.489 9/28/2010 22:45:00 | 26.0 7/4/2010 08:46:01 | 24.5293 |
| 7/3/2010 11:22:01 | 23.489 9/28/2010 23:20:00 | 26.0 7/4/2010 09:06:01 | 24.5293 |
| 7/3/2010 11:42:01 | 23.489 9/28/2010 23:55:00 | 26.0 7/4/2010 09:26:01 | 24.5293 |
| 7/3/2010 12:02:01 | 23.489 9/29/2010 00:30:00 | 26.0 7/4/2010 09:46:01 | 24.5293 |
| 7/3/2010 12:22:01 | 23.426 9/29/2010 01:05:00 | 26.0 7/4/2010 10:06:01 | 24.4663 |
| 7/3/2010 12:42:01 | 23.426 9/29/2010 01:40:00 | 26.0 7/4/2010 10:26:01 | 24.4663 |
| 7/3/2010 13:02:01 | 23.426 9/29/2010 02:15:00 | 26.0 7/4/2010 10:46:01 | 24.4663 |
| 7/3/2010 13:22:01 | 23.426 9/29/2010 02:50:00 | 26.0 7/4/2010 11:06:01 | 24.4663 |
| 7/3/2010 13:42:01 | 23.426 9/29/2010 03:25:00 | 25.5 7/4/2010 11:26:01 | 24.4663 |
| 7/3/2010 14:02:01 | 23.426 9/29/2010 04:00:00 | 25.5 7/4/2010 11:46:01 | 24.4663 |
| 7/3/2010 14:22:01 | 23.426 9/29/2010 04:35:00 | 25.5 7/4/2010 12:06:01 | 24.4043 |
| 7/3/2010 14:42:01 | 23.426 9/29/2010 05:10:00 | 25.5 7/4/2010 12:26:01 | 24.4043 |
| 7/3/2010 15:02:01 | 23.426 9/29/2010 05:45:00 | 25.5 7/4/2010 12:46:01 | 24.4043 |
| 7/3/2010 15:22:01 | 23.489 9/29/2010 06:20:00 | 25.5 7/4/2010 13:06:01 | 24.4043 |
| 7/3/2010 15:42:01 | 23.489 9/29/2010 06:55:00 | 25.5 7/4/2010 13:26:01 | 24.4043 |
| 7/3/2010 16:02:01 | 23.489 9/29/2010 07:30:00 | 25.5 7/4/2010 13:46:01 | 24.4043 |
| 7/3/2010 16:22:01 | 23.551 9/29/2010 08:05:00 | 25.5 7/4/2010 14:06:01 | 24.3413 |
| 7/3/2010 16:42:01 | 23.551 9/29/2010 08:40:00 | 25.5 7/4/2010 14:26:01 | 24.3413 |
| 7/3/2010 17:02:01 | 23.551 9/29/2010 09:15:00 | 25.0 7/4/2010 14:46:01 | 24.3413 |
| 7/3/2010 17:22:01 | 23.614 9/29/2010 09:50:00 | 25.0 7/4/2010 15:06:01 | 24.3413 |
| 7/3/2010 17:42:01 | 23.614 9/29/2010 10:25:00 | 25.0 7/4/2010 15:26:01 | 24.3413 |
| 7/3/2010 18:02:01 | 23.676 9/29/2010 11:00:00 | 25.0 7/4/2010 15:46:01 | 24.3413 |
| 7/3/2010 18:22:01 | 23.676 9/29/2010 11:35:00 | 25.0 7/4/2010 16:06:01 | 24.3413 |
| 7/3/2010 18:42:01 | 23.739 9/29/2010 12:10:00 | 25.0 7/4/2010 16:26:01 | 24.3413 |
| 7/3/2010 19:02:01 | 23.739 9/29/2010 12:45:00 | 25.0 7/4/2010 16:46:01 | 24.3413 |
| 7/3/2010 19:22:01 | 23.739 9/29/2010 13:20:00 | 25.5 7/4/2010 17:06:01 | 24.3413 |
| 7/3/2010 19:42:01 | 23.801 9/29/2010 13:55:00 | 25.5 7/4/2010 17:26:01 | 24.3413 |
| 7/3/2010 20:02:01 | 23.801 9/29/2010 14:30:00 | 25.5 7/4/2010 17:46:01 | 24.3413 |
| 7/3/2010 20:22:01 | 23.801 9/29/2010 15:05:00 | 25.5 7/4/2010 18:06:01 | 24.3413 |

|                   |        |                    |      |                   |         |
|-------------------|--------|--------------------|------|-------------------|---------|
| 7/3/2010 20:42:01 | 23.864 | 9/29/2010 15:40:00 | 25.5 | 7/4/2010 18:26:01 | 24.3413 |
| 7/3/2010 21:02:01 | 23.864 | 9/29/2010 16:15:00 | 25.5 | 7/4/2010 18:46:01 | 24.3413 |
| 7/3/2010 21:22:01 | 23.864 | 9/29/2010 16:50:00 | 26.0 | 7/4/2010 19:06:01 | 24.3413 |
| 7/3/2010 21:42:01 | 23.864 | 9/29/2010 17:25:00 | 26.0 | 7/4/2010 19:26:01 | 24.3413 |
| 7/3/2010 22:02:01 | 23.864 | 9/29/2010 18:00:00 | 26.0 | 7/4/2010 19:46:01 | 24.3413 |
| 7/3/2010 22:22:01 | 23.926 | 9/29/2010 18:35:00 | 26.0 | 7/4/2010 20:06:01 | 24.3413 |
| 7/3/2010 22:42:01 | 23.926 | 9/29/2010 19:10:00 | 26.0 | 7/4/2010 20:26:01 | 24.4043 |
| 7/3/2010 23:02:01 | 23.926 | 9/29/2010 19:45:00 | 26.0 | 7/4/2010 20:46:01 | 24.4043 |
| 7/3/2010 23:22:01 | 23.926 | 9/29/2010 20:20:00 | 26.0 | 7/4/2010 21:06:01 | 24.4043 |
| 7/3/2010 23:42:01 | 23.926 | 9/29/2010 20:55:00 | 26.0 | 7/4/2010 21:26:01 | 24.4043 |
| 7/4/2010 00:02:01 | 23.926 | 9/29/2010 21:30:00 | 26.0 | 7/4/2010 21:46:01 | 24.4043 |
| 7/4/2010 00:22:01 | 23.926 | 9/29/2010 22:05:00 | 26.0 | 7/4/2010 22:06:01 | 24.4043 |
| 7/4/2010 00:42:01 | 23.926 | 9/29/2010 22:40:00 | 26.0 | 7/4/2010 22:26:01 | 24.4043 |
| 7/4/2010 01:02:01 | 23.926 | 9/29/2010 23:15:00 | 26.0 | 7/4/2010 22:46:01 | 24.4043 |
| 7/4/2010 01:22:01 | 23.926 | 9/29/2010 23:50:00 | 26.0 | 7/4/2010 23:06:01 | 24.4043 |
| 7/4/2010 01:42:01 | 23.926 | 9/30/2010 00:25:00 | 26.0 | 7/4/2010 23:26:01 | 24.4663 |
| 7/4/2010 02:02:01 | 23.926 | 9/30/2010 01:00:00 | 26.0 | 7/4/2010 23:46:01 | 24.4663 |
| 7/4/2010 02:22:01 | 23.926 | 9/30/2010 01:35:00 | 26.0 | 7/5/2010 00:06:01 | 24.4663 |
| 7/4/2010 02:42:01 | 23.926 | 9/30/2010 02:10:00 | 26.0 | 7/5/2010 00:26:01 | 24.4663 |
| 7/4/2010 03:02:01 | 23.926 | 9/30/2010 02:45:00 | 26.0 | 7/5/2010 00:46:01 | 24.4663 |
| 7/4/2010 03:22:01 | 23.926 | 9/30/2010 03:20:00 | 26.0 | 7/5/2010 01:06:01 | 24.4663 |
| 7/4/2010 03:42:01 | 23.926 | 9/30/2010 03:55:00 | 26.0 | 7/5/2010 01:26:01 | 24.4663 |
| 7/4/2010 04:02:01 | 23.926 | 9/30/2010 04:30:00 | 26.0 | 7/5/2010 01:46:01 | 24.4663 |
| 7/4/2010 04:22:01 | 23.926 | 9/30/2010 05:05:00 | 26.0 | 7/5/2010 02:06:01 | 24.4663 |
| 7/4/2010 04:42:01 | 23.864 | 9/30/2010 05:40:00 | 25.5 | 7/5/2010 02:26:01 | 24.4663 |
| 7/4/2010 05:02:01 | 23.864 | 9/30/2010 06:15:00 | 25.5 | 7/5/2010 02:46:01 | 24.4663 |
| 7/4/2010 05:22:01 | 23.864 | 9/30/2010 06:50:00 | 25.5 | 7/5/2010 03:06:01 | 24.4663 |
| 7/4/2010 05:42:01 | 23.864 | 9/30/2010 07:25:00 | 25.5 | 7/5/2010 03:26:01 | 24.4663 |
| 7/4/2010 06:02:01 | 23.864 | 9/30/2010 08:00:00 | 25.5 | 7/5/2010 03:46:01 | 24.4663 |
| 7/4/2010 06:22:01 | 23.801 | 9/30/2010 08:35:00 | 25.5 | 7/5/2010 04:06:01 | 24.4663 |
| 7/4/2010 06:42:01 | 23.801 | 9/30/2010 09:10:00 | 25.5 | 7/5/2010 04:26:01 | 24.4663 |
| 7/4/2010 07:02:01 | 23.801 | 9/30/2010 09:45:00 | 25.5 | 7/5/2010 04:46:01 | 24.4663 |
| 7/4/2010 07:22:01 | 23.801 | 9/30/2010 10:20:00 | 25.5 | 7/5/2010 05:06:01 | 24.4663 |
| 7/4/2010 07:42:01 | 23.801 | 9/30/2010 10:55:00 | 25.5 | 7/5/2010 05:26:01 | 24.4663 |
| 7/4/2010 08:02:01 | 23.739 | 9/30/2010 11:30:00 | 25.5 | 7/5/2010 05:46:01 | 24.4663 |
| 7/4/2010 08:22:01 | 23.739 | 9/30/2010 12:05:00 | 25.5 | 7/5/2010 06:06:01 | 24.4663 |
| 7/4/2010 08:42:01 | 23.739 | 9/30/2010 12:40:00 | 25.5 | 7/5/2010 06:26:01 | 24.4663 |
| 7/4/2010 09:02:01 | 23.676 | 9/30/2010 13:15:00 | 25.5 | 7/5/2010 06:46:01 | 24.4663 |
| 7/4/2010 09:22:01 | 23.676 | 9/30/2010 13:50:00 | 25.5 | 7/5/2010 07:06:01 | 24.4663 |
| 7/4/2010 09:42:01 | 23.676 | 9/30/2010 14:25:00 | 25.5 | 7/5/2010 07:26:01 | 24.4663 |
| 7/4/2010 10:02:01 | 23.614 | 9/30/2010 15:00:00 | 26.0 | 7/5/2010 07:46:01 | 24.4663 |
| 7/4/2010 10:22:01 | 23.614 | 9/30/2010 15:35:00 | 26.0 | 7/5/2010 08:06:01 | 24.4043 |
| 7/4/2010 10:42:01 | 23.614 | 9/30/2010 16:10:00 | 26.0 | 7/5/2010 08:26:01 | 24.4043 |
| 7/4/2010 11:02:01 | 23.551 | 9/30/2010 16:45:00 | 26.0 | 7/5/2010 08:46:01 | 24.4043 |
| 7/4/2010 11:22:01 | 23.551 | 9/30/2010 17:20:00 | 26.0 | 7/5/2010 09:06:01 | 24.4043 |
| 7/4/2010 11:42:01 | 23.551 | 9/30/2010 17:55:00 | 26.0 | 7/5/2010 09:26:01 | 24.4043 |
| 7/4/2010 12:02:01 | 23.551 | 9/30/2010 18:30:00 | 26.0 | 7/5/2010 09:46:01 | 24.4043 |
| 7/4/2010 12:22:01 | 23.489 | 9/30/2010 19:05:00 | 26.5 | 7/5/2010 10:06:01 | 24.4043 |
| 7/4/2010 12:42:01 | 23.489 | 9/30/2010 19:40:00 | 26.0 | 7/5/2010 10:26:01 | 24.3413 |
| 7/4/2010 13:02:01 | 23.489 | 9/30/2010 20:15:00 | 26.5 | 7/5/2010 10:46:01 | 24.3413 |

|                   |                           |                        |         |
|-------------------|---------------------------|------------------------|---------|
| 7/4/2010 13:22:01 | 23.489 9/30/2010 20:50:00 | 26.5 7/5/2010 11:06:01 | 24.3413 |
| 7/4/2010 13:42:01 | 23.489 9/30/2010 21:25:00 | 26.5 7/5/2010 11:26:01 | 24.3413 |
| 7/4/2010 14:02:01 | 23.489 9/30/2010 22:00:00 | 26.5 7/5/2010 11:46:01 | 24.3413 |
| 7/4/2010 14:22:01 | 23.489 9/30/2010 22:35:00 | 26.5 7/5/2010 12:06:01 | 24.3413 |
| 7/4/2010 14:42:01 | 23.489 9/30/2010 23:10:00 | 26.5 7/5/2010 12:26:01 | 24.3413 |
| 7/4/2010 15:02:01 | 23.489 9/30/2010 23:45:00 | 26.5 7/5/2010 12:46:01 | 24.2793 |
| 7/4/2010 15:22:01 | 23.489 10/1/2010 00:20:00 | 26.5 7/5/2010 13:06:01 | 24.2793 |
| 7/4/2010 15:42:01 | 23.489 10/1/2010 00:55:00 | 26.0 7/5/2010 13:26:01 | 24.2793 |
| 7/4/2010 16:02:01 | 23.551 10/1/2010 01:30:00 | 26.0 7/5/2010 13:46:01 | 24.2793 |
| 7/4/2010 16:22:01 | 23.551 10/1/2010 02:05:00 | 26.0 7/5/2010 14:06:01 | 24.2793 |
| 7/4/2010 16:42:01 | 23.551 10/1/2010 02:40:00 | 26.0 7/5/2010 14:26:01 | 24.2793 |
| 7/4/2010 17:02:01 | 23.614 10/1/2010 03:15:00 | 26.0 7/5/2010 14:46:01 | 24.2163 |
| 7/4/2010 17:22:01 | 23.614 10/1/2010 03:50:00 | 26.0 7/5/2010 15:06:01 | 24.2163 |
| 7/4/2010 17:42:01 | 23.614 10/1/2010 04:25:00 | 26.0 7/5/2010 15:26:01 | 24.2163 |
| 7/4/2010 18:02:01 | 23.676 10/1/2010 05:00:00 | 26.0 7/5/2010 15:46:01 | 24.2163 |
| 7/4/2010 18:22:01 | 23.676 10/1/2010 05:35:00 | 26.0 7/5/2010 16:06:01 | 24.2163 |
| 7/4/2010 18:42:01 | 23.739 10/1/2010 06:10:00 | 26.0 7/5/2010 16:26:01 | 24.2163 |
| 7/4/2010 19:02:01 | 23.739 10/1/2010 06:45:00 | 26.0 7/5/2010 16:46:01 | 24.2163 |
| 7/4/2010 19:22:01 | 23.739 10/1/2010 07:20:00 | 26.0 7/5/2010 17:06:01 | 24.2163 |
| 7/4/2010 19:42:01 | 23.801 10/1/2010 07:55:00 | 26.0 7/5/2010 17:26:01 | 24.2163 |
| 7/4/2010 20:02:01 | 23.801 10/1/2010 08:30:00 | 26.0 7/5/2010 17:46:01 | 24.2163 |
| 7/4/2010 20:22:01 | 23.801 10/1/2010 09:05:00 | 26.0 7/5/2010 18:06:01 | 24.2163 |
| 7/4/2010 20:42:01 | 23.801 10/1/2010 09:40:00 | 25.5 7/5/2010 18:26:01 | 24.2163 |
| 7/4/2010 21:02:01 | 23.864 10/1/2010 10:15:00 | 25.5 7/5/2010 18:46:01 | 24.2163 |
| 7/4/2010 21:22:01 | 23.864 10/1/2010 10:50:00 | 25.5 7/5/2010 19:06:01 | 24.2163 |
| 7/4/2010 21:42:01 | 23.864 10/1/2010 11:25:00 | 25.5 7/5/2010 19:26:01 | 24.2163 |
| 7/4/2010 22:02:01 | 23.864 10/1/2010 12:00:00 | 26.0 7/5/2010 19:46:01 | 24.2163 |
| 7/4/2010 22:22:01 | 23.864 10/1/2010 12:35:00 | 26.0 7/5/2010 20:06:01 | 24.2163 |
| 7/4/2010 22:42:01 | 23.864 10/1/2010 13:10:00 | 26.0 7/5/2010 20:26:01 | 24.2163 |
| 7/4/2010 23:02:01 | 23.864 10/1/2010 13:45:00 | 26.0 7/5/2010 20:46:01 | 24.2163 |
| 7/4/2010 23:22:01 | 23.864 10/1/2010 14:20:00 | 26.0 7/5/2010 21:06:01 | 24.2793 |
| 7/4/2010 23:42:01 | 23.926 10/1/2010 14:55:00 | 26.0 7/5/2010 21:26:01 | 24.2793 |
| 7/5/2010 00:02:01 | 23.926 10/1/2010 15:30:00 | 26.0 7/5/2010 21:46:01 | 24.2793 |
| 7/5/2010 00:22:01 | 23.864 10/1/2010 16:05:00 | 26.5 7/5/2010 22:06:01 | 24.2793 |
| 7/5/2010 00:42:01 | 23.864 10/1/2010 16:40:00 | 26.5 7/5/2010 22:26:01 | 24.2793 |
| 7/5/2010 01:02:01 | 23.864 10/1/2010 17:15:00 | 26.5 7/5/2010 22:46:01 | 24.2793 |
| 7/5/2010 01:22:01 | 23.864 10/1/2010 17:50:00 | 26.5 7/5/2010 23:06:01 | 24.2793 |
| 7/5/2010 01:42:01 | 23.864 10/1/2010 18:25:00 | 26.5 7/5/2010 23:26:01 | 24.2793 |
| 7/5/2010 02:02:01 | 23.864 10/1/2010 19:00:00 | 26.5 7/5/2010 23:46:01 | 24.2793 |
| 7/5/2010 02:22:01 | 23.864 10/1/2010 19:35:00 | 26.5 7/6/2010 00:06:01 | 24.3413 |
| 7/5/2010 02:42:01 | 23.864 10/1/2010 20:10:00 | 26.5 7/6/2010 00:26:01 | 24.2793 |
| 7/5/2010 03:02:01 | 23.864 10/1/2010 20:45:00 | 26.5 7/6/2010 00:46:01 | 24.3413 |
| 7/5/2010 03:22:01 | 23.864 10/1/2010 21:20:00 | 26.5 7/6/2010 01:06:01 | 24.3413 |
| 7/5/2010 03:42:01 | 23.864 10/1/2010 21:55:00 | 26.5 7/6/2010 01:26:01 | 24.3413 |
| 7/5/2010 04:02:01 | 23.801 10/1/2010 22:30:00 | 26.5 7/6/2010 01:46:01 | 24.3413 |
| 7/5/2010 04:22:01 | 23.801 10/1/2010 23:05:00 | 26.5 7/6/2010 02:06:01 | 24.3413 |
| 7/5/2010 04:42:01 | 23.801 10/1/2010 23:40:00 | 26.5 7/6/2010 02:26:01 | 24.3413 |
| 7/5/2010 05:02:01 | 23.801 10/2/2010 00:15:00 | 26.5 7/6/2010 02:46:01 | 24.3413 |
| 7/5/2010 05:22:01 | 23.801 10/2/2010 00:50:00 | 26.5 7/6/2010 03:06:01 | 24.3413 |
| 7/5/2010 05:42:01 | 23.739 10/2/2010 01:25:00 | 26.5 7/6/2010 03:26:01 | 24.3413 |

|                   |        |                    |      |                   |         |
|-------------------|--------|--------------------|------|-------------------|---------|
| 7/5/2010 06:02:01 | 23.739 | 10/2/2010 02:00:00 | 26.5 | 7/6/2010 03:46:01 | 24.3413 |
| 7/5/2010 06:22:01 | 23.739 | 10/2/2010 02:35:00 | 26.5 | 7/6/2010 04:06:01 | 24.3413 |
| 7/5/2010 06:42:01 | 23.739 | 10/2/2010 03:10:00 | 26.5 | 7/6/2010 04:26:01 | 24.3413 |
| 7/5/2010 07:02:01 | 23.676 | 10/2/2010 03:45:00 | 26.5 | 7/6/2010 04:46:01 | 24.3413 |
| 7/5/2010 07:22:01 | 23.676 | 10/2/2010 04:20:00 | 26.0 | 7/6/2010 05:06:01 | 24.2793 |
| 7/5/2010 07:42:01 | 23.676 | 10/2/2010 04:55:00 | 26.0 | 7/6/2010 05:26:01 | 24.2793 |
| 7/5/2010 08:02:01 | 23.676 | 10/2/2010 05:30:00 | 26.0 | 7/6/2010 05:46:01 | 24.2793 |
| 7/5/2010 08:22:01 | 23.614 | 10/2/2010 06:05:00 | 26.0 | 7/6/2010 06:06:01 | 24.2793 |
| 7/5/2010 08:42:01 | 23.614 | 10/2/2010 06:40:00 | 26.0 | 7/6/2010 06:26:01 | 24.2793 |
| 7/5/2010 09:02:01 | 23.614 | 10/2/2010 07:15:00 | 26.0 | 7/6/2010 06:46:01 | 24.2793 |
| 7/5/2010 09:22:01 | 23.551 | 10/2/2010 07:50:00 | 26.0 | 7/6/2010 07:06:01 | 24.2793 |
| 7/5/2010 09:42:01 | 23.551 | 10/2/2010 08:25:00 | 26.0 | 7/6/2010 07:26:01 | 24.2793 |
| 7/5/2010 10:02:01 | 23.551 | 10/2/2010 09:00:00 | 25.5 | 7/6/2010 07:46:01 | 24.2163 |
| 7/5/2010 10:22:01 | 23.551 | 10/2/2010 09:35:00 | 25.5 | 7/6/2010 08:06:01 | 24.2163 |
| 7/5/2010 10:42:01 | 23.489 | 10/2/2010 10:10:00 | 25.5 | 7/6/2010 08:26:01 | 24.2163 |
| 7/5/2010 11:02:01 | 23.489 | 10/2/2010 10:45:00 | 25.5 | 7/6/2010 08:46:01 | 24.2163 |
| 7/5/2010 11:22:01 | 23.489 | 10/2/2010 11:20:00 | 25.5 | 7/6/2010 09:06:01 | 24.2163 |
| 7/5/2010 11:42:01 | 23.426 | 10/2/2010 11:55:00 | 25.5 | 7/6/2010 09:26:01 | 24.2163 |
| 7/5/2010 12:02:01 | 23.426 | 10/2/2010 12:30:00 | 25.5 | 7/6/2010 09:46:01 | 24.1543 |
| 7/5/2010 12:22:01 | 23.426 | 10/2/2010 13:05:00 | 25.5 | 7/6/2010 10:06:01 | 24.1543 |
| 7/5/2010 12:42:01 | 23.426 | 10/2/2010 13:40:00 | 26.0 | 7/6/2010 10:26:01 | 24.1543 |
| 7/5/2010 13:02:01 | 23.426 | 10/2/2010 14:15:00 | 26.0 | 7/6/2010 10:46:01 | 24.1543 |
| 7/5/2010 13:22:01 | 23.426 | 10/2/2010 14:50:00 | 26.0 | 7/6/2010 11:06:01 | 24.1543 |
| 7/5/2010 13:42:01 | 23.364 | 10/2/2010 15:25:00 | 26.0 | 7/6/2010 11:26:01 | 24.0913 |
| 7/5/2010 14:02:01 | 23.364 | 10/2/2010 16:00:00 | 26.0 | 7/6/2010 11:46:01 | 24.0913 |
| 7/5/2010 14:22:01 | 23.426 | 10/2/2010 16:35:00 | 26.0 | 7/6/2010 12:06:01 | 24.0913 |
| 7/5/2010 14:42:01 | 23.426 | 10/2/2010 17:10:00 | 26.5 | 7/6/2010 12:26:01 | 24.0913 |
| 7/5/2010 15:02:01 | 23.426 | 10/2/2010 17:45:00 | 26.5 | 7/6/2010 12:46:01 | 24.0293 |
| 7/5/2010 15:22:01 | 23.426 | 10/2/2010 18:20:00 | 26.5 | 7/6/2010 13:06:01 | 24.0293 |
| 7/5/2010 15:42:01 | 23.426 | 10/2/2010 18:55:00 | 26.5 | 7/6/2010 13:26:01 | 24.0293 |
| 7/5/2010 16:02:01 | 23.426 | 10/2/2010 19:30:00 | 26.5 | 7/6/2010 13:46:01 | 24.0293 |
| 7/5/2010 16:22:01 | 23.489 | 10/2/2010 20:05:00 | 26.5 | 7/6/2010 14:06:01 | 24.0293 |
| 7/5/2010 16:42:01 | 23.489 | 10/2/2010 20:40:00 | 26.5 | 7/6/2010 14:26:01 | 24.0293 |
| 7/5/2010 17:02:01 | 23.489 | 10/2/2010 21:15:00 | 26.5 | 7/6/2010 14:46:01 | 23.9663 |
| 7/5/2010 17:22:01 | 23.551 | 10/2/2010 21:50:00 | 26.5 | 7/6/2010 15:06:01 | 23.9663 |
| 7/5/2010 17:42:01 | 23.551 | 10/2/2010 22:25:00 | 26.5 | 7/6/2010 15:26:01 | 23.9663 |
| 7/5/2010 18:02:01 | 23.614 | 10/2/2010 23:00:00 | 26.5 | 7/6/2010 15:46:01 | 23.9663 |
| 7/5/2010 18:22:01 | 23.614 | 10/2/2010 23:35:00 | 26.5 | 7/6/2010 16:06:01 | 23.9663 |
| 7/5/2010 18:42:01 | 23.614 | 10/3/2010 00:10:00 | 26.5 | 7/6/2010 16:26:01 | 23.9663 |
| 7/5/2010 19:02:01 | 23.676 | 10/3/2010 00:45:00 | 26.5 | 7/6/2010 16:46:01 | 23.9663 |
| 7/5/2010 19:22:01 | 23.676 | 10/3/2010 01:20:00 | 26.5 | 7/6/2010 17:06:01 | 23.9663 |
| 7/5/2010 19:42:01 | 23.676 | 10/3/2010 01:55:00 | 26.5 | 7/6/2010 17:26:01 | 23.9663 |
| 7/5/2010 20:02:01 | 23.739 | 10/3/2010 02:30:00 | 26.5 | 7/6/2010 17:46:01 | 23.9663 |
| 7/5/2010 20:22:01 | 23.739 | 10/3/2010 03:05:00 | 26.5 | 7/6/2010 18:06:01 | 23.9663 |
| 7/5/2010 20:42:01 | 23.739 | 10/3/2010 03:40:00 | 26.5 | 7/6/2010 18:26:01 | 23.9663 |
| 7/5/2010 21:02:01 | 23.739 | 10/3/2010 04:15:00 | 26.5 | 7/6/2010 18:46:01 | 23.9663 |
| 7/5/2010 21:22:01 | 23.739 | 10/3/2010 04:50:00 | 26.0 | 7/6/2010 19:06:01 | 23.9663 |
| 7/5/2010 21:42:01 | 23.739 | 10/3/2010 05:25:00 | 26.0 | 7/6/2010 19:26:01 | 23.9663 |
| 7/5/2010 22:02:01 | 23.801 | 10/3/2010 06:00:00 | 26.0 | 7/6/2010 19:46:01 | 23.9663 |
| 7/5/2010 22:22:01 | 23.801 | 10/3/2010 06:35:00 | 26.0 | 7/6/2010 20:06:01 | 23.9663 |



|                   |        |                    |      |                   |         |
|-------------------|--------|--------------------|------|-------------------|---------|
| 7/5/2010 22:42:01 | 23.801 | 10/3/2010 07:10:00 | 26.0 | 7/6/2010 20:26:01 | 24.0293 |
| 7/5/2010 23:02:01 | 23.801 | 10/3/2010 07:45:00 | 26.0 | 7/6/2010 20:46:01 | 24.0293 |
| 7/5/2010 23:22:01 | 23.801 | 10/3/2010 08:20:00 | 26.0 | 7/6/2010 21:06:01 | 24.0293 |
| 7/5/2010 23:42:01 | 23.801 | 10/3/2010 08:55:00 | 26.0 | 7/6/2010 21:26:01 | 24.0293 |
| 7/6/2010 00:02:01 | 23.801 | 10/3/2010 09:30:00 | 26.0 | 7/6/2010 21:46:01 | 24.0293 |
| 7/6/2010 00:22:01 | 23.801 | 10/3/2010 10:05:00 | 25.5 | 7/6/2010 22:06:01 | 24.0293 |
| 7/6/2010 00:42:01 | 23.739 | 10/3/2010 10:40:00 | 26.0 | 7/6/2010 22:26:01 | 24.0293 |
| 7/6/2010 01:02:01 | 23.739 | 10/3/2010 11:15:00 | 26.0 | 7/6/2010 22:46:01 | 24.0293 |
| 7/6/2010 01:22:01 | 23.739 | 10/3/2010 11:50:00 | 26.0 | 7/6/2010 23:06:01 | 24.0913 |
| 7/6/2010 01:42:01 | 23.739 | 10/3/2010 12:25:00 | 26.0 | 7/6/2010 23:26:01 | 24.0913 |
| 7/6/2010 02:02:01 | 23.739 | 10/3/2010 13:00:00 | 26.0 | 7/6/2010 23:46:01 | 24.0913 |
| 7/6/2010 02:22:01 | 23.739 | 10/3/2010 13:35:00 | 26.0 | 7/7/2010 00:06:01 | 24.0913 |
| 7/6/2010 02:42:01 | 23.739 | 10/3/2010 14:10:00 | 26.0 | 7/7/2010 00:26:01 | 24.0913 |
| 7/6/2010 03:02:01 | 23.676 | 10/3/2010 14:45:00 | 26.0 | 7/7/2010 00:46:01 | 24.0913 |
| 7/6/2010 03:22:01 | 23.676 | 10/3/2010 15:20:00 | 26.0 | 7/7/2010 01:06:01 | 24.1543 |
| 7/6/2010 03:42:01 | 23.676 | 10/3/2010 15:55:00 | 26.5 | 7/7/2010 01:26:01 | 24.1543 |
| 7/6/2010 04:02:01 | 23.676 | 10/3/2010 16:30:00 | 26.5 | 7/7/2010 01:46:01 | 24.1543 |
| 7/6/2010 04:22:01 | 23.676 | 10/3/2010 17:05:00 | 26.5 | 7/7/2010 02:06:01 | 24.1543 |
| 7/6/2010 04:42:01 | 23.614 | 10/3/2010 17:40:00 | 26.5 | 7/7/2010 02:26:01 | 24.1543 |
| 7/6/2010 05:02:01 | 23.614 | 10/3/2010 18:15:00 | 26.5 | 7/7/2010 02:46:01 | 24.1543 |
| 7/6/2010 05:22:01 | 23.614 | 10/3/2010 18:50:00 | 26.5 | 7/7/2010 03:06:01 | 24.1543 |
| 7/6/2010 05:42:01 | 23.551 | 10/3/2010 19:25:00 | 26.5 | 7/7/2010 03:26:01 | 24.1543 |
| 7/6/2010 06:02:01 | 23.551 | 10/3/2010 20:00:00 | 26.5 | 7/7/2010 03:46:01 | 24.1543 |
| 7/6/2010 06:22:01 | 23.551 | 10/3/2010 20:35:00 | 26.5 | 7/7/2010 04:06:01 | 24.1543 |
| 7/6/2010 06:42:01 | 23.551 | 10/3/2010 21:10:00 | 27.0 | 7/7/2010 04:26:01 | 24.1543 |
| 7/6/2010 07:02:01 | 23.489 | 10/3/2010 21:45:00 | 27.0 | 7/7/2010 04:46:01 | 24.1543 |
| 7/6/2010 07:22:01 | 23.489 | 10/3/2010 22:20:00 | 27.0 | 7/7/2010 05:06:01 | 24.1543 |
| 7/6/2010 07:42:01 | 23.489 | 10/3/2010 22:55:00 | 27.0 | 7/7/2010 05:26:01 | 24.1543 |
| 7/6/2010 08:02:01 | 23.426 | 10/3/2010 23:30:00 | 27.0 | 7/7/2010 05:46:01 | 24.1543 |
| 7/6/2010 08:22:01 | 23.426 | 10/4/2010 00:05:00 | 27.0 | 7/7/2010 06:06:01 | 24.1543 |
| 7/6/2010 08:42:01 | 23.364 | 10/4/2010 00:40:00 | 27.0 | 7/7/2010 06:26:01 | 24.1543 |
| 7/6/2010 09:02:01 | 23.364 | 10/4/2010 01:15:00 | 27.0 | 7/7/2010 06:46:01 | 24.1543 |
| 7/6/2010 09:22:01 | 23.364 | 10/4/2010 01:50:00 | 26.5 | 7/7/2010 07:06:01 | 24.1543 |
| 7/6/2010 09:42:01 | 23.301 | 10/4/2010 02:25:00 | 26.5 | 7/7/2010 07:26:01 | 24.1543 |
| 7/6/2010 10:02:01 | 23.301 | 10/4/2010 03:00:00 | 26.5 | 7/7/2010 07:46:01 | 24.1543 |
| 7/6/2010 10:22:01 | 23.239 | 10/4/2010 03:35:00 | 26.5 | 7/7/2010 08:06:01 | 24.1543 |
| 7/6/2010 10:42:01 | 23.239 | 10/4/2010 04:10:00 | 26.5 | 7/7/2010 08:26:01 | 24.1543 |
| 7/6/2010 11:02:01 | 23.239 | 10/4/2010 04:45:00 | 26.5 | 7/7/2010 08:46:01 | 24.1543 |
| 7/6/2010 11:22:01 | 23.176 | 10/4/2010 05:20:00 | 26.5 | 7/7/2010 09:06:01 | 24.1543 |
| 7/6/2010 11:42:01 | 23.176 | 10/4/2010 05:55:00 | 26.5 | 7/7/2010 09:26:01 | 24.1543 |
| 7/6/2010 12:02:01 | 23.176 | 10/4/2010 06:30:00 | 26.5 | 7/7/2010 09:46:01 | 24.1543 |
| 7/6/2010 12:22:01 | 23.176 | 10/4/2010 07:05:00 | 26.5 | 7/7/2010 10:06:01 | 24.0913 |
| 7/6/2010 12:42:01 | 23.114 | 10/4/2010 07:40:00 | 26.5 | 7/7/2010 10:26:01 | 24.0913 |
| 7/6/2010 13:02:01 | 23.114 | 10/4/2010 08:15:00 | 26.0 | 7/7/2010 10:46:01 | 24.0913 |
| 7/6/2010 13:22:01 | 23.114 | 10/4/2010 08:50:00 | 26.0 | 7/7/2010 11:06:01 | 24.0913 |
| 7/6/2010 13:42:01 | 23.114 | 10/4/2010 09:25:00 | 26.0 | 7/7/2010 11:26:01 | 24.0913 |
| 7/6/2010 14:02:01 | 23.114 | 10/4/2010 10:00:00 | 26.0 | 7/7/2010 11:46:01 | 24.0913 |
| 7/6/2010 14:22:01 | 23.114 | 10/4/2010 10:35:00 | 26.0 | 7/7/2010 12:06:01 | 24.0913 |
| 7/6/2010 14:42:01 | 23.114 | 10/4/2010 11:10:00 | 26.0 | 7/7/2010 12:26:01 | 24.0293 |
| 7/6/2010 15:02:01 | 23.114 | 10/4/2010 11:45:00 | 26.0 | 7/7/2010 12:46:01 | 24.0293 |

|                   |        |                    |      |                   |         |
|-------------------|--------|--------------------|------|-------------------|---------|
| 7/6/2010 15:22:01 | 23.114 | 10/4/2010 12:20:00 | 26.0 | 7/7/2010 13:06:01 | 24.0293 |
| 7/6/2010 15:42:01 | 23.176 | 10/4/2010 12:55:00 | 26.0 | 7/7/2010 13:26:01 | 24.0293 |
| 7/6/2010 16:02:01 | 23.176 | 10/4/2010 13:30:00 | 26.5 | 7/7/2010 13:46:01 | 24.0293 |
| 7/6/2010 16:22:01 | 23.239 | 10/4/2010 14:05:00 | 26.5 | 7/7/2010 14:06:01 | 24.0293 |
| 7/6/2010 16:42:01 | 23.239 | 10/4/2010 14:40:00 | 26.5 | 7/7/2010 14:26:01 | 24.0293 |
| 7/6/2010 17:02:01 | 23.239 | 10/4/2010 15:15:00 | 26.5 | 7/7/2010 14:46:01 | 24.0293 |
| 7/6/2010 17:22:01 | 23.301 | 10/4/2010 15:50:00 | 26.5 | 7/7/2010 15:06:01 | 24.0293 |
| 7/6/2010 17:42:01 | 23.301 | 10/4/2010 16:25:00 | 26.5 | 7/7/2010 15:26:01 | 24.0293 |
| 7/6/2010 18:02:01 | 23.364 | 10/4/2010 17:00:00 | 27.0 | 7/7/2010 15:46:01 | 24.0293 |
| 7/6/2010 18:22:01 | 23.364 | 10/4/2010 17:35:00 | 27.0 | 7/7/2010 16:06:01 | 24.0293 |
| 7/6/2010 18:42:01 | 23.364 | 10/4/2010 18:10:00 | 27.0 | 7/7/2010 16:26:01 | 24.0293 |
| 7/6/2010 19:02:01 | 23.426 | 10/4/2010 18:45:00 | 27.0 | 7/7/2010 16:46:01 | 24.0293 |
| 7/6/2010 19:22:01 | 23.426 | 10/4/2010 19:20:00 | 27.0 | 7/7/2010 17:06:01 | 24.0293 |
| 7/6/2010 19:42:01 | 23.489 | 10/4/2010 19:55:00 | 27.0 | 7/7/2010 17:26:01 | 24.0293 |
| 7/6/2010 20:02:01 | 23.489 | 10/4/2010 20:30:00 | 27.0 | 7/7/2010 17:46:01 | 24.0293 |
| 7/6/2010 20:22:01 | 23.489 | 10/4/2010 21:05:00 | 27.0 | 7/7/2010 18:06:01 | 24.0293 |
| 7/6/2010 20:42:01 | 23.551 | 10/4/2010 21:40:00 | 27.0 | 7/7/2010 18:26:01 | 24.0293 |
| 7/6/2010 21:02:01 | 23.551 | 10/4/2010 22:15:00 | 27.0 | 7/7/2010 18:46:01 | 24.0293 |
| 7/6/2010 21:22:01 | 23.551 | 10/4/2010 22:50:00 | 27.0 | 7/7/2010 19:06:01 | 24.0293 |
| 7/6/2010 21:42:01 | 23.551 | 10/4/2010 23:25:00 | 27.0 | 7/7/2010 19:26:01 | 24.0293 |
| 7/6/2010 22:02:01 | 23.614 | 10/5/2010 00:00:00 | 27.0 | 7/7/2010 19:46:01 | 24.0293 |
| 7/6/2010 22:22:01 | 23.614 | 10/5/2010 00:35:00 | 27.0 | 7/7/2010 20:06:01 | 24.0293 |
| 7/6/2010 22:42:01 | 23.614 | 10/5/2010 01:10:00 | 27.0 | 7/7/2010 20:26:01 | 24.0913 |
| 7/6/2010 23:02:01 | 23.614 | 10/5/2010 01:45:00 | 27.0 | 7/7/2010 20:46:01 | 24.0913 |
| 7/6/2010 23:22:01 | 23.614 | 10/5/2010 02:20:00 | 27.0 | 7/7/2010 21:06:01 | 24.0913 |
| 7/6/2010 23:42:01 | 23.614 | 10/5/2010 02:55:00 | 27.0 | 7/7/2010 21:26:01 | 24.0913 |
| 7/7/2010 00:02:01 | 23.614 | 10/5/2010 03:30:00 | 26.5 | 7/7/2010 21:46:01 | 24.0913 |
| 7/7/2010 00:22:01 | 23.614 | 10/5/2010 04:05:00 | 26.5 | 7/7/2010 22:06:01 | 24.0913 |
| 7/7/2010 00:42:01 | 23.614 | 10/5/2010 04:40:00 | 26.5 | 7/7/2010 22:26:01 | 24.1543 |
| 7/7/2010 01:02:01 | 23.614 | 10/5/2010 05:15:00 | 26.5 | 7/7/2010 22:46:01 | 24.1543 |
| 7/7/2010 01:22:01 | 23.614 | 10/5/2010 05:50:00 | 26.5 | 7/7/2010 23:06:01 | 24.1543 |
| 7/7/2010 01:42:01 | 23.614 | 10/5/2010 06:25:00 | 26.5 | 7/7/2010 23:26:01 | 24.1543 |
| 7/7/2010 02:02:01 | 23.614 | 10/5/2010 07:00:00 | 26.5 | 7/7/2010 23:46:01 | 24.1543 |
| 7/7/2010 02:22:01 | 23.614 | 10/5/2010 07:35:00 | 26.5 | 7/8/2010 00:06:01 | 24.1543 |
| 7/7/2010 02:42:01 | 23.614 | 10/5/2010 08:10:00 | 26.5 | 7/8/2010 00:26:01 | 24.2163 |
| 7/7/2010 03:02:01 | 23.614 | 10/5/2010 08:45:00 | 26.5 | 7/8/2010 00:46:01 | 24.2163 |
| 7/7/2010 03:22:01 | 23.614 | 10/5/2010 09:20:00 | 26.5 | 7/8/2010 01:06:01 | 24.2163 |
| 7/7/2010 03:42:01 | 23.614 | 10/5/2010 09:55:00 | 26.0 | 7/8/2010 01:26:01 | 24.2163 |
| 7/7/2010 04:02:01 | 23.614 | 10/5/2010 10:30:00 | 26.0 | 7/8/2010 01:46:01 | 24.2163 |
| 7/7/2010 04:22:01 | 23.614 | 10/5/2010 11:05:00 | 26.0 | 7/8/2010 02:06:01 | 24.2163 |
| 7/7/2010 04:42:01 | 23.614 | 10/5/2010 11:40:00 | 26.5 | 7/8/2010 02:26:01 | 24.2163 |
| 7/7/2010 05:02:01 | 23.551 | 10/5/2010 12:15:00 | 26.5 | 7/8/2010 02:46:01 | 24.2163 |
| 7/7/2010 05:22:01 | 23.551 | 10/5/2010 12:50:00 | 26.5 | 7/8/2010 03:06:01 | 24.2163 |
| 7/7/2010 05:42:01 | 23.551 | 10/5/2010 13:25:00 | 26.5 | 7/8/2010 03:26:01 | 24.2163 |
| 7/7/2010 06:02:01 | 23.551 | 10/5/2010 14:00:00 | 26.5 | 7/8/2010 03:46:01 | 24.2163 |
| 7/7/2010 06:22:01 | 23.551 | 10/5/2010 14:35:00 | 26.5 | 7/8/2010 04:06:01 | 24.2163 |
| 7/7/2010 06:42:01 | 23.551 | 10/5/2010 15:10:00 | 26.5 | 7/8/2010 04:26:01 | 24.2163 |
| 7/7/2010 07:02:01 | 23.551 | 10/5/2010 15:45:00 | 26.5 | 7/8/2010 04:46:01 | 24.2163 |
| 7/7/2010 07:22:01 | 23.489 | 10/5/2010 16:20:00 | 27.0 | 7/8/2010 05:06:01 | 24.2163 |
| 7/7/2010 07:42:01 | 23.489 | 10/5/2010 16:55:00 | 27.0 | 7/8/2010 05:26:01 | 24.2163 |

|                   |        |                    |      |                   |         |
|-------------------|--------|--------------------|------|-------------------|---------|
| 7/7/2010 08:02:01 | 23.489 | 10/5/2010 17:30:00 | 27.0 | 7/8/2010 05:46:01 | 24.2163 |
| 7/7/2010 08:22:01 | 23.489 | 10/5/2010 18:05:00 | 27.0 | 7/8/2010 06:06:01 | 24.2163 |
| 7/7/2010 08:42:01 | 23.489 | 10/5/2010 18:40:00 | 27.0 | 7/8/2010 06:26:01 | 24.2163 |
| 7/7/2010 09:02:01 | 23.426 | 10/5/2010 19:15:00 | 27.0 | 7/8/2010 06:46:01 | 24.2163 |
| 7/7/2010 09:22:01 | 23.426 | 10/5/2010 19:50:00 | 27.0 | 7/8/2010 07:06:01 | 24.2163 |
| 7/7/2010 09:42:01 | 23.426 | 10/5/2010 20:25:00 | 27.0 | 7/8/2010 07:26:01 | 24.2163 |
| 7/7/2010 10:02:01 | 23.426 | 10/5/2010 21:00:00 | 27.0 | 7/8/2010 07:46:01 | 24.2163 |
| 7/7/2010 10:22:01 | 23.364 | 10/5/2010 21:35:00 | 27.0 | 7/8/2010 08:06:01 | 24.2163 |
| 7/7/2010 10:42:01 | 23.364 | 10/5/2010 22:10:00 | 27.0 | 7/8/2010 08:26:01 | 24.2163 |
| 7/7/2010 11:02:01 | 23.364 | 10/5/2010 22:45:00 | 27.0 | 7/8/2010 08:46:01 | 24.1543 |
| 7/7/2010 11:22:01 | 23.364 | 10/5/2010 23:20:00 | 27.0 | 7/8/2010 09:06:01 | 24.1543 |
| 7/7/2010 11:42:01 | 23.301 | 10/5/2010 23:55:00 | 27.0 | 7/8/2010 09:26:01 | 24.1543 |
| 7/7/2010 12:02:01 | 23.301 | 10/6/2010 00:30:00 | 27.0 | 7/8/2010 09:46:01 | 24.1543 |
| 7/7/2010 12:22:01 | 23.301 | 10/6/2010 01:05:00 | 27.0 | 7/8/2010 10:06:01 | 24.1543 |
| 7/7/2010 12:42:01 | 23.301 | 10/6/2010 01:40:00 | 27.0 | 7/8/2010 10:26:01 | 24.1543 |
| 7/7/2010 13:02:01 | 23.301 | 10/6/2010 02:15:00 | 27.0 | 7/8/2010 10:46:01 | 24.1543 |
| 7/7/2010 13:22:01 | 23.301 | 10/6/2010 02:50:00 | 27.0 | 7/8/2010 11:06:01 | 24.0913 |
| 7/7/2010 13:42:01 | 23.301 | 10/6/2010 03:25:00 | 27.0 | 7/8/2010 11:26:01 | 24.0913 |
| 7/7/2010 14:02:01 | 23.301 | 10/6/2010 04:00:00 | 27.0 | 7/8/2010 11:46:01 | 24.0913 |
| 7/7/2010 14:22:01 | 23.301 | 10/6/2010 04:35:00 | 27.0 | 7/8/2010 12:06:01 | 24.0913 |
| 7/7/2010 14:42:01 | 23.301 | 10/6/2010 05:10:00 | 27.0 | 7/8/2010 12:26:01 | 24.0913 |
| 7/7/2010 15:02:01 | 23.301 | 10/6/2010 05:45:00 | 26.5 | 7/8/2010 12:46:01 | 24.0293 |
| 7/7/2010 15:22:01 | 23.364 | 10/6/2010 06:20:00 | 26.5 | 7/8/2010 13:06:01 | 24.0293 |
| 7/7/2010 15:42:01 | 23.364 | 10/6/2010 06:55:00 | 26.5 | 7/8/2010 13:26:01 | 24.0293 |
| 7/7/2010 16:02:01 | 23.364 | 10/6/2010 07:30:00 | 26.5 | 7/8/2010 13:46:01 | 24.0293 |
| 7/7/2010 16:22:01 | 23.426 | 10/6/2010 08:05:00 | 26.5 | 7/8/2010 14:06:01 | 24.0293 |
| 7/7/2010 16:42:01 | 23.426 | 10/6/2010 08:40:00 | 26.5 | 7/8/2010 14:26:01 | 24.0293 |
| 7/7/2010 17:02:01 | 23.426 | 10/6/2010 09:15:00 | 26.5 | 7/8/2010 14:46:01 | 24.0293 |
| 7/7/2010 17:22:01 | 23.489 | 10/6/2010 09:50:00 | 26.5 | 7/8/2010 15:06:01 | 24.0293 |
| 7/7/2010 17:42:01 | 23.489 | 10/6/2010 10:25:00 | 26.5 | 7/8/2010 15:26:01 | 24.0293 |
| 7/7/2010 18:02:01 | 23.551 | 10/6/2010 11:00:00 | 26.5 | 7/8/2010 15:46:01 | 24.0293 |
| 7/7/2010 18:22:01 | 23.551 | 10/6/2010 11:35:00 | 26.5 | 7/8/2010 16:06:01 | 23.9663 |
| 7/7/2010 18:42:01 | 23.551 | 10/6/2010 12:10:00 | 26.5 | 7/8/2010 16:26:01 | 23.9663 |
| 7/7/2010 19:02:01 | 23.614 | 10/6/2010 12:45:00 | 26.5 | 7/8/2010 16:46:01 | 24.0293 |
| 7/7/2010 19:22:01 | 23.614 | 10/6/2010 13:20:00 | 26.5 | 7/8/2010 17:06:01 | 24.0293 |
| 7/7/2010 19:42:01 | 23.676 | 10/6/2010 13:55:00 | 26.5 | 7/8/2010 17:26:01 | 24.0293 |
| 7/7/2010 20:02:01 | 23.676 | 10/6/2010 14:30:00 | 26.5 | 7/8/2010 17:46:01 | 24.0293 |
| 7/7/2010 20:22:01 | 23.676 | 10/6/2010 15:05:00 | 27.0 | 7/8/2010 18:06:01 | 24.0293 |
| 7/7/2010 20:42:01 | 23.676 | 10/6/2010 15:40:00 | 27.0 | 7/8/2010 18:26:01 | 24.0293 |
| 7/7/2010 21:02:01 | 23.739 | 10/6/2010 16:15:00 | 27.0 | 7/8/2010 18:46:01 | 24.0293 |
| 7/7/2010 21:22:01 | 23.739 | 10/6/2010 16:50:00 | 27.0 | 7/8/2010 19:06:01 | 24.0293 |
| 7/7/2010 21:42:01 | 23.739 | 10/6/2010 17:25:00 | 27.0 | 7/8/2010 19:26:01 | 24.0293 |
| 7/7/2010 22:02:01 | 23.739 | 10/6/2010 18:00:00 | 27.5 | 7/8/2010 19:46:01 | 24.0293 |
| 7/7/2010 22:22:01 | 23.739 | 10/6/2010 18:35:00 | 27.5 | 7/8/2010 20:06:01 | 24.0293 |
| 7/7/2010 22:42:01 | 23.801 | 10/6/2010 19:10:00 | 27.5 | 7/8/2010 20:26:01 | 24.0913 |
| 7/7/2010 23:02:01 | 23.801 | 10/6/2010 19:45:00 | 27.5 | 7/8/2010 20:46:01 | 24.0913 |
| 7/7/2010 23:22:01 | 23.801 | 10/6/2010 20:20:00 | 27.5 | 7/8/2010 21:06:01 | 24.0913 |
| 7/7/2010 23:42:01 | 23.801 | 10/6/2010 20:55:00 | 27.5 | 7/8/2010 21:26:01 | 24.0913 |
| 7/8/2010 00:02:01 | 23.801 | 10/6/2010 21:30:00 | 27.5 | 7/8/2010 21:46:01 | 24.0913 |
| 7/8/2010 00:22:01 | 23.801 | 10/6/2010 22:05:00 | 27.5 | 7/8/2010 22:06:01 | 24.0913 |

|                   |        |                    |      |                   |         |
|-------------------|--------|--------------------|------|-------------------|---------|
| 7/8/2010 00:42:01 | 23.801 | 10/6/2010 22:40:00 | 27.5 | 7/8/2010 22:26:01 | 24.1543 |
| 7/8/2010 01:02:01 | 23.801 | 10/6/2010 23:15:00 | 27.5 | 7/8/2010 22:46:01 | 24.1543 |
| 7/8/2010 01:22:01 | 23.801 | 10/6/2010 23:50:00 | 27.5 | 7/8/2010 23:06:01 | 24.1543 |
| 7/8/2010 01:42:01 | 23.801 | 10/7/2010 00:25:00 | 27.5 | 7/8/2010 23:26:01 | 24.1543 |
| 7/8/2010 02:02:01 | 23.801 | 10/7/2010 01:00:00 | 27.5 | 7/8/2010 23:46:01 | 24.1543 |
| 7/8/2010 02:22:01 | 23.801 | 10/7/2010 01:35:00 | 27.5 | 7/9/2010 00:06:01 | 24.1543 |
| 7/8/2010 02:42:01 | 23.739 | 10/7/2010 02:10:00 | 27.5 | 7/9/2010 00:26:01 | 24.1543 |
| 7/8/2010 03:02:01 | 23.739 | 10/7/2010 02:45:00 | 27.5 | 7/9/2010 00:46:01 | 24.2163 |
| 7/8/2010 03:22:01 | 23.739 | 10/7/2010 03:20:00 | 27.5 | 7/9/2010 01:06:01 | 24.2163 |
| 7/8/2010 03:42:01 | 23.739 | 10/7/2010 03:55:00 | 27.5 | 7/9/2010 01:26:01 | 24.2163 |
| 7/8/2010 04:02:01 | 23.739 | 10/7/2010 04:30:00 | 27.5 | 7/9/2010 01:46:01 | 24.2163 |
| 7/8/2010 04:22:01 | 23.739 | 10/7/2010 05:05:00 | 27.0 | 7/9/2010 02:06:01 | 24.2163 |
| 7/8/2010 04:42:01 | 23.676 | 10/7/2010 05:40:00 | 27.0 | 7/9/2010 02:26:01 | 24.2163 |
| 7/8/2010 05:02:01 | 23.676 | 10/7/2010 06:15:00 | 27.0 | 7/9/2010 02:46:01 | 24.2163 |
| 7/8/2010 05:22:01 | 23.676 | 10/7/2010 06:50:00 | 27.0 | 7/9/2010 03:06:01 | 24.2163 |
| 7/8/2010 05:42:01 | 23.676 | 10/7/2010 07:25:00 | 27.0 | 7/9/2010 03:26:01 | 24.2163 |
| 7/8/2010 06:02:01 | 23.614 | 10/7/2010 08:00:00 | 27.0 | 7/9/2010 03:46:01 | 24.2163 |
| 7/8/2010 06:22:01 | 23.614 | 10/7/2010 08:35:00 | 27.0 | 7/9/2010 04:06:01 | 24.2163 |
| 7/8/2010 06:42:01 | 23.614 | 10/7/2010 09:10:00 | 27.0 | 7/9/2010 04:26:01 | 24.2163 |
| 7/8/2010 07:02:01 | 23.614 | 10/7/2010 09:45:00 | 27.0 | 7/9/2010 04:46:01 | 24.2163 |
| 7/8/2010 07:22:01 | 23.551 | 10/7/2010 10:20:00 | 27.0 | 7/9/2010 05:06:01 | 24.2163 |
| 7/8/2010 07:42:01 | 23.551 | 10/7/2010 10:55:00 | 27.0 | 7/9/2010 05:26:01 | 24.2163 |
| 7/8/2010 08:02:01 | 23.551 | 10/7/2010 11:30:00 | 27.0 | 7/9/2010 05:46:01 | 24.2163 |
| 7/8/2010 08:22:01 | 23.489 | 10/7/2010 12:05:00 | 27.0 | 7/9/2010 06:06:01 | 24.2163 |
| 7/8/2010 08:42:01 | 23.489 | 10/7/2010 12:40:00 | 27.0 | 7/9/2010 06:26:01 | 24.2163 |
| 7/8/2010 09:02:01 | 23.489 | 10/7/2010 13:15:00 | 27.0 | 7/9/2010 06:46:01 | 24.2163 |
| 7/8/2010 09:22:01 | 23.426 | 10/7/2010 13:50:00 | 27.0 | 7/9/2010 07:06:01 | 24.2163 |
| 7/8/2010 09:42:01 | 23.426 | 10/7/2010 14:25:00 | 27.0 | 7/9/2010 07:26:01 | 24.2163 |
| 7/8/2010 10:02:01 | 23.426 | 10/7/2010 15:00:00 | 27.0 | 7/9/2010 07:46:01 | 24.2163 |
| 7/8/2010 10:22:01 | 23.364 | 10/7/2010 15:35:00 | 27.5 | 7/9/2010 08:06:01 | 24.2163 |
| 7/8/2010 10:42:01 | 23.364 | 10/7/2010 16:10:00 | 27.5 | 7/9/2010 08:26:01 | 24.2163 |
| 7/8/2010 11:02:01 | 23.364 | 10/7/2010 16:45:00 | 27.5 | 7/9/2010 08:46:01 | 24.1543 |
| 7/8/2010 11:22:01 | 23.364 | 10/7/2010 17:20:00 | 27.5 | 7/9/2010 09:06:01 | 24.1543 |
| 7/8/2010 11:42:01 | 23.301 | 10/7/2010 17:55:00 | 27.5 | 7/9/2010 09:26:01 | 24.1543 |
| 7/8/2010 12:02:01 | 23.301 | 10/7/2010 18:30:00 | 27.5 | 7/9/2010 09:46:01 | 24.1543 |
| 7/8/2010 12:22:01 | 23.301 | 10/7/2010 19:05:00 | 27.5 | 7/9/2010 10:06:01 | 24.1543 |
| 7/8/2010 12:42:01 | 23.301 | 10/7/2010 19:40:00 | 27.5 | 7/9/2010 10:26:01 | 24.1543 |
| 7/8/2010 13:02:01 | 23.301 | 10/7/2010 20:15:00 | 27.5 | 7/9/2010 10:46:01 | 24.1543 |
| 7/8/2010 13:22:01 | 23.301 | 10/7/2010 20:50:00 | 27.5 | 7/9/2010 11:06:01 | 24.1543 |
| 7/8/2010 13:42:01 | 23.301 | 10/7/2010 21:25:00 | 27.5 | 7/9/2010 11:26:01 | 24.1543 |
| 7/8/2010 14:02:01 | 23.301 | 10/7/2010 22:00:00 | 27.5 | 7/9/2010 11:46:01 | 24.0913 |
| 7/8/2010 14:22:01 | 23.301 | 10/7/2010 22:35:00 | 27.5 | 7/9/2010 12:06:01 | 24.0913 |
| 7/8/2010 14:42:01 | 23.301 | 10/7/2010 23:10:00 | 27.5 | 7/9/2010 12:26:01 | 24.0913 |
| 7/8/2010 15:02:01 | 23.301 | 10/7/2010 23:45:00 | 27.5 | 7/9/2010 12:46:01 | 24.0913 |
| 7/8/2010 15:22:01 | 23.301 | 10/8/2010 00:20:00 | 27.5 | 7/9/2010 13:06:01 | 24.0913 |
| 7/8/2010 15:42:01 | 23.364 | 10/8/2010 00:55:00 | 27.5 | 7/9/2010 13:26:01 | 24.0913 |
| 7/8/2010 16:02:01 | 23.364 | 10/8/2010 01:30:00 | 27.5 | 7/9/2010 13:46:01 | 24.0293 |
| 7/8/2010 16:22:01 | 23.364 | 10/8/2010 02:05:00 | 27.5 | 7/9/2010 14:06:01 | 24.0293 |
| 7/8/2010 16:42:01 | 23.426 | 10/8/2010 02:40:00 | 27.5 | 7/9/2010 14:26:01 | 24.0293 |
| 7/8/2010 17:02:01 | 23.426 | 10/8/2010 03:15:00 | 27.5 | 7/9/2010 14:46:01 | 24.0293 |

|                   |        |                    |      |                    |         |
|-------------------|--------|--------------------|------|--------------------|---------|
| 7/8/2010 17:22:01 | 23.489 | 10/8/2010 03:50:00 | 27.5 | 7/9/2010 15:06:01  | 24.0293 |
| 7/8/2010 17:42:01 | 23.489 | 10/8/2010 04:25:00 | 27.5 | 7/9/2010 15:26:01  | 24.0293 |
| 7/8/2010 18:02:01 | 23.489 | 10/8/2010 05:00:00 | 27.5 | 7/9/2010 15:46:01  | 24.0293 |
| 7/8/2010 18:22:01 | 23.551 | 10/8/2010 05:35:00 | 27.5 | 7/9/2010 16:06:01  | 24.0293 |
| 7/8/2010 18:42:01 | 23.551 | 10/8/2010 06:10:00 | 27.5 | 7/9/2010 16:26:01  | 24.0293 |
| 7/8/2010 19:02:01 | 23.614 | 10/8/2010 06:45:00 | 27.0 | 7/9/2010 16:46:01  | 24.0293 |
| 7/8/2010 19:22:01 | 23.614 | 10/8/2010 07:20:00 | 27.0 | 7/9/2010 17:06:01  | 24.0293 |
| 7/8/2010 19:42:01 | 23.614 | 10/8/2010 07:55:00 | 27.0 | 7/9/2010 17:26:01  | 24.0293 |
| 7/8/2010 20:02:01 | 23.676 | 10/8/2010 08:30:00 | 27.0 | 7/9/2010 17:46:01  | 24.0293 |
| 7/8/2010 20:22:01 | 23.676 | 10/8/2010 09:05:00 | 27.0 | 7/9/2010 18:06:01  | 24.0293 |
| 7/8/2010 20:42:01 | 23.676 | 10/8/2010 09:40:00 | 27.0 | 7/9/2010 18:26:01  | 24.0293 |
| 7/8/2010 21:02:01 | 23.739 | 10/8/2010 10:15:00 | 27.0 | 7/9/2010 18:46:01  | 24.0913 |
| 7/8/2010 21:22:01 | 23.739 | 10/8/2010 10:50:00 | 27.0 | 7/9/2010 19:06:01  | 24.0913 |
| 7/8/2010 21:42:01 | 23.739 | 10/8/2010 11:25:00 | 27.0 | 7/9/2010 19:26:01  | 24.0913 |
| 7/8/2010 22:02:01 | 23.739 | 10/8/2010 12:00:00 | 27.0 | 7/9/2010 19:46:01  | 24.0913 |
| 7/8/2010 22:22:01 | 23.739 | 10/8/2010 12:35:00 | 27.0 | 7/9/2010 20:06:01  | 24.0913 |
| 7/8/2010 22:42:01 | 23.801 | 10/8/2010 13:10:00 | 27.5 | 7/9/2010 20:26:01  | 24.0913 |
| 7/8/2010 23:02:01 | 23.801 | 10/8/2010 13:45:00 | 27.5 | 7/9/2010 20:46:01  | 24.0913 |
| 7/8/2010 23:22:01 | 23.801 | 10/8/2010 14:20:00 | 27.5 | 7/9/2010 21:06:01  | 24.1543 |
| 7/8/2010 23:42:01 | 23.801 | 10/8/2010 14:55:00 | 27.5 | 7/9/2010 21:26:01  | 24.1543 |
| 7/9/2010 00:02:01 | 23.801 | 10/8/2010 15:30:00 | 27.5 | 7/9/2010 21:46:01  | 24.1543 |
| 7/9/2010 00:22:01 | 23.801 | 10/8/2010 16:05:00 | 27.5 | 7/9/2010 22:06:01  | 24.1543 |
| 7/9/2010 00:42:01 | 23.801 | 10/8/2010 16:40:00 | 27.5 | 7/9/2010 22:26:01  | 24.2163 |
| 7/9/2010 01:02:01 | 23.801 | 10/8/2010 17:15:00 | 27.5 | 7/9/2010 22:46:01  | 24.2163 |
| 7/9/2010 01:22:01 | 23.801 | 10/8/2010 17:50:00 | 28.0 | 7/9/2010 23:06:01  | 24.2163 |
| 7/9/2010 01:42:01 | 23.801 | 10/8/2010 18:25:00 | 28.0 | 7/9/2010 23:26:01  | 24.2163 |
| 7/9/2010 02:02:01 | 23.801 | 10/8/2010 19:00:00 | 28.0 | 7/9/2010 23:46:01  | 24.2163 |
| 7/9/2010 02:22:01 | 23.801 | 10/8/2010 19:35:00 | 28.0 | 7/10/2010 00:06:01 | 24.2163 |
| 7/9/2010 02:42:01 | 23.739 | 10/8/2010 20:10:00 | 28.0 | 7/10/2010 00:26:01 | 24.2163 |
| 7/9/2010 03:02:01 | 23.739 | 10/8/2010 20:45:00 | 28.0 | 7/10/2010 00:46:01 | 24.2793 |
| 7/9/2010 03:22:01 | 23.739 | 10/8/2010 21:20:00 | 28.0 | 7/10/2010 01:06:01 | 24.2793 |
| 7/9/2010 03:42:01 | 23.739 | 10/8/2010 21:55:00 | 28.0 | 7/10/2010 01:26:01 | 24.2793 |
| 7/9/2010 04:02:01 | 23.739 | 10/8/2010 22:30:00 | 28.0 | 7/10/2010 01:46:01 | 24.2793 |
| 7/9/2010 04:22:01 | 23.739 | 10/8/2010 23:05:00 | 28.0 | 7/10/2010 02:06:01 | 24.2793 |
| 7/9/2010 04:42:01 | 23.676 | 10/8/2010 23:40:00 | 28.0 | 7/10/2010 02:26:01 | 24.2793 |
| 7/9/2010 05:02:01 | 23.676 | 10/9/2010 00:15:00 | 28.0 | 7/10/2010 02:46:01 | 24.2793 |
| 7/9/2010 05:22:01 | 23.676 | 10/9/2010 00:50:00 | 28.0 | 7/10/2010 03:06:01 | 24.2793 |
| 7/9/2010 05:42:01 | 23.676 | 10/9/2010 01:25:00 | 27.5 | 7/10/2010 03:26:01 | 24.3413 |
| 7/9/2010 06:02:01 | 23.676 | 10/9/2010 02:00:00 | 28.0 | 7/10/2010 03:46:01 | 24.3413 |
| 7/9/2010 06:22:01 | 23.614 | 10/9/2010 02:35:00 | 27.5 | 7/10/2010 04:06:01 | 24.3413 |
| 7/9/2010 06:42:01 | 23.614 | 10/9/2010 03:10:00 | 27.5 | 7/10/2010 04:26:01 | 24.3413 |
| 7/9/2010 07:02:01 | 23.614 | 10/9/2010 03:45:00 | 27.5 | 7/10/2010 04:46:01 | 24.3413 |
| 7/9/2010 07:22:01 | 23.614 | 10/9/2010 04:20:00 | 27.5 | 7/10/2010 05:06:01 | 24.3413 |
| 7/9/2010 07:42:01 | 23.551 | 10/9/2010 04:55:00 | 27.5 | 7/10/2010 05:26:01 | 24.3413 |
| 7/9/2010 08:02:01 | 23.551 | 10/9/2010 05:30:00 | 27.5 | 7/10/2010 05:46:01 | 24.3413 |
| 7/9/2010 08:22:01 | 23.551 | 10/9/2010 06:05:00 | 27.5 | 7/10/2010 06:06:01 | 24.3413 |
| 7/9/2010 08:42:01 | 23.551 | 10/9/2010 06:40:00 | 27.5 | 7/10/2010 06:26:01 | 24.3413 |
| 7/9/2010 09:02:01 | 23.551 | 10/9/2010 07:15:00 | 27.5 | 7/10/2010 06:46:01 | 24.3413 |
| 7/9/2010 09:22:01 | 23.489 | 10/9/2010 07:50:00 | 27.5 | 7/10/2010 07:06:01 | 24.3413 |
| 7/9/2010 09:42:01 | 23.489 | 10/9/2010 08:25:00 | 27.5 | 7/10/2010 07:26:01 | 24.3413 |

|                    |        |                     |      |                    |         |
|--------------------|--------|---------------------|------|--------------------|---------|
| 7/9/2010 10:02:01  | 23.489 | 10/9/2010 09:00:00  | 27.5 | 7/10/2010 07:46:01 | 24.3413 |
| 7/9/2010 10:22:01  | 23.489 | 10/9/2010 09:35:00  | 27.5 | 7/10/2010 08:06:01 | 24.3413 |
| 7/9/2010 10:42:01  | 23.426 | 10/9/2010 10:10:00  | 27.5 | 7/10/2010 08:26:01 | 24.3413 |
| 7/9/2010 11:02:01  | 23.426 | 10/9/2010 10:45:00  | 27.5 | 7/10/2010 08:46:01 | 24.3413 |
| 7/9/2010 11:22:01  | 23.426 | 10/9/2010 11:20:00  | 27.5 | 7/10/2010 09:06:01 | 24.3413 |
| 7/9/2010 11:42:01  | 23.426 | 10/9/2010 11:55:00  | 27.5 | 7/10/2010 09:26:01 | 24.3413 |
| 7/9/2010 12:02:01  | 23.364 | 10/9/2010 12:30:00  | 27.5 | 7/10/2010 09:46:01 | 24.3413 |
| 7/9/2010 12:22:01  | 23.364 | 10/9/2010 13:05:00  | 27.5 | 7/10/2010 10:06:01 | 24.2793 |
| 7/9/2010 12:42:01  | 23.364 | 10/9/2010 13:40:00  | 27.5 | 7/10/2010 10:26:01 | 24.2793 |
| 7/9/2010 13:02:01  | 23.364 | 10/9/2010 14:15:00  | 27.5 | 7/10/2010 10:46:01 | 24.2793 |
| 7/9/2010 13:22:01  | 23.364 | 10/9/2010 14:50:00  | 27.5 | 7/10/2010 11:06:01 | 24.2793 |
| 7/9/2010 13:42:01  | 23.364 | 10/9/2010 15:25:00  | 27.5 | 7/10/2010 11:26:01 | 24.2793 |
| 7/9/2010 14:02:01  | 23.364 | 10/9/2010 16:00:00  | 27.5 | 7/10/2010 11:46:01 | 24.2793 |
| 7/9/2010 14:22:01  | 23.364 | 10/9/2010 16:35:00  | 27.5 | 7/10/2010 12:06:01 | 24.2793 |
| 7/9/2010 14:42:01  | 23.364 | 10/9/2010 17:10:00  | 27.5 | 7/10/2010 12:26:01 | 24.2793 |
| 7/9/2010 15:02:01  | 23.364 | 10/9/2010 17:45:00  | 28.0 | 7/10/2010 12:46:01 | 24.2793 |
| 7/9/2010 15:22:01  | 23.426 | 10/9/2010 18:20:00  | 28.0 | 7/10/2010 13:06:01 | 24.2793 |
| 7/9/2010 15:42:01  | 23.426 | 10/9/2010 18:55:00  | 28.0 | 7/10/2010 13:26:01 | 24.2163 |
| 7/9/2010 16:02:01  | 23.426 | 10/9/2010 19:30:00  | 27.5 | 7/10/2010 13:46:01 | 24.2163 |
| 7/9/2010 16:22:01  | 23.489 | 10/9/2010 20:05:00  | 28.0 | 7/10/2010 14:06:01 | 24.2163 |
| 7/9/2010 16:42:01  | 23.489 | 10/9/2010 20:40:00  | 28.0 | 7/10/2010 14:26:01 | 24.2163 |
| 7/9/2010 17:02:01  | 23.551 | 10/9/2010 21:15:00  | 28.0 | 7/10/2010 14:46:01 | 24.2163 |
| 7/9/2010 17:22:01  | 23.551 | 10/9/2010 21:50:00  | 28.0 | 7/10/2010 15:06:01 | 24.2163 |
| 7/9/2010 17:42:01  | 23.614 | 10/9/2010 22:25:00  | 28.0 | 7/10/2010 15:26:01 | 24.2163 |
| 7/9/2010 18:02:01  | 23.614 | 10/9/2010 23:00:00  | 28.0 | 7/10/2010 15:46:01 | 24.2163 |
| 7/9/2010 18:22:01  | 23.676 | 10/9/2010 23:35:00  | 28.0 | 7/10/2010 16:06:01 | 24.2163 |
| 7/9/2010 18:42:01  | 23.676 | 10/10/2010 00:10:00 | 28.0 | 7/10/2010 16:26:01 | 24.2163 |
| 7/9/2010 19:02:01  | 23.676 | 10/10/2010 00:45:00 | 28.0 | 7/10/2010 16:46:01 | 24.2163 |
| 7/9/2010 19:22:01  | 23.739 | 10/10/2010 01:20:00 | 28.0 | 7/10/2010 17:06:01 | 24.2163 |
| 7/9/2010 19:42:01  | 23.739 | 10/10/2010 01:55:00 | 27.5 | 7/10/2010 17:26:01 | 24.2163 |
| 7/9/2010 20:02:01  | 23.801 | 10/10/2010 02:30:00 | 27.5 | 7/10/2010 17:46:01 | 24.2163 |
| 7/9/2010 20:22:01  | 23.801 | 10/10/2010 03:05:00 | 27.5 | 7/10/2010 18:06:01 | 24.2163 |
| 7/9/2010 20:42:01  | 23.801 | 10/10/2010 03:40:00 | 27.5 | 7/10/2010 18:26:01 | 24.2163 |
| 7/9/2010 21:02:01  | 23.864 | 10/10/2010 04:15:00 | 27.5 | 7/10/2010 18:46:01 | 24.2163 |
| 7/9/2010 21:22:01  | 23.864 | 10/10/2010 04:50:00 | 27.5 | 7/10/2010 19:06:01 | 24.2163 |
| 7/9/2010 21:42:01  | 23.864 | 10/10/2010 05:25:00 | 27.5 | 7/10/2010 19:26:01 | 24.2793 |
| 7/9/2010 22:02:01  | 23.926 | 10/10/2010 06:00:00 | 27.5 | 7/10/2010 19:46:01 | 24.2793 |
| 7/9/2010 22:22:01  | 23.926 | 10/10/2010 06:35:00 | 27.5 | 7/10/2010 20:06:01 | 24.2793 |
| 7/9/2010 22:42:01  | 23.926 | 10/10/2010 07:10:00 | 27.5 | 7/10/2010 20:26:01 | 24.2793 |
| 7/9/2010 23:02:01  | 23.926 | 10/10/2010 07:45:00 | 27.0 | 7/10/2010 20:46:01 | 24.2793 |
| 7/9/2010 23:22:01  | 23.926 | 10/10/2010 08:20:00 | 27.0 | 7/10/2010 21:06:01 | 24.2793 |
| 7/9/2010 23:42:01  | 23.926 | 10/10/2010 08:55:00 | 27.0 | 7/10/2010 21:26:01 | 24.2793 |
| 7/10/2010 00:02:01 | 23.926 | 10/10/2010 09:30:00 | 27.0 | 7/10/2010 21:46:01 | 24.3413 |
| 7/10/2010 00:22:01 | 23.926 | 10/10/2010 10:05:00 | 27.0 | 7/10/2010 22:06:01 | 24.3413 |
| 7/10/2010 00:42:01 | 23.926 | 10/10/2010 10:40:00 | 27.0 | 7/10/2010 22:26:01 | 24.3413 |
| 7/10/2010 01:02:01 | 23.989 | 10/10/2010 11:15:00 | 27.0 | 7/10/2010 22:46:01 | 24.3413 |
| 7/10/2010 01:22:01 | 23.989 | 10/10/2010 11:50:00 | 27.0 | 7/10/2010 23:06:01 | 24.3413 |
| 7/10/2010 01:42:01 | 23.926 | 10/10/2010 12:25:00 | 27.0 | 7/10/2010 23:26:01 | 24.4043 |
| 7/10/2010 02:02:01 | 23.926 | 10/10/2010 13:00:00 | 27.0 | 7/10/2010 23:46:01 | 24.4043 |
| 7/10/2010 02:22:01 | 23.926 | 10/10/2010 13:35:00 | 27.0 | 7/11/2010 00:06:01 | 24.4043 |

|                    |        |                     |      |                    |         |
|--------------------|--------|---------------------|------|--------------------|---------|
| 7/10/2010 02:42:01 | 23.926 | 10/10/2010 14:10:00 | 27.0 | 7/11/2010 00:26:01 | 24.4043 |
| 7/10/2010 03:02:01 | 23.926 | 10/10/2010 14:45:00 | 27.5 | 7/11/2010 00:46:01 | 24.4043 |
| 7/10/2010 03:22:01 | 23.926 | 10/10/2010 15:20:00 | 27.5 | 7/11/2010 01:06:01 | 24.4043 |
| 7/10/2010 03:42:01 | 23.926 | 10/10/2010 15:55:00 | 27.5 | 7/11/2010 01:26:01 | 24.4043 |
| 7/10/2010 04:02:01 | 23.926 | 10/10/2010 16:30:00 | 27.5 | 7/11/2010 01:46:01 | 24.4043 |
| 7/10/2010 04:22:01 | 23.926 | 10/10/2010 17:05:00 | 27.5 | 7/11/2010 02:06:01 | 24.4043 |
| 7/10/2010 04:42:01 | 23.926 | 10/10/2010 17:40:00 | 28.0 | 7/11/2010 02:26:01 | 24.4043 |
| 7/10/2010 05:02:01 | 23.926 | 10/10/2010 18:15:00 | 28.0 | 7/11/2010 02:46:01 | 24.4043 |
| 7/10/2010 05:22:01 | 23.926 | 10/10/2010 18:50:00 | 28.0 | 7/11/2010 03:06:01 | 24.4043 |
| 7/10/2010 05:42:01 | 23.926 | 10/10/2010 19:25:00 | 28.0 | 7/11/2010 03:26:01 | 24.4043 |
| 7/10/2010 06:02:01 | 23.864 | 10/10/2010 20:00:00 | 28.0 | 7/11/2010 03:46:01 | 24.4043 |
| 7/10/2010 06:22:01 | 23.864 | 10/10/2010 20:35:00 | 28.0 | 7/11/2010 04:06:01 | 24.4043 |
| 7/10/2010 06:42:01 | 23.864 | 10/10/2010 21:10:00 | 28.0 | 7/11/2010 04:26:01 | 24.4043 |
| 7/10/2010 07:02:01 | 23.864 | 10/10/2010 21:45:00 | 28.0 | 7/11/2010 04:46:01 | 24.4043 |
| 7/10/2010 07:22:01 | 23.864 | 10/10/2010 22:20:00 | 28.0 | 7/11/2010 05:06:01 | 24.4043 |
| 7/10/2010 07:42:01 | 23.801 | 10/10/2010 22:55:00 | 28.0 | 7/11/2010 05:26:01 | 24.4043 |
| 7/10/2010 08:02:01 | 23.801 | 10/10/2010 23:30:00 | 28.0 | 7/11/2010 05:46:01 | 24.4043 |
| 7/10/2010 08:22:01 | 23.801 | 10/11/2010 00:05:00 | 28.0 | 7/11/2010 06:06:01 | 24.4043 |
| 7/10/2010 08:42:01 | 23.801 | 10/11/2010 00:40:00 | 28.0 | 7/11/2010 06:26:01 | 24.3413 |
| 7/10/2010 09:02:01 | 23.801 | 10/11/2010 01:15:00 | 28.0 | 7/11/2010 06:46:01 | 24.3413 |
| 7/10/2010 09:22:01 | 23.739 | 10/11/2010 01:50:00 | 28.0 | 7/11/2010 07:06:01 | 24.3413 |
| 7/10/2010 09:42:01 | 23.739 | 10/11/2010 02:25:00 | 27.5 | 7/11/2010 07:26:01 | 24.3413 |
| 7/10/2010 10:02:01 | 23.739 | 10/11/2010 03:00:00 | 27.5 | 7/11/2010 07:46:01 | 24.3413 |
| 7/10/2010 10:22:01 | 23.676 | 10/11/2010 03:35:00 | 27.5 | 7/11/2010 08:06:01 | 24.3413 |
| 7/10/2010 10:42:01 | 23.676 | 10/11/2010 04:10:00 | 27.5 | 7/11/2010 08:26:01 | 24.3413 |
| 7/10/2010 11:02:01 | 23.676 | 10/11/2010 04:45:00 | 27.5 | 7/11/2010 08:46:01 | 24.2793 |
| 7/10/2010 11:22:01 | 23.676 | 10/11/2010 05:20:00 | 27.5 | 7/11/2010 09:06:01 | 24.2793 |
| 7/10/2010 11:42:01 | 23.614 | 10/11/2010 05:55:00 | 27.5 | 7/11/2010 09:26:01 | 24.2793 |
| 7/10/2010 12:02:01 | 23.614 | 10/11/2010 06:30:00 | 27.5 | 7/11/2010 09:46:01 | 24.2793 |
| 7/10/2010 12:22:01 | 23.614 | 10/11/2010 07:05:00 | 27.5 | 7/11/2010 10:06:01 | 24.2793 |
| 7/10/2010 12:42:01 | 23.614 | 10/11/2010 07:40:00 | 27.5 | 7/11/2010 10:26:01 | 24.2793 |
| 7/10/2010 13:02:01 | 23.614 | 10/11/2010 08:15:00 | 27.0 | 7/11/2010 10:46:01 | 24.2163 |
| 7/10/2010 13:22:01 | 23.614 | 10/11/2010 08:50:00 | 27.0 | 7/11/2010 11:06:01 | 24.2163 |
| 7/10/2010 13:42:01 | 23.614 | 10/11/2010 09:25:00 | 27.0 | 7/11/2010 11:26:01 | 24.2163 |
| 7/10/2010 14:02:01 | 23.614 | 10/11/2010 10:00:00 | 27.0 | 7/11/2010 11:46:01 | 24.2163 |
| 7/10/2010 14:22:01 | 23.614 | 10/11/2010 10:35:00 | 27.0 | 7/11/2010 12:06:01 | 24.2163 |
| 7/10/2010 14:42:01 | 23.614 | 10/11/2010 11:10:00 | 27.0 | 7/11/2010 12:26:01 | 24.1543 |
| 7/10/2010 15:02:01 | 23.614 | 10/11/2010 11:45:00 | 27.0 | 7/11/2010 12:46:01 | 24.1543 |
| 7/10/2010 15:22:01 | 23.614 | 10/11/2010 12:20:00 | 27.0 | 7/11/2010 13:06:01 | 24.1543 |
| 7/10/2010 15:42:01 | 23.676 | 10/11/2010 12:55:00 | 27.5 | 7/11/2010 13:26:01 | 24.1543 |
| 7/10/2010 16:02:01 | 23.676 | 10/11/2010 13:30:00 | 27.5 | 7/11/2010 13:46:01 | 24.1543 |
| 7/10/2010 16:22:01 | 23.739 | 10/11/2010 14:05:00 | 27.5 | 7/11/2010 14:06:01 | 24.1543 |
| 7/10/2010 16:42:01 | 23.739 | 10/11/2010 14:40:00 | 27.5 | 7/11/2010 14:26:01 | 24.0913 |
| 7/10/2010 17:02:01 | 23.739 | 10/11/2010 15:15:00 | 27.5 | 7/11/2010 14:46:01 | 24.0913 |
| 7/10/2010 17:22:01 | 23.801 | 10/11/2010 15:50:00 | 27.5 | 7/11/2010 15:06:01 | 24.0913 |
| 7/10/2010 17:42:01 | 23.801 | 10/11/2010 16:25:00 | 27.5 | 7/11/2010 15:26:01 | 24.0913 |
| 7/10/2010 18:02:01 | 23.864 | 10/11/2010 17:00:00 | 28.0 | 7/11/2010 15:46:01 | 24.0913 |
| 7/10/2010 18:22:01 | 23.864 | 10/11/2010 17:35:00 | 28.0 | 7/11/2010 16:06:01 | 24.0913 |
| 7/10/2010 18:42:01 | 23.864 | 10/11/2010 18:10:00 | 28.0 | 7/11/2010 16:26:01 | 24.0913 |
| 7/10/2010 19:02:01 | 23.926 | 10/11/2010 18:45:00 | 28.0 | 7/11/2010 16:46:01 | 24.0913 |

|                    |        |                     |      |                    |         |
|--------------------|--------|---------------------|------|--------------------|---------|
| 7/10/2010 19:22:01 | 23.926 | 10/11/2010 19:20:00 | 28.0 | 7/11/2010 17:06:01 | 24.0913 |
| 7/10/2010 19:42:01 | 23.989 | 10/11/2010 19:55:00 | 28.0 | 7/11/2010 17:26:01 | 24.0913 |
| 7/10/2010 20:02:01 | 23.989 | 10/11/2010 20:30:00 | 28.0 | 7/11/2010 17:46:01 | 24.0913 |
| 7/10/2010 20:22:01 | 23.989 | 10/11/2010 21:05:00 | 28.0 | 7/11/2010 18:06:01 | 24.0913 |
| 7/10/2010 20:42:01 | 23.989 | 10/11/2010 21:40:00 | 28.0 | 7/11/2010 18:26:01 | 24.0913 |
| 7/10/2010 21:02:01 | 24.051 | 10/11/2010 22:15:00 | 28.0 | 7/11/2010 18:46:01 | 24.0913 |
| 7/10/2010 21:22:01 | 24.051 | 10/11/2010 22:50:00 | 28.0 | 7/11/2010 19:06:01 | 24.0913 |
| 7/10/2010 21:42:01 | 24.051 | 10/11/2010 23:25:00 | 28.0 | 7/11/2010 19:26:01 | 24.0913 |
| 7/10/2010 22:02:01 | 24.051 | 10/12/2010 00:00:00 | 28.0 | 7/11/2010 19:46:01 | 24.1543 |
| 7/10/2010 22:22:01 | 24.051 | 10/12/2010 00:35:00 | 28.0 | 7/11/2010 20:06:01 | 24.1543 |
| 7/10/2010 22:42:01 | 24.051 | 10/12/2010 01:10:00 | 28.0 | 7/11/2010 20:26:01 | 24.1543 |
| 7/10/2010 23:02:01 | 24.051 | 10/12/2010 01:45:00 | 28.0 | 7/11/2010 20:46:01 | 24.1543 |
| 7/10/2010 23:22:01 | 24.051 | 10/12/2010 02:20:00 | 28.0 | 7/11/2010 21:06:01 | 24.1543 |
| 7/10/2010 23:42:01 | 24.051 | 10/12/2010 02:55:00 | 28.0 | 7/11/2010 21:26:01 | 24.1543 |
| 7/11/2010 00:02:01 | 24.051 | 10/12/2010 03:30:00 | 28.0 | 7/11/2010 21:46:01 | 24.2163 |
| 7/11/2010 00:22:01 | 24.051 | 10/12/2010 04:05:00 | 28.0 | 7/11/2010 22:06:01 | 24.2163 |
| 7/11/2010 00:42:01 | 24.051 | 10/12/2010 04:40:00 | 27.5 | 7/11/2010 22:26:01 | 24.2163 |
| 7/11/2010 01:02:01 | 23.989 | 10/12/2010 05:15:00 | 27.5 | 7/11/2010 22:46:01 | 24.2163 |
| 7/11/2010 01:22:01 | 23.989 | 10/12/2010 05:50:00 | 27.5 | 7/11/2010 23:06:01 | 24.2163 |
| 7/11/2010 01:42:01 | 23.989 | 10/12/2010 06:25:00 | 27.5 | 7/11/2010 23:26:01 | 24.2163 |
| 7/11/2010 02:02:01 | 23.989 | 10/12/2010 07:00:00 | 27.5 | 7/11/2010 23:46:01 | 24.2163 |
| 7/11/2010 02:22:01 | 23.926 | 10/12/2010 07:35:00 | 27.5 | 7/12/2010 00:06:01 | 24.2163 |
| 7/11/2010 02:42:01 | 23.926 | 10/12/2010 08:10:00 | 27.5 | 7/12/2010 00:26:01 | 24.2793 |
| 7/11/2010 03:02:01 | 23.926 | 10/12/2010 08:45:00 | 27.5 | 7/12/2010 00:46:01 | 24.2793 |
| 7/11/2010 03:22:01 | 23.926 | 10/12/2010 09:20:00 | 27.5 | 7/12/2010 01:06:01 | 24.2793 |
| 7/11/2010 03:42:01 | 23.864 | 10/12/2010 09:55:00 | 27.0 | 7/12/2010 01:26:01 | 24.2793 |
| 7/11/2010 04:02:01 | 23.864 | 10/12/2010 10:30:00 | 27.0 | 7/12/2010 01:46:01 | 24.2793 |
| 7/11/2010 04:22:01 | 23.864 | 10/12/2010 11:05:00 | 27.0 | 7/12/2010 02:06:01 | 24.2793 |
| 7/11/2010 04:42:01 | 23.801 | 10/12/2010 11:40:00 | 27.0 | 7/12/2010 02:26:01 | 24.2793 |
| 7/11/2010 05:02:01 | 23.801 | 10/12/2010 12:15:00 | 27.0 | 7/12/2010 02:46:01 | 24.2793 |
| 7/11/2010 05:22:01 | 23.801 | 10/12/2010 12:50:00 | 27.5 | 7/12/2010 03:06:01 | 24.2793 |
| 7/11/2010 05:42:01 | 23.739 | 10/12/2010 13:25:00 | 27.5 | 7/12/2010 03:26:01 | 24.2793 |
| 7/11/2010 06:02:01 | 23.739 | 10/12/2010 14:00:00 | 27.5 | 7/12/2010 03:46:01 | 24.2793 |
| 7/11/2010 06:22:01 | 23.676 | 10/12/2010 14:35:00 | 27.5 | 7/12/2010 04:06:01 | 24.2793 |
| 7/11/2010 06:42:01 | 23.676 | 10/12/2010 15:10:00 | 27.5 | 7/12/2010 04:26:01 | 24.2793 |
| 7/11/2010 07:02:01 | 23.676 | 10/12/2010 15:45:00 | 27.5 | 7/12/2010 04:46:01 | 24.2793 |
| 7/11/2010 07:22:01 | 23.614 | 10/12/2010 16:20:00 | 28.0 | 7/12/2010 05:06:01 | 24.2793 |
| 7/11/2010 07:42:01 | 23.614 | 10/12/2010 16:55:00 | 28.0 | 7/12/2010 05:26:01 | 24.2793 |
| 7/11/2010 08:02:01 | 23.614 | 10/12/2010 17:30:00 | 28.0 | 7/12/2010 05:46:01 | 24.2793 |
| 7/11/2010 08:22:01 | 23.551 | 10/12/2010 18:05:00 | 28.0 | 7/12/2010 06:06:01 | 24.2793 |
| 7/11/2010 08:42:01 | 23.551 | 10/12/2010 18:40:00 | 28.0 | 7/12/2010 06:26:01 | 24.2793 |
| 7/11/2010 09:02:01 | 23.489 | 10/12/2010 19:15:00 | 28.0 | 7/12/2010 06:46:01 | 24.2793 |
| 7/11/2010 09:22:01 | 23.489 | 10/12/2010 19:50:00 | 28.0 | 7/12/2010 07:06:01 | 24.2793 |
| 7/11/2010 09:42:01 | 23.489 | 10/12/2010 20:25:00 | 28.0 | 7/12/2010 07:26:01 | 24.2793 |
| 7/11/2010 10:02:01 | 23.426 | 10/12/2010 21:00:00 | 28.0 | 7/12/2010 07:46:01 | 24.2793 |
| 7/11/2010 10:22:01 | 23.426 | 10/12/2010 21:35:00 | 28.0 | 7/12/2010 08:06:01 | 24.2793 |
| 7/11/2010 10:42:01 | 23.426 | 10/12/2010 22:10:00 | 28.0 | 7/12/2010 08:26:01 | 24.2163 |
| 7/11/2010 11:02:01 | 23.364 | 10/12/2010 22:45:00 | 28.0 | 7/12/2010 08:46:01 | 24.2163 |
| 7/11/2010 11:22:01 | 23.364 | 10/12/2010 23:20:00 | 28.0 | 7/12/2010 09:06:01 | 24.2163 |
| 7/11/2010 11:42:01 | 23.364 | 10/12/2010 23:55:00 | 28.0 | 7/12/2010 09:26:01 | 24.2163 |



|                    |        |                     |      |                    |         |
|--------------------|--------|---------------------|------|--------------------|---------|
| 7/11/2010 12:02:01 | 23.364 | 10/13/2010 00:30:00 | 28.0 | 7/12/2010 09:46:01 | 24.2163 |
| 7/11/2010 12:22:01 | 23.364 | 10/13/2010 01:05:00 | 28.0 | 7/12/2010 10:06:01 | 24.2163 |
| 7/11/2010 12:42:01 | 23.301 | 10/13/2010 01:40:00 | 28.0 | 7/12/2010 10:26:01 | 24.2163 |
| 7/11/2010 13:02:01 | 23.301 | 10/13/2010 02:15:00 | 28.0 | 7/12/2010 10:46:01 | 24.2163 |
| 7/11/2010 13:22:01 | 23.301 | 10/13/2010 02:50:00 | 28.0 | 7/12/2010 11:06:01 | 24.1543 |
| 7/11/2010 13:42:01 | 23.301 | 10/13/2010 03:25:00 | 28.0 | 7/12/2010 11:26:01 | 24.1543 |
| 7/11/2010 14:02:01 | 23.301 | 10/13/2010 04:00:00 | 28.0 | 7/12/2010 11:46:01 | 24.1543 |
| 7/11/2010 14:22:01 | 23.364 | 10/13/2010 04:35:00 | 28.0 | 7/12/2010 12:06:01 | 24.1543 |
| 7/11/2010 14:42:01 | 23.364 | 10/13/2010 05:10:00 | 28.0 | 7/12/2010 12:26:01 | 24.1543 |
| 7/11/2010 15:02:01 | 23.364 | 10/13/2010 05:45:00 | 28.0 | 7/12/2010 12:46:01 | 24.0913 |
| 7/11/2010 15:22:01 | 23.364 | 10/13/2010 06:20:00 | 28.0 | 7/12/2010 13:06:01 | 24.0913 |
| 7/11/2010 15:42:01 | 23.364 | 10/13/2010 06:55:00 | 27.5 | 7/12/2010 13:26:01 | 24.0913 |
| 7/11/2010 16:02:01 | 23.426 | 10/13/2010 07:30:00 | 27.5 | 7/12/2010 13:46:01 | 24.0913 |
| 7/11/2010 16:22:01 | 23.426 | 10/13/2010 08:05:00 | 27.5 | 7/12/2010 14:06:01 | 24.0913 |
| 7/11/2010 16:42:01 | 23.489 | 10/13/2010 08:40:00 | 27.5 | 7/12/2010 14:26:01 | 24.0913 |
| 7/11/2010 17:02:01 | 23.489 | 10/13/2010 09:15:00 | 27.5 | 7/12/2010 14:46:01 | 24.0293 |
| 7/11/2010 17:22:01 | 23.551 | 10/13/2010 09:50:00 | 27.5 | 7/12/2010 15:06:01 | 24.0293 |
| 7/11/2010 17:42:01 | 23.551 | 10/13/2010 10:25:00 | 27.5 | 7/12/2010 15:26:01 | 24.0293 |
| 7/11/2010 18:02:01 | 23.614 | 10/13/2010 11:00:00 | 27.5 | 7/12/2010 15:46:01 | 24.0293 |
| 7/11/2010 18:22:01 | 23.614 | 10/13/2010 11:35:00 | 27.5 | 7/12/2010 16:06:01 | 24.0293 |
| 7/11/2010 18:42:01 | 23.676 | 10/13/2010 12:10:00 | 27.5 | 7/12/2010 16:26:01 | 24.0293 |
| 7/11/2010 19:02:01 | 23.676 | 10/13/2010 12:45:00 | 27.5 | 7/12/2010 16:46:01 | 24.0293 |
| 7/11/2010 19:22:01 | 23.676 | 10/13/2010 13:20:00 | 27.5 | 7/12/2010 17:06:01 | 24.0293 |
| 7/11/2010 19:42:01 | 23.739 | 10/13/2010 13:55:00 | 27.5 | 7/12/2010 17:26:01 | 24.0293 |
| 7/11/2010 20:02:01 | 23.739 | 10/13/2010 14:30:00 | 27.5 | 7/12/2010 17:46:01 | 24.0293 |
| 7/11/2010 20:22:01 | 23.801 | 10/13/2010 15:05:00 | 28.0 | 7/12/2010 18:06:01 | 24.0293 |
| 7/11/2010 20:42:01 | 23.801 | 10/13/2010 15:40:00 | 28.0 | 7/12/2010 18:26:01 | 24.0293 |
| 7/11/2010 21:02:01 | 23.801 | 10/13/2010 16:15:00 | 28.0 | 7/12/2010 18:46:01 | 24.0293 |
| 7/11/2010 21:22:01 | 23.801 | 10/13/2010 16:50:00 | 28.0 | 7/12/2010 19:06:01 | 24.0293 |
| 7/11/2010 21:42:01 | 23.864 | 10/13/2010 17:25:00 | 28.0 | 7/12/2010 19:26:01 | 24.0293 |
| 7/11/2010 22:02:01 | 23.864 | 10/13/2010 18:00:00 | 28.0 | 7/12/2010 19:46:01 | 24.0913 |
| 7/11/2010 22:22:01 | 23.864 | 10/13/2010 18:35:00 | 28.0 | 7/12/2010 20:06:01 | 24.0913 |
| 7/11/2010 22:42:01 | 23.864 | 10/13/2010 19:10:00 | 28.0 | 7/12/2010 20:26:01 | 24.0913 |
| 7/11/2010 23:02:01 | 23.864 | 10/13/2010 19:45:00 | 28.0 | 7/12/2010 20:46:01 | 24.0913 |
| 7/11/2010 23:22:01 | 23.864 | 10/13/2010 20:20:00 | 28.0 | 7/12/2010 21:06:01 | 24.0913 |
| 7/11/2010 23:42:01 | 23.864 | 10/13/2010 20:55:00 | 28.0 | 7/12/2010 21:26:01 | 24.0913 |
| 7/12/2010 00:02:01 | 23.864 | 10/13/2010 21:30:00 | 28.0 | 7/12/2010 21:46:01 | 24.1543 |
| 7/12/2010 00:22:01 | 23.864 | 10/13/2010 22:05:00 | 28.0 | 7/12/2010 22:06:01 | 24.1543 |
| 7/12/2010 00:42:01 | 23.864 | 10/13/2010 22:40:00 | 28.0 | 7/12/2010 22:26:01 | 24.1543 |
| 7/12/2010 01:02:01 | 23.864 | 10/13/2010 23:15:00 | 28.0 | 7/12/2010 22:46:01 | 24.1543 |
| 7/12/2010 01:22:01 | 23.864 | 10/13/2010 23:50:00 | 28.0 | 7/12/2010 23:06:01 | 24.1543 |
| 7/12/2010 01:42:01 | 23.864 | 10/14/2010 00:25:00 | 28.0 | 7/12/2010 23:26:01 | 24.1543 |
| 7/12/2010 02:02:01 | 23.801 | 10/14/2010 01:00:00 | 28.0 | 7/12/2010 23:46:01 | 24.1543 |
| 7/12/2010 02:22:01 | 23.801 | 10/14/2010 01:35:00 | 28.0 | 7/13/2010 00:06:01 | 24.1543 |
| 7/12/2010 02:42:01 | 23.801 | 10/14/2010 02:10:00 | 28.0 | 7/13/2010 00:26:01 | 24.1543 |
| 7/12/2010 03:02:01 | 23.801 | 10/14/2010 02:45:00 | 28.0 | 7/13/2010 00:46:01 | 24.2163 |
| 7/12/2010 03:22:01 | 23.801 | 10/14/2010 03:20:00 | 28.0 | 7/13/2010 01:06:01 | 24.2163 |
| 7/12/2010 03:42:01 | 23.801 | 10/14/2010 03:55:00 | 28.0 | 7/13/2010 01:26:01 | 24.2163 |
| 7/12/2010 04:02:01 | 23.739 | 10/14/2010 04:30:00 | 28.0 | 7/13/2010 01:46:01 | 24.2163 |
| 7/12/2010 04:22:01 | 23.739 | 10/14/2010 05:05:00 | 27.5 | 7/13/2010 02:06:01 | 24.2163 |

|                    |        |                     |      |                    |         |
|--------------------|--------|---------------------|------|--------------------|---------|
| 7/12/2010 04:42:01 | 23.739 | 10/14/2010 05:40:00 | 27.5 | 7/13/2010 02:26:01 | 24.2163 |
| 7/12/2010 05:02:01 | 23.739 | 10/14/2010 06:15:00 | 27.5 | 7/13/2010 02:46:01 | 24.2163 |
| 7/12/2010 05:22:01 | 23.676 | 10/14/2010 06:50:00 | 27.5 | 7/13/2010 03:06:01 | 24.2163 |
| 7/12/2010 05:42:01 | 23.676 | 10/14/2010 07:25:00 | 27.5 | 7/13/2010 03:26:01 | 24.2163 |
| 7/12/2010 06:02:01 | 23.676 | 10/14/2010 08:00:00 | 27.5 | 7/13/2010 03:46:01 | 24.2163 |
| 7/12/2010 06:22:01 | 23.614 | 10/14/2010 08:35:00 | 27.5 | 7/13/2010 04:06:01 | 24.2163 |
| 7/12/2010 06:42:01 | 23.614 | 10/14/2010 09:10:00 | 27.0 | 7/13/2010 04:26:01 | 24.2163 |
| 7/12/2010 07:02:01 | 23.614 | 10/14/2010 09:45:00 | 27.0 | 7/13/2010 04:46:01 | 24.2163 |
| 7/12/2010 07:22:01 | 23.614 | 10/14/2010 10:20:00 | 27.0 | 7/13/2010 05:06:01 | 24.2163 |
| 7/12/2010 07:42:01 | 23.551 | 10/14/2010 10:55:00 | 27.0 | 7/13/2010 05:26:01 | 24.2163 |
| 7/12/2010 08:02:01 | 23.551 | 10/14/2010 11:30:00 | 27.0 | 7/13/2010 05:46:01 | 24.2163 |
| 7/12/2010 08:22:01 | 23.489 | 10/14/2010 12:05:00 | 27.0 | 7/13/2010 06:06:01 | 24.1543 |
| 7/12/2010 08:42:01 | 23.489 | 10/14/2010 12:40:00 | 27.0 | 7/13/2010 06:26:01 | 24.1543 |
| 7/12/2010 09:02:01 | 23.489 | 10/14/2010 13:15:00 | 27.5 | 7/13/2010 06:46:01 | 24.1543 |
| 7/12/2010 09:22:01 | 23.426 | 10/14/2010 13:50:00 | 27.5 | 7/13/2010 07:06:01 | 24.1543 |
| 7/12/2010 09:42:01 | 23.426 | 10/14/2010 14:25:00 | 27.5 | 7/13/2010 07:26:01 | 24.1543 |
| 7/12/2010 10:02:01 | 23.426 | 10/14/2010 15:00:00 | 27.5 | 7/13/2010 07:46:01 | 24.1543 |
| 7/12/2010 10:22:01 | 23.364 | 10/14/2010 15:35:00 | 27.5 | 7/13/2010 08:06:01 | 24.1543 |
| 7/12/2010 10:42:01 | 23.364 | 10/14/2010 16:10:00 | 27.5 | 7/13/2010 08:26:01 | 24.1543 |
| 7/12/2010 11:02:01 | 23.364 | 10/14/2010 16:45:00 | 28.0 | 7/13/2010 08:46:01 | 24.0913 |
| 7/12/2010 11:22:01 | 23.301 | 10/14/2010 17:20:00 | 28.0 | 7/13/2010 09:06:01 | 24.0913 |
| 7/12/2010 11:42:01 | 23.301 | 10/14/2010 17:55:00 | 28.0 | 7/13/2010 09:26:01 | 24.0913 |
| 7/12/2010 12:02:01 | 23.301 | 10/14/2010 18:30:00 | 28.0 | 7/13/2010 09:46:01 | 24.0913 |
| 7/12/2010 12:22:01 | 23.301 | 10/14/2010 19:05:00 | 28.0 | 7/13/2010 10:06:01 | 24.0913 |
| 7/12/2010 12:42:01 | 23.301 | 10/14/2010 19:40:00 | 28.0 | 7/13/2010 10:26:01 | 24.0913 |
| 7/12/2010 13:02:01 | 23.239 | 10/14/2010 20:15:00 | 28.0 | 7/13/2010 10:46:01 | 24.0293 |
| 7/12/2010 13:22:01 | 23.239 | 10/14/2010 20:50:00 | 28.0 | 7/13/2010 11:06:01 | 24.0293 |
| 7/12/2010 13:42:01 | 23.239 | 10/14/2010 21:25:00 | 28.0 | 7/13/2010 11:26:01 | 24.0293 |
| 7/12/2010 14:02:01 | 23.239 | 10/14/2010 22:00:00 | 28.0 | 7/13/2010 11:46:01 | 24.0293 |
| 7/12/2010 14:22:01 | 23.239 | 10/14/2010 22:35:00 | 28.0 | 7/13/2010 12:06:01 | 24.0293 |
| 7/12/2010 14:42:01 | 23.239 | 10/14/2010 23:10:00 | 28.0 | 7/13/2010 12:26:01 | 24.0293 |
| 7/12/2010 15:02:01 | 23.301 | 10/14/2010 23:45:00 | 28.0 | 7/13/2010 12:46:01 | 24.0293 |
| 7/12/2010 15:22:01 | 23.301 | 10/15/2010 00:20:00 | 28.0 | 7/13/2010 13:06:01 | 23.9663 |
| 7/12/2010 15:42:01 | 23.301 | 10/15/2010 00:55:00 | 28.0 | 7/13/2010 13:26:01 | 23.9663 |
| 7/12/2010 16:02:01 | 23.364 | 10/15/2010 01:30:00 | 28.0 | 7/13/2010 13:46:01 | 23.9663 |
| 7/12/2010 16:22:01 | 23.364 | 10/15/2010 02:05:00 | 28.0 | 7/13/2010 14:06:01 | 23.9663 |
| 7/12/2010 16:42:01 | 23.364 | 10/15/2010 02:40:00 | 28.0 | 7/13/2010 14:26:01 | 23.9663 |
| 7/12/2010 17:02:01 | 23.426 | 10/15/2010 03:15:00 | 28.0 | 7/13/2010 14:46:01 | 23.9663 |
| 7/12/2010 17:22:01 | 23.426 | 10/15/2010 03:50:00 | 28.0 | 7/13/2010 15:06:01 | 23.9663 |
| 7/12/2010 17:42:01 | 23.489 | 10/15/2010 04:25:00 | 27.5 | 7/13/2010 15:26:01 | 23.9663 |
| 7/12/2010 18:02:01 | 23.489 | 10/15/2010 05:00:00 | 27.5 | 7/13/2010 15:46:01 | 23.9663 |
| 7/12/2010 18:22:01 | 23.551 | 10/15/2010 05:35:00 | 27.5 | 7/13/2010 16:06:01 | 23.9663 |
| 7/12/2010 18:42:01 | 23.551 | 10/15/2010 06:10:00 | 27.5 | 7/13/2010 16:26:01 | 23.9663 |
| 7/12/2010 19:02:01 | 23.551 | 10/15/2010 06:45:00 | 27.5 | 7/13/2010 16:46:01 | 23.9663 |
| 7/12/2010 19:22:01 | 23.614 | 10/15/2010 07:20:00 | 27.5 | 7/13/2010 17:06:01 | 23.9663 |
| 7/12/2010 19:42:01 | 23.614 | 10/15/2010 07:55:00 | 27.5 | 7/13/2010 17:26:01 | 23.9663 |
| 7/12/2010 20:02:01 | 23.676 | 10/15/2010 08:30:00 | 27.5 | 7/13/2010 17:46:01 | 23.9663 |
| 7/12/2010 20:22:01 | 23.676 | 10/15/2010 09:05:00 | 27.0 | 7/13/2010 18:06:01 | 23.9663 |
| 7/12/2010 20:42:01 | 23.676 | 10/15/2010 09:40:00 | 27.0 | 7/13/2010 18:26:01 | 23.9663 |
| 7/12/2010 21:02:01 | 23.739 | 10/15/2010 10:15:00 | 27.0 | 7/13/2010 18:46:01 | 23.9663 |

|                    |        |                     |      |                    |         |
|--------------------|--------|---------------------|------|--------------------|---------|
| 7/12/2010 21:22:01 | 23.739 | 10/15/2010 10:50:00 | 27.0 | 7/13/2010 19:06:01 | 23.9663 |
| 7/12/2010 21:42:01 | 23.739 | 10/15/2010 11:25:00 | 27.0 | 7/13/2010 19:26:01 | 23.9663 |
| 7/12/2010 22:02:01 | 23.739 | 10/15/2010 12:00:00 | 27.0 | 7/13/2010 19:46:01 | 24.0293 |
| 7/12/2010 22:22:01 | 23.739 | 10/15/2010 12:35:00 | 27.0 | 7/13/2010 20:06:01 | 24.0293 |
| 7/12/2010 22:42:01 | 23.739 | 10/15/2010 13:10:00 | 27.5 | 7/13/2010 20:26:01 | 24.0293 |
| 7/12/2010 23:02:01 | 23.739 | 10/15/2010 13:45:00 | 27.5 | 7/13/2010 20:46:01 | 24.0293 |
| 7/12/2010 23:22:01 | 23.739 | 10/15/2010 14:20:00 | 27.5 | 7/13/2010 21:06:01 | 24.0293 |
| 7/12/2010 23:42:01 | 23.739 | 10/15/2010 14:55:00 | 27.5 | 7/13/2010 21:26:01 | 24.0293 |
| 7/13/2010 00:02:01 | 23.739 | 10/15/2010 15:30:00 | 27.5 | 7/13/2010 21:46:01 | 24.0913 |
| 7/13/2010 00:22:01 | 23.739 | 10/15/2010 16:05:00 | 27.5 | 7/13/2010 22:06:01 | 24.0913 |
| 7/13/2010 00:42:01 | 23.739 | 10/15/2010 16:40:00 | 27.5 | 7/13/2010 22:26:01 | 24.0913 |
| 7/13/2010 01:02:01 | 23.739 | 10/15/2010 17:15:00 | 27.5 | 7/13/2010 22:46:01 | 24.0913 |
| 7/13/2010 01:22:01 | 23.739 | 10/15/2010 17:50:00 | 28.0 | 7/13/2010 23:06:01 | 24.0913 |
| 7/13/2010 01:42:01 | 23.676 | 10/15/2010 18:25:00 | 28.0 | 7/13/2010 23:26:01 | 24.1543 |
| 7/13/2010 02:02:01 | 23.676 | 10/15/2010 19:00:00 | 28.0 | 7/13/2010 23:46:01 | 24.1543 |
| 7/13/2010 02:22:01 | 23.676 | 10/15/2010 19:35:00 | 28.0 | 7/14/2010 00:06:01 | 24.1543 |
| 7/13/2010 02:42:01 | 23.676 | 10/15/2010 20:10:00 | 28.0 | 7/14/2010 00:26:01 | 24.1543 |
| 7/13/2010 03:02:01 | 23.676 | 10/15/2010 20:45:00 | 28.0 | 7/14/2010 00:46:01 | 24.1543 |
| 7/13/2010 03:22:01 | 23.614 | 10/15/2010 21:20:00 | 28.0 | 7/14/2010 01:06:01 | 24.1543 |
| 7/13/2010 03:42:01 | 23.614 | 10/15/2010 21:55:00 | 28.0 | 7/14/2010 01:26:01 | 24.1543 |
| 7/13/2010 04:02:01 | 23.614 | 10/15/2010 22:30:00 | 28.0 | 7/14/2010 01:46:01 | 24.1543 |
| 7/13/2010 04:22:01 | 23.551 | 10/15/2010 23:05:00 | 28.0 | 7/14/2010 02:06:01 | 24.1543 |
| 7/13/2010 04:42:01 | 23.551 | 10/15/2010 23:40:00 | 28.0 | 7/14/2010 02:26:01 | 24.2163 |
| 7/13/2010 05:02:01 | 23.551 | 10/16/2010 00:15:00 | 28.0 | 7/14/2010 02:46:01 | 24.2163 |
| 7/13/2010 05:22:01 | 23.551 | 10/16/2010 00:50:00 | 28.0 | 7/14/2010 03:06:01 | 24.2163 |
| 7/13/2010 05:42:01 | 23.489 | 10/16/2010 01:25:00 | 28.0 | 7/14/2010 03:26:01 | 24.2163 |
| 7/13/2010 06:02:01 | 23.489 | 10/16/2010 02:00:00 | 28.0 | 7/14/2010 03:46:01 | 24.2163 |
| 7/13/2010 06:22:01 | 23.426 | 10/16/2010 02:35:00 | 28.0 | 7/14/2010 04:06:01 | 24.2163 |
| 7/13/2010 06:42:01 | 23.426 | 10/16/2010 03:10:00 | 28.0 | 7/14/2010 04:26:01 | 24.2163 |
| 7/13/2010 07:02:01 | 23.426 | 10/16/2010 03:45:00 | 27.5 | 7/14/2010 04:46:01 | 24.2163 |
| 7/13/2010 07:22:01 | 23.364 | 10/16/2010 04:20:00 | 27.5 | 7/14/2010 05:06:01 | 24.2163 |
| 7/13/2010 07:42:01 | 23.364 | 10/16/2010 04:55:00 | 27.5 | 7/14/2010 05:26:01 | 24.2163 |
| 7/13/2010 08:02:01 | 23.364 | 10/16/2010 05:30:00 | 27.5 | 7/14/2010 05:46:01 | 24.2163 |
| 7/13/2010 08:22:01 | 23.301 | 10/16/2010 06:05:00 | 27.5 | 7/14/2010 06:06:01 | 24.2163 |
| 7/13/2010 08:42:01 | 23.301 | 10/16/2010 06:40:00 | 27.5 | 7/14/2010 06:26:01 | 24.2163 |
| 7/13/2010 09:02:01 | 23.301 | 10/16/2010 07:15:00 | 27.5 | 7/14/2010 06:46:01 | 24.2163 |
| 7/13/2010 09:22:01 | 23.239 | 10/16/2010 07:50:00 | 27.5 | 7/14/2010 07:06:01 | 24.2163 |
| 7/13/2010 09:42:01 | 23.239 | 10/16/2010 08:25:00 | 27.5 | 7/14/2010 07:26:01 | 24.2163 |
| 7/13/2010 10:02:01 | 23.239 | 10/16/2010 09:00:00 | 27.5 | 7/14/2010 07:46:01 | 24.2163 |
| 7/13/2010 10:22:01 | 23.176 | 10/16/2010 09:35:00 | 27.5 | 7/14/2010 08:06:01 | 24.2163 |
| 7/13/2010 10:42:01 | 23.176 | 10/16/2010 10:10:00 | 27.5 | 7/14/2010 08:26:01 | 24.1543 |
| 7/13/2010 11:02:01 | 23.176 | 10/16/2010 10:45:00 | 27.5 | 7/14/2010 08:46:01 | 24.1543 |
| 7/13/2010 11:22:01 | 23.176 | 10/16/2010 11:20:00 | 27.5 | 7/14/2010 09:06:01 | 24.1543 |
| 7/13/2010 11:42:01 | 23.114 | 10/16/2010 11:55:00 | 27.5 | 7/14/2010 09:26:01 | 24.1543 |
| 7/13/2010 12:02:01 | 23.114 | 10/16/2010 12:30:00 | 27.5 | 7/14/2010 09:46:01 | 24.1543 |
| 7/13/2010 12:22:01 | 23.114 | 10/16/2010 13:05:00 | 27.5 | 7/14/2010 10:06:01 | 24.1543 |
| 7/13/2010 12:42:01 | 23.114 | 10/16/2010 13:40:00 | 27.5 | 7/14/2010 10:26:01 | 24.1543 |
| 7/13/2010 13:02:01 | 23.114 | 10/16/2010 14:15:00 | 27.5 | 7/14/2010 10:46:01 | 24.1543 |
| 7/13/2010 13:22:01 | 23.114 | 10/16/2010 14:50:00 | 27.5 | 7/14/2010 11:06:01 | 24.1543 |
| 7/13/2010 13:42:01 | 23.114 | 10/16/2010 15:25:00 | 27.5 | 7/14/2010 11:26:01 | 24.1543 |

|                    |        |                     |      |                    |         |
|--------------------|--------|---------------------|------|--------------------|---------|
| 7/13/2010 14:02:01 | 23.114 | 10/16/2010 16:00:00 | 28.0 | 7/14/2010 11:46:01 | 24.1543 |
| 7/13/2010 14:22:01 | 23.114 | 10/16/2010 16:35:00 | 28.0 | 7/14/2010 12:06:01 | 24.1543 |
| 7/13/2010 14:42:01 | 23.114 | 10/16/2010 17:10:00 | 28.0 | 7/14/2010 12:26:01 | 24.1543 |
| 7/13/2010 15:02:01 | 23.176 | 10/16/2010 17:45:00 | 28.0 | 7/14/2010 12:46:01 | 24.1543 |
| 7/13/2010 15:22:01 | 23.176 | 10/16/2010 18:20:00 | 28.0 | 7/14/2010 13:06:01 | 24.0913 |
| 7/13/2010 15:42:01 | 23.176 | 10/16/2010 18:55:00 | 28.0 | 7/14/2010 13:26:01 | 24.0913 |
| 7/13/2010 16:02:01 | 23.239 | 10/16/2010 19:30:00 | 28.0 | 7/14/2010 13:46:01 | 24.0913 |
| 7/13/2010 16:22:01 | 23.239 | 10/16/2010 20:05:00 | 28.0 | 7/14/2010 14:06:01 | 24.0913 |
| 7/13/2010 16:42:01 | 23.301 | 10/16/2010 20:40:00 | 28.0 | 7/14/2010 14:26:01 | 24.0913 |
| 7/13/2010 17:02:01 | 23.301 | 10/16/2010 21:15:00 | 28.0 | 7/14/2010 14:46:01 | 24.0913 |
| 7/13/2010 17:22:01 | 23.364 | 10/16/2010 21:50:00 | 28.0 | 7/14/2010 15:06:01 | 24.0913 |
| 7/13/2010 17:42:01 | 23.364 | 10/16/2010 22:25:00 | 28.0 | 7/14/2010 15:26:01 | 24.0913 |
| 7/13/2010 18:02:01 | 23.426 | 10/16/2010 23:00:00 | 28.0 | 7/14/2010 15:46:01 | 24.0913 |
| 7/13/2010 18:22:01 | 23.426 | 10/16/2010 23:35:00 | 28.0 | 7/14/2010 16:06:01 | 24.0913 |
| 7/13/2010 18:42:01 | 23.489 | 10/17/2010 00:10:00 | 28.0 | 7/14/2010 16:26:01 | 24.0913 |
| 7/13/2010 19:02:01 | 23.489 | 10/17/2010 00:45:00 | 28.0 | 7/14/2010 16:46:01 | 24.0913 |
| 7/13/2010 19:22:01 | 23.551 | 10/17/2010 01:20:00 | 28.0 | 7/14/2010 17:06:01 | 24.0913 |
| 7/13/2010 19:42:01 | 23.551 | 10/17/2010 01:55:00 | 28.0 | 7/14/2010 17:26:01 | 24.1543 |
| 7/13/2010 20:02:01 | 23.551 | 10/17/2010 02:30:00 | 28.0 | 7/14/2010 17:46:01 | 24.1543 |
| 7/13/2010 20:22:01 | 23.614 | 10/17/2010 03:05:00 | 28.0 | 7/14/2010 18:06:01 | 24.1543 |
| 7/13/2010 20:42:01 | 23.614 | 10/17/2010 03:40:00 | 28.0 | 7/14/2010 18:26:01 | 24.1543 |
| 7/13/2010 21:02:01 | 23.614 | 10/17/2010 04:15:00 | 28.0 | 7/14/2010 18:46:01 | 24.1543 |
| 7/13/2010 21:22:01 | 23.676 | 10/17/2010 04:50:00 | 28.0 | 7/14/2010 19:06:01 | 24.1543 |
| 7/13/2010 21:42:01 | 23.676 | 10/17/2010 05:25:00 | 28.0 | 7/14/2010 19:26:01 | 24.1543 |
| 7/13/2010 22:02:01 | 23.676 | 10/17/2010 06:00:00 | 27.5 | 7/14/2010 19:46:01 | 24.1543 |
| 7/13/2010 22:22:01 | 23.676 | 10/17/2010 06:35:00 | 27.5 | 7/14/2010 20:06:01 | 24.2163 |
| 7/13/2010 22:42:01 | 23.676 | 10/17/2010 07:10:00 | 27.5 | 7/14/2010 20:26:01 | 24.2163 |
| 7/13/2010 23:02:01 | 23.739 | 10/17/2010 07:45:00 | 27.5 | 7/14/2010 20:46:01 | 24.2163 |
| 7/13/2010 23:22:01 | 23.739 | 10/17/2010 08:20:00 | 27.5 | 7/14/2010 21:06:01 | 24.2163 |
| 7/13/2010 23:42:01 | 23.739 | 10/17/2010 08:55:00 | 27.5 | 7/14/2010 21:26:01 | 24.2163 |
| 7/14/2010 00:02:01 | 23.739 | 10/17/2010 09:30:00 | 27.5 | 7/14/2010 21:46:01 | 24.2163 |
| 7/14/2010 00:22:01 | 23.739 | 10/17/2010 10:05:00 | 27.5 | 7/14/2010 22:06:01 | 24.2793 |
| 7/14/2010 00:42:01 | 23.676 | 10/17/2010 10:40:00 | 27.5 | 7/14/2010 22:26:01 | 24.2793 |
| 7/14/2010 01:02:01 | 23.676 | 10/17/2010 11:15:00 | 27.5 | 7/14/2010 22:46:01 | 24.2793 |
| 7/14/2010 01:22:01 | 23.676 | 10/17/2010 11:50:00 | 27.5 | 7/14/2010 23:06:01 | 24.2793 |
| 7/14/2010 01:42:01 | 23.676 | 10/17/2010 12:25:00 | 27.5 | 7/14/2010 23:26:01 | 24.2793 |
| 7/14/2010 02:02:01 | 23.676 | 10/17/2010 13:00:00 | 27.5 | 7/14/2010 23:46:01 | 24.2793 |
| 7/14/2010 02:22:01 | 23.676 | 10/17/2010 13:35:00 | 27.5 | 7/15/2010 00:06:01 | 24.3413 |
| 7/14/2010 02:42:01 | 23.676 | 10/17/2010 14:10:00 | 27.5 | 7/15/2010 00:26:01 | 24.3413 |
| 7/14/2010 03:02:01 | 23.676 | 10/17/2010 14:45:00 | 27.5 | 7/15/2010 00:46:01 | 24.3413 |
| 7/14/2010 03:22:01 | 23.676 | 10/17/2010 15:20:00 | 28.0 | 7/15/2010 01:06:01 | 24.3413 |
| 7/14/2010 03:42:01 | 23.614 | 10/17/2010 15:55:00 | 28.0 | 7/15/2010 01:26:01 | 24.3413 |
| 7/14/2010 04:02:01 | 23.614 | 10/17/2010 16:30:00 | 28.0 | 7/15/2010 01:46:01 | 24.3413 |
| 7/14/2010 04:22:01 | 23.614 | 10/17/2010 17:05:00 | 28.0 | 7/15/2010 02:06:01 | 24.3413 |
| 7/14/2010 04:42:01 | 23.614 | 10/17/2010 17:40:00 | 28.0 | 7/15/2010 02:26:01 | 24.3413 |
| 7/14/2010 05:02:01 | 23.614 | 10/17/2010 18:15:00 | 28.0 | 7/15/2010 02:46:01 | 24.3413 |
| 7/14/2010 05:22:01 | 23.614 | 10/17/2010 18:50:00 | 28.0 | 7/15/2010 03:06:01 | 24.3413 |
| 7/14/2010 05:42:01 | 23.614 | 10/17/2010 19:25:00 | 28.0 | 7/15/2010 03:26:01 | 24.3413 |
| 7/14/2010 06:02:01 | 23.551 | 10/17/2010 20:00:00 | 28.5 | 7/15/2010 03:46:01 | 24.3413 |
| 7/14/2010 06:22:01 | 23.551 | 10/17/2010 20:35:00 | 28.5 | 7/15/2010 04:06:01 | 24.3413 |

|                    |        |                     |      |                    |         |
|--------------------|--------|---------------------|------|--------------------|---------|
| 7/14/2010 06:42:01 | 23.551 | 10/17/2010 21:10:00 | 28.5 | 7/15/2010 04:26:01 | 24.3413 |
| 7/14/2010 07:02:01 | 23.551 | 10/17/2010 21:45:00 | 28.5 | 7/15/2010 04:46:01 | 24.3413 |
| 7/14/2010 07:22:01 | 23.551 | 10/17/2010 22:20:00 | 28.5 | 7/15/2010 05:06:01 | 24.3413 |
| 7/14/2010 07:42:01 | 23.551 | 10/17/2010 22:55:00 | 28.5 | 7/15/2010 05:26:01 | 24.3413 |
| 7/14/2010 08:02:01 | 23.489 | 10/17/2010 23:30:00 | 28.5 | 7/15/2010 05:46:01 | 24.3413 |
| 7/14/2010 08:22:01 | 23.489 | 10/18/2010 00:05:00 | 28.5 | 7/15/2010 06:06:01 | 24.3413 |
| 7/14/2010 08:42:01 | 23.489 | 10/18/2010 00:40:00 | 28.5 | 7/15/2010 06:26:01 | 24.3413 |
| 7/14/2010 09:02:01 | 23.489 | 10/18/2010 01:15:00 | 28.0 | 7/15/2010 06:46:01 | 24.3413 |
| 7/14/2010 09:22:01 | 23.489 | 10/18/2010 01:50:00 | 28.0 | 7/15/2010 07:06:01 | 24.3413 |
| 7/14/2010 09:42:01 | 23.489 | 10/18/2010 02:25:00 | 28.0 | 7/15/2010 07:26:01 | 24.2793 |
| 7/14/2010 10:02:01 | 23.426 | 10/18/2010 03:00:00 | 28.0 | 7/15/2010 07:46:01 | 24.2793 |
| 7/14/2010 10:22:01 | 23.426 | 10/18/2010 03:35:00 | 28.0 | 7/15/2010 08:06:01 | 24.2793 |
| 7/14/2010 10:42:01 | 23.426 | 10/18/2010 04:10:00 | 28.0 | 7/15/2010 08:26:01 | 24.2793 |
| 7/14/2010 11:02:01 | 23.426 | 10/18/2010 04:45:00 | 28.0 | 7/15/2010 08:46:01 | 24.2793 |
| 7/14/2010 11:22:01 | 23.426 | 10/18/2010 05:20:00 | 28.0 | 7/15/2010 09:06:01 | 24.2793 |
| 7/14/2010 11:42:01 | 23.426 | 10/18/2010 05:55:00 | 28.0 | 7/15/2010 09:26:01 | 24.2163 |
| 7/14/2010 12:02:01 | 23.364 | 10/18/2010 06:30:00 | 28.0 | 7/15/2010 09:46:01 | 24.2163 |
| 7/14/2010 12:22:01 | 23.364 | 10/18/2010 07:05:00 | 27.5 | 7/15/2010 10:06:01 | 24.2163 |
| 7/14/2010 12:42:01 | 23.364 | 10/18/2010 07:40:00 | 27.5 | 7/15/2010 10:26:01 | 24.2163 |
| 7/14/2010 13:02:01 | 23.364 | 10/18/2010 08:15:00 | 27.5 | 7/15/2010 10:46:01 | 24.2163 |
| 7/14/2010 13:22:01 | 23.364 | 10/18/2010 08:50:00 | 27.5 | 7/15/2010 11:06:01 | 24.2163 |
| 7/14/2010 13:42:01 | 23.364 | 10/18/2010 09:25:00 | 27.5 | 7/15/2010 11:26:01 | 24.1543 |
| 7/14/2010 14:02:01 | 23.426 | 10/18/2010 10:00:00 | 27.5 | 7/15/2010 11:46:01 | 24.1543 |
| 7/14/2010 14:22:01 | 23.426 | 10/18/2010 10:35:00 | 27.5 | 7/15/2010 12:06:01 | 24.1543 |
| 7/14/2010 14:42:01 | 23.426 | 10/18/2010 11:10:00 | 27.5 | 7/15/2010 12:26:01 | 24.1543 |
| 7/14/2010 15:02:01 | 23.426 | 10/18/2010 11:45:00 | 27.5 | 7/15/2010 12:46:01 | 24.0913 |
| 7/14/2010 15:22:01 | 23.489 | 10/18/2010 12:20:00 | 27.5 | 7/15/2010 13:06:01 | 24.0913 |
| 7/14/2010 15:42:01 | 23.489 | 10/18/2010 12:55:00 | 27.5 | 7/15/2010 13:26:01 | 24.0913 |
| 7/14/2010 16:02:01 | 23.551 | 10/18/2010 13:30:00 | 27.5 | 7/15/2010 13:46:01 | 24.0913 |
| 7/14/2010 16:22:01 | 23.551 | 10/18/2010 14:05:00 | 27.5 | 7/15/2010 14:06:01 | 24.0913 |
| 7/14/2010 16:42:01 | 23.551 | 10/18/2010 14:40:00 | 28.0 | 7/15/2010 14:26:01 | 24.0293 |
| 7/14/2010 17:02:01 | 23.614 | 10/18/2010 15:15:00 | 28.0 | 7/15/2010 14:46:01 | 24.0293 |
| 7/14/2010 17:22:01 | 23.614 | 10/18/2010 15:50:00 | 28.0 | 7/15/2010 15:06:01 | 24.0293 |
| 7/14/2010 17:42:01 | 23.676 | 10/18/2010 16:25:00 | 28.0 | 7/15/2010 15:26:01 | 24.0293 |
| 7/14/2010 18:02:01 | 23.676 | 10/18/2010 17:00:00 | 28.0 | 7/15/2010 15:46:01 | 24.0293 |
| 7/14/2010 18:22:01 | 23.739 | 10/18/2010 17:35:00 | 28.0 | 7/15/2010 16:06:01 | 24.0293 |
| 7/14/2010 18:42:01 | 23.739 | 10/18/2010 18:10:00 | 28.0 | 7/15/2010 16:26:01 | 24.0293 |
| 7/14/2010 19:02:01 | 23.739 | 10/18/2010 18:45:00 | 28.0 | 7/15/2010 16:46:01 | 24.0293 |
| 7/14/2010 19:22:01 | 23.801 | 10/18/2010 19:20:00 | 28.0 | 7/15/2010 17:06:01 | 24.0293 |
| 7/14/2010 19:42:01 | 23.801 | 10/18/2010 19:55:00 | 28.5 | 7/15/2010 17:26:01 | 24.0293 |
| 7/14/2010 20:02:01 | 23.864 | 10/18/2010 20:30:00 | 28.5 | 7/15/2010 17:46:01 | 24.0293 |
| 7/14/2010 20:22:01 | 23.864 | 10/18/2010 21:05:00 | 28.5 | 7/15/2010 18:06:01 | 24.0293 |
| 7/14/2010 20:42:01 | 23.864 | 10/18/2010 21:40:00 | 28.5 | 7/15/2010 18:26:01 | 24.0293 |
| 7/14/2010 21:02:01 | 23.864 | 10/18/2010 22:15:00 | 28.5 | 7/15/2010 18:46:01 | 24.0293 |
| 7/14/2010 21:22:01 | 23.926 | 10/18/2010 22:50:00 | 28.5 | 7/15/2010 19:06:01 | 24.0293 |
| 7/14/2010 21:42:01 | 23.926 | 10/18/2010 23:25:00 | 28.5 | 7/15/2010 19:26:01 | 24.0293 |
| 7/14/2010 22:02:01 | 23.926 | 10/19/2010 00:00:00 | 28.0 | 7/15/2010 19:46:01 | 24.0293 |
| 7/14/2010 22:22:01 | 23.926 | 10/19/2010 00:35:00 | 28.0 | 7/15/2010 20:06:01 | 24.0293 |
| 7/14/2010 22:42:01 | 23.926 | 10/19/2010 01:10:00 | 28.0 | 7/15/2010 20:26:01 | 24.0293 |
| 7/14/2010 23:02:01 | 23.926 | 10/19/2010 01:45:00 | 28.0 | 7/15/2010 20:46:01 | 24.0293 |

|                    |        |                     |      |                    |         |
|--------------------|--------|---------------------|------|--------------------|---------|
| 7/14/2010 23:22:01 | 23.926 | 10/19/2010 02:20:00 | 28.0 | 7/15/2010 21:06:01 | 24.0913 |
| 7/14/2010 23:42:01 | 23.926 | 10/19/2010 02:55:00 | 28.0 | 7/15/2010 21:26:01 | 24.0913 |
| 7/15/2010 00:02:01 | 23.926 | 10/19/2010 03:30:00 | 28.0 | 7/15/2010 21:46:01 | 24.0913 |
| 7/15/2010 00:22:01 | 23.926 | 10/19/2010 04:05:00 | 28.0 | 7/15/2010 22:06:01 | 24.0913 |
| 7/15/2010 00:42:01 | 23.926 | 10/19/2010 04:40:00 | 28.0 | 7/15/2010 22:26:01 | 24.0913 |
| 7/15/2010 01:02:01 | 23.926 | 10/19/2010 05:15:00 | 28.0 | 7/15/2010 22:46:01 | 24.0913 |
| 7/15/2010 01:22:01 | 23.926 | 10/19/2010 05:50:00 | 28.0 | 7/15/2010 23:06:01 | 24.1543 |
| 7/15/2010 01:42:01 | 23.926 | 10/19/2010 06:25:00 | 28.0 | 7/15/2010 23:26:01 | 24.1543 |
| 7/15/2010 02:02:01 | 23.864 | 10/19/2010 07:00:00 | 28.0 | 7/15/2010 23:46:01 | 24.1543 |
| 7/15/2010 02:22:01 | 23.864 | 10/19/2010 07:35:00 | 28.0 | 7/16/2010 00:06:01 | 24.1543 |
| 7/15/2010 02:42:01 | 23.864 | 10/19/2010 08:10:00 | 28.0 | 7/16/2010 00:26:01 | 24.1543 |
| 7/15/2010 03:02:01 | 23.864 | 10/19/2010 08:45:00 | 28.0 | 7/16/2010 00:46:01 | 24.1543 |
| 7/15/2010 03:22:01 | 23.801 | 10/19/2010 09:20:00 | 28.0 | 7/16/2010 01:06:01 | 24.1543 |
| 7/15/2010 03:42:01 | 23.801 | 10/19/2010 09:55:00 | 27.5 | 7/16/2010 01:26:01 | 24.1543 |
| 7/15/2010 04:02:01 | 23.801 | 10/19/2010 10:30:00 | 27.5 | 7/16/2010 01:46:01 | 24.1543 |
| 7/15/2010 04:22:01 | 23.739 | 10/19/2010 11:05:00 | 27.5 | 7/16/2010 02:06:01 | 24.1543 |
| 7/15/2010 04:42:01 | 23.739 | 10/19/2010 11:40:00 | 28.0 | 7/16/2010 02:26:01 | 24.1543 |
| 7/15/2010 05:02:01 | 23.739 | 10/19/2010 12:15:00 | 28.0 | 7/16/2010 02:46:01 | 24.2163 |
| 7/15/2010 05:22:01 | 23.739 | 10/19/2010 12:50:00 | 28.0 | 7/16/2010 03:06:01 | 24.2163 |
| 7/15/2010 05:42:01 | 23.676 | 10/19/2010 13:25:00 | 28.0 | 7/16/2010 03:26:01 | 24.2163 |
| 7/15/2010 06:02:01 | 23.676 | 10/19/2010 14:00:00 | 28.0 | 7/16/2010 03:46:01 | 24.2163 |
| 7/15/2010 06:22:01 | 23.676 | 10/19/2010 14:35:00 | 28.0 | 7/16/2010 04:06:01 | 24.2163 |
| 7/15/2010 06:42:01 | 23.614 | 10/19/2010 15:10:00 | 28.0 | 7/16/2010 04:26:01 | 24.2163 |
| 7/15/2010 07:02:01 | 23.614 | 10/19/2010 15:45:00 | 28.0 | 7/16/2010 04:46:01 | 24.2163 |
| 7/15/2010 07:22:01 | 23.551 | 10/19/2010 16:20:00 | 28.0 | 7/16/2010 05:06:01 | 24.2163 |
| 7/15/2010 07:42:01 | 23.551 | 10/19/2010 16:55:00 | 28.0 | 7/16/2010 05:26:01 | 24.2163 |
| 7/15/2010 08:02:01 | 23.551 | 10/19/2010 17:30:00 | 28.0 | 7/16/2010 05:46:01 | 24.2163 |
| 7/15/2010 08:22:01 | 23.489 | 10/19/2010 18:05:00 | 28.0 | 7/16/2010 06:06:01 | 24.1543 |
| 7/15/2010 08:42:01 | 23.489 | 10/19/2010 18:40:00 | 28.5 | 7/16/2010 06:26:01 | 24.1543 |
| 7/15/2010 09:02:01 | 23.426 | 10/19/2010 19:15:00 | 28.0 | 7/16/2010 06:46:01 | 24.1543 |
| 7/15/2010 09:22:01 | 23.426 | 10/19/2010 19:50:00 | 28.0 | 7/16/2010 07:06:01 | 24.1543 |
| 7/15/2010 09:42:01 | 23.426 | 10/19/2010 20:25:00 | 28.0 | 7/16/2010 07:26:01 | 24.1543 |
| 7/15/2010 10:02:01 | 23.364 | 10/19/2010 21:00:00 | 28.5 | 7/16/2010 07:46:01 | 24.1543 |
| 7/15/2010 10:22:01 | 23.364 | 10/19/2010 21:35:00 | 28.5 | 7/16/2010 08:06:01 | 24.1543 |
| 7/15/2010 10:42:01 | 23.301 | 10/19/2010 22:10:00 | 28.5 | 7/16/2010 08:26:01 | 24.1543 |
| 7/15/2010 11:02:01 | 23.301 | 10/19/2010 22:45:00 | 28.5 | 7/16/2010 08:46:01 | 24.1543 |
| 7/15/2010 11:22:01 | 23.301 | 10/19/2010 23:20:00 | 28.5 | 7/16/2010 09:06:01 | 24.1543 |
| 7/15/2010 11:42:01 | 23.239 | 10/19/2010 23:55:00 | 28.0 | 7/16/2010 09:26:01 | 24.0913 |
| 7/15/2010 12:02:01 | 23.239 | 10/20/2010 00:30:00 | 28.5 | 7/16/2010 09:46:01 | 24.0913 |
| 7/15/2010 12:22:01 | 23.239 | 10/20/2010 01:05:00 | 28.0 | 7/16/2010 10:06:01 | 24.0913 |
| 7/15/2010 12:42:01 | 23.176 | 10/20/2010 01:40:00 | 28.0 | 7/16/2010 10:26:01 | 24.0913 |
| 7/15/2010 13:02:01 | 23.176 | 10/20/2010 02:15:00 | 28.0 | 7/16/2010 10:46:01 | 24.0293 |
| 7/15/2010 13:22:01 | 23.176 | 10/20/2010 02:50:00 | 28.0 | 7/16/2010 11:06:01 | 24.0293 |
| 7/15/2010 13:42:01 | 23.176 | 10/20/2010 03:25:00 | 28.0 | 7/16/2010 11:26:01 | 24.0293 |
| 7/15/2010 14:02:01 | 23.176 | 10/20/2010 04:00:00 | 28.0 | 7/16/2010 11:46:01 | 24.0293 |
| 7/15/2010 14:22:01 | 23.176 | 10/20/2010 04:35:00 | 28.0 | 7/16/2010 12:06:01 | 24.0293 |
| 7/15/2010 14:42:01 | 23.176 | 10/20/2010 05:10:00 | 28.0 | 7/16/2010 12:26:01 | 24.0293 |
| 7/15/2010 15:02:01 | 23.176 | 10/20/2010 05:45:00 | 28.0 | 7/16/2010 12:46:01 | 23.9663 |
| 7/15/2010 15:22:01 | 23.239 | 10/20/2010 06:20:00 | 28.0 | 7/16/2010 13:06:01 | 23.9663 |
| 7/15/2010 15:42:01 | 23.239 | 10/20/2010 06:55:00 | 28.0 | 7/16/2010 13:26:01 | 23.9663 |

|                    |        |                     |      |                    |         |
|--------------------|--------|---------------------|------|--------------------|---------|
| 7/15/2010 16:02:01 | 23.239 | 10/20/2010 07:30:00 | 28.0 | 7/16/2010 13:46:01 | 23.9663 |
| 7/15/2010 16:22:01 | 23.301 | 10/20/2010 08:05:00 | 28.0 | 7/16/2010 14:06:01 | 23.9663 |
| 7/15/2010 16:42:01 | 23.301 | 10/20/2010 08:40:00 | 28.0 | 7/16/2010 14:26:01 | 23.9663 |
| 7/15/2010 17:02:01 | 23.301 | 10/20/2010 09:15:00 | 28.0 | 7/16/2010 14:46:01 | 23.9043 |
| 7/15/2010 17:22:01 | 23.364 | 10/20/2010 09:50:00 | 28.0 | 7/16/2010 15:06:01 | 23.9043 |
| 7/15/2010 17:42:01 | 23.364 | 10/20/2010 10:25:00 | 27.5 | 7/16/2010 15:26:01 | 23.9043 |
| 7/15/2010 18:02:01 | 23.426 | 10/20/2010 11:00:00 | 28.0 | 7/16/2010 15:46:01 | 23.9043 |
| 7/15/2010 18:22:01 | 23.426 | 10/20/2010 11:35:00 | 28.0 | 7/16/2010 16:06:01 | 23.9043 |
| 7/15/2010 18:42:01 | 23.489 | 10/20/2010 12:10:00 | 28.0 | 7/16/2010 16:26:01 | 23.9043 |
| 7/15/2010 19:02:01 | 23.489 | 10/20/2010 12:45:00 | 28.0 | 7/16/2010 16:46:01 | 23.9043 |
| 7/15/2010 19:22:01 | 23.551 | 10/20/2010 13:20:00 | 28.0 | 7/16/2010 17:06:01 | 23.9043 |
| 7/15/2010 19:42:01 | 23.551 | 10/20/2010 13:55:00 | 28.0 | 7/16/2010 17:26:01 | 23.9043 |
| 7/15/2010 20:02:01 | 23.614 | 10/20/2010 14:30:00 | 28.0 | 7/16/2010 17:46:01 | 23.9043 |
| 7/15/2010 20:22:01 | 23.614 | 10/20/2010 15:05:00 | 28.0 | 7/16/2010 18:06:01 | 23.9043 |
| 7/15/2010 20:42:01 | 23.614 | 10/20/2010 15:40:00 | 28.0 | 7/16/2010 18:26:01 | 23.9043 |
| 7/15/2010 21:02:01 | 23.614 | 10/20/2010 16:15:00 | 28.0 | 7/16/2010 18:46:01 | 23.9663 |
| 7/15/2010 21:22:01 | 23.676 | 10/20/2010 16:50:00 | 28.0 | 7/16/2010 19:06:01 | 23.9663 |
| 7/15/2010 21:42:01 | 23.676 | 10/20/2010 17:25:00 | 28.0 | 7/16/2010 19:26:01 | 23.9663 |
| 7/15/2010 22:02:01 | 23.676 | 10/20/2010 18:00:00 | 28.0 | 7/16/2010 19:46:01 | 23.9663 |
| 7/15/2010 22:22:01 | 23.676 | 10/20/2010 18:35:00 | 28.0 | 7/16/2010 20:06:01 | 23.9663 |
| 7/15/2010 22:42:01 | 23.676 | 10/20/2010 19:10:00 | 28.5 | 7/16/2010 20:26:01 | 23.9663 |
| 7/15/2010 23:02:01 | 23.739 | 10/20/2010 19:45:00 | 28.5 | 7/16/2010 20:46:01 | 23.9663 |
| 7/15/2010 23:22:01 | 23.739 | 10/20/2010 20:20:00 | 28.5 | 7/16/2010 21:06:01 | 24.0293 |
| 7/15/2010 23:42:01 | 23.739 | 10/20/2010 20:55:00 | 28.5 | 7/16/2010 21:26:01 | 24.0293 |
| 7/16/2010 00:02:01 | 23.739 | 10/20/2010 21:30:00 | 28.5 | 7/16/2010 21:46:01 | 24.0293 |
| 7/16/2010 00:22:01 | 23.739 | 10/20/2010 22:05:00 | 28.5 | 7/16/2010 22:06:01 | 24.0293 |
| 7/16/2010 00:42:01 | 23.739 | 10/20/2010 22:40:00 | 28.5 | 7/16/2010 22:26:01 | 24.0293 |
| 7/16/2010 01:02:01 | 23.676 | 10/20/2010 23:15:00 | 28.5 | 7/16/2010 22:46:01 | 24.0913 |
| 7/16/2010 01:22:01 | 23.676 | 10/20/2010 23:50:00 | 28.5 | 7/16/2010 23:06:01 | 24.0913 |
| 7/16/2010 01:42:01 | 23.676 | 10/21/2010 00:25:00 | 28.5 | 7/16/2010 23:26:01 | 24.0913 |
| 7/16/2010 02:02:01 | 23.676 | 10/21/2010 01:00:00 | 28.5 | 7/16/2010 23:46:01 | 24.0913 |
| 7/16/2010 02:22:01 | 23.676 | 10/21/2010 01:35:00 | 28.5 | 7/17/2010 00:06:01 | 24.0913 |
| 7/16/2010 02:42:01 | 23.676 | 10/21/2010 02:10:00 | 28.0 | 7/17/2010 00:26:01 | 24.1543 |
| 7/16/2010 03:02:01 | 23.614 | 10/21/2010 02:45:00 | 28.0 | 7/17/2010 00:46:01 | 24.1543 |
| 7/16/2010 03:22:01 | 23.614 | 10/21/2010 03:20:00 | 28.0 | 7/17/2010 01:06:01 | 24.1543 |
| 7/16/2010 03:42:01 | 23.614 | 10/21/2010 03:55:00 | 28.5 | 7/17/2010 01:26:01 | 24.1543 |
| 7/16/2010 04:02:01 | 23.614 | 10/21/2010 04:30:00 | 28.0 | 7/17/2010 01:46:01 | 24.1543 |
| 7/16/2010 04:22:01 | 23.551 | 10/21/2010 05:05:00 | 28.0 | 7/17/2010 02:06:01 | 24.1543 |
| 7/16/2010 04:42:01 | 23.551 | 10/21/2010 05:40:00 | 28.0 | 7/17/2010 02:26:01 | 24.1543 |
| 7/16/2010 05:02:01 | 23.551 | 10/21/2010 06:15:00 | 28.0 | 7/17/2010 02:46:01 | 24.1543 |
| 7/16/2010 05:22:01 | 23.551 | 10/21/2010 06:50:00 | 28.0 | 7/17/2010 03:06:01 | 24.2163 |
| 7/16/2010 05:42:01 | 23.489 | 10/21/2010 07:25:00 | 28.0 | 7/17/2010 03:26:01 | 24.2163 |
| 7/16/2010 06:02:01 | 23.489 | 10/21/2010 08:00:00 | 28.0 | 7/17/2010 03:46:01 | 24.2163 |
| 7/16/2010 06:22:01 | 23.489 | 10/21/2010 08:35:00 | 28.0 | 7/17/2010 04:06:01 | 24.2163 |
| 7/16/2010 06:42:01 | 23.426 | 10/21/2010 09:10:00 | 28.0 | 7/17/2010 04:26:01 | 24.2163 |
| 7/16/2010 07:02:01 | 23.426 | 10/21/2010 09:45:00 | 28.0 | 7/17/2010 04:46:01 | 24.2163 |
| 7/16/2010 07:22:01 | 23.364 | 10/21/2010 10:20:00 | 28.0 | 7/17/2010 05:06:01 | 24.2163 |
| 7/16/2010 07:42:01 | 23.364 | 10/21/2010 10:55:00 | 28.0 | 7/17/2010 05:26:01 | 24.2163 |
| 7/16/2010 08:02:01 | 23.364 | 10/21/2010 11:30:00 | 28.0 | 7/17/2010 05:46:01 | 24.2163 |
| 7/16/2010 08:22:01 | 23.301 | 10/21/2010 12:05:00 | 28.0 | 7/17/2010 06:06:01 | 24.2163 |

|                    |        |                     |      |                    |         |
|--------------------|--------|---------------------|------|--------------------|---------|
| 7/16/2010 08:42:01 | 23.301 | 10/21/2010 12:40:00 | 28.0 | 7/17/2010 06:26:01 | 24.2163 |
| 7/16/2010 09:02:01 | 23.301 | 10/21/2010 13:15:00 | 28.0 | 7/17/2010 06:46:01 | 24.2163 |
| 7/16/2010 09:22:01 | 23.239 | 10/21/2010 13:50:00 | 28.0 | 7/17/2010 07:06:01 | 24.2163 |
| 7/16/2010 09:42:01 | 23.239 | 10/21/2010 14:25:00 | 28.0 | 7/17/2010 07:26:01 | 24.2163 |
| 7/16/2010 10:02:01 | 23.239 | 10/21/2010 15:00:00 | 28.0 | 7/17/2010 07:46:01 | 24.2163 |
| 7/16/2010 10:22:01 | 23.176 | 10/21/2010 15:35:00 | 28.0 | 7/17/2010 08:06:01 | 24.2163 |
| 7/16/2010 10:42:01 | 23.176 | 10/21/2010 16:10:00 | 28.0 | 7/17/2010 08:26:01 | 24.2163 |
| 7/16/2010 11:02:01 | 23.114 | 10/21/2010 16:45:00 | 28.0 | 7/17/2010 08:46:01 | 24.1543 |
| 7/16/2010 11:22:01 | 23.114 | 10/21/2010 17:20:00 | 28.5 | 7/17/2010 09:06:01 | 24.1543 |
| 7/16/2010 11:42:01 | 23.114 | 10/21/2010 17:55:00 | 28.5 | 7/17/2010 09:26:01 | 24.1543 |
| 7/16/2010 12:02:01 | 23.051 | 10/21/2010 18:30:00 | 28.5 | 7/17/2010 09:46:01 | 24.1543 |
| 7/16/2010 12:22:01 | 23.051 | 10/21/2010 19:05:00 | 28.5 | 7/17/2010 10:06:01 | 24.1543 |
| 7/16/2010 12:42:01 | 23.051 | 10/21/2010 19:40:00 | 28.5 | 7/17/2010 10:26:01 | 24.1543 |
| 7/16/2010 13:02:01 | 23.051 | 10/21/2010 20:15:00 | 28.5 | 7/17/2010 10:46:01 | 24.1543 |
| 7/16/2010 13:22:01 | 23.051 | 10/21/2010 20:50:00 | 28.5 | 7/17/2010 11:06:01 | 24.1543 |
| 7/16/2010 13:42:01 | 23.051 | 10/21/2010 21:25:00 | 28.5 | 7/17/2010 11:26:01 | 24.1543 |
| 7/16/2010 14:02:01 | 23.051 | 10/21/2010 22:00:00 | 28.5 | 7/17/2010 11:46:01 | 24.1543 |
| 7/16/2010 14:22:01 | 23.051 | 10/21/2010 22:35:00 | 28.5 | 7/17/2010 12:06:01 | 24.0913 |
| 7/16/2010 14:42:01 | 23.051 | 10/21/2010 23:10:00 | 28.5 | 7/17/2010 12:26:01 | 24.1543 |
| 7/16/2010 15:02:01 | 23.051 | 10/21/2010 23:45:00 | 28.5 | 7/17/2010 12:46:01 | 24.0913 |
| 7/16/2010 15:22:01 | 23.114 | 10/22/2010 00:20:00 | 28.5 | 7/17/2010 13:06:01 | 24.0913 |
| 7/16/2010 15:42:01 | 23.114 | 10/22/2010 00:55:00 | 28.5 | 7/17/2010 13:26:01 | 24.0913 |
| 7/16/2010 16:02:01 | 23.114 | 10/22/2010 01:30:00 | 28.5 | 7/17/2010 13:46:01 | 24.0913 |
| 7/16/2010 16:22:01 | 23.176 | 10/22/2010 02:05:00 | 28.5 | 7/17/2010 14:06:01 | 24.0913 |
| 7/16/2010 16:42:01 | 23.176 | 10/22/2010 02:40:00 | 28.5 | 7/17/2010 14:26:01 | 24.0913 |
| 7/16/2010 17:02:01 | 23.239 | 10/22/2010 03:15:00 | 28.5 | 7/17/2010 14:46:01 | 24.0913 |
| 7/16/2010 17:22:01 | 23.239 | 10/22/2010 03:50:00 | 28.5 | 7/17/2010 15:06:01 | 24.0913 |
| 7/16/2010 17:42:01 | 23.301 | 10/22/2010 04:25:00 | 28.5 | 7/17/2010 15:26:01 | 24.0913 |
| 7/16/2010 18:02:01 | 23.364 | 10/22/2010 05:00:00 | 28.5 | 7/17/2010 15:46:01 | 24.0913 |
| 7/16/2010 18:22:01 | 23.364 | 10/22/2010 05:35:00 | 28.5 | 7/17/2010 16:06:01 | 24.0913 |
| 7/16/2010 18:42:01 | 23.426 | 10/22/2010 06:10:00 | 28.5 | 7/17/2010 16:26:01 | 24.0913 |
| 7/16/2010 19:02:01 | 23.426 | 10/22/2010 06:45:00 | 28.0 | 7/17/2010 16:46:01 | 24.0913 |
| 7/16/2010 19:22:01 | 23.489 | 10/22/2010 07:20:00 | 28.0 | 7/17/2010 17:06:01 | 24.0913 |
| 7/16/2010 19:42:01 | 23.489 | 10/22/2010 07:55:00 | 28.0 | 7/17/2010 17:26:01 | 24.0913 |
| 7/16/2010 20:02:01 | 23.551 | 10/22/2010 08:30:00 | 28.0 | 7/17/2010 17:46:01 | 24.0913 |
| 7/16/2010 20:22:01 | 23.551 | 10/22/2010 09:05:00 | 28.0 | 7/17/2010 18:06:01 | 24.0913 |
| 7/16/2010 20:42:01 | 23.551 | 10/22/2010 09:40:00 | 28.0 | 7/17/2010 18:26:01 | 24.0913 |
| 7/16/2010 21:02:01 | 23.614 | 10/22/2010 10:15:00 | 28.0 | 7/17/2010 18:46:01 | 24.0913 |
| 7/16/2010 21:22:01 | 23.614 | 10/22/2010 10:50:00 | 28.0 | 7/17/2010 19:06:01 | 24.0913 |
| 7/16/2010 21:42:01 | 23.614 | 10/22/2010 11:25:00 | 28.0 | 7/17/2010 19:26:01 | 24.1543 |
| 7/16/2010 22:02:01 | 23.676 | 10/22/2010 12:00:00 | 28.0 | 7/17/2010 19:46:01 | 24.1543 |
| 7/16/2010 22:22:01 | 23.676 | 10/22/2010 12:35:00 | 28.0 | 7/17/2010 20:06:01 | 24.1543 |
| 7/16/2010 22:42:01 | 23.676 | 10/22/2010 13:10:00 | 28.0 | 7/17/2010 20:26:01 | 24.1543 |
| 7/16/2010 23:02:01 | 23.676 | 10/22/2010 13:45:00 | 28.0 | 7/17/2010 20:46:01 | 24.1543 |
| 7/16/2010 23:22:01 | 23.676 | 10/22/2010 14:20:00 | 28.0 | 7/17/2010 21:06:01 | 24.2163 |
| 7/16/2010 23:42:01 | 23.676 | 10/22/2010 14:55:00 | 28.0 | 7/17/2010 21:26:01 | 24.2163 |
| 7/17/2010 00:02:01 | 23.739 | 10/22/2010 15:30:00 | 28.0 | 7/17/2010 21:46:01 | 24.2163 |
| 7/17/2010 00:22:01 | 23.739 | 10/22/2010 16:05:00 | 28.0 | 7/17/2010 22:06:01 | 24.2163 |
| 7/17/2010 00:42:01 | 23.739 | 10/22/2010 16:40:00 | 28.0 | 7/17/2010 22:26:01 | 24.2163 |
| 7/17/2010 01:02:01 | 23.739 | 10/22/2010 17:15:00 | 28.5 | 7/17/2010 22:46:01 | 24.2793 |



|                    |        |                     |      |                    |         |
|--------------------|--------|---------------------|------|--------------------|---------|
| 7/17/2010 01:22:01 | 23.739 | 10/22/2010 17:50:00 | 28.5 | 7/17/2010 23:06:01 | 24.2793 |
| 7/17/2010 01:42:01 | 23.739 | 10/22/2010 18:25:00 | 28.5 | 7/17/2010 23:26:01 | 24.2793 |
| 7/17/2010 02:02:01 | 23.676 | 10/22/2010 19:00:00 | 28.5 | 7/17/2010 23:46:01 | 24.2793 |
| 7/17/2010 02:22:01 | 23.676 | 10/22/2010 19:35:00 | 28.5 | 7/18/2010 00:06:01 | 24.2793 |
| 7/17/2010 02:42:01 | 23.676 | 10/22/2010 20:10:00 | 28.5 | 7/18/2010 00:26:01 | 24.3413 |
| 7/17/2010 03:02:01 | 23.676 | 10/22/2010 20:45:00 | 28.5 | 7/18/2010 00:46:01 | 24.3413 |
| 7/17/2010 03:22:01 | 23.676 | 10/22/2010 21:20:00 | 28.5 | 7/18/2010 01:06:01 | 24.3413 |
| 7/17/2010 03:42:01 | 23.676 | 10/22/2010 21:55:00 | 28.5 | 7/18/2010 01:26:01 | 24.3413 |
| 7/17/2010 04:02:01 | 23.676 | 10/22/2010 22:30:00 | 28.5 | 7/18/2010 01:46:01 | 24.3413 |
| 7/17/2010 04:22:01 | 23.614 | 10/22/2010 23:05:00 | 28.5 | 7/18/2010 02:06:01 | 24.3413 |
| 7/17/2010 04:42:01 | 23.614 | 10/22/2010 23:40:00 | 28.5 | 7/18/2010 02:26:01 | 24.3413 |
| 7/17/2010 05:02:01 | 23.614 | 10/23/2010 00:15:00 | 28.5 | 7/18/2010 02:46:01 | 24.3413 |
| 7/17/2010 05:22:01 | 23.614 | 10/23/2010 00:50:00 | 28.5 | 7/18/2010 03:06:01 | 24.4043 |
| 7/17/2010 05:42:01 | 23.614 | 10/23/2010 01:25:00 | 28.5 | 7/18/2010 03:26:01 | 24.4043 |
| 7/17/2010 06:02:01 | 23.614 | 10/23/2010 02:00:00 | 28.5 | 7/18/2010 03:46:01 | 24.4043 |
| 7/17/2010 06:22:01 | 23.551 | 10/23/2010 02:35:00 | 28.5 | 7/18/2010 04:06:01 | 24.4043 |
| 7/17/2010 06:42:01 | 23.551 | 10/23/2010 03:10:00 | 28.0 | 7/18/2010 04:26:01 | 24.4043 |
| 7/17/2010 07:02:01 | 23.551 | 10/23/2010 03:45:00 | 28.0 | 7/18/2010 04:46:01 | 24.4043 |
| 7/17/2010 07:22:01 | 23.551 | 10/23/2010 04:20:00 | 28.0 | 7/18/2010 05:06:01 | 24.4043 |
| 7/17/2010 07:42:01 | 23.489 | 10/23/2010 04:55:00 | 28.0 | 7/18/2010 05:26:01 | 24.4043 |
| 7/17/2010 08:02:01 | 23.489 | 10/23/2010 05:30:00 | 28.0 | 7/18/2010 05:46:01 | 24.4043 |
| 7/17/2010 08:22:01 | 23.489 | 10/23/2010 06:05:00 | 28.0 | 7/18/2010 06:06:01 | 24.4043 |
| 7/17/2010 08:42:01 | 23.489 | 10/23/2010 06:40:00 | 28.0 | 7/18/2010 06:26:01 | 24.4043 |
| 7/17/2010 09:02:01 | 23.426 | 10/23/2010 07:15:00 | 28.0 | 7/18/2010 06:46:01 | 24.4043 |
| 7/17/2010 09:22:01 | 23.426 | 10/23/2010 07:50:00 | 28.0 | 7/18/2010 07:06:01 | 24.4043 |
| 7/17/2010 09:42:01 | 23.426 | 10/23/2010 08:25:00 | 28.0 | 7/18/2010 07:26:01 | 24.4043 |
| 7/17/2010 10:02:01 | 23.364 | 10/23/2010 09:00:00 | 28.0 | 7/18/2010 07:46:01 | 24.4043 |
| 7/17/2010 10:22:01 | 23.364 | 10/23/2010 09:35:00 | 28.0 | 7/18/2010 08:06:01 | 24.4043 |
| 7/17/2010 10:42:01 | 23.364 | 10/23/2010 10:10:00 | 27.5 | 7/18/2010 08:26:01 | 24.4043 |
| 7/17/2010 11:02:01 | 23.364 | 10/23/2010 10:45:00 | 27.5 | 7/18/2010 08:46:01 | 24.4043 |
| 7/17/2010 11:22:01 | 23.301 | 10/23/2010 11:20:00 | 27.5 | 7/18/2010 09:06:01 | 24.4043 |
| 7/17/2010 11:42:01 | 23.301 | 10/23/2010 11:55:00 | 27.5 | 7/18/2010 09:26:01 | 24.4043 |
| 7/17/2010 12:02:01 | 23.301 | 10/23/2010 12:30:00 | 28.0 | 7/18/2010 09:46:01 | 24.4043 |
| 7/17/2010 12:22:01 | 23.301 | 10/23/2010 13:05:00 | 28.0 | 7/18/2010 10:06:01 | 24.4043 |
| 7/17/2010 12:42:01 | 23.301 | 10/23/2010 13:40:00 | 28.0 | 7/18/2010 10:26:01 | 24.4043 |
| 7/17/2010 13:02:01 | 23.301 | 10/23/2010 14:15:00 | 28.0 | 7/18/2010 10:46:01 | 24.4043 |
| 7/17/2010 13:22:01 | 23.301 | 10/23/2010 14:50:00 | 28.0 | 7/18/2010 11:06:01 | 24.4043 |
| 7/17/2010 13:42:01 | 23.301 | 10/23/2010 15:25:00 | 28.0 | 7/18/2010 11:26:01 | 24.4043 |
| 7/17/2010 14:02:01 | 23.301 | 10/23/2010 16:00:00 | 28.0 | 7/18/2010 11:46:01 | 24.4043 |
| 7/17/2010 14:22:01 | 23.301 | 10/23/2010 16:35:00 | 28.0 | 7/18/2010 12:06:01 | 24.4043 |
| 7/17/2010 14:42:01 | 23.301 | 10/23/2010 17:10:00 | 28.0 | 7/18/2010 12:26:01 | 24.4043 |
| 7/17/2010 15:02:01 | 23.301 | 10/23/2010 17:45:00 | 28.5 | 7/18/2010 12:46:01 | 24.4043 |
| 7/17/2010 15:22:01 | 23.364 | 10/23/2010 18:20:00 | 28.0 | 7/18/2010 13:06:01 | 24.3413 |
| 7/17/2010 15:42:01 | 23.364 | 10/23/2010 18:55:00 | 28.0 | 7/18/2010 13:26:01 | 24.4043 |
| 7/17/2010 16:02:01 | 23.364 | 10/23/2010 19:30:00 | 28.5 | 7/18/2010 13:46:01 | 24.3413 |
| 7/17/2010 16:22:01 | 23.426 | 10/23/2010 20:05:00 | 28.5 | 7/18/2010 14:06:01 | 24.3413 |
| 7/17/2010 16:42:01 | 23.426 | 10/23/2010 20:40:00 | 28.5 | 7/18/2010 14:26:01 | 24.3413 |
| 7/17/2010 17:02:01 | 23.489 | 10/23/2010 21:15:00 | 28.5 | 7/18/2010 14:46:01 | 24.3413 |
| 7/17/2010 17:22:01 | 23.489 | 10/23/2010 21:50:00 | 28.0 | 7/18/2010 15:06:01 | 24.3413 |
| 7/17/2010 17:42:01 | 23.551 | 10/23/2010 22:25:00 | 28.5 | 7/18/2010 15:26:01 | 24.3413 |

|                    |        |                     |      |                    |         |
|--------------------|--------|---------------------|------|--------------------|---------|
| 7/17/2010 18:02:01 | 23.614 | 10/23/2010 23:00:00 | 28.0 | 7/18/2010 15:46:01 | 24.3413 |
| 7/17/2010 18:22:01 | 23.614 | 10/23/2010 23:35:00 | 28.0 | 7/18/2010 16:06:01 | 24.3413 |
| 7/17/2010 18:42:01 | 23.676 | 10/24/2010 00:10:00 | 28.0 | 7/18/2010 16:26:01 | 24.3413 |
| 7/17/2010 19:02:01 | 23.676 | 10/24/2010 00:45:00 | 28.0 | 7/18/2010 16:46:01 | 24.3413 |
| 7/17/2010 19:22:01 | 23.739 | 10/24/2010 01:20:00 | 28.0 | 7/18/2010 17:06:01 | 24.3413 |
| 7/17/2010 19:42:01 | 23.739 | 10/24/2010 01:55:00 | 28.0 | 7/18/2010 17:26:01 | 24.4043 |
| 7/17/2010 20:02:01 | 23.801 | 10/24/2010 02:30:00 | 28.0 | 7/18/2010 17:46:01 | 24.4043 |
| 7/17/2010 20:22:01 | 23.801 | 10/24/2010 03:05:00 | 28.0 | 7/18/2010 18:06:01 | 24.4043 |
| 7/17/2010 20:42:01 | 23.801 | 10/24/2010 03:40:00 | 28.0 | 7/18/2010 18:26:01 | 24.4043 |
| 7/17/2010 21:02:01 | 23.864 | 10/24/2010 04:15:00 | 28.0 | 7/18/2010 18:46:01 | 24.4043 |
| 7/17/2010 21:22:01 | 23.864 | 10/24/2010 04:50:00 | 28.0 | 7/18/2010 19:06:01 | 24.4043 |
| 7/17/2010 21:42:01 | 23.864 | 10/24/2010 05:25:00 | 28.0 | 7/18/2010 19:26:01 | 24.4043 |
| 7/17/2010 22:02:01 | 23.926 | 10/24/2010 06:00:00 | 28.0 | 7/18/2010 19:46:01 | 24.4663 |
| 7/17/2010 22:22:01 | 23.926 | 10/24/2010 06:35:00 | 28.0 | 7/18/2010 20:06:01 | 24.4663 |
| 7/17/2010 22:42:01 | 23.926 | 10/24/2010 07:10:00 | 27.5 | 7/18/2010 20:26:01 | 24.4663 |
| 7/17/2010 23:02:01 | 23.926 | 10/24/2010 07:45:00 | 27.5 | 7/18/2010 20:46:01 | 24.4663 |
| 7/17/2010 23:22:01 | 23.926 | 10/24/2010 08:20:00 | 27.5 | 7/18/2010 21:06:01 | 24.5293 |
| 7/17/2010 23:42:01 | 23.926 | 10/24/2010 08:55:00 | 27.5 | 7/18/2010 21:26:01 | 24.5293 |
| 7/18/2010 00:02:01 | 23.926 | 10/24/2010 09:30:00 | 27.5 | 7/18/2010 21:46:01 | 24.5293 |
| 7/18/2010 00:22:01 | 23.926 | 10/24/2010 10:05:00 | 27.5 | 7/18/2010 22:06:01 | 24.5293 |
| 7/18/2010 00:42:01 | 23.926 | 10/24/2010 10:40:00 | 27.5 | 7/18/2010 22:26:01 | 24.5293 |
| 7/18/2010 01:02:01 | 23.926 | 10/24/2010 11:15:00 | 27.5 | 7/18/2010 22:46:01 | 24.5913 |
| 7/18/2010 01:22:01 | 23.926 | 10/24/2010 11:50:00 | 27.5 | 7/18/2010 23:06:01 | 24.5913 |
| 7/18/2010 01:42:01 | 23.926 | 10/24/2010 12:25:00 | 27.5 | 7/18/2010 23:26:01 | 24.5913 |
| 7/18/2010 02:02:01 | 23.926 | 10/24/2010 13:00:00 | 27.5 | 7/18/2010 23:46:01 | 24.5913 |
| 7/18/2010 02:22:01 | 23.926 | 10/24/2010 13:35:00 | 27.5 | 7/19/2010 00:06:01 | 24.5913 |
| 7/18/2010 02:42:01 | 23.926 | 10/24/2010 14:10:00 | 28.0 | 7/19/2010 00:26:01 | 24.6543 |
| 7/18/2010 03:02:01 | 23.926 | 10/24/2010 14:45:00 | 28.0 | 7/19/2010 00:46:01 | 24.6543 |
| 7/18/2010 03:22:01 | 23.926 | 10/24/2010 15:20:00 | 28.0 | 7/19/2010 01:06:01 | 24.6543 |
| 7/18/2010 03:42:01 | 23.926 | 10/24/2010 15:55:00 | 28.0 | 7/19/2010 01:26:01 | 24.6543 |
| 7/18/2010 04:02:01 | 23.926 | 10/24/2010 16:30:00 | 28.0 | 7/19/2010 01:46:01 | 24.6543 |
| 7/18/2010 04:22:01 | 23.926 | 10/24/2010 17:05:00 | 28.0 | 7/19/2010 02:06:01 | 24.6543 |
| 7/18/2010 04:42:01 | 23.926 | 10/24/2010 17:40:00 | 28.0 | 7/19/2010 02:26:01 | 24.7173 |
| 7/18/2010 05:02:01 | 23.864 | 10/24/2010 18:15:00 | 28.5 | 7/19/2010 02:46:01 | 24.7173 |
| 7/18/2010 05:22:01 | 23.864 | 10/24/2010 18:50:00 | 28.5 | 7/19/2010 03:06:01 | 24.7173 |
| 7/18/2010 05:42:01 | 23.864 | 10/24/2010 19:25:00 | 28.5 | 7/19/2010 03:26:01 | 24.7173 |
| 7/18/2010 06:02:01 | 23.864 | 10/24/2010 20:00:00 | 28.5 | 7/19/2010 03:46:01 | 24.7173 |
| 7/18/2010 06:22:01 | 23.864 | 10/24/2010 20:35:00 | 28.5 | 7/19/2010 04:06:01 | 24.7173 |
| 7/18/2010 06:42:01 | 23.864 | 10/24/2010 21:10:00 | 28.5 | 7/19/2010 04:26:01 | 24.7173 |
| 7/18/2010 07:02:01 | 23.864 | 10/24/2010 21:45:00 | 28.5 | 7/19/2010 04:46:01 | 24.7173 |
| 7/18/2010 07:22:01 | 23.801 | 10/24/2010 22:20:00 | 28.5 | 7/19/2010 05:06:01 | 24.7173 |
| 7/18/2010 07:42:01 | 23.801 | 10/24/2010 22:55:00 | 28.5 | 7/19/2010 05:26:01 | 24.7173 |
| 7/18/2010 08:02:01 | 23.801 | 10/24/2010 23:30:00 | 28.5 | 7/19/2010 05:46:01 | 24.7173 |
| 7/18/2010 08:22:01 | 23.801 | 10/25/2010 00:05:00 | 28.5 | 7/19/2010 06:06:01 | 24.7173 |
| 7/18/2010 08:42:01 | 23.801 | 10/25/2010 00:40:00 | 28.5 | 7/19/2010 06:26:01 | 24.7173 |
| 7/18/2010 09:02:01 | 23.801 | 10/25/2010 01:15:00 | 28.5 | 7/19/2010 06:46:01 | 24.7173 |
| 7/18/2010 09:22:01 | 23.801 | 10/25/2010 01:50:00 | 28.5 | 7/19/2010 07:06:01 | 24.7173 |
| 7/18/2010 09:42:01 | 23.801 | 10/25/2010 02:25:00 | 28.5 | 7/19/2010 07:26:01 | 24.7173 |
| 7/18/2010 10:02:01 | 23.739 | 10/25/2010 03:00:00 | 28.5 | 7/19/2010 07:46:01 | 24.7173 |
| 7/18/2010 10:22:01 | 23.739 | 10/25/2010 03:35:00 | 28.0 | 7/19/2010 08:06:01 | 24.7173 |

|                    |        |                     |      |                    |         |
|--------------------|--------|---------------------|------|--------------------|---------|
| 7/18/2010 10:42:01 | 23.739 | 10/25/2010 04:10:00 | 28.0 | 7/19/2010 08:26:01 | 24.7173 |
| 7/18/2010 11:02:01 | 23.739 | 10/25/2010 04:45:00 | 28.0 | 7/19/2010 08:46:01 | 24.7173 |
| 7/18/2010 11:22:01 | 23.739 | 10/25/2010 05:20:00 | 28.0 | 7/19/2010 09:06:01 | 24.7173 |
| 7/18/2010 11:42:01 | 23.676 | 10/25/2010 05:55:00 | 28.0 | 7/19/2010 09:26:01 | 24.7173 |
| 7/18/2010 12:02:01 | 23.676 | 10/25/2010 06:30:00 | 28.0 | 7/19/2010 09:46:01 | 24.7173 |
| 7/18/2010 12:22:01 | 23.676 | 10/25/2010 07:05:00 | 28.0 | 7/19/2010 10:06:01 | 24.7173 |
| 7/18/2010 12:42:01 | 23.676 | 10/25/2010 07:40:00 | 28.0 | 7/19/2010 10:26:01 | 24.6543 |
| 7/18/2010 13:02:01 | 23.676 | 10/25/2010 08:15:00 | 28.0 | 7/19/2010 10:46:01 | 24.6543 |
| 7/18/2010 13:22:01 | 23.676 | 10/25/2010 08:50:00 | 27.5 | 7/19/2010 11:06:01 | 24.6543 |
| 7/18/2010 13:42:01 | 23.676 | 10/25/2010 09:25:00 | 27.5 | 7/19/2010 11:26:01 | 24.6543 |
| 7/18/2010 14:02:01 | 23.676 | 10/25/2010 10:00:00 | 27.5 | 7/19/2010 11:46:01 | 24.6543 |
| 7/18/2010 14:22:01 | 23.676 | 10/25/2010 10:35:00 | 27.5 | 7/19/2010 12:06:01 | 24.6543 |
| 7/18/2010 14:42:01 | 23.676 | 10/25/2010 11:10:00 | 27.5 | 7/19/2010 12:26:01 | 24.6543 |
| 7/18/2010 15:02:01 | 23.739 | 10/25/2010 11:45:00 | 27.5 | 7/19/2010 12:46:01 | 24.5913 |
| 7/18/2010 15:22:01 | 23.739 | 10/25/2010 12:20:00 | 27.5 | 7/19/2010 13:06:01 | 24.5913 |
| 7/18/2010 15:42:01 | 23.739 | 10/25/2010 12:55:00 | 27.5 | 7/19/2010 13:26:01 | 24.5913 |
| 7/18/2010 16:02:01 | 23.801 | 10/25/2010 13:30:00 | 27.5 | 7/19/2010 13:46:01 | 24.5913 |
| 7/18/2010 16:22:01 | 23.801 | 10/25/2010 14:05:00 | 28.0 | 7/19/2010 14:06:01 | 24.5913 |
| 7/18/2010 16:42:01 | 23.864 | 10/25/2010 14:40:00 | 28.0 | 7/19/2010 14:26:01 | 24.5913 |
| 7/18/2010 17:02:01 | 23.864 | 10/25/2010 15:15:00 | 28.0 | 7/19/2010 14:46:01 | 24.5913 |
| 7/18/2010 17:22:01 | 23.926 | 10/25/2010 15:50:00 | 28.0 | 7/19/2010 15:06:01 | 24.5913 |
| 7/18/2010 17:42:01 | 23.926 | 10/25/2010 16:25:00 | 28.0 | 7/19/2010 15:26:01 | 24.5913 |
| 7/18/2010 18:02:01 | 23.989 | 10/25/2010 17:00:00 | 28.0 | 7/19/2010 15:46:01 | 24.5913 |
| 7/18/2010 18:22:01 | 23.989 | 10/25/2010 17:35:00 | 28.5 | 7/19/2010 16:06:01 | 24.5913 |
| 7/18/2010 18:42:01 | 24.051 | 10/25/2010 18:10:00 | 28.5 | 7/19/2010 16:26:01 | 24.5913 |
| 7/18/2010 19:02:01 | 24.051 | 10/25/2010 18:45:00 | 28.5 | 7/19/2010 16:46:01 | 24.5913 |
| 7/18/2010 19:22:01 | 24.114 | 10/25/2010 19:20:00 | 28.5 | 7/19/2010 17:06:01 | 24.5913 |
| 7/18/2010 19:42:01 | 24.114 | 10/25/2010 19:55:00 | 28.5 | 7/19/2010 17:26:01 | 24.5913 |
| 7/18/2010 20:02:01 | 24.114 | 10/25/2010 20:30:00 | 28.5 | 7/19/2010 17:46:01 | 24.5913 |
| 7/18/2010 20:22:01 | 24.176 | 10/25/2010 21:05:00 | 28.5 | 7/19/2010 18:06:01 | 24.5913 |
| 7/18/2010 20:42:01 | 24.176 | 10/25/2010 21:40:00 | 28.5 | 7/19/2010 18:26:01 | 24.5913 |
| 7/18/2010 21:02:01 | 24.239 | 10/25/2010 22:15:00 | 28.5 | 7/19/2010 18:46:01 | 24.5913 |
| 7/18/2010 21:22:01 | 24.239 | 10/25/2010 22:50:00 | 28.5 | 7/19/2010 19:06:01 | 24.5913 |
| 7/18/2010 21:42:01 | 24.239 | 10/25/2010 23:25:00 | 28.5 | 7/19/2010 19:26:01 | 24.5913 |
| 7/18/2010 22:02:01 | 24.239 | 10/26/2010 00:00:00 | 28.5 | 7/19/2010 19:46:01 | 24.5913 |
| 7/18/2010 22:22:01 | 24.239 | 10/26/2010 00:35:00 | 28.5 | 7/19/2010 20:06:01 | 24.6543 |
| 7/18/2010 22:42:01 | 24.301 | 10/26/2010 01:10:00 | 28.5 | 7/19/2010 20:26:01 | 24.6543 |
| 7/18/2010 23:02:01 | 24.301 | 10/26/2010 01:45:00 | 28.5 | 7/19/2010 20:46:01 | 24.6543 |
| 7/18/2010 23:22:01 | 24.301 | 10/26/2010 02:20:00 | 28.5 | 7/19/2010 21:06:01 | 24.6543 |
| 7/18/2010 23:42:01 | 24.301 | 10/26/2010 02:55:00 | 28.0 | 7/19/2010 21:26:01 | 24.6543 |
| 7/19/2010 00:02:01 | 24.301 | 10/26/2010 03:30:00 | 28.0 | 7/19/2010 21:46:01 | 24.6543 |
| 7/19/2010 00:22:01 | 24.301 | 10/26/2010 04:05:00 | 28.0 | 7/19/2010 22:06:01 | 24.7173 |
| 7/19/2010 00:42:01 | 24.301 | 10/26/2010 04:40:00 | 28.0 | 7/19/2010 22:26:01 | 24.7173 |
| 7/19/2010 01:02:01 | 24.301 | 10/26/2010 05:15:00 | 28.0 | 7/19/2010 22:46:01 | 24.7173 |
| 7/19/2010 01:22:01 | 24.301 | 10/26/2010 05:50:00 | 28.0 | 7/19/2010 23:06:01 | 24.7173 |
| 7/19/2010 01:42:01 | 24.301 | 10/26/2010 06:25:00 | 28.0 | 7/19/2010 23:26:01 | 24.7173 |
| 7/19/2010 02:02:01 | 24.301 | 10/26/2010 07:00:00 | 28.0 | 7/19/2010 23:46:01 | 24.7173 |
| 7/19/2010 02:22:01 | 24.301 | 10/26/2010 07:35:00 | 28.0 | 7/20/2010 00:06:01 | 24.7793 |
| 7/19/2010 02:42:01 | 24.301 | 10/26/2010 08:10:00 | 28.0 | 7/20/2010 00:26:01 | 24.7793 |
| 7/19/2010 03:02:01 | 24.301 | 10/26/2010 08:45:00 | 28.0 | 7/20/2010 00:46:01 | 24.7793 |

|                    |        |                     |      |                    |         |
|--------------------|--------|---------------------|------|--------------------|---------|
| 7/19/2010 03:22:01 | 24.301 | 10/26/2010 09:20:00 | 27.5 | 7/20/2010 01:06:01 | 24.7793 |
| 7/19/2010 03:42:01 | 24.239 | 10/26/2010 09:55:00 | 27.5 | 7/20/2010 01:26:01 | 24.7793 |
| 7/19/2010 04:02:01 | 24.239 | 10/26/2010 10:30:00 | 27.5 | 7/20/2010 01:46:01 | 24.7793 |
| 7/19/2010 04:22:01 | 24.239 | 10/26/2010 11:05:00 | 27.5 | 7/20/2010 02:06:01 | 24.7793 |
| 7/19/2010 04:42:01 | 24.239 | 10/26/2010 11:40:00 | 27.5 | 7/20/2010 02:26:01 | 24.7793 |
| 7/19/2010 05:02:01 | 24.239 | 10/26/2010 12:15:00 | 27.5 | 7/20/2010 02:46:01 | 24.7793 |
| 7/19/2010 05:22:01 | 24.239 | 10/26/2010 12:50:00 | 28.0 | 7/20/2010 03:06:01 | 24.7793 |
| 7/19/2010 05:42:01 | 24.176 | 10/26/2010 13:25:00 | 28.0 | 7/20/2010 03:26:01 | 24.7793 |
| 7/19/2010 06:02:01 | 24.176 | 10/26/2010 14:00:00 | 28.0 | 7/20/2010 03:46:01 | 24.7793 |
| 7/19/2010 06:22:01 | 24.176 | 10/26/2010 14:35:00 | 28.5 | 7/20/2010 04:06:01 | 24.7793 |
| 7/19/2010 06:42:01 | 24.176 | 10/26/2010 15:10:00 | 28.5 | 7/20/2010 04:26:01 | 24.7793 |
| 7/19/2010 07:02:01 | 24.114 | 10/26/2010 15:45:00 | 28.5 | 7/20/2010 04:46:01 | 24.7793 |
| 7/19/2010 07:22:01 | 24.114 | 10/26/2010 16:20:00 | 28.5 | 7/20/2010 05:06:01 | 24.7793 |
| 7/19/2010 07:42:01 | 24.114 | 10/26/2010 16:55:00 | 28.5 | 7/20/2010 05:26:01 | 24.7793 |
| 7/19/2010 08:02:01 | 24.051 | 10/26/2010 17:30:00 | 28.5 | 7/20/2010 05:46:01 | 24.7793 |
| 7/19/2010 08:22:01 | 24.051 | 10/26/2010 18:05:00 | 28.5 | 7/20/2010 06:06:01 | 24.7793 |
| 7/19/2010 08:42:01 | 24.051 | 10/26/2010 18:40:00 | 29.0 | 7/20/2010 06:26:01 | 24.7793 |
| 7/19/2010 09:02:01 | 24.051 | 10/26/2010 19:15:00 | 29.0 | 7/20/2010 06:46:01 | 24.7793 |
| 7/19/2010 09:22:01 | 23.989 | 10/26/2010 19:50:00 | 29.0 | 7/20/2010 07:06:01 | 24.7793 |
| 7/19/2010 09:42:01 | 23.989 | 10/26/2010 20:25:00 | 28.5 | 7/20/2010 07:26:01 | 24.7793 |
| 7/19/2010 10:02:01 | 23.989 | 10/26/2010 21:00:00 | 29.0 | 7/20/2010 07:46:01 | 24.7173 |
| 7/19/2010 10:22:01 | 23.989 | 10/26/2010 21:35:00 | 29.0 | 7/20/2010 08:06:01 | 24.7173 |
| 7/19/2010 10:42:01 | 23.926 | 10/26/2010 22:10:00 | 28.5 | 7/20/2010 08:26:01 | 24.7173 |
| 7/19/2010 11:02:01 | 23.926 | 10/26/2010 22:45:00 | 28.5 | 7/20/2010 08:46:01 | 24.7173 |
| 7/19/2010 11:22:01 | 23.926 | 10/26/2010 23:20:00 | 28.5 | 7/20/2010 09:06:01 | 24.7173 |
| 7/19/2010 11:42:01 | 23.926 | 10/26/2010 23:55:00 | 28.5 | 7/20/2010 09:26:01 | 24.7173 |
| 7/19/2010 12:02:01 | 23.864 | 10/27/2010 00:30:00 | 28.5 | 7/20/2010 09:46:01 | 24.6543 |
| 7/19/2010 12:22:01 | 23.864 | 10/27/2010 01:05:00 | 28.5 | 7/20/2010 10:06:01 | 24.6543 |
| 7/19/2010 12:42:01 | 23.864 | 10/27/2010 01:40:00 | 28.5 | 7/20/2010 10:26:01 | 24.6543 |
| 7/19/2010 13:02:01 | 23.864 | 10/27/2010 02:15:00 | 28.5 | 7/20/2010 10:46:01 | 24.6543 |
| 7/19/2010 13:22:01 | 23.864 | 10/27/2010 02:50:00 | 28.5 | 7/20/2010 11:06:01 | 24.6543 |
| 7/19/2010 13:42:01 | 23.864 | 10/27/2010 03:25:00 | 28.5 | 7/20/2010 11:26:01 | 24.6543 |
| 7/19/2010 14:02:01 | 23.864 | 10/27/2010 04:00:00 | 28.5 | 7/20/2010 11:46:01 | 24.6543 |
| 7/19/2010 14:22:01 | 23.864 | 10/27/2010 04:35:00 | 28.5 | 7/20/2010 12:06:01 | 24.5913 |
| 7/19/2010 14:42:01 | 23.864 | 10/27/2010 05:10:00 | 28.5 | 7/20/2010 12:26:01 | 24.5913 |
| 7/19/2010 15:02:01 | 23.926 | 10/27/2010 05:45:00 | 28.5 | 7/20/2010 12:46:01 | 24.5913 |
| 7/19/2010 15:22:01 | 23.926 | 10/27/2010 06:20:00 | 28.5 | 7/20/2010 13:06:01 | 24.5913 |
| 7/19/2010 15:42:01 | 23.926 | 10/27/2010 06:55:00 | 28.5 | 7/20/2010 13:26:01 | 24.5913 |
| 7/19/2010 16:02:01 | 23.989 | 10/27/2010 07:30:00 | 28.0 | 7/20/2010 13:46:01 | 24.5913 |
| 7/19/2010 16:22:01 | 23.989 | 10/27/2010 08:05:00 | 28.0 | 7/20/2010 14:06:01 | 24.5913 |
| 7/19/2010 16:42:01 | 23.989 | 10/27/2010 08:40:00 | 28.0 | 7/20/2010 14:26:01 | 24.5293 |
| 7/19/2010 17:02:01 | 24.051 | 10/27/2010 09:15:00 | 28.0 | 7/20/2010 14:46:01 | 24.5293 |
| 7/19/2010 17:22:01 | 24.051 | 10/27/2010 09:50:00 | 28.0 | 7/20/2010 15:06:01 | 24.5293 |
| 7/19/2010 17:42:01 | 24.114 | 10/27/2010 10:25:00 | 28.0 | 7/20/2010 15:26:01 | 24.5293 |
| 7/19/2010 18:02:01 | 24.114 | 10/27/2010 11:00:00 | 28.0 | 7/20/2010 15:46:01 | 24.5293 |
| 7/19/2010 18:22:01 | 24.176 | 10/27/2010 11:35:00 | 28.0 | 7/20/2010 16:06:01 | 24.5293 |
| 7/19/2010 18:42:01 | 24.176 | 10/27/2010 12:10:00 | 28.0 | 7/20/2010 16:26:01 | 24.5293 |
| 7/19/2010 19:02:01 | 24.176 | 10/27/2010 12:45:00 | 28.0 | 7/20/2010 16:46:01 | 24.5293 |
| 7/19/2010 19:22:01 | 24.239 | 10/27/2010 13:20:00 | 28.0 | 7/20/2010 17:06:01 | 24.5293 |
| 7/19/2010 19:42:01 | 24.239 | 10/27/2010 13:55:00 | 28.0 | 7/20/2010 17:26:01 | 24.5293 |

|                    |        |                     |      |                    |         |
|--------------------|--------|---------------------|------|--------------------|---------|
| 7/19/2010 20:02:01 | 24.301 | 10/27/2010 14:30:00 | 28.5 | 7/20/2010 17:46:01 | 24.5293 |
| 7/19/2010 20:22:01 | 24.301 | 10/27/2010 15:05:00 | 28.5 | 7/20/2010 18:06:01 | 24.5293 |
| 7/19/2010 20:42:01 | 24.301 | 10/27/2010 15:40:00 | 28.5 | 7/20/2010 18:26:01 | 24.5293 |
| 7/19/2010 21:02:01 | 24.301 | 10/27/2010 16:15:00 | 28.5 | 7/20/2010 18:46:01 | 24.5913 |
| 7/19/2010 21:22:01 | 24.364 | 10/27/2010 16:50:00 | 28.5 | 7/20/2010 19:06:01 | 24.5913 |
| 7/19/2010 21:42:01 | 24.364 | 10/27/2010 17:25:00 | 29.0 | 7/20/2010 19:26:01 | 24.5913 |
| 7/19/2010 22:02:01 | 24.364 | 10/27/2010 18:00:00 | 29.0 | 7/20/2010 19:46:01 | 24.5913 |
| 7/19/2010 22:22:01 | 24.364 | 10/27/2010 18:35:00 | 29.0 | 7/20/2010 20:06:01 | 24.5913 |
| 7/19/2010 22:42:01 | 24.364 | 10/27/2010 19:10:00 | 29.0 | 7/20/2010 20:26:01 | 24.5913 |
| 7/19/2010 23:02:01 | 24.364 | 10/27/2010 19:45:00 | 29.0 | 7/20/2010 20:46:01 | 24.5913 |
| 7/19/2010 23:22:01 | 24.364 | 10/27/2010 20:20:00 | 29.0 | 7/20/2010 21:06:01 | 24.6543 |
| 7/19/2010 23:42:01 | 24.364 | 10/27/2010 20:55:00 | 29.0 | 7/20/2010 21:26:01 | 24.6543 |
| 7/20/2010 00:02:01 | 24.364 | 10/27/2010 21:30:00 | 29.0 | 7/20/2010 21:46:01 | 24.6543 |
| 7/20/2010 00:22:01 | 24.364 | 10/27/2010 22:05:00 | 29.0 | 7/20/2010 22:06:01 | 24.6543 |
| 7/20/2010 00:42:01 | 24.364 | 10/27/2010 22:40:00 | 29.0 | 7/20/2010 22:26:01 | 24.6543 |
| 7/20/2010 01:02:01 | 24.364 | 10/27/2010 23:15:00 | 29.0 | 7/20/2010 22:46:01 | 24.6543 |
| 7/20/2010 01:22:01 | 24.364 | 10/27/2010 23:50:00 | 29.0 | 7/20/2010 23:06:01 | 24.7173 |
| 7/20/2010 01:42:01 | 24.364 | 10/28/2010 00:25:00 | 29.0 | 7/20/2010 23:26:01 | 24.7173 |
| 7/20/2010 02:02:01 | 24.364 | 10/28/2010 01:00:00 | 29.0 | 7/20/2010 23:46:01 | 24.7173 |
| 7/20/2010 02:22:01 | 24.364 | 10/28/2010 01:35:00 | 29.0 | 7/21/2010 00:06:01 | 24.7173 |
| 7/20/2010 02:42:01 | 24.301 | 10/28/2010 02:10:00 | 29.0 | 7/21/2010 00:26:01 | 24.7173 |
| 7/20/2010 03:02:01 | 24.301 | 10/28/2010 02:45:00 | 29.0 | 7/21/2010 00:46:01 | 24.7173 |
| 7/20/2010 03:22:01 | 24.301 | 10/28/2010 03:20:00 | 29.0 | 7/21/2010 01:06:01 | 24.7793 |
| 7/20/2010 03:42:01 | 24.301 | 10/28/2010 03:55:00 | 29.0 | 7/21/2010 01:26:01 | 24.7793 |
| 7/20/2010 04:02:01 | 24.239 | 10/28/2010 04:30:00 | 29.0 | 7/21/2010 01:46:01 | 24.7793 |
| 7/20/2010 04:22:01 | 24.239 | 10/28/2010 05:05:00 | 28.5 | 7/21/2010 02:06:01 | 24.7793 |
| 7/20/2010 04:42:01 | 24.239 | 10/28/2010 05:40:00 | 28.5 | 7/21/2010 02:26:01 | 24.7793 |
| 7/20/2010 05:02:01 | 24.239 | 10/28/2010 06:15:00 | 28.5 | 7/21/2010 02:46:01 | 24.7793 |
| 7/20/2010 05:22:01 | 24.176 | 10/28/2010 06:50:00 | 28.5 | 7/21/2010 03:06:01 | 24.7793 |
| 7/20/2010 05:42:01 | 24.176 | 10/28/2010 07:25:00 | 28.5 | 7/21/2010 03:26:01 | 24.7793 |
| 7/20/2010 06:02:01 | 24.176 | 10/28/2010 08:00:00 | 28.5 | 7/21/2010 03:46:01 | 24.7793 |
| 7/20/2010 06:22:01 | 24.114 | 10/28/2010 08:35:00 | 28.5 | 7/21/2010 04:06:01 | 24.7793 |
| 7/20/2010 06:42:01 | 24.114 | 10/28/2010 09:10:00 | 28.5 | 7/21/2010 04:26:01 | 24.7793 |
| 7/20/2010 07:02:01 | 24.114 | 10/28/2010 09:45:00 | 28.5 | 7/21/2010 04:46:01 | 24.7793 |
| 7/20/2010 07:22:01 | 24.051 | 10/28/2010 10:20:00 | 28.5 | 7/21/2010 05:06:01 | 24.7793 |
| 7/20/2010 07:42:01 | 24.051 | 10/28/2010 10:55:00 | 28.5 | 7/21/2010 05:26:01 | 24.7793 |
| 7/20/2010 08:02:01 | 24.051 | 10/28/2010 11:30:00 | 28.5 | 7/21/2010 05:46:01 | 24.7793 |
| 7/20/2010 08:22:01 | 23.989 | 10/28/2010 12:05:00 | 28.5 | 7/21/2010 06:06:01 | 24.7793 |
| 7/20/2010 08:42:01 | 23.989 | 10/28/2010 12:40:00 | 28.5 | 7/21/2010 06:26:01 | 24.7793 |
| 7/20/2010 09:02:01 | 23.989 | 10/28/2010 13:15:00 | 28.5 | 7/21/2010 06:46:01 | 24.7793 |
| 7/20/2010 09:22:01 | 23.989 | 10/28/2010 13:50:00 | 28.5 | 7/21/2010 07:06:01 | 24.7793 |
| 7/20/2010 09:42:01 | 23.926 | 10/28/2010 14:25:00 | 29.0 | 7/21/2010 07:26:01 | 24.7793 |
| 7/20/2010 10:02:01 | 23.926 | 10/28/2010 15:00:00 | 29.0 | 7/21/2010 07:46:01 | 24.7793 |
| 7/20/2010 10:22:01 | 23.926 | 10/28/2010 15:35:00 | 29.0 | 7/21/2010 08:06:01 | 24.7793 |
| 7/20/2010 10:42:01 | 23.864 | 10/28/2010 16:10:00 | 29.0 | 7/21/2010 08:26:01 | 24.7793 |
| 7/20/2010 11:02:01 | 23.864 | 10/28/2010 16:45:00 | 29.0 | 7/21/2010 08:46:01 | 24.7173 |
| 7/20/2010 11:22:01 | 23.864 | 10/28/2010 17:20:00 | 29.0 | 7/21/2010 09:06:01 | 24.7173 |
| 7/20/2010 11:42:01 | 23.864 | 10/28/2010 17:55:00 | 29.0 | 7/21/2010 09:26:01 | 24.7173 |
| 7/20/2010 12:02:01 | 23.801 | 10/28/2010 18:30:00 | 29.5 | 7/21/2010 09:46:01 | 24.7173 |
| 7/20/2010 12:22:01 | 23.801 | 10/28/2010 19:05:00 | 29.5 | 7/21/2010 10:06:01 | 24.7173 |

|                    |        |                     |      |                    |         |
|--------------------|--------|---------------------|------|--------------------|---------|
| 7/20/2010 12:42:01 | 23.801 | 10/28/2010 19:40:00 | 29.5 | 7/21/2010 10:26:01 | 24.7173 |
| 7/20/2010 13:02:01 | 23.801 | 10/28/2010 20:15:00 | 29.5 | 7/21/2010 10:46:01 | 24.6543 |
| 7/20/2010 13:22:01 | 23.801 | 10/28/2010 20:50:00 | 29.5 | 7/21/2010 11:06:01 | 24.6543 |
| 7/20/2010 13:42:01 | 23.801 | 10/28/2010 21:25:00 | 29.5 | 7/21/2010 11:26:01 | 24.6543 |
| 7/20/2010 14:02:01 | 23.801 | 10/28/2010 22:00:00 | 29.5 | 7/21/2010 11:46:01 | 24.6543 |
| 7/20/2010 14:22:01 | 23.801 | 10/28/2010 22:35:00 | 29.5 | 7/21/2010 12:06:01 | 24.6543 |
| 7/20/2010 14:42:01 | 23.801 | 10/28/2010 23:10:00 | 29.5 | 7/21/2010 12:26:01 | 24.6543 |
| 7/20/2010 15:02:01 | 23.864 | 10/28/2010 23:45:00 | 29.0 | 7/21/2010 12:46:01 | 24.5913 |
| 7/20/2010 15:22:01 | 23.864 | 10/29/2010 00:20:00 | 29.0 | 7/21/2010 13:06:01 | 24.5913 |
| 7/20/2010 15:42:01 | 23.864 | 10/29/2010 00:55:00 | 29.0 | 7/21/2010 13:26:01 | 24.5913 |
| 7/20/2010 16:02:01 | 23.864 | 10/29/2010 01:30:00 | 29.0 | 7/21/2010 13:46:01 | 24.5913 |
| 7/20/2010 16:22:01 | 23.926 | 10/29/2010 02:05:00 | 29.0 | 7/21/2010 14:06:01 | 24.5913 |
| 7/20/2010 16:42:01 | 23.926 | 10/29/2010 02:40:00 | 29.0 | 7/21/2010 14:26:01 | 24.5293 |
| 7/20/2010 17:02:01 | 23.989 | 10/29/2010 03:15:00 | 29.5 | 7/21/2010 14:46:01 | 24.5293 |
| 7/20/2010 17:22:01 | 23.989 | 10/29/2010 03:50:00 | 29.5 | 7/21/2010 15:06:01 | 24.5293 |
| 7/20/2010 17:42:01 | 24.051 | 10/29/2010 04:25:00 | 29.5 | 7/21/2010 15:26:01 | 24.5293 |
| 7/20/2010 18:02:01 | 24.051 | 10/29/2010 05:00:00 | 29.5 | 7/21/2010 15:46:01 | 24.5293 |
| 7/20/2010 18:22:01 | 24.114 | 10/29/2010 05:35:00 | 29.0 | 7/21/2010 16:06:01 | 24.5293 |
| 7/20/2010 18:42:01 | 24.114 | 10/29/2010 06:10:00 | 29.0 | 7/21/2010 16:26:01 | 24.5293 |
| 7/20/2010 19:02:01 | 24.176 | 10/29/2010 06:45:00 | 29.0 | 7/21/2010 16:46:01 | 24.5293 |
| 7/20/2010 19:22:01 | 24.176 | 10/29/2010 07:20:00 | 29.0 | 7/21/2010 17:06:01 | 24.5293 |
| 7/20/2010 19:42:01 | 24.239 | 10/29/2010 07:55:00 | 29.0 | 7/21/2010 17:26:01 | 24.5293 |
| 7/20/2010 20:02:01 | 24.239 | 10/29/2010 08:30:00 | 29.0 | 7/21/2010 17:46:01 | 24.5293 |
| 7/20/2010 20:22:01 | 24.239 | 10/29/2010 09:05:00 | 28.5 | 7/21/2010 18:06:01 | 24.5293 |
| 7/20/2010 20:42:01 | 24.301 | 10/29/2010 09:40:00 | 29.0 | 7/21/2010 18:26:01 | 24.5293 |
| 7/20/2010 21:02:01 | 24.301 | 10/29/2010 10:15:00 | 28.5 | 7/21/2010 18:46:01 | 24.5293 |
| 7/20/2010 21:22:01 | 24.301 | 10/29/2010 10:50:00 | 28.5 | 7/21/2010 19:06:01 | 24.5293 |
| 7/20/2010 21:42:01 | 24.301 | 10/29/2010 11:25:00 | 28.5 | 7/21/2010 19:26:01 | 24.5293 |
| 7/20/2010 22:02:01 | 24.364 | 10/29/2010 12:00:00 | 29.0 | 7/21/2010 19:46:01 | 24.5293 |
| 7/20/2010 22:22:01 | 24.364 | 10/29/2010 12:35:00 | 29.0 | 7/21/2010 20:06:01 | 24.5913 |
| 7/20/2010 22:42:01 | 24.364 | 10/29/2010 13:10:00 | 29.0 | 7/21/2010 20:26:01 | 24.5913 |
| 7/20/2010 23:02:01 | 24.364 | 10/29/2010 13:45:00 | 29.0 | 7/21/2010 20:46:01 | 24.5913 |
| 7/20/2010 23:22:01 | 24.364 | 10/29/2010 14:20:00 | 29.0 | 7/21/2010 21:06:01 | 24.5913 |
| 7/20/2010 23:42:01 | 24.364 | 10/29/2010 14:55:00 | 29.0 | 7/21/2010 21:26:01 | 24.5913 |
| 7/21/2010 00:02:01 | 24.364 | 10/29/2010 15:30:00 | 29.0 | 7/21/2010 21:46:01 | 24.5913 |
| 7/21/2010 00:22:01 | 24.364 | 10/29/2010 16:05:00 | 29.5 | 7/21/2010 22:06:01 | 24.6543 |
| 7/21/2010 00:42:01 | 24.364 | 10/29/2010 16:40:00 | 29.5 | 7/21/2010 22:26:01 | 24.6543 |
| 7/21/2010 01:02:01 | 24.364 | 10/29/2010 17:15:00 | 29.5 | 7/21/2010 22:46:01 | 24.6543 |
| 7/21/2010 01:22:01 | 24.364 | 10/29/2010 17:50:00 | 29.5 | 7/21/2010 23:06:01 | 24.6543 |
| 7/21/2010 01:42:01 | 24.364 | 10/29/2010 18:25:00 | 29.5 | 7/21/2010 23:26:01 | 24.6543 |
| 7/21/2010 02:02:01 | 24.364 | 10/29/2010 19:00:00 | 29.5 | 7/21/2010 23:46:01 | 24.6543 |
| 7/21/2010 02:22:01 | 24.364 | 10/29/2010 19:35:00 | 29.5 | 7/22/2010 00:06:01 | 24.6543 |
| 7/21/2010 02:42:01 | 24.364 | 10/29/2010 20:10:00 | 29.5 | 7/22/2010 00:26:01 | 24.7173 |
| 7/21/2010 03:02:01 | 24.301 | 10/29/2010 20:45:00 | 29.5 | 7/22/2010 00:46:01 | 24.7173 |
| 7/21/2010 03:22:01 | 24.301 | 10/29/2010 21:20:00 | 29.5 | 7/22/2010 01:06:01 | 24.7173 |
| 7/21/2010 03:42:01 | 24.301 | 10/29/2010 21:55:00 | 30.0 | 7/22/2010 01:26:01 | 24.7173 |
| 7/21/2010 04:02:01 | 24.301 | 10/29/2010 22:30:00 | 30.0 | 7/22/2010 01:46:01 | 24.7173 |
| 7/21/2010 04:22:01 | 24.301 | 10/29/2010 23:05:00 | 30.0 | 7/22/2010 02:06:01 | 24.7173 |
| 7/21/2010 04:42:01 | 24.301 | 10/29/2010 23:40:00 | 29.5 | 7/22/2010 02:26:01 | 24.7173 |
| 7/21/2010 05:02:01 | 24.239 | 10/30/2010 00:15:00 | 29.5 | 7/22/2010 02:46:01 | 24.7173 |

|                    |        |                     |      |                    |         |
|--------------------|--------|---------------------|------|--------------------|---------|
| 7/21/2010 05:22:01 | 24.239 | 10/30/2010 00:50:00 | 29.5 | 7/22/2010 03:06:01 | 24.7173 |
| 7/21/2010 05:42:01 | 24.239 | 10/30/2010 01:25:00 | 29.5 | 7/22/2010 03:26:01 | 24.7173 |
| 7/21/2010 06:02:01 | 24.239 | 10/30/2010 02:00:00 | 29.5 | 7/22/2010 03:46:01 | 24.7173 |
| 7/21/2010 06:22:01 | 24.176 | 10/30/2010 02:35:00 | 29.5 | 7/22/2010 04:06:01 | 24.7173 |
| 7/21/2010 06:42:01 | 24.176 | 10/30/2010 03:10:00 | 29.5 | 7/22/2010 04:26:01 | 24.7173 |
| 7/21/2010 07:02:01 | 24.176 | 10/30/2010 03:45:00 | 29.5 | 7/22/2010 04:46:01 | 24.7173 |
| 7/21/2010 07:22:01 | 24.114 | 10/30/2010 04:20:00 | 29.5 | 7/22/2010 05:06:01 | 24.7173 |
| 7/21/2010 07:42:01 | 24.114 | 10/30/2010 04:55:00 | 29.5 | 7/22/2010 05:26:01 | 24.7173 |
| 7/21/2010 08:02:01 | 24.114 | 10/30/2010 05:30:00 | 29.5 | 7/22/2010 05:46:01 | 24.7173 |
| 7/21/2010 08:22:01 | 24.051 | 10/30/2010 06:05:00 | 29.0 | 7/22/2010 06:06:01 | 24.7173 |
| 7/21/2010 08:42:01 | 24.051 | 10/30/2010 06:40:00 | 29.0 | 7/22/2010 06:26:01 | 24.7173 |
| 7/21/2010 09:02:01 | 24.051 | 10/30/2010 07:15:00 | 29.0 | 7/22/2010 06:46:01 | 24.7173 |
| 7/21/2010 09:22:01 | 23.989 | 10/30/2010 07:50:00 | 29.0 | 7/22/2010 07:06:01 | 24.7173 |
| 7/21/2010 09:42:01 | 23.989 | 10/30/2010 08:25:00 | 29.0 | 7/22/2010 07:26:01 | 24.6543 |
| 7/21/2010 10:02:01 | 23.989 | 10/30/2010 09:00:00 | 29.0 | 7/22/2010 07:46:01 | 24.6543 |
| 7/21/2010 10:22:01 | 23.926 | 10/30/2010 09:35:00 | 29.0 | 7/22/2010 08:06:01 | 24.6543 |
| 7/21/2010 10:42:01 | 23.926 | 10/30/2010 10:10:00 | 29.0 | 7/22/2010 08:26:01 | 24.6543 |
| 7/21/2010 11:02:01 | 23.864 | 10/30/2010 10:45:00 | 29.0 | 7/22/2010 08:46:01 | 24.6543 |
| 7/21/2010 11:22:01 | 23.864 | 10/30/2010 11:20:00 | 29.0 | 7/22/2010 09:06:01 | 24.6543 |
| 7/21/2010 11:42:01 | 23.864 | 10/30/2010 11:55:00 | 29.0 | 7/22/2010 09:26:01 | 24.6543 |
| 7/21/2010 12:02:01 | 23.801 | 10/30/2010 12:30:00 | 29.0 | 7/22/2010 09:46:01 | 24.5913 |
| 7/21/2010 12:22:01 | 23.801 | 10/30/2010 13:05:00 | 29.0 | 7/22/2010 10:06:01 | 24.5913 |
| 7/21/2010 12:42:01 | 23.801 | 10/30/2010 13:40:00 | 29.0 | 7/22/2010 10:26:01 | 24.5913 |
| 7/21/2010 13:02:01 | 23.801 | 10/30/2010 14:15:00 | 29.0 | 7/22/2010 10:46:01 | 24.5913 |
| 7/21/2010 13:22:01 | 23.801 | 10/30/2010 14:50:00 | 29.5 | 7/22/2010 11:06:01 | 24.5913 |
| 7/21/2010 13:42:01 | 23.801 | 10/30/2010 15:25:00 | 29.5 | 7/22/2010 11:26:01 | 24.5293 |
| 7/21/2010 14:02:01 | 23.801 | 10/30/2010 16:00:00 | 29.5 | 7/22/2010 11:46:01 | 24.5293 |
| 7/21/2010 14:22:01 | 23.801 | 10/30/2010 16:35:00 | 29.5 | 7/22/2010 12:06:01 | 24.5293 |
| 7/21/2010 14:42:01 | 23.801 | 10/30/2010 17:10:00 | 29.5 | 7/22/2010 12:26:01 | 24.5293 |
| 7/21/2010 15:02:01 | 23.801 | 10/30/2010 17:45:00 | 29.5 | 7/22/2010 12:46:01 | 24.5293 |
| 7/21/2010 15:22:01 | 23.801 | 10/30/2010 18:20:00 | 29.5 | 7/22/2010 13:06:01 | 24.4663 |
| 7/21/2010 15:42:01 | 23.864 | 10/30/2010 18:55:00 | 30.0 | 7/22/2010 13:26:01 | 24.4663 |
| 7/21/2010 16:02:01 | 23.864 | 10/30/2010 19:30:00 | 30.0 | 7/22/2010 13:46:01 | 24.4663 |
| 7/21/2010 16:22:01 | 23.864 | 10/30/2010 20:05:00 | 30.0 | 7/22/2010 14:06:01 | 24.4663 |
| 7/21/2010 16:42:01 | 23.926 | 10/30/2010 20:40:00 | 30.0 | 7/22/2010 14:26:01 | 24.4663 |
| 7/21/2010 17:02:01 | 23.926 | 10/30/2010 21:15:00 | 29.5 | 7/22/2010 14:46:01 | 24.4663 |
| 7/21/2010 17:22:01 | 23.989 | 10/30/2010 21:50:00 | 29.5 | 7/22/2010 15:06:01 | 24.4663 |
| 7/21/2010 17:42:01 | 23.989 | 10/30/2010 22:25:00 | 29.5 | 7/22/2010 15:26:01 | 24.4043 |
| 7/21/2010 18:02:01 | 24.051 | 10/30/2010 23:00:00 | 29.5 | 7/22/2010 15:46:01 | 24.4043 |
| 7/21/2010 18:22:01 | 24.051 | 10/30/2010 23:35:00 | 29.5 | 7/22/2010 16:06:01 | 24.4043 |
| 7/21/2010 18:42:01 | 24.051 | 10/31/2010 00:10:00 | 29.5 | 7/22/2010 16:26:01 | 24.4043 |
| 7/21/2010 19:02:01 | 24.114 | 10/31/2010 00:45:00 | 29.5 | 7/22/2010 16:46:01 | 24.4043 |
| 7/21/2010 19:22:01 | 24.114 | 10/31/2010 01:20:00 | 29.5 | 7/22/2010 17:06:01 | 24.4043 |
| 7/21/2010 19:42:01 | 24.176 | 10/31/2010 01:55:00 | 29.5 | 7/22/2010 17:26:01 | 24.4043 |
| 7/21/2010 20:02:01 | 24.176 | 10/31/2010 02:30:00 | 29.5 | 7/22/2010 17:46:01 | 24.4043 |
| 7/21/2010 20:22:01 | 24.176 | 10/31/2010 03:05:00 | 29.5 | 7/22/2010 18:06:01 | 24.4043 |
| 7/21/2010 20:42:01 | 24.239 | 10/31/2010 03:40:00 | 29.5 | 7/22/2010 18:26:01 | 24.4043 |
| 7/21/2010 21:02:01 | 24.239 | 10/31/2010 04:15:00 | 29.5 | 7/22/2010 18:46:01 | 24.4663 |
| 7/21/2010 21:22:01 | 24.239 | 10/31/2010 04:50:00 | 29.5 | 7/22/2010 19:06:01 | 24.4663 |
| 7/21/2010 21:42:01 | 24.301 | 10/31/2010 05:25:00 | 29.5 | 7/22/2010 19:26:01 | 24.4663 |

|                    |        |                     |      |                    |         |
|--------------------|--------|---------------------|------|--------------------|---------|
| 7/21/2010 22:02:01 | 24.301 | 10/31/2010 06:00:00 | 29.5 | 7/22/2010 19:46:01 | 24.4663 |
| 7/21/2010 22:22:01 | 24.301 | 10/31/2010 06:35:00 | 29.0 | 7/22/2010 20:06:01 | 24.4663 |
| 7/21/2010 22:42:01 | 24.301 | 10/31/2010 07:10:00 | 29.0 | 7/22/2010 20:26:01 | 24.4663 |
| 7/21/2010 23:02:01 | 24.301 | 10/31/2010 07:45:00 | 29.0 | 7/22/2010 20:46:01 | 24.4663 |
| 7/21/2010 23:22:01 | 24.301 | 10/31/2010 08:20:00 | 29.0 | 7/22/2010 21:06:01 | 24.4663 |
| 7/21/2010 23:42:01 | 24.301 | 10/31/2010 08:55:00 | 29.0 | 7/22/2010 21:26:01 | 24.5293 |
| 7/22/2010 00:02:01 | 24.301 | 10/31/2010 09:30:00 | 29.0 | 7/22/2010 21:46:01 | 24.5293 |
| 7/22/2010 00:22:01 | 24.301 | 10/31/2010 10:05:00 | 29.0 | 7/22/2010 22:06:01 | 24.5293 |
| 7/22/2010 00:42:01 | 24.301 | 10/31/2010 10:40:00 | 29.0 | 7/22/2010 22:26:01 | 24.5293 |
| 7/22/2010 01:02:01 | 24.301 | 10/31/2010 11:15:00 | 29.0 | 7/22/2010 22:46:01 | 24.5293 |
| 7/22/2010 01:22:01 | 24.301 | 10/31/2010 11:50:00 | 29.0 | 7/22/2010 23:06:01 | 24.5913 |
| 7/22/2010 01:42:01 | 24.301 | 10/31/2010 12:25:00 | 29.0 | 7/22/2010 23:26:01 | 24.5913 |
| 7/22/2010 02:02:01 | 24.239 | 10/31/2010 13:00:00 | 29.0 | 7/22/2010 23:46:01 | 24.5913 |
| 7/22/2010 02:22:01 | 24.239 | 10/31/2010 13:35:00 | 29.0 | 7/23/2010 00:06:01 | 24.5913 |
| 7/22/2010 02:42:01 | 24.239 | 10/31/2010 14:10:00 | 29.0 | 7/23/2010 00:26:01 | 24.5913 |
| 7/22/2010 03:02:01 | 24.239 | 10/31/2010 14:45:00 | 29.5 | 7/23/2010 00:46:01 | 24.5913 |
| 7/22/2010 03:22:01 | 24.239 | 10/31/2010 15:20:00 | 29.5 | 7/23/2010 01:06:01 | 24.6543 |
| 7/22/2010 03:42:01 | 24.239 | 10/31/2010 15:55:00 | 29.5 | 7/23/2010 01:26:01 | 24.6543 |
| 7/22/2010 04:02:01 | 24.239 | 10/31/2010 16:30:00 | 29.5 | 7/23/2010 01:46:01 | 24.6543 |
| 7/22/2010 04:22:01 | 24.176 | 10/31/2010 17:05:00 | 29.5 | 7/23/2010 02:06:01 | 24.6543 |
| 7/22/2010 04:42:01 | 24.176 | 10/31/2010 17:40:00 | 29.5 | 7/23/2010 02:26:01 | 24.6543 |
| 7/22/2010 05:02:01 | 24.176 | 10/31/2010 18:15:00 | 29.5 | 7/23/2010 02:46:01 | 24.6543 |
| 7/22/2010 05:22:01 | 24.176 | 10/31/2010 18:50:00 | 29.5 | 7/23/2010 03:06:01 | 24.6543 |
| 7/22/2010 05:42:01 | 24.114 | 10/31/2010 19:25:00 | 30.0 | 7/23/2010 03:26:01 | 24.6543 |
| 7/22/2010 06:02:01 | 24.114 | 10/31/2010 20:00:00 | 29.5 | 7/23/2010 03:46:01 | 24.6543 |
| 7/22/2010 06:22:01 | 24.114 | 10/31/2010 20:35:00 | 29.5 | 7/23/2010 04:06:01 | 24.6543 |
| 7/22/2010 06:42:01 | 24.051 | 10/31/2010 21:10:00 | 30.0 | 7/23/2010 04:26:01 | 24.6543 |
| 7/22/2010 07:02:01 | 24.051 | 10/31/2010 21:45:00 | 30.0 | 7/23/2010 04:46:01 | 24.6543 |
| 7/22/2010 07:22:01 | 24.051 | 10/31/2010 22:20:00 | 30.0 | 7/23/2010 05:06:01 | 24.7173 |
| 7/22/2010 07:42:01 | 23.989 | 10/31/2010 22:55:00 | 30.0 | 7/23/2010 05:26:01 | 24.7173 |
| 7/22/2010 08:02:01 | 23.989 | 10/31/2010 23:30:00 | 30.0 | 7/23/2010 05:46:01 | 24.7173 |
| 7/22/2010 08:22:01 | 23.989 | 11/1/2010 00:05:00  | 30.5 | 7/23/2010 06:06:01 | 24.7173 |
| 7/22/2010 08:42:01 | 23.926 | 11/1/2010 00:40:00  | 30.0 | 7/23/2010 06:26:01 | 24.7173 |
| 7/22/2010 09:02:01 | 23.926 | 11/1/2010 01:15:00  | 30.0 | 7/23/2010 06:46:01 | 24.7173 |
| 7/22/2010 09:22:01 | 23.926 | 11/1/2010 01:50:00  | 30.0 | 7/23/2010 07:06:01 | 24.7173 |
| 7/22/2010 09:42:01 | 23.864 | 11/1/2010 02:25:00  | 30.0 | 7/23/2010 07:26:01 | 24.6543 |
| 7/22/2010 10:02:01 | 23.864 | 11/1/2010 03:00:00  | 29.5 | 7/23/2010 07:46:01 | 24.6543 |
| 7/22/2010 10:22:01 | 23.864 | 11/1/2010 03:35:00  | 29.5 | 7/23/2010 08:06:01 | 24.6543 |
| 7/22/2010 10:42:01 | 23.801 | 11/1/2010 04:10:00  | 29.5 | 7/23/2010 08:26:01 | 24.6543 |
| 7/22/2010 11:02:01 | 23.801 | 11/1/2010 04:45:00  | 29.5 | 7/23/2010 08:46:01 | 24.6543 |
| 7/22/2010 11:22:01 | 23.739 | 11/1/2010 05:20:00  | 29.5 | 7/23/2010 09:06:01 | 24.6543 |
| 7/22/2010 11:42:01 | 23.739 | 11/1/2010 05:55:00  | 29.5 | 7/23/2010 09:26:01 | 24.6543 |
| 7/22/2010 12:02:01 | 23.739 | 11/1/2010 06:30:00  | 29.0 | 7/23/2010 09:46:01 | 24.6543 |
| 7/22/2010 12:22:01 | 23.739 | 11/1/2010 07:05:00  | 29.0 | 7/23/2010 10:06:01 | 24.6543 |
| 7/22/2010 12:42:01 | 23.676 | 11/1/2010 07:40:00  | 29.0 | 7/23/2010 10:26:01 | 24.6543 |
| 7/22/2010 13:02:01 | 23.676 | 11/1/2010 08:15:00  | 29.0 | 7/23/2010 10:46:01 | 24.6543 |
| 7/22/2010 13:22:01 | 23.676 | 11/1/2010 08:50:00  | 29.0 | 7/23/2010 11:06:01 | 24.6543 |
| 7/22/2010 13:42:01 | 23.676 | 11/1/2010 09:25:00  | 29.0 | 7/23/2010 11:26:01 | 24.6543 |
| 7/22/2010 14:02:01 | 23.676 | 11/1/2010 10:00:00  | 29.0 | 7/23/2010 11:46:01 | 24.6543 |
| 7/22/2010 14:22:01 | 23.676 | 11/1/2010 10:35:00  | 29.0 | 7/23/2010 12:06:01 | 24.6543 |



|                    |        |                    |      |                    |         |
|--------------------|--------|--------------------|------|--------------------|---------|
| 7/22/2010 14:42:01 | 23.676 | 11/1/2010 11:10:00 | 29.0 | 7/23/2010 12:26:01 | 24.5913 |
| 7/22/2010 15:02:01 | 23.739 | 11/1/2010 11:45:00 | 29.0 | 7/23/2010 12:46:01 | 24.5913 |
| 7/22/2010 15:22:01 | 23.739 | 11/1/2010 12:20:00 | 29.0 | 7/23/2010 13:06:01 | 24.5913 |
| 7/22/2010 15:42:01 | 23.739 | 11/1/2010 12:55:00 | 29.0 | 7/23/2010 13:26:01 | 24.5913 |
| 7/22/2010 16:02:01 | 23.801 | 11/1/2010 13:30:00 | 29.0 | 7/23/2010 13:46:01 | 24.5913 |
| 7/22/2010 16:22:01 | 23.801 | 11/1/2010 14:05:00 | 29.0 | 7/23/2010 14:06:01 | 24.5913 |
| 7/22/2010 16:42:01 | 23.801 | 11/1/2010 14:40:00 | 29.5 | 7/23/2010 14:26:01 | 24.5913 |
| 7/22/2010 17:02:01 | 23.864 | 11/1/2010 15:15:00 | 29.5 | 7/23/2010 14:46:01 | 24.5913 |
| 7/22/2010 17:22:01 | 23.864 | 11/1/2010 15:50:00 | 29.5 | 7/23/2010 15:06:01 | 24.5913 |
| 7/22/2010 17:42:01 | 23.926 | 11/1/2010 16:25:00 | 29.5 | 7/23/2010 15:26:01 | 24.5913 |
| 7/22/2010 18:02:01 | 23.926 | 11/1/2010 17:00:00 | 29.5 | 7/23/2010 15:46:01 | 24.5913 |
| 7/22/2010 18:22:01 | 23.989 | 11/1/2010 17:35:00 | 29.5 | 7/23/2010 16:06:01 | 24.5913 |
| 7/22/2010 18:42:01 | 23.989 | 11/1/2010 18:10:00 | 29.5 | 7/23/2010 16:26:01 | 24.5913 |
| 7/22/2010 19:02:01 | 24.051 | 11/1/2010 18:45:00 | 29.5 | 7/23/2010 16:46:01 | 24.5913 |
| 7/22/2010 19:22:01 | 24.051 | 11/1/2010 19:20:00 | 30.0 | 7/23/2010 17:06:01 | 24.5913 |
| 7/22/2010 19:42:01 | 24.114 | 11/1/2010 19:55:00 | 29.5 | 7/23/2010 17:26:01 | 24.5913 |
| 7/22/2010 20:02:01 | 24.114 | 11/1/2010 20:30:00 | 29.5 | 7/23/2010 17:46:01 | 24.5913 |
| 7/22/2010 20:22:01 | 24.176 | 11/1/2010 21:05:00 | 29.5 | 7/23/2010 18:06:01 | 24.5913 |
| 7/22/2010 20:42:01 | 24.176 | 11/1/2010 21:40:00 | 29.5 | 7/23/2010 18:26:01 | 24.5913 |
| 7/22/2010 21:02:01 | 24.176 | 11/1/2010 22:15:00 | 29.5 | 7/23/2010 18:46:01 | 24.5913 |
| 7/22/2010 21:22:01 | 24.239 | 11/1/2010 22:50:00 | 29.5 | 7/23/2010 19:06:01 | 24.5913 |
| 7/22/2010 21:42:01 | 24.239 | 11/1/2010 23:25:00 | 29.5 | 7/23/2010 19:26:01 | 24.5913 |
| 7/22/2010 22:02:01 | 24.239 | 11/2/2010 00:00:00 | 29.5 | 7/23/2010 19:46:01 | 24.6543 |
| 7/22/2010 22:22:01 | 24.239 | 11/2/2010 00:35:00 | 29.5 | 7/23/2010 20:06:01 | 24.6543 |
| 7/22/2010 22:42:01 | 24.301 | 11/2/2010 01:10:00 | 29.5 | 7/23/2010 20:26:01 | 24.6543 |
| 7/22/2010 23:02:01 | 24.301 | 11/2/2010 01:45:00 | 29.5 | 7/23/2010 20:46:01 | 24.6543 |
| 7/22/2010 23:22:01 | 24.301 | 11/2/2010 02:20:00 | 29.5 | 7/23/2010 21:06:01 | 24.6543 |
| 7/22/2010 23:42:01 | 24.301 | 11/2/2010 02:55:00 | 29.5 | 7/23/2010 21:26:01 | 24.7173 |
| 7/23/2010 00:02:01 | 24.301 | 11/2/2010 03:30:00 | 29.5 | 7/23/2010 21:46:01 | 24.7173 |
| 7/23/2010 00:22:01 | 24.301 | 11/2/2010 04:05:00 | 29.0 | 7/23/2010 22:06:01 | 24.7173 |
| 7/23/2010 00:42:01 | 24.301 | 11/2/2010 04:40:00 | 29.0 | 7/23/2010 22:26:01 | 24.7173 |
| 7/23/2010 01:02:01 | 24.301 | 11/2/2010 05:15:00 | 29.0 | 7/23/2010 22:46:01 | 24.7173 |
| 7/23/2010 01:22:01 | 24.301 | 11/2/2010 05:50:00 | 29.0 | 7/23/2010 23:06:01 | 24.7173 |
| 7/23/2010 01:42:01 | 24.301 | 11/2/2010 06:25:00 | 29.0 | 7/23/2010 23:26:01 | 24.7173 |
| 7/23/2010 02:02:01 | 24.301 | 11/2/2010 07:00:00 | 29.0 | 7/23/2010 23:46:01 | 24.7173 |
| 7/23/2010 02:22:01 | 24.301 | 11/2/2010 07:35:00 | 29.0 | 7/24/2010 00:06:01 | 24.7173 |
| 7/23/2010 02:42:01 | 24.364 | 11/2/2010 08:10:00 | 29.0 | 7/24/2010 00:26:01 | 24.7793 |
| 7/23/2010 03:02:01 | 24.301 | 11/2/2010 08:45:00 | 29.0 | 7/24/2010 00:46:01 | 24.7793 |
| 7/23/2010 03:22:01 | 24.301 | 11/2/2010 09:20:00 | 29.0 | 7/24/2010 01:06:01 | 24.7793 |
| 7/23/2010 03:42:01 | 24.301 | 11/2/2010 09:55:00 | 29.0 | 7/24/2010 01:26:01 | 24.7793 |
| 7/23/2010 04:02:01 | 24.301 | 11/2/2010 10:30:00 | 29.0 | 7/24/2010 01:46:01 | 24.7793 |
| 7/23/2010 04:22:01 | 24.301 | 11/2/2010 11:05:00 | 29.0 | 7/24/2010 02:06:01 | 24.7793 |
| 7/23/2010 04:42:01 | 24.301 | 11/2/2010 11:40:00 | 29.0 | 7/24/2010 02:26:01 | 24.7793 |
| 7/23/2010 05:02:01 | 24.301 | 11/2/2010 12:15:00 | 29.0 | 7/24/2010 02:46:01 | 24.7793 |
| 7/23/2010 05:22:01 | 24.301 | 11/2/2010 12:50:00 | 29.0 | 7/24/2010 03:06:01 | 24.7793 |
| 7/23/2010 05:42:01 | 24.301 | 11/2/2010 13:25:00 | 29.0 | 7/24/2010 03:26:01 | 24.7793 |
| 7/23/2010 06:02:01 | 24.239 | 11/2/2010 14:00:00 | 29.0 | 7/24/2010 03:46:01 | 24.7793 |
| 7/23/2010 06:22:01 | 24.239 | 11/2/2010 14:35:00 | 29.0 | 7/24/2010 04:06:01 | 24.7793 |
| 7/23/2010 06:42:01 | 24.239 | 11/2/2010 15:10:00 | 29.5 | 7/24/2010 04:26:01 | 24.7793 |
| 7/23/2010 07:02:01 | 24.239 | 11/2/2010 15:45:00 | 29.5 | 7/24/2010 04:46:01 | 24.7793 |

|                    |        |                    |      |                    |         |
|--------------------|--------|--------------------|------|--------------------|---------|
| 7/23/2010 07:22:01 | 24.239 | 11/2/2010 16:20:00 | 29.5 | 7/24/2010 05:06:01 | 24.7793 |
| 7/23/2010 07:42:01 | 24.239 | 11/2/2010 16:55:00 | 29.5 | 7/24/2010 05:26:01 | 24.7793 |
| 7/23/2010 08:02:01 | 24.176 | 11/2/2010 17:30:00 | 29.5 | 7/24/2010 05:46:01 | 24.7793 |
| 7/23/2010 08:22:01 | 24.176 | 11/2/2010 18:05:00 | 29.5 | 7/24/2010 06:06:01 | 24.7793 |
| 7/23/2010 08:42:01 | 24.176 | 11/2/2010 18:40:00 | 29.5 | 7/24/2010 06:26:01 | 24.7793 |
| 7/23/2010 09:02:01 | 24.176 | 11/2/2010 19:15:00 | 29.5 | 7/24/2010 06:46:01 | 24.7793 |
| 7/23/2010 09:22:01 | 24.114 | 11/2/2010 19:50:00 | 29.5 | 7/24/2010 07:06:01 | 24.7793 |
| 7/23/2010 09:42:01 | 24.114 | 11/2/2010 20:25:00 | 29.5 | 7/24/2010 07:26:01 | 24.7173 |
| 7/23/2010 10:02:01 | 24.114 | 11/2/2010 21:00:00 | 29.5 | 7/24/2010 07:46:01 | 24.7173 |
| 7/23/2010 10:22:01 | 24.114 | 11/2/2010 21:35:00 | 29.5 | 7/24/2010 08:06:01 | 24.7173 |
| 7/23/2010 10:42:01 | 24.114 | 11/2/2010 22:10:00 | 29.5 | 7/24/2010 08:26:01 | 24.7173 |
| 7/23/2010 11:02:01 | 24.114 | 11/2/2010 22:45:00 | 29.5 | 7/24/2010 08:46:01 | 24.7173 |
| 7/23/2010 11:22:01 | 24.051 | 11/2/2010 23:20:00 | 29.5 | 7/24/2010 09:06:01 | 24.7173 |
| 7/23/2010 11:42:01 | 24.051 | 11/2/2010 23:55:00 | 29.5 | 7/24/2010 09:26:01 | 24.7173 |
| 7/23/2010 12:02:01 | 24.051 | 11/3/2010 00:30:00 | 29.5 | 7/24/2010 09:46:01 | 24.7173 |
| 7/23/2010 12:22:01 | 24.051 | 11/3/2010 01:05:00 | 29.0 | 7/24/2010 10:06:01 | 24.6543 |
| 7/23/2010 12:42:01 | 24.051 | 11/3/2010 01:40:00 | 29.0 | 7/24/2010 10:26:01 | 24.6543 |
| 7/23/2010 13:02:01 | 24.051 | 11/3/2010 02:15:00 | 29.0 | 7/24/2010 10:46:01 | 24.6543 |
| 7/23/2010 13:22:01 | 24.051 | 11/3/2010 02:50:00 | 29.0 | 7/24/2010 11:06:01 | 24.6543 |
| 7/23/2010 13:42:01 | 24.051 | 11/3/2010 03:25:00 | 29.0 | 7/24/2010 11:26:01 | 24.6543 |
| 7/23/2010 14:02:01 | 24.051 | 11/3/2010 04:00:00 | 29.0 | 7/24/2010 11:46:01 | 24.5913 |
| 7/23/2010 14:22:01 | 24.051 | 11/3/2010 04:35:00 | 29.0 | 7/24/2010 12:06:01 | 24.5913 |
| 7/23/2010 14:42:01 | 24.051 | 11/3/2010 05:10:00 | 29.0 | 7/24/2010 12:26:01 | 24.5913 |
| 7/23/2010 15:02:01 | 24.051 | 11/3/2010 05:45:00 | 29.0 | 7/24/2010 12:46:01 | 24.5913 |
| 7/23/2010 15:22:01 | 24.051 | 11/3/2010 06:20:00 | 29.0 | 7/24/2010 13:06:01 | 24.5913 |
| 7/23/2010 15:42:01 | 24.114 | 11/3/2010 06:55:00 | 29.0 | 7/24/2010 13:26:01 | 24.5913 |
| 7/23/2010 16:02:01 | 24.114 | 11/3/2010 07:30:00 | 29.0 | 7/24/2010 13:46:01 | 24.5293 |
| 7/23/2010 16:22:01 | 24.176 | 11/3/2010 08:05:00 | 29.0 | 7/24/2010 14:06:01 | 24.5293 |
| 7/23/2010 16:42:01 | 24.176 | 11/3/2010 08:40:00 | 29.0 | 7/24/2010 14:26:01 | 24.5293 |
| 7/23/2010 17:02:01 | 24.239 | 11/3/2010 09:15:00 | 29.0 | 7/24/2010 14:46:01 | 24.5293 |
| 7/23/2010 17:22:01 | 24.239 | 11/3/2010 09:50:00 | 29.0 | 7/24/2010 15:06:01 | 24.5293 |
| 7/23/2010 17:42:01 | 24.239 | 11/3/2010 10:25:00 | 29.0 | 7/24/2010 15:26:01 | 24.5293 |
| 7/23/2010 18:02:01 | 24.301 | 11/3/2010 11:00:00 | 29.0 | 7/24/2010 15:46:01 | 24.5293 |
| 7/23/2010 18:22:01 | 24.301 | 11/3/2010 11:35:00 | 29.0 | 7/24/2010 16:06:01 | 24.5293 |
| 7/23/2010 18:42:01 | 24.364 | 11/3/2010 12:10:00 | 29.0 | 7/24/2010 16:26:01 | 24.5293 |
| 7/23/2010 19:02:01 | 24.364 | 11/3/2010 12:45:00 | 29.0 | 7/24/2010 16:46:01 | 24.5293 |
| 7/23/2010 19:22:01 | 24.426 | 11/3/2010 13:20:00 | 29.0 | 7/24/2010 17:06:01 | 24.5293 |
| 7/23/2010 19:42:01 | 24.426 | 11/3/2010 13:55:00 | 29.0 | 7/24/2010 17:26:01 | 24.5293 |
| 7/23/2010 20:02:01 | 24.426 | 11/3/2010 14:30:00 | 29.0 | 7/24/2010 17:46:01 | 24.5293 |
| 7/23/2010 20:22:01 | 24.489 | 11/3/2010 15:05:00 | 29.5 | 7/24/2010 18:06:01 | 24.5293 |
| 7/23/2010 20:42:01 | 24.489 | 11/3/2010 15:40:00 | 29.5 | 7/24/2010 18:26:01 | 24.5293 |
| 7/23/2010 21:02:01 | 24.489 | 11/3/2010 16:15:00 | 30.0 | 7/24/2010 18:46:01 | 24.5293 |
| 7/23/2010 21:22:01 | 24.489 | 11/3/2010 16:50:00 | 30.0 | 7/24/2010 19:06:01 | 24.5293 |
| 7/23/2010 21:42:01 | 24.489 | 11/3/2010 17:25:00 | 30.0 | 7/24/2010 19:26:01 | 24.5293 |
| 7/23/2010 22:02:01 | 24.551 | 11/3/2010 18:00:00 | 30.0 | 7/24/2010 19:46:01 | 24.5293 |
| 7/23/2010 22:22:01 | 24.551 | 11/3/2010 18:35:00 | 30.0 | 7/24/2010 20:06:01 | 24.5913 |
| 7/23/2010 22:42:01 | 24.551 | 11/3/2010 19:10:00 | 29.5 | 7/24/2010 20:26:01 | 24.5913 |
| 7/23/2010 23:02:01 | 24.551 | 11/3/2010 19:45:00 | 29.5 | 7/24/2010 20:46:01 | 24.5913 |
| 7/23/2010 23:22:01 | 24.551 | 11/3/2010 20:20:00 | 29.5 | 7/24/2010 21:06:01 | 24.5913 |
| 7/23/2010 23:42:01 | 24.551 | 11/3/2010 20:55:00 | 29.5 | 7/24/2010 21:26:01 | 24.5913 |

|                    |        |                    |      |                    |         |
|--------------------|--------|--------------------|------|--------------------|---------|
| 7/24/2010 00:02:01 | 24.551 | 11/3/2010 21:30:00 | 29.5 | 7/24/2010 21:46:01 | 24.5913 |
| 7/24/2010 00:22:01 | 24.551 | 11/3/2010 22:05:00 | 29.5 | 7/24/2010 22:06:01 | 24.6543 |
| 7/24/2010 00:42:01 | 24.489 | 11/3/2010 22:40:00 | 29.5 | 7/24/2010 22:26:01 | 24.6543 |
| 7/24/2010 01:02:01 | 24.489 | 11/3/2010 23:15:00 | 29.5 | 7/24/2010 22:46:01 | 24.6543 |
| 7/24/2010 01:22:01 | 24.489 | 11/3/2010 23:50:00 | 29.5 | 7/24/2010 23:06:01 | 24.6543 |
| 7/24/2010 01:42:01 | 24.489 | 11/4/2010 00:25:00 | 29.5 | 7/24/2010 23:26:01 | 24.6543 |
| 7/24/2010 02:02:01 | 24.489 | 11/4/2010 01:00:00 | 29.5 | 7/24/2010 23:46:01 | 24.6543 |
| 7/24/2010 02:22:01 | 24.489 | 11/4/2010 01:35:00 | 29.5 | 7/25/2010 00:06:01 | 24.7173 |
| 7/24/2010 02:42:01 | 24.489 | 11/4/2010 02:10:00 | 29.5 | 7/25/2010 00:26:01 | 24.7173 |
| 7/24/2010 03:02:01 | 24.489 | 11/4/2010 02:45:00 | 29.5 | 7/25/2010 00:46:01 | 24.7173 |
| 7/24/2010 03:22:01 | 24.426 | 11/4/2010 03:20:00 | 29.0 | 7/25/2010 01:06:01 | 24.7173 |
| 7/24/2010 03:42:01 | 24.426 | 11/4/2010 03:55:00 | 29.5 | 7/25/2010 01:26:01 | 24.7173 |
| 7/24/2010 04:02:01 | 24.426 | 11/4/2010 04:30:00 | 29.0 | 7/25/2010 01:46:01 | 24.7173 |
| 7/24/2010 04:22:01 | 24.426 | 11/4/2010 05:05:00 | 29.0 | 7/25/2010 02:06:01 | 24.7173 |
| 7/24/2010 04:42:01 | 24.364 | 11/4/2010 05:40:00 | 29.0 | 7/25/2010 02:26:01 | 24.7173 |
| 7/24/2010 05:02:01 | 24.364 | 11/4/2010 06:15:00 | 29.0 | 7/25/2010 02:46:01 | 24.7173 |
| 7/24/2010 05:22:01 | 24.364 | 11/4/2010 06:50:00 | 29.0 | 7/25/2010 03:06:01 | 24.7173 |
| 7/24/2010 05:42:01 | 24.364 | 11/4/2010 07:25:00 | 29.0 | 7/25/2010 03:26:01 | 24.7793 |
| 7/24/2010 06:02:01 | 24.301 | 11/4/2010 08:00:00 | 29.0 | 7/25/2010 03:46:01 | 24.7793 |
| 7/24/2010 06:22:01 | 24.301 | 11/4/2010 08:35:00 | 29.0 | 7/25/2010 04:06:01 | 24.7793 |
| 7/24/2010 06:42:01 | 24.301 | 11/4/2010 09:10:00 | 29.0 | 7/25/2010 04:26:01 | 24.7793 |
| 7/24/2010 07:02:01 | 24.239 | 11/4/2010 09:45:00 | 29.0 | 7/25/2010 04:46:01 | 24.7793 |
| 7/24/2010 07:22:01 | 24.239 | 11/4/2010 10:20:00 | 29.0 | 7/25/2010 05:06:01 | 24.7793 |
| 7/24/2010 07:42:01 | 24.239 | 11/4/2010 10:55:00 | 29.0 | 7/25/2010 05:26:01 | 24.7173 |
| 7/24/2010 08:02:01 | 24.239 | 11/4/2010 11:30:00 | 29.0 | 7/25/2010 05:46:01 | 24.7173 |
| 7/24/2010 08:22:01 | 24.176 | 11/4/2010 12:05:00 | 29.0 | 7/25/2010 06:06:01 | 24.7173 |
| 7/24/2010 08:42:01 | 24.176 | 11/4/2010 12:40:00 | 29.0 | 7/25/2010 06:26:01 | 24.7173 |
| 7/24/2010 09:02:01 | 24.176 | 11/4/2010 13:15:00 | 29.0 | 7/25/2010 06:46:01 | 24.7173 |
| 7/24/2010 09:22:01 | 24.114 | 11/4/2010 13:50:00 | 29.0 | 7/25/2010 07:06:01 | 24.7173 |
| 7/24/2010 09:42:01 | 24.114 | 11/4/2010 14:25:00 | 29.0 | 7/25/2010 07:26:01 | 24.7173 |
| 7/24/2010 10:02:01 | 24.114 | 11/4/2010 15:00:00 | 29.5 | 7/25/2010 07:46:01 | 24.7173 |
| 7/24/2010 10:22:01 | 24.051 | 11/4/2010 15:35:00 | 29.5 | 7/25/2010 08:06:01 | 24.7173 |
| 7/24/2010 10:42:01 | 24.051 | 11/4/2010 16:10:00 | 29.5 | 7/25/2010 08:26:01 | 24.7173 |
| 7/24/2010 11:02:01 | 23.989 | 11/4/2010 16:45:00 | 29.5 | 7/25/2010 08:46:01 | 24.7173 |
| 7/24/2010 11:22:01 | 23.989 | 11/4/2010 17:20:00 | 29.5 | 7/25/2010 09:06:01 | 24.7173 |
| 7/24/2010 11:42:01 | 23.989 | 11/4/2010 17:55:00 | 29.5 | 7/25/2010 09:26:01 | 24.6543 |
| 7/24/2010 12:02:01 | 23.989 | 11/4/2010 18:30:00 | 29.5 | 7/25/2010 09:46:01 | 24.6543 |
| 7/24/2010 12:22:01 | 23.926 | 11/4/2010 19:05:00 | 29.5 | 7/25/2010 10:06:01 | 24.6543 |
| 7/24/2010 12:42:01 | 23.926 | 11/4/2010 19:40:00 | 30.0 | 7/25/2010 10:26:01 | 24.6543 |
| 7/24/2010 13:02:01 | 23.926 | 11/4/2010 20:15:00 | 29.5 | 7/25/2010 10:46:01 | 24.6543 |
| 7/24/2010 13:22:01 | 23.926 | 11/4/2010 20:50:00 | 29.5 | 7/25/2010 11:06:01 | 24.5913 |
| 7/24/2010 13:42:01 | 23.926 | 11/4/2010 21:25:00 | 30.0 | 7/25/2010 11:26:01 | 24.5913 |
| 7/24/2010 14:02:01 | 23.926 | 11/4/2010 22:00:00 | 30.0 | 7/25/2010 11:46:01 | 24.5913 |
| 7/24/2010 14:22:01 | 23.926 | 11/4/2010 22:35:00 | 30.0 | 7/25/2010 12:06:01 | 24.5913 |
| 7/24/2010 14:42:01 | 23.926 | 11/4/2010 23:10:00 | 29.5 | 7/25/2010 12:26:01 | 24.5913 |
| 7/24/2010 15:02:01 | 23.926 | 11/4/2010 23:45:00 | 29.5 | 7/25/2010 12:46:01 | 24.5293 |
| 7/24/2010 15:22:01 | 23.989 | 11/5/2010 00:20:00 | 29.5 | 7/25/2010 13:06:01 | 24.5293 |
| 7/24/2010 15:42:01 | 23.989 | 11/5/2010 00:55:00 | 29.5 | 7/25/2010 13:26:01 | 24.5293 |
| 7/24/2010 16:02:01 | 23.989 | 11/5/2010 01:30:00 | 29.5 | 7/25/2010 13:46:01 | 24.5293 |
| 7/24/2010 16:22:01 | 24.051 | 11/5/2010 02:05:00 | 29.5 | 7/25/2010 14:06:01 | 24.5293 |

|                    |        |                    |      |                    |         |
|--------------------|--------|--------------------|------|--------------------|---------|
| 7/24/2010 16:42:01 | 24.051 | 11/5/2010 02:40:00 | 29.5 | 7/25/2010 14:26:01 | 24.5293 |
| 7/24/2010 17:02:01 | 24.114 | 11/5/2010 03:15:00 | 29.5 | 7/25/2010 14:46:01 | 24.5293 |
| 7/24/2010 17:22:01 | 24.114 | 11/5/2010 03:50:00 | 29.0 | 7/25/2010 15:06:01 | 24.4663 |
| 7/24/2010 17:42:01 | 24.176 | 11/5/2010 04:25:00 | 29.0 | 7/25/2010 15:26:01 | 24.4663 |
| 7/24/2010 18:02:01 | 24.176 | 11/5/2010 05:00:00 | 29.0 | 7/25/2010 15:46:01 | 24.4663 |
| 7/24/2010 18:22:01 | 24.239 | 11/5/2010 05:35:00 | 29.0 | 7/25/2010 16:06:01 | 24.4663 |
| 7/24/2010 18:42:01 | 24.239 | 11/5/2010 06:10:00 | 29.0 | 7/25/2010 16:26:01 | 24.4663 |
| 7/24/2010 19:02:01 | 24.301 | 11/5/2010 06:45:00 | 29.0 | 7/25/2010 16:46:01 | 24.4663 |
| 7/24/2010 19:22:01 | 24.301 | 11/5/2010 07:20:00 | 29.0 | 7/25/2010 17:06:01 | 24.4663 |
| 7/24/2010 19:42:01 | 24.364 | 11/5/2010 07:55:00 | 29.0 | 7/25/2010 17:26:01 | 24.4663 |
| 7/24/2010 20:02:01 | 24.364 | 11/5/2010 08:30:00 | 29.0 | 7/25/2010 17:46:01 | 24.4663 |
| 7/24/2010 20:22:01 | 24.364 | 11/5/2010 09:05:00 | 29.0 | 7/25/2010 18:06:01 | 24.4663 |
| 7/24/2010 20:42:01 | 24.426 | 11/5/2010 09:40:00 | 28.5 | 7/25/2010 18:26:01 | 24.4663 |
| 7/24/2010 21:02:01 | 24.426 | 11/5/2010 10:15:00 | 28.5 | 7/25/2010 18:46:01 | 24.4663 |
| 7/24/2010 21:22:01 | 24.426 | 11/5/2010 10:50:00 | 28.5 | 7/25/2010 19:06:01 | 24.4663 |
| 7/24/2010 21:42:01 | 24.489 | 11/5/2010 11:25:00 | 28.5 | 7/25/2010 19:26:01 | 24.4663 |
| 7/24/2010 22:02:01 | 24.489 | 11/5/2010 12:00:00 | 28.5 | 7/25/2010 19:46:01 | 24.5293 |
| 7/24/2010 22:22:01 | 24.489 | 11/5/2010 12:35:00 | 28.5 | 7/25/2010 20:06:01 | 24.5293 |
| 7/24/2010 22:42:01 | 24.489 | 11/5/2010 13:10:00 | 28.5 | 7/25/2010 20:26:01 | 24.5293 |
| 7/24/2010 23:02:01 | 24.489 | 11/5/2010 13:45:00 | 28.5 | 7/25/2010 20:46:01 | 24.5293 |
| 7/24/2010 23:22:01 | 24.489 | 11/5/2010 14:20:00 | 29.0 | 7/25/2010 21:06:01 | 24.5293 |
| 7/24/2010 23:42:01 | 24.489 | 11/5/2010 14:55:00 | 29.0 | 7/25/2010 21:26:01 | 24.5293 |
| 7/25/2010 00:02:01 | 24.489 | 11/5/2010 15:30:00 | 29.0 | 7/25/2010 21:46:01 | 24.5913 |
| 7/25/2010 00:22:01 | 24.489 | 11/5/2010 16:05:00 | 29.0 | 7/25/2010 22:06:01 | 24.5913 |
| 7/25/2010 00:42:01 | 24.489 | 11/5/2010 16:40:00 | 29.0 | 7/25/2010 22:26:01 | 24.5913 |
| 7/25/2010 01:02:01 | 24.489 | 11/5/2010 17:15:00 | 29.0 | 7/25/2010 22:46:01 | 24.5913 |
| 7/25/2010 01:22:01 | 24.489 | 11/5/2010 17:50:00 | 29.5 | 7/25/2010 23:06:01 | 24.5913 |
| 7/25/2010 01:42:01 | 24.489 | 11/5/2010 18:25:00 | 29.5 | 7/25/2010 23:26:01 | 24.5913 |
| 7/25/2010 02:02:01 | 24.489 | 11/5/2010 19:00:00 | 29.5 | 7/25/2010 23:46:01 | 24.5913 |
| 7/25/2010 02:22:01 | 24.489 | 11/5/2010 19:35:00 | 29.5 | 7/26/2010 00:06:01 | 24.5913 |
| 7/25/2010 02:42:01 | 24.489 | 11/5/2010 20:10:00 | 29.5 | 7/26/2010 00:26:01 | 24.6543 |
| 7/25/2010 03:02:01 | 24.489 | 11/5/2010 20:45:00 | 29.5 | 7/26/2010 00:46:01 | 24.6543 |
| 7/25/2010 03:22:01 | 24.426 | 11/5/2010 21:20:00 | 29.5 | 7/26/2010 01:06:01 | 24.6543 |
| 7/25/2010 03:42:01 | 24.426 | 11/5/2010 21:55:00 | 29.5 | 7/26/2010 01:26:01 | 24.6543 |
| 7/25/2010 04:02:01 | 24.426 | 11/5/2010 22:30:00 | 29.5 | 7/26/2010 01:46:01 | 24.6543 |
| 7/25/2010 04:22:01 | 24.426 | 11/5/2010 23:05:00 | 29.5 | 7/26/2010 02:06:01 | 24.6543 |
| 7/25/2010 04:42:01 | 24.426 | 11/5/2010 23:40:00 | 29.5 | 7/26/2010 02:26:01 | 24.6543 |
| 7/25/2010 05:02:01 | 24.364 | 11/6/2010 00:15:00 | 29.5 | 7/26/2010 02:46:01 | 24.6543 |
| 7/25/2010 05:22:01 | 24.364 | 11/6/2010 00:50:00 | 29.5 | 7/26/2010 03:06:01 | 24.6543 |
| 7/25/2010 05:42:01 | 24.364 | 11/6/2010 01:25:00 | 29.0 | 7/26/2010 03:26:01 | 24.6543 |
| 7/25/2010 06:02:01 | 24.301 | 11/6/2010 02:00:00 | 29.0 | 7/26/2010 03:46:01 | 24.6543 |
| 7/25/2010 06:22:01 | 24.301 | 11/6/2010 02:35:00 | 29.0 | 7/26/2010 04:06:01 | 24.6543 |
| 7/25/2010 06:42:01 | 24.301 | 11/6/2010 03:10:00 | 29.0 | 7/26/2010 04:26:01 | 24.6543 |
| 7/25/2010 07:02:01 | 24.301 | 11/6/2010 03:45:00 | 29.0 | 7/26/2010 04:46:01 | 24.6543 |
| 7/25/2010 07:22:01 | 24.239 | 11/6/2010 04:20:00 | 29.0 | 7/26/2010 05:06:01 | 24.6543 |
| 7/25/2010 07:42:01 | 24.239 | 11/6/2010 04:55:00 | 29.0 | 7/26/2010 05:26:01 | 24.6543 |
| 7/25/2010 08:02:01 | 24.239 | 11/6/2010 05:30:00 | 29.0 | 7/26/2010 05:46:01 | 24.6543 |
| 7/25/2010 08:22:01 | 24.176 | 11/6/2010 06:05:00 | 28.5 | 7/26/2010 06:06:01 | 24.6543 |
| 7/25/2010 08:42:01 | 24.176 | 11/6/2010 06:40:00 | 28.5 | 7/26/2010 06:26:01 | 24.5913 |
| 7/25/2010 09:02:01 | 24.176 | 11/6/2010 07:15:00 | 28.5 | 7/26/2010 06:46:01 | 24.5913 |

|                    |        |                    |      |                    |         |
|--------------------|--------|--------------------|------|--------------------|---------|
| 7/25/2010 09:22:01 | 24.114 | 11/6/2010 07:50:00 | 28.5 | 7/26/2010 07:06:01 | 24.5913 |
| 7/25/2010 09:42:01 | 24.114 | 11/6/2010 08:25:00 | 28.5 | 7/26/2010 07:26:01 | 24.5913 |
| 7/25/2010 10:02:01 | 24.114 | 11/6/2010 09:00:00 | 28.5 | 7/26/2010 07:46:01 | 24.5913 |
| 7/25/2010 10:22:01 | 24.051 | 11/6/2010 09:35:00 | 28.5 | 7/26/2010 08:06:01 | 24.5913 |
| 7/25/2010 10:42:01 | 24.051 | 11/6/2010 10:10:00 | 28.5 | 7/26/2010 08:26:01 | 24.5913 |
| 7/25/2010 11:02:01 | 24.051 | 11/6/2010 10:45:00 | 28.5 | 7/26/2010 08:46:01 | 24.5293 |
| 7/25/2010 11:22:01 | 23.989 | 11/6/2010 11:20:00 | 28.5 | 7/26/2010 09:06:01 | 24.5293 |
| 7/25/2010 11:42:01 | 23.989 | 11/6/2010 11:55:00 | 28.5 | 7/26/2010 09:26:01 | 24.5293 |
| 7/25/2010 12:02:01 | 23.989 | 11/6/2010 12:30:00 | 28.5 | 7/26/2010 09:46:01 | 24.5293 |
| 7/25/2010 12:22:01 | 23.926 | 11/6/2010 13:05:00 | 28.5 | 7/26/2010 10:06:01 | 24.5293 |
| 7/25/2010 12:42:01 | 23.926 | 11/6/2010 13:40:00 | 28.5 | 7/26/2010 10:26:01 | 24.5293 |
| 7/25/2010 13:02:01 | 23.926 | 11/6/2010 14:15:00 | 28.5 | 7/26/2010 10:46:01 | 24.4663 |
| 7/25/2010 13:22:01 | 23.926 | 11/6/2010 14:50:00 | 29.0 | 7/26/2010 11:06:01 | 24.4663 |
| 7/25/2010 13:42:01 | 23.926 | 11/6/2010 15:25:00 | 29.0 | 7/26/2010 11:26:01 | 24.4663 |
| 7/25/2010 14:02:01 | 23.926 | 11/6/2010 16:00:00 | 29.0 | 7/26/2010 11:46:01 | 24.4663 |
| 7/25/2010 14:22:01 | 23.926 | 11/6/2010 16:35:00 | 29.0 | 7/26/2010 12:06:01 | 24.4043 |
| 7/25/2010 14:42:01 | 23.926 | 11/6/2010 17:10:00 | 29.0 | 7/26/2010 12:26:01 | 24.4043 |
| 7/25/2010 15:02:01 | 23.926 | 11/6/2010 17:45:00 | 29.0 | 7/26/2010 12:46:01 | 24.4043 |
| 7/25/2010 15:22:01 | 23.926 | 11/6/2010 18:20:00 | 29.5 | 7/26/2010 13:06:01 | 24.4043 |
| 7/25/2010 15:42:01 | 23.989 | 11/6/2010 18:55:00 | 29.5 | 7/26/2010 13:26:01 | 24.4043 |
| 7/25/2010 16:02:01 | 23.989 | 11/6/2010 19:30:00 | 29.5 | 7/26/2010 13:46:01 | 24.3413 |
| 7/25/2010 16:22:01 | 23.989 | 11/6/2010 20:05:00 | 29.5 | 7/26/2010 14:06:01 | 24.3413 |
| 7/25/2010 16:42:01 | 24.051 | 11/6/2010 20:40:00 | 29.5 | 7/26/2010 14:26:01 | 24.3413 |
| 7/25/2010 17:02:01 | 24.051 | 11/6/2010 21:15:00 | 29.5 | 7/26/2010 14:46:01 | 24.3413 |
| 7/25/2010 17:22:01 | 24.114 | 11/6/2010 21:50:00 | 29.5 | 7/26/2010 15:06:01 | 24.3413 |
| 7/25/2010 17:42:01 | 24.114 | 11/6/2010 22:25:00 | 29.5 | 7/26/2010 15:26:01 | 24.3413 |
| 7/25/2010 18:02:01 | 24.176 | 11/6/2010 23:00:00 | 29.5 | 7/26/2010 15:46:01 | 24.3413 |
| 7/25/2010 18:22:01 | 24.176 | 11/6/2010 23:35:00 | 29.5 | 7/26/2010 16:06:01 | 24.2793 |
| 7/25/2010 18:42:01 | 24.239 | 11/7/2010 00:10:00 | 29.5 | 7/26/2010 16:26:01 | 24.2793 |
| 7/25/2010 19:02:01 | 24.239 | 11/7/2010 00:45:00 | 29.5 | 7/26/2010 16:46:01 | 24.2793 |
| 7/25/2010 19:22:01 | 24.301 | 11/7/2010 01:20:00 | 29.5 | 7/26/2010 17:06:01 | 24.2793 |
| 7/25/2010 19:42:01 | 24.301 | 11/7/2010 01:55:00 | 29.0 | 7/26/2010 17:26:01 | 24.2793 |
| 7/25/2010 20:02:01 | 24.301 | 11/7/2010 02:30:00 | 29.0 | 7/26/2010 17:46:01 | 24.2793 |
| 7/25/2010 20:22:01 | 24.364 | 11/7/2010 03:05:00 | 29.0 | 7/26/2010 18:06:01 | 24.2793 |
| 7/25/2010 20:42:01 | 24.364 | 11/7/2010 03:40:00 | 29.0 | 7/26/2010 18:26:01 | 24.2793 |
| 7/25/2010 21:02:01 | 24.364 | 11/7/2010 04:15:00 | 29.0 | 7/26/2010 18:46:01 | 24.2793 |
| 7/25/2010 21:22:01 | 24.426 | 11/7/2010 04:50:00 | 29.0 | 7/26/2010 19:06:01 | 24.2793 |
| 7/25/2010 21:42:01 | 24.426 | 11/7/2010 05:25:00 | 29.0 | 7/26/2010 19:26:01 | 24.3413 |
| 7/25/2010 22:02:01 | 24.426 | 11/7/2010 06:00:00 | 29.0 | 7/26/2010 19:46:01 | 24.3413 |
| 7/25/2010 22:22:01 | 24.426 | 11/7/2010 06:35:00 | 29.0 | 7/26/2010 20:06:01 | 24.3413 |
| 7/25/2010 22:42:01 | 24.426 | 11/7/2010 07:10:00 | 28.5 | 7/26/2010 20:26:01 | 24.3413 |
| 7/25/2010 23:02:01 | 24.426 | 11/7/2010 07:45:00 | 28.5 | 7/26/2010 20:46:01 | 24.3413 |
| 7/25/2010 23:22:01 | 24.426 | 11/7/2010 08:20:00 | 28.5 | 7/26/2010 21:06:01 | 24.3413 |
| 7/25/2010 23:42:01 | 24.426 | 11/7/2010 08:55:00 | 28.5 | 7/26/2010 21:26:01 | 24.4043 |
| 7/26/2010 00:02:01 | 24.426 | 11/7/2010 09:30:00 | 28.5 | 7/26/2010 21:46:01 | 24.4043 |
| 7/26/2010 00:22:01 | 24.426 | 11/7/2010 10:05:00 | 28.5 | 7/26/2010 22:06:01 | 24.4043 |
| 7/26/2010 00:42:01 | 24.426 | 11/7/2010 10:40:00 | 28.5 | 7/26/2010 22:26:01 | 24.4043 |
| 7/26/2010 01:02:01 | 24.426 | 11/7/2010 11:15:00 | 28.5 | 7/26/2010 22:46:01 | 24.4043 |
| 7/26/2010 01:22:01 | 24.426 | 11/7/2010 11:50:00 | 28.5 | 7/26/2010 23:06:01 | 24.4043 |
| 7/26/2010 01:42:01 | 24.364 | 11/7/2010 12:25:00 | 28.5 | 7/26/2010 23:26:01 | 24.4043 |

|                    |        |                    |      |                    |         |
|--------------------|--------|--------------------|------|--------------------|---------|
| 7/26/2010 02:02:01 | 24.364 | 11/7/2010 13:00:00 | 28.5 | 7/26/2010 23:46:01 | 24.4043 |
| 7/26/2010 02:22:01 | 24.364 | 11/7/2010 13:35:00 | 28.5 | 7/27/2010 00:06:01 | 24.4663 |
| 7/26/2010 02:42:01 | 24.364 | 11/7/2010 14:10:00 | 29.0 | 7/27/2010 00:26:01 | 24.4663 |
| 7/26/2010 03:02:01 | 24.364 | 11/7/2010 14:45:00 | 29.0 | 7/27/2010 00:46:01 | 24.4663 |
| 7/26/2010 03:22:01 | 24.301 | 11/7/2010 15:20:00 | 29.0 | 7/27/2010 01:06:01 | 24.4663 |
| 7/26/2010 03:42:01 | 24.301 | 11/7/2010 15:55:00 | 29.5 | 7/27/2010 01:26:01 | 24.4663 |
| 7/26/2010 04:02:01 | 24.301 | 11/7/2010 16:30:00 | 29.5 | 7/27/2010 01:46:01 | 24.4663 |
| 7/26/2010 04:22:01 | 24.239 | 11/7/2010 17:05:00 | 29.5 | 7/27/2010 02:06:01 | 24.4663 |
| 7/26/2010 04:42:01 | 24.239 | 11/7/2010 17:40:00 | 29.5 | 7/27/2010 02:26:01 | 24.4663 |
| 7/26/2010 05:02:01 | 24.239 | 11/7/2010 18:15:00 | 29.5 | 7/27/2010 02:46:01 | 24.4663 |
| 7/26/2010 05:22:01 | 24.239 | 11/7/2010 18:50:00 | 30.0 | 7/27/2010 03:06:01 | 24.5293 |
| 7/26/2010 05:42:01 | 24.176 | 11/7/2010 19:25:00 | 30.0 | 7/27/2010 03:26:01 | 24.5293 |
| 7/26/2010 06:02:01 | 24.176 | 11/7/2010 20:00:00 | 30.0 | 7/27/2010 03:46:01 | 24.5293 |
| 7/26/2010 06:22:01 | 24.176 | 11/7/2010 20:35:00 | 30.0 | 7/27/2010 04:06:01 | 24.5293 |
| 7/26/2010 06:42:01 | 24.114 | 11/7/2010 21:10:00 | 30.0 | 7/27/2010 04:26:01 | 24.5293 |
| 7/26/2010 07:02:01 | 24.114 | 11/7/2010 21:45:00 | 30.0 | 7/27/2010 04:46:01 | 24.5293 |
| 7/26/2010 07:22:01 | 24.051 | 11/7/2010 22:20:00 | 30.0 | 7/27/2010 05:06:01 | 24.5293 |
| 7/26/2010 07:42:01 | 24.051 | 11/7/2010 22:55:00 | 30.0 | 7/27/2010 05:26:01 | 24.5293 |
| 7/26/2010 08:02:01 | 24.051 | 11/7/2010 23:30:00 | 30.0 | 7/27/2010 05:46:01 | 24.5293 |
| 7/26/2010 08:22:01 | 23.989 | 11/8/2010 00:05:00 | 29.5 | 7/27/2010 06:06:01 | 24.5293 |
| 7/26/2010 08:42:01 | 23.989 | 11/8/2010 00:40:00 | 29.5 | 7/27/2010 06:26:01 | 24.5293 |
| 7/26/2010 09:02:01 | 23.989 | 11/8/2010 01:15:00 | 29.5 | 7/27/2010 06:46:01 | 24.5293 |
| 7/26/2010 09:22:01 | 23.926 | 11/8/2010 01:50:00 | 29.5 | 7/27/2010 07:06:01 | 24.5293 |
| 7/26/2010 09:42:01 | 23.926 | 11/8/2010 02:25:00 | 29.5 | 7/27/2010 07:26:01 | 24.5293 |
| 7/26/2010 10:02:01 | 23.864 | 11/8/2010 03:00:00 | 29.5 | 7/27/2010 07:46:01 | 24.5293 |
| 7/26/2010 10:22:01 | 23.864 | 11/8/2010 03:35:00 | 29.5 | 7/27/2010 08:06:01 | 24.5293 |
| 7/26/2010 10:42:01 | 23.864 | 11/8/2010 04:10:00 | 29.5 | 7/27/2010 08:26:01 | 24.5293 |
| 7/26/2010 11:02:01 | 23.801 | 11/8/2010 04:45:00 | 29.5 | 7/27/2010 08:46:01 | 24.4663 |
| 7/26/2010 11:22:01 | 23.801 | 11/8/2010 05:20:00 | 29.5 | 7/27/2010 09:06:01 | 24.4663 |
| 7/26/2010 11:42:01 | 23.801 | 11/8/2010 05:55:00 | 29.5 | 7/27/2010 09:26:01 | 24.4663 |
| 7/26/2010 12:02:01 | 23.739 | 11/8/2010 06:30:00 | 29.5 | 7/27/2010 09:46:01 | 24.4663 |
| 7/26/2010 12:22:01 | 23.739 | 11/8/2010 07:05:00 | 29.0 | 7/27/2010 10:06:01 | 24.4663 |
| 7/26/2010 12:42:01 | 23.739 | 11/8/2010 07:40:00 | 29.0 | 7/27/2010 10:26:01 | 24.4663 |
| 7/26/2010 13:02:01 | 23.739 | 11/8/2010 08:15:00 | 29.0 | 7/27/2010 10:46:01 | 24.4663 |
| 7/26/2010 13:22:01 | 23.676 | 11/8/2010 08:50:00 | 29.0 | 7/27/2010 11:06:01 | 24.4663 |
| 7/26/2010 13:42:01 | 23.676 | 11/8/2010 09:25:00 | 29.0 | 7/27/2010 11:26:01 | 24.4663 |
| 7/26/2010 14:02:01 | 23.676 | 11/8/2010 10:00:00 | 29.0 | 7/27/2010 11:46:01 | 24.4663 |
| 7/26/2010 14:22:01 | 23.676 | 11/8/2010 10:35:00 | 29.0 | 7/27/2010 12:06:01 | 24.4043 |
| 7/26/2010 14:42:01 | 23.676 | 11/8/2010 11:10:00 | 29.0 | 7/27/2010 12:26:01 | 24.4043 |
| 7/26/2010 15:02:01 | 23.676 | 11/8/2010 11:45:00 | 29.0 | 7/27/2010 12:46:01 | 24.4043 |
| 7/26/2010 15:22:01 | 23.676 | 11/8/2010 12:20:00 | 29.0 | 7/27/2010 13:06:01 | 24.4043 |
| 7/26/2010 15:42:01 | 23.739 | 11/8/2010 12:55:00 | 29.0 | 7/27/2010 13:26:01 | 24.4043 |
| 7/26/2010 16:02:01 | 23.739 | 11/8/2010 13:30:00 | 29.0 | 7/27/2010 13:46:01 | 24.4043 |
| 7/26/2010 16:22:01 | 23.739 | 11/8/2010 14:05:00 | 29.0 | 7/27/2010 14:06:01 | 24.4043 |
| 7/26/2010 16:42:01 | 23.801 | 11/8/2010 14:40:00 | 29.5 | 7/27/2010 14:26:01 | 24.4043 |
| 7/26/2010 17:02:01 | 23.801 | 11/8/2010 15:15:00 | 29.5 | 7/27/2010 14:46:01 | 24.4043 |
| 7/26/2010 17:22:01 | 23.864 | 11/8/2010 15:50:00 | 29.5 | 7/27/2010 15:06:01 | 24.4043 |
| 7/26/2010 17:42:01 | 23.864 | 11/8/2010 16:25:00 | 29.5 | 7/27/2010 15:26:01 | 24.4043 |
| 7/26/2010 18:02:01 | 23.864 | 11/8/2010 17:00:00 | 30.0 | 7/27/2010 15:46:01 | 24.4043 |
| 7/26/2010 18:22:01 | 23.926 | 11/8/2010 17:35:00 | 30.0 | 7/27/2010 16:06:01 | 24.4043 |

|                    |        |                    |      |                    |         |
|--------------------|--------|--------------------|------|--------------------|---------|
| 7/26/2010 18:42:01 | 23.926 | 11/8/2010 18:10:00 | 30.0 | 7/27/2010 16:26:01 | 24.4043 |
| 7/26/2010 19:02:01 | 23.989 | 11/8/2010 18:45:00 | 30.0 | 7/27/2010 16:46:01 | 24.4043 |
| 7/26/2010 19:22:01 | 23.989 | 11/8/2010 19:20:00 | 30.0 | 7/27/2010 17:06:01 | 24.4043 |
| 7/26/2010 19:42:01 | 24.051 | 11/8/2010 19:55:00 | 30.0 | 7/27/2010 17:26:01 | 24.4043 |
| 7/26/2010 20:02:01 | 24.051 | 11/8/2010 20:30:00 | 30.0 | 7/27/2010 17:46:01 | 24.4043 |
| 7/26/2010 20:22:01 | 24.051 | 11/8/2010 21:05:00 | 30.0 | 7/27/2010 18:06:01 | 24.4043 |
| 7/26/2010 20:42:01 | 24.051 | 11/8/2010 21:40:00 | 30.0 | 7/27/2010 18:26:01 | 24.4043 |
| 7/26/2010 21:02:01 | 24.114 | 11/8/2010 22:15:00 | 30.0 | 7/27/2010 18:46:01 | 24.4043 |
| 7/26/2010 21:22:01 | 24.114 | 11/8/2010 22:50:00 | 30.0 | 7/27/2010 19:06:01 | 24.4043 |
| 7/26/2010 21:42:01 | 24.114 | 11/8/2010 23:25:00 | 30.0 | 7/27/2010 19:26:01 | 24.4043 |
| 7/26/2010 22:02:01 | 24.176 | 11/9/2010 00:00:00 | 30.0 | 7/27/2010 19:46:01 | 24.4663 |
| 7/26/2010 22:22:01 | 24.176 | 11/9/2010 00:35:00 | 30.0 | 7/27/2010 20:06:01 | 24.4663 |
| 7/26/2010 22:42:01 | 24.176 | 11/9/2010 01:10:00 | 30.0 | 7/27/2010 20:26:01 | 24.4663 |
| 7/26/2010 23:02:01 | 24.176 | 11/9/2010 01:45:00 | 29.5 | 7/27/2010 20:46:01 | 24.4663 |
| 7/26/2010 23:22:01 | 24.176 | 11/9/2010 02:20:00 | 29.5 | 7/27/2010 21:06:01 | 24.4663 |
| 7/26/2010 23:42:01 | 24.176 | 11/9/2010 02:55:00 | 29.5 | 7/27/2010 21:26:01 | 24.4663 |
| 7/27/2010 00:02:01 | 24.176 | 11/9/2010 03:30:00 | 29.5 | 7/27/2010 21:46:01 | 24.5293 |
| 7/27/2010 00:22:01 | 24.176 | 11/9/2010 04:05:00 | 29.5 | 7/27/2010 22:06:01 | 24.5293 |
| 7/27/2010 00:42:01 | 24.239 | 11/9/2010 04:40:00 | 29.5 | 7/27/2010 22:26:01 | 24.5293 |
| 7/27/2010 01:02:01 | 24.176 | 11/9/2010 05:15:00 | 29.5 | 7/27/2010 22:46:01 | 24.5293 |
| 7/27/2010 01:22:01 | 24.239 | 11/9/2010 05:50:00 | 29.5 | 7/27/2010 23:06:01 | 24.5293 |
| 7/27/2010 01:42:01 | 24.176 | 11/9/2010 06:25:00 | 29.5 | 7/27/2010 23:26:01 | 24.5293 |
| 7/27/2010 02:02:01 | 24.176 | 11/9/2010 07:00:00 | 29.5 | 7/27/2010 23:46:01 | 24.5913 |
| 7/27/2010 02:22:01 | 24.176 | 11/9/2010 07:35:00 | 29.0 | 7/28/2010 00:06:01 | 24.5913 |
| 7/27/2010 02:42:01 | 24.176 | 11/9/2010 08:10:00 | 29.0 | 7/28/2010 00:26:01 | 24.5913 |
| 7/27/2010 03:02:01 | 24.176 | 11/9/2010 08:45:00 | 29.0 | 7/28/2010 00:46:01 | 24.5913 |
| 7/27/2010 03:22:01 | 24.176 | 11/9/2010 09:20:00 | 29.0 | 7/28/2010 01:06:01 | 24.5913 |
| 7/27/2010 03:42:01 | 24.176 | 11/9/2010 09:55:00 | 29.0 | 7/28/2010 01:26:01 | 24.5913 |
| 7/27/2010 04:02:01 | 24.176 | 11/9/2010 10:30:00 | 29.0 | 7/28/2010 01:46:01 | 24.5913 |
| 7/27/2010 04:22:01 | 24.176 | 11/9/2010 11:05:00 | 29.0 | 7/28/2010 02:06:01 | 24.6543 |
| 7/27/2010 04:42:01 | 24.176 | 11/9/2010 11:40:00 | 29.0 | 7/28/2010 02:26:01 | 24.6543 |
| 7/27/2010 05:02:01 | 24.114 | 11/9/2010 12:15:00 | 29.0 | 7/28/2010 02:46:01 | 24.6543 |
| 7/27/2010 05:22:01 | 24.114 | 11/9/2010 12:50:00 | 29.0 | 7/28/2010 03:06:01 | 24.6543 |
| 7/27/2010 05:42:01 | 24.114 | 11/9/2010 13:25:00 | 29.0 | 7/28/2010 03:26:01 | 24.6543 |
| 7/27/2010 06:02:01 | 24.114 | 11/9/2010 14:00:00 | 29.0 | 7/28/2010 03:46:01 | 24.6543 |
| 7/27/2010 06:22:01 | 24.114 | 11/9/2010 14:35:00 | 29.5 | 7/28/2010 04:06:01 | 24.6543 |
| 7/27/2010 06:42:01 | 24.114 | 11/9/2010 15:10:00 | 29.5 | 7/28/2010 04:26:01 | 24.6543 |
| 7/27/2010 07:02:01 | 24.051 | 11/9/2010 15:45:00 | 29.5 | 7/28/2010 04:46:01 | 24.6543 |
| 7/27/2010 07:22:01 | 24.051 | 11/9/2010 16:20:00 | 29.5 | 7/28/2010 05:06:01 | 24.6543 |
| 7/27/2010 07:42:01 | 24.051 | 11/9/2010 16:55:00 | 30.0 | 7/28/2010 05:26:01 | 24.6543 |
| 7/27/2010 08:02:01 | 24.051 | 11/9/2010 17:30:00 | 30.0 | 7/28/2010 05:46:01 | 24.5913 |
| 7/27/2010 08:22:01 | 24.051 | 11/9/2010 18:05:00 | 30.0 | 7/28/2010 06:06:01 | 24.6543 |
| 7/27/2010 08:42:01 | 23.989 | 11/9/2010 18:40:00 | 30.0 | 7/28/2010 06:26:01 | 24.5913 |
| 7/27/2010 09:02:01 | 23.989 | 11/9/2010 19:15:00 | 30.0 | 7/28/2010 06:46:01 | 24.5913 |
| 7/27/2010 09:22:01 | 23.989 | 11/9/2010 19:50:00 | 30.0 | 7/28/2010 07:06:01 | 24.5913 |
| 7/27/2010 09:42:01 | 23.989 | 11/9/2010 20:25:00 | 30.0 | 7/28/2010 07:26:01 | 24.5913 |
| 7/27/2010 10:02:01 | 23.989 | 11/9/2010 21:00:00 | 30.0 | 7/28/2010 07:46:01 | 24.5913 |
| 7/27/2010 10:22:01 | 23.926 | 11/9/2010 21:35:00 | 30.0 | 7/28/2010 08:06:01 | 24.5913 |
| 7/27/2010 10:42:01 | 23.926 | 11/9/2010 22:10:00 | 30.0 | 7/28/2010 08:26:01 | 24.5913 |
| 7/27/2010 11:02:01 | 23.926 | 11/9/2010 22:45:00 | 30.0 | 7/28/2010 08:46:01 | 24.5913 |

|                    |        |                     |      |                    |         |
|--------------------|--------|---------------------|------|--------------------|---------|
| 7/27/2010 11:22:01 | 23.926 | 11/9/2010 23:20:00  | 30.0 | 7/28/2010 09:06:01 | 24.5913 |
| 7/27/2010 11:42:01 | 23.926 | 11/9/2010 23:55:00  | 30.0 | 7/28/2010 09:26:01 | 24.5293 |
| 7/27/2010 12:02:01 | 23.926 | 11/10/2010 00:30:00 | 29.5 | 7/28/2010 09:46:01 | 24.5293 |
| 7/27/2010 12:22:01 | 23.864 | 11/10/2010 01:05:00 | 29.5 | 7/28/2010 10:06:01 | 24.5293 |
| 7/27/2010 12:42:01 | 23.864 | 11/10/2010 01:40:00 | 29.5 | 7/28/2010 10:26:01 | 24.5293 |
| 7/27/2010 13:02:01 | 23.864 | 11/10/2010 02:15:00 | 29.5 | 7/28/2010 10:46:01 | 24.5293 |
| 7/27/2010 13:22:01 | 23.864 | 11/10/2010 02:50:00 | 29.5 | 7/28/2010 11:06:01 | 24.5293 |
| 7/27/2010 13:42:01 | 23.864 | 11/10/2010 03:25:00 | 29.5 | 7/28/2010 11:26:01 | 24.4663 |
| 7/27/2010 14:02:01 | 23.864 | 11/10/2010 04:00:00 | 29.5 | 7/28/2010 11:46:01 | 24.4663 |
| 7/27/2010 14:22:01 | 23.864 | 11/10/2010 04:35:00 | 29.5 | 7/28/2010 12:06:01 | 24.4663 |
| 7/27/2010 14:42:01 | 23.926 | 11/10/2010 05:10:00 | 29.5 | 7/28/2010 12:26:01 | 24.4663 |
| 7/27/2010 15:02:01 | 23.926 | 11/10/2010 05:45:00 | 29.0 | 7/28/2010 12:46:01 | 24.4663 |
| 7/27/2010 15:22:01 | 23.926 | 11/10/2010 06:20:00 | 29.0 | 7/28/2010 13:06:01 | 24.4043 |
| 7/27/2010 15:42:01 | 23.926 | 11/10/2010 06:55:00 | 29.0 | 7/28/2010 13:26:01 | 24.4043 |
| 7/27/2010 16:02:01 | 23.989 | 11/10/2010 07:30:00 | 29.0 | 7/28/2010 13:46:01 | 24.4043 |
| 7/27/2010 16:22:01 | 23.989 | 11/10/2010 08:05:00 | 29.0 | 7/28/2010 14:06:01 | 24.4043 |
| 7/27/2010 16:42:01 | 24.051 | 11/10/2010 08:40:00 | 29.0 | 7/28/2010 14:26:01 | 24.4043 |
| 7/27/2010 17:02:01 | 24.051 | 11/10/2010 09:15:00 | 29.0 | 7/28/2010 14:46:01 | 24.4043 |
| 7/27/2010 17:22:01 | 24.114 | 11/10/2010 09:50:00 | 29.0 | 7/28/2010 15:06:01 | 24.4043 |
| 7/27/2010 17:42:01 | 24.114 | 11/10/2010 10:25:00 | 28.5 | 7/28/2010 15:26:01 | 24.4043 |
| 7/27/2010 18:02:01 | 24.176 | 11/10/2010 11:00:00 | 28.5 | 7/28/2010 15:46:01 | 24.3413 |
| 7/27/2010 18:22:01 | 24.176 | 11/10/2010 11:35:00 | 29.0 | 7/28/2010 16:06:01 | 24.3413 |
| 7/27/2010 18:42:01 | 24.239 | 11/10/2010 12:10:00 | 29.0 | 7/28/2010 16:26:01 | 24.3413 |
| 7/27/2010 19:02:01 | 24.239 | 11/10/2010 12:45:00 | 29.0 | 7/28/2010 16:46:01 | 24.3413 |
| 7/27/2010 19:22:01 | 24.239 | 11/10/2010 13:20:00 | 29.0 | 7/28/2010 17:06:01 | 24.3413 |
| 7/27/2010 19:42:01 | 24.301 | 11/10/2010 13:55:00 | 29.0 | 7/28/2010 17:26:01 | 24.3413 |
| 7/27/2010 20:02:01 | 24.301 | 11/10/2010 14:30:00 | 29.0 | 7/28/2010 17:46:01 | 24.3413 |
| 7/27/2010 20:22:01 | 24.364 | 11/10/2010 15:05:00 | 29.0 | 7/28/2010 18:06:01 | 24.3413 |
| 7/27/2010 20:42:01 | 24.364 | 11/10/2010 15:40:00 | 29.5 | 7/28/2010 18:26:01 | 24.4043 |
| 7/27/2010 21:02:01 | 24.364 | 11/10/2010 16:15:00 | 29.5 | 7/28/2010 18:46:01 | 24.4043 |
| 7/27/2010 21:22:01 | 24.364 | 11/10/2010 16:50:00 | 29.5 | 7/28/2010 19:06:01 | 24.4043 |
| 7/27/2010 21:42:01 | 24.364 | 11/10/2010 17:25:00 | 29.5 | 7/28/2010 19:26:01 | 24.4043 |
| 7/27/2010 22:02:01 | 24.426 | 11/10/2010 18:00:00 | 29.5 | 7/28/2010 19:46:01 | 24.4043 |
| 7/27/2010 22:22:01 | 24.426 | 11/10/2010 18:35:00 | 30.0 | 7/28/2010 20:06:01 | 24.4043 |
| 7/27/2010 22:42:01 | 24.426 | 11/10/2010 19:10:00 | 30.0 | 7/28/2010 20:26:01 | 24.4043 |
| 7/27/2010 23:02:01 | 24.426 | 11/10/2010 19:45:00 | 30.0 | 7/28/2010 20:46:01 | 24.4663 |
| 7/27/2010 23:22:01 | 24.426 | 11/10/2010 20:20:00 | 30.0 | 7/28/2010 21:06:01 | 24.4663 |
| 7/27/2010 23:42:01 | 24.426 | 11/10/2010 20:55:00 | 30.0 | 7/28/2010 21:26:01 | 24.4663 |
| 7/28/2010 00:02:01 | 24.426 | 11/10/2010 21:30:00 | 30.0 | 7/28/2010 21:46:01 | 24.4663 |
| 7/28/2010 00:22:01 | 24.426 | 11/10/2010 22:05:00 | 30.0 | 7/28/2010 22:06:01 | 24.4663 |
| 7/28/2010 00:42:01 | 24.426 | 11/10/2010 22:40:00 | 30.0 | 7/28/2010 22:26:01 | 24.4663 |
| 7/28/2010 01:02:01 | 24.426 | 11/10/2010 23:15:00 | 30.0 | 7/28/2010 22:46:01 | 24.5293 |
| 7/28/2010 01:22:01 | 24.426 | 11/10/2010 23:50:00 | 29.5 | 7/28/2010 23:06:01 | 24.5293 |
| 7/28/2010 01:42:01 | 24.426 | 11/11/2010 00:25:00 | 29.5 | 7/28/2010 23:26:01 | 24.5293 |
| 7/28/2010 02:02:01 | 24.426 | 11/11/2010 01:00:00 | 29.5 | 7/28/2010 23:46:01 | 24.5293 |
| 7/28/2010 02:22:01 | 24.364 | 11/11/2010 01:35:00 | 29.5 | 7/29/2010 00:06:01 | 24.5293 |
| 7/28/2010 02:42:01 | 24.364 | 11/11/2010 02:10:00 | 29.5 | 7/29/2010 00:26:01 | 24.5293 |
| 7/28/2010 03:02:01 | 24.364 | 11/11/2010 02:45:00 | 29.5 | 7/29/2010 00:46:01 | 24.5913 |
| 7/28/2010 03:22:01 | 24.364 | 11/11/2010 03:20:00 | 29.5 | 7/29/2010 01:06:01 | 24.5913 |
| 7/28/2010 03:42:01 | 24.364 | 11/11/2010 03:55:00 | 29.0 | 7/29/2010 01:26:01 | 24.5913 |



|                    |        |                     |      |                    |         |
|--------------------|--------|---------------------|------|--------------------|---------|
| 7/28/2010 04:02:01 | 24.364 | 11/11/2010 04:30:00 | 29.0 | 7/29/2010 01:46:01 | 24.5913 |
| 7/28/2010 04:22:01 | 24.364 | 11/11/2010 05:05:00 | 29.0 | 7/29/2010 02:06:01 | 24.5913 |
| 7/28/2010 04:42:01 | 24.301 | 11/11/2010 05:40:00 | 29.0 | 7/29/2010 02:26:01 | 24.5913 |
| 7/28/2010 05:02:01 | 24.301 | 11/11/2010 06:15:00 | 29.0 | 7/29/2010 02:46:01 | 24.5913 |
| 7/28/2010 05:22:01 | 24.301 | 11/11/2010 06:50:00 | 29.0 | 7/29/2010 03:06:01 | 24.5913 |
| 7/28/2010 05:42:01 | 24.239 | 11/11/2010 07:25:00 | 29.0 | 7/29/2010 03:26:01 | 24.5913 |
| 7/28/2010 06:02:01 | 24.239 | 11/11/2010 08:00:00 | 29.0 | 7/29/2010 03:46:01 | 24.5913 |
| 7/28/2010 06:22:01 | 24.239 | 11/11/2010 08:35:00 | 28.5 | 7/29/2010 04:06:01 | 24.5913 |
| 7/28/2010 06:42:01 | 24.239 | 11/11/2010 09:10:00 | 28.5 | 7/29/2010 04:26:01 | 24.6543 |
| 7/28/2010 07:02:01 | 24.176 | 11/11/2010 09:45:00 | 28.5 | 7/29/2010 04:46:01 | 24.6543 |
| 7/28/2010 07:22:01 | 24.176 | 11/11/2010 10:20:00 | 28.5 | 7/29/2010 05:06:01 | 24.5913 |
| 7/28/2010 07:42:01 | 24.176 | 11/11/2010 10:55:00 | 28.5 | 7/29/2010 05:26:01 | 24.6543 |
| 7/28/2010 08:02:01 | 24.176 | 11/11/2010 11:30:00 | 28.5 | 7/29/2010 05:46:01 | 24.6543 |
| 7/28/2010 08:22:01 | 24.114 | 11/11/2010 12:05:00 | 28.5 | 7/29/2010 06:06:01 | 24.5913 |
| 7/28/2010 08:42:01 | 24.114 | 11/11/2010 12:40:00 | 28.5 | 7/29/2010 06:26:01 | 24.5913 |
| 7/28/2010 09:02:01 | 24.114 | 11/11/2010 13:15:00 | 28.5 | 7/29/2010 06:46:01 | 24.6543 |
| 7/28/2010 09:22:01 | 24.051 | 11/11/2010 13:50:00 | 29.0 | 7/29/2010 07:06:01 | 24.5913 |
| 7/28/2010 09:42:01 | 24.051 | 11/11/2010 14:25:00 | 29.0 | 7/29/2010 07:26:01 | 24.5913 |
| 7/28/2010 10:02:01 | 24.051 | 11/11/2010 15:00:00 | 29.0 | 7/29/2010 07:46:01 | 24.5913 |
| 7/28/2010 10:22:01 | 23.989 | 11/11/2010 15:35:00 | 29.0 | 7/29/2010 08:06:01 | 24.5913 |
| 7/28/2010 10:42:01 | 23.989 | 11/11/2010 16:10:00 | 29.0 | 7/29/2010 08:26:01 | 24.5913 |
| 7/28/2010 11:02:01 | 23.989 | 11/11/2010 16:45:00 | 29.5 | 7/29/2010 08:46:01 | 24.5913 |
| 7/28/2010 11:22:01 | 23.926 | 11/11/2010 17:20:00 | 29.5 | 7/29/2010 09:06:01 | 24.5913 |
| 7/28/2010 11:42:01 | 23.926 | 11/11/2010 17:55:00 | 29.5 | 7/29/2010 09:26:01 | 24.5913 |
| 7/28/2010 12:02:01 | 23.926 | 11/11/2010 18:30:00 | 29.5 | 7/29/2010 09:46:01 | 24.5913 |
| 7/28/2010 12:22:01 | 23.926 | 11/11/2010 19:05:00 | 29.5 | 7/29/2010 10:06:01 | 24.5913 |
| 7/28/2010 12:42:01 | 23.864 | 11/11/2010 19:40:00 | 29.5 | 7/29/2010 10:26:01 | 24.5293 |
| 7/28/2010 13:02:01 | 23.864 | 11/11/2010 20:15:00 | 29.5 | 7/29/2010 10:46:01 | 24.5293 |
| 7/28/2010 13:22:01 | 23.864 | 11/11/2010 20:50:00 | 29.5 | 7/29/2010 11:06:01 | 24.5293 |
| 7/28/2010 13:42:01 | 23.864 | 11/11/2010 21:25:00 | 29.5 | 7/29/2010 11:26:01 | 24.5293 |
| 7/28/2010 14:02:01 | 23.864 | 11/11/2010 22:00:00 | 29.5 | 7/29/2010 11:46:01 | 24.5293 |
| 7/28/2010 14:22:01 | 23.864 | 11/11/2010 22:35:00 | 29.5 | 7/29/2010 12:06:01 | 24.4663 |
| 7/28/2010 14:42:01 | 23.864 | 11/11/2010 23:10:00 | 29.5 | 7/29/2010 12:26:01 | 24.4663 |
| 7/28/2010 15:02:01 | 23.926 | 11/11/2010 23:45:00 | 29.5 | 7/29/2010 12:46:01 | 24.4663 |
| 7/28/2010 15:22:01 | 23.926 | 11/12/2010 00:20:00 | 29.5 | 7/29/2010 13:06:01 | 24.4663 |
| 7/28/2010 15:42:01 | 23.926 | 11/12/2010 00:55:00 | 29.5 | 7/29/2010 13:26:01 | 24.4663 |
| 7/28/2010 16:02:01 | 23.989 | 11/12/2010 01:30:00 | 29.5 | 7/29/2010 13:46:01 | 24.4663 |
| 7/28/2010 16:22:01 | 23.989 | 11/12/2010 02:05:00 | 29.5 | 7/29/2010 14:06:01 | 24.4663 |
| 7/28/2010 16:42:01 | 24.051 | 11/12/2010 02:40:00 | 29.5 | 7/29/2010 14:26:01 | 24.4043 |
| 7/28/2010 17:02:01 | 24.051 | 11/12/2010 03:15:00 | 29.0 | 7/29/2010 14:46:01 | 24.4043 |
| 7/28/2010 17:22:01 | 24.114 | 11/12/2010 03:50:00 | 29.0 | 7/29/2010 15:06:01 | 24.4043 |
| 7/28/2010 17:42:01 | 24.114 | 11/12/2010 04:25:00 | 29.0 | 7/29/2010 15:26:01 | 24.4043 |
| 7/28/2010 18:02:01 | 24.114 | 11/12/2010 05:00:00 | 29.0 | 7/29/2010 15:46:01 | 24.4043 |
| 7/28/2010 18:22:01 | 24.176 | 11/12/2010 05:35:00 | 29.0 | 7/29/2010 16:06:01 | 24.4043 |
| 7/28/2010 18:42:01 | 24.239 | 11/12/2010 06:10:00 | 29.0 | 7/29/2010 16:26:01 | 24.4043 |
| 7/28/2010 19:02:01 | 24.239 | 11/12/2010 06:45:00 | 29.0 | 7/29/2010 16:46:01 | 24.4043 |
| 7/28/2010 19:22:01 | 24.239 | 11/12/2010 07:20:00 | 29.0 | 7/29/2010 17:06:01 | 24.4043 |
| 7/28/2010 19:42:01 | 24.301 | 11/12/2010 07:55:00 | 29.0 | 7/29/2010 17:26:01 | 24.4043 |
| 7/28/2010 20:02:01 | 24.301 | 11/12/2010 08:30:00 | 28.5 | 7/29/2010 17:46:01 | 24.4043 |
| 7/28/2010 20:22:01 | 24.364 | 11/12/2010 09:05:00 | 28.5 | 7/29/2010 18:06:01 | 24.4043 |

|                    |        |                     |      |                    |         |
|--------------------|--------|---------------------|------|--------------------|---------|
| 7/28/2010 20:42:01 | 24.364 | 11/12/2010 09:40:00 | 28.5 | 7/29/2010 18:26:01 | 24.4043 |
| 7/28/2010 21:02:01 | 24.364 | 11/12/2010 10:15:00 | 28.5 | 7/29/2010 18:46:01 | 24.4043 |
| 7/28/2010 21:22:01 | 24.364 | 11/12/2010 10:50:00 | 28.5 | 7/29/2010 19:06:01 | 24.4043 |
| 7/28/2010 21:42:01 | 24.426 | 11/12/2010 11:25:00 | 28.5 | 7/29/2010 19:26:01 | 24.4043 |
| 7/28/2010 22:02:01 | 24.426 | 11/12/2010 12:00:00 | 28.5 | 7/29/2010 19:46:01 | 24.4043 |
| 7/28/2010 22:22:01 | 24.426 | 11/12/2010 12:35:00 | 28.5 | 7/29/2010 20:06:01 | 24.4043 |
| 7/28/2010 22:42:01 | 24.426 | 11/12/2010 13:10:00 | 28.5 | 7/29/2010 20:26:01 | 24.4043 |
| 7/28/2010 23:02:01 | 24.426 | 11/12/2010 13:45:00 | 29.0 | 7/29/2010 20:46:01 | 24.4663 |
| 7/28/2010 23:22:01 | 24.489 | 11/12/2010 14:20:00 | 29.0 | 7/29/2010 21:06:01 | 24.4663 |
| 7/28/2010 23:42:01 | 24.489 | 11/12/2010 14:55:00 | 29.0 | 7/29/2010 21:26:01 | 24.4663 |
| 7/29/2010 00:02:01 | 24.489 | 11/12/2010 15:30:00 | 29.0 | 7/29/2010 21:46:01 | 24.4663 |
| 7/29/2010 00:22:01 | 24.489 | 11/12/2010 16:05:00 | 29.0 | 7/29/2010 22:06:01 | 24.4663 |
| 7/29/2010 00:42:01 | 24.489 | 11/12/2010 16:40:00 | 29.5 | 7/29/2010 22:26:01 | 24.4663 |
| 7/29/2010 01:02:01 | 24.489 | 11/12/2010 17:15:00 | 29.5 | 7/29/2010 22:46:01 | 24.5293 |
| 7/29/2010 01:22:01 | 24.489 | 11/12/2010 17:50:00 | 29.5 | 7/29/2010 23:06:01 | 24.5293 |
| 7/29/2010 01:42:01 | 24.489 | 11/12/2010 18:25:00 | 29.5 | 7/29/2010 23:26:01 | 24.5293 |
| 7/29/2010 02:02:01 | 24.489 | 11/12/2010 19:00:00 | 29.5 | 7/29/2010 23:46:01 | 24.5293 |
| 7/29/2010 02:22:01 | 24.489 | 11/12/2010 19:35:00 | 29.5 | 7/30/2010 00:06:01 | 24.5293 |
| 7/29/2010 02:42:01 | 24.489 | 11/12/2010 20:10:00 | 29.5 | 7/30/2010 00:26:01 | 24.5293 |
| 7/29/2010 03:02:01 | 24.426 | 11/12/2010 20:45:00 | 29.5 | 7/30/2010 00:46:01 | 24.5293 |
| 7/29/2010 03:22:01 | 24.426 | 11/12/2010 21:20:00 | 29.5 | 7/30/2010 01:06:01 | 24.5293 |
| 7/29/2010 03:42:01 | 24.426 | 11/12/2010 21:55:00 | 29.5 | 7/30/2010 01:26:01 | 24.5293 |
| 7/29/2010 04:02:01 | 24.426 | 11/12/2010 22:30:00 | 29.5 | 7/30/2010 01:46:01 | 24.5293 |
| 7/29/2010 04:22:01 | 24.426 | 11/12/2010 23:05:00 | 29.5 | 7/30/2010 02:06:01 | 24.5293 |
| 7/29/2010 04:42:01 | 24.426 | 11/12/2010 23:40:00 | 29.5 | 7/30/2010 02:26:01 | 24.5293 |
| 7/29/2010 05:02:01 | 24.364 | 11/13/2010 00:15:00 | 29.5 | 7/30/2010 02:46:01 | 24.5293 |
| 7/29/2010 05:22:01 | 24.364 | 11/13/2010 00:50:00 | 29.5 | 7/30/2010 03:06:01 | 24.5293 |
| 7/29/2010 05:42:01 | 24.364 | 11/13/2010 01:25:00 | 29.5 | 7/30/2010 03:26:01 | 24.5293 |
| 7/29/2010 06:02:01 | 24.364 | 11/13/2010 02:00:00 | 29.5 | 7/30/2010 03:46:01 | 24.5293 |
| 7/29/2010 06:22:01 | 24.364 | 11/13/2010 02:35:00 | 29.0 | 7/30/2010 04:06:01 | 24.5293 |
| 7/29/2010 06:42:01 | 24.301 | 11/13/2010 03:10:00 | 29.0 | 7/30/2010 04:26:01 | 24.5293 |
| 7/29/2010 07:02:01 | 24.301 | 11/13/2010 03:45:00 | 29.0 | 7/30/2010 04:46:01 | 24.5293 |
| 7/29/2010 07:22:01 | 24.301 | 11/13/2010 04:20:00 | 29.0 | 7/30/2010 05:06:01 | 24.5293 |
| 7/29/2010 07:42:01 | 24.239 | 11/13/2010 04:55:00 | 29.0 | 7/30/2010 05:26:01 | 24.5293 |
| 7/29/2010 08:02:01 | 24.239 | 11/13/2010 05:30:00 | 29.0 | 7/30/2010 05:46:01 | 24.5293 |
| 7/29/2010 08:22:01 | 24.239 | 11/13/2010 06:05:00 | 29.0 | 7/30/2010 06:06:01 | 24.5293 |
| 7/29/2010 08:42:01 | 24.176 | 11/13/2010 06:40:00 | 29.0 | 7/30/2010 06:26:01 | 24.5293 |
| 7/29/2010 09:02:01 | 24.176 | 11/13/2010 07:15:00 | 28.5 | 7/30/2010 06:46:01 | 24.5293 |
| 7/29/2010 09:22:01 | 24.176 | 11/13/2010 07:50:00 | 28.5 | 7/30/2010 07:06:01 | 24.5293 |
| 7/29/2010 09:42:01 | 24.176 | 11/13/2010 08:25:00 | 28.5 | 7/30/2010 07:26:01 | 24.5293 |
| 7/29/2010 10:02:01 | 24.114 | 11/13/2010 09:00:00 | 28.5 | 7/30/2010 07:46:01 | 24.4663 |
| 7/29/2010 10:22:01 | 24.114 | 11/13/2010 09:35:00 | 28.5 | 7/30/2010 08:06:01 | 24.4663 |
| 7/29/2010 10:42:01 | 24.051 | 11/13/2010 10:10:00 | 28.5 | 7/30/2010 08:26:01 | 24.4663 |
| 7/29/2010 11:02:01 | 24.051 | 11/13/2010 10:45:00 | 28.5 | 7/30/2010 08:46:01 | 24.4663 |
| 7/29/2010 11:22:01 | 24.051 | 11/13/2010 11:20:00 | 28.5 | 7/30/2010 09:06:01 | 24.4663 |
| 7/29/2010 11:42:01 | 23.989 | 11/13/2010 11:55:00 | 28.5 | 7/30/2010 09:26:01 | 24.4663 |
| 7/29/2010 12:02:01 | 23.989 | 11/13/2010 12:30:00 | 28.5 | 7/30/2010 09:46:01 | 24.4663 |
| 7/29/2010 12:22:01 | 23.989 | 11/13/2010 13:05:00 | 28.5 | 7/30/2010 10:06:01 | 24.4043 |
| 7/29/2010 12:42:01 | 23.926 | 11/13/2010 13:40:00 | 28.5 | 7/30/2010 10:26:01 | 24.4043 |
| 7/29/2010 13:02:01 | 23.926 | 11/13/2010 14:15:00 | 28.5 | 7/30/2010 10:46:01 | 24.4043 |

|                    |        |                     |      |                    |         |
|--------------------|--------|---------------------|------|--------------------|---------|
| 7/29/2010 13:22:01 | 23.926 | 11/13/2010 14:50:00 | 29.0 | 7/30/2010 11:06:01 | 24.4043 |
| 7/29/2010 13:42:01 | 23.926 | 11/13/2010 15:25:00 | 29.0 | 7/30/2010 11:26:01 | 24.4043 |
| 7/29/2010 14:02:01 | 23.926 | 11/13/2010 16:00:00 | 29.0 | 7/30/2010 11:46:01 | 24.3413 |
| 7/29/2010 14:22:01 | 23.926 | 11/13/2010 16:35:00 | 30.0 | 7/30/2010 12:06:01 | 24.3413 |
| 7/29/2010 14:42:01 | 23.926 | 11/13/2010 17:10:00 | 30.0 | 7/30/2010 12:26:01 | 24.3413 |
| 7/29/2010 15:02:01 | 23.926 | 11/13/2010 17:45:00 | 30.0 | 7/30/2010 12:46:01 | 24.3413 |
| 7/29/2010 15:22:01 | 23.989 | 11/13/2010 18:20:00 | 29.5 | 7/30/2010 13:06:01 | 24.3413 |
| 7/29/2010 15:42:01 | 23.989 | 11/13/2010 18:55:00 | 29.5 | 7/30/2010 13:26:01 | 24.3413 |
| 7/29/2010 16:02:01 | 23.989 | 11/13/2010 19:30:00 | 29.5 | 7/30/2010 13:46:01 | 24.2793 |
| 7/29/2010 16:22:01 | 24.051 | 11/13/2010 20:05:00 | 29.5 | 7/30/2010 14:06:01 | 24.2793 |
| 7/29/2010 16:42:01 | 24.051 | 11/13/2010 20:40:00 | 29.5 | 7/30/2010 14:26:01 | 24.2793 |
| 7/29/2010 17:02:01 | 24.114 | 11/13/2010 21:15:00 | 29.5 | 7/30/2010 14:46:01 | 24.2793 |
| 7/29/2010 17:22:01 | 24.114 | 11/13/2010 21:50:00 | 29.5 | 7/30/2010 15:06:01 | 24.2793 |
| 7/29/2010 17:42:01 | 24.176 | 11/13/2010 22:25:00 | 29.5 | 7/30/2010 15:26:01 | 24.2793 |
| 7/29/2010 18:02:01 | 24.176 | 11/13/2010 23:00:00 | 29.5 | 7/30/2010 15:46:01 | 24.2793 |
| 7/29/2010 18:22:01 | 24.239 | 11/13/2010 23:35:00 | 29.5 | 7/30/2010 16:06:01 | 24.2793 |
| 7/29/2010 18:42:01 | 24.239 | 11/14/2010 00:10:00 | 29.5 | 7/30/2010 16:26:01 | 24.2163 |
| 7/29/2010 19:02:01 | 24.239 | 11/14/2010 00:45:00 | 29.0 | 7/30/2010 16:46:01 | 24.2163 |
| 7/29/2010 19:22:01 | 24.301 | 11/14/2010 01:20:00 | 29.0 | 7/30/2010 17:06:01 | 24.2163 |
| 7/29/2010 19:42:01 | 24.301 | 11/14/2010 01:55:00 | 29.0 | 7/30/2010 17:26:01 | 24.2163 |
| 7/29/2010 20:02:01 | 24.364 | 11/14/2010 02:30:00 | 29.0 | 7/30/2010 17:46:01 | 24.2163 |
| 7/29/2010 20:22:01 | 24.364 | 11/14/2010 03:05:00 | 29.0 | 7/30/2010 18:06:01 | 24.2793 |
| 7/29/2010 20:42:01 | 24.364 | 11/14/2010 03:40:00 | 29.0 | 7/30/2010 18:26:01 | 24.2793 |
| 7/29/2010 21:02:01 | 24.426 | 11/14/2010 04:15:00 | 29.0 | 7/30/2010 18:46:01 | 24.2793 |
| 7/29/2010 21:22:01 | 24.426 | 11/14/2010 04:50:00 | 29.0 | 7/30/2010 19:06:01 | 24.2793 |
| 7/29/2010 21:42:01 | 24.426 | 11/14/2010 05:25:00 | 29.0 | 7/30/2010 19:26:01 | 24.2793 |
| 7/29/2010 22:02:01 | 24.426 | 11/14/2010 06:00:00 | 28.5 | 7/30/2010 19:46:01 | 24.2793 |
| 7/29/2010 22:22:01 | 24.426 | 11/14/2010 06:35:00 | 28.5 | 7/30/2010 20:06:01 | 24.2793 |
| 7/29/2010 22:42:01 | 24.426 | 11/14/2010 07:10:00 | 28.5 | 7/30/2010 20:26:01 | 24.2793 |
| 7/29/2010 23:02:01 | 24.426 | 11/14/2010 07:45:00 | 28.5 | 7/30/2010 20:46:01 | 24.2793 |
| 7/29/2010 23:22:01 | 24.426 | 11/14/2010 08:20:00 | 28.5 | 7/30/2010 21:06:01 | 24.3413 |
| 7/29/2010 23:42:01 | 24.426 | 11/14/2010 08:55:00 | 28.0 | 7/30/2010 21:26:01 | 24.3413 |
| 7/30/2010 00:02:01 | 24.426 | 11/14/2010 09:30:00 | 28.0 | 7/30/2010 21:46:01 | 24.3413 |
| 7/30/2010 00:22:01 | 24.426 | 11/14/2010 10:05:00 | 28.0 | 7/30/2010 22:06:01 | 24.3413 |
| 7/30/2010 00:42:01 | 24.426 | 11/14/2010 10:40:00 | 28.0 | 7/30/2010 22:26:01 | 24.3413 |
| 7/30/2010 01:02:01 | 24.426 | 11/14/2010 11:15:00 | 28.0 | 7/30/2010 22:46:01 | 24.3413 |
| 7/30/2010 01:22:01 | 24.364 | 11/14/2010 11:50:00 | 28.0 | 7/30/2010 23:06:01 | 24.3413 |
| 7/30/2010 01:42:01 | 24.364 | 11/14/2010 12:25:00 | 28.5 | 7/30/2010 23:26:01 | 24.4043 |
| 7/30/2010 02:02:01 | 24.364 | 11/14/2010 13:00:00 | 28.5 | 7/30/2010 23:46:01 | 24.4043 |
| 7/30/2010 02:22:01 | 24.364 | 11/14/2010 13:35:00 | 30.5 | 7/31/2010 00:06:01 | 24.4043 |
| 7/30/2010 02:42:01 | 24.301 | 11/14/2010 14:10:00 | 31.0 | 7/31/2010 00:26:01 | 24.4043 |
| 7/30/2010 03:02:01 | 24.301 | 11/14/2010 14:45:00 | 30.5 | 7/31/2010 00:46:01 | 24.4043 |
| 7/30/2010 03:22:01 | 24.301 | 11/14/2010 15:20:00 | 30.5 | 7/31/2010 01:06:01 | 24.4043 |
| 7/30/2010 03:42:01 | 24.301 | 11/14/2010 15:55:00 | 30.5 | 7/31/2010 01:26:01 | 24.4043 |
| 7/30/2010 04:02:01 | 24.239 | 11/14/2010 16:30:00 | 30.5 | 7/31/2010 01:46:01 | 24.4043 |
| 7/30/2010 04:22:01 | 24.239 | 11/14/2010 17:05:00 | 30.5 | 7/31/2010 02:06:01 | 24.4043 |
| 7/30/2010 04:42:01 | 24.239 | 11/14/2010 17:40:00 | 31.0 | 7/31/2010 02:26:01 | 24.4043 |
| 7/30/2010 05:02:01 | 24.239 | 11/14/2010 18:15:00 | 31.0 | 7/31/2010 02:46:01 | 24.4043 |
| 7/30/2010 05:22:01 | 24.176 | 11/14/2010 18:50:00 | 31.5 | 7/31/2010 03:06:01 | 24.4043 |
| 7/30/2010 05:42:01 | 24.176 | 11/14/2010 19:25:00 | 31.5 | 7/31/2010 03:26:01 | 24.4663 |

|                    |        |                     |      |                    |         |
|--------------------|--------|---------------------|------|--------------------|---------|
| 7/30/2010 06:02:01 | 24.176 | 11/14/2010 20:00:00 | 32.0 | 7/31/2010 03:46:01 | 24.4043 |
| 7/30/2010 06:22:01 | 24.114 | 11/14/2010 20:35:00 | 32.0 | 7/31/2010 04:06:01 | 24.4043 |
| 7/30/2010 06:42:01 | 24.114 | 11/14/2010 21:10:00 | 32.0 | 7/31/2010 04:26:01 | 24.4043 |
| 7/30/2010 07:02:01 | 24.114 | 11/14/2010 21:45:00 | 31.0 | 7/31/2010 04:46:01 | 24.4043 |
| 7/30/2010 07:22:01 | 24.051 | 11/14/2010 22:20:00 | 31.0 | 7/31/2010 05:06:01 | 24.4043 |
| 7/30/2010 07:42:01 | 24.051 | 11/14/2010 22:55:00 | 31.0 | 7/31/2010 05:26:01 | 24.4043 |
| 7/30/2010 08:02:01 | 24.051 | 11/14/2010 23:30:00 | 32.0 | 7/31/2010 05:46:01 | 24.4043 |
| 7/30/2010 08:22:01 | 23.989 | 11/15/2010 00:05:00 | 31.5 | 7/31/2010 06:06:01 | 24.4043 |
| 7/30/2010 08:42:01 | 23.989 | 11/15/2010 00:40:00 | 31.5 | 7/31/2010 06:26:01 | 24.4043 |
| 7/30/2010 09:02:01 | 23.989 | 11/15/2010 01:15:00 | 32.0 | 7/31/2010 06:46:01 | 24.4043 |
| 7/30/2010 09:22:01 | 23.926 | 11/15/2010 01:50:00 | 32.0 | 7/31/2010 07:06:01 | 24.4043 |
| 7/30/2010 09:42:01 | 23.926 | 11/15/2010 02:25:00 | 32.0 | 7/31/2010 07:26:01 | 24.4043 |
| 7/30/2010 10:02:01 | 23.864 | 11/15/2010 03:00:00 | 32.0 | 7/31/2010 07:46:01 | 24.4043 |
| 7/30/2010 10:22:01 | 23.864 | 11/15/2010 03:35:00 | 32.0 | 7/31/2010 08:06:01 | 24.4043 |
| 7/30/2010 10:42:01 | 23.864 | 11/15/2010 04:10:00 | 32.0 | 7/31/2010 08:26:01 | 24.4043 |
| 7/30/2010 11:02:01 | 23.801 | 11/15/2010 04:45:00 | 32.0 | 7/31/2010 08:46:01 | 24.4043 |
| 7/30/2010 11:22:01 | 23.801 | 11/15/2010 05:20:00 | 31.5 | 7/31/2010 09:06:01 | 24.3413 |
| 7/30/2010 11:42:01 | 23.801 | 11/15/2010 05:55:00 | 31.5 | 7/31/2010 09:26:01 | 24.3413 |
| 7/30/2010 12:02:01 | 23.739 | 11/15/2010 06:30:00 | 31.5 | 7/31/2010 09:46:01 | 24.3413 |
| 7/30/2010 12:22:01 | 23.739 | 11/15/2010 07:05:00 | 31.5 | 7/31/2010 10:06:01 | 24.3413 |
| 7/30/2010 12:42:01 | 23.739 | 11/15/2010 07:40:00 | 31.5 | 7/31/2010 10:26:01 | 24.3413 |
| 7/30/2010 13:02:01 | 23.739 | 11/15/2010 08:15:00 | 31.5 | 7/31/2010 10:46:01 | 24.3413 |
| 7/30/2010 13:22:01 | 23.739 | 11/15/2010 08:50:00 | 31.0 | 7/31/2010 11:06:01 | 24.3413 |
| 7/30/2010 13:42:01 | 23.739 | 11/15/2010 09:25:00 | 31.0 | 7/31/2010 11:26:01 | 24.2793 |
| 7/30/2010 14:02:01 | 23.739 | 11/15/2010 10:00:00 | 31.0 | 7/31/2010 11:46:01 | 24.2793 |
| 7/30/2010 14:22:01 | 23.739 | 11/15/2010 10:35:00 | 31.5 | 7/31/2010 12:06:01 | 24.2793 |
| 7/30/2010 14:42:01 | 23.739 | 11/15/2010 11:10:00 | 31.5 | 7/31/2010 12:26:01 | 24.2793 |
| 7/30/2010 15:02:01 | 23.739 | 11/15/2010 11:45:00 | 31.5 | 7/31/2010 12:46:01 | 24.2793 |
| 7/30/2010 15:22:01 | 23.739 | 11/15/2010 12:20:00 | 31.5 | 7/31/2010 13:06:01 | 24.2163 |
| 7/30/2010 15:42:01 | 23.801 | 11/15/2010 12:55:00 | 31.5 | 7/31/2010 13:26:01 | 24.2163 |
| 7/30/2010 16:02:01 | 23.801 | 11/15/2010 13:30:00 | 31.5 | 7/31/2010 13:46:01 | 24.2163 |
| 7/30/2010 16:22:01 | 23.801 | 11/15/2010 14:05:00 | 31.5 | 7/31/2010 14:06:01 | 24.2163 |
| 7/30/2010 16:42:01 | 23.864 | 11/15/2010 14:40:00 | 32.0 | 7/31/2010 14:26:01 | 24.2163 |
| 7/30/2010 17:02:01 | 23.864 | 11/15/2010 15:15:00 | 32.0 | 7/31/2010 14:46:01 | 24.2163 |
| 7/30/2010 17:22:01 | 23.926 | 11/15/2010 15:50:00 | 32.0 | 7/31/2010 15:06:01 | 24.2163 |
| 7/30/2010 17:42:01 | 23.926 | 11/15/2010 16:25:00 | 32.5 | 7/31/2010 15:26:01 | 24.2163 |
| 7/30/2010 18:02:01 | 23.989 | 11/15/2010 17:00:00 | 32.5 | 7/31/2010 15:46:01 | 24.2163 |
| 7/30/2010 18:22:01 | 23.989 | 11/15/2010 17:35:00 | 32.5 | 7/31/2010 16:06:01 | 24.2163 |
| 7/30/2010 18:42:01 | 23.989 | 11/15/2010 18:10:00 | 32.5 | 7/31/2010 16:26:01 | 24.2163 |
| 7/30/2010 19:02:01 | 24.051 | 11/15/2010 18:45:00 | 33.0 | 7/31/2010 16:46:01 | 24.2163 |
| 7/30/2010 19:22:01 | 24.051 | 11/15/2010 19:20:00 | 33.0 | 7/31/2010 17:06:01 | 24.2163 |
| 7/30/2010 19:42:01 | 24.114 | 11/15/2010 19:55:00 | 32.5 | 7/31/2010 17:26:01 | 24.2163 |
| 7/30/2010 20:02:01 | 24.114 | 11/15/2010 20:30:00 | 33.0 | 7/31/2010 17:46:01 | 24.2163 |
| 7/30/2010 20:22:01 | 24.114 | 11/15/2010 21:05:00 | 33.0 | 7/31/2010 18:06:01 | 24.2163 |
| 7/30/2010 20:42:01 | 24.176 | 11/15/2010 21:40:00 | 32.5 | 7/31/2010 18:26:01 | 24.2163 |
| 7/30/2010 21:02:01 | 24.176 | 11/15/2010 22:15:00 | 32.0 | 7/31/2010 18:46:01 | 24.2163 |
| 7/30/2010 21:22:01 | 24.176 | 11/15/2010 22:50:00 | 32.5 | 7/31/2010 19:06:01 | 24.2163 |
| 7/30/2010 21:42:01 | 24.176 | 11/15/2010 23:25:00 | 32.5 | 7/31/2010 19:26:01 | 24.2163 |
| 7/30/2010 22:02:01 | 24.176 | 11/16/2010 00:00:00 | 33.0 | 7/31/2010 19:46:01 | 24.2793 |
| 7/30/2010 22:22:01 | 24.176 | 11/16/2010 00:35:00 | 33.0 | 7/31/2010 20:06:01 | 24.2793 |

|                    |        |                     |      |                    |         |
|--------------------|--------|---------------------|------|--------------------|---------|
| 7/30/2010 22:42:01 | 24.176 | 11/16/2010 01:10:00 | 34.0 | 7/31/2010 20:26:01 | 24.2793 |
| 7/30/2010 23:02:01 | 24.239 | 11/16/2010 01:45:00 | 34.5 | 7/31/2010 20:46:01 | 24.2793 |
| 7/30/2010 23:22:01 | 24.239 | 11/16/2010 02:20:00 | 34.0 | 7/31/2010 21:06:01 | 24.2793 |
| 7/30/2010 23:42:01 | 24.239 | 11/16/2010 02:55:00 | 34.0 | 7/31/2010 21:26:01 | 24.2793 |
| 7/31/2010 00:02:01 | 24.239 | 11/16/2010 03:30:00 | 34.0 | 7/31/2010 21:46:01 | 24.3413 |
| 7/31/2010 00:22:01 | 24.239 | 11/16/2010 04:05:00 | 34.0 | 7/31/2010 22:06:01 | 24.3413 |
| 7/31/2010 00:42:01 | 24.176 | 11/16/2010 04:40:00 | 34.0 | 7/31/2010 22:26:01 | 24.3413 |
| 7/31/2010 01:02:01 | 24.239 | 11/16/2010 05:15:00 | 33.5 | 7/31/2010 22:46:01 | 24.3413 |
| 7/31/2010 01:22:01 | 24.176 | 11/16/2010 05:50:00 | 33.5 | 7/31/2010 23:06:01 | 24.4043 |
| 7/31/2010 01:42:01 | 24.176 | 11/16/2010 06:25:00 | 33.0 | 7/31/2010 23:26:01 | 24.4043 |
| 7/31/2010 02:02:01 | 24.176 | 11/16/2010 07:00:00 | 32.5 | 7/31/2010 23:46:01 | 24.4043 |
| 7/31/2010 02:22:01 | 24.176 | 11/16/2010 07:35:00 | 32.5 | 8/1/2010 00:06:01  | 24.4043 |
| 7/31/2010 02:42:01 | 24.176 | 11/16/2010 08:10:00 | 32.0 | 8/1/2010 00:26:01  | 24.4043 |
| 7/31/2010 03:02:01 | 24.114 | 11/16/2010 08:45:00 | 32.0 | 8/1/2010 00:46:01  | 24.4043 |
| 7/31/2010 03:22:01 | 24.114 | 11/16/2010 09:20:00 | 32.0 | 8/1/2010 01:06:01  | 24.4043 |
| 7/31/2010 03:42:01 | 24.114 | 11/16/2010 09:55:00 | 31.5 | 8/1/2010 01:26:01  | 24.4043 |
| 7/31/2010 04:02:01 | 24.114 | 11/16/2010 10:30:00 | 31.0 | 8/1/2010 01:46:01  | 24.4663 |
| 7/31/2010 04:22:01 | 24.114 | 11/16/2010 11:05:00 | 31.0 | 8/1/2010 02:06:01  | 24.4663 |
| 7/31/2010 04:42:01 | 24.114 | 11/16/2010 11:40:00 | 31.0 | 8/1/2010 02:26:01  | 24.4663 |
| 7/31/2010 05:02:01 | 24.051 | 11/16/2010 12:15:00 | 31.0 | 8/1/2010 02:46:01  | 24.4663 |
| 7/31/2010 05:22:01 | 24.051 | 11/16/2010 12:50:00 | 31.0 | 8/1/2010 03:06:01  | 24.4663 |
| 7/31/2010 05:42:01 | 24.051 | 11/16/2010 13:25:00 | 31.0 | 8/1/2010 03:26:01  | 24.4663 |
| 7/31/2010 06:02:01 | 24.051 | 11/16/2010 14:00:00 | 31.0 | 8/1/2010 03:46:01  | 24.4663 |
| 7/31/2010 06:22:01 | 23.989 | 11/16/2010 14:35:00 | 31.0 | 8/1/2010 04:06:01  | 24.4663 |
| 7/31/2010 06:42:01 | 23.989 | 11/16/2010 15:10:00 | 31.0 | 8/1/2010 04:26:01  | 24.4663 |
| 7/31/2010 07:02:01 | 23.989 | 11/16/2010 15:45:00 | 31.5 | 8/1/2010 04:46:01  | 24.4663 |
| 7/31/2010 07:22:01 | 23.926 | 11/16/2010 16:20:00 | 31.5 | 8/1/2010 05:06:01  | 24.4663 |
| 7/31/2010 07:42:01 | 23.926 | 11/16/2010 16:55:00 | 32.0 | 8/1/2010 05:26:01  | 24.4663 |
| 7/31/2010 08:02:01 | 23.926 | 11/16/2010 17:30:00 | 32.0 | 8/1/2010 05:46:01  | 24.4663 |
| 7/31/2010 08:22:01 | 23.864 | 11/16/2010 18:05:00 | 32.0 | 8/1/2010 06:06:01  | 24.4663 |
| 7/31/2010 08:42:01 | 23.864 | 11/16/2010 18:40:00 | 32.0 | 8/1/2010 06:26:01  | 24.4663 |
| 7/31/2010 09:02:01 | 23.864 | 11/16/2010 19:15:00 | 32.5 | 8/1/2010 06:46:01  | 24.4663 |
| 7/31/2010 09:22:01 | 23.801 | 11/16/2010 19:50:00 | 33.0 | 8/1/2010 07:06:01  | 24.4663 |
| 7/31/2010 09:42:01 | 23.801 | 11/16/2010 20:25:00 | 33.5 | 8/1/2010 07:26:01  | 24.4663 |
| 7/31/2010 10:02:01 | 23.801 | 11/16/2010 21:00:00 | 34.0 | 8/1/2010 07:46:01  | 24.4663 |
| 7/31/2010 10:22:01 | 23.739 | 11/16/2010 21:35:00 | 34.0 | 8/1/2010 08:06:01  | 24.4663 |
| 7/31/2010 10:42:01 | 23.739 | 11/16/2010 22:10:00 | 34.0 | 8/1/2010 08:26:01  | 24.4663 |
| 7/31/2010 11:02:01 | 23.739 | 11/16/2010 22:45:00 | 34.5 | 8/1/2010 08:46:01  | 24.4663 |
| 7/31/2010 11:22:01 | 23.739 | 11/16/2010 23:20:00 | 34.5 | 8/1/2010 09:06:01  | 24.4663 |
| 7/31/2010 11:42:01 | 23.676 | 11/16/2010 23:55:00 | 34.5 | 8/1/2010 09:26:01  | 24.4043 |
| 7/31/2010 12:02:01 | 23.676 | 11/17/2010 00:30:00 | 34.5 | 8/1/2010 09:46:01  | 24.4043 |
| 7/31/2010 12:22:01 | 23.676 | 11/17/2010 01:05:00 | 34.5 | 8/1/2010 10:06:01  | 24.4043 |
| 7/31/2010 12:42:01 | 23.676 | 11/17/2010 01:40:00 | 35.0 | 8/1/2010 10:26:01  | 24.4043 |
| 7/31/2010 13:02:01 | 23.676 | 11/17/2010 02:15:00 | 34.5 | 8/1/2010 10:46:01  | 24.4043 |
| 7/31/2010 13:22:01 | 23.614 | 11/17/2010 02:50:00 | 34.5 | 8/1/2010 11:06:01  | 24.4043 |
| 7/31/2010 13:42:01 | 23.614 | 11/17/2010 03:25:00 | 34.5 | 8/1/2010 11:26:01  | 24.4043 |
| 7/31/2010 14:02:01 | 23.614 | 11/17/2010 04:00:00 | 34.0 | 8/1/2010 11:46:01  | 24.4043 |
| 7/31/2010 14:22:01 | 23.676 | 11/17/2010 04:35:00 | 34.0 | 8/1/2010 12:06:01  | 24.3413 |
| 7/31/2010 14:42:01 | 23.676 | 11/17/2010 05:10:00 | 34.0 | 8/1/2010 12:26:01  | 24.3413 |
| 7/31/2010 15:02:01 | 23.676 | 11/17/2010 05:45:00 | 34.0 | 8/1/2010 12:46:01  | 24.3413 |

|                    |        |                     |      |                   |         |
|--------------------|--------|---------------------|------|-------------------|---------|
| 7/31/2010 15:22:01 | 23.676 | 11/17/2010 06:20:00 | 33.5 | 8/1/2010 13:06:01 | 24.3413 |
| 7/31/2010 15:42:01 | 23.739 | 11/17/2010 06:55:00 | 33.0 | 8/1/2010 13:26:01 | 24.3413 |
| 7/31/2010 16:02:01 | 23.739 | 11/17/2010 07:30:00 | 33.0 | 8/1/2010 13:46:01 | 24.3413 |
| 7/31/2010 16:22:01 | 23.801 | 11/17/2010 08:05:00 | 33.0 | 8/1/2010 14:06:01 | 24.3413 |
| 7/31/2010 16:42:01 | 23.801 | 11/17/2010 08:40:00 | 33.0 | 8/1/2010 14:26:01 | 24.3413 |
| 7/31/2010 17:02:01 | 23.864 | 11/17/2010 09:15:00 | 33.0 | 8/1/2010 14:46:01 | 24.3413 |
| 7/31/2010 17:22:01 | 23.864 | 11/17/2010 09:50:00 | 33.0 | 8/1/2010 15:06:01 | 24.2793 |
| 7/31/2010 17:42:01 | 23.926 | 11/17/2010 10:25:00 | 32.5 | 8/1/2010 15:26:01 | 24.2793 |
| 7/31/2010 18:02:01 | 23.989 | 11/17/2010 11:00:00 | 32.5 | 8/1/2010 15:46:01 | 24.2793 |
| 7/31/2010 18:22:01 | 23.989 | 11/17/2010 11:35:00 | 32.5 | 8/1/2010 16:06:01 | 24.2793 |
| 7/31/2010 18:42:01 | 24.051 | 11/17/2010 12:10:00 | 32.0 | 8/1/2010 16:26:01 | 24.2793 |
| 7/31/2010 19:02:01 | 24.051 | 11/17/2010 12:45:00 | 32.0 | 8/1/2010 16:46:01 | 24.2793 |
| 7/31/2010 19:22:01 | 24.114 | 11/17/2010 13:20:00 | 32.5 | 8/1/2010 17:06:01 | 24.2793 |
| 7/31/2010 19:42:01 | 24.114 | 11/17/2010 13:55:00 | 32.5 | 8/1/2010 17:26:01 | 24.2793 |
| 7/31/2010 20:02:01 | 24.176 | 11/17/2010 14:30:00 | 32.5 | 8/1/2010 17:46:01 | 24.2793 |
| 7/31/2010 20:22:01 | 24.176 | 11/17/2010 15:05:00 | 32.5 | 8/1/2010 18:06:01 | 24.2793 |
| 7/31/2010 20:42:01 | 24.176 | 11/17/2010 15:40:00 | 32.0 | 8/1/2010 18:26:01 | 24.3413 |
| 7/31/2010 21:02:01 | 24.239 | 11/17/2010 16:15:00 | 32.5 | 8/1/2010 18:46:01 | 24.3413 |
| 7/31/2010 21:22:01 | 24.239 | 11/17/2010 16:50:00 | 32.5 | 8/1/2010 19:06:01 | 24.3413 |
| 7/31/2010 21:42:01 | 24.239 | 11/17/2010 17:25:00 | 32.5 | 8/1/2010 19:26:01 | 24.3413 |
| 7/31/2010 22:02:01 | 24.239 | 11/17/2010 18:00:00 | 32.0 | 8/1/2010 19:46:01 | 24.3413 |
| 7/31/2010 22:22:01 | 24.301 | 11/17/2010 18:35:00 | 32.0 | 8/1/2010 20:06:01 | 24.3413 |
| 7/31/2010 22:42:01 | 24.301 | 11/17/2010 19:10:00 | 32.0 | 8/1/2010 20:26:01 | 24.4043 |
| 7/31/2010 23:02:01 | 24.301 | 11/17/2010 19:45:00 | 32.5 | 8/1/2010 20:46:01 | 24.4043 |
| 7/31/2010 23:22:01 | 24.301 | 11/17/2010 20:20:00 | 33.5 | 8/1/2010 21:06:01 | 24.4043 |
| 7/31/2010 23:42:01 | 24.301 | 11/17/2010 20:55:00 | 34.0 | 8/1/2010 21:26:01 | 24.4043 |
| 8/1/2010 00:02:01  | 24.301 | 11/17/2010 21:30:00 | 34.5 | 8/1/2010 21:46:01 | 24.4043 |
| 8/1/2010 00:22:01  | 24.301 | 11/17/2010 22:05:00 | 34.5 | 8/1/2010 22:06:01 | 24.4663 |
| 8/1/2010 00:42:01  | 24.301 | 11/17/2010 22:40:00 | 34.5 | 8/1/2010 22:26:01 | 24.4663 |
| 8/1/2010 01:02:01  | 24.301 | 11/17/2010 23:15:00 | 34.5 | 8/1/2010 22:46:01 | 24.4663 |
| 8/1/2010 01:22:01  | 24.301 | 11/17/2010 23:50:00 | 34.5 | 8/1/2010 23:06:01 | 24.4663 |
| 8/1/2010 01:42:01  | 24.301 | 11/18/2010 00:25:00 | 35.0 | 8/1/2010 23:26:01 | 24.4663 |
| 8/1/2010 02:02:01  | 24.301 | 11/18/2010 01:00:00 | 35.0 | 8/1/2010 23:46:01 | 24.4663 |
| 8/1/2010 02:22:01  | 24.301 | 11/18/2010 01:35:00 | 35.0 | 8/2/2010 00:06:01 | 24.5293 |
| 8/1/2010 02:42:01  | 24.301 | 11/18/2010 02:10:00 | 34.5 | 8/2/2010 00:26:01 | 24.5293 |
| 8/1/2010 03:02:01  | 24.239 | 11/18/2010 02:45:00 | 34.0 | 8/2/2010 00:46:01 | 24.5293 |
| 8/1/2010 03:22:01  | 24.239 | 11/18/2010 03:20:00 | 34.5 | 8/2/2010 01:06:01 | 24.5293 |
| 8/1/2010 03:42:01  | 24.239 | 11/18/2010 03:55:00 | 34.0 | 8/2/2010 01:26:01 | 24.5293 |
| 8/1/2010 04:02:01  | 24.239 | 11/18/2010 04:30:00 | 34.0 | 8/2/2010 01:46:01 | 24.5293 |
| 8/1/2010 04:22:01  | 24.239 | 11/18/2010 05:05:00 | 34.0 | 8/2/2010 02:06:01 | 24.5293 |
| 8/1/2010 04:42:01  | 24.239 | 11/18/2010 05:40:00 | 34.0 | 8/2/2010 02:26:01 | 24.5293 |
| 8/1/2010 05:02:01  | 24.176 | 11/18/2010 06:15:00 | 33.5 | 8/2/2010 02:46:01 | 24.5293 |
| 8/1/2010 05:22:01  | 24.176 | 11/18/2010 06:50:00 | 33.5 | 8/2/2010 03:06:01 | 24.5913 |
| 8/1/2010 05:42:01  | 24.176 | 11/18/2010 07:25:00 | 33.5 | 8/2/2010 03:26:01 | 24.5913 |
| 8/1/2010 06:02:01  | 24.176 | 11/18/2010 08:00:00 | 34.0 | 8/2/2010 03:46:01 | 24.5913 |
| 8/1/2010 06:22:01  | 24.176 | 11/18/2010 08:35:00 | 34.0 | 8/2/2010 04:06:01 | 24.5913 |
| 8/1/2010 06:42:01  | 24.114 | 11/18/2010 09:10:00 | 34.0 | 8/2/2010 04:26:01 | 24.5913 |
| 8/1/2010 07:02:01  | 24.114 | 11/18/2010 09:45:00 | 34.0 | 8/2/2010 04:46:01 | 24.5913 |
| 8/1/2010 07:22:01  | 24.114 | 11/18/2010 10:20:00 | 34.0 | 8/2/2010 05:06:01 | 24.5913 |
| 8/1/2010 07:42:01  | 24.114 | 11/18/2010 10:55:00 | 34.0 | 8/2/2010 05:26:01 | 24.5913 |

|                   |        |                     |      |                   |         |
|-------------------|--------|---------------------|------|-------------------|---------|
| 8/1/2010 08:02:01 | 24.051 | 11/18/2010 11:30:00 | 34.0 | 8/2/2010 05:46:01 | 24.5913 |
| 8/1/2010 08:22:01 | 24.051 | 11/18/2010 12:05:00 | 33.5 | 8/2/2010 06:06:01 | 24.5913 |
| 8/1/2010 08:42:01 | 24.051 | 11/18/2010 12:40:00 | 33.5 | 8/2/2010 06:26:01 | 24.5913 |
| 8/1/2010 09:02:01 | 23.989 | 11/18/2010 13:15:00 | 33.5 | 8/2/2010 06:46:01 | 24.5913 |
| 8/1/2010 09:22:01 | 23.989 | 11/18/2010 13:50:00 | 33.5 | 8/2/2010 07:06:01 | 24.5913 |
| 8/1/2010 09:42:01 | 23.989 | 11/18/2010 14:25:00 | 33.5 | 8/2/2010 07:26:01 | 24.5913 |
| 8/1/2010 10:02:01 | 23.926 | 11/18/2010 15:00:00 | 34.0 | 8/2/2010 07:46:01 | 24.5293 |
| 8/1/2010 10:22:01 | 23.926 | 11/18/2010 15:35:00 | 33.5 | 8/2/2010 08:06:01 | 24.5293 |
| 8/1/2010 10:42:01 | 23.926 | 11/18/2010 16:10:00 | 34.0 | 8/2/2010 08:26:01 | 24.5293 |
| 8/1/2010 11:02:01 | 23.926 | 11/18/2010 16:45:00 | 34.0 | 8/2/2010 08:46:01 | 24.5293 |
| 8/1/2010 11:22:01 | 23.864 | 11/18/2010 17:20:00 | 34.5 | 8/2/2010 09:06:01 | 24.5293 |
| 8/1/2010 11:42:01 | 23.864 | 11/18/2010 17:55:00 | 34.5 | 8/2/2010 09:26:01 | 24.5293 |
| 8/1/2010 12:02:01 | 23.864 | 11/18/2010 18:30:00 | 34.0 | 8/2/2010 09:46:01 | 24.5293 |
| 8/1/2010 12:22:01 | 23.864 | 11/18/2010 19:05:00 | 34.0 | 8/2/2010 10:06:01 | 24.5293 |
| 8/1/2010 12:42:01 | 23.864 | 11/18/2010 19:40:00 | 34.0 | 8/2/2010 10:26:01 | 24.5293 |
| 8/1/2010 13:02:01 | 23.864 | 11/18/2010 20:15:00 | 34.0 | 8/2/2010 10:46:01 | 24.4663 |
| 8/1/2010 13:22:01 | 23.801 | 11/18/2010 20:50:00 | 34.5 | 8/2/2010 11:06:01 | 24.4663 |
| 8/1/2010 13:42:01 | 23.801 | 11/18/2010 21:25:00 | 34.5 | 8/2/2010 11:26:01 | 24.4663 |
| 8/1/2010 14:02:01 | 23.801 | 11/18/2010 22:00:00 | 34.5 | 8/2/2010 11:46:01 | 24.4663 |
| 8/1/2010 14:22:01 | 23.864 | 11/18/2010 22:35:00 | 35.0 | 8/2/2010 12:06:01 | 24.4663 |
| 8/1/2010 14:42:01 | 23.864 | 11/18/2010 23:10:00 | 35.0 | 8/2/2010 12:26:01 | 24.4663 |
| 8/1/2010 15:02:01 | 23.864 | 11/18/2010 23:45:00 | 34.5 | 8/2/2010 12:46:01 | 24.4043 |
| 8/1/2010 15:22:01 | 23.864 | 11/19/2010 00:20:00 | 34.5 | 8/2/2010 13:06:01 | 24.4043 |
| 8/1/2010 15:42:01 | 23.926 | 11/19/2010 00:55:00 | 35.0 | 8/2/2010 13:26:01 | 24.4043 |
| 8/1/2010 16:02:01 | 23.926 | 11/19/2010 01:30:00 | 35.0 | 8/2/2010 13:46:01 | 24.4043 |
| 8/1/2010 16:22:01 | 23.926 | 11/19/2010 02:05:00 | 35.5 | 8/2/2010 14:06:01 | 24.4043 |
| 8/1/2010 16:42:01 | 23.989 | 11/19/2010 02:40:00 | 35.0 | 8/2/2010 14:26:01 | 24.4043 |
| 8/1/2010 17:02:01 | 23.989 | 11/19/2010 03:15:00 | 35.0 | 8/2/2010 14:46:01 | 24.4043 |
| 8/1/2010 17:22:01 | 24.051 | 11/19/2010 03:50:00 | 35.0 | 8/2/2010 15:06:01 | 24.4043 |
| 8/1/2010 17:42:01 | 24.114 | 11/19/2010 04:25:00 | 35.0 | 8/2/2010 15:26:01 | 24.3413 |
| 8/1/2010 18:02:01 | 24.114 | 11/19/2010 05:00:00 | 34.5 | 8/2/2010 15:46:01 | 24.3413 |
| 8/1/2010 18:22:01 | 24.176 | 11/19/2010 05:35:00 | 34.5 | 8/2/2010 16:06:01 | 24.3413 |
| 8/1/2010 18:42:01 | 24.176 | 11/19/2010 06:10:00 | 34.5 | 8/2/2010 16:26:01 | 24.3413 |
| 8/1/2010 19:02:01 | 24.239 | 11/19/2010 06:45:00 | 34.5 | 8/2/2010 16:46:01 | 24.3413 |
| 8/1/2010 19:22:01 | 24.239 | 11/19/2010 07:20:00 | 34.5 | 8/2/2010 17:06:01 | 24.3413 |
| 8/1/2010 19:42:01 | 24.239 | 11/19/2010 07:55:00 | 34.0 | 8/2/2010 17:26:01 | 24.3413 |
| 8/1/2010 20:02:01 | 24.301 | 11/19/2010 08:30:00 | 34.0 | 8/2/2010 17:46:01 | 24.3413 |
| 8/1/2010 20:22:01 | 24.301 | 11/19/2010 09:05:00 | 34.0 | 8/2/2010 18:06:01 | 24.3413 |
| 8/1/2010 20:42:01 | 24.364 | 11/19/2010 09:40:00 | 34.0 | 8/2/2010 18:26:01 | 24.3413 |
| 8/1/2010 21:02:01 | 24.364 | 11/19/2010 10:15:00 | 34.0 | 8/2/2010 18:46:01 | 24.4043 |
| 8/1/2010 21:22:01 | 24.364 | 11/19/2010 10:50:00 | 34.0 | 8/2/2010 19:06:01 | 24.4043 |
| 8/1/2010 21:42:01 | 24.364 | 11/19/2010 11:25:00 | 34.0 | 8/2/2010 19:26:01 | 24.4043 |
| 8/1/2010 22:02:01 | 24.426 | 11/19/2010 12:00:00 | 34.0 | 8/2/2010 19:46:01 | 24.4043 |
| 8/1/2010 22:22:01 | 24.426 | 11/19/2010 12:35:00 | 34.0 | 8/2/2010 20:06:01 | 24.4043 |
| 8/1/2010 22:42:01 | 24.426 | 11/19/2010 13:10:00 | 34.0 | 8/2/2010 20:26:01 | 24.4043 |
| 8/1/2010 23:02:01 | 24.426 | 11/19/2010 13:45:00 | 34.0 | 8/2/2010 20:46:01 | 24.4043 |
| 8/1/2010 23:22:01 | 24.426 | 11/19/2010 14:20:00 | 34.0 | 8/2/2010 21:06:01 | 24.4663 |
| 8/1/2010 23:42:01 | 24.426 | 11/19/2010 14:55:00 | 34.0 | 8/2/2010 21:26:01 | 24.4663 |
| 8/2/2010 00:02:01 | 24.426 | 11/19/2010 15:30:00 | 33.5 | 8/2/2010 21:46:01 | 24.4663 |
| 8/2/2010 00:22:01 | 24.426 | 11/19/2010 16:05:00 | 33.0 | 8/2/2010 22:06:01 | 24.4663 |

|                   |        |                     |      |                   |         |
|-------------------|--------|---------------------|------|-------------------|---------|
| 8/2/2010 00:42:01 | 24.426 | 11/19/2010 16:40:00 | 33.0 | 8/2/2010 22:26:01 | 24.4663 |
| 8/2/2010 01:02:01 | 24.426 | 11/19/2010 17:15:00 | 33.0 | 8/2/2010 22:46:01 | 24.4663 |
| 8/2/2010 01:22:01 | 24.426 | 11/19/2010 17:50:00 | 33.0 | 8/2/2010 23:06:01 | 24.5293 |
| 8/2/2010 01:42:01 | 24.426 | 11/19/2010 18:25:00 | 32.5 | 8/2/2010 23:26:01 | 24.5293 |
| 8/2/2010 02:02:01 | 24.426 | 11/19/2010 19:00:00 | 32.5 | 8/2/2010 23:46:01 | 24.5293 |
| 8/2/2010 02:22:01 | 24.426 | 11/19/2010 19:35:00 | 33.0 | 8/3/2010 00:06:01 | 24.5293 |
| 8/2/2010 02:42:01 | 24.426 | 11/19/2010 20:10:00 | 33.0 | 8/3/2010 00:26:01 | 24.5293 |
| 8/2/2010 03:02:01 | 24.426 | 11/19/2010 20:45:00 | 33.0 | 8/3/2010 00:46:01 | 24.5293 |
| 8/2/2010 03:22:01 | 24.364 | 11/19/2010 21:20:00 | 33.5 | 8/3/2010 01:06:01 | 24.5293 |
| 8/2/2010 03:42:01 | 24.364 | 11/19/2010 21:55:00 | 33.5 | 8/3/2010 01:26:01 | 24.5293 |
| 8/2/2010 04:02:01 | 24.364 | 11/19/2010 22:30:00 | 34.0 | 8/3/2010 01:46:01 | 24.5913 |
| 8/2/2010 04:22:01 | 24.364 | 11/19/2010 23:05:00 | 34.0 | 8/3/2010 02:06:01 | 24.5913 |
| 8/2/2010 04:42:01 | 24.364 | 11/19/2010 23:40:00 | 34.0 | 8/3/2010 02:26:01 | 24.5913 |
| 8/2/2010 05:02:01 | 24.364 | 11/20/2010 00:15:00 | 34.5 | 8/3/2010 02:46:01 | 24.5913 |
| 8/2/2010 05:22:01 | 24.301 | 11/20/2010 00:50:00 | 34.5 | 8/3/2010 03:06:01 | 24.5913 |
| 8/2/2010 05:42:01 | 24.301 | 11/20/2010 01:25:00 | 35.0 | 8/3/2010 03:26:01 | 24.5913 |
| 8/2/2010 06:02:01 | 24.301 | 11/20/2010 02:00:00 | 35.5 | 8/3/2010 03:46:01 | 24.5913 |
| 8/2/2010 06:22:01 | 24.301 | 11/20/2010 02:35:00 | 35.0 | 8/3/2010 04:06:01 | 24.5913 |
| 8/2/2010 06:42:01 | 24.239 | 11/20/2010 03:10:00 | 35.0 | 8/3/2010 04:26:01 | 24.5913 |
| 8/2/2010 07:02:01 | 24.239 | 11/20/2010 03:45:00 | 35.0 | 8/3/2010 04:46:01 | 24.5913 |
| 8/2/2010 07:22:01 | 24.239 | 11/20/2010 04:20:00 | 34.5 | 8/3/2010 05:06:01 | 24.5913 |
| 8/2/2010 07:42:01 | 24.239 | 11/20/2010 04:55:00 | 34.5 | 8/3/2010 05:26:01 | 24.5913 |
| 8/2/2010 08:02:01 | 24.176 | 11/20/2010 05:30:00 | 34.5 | 8/3/2010 05:46:01 | 24.5913 |
| 8/2/2010 08:22:01 | 24.176 | 11/20/2010 06:05:00 | 34.0 | 8/3/2010 06:06:01 | 24.5913 |
| 8/2/2010 08:42:01 | 24.176 | 11/20/2010 06:40:00 | 34.0 | 8/3/2010 06:26:01 | 24.5913 |
| 8/2/2010 09:02:01 | 24.176 | 11/20/2010 07:15:00 | 34.0 | 8/3/2010 06:46:01 | 24.5913 |
| 8/2/2010 09:22:01 | 24.114 | 11/20/2010 07:50:00 | 34.0 | 8/3/2010 07:06:01 | 24.5293 |
| 8/2/2010 09:42:01 | 24.114 | 11/20/2010 08:25:00 | 34.0 | 8/3/2010 07:26:01 | 24.5293 |
| 8/2/2010 10:02:01 | 24.114 | 11/20/2010 09:00:00 | 34.0 | 8/3/2010 07:46:01 | 24.5293 |
| 8/2/2010 10:22:01 | 24.051 | 11/20/2010 09:35:00 | 34.0 | 8/3/2010 08:06:01 | 24.5293 |
| 8/2/2010 10:42:01 | 24.051 | 11/20/2010 10:10:00 | 34.0 | 8/3/2010 08:26:01 | 24.5293 |
| 8/2/2010 11:02:01 | 24.051 | 11/20/2010 10:45:00 | 34.0 | 8/3/2010 08:46:01 | 24.5293 |
| 8/2/2010 11:22:01 | 24.051 | 11/20/2010 11:20:00 | 33.5 | 8/3/2010 09:06:01 | 24.5293 |
| 8/2/2010 11:42:01 | 23.989 | 11/20/2010 11:55:00 | 33.5 | 8/3/2010 09:26:01 | 24.5293 |
| 8/2/2010 12:02:01 | 23.989 | 11/20/2010 12:30:00 | 33.5 | 8/3/2010 09:46:01 | 24.4663 |
| 8/2/2010 12:22:01 | 23.989 | 11/20/2010 13:05:00 | 33.0 | 8/3/2010 10:06:01 | 24.4663 |
| 8/2/2010 12:42:01 | 23.989 | 11/20/2010 13:40:00 | 33.0 | 8/3/2010 10:26:01 | 24.4663 |
| 8/2/2010 13:02:01 | 23.989 | 11/20/2010 14:15:00 | 33.0 | 8/3/2010 10:46:01 | 24.4663 |
| 8/2/2010 13:22:01 | 23.989 | 11/20/2010 14:50:00 | 33.0 | 8/3/2010 11:06:01 | 24.4663 |
| 8/2/2010 13:42:01 | 23.926 | 11/20/2010 15:25:00 | 33.5 | 8/3/2010 11:26:01 | 24.4043 |
| 8/2/2010 14:02:01 | 23.989 | 11/20/2010 16:00:00 | 33.5 | 8/3/2010 11:46:01 | 24.4043 |
| 8/2/2010 14:22:01 | 23.989 | 11/20/2010 16:35:00 | 34.0 | 8/3/2010 12:06:01 | 24.4043 |
| 8/2/2010 14:42:01 | 23.989 | 11/20/2010 17:10:00 | 34.0 | 8/3/2010 12:26:01 | 24.4043 |
| 8/2/2010 15:02:01 | 23.989 | 11/20/2010 17:45:00 | 33.5 | 8/3/2010 12:46:01 | 24.4043 |
| 8/2/2010 15:22:01 | 23.989 | 11/20/2010 18:20:00 | 33.5 | 8/3/2010 13:06:01 | 24.3413 |
| 8/2/2010 15:42:01 | 24.051 | 11/20/2010 18:55:00 | 33.5 | 8/3/2010 13:26:01 | 24.3413 |
| 8/2/2010 16:02:01 | 24.051 | 11/20/2010 19:30:00 | 34.0 | 8/3/2010 13:46:01 | 24.3413 |
| 8/2/2010 16:22:01 | 24.114 | 11/20/2010 20:05:00 | 34.0 | 8/3/2010 14:06:01 | 24.3413 |
| 8/2/2010 16:42:01 | 24.114 | 11/20/2010 20:40:00 | 34.0 | 8/3/2010 14:26:01 | 24.3413 |
| 8/2/2010 17:02:01 | 24.176 | 11/20/2010 21:15:00 | 34.5 | 8/3/2010 14:46:01 | 24.3413 |



|                   |        |                     |      |                   |         |
|-------------------|--------|---------------------|------|-------------------|---------|
| 8/2/2010 17:22:01 | 24.176 | 11/20/2010 21:50:00 | 34.5 | 8/3/2010 15:06:01 | 24.2793 |
| 8/2/2010 17:42:01 | 24.239 | 11/20/2010 22:25:00 | 35.0 | 8/3/2010 15:26:01 | 24.2793 |
| 8/2/2010 18:02:01 | 24.239 | 11/20/2010 23:00:00 | 35.0 | 8/3/2010 15:46:01 | 24.2793 |
| 8/2/2010 18:22:01 | 24.301 | 11/20/2010 23:35:00 | 35.0 | 8/3/2010 16:06:01 | 24.2793 |
| 8/2/2010 18:42:01 | 24.301 | 11/21/2010 00:10:00 | 35.0 | 8/3/2010 16:26:01 | 24.2793 |
| 8/2/2010 19:02:01 | 24.364 | 11/21/2010 00:45:00 | 35.0 | 8/3/2010 16:46:01 | 24.2793 |
| 8/2/2010 19:22:01 | 24.364 | 11/21/2010 01:20:00 | 34.5 | 8/3/2010 17:06:01 | 24.2793 |
| 8/2/2010 19:42:01 | 24.426 | 11/21/2010 01:55:00 | 35.0 | 8/3/2010 17:26:01 | 24.2793 |
| 8/2/2010 20:02:01 | 24.426 | 11/21/2010 02:30:00 | 35.0 | 8/3/2010 17:46:01 | 24.2793 |
| 8/2/2010 20:22:01 | 24.426 | 11/21/2010 03:05:00 | 34.5 | 8/3/2010 18:06:01 | 24.2793 |
| 8/2/2010 20:42:01 | 24.489 | 11/21/2010 03:40:00 | 35.0 | 8/3/2010 18:26:01 | 24.2793 |
| 8/2/2010 21:02:01 | 24.489 | 11/21/2010 04:15:00 | 35.0 | 8/3/2010 18:46:01 | 24.2793 |
| 8/2/2010 21:22:01 | 24.489 | 11/21/2010 04:50:00 | 35.0 | 8/3/2010 19:06:01 | 24.2793 |
| 8/2/2010 21:42:01 | 24.489 | 11/21/2010 05:25:00 | 34.5 | 8/3/2010 19:26:01 | 24.2793 |
| 8/2/2010 22:02:01 | 24.551 | 11/21/2010 06:00:00 | 34.5 | 8/3/2010 19:46:01 | 24.3413 |
| 8/2/2010 22:22:01 | 24.551 | 11/21/2010 06:35:00 | 34.5 | 8/3/2010 20:06:01 | 24.3413 |
| 8/2/2010 22:42:01 | 24.551 | 11/21/2010 07:10:00 | 34.0 | 8/3/2010 20:26:01 | 24.3413 |
| 8/2/2010 23:02:01 | 24.551 | 11/21/2010 07:45:00 | 33.5 | 8/3/2010 20:46:01 | 24.3413 |
| 8/2/2010 23:22:01 | 24.551 | 11/21/2010 08:20:00 | 33.5 | 8/3/2010 21:06:01 | 24.3413 |
| 8/2/2010 23:42:01 | 24.551 | 11/21/2010 08:55:00 | 33.0 | 8/3/2010 21:26:01 | 24.3413 |
| 8/3/2010 00:02:01 | 24.551 | 11/21/2010 09:30:00 | 33.5 | 8/3/2010 21:46:01 | 24.3413 |
| 8/3/2010 00:22:01 | 24.551 | 11/21/2010 10:05:00 | 33.5 | 8/3/2010 22:06:01 | 24.4043 |
| 8/3/2010 00:42:01 | 24.551 | 11/21/2010 10:40:00 | 33.5 | 8/3/2010 22:26:01 | 24.4043 |
| 8/3/2010 01:02:01 | 24.551 | 11/21/2010 11:15:00 | 34.0 | 8/3/2010 22:46:01 | 24.4043 |
| 8/3/2010 01:22:01 | 24.551 | 11/21/2010 11:50:00 | 34.0 | 8/3/2010 23:06:01 | 24.4043 |
| 8/3/2010 01:42:01 | 24.551 | 11/21/2010 12:25:00 | 34.0 | 8/3/2010 23:26:01 | 24.4043 |
| 8/3/2010 02:02:01 | 24.551 | 11/21/2010 13:00:00 | 33.5 | 8/3/2010 23:46:01 | 24.4043 |
| 8/3/2010 02:22:01 | 24.489 | 11/21/2010 13:35:00 | 34.0 | 8/4/2010 00:06:01 | 24.4043 |
| 8/3/2010 02:42:01 | 24.489 | 11/21/2010 14:10:00 | 34.0 | 8/4/2010 00:26:01 | 24.4663 |
| 8/3/2010 03:02:01 | 24.489 | 11/21/2010 14:45:00 | 34.0 | 8/4/2010 00:46:01 | 24.4663 |
| 8/3/2010 03:22:01 | 24.489 | 11/21/2010 15:20:00 | 34.0 | 8/4/2010 01:06:01 | 24.4663 |
| 8/3/2010 03:42:01 | 24.489 | 11/21/2010 15:55:00 | 34.0 | 8/4/2010 01:26:01 | 24.4663 |
| 8/3/2010 04:02:01 | 24.426 | 11/21/2010 16:30:00 | 34.0 | 8/4/2010 01:46:01 | 24.4663 |
| 8/3/2010 04:22:01 | 24.426 | 11/21/2010 17:05:00 | 33.5 | 8/4/2010 02:06:01 | 24.4663 |
| 8/3/2010 04:42:01 | 24.426 | 11/21/2010 17:40:00 | 33.5 | 8/4/2010 02:26:01 | 24.4663 |
| 8/3/2010 05:02:01 | 24.426 | 11/21/2010 18:15:00 | 33.5 | 8/4/2010 02:46:01 | 24.4663 |
| 8/3/2010 05:22:01 | 24.364 | 11/21/2010 18:50:00 | 33.5 | 8/4/2010 03:06:01 | 24.4663 |
| 8/3/2010 05:42:01 | 24.364 | 11/21/2010 19:25:00 | 34.0 | 8/4/2010 03:26:01 | 24.4663 |
| 8/3/2010 06:02:01 | 24.364 | 11/21/2010 20:00:00 | 34.5 | 8/4/2010 03:46:01 | 24.4663 |
| 8/3/2010 06:22:01 | 24.364 | 11/21/2010 20:35:00 | 34.5 | 8/4/2010 04:06:01 | 24.4663 |
| 8/3/2010 06:42:01 | 24.301 | 11/21/2010 21:10:00 | 34.5 | 8/4/2010 04:26:01 | 24.4663 |
| 8/3/2010 07:02:01 | 24.301 | 11/21/2010 21:45:00 | 35.0 | 8/4/2010 04:46:01 | 24.4663 |
| 8/3/2010 07:22:01 | 24.301 | 11/21/2010 22:20:00 | 34.5 | 8/4/2010 05:06:01 | 24.4663 |
| 8/3/2010 07:42:01 | 24.239 | 11/21/2010 22:55:00 | 34.5 | 8/4/2010 05:26:01 | 24.4663 |
| 8/3/2010 08:02:01 | 24.239 | 11/21/2010 23:30:00 | 35.5 | 8/4/2010 05:46:01 | 24.4663 |
| 8/3/2010 08:22:01 | 24.239 | 11/22/2010 00:05:00 | 35.0 | 8/4/2010 06:06:01 | 24.4663 |
| 8/3/2010 08:42:01 | 24.176 | 11/22/2010 00:40:00 | 34.5 | 8/4/2010 06:26:01 | 24.4663 |
| 8/3/2010 09:02:01 | 24.176 | 11/22/2010 01:15:00 | 35.0 | 8/4/2010 06:46:01 | 24.4663 |
| 8/3/2010 09:22:01 | 24.176 | 11/22/2010 01:50:00 | 35.0 | 8/4/2010 07:06:01 | 24.4663 |
| 8/3/2010 09:42:01 | 24.114 | 11/22/2010 02:25:00 | 34.5 | 8/4/2010 07:26:01 | 24.4663 |

|                   |        |                     |      |                   |         |
|-------------------|--------|---------------------|------|-------------------|---------|
| 8/3/2010 10:02:01 | 24.114 | 11/22/2010 03:00:00 | 34.5 | 8/4/2010 07:46:01 | 24.4043 |
| 8/3/2010 10:22:01 | 24.114 | 11/22/2010 03:35:00 | 34.0 | 8/4/2010 08:06:01 | 24.4043 |
| 8/3/2010 10:42:01 | 24.051 | 11/22/2010 04:10:00 | 34.0 | 8/4/2010 08:26:01 | 24.4043 |
| 8/3/2010 11:02:01 | 24.051 | 11/22/2010 04:45:00 | 34.0 | 8/4/2010 08:46:01 | 24.4043 |
| 8/3/2010 11:22:01 | 24.051 | 11/22/2010 05:20:00 | 33.5 | 8/4/2010 09:06:01 | 24.4043 |
| 8/3/2010 11:42:01 | 23.989 | 11/22/2010 05:55:00 | 34.0 | 8/4/2010 09:26:01 | 24.4043 |
| 8/3/2010 12:02:01 | 23.989 | 11/22/2010 06:30:00 | 33.5 | 8/4/2010 09:46:01 | 24.4043 |
| 8/3/2010 12:22:01 | 23.989 | 11/22/2010 07:05:00 | 33.0 | 8/4/2010 10:06:01 | 24.3413 |
| 8/3/2010 12:42:01 | 23.989 | 11/22/2010 07:40:00 | 33.0 | 8/4/2010 10:26:01 | 24.3413 |
| 8/3/2010 13:02:01 | 23.926 | 11/22/2010 08:15:00 | 33.0 | 8/4/2010 10:46:01 | 24.3413 |
| 8/3/2010 13:22:01 | 23.926 | 11/22/2010 08:50:00 | 33.0 | 8/4/2010 11:06:01 | 24.3413 |
| 8/3/2010 13:42:01 | 23.926 | 11/22/2010 09:25:00 | 33.5 | 8/4/2010 11:26:01 | 24.3413 |
| 8/3/2010 14:02:01 | 23.926 | 11/22/2010 10:00:00 | 33.0 | 8/4/2010 11:46:01 | 24.2793 |
| 8/3/2010 14:22:01 | 23.926 | 11/22/2010 10:35:00 | 33.0 | 8/4/2010 12:06:01 | 24.2793 |
| 8/3/2010 14:42:01 | 23.926 | 11/22/2010 11:10:00 | 32.5 | 8/4/2010 12:26:01 | 24.2793 |
| 8/3/2010 15:02:01 | 23.926 | 11/22/2010 11:45:00 | 32.5 | 8/4/2010 12:46:01 | 24.2793 |
| 8/3/2010 15:22:01 | 23.989 | 11/22/2010 12:20:00 | 32.5 | 8/4/2010 13:06:01 | 24.2163 |
| 8/3/2010 15:42:01 | 23.989 | 11/22/2010 12:55:00 | 32.5 | 8/4/2010 13:26:01 | 24.2163 |
| 8/3/2010 16:02:01 | 24.051 | 11/22/2010 13:30:00 | 32.5 | 8/4/2010 13:46:01 | 24.2163 |
| 8/3/2010 16:22:01 | 24.051 | 11/22/2010 14:05:00 | 33.0 | 8/4/2010 14:06:01 | 24.2163 |
| 8/3/2010 16:42:01 | 24.051 | 11/22/2010 14:40:00 | 33.5 | 8/4/2010 14:26:01 | 24.2163 |
| 8/3/2010 17:02:01 | 24.114 | 11/22/2010 15:15:00 | 33.5 | 8/4/2010 14:46:01 | 24.2163 |
| 8/3/2010 17:22:01 | 24.114 | 11/22/2010 15:50:00 | 33.0 | 8/4/2010 15:06:01 | 24.1543 |
| 8/3/2010 17:42:01 | 24.176 | 11/22/2010 16:25:00 | 33.0 | 8/4/2010 15:26:01 | 24.1543 |
| 8/3/2010 18:02:01 | 24.176 | 11/22/2010 17:00:00 | 33.0 | 8/4/2010 15:46:01 | 24.1543 |
| 8/3/2010 18:22:01 | 24.239 | 11/22/2010 17:35:00 | 33.0 | 8/4/2010 16:06:01 | 24.1543 |
| 8/3/2010 18:42:01 | 24.239 | 11/22/2010 18:10:00 | 33.0 | 8/4/2010 16:26:01 | 24.1543 |
| 8/3/2010 19:02:01 | 24.301 | 11/22/2010 18:45:00 | 33.0 | 8/4/2010 16:46:01 | 24.1543 |
| 8/3/2010 19:22:01 | 24.301 | 11/22/2010 19:20:00 | 33.5 | 8/4/2010 17:06:01 | 24.1543 |
| 8/3/2010 19:42:01 | 24.364 | 11/22/2010 19:55:00 | 34.0 | 8/4/2010 17:26:01 | 24.1543 |
| 8/3/2010 20:02:01 | 24.364 | 11/22/2010 20:30:00 | 35.0 | 8/4/2010 17:46:01 | 24.1543 |
| 8/3/2010 20:22:01 | 24.364 | 11/22/2010 21:05:00 | 35.0 | 8/4/2010 18:06:01 | 24.1543 |
| 8/3/2010 20:42:01 | 24.426 | 11/22/2010 21:40:00 | 35.0 | 8/4/2010 18:26:01 | 24.1543 |
| 8/3/2010 21:02:01 | 24.426 | 11/22/2010 22:15:00 | 35.0 | 8/4/2010 18:46:01 | 24.1543 |
| 8/3/2010 21:22:01 | 24.426 | 11/22/2010 22:50:00 | 35.0 | 8/4/2010 19:06:01 | 24.1543 |
| 8/3/2010 21:42:01 | 24.426 | 11/22/2010 23:25:00 | 35.0 | 8/4/2010 19:26:01 | 24.2163 |
| 8/3/2010 22:02:01 | 24.489 | 11/23/2010 00:00:00 | 34.5 | 8/4/2010 19:46:01 | 24.2163 |
| 8/3/2010 22:22:01 | 24.489 | 11/23/2010 00:35:00 | 34.5 | 8/4/2010 20:06:01 | 24.2163 |
| 8/3/2010 22:42:01 | 24.489 | 11/23/2010 01:10:00 | 35.0 | 8/4/2010 20:26:01 | 24.2163 |
| 8/3/2010 23:02:01 | 24.489 | 11/23/2010 01:45:00 | 35.0 | 8/4/2010 20:46:01 | 24.2163 |
| 8/3/2010 23:22:01 | 24.489 | 11/23/2010 02:20:00 | 34.5 | 8/4/2010 21:06:01 | 24.2163 |
| 8/3/2010 23:42:01 | 24.489 | 11/23/2010 02:55:00 | 35.0 | 8/4/2010 21:26:01 | 24.2163 |
| 8/4/2010 00:02:01 | 24.489 | 11/23/2010 03:30:00 | 34.5 | 8/4/2010 21:46:01 | 24.2793 |
| 8/4/2010 00:22:01 | 24.489 | 11/23/2010 04:05:00 | 34.0 | 8/4/2010 22:06:01 | 24.2793 |
| 8/4/2010 00:42:01 | 24.489 | 11/23/2010 04:40:00 | 34.0 | 8/4/2010 22:26:01 | 24.2793 |
| 8/4/2010 01:02:01 | 24.489 | 11/23/2010 05:15:00 | 34.0 | 8/4/2010 22:46:01 | 24.2793 |
| 8/4/2010 01:22:01 | 24.489 | 11/23/2010 05:50:00 | 34.0 | 8/4/2010 23:06:01 | 24.2793 |
| 8/4/2010 01:42:01 | 24.426 | 11/23/2010 06:25:00 | 33.5 | 8/4/2010 23:26:01 | 24.2793 |
| 8/4/2010 02:02:01 | 24.426 | 11/23/2010 07:00:00 | 33.5 | 8/4/2010 23:46:01 | 24.2793 |
| 8/4/2010 02:22:01 | 24.426 | 11/23/2010 07:35:00 | 33.0 | 8/5/2010 00:06:01 | 24.3413 |

|                   |        |                     |      |                   |         |
|-------------------|--------|---------------------|------|-------------------|---------|
| 8/4/2010 02:42:01 | 24.426 | 11/23/2010 08:10:00 | 33.0 | 8/5/2010 00:26:01 | 24.3413 |
| 8/4/2010 03:02:01 | 24.426 | 11/23/2010 08:45:00 | 33.5 | 8/5/2010 00:46:01 | 24.3413 |
| 8/4/2010 03:22:01 | 24.426 | 11/23/2010 09:20:00 | 33.5 | 8/5/2010 01:06:01 | 24.3413 |
| 8/4/2010 03:42:01 | 24.364 | 11/23/2010 09:55:00 | 34.0 | 8/5/2010 01:26:01 | 24.3413 |
| 8/4/2010 04:02:01 | 24.364 | 11/23/2010 10:30:00 | 34.0 | 8/5/2010 01:46:01 | 24.3413 |
| 8/4/2010 04:22:01 | 24.364 | 11/23/2010 11:05:00 | 34.0 | 8/5/2010 02:06:01 | 24.3413 |
| 8/4/2010 04:42:01 | 24.364 | 11/23/2010 11:40:00 | 34.0 | 8/5/2010 02:26:01 | 24.3413 |
| 8/4/2010 05:02:01 | 24.301 | 11/23/2010 12:15:00 | 34.0 | 8/5/2010 02:46:01 | 24.3413 |
| 8/4/2010 05:22:01 | 24.301 | 11/23/2010 12:50:00 | 34.5 | 8/5/2010 03:06:01 | 24.3413 |
| 8/4/2010 05:42:01 | 24.301 | 11/23/2010 13:25:00 | 34.5 | 8/5/2010 03:26:01 | 24.3413 |
| 8/4/2010 06:02:01 | 24.239 | 11/23/2010 14:00:00 | 34.0 | 8/5/2010 03:46:01 | 24.4043 |
| 8/4/2010 06:22:01 | 24.239 | 11/23/2010 14:35:00 | 34.0 | 8/5/2010 04:06:01 | 24.3413 |
| 8/4/2010 06:42:01 | 24.239 | 11/23/2010 15:10:00 | 34.0 | 8/5/2010 04:26:01 | 24.4043 |
| 8/4/2010 07:02:01 | 24.176 | 11/23/2010 15:45:00 | 33.5 | 8/5/2010 04:46:01 | 24.4043 |
| 8/4/2010 07:22:01 | 24.176 | 11/23/2010 16:20:00 | 33.5 | 8/5/2010 05:06:01 | 24.3413 |
| 8/4/2010 07:42:01 | 24.176 | 11/23/2010 16:55:00 | 33.5 | 8/5/2010 05:26:01 | 24.4043 |
| 8/4/2010 08:02:01 | 24.114 | 11/23/2010 17:30:00 | 33.5 | 8/5/2010 05:46:01 | 24.3413 |
| 8/4/2010 08:22:01 | 24.114 | 11/23/2010 18:05:00 | 33.5 | 8/5/2010 06:06:01 | 24.3413 |
| 8/4/2010 08:42:01 | 24.114 | 11/23/2010 18:40:00 | 33.5 | 8/5/2010 06:26:01 | 24.3413 |
| 8/4/2010 09:02:01 | 24.051 | 11/23/2010 19:15:00 | 34.0 | 8/5/2010 06:46:01 | 24.3413 |
| 8/4/2010 09:22:01 | 24.051 | 11/23/2010 19:50:00 | 34.0 | 8/5/2010 07:06:01 | 24.3413 |
| 8/4/2010 09:42:01 | 24.051 | 11/23/2010 20:25:00 | 34.5 | 8/5/2010 07:26:01 | 24.3413 |
| 8/4/2010 10:02:01 | 23.989 | 11/23/2010 21:00:00 | 34.5 | 8/5/2010 07:46:01 | 24.3413 |
| 8/4/2010 10:22:01 | 23.989 | 11/23/2010 21:35:00 | 35.0 | 8/5/2010 08:06:01 | 24.3413 |
| 8/4/2010 10:42:01 | 23.989 | 11/23/2010 22:10:00 | 34.5 | 8/5/2010 08:26:01 | 24.3413 |
| 8/4/2010 11:02:01 | 23.926 | 11/23/2010 22:45:00 | 34.5 | 8/5/2010 08:46:01 | 24.3413 |
| 8/4/2010 11:22:01 | 23.926 | 11/23/2010 23:20:00 | 35.0 | 8/5/2010 09:06:01 | 24.3413 |
| 8/4/2010 11:42:01 | 23.926 | 11/23/2010 23:55:00 | 35.0 | 8/5/2010 09:26:01 | 24.2793 |
| 8/4/2010 12:02:01 | 23.864 | 11/24/2010 00:30:00 | 34.5 | 8/5/2010 09:46:01 | 24.2793 |
| 8/4/2010 12:22:01 | 23.864 | 11/24/2010 01:05:00 | 35.0 | 8/5/2010 10:06:01 | 24.2793 |
| 8/4/2010 12:42:01 | 23.864 | 11/24/2010 01:40:00 | 34.5 | 8/5/2010 10:26:01 | 24.2793 |
| 8/4/2010 13:02:01 | 23.864 | 11/24/2010 02:15:00 | 35.0 | 8/5/2010 10:46:01 | 24.2793 |
| 8/4/2010 13:22:01 | 23.864 | 11/24/2010 02:50:00 | 35.0 | 8/5/2010 11:06:01 | 24.2793 |
| 8/4/2010 13:42:01 | 23.864 | 11/24/2010 03:25:00 | 35.0 | 8/5/2010 11:26:01 | 24.2163 |
| 8/4/2010 14:02:01 | 23.801 | 11/24/2010 04:00:00 | 34.5 | 8/5/2010 11:46:01 | 24.2163 |
| 8/4/2010 14:22:01 | 23.864 | 11/24/2010 04:35:00 | 35.0 | 8/5/2010 12:06:01 | 24.2163 |
| 8/4/2010 14:42:01 | 23.864 | 11/24/2010 05:10:00 | 34.5 | 8/5/2010 12:26:01 | 24.2163 |
| 8/4/2010 15:02:01 | 23.864 | 11/24/2010 05:45:00 | 34.5 | 8/5/2010 12:46:01 | 24.2163 |
| 8/4/2010 15:22:01 | 23.864 | 11/24/2010 06:20:00 | 34.5 | 8/5/2010 13:06:01 | 24.2163 |
| 8/4/2010 15:42:01 | 23.926 | 11/24/2010 06:55:00 | 34.0 | 8/5/2010 13:26:01 | 24.2163 |
| 8/4/2010 16:02:01 | 23.926 | 11/24/2010 07:30:00 | 34.0 | 8/5/2010 13:46:01 | 24.1543 |
| 8/4/2010 16:22:01 | 23.926 | 11/24/2010 08:05:00 | 34.0 | 8/5/2010 14:06:01 | 24.1543 |
| 8/4/2010 16:42:01 | 23.989 | 11/24/2010 08:40:00 | 34.0 | 8/5/2010 14:26:01 | 24.1543 |
| 8/4/2010 17:02:01 | 23.989 | 11/24/2010 09:15:00 | 34.0 | 8/5/2010 14:46:01 | 24.1543 |
| 8/4/2010 17:22:01 | 24.051 | 11/24/2010 09:50:00 | 34.5 | 8/5/2010 15:06:01 | 24.1543 |
| 8/4/2010 17:42:01 | 24.114 | 11/24/2010 10:25:00 | 34.0 | 8/5/2010 15:26:01 | 24.1543 |
| 8/4/2010 18:02:01 | 24.114 | 11/24/2010 11:00:00 | 34.5 | 8/5/2010 15:46:01 | 24.1543 |
| 8/4/2010 18:22:01 | 24.176 | 11/24/2010 11:35:00 | 34.0 | 8/5/2010 16:06:01 | 24.1543 |
| 8/4/2010 18:42:01 | 24.176 | 11/24/2010 12:10:00 | 34.0 | 8/5/2010 16:26:01 | 24.1543 |
| 8/4/2010 19:02:01 | 24.239 | 11/24/2010 12:45:00 | 34.0 | 8/5/2010 16:46:01 | 24.1543 |

|                   |        |                     |      |                   |         |
|-------------------|--------|---------------------|------|-------------------|---------|
| 8/4/2010 19:22:01 | 24.239 | 11/24/2010 13:20:00 | 34.0 | 8/5/2010 17:06:01 | 24.1543 |
| 8/4/2010 19:42:01 | 24.239 | 11/24/2010 13:55:00 | 34.0 | 8/5/2010 17:26:01 | 24.1543 |
| 8/4/2010 20:02:01 | 24.301 | 11/24/2010 14:30:00 | 34.0 | 8/5/2010 17:46:01 | 24.1543 |
| 8/4/2010 20:22:01 | 24.301 | 11/24/2010 15:05:00 | 34.5 | 8/5/2010 18:06:01 | 24.1543 |
| 8/4/2010 20:42:01 | 24.364 | 11/24/2010 15:40:00 | 34.5 | 8/5/2010 18:26:01 | 24.1543 |
| 8/4/2010 21:02:01 | 24.364 | 11/24/2010 16:15:00 | 34.0 | 8/5/2010 18:46:01 | 24.1543 |
| 8/4/2010 21:22:01 | 24.364 | 11/24/2010 16:50:00 | 34.5 | 8/5/2010 19:06:01 | 24.1543 |
| 8/4/2010 21:42:01 | 24.426 | 11/24/2010 17:25:00 | 34.0 | 8/5/2010 19:26:01 | 24.1543 |
| 8/4/2010 22:02:01 | 24.426 | 11/24/2010 18:00:00 | 34.0 | 8/5/2010 19:46:01 | 24.2163 |
| 8/4/2010 22:22:01 | 24.426 | 11/24/2010 18:35:00 | 33.5 | 8/5/2010 20:06:01 | 24.2163 |
| 8/4/2010 22:42:01 | 24.426 | 11/24/2010 19:10:00 | 34.5 | 8/5/2010 20:26:01 | 24.2163 |
| 8/4/2010 23:02:01 | 24.426 | 11/24/2010 19:45:00 | 35.0 | 8/5/2010 20:46:01 | 24.2163 |
| 8/4/2010 23:22:01 | 24.426 | 11/24/2010 20:20:00 | 35.0 | 8/5/2010 21:06:01 | 24.2163 |
| 8/4/2010 23:42:01 | 24.426 | 11/24/2010 20:55:00 | 34.5 | 8/5/2010 21:26:01 | 24.2163 |
| 8/5/2010 00:02:01 | 24.426 | 11/24/2010 21:30:00 | 34.5 | 8/5/2010 21:46:01 | 24.2793 |
| 8/5/2010 00:22:01 | 24.426 | 11/24/2010 22:05:00 | 34.0 | 8/5/2010 22:06:01 | 24.2793 |
| 8/5/2010 00:42:01 | 24.426 | 11/24/2010 22:40:00 | 34.5 | 8/5/2010 22:26:01 | 24.2793 |
| 8/5/2010 01:02:01 | 24.426 | 11/24/2010 23:15:00 | 34.5 | 8/5/2010 22:46:01 | 24.2793 |
| 8/5/2010 01:22:01 | 24.426 | 11/24/2010 23:50:00 | 35.0 | 8/5/2010 23:06:01 | 24.2793 |
| 8/5/2010 01:42:01 | 24.426 | 11/25/2010 00:25:00 | 35.0 | 8/5/2010 23:26:01 | 24.2793 |
| 8/5/2010 02:02:01 | 24.426 | 11/25/2010 01:00:00 | 35.0 | 8/5/2010 23:46:01 | 24.3413 |
| 8/5/2010 02:22:01 | 24.364 | 11/25/2010 01:35:00 | 35.0 | 8/6/2010 00:06:01 | 24.3413 |
| 8/5/2010 02:42:01 | 24.364 | 11/25/2010 02:10:00 | 34.5 | 8/6/2010 00:26:01 | 24.3413 |
| 8/5/2010 03:02:01 | 24.364 | 11/25/2010 02:45:00 | 34.5 | 8/6/2010 00:46:01 | 24.3413 |
| 8/5/2010 03:22:01 | 24.364 | 11/25/2010 03:20:00 | 35.0 | 8/6/2010 01:06:01 | 24.3413 |
| 8/5/2010 03:42:01 | 24.364 | 11/25/2010 03:55:00 | 34.5 | 8/6/2010 01:26:01 | 24.3413 |
| 8/5/2010 04:02:01 | 24.301 | 11/25/2010 04:30:00 | 34.5 | 8/6/2010 01:46:01 | 24.3413 |
| 8/5/2010 04:22:01 | 24.301 | 11/25/2010 05:05:00 | 34.5 | 8/6/2010 02:06:01 | 24.3413 |
| 8/5/2010 04:42:01 | 24.301 | 11/25/2010 05:40:00 | 34.5 | 8/6/2010 02:26:01 | 24.3413 |
| 8/5/2010 05:02:01 | 24.301 | 11/25/2010 06:15:00 | 34.0 | 8/6/2010 02:46:01 | 24.3413 |
| 8/5/2010 05:22:01 | 24.239 | 11/25/2010 06:50:00 | 34.0 | 8/6/2010 03:06:01 | 24.3413 |
| 8/5/2010 05:42:01 | 24.239 | 11/25/2010 07:25:00 | 33.5 | 8/6/2010 03:26:01 | 24.3413 |
| 8/5/2010 06:02:01 | 24.239 | 11/25/2010 08:00:00 | 33.0 | 8/6/2010 03:46:01 | 24.3413 |
| 8/5/2010 06:22:01 | 24.239 | 11/25/2010 08:35:00 | 33.5 | 8/6/2010 04:06:01 | 24.3413 |
| 8/5/2010 06:42:01 | 24.176 | 11/25/2010 09:10:00 | 33.0 | 8/6/2010 04:26:01 | 24.3413 |
| 8/5/2010 07:02:01 | 24.176 | 11/25/2010 09:45:00 | 33.0 | 8/6/2010 04:46:01 | 24.3413 |
| 8/5/2010 07:22:01 | 24.176 | 11/25/2010 10:20:00 | 33.0 | 8/6/2010 05:06:01 | 24.3413 |
| 8/5/2010 07:42:01 | 24.176 | 11/25/2010 10:55:00 | 32.5 | 8/6/2010 05:26:01 | 24.3413 |
| 8/5/2010 08:02:01 | 24.114 | 11/25/2010 11:30:00 | 33.5 | 8/6/2010 05:46:01 | 24.3413 |
| 8/5/2010 08:22:01 | 24.114 | 11/25/2010 12:05:00 | 33.0 | 8/6/2010 06:06:01 | 24.3413 |
| 8/5/2010 08:42:01 | 24.114 | 11/25/2010 12:40:00 | 33.0 | 8/6/2010 06:26:01 | 24.3413 |
| 8/5/2010 09:02:01 | 24.051 | 11/25/2010 13:15:00 | 32.5 | 8/6/2010 06:46:01 | 24.3413 |
| 8/5/2010 09:22:01 | 24.051 | 11/25/2010 13:50:00 | 32.5 | 8/6/2010 07:06:01 | 24.3413 |
| 8/5/2010 09:42:01 | 24.051 | 11/25/2010 14:25:00 | 32.5 | 8/6/2010 07:26:01 | 24.3413 |
| 8/5/2010 10:02:01 | 23.989 | 11/25/2010 15:00:00 | 32.5 | 8/6/2010 07:46:01 | 24.3413 |
| 8/5/2010 10:22:01 | 23.989 | 11/25/2010 15:35:00 | 32.5 | 8/6/2010 08:06:01 | 24.2793 |
| 8/5/2010 10:42:01 | 23.989 | 11/25/2010 16:10:00 | 32.5 | 8/6/2010 08:26:01 | 24.2793 |
| 8/5/2010 11:02:01 | 23.926 | 11/25/2010 16:45:00 | 32.5 | 8/6/2010 08:46:01 | 24.2793 |
| 8/5/2010 11:22:01 | 23.926 | 11/25/2010 17:20:00 | 32.5 | 8/6/2010 09:06:01 | 24.2793 |
| 8/5/2010 11:42:01 | 23.926 | 11/25/2010 17:55:00 | 32.5 | 8/6/2010 09:26:01 | 24.2793 |

|                   |        |                     |      |                   |         |
|-------------------|--------|---------------------|------|-------------------|---------|
| 8/5/2010 12:02:01 | 23.926 | 11/25/2010 18:30:00 | 32.5 | 8/6/2010 09:46:01 | 24.2163 |
| 8/5/2010 12:22:01 | 23.864 | 11/25/2010 19:05:00 | 33.0 | 8/6/2010 10:06:01 | 24.2163 |
| 8/5/2010 12:42:01 | 23.864 | 11/25/2010 19:40:00 | 33.5 | 8/6/2010 10:26:01 | 24.2163 |
| 8/5/2010 13:02:01 | 23.864 | 11/25/2010 20:15:00 | 35.0 | 8/6/2010 10:46:01 | 24.2163 |
| 8/5/2010 13:22:01 | 23.864 | 11/25/2010 20:50:00 | 34.5 | 8/6/2010 11:06:01 | 24.2163 |
| 8/5/2010 13:42:01 | 23.864 | 11/25/2010 21:25:00 | 35.0 | 8/6/2010 11:26:01 | 24.2163 |
| 8/5/2010 14:02:01 | 23.864 | 11/25/2010 22:00:00 | 35.5 | 8/6/2010 11:46:01 | 24.1543 |
| 8/5/2010 14:22:01 | 23.864 | 11/25/2010 22:35:00 | 35.0 | 8/6/2010 12:06:01 | 24.1543 |
| 8/5/2010 14:42:01 | 23.864 | 11/25/2010 23:10:00 | 34.5 | 8/6/2010 12:26:01 | 24.1543 |
| 8/5/2010 15:02:01 | 23.864 | 11/25/2010 23:45:00 | 34.5 | 8/6/2010 12:46:01 | 24.1543 |
| 8/5/2010 15:22:01 | 23.926 | 11/26/2010 00:20:00 | 35.5 | 8/6/2010 13:06:01 | 24.1543 |
| 8/5/2010 15:42:01 | 23.926 | 11/26/2010 00:55:00 | 35.0 | 8/6/2010 13:26:01 | 24.0913 |
| 8/5/2010 16:02:01 | 23.989 | 11/26/2010 01:30:00 | 34.5 | 8/6/2010 13:46:01 | 24.0913 |
| 8/5/2010 16:22:01 | 23.989 | 11/26/2010 02:05:00 | 34.5 | 8/6/2010 14:06:01 | 24.0913 |
| 8/5/2010 16:42:01 | 23.989 | 11/26/2010 02:40:00 | 34.5 | 8/6/2010 14:26:01 | 24.0913 |
| 8/5/2010 17:02:01 | 24.051 | 11/26/2010 03:15:00 | 34.5 | 8/6/2010 14:46:01 | 24.0913 |
| 8/5/2010 17:22:01 | 24.114 | 11/26/2010 03:50:00 | 34.5 | 8/6/2010 15:06:01 | 24.0913 |
| 8/5/2010 17:42:01 | 24.114 | 11/26/2010 04:25:00 | 34.0 | 8/6/2010 15:26:01 | 24.0913 |
| 8/5/2010 18:02:01 | 24.176 | 11/26/2010 05:00:00 | 34.5 | 8/6/2010 15:46:01 | 24.0293 |
| 8/5/2010 18:22:01 | 24.176 | 11/26/2010 05:35:00 | 34.0 | 8/6/2010 16:06:01 | 24.0293 |
| 8/5/2010 18:42:01 | 24.239 | 11/26/2010 06:10:00 | 33.5 | 8/6/2010 16:26:01 | 24.0293 |
| 8/5/2010 19:02:01 | 24.239 | 11/26/2010 06:45:00 | 33.0 | 8/6/2010 16:46:01 | 24.0293 |
| 8/5/2010 19:22:01 | 24.301 | 11/26/2010 07:20:00 | 33.5 | 8/6/2010 17:06:01 | 24.0293 |
| 8/5/2010 19:42:01 | 24.301 | 11/26/2010 07:55:00 | 33.0 | 8/6/2010 17:26:01 | 24.0293 |
| 8/5/2010 20:02:01 | 24.364 | 11/26/2010 08:30:00 | 32.5 | 8/6/2010 17:46:01 | 24.0293 |
| 8/5/2010 20:22:01 | 24.364 | 11/26/2010 09:05:00 | 33.0 | 8/6/2010 18:06:01 | 24.0293 |
| 8/5/2010 20:42:01 | 24.364 | 11/26/2010 09:40:00 | 33.0 | 8/6/2010 18:26:01 | 24.0913 |
| 8/5/2010 21:02:01 | 24.426 | 11/26/2010 10:15:00 | 32.5 | 8/6/2010 18:46:01 | 24.0913 |
| 8/5/2010 21:22:01 | 24.426 | 11/26/2010 10:50:00 | 32.0 | 8/6/2010 19:06:01 | 24.0913 |
| 8/5/2010 21:42:01 | 24.426 | 11/26/2010 11:25:00 | 32.0 | 8/6/2010 19:26:01 | 24.0913 |
| 8/5/2010 22:02:01 | 24.426 | 11/26/2010 12:00:00 | 31.5 | 8/6/2010 19:46:01 | 24.0913 |
| 8/5/2010 22:22:01 | 24.426 | 11/26/2010 12:35:00 | 31.5 | 8/6/2010 20:06:01 | 24.0913 |
| 8/5/2010 22:42:01 | 24.489 | 11/26/2010 13:10:00 | 30.5 | 8/6/2010 20:26:01 | 24.0913 |
| 8/5/2010 23:02:01 | 24.489 | 11/26/2010 13:45:00 | 31.5 | 8/6/2010 20:46:01 | 24.1543 |
| 8/5/2010 23:22:01 | 24.489 | 11/26/2010 14:20:00 | 32.0 | 8/6/2010 21:06:01 | 24.1543 |
| 8/5/2010 23:42:01 | 24.489 | 11/26/2010 14:55:00 | 31.5 | 8/6/2010 21:26:01 | 24.1543 |
| 8/6/2010 00:02:01 | 24.489 | 11/26/2010 15:30:00 | 30.0 | 8/6/2010 21:46:01 | 24.1543 |
| 8/6/2010 00:22:01 | 24.489 | 11/26/2010 16:05:00 | 29.5 | 8/6/2010 22:06:01 | 24.1543 |
| 8/6/2010 00:42:01 | 24.426 | 11/26/2010 16:40:00 | 29.5 | 8/6/2010 22:26:01 | 24.2163 |
| 8/6/2010 01:02:01 | 24.426 | 11/26/2010 17:15:00 | 31.5 | 8/6/2010 22:46:01 | 24.2163 |
| 8/6/2010 01:22:01 | 24.426 | 11/26/2010 17:50:00 | 33.0 | 8/6/2010 23:06:01 | 24.2163 |
| 8/6/2010 01:42:01 | 24.426 | 11/26/2010 18:25:00 | 34.0 | 8/6/2010 23:26:01 | 24.2163 |
| 8/6/2010 02:02:01 | 24.426 | 11/26/2010 19:00:00 | 34.5 | 8/6/2010 23:46:01 | 24.2163 |
| 8/6/2010 02:22:01 | 24.426 | 11/26/2010 19:35:00 | 35.0 | 8/7/2010 00:06:01 | 24.2163 |
| 8/6/2010 02:42:01 | 24.364 | 11/26/2010 20:10:00 | 35.5 | 8/7/2010 00:26:01 | 24.2793 |
| 8/6/2010 03:02:01 | 24.364 | 11/26/2010 20:45:00 | 35.5 | 8/7/2010 00:46:01 | 24.2793 |
| 8/6/2010 03:22:01 | 24.364 | 11/26/2010 21:20:00 | 35.0 | 8/7/2010 01:06:01 | 24.2793 |
| 8/6/2010 03:42:01 | 24.301 | 11/26/2010 21:55:00 | 34.5 | 8/7/2010 01:26:01 | 24.2793 |
| 8/6/2010 04:02:01 | 24.301 | 11/26/2010 22:30:00 | 35.0 | 8/7/2010 01:46:01 | 24.2793 |
| 8/6/2010 04:22:01 | 24.301 | 11/26/2010 23:05:00 | 34.5 | 8/7/2010 02:06:01 | 24.2793 |

|                   |        |                     |      |                   |         |
|-------------------|--------|---------------------|------|-------------------|---------|
| 8/6/2010 04:42:01 | 24.301 | 11/26/2010 23:40:00 | 35.0 | 8/7/2010 02:26:01 | 24.2793 |
| 8/6/2010 05:02:01 | 24.301 | 11/27/2010 00:15:00 | 35.0 | 8/7/2010 02:46:01 | 24.2793 |
| 8/6/2010 05:22:01 | 24.239 | 11/27/2010 00:50:00 | 35.0 | 8/7/2010 03:06:01 | 24.3413 |
| 8/6/2010 05:42:01 | 24.239 | 11/27/2010 01:25:00 | 35.0 | 8/7/2010 03:26:01 | 24.3413 |
| 8/6/2010 06:02:01 | 24.176 | 11/27/2010 02:00:00 | 35.0 | 8/7/2010 03:46:01 | 24.3413 |
| 8/6/2010 06:22:01 | 24.176 | 11/27/2010 02:35:00 | 35.0 | 8/7/2010 04:06:01 | 24.3413 |
| 8/6/2010 06:42:01 | 24.176 | 11/27/2010 03:10:00 | 35.0 | 8/7/2010 04:26:01 | 24.3413 |
| 8/6/2010 07:02:01 | 24.114 | 11/27/2010 03:45:00 | 35.0 | 8/7/2010 04:46:01 | 24.3413 |
| 8/6/2010 07:22:01 | 24.114 | 11/27/2010 04:20:00 | 34.5 | 8/7/2010 05:06:01 | 24.3413 |
| 8/6/2010 07:42:01 | 24.114 | 11/27/2010 04:55:00 | 34.5 | 8/7/2010 05:26:01 | 24.3413 |
| 8/6/2010 08:02:01 | 24.051 | 11/27/2010 05:30:00 | 34.5 | 8/7/2010 05:46:01 | 24.3413 |
| 8/6/2010 08:22:01 | 24.051 | 11/27/2010 06:05:00 | 34.0 | 8/7/2010 06:06:01 | 24.3413 |
| 8/6/2010 08:42:01 | 24.051 | 11/27/2010 06:40:00 | 34.5 | 8/7/2010 06:26:01 | 24.3413 |
| 8/6/2010 09:02:01 | 23.989 | 11/27/2010 07:15:00 | 34.5 | 8/7/2010 06:46:01 | 24.3413 |
| 8/6/2010 09:22:01 | 23.989 | 11/27/2010 07:50:00 | 34.5 | 8/7/2010 07:06:01 | 24.3413 |
| 8/6/2010 09:42:01 | 23.989 | 11/27/2010 08:25:00 | 34.5 | 8/7/2010 07:26:01 | 24.3413 |
| 8/6/2010 10:02:01 | 23.926 | 11/27/2010 09:00:00 | 35.0 | 8/7/2010 07:46:01 | 24.3413 |
| 8/6/2010 10:22:01 | 23.926 | 11/27/2010 09:35:00 | 34.5 | 8/7/2010 08:06:01 | 24.3413 |
| 8/6/2010 10:42:01 | 23.864 | 11/27/2010 10:10:00 | 34.5 | 8/7/2010 08:26:01 | 24.3413 |
| 8/6/2010 11:02:01 | 23.864 | 11/27/2010 10:45:00 | 34.5 | 8/7/2010 08:46:01 | 24.3413 |
| 8/6/2010 11:22:01 | 23.864 | 11/27/2010 11:20:00 | 34.5 | 8/7/2010 09:06:01 | 24.3413 |
| 8/6/2010 11:42:01 | 23.864 | 11/27/2010 11:55:00 | 34.5 | 8/7/2010 09:26:01 | 24.3413 |
| 8/6/2010 12:02:01 | 23.801 | 11/27/2010 12:30:00 | 34.5 | 8/7/2010 09:46:01 | 24.3413 |
| 8/6/2010 12:22:01 | 23.801 | 11/27/2010 13:05:00 | 35.0 | 8/7/2010 10:06:01 | 24.3413 |
| 8/6/2010 12:42:01 | 23.801 | 11/27/2010 13:40:00 | 35.0 | 8/7/2010 10:26:01 | 24.3413 |
| 8/6/2010 13:02:01 | 23.801 | 11/27/2010 14:15:00 | 35.0 | 8/7/2010 10:46:01 | 24.3413 |
| 8/6/2010 13:22:01 | 23.801 | 11/27/2010 14:50:00 | 35.5 | 8/7/2010 11:06:01 | 24.3413 |
| 8/6/2010 13:42:01 | 23.801 | 11/27/2010 15:25:00 | 35.5 | 8/7/2010 11:26:01 | 24.3413 |
| 8/6/2010 14:02:01 | 23.801 | 11/27/2010 16:00:00 | 35.5 | 8/7/2010 11:46:01 | 24.3413 |
| 8/6/2010 14:22:01 | 23.801 | 11/27/2010 16:35:00 | 35.5 | 8/7/2010 12:06:01 | 24.2793 |
| 8/6/2010 14:42:01 | 23.801 | 11/27/2010 17:10:00 | 35.5 | 8/7/2010 12:26:01 | 24.2793 |
| 8/6/2010 15:02:01 | 23.801 | 11/27/2010 17:45:00 | 35.5 | 8/7/2010 12:46:01 | 24.2793 |
| 8/6/2010 15:22:01 | 23.864 | 11/27/2010 18:20:00 | 35.0 | 8/7/2010 13:06:01 | 24.2793 |
| 8/6/2010 15:42:01 | 23.864 | 11/27/2010 18:55:00 | 35.5 | 8/7/2010 13:26:01 | 24.2793 |
| 8/6/2010 16:02:01 | 23.926 | 11/27/2010 19:30:00 | 35.5 | 8/7/2010 13:46:01 | 24.2793 |
| 8/6/2010 16:22:01 | 23.926 | 11/27/2010 20:05:00 | 34.0 | 8/7/2010 14:06:01 | 24.2793 |
| 8/6/2010 16:42:01 | 23.926 | 11/27/2010 20:40:00 | 34.0 | 8/7/2010 14:26:01 | 24.2793 |
| 8/6/2010 17:02:01 | 23.989 | 11/27/2010 21:15:00 | 33.5 | 8/7/2010 14:46:01 | 24.2793 |
| 8/6/2010 17:22:01 | 24.051 | 11/27/2010 21:50:00 | 34.0 | 8/7/2010 15:06:01 | 24.2793 |
| 8/6/2010 17:42:01 | 24.051 | 11/27/2010 22:25:00 | 34.5 | 8/7/2010 15:26:01 | 24.2793 |
| 8/6/2010 18:02:01 | 24.114 | 11/27/2010 23:00:00 | 34.0 | 8/7/2010 15:46:01 | 24.2793 |
| 8/6/2010 18:22:01 | 24.114 | 11/27/2010 23:35:00 | 34.0 | 8/7/2010 16:06:01 | 24.2793 |
| 8/6/2010 18:42:01 | 24.176 | 11/28/2010 00:10:00 | 34.0 | 8/7/2010 16:26:01 | 24.2793 |
| 8/6/2010 19:02:01 | 24.239 | 11/28/2010 00:45:00 | 35.0 | 8/7/2010 16:46:01 | 24.2793 |
| 8/6/2010 19:22:01 | 24.239 | 11/28/2010 01:20:00 | 34.5 | 8/7/2010 17:06:01 | 24.2793 |
| 8/6/2010 19:42:01 | 24.301 | 11/28/2010 01:55:00 | 34.5 | 8/7/2010 17:26:01 | 24.2793 |
| 8/6/2010 20:02:01 | 24.301 | 11/28/2010 02:30:00 | 35.0 | 8/7/2010 17:46:01 | 24.2793 |
| 8/6/2010 20:22:01 | 24.301 | 11/28/2010 03:05:00 | 34.5 | 8/7/2010 18:06:01 | 24.2793 |
| 8/6/2010 20:42:01 | 24.364 | 11/28/2010 03:40:00 | 34.5 | 8/7/2010 18:26:01 | 24.2793 |
| 8/6/2010 21:02:01 | 24.364 | 11/28/2010 04:15:00 | 34.5 | 8/7/2010 18:46:01 | 24.2793 |

|                   |        |                     |      |                   |         |
|-------------------|--------|---------------------|------|-------------------|---------|
| 8/6/2010 21:22:01 | 24.426 | 11/28/2010 04:50:00 | 34.5 | 8/7/2010 19:06:01 | 24.2793 |
| 8/6/2010 21:42:01 | 24.426 | 11/28/2010 05:25:00 | 34.5 | 8/7/2010 19:26:01 | 24.3413 |
| 8/6/2010 22:02:01 | 24.426 | 11/28/2010 06:00:00 | 34.5 | 8/7/2010 19:46:01 | 24.3413 |
| 8/6/2010 22:22:01 | 24.426 | 11/28/2010 06:35:00 | 33.5 | 8/7/2010 20:06:01 | 24.3413 |
| 8/6/2010 22:42:01 | 24.489 | 11/28/2010 07:10:00 | 33.0 | 8/7/2010 20:26:01 | 24.3413 |
| 8/6/2010 23:02:01 | 24.489 | 11/28/2010 07:45:00 | 33.0 | 8/7/2010 20:46:01 | 24.4043 |
| 8/6/2010 23:22:01 | 24.489 | 11/28/2010 08:20:00 | 33.5 | 8/7/2010 21:06:01 | 24.4043 |
| 8/6/2010 23:42:01 | 24.489 | 11/28/2010 08:55:00 | 33.0 | 8/7/2010 21:26:01 | 24.4043 |
| 8/7/2010 00:02:01 | 24.489 | 11/28/2010 09:30:00 | 33.0 | 8/7/2010 21:46:01 | 24.4043 |
| 8/7/2010 00:22:01 | 24.489 | 11/28/2010 10:05:00 | 32.5 | 8/7/2010 22:06:01 | 24.4043 |
| 8/7/2010 00:42:01 | 24.489 | 11/28/2010 10:40:00 | 33.0 | 8/7/2010 22:26:01 | 24.4663 |
| 8/7/2010 01:02:01 | 24.489 | 11/28/2010 11:15:00 | 33.0 | 8/7/2010 22:46:01 | 24.4663 |
| 8/7/2010 01:22:01 | 24.489 | 11/28/2010 11:50:00 | 33.0 | 8/7/2010 23:06:01 | 24.4663 |
| 8/7/2010 01:42:01 | 24.489 | 11/28/2010 12:25:00 | 33.5 | 8/7/2010 23:26:01 | 24.4663 |
| 8/7/2010 02:02:01 | 24.489 | 11/28/2010 13:00:00 | 33.5 | 8/7/2010 23:46:01 | 24.5293 |
| 8/7/2010 02:22:01 | 24.489 | 11/28/2010 13:35:00 | 33.5 | 8/8/2010 00:06:01 | 24.5293 |
| 8/7/2010 02:42:01 | 24.489 | 11/28/2010 14:10:00 | 34.0 | 8/8/2010 00:26:01 | 24.5293 |
| 8/7/2010 03:02:01 | 24.489 | 11/28/2010 14:45:00 | 34.0 | 8/8/2010 00:46:01 | 24.5293 |
| 8/7/2010 03:22:01 | 24.489 | 11/28/2010 15:20:00 | 34.5 | 8/8/2010 01:06:01 | 24.5293 |
| 8/7/2010 03:42:01 | 24.489 | 11/28/2010 15:55:00 | 34.5 | 8/8/2010 01:26:01 | 24.5293 |
| 8/7/2010 04:02:01 | 24.489 | 11/28/2010 16:30:00 | 34.0 | 8/8/2010 01:46:01 | 24.5913 |
| 8/7/2010 04:22:01 | 24.489 | 11/28/2010 17:05:00 | 34.5 | 8/8/2010 02:06:01 | 24.5913 |
| 8/7/2010 04:42:01 | 24.489 | 11/28/2010 17:40:00 | 34.0 | 8/8/2010 02:26:01 | 24.5913 |
| 8/7/2010 05:02:01 | 24.426 | 11/28/2010 18:15:00 | 34.0 | 8/8/2010 02:46:01 | 24.5913 |
| 8/7/2010 05:22:01 | 24.426 | 11/28/2010 18:50:00 | 34.5 | 8/8/2010 03:06:01 | 24.5913 |
| 8/7/2010 05:42:01 | 24.426 | 11/28/2010 19:25:00 | 34.5 | 8/8/2010 03:26:01 | 24.5913 |
| 8/7/2010 06:02:01 | 24.426 | 11/28/2010 20:00:00 | 35.0 | 8/8/2010 03:46:01 | 24.5913 |
| 8/7/2010 06:22:01 | 24.426 | 11/28/2010 20:35:00 | 35.0 | 8/8/2010 04:06:01 | 24.5913 |
| 8/7/2010 06:42:01 | 24.364 | 11/28/2010 21:10:00 | 35.0 | 8/8/2010 04:26:01 | 24.5913 |
| 8/7/2010 07:02:01 | 24.364 | 11/28/2010 21:45:00 | 35.5 | 8/8/2010 04:46:01 | 24.6543 |
| 8/7/2010 07:22:01 | 24.364 | 11/28/2010 22:20:00 | 35.0 | 8/8/2010 05:06:01 | 24.6543 |
| 8/7/2010 07:42:01 | 24.364 | 11/28/2010 22:55:00 | 35.0 | 8/8/2010 05:26:01 | 24.6543 |
| 8/7/2010 08:02:01 | 24.364 | 11/28/2010 23:30:00 | 35.0 | 8/8/2010 05:46:01 | 24.6543 |
| 8/7/2010 08:22:01 | 24.301 | 11/29/2010 00:05:00 | 35.0 | 8/8/2010 06:06:01 | 24.6543 |
| 8/7/2010 08:42:01 | 24.301 | 11/29/2010 00:40:00 | 35.0 | 8/8/2010 06:26:01 | 24.6543 |
| 8/7/2010 09:02:01 | 24.301 | 11/29/2010 01:15:00 | 35.0 | 8/8/2010 06:46:01 | 24.6543 |
| 8/7/2010 09:22:01 | 24.301 | 11/29/2010 01:50:00 | 35.0 | 8/8/2010 07:06:01 | 24.6543 |
| 8/7/2010 09:42:01 | 24.239 | 11/29/2010 02:25:00 | 35.0 | 8/8/2010 07:26:01 | 24.6543 |
| 8/7/2010 10:02:01 | 24.239 | 11/29/2010 03:00:00 | 35.0 | 8/8/2010 07:46:01 | 24.6543 |
| 8/7/2010 10:22:01 | 24.239 | 11/29/2010 03:35:00 | 34.5 | 8/8/2010 08:06:01 | 24.6543 |
| 8/7/2010 10:42:01 | 24.239 | 11/29/2010 04:10:00 | 34.5 | 8/8/2010 08:26:01 | 24.6543 |
| 8/7/2010 11:02:01 | 24.176 | 11/29/2010 04:45:00 | 34.5 | 8/8/2010 08:46:01 | 24.6543 |
| 8/7/2010 11:22:01 | 24.176 | 11/29/2010 05:20:00 | 34.5 | 8/8/2010 09:06:01 | 24.5913 |
| 8/7/2010 11:42:01 | 24.176 | 11/29/2010 05:55:00 | 34.5 | 8/8/2010 09:26:01 | 24.5913 |
| 8/7/2010 12:02:01 | 24.176 | 11/29/2010 06:30:00 | 34.0 | 8/8/2010 09:46:01 | 24.5913 |
| 8/7/2010 12:22:01 | 24.176 | 11/29/2010 07:05:00 | 34.0 | 8/8/2010 10:06:01 | 24.5913 |
| 8/7/2010 12:42:01 | 24.114 | 11/29/2010 07:40:00 | 34.0 | 8/8/2010 10:26:01 | 24.5913 |
| 8/7/2010 13:02:01 | 24.114 | 11/29/2010 08:15:00 | 33.5 | 8/8/2010 10:46:01 | 24.5913 |
| 8/7/2010 13:22:01 | 24.114 | 11/29/2010 08:50:00 | 33.0 | 8/8/2010 11:06:01 | 24.5913 |
| 8/7/2010 13:42:01 | 24.114 | 11/29/2010 09:25:00 | 33.5 | 8/8/2010 11:26:01 | 24.5913 |

|                   |        |                     |      |                   |         |
|-------------------|--------|---------------------|------|-------------------|---------|
| 8/7/2010 14:02:01 | 24.114 | 11/29/2010 10:00:00 | 33.0 | 8/8/2010 11:46:01 | 24.5913 |
| 8/7/2010 14:22:01 | 24.114 | 11/29/2010 10:35:00 | 33.0 | 8/8/2010 12:06:01 | 24.5913 |
| 8/7/2010 14:42:01 | 24.114 | 11/29/2010 11:10:00 | 33.0 | 8/8/2010 12:26:01 | 24.5293 |
| 8/7/2010 15:02:01 | 24.176 | 11/29/2010 11:45:00 | 32.5 | 8/8/2010 12:46:01 | 24.5293 |
| 8/7/2010 15:22:01 | 24.176 | 11/29/2010 12:20:00 | 32.5 | 8/8/2010 13:06:01 | 24.5293 |
| 8/7/2010 15:42:01 | 24.239 | 11/29/2010 12:55:00 | 32.5 | 8/8/2010 13:26:01 | 24.5293 |
| 8/7/2010 16:02:01 | 24.239 | 11/29/2010 13:30:00 | 33.0 | 8/8/2010 13:46:01 | 24.5293 |
| 8/7/2010 16:22:01 | 24.239 | 11/29/2010 14:05:00 | 33.0 | 8/8/2010 14:06:01 | 24.5293 |
| 8/7/2010 16:42:01 | 24.301 | 11/29/2010 14:40:00 | 33.5 | 8/8/2010 14:26:01 | 24.5293 |
| 8/7/2010 17:02:01 | 24.364 | 11/29/2010 15:15:00 | 33.5 | 8/8/2010 14:46:01 | 24.5293 |
| 8/7/2010 17:22:01 | 24.364 | 11/29/2010 15:50:00 | 33.0 | 8/8/2010 15:06:01 | 24.5293 |
| 8/7/2010 17:42:01 | 24.426 | 11/29/2010 16:25:00 | 33.5 | 8/8/2010 15:26:01 | 24.5293 |
| 8/7/2010 18:02:01 | 24.426 | 11/29/2010 17:00:00 | 33.5 | 8/8/2010 15:46:01 | 24.5293 |
| 8/7/2010 18:22:01 | 24.489 | 11/29/2010 17:35:00 | 32.5 | 8/8/2010 16:06:01 | 24.5293 |
| 8/7/2010 18:42:01 | 24.551 | 11/29/2010 18:10:00 | 33.0 | 8/8/2010 16:26:01 | 24.5293 |
| 8/7/2010 19:02:01 | 24.551 | 11/29/2010 18:45:00 | 33.0 | 8/8/2010 16:46:01 | 24.5293 |
| 8/7/2010 19:22:01 | 24.614 | 11/29/2010 19:20:00 | 33.0 | 8/8/2010 17:06:01 | 24.5293 |
| 8/7/2010 19:42:01 | 24.614 | 11/29/2010 19:55:00 | 33.5 | 8/8/2010 17:26:01 | 24.5293 |
| 8/7/2010 20:02:01 | 24.676 | 11/29/2010 20:30:00 | 33.0 | 8/8/2010 17:46:01 | 24.5293 |
| 8/7/2010 20:22:01 | 24.676 | 11/29/2010 21:05:00 | 33.0 | 8/8/2010 18:06:01 | 24.5293 |
| 8/7/2010 20:42:01 | 24.676 | 11/29/2010 21:40:00 | 33.5 | 8/8/2010 18:26:01 | 24.5293 |
| 8/7/2010 21:02:01 | 24.739 | 11/29/2010 22:15:00 | 34.0 | 8/8/2010 18:46:01 | 24.5293 |
| 8/7/2010 21:22:01 | 24.739 | 11/29/2010 22:50:00 | 34.5 | 8/8/2010 19:06:01 | 24.5913 |
| 8/7/2010 21:42:01 | 24.739 | 11/29/2010 23:25:00 | 34.5 | 8/8/2010 19:26:01 | 24.5913 |
| 8/7/2010 22:02:01 | 24.801 | 11/30/2010 00:00:00 | 34.5 | 8/8/2010 19:46:01 | 24.5913 |
| 8/7/2010 22:22:01 | 24.801 | 11/30/2010 00:35:00 | 34.5 | 8/8/2010 20:06:01 | 24.5913 |
| 8/7/2010 22:42:01 | 24.801 | 11/30/2010 01:10:00 | 35.0 | 8/8/2010 20:26:01 | 24.5913 |
| 8/7/2010 23:02:01 | 24.801 | 11/30/2010 01:45:00 | 35.0 | 8/8/2010 20:46:01 | 24.5913 |
| 8/7/2010 23:22:01 | 24.801 | 11/30/2010 02:20:00 | 35.0 | 8/8/2010 21:06:01 | 24.6543 |
| 8/7/2010 23:42:01 | 24.801 | 11/30/2010 02:55:00 | 35.0 | 8/8/2010 21:26:01 | 24.6543 |
| 8/8/2010 00:02:01 | 24.801 | 11/30/2010 03:30:00 | 35.0 | 8/8/2010 21:46:01 | 24.6543 |
| 8/8/2010 00:22:01 | 24.801 | 11/30/2010 04:05:00 | 34.5 | 8/8/2010 22:06:01 | 24.6543 |
| 8/8/2010 00:42:01 | 24.801 | 11/30/2010 04:40:00 | 34.5 | 8/8/2010 22:26:01 | 24.6543 |
| 8/8/2010 01:02:01 | 24.801 | 11/30/2010 05:15:00 | 34.5 | 8/8/2010 22:46:01 | 24.7173 |
| 8/8/2010 01:22:01 | 24.801 | 11/30/2010 05:50:00 | 35.0 | 8/8/2010 23:06:01 | 24.7173 |
| 8/8/2010 01:42:01 | 24.801 | 11/30/2010 06:25:00 | 34.5 | 8/8/2010 23:26:01 | 24.7173 |
| 8/8/2010 02:02:01 | 24.801 | 11/30/2010 07:00:00 | 34.5 | 8/8/2010 23:46:01 | 24.7173 |
| 8/8/2010 02:22:01 | 24.801 | 11/30/2010 07:35:00 | 34.5 | 8/9/2010 00:06:01 | 24.7173 |
| 8/8/2010 02:42:01 | 24.801 | 11/30/2010 08:10:00 | 34.5 | 8/9/2010 00:26:01 | 24.7173 |
| 8/8/2010 03:02:01 | 24.801 | 11/30/2010 08:45:00 | 34.0 | 8/9/2010 00:46:01 | 24.7173 |
| 8/8/2010 03:22:01 | 24.801 | 11/30/2010 09:20:00 | 34.5 | 8/9/2010 01:06:01 | 24.7793 |
| 8/8/2010 03:42:01 | 24.801 | 11/30/2010 09:55:00 | 34.5 | 8/9/2010 01:26:01 | 24.7793 |
| 8/8/2010 04:02:01 | 24.801 | 11/30/2010 10:30:00 | 34.5 | 8/9/2010 01:46:01 | 24.7793 |
| 8/8/2010 04:22:01 | 24.739 | 11/30/2010 11:05:00 | 34.0 | 8/9/2010 02:06:01 | 24.7793 |
| 8/8/2010 04:42:01 | 24.739 | 11/30/2010 11:40:00 | 34.0 | 8/9/2010 02:26:01 | 24.7793 |
| 8/8/2010 05:02:01 | 24.739 | 11/30/2010 12:15:00 | 34.0 | 8/9/2010 02:46:01 | 24.7793 |
| 8/8/2010 05:22:01 | 24.739 | 11/30/2010 12:50:00 | 34.0 | 8/9/2010 03:06:01 | 24.7793 |
| 8/8/2010 05:42:01 | 24.739 | 11/30/2010 13:25:00 | 34.0 | 8/9/2010 03:26:01 | 24.7793 |
| 8/8/2010 06:02:01 | 24.739 | 11/30/2010 14:00:00 | 34.0 | 8/9/2010 03:46:01 | 24.7793 |
| 8/8/2010 06:22:01 | 24.676 | 11/30/2010 14:35:00 | 34.5 | 8/9/2010 04:06:01 | 24.7793 |



|                   |        |                     |      |                   |         |
|-------------------|--------|---------------------|------|-------------------|---------|
| 8/8/2010 06:42:01 | 24.676 | 11/30/2010 15:10:00 | 34.5 | 8/9/2010 04:26:01 | 24.7793 |
| 8/8/2010 07:02:01 | 24.676 | 11/30/2010 15:45:00 | 34.0 | 8/9/2010 04:46:01 | 24.7793 |
| 8/8/2010 07:22:01 | 24.676 | 11/30/2010 16:20:00 | 34.0 | 8/9/2010 05:06:01 | 24.7793 |
| 8/8/2010 07:42:01 | 24.614 | 11/30/2010 16:55:00 | 34.0 | 8/9/2010 05:26:01 | 24.7793 |
| 8/8/2010 08:02:01 | 24.614 | 11/30/2010 17:30:00 | 34.0 | 8/9/2010 05:46:01 | 24.7793 |
| 8/8/2010 08:22:01 | 24.614 | 11/30/2010 18:05:00 | 34.0 | 8/9/2010 06:06:01 | 24.7793 |
| 8/8/2010 08:42:01 | 24.614 | 11/30/2010 18:40:00 | 33.5 | 8/9/2010 06:26:01 | 24.7793 |
| 8/8/2010 09:02:01 | 24.614 | 11/30/2010 19:15:00 | 34.0 | 8/9/2010 06:46:01 | 24.7793 |
| 8/8/2010 09:22:01 | 24.551 | 11/30/2010 19:50:00 | 34.0 | 8/9/2010 07:06:01 | 24.7793 |
| 8/8/2010 09:42:01 | 24.551 | 11/30/2010 20:25:00 | 34.0 | 8/9/2010 07:26:01 | 24.7793 |
| 8/8/2010 10:02:01 | 24.551 | 11/30/2010 21:00:00 | 34.0 | 8/9/2010 07:46:01 | 24.7793 |
| 8/8/2010 10:22:01 | 24.489 | 11/30/2010 21:35:00 | 34.0 | 8/9/2010 08:06:01 | 24.7173 |
| 8/8/2010 10:42:01 | 24.489 | 11/30/2010 22:10:00 | 33.5 | 8/9/2010 08:26:01 | 24.7173 |
| 8/8/2010 11:02:01 | 24.489 | 11/30/2010 22:45:00 | 33.5 | 8/9/2010 08:46:01 | 24.7173 |
| 8/8/2010 11:22:01 | 24.489 | 11/30/2010 23:20:00 | 34.0 | 8/9/2010 09:06:01 | 24.7173 |
| 8/8/2010 11:42:01 | 24.426 | 11/30/2010 23:55:00 | 34.0 | 8/9/2010 09:26:01 | 24.7173 |
| 8/8/2010 12:02:01 | 24.426 | 12/1/2010 00:30:00  | 34.0 | 8/9/2010 09:46:01 | 24.7173 |
| 8/8/2010 12:22:01 | 24.426 | 12/1/2010 01:05:00  | 34.5 | 8/9/2010 10:06:01 | 24.7173 |
| 8/8/2010 12:42:01 | 24.426 | 12/1/2010 01:40:00  | 35.0 | 8/9/2010 10:26:01 | 24.6543 |
| 8/8/2010 13:02:01 | 24.364 | 12/1/2010 02:15:00  | 35.0 | 8/9/2010 10:46:01 | 24.6543 |
| 8/8/2010 13:22:01 | 24.364 | 12/1/2010 02:50:00  | 35.0 | 8/9/2010 11:06:01 | 24.6543 |
| 8/8/2010 13:42:01 | 24.364 | 12/1/2010 03:25:00  | 34.5 | 8/9/2010 11:26:01 | 24.6543 |
| 8/8/2010 14:02:01 | 24.364 | 12/1/2010 04:00:00  | 34.5 | 8/9/2010 11:46:01 | 24.6543 |
| 8/8/2010 14:22:01 | 24.426 | 12/1/2010 04:35:00  | 34.5 | 8/9/2010 12:06:01 | 24.5913 |
| 8/8/2010 14:42:01 | 24.426 | 12/1/2010 05:10:00  | 34.5 | 8/9/2010 12:26:01 | 24.5913 |
| 8/8/2010 15:02:01 | 24.426 | 12/1/2010 05:45:00  | 34.0 | 8/9/2010 12:46:01 | 24.5913 |
| 8/8/2010 15:22:01 | 24.426 | 12/1/2010 06:20:00  | 33.5 | 8/9/2010 13:06:01 | 24.5913 |
| 8/8/2010 15:42:01 | 24.489 | 12/1/2010 06:55:00  | 34.0 | 8/9/2010 13:26:01 | 24.5293 |
| 8/8/2010 16:02:01 | 24.489 | 12/1/2010 07:30:00  | 34.0 | 8/9/2010 13:46:01 | 24.5293 |
| 8/8/2010 16:22:01 | 24.551 | 12/1/2010 08:05:00  | 34.0 | 8/9/2010 14:06:01 | 24.5293 |
| 8/8/2010 16:42:01 | 24.551 | 12/1/2010 08:40:00  | 34.0 | 8/9/2010 14:26:01 | 24.5293 |
| 8/8/2010 17:02:01 | 24.614 | 12/1/2010 09:15:00  | 34.0 | 8/9/2010 14:46:01 | 24.5293 |
| 8/8/2010 17:22:01 | 24.614 | 12/1/2010 09:50:00  | 34.0 | 8/9/2010 15:06:01 | 24.5293 |
| 8/8/2010 17:42:01 | 24.676 | 12/1/2010 10:25:00  | 34.0 | 8/9/2010 15:26:01 | 24.5293 |
| 8/8/2010 18:02:01 | 24.676 | 12/1/2010 11:00:00  | 34.0 | 8/9/2010 15:46:01 | 24.4663 |
| 8/8/2010 18:22:01 | 24.739 | 12/1/2010 11:35:00  | 34.0 | 8/9/2010 16:06:01 | 24.4663 |
| 8/8/2010 18:42:01 | 24.739 | 12/1/2010 12:10:00  | 34.0 | 8/9/2010 16:26:01 | 24.4663 |
| 8/8/2010 19:02:01 | 24.801 | 12/1/2010 12:45:00  | 34.0 | 8/9/2010 16:46:01 | 24.4663 |
| 8/8/2010 19:22:01 | 24.801 | 12/1/2010 13:20:00  | 34.0 | 8/9/2010 17:06:01 | 24.4663 |
| 8/8/2010 19:42:01 | 24.864 | 12/1/2010 13:55:00  | 34.0 | 8/9/2010 17:26:01 | 24.4663 |
| 8/8/2010 20:02:01 | 24.864 | 12/1/2010 14:30:00  | 34.5 | 8/9/2010 17:46:01 | 24.4663 |
| 8/8/2010 20:22:01 | 24.864 | 12/1/2010 15:05:00  | 34.0 | 8/9/2010 18:06:01 | 24.4663 |
| 8/8/2010 20:42:01 | 24.926 | 12/1/2010 15:40:00  | 34.0 | 8/9/2010 18:26:01 | 24.4663 |
| 8/8/2010 21:02:01 | 24.926 | 12/1/2010 16:15:00  | 34.5 | 8/9/2010 18:46:01 | 24.4663 |
| 8/8/2010 21:22:01 | 24.926 | 12/1/2010 16:50:00  | 34.5 | 8/9/2010 19:06:01 | 24.5293 |
| 8/8/2010 21:42:01 | 24.989 | 12/1/2010 17:25:00  | 34.5 | 8/9/2010 19:26:01 | 24.5293 |
| 8/8/2010 22:02:01 | 24.989 | 12/1/2010 18:00:00  | 34.5 | 8/9/2010 19:46:01 | 24.5293 |
| 8/8/2010 22:22:01 | 24.989 | 12/1/2010 18:35:00  | 34.0 | 8/9/2010 20:06:01 | 24.5293 |
| 8/8/2010 22:42:01 | 24.989 | 12/1/2010 19:10:00  | 34.0 | 8/9/2010 20:26:01 | 24.5293 |
| 8/8/2010 23:02:01 | 24.989 | 12/1/2010 19:45:00  | 34.0 | 8/9/2010 20:46:01 | 24.5293 |

|                   |        |                    |      |                    |         |
|-------------------|--------|--------------------|------|--------------------|---------|
| 8/8/2010 23:22:01 | 24.989 | 12/1/2010 20:20:00 | 34.5 | 8/9/2010 21:06:01  | 24.5293 |
| 8/8/2010 23:42:01 | 24.989 | 12/1/2010 20:55:00 | 34.5 | 8/9/2010 21:26:01  | 24.5913 |
| 8/9/2010 00:02:01 | 24.989 | 12/1/2010 21:30:00 | 35.0 | 8/9/2010 21:46:01  | 24.5913 |
| 8/9/2010 00:22:01 | 24.989 | 12/1/2010 22:05:00 | 35.0 | 8/9/2010 22:06:01  | 24.5913 |
| 8/9/2010 00:42:01 | 24.989 | 12/1/2010 22:40:00 | 34.5 | 8/9/2010 22:26:01  | 24.5913 |
| 8/9/2010 01:02:01 | 24.989 | 12/1/2010 23:15:00 | 34.5 | 8/9/2010 22:46:01  | 24.5913 |
| 8/9/2010 01:22:01 | 24.989 | 12/1/2010 23:50:00 | 34.5 | 8/9/2010 23:06:01  | 24.5913 |
| 8/9/2010 01:42:01 | 24.989 | 12/2/2010 00:25:00 | 34.5 | 8/9/2010 23:26:01  | 24.6543 |
| 8/9/2010 02:02:01 | 24.989 | 12/2/2010 01:00:00 | 35.0 | 8/9/2010 23:46:01  | 24.6543 |
| 8/9/2010 02:22:01 | 24.926 | 12/2/2010 01:35:00 | 35.0 | 8/10/2010 00:06:01 | 24.6543 |
| 8/9/2010 02:42:01 | 24.926 | 12/2/2010 02:10:00 | 35.0 | 8/10/2010 00:26:01 | 24.6543 |
| 8/9/2010 03:02:01 | 24.926 | 12/2/2010 02:45:00 | 35.0 | 8/10/2010 00:46:01 | 24.6543 |
| 8/9/2010 03:22:01 | 24.926 | 12/2/2010 03:20:00 | 35.0 | 8/10/2010 01:06:01 | 24.6543 |
| 8/9/2010 03:42:01 | 24.864 | 12/2/2010 03:55:00 | 34.5 | 8/10/2010 01:26:01 | 24.7173 |
| 8/9/2010 04:02:01 | 24.864 | 12/2/2010 04:30:00 | 34.5 | 8/10/2010 01:46:01 | 24.7173 |
| 8/9/2010 04:22:01 | 24.864 | 12/2/2010 05:05:00 | 34.5 | 8/10/2010 02:06:01 | 24.7173 |
| 8/9/2010 04:42:01 | 24.864 | 12/2/2010 05:40:00 | 34.5 | 8/10/2010 02:26:01 | 24.7173 |
| 8/9/2010 05:02:01 | 24.801 | 12/2/2010 06:15:00 | 34.0 | 8/10/2010 02:46:01 | 24.7173 |
| 8/9/2010 05:22:01 | 24.801 | 12/2/2010 06:50:00 | 34.0 | 8/10/2010 03:06:01 | 24.7173 |
| 8/9/2010 05:42:01 | 24.801 | 12/2/2010 07:25:00 | 34.0 | 8/10/2010 03:26:01 | 24.7173 |
| 8/9/2010 06:02:01 | 24.739 | 12/2/2010 08:00:00 | 34.0 | 8/10/2010 03:46:01 | 24.7173 |
| 8/9/2010 06:22:01 | 24.739 | 12/2/2010 08:35:00 | 34.0 | 8/10/2010 04:06:01 | 24.7173 |
| 8/9/2010 06:42:01 | 24.739 | 12/2/2010 09:10:00 | 34.0 | 8/10/2010 04:26:01 | 24.7173 |
| 8/9/2010 07:02:01 | 24.676 | 12/2/2010 09:45:00 | 34.0 | 8/10/2010 04:46:01 | 24.7173 |
| 8/9/2010 07:22:01 | 24.676 | 12/2/2010 10:20:00 | 34.0 | 8/10/2010 05:06:01 | 24.7173 |
| 8/9/2010 07:42:01 | 24.676 | 12/2/2010 10:55:00 | 33.5 | 8/10/2010 05:26:01 | 24.7173 |
| 8/9/2010 08:02:01 | 24.614 | 12/2/2010 11:30:00 | 34.0 | 8/10/2010 05:46:01 | 24.7173 |
| 8/9/2010 08:22:01 | 24.614 | 12/2/2010 12:05:00 | 33.5 | 8/10/2010 06:06:01 | 24.7173 |
| 8/9/2010 08:42:01 | 24.551 | 12/2/2010 12:40:00 | 34.0 | 8/10/2010 06:26:01 | 24.7173 |
| 8/9/2010 09:02:01 | 24.551 | 12/2/2010 13:15:00 | 33.5 | 8/10/2010 06:46:01 | 24.7173 |
| 8/9/2010 09:22:01 | 24.489 | 12/2/2010 13:50:00 | 33.5 | 8/10/2010 07:06:01 | 24.7173 |
| 8/9/2010 09:42:01 | 24.489 | 12/2/2010 14:25:00 | 33.5 | 8/10/2010 07:26:01 | 24.7173 |
| 8/9/2010 10:02:01 | 24.489 | 12/2/2010 15:00:00 | 33.5 | 8/10/2010 07:46:01 | 24.7173 |
| 8/9/2010 10:22:01 | 24.426 | 12/2/2010 15:35:00 | 34.0 | 8/10/2010 08:06:01 | 24.7173 |
| 8/9/2010 10:42:01 | 24.426 | 12/2/2010 16:10:00 | 34.0 | 8/10/2010 08:26:01 | 24.7173 |
| 8/9/2010 11:02:01 | 24.364 | 12/2/2010 16:45:00 | 34.0 | 8/10/2010 08:46:01 | 24.7173 |
| 8/9/2010 11:22:01 | 24.364 | 12/2/2010 17:20:00 | 33.5 | 8/10/2010 09:06:01 | 24.7173 |
| 8/9/2010 11:42:01 | 24.301 | 12/2/2010 17:55:00 | 33.5 | 8/10/2010 09:26:01 | 24.7173 |
| 8/9/2010 12:02:01 | 24.301 | 12/2/2010 18:30:00 | 33.5 | 8/10/2010 09:46:01 | 24.7173 |
| 8/9/2010 12:22:01 | 24.301 | 12/2/2010 19:05:00 | 33.5 | 8/10/2010 10:06:01 | 24.7173 |
| 8/9/2010 12:42:01 | 24.239 | 12/2/2010 19:40:00 | 34.0 | 8/10/2010 10:26:01 | 24.7173 |
| 8/9/2010 13:02:01 | 24.239 | 12/2/2010 20:15:00 | 34.5 | 8/10/2010 10:46:01 | 24.7173 |
| 8/9/2010 13:22:01 | 24.239 | 12/2/2010 20:50:00 | 34.5 | 8/10/2010 11:06:01 | 24.7173 |
| 8/9/2010 13:42:01 | 24.239 | 12/2/2010 21:25:00 | 35.0 | 8/10/2010 11:26:01 | 24.7173 |
| 8/9/2010 14:02:01 | 24.239 | 12/2/2010 22:00:00 | 34.5 | 8/10/2010 11:46:01 | 24.6543 |
| 8/9/2010 14:22:01 | 24.239 | 12/2/2010 22:35:00 | 35.0 | 8/10/2010 12:06:01 | 24.6543 |
| 8/9/2010 14:42:01 | 24.239 | 12/2/2010 23:10:00 | 35.0 | 8/10/2010 12:26:01 | 24.6543 |
| 8/9/2010 15:02:01 | 24.239 | 12/2/2010 23:45:00 | 34.5 | 8/10/2010 12:46:01 | 24.6543 |
| 8/9/2010 15:22:01 | 24.301 | 12/3/2010 00:20:00 | 34.5 | 8/10/2010 13:06:01 | 24.6543 |
| 8/9/2010 15:42:01 | 24.301 | 12/3/2010 00:55:00 | 34.5 | 8/10/2010 13:26:01 | 24.6543 |

|                    |        |                    |      |                    |         |
|--------------------|--------|--------------------|------|--------------------|---------|
| 8/9/2010 16:02:01  | 24.301 | 12/3/2010 01:30:00 | 35.0 | 8/10/2010 13:46:01 | 24.6543 |
| 8/9/2010 16:22:01  | 24.364 | 12/3/2010 02:05:00 | 35.0 | 8/10/2010 14:06:01 | 24.6543 |
| 8/9/2010 16:42:01  | 24.364 | 12/3/2010 02:40:00 | 35.5 | 8/10/2010 14:26:01 | 24.6543 |
| 8/9/2010 17:02:01  | 24.426 | 12/3/2010 03:15:00 | 35.0 | 8/10/2010 14:46:01 | 24.5913 |
| 8/9/2010 17:22:01  | 24.489 | 12/3/2010 03:50:00 | 35.5 | 8/10/2010 15:06:01 | 24.6543 |
| 8/9/2010 17:42:01  | 24.489 | 12/3/2010 04:25:00 | 35.0 | 8/10/2010 15:26:01 | 24.5913 |
| 8/9/2010 18:02:01  | 24.489 | 12/3/2010 05:00:00 | 34.5 | 8/10/2010 15:46:01 | 24.6543 |
| 8/9/2010 18:22:01  | 24.551 | 12/3/2010 05:35:00 | 34.5 | 8/10/2010 16:06:01 | 24.6543 |
| 8/9/2010 18:42:01  | 24.614 | 12/3/2010 06:10:00 | 34.5 | 8/10/2010 16:26:01 | 24.6543 |
| 8/9/2010 19:02:01  | 24.614 | 12/3/2010 06:45:00 | 34.0 | 8/10/2010 16:46:01 | 24.6543 |
| 8/9/2010 19:22:01  | 24.676 | 12/3/2010 07:20:00 | 34.0 | 8/10/2010 17:06:01 | 24.6543 |
| 8/9/2010 19:42:01  | 24.676 | 12/3/2010 07:55:00 | 34.0 | 8/10/2010 17:26:01 | 24.6543 |
| 8/9/2010 20:02:01  | 24.739 | 12/3/2010 08:30:00 | 34.0 | 8/10/2010 17:46:01 | 24.6543 |
| 8/9/2010 20:22:01  | 24.739 | 12/3/2010 09:05:00 | 34.0 | 8/10/2010 18:06:01 | 24.6543 |
| 8/9/2010 20:42:01  | 24.739 | 12/3/2010 09:40:00 | 34.0 | 8/10/2010 18:26:01 | 24.6543 |
| 8/9/2010 21:02:01  | 24.801 | 12/3/2010 10:15:00 | 34.0 | 8/10/2010 18:46:01 | 24.6543 |
| 8/9/2010 21:22:01  | 24.801 | 12/3/2010 10:50:00 | 34.0 | 8/10/2010 19:06:01 | 24.6543 |
| 8/9/2010 21:42:01  | 24.801 | 12/3/2010 11:25:00 | 34.0 | 8/10/2010 19:26:01 | 24.7173 |
| 8/9/2010 22:02:01  | 24.801 | 12/3/2010 12:00:00 | 34.0 | 8/10/2010 19:46:01 | 24.7173 |
| 8/9/2010 22:22:01  | 24.864 | 12/3/2010 12:35:00 | 34.0 | 8/10/2010 20:06:01 | 24.7173 |
| 8/9/2010 22:42:01  | 24.864 | 12/3/2010 13:10:00 | 34.0 | 8/10/2010 20:26:01 | 24.7173 |
| 8/9/2010 23:02:01  | 24.864 | 12/3/2010 13:45:00 | 34.0 | 8/10/2010 20:46:01 | 24.7173 |
| 8/9/2010 23:22:01  | 24.864 | 12/3/2010 14:20:00 | 34.0 | 8/10/2010 21:06:01 | 24.7793 |
| 8/9/2010 23:42:01  | 24.864 | 12/3/2010 14:55:00 | 34.0 | 8/10/2010 21:26:01 | 24.7793 |
| 8/10/2010 00:02:01 | 24.864 | 12/3/2010 15:30:00 | 33.5 | 8/10/2010 21:46:01 | 24.7793 |
| 8/10/2010 00:22:01 | 24.864 | 12/3/2010 16:05:00 | 33.5 | 8/10/2010 22:06:01 | 24.7793 |
| 8/10/2010 00:42:01 | 24.864 | 12/3/2010 16:40:00 | 33.5 | 8/10/2010 22:26:01 | 24.8423 |
| 8/10/2010 01:02:01 | 24.864 | 12/3/2010 17:15:00 | 33.5 | 8/10/2010 22:46:01 | 24.8423 |
| 8/10/2010 01:22:01 | 24.864 | 12/3/2010 17:50:00 | 33.5 | 8/10/2010 23:06:01 | 24.8423 |
| 8/10/2010 01:42:01 | 24.864 | 12/3/2010 18:25:00 | 33.5 | 8/10/2010 23:26:01 | 24.8423 |
| 8/10/2010 02:02:01 | 24.864 | 12/3/2010 19:00:00 | 33.0 | 8/10/2010 23:46:01 | 24.9043 |
| 8/10/2010 02:22:01 | 24.864 | 12/3/2010 19:35:00 | 33.0 | 8/11/2010 00:06:01 | 24.9043 |
| 8/10/2010 02:42:01 | 24.864 | 12/3/2010 20:10:00 | 34.0 | 8/11/2010 00:26:01 | 24.9043 |
| 8/10/2010 03:02:01 | 24.864 | 12/3/2010 20:45:00 | 34.5 | 8/11/2010 00:46:01 | 24.9043 |
| 8/10/2010 03:22:01 | 24.864 | 12/3/2010 21:20:00 | 35.0 | 8/11/2010 01:06:01 | 24.9043 |
| 8/10/2010 03:42:01 | 24.864 | 12/3/2010 21:55:00 | 35.0 | 8/11/2010 01:26:01 | 24.9673 |
| 8/10/2010 04:02:01 | 24.864 | 12/3/2010 22:30:00 | 35.0 | 8/11/2010 01:46:01 | 24.9673 |
| 8/10/2010 04:22:01 | 24.801 | 12/3/2010 23:05:00 | 34.5 | 8/11/2010 02:06:01 | 24.9673 |
| 8/10/2010 04:42:01 | 24.801 | 12/3/2010 23:40:00 | 35.0 | 8/11/2010 02:26:01 | 24.9673 |
| 8/10/2010 05:02:01 | 24.801 | 12/4/2010 00:15:00 | 34.5 | 8/11/2010 02:46:01 | 24.9673 |
| 8/10/2010 05:22:01 | 24.801 | 12/4/2010 00:50:00 | 34.5 | 8/11/2010 03:06:01 | 24.9673 |
| 8/10/2010 05:42:01 | 24.801 | 12/4/2010 01:25:00 | 34.5 | 8/11/2010 03:26:01 | 24.9673 |
| 8/10/2010 06:02:01 | 24.801 | 12/4/2010 02:00:00 | 35.0 | 8/11/2010 03:46:01 | 24.9673 |
| 8/10/2010 06:22:01 | 24.739 | 12/4/2010 02:35:00 | 35.0 | 8/11/2010 04:06:01 | 25.0293 |
| 8/10/2010 06:42:01 | 24.739 | 12/4/2010 03:10:00 | 35.0 | 8/11/2010 04:26:01 | 25.0293 |
| 8/10/2010 07:02:01 | 24.739 | 12/4/2010 03:45:00 | 34.5 | 8/11/2010 04:46:01 | 25.0293 |
| 8/10/2010 07:22:01 | 24.739 | 12/4/2010 04:20:00 | 34.5 | 8/11/2010 05:06:01 | 25.0293 |
| 8/10/2010 07:42:01 | 24.739 | 12/4/2010 04:55:00 | 34.5 | 8/11/2010 05:26:01 | 25.0293 |
| 8/10/2010 08:02:01 | 24.739 | 12/4/2010 05:30:00 | 34.5 | 8/11/2010 05:46:01 | 25.0293 |
| 8/10/2010 08:22:01 | 24.676 | 12/4/2010 06:05:00 | 34.5 | 8/11/2010 06:06:01 | 25.0293 |

|                    |        |                    |      |                    |         |
|--------------------|--------|--------------------|------|--------------------|---------|
| 8/10/2010 08:42:01 | 24.676 | 12/4/2010 06:40:00 | 34.5 | 8/11/2010 06:26:01 | 25.0293 |
| 8/10/2010 09:02:01 | 24.676 | 12/4/2010 07:15:00 | 34.5 | 8/11/2010 06:46:01 | 25.0293 |
| 8/10/2010 09:22:01 | 24.676 | 12/4/2010 07:50:00 | 34.5 | 8/11/2010 07:06:01 | 25.0293 |
| 8/10/2010 09:42:01 | 24.614 | 12/4/2010 08:25:00 | 34.5 | 8/11/2010 07:26:01 | 25.0293 |
| 8/10/2010 10:02:01 | 24.614 | 12/4/2010 09:00:00 | 34.0 | 8/11/2010 07:46:01 | 25.0293 |
| 8/10/2010 10:22:01 | 24.614 | 12/4/2010 09:35:00 | 34.0 | 8/11/2010 08:06:01 | 25.0293 |
| 8/10/2010 10:42:01 | 24.551 | 12/4/2010 10:10:00 | 34.0 | 8/11/2010 08:26:01 | 25.0293 |
| 8/10/2010 11:02:01 | 24.551 | 12/4/2010 10:45:00 | 34.0 | 8/11/2010 08:46:01 | 25.0293 |
| 8/10/2010 11:22:01 | 24.551 | 12/4/2010 11:20:00 | 34.0 | 8/11/2010 09:06:01 | 25.0293 |
| 8/10/2010 11:42:01 | 24.551 | 12/4/2010 11:55:00 | 34.0 | 8/11/2010 09:26:01 | 25.0293 |
| 8/10/2010 12:02:01 | 24.489 | 12/4/2010 12:30:00 | 34.0 | 8/11/2010 09:46:01 | 25.0293 |
| 8/10/2010 12:22:01 | 24.489 | 12/4/2010 13:05:00 | 35.0 | 8/11/2010 10:06:01 | 24.9673 |
| 8/10/2010 12:42:01 | 24.489 | 12/4/2010 13:40:00 | 35.0 | 8/11/2010 10:26:01 | 24.9673 |
| 8/10/2010 13:02:01 | 24.489 | 12/4/2010 14:15:00 | 34.5 | 8/11/2010 10:46:01 | 24.9673 |
| 8/10/2010 13:22:01 | 24.489 | 12/4/2010 14:50:00 | 34.5 | 8/11/2010 11:06:01 | 24.9673 |
| 8/10/2010 13:42:01 | 24.489 | 12/4/2010 15:25:00 | 34.5 | 8/11/2010 11:26:01 | 24.9673 |
| 8/10/2010 14:02:01 | 24.489 | 12/4/2010 16:00:00 | 34.0 | 8/11/2010 11:46:01 | 24.9673 |
| 8/10/2010 14:22:01 | 24.489 | 12/4/2010 16:35:00 | 33.5 | 8/11/2010 12:06:01 | 24.9673 |
| 8/10/2010 14:42:01 | 24.489 | 12/4/2010 17:10:00 | 33.5 | 8/11/2010 12:26:01 | 24.9043 |
| 8/10/2010 15:02:01 | 24.551 | 12/4/2010 17:45:00 | 33.5 | 8/11/2010 12:46:01 | 24.9043 |
| 8/10/2010 15:22:01 | 24.551 | 12/4/2010 18:20:00 | 34.0 | 8/11/2010 13:06:01 | 24.9043 |
| 8/10/2010 15:42:01 | 24.614 | 12/4/2010 18:55:00 | 34.0 | 8/11/2010 13:26:01 | 24.9043 |
| 8/10/2010 16:02:01 | 24.614 | 12/4/2010 19:30:00 | 34.5 | 8/11/2010 13:46:01 | 24.9043 |
| 8/10/2010 16:22:01 | 24.676 | 12/4/2010 20:05:00 | 34.0 | 8/11/2010 14:06:01 | 24.9043 |
| 8/10/2010 16:42:01 | 24.676 | 12/4/2010 20:40:00 | 34.0 | 8/11/2010 14:26:01 | 24.9043 |
| 8/10/2010 17:02:01 | 24.739 | 12/4/2010 21:15:00 | 34.5 | 8/11/2010 14:46:01 | 24.9043 |
| 8/10/2010 17:22:01 | 24.739 | 12/4/2010 21:50:00 | 34.5 | 8/11/2010 15:06:01 | 24.9043 |
| 8/10/2010 17:42:01 | 24.801 | 12/4/2010 22:25:00 | 35.0 | 8/11/2010 15:26:01 | 24.9043 |
| 8/10/2010 18:02:01 | 24.864 | 12/4/2010 23:00:00 | 35.0 | 8/11/2010 15:46:01 | 24.9043 |
| 8/10/2010 18:22:01 | 24.864 | 12/4/2010 23:35:00 | 34.5 | 8/11/2010 16:06:01 | 24.9043 |
| 8/10/2010 18:42:01 | 24.926 | 12/5/2010 00:10:00 | 35.0 | 8/11/2010 16:26:01 | 24.9043 |
| 8/10/2010 19:02:01 | 24.989 | 12/5/2010 00:45:00 | 35.5 | 8/11/2010 16:46:01 | 24.9043 |
| 8/10/2010 19:22:01 | 24.989 | 12/5/2010 01:20:00 | 35.0 | 8/11/2010 17:06:01 | 24.9043 |
| 8/10/2010 19:42:01 | 25.051 | 12/5/2010 01:55:00 | 34.5 | 8/11/2010 17:26:01 | 24.9043 |
| 8/10/2010 20:02:01 | 25.051 | 12/5/2010 02:30:00 | 34.5 | 8/11/2010 17:46:01 | 24.9043 |
| 8/10/2010 20:22:01 | 25.114 | 12/5/2010 03:05:00 | 34.5 | 8/11/2010 18:06:01 | 24.9043 |
| 8/10/2010 20:42:01 | 25.114 | 12/5/2010 03:40:00 | 34.0 | 8/11/2010 18:26:01 | 24.9043 |
| 8/10/2010 21:02:01 | 25.176 | 12/5/2010 04:15:00 | 34.0 | 8/11/2010 18:46:01 | 24.9043 |
| 8/10/2010 21:22:01 | 25.176 | 12/5/2010 04:50:00 | 34.0 | 8/11/2010 19:06:01 | 24.9043 |
| 8/10/2010 21:42:01 | 25.176 | 12/5/2010 05:25:00 | 33.5 | 8/11/2010 19:26:01 | 24.9673 |
| 8/10/2010 22:02:01 | 25.239 | 12/5/2010 06:00:00 | 34.0 | 8/11/2010 19:46:01 | 24.9673 |
| 8/10/2010 22:22:01 | 25.239 | 12/5/2010 06:35:00 | 33.5 | 8/11/2010 20:06:01 | 24.9673 |
| 8/10/2010 22:42:01 | 25.239 | 12/5/2010 07:10:00 | 33.0 | 8/11/2010 20:26:01 | 24.9673 |
| 8/10/2010 23:02:01 | 25.239 | 12/5/2010 07:45:00 | 33.0 | 8/11/2010 20:46:01 | 24.9673 |
| 8/10/2010 23:22:01 | 25.239 | 12/5/2010 08:20:00 | 33.0 | 8/11/2010 21:06:01 | 25.0293 |
| 8/10/2010 23:42:01 | 25.239 | 12/5/2010 08:55:00 | 32.5 | 8/11/2010 21:26:01 | 25.0293 |
| 8/11/2010 00:02:01 | 25.239 | 12/5/2010 09:30:00 | 32.5 | 8/11/2010 21:46:01 | 25.0293 |
| 8/11/2010 00:22:01 | 25.239 | 12/5/2010 10:05:00 | 32.5 | 8/11/2010 22:06:01 | 25.0293 |
| 8/11/2010 00:42:01 | 25.239 | 12/5/2010 10:40:00 | 32.5 | 8/11/2010 22:26:01 | 25.0293 |
| 8/11/2010 01:02:01 | 25.301 | 12/5/2010 11:15:00 | 33.0 | 8/11/2010 22:46:01 | 25.0913 |

|                    |        |                    |      |                    |         |
|--------------------|--------|--------------------|------|--------------------|---------|
| 8/11/2010 01:22:01 | 25.239 | 12/5/2010 11:50:00 | 33.5 | 8/11/2010 23:06:01 | 25.0913 |
| 8/11/2010 01:42:01 | 25.239 | 12/5/2010 12:25:00 | 33.5 | 8/11/2010 23:26:01 | 25.0913 |
| 8/11/2010 02:02:01 | 25.239 | 12/5/2010 13:00:00 | 33.5 | 8/11/2010 23:46:01 | 25.0913 |
| 8/11/2010 02:22:01 | 25.239 | 12/5/2010 13:35:00 | 33.5 | 8/12/2010 00:06:01 | 25.1543 |
| 8/11/2010 02:42:01 | 25.239 | 12/5/2010 14:10:00 | 33.5 | 8/12/2010 00:26:01 | 25.1543 |
| 8/11/2010 03:02:01 | 25.239 | 12/5/2010 14:45:00 | 33.5 | 8/12/2010 00:46:01 | 25.1543 |
| 8/11/2010 03:22:01 | 25.239 | 12/5/2010 15:20:00 | 33.5 | 8/12/2010 01:06:01 | 25.1543 |
| 8/11/2010 03:42:01 | 25.239 | 12/5/2010 15:55:00 | 33.5 | 8/12/2010 01:26:01 | 25.1543 |
| 8/11/2010 04:02:01 | 25.239 | 12/5/2010 16:30:00 | 33.5 | 8/12/2010 01:46:01 | 25.1543 |
| 8/11/2010 04:22:01 | 25.239 | 12/5/2010 17:05:00 | 33.5 | 8/12/2010 02:06:01 | 25.1543 |
| 8/11/2010 04:42:01 | 25.176 | 12/5/2010 17:40:00 | 33.5 | 8/12/2010 02:26:01 | 25.1543 |
| 8/11/2010 05:02:01 | 25.176 | 12/5/2010 18:15:00 | 33.5 | 8/12/2010 02:46:01 | 25.2163 |
| 8/11/2010 05:22:01 | 25.176 | 12/5/2010 18:50:00 | 33.0 | 8/12/2010 03:06:01 | 25.1543 |
| 8/11/2010 05:42:01 | 25.176 | 12/5/2010 19:25:00 | 34.0 | 8/12/2010 03:26:01 | 25.2163 |
| 8/11/2010 06:02:01 | 25.114 | 12/5/2010 20:00:00 | 35.0 | 8/12/2010 03:46:01 | 25.2163 |
| 8/11/2010 06:22:01 | 25.114 | 12/5/2010 20:35:00 | 35.0 | 8/12/2010 04:06:01 | 25.2163 |
| 8/11/2010 06:42:01 | 25.114 | 12/5/2010 21:10:00 | 35.5 | 8/12/2010 04:26:01 | 25.2163 |
| 8/11/2010 07:02:01 | 25.114 | 12/5/2010 21:45:00 | 35.5 | 8/12/2010 04:46:01 | 25.2163 |
| 8/11/2010 07:22:01 | 25.051 | 12/5/2010 22:20:00 | 35.5 | 8/12/2010 05:06:01 | 25.2163 |
| 8/11/2010 07:42:01 | 25.051 | 12/5/2010 22:55:00 | 35.0 | 8/12/2010 05:26:01 | 25.2163 |
| 8/11/2010 08:02:01 | 25.051 | 12/5/2010 23:30:00 | 35.0 | 8/12/2010 05:46:01 | 25.2163 |
| 8/11/2010 08:22:01 | 24.989 | 12/6/2010 00:05:00 | 35.0 | 8/12/2010 06:06:01 | 25.2163 |
| 8/11/2010 08:42:01 | 24.989 | 12/6/2010 00:40:00 | 34.5 | 8/12/2010 06:26:01 | 25.2163 |
| 8/11/2010 09:02:01 | 24.989 | 12/6/2010 01:15:00 | 34.5 | 8/12/2010 06:46:01 | 25.2163 |
| 8/11/2010 09:22:01 | 24.926 | 12/6/2010 01:50:00 | 35.0 | 8/12/2010 07:06:01 | 25.2163 |
| 8/11/2010 09:42:01 | 24.926 | 12/6/2010 02:25:00 | 34.5 | 8/12/2010 07:26:01 | 25.2163 |
| 8/11/2010 10:02:01 | 24.926 | 12/6/2010 03:00:00 | 34.5 | 8/12/2010 07:46:01 | 25.2163 |
| 8/11/2010 10:22:01 | 24.864 | 12/6/2010 03:35:00 | 34.0 | 8/12/2010 08:06:01 | 25.2163 |
| 8/11/2010 10:42:01 | 24.864 | 12/6/2010 04:10:00 | 34.5 | 8/12/2010 08:26:01 | 25.2163 |
| 8/11/2010 11:02:01 | 24.801 | 12/6/2010 04:45:00 | 34.0 | 8/12/2010 08:46:01 | 25.2163 |
| 8/11/2010 11:22:01 | 24.801 | 12/6/2010 05:20:00 | 34.0 | 8/12/2010 09:06:01 | 25.2163 |
| 8/11/2010 11:42:01 | 24.801 | 12/6/2010 05:55:00 | 34.0 | 8/12/2010 09:26:01 | 25.1543 |
| 8/11/2010 12:02:01 | 24.801 | 12/6/2010 06:30:00 | 34.0 | 8/12/2010 09:46:01 | 25.1543 |
| 8/11/2010 12:22:01 | 24.739 | 12/6/2010 07:05:00 | 34.0 | 8/12/2010 10:06:01 | 25.1543 |
| 8/11/2010 12:42:01 | 24.739 | 12/6/2010 07:40:00 | 34.0 | 8/12/2010 10:26:01 | 25.1543 |
| 8/11/2010 13:02:01 | 24.739 | 12/6/2010 08:15:00 | 34.0 | 8/12/2010 10:46:01 | 25.1543 |
| 8/11/2010 13:22:01 | 24.739 | 12/6/2010 08:50:00 | 34.0 | 8/12/2010 11:06:01 | 25.1543 |
| 8/11/2010 13:42:01 | 24.739 | 12/6/2010 09:25:00 | 34.0 | 8/12/2010 11:26:01 | 25.1543 |
| 8/11/2010 14:02:01 | 24.739 | 12/6/2010 10:00:00 | 33.5 | 8/12/2010 11:46:01 | 25.1543 |
| 8/11/2010 14:22:01 | 24.739 | 12/6/2010 10:35:00 | 34.0 | 8/12/2010 12:06:01 | 25.1543 |
| 8/11/2010 14:42:01 | 24.739 | 12/6/2010 11:10:00 | 35.5 | 8/12/2010 12:26:01 | 25.1543 |
| 8/11/2010 15:02:01 | 24.739 | 12/6/2010 11:45:00 | 34.5 | 8/12/2010 12:46:01 | 25.1543 |
| 8/11/2010 15:22:01 | 24.801 | 12/6/2010 12:20:00 | 33.5 | 8/12/2010 13:06:01 | 25.0913 |
| 8/11/2010 15:42:01 | 24.801 | 12/6/2010 12:55:00 | 33.5 | 8/12/2010 13:26:01 | 25.0913 |
| 8/11/2010 16:02:01 | 24.864 | 12/6/2010 13:30:00 | 33.0 | 8/12/2010 13:46:01 | 25.0913 |
| 8/11/2010 16:22:01 | 24.864 | 12/6/2010 14:05:00 | 33.5 | 8/12/2010 14:06:01 | 25.0913 |
| 8/11/2010 16:42:01 | 24.926 | 12/6/2010 14:40:00 | 33.5 | 8/12/2010 14:26:01 | 25.0913 |
| 8/11/2010 17:02:01 | 24.926 | 12/6/2010 15:15:00 | 33.5 | 8/12/2010 14:46:01 | 25.0913 |
| 8/11/2010 17:22:01 | 24.989 | 12/6/2010 15:50:00 | 33.5 | 8/12/2010 15:06:01 | 25.0913 |
| 8/11/2010 17:42:01 | 25.051 | 12/6/2010 16:25:00 | 34.0 | 8/12/2010 15:26:01 | 25.0913 |

|                    |        |                    |      |                    |         |
|--------------------|--------|--------------------|------|--------------------|---------|
| 8/11/2010 18:02:01 | 25.051 | 12/6/2010 17:00:00 | 34.0 | 8/12/2010 15:46:01 | 25.0913 |
| 8/11/2010 18:22:01 | 25.114 | 12/6/2010 17:35:00 | 33.5 | 8/12/2010 16:06:01 | 25.0913 |
| 8/11/2010 18:42:01 | 25.114 | 12/6/2010 18:10:00 | 33.5 | 8/12/2010 16:26:01 | 25.0913 |
| 8/11/2010 19:02:01 | 25.176 | 12/6/2010 18:45:00 | 33.5 | 8/12/2010 16:46:01 | 25.0913 |
| 8/11/2010 19:22:01 | 25.176 | 12/6/2010 19:20:00 | 33.5 | 8/12/2010 17:06:01 | 25.0913 |
| 8/11/2010 19:42:01 | 25.239 | 12/6/2010 19:55:00 | 34.0 | 8/12/2010 17:26:01 | 25.0913 |
| 8/11/2010 20:02:01 | 25.239 | 12/6/2010 20:30:00 | 34.5 | 8/12/2010 17:46:01 | 25.0913 |
| 8/11/2010 20:22:01 | 25.301 | 12/6/2010 21:05:00 | 35.0 | 8/12/2010 18:06:01 | 25.0913 |
| 8/11/2010 20:42:01 | 25.301 | 12/6/2010 21:40:00 | 35.0 | 8/12/2010 18:26:01 | 25.0913 |
| 8/11/2010 21:02:01 | 25.364 | 12/6/2010 22:15:00 | 35.0 | 8/12/2010 18:46:01 | 25.0913 |
| 8/11/2010 21:22:01 | 25.364 | 12/6/2010 22:50:00 | 35.0 | 8/12/2010 19:06:01 | 25.0913 |
| 8/11/2010 21:42:01 | 25.364 | 12/6/2010 23:25:00 | 34.5 | 8/12/2010 19:26:01 | 25.0913 |
| 8/11/2010 22:02:01 | 25.364 | 12/7/2010 00:00:00 | 34.5 | 8/12/2010 19:46:01 | 25.1543 |
| 8/11/2010 22:22:01 | 25.426 | 12/7/2010 00:35:00 | 34.5 | 8/12/2010 20:06:01 | 25.1543 |
| 8/11/2010 22:42:01 | 25.426 | 12/7/2010 01:10:00 | 34.5 | 8/12/2010 20:26:01 | 25.1543 |
| 8/11/2010 23:02:01 | 25.426 | 12/7/2010 01:45:00 | 35.0 | 8/12/2010 20:46:01 | 25.1543 |
| 8/11/2010 23:22:01 | 25.426 | 12/7/2010 02:20:00 | 35.0 | 8/12/2010 21:06:01 | 25.1543 |
| 8/11/2010 23:42:01 | 25.426 | 12/7/2010 02:55:00 | 34.5 | 8/12/2010 21:26:01 | 25.2163 |
| 8/12/2010 00:02:01 | 25.426 | 12/7/2010 03:30:00 | 34.5 | 8/12/2010 21:46:01 | 25.2163 |
| 8/12/2010 00:22:01 | 25.426 | 12/7/2010 04:05:00 | 34.5 | 8/12/2010 22:06:01 | 25.2163 |
| 8/12/2010 00:42:01 | 25.426 | 12/7/2010 04:40:00 | 34.0 | 8/12/2010 22:26:01 | 25.2163 |
| 8/12/2010 01:02:01 | 25.426 | 12/7/2010 05:15:00 | 34.0 | 8/12/2010 22:46:01 | 25.2163 |
| 8/12/2010 01:22:01 | 25.426 | 12/7/2010 05:50:00 | 34.0 | 8/12/2010 23:06:01 | 25.2163 |
| 8/12/2010 01:42:01 | 25.426 | 12/7/2010 06:25:00 | 33.5 | 8/12/2010 23:26:01 | 25.2793 |
| 8/12/2010 02:02:01 | 25.426 | 12/7/2010 07:00:00 | 33.5 | 8/12/2010 23:46:01 | 25.2793 |
| 8/12/2010 02:22:01 | 25.364 | 12/7/2010 07:35:00 | 33.5 | 8/13/2010 00:06:01 | 25.2793 |
| 8/12/2010 02:42:01 | 25.364 | 12/7/2010 08:10:00 | 33.5 | 8/13/2010 00:26:01 | 25.2793 |
| 8/12/2010 03:02:01 | 25.364 | 12/7/2010 08:45:00 | 33.5 | 8/13/2010 00:46:01 | 25.2793 |
| 8/12/2010 03:22:01 | 25.364 | 12/7/2010 09:20:00 | 33.5 | 8/13/2010 01:06:01 | 25.2793 |
| 8/12/2010 03:42:01 | 25.364 | 12/7/2010 09:55:00 | 33.5 | 8/13/2010 01:26:01 | 25.2793 |
| 8/12/2010 04:02:01 | 25.364 | 12/7/2010 10:30:00 | 33.5 | 8/13/2010 01:46:01 | 25.2793 |
| 8/12/2010 04:22:01 | 25.301 | 12/7/2010 11:05:00 | 33.5 | 8/13/2010 02:06:01 | 25.2793 |
| 8/12/2010 04:42:01 | 25.301 | 12/7/2010 11:40:00 | 33.5 | 8/13/2010 02:26:01 | 25.2793 |
| 8/12/2010 05:02:01 | 25.301 | 12/7/2010 12:15:00 | 33.5 | 8/13/2010 02:46:01 | 25.2793 |
| 8/12/2010 05:22:01 | 25.301 | 12/7/2010 12:50:00 | 34.0 | 8/13/2010 03:06:01 | 25.2793 |
| 8/12/2010 05:42:01 | 25.301 | 12/7/2010 13:25:00 | 34.0 | 8/13/2010 03:26:01 | 25.2793 |
| 8/12/2010 06:02:01 | 25.239 | 12/7/2010 14:00:00 | 34.0 | 8/13/2010 03:46:01 | 25.2793 |
| 8/12/2010 06:22:01 | 25.239 | 12/7/2010 14:35:00 | 34.0 | 8/13/2010 04:06:01 | 25.2793 |
| 8/12/2010 06:42:01 | 25.239 | 12/7/2010 15:10:00 | 33.5 | 8/13/2010 04:26:01 | 25.2793 |
| 8/12/2010 07:02:01 | 25.239 | 12/7/2010 15:45:00 | 33.0 | 8/13/2010 04:46:01 | 25.2793 |
| 8/12/2010 07:22:01 | 25.176 | 12/7/2010 16:20:00 | 33.0 | 8/13/2010 05:06:01 | 25.2793 |
| 8/12/2010 07:42:01 | 25.176 | 12/7/2010 16:55:00 | 33.0 | 8/13/2010 05:26:01 | 25.2793 |
| 8/12/2010 08:02:01 | 25.176 | 12/7/2010 17:30:00 | 33.0 | 8/13/2010 05:46:01 | 25.2793 |
| 8/12/2010 08:22:01 | 25.176 | 12/7/2010 18:05:00 | 32.5 | 8/13/2010 06:06:01 | 25.2793 |
| 8/12/2010 08:42:01 | 25.114 | 12/7/2010 18:40:00 | 33.0 | 8/13/2010 06:26:01 | 25.2793 |
| 8/12/2010 09:02:01 | 25.114 | 12/7/2010 19:15:00 | 33.0 | 8/13/2010 06:46:01 | 25.2793 |
| 8/12/2010 09:22:01 | 25.114 | 12/7/2010 19:50:00 | 33.5 | 8/13/2010 07:06:01 | 25.2793 |
| 8/12/2010 09:42:01 | 25.114 | 12/7/2010 20:25:00 | 33.5 | 8/13/2010 07:26:01 | 25.2793 |
| 8/12/2010 10:02:01 | 25.051 | 12/7/2010 21:00:00 | 33.5 | 8/13/2010 07:46:01 | 25.2163 |
| 8/12/2010 10:22:01 | 25.051 | 12/7/2010 21:35:00 | 34.0 | 8/13/2010 08:06:01 | 25.2163 |

|                    |        |                    |      |                    |         |
|--------------------|--------|--------------------|------|--------------------|---------|
| 8/12/2010 10:42:01 | 25.051 | 12/7/2010 22:10:00 | 34.0 | 8/13/2010 08:26:01 | 25.2163 |
| 8/12/2010 11:02:01 | 25.051 | 12/7/2010 22:45:00 | 34.0 | 8/13/2010 08:46:01 | 25.2163 |
| 8/12/2010 11:22:01 | 24.989 | 12/7/2010 23:20:00 | 34.0 | 8/13/2010 09:06:01 | 25.2163 |
| 8/12/2010 11:42:01 | 24.989 | 12/7/2010 23:55:00 | 34.5 | 8/13/2010 09:26:01 | 25.1543 |
| 8/12/2010 12:02:01 | 24.989 | 12/8/2010 00:30:00 | 34.5 | 8/13/2010 09:46:01 | 25.1543 |
| 8/12/2010 12:22:01 | 24.989 | 12/8/2010 01:05:00 | 34.5 | 8/13/2010 10:06:01 | 25.1543 |
| 8/12/2010 12:42:01 | 24.989 | 12/8/2010 01:40:00 | 34.5 | 8/13/2010 10:26:01 | 25.1543 |
| 8/12/2010 13:02:01 | 24.989 | 12/8/2010 02:15:00 | 34.5 | 8/13/2010 10:46:01 | 25.1543 |
| 8/12/2010 13:22:01 | 24.926 | 12/8/2010 02:50:00 | 34.5 | 8/13/2010 11:06:01 | 25.0913 |
| 8/12/2010 13:42:01 | 24.926 | 12/8/2010 03:25:00 | 34.5 | 8/13/2010 11:26:01 | 25.0913 |
| 8/12/2010 14:02:01 | 24.989 | 12/8/2010 04:00:00 | 34.5 | 8/13/2010 11:46:01 | 25.0913 |
| 8/12/2010 14:22:01 | 24.989 | 12/8/2010 04:35:00 | 34.5 | 8/13/2010 12:06:01 | 25.0913 |
| 8/12/2010 14:42:01 | 24.989 | 12/8/2010 05:10:00 | 34.0 | 8/13/2010 12:26:01 | 25.0293 |
| 8/12/2010 15:02:01 | 24.989 | 12/8/2010 05:45:00 | 34.0 | 8/13/2010 12:46:01 | 25.0293 |
| 8/12/2010 15:22:01 | 24.989 | 12/8/2010 06:20:00 | 34.0 | 8/13/2010 13:06:01 | 25.0293 |
| 8/12/2010 15:42:01 | 25.051 | 12/8/2010 06:55:00 | 33.5 | 8/13/2010 13:26:01 | 25.0293 |
| 8/12/2010 16:02:01 | 25.051 | 12/8/2010 07:30:00 | 34.0 | 8/13/2010 13:46:01 | 25.0293 |
| 8/12/2010 16:22:01 | 25.114 | 12/8/2010 08:05:00 | 33.5 | 8/13/2010 14:06:01 | 24.9673 |
| 8/12/2010 16:42:01 | 25.114 | 12/8/2010 08:40:00 | 33.5 | 8/13/2010 14:26:01 | 24.9673 |
| 8/12/2010 17:02:01 | 25.176 | 12/8/2010 09:15:00 | 34.0 | 8/13/2010 14:46:01 | 24.9673 |
| 8/12/2010 17:22:01 | 25.176 | 12/8/2010 09:50:00 | 33.5 | 8/13/2010 15:06:01 | 24.9673 |
| 8/12/2010 17:42:01 | 25.239 | 12/8/2010 10:25:00 | 33.5 | 8/13/2010 15:26:01 | 24.9673 |
| 8/12/2010 18:02:01 | 25.239 | 12/8/2010 11:00:00 | 33.5 | 8/13/2010 15:46:01 | 24.9043 |
| 8/12/2010 18:22:01 | 25.239 | 12/8/2010 11:35:00 | 33.5 | 8/13/2010 16:06:01 | 24.9043 |
| 8/12/2010 18:42:01 | 25.301 | 12/8/2010 12:10:00 | 33.5 | 8/13/2010 16:26:01 | 24.9043 |
| 8/12/2010 19:02:01 | 25.301 | 12/8/2010 12:45:00 | 33.5 | 8/13/2010 16:46:01 | 24.9043 |
| 8/12/2010 19:22:01 | 25.364 | 12/8/2010 13:20:00 | 33.5 | 8/13/2010 17:06:01 | 24.9043 |
| 8/12/2010 19:42:01 | 25.364 | 12/8/2010 13:55:00 | 33.5 | 8/13/2010 17:26:01 | 24.9043 |
| 8/12/2010 20:02:01 | 25.364 | 12/8/2010 14:30:00 | 33.0 | 8/13/2010 17:46:01 | 24.9043 |
| 8/12/2010 20:22:01 | 25.426 | 12/8/2010 15:05:00 | 33.5 | 8/13/2010 18:06:01 | 24.9043 |
| 8/12/2010 20:42:01 | 25.426 | 12/8/2010 15:40:00 | 33.5 | 8/13/2010 18:26:01 | 24.9043 |
| 8/12/2010 21:02:01 | 25.426 | 12/8/2010 16:15:00 | 33.5 | 8/13/2010 18:46:01 | 24.9043 |
| 8/12/2010 21:22:01 | 25.489 | 12/8/2010 16:50:00 | 33.0 | 8/13/2010 19:06:01 | 24.9043 |
| 8/12/2010 21:42:01 | 25.489 | 12/8/2010 17:25:00 | 33.0 | 8/13/2010 19:26:01 | 24.9043 |
| 8/12/2010 22:02:01 | 25.489 | 12/8/2010 18:00:00 | 33.0 | 8/13/2010 19:46:01 | 24.9043 |
| 8/12/2010 22:22:01 | 25.489 | 12/8/2010 18:35:00 | 33.0 | 8/13/2010 20:06:01 | 24.9043 |
| 8/12/2010 22:42:01 | 25.489 | 12/8/2010 19:10:00 | 33.0 | 8/13/2010 20:26:01 | 24.9043 |
| 8/12/2010 23:02:01 | 25.489 | 12/8/2010 19:45:00 | 33.5 | 8/13/2010 20:46:01 | 24.9673 |
| 8/12/2010 23:22:01 | 25.489 | 12/8/2010 20:20:00 | 33.5 | 8/13/2010 21:06:01 | 24.9673 |
| 8/12/2010 23:42:01 | 25.489 | 12/8/2010 20:55:00 | 33.5 | 8/13/2010 21:26:01 | 24.9673 |
| 8/13/2010 00:02:01 | 25.489 | 12/8/2010 21:30:00 | 33.5 | 8/13/2010 21:46:01 | 24.9673 |
| 8/13/2010 00:22:01 | 25.489 | 12/8/2010 22:05:00 | 33.5 | 8/13/2010 22:06:01 | 24.9673 |
| 8/13/2010 00:42:01 | 25.489 | 12/8/2010 22:40:00 | 33.5 | 8/13/2010 22:26:01 | 24.9673 |
| 8/13/2010 01:02:01 | 25.489 | 12/8/2010 23:15:00 | 34.0 | 8/13/2010 22:46:01 | 24.9673 |
| 8/13/2010 01:22:01 | 25.489 | 12/8/2010 23:50:00 | 34.5 | 8/13/2010 23:06:01 | 24.9673 |
| 8/13/2010 01:42:01 | 25.426 | 12/9/2010 00:25:00 | 34.0 | 8/13/2010 23:26:01 | 25.0293 |
| 8/13/2010 02:02:01 | 25.426 | 12/9/2010 01:00:00 | 34.0 | 8/13/2010 23:46:01 | 25.0293 |
| 8/13/2010 02:22:01 | 25.426 | 12/9/2010 01:35:00 | 34.5 | 8/14/2010 00:06:01 | 25.0293 |
| 8/13/2010 02:42:01 | 25.426 | 12/9/2010 02:10:00 | 34.0 | 8/14/2010 00:26:01 | 25.0293 |
| 8/13/2010 03:02:01 | 25.364 | 12/9/2010 02:45:00 | 34.0 | 8/14/2010 00:46:01 | 25.0293 |

|                    |        |                    |      |                    |         |
|--------------------|--------|--------------------|------|--------------------|---------|
| 8/13/2010 03:22:01 | 25.364 | 12/9/2010 03:20:00 | 34.0 | 8/14/2010 01:06:01 | 25.0293 |
| 8/13/2010 03:42:01 | 25.364 | 12/9/2010 03:55:00 | 34.0 | 8/14/2010 01:26:01 | 25.0293 |
| 8/13/2010 04:02:01 | 25.364 | 12/9/2010 04:30:00 | 33.5 | 8/14/2010 01:46:01 | 25.0293 |
| 8/13/2010 04:22:01 | 25.301 | 12/9/2010 05:05:00 | 33.5 | 8/14/2010 02:06:01 | 25.0293 |
| 8/13/2010 04:42:01 | 25.301 | 12/9/2010 05:40:00 | 33.5 | 8/14/2010 02:26:01 | 25.0293 |
| 8/13/2010 05:02:01 | 25.301 | 12/9/2010 06:15:00 | 33.0 | 8/14/2010 02:46:01 | 25.0293 |
| 8/13/2010 05:22:01 | 25.239 | 12/9/2010 06:50:00 | 33.0 | 8/14/2010 03:06:01 | 25.0293 |
| 8/13/2010 05:42:01 | 25.239 | 12/9/2010 07:25:00 | 33.0 | 8/14/2010 03:26:01 | 25.0293 |
| 8/13/2010 06:02:01 | 25.239 | 12/9/2010 08:00:00 | 33.0 | 8/14/2010 03:46:01 | 25.0293 |
| 8/13/2010 06:22:01 | 25.176 | 12/9/2010 08:35:00 | 33.0 | 8/14/2010 04:06:01 | 25.0293 |
| 8/13/2010 06:42:01 | 25.176 | 12/9/2010 09:10:00 | 32.5 | 8/14/2010 04:26:01 | 25.0293 |
| 8/13/2010 07:02:01 | 25.176 | 12/9/2010 09:45:00 | 33.5 | 8/14/2010 04:46:01 | 25.0293 |
| 8/13/2010 07:22:01 | 25.114 | 12/9/2010 10:20:00 | 33.5 | 8/14/2010 05:06:01 | 25.0293 |
| 8/13/2010 07:42:01 | 25.114 | 12/9/2010 10:55:00 | 33.5 | 8/14/2010 05:26:01 | 25.0293 |
| 8/13/2010 08:02:01 | 25.051 |                    |      | 8/14/2010 05:46:01 | 25.0293 |
| 8/13/2010 08:22:01 | 25.051 |                    |      | 8/14/2010 06:06:01 | 25.0293 |
| 8/13/2010 08:42:01 | 24.989 |                    |      | 8/14/2010 06:26:01 | 25.0293 |
| 8/13/2010 09:02:01 | 24.989 |                    |      | 8/14/2010 06:46:01 | 25.0293 |
| 8/13/2010 09:22:01 | 24.989 |                    |      | 8/14/2010 07:06:01 | 24.9673 |
| 8/13/2010 09:42:01 | 24.926 |                    |      | 8/14/2010 07:26:01 | 24.9673 |
| 8/13/2010 10:02:01 | 24.926 |                    |      | 8/14/2010 07:46:01 | 24.9673 |
| 8/13/2010 10:22:01 | 24.864 |                    |      | 8/14/2010 08:06:01 | 24.9673 |
| 8/13/2010 10:42:01 | 24.864 |                    |      | 8/14/2010 08:26:01 | 24.9673 |
| 8/13/2010 11:02:01 | 24.801 |                    |      | 8/14/2010 08:46:01 | 24.9673 |
| 8/13/2010 11:22:01 | 24.801 |                    |      | 8/14/2010 09:06:01 | 24.9043 |
| 8/13/2010 11:42:01 | 24.801 |                    |      | 8/14/2010 09:26:01 | 24.9043 |
| 8/13/2010 12:02:01 | 24.801 |                    |      | 8/14/2010 09:46:01 | 24.9043 |
| 8/13/2010 12:22:01 | 24.739 |                    |      | 8/14/2010 10:06:01 | 24.9043 |
| 8/13/2010 12:42:01 | 24.739 |                    |      | 8/14/2010 10:26:01 | 24.9043 |
| 8/13/2010 13:02:01 | 24.739 |                    |      | 8/14/2010 10:46:01 | 24.8423 |
| 8/13/2010 13:22:01 | 24.739 |                    |      | 8/14/2010 11:06:01 | 24.8423 |
| 8/13/2010 13:42:01 | 24.676 |                    |      | 8/14/2010 11:26:01 | 24.8423 |
| 8/13/2010 14:02:01 | 24.676 |                    |      | 8/14/2010 11:46:01 | 24.8423 |
| 8/13/2010 14:22:01 | 24.676 |                    |      | 8/14/2010 12:06:01 | 24.7793 |
| 8/13/2010 14:42:01 | 24.739 |                    |      | 8/14/2010 12:26:01 | 24.7793 |
| 8/13/2010 15:02:01 | 24.739 |                    |      | 8/14/2010 12:46:01 | 24.7793 |
| 8/13/2010 15:22:01 | 24.739 |                    |      | 8/14/2010 13:06:01 | 24.7793 |
| 8/13/2010 15:42:01 | 24.739 |                    |      | 8/14/2010 13:26:01 | 24.7173 |
| 8/13/2010 16:02:01 | 24.801 |                    |      | 8/14/2010 13:46:01 | 24.7173 |
| 8/13/2010 16:22:01 | 24.801 |                    |      | 8/14/2010 14:06:01 | 24.7173 |
| 8/13/2010 16:42:01 | 24.864 |                    |      | 8/14/2010 14:26:01 | 24.7173 |
| 8/13/2010 17:02:01 | 24.864 |                    |      | 8/14/2010 14:46:01 | 24.7173 |
| 8/13/2010 17:22:01 | 24.926 |                    |      | 8/14/2010 15:06:01 | 24.6543 |
| 8/13/2010 17:42:01 | 24.926 |                    |      | 8/14/2010 15:26:01 | 24.6543 |
| 8/13/2010 18:02:01 | 24.989 |                    |      | 8/14/2010 15:46:01 | 24.6543 |
| 8/13/2010 18:22:01 | 24.989 |                    |      | 8/14/2010 16:06:01 | 24.6543 |
| 8/13/2010 18:42:01 | 25.051 |                    |      | 8/14/2010 16:26:01 | 24.6543 |
| 8/13/2010 19:02:01 | 25.051 |                    |      | 8/14/2010 16:46:01 | 24.6543 |
| 8/13/2010 19:22:01 | 25.114 |                    |      | 8/14/2010 17:06:01 | 24.6543 |
| 8/13/2010 19:42:01 | 25.114 |                    |      | 8/14/2010 17:26:01 | 24.6543 |



|                    |        |                    |         |
|--------------------|--------|--------------------|---------|
| 8/13/2010 20:02:01 | 25.114 | 8/14/2010 17:46:01 | 24.6543 |
| 8/13/2010 20:22:01 | 25.176 | 8/14/2010 18:06:01 | 24.6543 |
| 8/13/2010 20:42:01 | 25.176 | 8/14/2010 18:26:01 | 24.6543 |
| 8/13/2010 21:02:01 | 25.176 | 8/14/2010 18:46:01 | 24.6543 |
| 8/13/2010 21:22:01 | 25.239 | 8/14/2010 19:06:01 | 24.6543 |
| 8/13/2010 21:42:01 | 25.239 | 8/14/2010 19:26:01 | 24.6543 |
| 8/13/2010 22:02:01 | 25.239 | 8/14/2010 19:46:01 | 24.6543 |
| 8/13/2010 22:22:01 | 25.239 | 8/14/2010 20:06:01 | 24.7173 |
| 8/13/2010 22:42:01 | 25.239 | 8/14/2010 20:26:01 | 24.7173 |
| 8/13/2010 23:02:01 | 25.239 | 8/14/2010 20:46:01 | 24.7173 |
| 8/13/2010 23:22:01 | 25.239 | 8/14/2010 21:06:01 | 24.7173 |
| 8/13/2010 23:42:01 | 25.239 | 8/14/2010 21:26:01 | 24.7173 |
| 8/14/2010 00:02:01 | 25.239 | 8/14/2010 21:46:01 | 24.7173 |
| 8/14/2010 00:22:01 | 25.239 | 8/14/2010 22:06:01 | 24.7173 |
| 8/14/2010 00:42:01 | 25.239 | 8/14/2010 22:26:01 | 24.7793 |
| 8/14/2010 01:02:01 | 25.239 | 8/14/2010 22:46:01 | 24.7793 |
| 8/14/2010 01:22:01 | 25.239 | 8/14/2010 23:06:01 | 24.7793 |
| 8/14/2010 01:42:01 | 25.239 | 8/14/2010 23:26:01 | 24.7793 |
| 8/14/2010 02:02:01 | 25.239 | 8/14/2010 23:46:01 | 24.7793 |
| 8/14/2010 02:22:01 | 25.176 | 8/15/2010 00:06:01 | 24.7793 |
| 8/14/2010 02:42:01 | 25.176 | 8/15/2010 00:26:01 | 24.7793 |
| 8/14/2010 03:02:01 | 25.176 | 8/15/2010 00:46:01 | 24.7793 |
| 8/14/2010 03:22:01 | 25.176 | 8/15/2010 01:06:01 | 24.7793 |
| 8/14/2010 03:42:01 | 25.114 | 8/15/2010 01:26:01 | 24.7793 |
| 8/14/2010 04:02:01 | 25.114 | 8/15/2010 01:46:01 | 24.8423 |
| 8/14/2010 04:22:01 | 25.114 | 8/15/2010 02:06:01 | 24.8423 |
| 8/14/2010 04:42:01 | 25.114 | 8/15/2010 02:26:01 | 24.8423 |
| 8/14/2010 05:02:01 | 25.051 | 8/15/2010 02:46:01 | 24.8423 |
| 8/14/2010 05:22:01 | 25.051 | 8/15/2010 03:06:01 | 24.8423 |
| 8/14/2010 05:42:01 | 25.051 | 8/15/2010 03:26:01 | 24.8423 |
| 8/14/2010 06:02:01 | 24.989 | 8/15/2010 03:46:01 | 24.8423 |
| 8/14/2010 06:22:01 | 24.989 | 8/15/2010 04:06:01 | 24.8423 |
| 8/14/2010 06:42:01 | 24.989 | 8/15/2010 04:26:01 | 24.8423 |
| 8/14/2010 07:02:01 | 24.926 | 8/15/2010 04:46:01 | 24.7793 |
| 8/14/2010 07:22:01 | 24.926 | 8/15/2010 05:06:01 | 24.7793 |
| 8/14/2010 07:42:01 | 24.864 | 8/15/2010 05:26:01 | 24.7793 |
| 8/14/2010 08:02:01 | 24.864 | 8/15/2010 05:46:01 | 24.7793 |
| 8/14/2010 08:22:01 | 24.801 | 8/15/2010 06:06:01 | 24.7793 |
| 8/14/2010 08:42:01 | 24.801 | 8/15/2010 06:26:01 | 24.7793 |
| 8/14/2010 09:02:01 | 24.739 | 8/15/2010 06:46:01 | 24.7793 |
| 8/14/2010 09:22:01 | 24.739 | 8/15/2010 07:06:01 | 24.7793 |
| 8/14/2010 09:42:01 | 24.676 | 8/15/2010 07:26:01 | 24.7793 |
| 8/14/2010 10:02:01 | 24.676 | 8/15/2010 07:46:01 | 24.7173 |
| 8/14/2010 10:22:01 | 24.614 | 8/15/2010 08:06:01 | 24.7173 |
| 8/14/2010 10:42:01 | 24.614 | 8/15/2010 08:26:01 | 24.7173 |
| 8/14/2010 11:02:01 | 24.551 | 8/15/2010 08:46:01 | 24.7173 |
| 8/14/2010 11:22:01 | 24.551 | 8/15/2010 09:06:01 | 24.7173 |
| 8/14/2010 11:42:01 | 24.551 | 8/15/2010 09:26:01 | 24.7173 |
| 8/14/2010 12:02:01 | 24.489 | 8/15/2010 09:46:01 | 24.7173 |
| 8/14/2010 12:22:01 | 24.489 | 8/15/2010 10:06:01 | 24.6543 |

|                    |        |                    |         |
|--------------------|--------|--------------------|---------|
| 8/14/2010 12:42:01 | 24.489 | 8/15/2010 10:26:01 | 24.6543 |
| 8/14/2010 13:02:01 | 24.426 | 8/15/2010 10:46:01 | 24.6543 |
| 8/14/2010 13:22:01 | 24.426 | 8/15/2010 11:06:01 | 24.6543 |
| 8/14/2010 13:42:01 | 24.426 | 8/15/2010 11:26:01 | 24.5913 |
| 8/14/2010 14:02:01 | 24.426 | 8/15/2010 11:46:01 | 24.5913 |
| 8/14/2010 14:22:01 | 24.426 | 8/15/2010 12:06:01 | 24.5913 |
| 8/14/2010 14:42:01 | 24.426 | 8/15/2010 12:26:01 | 24.5913 |
| 8/14/2010 15:02:01 | 24.426 | 8/15/2010 12:46:01 | 24.5913 |
| 8/14/2010 15:22:01 | 24.426 | 8/15/2010 13:06:01 | 24.5293 |
| 8/14/2010 15:42:01 | 24.489 | 8/15/2010 13:26:01 | 24.5293 |
| 8/14/2010 16:02:01 | 24.489 | 8/15/2010 13:46:01 | 24.5293 |
| 8/14/2010 16:22:01 | 24.551 | 8/15/2010 14:06:01 | 24.5293 |
| 8/14/2010 16:42:01 | 24.551 | 8/15/2010 14:26:01 | 24.5293 |
| 8/14/2010 17:02:01 | 24.614 | 8/15/2010 14:46:01 | 24.4663 |
| 8/14/2010 17:22:01 | 24.614 | 8/15/2010 15:06:01 | 24.4663 |
| 8/14/2010 17:42:01 | 24.676 | 8/15/2010 15:26:01 | 24.4663 |
| 8/14/2010 18:02:01 | 24.739 | 8/15/2010 15:46:01 | 24.4663 |
| 8/14/2010 18:22:01 | 24.739 | 8/15/2010 16:06:01 | 24.4663 |
| 8/14/2010 18:42:01 | 24.801 | 8/15/2010 16:26:01 | 24.4663 |
| 8/14/2010 19:02:01 | 24.801 | 8/15/2010 16:46:01 | 24.4663 |
| 8/14/2010 19:22:01 | 24.864 | 8/15/2010 17:06:01 | 24.4663 |
| 8/14/2010 19:42:01 | 24.864 | 8/15/2010 17:26:01 | 24.4663 |
| 8/14/2010 20:02:01 | 24.926 | 8/15/2010 17:46:01 | 24.4663 |
| 8/14/2010 20:22:01 | 24.926 | 8/15/2010 18:06:01 | 24.4663 |
| 8/14/2010 20:42:01 | 24.989 | 8/15/2010 18:26:01 | 24.4663 |
| 8/14/2010 21:02:01 | 24.989 | 8/15/2010 18:46:01 | 24.5293 |
| 8/14/2010 21:22:01 | 24.989 | 8/15/2010 19:06:01 | 24.5293 |
| 8/14/2010 21:42:01 | 24.989 | 8/15/2010 19:26:01 | 24.5293 |
| 8/14/2010 22:02:01 | 24.989 | 8/15/2010 19:46:01 | 24.5293 |
| 8/14/2010 22:22:01 | 25.051 | 8/15/2010 20:06:01 | 24.5293 |
| 8/14/2010 22:42:01 | 25.051 | 8/15/2010 20:26:01 | 24.5293 |
| 8/14/2010 23:02:01 | 25.051 | 8/15/2010 20:46:01 | 24.5293 |
| 8/14/2010 23:22:01 | 25.051 | 8/15/2010 21:06:01 | 24.5913 |
| 8/14/2010 23:42:01 | 25.051 | 8/15/2010 21:26:01 | 24.5913 |
| 8/15/2010 00:02:01 | 24.989 | 8/15/2010 21:46:01 | 24.5913 |
| 8/15/2010 00:22:01 | 24.989 | 8/15/2010 22:06:01 | 24.5913 |
| 8/15/2010 00:42:01 | 24.989 | 8/15/2010 22:26:01 | 24.5913 |
| 8/15/2010 01:02:01 | 24.989 | 8/15/2010 22:46:01 | 24.6543 |
| 8/15/2010 01:22:01 | 24.989 | 8/15/2010 23:06:01 | 24.6543 |
| 8/15/2010 01:42:01 | 24.989 | 8/15/2010 23:26:01 | 24.6543 |
| 8/15/2010 02:02:01 | 24.926 | 8/15/2010 23:46:01 | 24.6543 |
| 8/15/2010 02:22:01 | 24.926 | 8/16/2010 00:06:01 | 24.6543 |
| 8/15/2010 02:42:01 | 24.926 | 8/16/2010 00:26:01 | 24.6543 |
| 8/15/2010 03:02:01 | 24.926 | 8/16/2010 00:46:01 | 24.6543 |
| 8/15/2010 03:22:01 | 24.864 | 8/16/2010 01:06:01 | 24.7173 |
| 8/15/2010 03:42:01 | 24.864 | 8/16/2010 01:26:01 | 24.7173 |
| 8/15/2010 04:02:01 | 24.864 | 8/16/2010 01:46:01 | 24.7173 |
| 8/15/2010 04:22:01 | 24.801 | 8/16/2010 02:06:01 | 24.7173 |
| 8/15/2010 04:42:01 | 24.801 | 8/16/2010 02:26:01 | 24.7173 |
| 8/15/2010 05:02:01 | 24.801 | 8/16/2010 02:46:01 | 24.7173 |

|                    |        |                    |         |
|--------------------|--------|--------------------|---------|
| 8/15/2010 05:22:01 | 24.739 | 8/16/2010 03:06:01 | 24.7173 |
| 8/15/2010 05:42:01 | 24.739 | 8/16/2010 03:26:01 | 24.7173 |
| 8/15/2010 06:02:01 | 24.739 | 8/16/2010 03:46:01 | 24.7173 |
| 8/15/2010 06:22:01 | 24.676 | 8/16/2010 04:06:01 | 24.7173 |
| 8/15/2010 06:42:01 | 24.676 | 8/16/2010 04:26:01 | 24.7173 |
| 8/15/2010 07:02:01 | 24.676 | 8/16/2010 04:46:01 | 24.7173 |
| 8/15/2010 07:22:01 | 24.614 | 8/16/2010 05:06:01 | 24.6543 |
| 8/15/2010 07:42:01 | 24.614 | 8/16/2010 05:26:01 | 24.6543 |
| 8/15/2010 08:02:01 | 24.551 | 8/16/2010 05:46:01 | 24.6543 |
| 8/15/2010 08:22:01 | 24.551 | 8/16/2010 06:06:01 | 24.6543 |
| 8/15/2010 08:42:01 | 24.551 | 8/16/2010 06:26:01 | 24.6543 |
| 8/15/2010 09:02:01 | 24.489 | 8/16/2010 06:46:01 | 24.6543 |
| 8/15/2010 09:22:01 | 24.489 | 8/16/2010 07:06:01 | 24.6543 |
| 8/15/2010 09:42:01 | 24.489 | 8/16/2010 07:26:01 | 24.6543 |
| 8/15/2010 10:02:01 | 24.426 | 8/16/2010 07:46:01 | 24.5913 |
| 8/15/2010 10:22:01 | 24.426 | 8/16/2010 08:06:01 | 24.5913 |
| 8/15/2010 10:42:01 | 24.426 | 8/16/2010 08:26:01 | 24.5913 |
| 8/15/2010 11:02:01 | 24.364 | 8/16/2010 08:46:01 | 24.5913 |
| 8/15/2010 11:22:01 | 24.364 | 8/16/2010 09:06:01 | 24.5913 |
| 8/15/2010 11:42:01 | 24.364 | 8/16/2010 09:26:01 | 24.5913 |
| 8/15/2010 12:02:01 | 24.301 | 8/16/2010 09:46:01 | 24.5293 |
| 8/15/2010 12:22:01 | 24.301 | 8/16/2010 10:06:01 | 24.5293 |
| 8/15/2010 12:42:01 | 24.301 | 8/16/2010 10:26:01 | 24.5293 |
| 8/15/2010 13:02:01 | 24.301 | 8/16/2010 10:49:01 | 24.082  |
| 8/15/2010 13:22:01 | 24.301 | 8/16/2010 11:09:01 | 24.082  |
| 8/15/2010 13:42:01 | 24.239 | 8/16/2010 11:29:01 | 24.082  |
| 8/15/2010 14:02:01 | 24.239 | 8/16/2010 11:49:01 | 24.082  |
| 8/15/2010 14:22:01 | 24.301 | 8/16/2010 12:09:01 | 24.02   |
| 8/15/2010 14:42:01 | 24.301 | 8/16/2010 12:29:01 | 24.02   |
| 8/15/2010 15:02:01 | 24.301 | 8/16/2010 12:49:01 | 24.02   |
| 8/15/2010 15:22:01 | 24.301 | 8/16/2010 13:09:01 | 24.02   |
| 8/15/2010 15:42:01 | 24.364 | 8/16/2010 13:29:01 | 24.02   |
| 8/15/2010 16:02:01 | 24.364 | 8/16/2010 13:49:01 | 23.957  |
| 8/15/2010 16:22:01 | 24.426 | 8/16/2010 14:09:01 | 23.957  |
| 8/15/2010 16:42:01 | 24.426 | 8/16/2010 14:29:01 | 23.957  |
| 8/15/2010 17:02:01 | 24.489 | 8/16/2010 14:49:01 | 23.957  |
| 8/15/2010 17:22:01 | 24.551 | 8/16/2010 15:09:01 | 23.957  |
| 8/15/2010 17:42:01 | 24.551 | 8/16/2010 15:29:01 | 23.957  |
| 8/15/2010 18:02:01 | 24.614 | 8/16/2010 15:49:01 | 23.957  |
| 8/15/2010 18:22:01 | 24.676 | 8/16/2010 16:09:01 | 23.895  |
| 8/15/2010 18:42:01 | 24.676 | 8/16/2010 16:29:01 | 23.895  |
| 8/15/2010 19:02:01 | 24.739 | 8/16/2010 16:49:01 | 23.895  |
| 8/15/2010 19:22:01 | 24.739 | 8/16/2010 17:09:01 | 23.895  |
| 8/15/2010 19:42:01 | 24.801 | 8/16/2010 17:29:01 | 23.895  |
| 8/15/2010 20:02:01 | 24.801 | 8/16/2010 17:49:01 | 23.895  |
| 8/15/2010 20:22:01 | 24.864 | 8/16/2010 18:09:01 | 23.957  |
| 8/15/2010 20:42:01 | 24.864 | 8/16/2010 18:29:01 | 23.957  |
| 8/15/2010 21:02:01 | 24.926 | 8/16/2010 18:49:01 | 23.957  |
| 8/15/2010 21:22:01 | 24.926 | 8/16/2010 19:09:01 | 23.957  |
| 8/15/2010 21:42:01 | 24.926 | 8/16/2010 19:29:01 | 23.957  |

|                    |        |                    |        |
|--------------------|--------|--------------------|--------|
| 8/15/2010 22:02:01 | 24.926 | 8/16/2010 19:49:01 | 23.957 |
| 8/15/2010 22:22:01 | 24.926 | 8/16/2010 20:09:01 | 23.957 |
| 8/15/2010 22:42:01 | 24.926 | 8/16/2010 20:29:01 | 23.957 |
| 8/15/2010 23:02:01 | 24.926 | 8/16/2010 20:49:01 | 24.02  |
| 8/15/2010 23:22:01 | 24.926 | 8/16/2010 21:09:01 | 24.02  |
| 8/15/2010 23:42:01 | 24.926 | 8/16/2010 21:29:01 | 24.02  |
| 8/16/2010 00:02:01 | 24.926 | 8/16/2010 21:49:01 | 24.02  |
| 8/16/2010 00:22:01 | 24.926 | 8/16/2010 22:09:01 | 24.082 |
| 8/16/2010 00:42:01 | 24.926 | 8/16/2010 22:29:01 | 24.082 |
| 8/16/2010 01:02:01 | 24.926 | 8/16/2010 22:49:01 | 24.082 |
| 8/16/2010 01:22:01 | 24.926 | 8/16/2010 23:09:01 | 24.082 |
| 8/16/2010 01:42:01 | 24.864 | 8/16/2010 23:29:01 | 24.082 |
| 8/16/2010 02:02:01 | 24.864 | 8/16/2010 23:49:01 | 24.145 |
| 8/16/2010 02:22:01 | 24.864 | 8/17/2010 00:09:01 | 24.145 |
| 8/16/2010 02:42:01 | 24.801 | 8/17/2010 00:29:01 | 24.145 |
| 8/16/2010 03:02:01 | 24.801 | 8/17/2010 00:49:01 | 24.145 |
| 8/16/2010 03:22:01 | 24.801 | 8/17/2010 01:09:01 | 24.145 |
| 8/16/2010 03:42:01 | 24.801 | 8/17/2010 01:29:01 | 24.145 |
| 8/16/2010 04:02:01 | 24.739 | 8/17/2010 01:49:01 | 24.207 |
| 8/16/2010 04:22:01 | 24.739 | 8/17/2010 02:09:01 | 24.207 |
| 8/16/2010 04:42:01 | 24.676 | 8/17/2010 02:29:01 | 24.207 |
| 8/16/2010 05:02:01 | 24.676 | 8/17/2010 02:49:01 | 24.207 |
| 8/16/2010 05:22:01 | 24.676 | 8/17/2010 03:09:01 | 24.207 |
| 8/16/2010 05:42:01 | 24.614 | 8/17/2010 03:29:01 | 24.207 |
| 8/16/2010 06:02:01 | 24.614 | 8/17/2010 03:49:01 | 24.207 |
| 8/16/2010 06:22:01 | 24.551 | 8/17/2010 04:09:01 | 24.207 |
| 8/16/2010 06:42:01 | 24.551 | 8/17/2010 04:29:01 | 24.207 |
| 8/16/2010 07:02:01 | 24.489 | 8/17/2010 04:49:01 | 24.207 |
| 8/16/2010 07:22:01 | 24.489 | 8/17/2010 05:09:01 | 24.207 |
| 8/16/2010 07:42:01 | 24.489 | 8/17/2010 05:29:01 | 24.207 |
| 8/16/2010 08:02:01 | 24.426 | 8/17/2010 05:49:01 | 24.207 |
| 8/16/2010 08:22:01 | 24.426 | 8/17/2010 06:09:01 | 24.207 |
| 8/16/2010 08:42:01 | 24.364 | 8/17/2010 06:29:01 | 24.207 |
| 8/16/2010 09:02:01 | 24.364 | 8/17/2010 06:49:01 | 24.207 |
| 8/16/2010 09:22:01 | 24.301 | 8/17/2010 07:09:01 | 24.207 |
| 8/16/2010 09:42:01 | 24.301 | 8/17/2010 07:29:01 | 24.207 |
| 8/16/2010 10:02:01 | 24.239 | 8/17/2010 07:49:01 | 24.207 |
| 8/16/2010 10:22:01 | 24.239 | 8/17/2010 08:09:01 | 24.207 |
| 8/16/2010 10:42:01 | 24.176 | 8/17/2010 08:29:01 | 24.207 |
| 8/16/2010 11:09:01 | 24.111 | 8/17/2010 08:49:01 | 24.207 |
| 8/16/2010 11:29:01 | 24.111 | 8/17/2010 09:09:01 | 24.145 |
| 8/16/2010 11:49:01 | 24.049 | 8/17/2010 09:29:01 | 24.145 |
| 8/16/2010 12:09:01 | 24.049 | 8/17/2010 09:49:01 | 24.145 |
| 8/16/2010 12:29:01 | 24.049 | 8/17/2010 10:09:01 | 24.145 |
| 8/16/2010 12:49:01 | 23.986 | 8/17/2010 10:29:01 | 24.145 |
| 8/16/2010 13:09:01 | 23.986 | 8/17/2010 10:49:01 | 24.145 |
| 8/16/2010 13:29:01 | 23.986 | 8/17/2010 11:09:01 | 24.145 |
| 8/16/2010 13:49:01 | 23.986 | 8/17/2010 11:29:01 | 24.082 |
| 8/16/2010 14:09:01 | 23.986 | 8/17/2010 11:49:01 | 24.082 |
| 8/16/2010 14:29:01 | 23.986 | 8/17/2010 12:09:01 | 24.082 |

|                    |        |                    |        |
|--------------------|--------|--------------------|--------|
| 8/16/2010 14:49:01 | 23.986 | 8/17/2010 12:29:01 | 24.082 |
| 8/16/2010 15:09:01 | 24.049 | 8/17/2010 12:49:01 | 24.082 |
| 8/16/2010 15:29:01 | 24.049 | 8/17/2010 13:09:01 | 24.02  |
| 8/16/2010 15:49:01 | 24.049 | 8/17/2010 13:29:01 | 24.02  |
| 8/16/2010 16:09:01 | 24.111 | 8/17/2010 13:49:01 | 24.02  |
| 8/16/2010 16:29:01 | 24.111 | 8/17/2010 14:09:01 | 24.02  |
| 8/16/2010 16:49:01 | 24.174 | 8/17/2010 14:29:01 | 24.02  |
| 8/16/2010 17:09:01 | 24.236 | 8/17/2010 14:49:01 | 24.02  |
| 8/16/2010 17:29:01 | 24.236 | 8/17/2010 15:09:01 | 24.02  |
| 8/16/2010 17:49:01 | 24.299 | 8/17/2010 15:29:01 | 24.02  |
| 8/16/2010 18:09:01 | 24.299 | 8/17/2010 15:49:01 | 24.02  |
| 8/16/2010 18:29:01 | 24.361 | 8/17/2010 16:09:01 | 23.957 |
| 8/16/2010 18:49:01 | 24.424 | 8/17/2010 16:29:01 | 24.02  |
| 8/16/2010 19:09:01 | 24.424 | 8/17/2010 16:49:01 | 24.02  |
| 8/16/2010 19:29:01 | 24.486 | 8/17/2010 17:09:01 | 23.957 |
| 8/16/2010 19:49:01 | 24.486 | 8/17/2010 17:29:01 | 24.02  |
| 8/16/2010 20:09:01 | 24.549 | 8/17/2010 17:49:01 | 24.02  |
| 8/16/2010 20:29:01 | 24.549 | 8/17/2010 18:09:01 | 24.02  |
| 8/16/2010 20:49:01 | 24.611 | 8/17/2010 18:29:01 | 24.02  |
| 8/16/2010 21:09:01 | 24.611 | 8/17/2010 18:49:01 | 24.02  |
| 8/16/2010 21:29:01 | 24.611 | 8/17/2010 19:09:01 | 24.02  |
| 8/16/2010 21:49:01 | 24.611 | 8/17/2010 19:29:01 | 24.02  |
| 8/16/2010 22:09:01 | 24.674 | 8/17/2010 19:49:01 | 24.082 |
| 8/16/2010 22:29:01 | 24.674 | 8/17/2010 20:09:01 | 24.082 |
| 8/16/2010 22:49:01 | 24.674 | 8/17/2010 20:29:01 | 24.082 |
| 8/16/2010 23:09:01 | 24.674 | 8/17/2010 20:49:01 | 24.082 |
| 8/16/2010 23:29:01 | 24.674 | 8/17/2010 21:09:01 | 24.145 |
| 8/16/2010 23:49:01 | 24.674 | 8/17/2010 21:29:01 | 24.145 |
| 8/17/2010 00:09:01 | 24.736 | 8/17/2010 21:49:01 | 24.145 |
| 8/17/2010 00:29:01 | 24.736 | 8/17/2010 22:09:01 | 24.145 |
| 8/17/2010 00:49:01 | 24.736 | 8/17/2010 22:29:01 | 24.145 |
| 8/17/2010 01:09:01 | 24.736 | 8/17/2010 22:49:01 | 24.207 |
| 8/17/2010 01:29:01 | 24.736 | 8/17/2010 23:09:01 | 24.207 |
| 8/17/2010 01:49:01 | 24.674 | 8/17/2010 23:29:01 | 24.207 |
| 8/17/2010 02:09:01 | 24.674 | 8/17/2010 23:49:01 | 24.207 |
| 8/17/2010 02:29:01 | 24.674 | 8/18/2010 00:09:01 | 24.207 |
| 8/17/2010 02:49:01 | 24.674 | 8/18/2010 00:29:01 | 24.27  |
| 8/17/2010 03:09:01 | 24.674 | 8/18/2010 00:49:01 | 24.27  |
| 8/17/2010 03:29:01 | 24.674 | 8/18/2010 01:09:01 | 24.27  |
| 8/17/2010 03:49:01 | 24.674 | 8/18/2010 01:29:01 | 24.27  |
| 8/17/2010 04:09:01 | 24.611 | 8/18/2010 01:49:01 | 24.27  |
| 8/17/2010 04:29:01 | 24.611 | 8/18/2010 02:09:01 | 24.27  |
| 8/17/2010 04:49:01 | 24.611 | 8/18/2010 02:29:01 | 24.27  |
| 8/17/2010 05:09:01 | 24.611 | 8/18/2010 02:49:01 | 24.27  |
| 8/17/2010 05:29:01 | 24.611 | 8/18/2010 03:09:01 | 24.27  |
| 8/17/2010 05:49:01 | 24.549 | 8/18/2010 03:29:01 | 24.27  |
| 8/17/2010 06:09:01 | 24.549 | 8/18/2010 03:49:01 | 24.332 |
| 8/17/2010 06:29:01 | 24.549 | 8/18/2010 04:09:01 | 24.27  |
| 8/17/2010 06:49:01 | 24.486 | 8/18/2010 04:29:01 | 24.332 |
| 8/17/2010 07:09:01 | 24.486 | 8/18/2010 04:49:01 | 24.332 |

|                    |        |                    |        |
|--------------------|--------|--------------------|--------|
| 8/17/2010 07:29:01 | 24.486 | 8/18/2010 05:09:01 | 24.27  |
| 8/17/2010 07:49:01 | 24.424 | 8/18/2010 05:29:01 | 24.27  |
| 8/17/2010 08:09:01 | 24.424 | 8/18/2010 05:49:01 | 24.27  |
| 8/17/2010 08:29:01 | 24.424 | 8/18/2010 06:09:01 | 24.27  |
| 8/17/2010 08:49:01 | 24.361 | 8/18/2010 06:29:01 | 24.27  |
| 8/17/2010 09:09:01 | 24.361 | 8/18/2010 06:49:01 | 24.27  |
| 8/17/2010 09:29:01 | 24.299 | 8/18/2010 07:09:01 | 24.27  |
| 8/17/2010 09:49:01 | 24.299 | 8/18/2010 07:29:01 | 24.27  |
| 8/17/2010 10:09:01 | 24.299 | 8/18/2010 07:49:01 | 24.27  |
| 8/17/2010 10:29:01 | 24.236 | 8/18/2010 08:09:01 | 24.27  |
| 8/17/2010 10:49:01 | 24.236 | 8/18/2010 08:29:01 | 24.207 |
| 8/17/2010 11:09:01 | 24.236 | 8/18/2010 08:49:01 | 24.207 |
| 8/17/2010 11:29:01 | 24.174 | 8/18/2010 09:09:01 | 24.207 |
| 8/17/2010 11:49:01 | 24.174 | 8/18/2010 09:29:01 | 24.207 |
| 8/17/2010 12:09:01 | 24.174 | 8/18/2010 09:49:01 | 24.207 |
| 8/17/2010 12:29:01 | 24.111 | 8/18/2010 10:09:01 | 24.145 |
| 8/17/2010 12:49:01 | 24.111 | 8/18/2010 10:29:01 | 24.145 |
| 8/17/2010 13:09:01 | 24.111 | 8/18/2010 10:49:01 | 24.145 |
| 8/17/2010 13:29:01 | 24.111 | 8/18/2010 11:09:01 | 24.145 |
| 8/17/2010 13:49:01 | 24.111 | 8/18/2010 11:29:01 | 24.145 |
| 8/17/2010 14:09:01 | 24.111 | 8/18/2010 11:49:01 | 24.145 |
| 8/17/2010 14:29:01 | 24.111 | 8/18/2010 12:09:01 | 24.082 |
| 8/17/2010 14:49:01 | 24.111 | 8/18/2010 12:29:01 | 24.082 |
| 8/17/2010 15:09:01 | 24.174 | 8/18/2010 12:49:01 | 24.082 |
| 8/17/2010 15:29:01 | 24.174 | 8/18/2010 13:09:01 | 24.02  |
| 8/17/2010 15:49:01 | 24.174 | 8/18/2010 13:29:01 | 24.02  |
| 8/17/2010 16:09:01 | 24.236 | 8/18/2010 13:49:01 | 24.02  |
| 8/17/2010 16:29:01 | 24.236 | 8/18/2010 14:09:01 | 24.02  |
| 8/17/2010 16:49:01 | 24.299 | 8/18/2010 14:29:01 | 24.02  |
| 8/17/2010 17:09:01 | 24.361 | 8/18/2010 14:49:01 | 24.02  |
| 8/17/2010 17:29:01 | 24.361 | 8/18/2010 15:09:01 | 24.02  |
| 8/17/2010 17:49:01 | 24.424 | 8/18/2010 15:29:01 | 23.957 |
| 8/17/2010 18:09:01 | 24.424 | 8/18/2010 15:49:01 | 23.957 |
| 8/17/2010 18:29:01 | 24.486 | 8/18/2010 16:09:01 | 23.957 |
| 8/17/2010 18:49:01 | 24.549 | 8/18/2010 16:29:01 | 23.957 |
| 8/17/2010 19:09:01 | 24.549 | 8/18/2010 16:49:01 | 23.957 |
| 8/17/2010 19:29:01 | 24.611 | 8/18/2010 17:09:01 | 23.957 |
| 8/17/2010 19:49:01 | 24.611 | 8/18/2010 17:29:01 | 23.957 |
| 8/17/2010 20:09:01 | 24.674 | 8/18/2010 17:49:01 | 24.02  |
| 8/17/2010 20:29:01 | 24.674 | 8/18/2010 18:09:01 | 23.957 |
| 8/17/2010 20:49:01 | 24.674 | 8/18/2010 18:29:01 | 24.02  |
| 8/17/2010 21:09:01 | 24.736 | 8/18/2010 18:49:01 | 24.02  |
| 8/17/2010 21:29:01 | 24.736 | 8/18/2010 19:09:01 | 24.02  |
| 8/17/2010 21:49:01 | 24.736 | 8/18/2010 19:29:01 | 24.02  |
| 8/17/2010 22:09:01 | 24.736 | 8/18/2010 19:49:01 | 24.02  |
| 8/17/2010 22:29:01 | 24.799 | 8/18/2010 20:09:01 | 24.02  |
| 8/17/2010 22:49:01 | 24.799 | 8/18/2010 20:29:01 | 24.082 |
| 8/17/2010 23:09:01 | 24.799 | 8/18/2010 20:49:01 | 24.082 |
| 8/17/2010 23:29:01 | 24.799 | 8/18/2010 21:09:01 | 24.082 |
| 8/17/2010 23:49:01 | 24.799 | 8/18/2010 21:29:01 | 24.082 |

|                    |        |                    |        |
|--------------------|--------|--------------------|--------|
| 8/18/2010 00:09:01 | 24.799 | 8/18/2010 21:49:01 | 24.082 |
| 8/18/2010 00:29:01 | 24.799 | 8/18/2010 22:09:01 | 24.145 |
| 8/18/2010 00:49:01 | 24.799 | 8/18/2010 22:29:01 | 24.145 |
| 8/18/2010 01:09:01 | 24.799 | 8/18/2010 22:49:01 | 24.145 |
| 8/18/2010 01:29:01 | 24.799 | 8/18/2010 23:09:01 | 24.145 |
| 8/18/2010 01:49:01 | 24.736 | 8/18/2010 23:29:01 | 24.145 |
| 8/18/2010 02:09:01 | 24.736 | 8/18/2010 23:49:01 | 24.145 |
| 8/18/2010 02:29:01 | 24.736 | 8/19/2010 00:09:01 | 24.207 |
| 8/18/2010 02:49:01 | 24.736 | 8/19/2010 00:29:01 | 24.207 |
| 8/18/2010 03:09:01 | 24.736 | 8/19/2010 00:49:01 | 24.207 |
| 8/18/2010 03:29:01 | 24.674 | 8/19/2010 01:09:01 | 24.207 |
| 8/18/2010 03:49:01 | 24.674 | 8/19/2010 01:29:01 | 24.207 |
| 8/18/2010 04:09:01 | 24.674 | 8/19/2010 01:49:01 | 24.207 |
| 8/18/2010 04:29:01 | 24.674 | 8/19/2010 02:09:01 | 24.207 |
| 8/18/2010 04:49:01 | 24.611 | 8/19/2010 02:29:01 | 24.207 |
| 8/18/2010 05:09:01 | 24.611 | 8/19/2010 02:49:01 | 24.207 |
| 8/18/2010 05:29:01 | 24.611 | 8/19/2010 03:09:01 | 24.207 |
| 8/18/2010 05:49:01 | 24.549 | 8/19/2010 03:29:01 | 24.207 |
| 8/18/2010 06:09:01 | 24.549 | 8/19/2010 03:49:01 | 24.207 |
| 8/18/2010 06:29:01 | 24.486 | 8/19/2010 04:09:01 | 24.207 |
| 8/18/2010 06:49:01 | 24.486 | 8/19/2010 04:29:01 | 24.207 |
| 8/18/2010 07:09:01 | 24.486 | 8/19/2010 04:49:01 | 24.207 |
| 8/18/2010 07:29:01 | 24.424 | 8/19/2010 05:09:01 | 24.207 |
| 8/18/2010 07:49:01 | 24.424 | 8/19/2010 05:29:01 | 24.207 |
| 8/18/2010 08:09:01 | 24.361 | 8/19/2010 05:49:01 | 24.207 |
| 8/18/2010 08:29:01 | 24.361 | 8/19/2010 06:09:01 | 24.207 |
| 8/18/2010 08:49:01 | 24.299 | 8/19/2010 06:29:01 | 24.207 |
| 8/18/2010 09:09:01 | 24.299 | 8/19/2010 06:49:01 | 24.207 |
| 8/18/2010 09:29:01 | 24.299 | 8/19/2010 07:09:01 | 24.207 |
| 8/18/2010 09:49:01 | 24.236 | 8/19/2010 07:29:01 | 24.207 |
| 8/18/2010 10:09:01 | 24.236 | 8/19/2010 07:49:01 | 24.207 |
| 8/18/2010 10:29:01 | 24.174 | 8/19/2010 08:09:01 | 24.207 |
| 8/18/2010 10:49:01 | 24.174 | 8/19/2010 08:29:01 | 24.207 |
| 8/18/2010 11:09:01 | 24.111 | 8/19/2010 08:49:01 | 24.145 |
| 8/18/2010 11:29:01 | 24.111 | 8/19/2010 09:09:01 | 24.145 |
| 8/18/2010 11:49:01 | 24.111 | 8/19/2010 09:29:01 | 24.145 |
| 8/18/2010 12:09:01 | 24.049 | 8/19/2010 09:49:01 | 24.145 |
| 8/18/2010 12:29:01 | 24.049 | 8/19/2010 10:09:01 | 24.145 |
| 8/18/2010 12:49:01 | 24.049 | 8/19/2010 10:29:01 | 24.145 |
| 8/18/2010 13:09:01 | 24.049 | 8/19/2010 10:49:01 | 24.145 |
| 8/18/2010 13:29:01 | 24.049 | 8/19/2010 11:09:01 | 24.145 |
| 8/18/2010 13:49:01 | 24.049 | 8/19/2010 11:29:01 | 24.082 |
| 8/18/2010 14:09:01 | 24.049 | 8/19/2010 11:49:01 | 24.082 |
| 8/18/2010 14:29:01 | 24.049 | 8/19/2010 12:09:01 | 24.082 |
| 8/18/2010 14:49:01 | 24.049 | 8/19/2010 12:29:01 | 24.082 |
| 8/18/2010 15:09:01 | 24.049 | 8/19/2010 12:49:01 | 24.082 |
| 8/18/2010 15:29:01 | 24.111 | 8/19/2010 13:09:01 | 24.082 |
| 8/18/2010 15:49:01 | 24.111 | 8/19/2010 13:29:01 | 24.082 |
| 8/18/2010 16:09:01 | 24.174 | 8/19/2010 13:49:01 | 24.02  |
| 8/18/2010 16:29:01 | 24.174 | 8/19/2010 14:09:01 | 24.02  |

|                    |        |                    |        |
|--------------------|--------|--------------------|--------|
| 8/18/2010 16:49:01 | 24.236 | 8/19/2010 14:29:01 | 24.02  |
| 8/18/2010 17:09:01 | 24.236 | 8/19/2010 14:49:01 | 24.02  |
| 8/18/2010 17:29:01 | 24.299 | 8/19/2010 15:09:01 | 24.02  |
| 8/18/2010 17:49:01 | 24.299 | 8/19/2010 15:29:01 | 24.02  |
| 8/18/2010 18:09:01 | 24.361 | 8/19/2010 15:49:01 | 24.02  |
| 8/18/2010 18:29:01 | 24.424 | 8/19/2010 16:09:01 | 24.02  |
| 8/18/2010 18:49:01 | 24.424 | 8/19/2010 16:29:01 | 24.02  |
| 8/18/2010 19:09:01 | 24.486 | 8/19/2010 16:49:01 | 24.02  |
| 8/18/2010 19:29:01 | 24.486 | 8/19/2010 17:09:01 | 24.02  |
| 8/18/2010 19:49:01 | 24.549 | 8/19/2010 17:29:01 | 24.082 |
| 8/18/2010 20:09:01 | 24.549 | 8/19/2010 17:49:01 | 24.082 |
| 8/18/2010 20:29:01 | 24.611 | 8/19/2010 18:09:01 | 24.082 |
| 8/18/2010 20:49:01 | 24.611 | 8/19/2010 18:29:01 | 24.082 |
| 8/18/2010 21:09:01 | 24.611 | 8/19/2010 18:49:01 | 24.082 |
| 8/18/2010 21:29:01 | 24.611 | 8/19/2010 19:09:01 | 24.145 |
| 8/18/2010 21:49:01 | 24.674 | 8/19/2010 19:29:01 | 24.145 |
| 8/18/2010 22:09:01 | 24.674 | 8/19/2010 19:49:01 | 24.145 |
| 8/18/2010 22:29:01 | 24.674 | 8/19/2010 20:09:01 | 24.145 |
| 8/18/2010 22:49:01 | 24.674 | 8/19/2010 20:29:01 | 24.145 |
| 8/18/2010 23:09:01 | 24.674 | 8/19/2010 20:49:01 | 24.207 |
| 8/18/2010 23:29:01 | 24.674 | 8/19/2010 21:09:01 | 24.207 |
| 8/18/2010 23:49:01 | 24.674 | 8/19/2010 21:29:01 | 24.207 |
| 8/19/2010 00:09:01 | 24.674 | 8/19/2010 21:49:01 | 24.27  |
| 8/19/2010 00:29:01 | 24.674 | 8/19/2010 22:09:01 | 24.27  |
| 8/19/2010 00:49:01 | 24.674 | 8/19/2010 22:29:01 | 24.27  |
| 8/19/2010 01:09:01 | 24.674 | 8/19/2010 22:49:01 | 24.27  |
| 8/19/2010 01:29:01 | 24.674 | 8/19/2010 23:09:01 | 24.332 |
| 8/19/2010 01:49:01 | 24.674 | 8/19/2010 23:29:01 | 24.332 |
| 8/19/2010 02:09:01 | 24.611 | 8/19/2010 23:49:01 | 24.332 |
| 8/19/2010 02:29:01 | 24.611 | 8/20/2010 00:09:01 | 24.332 |
| 8/19/2010 02:49:01 | 24.611 | 8/20/2010 00:29:01 | 24.395 |
| 8/19/2010 03:09:01 | 24.611 | 8/20/2010 00:49:01 | 24.395 |
| 8/19/2010 03:29:01 | 24.611 | 8/20/2010 01:09:01 | 24.395 |
| 8/19/2010 03:49:01 | 24.549 | 8/20/2010 01:29:01 | 24.395 |
| 8/19/2010 04:09:01 | 24.549 | 8/20/2010 01:49:01 | 24.395 |
| 8/19/2010 04:29:01 | 24.549 | 8/20/2010 02:09:01 | 24.395 |
| 8/19/2010 04:49:01 | 24.549 | 8/20/2010 02:29:01 | 24.457 |
| 8/19/2010 05:09:01 | 24.486 | 8/20/2010 02:49:01 | 24.457 |
| 8/19/2010 05:29:01 | 24.486 | 8/20/2010 03:09:01 | 24.457 |
| 8/19/2010 05:49:01 | 24.486 | 8/20/2010 03:29:01 | 24.457 |
| 8/19/2010 06:09:01 | 24.486 | 8/20/2010 03:49:01 | 24.457 |
| 8/19/2010 06:29:01 | 24.486 | 8/20/2010 04:09:01 | 24.457 |
| 8/19/2010 06:49:01 | 24.424 | 8/20/2010 04:29:01 | 24.457 |
| 8/19/2010 07:09:01 | 24.424 | 8/20/2010 04:49:01 | 24.457 |
| 8/19/2010 07:29:01 | 24.424 | 8/20/2010 05:09:01 | 24.457 |
| 8/19/2010 07:49:01 | 24.361 | 8/20/2010 05:29:01 | 24.457 |
| 8/19/2010 08:09:01 | 24.361 | 8/20/2010 05:49:01 | 24.457 |
| 8/19/2010 08:29:01 | 24.361 | 8/20/2010 06:09:01 | 24.457 |
| 8/19/2010 08:49:01 | 24.361 | 8/20/2010 06:29:01 | 24.457 |
| 8/19/2010 09:09:01 | 24.299 | 8/20/2010 06:49:01 | 24.457 |



|                    |        |                    |        |
|--------------------|--------|--------------------|--------|
| 8/19/2010 09:29:01 | 24.299 | 8/20/2010 07:09:01 | 24.457 |
| 8/19/2010 09:49:01 | 24.299 | 8/20/2010 07:29:01 | 24.457 |
| 8/19/2010 10:09:01 | 24.299 | 8/20/2010 07:49:01 | 24.457 |
| 8/19/2010 10:29:01 | 24.236 | 8/20/2010 08:09:01 | 24.457 |
| 8/19/2010 10:49:01 | 24.236 | 8/20/2010 08:29:01 | 24.457 |
| 8/19/2010 11:09:01 | 24.236 | 8/20/2010 08:49:01 | 24.457 |
| 8/19/2010 11:29:01 | 24.236 | 8/20/2010 09:09:01 | 24.395 |
| 8/19/2010 11:49:01 | 24.236 | 8/20/2010 09:29:01 | 24.395 |
| 8/19/2010 12:09:01 | 24.236 | 8/20/2010 09:49:01 | 24.395 |
| 8/19/2010 12:29:01 | 24.174 | 8/20/2010 10:09:01 | 24.395 |
| 8/19/2010 12:49:01 | 24.174 | 8/20/2010 10:29:01 | 24.395 |
| 8/19/2010 13:09:01 | 24.174 | 8/20/2010 10:49:01 | 24.332 |
| 8/19/2010 13:29:01 | 24.174 | 8/20/2010 11:09:01 | 24.332 |
| 8/19/2010 13:49:01 | 24.174 | 8/20/2010 11:29:01 | 24.332 |
| 8/19/2010 14:09:01 | 24.174 | 8/20/2010 11:49:01 | 24.332 |
| 8/19/2010 14:29:01 | 24.236 | 8/20/2010 12:09:01 | 24.332 |
| 8/19/2010 14:49:01 | 24.236 | 8/20/2010 12:29:01 | 24.27  |
| 8/19/2010 15:09:01 | 24.236 | 8/20/2010 12:49:01 | 24.27  |
| 8/19/2010 15:29:01 | 24.299 | 8/20/2010 13:09:01 | 24.27  |
| 8/19/2010 15:49:01 | 24.299 | 8/20/2010 13:29:01 | 24.27  |
| 8/19/2010 16:09:01 | 24.361 | 8/20/2010 13:49:01 | 24.27  |
| 8/19/2010 16:29:01 | 24.424 | 8/20/2010 14:09:01 | 24.27  |
| 8/19/2010 16:49:01 | 24.424 | 8/20/2010 14:29:01 | 24.207 |
| 8/19/2010 17:09:01 | 24.486 | 8/20/2010 14:49:01 | 24.207 |
| 8/19/2010 17:29:01 | 24.549 | 8/20/2010 15:09:01 | 24.207 |
| 8/19/2010 17:49:01 | 24.549 | 8/20/2010 15:29:01 | 24.207 |
| 8/19/2010 18:09:01 | 24.611 | 8/20/2010 15:49:01 | 24.207 |
| 8/19/2010 18:29:01 | 24.674 | 8/20/2010 16:09:01 | 24.207 |
| 8/19/2010 18:49:01 | 24.674 | 8/20/2010 16:29:01 | 24.207 |
| 8/19/2010 19:09:01 | 24.736 | 8/20/2010 16:49:01 | 24.207 |
| 8/19/2010 19:29:01 | 24.799 | 8/20/2010 17:09:01 | 24.207 |
| 8/19/2010 19:49:01 | 24.799 | 8/20/2010 17:29:01 | 24.207 |
| 8/19/2010 20:09:01 | 24.861 | 8/20/2010 17:49:01 | 24.207 |
| 8/19/2010 20:29:01 | 24.861 | 8/20/2010 18:09:01 | 24.207 |
| 8/19/2010 20:49:01 | 24.861 | 8/20/2010 18:29:01 | 24.207 |
| 8/19/2010 21:09:01 | 24.924 | 8/20/2010 18:49:01 | 24.207 |
| 8/19/2010 21:29:01 | 24.924 | 8/20/2010 19:09:01 | 24.207 |
| 8/19/2010 21:49:01 | 24.986 | 8/20/2010 19:29:01 | 24.207 |
| 8/19/2010 22:09:01 | 24.986 | 8/20/2010 19:49:01 | 24.207 |
| 8/19/2010 22:29:01 | 24.986 | 8/20/2010 20:09:01 | 24.27  |
| 8/19/2010 22:49:01 | 24.986 | 8/20/2010 20:29:01 | 24.27  |
| 8/19/2010 23:09:01 | 24.986 | 8/20/2010 20:49:01 | 24.27  |
| 8/19/2010 23:29:01 | 25.049 | 8/20/2010 21:09:01 | 24.27  |
| 8/19/2010 23:49:01 | 25.049 | 8/20/2010 21:29:01 | 24.27  |
| 8/20/2010 00:09:01 | 25.049 | 8/20/2010 21:49:01 | 24.332 |
| 8/20/2010 00:29:01 | 25.049 | 8/20/2010 22:09:01 | 24.332 |
| 8/20/2010 00:49:01 | 25.049 | 8/20/2010 22:29:01 | 24.332 |
| 8/20/2010 01:09:01 | 25.049 | 8/20/2010 22:49:01 | 24.332 |
| 8/20/2010 01:29:01 | 25.049 | 8/20/2010 23:09:01 | 24.332 |
| 8/20/2010 01:49:01 | 25.049 | 8/20/2010 23:29:01 | 24.395 |

|                    |        |                    |        |
|--------------------|--------|--------------------|--------|
| 8/20/2010 02:09:01 | 25.049 | 8/20/2010 23:49:01 | 24.395 |
| 8/20/2010 02:29:01 | 25.049 | 8/21/2010 00:09:01 | 24.395 |
| 8/20/2010 02:49:01 | 25.049 | 8/21/2010 00:29:01 | 24.395 |
| 8/20/2010 03:09:01 | 25.049 | 8/21/2010 00:49:01 | 24.395 |
| 8/20/2010 03:29:01 | 25.049 | 8/21/2010 01:09:01 | 24.395 |
| 8/20/2010 03:49:01 | 25.049 | 8/21/2010 01:29:01 | 24.395 |
| 8/20/2010 04:09:01 | 25.049 | 8/21/2010 01:49:01 | 24.457 |
| 8/20/2010 04:29:01 | 24.986 | 8/21/2010 02:09:01 | 24.457 |
| 8/20/2010 04:49:01 | 24.986 | 8/21/2010 02:29:01 | 24.457 |
| 8/20/2010 05:09:01 | 24.986 | 8/21/2010 02:49:01 | 24.457 |
| 8/20/2010 05:29:01 | 24.986 | 8/21/2010 03:09:01 | 24.457 |
| 8/20/2010 05:49:01 | 24.986 | 8/21/2010 03:29:01 | 24.457 |
| 8/20/2010 06:09:01 | 24.924 | 8/21/2010 03:49:01 | 24.457 |
| 8/20/2010 06:29:01 | 24.924 | 8/21/2010 04:09:01 | 24.457 |
| 8/20/2010 06:49:01 | 24.924 | 8/21/2010 04:29:01 | 24.457 |
| 8/20/2010 07:09:01 | 24.861 | 8/21/2010 04:49:01 | 24.457 |
| 8/20/2010 07:29:01 | 24.861 | 8/21/2010 05:09:01 | 24.457 |
| 8/20/2010 07:49:01 | 24.861 | 8/21/2010 05:29:01 | 24.457 |
| 8/20/2010 08:09:01 | 24.799 | 8/21/2010 05:49:01 | 24.457 |
| 8/20/2010 08:29:01 | 24.799 | 8/21/2010 06:09:01 | 24.457 |
| 8/20/2010 08:49:01 | 24.736 | 8/21/2010 06:29:01 | 24.457 |
| 8/20/2010 09:09:01 | 24.736 | 8/21/2010 06:49:01 | 24.457 |
| 8/20/2010 09:29:01 | 24.736 | 8/21/2010 07:09:01 | 24.457 |
| 8/20/2010 09:49:01 | 24.674 | 8/21/2010 07:29:01 | 24.457 |
| 8/20/2010 10:09:01 | 24.674 | 8/21/2010 07:49:01 | 24.457 |
| 8/20/2010 10:29:01 | 24.674 | 8/21/2010 08:09:01 | 24.457 |
| 8/20/2010 10:49:01 | 24.611 | 8/21/2010 08:29:01 | 24.457 |
| 8/20/2010 11:09:01 | 24.611 | 8/21/2010 08:49:01 | 24.457 |
| 8/20/2010 11:29:01 | 24.611 | 8/21/2010 09:09:01 | 24.457 |
| 8/20/2010 11:49:01 | 24.549 | 8/21/2010 09:29:01 | 24.457 |
| 8/20/2010 12:09:01 | 24.549 | 8/21/2010 09:49:01 | 24.457 |
| 8/20/2010 12:29:01 | 24.549 | 8/21/2010 10:09:01 | 24.457 |
| 8/20/2010 12:49:01 | 24.549 | 8/21/2010 10:29:01 | 24.395 |
| 8/20/2010 13:09:01 | 24.486 | 8/21/2010 10:49:01 | 24.395 |
| 8/20/2010 13:29:01 | 24.486 | 8/21/2010 11:09:01 | 24.395 |
| 8/20/2010 13:49:01 | 24.486 | 8/21/2010 11:29:01 | 24.395 |
| 8/20/2010 14:09:01 | 24.486 | 8/21/2010 11:49:01 | 24.395 |
| 8/20/2010 14:29:01 | 24.486 | 8/21/2010 12:09:01 | 24.395 |
| 8/20/2010 14:49:01 | 24.486 | 8/21/2010 12:29:01 | 24.332 |
| 8/20/2010 15:09:01 | 24.549 | 8/21/2010 12:49:01 | 24.332 |
| 8/20/2010 15:29:01 | 24.549 | 8/21/2010 13:09:01 | 24.332 |
| 8/20/2010 15:49:01 | 24.611 | 8/21/2010 13:29:01 | 24.332 |
| 8/20/2010 16:09:01 | 24.611 | 8/21/2010 13:49:01 | 24.332 |
| 8/20/2010 16:29:01 | 24.674 | 8/21/2010 14:09:01 | 24.332 |
| 8/20/2010 16:49:01 | 24.674 | 8/21/2010 14:29:01 | 24.332 |
| 8/20/2010 17:09:01 | 24.736 | 8/21/2010 14:49:01 | 24.332 |
| 8/20/2010 17:29:01 | 24.799 | 8/21/2010 15:09:01 | 24.332 |
| 8/20/2010 17:49:01 | 24.799 | 8/21/2010 15:29:01 | 24.332 |
| 8/20/2010 18:09:01 | 24.861 | 8/21/2010 15:49:01 | 24.332 |
| 8/20/2010 18:29:01 | 24.861 | 8/21/2010 16:09:01 | 24.27  |

|                    |        |                    |        |
|--------------------|--------|--------------------|--------|
| 8/20/2010 18:49:01 | 24.924 | 8/21/2010 16:29:01 | 24.332 |
| 8/20/2010 19:09:01 | 24.924 | 8/21/2010 16:49:01 | 24.332 |
| 8/20/2010 19:29:01 | 24.986 | 8/21/2010 17:09:01 | 24.332 |
| 8/20/2010 19:49:01 | 24.986 | 8/21/2010 17:29:01 | 24.332 |
| 8/20/2010 20:09:01 | 25.049 | 8/21/2010 17:49:01 | 24.332 |
| 8/20/2010 20:29:01 | 25.049 | 8/21/2010 18:09:01 | 24.332 |
| 8/20/2010 20:49:01 | 25.049 | 8/21/2010 18:29:01 | 24.332 |
| 8/20/2010 21:09:01 | 25.111 | 8/21/2010 18:49:01 | 24.332 |
| 8/20/2010 21:29:01 | 25.111 | 8/21/2010 19:09:01 | 24.395 |
| 8/20/2010 21:49:01 | 25.111 | 8/21/2010 19:29:01 | 24.395 |
| 8/20/2010 22:09:01 | 25.111 | 8/21/2010 19:49:01 | 24.395 |
| 8/20/2010 22:29:01 | 25.174 | 8/21/2010 20:09:01 | 24.395 |
| 8/20/2010 22:49:01 | 25.174 | 8/21/2010 20:29:01 | 24.395 |
| 8/20/2010 23:09:01 | 25.174 | 8/21/2010 20:49:01 | 24.457 |
| 8/20/2010 23:29:01 | 25.174 | 8/21/2010 21:09:01 | 24.457 |
| 8/20/2010 23:49:01 | 25.174 | 8/21/2010 21:29:01 | 24.457 |
| 8/21/2010 00:09:01 | 25.174 | 8/21/2010 21:49:01 | 24.457 |
| 8/21/2010 00:29:01 | 25.174 | 8/21/2010 22:09:01 | 24.52  |
| 8/21/2010 00:49:01 | 25.174 | 8/21/2010 22:29:01 | 24.52  |
| 8/21/2010 01:09:01 | 25.174 | 8/21/2010 22:49:01 | 24.52  |
| 8/21/2010 01:29:01 | 25.174 | 8/21/2010 23:09:01 | 24.52  |
| 8/21/2010 01:49:01 | 25.111 | 8/21/2010 23:29:01 | 24.582 |
| 8/21/2010 02:09:01 | 25.111 | 8/21/2010 23:49:01 | 24.582 |
| 8/21/2010 02:29:01 | 25.111 | 8/22/2010 00:09:01 | 24.582 |
| 8/21/2010 02:49:01 | 25.111 | 8/22/2010 00:29:01 | 24.645 |
| 8/21/2010 03:09:01 | 25.111 | 8/22/2010 00:49:01 | 24.645 |
| 8/21/2010 03:29:01 | 25.111 | 8/22/2010 01:09:01 | 24.645 |
| 8/21/2010 03:49:01 | 25.111 | 8/22/2010 01:29:01 | 24.645 |
| 8/21/2010 04:09:01 | 25.049 | 8/22/2010 01:49:01 | 24.708 |
| 8/21/2010 04:29:01 | 25.049 | 8/22/2010 02:09:01 | 24.708 |
| 8/21/2010 04:49:01 | 25.049 | 8/22/2010 02:29:01 | 24.708 |
| 8/21/2010 05:09:01 | 25.049 | 8/22/2010 02:49:01 | 24.708 |
| 8/21/2010 05:29:01 | 24.986 | 8/22/2010 03:09:01 | 24.708 |
| 8/21/2010 05:49:01 | 24.986 | 8/22/2010 03:29:01 | 24.708 |
| 8/21/2010 06:09:01 | 24.986 | 8/22/2010 03:49:01 | 24.708 |
| 8/21/2010 06:29:01 | 24.986 | 8/22/2010 04:09:01 | 24.708 |
| 8/21/2010 06:49:01 | 24.924 | 8/22/2010 04:29:01 | 24.708 |
| 8/21/2010 07:09:01 | 24.924 | 8/22/2010 04:49:01 | 24.708 |
| 8/21/2010 07:29:01 | 24.924 | 8/22/2010 05:09:01 | 24.708 |
| 8/21/2010 07:49:01 | 24.861 | 8/22/2010 05:29:01 | 24.708 |
| 8/21/2010 08:09:01 | 24.861 | 8/22/2010 05:49:01 | 24.708 |
| 8/21/2010 08:29:01 | 24.861 | 8/22/2010 06:09:01 | 24.708 |
| 8/21/2010 08:49:01 | 24.799 | 8/22/2010 06:29:01 | 24.708 |
| 8/21/2010 09:09:01 | 24.799 | 8/22/2010 06:49:01 | 24.708 |
| 8/21/2010 09:29:01 | 24.799 | 8/22/2010 07:09:01 | 24.708 |
| 8/21/2010 09:49:01 | 24.736 | 8/22/2010 07:29:01 | 24.645 |
| 8/21/2010 10:09:01 | 24.736 | 8/22/2010 07:49:01 | 24.645 |
| 8/21/2010 10:29:01 | 24.736 | 8/22/2010 08:09:01 | 24.645 |
| 8/21/2010 10:49:01 | 24.736 | 8/22/2010 08:29:01 | 24.645 |
| 8/21/2010 11:09:01 | 24.674 | 8/22/2010 08:49:01 | 24.645 |

|                    |        |                    |        |
|--------------------|--------|--------------------|--------|
| 8/21/2010 11:29:01 | 24.674 | 8/22/2010 09:09:01 | 24.645 |
| 8/21/2010 11:49:01 | 24.674 | 8/22/2010 09:29:01 | 24.582 |
| 8/21/2010 12:09:01 | 24.674 | 8/22/2010 09:49:01 | 24.582 |
| 8/21/2010 12:29:01 | 24.611 | 8/22/2010 10:09:01 | 24.582 |
| 8/21/2010 12:49:01 | 24.611 | 8/22/2010 10:29:01 | 24.582 |
| 8/21/2010 13:09:01 | 24.611 | 8/22/2010 10:49:01 | 24.52  |
| 8/21/2010 13:29:01 | 24.611 | 8/22/2010 11:09:01 | 24.52  |
| 8/21/2010 13:49:01 | 24.611 | 8/22/2010 11:29:01 | 24.52  |
| 8/21/2010 14:09:01 | 24.611 | 8/22/2010 11:49:01 | 24.52  |
| 8/21/2010 14:29:01 | 24.674 | 8/22/2010 12:09:01 | 24.457 |
| 8/21/2010 14:49:01 | 24.674 | 8/22/2010 12:29:01 | 24.457 |
| 8/21/2010 15:09:01 | 24.674 | 8/22/2010 12:49:01 | 24.457 |
| 8/21/2010 15:29:01 | 24.736 | 8/22/2010 13:09:01 | 24.457 |
| 8/21/2010 15:49:01 | 24.736 | 8/22/2010 13:29:01 | 24.457 |
| 8/21/2010 16:09:01 | 24.799 | 8/22/2010 13:49:01 | 24.395 |
| 8/21/2010 16:29:01 | 24.799 | 8/22/2010 14:09:01 | 24.395 |
| 8/21/2010 16:49:01 | 24.861 | 8/22/2010 14:29:01 | 24.395 |
| 8/21/2010 17:09:01 | 24.924 | 8/22/2010 14:49:01 | 24.395 |
| 8/21/2010 17:29:01 | 24.924 | 8/22/2010 15:09:01 | 24.395 |
| 8/21/2010 17:49:01 | 24.986 | 8/22/2010 15:29:01 | 24.395 |
| 8/21/2010 18:09:01 | 24.986 | 8/22/2010 15:49:01 | 24.395 |
| 8/21/2010 18:29:01 | 25.049 | 8/22/2010 16:09:01 | 24.395 |
| 8/21/2010 18:49:01 | 25.111 | 8/22/2010 16:29:01 | 24.395 |
| 8/21/2010 19:09:01 | 25.111 | 8/22/2010 16:49:01 | 24.332 |
| 8/21/2010 19:29:01 | 25.174 | 8/22/2010 17:09:01 | 24.332 |
| 8/21/2010 19:49:01 | 25.174 | 8/22/2010 17:29:01 | 24.395 |
| 8/21/2010 20:09:01 | 25.236 | 8/22/2010 17:49:01 | 24.395 |
| 8/21/2010 20:29:01 | 25.236 | 8/22/2010 18:09:01 | 24.332 |
| 8/21/2010 20:49:01 | 25.299 | 8/22/2010 18:29:01 | 24.395 |
| 8/21/2010 21:09:01 | 25.299 | 8/22/2010 18:49:01 | 24.395 |
| 8/21/2010 21:29:01 | 25.299 | 8/22/2010 19:09:01 | 24.395 |
| 8/21/2010 21:49:01 | 25.361 | 8/22/2010 19:29:01 | 24.395 |
| 8/21/2010 22:09:01 | 25.361 | 8/22/2010 19:49:01 | 24.395 |
| 8/21/2010 22:29:01 | 25.361 | 8/22/2010 20:09:01 | 24.395 |
| 8/21/2010 22:49:01 | 25.361 | 8/22/2010 20:29:01 | 24.395 |
| 8/21/2010 23:09:01 | 25.361 | 8/22/2010 20:49:01 | 24.395 |
| 8/21/2010 23:29:01 | 25.361 | 8/22/2010 21:09:01 | 24.457 |
| 8/21/2010 23:49:01 | 25.424 | 8/22/2010 21:29:01 | 24.457 |
| 8/22/2010 00:09:01 | 25.361 | 8/22/2010 21:49:01 | 24.457 |
| 8/22/2010 00:29:01 | 25.424 | 8/22/2010 22:09:01 | 24.457 |
| 8/22/2010 00:49:01 | 25.424 | 8/22/2010 22:29:01 | 24.457 |
| 8/22/2010 01:09:01 | 25.424 | 8/22/2010 22:49:01 | 24.457 |
| 8/22/2010 01:29:01 | 25.424 | 8/22/2010 23:09:01 | 24.457 |
| 8/22/2010 01:49:01 | 25.424 | 8/22/2010 23:29:01 | 24.457 |
| 8/22/2010 02:09:01 | 25.361 | 8/22/2010 23:49:01 | 24.457 |
| 8/22/2010 02:29:01 | 25.361 | 8/23/2010 00:09:01 | 24.457 |
| 8/22/2010 02:49:01 | 25.361 | 8/23/2010 00:29:01 | 24.457 |
| 8/22/2010 03:09:01 | 25.361 | 8/23/2010 00:49:01 | 24.457 |
| 8/22/2010 03:29:01 | 25.361 | 8/23/2010 01:09:01 | 24.457 |
| 8/22/2010 03:49:01 | 25.299 | 8/23/2010 01:29:01 | 24.52  |

|                    |        |                    |        |
|--------------------|--------|--------------------|--------|
| 8/22/2010 04:09:01 | 25.299 | 8/23/2010 01:49:01 | 24.457 |
| 8/22/2010 04:29:01 | 25.299 | 8/23/2010 02:09:01 | 24.52  |
| 8/22/2010 04:49:01 | 25.299 | 8/23/2010 02:29:01 | 24.52  |
| 8/22/2010 05:09:01 | 25.236 | 8/23/2010 02:49:01 | 24.52  |
| 8/22/2010 05:29:01 | 25.236 | 8/23/2010 03:09:01 | 24.52  |
| 8/22/2010 05:49:01 | 25.236 | 8/23/2010 03:29:01 | 24.52  |
| 8/22/2010 06:09:01 | 25.174 | 8/23/2010 03:49:01 | 24.52  |
| 8/22/2010 06:29:01 | 25.174 | 8/23/2010 04:09:01 | 24.457 |
| 8/22/2010 06:49:01 | 25.111 | 8/23/2010 04:29:01 | 24.457 |
| 8/22/2010 07:09:01 | 25.111 | 8/23/2010 04:49:01 | 24.457 |
| 8/22/2010 07:29:01 | 25.111 | 8/23/2010 05:09:01 | 24.457 |
| 8/22/2010 07:49:01 | 25.049 | 8/23/2010 05:29:01 | 24.457 |
| 8/22/2010 08:09:01 | 25.049 | 8/23/2010 05:49:01 | 24.457 |
| 8/22/2010 08:29:01 | 24.986 | 8/23/2010 06:09:01 | 24.457 |
| 8/22/2010 08:49:01 | 24.986 | 8/23/2010 06:29:01 | 24.457 |
| 8/22/2010 09:09:01 | 24.924 | 8/23/2010 06:49:01 | 24.457 |
| 8/22/2010 09:29:01 | 24.924 | 8/23/2010 07:09:01 | 24.457 |
| 8/22/2010 09:49:01 | 24.861 | 8/23/2010 07:29:01 | 24.457 |
| 8/22/2010 10:09:01 | 24.861 | 8/23/2010 07:49:01 | 24.457 |
| 8/22/2010 10:29:01 | 24.799 | 8/23/2010 08:09:01 | 24.395 |
| 8/22/2010 10:49:01 | 24.799 | 8/23/2010 08:29:01 | 24.395 |
| 8/22/2010 11:09:01 | 24.799 | 8/23/2010 08:49:01 | 24.395 |
| 8/22/2010 11:29:01 | 24.736 | 8/23/2010 09:09:01 | 24.395 |
| 8/22/2010 11:49:01 | 24.736 | 8/23/2010 09:29:01 | 24.395 |
| 8/22/2010 12:09:01 | 24.736 | 8/23/2010 09:49:01 | 24.332 |
| 8/22/2010 12:29:01 | 24.674 | 8/23/2010 10:09:01 | 24.332 |
| 8/22/2010 12:49:01 | 24.674 | 8/23/2010 10:29:01 | 24.332 |
| 8/22/2010 13:09:01 | 24.674 | 8/23/2010 10:49:01 | 24.332 |
| 8/22/2010 13:29:01 | 24.674 | 8/23/2010 11:09:01 | 24.332 |
| 8/22/2010 13:49:01 | 24.674 | 8/23/2010 11:29:01 | 24.332 |
| 8/22/2010 14:09:01 | 24.674 | 8/23/2010 11:49:01 | 24.27  |
| 8/22/2010 14:29:01 | 24.674 | 8/23/2010 12:09:01 | 24.27  |
| 8/22/2010 14:49:01 | 24.674 | 8/23/2010 12:29:01 | 24.27  |
| 8/22/2010 15:09:01 | 24.674 | 8/23/2010 12:49:01 | 24.27  |
| 8/22/2010 15:29:01 | 24.674 | 8/23/2010 13:09:01 | 24.27  |
| 8/22/2010 15:49:01 | 24.736 | 8/23/2010 13:29:01 | 24.207 |
| 8/22/2010 16:09:01 | 24.736 | 8/23/2010 13:49:01 | 24.207 |
| 8/22/2010 16:29:01 | 24.736 | 8/23/2010 14:09:01 | 24.207 |
| 8/22/2010 16:49:01 | 24.799 | 8/23/2010 14:29:01 | 24.207 |
| 8/22/2010 17:09:01 | 24.799 | 8/23/2010 14:49:01 | 24.207 |
| 8/22/2010 17:29:01 | 24.799 | 8/23/2010 15:09:01 | 24.207 |
| 8/22/2010 17:49:01 | 24.861 | 8/23/2010 15:29:01 | 24.207 |
| 8/22/2010 18:09:01 | 24.861 | 8/23/2010 15:49:01 | 24.207 |
| 8/22/2010 18:29:01 | 24.861 | 8/23/2010 16:09:01 | 24.207 |
| 8/22/2010 18:49:01 | 24.924 | 8/23/2010 16:29:01 | 24.207 |
| 8/22/2010 19:09:01 | 24.924 | 8/23/2010 16:49:01 | 24.207 |
| 8/22/2010 19:29:01 | 24.924 | 8/23/2010 17:09:01 | 24.207 |
| 8/22/2010 19:49:01 | 24.986 | 8/23/2010 17:29:01 | 24.207 |
| 8/22/2010 20:09:01 | 24.986 | 8/23/2010 17:49:01 | 24.27  |
| 8/22/2010 20:29:01 | 24.986 | 8/23/2010 18:09:01 | 24.27  |

|                    |        |                    |        |
|--------------------|--------|--------------------|--------|
| 8/22/2010 20:49:01 | 24.986 | 8/23/2010 18:29:01 | 24.27  |
| 8/22/2010 21:09:01 | 24.986 | 8/23/2010 18:49:01 | 24.27  |
| 8/22/2010 21:29:01 | 24.986 | 8/23/2010 19:09:01 | 24.27  |
| 8/22/2010 21:49:01 | 24.986 | 8/23/2010 19:29:01 | 24.27  |
| 8/22/2010 22:09:01 | 24.986 | 8/23/2010 19:49:01 | 24.332 |
| 8/22/2010 22:29:01 | 25.049 | 8/23/2010 20:09:01 | 24.332 |
| 8/22/2010 22:49:01 | 24.986 | 8/23/2010 20:29:01 | 24.332 |
| 8/22/2010 23:09:01 | 24.986 | 8/23/2010 20:49:01 | 24.332 |
| 8/22/2010 23:29:01 | 24.986 | 8/23/2010 21:09:01 | 24.332 |
| 8/22/2010 23:49:01 | 24.986 | 8/23/2010 21:29:01 | 24.332 |
| 8/23/2010 00:09:01 | 24.986 | 8/23/2010 21:49:01 | 24.395 |
| 8/23/2010 00:29:01 | 24.986 | 8/23/2010 22:09:01 | 24.395 |
| 8/23/2010 00:49:01 | 24.986 | 8/23/2010 22:29:01 | 24.395 |
| 8/23/2010 01:09:01 | 24.986 | 8/23/2010 22:49:01 | 24.395 |
| 8/23/2010 01:29:01 | 24.924 | 8/23/2010 23:09:01 | 24.395 |
| 8/23/2010 01:49:01 | 24.924 | 8/23/2010 23:29:01 | 24.457 |
| 8/23/2010 02:09:01 | 24.924 | 8/23/2010 23:49:01 | 24.457 |
| 8/23/2010 02:29:01 | 24.924 | 8/24/2010 00:09:01 | 24.457 |
| 8/23/2010 02:49:01 | 24.924 | 8/24/2010 00:29:01 | 24.457 |
| 8/23/2010 03:09:01 | 24.861 | 8/24/2010 00:49:01 | 24.457 |
| 8/23/2010 03:29:01 | 24.861 | 8/24/2010 01:09:01 | 24.457 |
| 8/23/2010 03:49:01 | 24.861 | 8/24/2010 01:29:01 | 24.457 |
| 8/23/2010 04:09:01 | 24.861 | 8/24/2010 01:49:01 | 24.457 |
| 8/23/2010 04:29:01 | 24.799 | 8/24/2010 02:09:01 | 24.457 |
| 8/23/2010 04:49:01 | 24.799 | 8/24/2010 02:29:01 | 24.457 |
| 8/23/2010 05:09:01 | 24.799 | 8/24/2010 02:49:01 | 24.457 |
| 8/23/2010 05:29:01 | 24.736 | 8/24/2010 03:09:01 | 24.52  |
| 8/23/2010 05:49:01 | 24.736 | 8/24/2010 03:29:01 | 24.457 |
| 8/23/2010 06:09:01 | 24.736 | 8/24/2010 03:49:01 | 24.457 |
| 8/23/2010 06:29:01 | 24.674 | 8/24/2010 04:09:01 | 24.457 |
| 8/23/2010 06:49:01 | 24.674 | 8/24/2010 04:29:01 | 24.52  |
| 8/23/2010 07:09:01 | 24.674 | 8/24/2010 04:49:01 | 24.457 |
| 8/23/2010 07:29:01 | 24.611 | 8/24/2010 05:09:01 | 24.457 |
| 8/23/2010 07:49:01 | 24.611 | 8/24/2010 05:29:01 | 24.457 |
| 8/23/2010 08:09:01 | 24.611 | 8/24/2010 05:49:01 | 24.457 |
| 8/23/2010 08:29:01 | 24.549 | 8/24/2010 06:09:01 | 24.457 |
| 8/23/2010 08:49:01 | 24.549 | 8/24/2010 06:29:01 | 24.457 |
| 8/23/2010 09:09:01 | 24.486 | 8/24/2010 06:49:01 | 24.457 |
| 8/23/2010 09:29:01 | 24.486 | 8/24/2010 07:09:01 | 24.457 |
| 8/23/2010 09:49:01 | 24.486 | 8/24/2010 07:29:01 | 24.457 |
| 8/23/2010 10:09:01 | 24.424 | 8/24/2010 07:49:01 | 24.457 |
| 8/23/2010 10:29:01 | 24.424 | 8/24/2010 08:09:01 | 24.457 |
| 8/23/2010 10:49:01 | 24.424 | 8/24/2010 08:29:01 | 24.457 |
| 8/23/2010 11:09:01 | 24.361 | 8/24/2010 08:49:01 | 24.457 |
| 8/23/2010 11:29:01 | 24.361 | 8/24/2010 09:09:01 | 24.457 |
| 8/23/2010 11:49:01 | 24.361 | 8/24/2010 09:29:01 | 24.457 |
| 8/23/2010 12:09:01 | 24.299 | 8/24/2010 09:49:01 | 24.395 |
| 8/23/2010 12:29:01 | 24.299 | 8/24/2010 10:09:01 | 24.395 |
| 8/23/2010 12:49:01 | 24.299 | 8/24/2010 10:29:01 | 24.395 |
| 8/23/2010 13:09:01 | 24.299 | 8/24/2010 10:49:01 | 24.395 |

|                    |        |                    |        |
|--------------------|--------|--------------------|--------|
| 8/23/2010 13:29:01 | 24.299 | 8/24/2010 11:09:01 | 24.395 |
| 8/23/2010 13:49:01 | 24.361 | 8/24/2010 11:29:01 | 24.395 |
| 8/23/2010 14:09:01 | 24.361 | 8/24/2010 11:49:01 | 24.395 |
| 8/23/2010 14:29:01 | 24.361 | 8/24/2010 12:09:01 | 24.395 |
| 8/23/2010 14:49:01 | 24.424 | 8/24/2010 12:29:01 | 24.395 |
| 8/23/2010 15:09:01 | 24.424 | 8/24/2010 12:49:01 | 24.395 |
| 8/23/2010 15:29:01 | 24.486 | 8/24/2010 13:09:01 | 24.332 |
| 8/23/2010 15:49:01 | 24.486 | 8/24/2010 13:29:01 | 24.395 |
| 8/23/2010 16:09:01 | 24.549 | 8/24/2010 13:49:01 | 24.332 |
| 8/23/2010 16:29:01 | 24.611 | 8/24/2010 14:09:01 | 24.332 |
| 8/23/2010 16:49:01 | 24.611 | 8/24/2010 14:29:01 | 24.332 |
| 8/23/2010 17:09:01 | 24.674 | 8/24/2010 14:49:01 | 24.332 |
| 8/23/2010 17:29:01 | 24.674 | 8/24/2010 15:09:01 | 24.395 |
| 8/23/2010 17:49:01 | 24.736 | 8/24/2010 15:29:01 | 24.395 |
| 8/23/2010 18:09:01 | 24.799 | 8/24/2010 15:49:01 | 24.395 |
| 8/23/2010 18:29:01 | 24.799 | 8/24/2010 16:09:01 | 24.395 |
| 8/23/2010 18:49:01 | 24.799 | 8/24/2010 16:29:01 | 24.395 |
| 8/23/2010 19:09:01 | 24.861 | 8/24/2010 16:49:01 | 24.395 |
| 8/23/2010 19:29:01 | 24.861 | 8/24/2010 17:09:01 | 24.395 |
| 8/23/2010 19:49:01 | 24.861 | 8/24/2010 17:29:01 | 24.395 |
| 8/23/2010 20:09:01 | 24.924 | 8/24/2010 17:49:01 | 24.457 |
| 8/23/2010 20:29:01 | 24.924 | 8/24/2010 18:09:01 | 24.457 |
| 8/23/2010 20:49:01 | 24.924 | 8/24/2010 18:29:01 | 24.457 |
| 8/23/2010 21:09:01 | 24.924 | 8/24/2010 18:49:01 | 24.457 |
| 8/23/2010 21:29:01 | 24.924 | 8/24/2010 19:09:01 | 24.52  |
| 8/23/2010 21:49:01 | 24.986 | 8/24/2010 19:29:01 | 24.52  |
| 8/23/2010 22:09:01 | 24.986 | 8/24/2010 19:49:01 | 24.52  |
| 8/23/2010 22:29:01 | 24.986 | 8/24/2010 20:09:01 | 24.52  |
| 8/23/2010 22:49:01 | 24.986 | 8/24/2010 20:29:01 | 24.582 |
| 8/23/2010 23:09:01 | 24.924 | 8/24/2010 20:49:01 | 24.582 |
| 8/23/2010 23:29:01 | 24.924 | 8/24/2010 21:09:01 | 24.582 |
| 8/23/2010 23:49:01 | 24.924 | 8/24/2010 21:29:01 | 24.582 |
| 8/24/2010 00:09:01 | 24.924 | 8/24/2010 21:49:01 | 24.645 |
| 8/24/2010 00:29:01 | 24.924 | 8/24/2010 22:09:01 | 24.645 |
| 8/24/2010 00:49:01 | 24.924 | 8/24/2010 22:29:01 | 24.645 |
| 8/24/2010 01:09:01 | 24.924 | 8/24/2010 22:49:01 | 24.645 |
| 8/24/2010 01:29:01 | 24.924 | 8/24/2010 23:09:01 | 24.708 |
| 8/24/2010 01:49:01 | 24.861 | 8/24/2010 23:29:01 | 24.708 |
| 8/24/2010 02:09:01 | 24.861 | 8/24/2010 23:49:01 | 24.708 |
| 8/24/2010 02:29:01 | 24.861 | 8/25/2010 00:09:01 | 24.708 |
| 8/24/2010 02:49:01 | 24.861 | 8/25/2010 00:29:01 | 24.708 |
| 8/24/2010 03:09:01 | 24.861 | 8/25/2010 00:49:01 | 24.708 |
| 8/24/2010 03:29:01 | 24.799 | 8/25/2010 01:09:01 | 24.708 |
| 8/24/2010 03:49:01 | 24.799 | 8/25/2010 01:29:01 | 24.77  |
| 8/24/2010 04:09:01 | 24.799 | 8/25/2010 01:49:01 | 24.77  |
| 8/24/2010 04:29:01 | 24.799 | 8/25/2010 02:09:01 | 24.77  |
| 8/24/2010 04:49:01 | 24.799 | 8/25/2010 02:29:01 | 24.77  |
| 8/24/2010 05:09:01 | 24.736 | 8/25/2010 02:49:01 | 24.77  |
| 8/24/2010 05:29:01 | 24.736 | 8/25/2010 03:09:01 | 24.77  |
| 8/24/2010 05:49:01 | 24.736 | 8/25/2010 03:29:01 | 24.77  |

|                    |        |                    |        |
|--------------------|--------|--------------------|--------|
| 8/24/2010 06:09:01 | 24.736 | 8/25/2010 03:49:01 | 24.77  |
| 8/24/2010 06:29:01 | 24.674 | 8/25/2010 04:09:01 | 24.77  |
| 8/24/2010 06:49:01 | 24.674 | 8/25/2010 04:29:01 | 24.77  |
| 8/24/2010 07:09:01 | 24.674 | 8/25/2010 04:49:01 | 24.77  |
| 8/24/2010 07:29:01 | 24.674 | 8/25/2010 05:09:01 | 24.77  |
| 8/24/2010 07:49:01 | 24.611 | 8/25/2010 05:29:01 | 24.708 |
| 8/24/2010 08:09:01 | 24.611 | 8/25/2010 05:49:01 | 24.708 |
| 8/24/2010 08:29:01 | 24.611 | 8/25/2010 06:09:01 | 24.708 |
| 8/24/2010 08:49:01 | 24.611 | 8/25/2010 06:29:01 | 24.708 |
| 8/24/2010 09:09:01 | 24.549 | 8/25/2010 06:49:01 | 24.708 |
| 8/24/2010 09:29:01 | 24.549 | 8/25/2010 07:09:01 | 24.708 |
| 8/24/2010 09:49:01 | 24.549 | 8/25/2010 07:29:01 | 24.708 |
| 8/24/2010 10:09:01 | 24.549 | 8/25/2010 07:49:01 | 24.708 |
| 8/24/2010 10:29:01 | 24.549 | 8/25/2010 08:09:01 | 24.645 |
| 8/24/2010 10:49:01 | 24.486 | 8/25/2010 08:29:01 | 24.645 |
| 8/24/2010 11:09:01 | 24.486 | 8/25/2010 08:49:01 | 24.645 |
| 8/24/2010 11:29:01 | 24.486 | 8/25/2010 09:09:01 | 24.645 |
| 8/24/2010 11:49:01 | 24.486 | 8/25/2010 09:29:01 | 24.582 |
| 8/24/2010 12:09:01 | 24.486 | 8/25/2010 09:49:01 | 24.582 |
| 8/24/2010 12:29:01 | 24.486 | 8/25/2010 10:09:01 | 24.582 |
| 8/24/2010 12:49:01 | 24.486 | 8/25/2010 10:29:01 | 24.582 |
| 8/24/2010 13:09:01 | 24.486 | 8/25/2010 10:49:01 | 24.582 |
| 8/24/2010 13:29:01 | 24.549 | 8/25/2010 11:09:01 | 24.52  |
| 8/24/2010 13:49:01 | 24.549 | 8/25/2010 11:29:01 | 24.52  |
| 8/24/2010 14:09:01 | 24.549 | 8/25/2010 11:49:01 | 24.52  |
| 8/24/2010 14:29:01 | 24.611 | 8/25/2010 12:09:01 | 24.52  |
| 8/24/2010 14:49:01 | 24.611 | 8/25/2010 12:29:01 | 24.457 |
| 8/24/2010 15:09:01 | 24.674 | 8/25/2010 12:49:01 | 24.457 |
| 8/24/2010 15:29:01 | 24.674 | 8/25/2010 13:09:01 | 24.457 |
| 8/24/2010 15:49:01 | 24.736 | 8/25/2010 13:29:01 | 24.457 |
| 8/24/2010 16:09:01 | 24.736 | 8/25/2010 13:49:01 | 24.395 |
| 8/24/2010 16:29:01 | 24.799 | 8/25/2010 14:09:01 | 24.395 |
| 8/24/2010 16:49:01 | 24.861 | 8/25/2010 14:29:01 | 24.395 |
| 8/24/2010 17:09:01 | 24.861 | 8/25/2010 14:49:01 | 24.395 |
| 8/24/2010 17:29:01 | 24.924 | 8/25/2010 15:09:01 | 24.395 |
| 8/24/2010 17:49:01 | 24.924 | 8/25/2010 15:29:01 | 24.395 |
| 8/24/2010 18:09:01 | 24.986 | 8/25/2010 15:49:01 | 24.395 |
| 8/24/2010 18:29:01 | 24.986 | 8/25/2010 16:09:01 | 24.395 |
| 8/24/2010 18:49:01 | 25.049 | 8/25/2010 16:29:01 | 24.395 |
| 8/24/2010 19:09:01 | 25.049 | 8/25/2010 16:49:01 | 24.395 |
| 8/24/2010 19:29:01 | 25.049 | 8/25/2010 17:09:01 | 24.395 |
| 8/24/2010 19:49:01 | 25.111 | 8/25/2010 17:29:01 | 24.395 |
| 8/24/2010 20:09:01 | 25.111 | 8/25/2010 17:49:01 | 24.395 |
| 8/24/2010 20:29:01 | 25.111 | 8/25/2010 18:09:01 | 24.395 |
| 8/24/2010 20:49:01 | 25.111 | 8/25/2010 18:29:01 | 24.395 |
| 8/24/2010 21:09:01 | 25.111 | 8/25/2010 18:49:01 | 24.395 |
| 8/24/2010 21:29:01 | 25.111 | 8/25/2010 19:09:01 | 24.457 |
| 8/24/2010 21:49:01 | 25.111 | 8/25/2010 19:29:01 | 24.457 |
| 8/24/2010 22:09:01 | 25.111 | 8/25/2010 19:49:01 | 24.457 |
| 8/24/2010 22:29:01 | 25.111 | 8/25/2010 20:09:01 | 24.457 |



|                    |        |                    |        |
|--------------------|--------|--------------------|--------|
| 8/24/2010 22:49:01 | 25.111 | 8/25/2010 20:29:01 | 24.457 |
| 8/24/2010 23:09:01 | 25.111 | 8/25/2010 20:49:01 | 24.457 |
| 8/24/2010 23:29:01 | 25.111 | 8/25/2010 21:09:01 | 24.52  |
| 8/24/2010 23:49:01 | 25.111 | 8/25/2010 21:29:01 | 24.52  |
| 8/25/2010 00:09:01 | 25.111 | 8/25/2010 21:49:01 | 24.52  |
| 8/25/2010 00:29:01 | 25.111 | 8/25/2010 22:09:01 | 24.52  |
| 8/25/2010 00:49:01 | 25.049 | 8/25/2010 22:29:01 | 24.582 |
| 8/25/2010 01:09:01 | 25.049 | 8/25/2010 22:49:01 | 24.582 |
| 8/25/2010 01:29:01 | 25.049 | 8/25/2010 23:09:01 | 24.582 |
| 8/25/2010 01:49:01 | 25.049 | 8/25/2010 23:29:01 | 24.582 |
| 8/25/2010 02:09:01 | 24.986 | 8/25/2010 23:49:01 | 24.582 |
| 8/25/2010 02:29:01 | 24.986 | 8/26/2010 00:09:01 | 24.582 |
| 8/25/2010 02:49:01 | 24.986 | 8/26/2010 00:29:01 | 24.582 |
| 8/25/2010 03:09:01 | 24.924 | 8/26/2010 00:49:01 | 24.645 |
| 8/25/2010 03:29:01 | 24.924 | 8/26/2010 01:09:01 | 24.645 |
| 8/25/2010 03:49:01 | 24.924 | 8/26/2010 01:29:01 | 24.645 |
| 8/25/2010 04:09:01 | 24.861 | 8/26/2010 01:49:01 | 24.645 |
| 8/25/2010 04:29:01 | 24.861 | 8/26/2010 02:09:01 | 24.645 |
| 8/25/2010 04:49:01 | 24.799 | 8/26/2010 02:29:01 | 24.645 |
| 8/25/2010 05:09:01 | 24.799 | 8/26/2010 02:49:01 | 24.645 |
| 8/25/2010 05:29:01 | 24.736 | 8/26/2010 03:09:01 | 24.645 |
| 8/25/2010 05:49:01 | 24.736 | 8/26/2010 03:29:01 | 24.645 |
| 8/25/2010 06:09:01 | 24.674 | 8/26/2010 03:49:01 | 24.645 |
| 8/25/2010 06:29:01 | 24.674 | 8/26/2010 04:09:01 | 24.645 |
| 8/25/2010 06:49:01 | 24.611 | 8/26/2010 04:29:01 | 24.645 |
| 8/25/2010 07:09:01 | 24.611 | 8/26/2010 04:49:01 | 24.645 |
| 8/25/2010 07:29:01 | 24.611 | 8/26/2010 05:09:01 | 24.645 |
| 8/25/2010 07:49:01 | 24.549 | 8/26/2010 05:29:01 | 24.645 |
| 8/25/2010 08:09:01 | 24.486 | 8/26/2010 05:49:01 | 24.645 |
| 8/25/2010 08:29:01 | 24.486 | 8/26/2010 06:09:01 | 24.645 |
| 8/25/2010 08:49:01 | 24.424 | 8/26/2010 06:29:01 | 24.645 |
| 8/25/2010 09:09:01 | 24.424 | 8/26/2010 06:49:01 | 24.645 |
| 8/25/2010 09:29:01 | 24.361 | 8/26/2010 07:09:01 | 24.645 |
| 8/25/2010 09:49:01 | 24.361 | 8/26/2010 07:29:01 | 24.645 |
| 8/25/2010 10:09:01 | 24.361 | 8/26/2010 07:49:01 | 24.582 |
| 8/25/2010 10:29:01 | 24.299 | 8/26/2010 08:09:01 | 24.582 |
| 8/25/2010 10:49:01 | 24.299 | 8/26/2010 08:29:01 | 24.582 |
| 8/25/2010 11:09:01 | 24.236 | 8/26/2010 08:49:01 | 24.582 |
| 8/25/2010 11:29:01 | 24.236 | 8/26/2010 09:09:01 | 24.582 |
| 8/25/2010 11:49:01 | 24.236 | 8/26/2010 09:29:01 | 24.52  |
| 8/25/2010 12:09:01 | 24.236 | 8/26/2010 09:49:01 | 24.52  |
| 8/25/2010 12:29:01 | 24.174 | 8/26/2010 10:09:01 | 24.52  |
| 8/25/2010 12:49:01 | 24.174 | 8/26/2010 10:29:01 | 24.52  |
| 8/25/2010 13:09:01 | 24.174 | 8/26/2010 10:49:01 | 24.457 |
| 8/25/2010 13:29:01 | 24.174 | 8/26/2010 11:09:01 | 24.457 |
| 8/25/2010 13:49:01 | 24.174 | 8/26/2010 11:29:01 | 24.457 |
| 8/25/2010 14:09:01 | 24.236 | 8/26/2010 11:49:01 | 24.457 |
| 8/25/2010 14:29:01 | 24.236 | 8/26/2010 12:09:01 | 24.457 |
| 8/25/2010 14:49:01 | 24.299 | 8/26/2010 12:29:01 | 24.395 |
| 8/25/2010 15:09:01 | 24.299 | 8/26/2010 12:49:01 | 24.395 |

|                    |        |                    |        |
|--------------------|--------|--------------------|--------|
| 8/25/2010 15:29:01 | 24.361 | 8/26/2010 13:09:01 | 24.395 |
| 8/25/2010 15:49:01 | 24.361 | 8/26/2010 13:29:01 | 24.395 |
| 8/25/2010 16:09:01 | 24.424 | 8/26/2010 13:49:01 | 24.395 |
| 8/25/2010 16:29:01 | 24.486 | 8/26/2010 14:09:01 | 24.332 |
| 8/25/2010 16:49:01 | 24.549 | 8/26/2010 14:29:01 | 24.332 |
| 8/25/2010 17:09:01 | 24.549 | 8/26/2010 14:49:01 | 24.332 |
| 8/25/2010 17:29:01 | 24.611 | 8/26/2010 15:09:01 | 24.332 |
| 8/25/2010 17:49:01 | 24.674 | 8/26/2010 15:29:01 | 24.332 |
| 8/25/2010 18:09:01 | 24.674 | 8/26/2010 15:49:01 | 24.332 |
| 8/25/2010 18:29:01 | 24.736 | 8/26/2010 16:09:01 | 24.332 |
| 8/25/2010 18:49:01 | 24.799 | 8/26/2010 16:29:01 | 24.332 |
| 8/25/2010 19:09:01 | 24.799 | 8/26/2010 16:49:01 | 24.332 |
| 8/25/2010 19:29:01 | 24.861 | 8/26/2010 17:09:01 | 24.332 |
| 8/25/2010 19:49:01 | 24.861 | 8/26/2010 17:29:01 | 24.332 |
| 8/25/2010 20:09:01 | 24.861 | 8/26/2010 17:49:01 | 24.332 |
| 8/25/2010 20:29:01 | 24.924 | 8/26/2010 18:09:01 | 24.332 |
| 8/25/2010 20:49:01 | 24.924 | 8/26/2010 18:29:01 | 24.332 |
| 8/25/2010 21:09:01 | 24.924 | 8/26/2010 18:49:01 | 24.332 |
| 8/25/2010 21:29:01 | 24.986 | 8/26/2010 19:09:01 | 24.395 |
| 8/25/2010 21:49:01 | 24.986 | 8/26/2010 19:29:01 | 24.395 |
| 8/25/2010 22:09:01 | 24.986 | 8/26/2010 19:49:01 | 24.395 |
| 8/25/2010 22:29:01 | 24.986 | 8/26/2010 20:09:01 | 24.395 |
| 8/25/2010 22:49:01 | 24.986 | 8/26/2010 20:29:01 | 24.395 |
| 8/25/2010 23:09:01 | 24.986 | 8/26/2010 20:49:01 | 24.395 |
| 8/25/2010 23:29:01 | 24.986 | 8/26/2010 21:09:01 | 24.457 |
| 8/25/2010 23:49:01 | 24.986 | 8/26/2010 21:29:01 | 24.457 |
| 8/26/2010 00:09:01 | 24.986 | 8/26/2010 21:49:01 | 24.457 |
| 8/26/2010 00:29:01 | 24.986 | 8/26/2010 22:09:01 | 24.457 |
| 8/26/2010 00:49:01 | 24.986 | 8/26/2010 22:29:01 | 24.457 |
| 8/26/2010 01:09:01 | 24.924 | 8/26/2010 22:49:01 | 24.52  |
| 8/26/2010 01:29:01 | 24.924 | 8/26/2010 23:09:01 | 24.52  |
| 8/26/2010 01:49:01 | 24.924 | 8/26/2010 23:29:01 | 24.52  |
| 8/26/2010 02:09:01 | 24.924 | 8/26/2010 23:49:01 | 24.52  |
| 8/26/2010 02:29:01 | 24.924 | 8/27/2010 00:09:01 | 24.52  |
| 8/26/2010 02:49:01 | 24.861 | 8/27/2010 00:29:01 | 24.52  |
| 8/26/2010 03:09:01 | 24.861 | 8/27/2010 00:49:01 | 24.52  |
| 8/26/2010 03:29:01 | 24.861 | 8/27/2010 01:09:01 | 24.582 |
| 8/26/2010 03:49:01 | 24.799 | 8/27/2010 01:29:01 | 24.582 |
| 8/26/2010 04:09:01 | 24.799 | 8/27/2010 01:49:01 | 24.582 |
| 8/26/2010 04:29:01 | 24.799 | 8/27/2010 02:09:01 | 24.582 |
| 8/26/2010 04:49:01 | 24.736 | 8/27/2010 02:29:01 | 24.582 |
| 8/26/2010 05:09:01 | 24.736 | 8/27/2010 02:49:01 | 24.582 |
| 8/26/2010 05:29:01 | 24.674 | 8/27/2010 03:09:01 | 24.582 |
| 8/26/2010 05:49:01 | 24.674 | 8/27/2010 03:29:01 | 24.582 |
| 8/26/2010 06:09:01 | 24.674 | 8/27/2010 03:49:01 | 24.582 |
| 8/26/2010 06:29:01 | 24.611 | 8/27/2010 04:09:01 | 24.582 |
| 8/26/2010 06:49:01 | 24.611 | 8/27/2010 04:29:01 | 24.582 |
| 8/26/2010 07:09:01 | 24.549 | 8/27/2010 04:49:01 | 24.582 |
| 8/26/2010 07:29:01 | 24.549 | 8/27/2010 05:09:01 | 24.582 |
| 8/26/2010 07:49:01 | 24.486 | 8/27/2010 05:29:01 | 24.582 |

|                    |        |                    |        |
|--------------------|--------|--------------------|--------|
| 8/26/2010 08:09:01 | 24.486 | 8/27/2010 05:49:01 | 24.582 |
| 8/26/2010 08:29:01 | 24.424 | 8/27/2010 06:09:01 | 24.582 |
| 8/26/2010 08:49:01 | 24.424 | 8/27/2010 06:29:01 | 24.52  |
| 8/26/2010 09:09:01 | 24.361 | 8/27/2010 06:49:01 | 24.52  |
| 8/26/2010 09:29:01 | 24.361 | 8/27/2010 07:09:01 | 24.52  |
| 8/26/2010 09:49:01 | 24.299 | 8/27/2010 07:29:01 | 24.52  |
| 8/26/2010 10:09:01 | 24.299 | 8/27/2010 07:49:01 | 24.52  |
| 8/26/2010 10:29:01 | 24.236 | 8/27/2010 08:09:01 | 24.52  |
| 8/26/2010 10:49:01 | 24.236 | 8/27/2010 08:29:01 | 24.52  |
| 8/26/2010 11:09:01 | 24.236 | 8/27/2010 08:49:01 | 24.457 |
| 8/26/2010 11:29:01 | 24.174 | 8/27/2010 09:09:01 | 24.457 |
| 8/26/2010 11:49:01 | 24.174 | 8/27/2010 09:29:01 | 24.457 |
| 8/26/2010 12:09:01 | 24.174 | 8/27/2010 09:49:01 | 24.457 |
| 8/26/2010 12:29:01 | 24.111 | 8/27/2010 10:09:01 | 24.457 |
| 8/26/2010 12:49:01 | 24.111 | 8/27/2010 10:29:01 | 24.395 |
| 8/26/2010 13:09:01 | 24.111 | 8/27/2010 10:49:01 | 24.395 |
| 8/26/2010 13:29:01 | 24.111 | 8/27/2010 11:09:01 | 24.395 |
| 8/26/2010 13:49:01 | 24.111 | 8/27/2010 11:29:01 | 24.395 |
| 8/26/2010 14:09:01 | 24.174 | 8/27/2010 11:49:01 | 24.332 |
| 8/26/2010 14:29:01 | 24.174 | 8/27/2010 12:09:01 | 24.332 |
| 8/26/2010 14:49:01 | 24.236 | 8/27/2010 12:29:01 | 24.332 |
| 8/26/2010 15:09:01 | 24.236 | 8/27/2010 12:49:01 | 24.332 |
| 8/26/2010 15:29:01 | 24.299 | 8/27/2010 13:09:01 | 24.332 |
| 8/26/2010 15:49:01 | 24.299 | 8/27/2010 13:29:01 | 24.27  |
| 8/26/2010 16:09:01 | 24.361 | 8/27/2010 13:49:01 | 24.27  |
| 8/26/2010 16:29:01 | 24.361 | 8/27/2010 14:09:01 | 24.27  |
| 8/26/2010 16:49:01 | 24.424 | 8/27/2010 14:29:01 | 24.27  |
| 8/26/2010 17:09:01 | 24.486 | 8/27/2010 14:49:01 | 24.27  |
| 8/26/2010 17:29:01 | 24.486 | 8/27/2010 15:09:01 | 24.27  |
| 8/26/2010 17:49:01 | 24.549 | 8/27/2010 15:29:01 | 24.27  |
| 8/26/2010 18:09:01 | 24.611 | 8/27/2010 15:49:01 | 24.27  |
| 8/26/2010 18:29:01 | 24.611 | 8/27/2010 16:09:01 | 24.207 |
| 8/26/2010 18:49:01 | 24.674 | 8/27/2010 16:29:01 | 24.27  |
| 8/26/2010 19:09:01 | 24.674 | 8/27/2010 16:49:01 | 24.27  |
| 8/26/2010 19:29:01 | 24.736 | 8/27/2010 17:09:01 | 24.27  |
| 8/26/2010 19:49:01 | 24.736 | 8/27/2010 17:29:01 | 24.27  |
| 8/26/2010 20:09:01 | 24.799 | 8/27/2010 17:49:01 | 24.27  |
| 8/26/2010 20:29:01 | 24.799 | 8/27/2010 18:09:01 | 24.27  |
| 8/26/2010 20:49:01 | 24.799 | 8/27/2010 18:29:01 | 24.27  |
| 8/26/2010 21:09:01 | 24.799 | 8/27/2010 18:49:01 | 24.27  |
| 8/26/2010 21:29:01 | 24.799 | 8/27/2010 19:09:01 | 24.332 |
| 8/26/2010 21:49:01 | 24.861 | 8/27/2010 19:29:01 | 24.332 |
| 8/26/2010 22:09:01 | 24.861 | 8/27/2010 19:49:01 | 24.332 |
| 8/26/2010 22:29:01 | 24.861 | 8/27/2010 20:09:01 | 24.332 |
| 8/26/2010 22:49:01 | 24.861 | 8/27/2010 20:29:01 | 24.332 |
| 8/26/2010 23:09:01 | 24.861 | 8/27/2010 20:49:01 | 24.332 |
| 8/26/2010 23:29:01 | 24.861 | 8/27/2010 21:09:01 | 24.395 |
| 8/26/2010 23:49:01 | 24.799 | 8/27/2010 21:29:01 | 24.395 |
| 8/27/2010 00:09:01 | 24.799 | 8/27/2010 21:49:01 | 24.395 |
| 8/27/2010 00:29:01 | 24.799 | 8/27/2010 22:09:01 | 24.395 |

|                    |        |                    |        |
|--------------------|--------|--------------------|--------|
| 8/27/2010 00:49:01 | 24.799 | 8/27/2010 22:29:01 | 24.457 |
| 8/27/2010 01:09:01 | 24.799 | 8/27/2010 22:49:01 | 24.457 |
| 8/27/2010 01:29:01 | 24.799 | 8/27/2010 23:09:01 | 24.457 |
| 8/27/2010 01:49:01 | 24.799 | 8/27/2010 23:29:01 | 24.457 |
| 8/27/2010 02:09:01 | 24.736 | 8/27/2010 23:49:01 | 24.52  |
| 8/27/2010 02:29:01 | 24.736 | 8/28/2010 00:09:01 | 24.52  |
| 8/27/2010 02:49:01 | 24.736 | 8/28/2010 00:29:01 | 24.52  |
| 8/27/2010 03:09:01 | 24.736 | 8/28/2010 00:49:01 | 24.52  |
| 8/27/2010 03:29:01 | 24.674 | 8/28/2010 01:09:01 | 24.52  |
| 8/27/2010 03:49:01 | 24.674 | 8/28/2010 01:29:01 | 24.52  |
| 8/27/2010 04:09:01 | 24.674 | 8/28/2010 01:49:01 | 24.582 |
| 8/27/2010 04:29:01 | 24.611 | 8/28/2010 02:09:01 | 24.582 |
| 8/27/2010 04:49:01 | 24.611 | 8/28/2010 02:29:01 | 24.582 |
| 8/27/2010 05:09:01 | 24.549 | 8/28/2010 02:49:01 | 24.582 |
| 8/27/2010 05:29:01 | 24.549 | 8/28/2010 03:09:01 | 24.582 |
| 8/27/2010 05:49:01 | 24.549 | 8/28/2010 03:29:01 | 24.582 |
| 8/27/2010 06:09:01 | 24.486 | 8/28/2010 03:49:01 | 24.582 |
| 8/27/2010 06:29:01 | 24.486 | 8/28/2010 04:09:01 | 24.582 |
| 8/27/2010 06:49:01 | 24.486 | 8/28/2010 04:29:01 | 24.582 |
| 8/27/2010 07:09:01 | 24.424 | 8/28/2010 04:49:01 | 24.582 |
| 8/27/2010 07:29:01 | 24.424 | 8/28/2010 05:09:01 | 24.582 |
| 8/27/2010 07:49:01 | 24.361 | 8/28/2010 05:29:01 | 24.582 |
| 8/27/2010 08:09:01 | 24.361 | 8/28/2010 05:49:01 | 24.582 |
| 8/27/2010 08:29:01 | 24.299 | 8/28/2010 06:09:01 | 24.582 |
| 8/27/2010 08:49:01 | 24.299 | 8/28/2010 06:29:01 | 24.582 |
| 8/27/2010 09:09:01 | 24.236 | 8/28/2010 06:49:01 | 24.582 |
| 8/27/2010 09:29:01 | 24.236 | 8/28/2010 07:09:01 | 24.52  |
| 8/27/2010 09:49:01 | 24.174 | 8/28/2010 07:29:01 | 24.52  |
| 8/27/2010 10:09:01 | 24.174 | 8/28/2010 07:49:01 | 24.52  |
| 8/27/2010 10:29:01 | 24.174 | 8/28/2010 08:09:01 | 24.52  |
| 8/27/2010 10:49:01 | 24.111 | 8/28/2010 08:29:01 | 24.52  |
| 8/27/2010 11:09:01 | 24.111 | 8/28/2010 08:49:01 | 24.52  |
| 8/27/2010 11:29:01 | 24.049 | 8/28/2010 09:09:01 | 24.52  |
| 8/27/2010 11:49:01 | 24.049 | 8/28/2010 09:29:01 | 24.457 |
| 8/27/2010 12:09:01 | 24.049 | 8/28/2010 09:49:01 | 24.457 |
| 8/27/2010 12:29:01 | 24.049 | 8/28/2010 10:09:01 | 24.457 |
| 8/27/2010 12:49:01 | 24.049 | 8/28/2010 10:29:01 | 24.457 |
| 8/27/2010 13:09:01 | 24.049 | 8/28/2010 10:49:01 | 24.457 |
| 8/27/2010 13:29:01 | 24.049 | 8/28/2010 11:09:01 | 24.395 |
| 8/27/2010 13:49:01 | 24.049 | 8/28/2010 11:29:01 | 24.395 |
| 8/27/2010 14:09:01 | 24.049 | 8/28/2010 11:49:01 | 24.395 |
| 8/27/2010 14:29:01 | 24.111 | 8/28/2010 12:09:01 | 24.395 |
| 8/27/2010 14:49:01 | 24.111 | 8/28/2010 12:29:01 | 24.395 |
| 8/27/2010 15:09:01 | 24.174 | 8/28/2010 12:49:01 | 24.332 |
| 8/27/2010 15:29:01 | 24.174 | 8/28/2010 13:09:01 | 24.332 |
| 8/27/2010 15:49:01 | 24.236 | 8/28/2010 13:29:01 | 24.332 |
| 8/27/2010 16:09:01 | 24.299 | 8/28/2010 13:49:01 | 24.332 |
| 8/27/2010 16:29:01 | 24.299 | 8/28/2010 14:09:01 | 24.332 |
| 8/27/2010 16:49:01 | 24.361 | 8/28/2010 14:29:01 | 24.27  |
| 8/27/2010 17:09:01 | 24.424 | 8/28/2010 14:49:01 | 24.27  |

|                    |        |                    |        |
|--------------------|--------|--------------------|--------|
| 8/27/2010 17:29:01 | 24.486 | 8/28/2010 15:09:01 | 24.27  |
| 8/27/2010 17:49:01 | 24.486 | 8/28/2010 15:29:01 | 24.27  |
| 8/27/2010 18:09:01 | 24.549 | 8/28/2010 15:49:01 | 24.27  |
| 8/27/2010 18:29:01 | 24.611 | 8/28/2010 16:09:01 | 24.27  |
| 8/27/2010 18:49:01 | 24.611 | 8/28/2010 16:29:01 | 24.27  |
| 8/27/2010 19:09:01 | 24.674 | 8/28/2010 16:49:01 | 24.27  |
| 8/27/2010 19:29:01 | 24.736 | 8/28/2010 17:09:01 | 24.27  |
| 8/27/2010 19:49:01 | 24.736 | 8/28/2010 17:29:01 | 24.27  |
| 8/27/2010 20:09:01 | 24.799 | 8/28/2010 17:49:01 | 24.27  |
| 8/27/2010 20:29:01 | 24.799 | 8/28/2010 18:09:01 | 24.27  |
| 8/27/2010 20:49:01 | 24.799 | 8/28/2010 18:29:01 | 24.332 |
| 8/27/2010 21:09:01 | 24.861 | 8/28/2010 18:49:01 | 24.332 |
| 8/27/2010 21:29:01 | 24.861 | 8/28/2010 19:09:01 | 24.332 |
| 8/27/2010 21:49:01 | 24.861 | 8/28/2010 19:29:01 | 24.332 |
| 8/27/2010 22:09:01 | 24.924 | 8/28/2010 19:49:01 | 24.332 |
| 8/27/2010 22:29:01 | 24.924 | 8/28/2010 20:09:01 | 24.332 |
| 8/27/2010 22:49:01 | 24.924 | 8/28/2010 20:29:01 | 24.395 |
| 8/27/2010 23:09:01 | 24.924 | 8/28/2010 20:49:01 | 24.395 |
| 8/27/2010 23:29:01 | 24.924 | 8/28/2010 21:09:01 | 24.395 |
| 8/27/2010 23:49:01 | 24.924 | 8/28/2010 21:29:01 | 24.395 |
| 8/28/2010 00:09:01 | 24.924 | 8/28/2010 21:49:01 | 24.457 |
| 8/28/2010 00:29:01 | 24.924 | 8/28/2010 22:09:01 | 24.457 |
| 8/28/2010 00:49:01 | 24.924 | 8/28/2010 22:29:01 | 24.457 |
| 8/28/2010 01:09:01 | 24.861 | 8/28/2010 22:49:01 | 24.457 |
| 8/28/2010 01:29:01 | 24.861 | 8/28/2010 23:09:01 | 24.52  |
| 8/28/2010 01:49:01 | 24.861 | 8/28/2010 23:29:01 | 24.52  |
| 8/28/2010 02:09:01 | 24.861 | 8/28/2010 23:49:01 | 24.52  |
| 8/28/2010 02:29:01 | 24.861 | 8/29/2010 00:09:01 | 24.52  |
| 8/28/2010 02:49:01 | 24.861 | 8/29/2010 00:29:01 | 24.52  |
| 8/28/2010 03:09:01 | 24.799 | 8/29/2010 00:49:01 | 24.52  |
| 8/28/2010 03:29:01 | 24.799 | 8/29/2010 01:09:01 | 24.582 |
| 8/28/2010 03:49:01 | 24.799 | 8/29/2010 01:29:01 | 24.582 |
| 8/28/2010 04:09:01 | 24.736 | 8/29/2010 01:49:01 | 24.582 |
| 8/28/2010 04:29:01 | 24.736 | 8/29/2010 02:09:01 | 24.582 |
| 8/28/2010 04:49:01 | 24.736 | 8/29/2010 02:29:01 | 24.582 |
| 8/28/2010 05:09:01 | 24.674 | 8/29/2010 02:49:01 | 24.582 |
| 8/28/2010 05:29:01 | 24.674 | 8/29/2010 03:09:01 | 24.582 |
| 8/28/2010 05:49:01 | 24.611 | 8/29/2010 03:29:01 | 24.582 |
| 8/28/2010 06:09:01 | 24.611 | 8/29/2010 03:49:01 | 24.582 |
| 8/28/2010 06:29:01 | 24.611 | 8/29/2010 04:09:01 | 24.582 |
| 8/28/2010 06:49:01 | 24.549 | 8/29/2010 04:29:01 | 24.582 |
| 8/28/2010 07:09:01 | 24.549 | 8/29/2010 04:49:01 | 24.582 |
| 8/28/2010 07:29:01 | 24.486 | 8/29/2010 05:09:01 | 24.582 |
| 8/28/2010 07:49:01 | 24.486 | 8/29/2010 05:29:01 | 24.582 |
| 8/28/2010 08:09:01 | 24.424 | 8/29/2010 05:49:01 | 24.582 |
| 8/28/2010 08:29:01 | 24.424 | 8/29/2010 06:09:01 | 24.582 |
| 8/28/2010 08:49:01 | 24.424 | 8/29/2010 06:29:01 | 24.582 |
| 8/28/2010 09:09:01 | 24.361 | 8/29/2010 06:49:01 | 24.582 |
| 8/28/2010 09:29:01 | 24.361 | 8/29/2010 07:09:01 | 24.582 |
| 8/28/2010 09:49:01 | 24.299 | 8/29/2010 07:29:01 | 24.582 |

|                    |        |                    |        |
|--------------------|--------|--------------------|--------|
| 8/28/2010 10:09:01 | 24.299 | 8/29/2010 07:49:01 | 24.582 |
| 8/28/2010 10:29:01 | 24.236 | 8/29/2010 08:09:01 | 24.582 |
| 8/28/2010 10:49:01 | 24.236 | 8/29/2010 08:29:01 | 24.52  |
| 8/28/2010 11:09:01 | 24.236 | 8/29/2010 08:49:01 | 24.52  |
| 8/28/2010 11:29:01 | 24.174 | 8/29/2010 09:09:01 | 24.52  |
| 8/28/2010 11:49:01 | 24.174 | 8/29/2010 09:29:01 | 24.52  |
| 8/28/2010 12:09:01 | 24.174 | 8/29/2010 09:49:01 | 24.52  |
| 8/28/2010 12:29:01 | 24.174 | 8/29/2010 10:09:01 | 24.52  |
| 8/28/2010 12:49:01 | 24.111 | 8/29/2010 10:29:01 | 24.457 |
| 8/28/2010 13:09:01 | 24.111 | 8/29/2010 10:49:01 | 24.457 |
| 8/28/2010 13:29:01 | 24.111 | 8/29/2010 11:09:01 | 24.457 |
| 8/28/2010 13:49:01 | 24.174 | 8/29/2010 11:29:01 | 24.457 |
| 8/28/2010 14:09:01 | 24.174 | 8/29/2010 11:49:01 | 24.457 |
| 8/28/2010 14:29:01 | 24.174 | 8/29/2010 12:09:01 | 24.395 |
| 8/28/2010 14:49:01 | 24.236 | 8/29/2010 12:29:01 | 24.395 |
| 8/28/2010 15:09:01 | 24.236 | 8/29/2010 12:49:01 | 24.395 |
| 8/28/2010 15:29:01 | 24.299 | 8/29/2010 13:09:01 | 24.395 |
| 8/28/2010 15:49:01 | 24.299 | 8/29/2010 13:29:01 | 24.395 |
| 8/28/2010 16:09:01 | 24.361 | 8/29/2010 13:49:01 | 24.395 |
| 8/28/2010 16:29:01 | 24.424 | 8/29/2010 14:09:01 | 24.332 |
| 8/28/2010 16:49:01 | 24.424 | 8/29/2010 14:29:01 | 24.332 |
| 8/28/2010 17:09:01 | 24.486 | 8/29/2010 14:49:01 | 24.332 |
| 8/28/2010 17:29:01 | 24.549 | 8/29/2010 15:09:01 | 24.332 |
| 8/28/2010 17:49:01 | 24.611 | 8/29/2010 15:29:01 | 24.332 |
| 8/28/2010 18:09:01 | 24.611 | 8/29/2010 15:49:01 | 24.332 |
| 8/28/2010 18:29:01 | 24.674 | 8/29/2010 16:09:01 | 24.332 |
| 8/28/2010 18:49:01 | 24.736 | 8/29/2010 16:29:01 | 24.332 |
| 8/28/2010 19:09:01 | 24.736 | 8/29/2010 16:49:01 | 24.332 |
| 8/28/2010 19:29:01 | 24.799 | 8/29/2010 17:09:01 | 24.332 |
| 8/28/2010 19:49:01 | 24.799 | 8/29/2010 17:29:01 | 24.332 |
| 8/28/2010 20:09:01 | 24.861 | 8/29/2010 17:49:01 | 24.332 |
| 8/28/2010 20:29:01 | 24.861 | 8/29/2010 18:09:01 | 24.332 |
| 8/28/2010 20:49:01 | 24.861 | 8/29/2010 18:29:01 | 24.395 |
| 8/28/2010 21:09:01 | 24.924 | 8/29/2010 18:49:01 | 24.395 |
| 8/28/2010 21:29:01 | 24.924 | 8/29/2010 19:09:01 | 24.395 |
| 8/28/2010 21:49:01 | 24.924 | 8/29/2010 19:29:01 | 24.395 |
| 8/28/2010 22:09:01 | 24.924 | 8/29/2010 19:49:01 | 24.395 |
| 8/28/2010 22:29:01 | 24.924 | 8/29/2010 20:09:01 | 24.457 |
| 8/28/2010 22:49:01 | 24.924 | 8/29/2010 20:29:01 | 24.457 |
| 8/28/2010 23:09:01 | 24.924 | 8/29/2010 20:49:01 | 24.457 |
| 8/28/2010 23:29:01 | 24.924 | 8/29/2010 21:09:01 | 24.457 |
| 8/28/2010 23:49:01 | 24.924 | 8/29/2010 21:29:01 | 24.52  |
| 8/29/2010 00:09:01 | 24.924 | 8/29/2010 21:49:01 | 24.52  |
| 8/29/2010 00:29:01 | 24.924 | 8/29/2010 22:09:01 | 24.52  |
| 8/29/2010 00:49:01 | 24.924 | 8/29/2010 22:29:01 | 24.52  |
| 8/29/2010 01:09:01 | 24.924 | 8/29/2010 22:49:01 | 24.582 |
| 8/29/2010 01:29:01 | 24.924 | 8/29/2010 23:09:01 | 24.582 |
| 8/29/2010 01:49:01 | 24.861 | 8/29/2010 23:29:01 | 24.582 |
| 8/29/2010 02:09:01 | 24.861 | 8/29/2010 23:49:01 | 24.582 |
| 8/29/2010 02:29:01 | 24.861 | 8/30/2010 00:09:01 | 24.645 |

|                    |        |                    |        |
|--------------------|--------|--------------------|--------|
| 8/29/2010 02:49:01 | 24.861 | 8/30/2010 00:29:01 | 24.645 |
| 8/29/2010 03:09:01 | 24.799 | 8/30/2010 00:49:01 | 24.645 |
| 8/29/2010 03:29:01 | 24.799 | 8/30/2010 01:09:01 | 24.645 |
| 8/29/2010 03:49:01 | 24.799 | 8/30/2010 01:29:01 | 24.645 |
| 8/29/2010 04:09:01 | 24.799 | 8/30/2010 01:49:01 | 24.645 |
| 8/29/2010 04:29:01 | 24.736 | 8/30/2010 02:09:01 | 24.645 |
| 8/29/2010 04:49:01 | 24.736 | 8/30/2010 02:29:01 | 24.645 |
| 8/29/2010 05:09:01 | 24.736 | 8/30/2010 02:49:01 | 24.708 |
| 8/29/2010 05:29:01 | 24.674 | 8/30/2010 03:09:01 | 24.708 |
| 8/29/2010 05:49:01 | 24.674 | 8/30/2010 03:29:01 | 24.708 |
| 8/29/2010 06:09:01 | 24.674 | 8/30/2010 03:49:01 | 24.708 |
| 8/29/2010 06:29:01 | 24.611 | 8/30/2010 04:09:01 | 24.708 |
| 8/29/2010 06:49:01 | 24.611 | 8/30/2010 04:29:01 | 24.708 |
| 8/29/2010 07:09:01 | 24.549 | 8/30/2010 04:49:01 | 24.708 |
| 8/29/2010 07:29:01 | 24.549 | 8/30/2010 05:09:01 | 24.708 |
| 8/29/2010 07:49:01 | 24.549 | 8/30/2010 05:29:01 | 24.708 |
| 8/29/2010 08:09:01 | 24.486 | 8/30/2010 05:49:01 | 24.708 |
| 8/29/2010 08:29:01 | 24.486 | 8/30/2010 06:09:01 | 24.708 |
| 8/29/2010 08:49:01 | 24.424 | 8/30/2010 06:29:01 | 24.708 |
| 8/29/2010 09:09:01 | 24.424 | 8/30/2010 06:49:01 | 24.708 |
| 8/29/2010 09:29:01 | 24.424 | 8/30/2010 07:09:01 | 24.708 |
| 8/29/2010 09:49:01 | 24.361 | 8/30/2010 07:29:01 | 24.708 |
| 8/29/2010 10:09:01 | 24.361 | 8/30/2010 07:49:01 | 24.708 |
| 8/29/2010 10:29:01 | 24.361 | 8/30/2010 08:09:01 | 24.708 |
| 8/29/2010 10:49:01 | 24.299 | 8/30/2010 08:29:01 | 24.708 |
| 8/29/2010 11:09:01 | 24.299 | 8/30/2010 08:49:01 | 24.708 |
| 8/29/2010 11:29:01 | 24.299 | 8/30/2010 09:09:01 | 24.708 |
| 8/29/2010 11:49:01 | 24.299 | 8/30/2010 09:29:01 | 24.708 |
| 8/29/2010 12:09:01 | 24.236 | 8/30/2010 09:49:01 | 24.708 |
| 8/29/2010 12:29:01 | 24.236 | 8/30/2010 10:09:01 | 24.645 |
| 8/29/2010 12:49:01 | 24.236 | 8/30/2010 10:29:01 | 24.645 |
| 8/29/2010 13:09:01 | 24.236 | 8/30/2010 10:49:01 | 24.645 |
| 8/29/2010 13:29:01 | 24.236 | 8/30/2010 11:09:01 | 24.645 |
| 8/29/2010 13:49:01 | 24.299 | 8/30/2010 11:29:01 | 24.645 |
| 8/29/2010 14:09:01 | 24.299 | 8/30/2010 11:49:01 | 24.645 |
| 8/29/2010 14:29:01 | 24.299 | 8/30/2010 12:09:01 | 24.645 |
| 8/29/2010 14:49:01 | 24.299 | 8/30/2010 12:29:01 | 24.645 |
| 8/29/2010 15:09:01 | 24.361 | 8/30/2010 12:49:01 | 24.582 |
| 8/29/2010 15:29:01 | 24.361 | 8/30/2010 13:09:01 | 24.582 |
| 8/29/2010 15:49:01 | 24.424 | 8/30/2010 13:29:01 | 24.582 |
| 8/29/2010 16:09:01 | 24.486 | 8/30/2010 13:49:01 | 24.582 |
| 8/29/2010 16:29:01 | 24.549 | 8/30/2010 14:09:01 | 24.582 |
| 8/29/2010 16:49:01 | 24.549 | 8/30/2010 14:29:01 | 24.582 |
| 8/29/2010 17:09:01 | 24.611 | 8/30/2010 14:49:01 | 24.582 |
| 8/29/2010 17:29:01 | 24.674 | 8/30/2010 15:09:01 | 24.582 |
| 8/29/2010 17:49:01 | 24.674 | 8/30/2010 15:29:01 | 24.582 |
| 8/29/2010 18:09:01 | 24.736 | 8/30/2010 15:49:01 | 24.582 |
| 8/29/2010 18:29:01 | 24.799 | 8/30/2010 16:09:01 | 24.582 |
| 8/29/2010 18:49:01 | 24.861 | 8/30/2010 16:29:01 | 24.582 |
| 8/29/2010 19:09:01 | 24.861 | 8/30/2010 16:49:01 | 24.582 |

|                    |        |                    |        |
|--------------------|--------|--------------------|--------|
| 8/29/2010 19:29:01 | 24.924 | 8/30/2010 17:09:01 | 24.582 |
| 8/29/2010 19:49:01 | 24.924 | 8/30/2010 17:29:01 | 24.582 |
| 8/29/2010 20:09:01 | 24.986 | 8/30/2010 17:49:01 | 24.582 |
| 8/29/2010 20:29:01 | 24.986 | 8/30/2010 18:09:01 | 24.582 |
| 8/29/2010 20:49:01 | 24.986 | 8/30/2010 18:29:01 | 24.645 |
| 8/29/2010 21:09:01 | 25.049 | 8/30/2010 18:49:01 | 24.645 |
| 8/29/2010 21:29:01 | 25.049 | 8/30/2010 19:09:01 | 24.645 |
| 8/29/2010 21:49:01 | 25.049 | 8/30/2010 19:29:01 | 24.645 |
| 8/29/2010 22:09:01 | 25.049 | 8/30/2010 19:49:01 | 24.645 |
| 8/29/2010 22:29:01 | 25.049 | 8/30/2010 20:09:01 | 24.708 |
| 8/29/2010 22:49:01 | 25.049 | 8/30/2010 20:29:01 | 24.708 |
| 8/29/2010 23:09:01 | 25.049 | 8/30/2010 20:49:01 | 24.708 |
| 8/29/2010 23:29:01 | 25.049 | 8/30/2010 21:09:01 | 24.708 |
| 8/29/2010 23:49:01 | 25.049 | 8/30/2010 21:29:01 | 24.77  |
| 8/30/2010 00:09:01 | 25.049 | 8/30/2010 21:49:01 | 24.77  |
| 8/30/2010 00:29:01 | 25.049 | 8/30/2010 22:09:01 | 24.77  |
| 8/30/2010 00:49:01 | 25.049 | 8/30/2010 22:29:01 | 24.77  |
| 8/30/2010 01:09:01 | 25.049 | 8/30/2010 22:49:01 | 24.77  |
| 8/30/2010 01:29:01 | 25.049 | 8/30/2010 23:09:01 | 24.833 |
| 8/30/2010 01:49:01 | 25.049 | 8/30/2010 23:29:01 | 24.833 |
| 8/30/2010 02:09:01 | 25.049 | 8/30/2010 23:49:01 | 24.833 |
| 8/30/2010 02:29:01 | 24.986 | 8/31/2010 00:09:01 | 24.833 |
| 8/30/2010 02:49:01 | 24.986 | 8/31/2010 00:29:01 | 24.833 |
| 8/30/2010 03:09:01 | 24.986 | 8/31/2010 00:49:01 | 24.833 |
| 8/30/2010 03:29:01 | 24.986 | 8/31/2010 01:09:01 | 24.895 |
| 8/30/2010 03:49:01 | 24.986 | 8/31/2010 01:29:01 | 24.895 |
| 8/30/2010 04:09:01 | 24.986 | 8/31/2010 01:49:01 | 24.895 |
| 8/30/2010 04:29:01 | 24.924 | 8/31/2010 02:09:01 | 24.895 |
| 8/30/2010 04:49:01 | 24.924 | 8/31/2010 02:29:01 | 24.895 |
| 8/30/2010 05:09:01 | 24.924 | 8/31/2010 02:49:01 | 24.895 |
| 8/30/2010 05:29:01 | 24.924 | 8/31/2010 03:09:01 | 24.895 |
| 8/30/2010 05:49:01 | 24.861 | 8/31/2010 03:29:01 | 24.895 |
| 8/30/2010 06:09:01 | 24.861 | 8/31/2010 03:49:01 | 24.895 |
| 8/30/2010 06:29:01 | 24.861 | 8/31/2010 04:09:01 | 24.895 |
| 8/30/2010 06:49:01 | 24.861 | 8/31/2010 04:29:01 | 24.895 |
| 8/30/2010 07:09:01 | 24.799 | 8/31/2010 04:49:01 | 24.895 |
| 8/30/2010 07:29:01 | 24.799 | 8/31/2010 05:09:01 | 24.895 |
| 8/30/2010 07:49:01 | 24.799 | 8/31/2010 05:29:01 | 24.895 |
| 8/30/2010 08:09:01 | 24.799 | 8/31/2010 05:49:01 | 24.895 |
| 8/30/2010 08:29:01 | 24.736 | 8/31/2010 06:09:01 | 24.895 |
| 8/30/2010 08:49:01 | 24.736 | 8/31/2010 06:29:01 | 24.895 |
| 8/30/2010 09:09:01 | 24.736 | 8/31/2010 06:49:01 | 24.895 |
| 8/30/2010 09:29:01 | 24.736 | 8/31/2010 07:09:01 | 24.895 |
| 8/30/2010 09:49:01 | 24.674 | 8/31/2010 07:29:01 | 24.895 |
| 8/30/2010 10:09:01 | 24.674 | 8/31/2010 07:49:01 | 24.895 |
| 8/30/2010 10:29:01 | 24.674 | 8/31/2010 08:09:01 | 24.895 |
| 8/30/2010 10:49:01 | 24.674 | 8/31/2010 08:29:01 | 24.895 |
| 8/30/2010 11:09:01 | 24.611 | 8/31/2010 08:49:01 | 24.833 |
| 8/30/2010 11:29:01 | 24.611 | 8/31/2010 09:09:01 | 24.833 |
| 8/30/2010 11:49:01 | 24.611 | 8/31/2010 09:29:01 | 24.833 |



|                    |        |                    |        |
|--------------------|--------|--------------------|--------|
| 8/30/2010 12:09:01 | 24.611 | 8/31/2010 09:49:01 | 24.833 |
| 8/30/2010 12:29:01 | 24.611 | 8/31/2010 10:09:01 | 24.833 |
| 8/30/2010 12:49:01 | 24.611 | 8/31/2010 10:29:01 | 24.833 |
| 8/30/2010 13:09:01 | 24.611 | 8/31/2010 10:49:01 | 24.77  |
| 8/30/2010 13:29:01 | 24.611 | 8/31/2010 11:09:01 | 24.77  |
| 8/30/2010 13:49:01 | 24.611 | 8/31/2010 11:29:01 | 24.77  |
| 8/30/2010 14:09:01 | 24.611 | 8/31/2010 11:49:01 | 24.77  |
| 8/30/2010 14:29:01 | 24.611 | 8/31/2010 12:09:01 | 24.77  |
| 8/30/2010 14:49:01 | 24.611 | 8/31/2010 12:29:01 | 24.77  |
| 8/30/2010 15:09:01 | 24.674 | 8/31/2010 12:49:01 | 24.77  |
| 8/30/2010 15:29:01 | 24.674 | 8/31/2010 13:09:01 | 24.708 |
| 8/30/2010 15:49:01 | 24.736 | 8/31/2010 13:29:01 | 24.708 |
| 8/30/2010 16:09:01 | 24.736 | 8/31/2010 13:49:01 | 24.708 |
| 8/30/2010 16:29:01 | 24.736 | 8/31/2010 14:09:01 | 24.708 |
| 8/30/2010 16:49:01 | 24.799 | 8/31/2010 14:29:01 | 24.708 |
| 8/30/2010 17:09:01 | 24.799 | 8/31/2010 14:49:01 | 24.708 |
| 8/30/2010 17:29:01 | 24.861 | 8/31/2010 15:09:01 | 24.708 |
| 8/30/2010 17:49:01 | 24.861 | 8/31/2010 15:29:01 | 24.645 |
| 8/30/2010 18:09:01 | 24.924 | 8/31/2010 15:49:01 | 24.645 |
| 8/30/2010 18:29:01 | 24.924 | 8/31/2010 16:09:01 | 24.645 |
| 8/30/2010 18:49:01 | 24.986 | 8/31/2010 16:29:01 | 24.645 |
| 8/30/2010 19:09:01 | 24.986 | 8/31/2010 16:49:01 | 24.708 |
| 8/30/2010 19:29:01 | 25.049 | 8/31/2010 17:09:01 | 24.708 |
| 8/30/2010 19:49:01 | 25.049 | 8/31/2010 17:29:01 | 24.708 |
| 8/30/2010 20:09:01 | 25.049 | 8/31/2010 17:49:01 | 24.708 |
| 8/30/2010 20:29:01 | 25.111 | 8/31/2010 18:09:01 | 24.708 |
| 8/30/2010 20:49:01 | 25.111 | 8/31/2010 18:29:01 | 24.708 |
| 8/30/2010 21:09:01 | 25.111 | 8/31/2010 18:49:01 | 24.708 |
| 8/30/2010 21:29:01 | 25.111 | 8/31/2010 19:09:01 | 24.708 |
| 8/30/2010 21:49:01 | 25.174 | 8/31/2010 19:29:01 | 24.77  |
| 8/30/2010 22:09:01 | 25.174 | 8/31/2010 19:49:01 | 24.77  |
| 8/30/2010 22:29:01 | 25.174 | 8/31/2010 20:09:01 | 24.77  |
| 8/30/2010 22:49:01 | 25.174 | 8/31/2010 20:29:01 | 24.77  |
| 8/30/2010 23:09:01 | 25.174 | 8/31/2010 20:49:01 | 24.77  |
| 8/30/2010 23:29:01 | 25.174 | 8/31/2010 21:09:01 | 24.833 |
| 8/30/2010 23:49:01 | 25.174 | 8/31/2010 21:29:01 | 24.833 |
| 8/31/2010 00:09:01 | 25.174 | 8/31/2010 21:49:01 | 24.833 |
| 8/31/2010 00:29:01 | 25.174 | 8/31/2010 22:09:01 | 24.833 |
| 8/31/2010 00:49:01 | 25.174 | 8/31/2010 22:29:01 | 24.895 |
| 8/31/2010 01:09:01 | 25.111 | 8/31/2010 22:49:01 | 24.895 |
| 8/31/2010 01:29:01 | 25.111 | 8/31/2010 23:09:01 | 24.895 |
| 8/31/2010 01:49:01 | 25.111 | 8/31/2010 23:29:01 | 24.895 |
| 8/31/2010 02:09:01 | 25.111 | 8/31/2010 23:49:01 | 24.895 |
| 8/31/2010 02:29:01 | 25.111 | 9/1/2010 00:09:01  | 24.895 |
| 8/31/2010 02:49:01 | 25.111 | 9/1/2010 00:29:01  | 24.958 |
| 8/31/2010 03:09:01 | 25.049 | 9/1/2010 00:49:01  | 24.958 |
| 8/31/2010 03:29:01 | 25.049 | 9/1/2010 01:09:01  | 24.958 |
| 8/31/2010 03:49:01 | 25.049 | 9/1/2010 01:29:01  | 24.958 |
| 8/31/2010 04:09:01 | 25.049 | 9/1/2010 01:49:01  | 24.958 |
| 8/31/2010 04:29:01 | 24.986 | 9/1/2010 02:09:01  | 24.958 |

|                    |        |                   |        |
|--------------------|--------|-------------------|--------|
| 8/31/2010 04:49:01 | 24.986 | 9/1/2010 02:29:01 | 24.958 |
| 8/31/2010 05:09:01 | 24.986 | 9/1/2010 02:49:01 | 24.958 |
| 8/31/2010 05:29:01 | 24.924 | 9/1/2010 03:09:01 | 24.958 |
| 8/31/2010 05:49:01 | 24.924 | 9/1/2010 03:29:01 | 24.958 |
| 8/31/2010 06:09:01 | 24.924 | 9/1/2010 03:49:01 | 24.958 |
| 8/31/2010 06:29:01 | 24.924 | 9/1/2010 04:09:01 | 24.958 |
| 8/31/2010 06:49:01 | 24.861 | 9/1/2010 04:29:01 | 24.958 |
| 8/31/2010 07:09:01 | 24.861 | 9/1/2010 04:49:01 | 24.958 |
| 8/31/2010 07:29:01 | 24.861 | 9/1/2010 05:09:01 | 24.958 |
| 8/31/2010 07:49:01 | 24.799 | 9/1/2010 05:29:01 | 24.958 |
| 8/31/2010 08:09:01 | 24.799 | 9/1/2010 05:49:01 | 24.958 |
| 8/31/2010 08:29:01 | 24.736 | 9/1/2010 06:09:01 | 24.958 |
| 8/31/2010 08:49:01 | 24.736 | 9/1/2010 06:29:01 | 24.958 |
| 8/31/2010 09:09:01 | 24.736 | 9/1/2010 06:49:01 | 24.958 |
| 8/31/2010 09:29:01 | 24.674 | 9/1/2010 07:09:01 | 24.958 |
| 8/31/2010 09:49:01 | 24.674 | 9/1/2010 07:29:01 | 24.958 |
| 8/31/2010 10:09:01 | 24.674 | 9/1/2010 07:49:01 | 24.958 |
| 8/31/2010 10:29:01 | 24.611 | 9/1/2010 08:09:01 | 24.895 |
| 8/31/2010 10:49:01 | 24.611 | 9/1/2010 08:29:01 | 24.895 |
| 8/31/2010 11:09:01 | 24.611 | 9/1/2010 08:49:01 | 24.895 |
| 8/31/2010 11:29:01 | 24.611 | 9/1/2010 09:09:01 | 24.895 |
| 8/31/2010 11:49:01 | 24.549 | 9/1/2010 09:29:01 | 24.895 |
| 8/31/2010 12:09:01 | 24.549 | 9/1/2010 09:49:01 | 24.895 |
| 8/31/2010 12:29:01 | 24.549 | 9/1/2010 10:09:01 | 24.833 |
| 8/31/2010 12:49:01 | 24.549 | 9/1/2010 10:29:01 | 24.833 |
| 8/31/2010 13:09:01 | 24.549 | 9/1/2010 10:49:01 | 24.833 |
| 8/31/2010 13:29:01 | 24.549 | 9/1/2010 11:09:01 | 24.833 |
| 8/31/2010 13:49:01 | 24.549 | 9/1/2010 11:29:01 | 24.833 |
| 8/31/2010 14:09:01 | 24.549 | 9/1/2010 11:49:01 | 24.833 |
| 8/31/2010 14:29:01 | 24.611 | 9/1/2010 12:09:01 | 24.833 |
| 8/31/2010 14:49:01 | 24.611 | 9/1/2010 12:29:01 | 24.77  |
| 8/31/2010 15:09:01 | 24.611 | 9/1/2010 12:49:01 | 24.77  |
| 8/31/2010 15:29:01 | 24.674 | 9/1/2010 13:09:01 | 24.77  |
| 8/31/2010 15:49:01 | 24.736 | 9/1/2010 13:29:01 | 24.77  |
| 8/31/2010 16:09:01 | 24.736 | 9/1/2010 13:49:01 | 24.77  |
| 8/31/2010 16:29:01 | 24.799 | 9/1/2010 14:09:01 | 24.77  |
| 8/31/2010 16:49:01 | 24.861 | 9/1/2010 14:29:01 | 24.77  |
| 8/31/2010 17:09:01 | 24.861 | 9/1/2010 14:49:01 | 24.77  |
| 8/31/2010 17:29:01 | 24.924 | 9/1/2010 15:09:01 | 24.708 |
| 8/31/2010 17:49:01 | 24.924 | 9/1/2010 15:29:01 | 24.77  |
| 8/31/2010 18:09:01 | 24.986 | 9/1/2010 15:49:01 | 24.77  |
| 8/31/2010 18:29:01 | 25.049 | 9/1/2010 16:09:01 | 24.77  |
| 8/31/2010 18:49:01 | 25.049 | 9/1/2010 16:29:01 | 24.77  |
| 8/31/2010 19:09:01 | 25.111 | 9/1/2010 16:49:01 | 24.77  |
| 8/31/2010 19:29:01 | 25.111 | 9/1/2010 17:09:01 | 24.77  |
| 8/31/2010 19:49:01 | 25.174 | 9/1/2010 17:29:01 | 24.77  |
| 8/31/2010 20:09:01 | 25.174 | 9/1/2010 17:49:01 | 24.77  |
| 8/31/2010 20:29:01 | 25.236 | 9/1/2010 18:09:01 | 24.77  |
| 8/31/2010 20:49:01 | 25.236 | 9/1/2010 18:29:01 | 24.77  |
| 8/31/2010 21:09:01 | 25.236 | 9/1/2010 18:49:01 | 24.77  |

|                    |        |                   |        |
|--------------------|--------|-------------------|--------|
| 8/31/2010 21:29:01 | 25.236 | 9/1/2010 19:09:01 | 24.833 |
| 8/31/2010 21:49:01 | 25.236 | 9/1/2010 19:29:01 | 24.833 |
| 8/31/2010 22:09:01 | 25.299 | 9/1/2010 19:49:01 | 24.833 |
| 8/31/2010 22:29:01 | 25.299 | 9/1/2010 20:09:01 | 24.833 |
| 8/31/2010 22:49:01 | 25.299 | 9/1/2010 20:29:01 | 24.895 |
| 8/31/2010 23:09:01 | 25.299 | 9/1/2010 20:49:01 | 24.895 |
| 8/31/2010 23:29:01 | 25.299 | 9/1/2010 21:09:01 | 24.895 |
| 8/31/2010 23:49:01 | 25.299 | 9/1/2010 21:29:01 | 24.895 |
| 9/1/2010 00:09:01  | 25.236 | 9/1/2010 21:49:01 | 24.958 |
| 9/1/2010 00:29:01  | 25.236 | 9/1/2010 22:09:01 | 24.958 |
| 9/1/2010 00:49:01  | 25.236 | 9/1/2010 22:29:01 | 24.958 |
| 9/1/2010 01:09:01  | 25.236 | 9/1/2010 22:49:01 | 24.958 |
| 9/1/2010 01:29:01  | 25.236 | 9/1/2010 23:09:01 | 25.02  |
| 9/1/2010 01:49:01  | 25.236 | 9/1/2010 23:29:01 | 25.02  |
| 9/1/2010 02:09:01  | 25.174 | 9/1/2010 23:49:01 | 25.02  |
| 9/1/2010 02:29:01  | 25.174 | 9/2/2010 00:09:01 | 25.02  |
| 9/1/2010 02:49:01  | 25.174 | 9/2/2010 00:29:01 | 25.082 |
| 9/1/2010 03:09:01  | 25.174 | 9/2/2010 00:49:01 | 25.082 |
| 9/1/2010 03:29:01  | 25.111 | 9/2/2010 01:09:01 | 25.082 |
| 9/1/2010 03:49:01  | 25.111 | 9/2/2010 01:29:01 | 25.082 |
| 9/1/2010 04:09:01  | 25.111 | 9/2/2010 01:49:01 | 25.082 |
| 9/1/2010 04:29:01  | 25.049 | 9/2/2010 02:09:01 | 25.082 |
| 9/1/2010 04:49:01  | 25.049 | 9/2/2010 02:29:01 | 25.082 |
| 9/1/2010 05:09:01  | 25.049 | 9/2/2010 02:49:01 | 25.082 |
| 9/1/2010 05:29:01  | 24.986 | 9/2/2010 03:09:01 | 25.145 |
| 9/1/2010 05:49:01  | 24.986 | 9/2/2010 03:29:01 | 25.145 |
| 9/1/2010 06:09:01  | 24.986 | 9/2/2010 03:49:01 | 25.145 |
| 9/1/2010 06:29:01  | 24.986 | 9/2/2010 04:09:01 | 25.145 |
| 9/1/2010 06:49:01  | 24.924 | 9/2/2010 04:29:01 | 25.145 |
| 9/1/2010 07:09:01  | 24.924 | 9/2/2010 04:49:01 | 25.145 |
| 9/1/2010 07:29:01  | 24.924 | 9/2/2010 05:09:01 | 25.145 |
| 9/1/2010 07:49:01  | 24.861 | 9/2/2010 05:29:01 | 25.145 |
| 9/1/2010 08:09:01  | 24.861 | 9/2/2010 05:49:01 | 25.145 |
| 9/1/2010 08:29:01  | 24.861 | 9/2/2010 06:09:01 | 25.145 |
| 9/1/2010 08:49:01  | 24.799 | 9/2/2010 06:29:01 | 25.145 |
| 9/1/2010 09:09:01  | 24.799 | 9/2/2010 06:49:01 | 25.145 |
| 9/1/2010 09:29:01  | 24.799 | 9/2/2010 07:09:01 | 25.145 |
| 9/1/2010 09:49:01  | 24.799 | 9/2/2010 07:29:01 | 25.082 |
| 9/1/2010 10:09:01  | 24.736 | 9/2/2010 07:49:01 | 25.082 |
| 9/1/2010 10:29:01  | 24.736 | 9/2/2010 08:09:01 | 25.082 |
| 9/1/2010 10:49:01  | 24.736 | 9/2/2010 08:29:01 | 25.082 |
| 9/1/2010 11:09:01  | 24.736 | 9/2/2010 08:49:01 | 25.082 |
| 9/1/2010 11:29:01  | 24.674 | 9/2/2010 09:09:01 | 25.082 |
| 9/1/2010 11:49:01  | 24.674 | 9/2/2010 09:29:01 | 25.082 |
| 9/1/2010 12:09:01  | 24.674 | 9/2/2010 09:49:01 | 25.082 |
| 9/1/2010 12:29:01  | 24.674 | 9/2/2010 10:09:01 | 25.082 |
| 9/1/2010 12:49:01  | 24.674 | 9/2/2010 10:29:01 | 25.02  |
| 9/1/2010 13:09:01  | 24.674 | 9/2/2010 10:49:01 | 25.02  |
| 9/1/2010 13:29:01  | 24.674 | 9/2/2010 11:09:01 | 25.02  |
| 9/1/2010 13:49:01  | 24.674 | 9/2/2010 11:29:01 | 25.02  |

|                   |        |                   |        |
|-------------------|--------|-------------------|--------|
| 9/1/2010 14:09:01 | 24.736 | 9/2/2010 11:49:01 | 25.02  |
| 9/1/2010 14:29:01 | 24.736 | 9/2/2010 12:09:01 | 24.958 |
| 9/1/2010 14:49:01 | 24.736 | 9/2/2010 12:29:01 | 24.958 |
| 9/1/2010 15:09:01 | 24.799 | 9/2/2010 12:49:01 | 24.958 |
| 9/1/2010 15:29:01 | 24.799 | 9/2/2010 13:09:01 | 24.958 |
| 9/1/2010 15:49:01 | 24.861 | 9/2/2010 13:29:01 | 24.958 |
| 9/1/2010 16:09:01 | 24.924 | 9/2/2010 13:49:01 | 24.958 |
| 9/1/2010 16:29:01 | 24.924 | 9/2/2010 14:09:01 | 24.958 |
| 9/1/2010 16:49:01 | 24.986 | 9/2/2010 14:29:01 | 24.895 |
| 9/1/2010 17:09:01 | 25.049 | 9/2/2010 14:49:01 | 24.895 |
| 9/1/2010 17:29:01 | 25.111 | 9/2/2010 15:09:01 | 24.895 |
| 9/1/2010 17:49:01 | 25.111 | 9/2/2010 15:29:01 | 24.895 |
| 9/1/2010 18:09:01 | 25.174 | 9/2/2010 15:49:01 | 24.895 |
| 9/1/2010 18:29:01 | 25.236 | 9/2/2010 16:09:01 | 24.895 |
| 9/1/2010 18:49:01 | 25.236 | 9/2/2010 16:29:01 | 24.895 |
| 9/1/2010 19:09:01 | 25.299 | 9/2/2010 16:49:01 | 24.895 |
| 9/1/2010 19:29:01 | 25.361 | 9/2/2010 17:09:01 | 24.895 |
| 9/1/2010 19:49:01 | 25.361 | 9/2/2010 17:29:01 | 24.895 |
| 9/1/2010 20:09:01 | 25.361 | 9/2/2010 17:49:01 | 24.895 |
| 9/1/2010 20:29:01 | 25.424 | 9/2/2010 18:09:01 | 24.958 |
| 9/1/2010 20:49:01 | 25.424 | 9/2/2010 18:29:01 | 24.958 |
| 9/1/2010 21:09:01 | 25.486 | 9/2/2010 18:49:01 | 24.958 |
| 9/1/2010 21:29:01 | 25.486 | 9/2/2010 19:09:01 | 24.958 |
| 9/1/2010 21:49:01 | 25.486 | 9/2/2010 19:29:01 | 24.958 |
| 9/1/2010 22:09:01 | 25.486 | 9/2/2010 19:49:01 | 24.958 |
| 9/1/2010 22:29:01 | 25.486 | 9/2/2010 20:09:01 | 25.02  |
| 9/1/2010 22:49:01 | 25.486 | 9/2/2010 20:29:01 | 25.02  |
| 9/1/2010 23:09:01 | 25.549 | 9/2/2010 20:49:01 | 25.02  |
| 9/1/2010 23:29:01 | 25.549 | 9/2/2010 21:09:01 | 25.02  |
| 9/1/2010 23:49:01 | 25.549 | 9/2/2010 21:29:01 | 25.082 |
| 9/2/2010 00:09:01 | 25.486 | 9/2/2010 21:49:01 | 25.082 |
| 9/2/2010 00:29:01 | 25.486 | 9/2/2010 22:09:01 | 25.082 |
| 9/2/2010 00:49:01 | 25.486 | 9/2/2010 22:29:01 | 25.145 |
| 9/2/2010 01:09:01 | 25.486 | 9/2/2010 22:49:01 | 25.145 |
| 9/2/2010 01:29:01 | 25.486 | 9/2/2010 23:09:01 | 25.145 |
| 9/2/2010 01:49:01 | 25.486 | 9/2/2010 23:29:01 | 25.145 |
| 9/2/2010 02:09:01 | 25.486 | 9/2/2010 23:49:01 | 25.145 |
| 9/2/2010 02:29:01 | 25.486 | 9/3/2010 00:09:01 | 25.207 |
| 9/2/2010 02:49:01 | 25.424 | 9/3/2010 00:29:01 | 25.207 |
| 9/2/2010 03:09:01 | 25.424 | 9/3/2010 00:49:01 | 25.207 |
| 9/2/2010 03:29:01 | 25.424 | 9/3/2010 01:09:01 | 25.207 |
| 9/2/2010 03:49:01 | 25.424 | 9/3/2010 01:29:01 | 25.207 |
| 9/2/2010 04:09:01 | 25.424 | 9/3/2010 01:49:01 | 25.207 |
| 9/2/2010 04:29:01 | 25.361 | 9/3/2010 02:09:01 | 25.207 |
| 9/2/2010 04:49:01 | 25.361 | 9/3/2010 02:29:01 | 25.207 |
| 9/2/2010 05:09:01 | 25.361 | 9/3/2010 02:49:01 | 25.27  |
| 9/2/2010 05:29:01 | 25.361 | 9/3/2010 03:09:01 | 25.27  |
| 9/2/2010 05:49:01 | 25.299 | 9/3/2010 03:29:01 | 25.27  |
| 9/2/2010 06:09:01 | 25.299 | 9/3/2010 03:49:01 | 25.27  |
| 9/2/2010 06:29:01 | 25.236 | 9/3/2010 04:09:01 | 25.27  |

|                   |        |                   |        |
|-------------------|--------|-------------------|--------|
| 9/2/2010 06:49:01 | 25.236 | 9/3/2010 04:29:01 | 25.27  |
| 9/2/2010 07:09:01 | 25.236 | 9/3/2010 04:49:01 | 25.27  |
| 9/2/2010 07:29:01 | 25.236 | 9/3/2010 05:09:01 | 25.27  |
| 9/2/2010 07:49:01 | 25.174 | 9/3/2010 05:29:01 | 25.27  |
| 9/2/2010 08:09:01 | 25.174 | 9/3/2010 05:49:01 | 25.27  |
| 9/2/2010 08:29:01 | 25.111 | 9/3/2010 06:09:01 | 25.207 |
| 9/2/2010 08:49:01 | 25.111 | 9/3/2010 06:29:01 | 25.207 |
| 9/2/2010 09:09:01 | 25.111 | 9/3/2010 06:49:01 | 25.207 |
| 9/2/2010 09:29:01 | 25.111 | 9/3/2010 07:09:01 | 25.207 |
| 9/2/2010 09:49:01 | 25.049 | 9/3/2010 07:29:01 | 25.207 |
| 9/2/2010 10:09:01 | 25.049 | 9/3/2010 07:49:01 | 25.207 |
| 9/2/2010 10:29:01 | 24.986 | 9/3/2010 08:09:01 | 25.207 |
| 9/2/2010 10:49:01 | 24.986 | 9/3/2010 08:29:01 | 25.207 |
| 9/2/2010 11:09:01 | 24.986 | 9/3/2010 08:49:01 | 25.145 |
| 9/2/2010 11:29:01 | 24.986 | 9/3/2010 09:09:01 | 25.145 |
| 9/2/2010 11:49:01 | 24.924 | 9/3/2010 09:29:01 | 25.145 |
| 9/2/2010 12:09:01 | 24.924 | 9/3/2010 09:49:01 | 25.145 |
| 9/2/2010 12:29:01 | 24.924 | 9/3/2010 10:09:01 | 25.145 |
| 9/2/2010 12:49:01 | 24.924 | 9/3/2010 10:29:01 | 25.082 |
| 9/2/2010 13:09:01 | 24.924 | 9/3/2010 10:49:01 | 25.082 |
| 9/2/2010 13:29:01 | 24.924 | 9/3/2010 11:09:01 | 25.082 |
| 9/2/2010 13:49:01 | 24.924 | 9/3/2010 11:29:01 | 25.082 |
| 9/2/2010 14:09:01 | 24.924 | 9/3/2010 11:49:01 | 25.02  |
| 9/2/2010 14:29:01 | 24.986 | 9/3/2010 12:09:01 | 25.02  |
| 9/2/2010 14:49:01 | 24.986 | 9/3/2010 12:29:01 | 25.02  |
| 9/2/2010 15:09:01 | 25.049 | 9/3/2010 12:49:01 | 25.02  |
| 9/2/2010 15:29:01 | 25.049 | 9/3/2010 13:09:01 | 24.958 |
| 9/2/2010 15:49:01 | 25.111 | 9/3/2010 13:29:01 | 24.958 |
| 9/2/2010 16:09:01 | 25.111 | 9/3/2010 13:49:01 | 24.958 |
| 9/2/2010 16:29:01 | 25.174 | 9/3/2010 14:09:01 | 24.958 |
| 9/2/2010 16:49:01 | 25.236 | 9/3/2010 14:29:01 | 24.958 |
| 9/2/2010 17:09:01 | 25.236 | 9/3/2010 14:49:01 | 24.895 |
| 9/2/2010 17:29:01 | 25.299 | 9/3/2010 15:09:01 | 24.895 |
| 9/2/2010 17:49:01 | 25.361 | 9/3/2010 15:29:01 | 24.895 |
| 9/2/2010 18:09:01 | 25.424 | 9/3/2010 15:49:01 | 24.895 |
| 9/2/2010 18:29:01 | 25.424 | 9/3/2010 16:09:01 | 24.895 |
| 9/2/2010 18:49:01 | 25.486 | 9/3/2010 16:29:01 | 24.895 |
| 9/2/2010 19:09:01 | 25.486 | 9/3/2010 16:49:01 | 24.895 |
| 9/2/2010 19:29:01 | 25.549 | 9/3/2010 17:09:01 | 24.895 |
| 9/2/2010 19:49:01 | 25.611 | 9/3/2010 17:29:01 | 24.895 |
| 9/2/2010 20:09:01 | 25.611 | 9/3/2010 17:49:01 | 24.895 |
| 9/2/2010 20:29:01 | 25.611 | 9/3/2010 18:09:01 | 24.895 |
| 9/2/2010 20:49:01 | 25.674 | 9/3/2010 18:29:01 | 24.895 |
| 9/2/2010 21:09:01 | 25.674 | 9/3/2010 18:49:01 | 24.895 |
| 9/2/2010 21:29:01 | 25.674 | 9/3/2010 19:09:01 | 24.895 |
| 9/2/2010 21:49:01 | 25.674 | 9/3/2010 19:29:01 | 24.958 |
| 9/2/2010 22:09:01 | 25.674 | 9/3/2010 19:49:01 | 24.958 |
| 9/2/2010 22:29:01 | 25.674 | 9/3/2010 20:09:01 | 24.958 |
| 9/2/2010 22:49:01 | 25.736 | 9/3/2010 20:29:01 | 24.958 |
| 9/2/2010 23:09:01 | 25.674 | 9/3/2010 20:49:01 | 24.958 |

|                   |        |                   |        |
|-------------------|--------|-------------------|--------|
| 9/2/2010 23:29:01 | 25.674 | 9/3/2010 21:09:01 | 25.02  |
| 9/2/2010 23:49:01 | 25.674 | 9/3/2010 21:29:01 | 25.02  |
| 9/3/2010 00:09:01 | 25.674 | 9/3/2010 21:49:01 | 25.02  |
| 9/3/2010 00:29:01 | 25.674 | 9/3/2010 22:09:01 | 25.02  |
| 9/3/2010 00:49:01 | 25.674 | 9/3/2010 22:29:01 | 25.02  |
| 9/3/2010 01:09:01 | 25.674 | 9/3/2010 22:49:01 | 25.082 |
| 9/3/2010 01:29:01 | 25.611 | 9/3/2010 23:09:01 | 25.082 |
| 9/3/2010 01:49:01 | 25.611 | 9/3/2010 23:29:01 | 25.082 |
| 9/3/2010 02:09:01 | 25.611 | 9/3/2010 23:49:01 | 25.082 |
| 9/3/2010 02:29:01 | 25.611 | 9/4/2010 00:09:01 | 25.082 |
| 9/3/2010 02:49:01 | 25.611 | 9/4/2010 00:29:01 | 25.082 |
| 9/3/2010 03:09:01 | 25.549 | 9/4/2010 00:49:01 | 25.145 |
| 9/3/2010 03:29:01 | 25.549 | 9/4/2010 01:09:01 | 25.145 |
| 9/3/2010 03:49:01 | 25.549 | 9/4/2010 01:29:01 | 25.145 |
| 9/3/2010 04:09:01 | 25.486 | 9/4/2010 01:49:01 | 25.145 |
| 9/3/2010 04:29:01 | 25.486 | 9/4/2010 02:09:01 | 25.145 |
| 9/3/2010 04:49:01 | 25.486 | 9/4/2010 02:29:01 | 25.145 |
| 9/3/2010 05:09:01 | 25.424 | 9/4/2010 02:49:01 | 25.145 |
| 9/3/2010 05:29:01 | 25.424 | 9/4/2010 03:09:01 | 25.145 |
| 9/3/2010 05:49:01 | 25.361 | 9/4/2010 03:29:01 | 25.145 |
| 9/3/2010 06:09:01 | 25.361 | 9/4/2010 03:49:01 | 25.145 |
| 9/3/2010 06:29:01 | 25.361 | 9/4/2010 04:09:01 | 25.145 |
| 9/3/2010 06:49:01 | 25.299 | 9/4/2010 04:29:01 | 25.145 |
| 9/3/2010 07:09:01 | 25.299 | 9/4/2010 04:49:01 | 25.145 |
| 9/3/2010 07:29:01 | 25.236 | 9/4/2010 05:09:01 | 25.145 |
| 9/3/2010 07:49:01 | 25.236 | 9/4/2010 05:29:01 | 25.145 |
| 9/3/2010 08:09:01 | 25.174 | 9/4/2010 05:49:01 | 25.145 |
| 9/3/2010 08:29:01 | 25.174 | 9/4/2010 06:09:01 | 25.145 |
| 9/3/2010 08:49:01 | 25.111 | 9/4/2010 06:29:01 | 25.145 |
| 9/3/2010 09:09:01 | 25.111 | 9/4/2010 06:49:01 | 25.145 |
| 9/3/2010 09:29:01 | 25.049 | 9/4/2010 07:09:01 | 25.082 |
| 9/3/2010 09:49:01 | 25.049 | 9/4/2010 07:29:01 | 25.082 |
| 9/3/2010 10:09:01 | 25.049 | 9/4/2010 07:49:01 | 25.082 |
| 9/3/2010 10:29:01 | 24.986 | 9/4/2010 08:09:01 | 25.082 |
| 9/3/2010 10:49:01 | 24.986 | 9/4/2010 08:29:01 | 25.082 |
| 9/3/2010 11:09:01 | 24.924 | 9/4/2010 08:49:01 | 25.082 |
| 9/3/2010 11:29:01 | 24.924 | 9/4/2010 09:09:01 | 25.02  |
| 9/3/2010 11:49:01 | 24.924 | 9/4/2010 09:29:01 | 25.02  |
| 9/3/2010 12:09:01 | 24.861 | 9/4/2010 09:49:01 | 25.02  |
| 9/3/2010 12:29:01 | 24.861 | 9/4/2010 10:09:01 | 25.02  |
| 9/3/2010 12:49:01 | 24.861 | 9/4/2010 10:29:01 | 25.02  |
| 9/3/2010 13:09:01 | 24.861 | 9/4/2010 10:49:01 | 25.02  |
| 9/3/2010 13:29:01 | 24.861 | 9/4/2010 11:09:01 | 24.958 |
| 9/3/2010 13:49:01 | 24.861 | 9/4/2010 11:29:01 | 24.958 |
| 9/3/2010 14:09:01 | 24.861 | 9/4/2010 11:49:01 | 24.958 |
| 9/3/2010 14:29:01 | 24.861 | 9/4/2010 12:09:01 | 24.958 |
| 9/3/2010 14:49:01 | 24.924 | 9/4/2010 12:29:01 | 24.895 |
| 9/3/2010 15:09:01 | 24.924 | 9/4/2010 12:49:01 | 24.895 |
| 9/3/2010 15:29:01 | 24.924 | 9/4/2010 13:09:01 | 24.895 |
| 9/3/2010 15:49:01 | 24.986 | 9/4/2010 13:29:01 | 24.895 |

|                   |        |                   |        |
|-------------------|--------|-------------------|--------|
| 9/3/2010 16:09:01 | 25.049 | 9/4/2010 13:49:01 | 24.895 |
| 9/3/2010 16:29:01 | 25.049 | 9/4/2010 14:09:01 | 24.833 |
| 9/3/2010 16:49:01 | 25.111 | 9/4/2010 14:29:01 | 24.833 |
| 9/3/2010 17:09:01 | 25.111 | 9/4/2010 14:49:01 | 24.833 |
| 9/3/2010 17:29:01 | 25.174 | 9/4/2010 15:09:01 | 24.833 |
| 9/3/2010 17:49:01 | 25.236 | 9/4/2010 15:29:01 | 24.833 |
| 9/3/2010 18:09:01 | 25.236 | 9/4/2010 15:49:01 | 24.833 |
| 9/3/2010 18:29:01 | 25.299 | 9/4/2010 16:09:01 | 24.833 |
| 9/3/2010 18:49:01 | 25.361 | 9/4/2010 16:29:01 | 24.833 |
| 9/3/2010 19:09:01 | 25.361 | 9/4/2010 16:49:01 | 24.833 |
| 9/3/2010 19:29:01 | 25.424 | 9/4/2010 17:09:01 | 24.833 |
| 9/3/2010 19:49:01 | 25.424 | 9/4/2010 17:29:01 | 24.833 |
| 9/3/2010 20:09:01 | 25.486 | 9/4/2010 17:49:01 | 24.833 |
| 9/3/2010 20:29:01 | 25.486 | 9/4/2010 18:09:01 | 24.833 |
| 9/3/2010 20:49:01 | 25.549 | 9/4/2010 18:29:01 | 24.833 |
| 9/3/2010 21:09:01 | 25.549 | 9/4/2010 18:49:01 | 24.833 |
| 9/3/2010 21:29:01 | 25.549 | 9/4/2010 19:09:01 | 24.895 |
| 9/3/2010 21:49:01 | 25.549 | 9/4/2010 19:29:01 | 24.895 |
| 9/3/2010 22:09:01 | 25.549 | 9/4/2010 19:49:01 | 24.895 |
| 9/3/2010 22:29:01 | 25.549 | 9/4/2010 20:09:01 | 24.895 |
| 9/3/2010 22:49:01 | 25.549 | 9/4/2010 20:29:01 | 24.895 |
| 9/3/2010 23:09:01 | 25.549 | 9/4/2010 20:49:01 | 24.958 |
| 9/3/2010 23:29:01 | 25.549 | 9/4/2010 21:09:01 | 24.958 |
| 9/3/2010 23:49:01 | 25.549 | 9/4/2010 21:29:01 | 24.958 |
| 9/4/2010 00:09:01 | 25.549 | 9/4/2010 21:49:01 | 24.958 |
| 9/4/2010 00:29:01 | 25.549 | 9/4/2010 22:09:01 | 25.02  |
| 9/4/2010 00:49:01 | 25.549 | 9/4/2010 22:29:01 | 25.02  |
| 9/4/2010 01:09:01 | 25.486 | 9/4/2010 22:49:01 | 25.02  |
| 9/4/2010 01:29:01 | 25.486 | 9/4/2010 23:09:01 | 25.02  |
| 9/4/2010 01:49:01 | 25.486 | 9/4/2010 23:29:01 | 25.082 |
| 9/4/2010 02:09:01 | 25.486 | 9/4/2010 23:49:01 | 25.082 |
| 9/4/2010 02:29:01 | 25.424 | 9/5/2010 00:09:01 | 25.082 |
| 9/4/2010 02:49:01 | 25.424 | 9/5/2010 00:29:01 | 25.082 |
| 9/4/2010 03:09:01 | 25.424 | 9/5/2010 00:49:01 | 25.145 |
| 9/4/2010 03:29:01 | 25.361 | 9/5/2010 01:09:01 | 25.145 |
| 9/4/2010 03:49:01 | 25.361 | 9/5/2010 01:29:01 | 25.145 |
| 9/4/2010 04:09:01 | 25.361 | 9/5/2010 01:49:01 | 25.145 |
| 9/4/2010 04:29:01 | 25.299 | 9/5/2010 02:09:01 | 25.145 |
| 9/4/2010 04:49:01 | 25.299 | 9/5/2010 02:29:01 | 25.145 |
| 9/4/2010 05:09:01 | 25.299 | 9/5/2010 02:49:01 | 25.145 |
| 9/4/2010 05:29:01 | 25.236 | 9/5/2010 03:09:01 | 25.145 |
| 9/4/2010 05:49:01 | 25.236 | 9/5/2010 03:29:01 | 25.145 |
| 9/4/2010 06:09:01 | 25.174 | 9/5/2010 03:49:01 | 25.207 |
| 9/4/2010 06:29:01 | 25.174 | 9/5/2010 04:09:01 | 25.207 |
| 9/4/2010 06:49:01 | 25.174 | 9/5/2010 04:29:01 | 25.207 |
| 9/4/2010 07:09:01 | 25.111 | 9/5/2010 04:49:01 | 25.207 |
| 9/4/2010 07:29:01 | 25.111 | 9/5/2010 05:09:01 | 25.207 |
| 9/4/2010 07:49:01 | 25.111 | 9/5/2010 05:29:01 | 25.207 |
| 9/4/2010 08:09:01 | 25.049 | 9/5/2010 05:49:01 | 25.207 |
| 9/4/2010 08:29:01 | 25.049 | 9/5/2010 06:09:01 | 25.207 |

|                   |        |                   |        |
|-------------------|--------|-------------------|--------|
| 9/4/2010 08:49:01 | 24.986 | 9/5/2010 06:29:01 | 25.145 |
| 9/4/2010 09:09:01 | 24.986 | 9/5/2010 06:49:01 | 25.207 |
| 9/4/2010 09:29:01 | 24.924 | 9/5/2010 07:09:01 | 25.145 |
| 9/4/2010 09:49:01 | 24.924 | 9/5/2010 07:29:01 | 25.145 |
| 9/4/2010 10:09:01 | 24.924 | 9/5/2010 07:49:01 | 25.145 |
| 9/4/2010 10:29:01 | 24.861 | 9/5/2010 08:09:01 | 25.145 |
| 9/4/2010 10:49:01 | 24.861 | 9/5/2010 08:29:01 | 25.145 |
| 9/4/2010 11:09:01 | 24.799 | 9/5/2010 08:49:01 | 25.145 |
| 9/4/2010 11:29:01 | 24.799 | 9/5/2010 09:09:01 | 25.145 |
| 9/4/2010 11:49:01 | 24.799 | 9/5/2010 09:29:01 | 25.145 |
| 9/4/2010 12:09:01 | 24.799 | 9/5/2010 09:49:01 | 25.082 |
| 9/4/2010 12:29:01 | 24.799 | 9/5/2010 10:09:01 | 25.082 |
| 9/4/2010 12:49:01 | 24.736 | 9/5/2010 10:29:01 | 25.082 |
| 9/4/2010 13:09:01 | 24.736 | 9/5/2010 10:49:01 | 25.082 |
| 9/4/2010 13:29:01 | 24.736 | 9/5/2010 11:09:01 | 25.082 |
| 9/4/2010 13:49:01 | 24.799 | 9/5/2010 11:29:01 | 25.082 |
| 9/4/2010 14:09:01 | 24.799 | 9/5/2010 11:49:01 | 25.082 |
| 9/4/2010 14:29:01 | 24.799 | 9/5/2010 12:09:01 | 25.082 |
| 9/4/2010 14:49:01 | 24.799 | 9/5/2010 12:29:01 | 25.02  |
| 9/4/2010 15:09:01 | 24.861 | 9/5/2010 12:49:01 | 25.02  |
| 9/4/2010 15:29:01 | 24.861 | 9/5/2010 13:09:01 | 25.02  |
| 9/4/2010 15:49:01 | 24.924 | 9/5/2010 13:29:01 | 25.02  |
| 9/4/2010 16:09:01 | 24.986 | 9/5/2010 13:49:01 | 25.02  |
| 9/4/2010 16:29:01 | 24.986 | 9/5/2010 14:09:01 | 25.02  |
| 9/4/2010 16:49:01 | 25.049 | 9/5/2010 14:29:01 | 25.02  |
| 9/4/2010 17:09:01 | 25.111 | 9/5/2010 14:49:01 | 25.02  |
| 9/4/2010 17:29:01 | 25.111 | 9/5/2010 15:09:01 | 24.958 |
| 9/4/2010 17:49:01 | 25.174 | 9/5/2010 15:29:01 | 25.02  |
| 9/4/2010 18:09:01 | 25.236 | 9/5/2010 15:49:01 | 25.02  |
| 9/4/2010 18:29:01 | 25.299 | 9/5/2010 16:09:01 | 25.02  |
| 9/4/2010 18:49:01 | 25.299 | 9/5/2010 16:29:01 | 24.958 |
| 9/4/2010 19:09:01 | 25.361 | 9/5/2010 16:49:01 | 25.02  |
| 9/4/2010 19:29:01 | 25.361 | 9/5/2010 17:09:01 | 25.02  |
| 9/4/2010 19:49:01 | 25.424 | 9/5/2010 17:29:01 | 25.02  |
| 9/4/2010 20:09:01 | 25.424 | 9/5/2010 17:49:01 | 25.02  |
| 9/4/2010 20:29:01 | 25.486 | 9/5/2010 18:09:01 | 25.02  |
| 9/4/2010 20:49:01 | 25.486 | 9/5/2010 18:29:01 | 25.02  |
| 9/4/2010 21:09:01 | 25.486 | 9/5/2010 18:49:01 | 25.02  |
| 9/4/2010 21:29:01 | 25.549 | 9/5/2010 19:09:01 | 25.02  |
| 9/4/2010 21:49:01 | 25.549 | 9/5/2010 19:29:01 | 25.02  |
| 9/4/2010 22:09:01 | 25.549 | 9/5/2010 19:49:01 | 25.082 |
| 9/4/2010 22:29:01 | 25.549 | 9/5/2010 20:09:01 | 25.082 |
| 9/4/2010 22:49:01 | 25.549 | 9/5/2010 20:29:01 | 25.082 |
| 9/4/2010 23:09:01 | 25.611 | 9/5/2010 20:49:01 | 25.082 |
| 9/4/2010 23:29:01 | 25.611 | 9/5/2010 21:09:01 | 25.145 |
| 9/4/2010 23:49:01 | 25.611 | 9/5/2010 21:29:01 | 25.145 |
| 9/5/2010 00:09:01 | 25.611 | 9/5/2010 21:49:01 | 25.145 |
| 9/5/2010 00:29:01 | 25.611 | 9/5/2010 22:09:01 | 25.145 |
| 9/5/2010 00:49:01 | 25.611 | 9/5/2010 22:29:01 | 25.145 |
| 9/5/2010 01:09:01 | 25.549 | 9/5/2010 22:49:01 | 25.207 |



|                   |        |                   |        |
|-------------------|--------|-------------------|--------|
| 9/5/2010 01:29:01 | 25.549 | 9/5/2010 23:09:01 | 25.207 |
| 9/5/2010 01:49:01 | 25.549 | 9/5/2010 23:29:01 | 25.207 |
| 9/5/2010 02:09:01 | 25.549 | 9/5/2010 23:49:01 | 25.207 |
| 9/5/2010 02:29:01 | 25.549 | 9/6/2010 00:09:01 | 25.207 |
| 9/5/2010 02:49:01 | 25.549 | 9/6/2010 00:29:01 | 25.27  |
| 9/5/2010 03:09:01 | 25.486 | 9/6/2010 00:49:01 | 25.27  |
| 9/5/2010 03:29:01 | 25.486 | 9/6/2010 01:09:01 | 25.27  |
| 9/5/2010 03:49:01 | 25.486 | 9/6/2010 01:29:01 | 25.27  |
| 9/5/2010 04:09:01 | 25.486 | 9/6/2010 01:49:01 | 25.27  |
| 9/5/2010 04:29:01 | 25.424 | 9/6/2010 02:09:01 | 25.27  |
| 9/5/2010 04:49:01 | 25.424 | 9/6/2010 02:29:01 | 25.27  |
| 9/5/2010 05:09:01 | 25.424 | 9/6/2010 02:49:01 | 25.27  |
| 9/5/2010 05:29:01 | 25.424 | 9/6/2010 03:09:01 | 25.332 |
| 9/5/2010 05:49:01 | 25.361 | 9/6/2010 03:29:01 | 25.332 |
| 9/5/2010 06:09:01 | 25.361 | 9/6/2010 03:49:01 | 25.332 |
| 9/5/2010 06:29:01 | 25.361 | 9/6/2010 04:09:01 | 25.332 |
| 9/5/2010 06:49:01 | 25.361 | 9/6/2010 04:29:01 | 25.332 |
| 9/5/2010 07:09:01 | 25.299 | 9/6/2010 04:49:01 | 25.332 |
| 9/5/2010 07:29:01 | 25.299 | 9/6/2010 05:09:01 | 25.332 |
| 9/5/2010 07:49:01 | 25.236 | 9/6/2010 05:29:01 | 25.332 |
| 9/5/2010 08:09:01 | 25.236 | 9/6/2010 05:49:01 | 25.332 |
| 9/5/2010 08:29:01 | 25.236 | 9/6/2010 06:09:01 | 25.332 |
| 9/5/2010 08:49:01 | 25.236 | 9/6/2010 06:29:01 | 25.332 |
| 9/5/2010 09:09:01 | 25.174 | 9/6/2010 06:49:01 | 25.332 |
| 9/5/2010 09:29:01 | 25.174 | 9/6/2010 07:09:01 | 25.27  |
| 9/5/2010 09:49:01 | 25.174 | 9/6/2010 07:29:01 | 25.332 |
| 9/5/2010 10:09:01 | 25.111 | 9/6/2010 07:49:01 | 25.27  |
| 9/5/2010 10:29:01 | 25.111 | 9/6/2010 08:09:01 | 25.27  |
| 9/5/2010 10:49:01 | 25.111 | 9/6/2010 08:29:01 | 25.27  |
| 9/5/2010 11:09:01 | 25.049 | 9/6/2010 08:49:01 | 25.27  |
| 9/5/2010 11:29:01 | 25.049 | 9/6/2010 09:09:01 | 25.27  |
| 9/5/2010 11:49:01 | 25.049 | 9/6/2010 09:29:01 | 25.27  |
| 9/5/2010 12:09:01 | 25.049 | 9/6/2010 09:49:01 | 25.27  |
| 9/5/2010 12:29:01 | 25.049 | 9/6/2010 10:09:01 | 25.27  |
| 9/5/2010 12:49:01 | 25.049 | 9/6/2010 10:29:01 | 25.27  |
| 9/5/2010 13:09:01 | 25.049 | 9/6/2010 10:49:01 | 25.207 |
| 9/5/2010 13:29:01 | 25.049 | 9/6/2010 11:09:01 | 25.207 |
| 9/5/2010 13:49:01 | 25.049 | 9/6/2010 11:29:01 | 25.207 |
| 9/5/2010 14:09:01 | 25.049 | 9/6/2010 11:49:01 | 25.207 |
| 9/5/2010 14:29:01 | 25.111 | 9/6/2010 12:09:01 | 25.207 |
| 9/5/2010 14:49:01 | 25.111 | 9/6/2010 12:29:01 | 25.207 |
| 9/5/2010 15:09:01 | 25.111 | 9/6/2010 12:49:01 | 25.145 |
| 9/5/2010 15:29:01 | 25.111 | 9/6/2010 13:09:01 | 25.145 |
| 9/5/2010 15:49:01 | 25.174 | 9/6/2010 13:29:01 | 25.145 |
| 9/5/2010 16:09:01 | 25.174 | 9/6/2010 13:49:01 | 25.145 |
| 9/5/2010 16:29:01 | 25.236 | 9/6/2010 14:09:01 | 25.145 |
| 9/5/2010 16:49:01 | 25.236 | 9/6/2010 14:29:01 | 25.145 |
| 9/5/2010 17:09:01 | 25.299 | 9/6/2010 14:49:01 | 25.145 |
| 9/5/2010 17:29:01 | 25.299 | 9/6/2010 15:09:01 | 25.145 |
| 9/5/2010 17:49:01 | 25.361 | 9/6/2010 15:29:01 | 25.145 |

|                   |        |                   |        |
|-------------------|--------|-------------------|--------|
| 9/5/2010 18:09:01 | 25.424 | 9/6/2010 15:49:01 | 25.145 |
| 9/5/2010 18:29:01 | 25.424 | 9/6/2010 16:09:01 | 25.145 |
| 9/5/2010 18:49:01 | 25.424 | 9/6/2010 16:29:01 | 25.145 |
| 9/5/2010 19:09:01 | 25.486 | 9/6/2010 16:49:01 | 25.145 |
| 9/5/2010 19:29:01 | 25.486 | 9/6/2010 17:09:01 | 25.145 |
| 9/5/2010 19:49:01 | 25.549 | 9/6/2010 17:29:01 | 25.145 |
| 9/5/2010 20:09:01 | 25.549 | 9/6/2010 17:49:01 | 25.207 |
| 9/5/2010 20:29:01 | 25.611 | 9/6/2010 18:09:01 | 25.207 |
| 9/5/2010 20:49:01 | 25.611 | 9/6/2010 18:29:01 | 25.207 |
| 9/5/2010 21:09:01 | 25.611 | 9/6/2010 18:49:01 | 25.207 |
| 9/5/2010 21:29:01 | 25.611 | 9/6/2010 19:09:01 | 25.207 |
| 9/5/2010 21:49:01 | 25.674 | 9/6/2010 19:29:01 | 25.27  |
| 9/5/2010 22:09:01 | 25.674 | 9/6/2010 19:49:01 | 25.27  |
| 9/5/2010 22:29:01 | 25.674 | 9/6/2010 20:09:01 | 25.27  |
| 9/5/2010 22:49:01 | 25.674 | 9/6/2010 20:29:01 | 25.27  |
| 9/5/2010 23:09:01 | 25.674 | 9/6/2010 20:49:01 | 25.332 |
| 9/5/2010 23:29:01 | 25.674 | 9/6/2010 21:09:01 | 25.332 |
| 9/5/2010 23:49:01 | 25.674 | 9/6/2010 21:29:01 | 25.332 |
| 9/6/2010 00:09:01 | 25.674 | 9/6/2010 21:49:01 | 25.332 |
| 9/6/2010 00:29:01 | 25.674 | 9/6/2010 22:09:01 | 25.332 |
| 9/6/2010 00:49:01 | 25.674 | 9/6/2010 22:29:01 | 25.395 |
| 9/6/2010 01:09:01 | 25.674 | 9/6/2010 22:49:01 | 25.395 |
| 9/6/2010 01:29:01 | 25.674 | 9/6/2010 23:09:01 | 25.395 |
| 9/6/2010 01:49:01 | 25.674 | 9/6/2010 23:29:01 | 25.395 |
| 9/6/2010 02:09:01 | 25.674 | 9/6/2010 23:49:01 | 25.457 |
| 9/6/2010 02:29:01 | 25.674 | 9/7/2010 00:09:01 | 25.457 |
| 9/6/2010 02:49:01 | 25.674 | 9/7/2010 00:29:01 | 25.457 |
| 9/6/2010 03:09:01 | 25.674 | 9/7/2010 00:49:01 | 25.457 |
| 9/6/2010 03:29:01 | 25.611 | 9/7/2010 01:09:01 | 25.457 |
| 9/6/2010 03:49:01 | 25.611 | 9/7/2010 01:29:01 | 25.457 |
| 9/6/2010 04:09:01 | 25.611 | 9/7/2010 01:49:01 | 25.457 |
| 9/6/2010 04:29:01 | 25.611 | 9/7/2010 02:09:01 | 25.457 |
| 9/6/2010 04:49:01 | 25.611 | 9/7/2010 02:29:01 | 25.457 |
| 9/6/2010 05:09:01 | 25.549 | 9/7/2010 02:49:01 | 25.457 |
| 9/6/2010 05:29:01 | 25.549 | 9/7/2010 03:09:01 | 25.457 |
| 9/6/2010 05:49:01 | 25.549 | 9/7/2010 03:29:01 | 25.52  |
| 9/6/2010 06:09:01 | 25.549 | 9/7/2010 03:49:01 | 25.457 |
| 9/6/2010 06:29:01 | 25.486 | 9/7/2010 04:09:01 | 25.52  |
| 9/6/2010 06:49:01 | 25.486 | 9/7/2010 04:29:01 | 25.457 |
| 9/6/2010 07:09:01 | 25.486 | 9/7/2010 04:49:01 | 25.457 |
| 9/6/2010 07:29:01 | 25.486 | 9/7/2010 05:09:01 | 25.457 |
| 9/6/2010 07:49:01 | 25.424 | 9/7/2010 05:29:01 | 25.457 |
| 9/6/2010 08:09:01 | 25.424 | 9/7/2010 05:49:01 | 25.457 |
| 9/6/2010 08:29:01 | 25.424 | 9/7/2010 06:09:01 | 25.457 |
| 9/6/2010 08:49:01 | 25.424 | 9/7/2010 06:29:01 | 25.457 |
| 9/6/2010 09:09:01 | 25.361 | 9/7/2010 06:49:01 | 25.457 |
| 9/6/2010 09:29:01 | 25.361 | 9/7/2010 07:09:01 | 25.457 |
| 9/6/2010 09:49:01 | 25.361 | 9/7/2010 07:29:01 | 25.395 |
| 9/6/2010 10:09:01 | 25.361 | 9/7/2010 07:49:01 | 25.395 |
| 9/6/2010 10:29:01 | 25.299 | 9/7/2010 08:09:01 | 25.395 |

|                   |        |                   |        |
|-------------------|--------|-------------------|--------|
| 9/6/2010 10:49:01 | 25.299 | 9/7/2010 08:29:01 | 25.395 |
| 9/6/2010 11:09:01 | 25.299 | 9/7/2010 08:49:01 | 25.395 |
| 9/6/2010 11:29:01 | 25.299 | 9/7/2010 09:09:01 | 25.332 |
| 9/6/2010 11:49:01 | 25.299 | 9/7/2010 09:29:01 | 25.332 |
| 9/6/2010 12:09:01 | 25.299 | 9/7/2010 09:49:01 | 25.332 |
| 9/6/2010 12:29:01 | 25.236 | 9/7/2010 10:09:01 | 25.332 |
| 9/6/2010 12:49:01 | 25.236 | 9/7/2010 10:29:01 | 25.332 |
| 9/6/2010 13:09:01 | 25.236 | 9/7/2010 10:49:01 | 25.27  |
| 9/6/2010 13:29:01 | 25.299 | 9/7/2010 11:09:01 | 25.27  |
| 9/6/2010 13:49:01 | 25.299 | 9/7/2010 11:29:01 | 25.27  |
| 9/6/2010 14:09:01 | 25.299 | 9/7/2010 11:49:01 | 25.207 |
| 9/6/2010 14:29:01 | 25.299 | 9/7/2010 12:09:01 | 25.207 |
| 9/6/2010 14:49:01 | 25.361 | 9/7/2010 12:29:01 | 25.207 |
| 9/6/2010 15:09:01 | 25.361 | 9/7/2010 12:49:01 | 25.207 |
| 9/6/2010 15:29:01 | 25.424 | 9/7/2010 13:09:01 | 25.145 |
| 9/6/2010 15:49:01 | 25.424 | 9/7/2010 13:29:01 | 25.145 |
| 9/6/2010 16:09:01 | 25.486 | 9/7/2010 13:49:01 | 25.145 |
| 9/6/2010 16:29:01 | 25.486 | 9/7/2010 14:09:01 | 25.145 |
| 9/6/2010 16:49:01 | 25.549 | 9/7/2010 14:29:01 | 25.145 |
| 9/6/2010 17:09:01 | 25.611 | 9/7/2010 14:49:01 | 25.145 |
| 9/6/2010 17:29:01 | 25.611 | 9/7/2010 15:09:01 | 25.082 |
| 9/6/2010 17:49:01 | 25.674 | 9/7/2010 15:29:01 | 25.082 |
| 9/6/2010 18:09:01 | 25.736 | 9/7/2010 15:49:01 | 25.082 |
| 9/6/2010 18:29:01 | 25.736 | 9/7/2010 16:09:01 | 25.082 |
| 9/6/2010 18:49:01 | 25.799 | 9/7/2010 16:29:01 | 25.082 |
| 9/6/2010 19:09:01 | 25.799 | 9/7/2010 16:49:01 | 25.082 |
| 9/6/2010 19:29:01 | 25.861 | 9/7/2010 17:09:01 | 25.082 |
| 9/6/2010 19:49:01 | 25.861 | 9/7/2010 17:29:01 | 25.082 |
| 9/6/2010 20:09:01 | 25.924 | 9/7/2010 17:49:01 | 25.082 |
| 9/6/2010 20:29:01 | 25.924 | 9/7/2010 18:09:01 | 25.082 |
| 9/6/2010 20:49:01 | 25.924 | 9/7/2010 18:29:01 | 25.082 |
| 9/6/2010 21:09:01 | 25.986 | 9/7/2010 18:49:01 | 25.082 |
| 9/6/2010 21:29:01 | 25.986 | 9/7/2010 19:09:01 | 25.145 |
| 9/6/2010 21:49:01 | 25.986 | 9/7/2010 19:29:01 | 25.145 |
| 9/6/2010 22:09:01 | 25.986 | 9/7/2010 19:49:01 | 25.145 |
| 9/6/2010 22:29:01 | 25.986 | 9/7/2010 20:09:01 | 25.145 |
| 9/6/2010 22:49:01 | 25.986 | 9/7/2010 20:29:01 | 25.145 |
| 9/6/2010 23:09:01 | 25.986 | 9/7/2010 20:49:01 | 25.207 |
| 9/6/2010 23:29:01 | 25.986 | 9/7/2010 21:09:01 | 25.207 |
| 9/6/2010 23:49:01 | 25.986 | 9/7/2010 21:29:01 | 25.207 |
| 9/7/2010 00:09:01 | 25.986 | 9/7/2010 21:49:01 | 25.207 |
| 9/7/2010 00:29:01 | 25.986 | 9/7/2010 22:09:01 | 25.27  |
| 9/7/2010 00:49:01 | 25.986 | 9/7/2010 22:29:01 | 25.27  |
| 9/7/2010 01:09:01 | 25.986 | 9/7/2010 22:49:01 | 25.27  |
| 9/7/2010 01:29:01 | 25.924 | 9/7/2010 23:09:01 | 25.27  |
| 9/7/2010 01:49:01 | 25.924 | 9/7/2010 23:29:01 | 25.332 |
| 9/7/2010 02:09:01 | 25.924 | 9/7/2010 23:49:01 | 25.332 |
| 9/7/2010 02:29:01 | 25.924 | 9/8/2010 00:09:01 | 25.332 |
| 9/7/2010 02:49:01 | 25.861 | 9/8/2010 00:29:01 | 25.332 |
| 9/7/2010 03:09:01 | 25.861 | 9/8/2010 00:49:01 | 25.332 |

|                   |        |                   |        |
|-------------------|--------|-------------------|--------|
| 9/7/2010 03:29:01 | 25.861 | 9/8/2010 01:09:01 | 25.332 |
| 9/7/2010 03:49:01 | 25.799 | 9/8/2010 01:29:01 | 25.332 |
| 9/7/2010 04:09:01 | 25.799 | 9/8/2010 01:49:01 | 25.332 |
| 9/7/2010 04:29:01 | 25.799 | 9/8/2010 02:09:01 | 25.332 |
| 9/7/2010 04:49:01 | 25.736 | 9/8/2010 02:29:01 | 25.332 |
| 9/7/2010 05:09:01 | 25.736 | 9/8/2010 02:49:01 | 25.332 |
| 9/7/2010 05:29:01 | 25.674 | 9/8/2010 03:09:01 | 25.332 |
| 9/7/2010 05:49:01 | 25.674 | 9/8/2010 03:29:01 | 25.332 |
| 9/7/2010 06:09:01 | 25.674 | 9/8/2010 03:49:01 | 25.332 |
| 9/7/2010 06:29:01 | 25.611 | 9/8/2010 04:09:01 | 25.332 |
| 9/7/2010 06:49:01 | 25.549 | 9/8/2010 04:29:01 | 25.332 |
| 9/7/2010 07:09:01 | 25.549 | 9/8/2010 04:49:01 | 25.332 |
| 9/7/2010 07:29:01 | 25.549 | 9/8/2010 05:09:01 | 25.332 |
| 9/7/2010 07:49:01 | 25.486 | 9/8/2010 05:29:01 | 25.332 |
| 9/7/2010 08:09:01 | 25.486 | 9/8/2010 05:49:01 | 25.332 |
| 9/7/2010 08:29:01 | 25.424 | 9/8/2010 06:09:01 | 25.332 |
| 9/7/2010 08:49:01 | 25.424 | 9/8/2010 06:29:01 | 25.332 |
| 9/7/2010 09:09:01 | 25.361 | 9/8/2010 06:49:01 | 25.332 |
| 9/7/2010 09:29:01 | 25.361 | 9/8/2010 07:09:01 | 25.332 |
| 9/7/2010 09:49:01 | 25.299 | 9/8/2010 07:29:01 | 25.27  |
| 9/7/2010 10:09:01 | 25.299 | 9/8/2010 07:49:01 | 25.27  |
| 9/7/2010 10:29:01 | 25.236 | 9/8/2010 08:09:01 | 25.27  |
| 9/7/2010 10:49:01 | 25.236 | 9/8/2010 08:29:01 | 25.27  |
| 9/7/2010 11:09:01 | 25.236 | 9/8/2010 08:49:01 | 25.207 |
| 9/7/2010 11:29:01 | 25.174 | 9/8/2010 09:09:01 | 25.207 |
| 9/7/2010 11:49:01 | 25.174 | 9/8/2010 09:29:01 | 25.207 |
| 9/7/2010 12:09:01 | 25.174 | 9/8/2010 09:49:01 | 25.145 |
| 9/7/2010 12:29:01 | 25.111 | 9/8/2010 10:09:01 | 25.145 |
| 9/7/2010 12:49:01 | 25.111 | 9/8/2010 10:29:01 | 25.145 |
| 9/7/2010 13:09:01 | 25.111 | 9/8/2010 10:49:01 | 25.145 |
| 9/7/2010 13:29:01 | 25.111 | 9/8/2010 11:09:01 | 25.082 |
| 9/7/2010 13:49:01 | 25.111 | 9/8/2010 11:29:01 | 25.082 |
| 9/7/2010 14:09:01 | 25.111 | 9/8/2010 11:49:01 | 25.082 |
| 9/7/2010 14:29:01 | 25.174 | 9/8/2010 12:09:01 | 25.02  |
| 9/7/2010 14:49:01 | 25.174 | 9/8/2010 12:29:01 | 25.02  |
| 9/7/2010 15:09:01 | 25.174 | 9/8/2010 12:49:01 | 25.02  |
| 9/7/2010 15:29:01 | 25.236 | 9/8/2010 13:09:01 | 24.958 |
| 9/7/2010 15:49:01 | 25.236 | 9/8/2010 13:29:01 | 24.958 |
| 9/7/2010 16:09:01 | 25.299 | 9/8/2010 13:49:01 | 24.958 |
| 9/7/2010 16:29:01 | 25.361 | 9/8/2010 14:09:01 | 24.958 |
| 9/7/2010 16:49:01 | 25.361 | 9/8/2010 14:29:01 | 24.958 |
| 9/7/2010 17:09:01 | 25.424 | 9/8/2010 14:49:01 | 24.895 |
| 9/7/2010 17:29:01 | 25.486 | 9/8/2010 15:09:01 | 24.895 |
| 9/7/2010 17:49:01 | 25.486 | 9/8/2010 15:29:01 | 24.895 |
| 9/7/2010 18:09:01 | 25.549 | 9/8/2010 15:49:01 | 24.895 |
| 9/7/2010 18:29:01 | 25.611 | 9/8/2010 16:09:01 | 24.895 |
| 9/7/2010 18:49:01 | 25.611 | 9/8/2010 16:29:01 | 24.895 |
| 9/7/2010 19:09:01 | 25.674 | 9/8/2010 16:49:01 | 24.895 |
| 9/7/2010 19:29:01 | 25.674 | 9/8/2010 17:09:01 | 24.895 |
| 9/7/2010 19:49:01 | 25.736 | 9/8/2010 17:29:01 | 24.895 |

|                   |        |                   |        |
|-------------------|--------|-------------------|--------|
| 9/7/2010 20:09:01 | 25.736 | 9/8/2010 17:49:01 | 24.895 |
| 9/7/2010 20:29:01 | 25.799 | 9/8/2010 18:09:01 | 24.895 |
| 9/7/2010 20:49:01 | 25.799 | 9/8/2010 18:29:01 | 24.895 |
| 9/7/2010 21:09:01 | 25.799 | 9/8/2010 18:49:01 | 24.895 |
| 9/7/2010 21:29:01 | 25.861 | 9/8/2010 19:09:01 | 24.958 |
| 9/7/2010 21:49:01 | 25.861 | 9/8/2010 19:29:01 | 24.958 |
| 9/7/2010 22:09:01 | 25.861 | 9/8/2010 19:49:01 | 24.958 |
| 9/7/2010 22:29:01 | 25.861 | 9/8/2010 20:09:01 | 24.958 |
| 9/7/2010 22:49:01 | 25.861 | 9/8/2010 20:29:01 | 24.958 |
| 9/7/2010 23:09:01 | 25.861 | 9/8/2010 20:49:01 | 25.02  |
| 9/7/2010 23:29:01 | 25.861 | 9/8/2010 21:09:01 | 25.02  |
| 9/7/2010 23:49:01 | 25.861 | 9/8/2010 21:29:01 | 25.02  |
| 9/8/2010 00:09:01 | 25.861 | 9/8/2010 21:49:01 | 25.02  |
| 9/8/2010 00:29:01 | 25.861 | 9/8/2010 22:09:01 | 25.082 |
| 9/8/2010 00:49:01 | 25.799 | 9/8/2010 22:29:01 | 25.082 |
| 9/8/2010 01:09:01 | 25.799 | 9/8/2010 22:49:01 | 25.082 |
| 9/8/2010 01:29:01 | 25.799 | 9/8/2010 23:09:01 | 25.082 |
| 9/8/2010 01:49:01 | 25.799 | 9/8/2010 23:29:01 | 25.082 |
| 9/8/2010 02:09:01 | 25.736 | 9/8/2010 23:49:01 | 25.145 |
| 9/8/2010 02:29:01 | 25.736 | 9/9/2010 00:09:01 | 25.145 |
| 9/8/2010 02:49:01 | 25.736 | 9/9/2010 00:29:01 | 25.145 |
| 9/8/2010 03:09:01 | 25.674 | 9/9/2010 00:49:01 | 25.145 |
| 9/8/2010 03:29:01 | 25.674 | 9/9/2010 01:09:01 | 25.145 |
| 9/8/2010 03:49:01 | 25.611 | 9/9/2010 01:29:01 | 25.145 |
| 9/8/2010 04:09:01 | 25.611 | 9/9/2010 01:49:01 | 25.207 |
| 9/8/2010 04:29:01 | 25.549 | 9/9/2010 02:09:01 | 25.207 |
| 9/8/2010 04:49:01 | 25.549 | 9/9/2010 02:29:01 | 25.207 |
| 9/8/2010 05:09:01 | 25.549 | 9/9/2010 02:49:01 | 25.207 |
| 9/8/2010 05:29:01 | 25.486 | 9/9/2010 03:09:01 | 25.207 |
| 9/8/2010 05:49:01 | 25.486 | 9/9/2010 03:29:01 | 25.207 |
| 9/8/2010 06:09:01 | 25.424 | 9/9/2010 03:49:01 | 25.207 |
| 9/8/2010 06:29:01 | 25.424 | 9/9/2010 04:09:01 | 25.207 |
| 9/8/2010 06:49:01 | 25.361 | 9/9/2010 04:29:01 | 25.207 |
| 9/8/2010 07:09:01 | 25.299 | 9/9/2010 04:49:01 | 25.207 |
| 9/8/2010 07:29:01 | 25.299 | 9/9/2010 05:09:01 | 25.207 |
| 9/8/2010 07:49:01 | 25.236 | 9/9/2010 05:29:01 | 25.207 |
| 9/8/2010 08:09:01 | 25.236 | 9/9/2010 05:49:01 | 25.145 |
| 9/8/2010 08:29:01 | 25.174 | 9/9/2010 06:09:01 | 25.145 |
| 9/8/2010 08:49:01 | 25.174 | 9/9/2010 06:29:01 | 25.145 |
| 9/8/2010 09:09:01 | 25.111 | 9/9/2010 06:49:01 | 25.145 |
| 9/8/2010 09:29:01 | 25.111 | 9/9/2010 07:09:01 | 25.145 |
| 9/8/2010 09:49:01 | 25.049 | 9/9/2010 07:29:01 | 25.145 |
| 9/8/2010 10:09:01 | 25.049 | 9/9/2010 07:49:01 | 25.145 |
| 9/8/2010 10:29:01 | 24.986 | 9/9/2010 08:09:01 | 25.082 |
| 9/8/2010 10:49:01 | 24.986 | 9/9/2010 08:29:01 | 25.082 |
| 9/8/2010 11:09:01 | 24.924 | 9/9/2010 08:49:01 | 25.082 |
| 9/8/2010 11:29:01 | 24.924 | 9/9/2010 09:09:01 | 25.082 |
| 9/8/2010 11:49:01 | 24.861 | 9/9/2010 09:29:01 | 25.082 |
| 9/8/2010 12:09:01 | 24.861 | 9/9/2010 09:49:01 | 25.02  |
| 9/8/2010 12:29:01 | 24.861 | 9/9/2010 10:09:01 | 25.02  |

|                   |        |                    |        |
|-------------------|--------|--------------------|--------|
| 9/8/2010 12:49:01 | 24.861 | 9/9/2010 10:29:01  | 25.02  |
| 9/8/2010 13:09:01 | 24.799 | 9/9/2010 10:49:01  | 25.02  |
| 9/8/2010 13:29:01 | 24.861 | 9/9/2010 11:09:01  | 24.958 |
| 9/8/2010 13:49:01 | 24.861 | 9/9/2010 11:29:01  | 24.958 |
| 9/8/2010 14:09:01 | 24.861 | 9/9/2010 11:49:01  | 24.958 |
| 9/8/2010 14:29:01 | 24.861 | 9/9/2010 12:09:01  | 24.895 |
| 9/8/2010 14:49:01 | 24.861 | 9/9/2010 12:29:01  | 24.895 |
| 9/8/2010 15:09:01 | 24.924 | 9/9/2010 12:49:01  | 24.895 |
| 9/8/2010 15:29:01 | 24.924 | 9/9/2010 13:09:01  | 24.895 |
| 9/8/2010 15:49:01 | 24.986 | 9/9/2010 13:29:01  | 24.833 |
| 9/8/2010 16:09:01 | 24.986 | 9/9/2010 13:49:01  | 24.833 |
| 9/8/2010 16:29:01 | 25.049 | 9/9/2010 14:09:01  | 24.833 |
| 9/8/2010 16:49:01 | 25.111 | 9/9/2010 14:29:01  | 24.833 |
| 9/8/2010 17:09:01 | 25.111 | 9/9/2010 14:49:01  | 24.833 |
| 9/8/2010 17:29:01 | 25.174 | 9/9/2010 15:09:01  | 24.833 |
| 9/8/2010 17:49:01 | 25.236 | 9/9/2010 15:29:01  | 24.833 |
| 9/8/2010 18:09:01 | 25.236 | 9/9/2010 15:49:01  | 24.833 |
| 9/8/2010 18:29:01 | 25.299 | 9/9/2010 16:09:01  | 24.77  |
| 9/8/2010 18:49:01 | 25.361 | 9/9/2010 16:29:01  | 24.77  |
| 9/8/2010 19:09:01 | 25.361 | 9/9/2010 16:49:01  | 24.77  |
| 9/8/2010 19:29:01 | 25.424 | 9/9/2010 17:09:01  | 24.77  |
| 9/8/2010 19:49:01 | 25.486 | 9/9/2010 17:29:01  | 24.77  |
| 9/8/2010 20:09:01 | 25.486 | 9/9/2010 17:49:01  | 24.833 |
| 9/8/2010 20:29:01 | 25.486 | 9/9/2010 18:09:01  | 24.833 |
| 9/8/2010 20:49:01 | 25.549 | 9/9/2010 18:29:01  | 24.833 |
| 9/8/2010 21:09:01 | 25.549 | 9/9/2010 18:49:01  | 24.833 |
| 9/8/2010 21:29:01 | 25.549 | 9/9/2010 19:09:01  | 24.833 |
| 9/8/2010 21:49:01 | 25.611 | 9/9/2010 19:29:01  | 24.833 |
| 9/8/2010 22:09:01 | 25.611 | 9/9/2010 19:49:01  | 24.895 |
| 9/8/2010 22:29:01 | 25.611 | 9/9/2010 20:09:01  | 24.895 |
| 9/8/2010 22:49:01 | 25.611 | 9/9/2010 20:29:01  | 24.895 |
| 9/8/2010 23:09:01 | 25.611 | 9/9/2010 20:49:01  | 24.895 |
| 9/8/2010 23:29:01 | 25.611 | 9/9/2010 21:09:01  | 24.958 |
| 9/8/2010 23:49:01 | 25.611 | 9/9/2010 21:29:01  | 24.958 |
| 9/9/2010 00:09:01 | 25.611 | 9/9/2010 21:49:01  | 24.958 |
| 9/9/2010 00:29:01 | 25.611 | 9/9/2010 22:09:01  | 24.958 |
| 9/9/2010 00:49:01 | 25.611 | 9/9/2010 22:29:01  | 25.02  |
| 9/9/2010 01:09:01 | 25.611 | 9/9/2010 22:49:01  | 25.02  |
| 9/9/2010 01:29:01 | 25.549 | 9/9/2010 23:09:01  | 25.02  |
| 9/9/2010 01:49:01 | 25.549 | 9/9/2010 23:29:01  | 25.02  |
| 9/9/2010 02:09:01 | 25.549 | 9/9/2010 23:49:01  | 25.02  |
| 9/9/2010 02:29:01 | 25.486 | 9/10/2010 00:09:01 | 25.082 |
| 9/9/2010 02:49:01 | 25.486 | 9/10/2010 00:29:01 | 25.082 |
| 9/9/2010 03:09:01 | 25.486 | 9/10/2010 00:49:01 | 25.082 |
| 9/9/2010 03:29:01 | 25.424 | 9/10/2010 01:09:01 | 25.082 |
| 9/9/2010 03:49:01 | 25.424 | 9/10/2010 01:29:01 | 25.082 |
| 9/9/2010 04:09:01 | 25.424 | 9/10/2010 01:49:01 | 25.082 |
| 9/9/2010 04:29:01 | 25.361 | 9/10/2010 02:09:01 | 25.145 |
| 9/9/2010 04:49:01 | 25.361 | 9/10/2010 02:29:01 | 25.145 |
| 9/9/2010 05:09:01 | 25.361 | 9/10/2010 02:49:01 | 25.145 |

|                   |        |                    |        |
|-------------------|--------|--------------------|--------|
| 9/9/2010 05:29:01 | 25.299 | 9/10/2010 03:09:01 | 25.145 |
| 9/9/2010 05:49:01 | 25.299 | 9/10/2010 03:29:01 | 25.145 |
| 9/9/2010 06:09:01 | 25.236 | 9/10/2010 03:49:01 | 25.145 |
| 9/9/2010 06:29:01 | 25.236 | 9/10/2010 04:09:01 | 25.145 |
| 9/9/2010 06:49:01 | 25.174 | 9/10/2010 04:29:01 | 25.145 |
| 9/9/2010 07:09:01 | 25.174 | 9/10/2010 04:49:01 | 25.145 |
| 9/9/2010 07:29:01 | 25.111 | 9/10/2010 05:09:01 | 25.145 |
| 9/9/2010 07:49:01 | 25.111 | 9/10/2010 05:29:01 | 25.145 |
| 9/9/2010 08:09:01 | 25.049 | 9/10/2010 05:49:01 | 25.145 |
| 9/9/2010 08:29:01 | 25.049 | 9/10/2010 06:09:01 | 25.082 |
| 9/9/2010 08:49:01 | 24.986 | 9/10/2010 06:29:01 | 25.082 |
| 9/9/2010 09:09:01 | 24.986 | 9/10/2010 06:49:01 | 25.082 |
| 9/9/2010 09:29:01 | 24.924 | 9/10/2010 07:09:01 | 25.082 |
| 9/9/2010 09:49:01 | 24.924 | 9/10/2010 07:29:01 | 25.082 |
| 9/9/2010 10:09:01 | 24.861 | 9/10/2010 07:49:01 | 25.082 |
| 9/9/2010 10:29:01 | 24.861 | 9/10/2010 08:09:01 | 25.082 |
| 9/9/2010 10:49:01 | 24.861 | 9/10/2010 08:29:01 | 25.02  |
| 9/9/2010 11:09:01 | 24.799 | 9/10/2010 08:49:01 | 25.02  |
| 9/9/2010 11:29:01 | 24.799 | 9/10/2010 09:09:01 | 25.02  |
| 9/9/2010 11:49:01 | 24.799 | 9/10/2010 09:29:01 | 25.02  |
| 9/9/2010 12:09:01 | 24.736 | 9/10/2010 09:49:01 | 25.02  |
| 9/9/2010 12:29:01 | 24.736 | 9/10/2010 10:09:01 | 24.958 |
| 9/9/2010 12:49:01 | 24.736 | 9/10/2010 10:29:01 | 24.958 |
| 9/9/2010 13:09:01 | 24.736 | 9/10/2010 10:49:01 | 24.958 |
| 9/9/2010 13:29:01 | 24.736 | 9/10/2010 11:09:01 | 24.958 |
| 9/9/2010 13:49:01 | 24.736 | 9/10/2010 11:29:01 | 24.895 |
| 9/9/2010 14:09:01 | 24.736 | 9/10/2010 11:49:01 | 24.895 |
| 9/9/2010 14:29:01 | 24.736 | 9/10/2010 12:09:01 | 24.895 |
| 9/9/2010 14:49:01 | 24.799 | 9/10/2010 12:29:01 | 24.895 |
| 9/9/2010 15:09:01 | 24.799 | 9/10/2010 12:49:01 | 24.833 |
| 9/9/2010 15:29:01 | 24.861 | 9/10/2010 13:09:01 | 24.833 |
| 9/9/2010 15:49:01 | 24.861 | 9/10/2010 13:29:01 | 24.833 |
| 9/9/2010 16:09:01 | 24.924 | 9/10/2010 13:49:01 | 24.833 |
| 9/9/2010 16:29:01 | 24.986 | 9/10/2010 14:09:01 | 24.77  |
| 9/9/2010 16:49:01 | 24.986 | 9/10/2010 14:29:01 | 24.77  |
| 9/9/2010 17:09:01 | 25.049 | 9/10/2010 14:49:01 | 24.77  |
| 9/9/2010 17:29:01 | 25.111 | 9/10/2010 15:09:01 | 24.77  |
| 9/9/2010 17:49:01 | 25.174 | 9/10/2010 15:29:01 | 24.77  |
| 9/9/2010 18:09:01 | 25.174 | 9/10/2010 15:49:01 | 24.77  |
| 9/9/2010 18:29:01 | 25.236 | 9/10/2010 16:09:01 | 24.77  |
| 9/9/2010 18:49:01 | 25.299 | 9/10/2010 16:29:01 | 24.77  |
| 9/9/2010 19:09:01 | 25.299 | 9/10/2010 16:49:01 | 24.77  |
| 9/9/2010 19:29:01 | 25.361 | 9/10/2010 17:09:01 | 24.77  |
| 9/9/2010 19:49:01 | 25.424 | 9/10/2010 17:29:01 | 24.77  |
| 9/9/2010 20:09:01 | 25.424 | 9/10/2010 17:49:01 | 24.77  |
| 9/9/2010 20:29:01 | 25.424 | 9/10/2010 18:09:01 | 24.77  |
| 9/9/2010 20:49:01 | 25.486 | 9/10/2010 18:29:01 | 24.833 |
| 9/9/2010 21:09:01 | 25.486 | 9/10/2010 18:49:01 | 24.833 |
| 9/9/2010 21:29:01 | 25.486 | 9/10/2010 19:09:01 | 24.833 |
| 9/9/2010 21:49:01 | 25.549 | 9/10/2010 19:29:01 | 24.833 |

|                    |        |                    |        |
|--------------------|--------|--------------------|--------|
| 9/9/2010 22:09:01  | 25.549 | 9/10/2010 19:49:01 | 24.833 |
| 9/9/2010 22:29:01  | 25.549 | 9/10/2010 20:09:01 | 24.895 |
| 9/9/2010 22:49:01  | 25.549 | 9/10/2010 20:29:01 | 24.895 |
| 9/9/2010 23:09:01  | 25.549 | 9/10/2010 20:49:01 | 24.895 |
| 9/9/2010 23:29:01  | 25.549 | 9/10/2010 21:09:01 | 24.958 |
| 9/9/2010 23:49:01  | 25.549 | 9/10/2010 21:29:01 | 24.958 |
| 9/10/2010 00:09:01 | 25.549 | 9/10/2010 21:49:01 | 24.958 |
| 9/10/2010 00:29:01 | 25.486 | 9/10/2010 22:09:01 | 24.958 |
| 9/10/2010 00:49:01 | 25.486 | 9/10/2010 22:29:01 | 25.02  |
| 9/10/2010 01:09:01 | 25.486 | 9/10/2010 22:49:01 | 25.02  |
| 9/10/2010 01:29:01 | 25.486 | 9/10/2010 23:09:01 | 25.02  |
| 9/10/2010 01:49:01 | 25.486 | 9/10/2010 23:29:01 | 25.02  |
| 9/10/2010 02:09:01 | 25.424 | 9/10/2010 23:49:01 | 25.082 |
| 9/10/2010 02:29:01 | 25.424 | 9/11/2010 00:09:01 | 25.082 |
| 9/10/2010 02:49:01 | 25.424 | 9/11/2010 00:29:01 | 25.082 |
| 9/10/2010 03:09:01 | 25.361 | 9/11/2010 00:49:01 | 25.082 |
| 9/10/2010 03:29:01 | 25.361 | 9/11/2010 01:09:01 | 25.082 |
| 9/10/2010 03:49:01 | 25.361 | 9/11/2010 01:29:01 | 25.145 |
| 9/10/2010 04:09:01 | 25.299 | 9/11/2010 01:49:01 | 25.145 |
| 9/10/2010 04:29:01 | 25.299 | 9/11/2010 02:09:01 | 25.145 |
| 9/10/2010 04:49:01 | 25.299 | 9/11/2010 02:29:01 | 25.145 |
| 9/10/2010 05:09:01 | 25.236 | 9/11/2010 02:49:01 | 25.145 |
| 9/10/2010 05:29:01 | 25.236 | 9/11/2010 03:09:01 | 25.145 |
| 9/10/2010 05:49:01 | 25.174 | 9/11/2010 03:29:01 | 25.145 |
| 9/10/2010 06:09:01 | 25.174 | 9/11/2010 03:49:01 | 25.145 |
| 9/10/2010 06:29:01 | 25.174 | 9/11/2010 04:09:01 | 25.145 |
| 9/10/2010 06:49:01 | 25.111 | 9/11/2010 04:29:01 | 25.145 |
| 9/10/2010 07:09:01 | 25.111 | 9/11/2010 04:49:01 | 25.145 |
| 9/10/2010 07:29:01 | 25.049 | 9/11/2010 05:09:01 | 25.145 |
| 9/10/2010 07:49:01 | 25.049 | 9/11/2010 05:29:01 | 25.145 |
| 9/10/2010 08:09:01 | 24.986 | 9/11/2010 05:49:01 | 25.145 |
| 9/10/2010 08:29:01 | 24.986 | 9/11/2010 06:09:01 | 25.145 |
| 9/10/2010 08:49:01 | 24.924 | 9/11/2010 06:29:01 | 25.145 |
| 9/10/2010 09:09:01 | 24.924 | 9/11/2010 06:49:01 | 25.145 |
| 9/10/2010 09:29:01 | 24.861 | 9/11/2010 07:09:01 | 25.145 |
| 9/10/2010 09:49:01 | 24.861 | 9/11/2010 07:29:01 | 25.082 |
| 9/10/2010 10:09:01 | 24.799 | 9/11/2010 07:49:01 | 25.082 |
| 9/10/2010 10:29:01 | 24.799 | 9/11/2010 08:09:01 | 25.082 |
| 9/10/2010 10:49:01 | 24.736 | 9/11/2010 08:29:01 | 25.082 |
| 9/10/2010 11:09:01 | 24.736 | 9/11/2010 08:49:01 | 25.082 |
| 9/10/2010 11:29:01 | 24.736 | 9/11/2010 09:09:01 | 25.02  |
| 9/10/2010 11:49:01 | 24.736 | 9/11/2010 09:29:01 | 25.02  |
| 9/10/2010 12:09:01 | 24.674 | 9/11/2010 09:49:01 | 25.02  |
| 9/10/2010 12:29:01 | 24.674 | 9/11/2010 10:09:01 | 25.02  |
| 9/10/2010 12:49:01 | 24.674 | 9/11/2010 10:29:01 | 25.02  |
| 9/10/2010 13:09:01 | 24.674 | 9/11/2010 10:49:01 | 24.958 |
| 9/10/2010 13:29:01 | 24.674 | 9/11/2010 11:09:01 | 24.958 |
| 9/10/2010 13:49:01 | 24.674 | 9/11/2010 11:29:01 | 24.958 |
| 9/10/2010 14:09:01 | 24.674 | 9/11/2010 11:49:01 | 24.958 |
| 9/10/2010 14:29:01 | 24.674 | 9/11/2010 12:09:01 | 24.895 |



|                    |        |                    |        |
|--------------------|--------|--------------------|--------|
| 9/10/2010 14:49:01 | 24.736 | 9/11/2010 12:29:01 | 24.895 |
| 9/10/2010 15:09:01 | 24.736 | 9/11/2010 12:49:01 | 24.895 |
| 9/10/2010 15:29:01 | 24.799 | 9/11/2010 13:09:01 | 24.833 |
| 9/10/2010 15:49:01 | 24.799 | 9/11/2010 13:29:01 | 24.833 |
| 9/10/2010 16:09:01 | 24.861 | 9/11/2010 13:49:01 | 24.833 |
| 9/10/2010 16:29:01 | 24.924 | 9/11/2010 14:09:01 | 24.833 |
| 9/10/2010 16:49:01 | 24.924 | 9/11/2010 14:29:01 | 24.833 |
| 9/10/2010 17:09:01 | 24.986 | 9/11/2010 14:49:01 | 24.833 |
| 9/10/2010 17:29:01 | 25.049 | 9/11/2010 15:09:01 | 24.833 |
| 9/10/2010 17:49:01 | 25.111 | 9/11/2010 15:29:01 | 24.833 |
| 9/10/2010 18:09:01 | 25.174 | 9/11/2010 15:49:01 | 24.77  |
| 9/10/2010 18:29:01 | 25.174 | 9/11/2010 16:09:01 | 24.77  |
| 9/10/2010 18:49:01 | 25.236 | 9/11/2010 16:29:01 | 24.77  |
| 9/10/2010 19:09:01 | 25.299 | 9/11/2010 16:49:01 | 24.833 |
| 9/10/2010 19:29:01 | 25.299 | 9/11/2010 17:09:01 | 24.833 |
| 9/10/2010 19:49:01 | 25.361 | 9/11/2010 17:29:01 | 24.833 |
| 9/10/2010 20:09:01 | 25.424 | 9/11/2010 17:49:01 | 24.833 |
| 9/10/2010 20:29:01 | 25.424 | 9/11/2010 18:09:01 | 24.833 |
| 9/10/2010 20:49:01 | 25.424 | 9/11/2010 18:29:01 | 24.833 |
| 9/10/2010 21:09:01 | 25.486 | 9/11/2010 18:49:01 | 24.833 |
| 9/10/2010 21:29:01 | 25.486 | 9/11/2010 19:09:01 | 24.895 |
| 9/10/2010 21:49:01 | 25.486 | 9/11/2010 19:29:01 | 24.895 |
| 9/10/2010 22:09:01 | 25.549 | 9/11/2010 19:49:01 | 24.895 |
| 9/10/2010 22:29:01 | 25.549 | 9/11/2010 20:09:01 | 24.895 |
| 9/10/2010 22:49:01 | 25.549 | 9/11/2010 20:29:01 | 24.958 |
| 9/10/2010 23:09:01 | 25.549 | 9/11/2010 20:49:01 | 24.958 |
| 9/10/2010 23:29:01 | 25.549 | 9/11/2010 21:09:01 | 24.958 |
| 9/10/2010 23:49:01 | 25.549 | 9/11/2010 21:29:01 | 25.02  |
| 9/11/2010 00:09:01 | 25.549 | 9/11/2010 21:49:01 | 25.02  |
| 9/11/2010 00:29:01 | 25.549 | 9/11/2010 22:09:01 | 25.02  |
| 9/11/2010 00:49:01 | 25.549 | 9/11/2010 22:29:01 | 25.02  |
| 9/11/2010 01:09:01 | 25.549 | 9/11/2010 22:49:01 | 25.082 |
| 9/11/2010 01:29:01 | 25.486 | 9/11/2010 23:09:01 | 25.082 |
| 9/11/2010 01:49:01 | 25.486 | 9/11/2010 23:29:01 | 25.082 |
| 9/11/2010 02:09:01 | 25.486 | 9/11/2010 23:49:01 | 25.145 |
| 9/11/2010 02:29:01 | 25.486 | 9/12/2010 00:09:01 | 25.145 |
| 9/11/2010 02:49:01 | 25.424 | 9/12/2010 00:29:01 | 25.145 |
| 9/11/2010 03:09:01 | 25.424 | 9/12/2010 00:49:01 | 25.145 |
| 9/11/2010 03:29:01 | 25.424 | 9/12/2010 01:09:01 | 25.207 |
| 9/11/2010 03:49:01 | 25.361 | 9/12/2010 01:29:01 | 25.207 |
| 9/11/2010 04:09:01 | 25.361 | 9/12/2010 01:49:01 | 25.207 |
| 9/11/2010 04:29:01 | 25.361 | 9/12/2010 02:09:01 | 25.207 |
| 9/11/2010 04:49:01 | 25.299 | 9/12/2010 02:29:01 | 25.207 |
| 9/11/2010 05:09:01 | 25.299 | 9/12/2010 02:49:01 | 25.207 |
| 9/11/2010 05:29:01 | 25.299 | 9/12/2010 03:09:01 | 25.207 |
| 9/11/2010 05:49:01 | 25.236 | 9/12/2010 03:29:01 | 25.27  |
| 9/11/2010 06:09:01 | 25.236 | 9/12/2010 03:49:01 | 25.27  |
| 9/11/2010 06:29:01 | 25.174 | 9/12/2010 04:09:01 | 25.27  |
| 9/11/2010 06:49:01 | 25.174 | 9/12/2010 04:29:01 | 25.27  |
| 9/11/2010 07:09:01 | 25.111 | 9/12/2010 04:49:01 | 25.27  |

|                    |        |                    |        |
|--------------------|--------|--------------------|--------|
| 9/11/2010 07:29:01 | 25.111 | 9/12/2010 05:09:01 | 25.27  |
| 9/11/2010 07:49:01 | 25.111 | 9/12/2010 05:29:01 | 25.27  |
| 9/11/2010 08:09:01 | 25.049 | 9/12/2010 05:49:01 | 25.27  |
| 9/11/2010 08:29:01 | 24.986 | 9/12/2010 06:09:01 | 25.27  |
| 9/11/2010 08:49:01 | 24.986 | 9/12/2010 06:29:01 | 25.27  |
| 9/11/2010 09:09:01 | 24.924 | 9/12/2010 06:49:01 | 25.27  |
| 9/11/2010 09:29:01 | 24.924 | 9/12/2010 07:09:01 | 25.27  |
| 9/11/2010 09:49:01 | 24.924 | 9/12/2010 07:29:01 | 25.27  |
| 9/11/2010 10:09:01 | 24.861 | 9/12/2010 07:49:01 | 25.27  |
| 9/11/2010 10:29:01 | 24.861 | 9/12/2010 08:09:01 | 25.207 |
| 9/11/2010 10:49:01 | 24.799 | 9/12/2010 08:29:01 | 25.207 |
| 9/11/2010 11:09:01 | 24.799 | 9/12/2010 08:49:01 | 25.207 |
| 9/11/2010 11:29:01 | 24.799 | 9/12/2010 09:09:01 | 25.207 |
| 9/11/2010 11:49:01 | 24.736 | 9/12/2010 09:29:01 | 25.207 |
| 9/11/2010 12:09:01 | 24.736 | 9/12/2010 09:49:01 | 25.207 |
| 9/11/2010 12:29:01 | 24.736 | 9/12/2010 10:09:01 | 25.207 |
| 9/11/2010 12:49:01 | 24.736 | 9/12/2010 10:29:01 | 25.145 |
| 9/11/2010 13:09:01 | 24.736 | 9/12/2010 10:49:01 | 25.145 |
| 9/11/2010 13:29:01 | 24.736 | 9/12/2010 11:09:01 | 25.145 |
| 9/11/2010 13:49:01 | 24.736 | 9/12/2010 11:29:01 | 25.145 |
| 9/11/2010 14:09:01 | 24.736 | 9/12/2010 11:49:01 | 25.145 |
| 9/11/2010 14:29:01 | 24.736 | 9/12/2010 12:09:01 | 25.145 |
| 9/11/2010 14:49:01 | 24.799 | 9/12/2010 12:29:01 | 25.082 |
| 9/11/2010 15:09:01 | 24.799 | 9/12/2010 12:49:01 | 25.082 |
| 9/11/2010 15:29:01 | 24.861 | 9/12/2010 13:09:01 | 25.082 |
| 9/11/2010 15:49:01 | 24.861 | 9/12/2010 13:29:01 | 25.082 |
| 9/11/2010 16:09:01 | 24.924 | 9/12/2010 13:49:01 | 25.082 |
| 9/11/2010 16:29:01 | 24.986 | 9/12/2010 14:09:01 | 25.082 |
| 9/11/2010 16:49:01 | 24.986 | 9/12/2010 14:29:01 | 25.082 |
| 9/11/2010 17:09:01 | 25.049 | 9/12/2010 14:49:01 | 25.082 |
| 9/11/2010 17:29:01 | 25.111 | 9/12/2010 15:09:01 | 25.082 |
| 9/11/2010 17:49:01 | 25.174 | 9/12/2010 15:29:01 | 25.082 |
| 9/11/2010 18:09:01 | 25.236 | 9/12/2010 15:49:01 | 25.082 |
| 9/11/2010 18:29:01 | 25.236 | 9/12/2010 16:09:01 | 25.082 |
| 9/11/2010 18:49:01 | 25.299 | 9/12/2010 16:29:01 | 25.082 |
| 9/11/2010 19:09:01 | 25.361 | 9/12/2010 16:49:01 | 25.082 |
| 9/11/2010 19:29:01 | 25.361 | 9/12/2010 17:09:01 | 25.082 |
| 9/11/2010 19:49:01 | 25.424 | 9/12/2010 17:29:01 | 25.082 |
| 9/11/2010 20:09:01 | 25.486 | 9/12/2010 17:49:01 | 25.082 |
| 9/11/2010 20:29:01 | 25.486 | 9/12/2010 18:09:01 | 25.082 |
| 9/11/2010 20:49:01 | 25.549 | 9/12/2010 18:29:01 | 25.145 |
| 9/11/2010 21:09:01 | 25.549 | 9/12/2010 18:49:01 | 25.145 |
| 9/11/2010 21:29:01 | 25.549 | 9/12/2010 19:09:01 | 25.145 |
| 9/11/2010 21:49:01 | 25.611 | 9/12/2010 19:29:01 | 25.145 |
| 9/11/2010 22:09:01 | 25.611 | 9/12/2010 19:49:01 | 25.207 |
| 9/11/2010 22:29:01 | 25.611 | 9/12/2010 20:09:01 | 25.207 |
| 9/11/2010 22:49:01 | 25.611 | 9/12/2010 20:29:01 | 25.207 |
| 9/11/2010 23:09:01 | 25.611 | 9/12/2010 20:49:01 | 25.27  |
| 9/11/2010 23:29:01 | 25.674 | 9/12/2010 21:09:01 | 25.27  |
| 9/11/2010 23:49:01 | 25.611 | 9/12/2010 21:29:01 | 25.332 |

|                    |        |                    |        |
|--------------------|--------|--------------------|--------|
| 9/12/2010 00:09:01 | 25.674 | 9/12/2010 21:49:01 | 25.332 |
| 9/12/2010 00:29:01 | 25.674 | 9/12/2010 22:09:01 | 25.332 |
| 9/12/2010 00:49:01 | 25.674 | 9/12/2010 22:29:01 | 25.332 |
| 9/12/2010 01:09:01 | 25.611 | 9/12/2010 22:49:01 | 25.395 |
| 9/12/2010 01:29:01 | 25.611 | 9/12/2010 23:09:01 | 25.395 |
| 9/12/2010 01:49:01 | 25.611 | 9/12/2010 23:29:01 | 25.395 |
| 9/12/2010 02:09:01 | 25.611 | 9/12/2010 23:49:01 | 25.457 |
| 9/12/2010 02:29:01 | 25.611 | 9/13/2010 00:09:01 | 25.457 |
| 9/12/2010 02:49:01 | 25.611 | 9/13/2010 00:29:01 | 25.457 |
| 9/12/2010 03:09:01 | 25.611 | 9/13/2010 00:49:01 | 25.457 |
| 9/12/2010 03:29:01 | 25.611 | 9/13/2010 01:09:01 | 25.52  |
| 9/12/2010 03:49:01 | 25.549 | 9/13/2010 01:29:01 | 25.52  |
| 9/12/2010 04:09:01 | 25.549 | 9/13/2010 01:49:01 | 25.52  |
| 9/12/2010 04:29:01 | 25.549 | 9/13/2010 02:09:01 | 25.52  |
| 9/12/2010 04:49:01 | 25.486 | 9/13/2010 02:29:01 | 25.52  |
| 9/12/2010 05:09:01 | 25.486 | 9/13/2010 02:49:01 | 25.582 |
| 9/12/2010 05:29:01 | 25.486 | 9/13/2010 03:09:01 | 25.582 |
| 9/12/2010 05:49:01 | 25.486 | 9/13/2010 03:29:01 | 25.582 |
| 9/12/2010 06:09:01 | 25.424 | 9/13/2010 03:49:01 | 25.582 |
| 9/12/2010 06:29:01 | 25.424 | 9/13/2010 04:09:01 | 25.582 |
| 9/12/2010 06:49:01 | 25.424 | 9/13/2010 04:29:01 | 25.582 |
| 9/12/2010 07:09:01 | 25.361 | 9/13/2010 04:49:01 | 25.582 |
| 9/12/2010 07:29:01 | 25.361 | 9/13/2010 05:09:01 | 25.582 |
| 9/12/2010 07:49:01 | 25.361 | 9/13/2010 05:29:01 | 25.645 |
| 9/12/2010 08:09:01 | 25.361 | 9/13/2010 05:49:01 | 25.645 |
| 9/12/2010 08:29:01 | 25.299 | 9/13/2010 06:09:01 | 25.645 |
| 9/12/2010 08:49:01 | 25.299 | 9/13/2010 06:29:01 | 25.645 |
| 9/12/2010 09:09:01 | 25.236 | 9/13/2010 06:49:01 | 25.645 |
| 9/12/2010 09:29:01 | 25.236 | 9/13/2010 07:09:01 | 25.645 |
| 9/12/2010 09:49:01 | 25.236 | 9/13/2010 07:29:01 | 25.645 |
| 9/12/2010 10:09:01 | 25.174 | 9/13/2010 07:49:01 | 25.645 |
| 9/12/2010 10:29:01 | 25.174 | 9/13/2010 08:09:01 | 25.582 |
| 9/12/2010 10:49:01 | 25.174 | 9/13/2010 08:29:01 | 25.645 |
| 9/12/2010 11:09:01 | 25.174 | 9/13/2010 08:49:01 | 25.582 |
| 9/12/2010 11:29:01 | 25.111 | 9/13/2010 09:09:01 | 25.582 |
| 9/12/2010 11:49:01 | 25.111 | 9/13/2010 09:29:01 | 25.582 |
| 9/12/2010 12:09:01 | 25.111 | 9/13/2010 09:49:01 | 25.582 |
| 9/12/2010 12:29:01 | 25.111 | 9/13/2010 10:09:01 | 25.582 |
| 9/12/2010 12:49:01 | 25.111 | 9/13/2010 10:29:01 | 25.582 |
| 9/12/2010 13:09:01 | 25.111 | 9/13/2010 10:49:01 | 25.582 |
| 9/12/2010 13:29:01 | 25.111 | 9/13/2010 11:09:01 | 25.582 |
| 9/12/2010 13:49:01 | 25.111 | 9/13/2010 11:29:01 | 25.582 |
| 9/12/2010 14:09:01 | 25.111 | 9/13/2010 11:49:01 | 25.582 |
| 9/12/2010 14:29:01 | 25.174 | 9/13/2010 12:09:01 | 25.52  |
| 9/12/2010 14:49:01 | 25.174 | 9/13/2010 12:29:01 | 25.52  |
| 9/12/2010 15:09:01 | 25.174 | 9/13/2010 12:49:01 | 25.52  |
| 9/12/2010 15:29:01 | 25.236 | 9/13/2010 13:09:01 | 25.52  |
| 9/12/2010 15:49:01 | 25.236 | 9/13/2010 13:29:01 | 25.52  |
| 9/12/2010 16:09:01 | 25.299 | 9/13/2010 13:49:01 | 25.52  |
| 9/12/2010 16:29:01 | 25.361 | 9/13/2010 14:09:01 | 25.52  |

|                    |        |                    |        |
|--------------------|--------|--------------------|--------|
| 9/12/2010 16:49:01 | 25.361 | 9/13/2010 14:29:01 | 25.52  |
| 9/12/2010 17:09:01 | 25.424 | 9/13/2010 14:49:01 | 25.52  |
| 9/12/2010 17:29:01 | 25.486 | 9/13/2010 15:09:01 | 25.52  |
| 9/12/2010 17:49:01 | 25.549 | 9/13/2010 15:29:01 | 25.52  |
| 9/12/2010 18:09:01 | 25.549 | 9/13/2010 15:49:01 | 25.52  |
| 9/12/2010 18:29:01 | 25.611 | 9/13/2010 16:09:01 | 25.52  |
| 9/12/2010 18:49:01 | 25.674 | 9/13/2010 16:29:01 | 25.52  |
| 9/12/2010 19:09:01 | 25.674 | 9/13/2010 16:49:01 | 25.52  |
| 9/12/2010 19:29:01 | 25.736 | 9/13/2010 17:09:01 | 25.52  |
| 9/12/2010 19:49:01 | 25.799 | 9/13/2010 17:29:01 | 25.52  |
| 9/12/2010 20:09:01 | 25.799 | 9/13/2010 17:49:01 | 25.52  |
| 9/12/2010 20:29:01 | 25.799 | 9/13/2010 18:09:01 | 25.582 |
| 9/12/2010 20:49:01 | 25.861 | 9/13/2010 18:29:01 | 25.582 |
| 9/12/2010 21:09:01 | 25.861 | 9/13/2010 18:49:01 | 25.582 |
| 9/12/2010 21:29:01 | 25.924 | 9/13/2010 19:09:01 | 25.582 |
| 9/12/2010 21:49:01 | 25.924 | 9/13/2010 19:29:01 | 25.645 |
| 9/12/2010 22:09:01 | 25.924 | 9/13/2010 19:49:01 | 25.645 |
| 9/12/2010 22:29:01 | 25.986 | 9/13/2010 20:09:01 | 25.645 |
| 9/12/2010 22:49:01 | 25.986 | 9/13/2010 20:29:01 | 25.645 |
| 9/12/2010 23:09:01 | 25.986 | 9/13/2010 20:49:01 | 25.707 |
| 9/12/2010 23:29:01 | 25.986 | 9/13/2010 21:09:01 | 25.707 |
| 9/12/2010 23:49:01 | 25.986 | 9/13/2010 21:29:01 | 25.707 |
| 9/13/2010 00:09:01 | 25.986 | 9/13/2010 21:49:01 | 25.707 |
| 9/13/2010 00:29:01 | 26.049 | 9/13/2010 22:09:01 | 25.77  |
| 9/13/2010 00:49:01 | 26.049 | 9/13/2010 22:29:01 | 25.77  |
| 9/13/2010 01:09:01 | 26.049 | 9/13/2010 22:49:01 | 25.77  |
| 9/13/2010 01:29:01 | 26.049 | 9/13/2010 23:09:01 | 25.77  |
| 9/13/2010 01:49:01 | 26.049 | 9/13/2010 23:29:01 | 25.832 |
| 9/13/2010 02:09:01 | 26.049 | 9/13/2010 23:49:01 | 25.832 |
| 9/13/2010 02:29:01 | 25.986 | 9/14/2010 00:09:01 | 25.832 |
| 9/13/2010 02:49:01 | 25.986 | 9/14/2010 00:29:01 | 25.832 |
| 9/13/2010 03:09:01 | 25.986 | 9/14/2010 00:49:01 | 25.895 |
| 9/13/2010 03:29:01 | 25.986 | 9/14/2010 01:09:01 | 25.895 |
| 9/13/2010 03:49:01 | 25.986 | 9/14/2010 01:29:01 | 25.895 |
| 9/13/2010 04:09:01 | 25.986 | 9/14/2010 01:49:01 | 25.895 |
| 9/13/2010 04:29:01 | 25.924 | 9/14/2010 02:09:01 | 25.895 |
| 9/13/2010 04:49:01 | 25.924 | 9/14/2010 02:29:01 | 25.895 |
| 9/13/2010 05:09:01 | 25.924 | 9/14/2010 02:49:01 | 25.957 |
| 9/13/2010 05:29:01 | 25.924 | 9/14/2010 03:09:01 | 25.957 |
| 9/13/2010 05:49:01 | 25.924 | 9/14/2010 03:29:01 | 25.957 |
| 9/13/2010 06:09:01 | 25.861 | 9/14/2010 03:49:01 | 25.957 |
| 9/13/2010 06:29:01 | 25.861 | 9/14/2010 04:09:01 | 25.957 |
| 9/13/2010 06:49:01 | 25.861 | 9/14/2010 04:29:01 | 25.957 |
| 9/13/2010 07:09:01 | 25.799 | 9/14/2010 04:49:01 | 25.957 |
| 9/13/2010 07:29:01 | 25.799 | 9/14/2010 05:09:01 | 25.957 |
| 9/13/2010 07:49:01 | 25.799 | 9/14/2010 05:29:01 | 25.957 |
| 9/13/2010 08:09:01 | 25.736 | 9/14/2010 05:49:01 | 25.957 |
| 9/13/2010 08:29:01 | 25.736 | 9/14/2010 06:09:01 | 25.957 |
| 9/13/2010 08:49:01 | 25.736 | 9/14/2010 06:29:01 | 25.957 |
| 9/13/2010 09:09:01 | 25.736 | 9/14/2010 06:49:01 | 25.957 |

|                    |        |                    |        |
|--------------------|--------|--------------------|--------|
| 9/13/2010 09:29:01 | 25.674 | 9/14/2010 07:09:01 | 25.957 |
| 9/13/2010 09:49:01 | 25.674 | 9/14/2010 07:29:01 | 25.957 |
| 9/13/2010 10:09:01 | 25.674 | 9/14/2010 07:49:01 | 25.957 |
| 9/13/2010 10:29:01 | 25.611 | 9/14/2010 08:09:01 | 25.957 |
| 9/13/2010 10:49:01 | 25.611 | 9/14/2010 08:29:01 | 25.895 |
| 9/13/2010 11:09:01 | 25.611 | 9/14/2010 08:49:01 | 25.895 |
| 9/13/2010 11:29:01 | 25.611 | 9/14/2010 09:09:01 | 25.895 |
| 9/13/2010 11:49:01 | 25.611 | 9/14/2010 09:29:01 | 25.895 |
| 9/13/2010 12:09:01 | 25.611 | 9/14/2010 09:49:01 | 25.895 |
| 9/13/2010 12:29:01 | 25.611 | 9/14/2010 10:09:01 | 25.895 |
| 9/13/2010 12:49:01 | 25.549 | 9/14/2010 10:29:01 | 25.895 |
| 9/13/2010 13:09:01 | 25.549 | 9/14/2010 10:49:01 | 25.895 |
| 9/13/2010 13:29:01 | 25.611 | 9/14/2010 11:09:01 | 25.832 |
| 9/13/2010 13:49:01 | 25.611 | 9/14/2010 11:29:01 | 25.832 |
| 9/13/2010 14:09:01 | 25.611 | 9/14/2010 11:49:01 | 25.832 |
| 9/13/2010 14:29:01 | 25.611 | 9/14/2010 12:09:01 | 25.832 |
| 9/13/2010 14:49:01 | 25.611 | 9/14/2010 12:29:01 | 25.832 |
| 9/13/2010 15:09:01 | 25.674 | 9/14/2010 12:49:01 | 25.77  |
| 9/13/2010 15:29:01 | 25.674 | 9/14/2010 13:09:01 | 25.77  |
| 9/13/2010 15:49:01 | 25.674 | 9/14/2010 13:29:01 | 25.77  |
| 9/13/2010 16:09:01 | 25.736 | 9/14/2010 13:49:01 | 25.77  |
| 9/13/2010 16:29:01 | 25.736 | 9/14/2010 14:09:01 | 25.77  |
| 9/13/2010 16:49:01 | 25.799 | 9/14/2010 14:29:01 | 25.77  |
| 9/13/2010 17:09:01 | 25.799 | 9/14/2010 14:49:01 | 25.77  |
| 9/13/2010 17:29:01 | 25.861 | 9/14/2010 15:09:01 | 25.77  |
| 9/13/2010 17:49:01 | 25.924 | 9/14/2010 15:29:01 | 25.707 |
| 9/13/2010 18:09:01 | 25.924 | 9/14/2010 15:49:01 | 25.707 |
| 9/13/2010 18:29:01 | 25.986 | 9/14/2010 16:09:01 | 25.707 |
| 9/13/2010 18:49:01 | 25.986 | 9/14/2010 16:29:01 | 25.77  |
| 9/13/2010 19:09:01 | 26.049 | 9/14/2010 16:49:01 | 25.707 |
| 9/13/2010 19:29:01 | 26.111 | 9/14/2010 17:09:01 | 25.77  |
| 9/13/2010 19:49:01 | 26.111 | 9/14/2010 17:29:01 | 25.77  |
| 9/13/2010 20:09:01 | 26.111 | 9/14/2010 17:49:01 | 25.77  |
| 9/13/2010 20:29:01 | 26.174 | 9/14/2010 18:09:01 | 25.77  |
| 9/13/2010 20:49:01 | 26.174 | 9/14/2010 18:29:01 | 25.77  |
| 9/13/2010 21:09:01 | 26.174 | 9/14/2010 18:49:01 | 25.77  |
| 9/13/2010 21:29:01 | 26.236 | 9/14/2010 19:09:01 | 25.77  |
| 9/13/2010 21:49:01 | 26.236 | 9/14/2010 19:29:01 | 25.77  |
| 9/13/2010 22:09:01 | 26.236 | 9/14/2010 19:49:01 | 25.832 |
| 9/13/2010 22:29:01 | 26.236 | 9/14/2010 20:09:01 | 25.832 |
| 9/13/2010 22:49:01 | 26.236 | 9/14/2010 20:29:01 | 25.832 |
| 9/13/2010 23:09:01 | 26.236 | 9/14/2010 20:49:01 | 25.832 |
| 9/13/2010 23:29:01 | 26.236 | 9/14/2010 21:09:01 | 25.832 |
| 9/13/2010 23:49:01 | 26.236 | 9/14/2010 21:29:01 | 25.895 |
| 9/14/2010 00:09:01 | 26.236 | 9/14/2010 21:49:01 | 25.895 |
| 9/14/2010 00:29:01 | 26.236 | 9/14/2010 22:09:01 | 25.895 |
| 9/14/2010 00:49:01 | 26.236 | 9/14/2010 22:29:01 | 25.895 |
| 9/14/2010 01:09:01 | 26.236 | 9/14/2010 22:49:01 | 25.957 |
| 9/14/2010 01:29:01 | 26.236 | 9/14/2010 23:09:01 | 25.957 |
| 9/14/2010 01:49:01 | 26.236 | 9/14/2010 23:29:01 | 25.957 |

|                    |        |                    |        |
|--------------------|--------|--------------------|--------|
| 9/14/2010 02:09:01 | 26.236 | 9/14/2010 23:49:01 | 25.957 |
| 9/14/2010 02:29:01 | 26.174 | 9/15/2010 00:09:01 | 25.957 |
| 9/14/2010 02:49:01 | 26.174 | 9/15/2010 00:29:01 | 26.02  |
| 9/14/2010 03:09:01 | 26.174 | 9/15/2010 00:49:01 | 26.02  |
| 9/14/2010 03:29:01 | 26.174 | 9/15/2010 01:09:01 | 26.02  |
| 9/14/2010 03:49:01 | 26.174 | 9/15/2010 01:29:01 | 26.02  |
| 9/14/2010 04:09:01 | 26.111 | 9/15/2010 01:49:01 | 26.02  |
| 9/14/2010 04:29:01 | 26.111 | 9/15/2010 02:09:01 | 26.02  |
| 9/14/2010 04:49:01 | 26.111 | 9/15/2010 02:29:01 | 26.02  |
| 9/14/2010 05:09:01 | 26.111 | 9/15/2010 02:49:01 | 26.02  |
| 9/14/2010 05:29:01 | 26.049 | 9/15/2010 03:09:01 | 26.02  |
| 9/14/2010 05:49:01 | 26.049 | 9/15/2010 03:29:01 | 26.02  |
| 9/14/2010 06:09:01 | 26.049 | 9/15/2010 03:49:01 | 26.02  |
| 9/14/2010 06:29:01 | 25.986 | 9/15/2010 04:09:01 | 26.02  |
| 9/14/2010 06:49:01 | 25.986 | 9/15/2010 04:29:01 | 26.02  |
| 9/14/2010 07:09:01 | 25.986 | 9/15/2010 04:49:01 | 26.02  |
| 9/14/2010 07:29:01 | 25.924 | 9/15/2010 05:09:01 | 26.02  |
| 9/14/2010 07:49:01 | 25.924 | 9/15/2010 05:29:01 | 26.02  |
| 9/14/2010 08:09:01 | 25.924 | 9/15/2010 05:49:01 | 26.02  |
| 9/14/2010 08:29:01 | 25.861 | 9/15/2010 06:09:01 | 25.957 |
| 9/14/2010 08:49:01 | 25.861 | 9/15/2010 06:29:01 | 25.957 |
| 9/14/2010 09:09:01 | 25.861 | 9/15/2010 06:49:01 | 25.957 |
| 9/14/2010 09:29:01 | 25.799 | 9/15/2010 07:09:01 | 25.957 |
| 9/14/2010 09:49:01 | 25.799 | 9/15/2010 07:29:01 | 25.957 |
| 9/14/2010 10:09:01 | 25.799 | 9/15/2010 07:49:01 | 25.957 |
| 9/14/2010 10:29:01 | 25.736 | 9/15/2010 08:09:01 | 25.895 |
| 9/14/2010 10:49:01 | 25.736 | 9/15/2010 08:29:01 | 25.895 |
| 9/14/2010 11:09:01 | 25.736 | 9/15/2010 08:49:01 | 25.895 |
| 9/14/2010 11:29:01 | 25.674 | 9/15/2010 09:09:01 | 25.895 |
| 9/14/2010 11:49:01 | 25.674 | 9/15/2010 09:29:01 | 25.832 |
| 9/14/2010 12:09:01 | 25.674 | 9/15/2010 09:49:01 | 25.832 |
| 9/14/2010 12:29:01 | 25.674 | 9/15/2010 10:09:01 | 25.832 |
| 9/14/2010 12:49:01 | 25.674 | 9/15/2010 10:29:01 | 25.832 |
| 9/14/2010 13:09:01 | 25.674 | 9/15/2010 10:49:01 | 25.77  |
| 9/14/2010 13:29:01 | 25.674 | 9/15/2010 11:09:01 | 25.77  |
| 9/14/2010 13:49:01 | 25.674 | 9/15/2010 11:29:01 | 25.77  |
| 9/14/2010 14:09:01 | 25.674 | 9/15/2010 11:49:01 | 25.77  |
| 9/14/2010 14:29:01 | 25.674 | 9/15/2010 12:09:01 | 25.707 |
| 9/14/2010 14:49:01 | 25.674 | 9/15/2010 12:29:01 | 25.707 |
| 9/14/2010 15:09:01 | 25.736 | 9/15/2010 12:49:01 | 25.707 |
| 9/14/2010 15:29:01 | 25.736 | 9/15/2010 13:09:01 | 25.707 |
| 9/14/2010 15:49:01 | 25.799 | 9/15/2010 13:29:01 | 25.645 |
| 9/14/2010 16:09:01 | 25.799 | 9/15/2010 13:49:01 | 25.645 |
| 9/14/2010 16:29:01 | 25.861 | 9/15/2010 14:09:01 | 25.645 |
| 9/14/2010 16:49:01 | 25.861 | 9/15/2010 14:29:01 | 25.645 |
| 9/14/2010 17:09:01 | 25.924 | 9/15/2010 14:49:01 | 25.582 |
| 9/14/2010 17:29:01 | 25.986 | 9/15/2010 15:09:01 | 25.582 |
| 9/14/2010 17:49:01 | 25.986 | 9/15/2010 15:29:01 | 25.582 |
| 9/14/2010 18:09:01 | 26.049 | 9/15/2010 15:49:01 | 25.582 |
| 9/14/2010 18:29:01 | 26.111 | 9/15/2010 16:09:01 | 25.582 |

|                    |        |                    |        |
|--------------------|--------|--------------------|--------|
| 9/14/2010 18:49:01 | 26.111 | 9/15/2010 16:29:01 | 25.582 |
| 9/14/2010 19:09:01 | 26.174 | 9/15/2010 16:49:01 | 25.582 |
| 9/14/2010 19:29:01 | 26.174 | 9/15/2010 17:09:01 | 25.582 |
| 9/14/2010 19:49:01 | 26.236 | 9/15/2010 17:29:01 | 25.582 |
| 9/14/2010 20:09:01 | 26.236 | 9/15/2010 17:49:01 | 25.582 |
| 9/14/2010 20:29:01 | 26.299 | 9/15/2010 18:09:01 | 25.582 |
| 9/14/2010 20:49:01 | 26.299 | 9/15/2010 18:29:01 | 25.582 |
| 9/14/2010 21:09:01 | 26.299 | 9/15/2010 18:49:01 | 25.582 |
| 9/14/2010 21:29:01 | 26.299 | 9/15/2010 19:09:01 | 25.582 |
| 9/14/2010 21:49:01 | 26.361 | 9/15/2010 19:29:01 | 25.582 |
| 9/14/2010 22:09:01 | 26.361 | 9/15/2010 19:49:01 | 25.582 |
| 9/14/2010 22:29:01 | 26.361 | 9/15/2010 20:09:01 | 25.645 |
| 9/14/2010 22:49:01 | 26.361 | 9/15/2010 20:29:01 | 25.645 |
| 9/14/2010 23:09:01 | 26.361 | 9/15/2010 20:49:01 | 25.645 |
| 9/14/2010 23:29:01 | 26.361 | 9/15/2010 21:09:01 | 25.645 |
| 9/14/2010 23:49:01 | 26.361 | 9/15/2010 21:29:01 | 25.707 |
| 9/15/2010 00:09:01 | 26.361 | 9/15/2010 21:49:01 | 25.707 |
| 9/15/2010 00:29:01 | 26.299 | 9/15/2010 22:09:01 | 25.707 |
| 9/15/2010 00:49:01 | 26.299 | 9/15/2010 22:29:01 | 25.707 |
| 9/15/2010 01:09:01 | 26.299 | 9/15/2010 22:49:01 | 25.707 |
| 9/15/2010 01:29:01 | 26.299 | 9/15/2010 23:09:01 | 25.707 |
| 9/15/2010 01:49:01 | 26.299 | 9/15/2010 23:29:01 | 25.77  |
| 9/15/2010 02:09:01 | 26.236 | 9/15/2010 23:49:01 | 25.77  |
| 9/15/2010 02:29:01 | 26.236 | 9/16/2010 00:09:01 | 25.77  |
| 9/15/2010 02:49:01 | 26.236 | 9/16/2010 00:29:01 | 25.77  |
| 9/15/2010 03:09:01 | 26.174 | 9/16/2010 00:49:01 | 25.77  |
| 9/15/2010 03:29:01 | 26.174 | 9/16/2010 01:09:01 | 25.77  |
| 9/15/2010 03:49:01 | 26.174 | 9/16/2010 01:29:01 | 25.77  |
| 9/15/2010 04:09:01 | 26.111 | 9/16/2010 01:49:01 | 25.77  |
| 9/15/2010 04:29:01 | 26.111 | 9/16/2010 02:09:01 | 25.832 |
| 9/15/2010 04:49:01 | 26.111 | 9/16/2010 02:29:01 | 25.77  |
| 9/15/2010 05:09:01 | 26.049 | 9/16/2010 02:49:01 | 25.832 |
| 9/15/2010 05:29:01 | 26.049 | 9/16/2010 03:09:01 | 25.832 |
| 9/15/2010 05:49:01 | 25.986 | 9/16/2010 03:29:01 | 25.832 |
| 9/15/2010 06:09:01 | 25.986 | 9/16/2010 03:49:01 | 25.832 |
| 9/15/2010 06:29:01 | 25.986 | 9/16/2010 04:09:01 | 25.832 |
| 9/15/2010 06:49:01 | 25.924 | 9/16/2010 04:29:01 | 25.832 |
| 9/15/2010 07:09:01 | 25.924 | 9/16/2010 04:49:01 | 25.77  |
| 9/15/2010 07:29:01 | 25.861 | 9/16/2010 05:09:01 | 25.832 |
| 9/15/2010 07:49:01 | 25.861 | 9/16/2010 05:29:01 | 25.77  |
| 9/15/2010 08:09:01 | 25.799 | 9/16/2010 05:49:01 | 25.77  |
| 9/15/2010 08:29:01 | 25.799 | 9/16/2010 06:09:01 | 25.77  |
| 9/15/2010 08:49:01 | 25.736 | 9/16/2010 06:29:01 | 25.77  |
| 9/15/2010 09:09:01 | 25.736 | 9/16/2010 06:49:01 | 25.77  |
| 9/15/2010 09:29:01 | 25.674 | 9/16/2010 07:09:01 | 25.77  |
| 9/15/2010 09:49:01 | 25.674 | 9/16/2010 07:29:01 | 25.77  |
| 9/15/2010 10:09:01 | 25.611 | 9/16/2010 07:49:01 | 25.707 |
| 9/15/2010 10:29:01 | 25.611 | 9/16/2010 08:09:01 | 25.707 |
| 9/15/2010 10:49:01 | 25.611 | 9/16/2010 08:29:01 | 25.707 |
| 9/15/2010 11:09:01 | 25.549 | 9/16/2010 08:49:01 | 25.707 |

|                    |        |                    |        |
|--------------------|--------|--------------------|--------|
| 9/15/2010 11:29:01 | 25.549 | 9/16/2010 09:09:01 | 25.707 |
| 9/15/2010 11:49:01 | 25.486 | 9/16/2010 09:29:01 | 25.707 |
| 9/15/2010 12:09:01 | 25.486 | 9/16/2010 09:49:01 | 25.645 |
| 9/15/2010 12:29:01 | 25.486 | 9/16/2010 10:09:01 | 25.645 |
| 9/15/2010 12:49:01 | 25.486 | 9/16/2010 10:29:01 | 25.645 |
| 9/15/2010 13:09:01 | 25.486 | 9/16/2010 10:49:01 | 25.582 |
| 9/15/2010 13:29:01 | 25.486 | 9/16/2010 11:09:01 | 25.582 |
| 9/15/2010 13:49:01 | 25.486 | 9/16/2010 11:29:01 | 25.582 |
| 9/15/2010 14:09:01 | 25.486 | 9/16/2010 11:49:01 | 25.582 |
| 9/15/2010 14:29:01 | 25.486 | 9/16/2010 12:09:01 | 25.52  |
| 9/15/2010 14:49:01 | 25.486 | 9/16/2010 12:29:01 | 25.52  |
| 9/15/2010 15:09:01 | 25.549 | 9/16/2010 12:49:01 | 25.52  |
| 9/15/2010 15:29:01 | 25.549 | 9/16/2010 13:09:01 | 25.52  |
| 9/15/2010 15:49:01 | 25.549 | 9/16/2010 13:29:01 | 25.457 |
| 9/15/2010 16:09:01 | 25.611 | 9/16/2010 13:49:01 | 25.457 |
| 9/15/2010 16:29:01 | 25.674 | 9/16/2010 14:09:01 | 25.457 |
| 9/15/2010 16:49:01 | 25.674 | 9/16/2010 14:29:01 | 25.457 |
| 9/15/2010 17:09:01 | 25.736 | 9/16/2010 14:49:01 | 25.457 |
| 9/15/2010 17:29:01 | 25.799 | 9/16/2010 15:09:01 | 25.457 |
| 9/15/2010 17:49:01 | 25.799 | 9/16/2010 15:29:01 | 25.395 |
| 9/15/2010 18:09:01 | 25.861 | 9/16/2010 15:49:01 | 25.395 |
| 9/15/2010 18:29:01 | 25.924 | 9/16/2010 16:09:01 | 25.395 |
| 9/15/2010 18:49:01 | 25.924 | 9/16/2010 16:29:01 | 25.395 |
| 9/15/2010 19:09:01 | 25.986 | 9/16/2010 16:49:01 | 25.395 |
| 9/15/2010 19:29:01 | 25.986 | 9/16/2010 17:09:01 | 25.395 |
| 9/15/2010 19:49:01 | 26.049 | 9/16/2010 17:29:01 | 25.395 |
| 9/15/2010 20:09:01 | 26.049 | 9/16/2010 17:49:01 | 25.395 |
| 9/15/2010 20:29:01 | 26.111 | 9/16/2010 18:09:01 | 25.457 |
| 9/15/2010 20:49:01 | 26.111 | 9/16/2010 18:29:01 | 25.457 |
| 9/15/2010 21:09:01 | 26.111 | 9/16/2010 18:49:01 | 25.457 |
| 9/15/2010 21:29:01 | 26.174 | 9/16/2010 19:09:01 | 25.457 |
| 9/15/2010 21:49:01 | 26.174 | 9/16/2010 19:29:01 | 25.457 |
| 9/15/2010 22:09:01 | 26.174 | 9/16/2010 19:49:01 | 25.457 |
| 9/15/2010 22:29:01 | 26.174 | 9/16/2010 20:09:01 | 25.52  |
| 9/15/2010 22:49:01 | 26.174 | 9/16/2010 20:29:01 | 25.52  |
| 9/15/2010 23:09:01 | 26.174 | 9/16/2010 20:49:01 | 25.52  |
| 9/15/2010 23:29:01 | 26.174 | 9/16/2010 21:09:01 | 25.52  |
| 9/15/2010 23:49:01 | 26.174 | 9/16/2010 21:29:01 | 25.582 |
| 9/16/2010 00:09:01 | 26.174 | 9/16/2010 21:49:01 | 25.582 |
| 9/16/2010 00:29:01 | 26.174 | 9/16/2010 22:09:01 | 25.582 |
| 9/16/2010 00:49:01 | 26.174 | 9/16/2010 22:29:01 | 25.582 |
| 9/16/2010 01:09:01 | 26.174 | 9/16/2010 22:49:01 | 25.645 |
| 9/16/2010 01:29:01 | 26.174 | 9/16/2010 23:09:01 | 25.645 |
| 9/16/2010 01:49:01 | 26.111 | 9/16/2010 23:29:01 | 25.645 |
| 9/16/2010 02:09:01 | 26.111 | 9/16/2010 23:49:01 | 25.645 |
| 9/16/2010 02:29:01 | 26.111 | 9/17/2010 00:09:01 | 25.707 |
| 9/16/2010 02:49:01 | 26.111 | 9/17/2010 00:29:01 | 25.707 |
| 9/16/2010 03:09:01 | 26.049 | 9/17/2010 00:49:01 | 25.707 |
| 9/16/2010 03:29:01 | 26.049 | 9/17/2010 01:09:01 | 25.707 |
| 9/16/2010 03:49:01 | 26.049 | 9/17/2010 01:29:01 | 25.707 |



|                    |        |                    |        |
|--------------------|--------|--------------------|--------|
| 9/16/2010 04:09:01 | 25.986 | 9/17/2010 01:49:01 | 25.707 |
| 9/16/2010 04:29:01 | 25.986 | 9/17/2010 02:09:01 | 25.707 |
| 9/16/2010 04:49:01 | 25.986 | 9/17/2010 02:29:01 | 25.707 |
| 9/16/2010 05:09:01 | 25.924 | 9/17/2010 02:49:01 | 25.77  |
| 9/16/2010 05:29:01 | 25.924 | 9/17/2010 03:09:01 | 25.77  |
| 9/16/2010 05:49:01 | 25.861 | 9/17/2010 03:29:01 | 25.707 |
| 9/16/2010 06:09:01 | 25.861 | 9/17/2010 03:49:01 | 25.707 |
| 9/16/2010 06:29:01 | 25.861 | 9/17/2010 04:09:01 | 25.707 |
| 9/16/2010 06:49:01 | 25.799 | 9/17/2010 04:29:01 | 25.77  |
| 9/16/2010 07:09:01 | 25.799 | 9/17/2010 04:49:01 | 25.707 |
| 9/16/2010 07:29:01 | 25.736 | 9/17/2010 05:09:01 | 25.77  |
| 9/16/2010 07:49:01 | 25.736 | 9/17/2010 05:29:01 | 25.707 |
| 9/16/2010 08:09:01 | 25.674 | 9/17/2010 05:49:01 | 25.707 |
| 9/16/2010 08:29:01 | 25.674 | 9/17/2010 06:09:01 | 25.707 |
| 9/16/2010 08:49:01 | 25.674 | 9/17/2010 06:29:01 | 25.707 |
| 9/16/2010 09:09:01 | 25.611 | 9/17/2010 06:49:01 | 25.707 |
| 9/16/2010 09:29:01 | 25.611 | 9/17/2010 07:09:01 | 25.707 |
| 9/16/2010 09:49:01 | 25.549 | 9/17/2010 07:29:01 | 25.707 |
| 9/16/2010 10:09:01 | 25.549 | 9/17/2010 07:49:01 | 25.645 |
| 9/16/2010 10:29:01 | 25.486 | 9/17/2010 08:09:01 | 25.645 |
| 9/16/2010 10:49:01 | 25.486 | 9/17/2010 08:29:01 | 25.645 |
| 9/16/2010 11:09:01 | 25.424 | 9/17/2010 08:49:01 | 25.645 |
| 9/16/2010 11:29:01 | 25.424 | 9/17/2010 09:09:01 | 25.645 |
| 9/16/2010 11:49:01 | 25.424 | 9/17/2010 09:29:01 | 25.582 |
| 9/16/2010 12:09:01 | 25.424 | 9/17/2010 09:49:01 | 25.582 |
| 9/16/2010 12:29:01 | 25.361 | 9/17/2010 10:09:01 | 25.582 |
| 9/16/2010 12:49:01 | 25.361 | 9/17/2010 10:29:01 | 25.582 |
| 9/16/2010 13:09:01 | 25.361 | 9/17/2010 10:49:01 | 25.52  |
| 9/16/2010 13:29:01 | 25.361 | 9/17/2010 11:09:01 | 25.52  |
| 9/16/2010 13:49:01 | 25.361 | 9/17/2010 11:29:01 | 25.52  |
| 9/16/2010 14:09:01 | 25.361 | 9/17/2010 11:49:01 | 25.52  |
| 9/16/2010 14:29:01 | 25.424 | 9/17/2010 12:09:01 | 25.457 |
| 9/16/2010 14:49:01 | 25.424 | 9/17/2010 12:29:01 | 25.457 |
| 9/16/2010 15:09:01 | 25.424 | 9/17/2010 12:49:01 | 25.457 |
| 9/16/2010 15:29:01 | 25.486 | 9/17/2010 13:09:01 | 25.457 |
| 9/16/2010 15:49:01 | 25.486 | 9/17/2010 13:29:01 | 25.395 |
| 9/16/2010 16:09:01 | 25.549 | 9/17/2010 13:49:01 | 25.395 |
| 9/16/2010 16:29:01 | 25.549 | 9/17/2010 14:09:01 | 25.395 |
| 9/16/2010 16:49:01 | 25.611 | 9/17/2010 14:29:01 | 25.395 |
| 9/16/2010 17:09:01 | 25.674 | 9/17/2010 14:49:01 | 25.395 |
| 9/16/2010 17:29:01 | 25.736 | 9/17/2010 15:09:01 | 25.395 |
| 9/16/2010 17:49:01 | 25.736 | 9/17/2010 15:29:01 | 25.395 |
| 9/16/2010 18:09:01 | 25.799 | 9/17/2010 15:49:01 | 25.395 |
| 9/16/2010 18:29:01 | 25.861 | 9/17/2010 16:09:01 | 25.395 |
| 9/16/2010 18:49:01 | 25.924 | 9/17/2010 16:29:01 | 25.332 |
| 9/16/2010 19:09:01 | 25.924 | 9/17/2010 16:49:01 | 25.395 |
| 9/16/2010 19:29:01 | 25.986 | 9/17/2010 17:09:01 | 25.395 |
| 9/16/2010 19:49:01 | 25.986 | 9/17/2010 17:29:01 | 25.395 |
| 9/16/2010 20:09:01 | 26.049 | 9/17/2010 17:49:01 | 25.395 |
| 9/16/2010 20:29:01 | 26.049 | 9/17/2010 18:09:01 | 25.395 |

|                    |        |                    |        |
|--------------------|--------|--------------------|--------|
| 9/16/2010 20:49:01 | 26.111 | 9/17/2010 18:29:01 | 25.395 |
| 9/16/2010 21:09:01 | 26.111 | 9/17/2010 18:49:01 | 25.395 |
| 9/16/2010 21:29:01 | 26.111 | 9/17/2010 19:09:01 | 25.457 |
| 9/16/2010 21:49:01 | 26.174 | 9/17/2010 19:29:01 | 25.457 |
| 9/16/2010 22:09:01 | 26.174 | 9/17/2010 19:49:01 | 25.457 |
| 9/16/2010 22:29:01 | 26.174 | 9/17/2010 20:09:01 | 25.457 |
| 9/16/2010 22:49:01 | 26.174 | 9/17/2010 20:29:01 | 25.52  |
| 9/16/2010 23:09:01 | 26.174 | 9/17/2010 20:49:01 | 25.52  |
| 9/16/2010 23:29:01 | 26.174 | 9/17/2010 21:09:01 | 25.52  |
| 9/16/2010 23:49:01 | 26.174 | 9/17/2010 21:29:01 | 25.582 |
| 9/17/2010 00:09:01 | 26.174 | 9/17/2010 21:49:01 | 25.582 |
| 9/17/2010 00:29:01 | 26.174 | 9/17/2010 22:09:01 | 25.582 |
| 9/17/2010 00:49:01 | 26.174 | 9/17/2010 22:29:01 | 25.582 |
| 9/17/2010 01:09:01 | 26.111 | 9/17/2010 22:49:01 | 25.645 |
| 9/17/2010 01:29:01 | 26.111 | 9/17/2010 23:09:01 | 25.645 |
| 9/17/2010 01:49:01 | 26.111 | 9/17/2010 23:29:01 | 25.645 |
| 9/17/2010 02:09:01 | 26.111 | 9/17/2010 23:49:01 | 25.707 |
| 9/17/2010 02:29:01 | 26.049 | 9/18/2010 00:09:01 | 25.707 |
| 9/17/2010 02:49:01 | 26.049 | 9/18/2010 00:29:01 | 25.707 |
| 9/17/2010 03:09:01 | 26.049 | 9/18/2010 00:49:01 | 25.77  |
| 9/17/2010 03:29:01 | 26.049 | 9/18/2010 01:09:01 | 25.77  |
| 9/17/2010 03:49:01 | 25.986 | 9/18/2010 01:29:01 | 25.77  |
| 9/17/2010 04:09:01 | 25.986 | 9/18/2010 01:49:01 | 25.77  |
| 9/17/2010 04:29:01 | 25.924 | 9/18/2010 02:09:01 | 25.77  |
| 9/17/2010 04:49:01 | 25.924 | 9/18/2010 02:29:01 | 25.832 |
| 9/17/2010 05:09:01 | 25.861 | 9/18/2010 02:49:01 | 25.832 |
| 9/17/2010 05:29:01 | 25.861 | 9/18/2010 03:09:01 | 25.832 |
| 9/17/2010 05:49:01 | 25.861 | 9/18/2010 03:29:01 | 25.832 |
| 9/17/2010 06:09:01 | 25.799 | 9/18/2010 03:49:01 | 25.832 |
| 9/17/2010 06:29:01 | 25.799 | 9/18/2010 04:09:01 | 25.832 |
| 9/17/2010 06:49:01 | 25.736 | 9/18/2010 04:29:01 | 25.832 |
| 9/17/2010 07:09:01 | 25.736 | 9/18/2010 04:49:01 | 25.832 |
| 9/17/2010 07:29:01 | 25.674 | 9/18/2010 05:09:01 | 25.895 |
| 9/17/2010 07:49:01 | 25.674 | 9/18/2010 05:29:01 | 25.895 |
| 9/17/2010 08:09:01 | 25.611 | 9/18/2010 05:49:01 | 25.895 |
| 9/17/2010 08:29:01 | 25.611 | 9/18/2010 06:09:01 | 25.895 |
| 9/17/2010 08:49:01 | 25.549 | 9/18/2010 06:29:01 | 25.895 |
| 9/17/2010 09:09:01 | 25.549 | 9/18/2010 06:49:01 | 25.895 |
| 9/17/2010 09:29:01 | 25.486 | 9/18/2010 07:09:01 | 25.895 |
| 9/17/2010 09:49:01 | 25.486 | 9/18/2010 07:29:01 | 25.895 |
| 9/17/2010 10:09:01 | 25.424 | 9/18/2010 07:49:01 | 25.832 |
| 9/17/2010 10:29:01 | 25.424 | 9/18/2010 08:09:01 | 25.832 |
| 9/17/2010 10:49:01 | 25.361 | 9/18/2010 08:29:01 | 25.832 |
| 9/17/2010 11:09:01 | 25.361 | 9/18/2010 08:49:01 | 25.832 |
| 9/17/2010 11:29:01 | 25.361 | 9/18/2010 09:09:01 | 25.832 |
| 9/17/2010 11:49:01 | 25.299 | 9/18/2010 09:29:01 | 25.832 |
| 9/17/2010 12:09:01 | 25.299 | 9/18/2010 09:49:01 | 25.832 |
| 9/17/2010 12:29:01 | 25.299 | 9/18/2010 10:09:01 | 25.832 |
| 9/17/2010 12:49:01 | 25.299 | 9/18/2010 10:29:01 | 25.832 |
| 9/17/2010 13:09:01 | 25.299 | 9/18/2010 10:49:01 | 25.832 |

|                    |        |                    |        |
|--------------------|--------|--------------------|--------|
| 9/17/2010 13:29:01 | 25.299 | 9/18/2010 11:09:01 | 25.77  |
| 9/17/2010 13:49:01 | 25.299 | 9/18/2010 11:29:01 | 25.77  |
| 9/17/2010 14:09:01 | 25.299 | 9/18/2010 11:49:01 | 25.77  |
| 9/17/2010 14:29:01 | 25.299 | 9/18/2010 12:09:01 | 25.77  |
| 9/17/2010 14:49:01 | 25.299 | 9/18/2010 12:29:01 | 25.77  |
| 9/17/2010 15:09:01 | 25.361 | 9/18/2010 12:49:01 | 25.707 |
| 9/17/2010 15:29:01 | 25.361 | 9/18/2010 13:09:01 | 25.707 |
| 9/17/2010 15:49:01 | 25.424 | 9/18/2010 13:29:01 | 25.707 |
| 9/17/2010 16:09:01 | 25.424 | 9/18/2010 13:49:01 | 25.707 |
| 9/17/2010 16:29:01 | 25.486 | 9/18/2010 14:09:01 | 25.707 |
| 9/17/2010 16:49:01 | 25.549 | 9/18/2010 14:29:01 | 25.707 |
| 9/17/2010 17:09:01 | 25.611 | 9/18/2010 14:49:01 | 25.707 |
| 9/17/2010 17:29:01 | 25.611 | 9/18/2010 15:09:01 | 25.707 |
| 9/17/2010 17:49:01 | 25.674 | 9/18/2010 15:29:01 | 25.707 |
| 9/17/2010 18:09:01 | 25.736 | 9/18/2010 15:49:01 | 25.707 |
| 9/17/2010 18:29:01 | 25.799 | 9/18/2010 16:09:01 | 25.707 |
| 9/17/2010 18:49:01 | 25.861 | 9/18/2010 16:29:01 | 25.707 |
| 9/17/2010 19:09:01 | 25.861 | 9/18/2010 16:49:01 | 25.707 |
| 9/17/2010 19:29:01 | 25.924 | 9/18/2010 17:09:01 | 25.707 |
| 9/17/2010 19:49:01 | 25.986 | 9/18/2010 17:29:01 | 25.707 |
| 9/17/2010 20:09:01 | 25.986 | 9/18/2010 17:49:01 | 25.707 |
| 9/17/2010 20:29:01 | 26.049 | 9/18/2010 18:09:01 | 25.77  |
| 9/17/2010 20:49:01 | 26.049 | 9/18/2010 18:29:01 | 25.77  |
| 9/17/2010 21:09:01 | 26.111 | 9/18/2010 18:49:01 | 25.77  |
| 9/17/2010 21:29:01 | 26.111 | 9/18/2010 19:09:01 | 25.77  |
| 9/17/2010 21:49:01 | 26.174 | 9/18/2010 19:29:01 | 25.832 |
| 9/17/2010 22:09:01 | 26.174 | 9/18/2010 19:49:01 | 25.832 |
| 9/17/2010 22:29:01 | 26.174 | 9/18/2010 20:09:01 | 25.832 |
| 9/17/2010 22:49:01 | 26.236 | 9/18/2010 20:29:01 | 25.832 |
| 9/17/2010 23:09:01 | 26.236 | 9/18/2010 20:49:01 | 25.895 |
| 9/17/2010 23:29:01 | 26.236 | 9/18/2010 21:09:01 | 25.895 |
| 9/17/2010 23:49:01 | 26.236 | 9/18/2010 21:29:01 | 25.895 |
| 9/18/2010 00:09:01 | 26.236 | 9/18/2010 21:49:01 | 25.895 |
| 9/18/2010 00:29:01 | 26.236 | 9/18/2010 22:09:01 | 25.957 |
| 9/18/2010 00:49:01 | 26.299 | 9/18/2010 22:29:01 | 25.957 |
| 9/18/2010 01:09:01 | 26.236 | 9/18/2010 22:49:01 | 25.957 |
| 9/18/2010 01:29:01 | 26.236 | 9/18/2010 23:09:01 | 26.02  |
| 9/18/2010 01:49:01 | 26.236 | 9/18/2010 23:29:01 | 26.02  |
| 9/18/2010 02:09:01 | 26.236 | 9/18/2010 23:49:01 | 26.02  |
| 9/18/2010 02:29:01 | 26.236 | 9/19/2010 00:09:01 | 26.02  |
| 9/18/2010 02:49:01 | 26.236 | 9/19/2010 00:29:01 | 26.082 |
| 9/18/2010 03:09:01 | 26.236 | 9/19/2010 00:49:01 | 26.082 |
| 9/18/2010 03:29:01 | 26.236 | 9/19/2010 01:09:01 | 26.082 |
| 9/18/2010 03:49:01 | 26.236 | 9/19/2010 01:29:01 | 26.082 |
| 9/18/2010 04:09:01 | 26.236 | 9/19/2010 01:49:01 | 26.082 |
| 9/18/2010 04:29:01 | 26.174 | 9/19/2010 02:09:01 | 26.082 |
| 9/18/2010 04:49:01 | 26.174 | 9/19/2010 02:29:01 | 26.082 |
| 9/18/2010 05:09:01 | 26.174 | 9/19/2010 02:49:01 | 26.082 |
| 9/18/2010 05:29:01 | 26.111 | 9/19/2010 03:09:01 | 26.082 |
| 9/18/2010 05:49:01 | 26.111 | 9/19/2010 03:29:01 | 26.082 |

|                    |        |                    |        |
|--------------------|--------|--------------------|--------|
| 9/18/2010 06:09:01 | 26.111 | 9/19/2010 03:49:01 | 26.082 |
| 9/18/2010 06:29:01 | 26.111 | 9/19/2010 04:09:01 | 26.082 |
| 9/18/2010 06:49:01 | 26.049 | 9/19/2010 04:29:01 | 26.082 |
| 9/18/2010 07:09:01 | 26.049 | 9/19/2010 04:49:01 | 26.082 |
| 9/18/2010 07:29:01 | 26.049 | 9/19/2010 05:09:01 | 26.082 |
| 9/18/2010 07:49:01 | 25.986 | 9/19/2010 05:29:01 | 26.082 |
| 9/18/2010 08:09:01 | 25.986 | 9/19/2010 05:49:01 | 26.082 |
| 9/18/2010 08:29:01 | 25.924 | 9/19/2010 06:09:01 | 26.082 |
| 9/18/2010 08:49:01 | 25.924 | 9/19/2010 06:29:01 | 26.082 |
| 9/18/2010 09:09:01 | 25.924 | 9/19/2010 06:49:01 | 26.082 |
| 9/18/2010 09:29:01 | 25.861 | 9/19/2010 07:09:01 | 26.082 |
| 9/18/2010 09:49:01 | 25.861 | 9/19/2010 07:29:01 | 26.082 |
| 9/18/2010 10:09:01 | 25.799 | 9/19/2010 07:49:01 | 26.02  |
| 9/18/2010 10:29:01 | 25.799 | 9/19/2010 08:09:01 | 26.02  |
| 9/18/2010 10:49:01 | 25.799 | 9/19/2010 08:29:01 | 26.02  |
| 9/18/2010 11:09:01 | 25.736 | 9/19/2010 08:49:01 | 26.02  |
| 9/18/2010 11:29:01 | 25.736 | 9/19/2010 09:09:01 | 26.02  |
| 9/18/2010 11:49:01 | 25.736 | 9/19/2010 09:29:01 | 26.02  |
| 9/18/2010 12:09:01 | 25.736 | 9/19/2010 09:49:01 | 25.957 |
| 9/18/2010 12:29:01 | 25.736 | 9/19/2010 10:09:01 | 25.957 |
| 9/18/2010 12:49:01 | 25.674 | 9/19/2010 10:29:01 | 25.957 |
| 9/18/2010 13:09:01 | 25.674 | 9/19/2010 10:49:01 | 25.957 |
| 9/18/2010 13:29:01 | 25.674 | 9/19/2010 11:09:01 | 25.895 |
| 9/18/2010 13:49:01 | 25.736 | 9/19/2010 11:29:01 | 25.895 |
| 9/18/2010 14:09:01 | 25.736 | 9/19/2010 11:49:01 | 25.895 |
| 9/18/2010 14:29:01 | 25.736 | 9/19/2010 12:09:01 | 25.895 |
| 9/18/2010 14:49:01 | 25.736 | 9/19/2010 12:29:01 | 25.832 |
| 9/18/2010 15:09:01 | 25.799 | 9/19/2010 12:49:01 | 25.832 |
| 9/18/2010 15:29:01 | 25.799 | 9/19/2010 13:09:01 | 25.832 |
| 9/18/2010 15:49:01 | 25.861 | 9/19/2010 13:29:01 | 25.832 |
| 9/18/2010 16:09:01 | 25.861 | 9/19/2010 13:49:01 | 25.832 |
| 9/18/2010 16:29:01 | 25.924 | 9/19/2010 14:09:01 | 25.77  |
| 9/18/2010 16:49:01 | 25.986 | 9/19/2010 14:29:01 | 25.77  |
| 9/18/2010 17:09:01 | 25.986 | 9/19/2010 14:49:01 | 25.77  |
| 9/18/2010 17:29:01 | 26.049 | 9/19/2010 15:09:01 | 25.77  |
| 9/18/2010 17:49:01 | 26.111 | 9/19/2010 15:29:01 | 25.77  |
| 9/18/2010 18:09:01 | 26.174 | 9/19/2010 15:49:01 | 25.77  |
| 9/18/2010 18:29:01 | 26.174 | 9/19/2010 16:09:01 | 25.77  |
| 9/18/2010 18:49:01 | 26.236 | 9/19/2010 16:29:01 | 25.77  |
| 9/18/2010 19:09:01 | 26.299 | 9/19/2010 16:49:01 | 25.77  |
| 9/18/2010 19:29:01 | 26.299 | 9/19/2010 17:09:01 | 25.77  |
| 9/18/2010 19:49:01 | 26.361 | 9/19/2010 17:29:01 | 25.77  |
| 9/18/2010 20:09:01 | 26.361 | 9/19/2010 17:49:01 | 25.77  |
| 9/18/2010 20:29:01 | 26.424 | 9/19/2010 18:09:01 | 25.832 |
| 9/18/2010 20:49:01 | 26.424 | 9/19/2010 18:29:01 | 25.832 |
| 9/18/2010 21:09:01 | 26.486 | 9/19/2010 18:49:01 | 25.832 |
| 9/18/2010 21:29:01 | 26.486 | 9/19/2010 19:09:01 | 25.832 |
| 9/18/2010 21:49:01 | 26.486 | 9/19/2010 19:29:01 | 25.832 |
| 9/18/2010 22:09:01 | 26.486 | 9/19/2010 19:49:01 | 25.895 |
| 9/18/2010 22:29:01 | 26.549 | 9/19/2010 20:09:01 | 25.895 |

|                    |        |                    |        |
|--------------------|--------|--------------------|--------|
| 9/18/2010 22:49:01 | 26.549 | 9/19/2010 20:29:01 | 25.895 |
| 9/18/2010 23:09:01 | 26.549 | 9/19/2010 20:49:01 | 25.957 |
| 9/18/2010 23:29:01 | 26.549 | 9/19/2010 21:09:01 | 25.957 |
| 9/18/2010 23:49:01 | 26.549 | 9/19/2010 21:29:01 | 25.957 |
| 9/19/2010 00:09:01 | 26.549 | 9/19/2010 21:49:01 | 25.957 |
| 9/19/2010 00:29:01 | 26.549 | 9/19/2010 22:09:01 | 26.02  |
| 9/19/2010 00:49:01 | 26.486 | 9/19/2010 22:29:01 | 26.02  |
| 9/19/2010 01:09:01 | 26.486 | 9/19/2010 22:49:01 | 26.02  |
| 9/19/2010 01:29:01 | 26.486 | 9/19/2010 23:09:01 | 26.02  |
| 9/19/2010 01:49:01 | 26.486 | 9/19/2010 23:29:01 | 26.082 |
| 9/19/2010 02:09:01 | 26.486 | 9/19/2010 23:49:01 | 26.082 |
| 9/19/2010 02:29:01 | 26.486 | 9/20/2010 00:09:01 | 26.082 |
| 9/19/2010 02:49:01 | 26.424 | 9/20/2010 00:29:01 | 26.082 |
| 9/19/2010 03:09:01 | 26.424 | 9/20/2010 00:49:01 | 26.082 |
| 9/19/2010 03:29:01 | 26.424 | 9/20/2010 01:09:01 | 26.145 |
| 9/19/2010 03:49:01 | 26.361 | 9/20/2010 01:29:01 | 26.145 |
| 9/19/2010 04:09:01 | 26.361 | 9/20/2010 01:49:01 | 26.145 |
| 9/19/2010 04:29:01 | 26.361 | 9/20/2010 02:09:01 | 26.145 |
| 9/19/2010 04:49:01 | 26.299 | 9/20/2010 02:29:01 | 26.145 |
| 9/19/2010 05:09:01 | 26.299 | 9/20/2010 02:49:01 | 26.145 |
| 9/19/2010 05:29:01 | 26.299 | 9/20/2010 03:09:01 | 26.145 |
| 9/19/2010 05:49:01 | 26.236 | 9/20/2010 03:29:01 | 26.145 |
| 9/19/2010 06:09:01 | 26.236 | 9/20/2010 03:49:01 | 26.145 |
| 9/19/2010 06:29:01 | 26.174 | 9/20/2010 04:09:01 | 26.145 |
| 9/19/2010 06:49:01 | 26.174 | 9/20/2010 04:29:01 | 26.145 |
| 9/19/2010 07:09:01 | 26.174 | 9/20/2010 04:49:01 | 26.145 |
| 9/19/2010 07:29:01 | 26.111 | 9/20/2010 05:09:01 | 26.145 |
| 9/19/2010 07:49:01 | 26.111 | 9/20/2010 05:29:01 | 26.145 |
| 9/19/2010 08:09:01 | 26.049 | 9/20/2010 05:49:01 | 26.145 |
| 9/19/2010 08:29:01 | 26.049 | 9/20/2010 06:09:01 | 26.145 |
| 9/19/2010 08:49:01 | 25.986 | 9/20/2010 06:29:01 | 26.145 |
| 9/19/2010 09:09:01 | 25.986 | 9/20/2010 06:49:01 | 26.145 |
| 9/19/2010 09:29:01 | 25.924 | 9/20/2010 07:09:01 | 26.145 |
| 9/19/2010 09:49:01 | 25.924 | 9/20/2010 07:29:01 | 26.145 |
| 9/19/2010 10:09:01 | 25.861 | 9/20/2010 07:49:01 | 26.145 |
| 9/19/2010 10:29:01 | 25.861 | 9/20/2010 08:09:01 | 26.082 |
| 9/19/2010 10:49:01 | 25.799 | 9/20/2010 08:29:01 | 26.082 |
| 9/19/2010 11:09:01 | 25.799 | 9/20/2010 08:49:01 | 26.082 |
| 9/19/2010 11:29:01 | 25.799 | 9/20/2010 09:09:01 | 26.082 |
| 9/19/2010 11:49:01 | 25.736 | 9/20/2010 09:29:01 | 26.082 |
| 9/19/2010 12:09:01 | 25.736 | 9/20/2010 09:49:01 | 26.02  |
| 9/19/2010 12:29:01 | 25.736 | 9/20/2010 10:09:01 | 26.02  |
| 9/19/2010 12:49:01 | 25.736 | 9/20/2010 10:29:01 | 26.02  |
| 9/19/2010 13:09:01 | 25.736 | 9/20/2010 10:49:01 | 26.02  |
| 9/19/2010 13:29:01 | 25.736 | 9/20/2010 11:09:01 | 25.957 |
| 9/19/2010 13:49:01 | 25.674 | 9/20/2010 11:29:01 | 25.957 |
| 9/19/2010 14:09:01 | 25.736 | 9/20/2010 11:49:01 | 25.957 |
| 9/19/2010 14:29:01 | 25.736 | 9/20/2010 12:09:01 | 25.957 |
| 9/19/2010 14:49:01 | 25.736 | 9/20/2010 12:29:01 | 25.895 |
| 9/19/2010 15:09:01 | 25.799 | 9/20/2010 12:49:01 | 25.895 |

|                    |        |                    |        |
|--------------------|--------|--------------------|--------|
| 9/19/2010 15:29:01 | 25.799 | 9/20/2010 13:09:01 | 25.895 |
| 9/19/2010 15:49:01 | 25.861 | 9/20/2010 13:29:01 | 25.895 |
| 9/19/2010 16:09:01 | 25.861 | 9/20/2010 13:49:01 | 25.895 |
| 9/19/2010 16:29:01 | 25.924 | 9/20/2010 14:09:01 | 25.832 |
| 9/19/2010 16:49:01 | 25.986 | 9/20/2010 14:29:01 | 25.832 |
| 9/19/2010 17:09:01 | 25.986 | 9/20/2010 14:49:01 | 25.832 |
| 9/19/2010 17:29:01 | 26.049 | 9/20/2010 15:09:01 | 25.832 |
| 9/19/2010 17:49:01 | 26.111 | 9/20/2010 15:29:01 | 25.832 |
| 9/19/2010 18:09:01 | 26.174 | 9/20/2010 15:49:01 | 25.832 |
| 9/19/2010 18:29:01 | 26.236 | 9/20/2010 16:09:01 | 25.832 |
| 9/19/2010 18:49:01 | 26.236 | 9/20/2010 16:29:01 | 25.832 |
| 9/19/2010 19:09:01 | 26.299 | 9/20/2010 16:49:01 | 25.832 |
| 9/19/2010 19:29:01 | 26.361 | 9/20/2010 17:09:01 | 25.832 |
| 9/19/2010 19:49:01 | 26.361 | 9/20/2010 17:29:01 | 25.832 |
| 9/19/2010 20:09:01 | 26.424 | 9/20/2010 17:49:01 | 25.832 |
| 9/19/2010 20:29:01 | 26.424 | 9/20/2010 18:09:01 | 25.832 |
| 9/19/2010 20:49:01 | 26.486 | 9/20/2010 18:29:01 | 25.895 |
| 9/19/2010 21:09:01 | 26.486 | 9/20/2010 18:49:01 | 25.895 |
| 9/19/2010 21:29:01 | 26.486 | 9/20/2010 19:09:01 | 25.895 |
| 9/19/2010 21:49:01 | 26.549 | 9/20/2010 19:29:01 | 25.895 |
| 9/19/2010 22:09:01 | 26.549 | 9/20/2010 19:49:01 | 25.895 |
| 9/19/2010 22:29:01 | 26.549 | 9/20/2010 20:09:01 | 25.957 |
| 9/19/2010 22:49:01 | 26.549 | 9/20/2010 20:29:01 | 25.957 |
| 9/19/2010 23:09:01 | 26.549 | 9/20/2010 20:49:01 | 25.957 |
| 9/19/2010 23:29:01 | 26.549 | 9/20/2010 21:09:01 | 25.957 |
| 9/19/2010 23:49:01 | 26.549 | 9/20/2010 21:29:01 | 26.02  |
| 9/20/2010 00:09:01 | 26.549 | 9/20/2010 21:49:01 | 26.02  |
| 9/20/2010 00:29:01 | 26.549 | 9/20/2010 22:09:01 | 26.02  |
| 9/20/2010 00:49:01 | 26.549 | 9/20/2010 22:29:01 | 26.082 |
| 9/20/2010 01:09:01 | 26.549 | 9/20/2010 22:49:01 | 26.082 |
| 9/20/2010 01:29:01 | 26.549 | 9/20/2010 23:09:01 | 26.082 |
| 9/20/2010 01:49:01 | 26.549 | 9/20/2010 23:29:01 | 26.082 |
| 9/20/2010 02:09:01 | 26.486 | 9/20/2010 23:49:01 | 26.145 |
| 9/20/2010 02:29:01 | 26.486 | 9/21/2010 00:09:01 | 26.145 |
| 9/20/2010 02:49:01 | 26.486 | 9/21/2010 00:29:01 | 26.145 |
| 9/20/2010 03:09:01 | 26.486 | 9/21/2010 00:49:01 | 26.145 |
| 9/20/2010 03:29:01 | 26.424 | 9/21/2010 01:09:01 | 26.145 |
| 9/20/2010 03:49:01 | 26.424 | 9/21/2010 01:29:01 | 26.145 |
| 9/20/2010 04:09:01 | 26.424 | 9/21/2010 01:49:01 | 26.145 |
| 9/20/2010 04:29:01 | 26.361 | 9/21/2010 02:09:01 | 26.207 |
| 9/20/2010 04:49:01 | 26.361 | 9/21/2010 02:29:01 | 26.207 |
| 9/20/2010 05:09:01 | 26.361 | 9/21/2010 02:49:01 | 26.207 |
| 9/20/2010 05:29:01 | 26.299 | 9/21/2010 03:09:01 | 26.207 |
| 9/20/2010 05:49:01 | 26.299 | 9/21/2010 03:29:01 | 26.207 |
| 9/20/2010 06:09:01 | 26.236 | 9/21/2010 03:49:01 | 26.207 |
| 9/20/2010 06:29:01 | 26.236 | 9/21/2010 04:09:01 | 26.207 |
| 9/20/2010 06:49:01 | 26.236 | 9/21/2010 04:29:01 | 26.207 |
| 9/20/2010 07:09:01 | 26.174 | 9/21/2010 04:49:01 | 26.207 |
| 9/20/2010 07:29:01 | 26.174 | 9/21/2010 05:09:01 | 26.207 |
| 9/20/2010 07:49:01 | 26.111 | 9/21/2010 05:29:01 | 26.207 |

|                    |        |                    |        |
|--------------------|--------|--------------------|--------|
| 9/20/2010 08:09:01 | 26.111 | 9/21/2010 05:49:01 | 26.145 |
| 9/20/2010 08:29:01 | 26.049 | 9/21/2010 06:09:01 | 26.145 |
| 9/20/2010 08:49:01 | 26.049 | 9/21/2010 06:29:01 | 26.145 |
| 9/20/2010 09:09:01 | 25.986 | 9/21/2010 06:49:01 | 26.145 |
| 9/20/2010 09:29:01 | 25.986 | 9/21/2010 07:09:01 | 26.145 |
| 9/20/2010 09:49:01 | 25.924 | 9/21/2010 07:29:01 | 26.145 |
| 9/20/2010 10:09:01 | 25.924 | 9/21/2010 07:49:01 | 26.145 |
| 9/20/2010 10:29:01 | 25.924 | 9/21/2010 08:09:01 | 26.145 |
| 9/20/2010 10:49:01 | 25.861 | 9/21/2010 08:29:01 | 26.082 |
| 9/20/2010 11:09:01 | 25.861 | 9/21/2010 08:49:01 | 26.082 |
| 9/20/2010 11:29:01 | 25.799 | 9/21/2010 09:09:01 | 26.082 |
| 9/20/2010 11:49:01 | 25.799 | 9/21/2010 09:29:01 | 26.082 |
| 9/20/2010 12:09:01 | 25.799 | 9/21/2010 09:49:01 | 26.02  |
| 9/20/2010 12:29:01 | 25.799 | 9/21/2010 10:09:01 | 26.02  |
| 9/20/2010 12:49:01 | 25.799 | 9/21/2010 10:29:01 | 26.02  |
| 9/20/2010 13:09:01 | 25.736 | 9/21/2010 10:49:01 | 26.02  |
| 9/20/2010 13:29:01 | 25.736 | 9/21/2010 11:09:01 | 26.02  |
| 9/20/2010 13:49:01 | 25.736 | 9/21/2010 11:29:01 | 25.957 |
| 9/20/2010 14:09:01 | 25.799 | 9/21/2010 11:49:01 | 25.957 |
| 9/20/2010 14:29:01 | 25.799 | 9/21/2010 12:09:01 | 25.957 |
| 9/20/2010 14:49:01 | 25.799 | 9/21/2010 12:29:01 | 25.957 |
| 9/20/2010 15:09:01 | 25.799 | 9/21/2010 12:49:01 | 25.895 |
| 9/20/2010 15:29:01 | 25.861 | 9/21/2010 13:09:01 | 25.895 |
| 9/20/2010 15:49:01 | 25.861 | 9/21/2010 13:29:01 | 25.895 |
| 9/20/2010 16:09:01 | 25.924 | 9/21/2010 13:49:01 | 25.895 |
| 9/20/2010 16:29:01 | 25.986 | 9/21/2010 14:09:01 | 25.895 |
| 9/20/2010 16:49:01 | 25.986 | 9/21/2010 14:29:01 | 25.895 |
| 9/20/2010 17:09:01 | 26.049 | 9/21/2010 14:49:01 | 25.832 |
| 9/20/2010 17:29:01 | 26.111 | 9/21/2010 15:09:01 | 25.832 |
| 9/20/2010 17:49:01 | 26.174 | 9/21/2010 15:29:01 | 25.832 |
| 9/20/2010 18:09:01 | 26.236 | 9/21/2010 15:49:01 | 25.832 |
| 9/20/2010 18:29:01 | 26.236 | 9/21/2010 16:09:01 | 25.832 |
| 9/20/2010 18:49:01 | 26.299 | 9/21/2010 16:29:01 | 25.832 |
| 9/20/2010 19:09:01 | 26.361 | 9/21/2010 16:49:01 | 25.832 |
| 9/20/2010 19:29:01 | 26.361 | 9/21/2010 17:09:01 | 25.895 |
| 9/20/2010 19:49:01 | 26.424 | 9/21/2010 17:29:01 | 25.895 |
| 9/20/2010 20:09:01 | 26.424 | 9/21/2010 17:49:01 | 25.895 |
| 9/20/2010 20:29:01 | 26.486 | 9/21/2010 18:09:01 | 25.895 |
| 9/20/2010 20:49:01 | 26.486 | 9/21/2010 18:29:01 | 25.895 |
| 9/20/2010 21:09:01 | 26.549 | 9/21/2010 18:49:01 | 25.895 |
| 9/20/2010 21:29:01 | 26.549 | 9/21/2010 19:09:01 | 25.957 |
| 9/20/2010 21:49:01 | 26.549 | 9/21/2010 19:29:01 | 25.957 |
| 9/20/2010 22:09:01 | 26.611 | 9/21/2010 19:49:01 | 25.957 |
| 9/20/2010 22:29:01 | 26.611 | 9/21/2010 20:09:01 | 26.02  |
| 9/20/2010 22:49:01 | 26.611 | 9/21/2010 20:29:01 | 26.02  |
| 9/20/2010 23:09:01 | 26.611 | 9/21/2010 20:49:01 | 26.02  |
| 9/20/2010 23:29:01 | 26.611 | 9/21/2010 21:09:01 | 26.082 |
| 9/20/2010 23:49:01 | 26.611 | 9/21/2010 21:29:01 | 26.082 |
| 9/21/2010 00:09:01 | 26.611 | 9/21/2010 21:49:01 | 26.082 |
| 9/21/2010 00:29:01 | 26.611 | 9/21/2010 22:09:01 | 26.082 |

|                    |        |                    |        |
|--------------------|--------|--------------------|--------|
| 9/21/2010 00:49:01 | 26.611 | 9/21/2010 22:29:01 | 26.145 |
| 9/21/2010 01:09:01 | 26.549 | 9/21/2010 22:49:01 | 26.145 |
| 9/21/2010 01:29:01 | 26.549 | 9/21/2010 23:09:01 | 26.145 |
| 9/21/2010 01:49:01 | 26.549 | 9/21/2010 23:29:01 | 26.145 |
| 9/21/2010 02:09:01 | 26.549 | 9/21/2010 23:49:01 | 26.207 |
| 9/21/2010 02:29:01 | 26.549 | 9/22/2010 00:09:01 | 26.207 |
| 9/21/2010 02:49:01 | 26.486 | 9/22/2010 00:29:01 | 26.207 |
| 9/21/2010 03:09:01 | 26.486 | 9/22/2010 00:49:01 | 26.207 |
| 9/21/2010 03:29:01 | 26.486 | 9/22/2010 01:09:01 | 26.27  |
| 9/21/2010 03:49:01 | 26.424 | 9/22/2010 01:29:01 | 26.27  |
| 9/21/2010 04:09:01 | 26.424 | 9/22/2010 01:49:01 | 26.27  |
| 9/21/2010 04:29:01 | 26.424 | 9/22/2010 02:09:01 | 26.27  |
| 9/21/2010 04:49:01 | 26.361 | 9/22/2010 02:29:01 | 26.27  |
| 9/21/2010 05:09:01 | 26.361 | 9/22/2010 02:49:01 | 26.27  |
| 9/21/2010 05:29:01 | 26.299 | 9/22/2010 03:09:01 | 26.27  |
| 9/21/2010 05:49:01 | 26.299 | 9/22/2010 03:29:01 | 26.27  |
| 9/21/2010 06:09:01 | 26.299 | 9/22/2010 03:49:01 | 26.27  |
| 9/21/2010 06:29:01 | 26.236 | 9/22/2010 04:09:01 | 26.27  |
| 9/21/2010 06:49:01 | 26.236 | 9/22/2010 04:29:01 | 26.27  |
| 9/21/2010 07:09:01 | 26.174 | 9/22/2010 04:49:01 | 26.27  |
| 9/21/2010 07:29:01 | 26.174 | 9/22/2010 05:09:01 | 26.27  |
| 9/21/2010 07:49:01 | 26.111 | 9/22/2010 05:29:01 | 26.27  |
| 9/21/2010 08:09:01 | 26.111 | 9/22/2010 05:49:01 | 26.27  |
| 9/21/2010 08:29:01 | 26.111 | 9/22/2010 06:09:01 | 26.27  |
| 9/21/2010 08:49:01 | 26.049 | 9/22/2010 06:29:01 | 26.27  |
| 9/21/2010 09:09:01 | 26.049 | 9/22/2010 06:49:01 | 26.207 |
| 9/21/2010 09:29:01 | 25.986 | 9/22/2010 07:09:01 | 26.207 |
| 9/21/2010 09:49:01 | 25.986 | 9/22/2010 07:29:01 | 26.207 |
| 9/21/2010 10:09:01 | 25.924 | 9/22/2010 07:49:01 | 26.207 |
| 9/21/2010 10:29:01 | 25.924 | 9/22/2010 08:09:01 | 26.207 |
| 9/21/2010 10:49:01 | 25.861 | 9/22/2010 08:29:01 | 26.145 |
| 9/21/2010 11:09:01 | 25.861 | 9/22/2010 08:49:01 | 26.145 |
| 9/21/2010 11:29:01 | 25.861 | 9/22/2010 09:09:01 | 26.145 |
| 9/21/2010 11:49:01 | 25.799 | 9/22/2010 09:29:01 | 26.145 |
| 9/21/2010 12:09:01 | 25.799 | 9/22/2010 09:49:01 | 26.082 |
| 9/21/2010 12:29:01 | 25.799 | 9/22/2010 10:09:01 | 26.082 |
| 9/21/2010 12:49:01 | 25.799 | 9/22/2010 10:29:01 | 26.082 |
| 9/21/2010 13:09:01 | 25.799 | 9/22/2010 10:49:01 | 26.082 |
| 9/21/2010 13:29:01 | 25.799 | 9/22/2010 11:09:01 | 26.02  |
| 9/21/2010 13:49:01 | 25.799 | 9/22/2010 11:29:01 | 26.02  |
| 9/21/2010 14:09:01 | 25.799 | 9/22/2010 11:49:01 | 26.02  |
| 9/21/2010 14:29:01 | 25.861 | 9/22/2010 12:09:01 | 26.02  |
| 9/21/2010 14:49:01 | 25.861 | 9/22/2010 12:29:01 | 25.957 |
| 9/21/2010 15:09:01 | 25.861 | 9/22/2010 12:49:01 | 25.957 |
| 9/21/2010 15:29:01 | 25.924 | 9/22/2010 13:09:01 | 25.957 |
| 9/21/2010 15:49:01 | 25.924 | 9/22/2010 13:29:01 | 25.957 |
| 9/21/2010 16:09:01 | 25.986 | 9/22/2010 13:49:01 | 25.895 |
| 9/21/2010 16:29:01 | 26.049 | 9/22/2010 14:09:01 | 25.895 |
| 9/21/2010 16:49:01 | 26.049 | 9/22/2010 14:29:01 | 25.895 |
| 9/21/2010 17:09:01 | 26.111 | 9/22/2010 14:49:01 | 25.895 |



|                    |        |                    |        |
|--------------------|--------|--------------------|--------|
| 9/21/2010 17:29:01 | 26.174 | 9/22/2010 15:09:01 | 25.895 |
| 9/21/2010 17:49:01 | 26.236 | 9/22/2010 15:29:01 | 25.895 |
| 9/21/2010 18:09:01 | 26.299 | 9/22/2010 15:49:01 | 25.895 |
| 9/21/2010 18:29:01 | 26.299 | 9/22/2010 16:09:01 | 25.895 |
| 9/21/2010 18:49:01 | 26.361 | 9/22/2010 16:29:01 | 25.895 |
| 9/21/2010 19:09:01 | 26.424 | 9/22/2010 16:49:01 | 25.895 |
| 9/21/2010 19:29:01 | 26.424 | 9/22/2010 17:09:01 | 25.895 |
| 9/21/2010 19:49:01 | 26.486 | 9/22/2010 17:29:01 | 25.895 |
| 9/21/2010 20:09:01 | 26.549 | 9/22/2010 17:49:01 | 25.895 |
| 9/21/2010 20:29:01 | 26.549 | 9/22/2010 18:09:01 | 25.957 |
| 9/21/2010 20:49:01 | 26.611 | 9/22/2010 18:29:01 | 25.957 |
| 9/21/2010 21:09:01 | 26.611 | 9/22/2010 18:49:01 | 25.957 |
| 9/21/2010 21:29:01 | 26.611 | 9/22/2010 19:09:01 | 25.957 |
| 9/21/2010 21:49:01 | 26.611 | 9/22/2010 19:29:01 | 25.957 |
| 9/21/2010 22:09:01 | 26.673 | 9/22/2010 19:49:01 | 26.02  |
| 9/21/2010 22:29:01 | 26.673 | 9/22/2010 20:09:01 | 26.02  |
| 9/21/2010 22:49:01 | 26.673 | 9/22/2010 20:29:01 | 26.02  |
| 9/21/2010 23:09:01 | 26.673 | 9/22/2010 20:49:01 | 26.082 |
| 9/21/2010 23:29:01 | 26.673 | 9/22/2010 21:09:01 | 26.082 |
| 9/21/2010 23:49:01 | 26.673 | 9/22/2010 21:29:01 | 26.082 |
| 9/22/2010 00:09:01 | 26.673 | 9/22/2010 21:49:01 | 26.145 |
| 9/22/2010 00:29:01 | 26.673 | 9/22/2010 22:09:01 | 26.145 |
| 9/22/2010 00:49:01 | 26.673 | 9/22/2010 22:29:01 | 26.145 |
| 9/22/2010 01:09:01 | 26.673 | 9/22/2010 22:49:01 | 26.145 |
| 9/22/2010 01:29:01 | 26.611 | 9/22/2010 23:09:01 | 26.207 |
| 9/22/2010 01:49:01 | 26.611 | 9/22/2010 23:29:01 | 26.207 |
| 9/22/2010 02:09:01 | 26.611 | 9/22/2010 23:49:01 | 26.207 |
| 9/22/2010 02:29:01 | 26.611 | 9/23/2010 00:09:01 | 26.207 |
| 9/22/2010 02:49:01 | 26.549 | 9/23/2010 00:29:01 | 26.27  |
| 9/22/2010 03:09:01 | 26.549 | 9/23/2010 00:49:01 | 26.27  |
| 9/22/2010 03:29:01 | 26.549 | 9/23/2010 01:09:01 | 26.27  |
| 9/22/2010 03:49:01 | 26.486 | 9/23/2010 01:29:01 | 26.27  |
| 9/22/2010 04:09:01 | 26.486 | 9/23/2010 01:49:01 | 26.27  |
| 9/22/2010 04:29:01 | 26.424 | 9/23/2010 02:09:01 | 26.27  |
| 9/22/2010 04:49:01 | 26.424 | 9/23/2010 02:29:01 | 26.27  |
| 9/22/2010 05:09:01 | 26.424 | 9/23/2010 02:49:01 | 26.27  |
| 9/22/2010 05:29:01 | 26.361 | 9/23/2010 03:09:01 | 26.332 |
| 9/22/2010 05:49:01 | 26.361 | 9/23/2010 03:29:01 | 26.332 |
| 9/22/2010 06:09:01 | 26.299 | 9/23/2010 03:49:01 | 26.332 |
| 9/22/2010 06:29:01 | 26.299 | 9/23/2010 04:09:01 | 26.332 |
| 9/22/2010 06:49:01 | 26.236 | 9/23/2010 04:29:01 | 26.332 |
| 9/22/2010 07:09:01 | 26.236 | 9/23/2010 04:49:01 | 26.332 |
| 9/22/2010 07:29:01 | 26.174 | 9/23/2010 05:09:01 | 26.332 |
| 9/22/2010 07:49:01 | 26.174 | 9/23/2010 05:29:01 | 26.332 |
| 9/22/2010 08:09:01 | 26.111 | 9/23/2010 05:49:01 | 26.332 |
| 9/22/2010 08:29:01 | 26.049 | 9/23/2010 06:09:01 | 26.332 |
| 9/22/2010 08:49:01 | 26.049 | 9/23/2010 06:29:01 | 26.27  |
| 9/22/2010 09:09:01 | 25.986 | 9/23/2010 06:49:01 | 26.27  |
| 9/22/2010 09:29:01 | 25.986 | 9/23/2010 07:09:01 | 26.27  |
| 9/22/2010 09:49:01 | 25.924 | 9/23/2010 07:29:01 | 26.27  |

|                    |        |                    |        |
|--------------------|--------|--------------------|--------|
| 9/22/2010 10:09:01 | 25.924 | 9/23/2010 07:49:01 | 26.27  |
| 9/22/2010 10:29:01 | 25.861 | 9/23/2010 08:09:01 | 26.27  |
| 9/22/2010 10:49:01 | 25.861 | 9/23/2010 08:29:01 | 26.27  |
| 9/22/2010 11:09:01 | 25.799 | 9/23/2010 08:49:01 | 26.207 |
| 9/22/2010 11:29:01 | 25.799 | 9/23/2010 09:09:01 | 26.207 |
| 9/22/2010 11:49:01 | 25.736 | 9/23/2010 09:29:01 | 26.207 |
| 9/22/2010 12:09:01 | 25.736 | 9/23/2010 09:49:01 | 26.207 |
| 9/22/2010 12:29:01 | 25.736 | 9/23/2010 10:09:01 | 26.207 |
| 9/22/2010 12:49:01 | 25.736 | 9/23/2010 10:29:01 | 26.207 |
| 9/22/2010 13:09:01 | 25.736 | 9/23/2010 10:49:01 | 26.145 |
| 9/22/2010 13:29:01 | 25.736 | 9/23/2010 11:09:01 | 26.145 |
| 9/22/2010 13:49:01 | 25.736 | 9/23/2010 11:29:01 | 26.145 |
| 9/22/2010 14:09:01 | 25.736 | 9/23/2010 11:49:01 | 26.145 |
| 9/22/2010 14:29:01 | 25.736 | 9/23/2010 12:09:01 | 26.082 |
| 9/22/2010 14:49:01 | 25.736 | 9/23/2010 12:29:01 | 26.082 |
| 9/22/2010 15:09:01 | 25.799 | 9/23/2010 12:49:01 | 26.082 |
| 9/22/2010 15:29:01 | 25.799 | 9/23/2010 13:09:01 | 26.082 |
| 9/22/2010 15:49:01 | 25.861 | 9/23/2010 13:29:01 | 26.02  |
| 9/22/2010 16:09:01 | 25.861 | 9/23/2010 13:49:01 | 26.02  |
| 9/22/2010 16:29:01 | 25.924 | 9/23/2010 14:09:01 | 26.02  |
| 9/22/2010 16:49:01 | 25.986 | 9/23/2010 14:29:01 | 26.02  |
| 9/22/2010 17:09:01 | 26.049 | 9/23/2010 14:49:01 | 26.02  |
| 9/22/2010 17:29:01 | 26.049 | 9/23/2010 15:09:01 | 26.02  |
| 9/22/2010 17:49:01 | 26.111 | 9/23/2010 15:29:01 | 26.02  |
| 9/22/2010 18:09:01 | 26.174 | 9/23/2010 15:49:01 | 26.02  |
| 9/22/2010 18:29:01 | 26.236 | 9/23/2010 16:09:01 | 26.02  |
| 9/22/2010 18:49:01 | 26.236 | 9/23/2010 16:29:01 | 26.02  |
| 9/22/2010 19:09:01 | 26.299 | 9/23/2010 16:49:01 | 26.02  |
| 9/22/2010 19:29:01 | 26.361 | 9/23/2010 17:09:01 | 26.02  |
| 9/22/2010 19:49:01 | 26.361 | 9/23/2010 17:29:01 | 26.082 |
| 9/22/2010 20:09:01 | 26.424 | 9/23/2010 17:49:01 | 26.082 |
| 9/22/2010 20:29:01 | 26.424 | 9/23/2010 18:09:01 | 26.082 |
| 9/22/2010 20:49:01 | 26.486 | 9/23/2010 18:29:01 | 26.082 |
| 9/22/2010 21:09:01 | 26.486 | 9/23/2010 18:49:01 | 26.145 |
| 9/22/2010 21:29:01 | 26.486 | 9/23/2010 19:09:01 | 26.145 |
| 9/22/2010 21:49:01 | 26.549 | 9/23/2010 19:29:01 | 26.145 |
| 9/22/2010 22:09:01 | 26.549 | 9/23/2010 19:49:01 | 26.145 |
| 9/22/2010 22:29:01 | 26.549 | 9/23/2010 20:09:01 | 26.207 |
| 9/22/2010 22:49:01 | 26.549 | 9/23/2010 20:29:01 | 26.207 |
| 9/22/2010 23:09:01 | 26.611 | 9/23/2010 20:49:01 | 26.27  |
| 9/22/2010 23:29:01 | 26.611 | 9/23/2010 21:09:01 | 26.27  |
| 9/22/2010 23:49:01 | 26.611 | 9/23/2010 21:29:01 | 26.27  |
| 9/23/2010 00:09:01 | 26.611 | 9/23/2010 21:49:01 | 26.27  |
| 9/23/2010 00:29:01 | 26.611 | 9/23/2010 22:09:01 | 26.332 |
| 9/23/2010 00:49:01 | 26.549 | 9/23/2010 22:29:01 | 26.332 |
| 9/23/2010 01:09:01 | 26.549 | 9/23/2010 22:49:01 | 26.332 |
| 9/23/2010 01:29:01 | 26.549 | 9/23/2010 23:09:01 | 26.395 |
| 9/23/2010 01:49:01 | 26.549 | 9/23/2010 23:29:01 | 26.395 |
| 9/23/2010 02:09:01 | 26.549 | 9/23/2010 23:49:01 | 26.395 |
| 9/23/2010 02:29:01 | 26.549 | 9/24/2010 00:09:01 | 26.395 |

|                    |        |                    |        |
|--------------------|--------|--------------------|--------|
| 9/23/2010 02:49:01 | 26.549 | 9/24/2010 00:29:01 | 26.457 |
| 9/23/2010 03:09:01 | 26.486 | 9/24/2010 00:49:01 | 26.457 |
| 9/23/2010 03:29:01 | 26.486 | 9/24/2010 01:09:01 | 26.457 |
| 9/23/2010 03:49:01 | 26.486 | 9/24/2010 01:29:01 | 26.457 |
| 9/23/2010 04:09:01 | 26.486 | 9/24/2010 01:49:01 | 26.457 |
| 9/23/2010 04:29:01 | 26.424 | 9/24/2010 02:09:01 | 26.52  |
| 9/23/2010 04:49:01 | 26.424 | 9/24/2010 02:29:01 | 26.52  |
| 9/23/2010 05:09:01 | 26.361 | 9/24/2010 02:49:01 | 26.52  |
| 9/23/2010 05:29:01 | 26.361 | 9/24/2010 03:09:01 | 26.52  |
| 9/23/2010 05:49:01 | 26.361 | 9/24/2010 03:29:01 | 26.52  |
| 9/23/2010 06:09:01 | 26.299 | 9/24/2010 03:49:01 | 26.52  |
| 9/23/2010 06:29:01 | 26.299 | 9/24/2010 04:09:01 | 26.52  |
| 9/23/2010 06:49:01 | 26.299 | 9/24/2010 04:29:01 | 26.52  |
| 9/23/2010 07:09:01 | 26.236 | 9/24/2010 04:49:01 | 26.52  |
| 9/23/2010 07:29:01 | 26.236 | 9/24/2010 05:09:01 | 26.52  |
| 9/23/2010 07:49:01 | 26.174 | 9/24/2010 05:29:01 | 26.52  |
| 9/23/2010 08:09:01 | 26.174 | 9/24/2010 05:49:01 | 26.52  |
| 9/23/2010 08:29:01 | 26.174 | 9/24/2010 06:09:01 | 26.52  |
| 9/23/2010 08:49:01 | 26.111 | 9/24/2010 06:29:01 | 26.52  |
| 9/23/2010 09:09:01 | 26.111 | 9/24/2010 06:49:01 | 26.52  |
| 9/23/2010 09:29:01 | 26.049 | 9/24/2010 07:09:01 | 26.52  |
| 9/23/2010 09:49:01 | 26.049 | 9/24/2010 07:29:01 | 26.52  |
| 9/23/2010 10:09:01 | 25.986 | 9/24/2010 07:49:01 | 26.52  |
| 9/23/2010 10:29:01 | 25.986 | 9/24/2010 08:09:01 | 26.52  |
| 9/23/2010 10:49:01 | 25.986 | 9/24/2010 08:29:01 | 26.457 |
| 9/23/2010 11:09:01 | 25.924 | 9/24/2010 08:49:01 | 26.457 |
| 9/23/2010 11:29:01 | 25.924 | 9/24/2010 09:09:01 | 26.457 |
| 9/23/2010 11:49:01 | 25.924 | 9/24/2010 09:29:01 | 26.457 |
| 9/23/2010 12:09:01 | 25.861 | 9/24/2010 09:49:01 | 26.457 |
| 9/23/2010 12:29:01 | 25.861 | 9/24/2010 10:09:01 | 26.457 |
| 9/23/2010 12:49:01 | 25.861 | 9/24/2010 10:29:01 | 26.395 |
| 9/23/2010 13:09:01 | 25.861 | 9/24/2010 10:49:01 | 26.395 |
| 9/23/2010 13:29:01 | 25.861 | 9/24/2010 11:09:01 | 26.395 |
| 9/23/2010 13:49:01 | 25.861 | 9/24/2010 11:29:01 | 26.395 |
| 9/23/2010 14:09:01 | 25.861 | 9/24/2010 11:49:01 | 26.395 |
| 9/23/2010 14:29:01 | 25.924 | 9/24/2010 12:09:01 | 26.332 |
| 9/23/2010 14:49:01 | 25.924 | 9/24/2010 12:29:01 | 26.332 |
| 9/23/2010 15:09:01 | 25.924 | 9/24/2010 12:49:01 | 26.332 |
| 9/23/2010 15:29:01 | 25.986 | 9/24/2010 13:09:01 | 26.332 |
| 9/23/2010 15:49:01 | 25.986 | 9/24/2010 13:29:01 | 26.332 |
| 9/23/2010 16:09:01 | 26.049 | 9/24/2010 13:49:01 | 26.27  |
| 9/23/2010 16:29:01 | 26.111 | 9/24/2010 14:09:01 | 26.27  |
| 9/23/2010 16:49:01 | 26.174 | 9/24/2010 14:29:01 | 26.27  |
| 9/23/2010 17:09:01 | 26.174 | 9/24/2010 14:49:01 | 26.27  |
| 9/23/2010 17:29:01 | 26.236 | 9/24/2010 15:09:01 | 26.27  |
| 9/23/2010 17:49:01 | 26.299 | 9/24/2010 15:29:01 | 26.27  |
| 9/23/2010 18:09:01 | 26.361 | 9/24/2010 15:49:01 | 26.27  |
| 9/23/2010 18:29:01 | 26.424 | 9/24/2010 16:09:01 | 26.27  |
| 9/23/2010 18:49:01 | 26.486 | 9/24/2010 16:29:01 | 26.27  |
| 9/23/2010 19:09:01 | 26.486 | 9/24/2010 16:49:01 | 26.27  |

|                    |        |                    |        |
|--------------------|--------|--------------------|--------|
| 9/23/2010 19:29:01 | 26.549 | 9/24/2010 17:09:01 | 26.332 |
| 9/23/2010 19:49:01 | 26.611 | 9/24/2010 17:29:01 | 26.332 |
| 9/23/2010 20:09:01 | 26.611 | 9/24/2010 17:49:01 | 26.332 |
| 9/23/2010 20:29:01 | 26.673 | 9/24/2010 18:09:01 | 26.332 |
| 9/23/2010 20:49:01 | 26.673 | 9/24/2010 18:29:01 | 26.332 |
| 9/23/2010 21:09:01 | 26.736 | 9/24/2010 18:49:01 | 26.395 |
| 9/23/2010 21:29:01 | 26.736 | 9/24/2010 19:09:01 | 26.395 |
| 9/23/2010 21:49:01 | 26.736 | 9/24/2010 19:29:01 | 26.395 |
| 9/23/2010 22:09:01 | 26.798 | 9/24/2010 19:49:01 | 26.457 |
| 9/23/2010 22:29:01 | 26.798 | 9/24/2010 20:09:01 | 26.457 |
| 9/23/2010 22:49:01 | 26.798 | 9/24/2010 20:29:01 | 26.457 |
| 9/23/2010 23:09:01 | 26.798 | 9/24/2010 20:49:01 | 26.52  |
| 9/23/2010 23:29:01 | 26.798 | 9/24/2010 21:09:01 | 26.52  |
| 9/23/2010 23:49:01 | 26.798 | 9/24/2010 21:29:01 | 26.52  |
| 9/24/2010 00:09:01 | 26.798 | 9/24/2010 21:49:01 | 26.582 |
| 9/24/2010 00:29:01 | 26.798 | 9/24/2010 22:09:01 | 26.582 |
| 9/24/2010 00:49:01 | 26.798 | 9/24/2010 22:29:01 | 26.582 |
| 9/24/2010 01:09:01 | 26.798 | 9/24/2010 22:49:01 | 26.645 |
| 9/24/2010 01:29:01 | 26.798 | 9/24/2010 23:09:01 | 26.645 |
| 9/24/2010 01:49:01 | 26.798 | 9/24/2010 23:29:01 | 26.645 |
| 9/24/2010 02:09:01 | 26.798 | 9/24/2010 23:49:01 | 26.707 |
| 9/24/2010 02:29:01 | 26.798 | 9/25/2010 00:09:01 | 26.707 |
| 9/24/2010 02:49:01 | 26.798 | 9/25/2010 00:29:01 | 26.707 |
| 9/24/2010 03:09:01 | 26.736 | 9/25/2010 00:49:01 | 26.707 |
| 9/24/2010 03:29:01 | 26.736 | 9/25/2010 01:09:01 | 26.707 |
| 9/24/2010 03:49:01 | 26.736 | 9/25/2010 01:29:01 | 26.707 |
| 9/24/2010 04:09:01 | 26.736 | 9/25/2010 01:49:01 | 26.77  |
| 9/24/2010 04:29:01 | 26.673 | 9/25/2010 02:09:01 | 26.77  |
| 9/24/2010 04:49:01 | 26.673 | 9/25/2010 02:29:01 | 26.77  |
| 9/24/2010 05:09:01 | 26.673 | 9/25/2010 02:49:01 | 26.77  |
| 9/24/2010 05:29:01 | 26.611 | 9/25/2010 03:09:01 | 26.77  |
| 9/24/2010 05:49:01 | 26.611 | 9/25/2010 03:29:01 | 26.77  |
| 9/24/2010 06:09:01 | 26.611 | 9/25/2010 03:49:01 | 26.77  |
| 9/24/2010 06:29:01 | 26.549 | 9/25/2010 04:09:01 | 26.77  |
| 9/24/2010 06:49:01 | 26.549 | 9/25/2010 04:29:01 | 26.77  |
| 9/24/2010 07:09:01 | 26.549 | 9/25/2010 04:49:01 | 26.77  |
| 9/24/2010 07:29:01 | 26.486 | 9/25/2010 05:09:01 | 26.77  |
| 9/24/2010 07:49:01 | 26.486 | 9/25/2010 05:29:01 | 26.77  |
| 9/24/2010 08:09:01 | 26.486 | 9/25/2010 05:49:01 | 26.77  |
| 9/24/2010 08:29:01 | 26.424 | 9/25/2010 06:09:01 | 26.77  |
| 9/24/2010 08:49:01 | 26.424 | 9/25/2010 06:29:01 | 26.77  |
| 9/24/2010 09:09:01 | 26.361 | 9/25/2010 06:49:01 | 26.77  |
| 9/24/2010 09:29:01 | 26.361 | 9/25/2010 07:09:01 | 26.77  |
| 9/24/2010 09:49:01 | 26.299 | 9/25/2010 07:29:01 | 26.707 |
| 9/24/2010 10:09:01 | 26.299 | 9/25/2010 07:49:01 | 26.707 |
| 9/24/2010 10:29:01 | 26.236 | 9/25/2010 08:09:01 | 26.707 |
| 9/24/2010 10:49:01 | 26.236 | 9/25/2010 08:29:01 | 26.707 |
| 9/24/2010 11:09:01 | 26.236 | 9/25/2010 08:49:01 | 26.707 |
| 9/24/2010 11:29:01 | 26.174 | 9/25/2010 09:09:01 | 26.707 |
| 9/24/2010 11:49:01 | 26.174 | 9/25/2010 09:29:01 | 26.645 |

|                    |        |                    |        |
|--------------------|--------|--------------------|--------|
| 9/24/2010 12:09:01 | 26.174 | 9/25/2010 09:49:01 | 26.645 |
| 9/24/2010 12:29:01 | 26.174 | 9/25/2010 10:09:01 | 26.645 |
| 9/24/2010 12:49:01 | 26.174 | 9/25/2010 10:29:01 | 26.645 |
| 9/24/2010 13:09:01 | 26.174 | 9/25/2010 10:49:01 | 26.582 |
| 9/24/2010 13:29:01 | 26.174 | 9/25/2010 11:09:01 | 26.582 |
| 9/24/2010 13:49:01 | 26.174 | 9/25/2010 11:29:01 | 26.582 |
| 9/24/2010 14:09:01 | 26.174 | 9/25/2010 11:49:01 | 26.582 |
| 9/24/2010 14:29:01 | 26.174 | 9/25/2010 12:09:01 | 26.52  |
| 9/24/2010 14:49:01 | 26.236 | 9/25/2010 12:29:01 | 26.52  |
| 9/24/2010 15:09:01 | 26.236 | 9/25/2010 12:49:01 | 26.52  |
| 9/24/2010 15:29:01 | 26.236 | 9/25/2010 13:09:01 | 26.52  |
| 9/24/2010 15:49:01 | 26.299 | 9/25/2010 13:29:01 | 26.457 |
| 9/24/2010 16:09:01 | 26.361 | 9/25/2010 13:49:01 | 26.457 |
| 9/24/2010 16:29:01 | 26.361 | 9/25/2010 14:09:01 | 26.457 |
| 9/24/2010 16:49:01 | 26.424 | 9/25/2010 14:29:01 | 26.457 |
| 9/24/2010 17:09:01 | 26.486 | 9/25/2010 14:49:01 | 26.457 |
| 9/24/2010 17:29:01 | 26.549 | 9/25/2010 15:09:01 | 26.457 |
| 9/24/2010 17:49:01 | 26.611 | 9/25/2010 15:29:01 | 26.457 |
| 9/24/2010 18:09:01 | 26.673 | 9/25/2010 15:49:01 | 26.395 |
| 9/24/2010 18:29:01 | 26.673 | 9/25/2010 16:09:01 | 26.457 |
| 9/24/2010 18:49:01 | 26.736 | 9/25/2010 16:29:01 | 26.457 |
| 9/24/2010 19:09:01 | 26.798 | 9/25/2010 16:49:01 | 26.457 |
| 9/24/2010 19:29:01 | 26.861 | 9/25/2010 17:09:01 | 26.457 |
| 9/24/2010 19:49:01 | 26.861 | 9/25/2010 17:29:01 | 26.457 |
| 9/24/2010 20:09:01 | 26.923 | 9/25/2010 17:49:01 | 26.457 |
| 9/24/2010 20:29:01 | 26.986 | 9/25/2010 18:09:01 | 26.457 |
| 9/24/2010 20:49:01 | 26.986 | 9/25/2010 18:29:01 | 26.52  |
| 9/24/2010 21:09:01 | 27.048 | 9/25/2010 18:49:01 | 26.52  |
| 9/24/2010 21:29:01 | 27.048 | 9/25/2010 19:09:01 | 26.52  |
| 9/24/2010 21:49:01 | 27.048 | 9/25/2010 19:29:01 | 26.52  |
| 9/24/2010 22:09:01 | 27.048 | 9/25/2010 19:49:01 | 26.582 |
| 9/24/2010 22:29:01 | 27.111 | 9/25/2010 20:09:01 | 26.582 |
| 9/24/2010 22:49:01 | 27.111 | 9/25/2010 20:29:01 | 26.582 |
| 9/24/2010 23:09:01 | 27.111 | 9/25/2010 20:49:01 | 26.645 |
| 9/24/2010 23:29:01 | 27.111 | 9/25/2010 21:09:01 | 26.645 |
| 9/24/2010 23:49:01 | 27.111 | 9/25/2010 21:29:01 | 26.645 |
| 9/25/2010 00:09:01 | 27.111 | 9/25/2010 21:49:01 | 26.707 |
| 9/25/2010 00:29:01 | 27.111 | 9/25/2010 22:09:01 | 26.707 |
| 9/25/2010 00:49:01 | 27.111 | 9/25/2010 22:29:01 | 26.707 |
| 9/25/2010 01:09:01 | 27.111 | 9/25/2010 22:49:01 | 26.707 |
| 9/25/2010 01:29:01 | 27.048 | 9/25/2010 23:09:01 | 26.77  |
| 9/25/2010 01:49:01 | 27.048 | 9/25/2010 23:29:01 | 26.77  |
| 9/25/2010 02:09:01 | 27.048 | 9/25/2010 23:49:01 | 26.77  |
| 9/25/2010 02:29:01 | 27.048 | 9/26/2010 00:09:01 | 26.77  |
| 9/25/2010 02:49:01 | 27.048 | 9/26/2010 00:29:01 | 26.77  |
| 9/25/2010 03:09:01 | 26.986 | 9/26/2010 00:49:01 | 26.832 |
| 9/25/2010 03:29:01 | 26.986 | 9/26/2010 01:09:01 | 26.832 |
| 9/25/2010 03:49:01 | 26.986 | 9/26/2010 01:29:01 | 26.832 |
| 9/25/2010 04:09:01 | 26.923 | 9/26/2010 01:49:01 | 26.832 |
| 9/25/2010 04:29:01 | 26.923 | 9/26/2010 02:09:01 | 26.832 |

|                    |        |                    |        |
|--------------------|--------|--------------------|--------|
| 9/25/2010 04:49:01 | 26.923 | 9/26/2010 02:29:01 | 26.832 |
| 9/25/2010 05:09:01 | 26.861 | 9/26/2010 02:49:01 | 26.832 |
| 9/25/2010 05:29:01 | 26.861 | 9/26/2010 03:09:01 | 26.832 |
| 9/25/2010 05:49:01 | 26.798 | 9/26/2010 03:29:01 | 26.832 |
| 9/25/2010 06:09:01 | 26.798 | 9/26/2010 03:49:01 | 26.832 |
| 9/25/2010 06:29:01 | 26.798 | 9/26/2010 04:09:01 | 26.832 |
| 9/25/2010 06:49:01 | 26.736 | 9/26/2010 04:29:01 | 26.832 |
| 9/25/2010 07:09:01 | 26.736 | 9/26/2010 04:49:01 | 26.832 |
| 9/25/2010 07:29:01 | 26.673 | 9/26/2010 05:09:01 | 26.832 |
| 9/25/2010 07:49:01 | 26.673 | 9/26/2010 05:29:01 | 26.832 |
| 9/25/2010 08:09:01 | 26.611 | 9/26/2010 05:49:01 | 26.832 |
| 9/25/2010 08:29:01 | 26.611 | 9/26/2010 06:09:01 | 26.77  |
| 9/25/2010 08:49:01 | 26.549 | 9/26/2010 06:29:01 | 26.77  |
| 9/25/2010 09:09:01 | 26.549 | 9/26/2010 06:49:01 | 26.77  |
| 9/25/2010 09:29:01 | 26.486 | 9/26/2010 07:09:01 | 26.77  |
| 9/25/2010 09:49:01 | 26.486 | 9/26/2010 07:29:01 | 26.77  |
| 9/25/2010 10:09:01 | 26.424 | 9/26/2010 07:49:01 | 26.707 |
| 9/25/2010 10:29:01 | 26.424 | 9/26/2010 08:09:01 | 26.707 |
| 9/25/2010 10:49:01 | 26.424 | 9/26/2010 08:29:01 | 26.707 |
| 9/25/2010 11:09:01 | 26.361 | 9/26/2010 08:49:01 | 26.707 |
| 9/25/2010 11:29:01 | 26.361 | 9/26/2010 09:09:01 | 26.707 |
| 9/25/2010 11:49:01 | 26.361 | 9/26/2010 09:29:01 | 26.645 |
| 9/25/2010 12:09:01 | 26.299 | 9/26/2010 09:49:01 | 26.645 |
| 9/25/2010 12:29:01 | 26.299 | 9/26/2010 10:09:01 | 26.645 |
| 9/25/2010 12:49:01 | 26.299 | 9/26/2010 10:29:01 | 26.582 |
| 9/25/2010 13:09:01 | 26.299 | 9/26/2010 10:49:01 | 26.582 |
| 9/25/2010 13:29:01 | 26.299 | 9/26/2010 11:09:01 | 26.582 |
| 9/25/2010 13:49:01 | 26.299 | 9/26/2010 11:29:01 | 26.52  |
| 9/25/2010 14:09:01 | 26.299 | 9/26/2010 11:49:01 | 26.52  |
| 9/25/2010 14:29:01 | 26.299 | 9/26/2010 12:09:01 | 26.52  |
| 9/25/2010 14:49:01 | 26.299 | 9/26/2010 12:29:01 | 26.52  |
| 9/25/2010 15:09:01 | 26.361 | 9/26/2010 12:49:01 | 26.457 |
| 9/25/2010 15:29:01 | 26.361 | 9/26/2010 13:09:01 | 26.457 |
| 9/25/2010 15:49:01 | 26.424 | 9/26/2010 13:29:01 | 26.457 |
| 9/25/2010 16:09:01 | 26.424 | 9/26/2010 13:49:01 | 26.457 |
| 9/25/2010 16:29:01 | 26.486 | 9/26/2010 14:09:01 | 26.395 |
| 9/25/2010 16:49:01 | 26.549 | 9/26/2010 14:29:01 | 26.395 |
| 9/25/2010 17:09:01 | 26.549 | 9/26/2010 14:49:01 | 26.395 |
| 9/25/2010 17:29:01 | 26.611 | 9/26/2010 15:09:01 | 26.395 |
| 9/25/2010 17:49:01 | 26.673 | 9/26/2010 15:29:01 | 26.395 |
| 9/25/2010 18:09:01 | 26.736 | 9/26/2010 15:49:01 | 26.395 |
| 9/25/2010 18:29:01 | 26.798 | 9/26/2010 16:09:01 | 26.395 |
| 9/25/2010 18:49:01 | 26.861 | 9/26/2010 16:29:01 | 26.395 |
| 9/25/2010 19:09:01 | 26.861 | 9/26/2010 16:49:01 | 26.395 |
| 9/25/2010 19:29:01 | 26.923 | 9/26/2010 17:09:01 | 26.395 |
| 9/25/2010 19:49:01 | 26.923 | 9/26/2010 17:29:01 | 26.395 |
| 9/25/2010 20:09:01 | 26.986 | 9/26/2010 17:49:01 | 26.457 |
| 9/25/2010 20:29:01 | 27.048 | 9/26/2010 18:09:01 | 26.457 |
| 9/25/2010 20:49:01 | 27.048 | 9/26/2010 18:29:01 | 26.457 |
| 9/25/2010 21:09:01 | 27.048 | 9/26/2010 18:49:01 | 26.457 |

|                    |        |                    |        |
|--------------------|--------|--------------------|--------|
| 9/25/2010 21:29:01 | 27.111 | 9/26/2010 19:09:01 | 26.52  |
| 9/25/2010 21:49:01 | 27.111 | 9/26/2010 19:29:01 | 26.52  |
| 9/25/2010 22:09:01 | 27.111 | 9/26/2010 19:49:01 | 26.52  |
| 9/25/2010 22:29:01 | 27.111 | 9/26/2010 20:09:01 | 26.52  |
| 9/25/2010 22:49:01 | 27.111 | 9/26/2010 20:29:01 | 26.582 |
| 9/25/2010 23:09:01 | 27.111 | 9/26/2010 20:49:01 | 26.582 |
| 9/25/2010 23:29:01 | 27.111 | 9/26/2010 21:09:01 | 26.582 |
| 9/25/2010 23:49:01 | 27.111 | 9/26/2010 21:29:01 | 26.645 |
| 9/26/2010 00:09:01 | 27.111 | 9/26/2010 21:49:01 | 26.645 |
| 9/26/2010 00:29:01 | 27.111 | 9/26/2010 22:09:01 | 26.645 |
| 9/26/2010 00:49:01 | 27.111 | 9/26/2010 22:29:01 | 26.707 |
| 9/26/2010 01:09:01 | 27.111 | 9/26/2010 22:49:01 | 26.707 |
| 9/26/2010 01:29:01 | 27.048 | 9/26/2010 23:09:01 | 26.707 |
| 9/26/2010 01:49:01 | 27.048 | 9/26/2010 23:29:01 | 26.707 |
| 9/26/2010 02:09:01 | 27.048 | 9/26/2010 23:49:01 | 26.77  |
| 9/26/2010 02:29:01 | 26.986 | 9/27/2010 00:09:01 | 26.77  |
| 9/26/2010 02:49:01 | 26.986 | 9/27/2010 00:29:01 | 26.77  |
| 9/26/2010 03:09:01 | 26.986 | 9/27/2010 00:49:01 | 26.77  |
| 9/26/2010 03:29:01 | 26.923 | 9/27/2010 01:09:01 | 26.77  |
| 9/26/2010 03:49:01 | 26.923 | 9/27/2010 01:29:01 | 26.77  |
| 9/26/2010 04:09:01 | 26.861 | 9/27/2010 01:49:01 | 26.832 |
| 9/26/2010 04:29:01 | 26.861 | 9/27/2010 02:09:01 | 26.832 |
| 9/26/2010 04:49:01 | 26.861 | 9/27/2010 02:29:01 | 26.832 |
| 9/26/2010 05:09:01 | 26.798 | 9/27/2010 02:49:01 | 26.832 |
| 9/26/2010 05:29:01 | 26.798 | 9/27/2010 03:09:01 | 26.832 |
| 9/26/2010 05:49:01 | 26.736 | 9/27/2010 03:29:01 | 26.832 |
| 9/26/2010 06:09:01 | 26.736 | 9/27/2010 03:49:01 | 26.832 |
| 9/26/2010 06:29:01 | 26.673 | 9/27/2010 04:09:01 | 26.832 |
| 9/26/2010 06:49:01 | 26.673 | 9/27/2010 04:29:01 | 26.832 |
| 9/26/2010 07:09:01 | 26.611 | 9/27/2010 04:49:01 | 26.832 |
| 9/26/2010 07:29:01 | 26.611 | 9/27/2010 05:09:01 | 26.832 |
| 9/26/2010 07:49:01 | 26.549 | 9/27/2010 05:29:01 | 26.832 |
| 9/26/2010 08:09:01 | 26.549 | 9/27/2010 05:49:01 | 26.832 |
| 9/26/2010 08:29:01 | 26.486 | 9/27/2010 06:09:01 | 26.832 |
| 9/26/2010 08:49:01 | 26.486 | 9/27/2010 06:29:01 | 26.77  |
| 9/26/2010 09:09:01 | 26.424 | 9/27/2010 06:49:01 | 26.77  |
| 9/26/2010 09:29:01 | 26.424 | 9/27/2010 07:09:01 | 26.77  |
| 9/26/2010 09:49:01 | 26.361 | 9/27/2010 07:29:01 | 26.77  |
| 9/26/2010 10:09:01 | 26.361 | 9/27/2010 07:49:01 | 26.77  |
| 9/26/2010 10:29:01 | 26.299 | 9/27/2010 08:09:01 | 26.707 |
| 9/26/2010 10:49:01 | 26.299 | 9/27/2010 08:29:01 | 26.707 |
| 9/26/2010 11:09:01 | 26.236 | 9/27/2010 08:49:01 | 26.707 |
| 9/26/2010 11:29:01 | 26.236 | 9/27/2010 09:09:01 | 26.707 |
| 9/26/2010 11:49:01 | 26.236 | 9/27/2010 09:29:01 | 26.645 |
| 9/26/2010 12:09:01 | 26.174 | 9/27/2010 09:49:01 | 26.645 |
| 9/26/2010 12:29:01 | 26.174 | 9/27/2010 10:09:01 | 26.645 |
| 9/26/2010 12:49:01 | 26.174 | 9/27/2010 10:29:01 | 26.645 |
| 9/26/2010 13:09:01 | 26.174 | 9/27/2010 10:49:01 | 26.582 |
| 9/26/2010 13:29:01 | 26.174 | 9/27/2010 11:09:01 | 26.582 |
| 9/26/2010 13:49:01 | 26.174 | 9/27/2010 11:29:01 | 26.582 |

|                    |        |                    |        |
|--------------------|--------|--------------------|--------|
| 9/26/2010 14:09:01 | 26.174 | 9/27/2010 11:49:01 | 26.52  |
| 9/26/2010 14:29:01 | 26.174 | 9/27/2010 12:09:01 | 26.52  |
| 9/26/2010 14:49:01 | 26.236 | 9/27/2010 12:29:01 | 26.52  |
| 9/26/2010 15:09:01 | 26.236 | 9/27/2010 12:49:01 | 26.52  |
| 9/26/2010 15:29:01 | 26.236 | 9/27/2010 13:09:01 | 26.457 |
| 9/26/2010 15:49:01 | 26.299 | 9/27/2010 13:29:01 | 26.457 |
| 9/26/2010 16:09:01 | 26.361 | 9/27/2010 13:49:01 | 26.457 |
| 9/26/2010 16:29:01 | 26.361 | 9/27/2010 14:09:01 | 26.457 |
| 9/26/2010 16:49:01 | 26.424 | 9/27/2010 14:29:01 | 26.457 |
| 9/26/2010 17:09:01 | 26.486 | 9/27/2010 14:49:01 | 26.395 |
| 9/26/2010 17:29:01 | 26.549 | 9/27/2010 15:09:01 | 26.395 |
| 9/26/2010 17:49:01 | 26.611 | 9/27/2010 15:29:01 | 26.395 |
| 9/26/2010 18:09:01 | 26.611 | 9/27/2010 15:49:01 | 26.395 |
| 9/26/2010 18:29:01 | 26.673 | 9/27/2010 16:09:01 | 26.395 |
| 9/26/2010 18:49:01 | 26.736 | 9/27/2010 16:29:01 | 26.395 |
| 9/26/2010 19:09:01 | 26.798 | 9/27/2010 16:49:01 | 26.395 |
| 9/26/2010 19:29:01 | 26.798 | 9/27/2010 17:09:01 | 26.457 |
| 9/26/2010 19:49:01 | 26.861 | 9/27/2010 17:29:01 | 26.457 |
| 9/26/2010 20:09:01 | 26.923 | 9/27/2010 17:49:01 | 26.457 |
| 9/26/2010 20:29:01 | 26.923 | 9/27/2010 18:09:01 | 26.457 |
| 9/26/2010 20:49:01 | 26.986 | 9/27/2010 18:29:01 | 26.457 |
| 9/26/2010 21:09:01 | 26.986 | 9/27/2010 18:49:01 | 26.52  |
| 9/26/2010 21:29:01 | 27.048 | 9/27/2010 19:09:01 | 26.52  |
| 9/26/2010 21:49:01 | 27.048 | 9/27/2010 19:29:01 | 26.52  |
| 9/26/2010 22:09:01 | 27.048 | 9/27/2010 19:49:01 | 26.582 |
| 9/26/2010 22:29:01 | 27.048 | 9/27/2010 20:09:01 | 26.582 |
| 9/26/2010 22:49:01 | 27.111 | 9/27/2010 20:29:01 | 26.582 |
| 9/26/2010 23:09:01 | 27.111 | 9/27/2010 20:49:01 | 26.645 |
| 9/26/2010 23:29:01 | 27.111 | 9/27/2010 21:09:01 | 26.645 |
| 9/26/2010 23:49:01 | 27.111 | 9/27/2010 21:29:01 | 26.645 |
| 9/27/2010 00:09:01 | 27.111 | 9/27/2010 21:49:01 | 26.707 |
| 9/27/2010 00:29:01 | 27.111 | 9/27/2010 22:09:01 | 26.707 |
| 9/27/2010 00:49:01 | 27.048 | 9/27/2010 22:29:01 | 26.707 |
| 9/27/2010 01:09:01 | 27.048 | 9/27/2010 22:49:01 | 26.77  |
| 9/27/2010 01:29:01 | 27.048 | 9/27/2010 23:09:01 | 26.77  |
| 9/27/2010 01:49:01 | 27.048 | 9/27/2010 23:29:01 | 26.77  |
| 9/27/2010 02:09:01 | 27.048 | 9/27/2010 23:49:01 | 26.77  |
| 9/27/2010 02:29:01 | 26.986 | 9/28/2010 00:09:01 | 26.77  |
| 9/27/2010 02:49:01 | 26.986 | 9/28/2010 00:29:01 | 26.832 |
| 9/27/2010 03:09:01 | 26.986 | 9/28/2010 00:49:01 | 26.832 |
| 9/27/2010 03:29:01 | 26.986 | 9/28/2010 01:09:01 | 26.832 |
| 9/27/2010 03:49:01 | 26.923 | 9/28/2010 01:29:01 | 26.832 |
| 9/27/2010 04:09:01 | 26.923 | 9/28/2010 01:49:01 | 26.832 |
| 9/27/2010 04:29:01 | 26.861 | 9/28/2010 02:09:01 | 26.832 |
| 9/27/2010 04:49:01 | 26.861 | 9/28/2010 02:29:01 | 26.832 |
| 9/27/2010 05:09:01 | 26.798 | 9/28/2010 02:49:01 | 26.832 |
| 9/27/2010 05:29:01 | 26.798 | 9/28/2010 03:09:01 | 26.832 |
| 9/27/2010 05:49:01 | 26.798 | 9/28/2010 03:29:01 | 26.832 |
| 9/27/2010 06:09:01 | 26.736 | 9/28/2010 03:49:01 | 26.832 |
| 9/27/2010 06:29:01 | 26.736 | 9/28/2010 04:09:01 | 26.832 |



|                    |        |                    |        |
|--------------------|--------|--------------------|--------|
| 9/27/2010 06:49:01 | 26.673 | 9/28/2010 04:29:01 | 26.832 |
| 9/27/2010 07:09:01 | 26.611 | 9/28/2010 04:49:01 | 26.832 |
| 9/27/2010 07:29:01 | 26.611 | 9/28/2010 05:09:01 | 26.832 |
| 9/27/2010 07:49:01 | 26.549 | 9/28/2010 05:29:01 | 26.832 |
| 9/27/2010 08:09:01 | 26.549 | 9/28/2010 05:49:01 | 26.832 |
| 9/27/2010 08:29:01 | 26.486 | 9/28/2010 06:09:01 | 26.832 |
| 9/27/2010 08:49:01 | 26.486 | 9/28/2010 06:29:01 | 26.832 |
| 9/27/2010 09:09:01 | 26.424 | 9/28/2010 06:49:01 | 26.77  |
| 9/27/2010 09:29:01 | 26.424 | 9/28/2010 07:09:01 | 26.77  |
| 9/27/2010 09:49:01 | 26.361 | 9/28/2010 07:29:01 | 26.77  |
| 9/27/2010 10:09:01 | 26.361 | 9/28/2010 07:49:01 | 26.77  |
| 9/27/2010 10:29:01 | 26.299 | 9/28/2010 08:09:01 | 26.77  |
| 9/27/2010 10:49:01 | 26.299 | 9/28/2010 08:29:01 | 26.77  |
| 9/27/2010 11:09:01 | 26.236 | 9/28/2010 08:49:01 | 26.707 |
| 9/27/2010 11:29:01 | 26.236 | 9/28/2010 09:09:01 | 26.707 |
| 9/27/2010 11:49:01 | 26.236 | 9/28/2010 09:29:01 | 26.707 |
| 9/27/2010 12:09:01 | 26.174 | 9/28/2010 09:49:01 | 26.645 |
| 9/27/2010 12:29:01 | 26.174 | 9/28/2010 10:09:01 | 26.645 |
| 9/27/2010 12:49:01 | 26.174 | 9/28/2010 10:29:01 | 26.645 |
| 9/27/2010 13:09:01 | 26.174 | 9/28/2010 10:49:01 | 26.582 |
| 9/27/2010 13:29:01 | 26.174 | 9/28/2010 11:09:01 | 26.582 |
| 9/27/2010 13:49:01 | 26.174 | 9/28/2010 11:29:01 | 26.582 |
| 9/27/2010 14:09:01 | 26.174 | 9/28/2010 11:49:01 | 26.582 |
| 9/27/2010 14:29:01 | 26.174 | 9/28/2010 12:09:01 | 26.52  |
| 9/27/2010 14:49:01 | 26.236 | 9/28/2010 12:29:01 | 26.52  |
| 9/27/2010 15:09:01 | 26.236 | 9/28/2010 12:49:01 | 26.52  |
| 9/27/2010 15:29:01 | 26.299 | 9/28/2010 13:09:01 | 26.457 |
| 9/27/2010 15:49:01 | 26.299 | 9/28/2010 13:29:01 | 26.457 |
| 9/27/2010 16:09:01 | 26.361 | 9/28/2010 13:49:01 | 26.457 |
| 9/27/2010 16:29:01 | 26.424 | 9/28/2010 14:09:01 | 26.457 |
| 9/27/2010 16:49:01 | 26.424 | 9/28/2010 14:29:01 | 26.457 |
| 9/27/2010 17:09:01 | 26.486 | 9/28/2010 14:49:01 | 26.395 |
| 9/27/2010 17:29:01 | 26.549 | 9/28/2010 15:09:01 | 26.395 |
| 9/27/2010 17:49:01 | 26.611 | 9/28/2010 15:29:01 | 26.395 |
| 9/27/2010 18:09:01 | 26.611 | 9/28/2010 15:49:01 | 26.395 |
| 9/27/2010 18:29:01 | 26.673 | 9/28/2010 16:09:01 | 26.395 |
| 9/27/2010 18:49:01 | 26.736 | 9/28/2010 16:29:01 | 26.395 |
| 9/27/2010 19:09:01 | 26.798 | 9/28/2010 16:49:01 | 26.395 |
| 9/27/2010 19:29:01 | 26.861 | 9/28/2010 17:09:01 | 26.457 |
| 9/27/2010 19:49:01 | 26.861 | 9/28/2010 17:29:01 | 26.457 |
| 9/27/2010 20:09:01 | 26.923 | 9/28/2010 17:49:01 | 26.457 |
| 9/27/2010 20:29:01 | 26.923 | 9/28/2010 18:09:01 | 26.457 |
| 9/27/2010 20:49:01 | 26.986 | 9/28/2010 18:29:01 | 26.457 |
| 9/27/2010 21:09:01 | 26.986 | 9/28/2010 18:49:01 | 26.52  |
| 9/27/2010 21:29:01 | 27.048 | 9/28/2010 19:09:01 | 26.52  |
| 9/27/2010 21:49:01 | 27.048 | 9/28/2010 19:29:01 | 26.52  |
| 9/27/2010 22:09:01 | 27.048 | 9/28/2010 19:49:01 | 26.582 |
| 9/27/2010 22:29:01 | 27.048 | 9/28/2010 20:09:01 | 26.582 |
| 9/27/2010 22:49:01 | 27.111 | 9/28/2010 20:29:01 | 26.582 |
| 9/27/2010 23:09:01 | 27.111 | 9/28/2010 20:49:01 | 26.645 |

|                    |        |                    |        |
|--------------------|--------|--------------------|--------|
| 9/27/2010 23:29:01 | 27.111 | 9/28/2010 21:09:01 | 26.645 |
| 9/27/2010 23:49:01 | 27.111 | 9/28/2010 21:29:01 | 26.645 |
| 9/28/2010 00:09:01 | 27.111 | 9/28/2010 21:49:01 | 26.707 |
| 9/28/2010 00:29:01 | 27.111 | 9/28/2010 22:09:01 | 26.707 |
| 9/28/2010 00:49:01 | 27.048 | 9/28/2010 22:29:01 | 26.707 |
| 9/28/2010 01:09:01 | 27.048 | 9/28/2010 22:49:01 | 26.77  |
| 9/28/2010 01:29:01 | 27.048 | 9/28/2010 23:09:01 | 26.77  |
| 9/28/2010 01:49:01 | 27.048 | 9/28/2010 23:29:01 | 26.77  |
| 9/28/2010 02:09:01 | 26.986 | 9/28/2010 23:49:01 | 26.77  |
| 9/28/2010 02:29:01 | 26.986 | 9/29/2010 00:09:01 | 26.832 |
| 9/28/2010 02:49:01 | 26.986 | 9/29/2010 00:29:01 | 26.832 |
| 9/28/2010 03:09:01 | 26.986 | 9/29/2010 00:49:01 | 26.832 |
| 9/28/2010 03:29:01 | 26.923 | 9/29/2010 01:09:01 | 26.832 |
| 9/28/2010 03:49:01 | 26.923 | 9/29/2010 01:29:01 | 26.832 |
| 9/28/2010 04:09:01 | 26.861 | 9/29/2010 01:49:01 | 26.832 |
| 9/28/2010 04:29:01 | 26.861 | 9/29/2010 02:09:01 | 26.895 |
| 9/28/2010 04:49:01 | 26.861 | 9/29/2010 02:29:01 | 26.895 |
| 9/28/2010 05:09:01 | 26.798 | 9/29/2010 02:49:01 | 26.895 |
| 9/28/2010 05:29:01 | 26.798 | 9/29/2010 03:09:01 | 26.895 |
| 9/28/2010 05:49:01 | 26.736 | 9/29/2010 03:29:01 | 26.895 |
| 9/28/2010 06:09:01 | 26.736 | 9/29/2010 03:49:01 | 26.895 |
| 9/28/2010 06:29:01 | 26.673 | 9/29/2010 04:09:01 | 26.895 |
| 9/28/2010 06:49:01 | 26.673 | 9/29/2010 04:29:01 | 26.895 |
| 9/28/2010 07:09:01 | 26.611 | 9/29/2010 04:49:01 | 26.895 |
| 9/28/2010 07:29:01 | 26.611 | 9/29/2010 05:09:01 | 26.895 |
| 9/28/2010 07:49:01 | 26.549 | 9/29/2010 05:29:01 | 26.895 |
| 9/28/2010 08:09:01 | 26.549 | 9/29/2010 05:49:01 | 26.832 |
| 9/28/2010 08:29:01 | 26.486 | 9/29/2010 06:09:01 | 26.832 |
| 9/28/2010 08:49:01 | 26.486 | 9/29/2010 06:29:01 | 26.832 |
| 9/28/2010 09:09:01 | 26.424 | 9/29/2010 06:49:01 | 26.832 |
| 9/28/2010 09:29:01 | 26.424 | 9/29/2010 07:09:01 | 26.832 |
| 9/28/2010 09:49:01 | 26.361 | 9/29/2010 07:29:01 | 26.832 |
| 9/28/2010 10:09:01 | 26.299 | 9/29/2010 07:49:01 | 26.832 |
| 9/28/2010 10:29:01 | 26.299 | 9/29/2010 08:09:01 | 26.77  |
| 9/28/2010 10:49:01 | 26.236 | 9/29/2010 08:29:01 | 26.77  |
| 9/28/2010 11:09:01 | 26.236 | 9/29/2010 08:49:01 | 26.77  |
| 9/28/2010 11:29:01 | 26.236 | 9/29/2010 09:09:01 | 26.77  |
| 9/28/2010 11:49:01 | 26.174 | 9/29/2010 09:29:01 | 26.707 |
| 9/28/2010 12:09:01 | 26.174 | 9/29/2010 09:49:01 | 26.707 |
| 9/28/2010 12:29:01 | 26.174 | 9/29/2010 10:09:01 | 26.707 |
| 9/28/2010 12:49:01 | 26.111 | 9/29/2010 10:29:01 | 26.707 |
| 9/28/2010 13:09:01 | 26.111 | 9/29/2010 10:49:01 | 26.645 |
| 9/28/2010 13:29:01 | 26.111 | 9/29/2010 11:09:01 | 26.645 |
| 9/28/2010 13:49:01 | 26.111 | 9/29/2010 11:29:01 | 26.645 |
| 9/28/2010 14:09:01 | 26.111 | 9/29/2010 11:49:01 | 26.582 |
| 9/28/2010 14:29:01 | 26.111 | 9/29/2010 12:09:01 | 26.582 |
| 9/28/2010 14:49:01 | 26.174 | 9/29/2010 12:29:01 | 26.582 |
| 9/28/2010 15:09:01 | 26.174 | 9/29/2010 12:49:01 | 26.582 |
| 9/28/2010 15:29:01 | 26.174 | 9/29/2010 13:09:01 | 26.52  |
| 9/28/2010 15:49:01 | 26.236 | 9/29/2010 13:29:01 | 26.52  |

|                    |        |                    |        |
|--------------------|--------|--------------------|--------|
| 9/28/2010 16:09:01 | 26.299 | 9/29/2010 13:49:01 | 26.52  |
| 9/28/2010 16:29:01 | 26.299 | 9/29/2010 14:09:01 | 26.52  |
| 9/28/2010 16:49:01 | 26.361 | 9/29/2010 14:29:01 | 26.52  |
| 9/28/2010 17:09:01 | 26.424 | 9/29/2010 14:49:01 | 26.52  |
| 9/28/2010 17:29:01 | 26.486 | 9/29/2010 15:09:01 | 26.52  |
| 9/28/2010 17:49:01 | 26.549 | 9/29/2010 15:29:01 | 26.52  |
| 9/28/2010 18:09:01 | 26.549 | 9/29/2010 15:49:01 | 26.457 |
| 9/28/2010 18:29:01 | 26.611 | 9/29/2010 16:09:01 | 26.52  |
| 9/28/2010 18:49:01 | 26.673 | 9/29/2010 16:29:01 | 26.52  |
| 9/28/2010 19:09:01 | 26.736 | 9/29/2010 16:49:01 | 26.52  |
| 9/28/2010 19:29:01 | 26.798 | 9/29/2010 17:09:01 | 26.52  |
| 9/28/2010 19:49:01 | 26.798 | 9/29/2010 17:29:01 | 26.52  |
| 9/28/2010 20:09:01 | 26.861 | 9/29/2010 17:49:01 | 26.52  |
| 9/28/2010 20:29:01 | 26.923 | 9/29/2010 18:09:01 | 26.52  |
| 9/28/2010 20:49:01 | 26.923 | 9/29/2010 18:29:01 | 26.582 |
| 9/28/2010 21:09:01 | 26.923 | 9/29/2010 18:49:01 | 26.582 |
| 9/28/2010 21:29:01 | 26.986 | 9/29/2010 19:09:01 | 26.582 |
| 9/28/2010 21:49:01 | 26.986 | 9/29/2010 19:29:01 | 26.645 |
| 9/28/2010 22:09:01 | 26.986 | 9/29/2010 19:49:01 | 26.645 |
| 9/28/2010 22:29:01 | 27.048 | 9/29/2010 20:09:01 | 26.645 |
| 9/28/2010 22:49:01 | 27.048 | 9/29/2010 20:29:01 | 26.645 |
| 9/28/2010 23:09:01 | 27.048 | 9/29/2010 20:49:01 | 26.707 |
| 9/28/2010 23:29:01 | 27.048 | 9/29/2010 21:09:01 | 26.707 |
| 9/28/2010 23:49:01 | 27.048 | 9/29/2010 21:29:01 | 26.707 |
| 9/29/2010 00:09:01 | 27.048 | 9/29/2010 21:49:01 | 26.77  |
| 9/29/2010 00:29:01 | 27.048 | 9/29/2010 22:09:01 | 26.77  |
| 9/29/2010 00:49:01 | 27.048 | 9/29/2010 22:29:01 | 26.77  |
| 9/29/2010 01:09:01 | 27.048 | 9/29/2010 22:49:01 | 26.832 |
| 9/29/2010 01:29:01 | 26.986 | 9/29/2010 23:09:01 | 26.832 |
| 9/29/2010 01:49:01 | 26.986 | 9/29/2010 23:29:01 | 26.832 |
| 9/29/2010 02:09:01 | 26.986 | 9/29/2010 23:49:01 | 26.832 |
| 9/29/2010 02:29:01 | 26.986 | 9/30/2010 00:09:01 | 26.832 |
| 9/29/2010 02:49:01 | 26.923 | 9/30/2010 00:29:01 | 26.895 |
| 9/29/2010 03:09:01 | 26.923 | 9/30/2010 00:49:01 | 26.895 |
| 9/29/2010 03:29:01 | 26.923 | 9/30/2010 01:09:01 | 26.895 |
| 9/29/2010 03:49:01 | 26.861 | 9/30/2010 01:29:01 | 26.895 |
| 9/29/2010 04:09:01 | 26.861 | 9/30/2010 01:49:01 | 26.895 |
| 9/29/2010 04:29:01 | 26.861 | 9/30/2010 02:09:01 | 26.895 |
| 9/29/2010 04:49:01 | 26.798 | 9/30/2010 02:29:01 | 26.895 |
| 9/29/2010 05:09:01 | 26.798 | 9/30/2010 02:49:01 | 26.895 |
| 9/29/2010 05:29:01 | 26.736 | 9/30/2010 03:09:01 | 26.957 |
| 9/29/2010 05:49:01 | 26.736 | 9/30/2010 03:29:01 | 26.957 |
| 9/29/2010 06:09:01 | 26.736 | 9/30/2010 03:49:01 | 26.895 |
| 9/29/2010 06:29:01 | 26.673 | 9/30/2010 04:09:01 | 26.957 |
| 9/29/2010 06:49:01 | 26.673 | 9/30/2010 04:29:01 | 26.895 |
| 9/29/2010 07:09:01 | 26.611 | 9/30/2010 04:49:01 | 26.957 |
| 9/29/2010 07:29:01 | 26.611 | 9/30/2010 05:09:01 | 26.895 |
| 9/29/2010 07:49:01 | 26.549 | 9/30/2010 05:29:01 | 26.895 |
| 9/29/2010 08:09:01 | 26.549 | 9/30/2010 05:49:01 | 26.895 |
| 9/29/2010 08:29:01 | 26.486 | 9/30/2010 06:09:01 | 26.895 |

|                    |        |                    |        |
|--------------------|--------|--------------------|--------|
| 9/29/2010 08:49:01 | 26.486 | 9/30/2010 06:29:01 | 26.895 |
| 9/29/2010 09:09:01 | 26.424 | 9/30/2010 06:49:01 | 26.895 |
| 9/29/2010 09:29:01 | 26.424 | 9/30/2010 07:09:01 | 26.895 |
| 9/29/2010 09:49:01 | 26.361 | 9/30/2010 07:29:01 | 26.895 |
| 9/29/2010 10:09:01 | 26.361 | 9/30/2010 07:49:01 | 26.832 |
| 9/29/2010 10:29:01 | 26.299 | 9/30/2010 08:09:01 | 26.832 |
| 9/29/2010 10:49:01 | 26.299 | 9/30/2010 08:29:01 | 26.832 |
| 9/29/2010 11:09:01 | 26.236 | 9/30/2010 08:49:01 | 26.832 |
| 9/29/2010 11:29:01 | 26.236 | 9/30/2010 09:09:01 | 26.832 |
| 9/29/2010 11:49:01 | 26.236 | 9/30/2010 09:29:01 | 26.77  |
| 9/29/2010 12:09:01 | 26.236 | 9/30/2010 09:49:01 | 26.77  |
| 9/29/2010 12:29:01 | 26.174 | 9/30/2010 10:09:01 | 26.77  |
| 9/29/2010 12:49:01 | 26.174 | 9/30/2010 10:29:01 | 26.77  |
| 9/29/2010 13:09:01 | 26.174 | 9/30/2010 10:49:01 | 26.707 |
| 9/29/2010 13:29:01 | 26.174 | 9/30/2010 11:09:01 | 26.707 |
| 9/29/2010 13:49:01 | 26.174 | 9/30/2010 11:29:01 | 26.707 |
| 9/29/2010 14:09:01 | 26.174 | 9/30/2010 11:49:01 | 26.707 |
| 9/29/2010 14:29:01 | 26.236 | 9/30/2010 12:09:01 | 26.645 |
| 9/29/2010 14:49:01 | 26.236 | 9/30/2010 12:29:01 | 26.645 |
| 9/29/2010 15:09:01 | 26.236 | 9/30/2010 12:49:01 | 26.645 |
| 9/29/2010 15:29:01 | 26.299 | 9/30/2010 13:09:01 | 26.645 |
| 9/29/2010 15:49:01 | 26.299 | 9/30/2010 13:29:01 | 26.645 |
| 9/29/2010 16:09:01 | 26.361 | 9/30/2010 13:49:01 | 26.582 |
| 9/29/2010 16:29:01 | 26.361 | 9/30/2010 14:09:01 | 26.582 |
| 9/29/2010 16:49:01 | 26.424 | 9/30/2010 14:29:01 | 26.582 |
| 9/29/2010 17:09:01 | 26.486 | 9/30/2010 14:49:01 | 26.582 |
| 9/29/2010 17:29:01 | 26.486 | 9/30/2010 15:09:01 | 26.582 |
| 9/29/2010 17:49:01 | 26.549 | 9/30/2010 15:29:01 | 26.582 |
| 9/29/2010 18:09:01 | 26.611 | 9/30/2010 15:49:01 | 26.582 |
| 9/29/2010 18:29:01 | 26.673 | 9/30/2010 16:09:01 | 26.582 |
| 9/29/2010 18:49:01 | 26.673 | 9/30/2010 16:29:01 | 26.582 |
| 9/29/2010 19:09:01 | 26.736 | 9/30/2010 16:49:01 | 26.582 |
| 9/29/2010 19:29:01 | 26.798 | 9/30/2010 17:09:01 | 26.645 |
| 9/29/2010 19:49:01 | 26.798 | 9/30/2010 17:29:01 | 26.645 |
| 9/29/2010 20:09:01 | 26.861 | 9/30/2010 17:49:01 | 26.645 |
| 9/29/2010 20:29:01 | 26.861 | 9/30/2010 18:09:01 | 26.707 |
| 9/29/2010 20:49:01 | 26.923 | 9/30/2010 18:29:01 | 26.707 |
| 9/29/2010 21:09:01 | 26.923 | 9/30/2010 18:49:01 | 26.707 |
| 9/29/2010 21:29:01 | 26.923 | 9/30/2010 19:09:01 | 26.77  |
| 9/29/2010 21:49:01 | 26.986 | 9/30/2010 19:29:01 | 26.77  |
| 9/29/2010 22:09:01 | 26.986 | 9/30/2010 19:49:01 | 26.77  |
| 9/29/2010 22:29:01 | 26.986 | 9/30/2010 20:09:01 | 26.832 |
| 9/29/2010 22:49:01 | 26.986 | 9/30/2010 20:29:01 | 26.832 |
| 9/29/2010 23:09:01 | 26.986 | 9/30/2010 20:49:01 | 26.895 |
| 9/29/2010 23:29:01 | 26.986 | 9/30/2010 21:09:01 | 26.895 |
| 9/29/2010 23:49:01 | 26.986 | 9/30/2010 21:29:01 | 26.895 |
| 9/30/2010 00:09:01 | 26.986 | 9/30/2010 21:49:01 | 26.957 |
| 9/30/2010 00:29:01 | 26.986 | 9/30/2010 22:09:01 | 26.957 |
| 9/30/2010 00:49:01 | 26.986 | 9/30/2010 22:29:01 | 26.957 |
| 9/30/2010 01:09:01 | 26.986 | 9/30/2010 22:49:01 | 27.019 |

|                    |        |                    |        |
|--------------------|--------|--------------------|--------|
| 9/30/2010 01:29:01 | 26.986 | 9/30/2010 23:09:01 | 27.019 |
| 9/30/2010 01:49:01 | 26.986 | 9/30/2010 23:29:01 | 27.019 |
| 9/30/2010 02:09:01 | 26.986 | 9/30/2010 23:49:01 | 27.082 |
| 9/30/2010 02:29:01 | 26.923 | 10/1/2010 00:09:01 | 27.082 |
| 9/30/2010 02:49:01 | 26.923 | 10/1/2010 00:29:01 | 27.082 |
| 9/30/2010 03:09:01 | 26.923 | 10/1/2010 00:49:01 | 27.082 |
| 9/30/2010 03:29:01 | 26.861 | 10/1/2010 01:09:01 | 27.082 |
| 9/30/2010 03:49:01 | 26.861 | 10/1/2010 01:29:01 | 27.144 |
| 9/30/2010 04:09:01 | 26.861 | 10/1/2010 01:49:01 | 27.144 |
| 9/30/2010 04:29:01 | 26.798 | 10/1/2010 02:09:01 | 27.144 |
| 9/30/2010 04:49:01 | 26.798 | 10/1/2010 02:29:01 | 27.144 |
| 9/30/2010 05:09:01 | 26.798 | 10/1/2010 02:49:01 | 27.144 |
| 9/30/2010 05:29:01 | 26.736 | 10/1/2010 03:09:01 | 27.144 |
| 9/30/2010 05:49:01 | 26.736 | 10/1/2010 03:29:01 | 27.144 |
| 9/30/2010 06:09:01 | 26.736 | 10/1/2010 03:49:01 | 27.144 |
| 9/30/2010 06:29:01 | 26.673 | 10/1/2010 04:09:01 | 27.144 |
| 9/30/2010 06:49:01 | 26.673 | 10/1/2010 04:29:01 | 27.144 |
| 9/30/2010 07:09:01 | 26.611 | 10/1/2010 04:49:01 | 27.144 |
| 9/30/2010 07:29:01 | 26.611 | 10/1/2010 05:09:01 | 27.144 |
| 9/30/2010 07:49:01 | 26.611 | 10/1/2010 05:29:01 | 27.144 |
| 9/30/2010 08:09:01 | 26.549 | 10/1/2010 05:49:01 | 27.144 |
| 9/30/2010 08:29:01 | 26.549 | 10/1/2010 06:09:01 | 27.144 |
| 9/30/2010 08:49:01 | 26.486 | 10/1/2010 06:29:01 | 27.144 |
| 9/30/2010 09:09:01 | 26.486 | 10/1/2010 06:49:01 | 27.144 |
| 9/30/2010 09:29:01 | 26.424 | 10/1/2010 07:09:01 | 27.082 |
| 9/30/2010 09:49:01 | 26.424 | 10/1/2010 07:29:01 | 27.082 |
| 9/30/2010 10:09:01 | 26.361 | 10/1/2010 07:49:01 | 27.082 |
| 9/30/2010 10:29:01 | 26.361 | 10/1/2010 08:09:01 | 27.082 |
| 9/30/2010 10:49:01 | 26.361 | 10/1/2010 08:29:01 | 27.082 |
| 9/30/2010 11:09:01 | 26.299 | 10/1/2010 08:49:01 | 27.082 |
| 9/30/2010 11:29:01 | 26.299 | 10/1/2010 09:09:01 | 27.019 |
| 9/30/2010 11:49:01 | 26.299 | 10/1/2010 09:29:01 | 27.019 |
| 9/30/2010 12:09:01 | 26.236 | 10/1/2010 09:49:01 | 27.019 |
| 9/30/2010 12:29:01 | 26.236 | 10/1/2010 10:09:01 | 27.019 |
| 9/30/2010 12:49:01 | 26.236 | 10/1/2010 10:29:01 | 27.019 |
| 9/30/2010 13:09:01 | 26.236 | 10/1/2010 10:49:01 | 26.957 |
| 9/30/2010 13:29:01 | 26.236 | 10/1/2010 11:09:01 | 26.957 |
| 9/30/2010 13:49:01 | 26.236 | 10/1/2010 11:29:01 | 26.957 |
| 9/30/2010 14:09:01 | 26.299 | 10/1/2010 11:49:01 | 26.957 |
| 9/30/2010 14:29:01 | 26.299 | 10/1/2010 12:09:01 | 26.895 |
| 9/30/2010 14:49:01 | 26.299 | 10/1/2010 12:29:01 | 26.895 |
| 9/30/2010 15:09:01 | 26.299 | 10/1/2010 12:49:01 | 26.895 |
| 9/30/2010 15:29:01 | 26.361 | 10/1/2010 13:09:01 | 26.895 |
| 9/30/2010 15:49:01 | 26.424 | 10/1/2010 13:29:01 | 26.895 |
| 9/30/2010 16:09:01 | 26.424 | 10/1/2010 13:49:01 | 26.832 |
| 9/30/2010 16:29:01 | 26.486 | 10/1/2010 14:09:01 | 26.832 |
| 9/30/2010 16:49:01 | 26.549 | 10/1/2010 14:29:01 | 26.832 |
| 9/30/2010 17:09:01 | 26.611 | 10/1/2010 14:49:01 | 26.832 |
| 9/30/2010 17:29:01 | 26.611 | 10/1/2010 15:09:01 | 26.832 |
| 9/30/2010 17:49:01 | 26.673 | 10/1/2010 15:29:01 | 26.832 |

|                    |        |                    |        |
|--------------------|--------|--------------------|--------|
| 9/30/2010 18:09:01 | 26.736 | 10/1/2010 15:49:01 | 26.832 |
| 9/30/2010 18:29:01 | 26.798 | 10/1/2010 16:09:01 | 26.832 |
| 9/30/2010 18:49:01 | 26.861 | 10/1/2010 16:29:01 | 26.895 |
| 9/30/2010 19:09:01 | 26.861 | 10/1/2010 16:49:01 | 26.895 |
| 9/30/2010 19:29:01 | 26.923 | 10/1/2010 17:09:01 | 26.895 |
| 9/30/2010 19:49:01 | 26.986 | 10/1/2010 17:29:01 | 26.895 |
| 9/30/2010 20:09:01 | 26.986 | 10/1/2010 17:49:01 | 26.957 |
| 9/30/2010 20:29:01 | 27.048 | 10/1/2010 18:09:01 | 26.957 |
| 9/30/2010 20:49:01 | 27.111 | 10/1/2010 18:29:01 | 26.957 |
| 9/30/2010 21:09:01 | 27.111 | 10/1/2010 18:49:01 | 27.019 |
| 9/30/2010 21:29:01 | 27.111 | 10/1/2010 19:09:01 | 27.019 |
| 9/30/2010 21:49:01 | 27.173 | 10/1/2010 19:29:01 | 27.019 |
| 9/30/2010 22:09:01 | 27.173 | 10/1/2010 19:49:01 | 27.082 |
| 9/30/2010 22:29:01 | 27.173 | 10/1/2010 20:09:01 | 27.082 |
| 9/30/2010 22:49:01 | 27.173 | 10/1/2010 20:29:01 | 27.144 |
| 9/30/2010 23:09:01 | 27.173 | 10/1/2010 20:49:01 | 27.144 |
| 9/30/2010 23:29:01 | 27.173 | 10/1/2010 21:09:01 | 27.144 |
| 9/30/2010 23:49:01 | 27.173 | 10/1/2010 21:29:01 | 27.207 |
| 10/1/2010 00:09:01 | 27.173 | 10/1/2010 21:49:01 | 27.207 |
| 10/1/2010 00:29:01 | 27.173 | 10/1/2010 22:09:01 | 27.269 |
| 10/1/2010 00:49:01 | 27.173 | 10/1/2010 22:29:01 | 27.269 |
| 10/1/2010 01:09:01 | 27.173 | 10/1/2010 22:49:01 | 27.269 |
| 10/1/2010 01:29:01 | 27.173 | 10/1/2010 23:09:01 | 27.269 |
| 10/1/2010 01:49:01 | 27.111 | 10/1/2010 23:29:01 | 27.332 |
| 10/1/2010 02:09:01 | 27.111 | 10/1/2010 23:49:01 | 27.332 |
| 10/1/2010 02:29:01 | 27.111 | 10/2/2010 00:09:01 | 27.332 |
| 10/1/2010 02:49:01 | 27.111 | 10/2/2010 00:29:01 | 27.332 |
| 10/1/2010 03:09:01 | 27.111 | 10/2/2010 00:49:01 | 27.394 |
| 10/1/2010 03:29:01 | 27.048 | 10/2/2010 01:09:01 | 27.394 |
| 10/1/2010 03:49:01 | 27.048 | 10/2/2010 01:29:01 | 27.394 |
| 10/1/2010 04:09:01 | 27.048 | 10/2/2010 01:49:01 | 27.394 |
| 10/1/2010 04:29:01 | 26.986 | 10/2/2010 02:09:01 | 27.394 |
| 10/1/2010 04:49:01 | 26.986 | 10/2/2010 02:29:01 | 27.394 |
| 10/1/2010 05:09:01 | 26.986 | 10/2/2010 02:49:01 | 27.394 |
| 10/1/2010 05:29:01 | 26.923 | 10/2/2010 03:09:01 | 27.394 |
| 10/1/2010 05:49:01 | 26.923 | 10/2/2010 03:29:01 | 27.394 |
| 10/1/2010 06:09:01 | 26.923 | 10/2/2010 03:49:01 | 27.394 |
| 10/1/2010 06:29:01 | 26.861 | 10/2/2010 04:09:01 | 27.394 |
| 10/1/2010 06:49:01 | 26.861 | 10/2/2010 04:29:01 | 27.394 |
| 10/1/2010 07:09:01 | 26.861 | 10/2/2010 04:49:01 | 27.394 |
| 10/1/2010 07:29:01 | 26.798 | 10/2/2010 05:09:01 | 27.394 |
| 10/1/2010 07:49:01 | 26.798 | 10/2/2010 05:29:01 | 27.394 |
| 10/1/2010 08:09:01 | 26.798 | 10/2/2010 05:49:01 | 27.394 |
| 10/1/2010 08:29:01 | 26.736 | 10/2/2010 06:09:01 | 27.394 |
| 10/1/2010 08:49:01 | 26.736 | 10/2/2010 06:29:01 | 27.394 |
| 10/1/2010 09:09:01 | 26.673 | 10/2/2010 06:49:01 | 27.332 |
| 10/1/2010 09:29:01 | 26.673 | 10/2/2010 07:09:01 | 27.332 |
| 10/1/2010 09:49:01 | 26.673 | 10/2/2010 07:29:01 | 27.332 |
| 10/1/2010 10:09:01 | 26.611 | 10/2/2010 07:49:01 | 27.332 |
| 10/1/2010 10:29:01 | 26.611 | 10/2/2010 08:09:01 | 27.332 |

|                    |        |                    |        |
|--------------------|--------|--------------------|--------|
| 10/1/2010 10:49:01 | 26.611 | 10/2/2010 08:29:01 | 27.269 |
| 10/1/2010 11:09:01 | 26.549 | 10/2/2010 08:49:01 | 27.269 |
| 10/1/2010 11:29:01 | 26.549 | 10/2/2010 09:09:01 | 27.269 |
| 10/1/2010 11:49:01 | 26.549 | 10/2/2010 09:29:01 | 27.269 |
| 10/1/2010 12:09:01 | 26.549 | 10/2/2010 09:49:01 | 27.207 |
| 10/1/2010 12:29:01 | 26.549 | 10/2/2010 10:09:01 | 27.207 |
| 10/1/2010 12:49:01 | 26.549 | 10/2/2010 10:29:01 | 27.207 |
| 10/1/2010 13:09:01 | 26.549 | 10/2/2010 10:49:01 | 27.144 |
| 10/1/2010 13:29:01 | 26.549 | 10/2/2010 11:09:01 | 27.144 |
| 10/1/2010 13:49:01 | 26.549 | 10/2/2010 11:29:01 | 27.144 |
| 10/1/2010 14:09:01 | 26.549 | 10/2/2010 11:49:01 | 27.082 |
| 10/1/2010 14:29:01 | 26.549 | 10/2/2010 12:09:01 | 27.082 |
| 10/1/2010 14:49:01 | 26.611 | 10/2/2010 12:29:01 | 27.082 |
| 10/1/2010 15:09:01 | 26.611 | 10/2/2010 12:49:01 | 27.082 |
| 10/1/2010 15:29:01 | 26.673 | 10/2/2010 13:09:01 | 27.019 |
| 10/1/2010 15:49:01 | 26.673 | 10/2/2010 13:29:01 | 27.019 |
| 10/1/2010 16:09:01 | 26.736 | 10/2/2010 13:49:01 | 27.019 |
| 10/1/2010 16:29:01 | 26.798 | 10/2/2010 14:09:01 | 26.957 |
| 10/1/2010 16:49:01 | 26.798 | 10/2/2010 14:29:01 | 26.957 |
| 10/1/2010 17:09:01 | 26.861 | 10/2/2010 14:49:01 | 26.957 |
| 10/1/2010 17:29:01 | 26.923 | 10/2/2010 15:09:01 | 26.957 |
| 10/1/2010 17:49:01 | 26.986 | 10/2/2010 15:29:01 | 26.957 |
| 10/1/2010 18:09:01 | 27.048 | 10/2/2010 15:49:01 | 26.957 |
| 10/1/2010 18:29:01 | 27.111 | 10/2/2010 16:09:01 | 26.957 |
| 10/1/2010 18:49:01 | 27.111 | 10/2/2010 16:29:01 | 26.957 |
| 10/1/2010 19:09:01 | 27.173 | 10/2/2010 16:49:01 | 26.957 |
| 10/1/2010 19:29:01 | 27.236 | 10/2/2010 17:09:01 | 27.019 |
| 10/1/2010 19:49:01 | 27.298 | 10/2/2010 17:29:01 | 27.019 |
| 10/1/2010 20:09:01 | 27.298 | 10/2/2010 17:49:01 | 27.019 |
| 10/1/2010 20:29:01 | 27.361 | 10/2/2010 18:09:01 | 27.019 |
| 10/1/2010 20:49:01 | 27.361 | 10/2/2010 18:29:01 | 27.082 |
| 10/1/2010 21:09:01 | 27.423 | 10/2/2010 18:49:01 | 27.082 |
| 10/1/2010 21:29:01 | 27.423 | 10/2/2010 19:09:01 | 27.082 |
| 10/1/2010 21:49:01 | 27.423 | 10/2/2010 19:29:01 | 27.144 |
| 10/1/2010 22:09:01 | 27.423 | 10/2/2010 19:49:01 | 27.144 |
| 10/1/2010 22:29:01 | 27.486 | 10/2/2010 20:09:01 | 27.144 |
| 10/1/2010 22:49:01 | 27.486 | 10/2/2010 20:29:01 | 27.207 |
| 10/1/2010 23:09:01 | 27.486 | 10/2/2010 20:49:01 | 27.207 |
| 10/1/2010 23:29:01 | 27.486 | 10/2/2010 21:09:01 | 27.269 |
| 10/1/2010 23:49:01 | 27.486 | 10/2/2010 21:29:01 | 27.269 |
| 10/2/2010 00:09:01 | 27.423 | 10/2/2010 21:49:01 | 27.269 |
| 10/2/2010 00:29:01 | 27.423 | 10/2/2010 22:09:01 | 27.269 |
| 10/2/2010 00:49:01 | 27.423 | 10/2/2010 22:29:01 | 27.332 |
| 10/2/2010 01:09:01 | 27.423 | 10/2/2010 22:49:01 | 27.332 |
| 10/2/2010 01:29:01 | 27.423 | 10/2/2010 23:09:01 | 27.332 |
| 10/2/2010 01:49:01 | 27.423 | 10/2/2010 23:29:01 | 27.394 |
| 10/2/2010 02:09:01 | 27.423 | 10/2/2010 23:49:01 | 27.394 |
| 10/2/2010 02:29:01 | 27.361 | 10/3/2010 00:09:01 | 27.394 |
| 10/2/2010 02:49:01 | 27.361 | 10/3/2010 00:29:01 | 27.394 |
| 10/2/2010 03:09:01 | 27.361 | 10/3/2010 00:49:01 | 27.394 |

|                    |        |                    |        |
|--------------------|--------|--------------------|--------|
| 10/2/2010 03:29:01 | 27.298 | 10/3/2010 01:09:01 | 27.457 |
| 10/2/2010 03:49:01 | 27.298 | 10/3/2010 01:29:01 | 27.457 |
| 10/2/2010 04:09:01 | 27.298 | 10/3/2010 01:49:01 | 27.457 |
| 10/2/2010 04:29:01 | 27.236 | 10/3/2010 02:09:01 | 27.457 |
| 10/2/2010 04:49:01 | 27.236 | 10/3/2010 02:29:01 | 27.457 |
| 10/2/2010 05:09:01 | 27.173 | 10/3/2010 02:49:01 | 27.457 |
| 10/2/2010 05:29:01 | 27.173 | 10/3/2010 03:09:01 | 27.457 |
| 10/2/2010 05:49:01 | 27.111 | 10/3/2010 03:29:01 | 27.457 |
| 10/2/2010 06:09:01 | 27.111 | 10/3/2010 03:49:01 | 27.457 |
| 10/2/2010 06:29:01 | 27.048 | 10/3/2010 04:09:01 | 27.457 |
| 10/2/2010 06:49:01 | 27.048 | 10/3/2010 04:29:01 | 27.457 |
| 10/2/2010 07:09:01 | 26.986 | 10/3/2010 04:49:01 | 27.457 |
| 10/2/2010 07:29:01 | 26.986 | 10/3/2010 05:09:01 | 27.457 |
| 10/2/2010 07:49:01 | 26.923 | 10/3/2010 05:29:01 | 27.457 |
| 10/2/2010 08:09:01 | 26.923 | 10/3/2010 05:49:01 | 27.457 |
| 10/2/2010 08:29:01 | 26.861 | 10/3/2010 06:09:01 | 27.457 |
| 10/2/2010 08:49:01 | 26.861 | 10/3/2010 06:29:01 | 27.457 |
| 10/2/2010 09:09:01 | 26.798 | 10/3/2010 06:49:01 | 27.394 |
| 10/2/2010 09:29:01 | 26.798 | 10/3/2010 07:09:01 | 27.394 |
| 10/2/2010 09:49:01 | 26.736 | 10/3/2010 07:29:01 | 27.394 |
| 10/2/2010 10:09:01 | 26.736 | 10/3/2010 07:49:01 | 27.394 |
| 10/2/2010 10:29:01 | 26.673 | 10/3/2010 08:09:01 | 27.394 |
| 10/2/2010 10:49:01 | 26.673 | 10/3/2010 08:29:01 | 27.332 |
| 10/2/2010 11:09:01 | 26.611 | 10/3/2010 08:49:01 | 27.332 |
| 10/2/2010 11:29:01 | 26.611 | 10/3/2010 09:09:01 | 27.332 |
| 10/2/2010 11:49:01 | 26.611 | 10/3/2010 09:29:01 | 27.332 |
| 10/2/2010 12:09:01 | 26.549 | 10/3/2010 09:49:01 | 27.332 |
| 10/2/2010 12:29:01 | 26.549 | 10/3/2010 10:09:01 | 27.269 |
| 10/2/2010 12:49:01 | 26.549 | 10/3/2010 10:29:01 | 27.269 |
| 10/2/2010 13:09:01 | 26.549 | 10/3/2010 10:49:01 | 27.269 |
| 10/2/2010 13:29:01 | 26.549 | 10/3/2010 11:09:01 | 27.207 |
| 10/2/2010 13:49:01 | 26.549 | 10/3/2010 11:29:01 | 27.207 |
| 10/2/2010 14:09:01 | 26.549 | 10/3/2010 11:49:01 | 27.207 |
| 10/2/2010 14:29:01 | 26.549 | 10/3/2010 12:09:01 | 27.144 |
| 10/2/2010 14:49:01 | 26.611 | 10/3/2010 12:29:01 | 27.144 |
| 10/2/2010 15:09:01 | 26.611 | 10/3/2010 12:49:01 | 27.144 |
| 10/2/2010 15:29:01 | 26.673 | 10/3/2010 13:09:01 | 27.144 |
| 10/2/2010 15:49:01 | 26.673 | 10/3/2010 13:29:01 | 27.082 |
| 10/2/2010 16:09:01 | 26.736 | 10/3/2010 13:49:01 | 27.082 |
| 10/2/2010 16:29:01 | 26.736 | 10/3/2010 14:09:01 | 27.082 |
| 10/2/2010 16:49:01 | 26.798 | 10/3/2010 14:29:01 | 27.082 |
| 10/2/2010 17:09:01 | 26.861 | 10/3/2010 14:49:01 | 27.082 |
| 10/2/2010 17:29:01 | 26.923 | 10/3/2010 15:09:01 | 27.082 |
| 10/2/2010 17:49:01 | 26.986 | 10/3/2010 15:29:01 | 27.082 |
| 10/2/2010 18:09:01 | 26.986 | 10/3/2010 15:49:01 | 27.082 |
| 10/2/2010 18:29:01 | 27.048 | 10/3/2010 16:09:01 | 27.082 |
| 10/2/2010 18:49:01 | 27.111 | 10/3/2010 16:29:01 | 27.082 |
| 10/2/2010 19:09:01 | 27.173 | 10/3/2010 16:49:01 | 27.082 |
| 10/2/2010 19:29:01 | 27.173 | 10/3/2010 17:09:01 | 27.144 |
| 10/2/2010 19:49:01 | 27.236 | 10/3/2010 17:29:01 | 27.144 |



|                    |        |                    |        |
|--------------------|--------|--------------------|--------|
| 10/2/2010 20:09:01 | 27.298 | 10/3/2010 17:49:01 | 27.144 |
| 10/2/2010 20:29:01 | 27.298 | 10/3/2010 18:09:01 | 27.144 |
| 10/2/2010 20:49:01 | 27.361 | 10/3/2010 18:29:01 | 27.207 |
| 10/2/2010 21:09:01 | 27.361 | 10/3/2010 18:49:01 | 27.207 |
| 10/2/2010 21:29:01 | 27.361 | 10/3/2010 19:09:01 | 27.207 |
| 10/2/2010 21:49:01 | 27.423 | 10/3/2010 19:29:01 | 27.269 |
| 10/2/2010 22:09:01 | 27.423 | 10/3/2010 19:49:01 | 27.269 |
| 10/2/2010 22:29:01 | 27.423 | 10/3/2010 20:09:01 | 27.269 |
| 10/2/2010 22:49:01 | 27.423 | 10/3/2010 20:29:01 | 27.332 |
| 10/2/2010 23:09:01 | 27.423 | 10/3/2010 20:49:01 | 27.332 |
| 10/2/2010 23:29:01 | 27.423 | 10/3/2010 21:09:01 | 27.394 |
| 10/2/2010 23:49:01 | 27.423 | 10/3/2010 21:29:01 | 27.394 |
| 10/3/2010 00:09:01 | 27.423 | 10/3/2010 21:49:01 | 27.394 |
| 10/3/2010 00:29:01 | 27.423 | 10/3/2010 22:09:01 | 27.457 |
| 10/3/2010 00:49:01 | 27.423 | 10/3/2010 22:29:01 | 27.457 |
| 10/3/2010 01:09:01 | 27.423 | 10/3/2010 22:49:01 | 27.457 |
| 10/3/2010 01:29:01 | 27.423 | 10/3/2010 23:09:01 | 27.519 |
| 10/3/2010 01:49:01 | 27.423 | 10/3/2010 23:29:01 | 27.519 |
| 10/3/2010 02:09:01 | 27.423 | 10/3/2010 23:49:01 | 27.519 |
| 10/3/2010 02:29:01 | 27.361 | 10/4/2010 00:09:01 | 27.582 |
| 10/3/2010 02:49:01 | 27.361 | 10/4/2010 00:29:01 | 27.582 |
| 10/3/2010 03:09:01 | 27.361 | 10/4/2010 00:49:01 | 27.582 |
| 10/3/2010 03:29:01 | 27.361 | 10/4/2010 01:09:01 | 27.582 |
| 10/3/2010 03:49:01 | 27.298 | 10/4/2010 01:29:01 | 27.582 |
| 10/3/2010 04:09:01 | 27.298 | 10/4/2010 01:49:01 | 27.582 |
| 10/3/2010 04:29:01 | 27.298 | 10/4/2010 02:09:01 | 27.644 |
| 10/3/2010 04:49:01 | 27.236 | 10/4/2010 02:29:01 | 27.644 |
| 10/3/2010 05:09:01 | 27.236 | 10/4/2010 02:49:01 | 27.644 |
| 10/3/2010 05:29:01 | 27.236 | 10/4/2010 03:09:01 | 27.644 |
| 10/3/2010 05:49:01 | 27.173 | 10/4/2010 03:29:01 | 27.644 |
| 10/3/2010 06:09:01 | 27.173 | 10/4/2010 03:49:01 | 27.644 |
| 10/3/2010 06:29:01 | 27.173 | 10/4/2010 04:09:01 | 27.644 |
| 10/3/2010 06:49:01 | 27.111 | 10/4/2010 04:29:01 | 27.644 |
| 10/3/2010 07:09:01 | 27.111 | 10/4/2010 04:49:01 | 27.644 |
| 10/3/2010 07:29:01 | 27.048 | 10/4/2010 05:09:01 | 27.644 |
| 10/3/2010 07:49:01 | 27.048 | 10/4/2010 05:29:01 | 27.644 |
| 10/3/2010 08:09:01 | 26.986 | 10/4/2010 05:49:01 | 27.644 |
| 10/3/2010 08:29:01 | 26.986 | 10/4/2010 06:09:01 | 27.644 |
| 10/3/2010 08:49:01 | 26.923 | 10/4/2010 06:29:01 | 27.644 |
| 10/3/2010 09:09:01 | 26.923 | 10/4/2010 06:49:01 | 27.644 |
| 10/3/2010 09:29:01 | 26.861 | 10/4/2010 07:09:01 | 27.644 |
| 10/3/2010 09:49:01 | 26.861 | 10/4/2010 07:29:01 | 27.582 |
| 10/3/2010 10:09:01 | 26.798 | 10/4/2010 07:49:01 | 27.582 |
| 10/3/2010 10:29:01 | 26.798 | 10/4/2010 08:09:01 | 27.582 |
| 10/3/2010 10:49:01 | 26.798 | 10/4/2010 08:29:01 | 27.582 |
| 10/3/2010 11:09:01 | 26.736 | 10/4/2010 08:49:01 | 27.582 |
| 10/3/2010 11:29:01 | 26.736 | 10/4/2010 09:09:01 | 27.519 |
| 10/3/2010 11:49:01 | 26.673 | 10/4/2010 09:29:01 | 27.519 |
| 10/3/2010 12:09:01 | 26.673 | 10/4/2010 09:49:01 | 27.519 |
| 10/3/2010 12:29:01 | 26.673 | 10/4/2010 10:09:01 | 27.519 |

|                    |        |                    |        |
|--------------------|--------|--------------------|--------|
| 10/3/2010 12:49:01 | 26.673 | 10/4/2010 10:29:01 | 27.519 |
| 10/3/2010 13:09:01 | 26.673 | 10/4/2010 10:49:01 | 27.457 |
| 10/3/2010 13:29:01 | 26.673 | 10/4/2010 11:09:01 | 27.457 |
| 10/3/2010 13:49:01 | 26.673 | 10/4/2010 11:29:01 | 27.457 |
| 10/3/2010 14:09:01 | 26.673 | 10/4/2010 11:49:01 | 27.394 |
| 10/3/2010 14:29:01 | 26.673 | 10/4/2010 12:09:01 | 27.394 |
| 10/3/2010 14:49:01 | 26.736 | 10/4/2010 12:29:01 | 27.394 |
| 10/3/2010 15:09:01 | 26.736 | 10/4/2010 12:49:01 | 27.394 |
| 10/3/2010 15:29:01 | 26.798 | 10/4/2010 13:09:01 | 27.332 |
| 10/3/2010 15:49:01 | 26.798 | 10/4/2010 13:29:01 | 27.332 |
| 10/3/2010 16:09:01 | 26.861 | 10/4/2010 13:49:01 | 27.332 |
| 10/3/2010 16:29:01 | 26.923 | 10/4/2010 14:09:01 | 27.332 |
| 10/3/2010 16:49:01 | 26.923 | 10/4/2010 14:29:01 | 27.332 |
| 10/3/2010 17:09:01 | 26.986 | 10/4/2010 14:49:01 | 27.332 |
| 10/3/2010 17:29:01 | 27.048 | 10/4/2010 15:09:01 | 27.332 |
| 10/3/2010 17:49:01 | 27.111 | 10/4/2010 15:29:01 | 27.332 |
| 10/3/2010 18:09:01 | 27.173 | 10/4/2010 15:49:01 | 27.332 |
| 10/3/2010 18:29:01 | 27.173 | 10/4/2010 16:09:01 | 27.332 |
| 10/3/2010 18:49:01 | 27.236 | 10/4/2010 16:29:01 | 27.332 |
| 10/3/2010 19:09:01 | 27.298 | 10/4/2010 16:49:01 | 27.332 |
| 10/3/2010 19:29:01 | 27.361 | 10/4/2010 17:09:01 | 27.394 |
| 10/3/2010 19:49:01 | 27.423 | 10/4/2010 17:29:01 | 27.394 |
| 10/3/2010 20:09:01 | 27.423 | 10/4/2010 17:49:01 | 27.394 |
| 10/3/2010 20:29:01 | 27.486 | 10/4/2010 18:09:01 | 27.457 |
| 10/3/2010 20:49:01 | 27.486 | 10/4/2010 18:29:01 | 27.457 |
| 10/3/2010 21:09:01 | 27.548 | 10/4/2010 18:49:01 | 27.457 |
| 10/3/2010 21:29:01 | 27.548 | 10/4/2010 19:09:01 | 27.457 |
| 10/3/2010 21:49:01 | 27.548 | 10/4/2010 19:29:01 | 27.519 |
| 10/3/2010 22:09:01 | 27.611 | 10/4/2010 19:49:01 | 27.519 |
| 10/3/2010 22:29:01 | 27.611 | 10/4/2010 20:09:01 | 27.582 |
| 10/3/2010 22:49:01 | 27.611 | 10/4/2010 20:29:01 | 27.582 |
| 10/3/2010 23:09:01 | 27.611 | 10/4/2010 20:49:01 | 27.582 |
| 10/3/2010 23:29:01 | 27.673 | 10/4/2010 21:09:01 | 27.644 |
| 10/3/2010 23:49:01 | 27.673 | 10/4/2010 21:29:01 | 27.644 |
| 10/4/2010 00:09:01 | 27.673 | 10/4/2010 21:49:01 | 27.644 |
| 10/4/2010 00:29:01 | 27.673 | 10/4/2010 22:09:01 | 27.707 |
| 10/4/2010 00:49:01 | 27.673 | 10/4/2010 22:29:01 | 27.707 |
| 10/4/2010 01:09:01 | 27.673 | 10/4/2010 22:49:01 | 27.707 |
| 10/4/2010 01:29:01 | 27.673 | 10/4/2010 23:09:01 | 27.769 |
| 10/4/2010 01:49:01 | 27.673 | 10/4/2010 23:29:01 | 27.769 |
| 10/4/2010 02:09:01 | 27.673 | 10/4/2010 23:49:01 | 27.769 |
| 10/4/2010 02:29:01 | 27.611 | 10/5/2010 00:09:01 | 27.769 |
| 10/4/2010 02:49:01 | 27.611 | 10/5/2010 00:29:01 | 27.769 |
| 10/4/2010 03:09:01 | 27.611 | 10/5/2010 00:49:01 | 27.769 |
| 10/4/2010 03:29:01 | 27.611 | 10/5/2010 01:09:01 | 27.832 |
| 10/4/2010 03:49:01 | 27.611 | 10/5/2010 01:29:01 | 27.832 |
| 10/4/2010 04:09:01 | 27.548 | 10/5/2010 01:49:01 | 27.832 |
| 10/4/2010 04:29:01 | 27.548 | 10/5/2010 02:09:01 | 27.832 |
| 10/4/2010 04:49:01 | 27.548 | 10/5/2010 02:29:01 | 27.832 |
| 10/4/2010 05:09:01 | 27.486 | 10/5/2010 02:49:01 | 27.832 |

|                    |        |                    |        |
|--------------------|--------|--------------------|--------|
| 10/4/2010 05:29:01 | 27.486 | 10/5/2010 03:09:01 | 27.832 |
| 10/4/2010 05:49:01 | 27.486 | 10/5/2010 03:29:01 | 27.832 |
| 10/4/2010 06:09:01 | 27.423 | 10/5/2010 03:49:01 | 27.832 |
| 10/4/2010 06:29:01 | 27.423 | 10/5/2010 04:09:01 | 27.832 |
| 10/4/2010 06:49:01 | 27.423 | 10/5/2010 04:29:01 | 27.832 |
| 10/4/2010 07:09:01 | 27.361 | 10/5/2010 04:49:01 | 27.832 |
| 10/4/2010 07:29:01 | 27.361 | 10/5/2010 05:09:01 | 27.832 |
| 10/4/2010 07:49:01 | 27.298 | 10/5/2010 05:29:01 | 27.769 |
| 10/4/2010 08:09:01 | 27.298 | 10/5/2010 05:49:01 | 27.769 |
| 10/4/2010 08:29:01 | 27.236 | 10/5/2010 06:09:01 | 27.769 |
| 10/4/2010 08:49:01 | 27.236 | 10/5/2010 06:29:01 | 27.769 |
| 10/4/2010 09:09:01 | 27.236 | 10/5/2010 06:49:01 | 27.769 |
| 10/4/2010 09:29:01 | 27.173 | 10/5/2010 07:09:01 | 27.769 |
| 10/4/2010 09:49:01 | 27.173 | 10/5/2010 07:29:01 | 27.707 |
| 10/4/2010 10:09:01 | 27.111 | 10/5/2010 07:49:01 | 27.707 |
| 10/4/2010 10:29:01 | 27.111 | 10/5/2010 08:09:01 | 27.707 |
| 10/4/2010 10:49:01 | 27.111 | 10/5/2010 08:29:01 | 27.707 |
| 10/4/2010 11:09:01 | 27.048 | 10/5/2010 08:49:01 | 27.707 |
| 10/4/2010 11:29:01 | 27.048 | 10/5/2010 09:09:01 | 27.644 |
| 10/4/2010 11:49:01 | 27.048 | 10/5/2010 09:29:01 | 27.644 |
| 10/4/2010 12:09:01 | 26.986 | 10/5/2010 09:49:01 | 27.644 |
| 10/4/2010 12:29:01 | 26.986 | 10/5/2010 10:09:01 | 27.644 |
| 10/4/2010 12:49:01 | 26.986 | 10/5/2010 10:29:01 | 27.582 |
| 10/4/2010 13:09:01 | 26.986 | 10/5/2010 10:49:01 | 27.582 |
| 10/4/2010 13:29:01 | 26.986 | 10/5/2010 11:09:01 | 27.582 |
| 10/4/2010 13:49:01 | 26.986 | 10/5/2010 11:29:01 | 27.519 |
| 10/4/2010 14:09:01 | 27.048 | 10/5/2010 11:49:01 | 27.519 |
| 10/4/2010 14:29:01 | 27.048 | 10/5/2010 12:09:01 | 27.519 |
| 10/4/2010 14:49:01 | 27.048 | 10/5/2010 12:29:01 | 27.519 |
| 10/4/2010 15:09:01 | 27.111 | 10/5/2010 12:49:01 | 27.457 |
| 10/4/2010 15:29:01 | 27.111 | 10/5/2010 13:09:01 | 27.457 |
| 10/4/2010 15:49:01 | 27.173 | 10/5/2010 13:29:01 | 27.457 |
| 10/4/2010 16:09:01 | 27.173 | 10/5/2010 13:49:01 | 27.457 |
| 10/4/2010 16:29:01 | 27.236 | 10/5/2010 14:09:01 | 27.457 |
| 10/4/2010 16:49:01 | 27.298 | 10/5/2010 14:29:01 | 27.457 |
| 10/4/2010 17:09:01 | 27.298 | 10/5/2010 14:49:01 | 27.394 |
| 10/4/2010 17:29:01 | 27.361 | 10/5/2010 15:09:01 | 27.394 |
| 10/4/2010 17:49:01 | 27.423 | 10/5/2010 15:29:01 | 27.394 |
| 10/4/2010 18:09:01 | 27.486 | 10/5/2010 15:49:01 | 27.394 |
| 10/4/2010 18:29:01 | 27.486 | 10/5/2010 16:09:01 | 27.457 |
| 10/4/2010 18:49:01 | 27.548 | 10/5/2010 16:29:01 | 27.457 |
| 10/4/2010 19:09:01 | 27.611 | 10/5/2010 16:49:01 | 27.457 |
| 10/4/2010 19:29:01 | 27.611 | 10/5/2010 17:09:01 | 27.457 |
| 10/4/2010 19:49:01 | 27.673 | 10/5/2010 17:29:01 | 27.457 |
| 10/4/2010 20:09:01 | 27.735 | 10/5/2010 17:49:01 | 27.519 |
| 10/4/2010 20:29:01 | 27.735 | 10/5/2010 18:09:01 | 27.519 |
| 10/4/2010 20:49:01 | 27.735 | 10/5/2010 18:29:01 | 27.519 |
| 10/4/2010 21:09:01 | 27.798 | 10/5/2010 18:49:01 | 27.519 |
| 10/4/2010 21:29:01 | 27.798 | 10/5/2010 19:09:01 | 27.582 |
| 10/4/2010 21:49:01 | 27.798 | 10/5/2010 19:29:01 | 27.582 |

|                    |        |                    |        |
|--------------------|--------|--------------------|--------|
| 10/4/2010 22:09:01 | 27.86  | 10/5/2010 19:49:01 | 27.582 |
| 10/4/2010 22:29:01 | 27.86  | 10/5/2010 20:09:01 | 27.644 |
| 10/4/2010 22:49:01 | 27.86  | 10/5/2010 20:29:01 | 27.644 |
| 10/4/2010 23:09:01 | 27.86  | 10/5/2010 20:49:01 | 27.707 |
| 10/4/2010 23:29:01 | 27.86  | 10/5/2010 21:09:01 | 27.707 |
| 10/4/2010 23:49:01 | 27.86  | 10/5/2010 21:29:01 | 27.707 |
| 10/5/2010 00:09:01 | 27.86  | 10/5/2010 21:49:01 | 27.769 |
| 10/5/2010 00:29:01 | 27.798 | 10/5/2010 22:09:01 | 27.769 |
| 10/5/2010 00:49:01 | 27.798 | 10/5/2010 22:29:01 | 27.769 |
| 10/5/2010 01:09:01 | 27.798 | 10/5/2010 22:49:01 | 27.769 |
| 10/5/2010 01:29:01 | 27.798 | 10/5/2010 23:09:01 | 27.832 |
| 10/5/2010 01:49:01 | 27.798 | 10/5/2010 23:29:01 | 27.832 |
| 10/5/2010 02:09:01 | 27.798 | 10/5/2010 23:49:01 | 27.832 |
| 10/5/2010 02:29:01 | 27.735 | 10/6/2010 00:09:01 | 27.832 |
| 10/5/2010 02:49:01 | 27.735 | 10/6/2010 00:29:01 | 27.832 |
| 10/5/2010 03:09:01 | 27.735 | 10/6/2010 00:49:01 | 27.894 |
| 10/5/2010 03:29:01 | 27.735 | 10/6/2010 01:09:01 | 27.894 |
| 10/5/2010 03:49:01 | 27.673 | 10/6/2010 01:29:01 | 27.894 |
| 10/5/2010 04:09:01 | 27.673 | 10/6/2010 01:49:01 | 27.894 |
| 10/5/2010 04:29:01 | 27.673 | 10/6/2010 02:09:01 | 27.894 |
| 10/5/2010 04:49:01 | 27.611 | 10/6/2010 02:29:01 | 27.894 |
| 10/5/2010 05:09:01 | 27.611 | 10/6/2010 02:49:01 | 27.894 |
| 10/5/2010 05:29:01 | 27.611 | 10/6/2010 03:09:01 | 27.894 |
| 10/5/2010 05:49:01 | 27.548 | 10/6/2010 03:29:01 | 27.894 |
| 10/5/2010 06:09:01 | 27.548 | 10/6/2010 03:49:01 | 27.894 |
| 10/5/2010 06:29:01 | 27.548 | 10/6/2010 04:09:01 | 27.894 |
| 10/5/2010 06:49:01 | 27.486 | 10/6/2010 04:29:01 | 27.894 |
| 10/5/2010 07:09:01 | 27.486 | 10/6/2010 04:49:01 | 27.894 |
| 10/5/2010 07:29:01 | 27.423 | 10/6/2010 05:09:01 | 27.894 |
| 10/5/2010 07:49:01 | 27.423 | 10/6/2010 05:29:01 | 27.894 |
| 10/5/2010 08:09:01 | 27.423 | 10/6/2010 05:49:01 | 27.832 |
| 10/5/2010 08:29:01 | 27.361 | 10/6/2010 06:09:01 | 27.832 |
| 10/5/2010 08:49:01 | 27.361 | 10/6/2010 06:29:01 | 27.832 |
| 10/5/2010 09:09:01 | 27.298 | 10/6/2010 06:49:01 | 27.832 |
| 10/5/2010 09:29:01 | 27.298 | 10/6/2010 07:09:01 | 27.832 |
| 10/5/2010 09:49:01 | 27.236 | 10/6/2010 07:29:01 | 27.832 |
| 10/5/2010 10:09:01 | 27.236 | 10/6/2010 07:49:01 | 27.769 |
| 10/5/2010 10:29:01 | 27.236 | 10/6/2010 08:09:01 | 27.769 |
| 10/5/2010 10:49:01 | 27.173 | 10/6/2010 08:24:01 | 27.738 |
| 10/5/2010 11:09:01 | 27.173 | 10/6/2010 08:44:01 | 27.675 |
| 10/5/2010 11:29:01 | 27.173 | 10/6/2010 09:04:01 | 27.675 |
| 10/5/2010 11:49:01 | 27.111 | 10/6/2010 09:24:01 | 27.675 |
| 10/5/2010 12:09:01 | 27.111 | 10/6/2010 09:44:01 | 27.675 |
| 10/5/2010 12:29:01 | 27.111 | 10/6/2010 10:04:01 | 27.675 |
| 10/5/2010 12:49:01 | 27.111 | 10/6/2010 10:24:01 | 27.613 |
| 10/5/2010 13:09:01 | 27.111 | 10/6/2010 10:44:01 | 27.613 |
| 10/5/2010 13:29:01 | 27.111 | 10/6/2010 11:04:01 | 27.613 |
| 10/5/2010 13:49:01 | 27.111 | 10/6/2010 11:24:01 | 27.613 |
| 10/5/2010 14:09:01 | 27.173 | 10/6/2010 11:44:01 | 27.55  |
| 10/5/2010 14:29:01 | 27.173 | 10/6/2010 12:04:01 | 27.55  |

|                    |        |                    |        |
|--------------------|--------|--------------------|--------|
| 10/5/2010 14:49:01 | 27.173 | 10/6/2010 12:24:01 | 27.55  |
| 10/5/2010 15:09:01 | 27.236 | 10/6/2010 12:44:01 | 27.488 |
| 10/5/2010 15:29:01 | 27.236 | 10/6/2010 13:04:01 | 27.488 |
| 10/5/2010 15:49:01 | 27.298 | 10/6/2010 13:24:01 | 27.488 |
| 10/5/2010 16:09:01 | 27.298 | 10/6/2010 13:44:01 | 27.488 |
| 10/5/2010 16:29:01 | 27.361 | 10/6/2010 14:04:01 | 27.488 |
| 10/5/2010 16:49:01 | 27.423 | 10/6/2010 14:24:01 | 27.488 |
| 10/5/2010 17:09:01 | 27.423 | 10/6/2010 14:44:01 | 27.488 |
| 10/5/2010 17:29:01 | 27.486 | 10/6/2010 15:04:01 | 27.488 |
| 10/5/2010 17:49:01 | 27.548 | 10/6/2010 15:24:01 | 27.488 |
| 10/5/2010 18:09:01 | 27.548 | 10/6/2010 15:44:01 | 27.488 |
| 10/5/2010 18:29:01 | 27.611 | 10/6/2010 16:04:01 | 27.488 |
| 10/5/2010 18:49:01 | 27.673 | 10/6/2010 16:24:01 | 27.488 |
| 10/5/2010 19:09:01 | 27.673 | 10/6/2010 16:44:01 | 27.55  |
| 10/5/2010 19:29:01 | 27.735 | 10/6/2010 17:04:01 | 27.55  |
| 10/5/2010 19:49:01 | 27.798 | 10/6/2010 17:24:01 | 27.55  |
| 10/5/2010 20:09:01 | 27.798 | 10/6/2010 17:44:01 | 27.613 |
| 10/5/2010 20:29:01 | 27.86  | 10/6/2010 18:04:01 | 27.613 |
| 10/5/2010 20:49:01 | 27.86  | 10/6/2010 18:24:01 | 27.613 |
| 10/5/2010 21:09:01 | 27.86  | 10/6/2010 18:44:01 | 27.675 |
| 10/5/2010 21:29:01 | 27.923 | 10/6/2010 19:04:01 | 27.675 |
| 10/5/2010 21:49:01 | 27.923 | 10/6/2010 19:24:01 | 27.738 |
| 10/5/2010 22:09:01 | 27.923 | 10/6/2010 19:44:01 | 27.738 |
| 10/5/2010 22:29:01 | 27.923 | 10/6/2010 20:04:01 | 27.738 |
| 10/5/2010 22:49:01 | 27.923 | 10/6/2010 20:24:01 | 27.8   |
| 10/5/2010 23:09:01 | 27.923 | 10/6/2010 20:44:01 | 27.8   |
| 10/5/2010 23:29:01 | 27.923 | 10/6/2010 21:04:01 | 27.863 |
| 10/5/2010 23:49:01 | 27.923 | 10/6/2010 21:24:01 | 27.863 |
| 10/6/2010 00:09:01 | 27.923 | 10/6/2010 21:44:01 | 27.863 |
| 10/6/2010 00:29:01 | 27.923 | 10/6/2010 22:04:01 | 27.925 |
| 10/6/2010 00:49:01 | 27.923 | 10/6/2010 22:24:01 | 27.925 |
| 10/6/2010 01:09:01 | 27.923 | 10/6/2010 22:44:01 | 27.987 |
| 10/6/2010 01:29:01 | 27.86  | 10/6/2010 23:04:01 | 27.987 |
| 10/6/2010 01:49:01 | 27.86  | 10/6/2010 23:24:01 | 27.987 |
| 10/6/2010 02:09:01 | 27.86  | 10/6/2010 23:44:01 | 27.987 |
| 10/6/2010 02:29:01 | 27.86  | 10/7/2010 00:04:01 | 28.05  |
| 10/6/2010 02:49:01 | 27.798 | 10/7/2010 00:24:01 | 28.05  |
| 10/6/2010 03:09:01 | 27.798 | 10/7/2010 00:44:01 | 28.05  |
| 10/6/2010 03:29:01 | 27.798 | 10/7/2010 01:04:01 | 28.05  |
| 10/6/2010 03:49:01 | 27.735 | 10/7/2010 01:24:01 | 28.05  |
| 10/6/2010 04:09:01 | 27.735 | 10/7/2010 01:44:01 | 28.05  |
| 10/6/2010 04:29:01 | 27.735 | 10/7/2010 02:04:01 | 28.05  |
| 10/6/2010 04:49:01 | 27.673 | 10/7/2010 02:24:01 | 28.112 |
| 10/6/2010 05:09:01 | 27.673 | 10/7/2010 02:44:01 | 28.112 |
| 10/6/2010 05:29:01 | 27.673 | 10/7/2010 03:04:01 | 28.112 |
| 10/6/2010 05:49:01 | 27.611 | 10/7/2010 03:24:01 | 28.112 |
| 10/6/2010 06:09:01 | 27.611 | 10/7/2010 03:44:01 | 28.05  |
| 10/6/2010 06:29:01 | 27.611 | 10/7/2010 04:04:01 | 28.112 |
| 10/6/2010 06:49:01 | 27.548 | 10/7/2010 04:24:01 | 28.112 |
| 10/6/2010 07:09:01 | 27.548 | 10/7/2010 04:44:01 | 28.05  |

|                    |         |                    |        |
|--------------------|---------|--------------------|--------|
| 10/6/2010 07:29:01 | 27.548  | 10/7/2010 05:04:01 | 28.05  |
| 10/6/2010 07:49:01 | 27.486  | 10/7/2010 05:24:01 | 28.05  |
| 10/6/2010 08:09:01 | 27.486  | 10/7/2010 05:44:01 | 28.05  |
| 10/6/2010 08:29:01 | 27.423  | 10/7/2010 06:04:01 | 28.05  |
| 10/6/2010 08:49:01 | 24.5503 | 10/7/2010 06:24:01 | 28.05  |
| 10/6/2010 09:09:01 | 24.5503 | 10/7/2010 06:44:01 | 28.05  |
| 10/6/2010 09:29:01 | 24.5503 | 10/7/2010 07:04:01 | 28.05  |
| 10/6/2010 09:49:01 | 24.4883 | 10/7/2010 07:24:01 | 27.987 |
| 10/6/2010 10:09:01 | 24.4883 | 10/7/2010 07:44:01 | 27.987 |
| 10/6/2010 10:29:01 | 24.4883 | 10/7/2010 08:04:01 | 27.987 |
| 10/6/2010 10:49:01 | 24.4883 | 10/7/2010 08:24:01 | 27.987 |
| 10/6/2010 11:09:01 | 24.4883 | 10/7/2010 08:44:01 | 27.925 |
| 10/6/2010 11:29:01 | 24.4883 | 10/7/2010 09:04:01 | 27.925 |
| 10/6/2010 11:49:01 | 24.4883 | 10/7/2010 09:24:01 | 27.925 |
| 10/6/2010 12:09:01 | 24.4883 | 10/7/2010 09:44:01 | 27.925 |
| 10/6/2010 12:29:01 | 24.4883 | 10/7/2010 10:04:01 | 27.863 |
| 10/6/2010 12:49:01 | 24.4883 | 10/7/2010 10:24:01 | 27.863 |
| 10/6/2010 13:09:01 | 24.4883 | 10/7/2010 10:44:01 | 27.863 |
| 10/6/2010 13:29:01 | 24.5503 | 10/7/2010 11:04:01 | 27.863 |
| 10/6/2010 13:49:01 | 24.5503 | 10/7/2010 11:24:01 | 27.8   |
| 10/6/2010 14:09:01 | 24.5503 | 10/7/2010 11:44:01 | 27.8   |
| 10/6/2010 14:29:01 | 24.5503 | 10/7/2010 12:04:01 | 27.8   |
| 10/6/2010 14:49:01 | 24.6133 | 10/7/2010 12:24:01 | 27.8   |
| 10/6/2010 15:09:01 | 24.6133 | 10/7/2010 12:44:01 | 27.738 |
| 10/6/2010 15:29:01 | 24.6753 | 10/7/2010 13:04:01 | 27.738 |
| 10/6/2010 15:49:01 | 24.6753 | 10/7/2010 13:24:01 | 27.738 |
| 10/6/2010 16:09:01 | 24.7383 | 10/7/2010 13:44:01 | 27.738 |
| 10/6/2010 16:29:01 | 24.7383 | 10/7/2010 14:04:01 | 27.738 |
| 10/6/2010 16:49:01 | 24.8003 | 10/7/2010 14:24:01 | 27.738 |
| 10/6/2010 17:09:01 | 24.8003 | 10/7/2010 14:44:01 | 27.738 |
| 10/6/2010 17:29:01 | 24.8633 | 10/7/2010 15:04:01 | 27.738 |
| 10/6/2010 17:49:01 | 24.8633 | 10/7/2010 15:24:01 | 27.738 |
| 10/6/2010 18:09:01 | 24.9253 | 10/7/2010 15:44:01 | 27.738 |
| 10/6/2010 18:29:01 | 24.9253 | 10/7/2010 16:04:01 | 27.738 |
| 10/6/2010 18:49:01 | 24.9253 | 10/7/2010 16:24:01 | 27.738 |
| 10/6/2010 19:09:01 | 24.9883 | 10/7/2010 16:44:01 | 27.738 |
| 10/6/2010 19:29:01 | 24.9883 | 10/7/2010 17:04:01 | 27.8   |
| 10/6/2010 19:49:01 | 24.9883 | 10/7/2010 17:24:01 | 27.8   |
| 10/6/2010 20:09:01 | 25.0503 | 10/7/2010 17:44:01 | 27.8   |
| 10/6/2010 20:29:01 | 25.0503 | 10/7/2010 18:04:01 | 27.863 |
| 10/6/2010 20:49:01 | 25.0503 | 10/7/2010 18:24:01 | 27.863 |
| 10/6/2010 21:09:01 | 25.0503 | 10/7/2010 18:44:01 | 27.863 |
| 10/6/2010 21:29:01 | 25.1133 | 10/7/2010 19:04:01 | 27.925 |
| 10/6/2010 21:49:01 | 25.1133 | 10/7/2010 19:24:01 | 27.925 |
| 10/6/2010 22:09:01 | 25.1133 | 10/7/2010 19:44:01 | 27.987 |
| 10/6/2010 22:29:01 | 25.1133 | 10/7/2010 20:04:01 | 27.987 |
| 10/6/2010 22:49:01 | 25.1133 | 10/7/2010 20:24:01 | 27.987 |
| 10/6/2010 23:09:01 | 25.1133 | 10/7/2010 20:44:01 | 28.05  |
| 10/6/2010 23:29:01 | 25.1133 | 10/7/2010 21:04:01 | 28.05  |
| 10/6/2010 23:49:01 | 25.1133 | 10/7/2010 21:24:01 | 28.112 |

|                    |         |                    |        |
|--------------------|---------|--------------------|--------|
| 10/7/2010 00:09:01 | 25.1133 | 10/7/2010 21:44:01 | 28.112 |
| 10/7/2010 00:29:01 | 25.1133 | 10/7/2010 22:04:01 | 28.175 |
| 10/7/2010 00:49:01 | 25.1133 | 10/7/2010 22:24:01 | 28.175 |
| 10/7/2010 01:09:01 | 25.1133 | 10/7/2010 22:44:01 | 28.175 |
| 10/7/2010 01:29:01 | 25.1133 | 10/7/2010 23:04:01 | 28.175 |
| 10/7/2010 01:49:01 | 25.0503 | 10/7/2010 23:24:01 | 28.237 |
| 10/7/2010 02:09:01 | 25.0503 | 10/7/2010 23:44:01 | 28.237 |
| 10/7/2010 02:29:01 | 25.0503 | 10/8/2010 00:04:01 | 28.237 |
| 10/7/2010 02:49:01 | 25.0503 | 10/8/2010 00:24:01 | 28.237 |
| 10/7/2010 03:09:01 | 25.0503 | 10/8/2010 00:44:01 | 28.3   |
| 10/7/2010 03:29:01 | 25.0503 | 10/8/2010 01:04:01 | 28.3   |
| 10/7/2010 03:49:01 | 24.9883 | 10/8/2010 01:24:01 | 28.3   |
| 10/7/2010 04:09:01 | 24.9883 | 10/8/2010 01:44:01 | 28.3   |
| 10/7/2010 04:29:01 | 24.9883 | 10/8/2010 02:04:01 | 28.3   |
| 10/7/2010 04:49:01 | 24.9883 | 10/8/2010 02:24:01 | 28.3   |
| 10/7/2010 05:09:01 | 24.9883 | 10/8/2010 02:44:01 | 28.3   |
| 10/7/2010 05:29:01 | 24.9883 | 10/8/2010 03:04:01 | 28.3   |
| 10/7/2010 05:49:01 | 24.9253 | 10/8/2010 03:24:01 | 28.3   |
| 10/7/2010 06:09:01 | 24.9253 | 10/8/2010 03:44:01 | 28.3   |
| 10/7/2010 06:29:01 | 24.9253 | 10/8/2010 04:04:01 | 28.3   |
| 10/7/2010 06:49:01 | 24.9253 | 10/8/2010 04:24:01 | 28.3   |
| 10/7/2010 07:09:01 | 24.8633 | 10/8/2010 04:44:01 | 28.3   |
| 10/7/2010 07:29:01 | 24.8633 | 10/8/2010 05:04:01 | 28.3   |
| 10/7/2010 07:49:01 | 24.8633 | 10/8/2010 05:24:01 | 28.3   |
| 10/7/2010 08:09:01 | 24.8633 | 10/8/2010 05:44:01 | 28.3   |
| 10/7/2010 08:29:01 | 24.8003 | 10/8/2010 06:04:01 | 28.3   |
| 10/7/2010 08:49:01 | 24.8003 | 10/8/2010 06:24:01 | 28.237 |
| 10/7/2010 09:09:01 | 24.8003 | 10/8/2010 06:44:01 | 28.237 |
| 10/7/2010 09:29:01 | 24.8003 | 10/8/2010 07:04:01 | 28.237 |
| 10/7/2010 09:49:01 | 24.8003 | 10/8/2010 07:24:01 | 28.237 |
| 10/7/2010 10:09:01 | 24.7383 | 10/8/2010 07:44:01 | 28.237 |
| 10/7/2010 10:29:01 | 24.7383 | 10/8/2010 08:04:01 | 28.175 |
| 10/7/2010 10:49:01 | 24.7383 | 10/8/2010 08:24:01 | 28.175 |
| 10/7/2010 11:09:01 | 24.7383 | 10/8/2010 08:44:01 | 28.175 |
| 10/7/2010 11:29:01 | 24.7383 | 10/8/2010 09:04:01 | 28.175 |
| 10/7/2010 11:49:01 | 24.7383 | 10/8/2010 09:24:01 | 28.175 |
| 10/7/2010 12:09:01 | 24.7383 | 10/8/2010 09:44:01 | 28.112 |
| 10/7/2010 12:29:01 | 24.7383 | 10/8/2010 10:04:01 | 28.112 |
| 10/7/2010 12:49:01 | 24.7383 | 10/8/2010 10:24:01 | 28.112 |
| 10/7/2010 13:09:01 | 24.7383 | 10/8/2010 10:44:01 | 28.112 |
| 10/7/2010 13:29:01 | 24.8003 | 10/8/2010 11:04:01 | 28.05  |
| 10/7/2010 13:49:01 | 24.8003 | 10/8/2010 11:24:01 | 28.05  |
| 10/7/2010 14:09:01 | 24.8003 | 10/8/2010 11:44:01 | 28.05  |
| 10/7/2010 14:29:01 | 24.8633 | 10/8/2010 12:04:01 | 27.987 |
| 10/7/2010 14:49:01 | 24.8633 | 10/8/2010 12:24:01 | 27.987 |
| 10/7/2010 15:09:01 | 24.9253 | 10/8/2010 12:44:01 | 27.987 |
| 10/7/2010 15:29:01 | 24.9253 | 10/8/2010 13:04:01 | 27.987 |
| 10/7/2010 15:49:01 | 24.9253 | 10/8/2010 13:24:01 | 27.987 |
| 10/7/2010 16:09:01 | 24.9883 | 10/8/2010 13:44:01 | 27.987 |
| 10/7/2010 16:29:01 | 24.9883 | 10/8/2010 14:04:01 | 27.925 |

|                    |         |                    |        |
|--------------------|---------|--------------------|--------|
| 10/7/2010 16:49:01 | 25.0503 | 10/8/2010 14:24:01 | 27.987 |
| 10/7/2010 17:09:01 | 25.0503 | 10/8/2010 14:44:01 | 27.925 |
| 10/7/2010 17:29:01 | 25.1133 | 10/8/2010 15:04:01 | 27.987 |
| 10/7/2010 17:49:01 | 25.1133 | 10/8/2010 15:24:01 | 27.987 |
| 10/7/2010 18:09:01 | 25.1753 | 10/8/2010 15:44:01 | 27.987 |
| 10/7/2010 18:29:01 | 25.1753 | 10/8/2010 16:04:01 | 27.987 |
| 10/7/2010 18:49:01 | 25.1753 | 10/8/2010 16:24:01 | 27.987 |
| 10/7/2010 19:09:01 | 25.2383 | 10/8/2010 16:44:01 | 27.987 |
| 10/7/2010 19:29:01 | 25.2383 | 10/8/2010 17:04:01 | 27.987 |
| 10/7/2010 19:49:01 | 25.3003 | 10/8/2010 17:24:01 | 28.05  |
| 10/7/2010 20:09:01 | 25.3003 | 10/8/2010 17:44:01 | 28.05  |
| 10/7/2010 20:29:01 | 25.3003 | 10/8/2010 18:04:01 | 28.05  |
| 10/7/2010 20:49:01 | 25.3003 | 10/8/2010 18:24:01 | 28.112 |
| 10/7/2010 21:09:01 | 25.3003 | 10/8/2010 18:44:01 | 28.112 |
| 10/7/2010 21:29:01 | 25.3003 | 10/8/2010 19:04:01 | 28.175 |
| 10/7/2010 21:49:01 | 25.3633 | 10/8/2010 19:24:01 | 28.175 |
| 10/7/2010 22:09:01 | 25.3633 | 10/8/2010 19:44:01 | 28.175 |
| 10/7/2010 22:29:01 | 25.3633 | 10/8/2010 20:04:01 | 28.237 |
| 10/7/2010 22:49:01 | 25.3633 | 10/8/2010 20:24:01 | 28.237 |
| 10/7/2010 23:09:01 | 25.3633 | 10/8/2010 20:44:01 | 28.237 |
| 10/7/2010 23:29:01 | 25.3633 | 10/8/2010 21:04:01 | 28.3   |
| 10/7/2010 23:49:01 | 25.3633 | 10/8/2010 21:24:01 | 28.3   |
| 10/8/2010 00:09:01 | 25.3633 | 10/8/2010 21:44:01 | 28.362 |
| 10/8/2010 00:29:01 | 25.3633 | 10/8/2010 22:04:01 | 28.362 |
| 10/8/2010 00:49:01 | 25.3003 | 10/8/2010 22:24:01 | 28.362 |
| 10/8/2010 01:09:01 | 25.3003 | 10/8/2010 22:44:01 | 28.362 |
| 10/8/2010 01:29:01 | 25.3003 | 10/8/2010 23:04:01 | 28.424 |
| 10/8/2010 01:49:01 | 25.3003 | 10/8/2010 23:24:01 | 28.424 |
| 10/8/2010 02:09:01 | 25.3003 | 10/8/2010 23:44:01 | 28.424 |
| 10/8/2010 02:29:01 | 25.3003 | 10/9/2010 00:04:01 | 28.424 |
| 10/8/2010 02:49:01 | 25.3003 | 10/9/2010 00:24:01 | 28.487 |
| 10/8/2010 03:09:01 | 25.3003 | 10/9/2010 00:44:01 | 28.487 |
| 10/8/2010 03:29:01 | 25.2383 | 10/9/2010 01:04:01 | 28.487 |
| 10/8/2010 03:49:01 | 25.2383 | 10/9/2010 01:24:01 | 28.487 |
| 10/8/2010 04:09:01 | 25.2383 | 10/9/2010 01:44:01 | 28.487 |
| 10/8/2010 04:29:01 | 25.2383 | 10/9/2010 02:04:01 | 28.487 |
| 10/8/2010 04:49:01 | 25.2383 | 10/9/2010 02:24:01 | 28.487 |
| 10/8/2010 05:09:01 | 25.2383 | 10/9/2010 02:44:01 | 28.487 |
| 10/8/2010 05:29:01 | 25.1753 | 10/9/2010 03:04:01 | 28.487 |
| 10/8/2010 05:49:01 | 25.1753 | 10/9/2010 03:24:01 | 28.487 |
| 10/8/2010 06:09:01 | 25.1753 | 10/9/2010 03:44:01 | 28.487 |
| 10/8/2010 06:29:01 | 25.1753 | 10/9/2010 04:04:01 | 28.487 |
| 10/8/2010 06:49:01 | 25.1753 | 10/9/2010 04:24:01 | 28.487 |
| 10/8/2010 07:09:01 | 25.1753 | 10/9/2010 04:44:01 | 28.487 |
| 10/8/2010 07:29:01 | 25.1133 | 10/9/2010 05:04:01 | 28.487 |
| 10/8/2010 07:49:01 | 25.1133 | 10/9/2010 05:24:01 | 28.487 |
| 10/8/2010 08:09:01 | 25.1133 | 10/9/2010 05:44:01 | 28.487 |
| 10/8/2010 08:29:01 | 25.1133 | 10/9/2010 06:04:01 | 28.424 |
| 10/8/2010 08:49:01 | 25.1133 | 10/9/2010 06:24:01 | 28.424 |
| 10/8/2010 09:09:01 | 25.0503 | 10/9/2010 06:44:01 | 28.424 |



|                    |         |                    |        |
|--------------------|---------|--------------------|--------|
| 10/8/2010 09:29:01 | 25.0503 | 10/9/2010 07:04:01 | 28.424 |
| 10/8/2010 09:49:01 | 25.0503 | 10/9/2010 07:24:01 | 28.424 |
| 10/8/2010 10:09:01 | 25.0503 | 10/9/2010 07:44:01 | 28.424 |
| 10/8/2010 10:29:01 | 25.0503 | 10/9/2010 08:04:01 | 28.362 |
| 10/8/2010 10:49:01 | 25.0503 | 10/9/2010 08:24:01 | 28.362 |
| 10/8/2010 11:09:01 | 25.0503 | 10/9/2010 08:44:01 | 28.362 |
| 10/8/2010 11:29:01 | 25.0503 | 10/9/2010 09:04:01 | 28.362 |
| 10/8/2010 11:49:01 | 25.0503 | 10/9/2010 09:24:01 | 28.362 |
| 10/8/2010 12:09:01 | 25.0503 | 10/9/2010 09:44:01 | 28.3   |
| 10/8/2010 12:29:01 | 25.0503 | 10/9/2010 10:04:01 | 28.3   |
| 10/8/2010 12:49:01 | 25.0503 | 10/9/2010 10:24:01 | 28.3   |
| 10/8/2010 13:09:01 | 25.0503 | 10/9/2010 10:44:01 | 28.3   |
| 10/8/2010 13:29:01 | 25.1133 | 10/9/2010 11:04:01 | 28.237 |
| 10/8/2010 13:49:01 | 25.1133 | 10/9/2010 11:24:01 | 28.237 |
| 10/8/2010 14:09:01 | 25.1133 | 10/9/2010 11:44:01 | 28.237 |
| 10/8/2010 14:29:01 | 25.1753 | 10/9/2010 12:04:01 | 28.175 |
| 10/8/2010 14:49:01 | 25.1753 | 10/9/2010 12:24:01 | 28.175 |
| 10/8/2010 15:09:01 | 25.1753 | 10/9/2010 12:44:01 | 28.175 |
| 10/8/2010 15:29:01 | 25.2383 | 10/9/2010 13:04:01 | 28.175 |
| 10/8/2010 15:49:01 | 25.2383 | 10/9/2010 13:24:01 | 28.112 |
| 10/8/2010 16:09:01 | 25.3003 | 10/9/2010 13:44:01 | 28.112 |
| 10/8/2010 16:29:01 | 25.3003 | 10/9/2010 14:04:01 | 28.112 |
| 10/8/2010 16:49:01 | 25.3003 | 10/9/2010 14:24:01 | 28.112 |
| 10/8/2010 17:09:01 | 25.3633 | 10/9/2010 14:44:01 | 28.112 |
| 10/8/2010 17:29:01 | 25.3633 | 10/9/2010 15:04:01 | 28.112 |
| 10/8/2010 17:49:01 | 25.4253 | 10/9/2010 15:24:01 | 28.112 |
| 10/8/2010 18:09:01 | 25.4253 | 10/9/2010 15:44:01 | 28.112 |
| 10/8/2010 18:29:01 | 25.4253 | 10/9/2010 16:04:01 | 28.112 |
| 10/8/2010 18:49:01 | 25.4883 | 10/9/2010 16:24:01 | 28.112 |
| 10/8/2010 19:09:01 | 25.4883 | 10/9/2010 16:44:01 | 28.112 |
| 10/8/2010 19:29:01 | 25.4883 | 10/9/2010 17:04:01 | 28.112 |
| 10/8/2010 19:49:01 | 25.5503 | 10/9/2010 17:24:01 | 28.175 |
| 10/8/2010 20:09:01 | 25.5503 | 10/9/2010 17:44:01 | 28.175 |
| 10/8/2010 20:29:01 | 25.5503 | 10/9/2010 18:04:01 | 28.175 |
| 10/8/2010 20:49:01 | 25.5503 | 10/9/2010 18:24:01 | 28.175 |
| 10/8/2010 21:09:01 | 25.5503 | 10/9/2010 18:44:01 | 28.175 |
| 10/8/2010 21:29:01 | 25.5503 | 10/9/2010 19:04:01 | 28.237 |
| 10/8/2010 21:49:01 | 25.5503 | 10/9/2010 19:24:01 | 28.237 |
| 10/8/2010 22:09:01 | 25.5503 | 10/9/2010 19:44:01 | 28.237 |
| 10/8/2010 22:29:01 | 25.5503 | 10/9/2010 20:04:01 | 28.237 |
| 10/8/2010 22:49:01 | 25.5503 | 10/9/2010 20:24:01 | 28.237 |
| 10/8/2010 23:09:01 | 25.5503 | 10/9/2010 20:44:01 | 28.3   |
| 10/8/2010 23:29:01 | 25.5503 | 10/9/2010 21:04:01 | 28.3   |
| 10/8/2010 23:49:01 | 25.5503 | 10/9/2010 21:24:01 | 28.3   |
| 10/9/2010 00:09:01 | 25.5503 | 10/9/2010 21:44:01 | 28.3   |
| 10/9/2010 00:29:01 | 25.5503 | 10/9/2010 22:04:01 | 28.3   |
| 10/9/2010 00:49:01 | 25.5503 | 10/9/2010 22:24:01 | 28.362 |
| 10/9/2010 01:09:01 | 25.5503 | 10/9/2010 22:44:01 | 28.362 |
| 10/9/2010 01:29:01 | 25.5503 | 10/9/2010 23:04:01 | 28.362 |
| 10/9/2010 01:49:01 | 25.5503 | 10/9/2010 23:24:01 | 28.362 |

|                    |         |                     |        |
|--------------------|---------|---------------------|--------|
| 10/9/2010 02:09:01 | 25.4883 | 10/9/2010 23:44:01  | 28.362 |
| 10/9/2010 02:29:01 | 25.4883 | 10/10/2010 00:04:01 | 28.362 |
| 10/9/2010 02:49:01 | 25.4883 | 10/10/2010 00:24:01 | 28.362 |
| 10/9/2010 03:09:01 | 25.4883 | 10/10/2010 00:44:01 | 28.362 |
| 10/9/2010 03:29:01 | 25.4883 | 10/10/2010 01:04:01 | 28.362 |
| 10/9/2010 03:49:01 | 25.4883 | 10/10/2010 01:24:01 | 28.362 |
| 10/9/2010 04:09:01 | 25.4883 | 10/10/2010 01:44:01 | 28.362 |
| 10/9/2010 04:29:01 | 25.4253 | 10/10/2010 02:04:01 | 28.362 |
| 10/9/2010 04:49:01 | 25.4253 | 10/10/2010 02:24:01 | 28.362 |
| 10/9/2010 05:09:01 | 25.4253 | 10/10/2010 02:44:01 | 28.362 |
| 10/9/2010 05:29:01 | 25.4253 | 10/10/2010 03:04:01 | 28.362 |
| 10/9/2010 05:49:01 | 25.4253 | 10/10/2010 03:24:01 | 28.362 |
| 10/9/2010 06:09:01 | 25.3633 | 10/10/2010 03:44:01 | 28.362 |
| 10/9/2010 06:29:01 | 25.3633 | 10/10/2010 04:04:01 | 28.362 |
| 10/9/2010 06:49:01 | 25.3633 | 10/10/2010 04:24:01 | 28.362 |
| 10/9/2010 07:09:01 | 25.3633 | 10/10/2010 04:44:01 | 28.3   |
| 10/9/2010 07:29:01 | 25.3003 | 10/10/2010 05:04:01 | 28.3   |
| 10/9/2010 07:49:01 | 25.3003 | 10/10/2010 05:24:01 | 28.3   |
| 10/9/2010 08:09:01 | 25.3003 | 10/10/2010 05:44:01 | 28.3   |
| 10/9/2010 08:29:01 | 25.3003 | 10/10/2010 06:04:01 | 28.3   |
| 10/9/2010 08:49:01 | 25.3003 | 10/10/2010 06:24:01 | 28.3   |
| 10/9/2010 09:09:01 | 25.2383 | 10/10/2010 06:44:01 | 28.237 |
| 10/9/2010 09:29:01 | 25.2383 | 10/10/2010 07:04:01 | 28.237 |
| 10/9/2010 09:49:01 | 25.2383 | 10/10/2010 07:24:01 | 28.237 |
| 10/9/2010 10:09:01 | 25.2383 | 10/10/2010 07:44:01 | 28.175 |
| 10/9/2010 10:29:01 | 25.2383 | 10/10/2010 08:04:01 | 28.175 |
| 10/9/2010 10:49:01 | 25.2383 | 10/10/2010 08:24:01 | 28.175 |
| 10/9/2010 11:09:01 | 25.1753 | 10/10/2010 08:44:01 | 28.175 |
| 10/9/2010 11:29:01 | 25.2383 | 10/10/2010 09:04:01 | 28.112 |
| 10/9/2010 11:49:01 | 25.2383 | 10/10/2010 09:24:01 | 28.112 |
| 10/9/2010 12:09:01 | 25.1753 | 10/10/2010 09:44:01 | 28.112 |
| 10/9/2010 12:29:01 | 25.2383 | 10/10/2010 10:04:01 | 28.05  |
| 10/9/2010 12:49:01 | 25.2383 | 10/10/2010 10:24:01 | 28.05  |
| 10/9/2010 13:09:01 | 25.2383 | 10/10/2010 10:44:01 | 28.05  |
| 10/9/2010 13:29:01 | 25.2383 | 10/10/2010 11:04:01 | 27.987 |
| 10/9/2010 13:49:01 | 25.3003 | 10/10/2010 11:24:01 | 27.987 |
| 10/9/2010 14:09:01 | 25.3003 | 10/10/2010 11:44:01 | 27.987 |
| 10/9/2010 14:29:01 | 25.3003 | 10/10/2010 12:04:01 | 27.925 |
| 10/9/2010 14:49:01 | 25.3003 | 10/10/2010 12:24:01 | 27.925 |
| 10/9/2010 15:09:01 | 25.3003 | 10/10/2010 12:44:01 | 27.925 |
| 10/9/2010 15:29:01 | 25.3633 | 10/10/2010 13:04:01 | 27.925 |
| 10/9/2010 15:49:01 | 25.3633 | 10/10/2010 13:24:01 | 27.863 |
| 10/9/2010 16:09:01 | 25.3633 | 10/10/2010 13:44:01 | 27.863 |
| 10/9/2010 16:29:01 | 25.4253 | 10/10/2010 14:04:01 | 27.863 |
| 10/9/2010 16:49:01 | 25.4253 | 10/10/2010 14:24:01 | 27.863 |
| 10/9/2010 17:09:01 | 25.4253 | 10/10/2010 14:44:01 | 27.863 |
| 10/9/2010 17:29:01 | 25.4883 | 10/10/2010 15:04:01 | 27.863 |
| 10/9/2010 17:49:01 | 25.4883 | 10/10/2010 15:24:01 | 27.863 |
| 10/9/2010 18:09:01 | 25.4883 | 10/10/2010 15:44:01 | 27.863 |
| 10/9/2010 18:29:01 | 25.5503 | 10/10/2010 16:04:01 | 27.863 |

|                     |         |                     |        |
|---------------------|---------|---------------------|--------|
| 10/9/2010 18:49:01  | 25.5503 | 10/10/2010 16:24:01 | 27.863 |
| 10/9/2010 19:09:01  | 25.5503 | 10/10/2010 16:44:01 | 27.925 |
| 10/9/2010 19:29:01  | 25.5503 | 10/10/2010 17:04:01 | 27.925 |
| 10/9/2010 19:49:01  | 25.5503 | 10/10/2010 17:24:01 | 27.925 |
| 10/9/2010 20:09:01  | 25.6133 | 10/10/2010 17:44:01 | 27.987 |
| 10/9/2010 20:29:01  | 25.6133 | 10/10/2010 18:04:01 | 27.987 |
| 10/9/2010 20:49:01  | 25.6133 | 10/10/2010 18:24:01 | 27.987 |
| 10/9/2010 21:09:01  | 25.6133 | 10/10/2010 18:44:01 | 28.05  |
| 10/9/2010 21:29:01  | 25.6133 | 10/10/2010 19:04:01 | 28.05  |
| 10/9/2010 21:49:01  | 25.6133 | 10/10/2010 19:24:01 | 28.05  |
| 10/9/2010 22:09:01  | 25.6133 | 10/10/2010 19:44:01 | 28.112 |
| 10/9/2010 22:29:01  | 25.6133 | 10/10/2010 20:04:01 | 28.112 |
| 10/9/2010 22:49:01  | 25.6133 | 10/10/2010 20:24:01 | 28.112 |
| 10/9/2010 23:09:01  | 25.6133 | 10/10/2010 20:44:01 | 28.175 |
| 10/9/2010 23:29:01  | 25.6133 | 10/10/2010 21:04:01 | 28.175 |
| 10/9/2010 23:49:01  | 25.6133 | 10/10/2010 21:24:01 | 28.237 |
| 10/10/2010 00:09:01 | 25.6133 | 10/10/2010 21:44:01 | 28.237 |
| 10/10/2010 00:29:01 | 25.6133 | 10/10/2010 22:04:01 | 28.237 |
| 10/10/2010 00:49:01 | 25.6133 | 10/10/2010 22:24:01 | 28.3   |
| 10/10/2010 01:09:01 | 25.6133 | 10/10/2010 22:44:01 | 28.3   |
| 10/10/2010 01:29:01 | 25.5503 | 10/10/2010 23:04:01 | 28.3   |
| 10/10/2010 01:49:01 | 25.5503 | 10/10/2010 23:24:01 | 28.362 |
| 10/10/2010 02:09:01 | 25.5503 | 10/10/2010 23:44:01 | 28.362 |
| 10/10/2010 02:29:01 | 25.5503 | 10/11/2010 00:04:01 | 28.362 |
| 10/10/2010 02:49:01 | 25.5503 | 10/11/2010 00:24:01 | 28.362 |
| 10/10/2010 03:09:01 | 25.4883 | 10/11/2010 00:44:01 | 28.362 |
| 10/10/2010 03:29:01 | 25.4883 | 10/11/2010 01:04:01 | 28.424 |
| 10/10/2010 03:49:01 | 25.4883 | 10/11/2010 01:24:01 | 28.424 |
| 10/10/2010 04:09:01 | 25.4883 | 10/11/2010 01:44:01 | 28.424 |
| 10/10/2010 04:29:01 | 25.4253 | 10/11/2010 02:04:01 | 28.424 |
| 10/10/2010 04:49:01 | 25.4253 | 10/11/2010 02:24:01 | 28.424 |
| 10/10/2010 05:09:01 | 25.4253 | 10/11/2010 02:44:01 | 28.424 |
| 10/10/2010 05:29:01 | 25.4253 | 10/11/2010 03:04:01 | 28.424 |
| 10/10/2010 05:49:01 | 25.3633 | 10/11/2010 03:24:01 | 28.424 |
| 10/10/2010 06:09:01 | 25.3633 | 10/11/2010 03:44:01 | 28.424 |
| 10/10/2010 06:29:01 | 25.3633 | 10/11/2010 04:04:01 | 28.424 |
| 10/10/2010 06:49:01 | 25.3633 | 10/11/2010 04:24:01 | 28.424 |
| 10/10/2010 07:09:01 | 25.3003 | 10/11/2010 04:44:01 | 28.424 |
| 10/10/2010 07:29:01 | 25.3003 | 10/11/2010 05:04:01 | 28.362 |
| 10/10/2010 07:49:01 | 25.3003 | 10/11/2010 05:24:01 | 28.362 |
| 10/10/2010 08:09:01 | 25.2383 | 10/11/2010 05:44:01 | 28.362 |
| 10/10/2010 08:29:01 | 25.2383 | 10/11/2010 06:04:01 | 28.362 |
| 10/10/2010 08:49:01 | 25.2383 | 10/11/2010 06:24:01 | 28.362 |
| 10/10/2010 09:09:01 | 25.1753 | 10/11/2010 06:44:01 | 28.362 |
| 10/10/2010 09:29:01 | 25.1753 | 10/11/2010 07:04:01 | 28.3   |
| 10/10/2010 09:49:01 | 25.1753 | 10/11/2010 07:24:01 | 28.3   |
| 10/10/2010 10:09:01 | 25.1753 | 10/11/2010 07:44:01 | 28.3   |
| 10/10/2010 10:29:01 | 25.1753 | 10/11/2010 08:04:01 | 28.3   |
| 10/10/2010 10:49:01 | 25.1753 | 10/11/2010 08:24:01 | 28.237 |
| 10/10/2010 11:09:01 | 25.1133 | 10/11/2010 08:44:01 | 28.237 |

|                     |         |                     |        |
|---------------------|---------|---------------------|--------|
| 10/10/2010 11:29:01 | 25.1133 | 10/11/2010 09:04:01 | 28.237 |
| 10/10/2010 11:49:01 | 25.1133 | 10/11/2010 09:24:01 | 28.237 |
| 10/10/2010 12:09:01 | 25.1133 | 10/11/2010 09:44:01 | 28.175 |
| 10/10/2010 12:29:01 | 25.1133 | 10/11/2010 10:04:01 | 28.175 |
| 10/10/2010 12:49:01 | 25.1133 | 10/11/2010 10:24:01 | 28.175 |
| 10/10/2010 13:09:01 | 25.1753 | 10/11/2010 10:44:01 | 28.112 |
| 10/10/2010 13:29:01 | 25.1753 | 10/11/2010 11:04:01 | 28.112 |
| 10/10/2010 13:49:01 | 25.1753 | 10/11/2010 11:24:01 | 28.112 |
| 10/10/2010 14:09:01 | 25.1753 | 10/11/2010 11:44:01 | 28.05  |
| 10/10/2010 14:29:01 | 25.2383 | 10/11/2010 12:04:01 | 28.05  |
| 10/10/2010 14:49:01 | 25.2383 | 10/11/2010 12:24:01 | 28.05  |
| 10/10/2010 15:09:01 | 25.3003 | 10/11/2010 12:44:01 | 28.05  |
| 10/10/2010 15:29:01 | 25.3003 | 10/11/2010 13:04:01 | 27.987 |
| 10/10/2010 15:49:01 | 25.3003 | 10/11/2010 13:24:01 | 27.987 |
| 10/10/2010 16:09:01 | 25.3633 | 10/11/2010 13:44:01 | 27.987 |
| 10/10/2010 16:29:01 | 25.3633 | 10/11/2010 14:04:01 | 27.987 |
| 10/10/2010 16:49:01 | 25.4253 | 10/11/2010 14:24:01 | 27.987 |
| 10/10/2010 17:09:01 | 25.4253 | 10/11/2010 14:44:01 | 27.987 |
| 10/10/2010 17:29:01 | 25.4883 | 10/11/2010 15:04:01 | 27.987 |
| 10/10/2010 17:49:01 | 25.4883 | 10/11/2010 15:24:01 | 27.987 |
| 10/10/2010 18:09:01 | 25.4883 | 10/11/2010 15:44:01 | 27.987 |
| 10/10/2010 18:29:01 | 25.5503 | 10/11/2010 16:04:01 | 27.987 |
| 10/10/2010 18:49:01 | 25.5503 | 10/11/2010 16:24:01 | 27.987 |
| 10/10/2010 19:09:01 | 25.6133 | 10/11/2010 16:44:01 | 28.05  |
| 10/10/2010 19:29:01 | 25.6133 | 10/11/2010 17:04:01 | 28.05  |
| 10/10/2010 19:49:01 | 25.6133 | 10/11/2010 17:24:01 | 28.05  |
| 10/10/2010 20:09:01 | 25.6133 | 10/11/2010 17:44:01 | 28.05  |
| 10/10/2010 20:29:01 | 25.6753 | 10/11/2010 18:04:01 | 28.112 |
| 10/10/2010 20:49:01 | 25.6753 | 10/11/2010 18:24:01 | 28.112 |
| 10/10/2010 21:09:01 | 25.6753 | 10/11/2010 18:44:01 | 28.175 |
| 10/10/2010 21:29:01 | 25.6753 | 10/11/2010 19:04:01 | 28.175 |
| 10/10/2010 21:49:01 | 25.6753 | 10/11/2010 19:24:01 | 28.175 |
| 10/10/2010 22:09:01 | 25.6753 | 10/11/2010 19:44:01 | 28.237 |
| 10/10/2010 22:29:01 | 25.6753 | 10/11/2010 20:04:01 | 28.237 |
| 10/10/2010 22:49:01 | 25.6753 | 10/11/2010 20:24:01 | 28.3   |
| 10/10/2010 23:09:01 | 25.6753 | 10/11/2010 20:44:01 | 28.3   |
| 10/10/2010 23:29:01 | 25.6753 | 10/11/2010 21:04:01 | 28.362 |
| 10/10/2010 23:49:01 | 25.6753 | 10/11/2010 21:24:01 | 28.362 |
| 10/11/2010 00:09:01 | 25.6753 | 10/11/2010 21:44:01 | 28.362 |
| 10/11/2010 00:29:01 | 25.6753 | 10/11/2010 22:04:01 | 28.424 |
| 10/11/2010 00:49:01 | 25.6753 | 10/11/2010 22:24:01 | 28.424 |
| 10/11/2010 01:09:01 | 25.6753 | 10/11/2010 22:44:01 | 28.424 |
| 10/11/2010 01:29:01 | 25.6133 | 10/11/2010 23:04:01 | 28.487 |
| 10/11/2010 01:49:01 | 25.6133 | 10/11/2010 23:24:01 | 28.487 |
| 10/11/2010 02:09:01 | 25.6133 | 10/11/2010 23:44:01 | 28.487 |
| 10/11/2010 02:29:01 | 25.6133 | 10/12/2010 00:04:01 | 28.487 |
| 10/11/2010 02:49:01 | 25.6133 | 10/12/2010 00:24:01 | 28.549 |
| 10/11/2010 03:09:01 | 25.5503 | 10/12/2010 00:44:01 | 28.549 |
| 10/11/2010 03:29:01 | 25.5503 | 10/12/2010 01:04:01 | 28.549 |
| 10/11/2010 03:49:01 | 25.5503 | 10/12/2010 01:24:01 | 28.549 |

|                     |         |                     |        |
|---------------------|---------|---------------------|--------|
| 10/11/2010 04:09:01 | 25.5503 | 10/12/2010 01:44:01 | 28.549 |
| 10/11/2010 04:29:01 | 25.4883 | 10/12/2010 02:04:01 | 28.549 |
| 10/11/2010 04:49:01 | 25.4883 | 10/12/2010 02:24:01 | 28.549 |
| 10/11/2010 05:09:01 | 25.4883 | 10/12/2010 02:44:01 | 28.549 |
| 10/11/2010 05:29:01 | 25.4883 | 10/12/2010 03:04:01 | 28.549 |
| 10/11/2010 05:49:01 | 25.4253 | 10/12/2010 03:24:01 | 28.549 |
| 10/11/2010 06:09:01 | 25.4253 | 10/12/2010 03:44:01 | 28.549 |
| 10/11/2010 06:29:01 | 25.4253 | 10/12/2010 04:04:01 | 28.549 |
| 10/11/2010 06:49:01 | 25.4253 | 10/12/2010 04:24:01 | 28.549 |
| 10/11/2010 07:09:01 | 25.3633 | 10/12/2010 04:44:01 | 28.549 |
| 10/11/2010 07:29:01 | 25.3633 | 10/12/2010 05:04:01 | 28.549 |
| 10/11/2010 07:49:01 | 25.3633 | 10/12/2010 05:24:01 | 28.549 |
| 10/11/2010 08:09:01 | 25.3003 | 10/12/2010 05:44:01 | 28.549 |
| 10/11/2010 08:29:01 | 25.3003 | 10/12/2010 06:04:01 | 28.487 |
| 10/11/2010 08:49:01 | 25.3003 | 10/12/2010 06:24:01 | 28.487 |
| 10/11/2010 09:09:01 | 25.3003 | 10/12/2010 06:44:01 | 28.487 |
| 10/11/2010 09:29:01 | 25.2383 | 10/12/2010 07:04:01 | 28.487 |
| 10/11/2010 09:49:01 | 25.2383 | 10/12/2010 07:24:01 | 28.487 |
| 10/11/2010 10:09:01 | 25.2383 | 10/12/2010 07:44:01 | 28.487 |
| 10/11/2010 10:29:01 | 25.2383 | 10/12/2010 08:04:01 | 28.424 |
| 10/11/2010 10:49:01 | 25.1753 | 10/12/2010 08:24:01 | 28.424 |
| 10/11/2010 11:09:01 | 25.1753 | 10/12/2010 08:44:01 | 28.424 |
| 10/11/2010 11:29:01 | 25.1753 | 10/12/2010 09:04:01 | 28.424 |
| 10/11/2010 11:49:01 | 25.1753 | 10/12/2010 09:24:01 | 28.362 |
| 10/11/2010 12:09:01 | 25.1753 | 10/12/2010 09:44:01 | 28.362 |
| 10/11/2010 12:29:01 | 25.1753 | 10/12/2010 10:04:01 | 28.362 |
| 10/11/2010 12:49:01 | 25.1753 | 10/12/2010 10:24:01 | 28.3   |
| 10/11/2010 13:09:01 | 25.2383 | 10/12/2010 10:44:01 | 28.3   |
| 10/11/2010 13:29:01 | 25.2383 | 10/12/2010 11:04:01 | 28.3   |
| 10/11/2010 13:49:01 | 25.2383 | 10/12/2010 11:24:01 | 28.237 |
| 10/11/2010 14:09:01 | 25.2383 | 10/12/2010 11:44:01 | 28.237 |
| 10/11/2010 14:29:01 | 25.3003 | 10/12/2010 12:04:01 | 28.237 |
| 10/11/2010 14:49:01 | 25.3003 | 10/12/2010 12:24:01 | 28.175 |
| 10/11/2010 15:09:01 | 25.3633 | 10/12/2010 12:44:01 | 28.175 |
| 10/11/2010 15:29:01 | 25.3633 | 10/12/2010 13:04:01 | 28.175 |
| 10/11/2010 15:49:01 | 25.4253 | 10/12/2010 13:24:01 | 28.175 |
| 10/11/2010 16:09:01 | 25.4253 | 10/12/2010 13:44:01 | 28.112 |
| 10/11/2010 16:29:01 | 25.4883 | 10/12/2010 14:04:01 | 28.112 |
| 10/11/2010 16:49:01 | 25.4883 | 10/12/2010 14:24:01 | 28.112 |
| 10/11/2010 17:09:01 | 25.5503 | 10/12/2010 14:44:01 | 28.112 |
| 10/11/2010 17:29:01 | 25.5503 | 10/12/2010 15:04:01 | 28.112 |
| 10/11/2010 17:49:01 | 25.6133 | 10/12/2010 15:24:01 | 28.112 |
| 10/11/2010 18:09:01 | 25.6133 | 10/12/2010 15:44:01 | 28.112 |
| 10/11/2010 18:29:01 | 25.6133 | 10/12/2010 16:04:01 | 28.175 |
| 10/11/2010 18:49:01 | 25.6753 | 10/12/2010 16:24:01 | 28.175 |
| 10/11/2010 19:09:01 | 25.6753 | 10/12/2010 16:44:01 | 28.175 |
| 10/11/2010 19:29:01 | 25.6753 | 10/12/2010 17:04:01 | 28.175 |
| 10/11/2010 19:49:01 | 25.7383 | 10/12/2010 17:24:01 | 28.237 |
| 10/11/2010 20:09:01 | 25.7383 | 10/12/2010 17:44:01 | 28.237 |
| 10/11/2010 20:29:01 | 25.7383 | 10/12/2010 18:04:01 | 28.237 |

|                     |         |                     |        |
|---------------------|---------|---------------------|--------|
| 10/11/2010 20:49:01 | 25.7383 | 10/12/2010 18:24:01 | 28.3   |
| 10/11/2010 21:09:01 | 25.8003 | 10/12/2010 18:44:01 | 28.3   |
| 10/11/2010 21:29:01 | 25.8003 | 10/12/2010 19:04:01 | 28.3   |
| 10/11/2010 21:49:01 | 25.8003 | 10/12/2010 19:24:01 | 28.362 |
| 10/11/2010 22:09:01 | 25.8003 | 10/12/2010 19:44:01 | 28.362 |
| 10/11/2010 22:29:01 | 25.8003 | 10/12/2010 20:04:01 | 28.424 |
| 10/11/2010 22:49:01 | 25.8003 | 10/12/2010 20:24:01 | 28.424 |
| 10/11/2010 23:09:01 | 25.8003 | 10/12/2010 20:44:01 | 28.487 |
| 10/11/2010 23:29:01 | 25.8003 | 10/12/2010 21:04:01 | 28.487 |
| 10/11/2010 23:49:01 | 25.8003 | 10/12/2010 21:24:01 | 28.487 |
| 10/12/2010 00:09:01 | 25.8003 | 10/12/2010 21:44:01 | 28.549 |
| 10/12/2010 00:29:01 | 25.7383 | 10/12/2010 22:04:01 | 28.549 |
| 10/12/2010 00:49:01 | 25.7383 | 10/12/2010 22:24:01 | 28.612 |
| 10/12/2010 01:09:01 | 25.7383 | 10/12/2010 22:44:01 | 28.612 |
| 10/12/2010 01:29:01 | 25.7383 | 10/12/2010 23:04:01 | 28.612 |
| 10/12/2010 01:49:01 | 25.7383 | 10/12/2010 23:24:01 | 28.674 |
| 10/12/2010 02:09:01 | 25.7383 | 10/12/2010 23:44:01 | 28.674 |
| 10/12/2010 02:29:01 | 25.7383 | 10/13/2010 00:04:01 | 28.674 |
| 10/12/2010 02:49:01 | 25.6753 | 10/13/2010 00:24:01 | 28.674 |
| 10/12/2010 03:09:01 | 25.6753 | 10/13/2010 00:44:01 | 28.737 |
| 10/12/2010 03:29:01 | 25.6753 | 10/13/2010 01:04:01 | 28.737 |
| 10/12/2010 03:49:01 | 25.6753 | 10/13/2010 01:24:01 | 28.737 |
| 10/12/2010 04:09:01 | 25.6753 | 10/13/2010 01:44:01 | 28.737 |
| 10/12/2010 04:29:01 | 25.6133 | 10/13/2010 02:04:01 | 28.737 |
| 10/12/2010 04:49:01 | 25.6133 | 10/13/2010 02:24:01 | 28.737 |
| 10/12/2010 05:09:01 | 25.6133 | 10/13/2010 02:44:01 | 28.737 |
| 10/12/2010 05:29:01 | 25.5503 | 10/13/2010 03:04:01 | 28.737 |
| 10/12/2010 05:49:01 | 25.5503 | 10/13/2010 03:24:01 | 28.737 |
| 10/12/2010 06:09:01 | 25.5503 | 10/13/2010 03:44:01 | 28.799 |
| 10/12/2010 06:29:01 | 25.5503 | 10/13/2010 04:04:01 | 28.799 |
| 10/12/2010 06:49:01 | 25.4883 | 10/13/2010 04:24:01 | 28.737 |
| 10/12/2010 07:09:01 | 25.4883 | 10/13/2010 04:44:01 | 28.737 |
| 10/12/2010 07:29:01 | 25.4883 | 10/13/2010 05:04:01 | 28.737 |
| 10/12/2010 07:49:01 | 25.4253 | 10/13/2010 05:24:01 | 28.737 |
| 10/12/2010 08:09:01 | 25.4253 | 10/13/2010 05:44:01 | 28.737 |
| 10/12/2010 08:29:01 | 25.4253 | 10/13/2010 06:04:01 | 28.737 |
| 10/12/2010 08:49:01 | 25.4253 | 10/13/2010 06:24:01 | 28.737 |
| 10/12/2010 09:09:01 | 25.3633 | 10/13/2010 06:44:01 | 28.737 |
| 10/12/2010 09:29:01 | 25.3633 | 10/13/2010 07:04:01 | 28.674 |
| 10/12/2010 09:49:01 | 25.3633 | 10/13/2010 07:24:01 | 28.674 |
| 10/12/2010 10:09:01 | 25.3003 | 10/13/2010 07:44:01 | 28.674 |
| 10/12/2010 10:29:01 | 25.3003 | 10/13/2010 08:04:01 | 28.674 |
| 10/12/2010 10:49:01 | 25.3003 | 10/13/2010 08:24:01 | 28.674 |
| 10/12/2010 11:09:01 | 25.3003 | 10/13/2010 08:44:01 | 28.612 |
| 10/12/2010 11:29:01 | 25.3003 | 10/13/2010 09:04:01 | 28.612 |
| 10/12/2010 11:49:01 | 25.3003 | 10/13/2010 09:24:01 | 28.612 |
| 10/12/2010 12:09:01 | 25.3003 | 10/13/2010 09:44:01 | 28.549 |
| 10/12/2010 12:29:01 | 25.3003 | 10/13/2010 10:04:01 | 28.549 |
| 10/12/2010 12:49:01 | 25.3003 | 10/13/2010 10:24:01 | 28.549 |
| 10/12/2010 13:09:01 | 25.3003 | 10/13/2010 10:44:01 | 28.549 |

|                     |         |                     |        |
|---------------------|---------|---------------------|--------|
| 10/12/2010 13:29:01 | 25.3003 | 10/13/2010 11:04:01 | 28.487 |
| 10/12/2010 13:49:01 | 25.3633 | 10/13/2010 11:24:01 | 28.487 |
| 10/12/2010 14:09:01 | 25.3633 | 10/13/2010 11:44:01 | 28.487 |
| 10/12/2010 14:29:01 | 25.3633 | 10/13/2010 12:04:01 | 28.424 |
| 10/12/2010 14:49:01 | 25.3633 | 10/13/2010 12:24:01 | 28.424 |
| 10/12/2010 15:09:01 | 25.4253 | 10/13/2010 12:44:01 | 28.424 |
| 10/12/2010 15:29:01 | 25.4253 | 10/13/2010 13:04:01 | 28.424 |
| 10/12/2010 15:49:01 | 25.4883 | 10/13/2010 13:24:01 | 28.362 |
| 10/12/2010 16:09:01 | 25.4883 | 10/13/2010 13:44:01 | 28.362 |
| 10/12/2010 16:29:01 | 25.5503 | 10/13/2010 14:04:01 | 28.362 |
| 10/12/2010 16:49:01 | 25.5503 | 10/13/2010 14:24:01 | 28.362 |
| 10/12/2010 17:09:01 | 25.5503 | 10/13/2010 14:44:01 | 28.362 |
| 10/12/2010 17:29:01 | 25.6133 | 10/13/2010 15:04:01 | 28.362 |
| 10/12/2010 17:49:01 | 25.6133 | 10/13/2010 15:24:01 | 28.362 |
| 10/12/2010 18:09:01 | 25.6753 | 10/13/2010 15:44:01 | 28.362 |
| 10/12/2010 18:29:01 | 25.6753 | 10/13/2010 16:04:01 | 28.362 |
| 10/12/2010 18:49:01 | 25.6753 | 10/13/2010 16:24:01 | 28.362 |
| 10/12/2010 19:09:01 | 25.7383 | 10/13/2010 16:44:01 | 28.362 |
| 10/12/2010 19:29:01 | 25.7383 | 10/13/2010 17:04:01 | 28.424 |
| 10/12/2010 19:49:01 | 25.7383 | 10/13/2010 17:24:01 | 28.424 |
| 10/12/2010 20:09:01 | 25.8003 | 10/13/2010 17:44:01 | 28.424 |
| 10/12/2010 20:29:01 | 25.8003 | 10/13/2010 18:04:01 | 28.424 |
| 10/12/2010 20:49:01 | 25.8003 | 10/13/2010 18:24:01 | 28.487 |
| 10/12/2010 21:09:01 | 25.8003 | 10/13/2010 18:44:01 | 28.487 |
| 10/12/2010 21:29:01 | 25.8003 | 10/13/2010 19:04:01 | 28.549 |
| 10/12/2010 21:49:01 | 25.8003 | 10/13/2010 19:24:01 | 28.549 |
| 10/12/2010 22:09:01 | 25.8633 | 10/13/2010 19:44:01 | 28.549 |
| 10/12/2010 22:29:01 | 25.8633 | 10/13/2010 20:04:01 | 28.612 |
| 10/12/2010 22:49:01 | 25.8633 | 10/13/2010 20:24:01 | 28.612 |
| 10/12/2010 23:09:01 | 25.8633 | 10/13/2010 20:44:01 | 28.612 |
| 10/12/2010 23:29:01 | 25.8633 | 10/13/2010 21:04:01 | 28.674 |
| 10/12/2010 23:49:01 | 25.8633 | 10/13/2010 21:24:01 | 28.674 |
| 10/13/2010 00:09:01 | 25.8633 | 10/13/2010 21:44:01 | 28.737 |
| 10/13/2010 00:29:01 | 25.8633 | 10/13/2010 22:04:01 | 28.737 |
| 10/13/2010 00:49:01 | 25.8633 | 10/13/2010 22:24:01 | 28.737 |
| 10/13/2010 01:09:01 | 25.8633 | 10/13/2010 22:44:01 | 28.737 |
| 10/13/2010 01:29:01 | 25.8633 | 10/13/2010 23:04:01 | 28.799 |
| 10/13/2010 01:49:01 | 25.8003 | 10/13/2010 23:24:01 | 28.799 |
| 10/13/2010 02:09:01 | 25.8003 | 10/13/2010 23:44:01 | 28.799 |
| 10/13/2010 02:29:01 | 25.8003 | 10/14/2010 00:04:01 | 28.799 |
| 10/13/2010 02:49:01 | 25.8003 | 10/14/2010 00:24:01 | 28.799 |
| 10/13/2010 03:09:01 | 25.8003 | 10/14/2010 00:44:01 | 28.861 |
| 10/13/2010 03:29:01 | 25.8003 | 10/14/2010 01:04:01 | 28.861 |
| 10/13/2010 03:49:01 | 25.8003 | 10/14/2010 01:24:01 | 28.861 |
| 10/13/2010 04:09:01 | 25.7383 | 10/14/2010 01:44:01 | 28.861 |
| 10/13/2010 04:29:01 | 25.7383 | 10/14/2010 02:04:01 | 28.861 |
| 10/13/2010 04:49:01 | 25.7383 | 10/14/2010 02:24:01 | 28.861 |
| 10/13/2010 05:09:01 | 25.7383 | 10/14/2010 02:44:01 | 28.861 |
| 10/13/2010 05:29:01 | 25.6753 | 10/14/2010 03:04:01 | 28.861 |
| 10/13/2010 05:49:01 | 25.6753 | 10/14/2010 03:24:01 | 28.861 |

|                     |         |                     |        |
|---------------------|---------|---------------------|--------|
| 10/13/2010 06:09:01 | 25.6753 | 10/14/2010 03:44:01 | 28.861 |
| 10/13/2010 06:29:01 | 25.6753 | 10/14/2010 04:04:01 | 28.861 |
| 10/13/2010 06:49:01 | 25.6133 | 10/14/2010 04:24:01 | 28.861 |
| 10/13/2010 07:09:01 | 25.6133 | 10/14/2010 04:44:01 | 28.799 |
| 10/13/2010 07:29:01 | 25.6133 | 10/14/2010 05:04:01 | 28.799 |
| 10/13/2010 07:49:01 | 25.5503 | 10/14/2010 05:24:01 | 28.799 |
| 10/13/2010 08:09:01 | 25.5503 | 10/14/2010 05:44:01 | 28.799 |
| 10/13/2010 08:29:01 | 25.5503 | 10/14/2010 06:04:01 | 28.799 |
| 10/13/2010 08:49:01 | 25.5503 | 10/14/2010 06:24:01 | 28.799 |
| 10/13/2010 09:09:01 | 25.4883 | 10/14/2010 06:44:01 | 28.737 |
| 10/13/2010 09:29:01 | 25.4883 | 10/14/2010 07:04:01 | 28.737 |
| 10/13/2010 09:49:01 | 25.4883 | 10/14/2010 07:24:01 | 28.737 |
| 10/13/2010 10:09:01 | 25.4883 | 10/14/2010 07:44:01 | 28.737 |
| 10/13/2010 10:29:01 | 25.4253 | 10/14/2010 08:04:01 | 28.674 |
| 10/13/2010 10:49:01 | 25.4253 | 10/14/2010 08:24:01 | 28.674 |
| 10/13/2010 11:09:01 | 25.4253 | 10/14/2010 08:44:01 | 28.674 |
| 10/13/2010 11:29:01 | 25.4253 | 10/14/2010 09:04:01 | 28.612 |
| 10/13/2010 11:49:01 | 25.4253 | 10/14/2010 09:24:01 | 28.612 |
| 10/13/2010 12:09:01 | 25.4253 | 10/14/2010 09:44:01 | 28.612 |
| 10/13/2010 12:29:01 | 25.4253 | 10/14/2010 10:04:01 | 28.549 |
| 10/13/2010 12:49:01 | 25.4253 | 10/14/2010 10:24:01 | 28.549 |
| 10/13/2010 13:09:01 | 25.4253 | 10/14/2010 10:44:01 | 28.549 |
| 10/13/2010 13:29:01 | 25.4253 | 10/14/2010 11:04:01 | 28.487 |
| 10/13/2010 13:49:01 | 25.4883 | 10/14/2010 11:24:01 | 28.487 |
| 10/13/2010 14:09:01 | 25.4883 | 10/14/2010 11:44:01 | 28.424 |
| 10/13/2010 14:29:01 | 25.4883 | 10/14/2010 12:04:01 | 28.424 |
| 10/13/2010 14:49:01 | 25.4883 | 10/14/2010 12:24:01 | 28.424 |
| 10/13/2010 15:09:01 | 25.5503 | 10/14/2010 12:44:01 | 28.362 |
| 10/13/2010 15:29:01 | 25.5503 | 10/14/2010 13:04:01 | 28.362 |
| 10/13/2010 15:49:01 | 25.5503 | 10/14/2010 13:24:01 | 28.362 |
| 10/13/2010 16:09:01 | 25.6133 | 10/14/2010 13:44:01 | 28.362 |
| 10/13/2010 16:29:01 | 25.6133 | 10/14/2010 14:04:01 | 28.362 |
| 10/13/2010 16:49:01 | 25.6753 | 10/14/2010 14:24:01 | 28.3   |
| 10/13/2010 17:09:01 | 25.6753 | 10/14/2010 14:44:01 | 28.3   |
| 10/13/2010 17:29:01 | 25.6753 | 10/14/2010 15:04:01 | 28.3   |
| 10/13/2010 17:49:01 | 25.7383 | 10/14/2010 15:24:01 | 28.3   |
| 10/13/2010 18:09:01 | 25.7383 | 10/14/2010 15:44:01 | 28.3   |
| 10/13/2010 18:29:01 | 25.7383 | 10/14/2010 16:04:01 | 28.362 |
| 10/13/2010 18:49:01 | 25.8003 | 10/14/2010 16:24:01 | 28.362 |
| 10/13/2010 19:09:01 | 25.8003 | 10/14/2010 16:44:01 | 28.362 |
| 10/13/2010 19:29:01 | 25.8003 | 10/14/2010 17:04:01 | 28.362 |
| 10/13/2010 19:49:01 | 25.8003 | 10/14/2010 17:24:01 | 28.424 |
| 10/13/2010 20:09:01 | 25.8633 | 10/14/2010 17:44:01 | 28.424 |
| 10/13/2010 20:29:01 | 25.8633 | 10/14/2010 18:04:01 | 28.424 |
| 10/13/2010 20:49:01 | 25.8633 | 10/14/2010 18:24:01 | 28.487 |
| 10/13/2010 21:09:01 | 25.8633 | 10/14/2010 18:44:01 | 28.487 |
| 10/13/2010 21:29:01 | 25.8633 | 10/14/2010 19:04:01 | 28.487 |
| 10/13/2010 21:49:01 | 25.8633 | 10/14/2010 19:24:01 | 28.549 |
| 10/13/2010 22:09:01 | 25.8633 | 10/14/2010 19:44:01 | 28.549 |
| 10/13/2010 22:29:01 | 25.8633 | 10/14/2010 20:04:01 | 28.612 |



|                     |         |                     |        |
|---------------------|---------|---------------------|--------|
| 10/13/2010 22:49:01 | 25.8633 | 10/14/2010 20:24:01 | 28.612 |
| 10/13/2010 23:09:01 | 25.8633 | 10/14/2010 20:44:01 | 28.612 |
| 10/13/2010 23:29:01 | 25.8633 | 10/14/2010 21:04:01 | 28.674 |
| 10/13/2010 23:49:01 | 25.8633 | 10/14/2010 21:24:01 | 28.674 |
| 10/14/2010 00:09:01 | 25.8633 | 10/14/2010 21:44:01 | 28.737 |
| 10/14/2010 00:29:01 | 25.8633 | 10/14/2010 22:04:01 | 28.737 |
| 10/14/2010 00:49:01 | 25.8633 | 10/14/2010 22:24:01 | 28.737 |
| 10/14/2010 01:09:01 | 25.8003 | 10/14/2010 22:44:01 | 28.799 |
| 10/14/2010 01:29:01 | 25.8003 | 10/14/2010 23:04:01 | 28.799 |
| 10/14/2010 01:49:01 | 25.8003 | 10/14/2010 23:24:01 | 28.799 |
| 10/14/2010 02:09:01 | 25.8003 | 10/14/2010 23:44:01 | 28.861 |
| 10/14/2010 02:29:01 | 25.8003 | 10/15/2010 00:04:01 | 28.861 |
| 10/14/2010 02:49:01 | 25.7383 | 10/15/2010 00:24:01 | 28.861 |
| 10/14/2010 03:09:01 | 25.7383 | 10/15/2010 00:44:01 | 28.861 |
| 10/14/2010 03:29:01 | 25.7383 | 10/15/2010 01:04:01 | 28.861 |
| 10/14/2010 03:49:01 | 25.7383 | 10/15/2010 01:24:01 | 28.861 |
| 10/14/2010 04:09:01 | 25.7383 | 10/15/2010 01:44:01 | 28.861 |
| 10/14/2010 04:29:01 | 25.6753 | 10/15/2010 02:04:01 | 28.861 |
| 10/14/2010 04:49:01 | 25.6753 | 10/15/2010 02:24:01 | 28.861 |
| 10/14/2010 05:09:01 | 25.6753 | 10/15/2010 02:44:01 | 28.861 |
| 10/14/2010 05:29:01 | 25.6133 | 10/15/2010 03:04:01 | 28.924 |
| 10/14/2010 05:49:01 | 25.6133 | 10/15/2010 03:24:01 | 28.861 |
| 10/14/2010 06:09:01 | 25.6133 | 10/15/2010 03:44:01 | 28.861 |
| 10/14/2010 06:29:01 | 25.5503 | 10/15/2010 04:04:01 | 28.861 |
| 10/14/2010 06:49:01 | 25.5503 | 10/15/2010 04:24:01 | 28.861 |
| 10/14/2010 07:09:01 | 25.5503 | 10/15/2010 04:44:01 | 28.861 |
| 10/14/2010 07:29:01 | 25.4883 | 10/15/2010 05:04:01 | 28.861 |
| 10/14/2010 07:49:01 | 25.4883 | 10/15/2010 05:24:01 | 28.861 |
| 10/14/2010 08:09:01 | 25.4883 | 10/15/2010 05:44:01 | 28.861 |
| 10/14/2010 08:29:01 | 25.4253 | 10/15/2010 06:04:01 | 28.861 |
| 10/14/2010 08:49:01 | 25.4253 | 10/15/2010 06:24:01 | 28.799 |
| 10/14/2010 09:09:01 | 25.4253 | 10/15/2010 06:44:01 | 28.799 |
| 10/14/2010 09:29:01 | 25.3633 | 10/15/2010 07:04:01 | 28.799 |
| 10/14/2010 09:49:01 | 25.3633 | 10/15/2010 07:24:01 | 28.799 |
| 10/14/2010 10:09:01 | 25.3633 | 10/15/2010 07:44:01 | 28.737 |
| 10/14/2010 10:29:01 | 25.3633 | 10/15/2010 08:04:01 | 28.737 |
| 10/14/2010 10:49:01 | 25.3003 | 10/15/2010 08:24:01 | 28.737 |
| 10/14/2010 11:09:01 | 25.3003 | 10/15/2010 08:44:01 | 28.674 |
| 10/14/2010 11:29:01 | 25.3003 | 10/15/2010 09:04:01 | 28.674 |
| 10/14/2010 11:49:01 | 25.3003 | 10/15/2010 09:24:01 | 28.674 |
| 10/14/2010 12:09:01 | 25.3003 | 10/15/2010 09:44:01 | 28.674 |
| 10/14/2010 12:29:01 | 25.3003 | 10/15/2010 10:04:01 | 28.612 |
| 10/14/2010 12:49:01 | 25.3003 | 10/15/2010 10:24:01 | 28.612 |
| 10/14/2010 13:09:01 | 25.3003 | 10/15/2010 10:44:01 | 28.549 |
| 10/14/2010 13:29:01 | 25.3003 | 10/15/2010 11:04:01 | 28.549 |
| 10/14/2010 13:49:01 | 25.3633 | 10/15/2010 11:24:01 | 28.549 |
| 10/14/2010 14:09:01 | 25.3633 | 10/15/2010 11:44:01 | 28.487 |
| 10/14/2010 14:29:01 | 25.3633 | 10/15/2010 12:04:01 | 28.487 |
| 10/14/2010 14:49:01 | 25.3633 | 10/15/2010 12:24:01 | 28.487 |
| 10/14/2010 15:09:01 | 25.4253 | 10/15/2010 12:44:01 | 28.424 |

|                     |         |                     |        |
|---------------------|---------|---------------------|--------|
| 10/14/2010 15:29:01 | 25.4253 | 10/15/2010 13:04:01 | 28.424 |
| 10/14/2010 15:49:01 | 25.4253 | 10/15/2010 13:24:01 | 28.424 |
| 10/14/2010 16:09:01 | 25.4883 | 10/15/2010 13:44:01 | 28.424 |
| 10/14/2010 16:29:01 | 25.4883 | 10/15/2010 14:04:01 | 28.362 |
| 10/14/2010 16:49:01 | 25.5503 | 10/15/2010 14:24:01 | 28.362 |
| 10/14/2010 17:09:01 | 25.5503 | 10/15/2010 14:44:01 | 28.362 |
| 10/14/2010 17:29:01 | 25.5503 | 10/15/2010 15:04:01 | 28.362 |
| 10/14/2010 17:49:01 | 25.6133 | 10/15/2010 15:24:01 | 28.362 |
| 10/14/2010 18:09:01 | 25.6133 | 10/15/2010 15:44:01 | 28.362 |
| 10/14/2010 18:29:01 | 25.6133 | 10/15/2010 16:04:01 | 28.362 |
| 10/14/2010 18:49:01 | 25.6753 | 10/15/2010 16:24:01 | 28.424 |
| 10/14/2010 19:09:01 | 25.6753 | 10/15/2010 16:44:01 | 28.424 |
| 10/14/2010 19:29:01 | 25.6753 | 10/15/2010 17:04:01 | 28.424 |
| 10/14/2010 19:49:01 | 25.7383 | 10/15/2010 17:24:01 | 28.424 |
| 10/14/2010 20:09:01 | 25.7383 | 10/15/2010 17:44:01 | 28.487 |
| 10/14/2010 20:29:01 | 25.7383 | 10/15/2010 18:04:01 | 28.487 |
| 10/14/2010 20:49:01 | 25.7383 | 10/15/2010 18:24:01 | 28.487 |
| 10/14/2010 21:09:01 | 25.7383 | 10/15/2010 18:44:01 | 28.487 |
| 10/14/2010 21:29:01 | 25.7383 | 10/15/2010 19:04:01 | 28.549 |
| 10/14/2010 21:49:01 | 25.7383 | 10/15/2010 19:24:01 | 28.549 |
| 10/14/2010 22:09:01 | 25.8003 | 10/15/2010 19:44:01 | 28.612 |
| 10/14/2010 22:29:01 | 25.8003 | 10/15/2010 20:04:01 | 28.612 |
| 10/14/2010 22:49:01 | 25.8003 | 10/15/2010 20:24:01 | 28.612 |
| 10/14/2010 23:09:01 | 25.8003 | 10/15/2010 20:44:01 | 28.674 |
| 10/14/2010 23:29:01 | 25.8003 | 10/15/2010 21:04:01 | 28.674 |
| 10/14/2010 23:49:01 | 25.8003 | 10/15/2010 21:24:01 | 28.674 |
| 10/15/2010 00:09:01 | 25.7383 | 10/15/2010 21:44:01 | 28.674 |
| 10/15/2010 00:29:01 | 25.7383 | 10/15/2010 22:04:01 | 28.737 |
| 10/15/2010 00:49:01 | 25.7383 | 10/15/2010 22:24:01 | 28.737 |
| 10/15/2010 01:09:01 | 25.7383 | 10/15/2010 22:44:01 | 28.737 |
| 10/15/2010 01:29:01 | 25.7383 | 10/15/2010 23:04:01 | 28.737 |
| 10/15/2010 01:49:01 | 25.7383 | 10/15/2010 23:24:01 | 28.799 |
| 10/15/2010 02:09:01 | 25.7383 | 10/15/2010 23:44:01 | 28.799 |
| 10/15/2010 02:29:01 | 25.6753 | 10/16/2010 00:04:01 | 28.799 |
| 10/15/2010 02:49:01 | 25.6753 | 10/16/2010 00:24:01 | 28.799 |
| 10/15/2010 03:09:01 | 25.6753 | 10/16/2010 00:44:01 | 28.799 |
| 10/15/2010 03:29:01 | 25.6753 | 10/16/2010 01:04:01 | 28.861 |
| 10/15/2010 03:49:01 | 25.6753 | 10/16/2010 01:24:01 | 28.861 |
| 10/15/2010 04:09:01 | 25.6133 | 10/16/2010 01:44:01 | 28.861 |
| 10/15/2010 04:29:01 | 25.6133 | 10/16/2010 02:04:01 | 28.861 |
| 10/15/2010 04:49:01 | 25.6133 | 10/16/2010 02:24:01 | 28.861 |
| 10/15/2010 05:09:01 | 25.6133 | 10/16/2010 02:44:01 | 28.861 |
| 10/15/2010 05:29:01 | 25.5503 | 10/16/2010 03:04:01 | 28.861 |
| 10/15/2010 05:49:01 | 25.5503 | 10/16/2010 03:24:01 | 28.861 |
| 10/15/2010 06:09:01 | 25.5503 | 10/16/2010 03:44:01 | 28.861 |
| 10/15/2010 06:29:01 | 25.5503 | 10/16/2010 04:04:01 | 28.861 |
| 10/15/2010 06:49:01 | 25.4883 | 10/16/2010 04:24:01 | 28.861 |
| 10/15/2010 07:09:01 | 25.4883 | 10/16/2010 04:44:01 | 28.799 |
| 10/15/2010 07:29:01 | 25.4883 | 10/16/2010 05:04:01 | 28.799 |
| 10/15/2010 07:49:01 | 25.4253 | 10/16/2010 05:24:01 | 28.799 |

|                     |         |                     |        |
|---------------------|---------|---------------------|--------|
| 10/15/2010 08:09:01 | 25.4253 | 10/16/2010 05:44:01 | 28.799 |
| 10/15/2010 08:29:01 | 25.4253 | 10/16/2010 06:04:01 | 28.799 |
| 10/15/2010 08:49:01 | 25.3633 | 10/16/2010 06:24:01 | 28.799 |
| 10/15/2010 09:09:01 | 25.3633 | 10/16/2010 06:44:01 | 28.737 |
| 10/15/2010 09:29:01 | 25.3633 | 10/16/2010 07:04:01 | 28.737 |
| 10/15/2010 09:49:01 | 25.3003 | 10/16/2010 07:24:01 | 28.737 |
| 10/15/2010 10:09:01 | 25.3003 | 10/16/2010 07:44:01 | 28.737 |
| 10/15/2010 10:29:01 | 25.3003 | 10/16/2010 08:04:01 | 28.737 |
| 10/15/2010 10:49:01 | 25.3003 | 10/16/2010 08:24:01 | 28.674 |
| 10/15/2010 11:09:01 | 25.3003 | 10/16/2010 08:44:01 | 28.674 |
| 10/15/2010 11:29:01 | 25.2383 | 10/16/2010 09:04:01 | 28.674 |
| 10/15/2010 11:49:01 | 25.2383 | 10/16/2010 09:24:01 | 28.612 |
| 10/15/2010 12:09:01 | 25.2383 | 10/16/2010 09:44:01 | 28.612 |
| 10/15/2010 12:29:01 | 25.2383 | 10/16/2010 10:04:01 | 28.612 |
| 10/15/2010 12:49:01 | 25.2383 | 10/16/2010 10:24:01 | 28.549 |
| 10/15/2010 13:09:01 | 25.3003 | 10/16/2010 10:44:01 | 28.549 |
| 10/15/2010 13:29:01 | 25.3003 | 10/16/2010 11:04:01 | 28.549 |
| 10/15/2010 13:49:01 | 25.3003 | 10/16/2010 11:24:01 | 28.487 |
| 10/15/2010 14:09:01 | 25.3003 | 10/16/2010 11:44:01 | 28.487 |
| 10/15/2010 14:29:01 | 25.3003 | 10/16/2010 12:04:01 | 28.487 |
| 10/15/2010 14:49:01 | 25.3633 | 10/16/2010 12:24:01 | 28.424 |
| 10/15/2010 15:09:01 | 25.3633 | 10/16/2010 12:44:01 | 28.424 |
| 10/15/2010 15:29:01 | 25.3633 | 10/16/2010 13:04:01 | 28.424 |
| 10/15/2010 15:49:01 | 25.4253 | 10/16/2010 13:24:01 | 28.424 |
| 10/15/2010 16:09:01 | 25.4253 | 10/16/2010 13:44:01 | 28.424 |
| 10/15/2010 16:29:01 | 25.4253 | 10/16/2010 14:04:01 | 28.424 |
| 10/15/2010 16:49:01 | 25.4883 | 10/16/2010 14:24:01 | 28.362 |
| 10/15/2010 17:09:01 | 25.4883 | 10/16/2010 14:44:01 | 28.424 |
| 10/15/2010 17:29:01 | 25.4883 | 10/16/2010 15:04:01 | 28.362 |
| 10/15/2010 17:49:01 | 25.5503 | 10/16/2010 15:24:01 | 28.424 |
| 10/15/2010 18:09:01 | 25.5503 | 10/16/2010 15:44:01 | 28.424 |
| 10/15/2010 18:29:01 | 25.6133 | 10/16/2010 16:04:01 | 28.424 |
| 10/15/2010 18:49:01 | 25.6133 | 10/16/2010 16:24:01 | 28.424 |
| 10/15/2010 19:09:01 | 25.6133 | 10/16/2010 16:44:01 | 28.424 |
| 10/15/2010 19:29:01 | 25.6753 | 10/16/2010 17:04:01 | 28.487 |
| 10/15/2010 19:49:01 | 25.6753 | 10/16/2010 17:24:01 | 28.487 |
| 10/15/2010 20:09:01 | 25.6753 | 10/16/2010 17:44:01 | 28.487 |
| 10/15/2010 20:29:01 | 25.6753 | 10/16/2010 18:04:01 | 28.549 |
| 10/15/2010 20:49:01 | 25.6753 | 10/16/2010 18:24:01 | 28.549 |
| 10/15/2010 21:09:01 | 25.7383 | 10/16/2010 18:44:01 | 28.612 |
| 10/15/2010 21:29:01 | 25.7383 | 10/16/2010 19:04:01 | 28.612 |
| 10/15/2010 21:49:01 | 25.7383 | 10/16/2010 19:24:01 | 28.612 |
| 10/15/2010 22:09:01 | 25.7383 | 10/16/2010 19:44:01 | 28.674 |
| 10/15/2010 22:29:01 | 25.7383 | 10/16/2010 20:04:01 | 28.674 |
| 10/15/2010 22:49:01 | 25.7383 | 10/16/2010 20:24:01 | 28.737 |
| 10/15/2010 23:09:01 | 25.7383 | 10/16/2010 20:44:01 | 28.737 |
| 10/15/2010 23:29:01 | 25.7383 | 10/16/2010 21:04:01 | 28.799 |
| 10/15/2010 23:49:01 | 25.7383 | 10/16/2010 21:24:01 | 28.799 |
| 10/16/2010 00:09:01 | 25.7383 | 10/16/2010 21:44:01 | 28.799 |
| 10/16/2010 00:29:01 | 25.7383 | 10/16/2010 22:04:01 | 28.861 |

|                     |         |                     |        |
|---------------------|---------|---------------------|--------|
| 10/16/2010 00:49:01 | 25.7383 | 10/16/2010 22:24:01 | 28.861 |
| 10/16/2010 01:09:01 | 25.7383 | 10/16/2010 22:44:01 | 28.861 |
| 10/16/2010 01:29:01 | 25.6753 | 10/16/2010 23:04:01 | 28.924 |
| 10/16/2010 01:49:01 | 25.6753 | 10/16/2010 23:24:01 | 28.924 |
| 10/16/2010 02:09:01 | 25.6753 | 10/16/2010 23:44:01 | 28.924 |
| 10/16/2010 02:29:01 | 25.6753 | 10/17/2010 00:04:01 | 28.924 |
| 10/16/2010 02:49:01 | 25.6753 | 10/17/2010 00:24:01 | 28.986 |
| 10/16/2010 03:09:01 | 25.6753 | 10/17/2010 00:44:01 | 28.986 |
| 10/16/2010 03:29:01 | 25.6753 | 10/17/2010 01:04:01 | 28.986 |
| 10/16/2010 03:49:01 | 25.6133 | 10/17/2010 01:24:01 | 28.986 |
| 10/16/2010 04:09:01 | 25.6133 | 10/17/2010 01:44:01 | 28.986 |
| 10/16/2010 04:29:01 | 25.6133 | 10/17/2010 02:04:01 | 28.986 |
| 10/16/2010 04:49:01 | 25.6133 | 10/17/2010 02:24:01 | 28.986 |
| 10/16/2010 05:09:01 | 25.6133 | 10/17/2010 02:44:01 | 28.986 |
| 10/16/2010 05:29:01 | 25.5503 | 10/17/2010 03:04:01 | 28.986 |
| 10/16/2010 05:49:01 | 25.5503 | 10/17/2010 03:24:01 | 28.986 |
| 10/16/2010 06:09:01 | 25.5503 | 10/17/2010 03:44:01 | 28.986 |
| 10/16/2010 06:29:01 | 25.5503 | 10/17/2010 04:04:01 | 28.986 |
| 10/16/2010 06:49:01 | 25.4883 | 10/17/2010 04:24:01 | 28.986 |
| 10/16/2010 07:09:01 | 25.4883 | 10/17/2010 04:44:01 | 28.986 |
| 10/16/2010 07:29:01 | 25.4883 | 10/17/2010 05:04:01 | 28.986 |
| 10/16/2010 07:49:01 | 25.4253 | 10/17/2010 05:24:01 | 28.986 |
| 10/16/2010 08:09:01 | 25.4253 | 10/17/2010 05:44:01 | 28.986 |
| 10/16/2010 08:29:01 | 25.4253 | 10/17/2010 06:04:01 | 28.924 |
| 10/16/2010 08:49:01 | 25.4253 | 10/17/2010 06:24:01 | 28.924 |
| 10/16/2010 09:09:01 | 25.4253 | 10/17/2010 06:44:01 | 28.924 |
| 10/16/2010 09:29:01 | 25.3633 | 10/17/2010 07:04:01 | 28.924 |
| 10/16/2010 09:49:01 | 25.3633 | 10/17/2010 07:24:01 | 28.861 |
| 10/16/2010 10:09:01 | 25.3633 | 10/17/2010 07:44:01 | 28.861 |
| 10/16/2010 10:29:01 | 25.3633 | 10/17/2010 08:04:01 | 28.861 |
| 10/16/2010 10:49:01 | 25.3633 | 10/17/2010 08:24:01 | 28.861 |
| 10/16/2010 11:09:01 | 25.3633 | 10/17/2010 08:44:01 | 28.799 |
| 10/16/2010 11:29:01 | 25.3633 | 10/17/2010 09:04:01 | 28.799 |
| 10/16/2010 11:49:01 | 25.3003 | 10/17/2010 09:24:01 | 28.799 |
| 10/16/2010 12:09:01 | 25.3003 | 10/17/2010 09:44:01 | 28.799 |
| 10/16/2010 12:29:01 | 25.3633 | 10/17/2010 10:04:01 | 28.737 |
| 10/16/2010 12:49:01 | 25.3633 | 10/17/2010 10:24:01 | 28.737 |
| 10/16/2010 13:09:01 | 25.3633 | 10/17/2010 10:44:01 | 28.737 |
| 10/16/2010 13:29:01 | 25.3633 | 10/17/2010 11:04:01 | 28.674 |
| 10/16/2010 13:49:01 | 25.3633 | 10/17/2010 11:24:01 | 28.674 |
| 10/16/2010 14:09:01 | 25.4253 | 10/17/2010 11:44:01 | 28.674 |
| 10/16/2010 14:29:01 | 25.4253 | 10/17/2010 12:04:01 | 28.612 |
| 10/16/2010 14:49:01 | 25.4253 | 10/17/2010 12:24:01 | 28.612 |
| 10/16/2010 15:09:01 | 25.4883 | 10/17/2010 12:44:01 | 28.612 |
| 10/16/2010 15:29:01 | 25.4883 | 10/17/2010 13:04:01 | 28.612 |
| 10/16/2010 15:49:01 | 25.4883 | 10/17/2010 13:24:01 | 28.549 |
| 10/16/2010 16:09:01 | 25.5503 | 10/17/2010 13:44:01 | 28.549 |
| 10/16/2010 16:29:01 | 25.5503 | 10/17/2010 14:04:01 | 28.549 |
| 10/16/2010 16:49:01 | 25.6133 | 10/17/2010 14:24:01 | 28.549 |
| 10/16/2010 17:09:01 | 25.6133 | 10/17/2010 14:44:01 | 28.549 |

|                     |         |                     |        |
|---------------------|---------|---------------------|--------|
| 10/16/2010 17:29:01 | 25.6133 | 10/17/2010 15:04:01 | 28.549 |
| 10/16/2010 17:49:01 | 25.6753 | 10/17/2010 15:24:01 | 28.549 |
| 10/16/2010 18:09:01 | 25.6753 | 10/17/2010 15:44:01 | 28.549 |
| 10/16/2010 18:29:01 | 25.6753 | 10/17/2010 16:04:01 | 28.549 |
| 10/16/2010 18:49:01 | 25.7383 | 10/17/2010 16:24:01 | 28.612 |
| 10/16/2010 19:09:01 | 25.7383 | 10/17/2010 16:44:01 | 28.612 |
| 10/16/2010 19:29:01 | 25.7383 | 10/17/2010 17:04:01 | 28.612 |
| 10/16/2010 19:49:01 | 25.8003 | 10/17/2010 17:24:01 | 28.674 |
| 10/16/2010 20:09:01 | 25.8003 | 10/17/2010 17:44:01 | 28.674 |
| 10/16/2010 20:29:01 | 25.8003 | 10/17/2010 18:04:01 | 28.674 |
| 10/16/2010 20:49:01 | 25.8003 | 10/17/2010 18:24:01 | 28.737 |
| 10/16/2010 21:09:01 | 25.8003 | 10/17/2010 18:44:01 | 28.737 |
| 10/16/2010 21:29:01 | 25.8003 | 10/17/2010 19:04:01 | 28.737 |
| 10/16/2010 21:49:01 | 25.8633 | 10/17/2010 19:24:01 | 28.799 |
| 10/16/2010 22:09:01 | 25.8633 | 10/17/2010 19:44:01 | 28.799 |
| 10/16/2010 22:29:01 | 25.8633 | 10/17/2010 20:04:01 | 28.861 |
| 10/16/2010 22:49:01 | 25.8003 | 10/17/2010 20:24:01 | 28.861 |
| 10/16/2010 23:09:01 | 25.8633 | 10/17/2010 20:44:01 | 28.924 |
| 10/16/2010 23:29:01 | 25.8003 | 10/17/2010 21:04:01 | 28.924 |
| 10/16/2010 23:49:01 | 25.8003 | 10/17/2010 21:24:01 | 28.924 |
| 10/17/2010 00:09:01 | 25.8003 | 10/17/2010 21:44:01 | 28.986 |
| 10/17/2010 00:29:01 | 25.8003 | 10/17/2010 22:04:01 | 28.986 |
| 10/17/2010 00:49:01 | 25.8003 | 10/17/2010 22:24:01 | 28.986 |
| 10/17/2010 01:09:01 | 25.8003 | 10/17/2010 22:44:01 | 29.049 |
| 10/17/2010 01:29:01 | 25.8003 | 10/17/2010 23:04:01 | 29.049 |
| 10/17/2010 01:49:01 | 25.8003 | 10/17/2010 23:24:01 | 29.049 |
| 10/17/2010 02:09:01 | 25.8003 | 10/17/2010 23:44:01 | 29.049 |
| 10/17/2010 02:29:01 | 25.7383 | 10/18/2010 00:04:01 | 29.111 |
| 10/17/2010 02:49:01 | 25.7383 | 10/18/2010 00:24:01 | 29.111 |
| 10/17/2010 03:09:01 | 25.7383 | 10/18/2010 00:44:01 | 29.111 |
| 10/17/2010 03:29:01 | 25.7383 | 10/18/2010 01:04:01 | 29.111 |
| 10/17/2010 03:49:01 | 25.7383 | 10/18/2010 01:24:01 | 29.111 |
| 10/17/2010 04:09:01 | 25.7383 | 10/18/2010 01:44:01 | 29.111 |
| 10/17/2010 04:29:01 | 25.6753 | 10/18/2010 02:04:01 | 29.111 |
| 10/17/2010 04:49:01 | 25.6753 | 10/18/2010 02:24:01 | 29.111 |
| 10/17/2010 05:09:01 | 25.6753 | 10/18/2010 02:44:01 | 29.111 |
| 10/17/2010 05:29:01 | 25.6133 | 10/18/2010 03:04:01 | 29.111 |
| 10/17/2010 05:49:01 | 25.6753 | 10/18/2010 03:24:01 | 29.111 |
| 10/17/2010 06:09:01 | 25.6133 | 10/18/2010 03:44:01 | 29.111 |
| 10/17/2010 06:29:01 | 25.6133 | 10/18/2010 04:04:01 | 29.111 |
| 10/17/2010 06:49:01 | 25.6133 | 10/18/2010 04:24:01 | 29.111 |
| 10/17/2010 07:09:01 | 25.5503 | 10/18/2010 04:44:01 | 29.111 |
| 10/17/2010 07:29:01 | 25.5503 | 10/18/2010 05:04:01 | 29.111 |
| 10/17/2010 07:49:01 | 25.5503 | 10/18/2010 05:24:01 | 29.111 |
| 10/17/2010 08:09:01 | 25.5503 | 10/18/2010 05:44:01 | 29.111 |
| 10/17/2010 08:29:01 | 25.4883 | 10/18/2010 06:04:01 | 29.111 |
| 10/17/2010 08:49:01 | 25.4883 | 10/18/2010 06:24:01 | 29.049 |
| 10/17/2010 09:09:01 | 25.4883 | 10/18/2010 06:44:01 | 29.049 |
| 10/17/2010 09:29:01 | 25.4883 | 10/18/2010 07:04:01 | 29.049 |
| 10/17/2010 09:49:01 | 25.4883 | 10/18/2010 07:24:01 | 29.049 |

|                     |         |                     |        |
|---------------------|---------|---------------------|--------|
| 10/17/2010 10:09:01 | 25.4253 | 10/18/2010 07:44:01 | 29.049 |
| 10/17/2010 10:29:01 | 25.4253 | 10/18/2010 08:04:01 | 28.986 |
| 10/17/2010 10:49:01 | 25.4253 | 10/18/2010 08:24:01 | 28.986 |
| 10/17/2010 11:09:01 | 25.4253 | 10/18/2010 08:44:01 | 28.986 |
| 10/17/2010 11:29:01 | 25.4253 | 10/18/2010 09:04:01 | 28.924 |
| 10/17/2010 11:49:01 | 25.4253 | 10/18/2010 09:24:01 | 28.924 |
| 10/17/2010 12:09:01 | 25.4253 | 10/18/2010 09:44:01 | 28.924 |
| 10/17/2010 12:29:01 | 25.4253 | 10/18/2010 10:04:01 | 28.861 |
| 10/17/2010 12:49:01 | 25.4253 | 10/18/2010 10:24:01 | 28.861 |
| 10/17/2010 13:09:01 | 25.4883 | 10/18/2010 10:44:01 | 28.861 |
| 10/17/2010 13:29:01 | 25.4883 | 10/18/2010 11:04:01 | 28.799 |
| 10/17/2010 13:49:01 | 25.4883 | 10/18/2010 11:24:01 | 28.799 |
| 10/17/2010 14:09:01 | 25.4883 | 10/18/2010 11:44:01 | 28.799 |
| 10/17/2010 14:29:01 | 25.5503 | 10/18/2010 12:04:01 | 28.737 |
| 10/17/2010 14:49:01 | 25.5503 | 10/18/2010 12:24:01 | 28.737 |
| 10/17/2010 15:09:01 | 25.6133 | 10/18/2010 12:44:01 | 28.737 |
| 10/17/2010 15:29:01 | 25.6133 | 10/18/2010 13:04:01 | 28.674 |
| 10/17/2010 15:49:01 | 25.6133 | 10/18/2010 13:24:01 | 28.674 |
| 10/17/2010 16:09:01 | 25.6753 | 10/18/2010 13:44:01 | 28.674 |
| 10/17/2010 16:29:01 | 25.6753 | 10/18/2010 14:04:01 | 28.674 |
| 10/17/2010 16:49:01 | 25.7383 | 10/18/2010 14:24:01 | 28.674 |
| 10/17/2010 17:09:01 | 25.7383 | 10/18/2010 14:44:01 | 28.674 |
| 10/17/2010 17:29:01 | 25.7383 | 10/18/2010 15:04:01 | 28.674 |
| 10/17/2010 17:49:01 | 25.8003 | 10/18/2010 15:24:01 | 28.674 |
| 10/17/2010 18:09:01 | 25.8003 | 10/18/2010 15:44:01 | 28.674 |
| 10/17/2010 18:29:01 | 25.8003 | 10/18/2010 16:04:01 | 28.674 |
| 10/17/2010 18:49:01 | 25.8633 | 10/18/2010 16:24:01 | 28.674 |
| 10/17/2010 19:09:01 | 25.8633 | 10/18/2010 16:44:01 | 28.674 |
| 10/17/2010 19:29:01 | 25.8633 | 10/18/2010 17:04:01 | 28.737 |
| 10/17/2010 19:49:01 | 25.9253 | 10/18/2010 17:24:01 | 28.737 |
| 10/17/2010 20:09:01 | 25.9253 | 10/18/2010 17:44:01 | 28.737 |
| 10/17/2010 20:29:01 | 25.9253 | 10/18/2010 18:04:01 | 28.799 |
| 10/17/2010 20:49:01 | 25.9253 | 10/18/2010 18:24:01 | 28.799 |
| 10/17/2010 21:09:01 | 25.9253 | 10/18/2010 18:44:01 | 28.799 |
| 10/17/2010 21:29:01 | 25.9253 | 10/18/2010 19:04:01 | 28.861 |
| 10/17/2010 21:49:01 | 25.9253 | 10/18/2010 19:24:01 | 28.861 |
| 10/17/2010 22:09:01 | 25.9883 | 10/18/2010 19:44:01 | 28.924 |
| 10/17/2010 22:29:01 | 25.9883 | 10/18/2010 20:04:01 | 28.924 |
| 10/17/2010 22:49:01 | 25.9883 | 10/18/2010 20:24:01 | 28.924 |
| 10/17/2010 23:09:01 | 25.9883 | 10/18/2010 20:44:01 | 28.986 |
| 10/17/2010 23:29:01 | 25.9253 | 10/18/2010 21:04:01 | 28.986 |
| 10/17/2010 23:49:01 | 25.9253 | 10/18/2010 21:24:01 | 29.049 |
| 10/18/2010 00:09:01 | 25.9253 | 10/18/2010 21:44:01 | 29.049 |
| 10/18/2010 00:29:01 | 25.9253 | 10/18/2010 22:04:01 | 29.049 |
| 10/18/2010 00:49:01 | 25.9253 | 10/18/2010 22:24:01 | 29.111 |
| 10/18/2010 01:09:01 | 25.9253 | 10/18/2010 22:44:01 | 29.111 |
| 10/18/2010 01:29:01 | 25.9253 | 10/18/2010 23:04:01 | 29.111 |
| 10/18/2010 01:49:01 | 25.9253 | 10/18/2010 23:24:01 | 29.174 |
| 10/18/2010 02:09:01 | 25.9253 | 10/18/2010 23:44:01 | 29.174 |
| 10/18/2010 02:29:01 | 25.9253 | 10/19/2010 00:04:01 | 29.174 |

|                     |         |                     |        |
|---------------------|---------|---------------------|--------|
| 10/18/2010 02:49:01 | 25.8633 | 10/19/2010 00:24:01 | 29.174 |
| 10/18/2010 03:09:01 | 25.8633 | 10/19/2010 00:44:01 | 29.174 |
| 10/18/2010 03:29:01 | 25.8633 | 10/19/2010 01:04:01 | 29.174 |
| 10/18/2010 03:49:01 | 25.8633 | 10/19/2010 01:24:01 | 29.174 |
| 10/18/2010 04:09:01 | 25.8633 | 10/19/2010 01:44:01 | 29.174 |
| 10/18/2010 04:29:01 | 25.8003 | 10/19/2010 02:04:01 | 29.174 |
| 10/18/2010 04:49:01 | 25.8003 | 10/19/2010 02:24:01 | 29.236 |
| 10/18/2010 05:09:01 | 25.8003 | 10/19/2010 02:44:01 | 29.236 |
| 10/18/2010 05:29:01 | 25.8003 | 10/19/2010 03:04:01 | 29.236 |
| 10/18/2010 05:49:01 | 25.8003 | 10/19/2010 03:24:01 | 29.236 |
| 10/18/2010 06:09:01 | 25.7383 | 10/19/2010 03:44:01 | 29.174 |
| 10/18/2010 06:29:01 | 25.7383 | 10/19/2010 04:04:01 | 29.174 |
| 10/18/2010 06:49:01 | 25.7383 | 10/19/2010 04:24:01 | 29.174 |
| 10/18/2010 07:09:01 | 25.7383 | 10/19/2010 04:44:01 | 29.174 |
| 10/18/2010 07:29:01 | 25.6753 | 10/19/2010 05:04:01 | 29.174 |
| 10/18/2010 07:49:01 | 25.6753 | 10/19/2010 05:24:01 | 29.174 |
| 10/18/2010 08:09:01 | 25.6753 | 10/19/2010 05:44:01 | 29.174 |
| 10/18/2010 08:29:01 | 25.6133 | 10/19/2010 06:04:01 | 29.174 |
| 10/18/2010 08:49:01 | 25.6133 | 10/19/2010 06:24:01 | 29.174 |
| 10/18/2010 09:09:01 | 25.6133 | 10/19/2010 06:44:01 | 29.111 |
| 10/18/2010 09:29:01 | 25.6133 | 10/19/2010 07:04:01 | 29.111 |
| 10/18/2010 09:49:01 | 25.5503 | 10/19/2010 07:24:01 | 29.111 |
| 10/18/2010 10:09:01 | 25.5503 | 10/19/2010 07:44:01 | 29.111 |
| 10/18/2010 10:29:01 | 25.5503 | 10/19/2010 08:04:01 | 29.049 |
| 10/18/2010 10:49:01 | 25.5503 | 10/19/2010 08:24:01 | 29.049 |
| 10/18/2010 11:09:01 | 25.5503 | 10/19/2010 08:44:01 | 29.049 |
| 10/18/2010 11:29:01 | 25.5503 | 10/19/2010 09:04:01 | 29.049 |
| 10/18/2010 11:49:01 | 25.4883 | 10/19/2010 09:24:01 | 28.986 |
| 10/18/2010 12:09:01 | 25.5503 | 10/19/2010 09:44:01 | 28.986 |
| 10/18/2010 12:29:01 | 25.4883 | 10/19/2010 10:04:01 | 28.986 |
| 10/18/2010 12:49:01 | 25.5503 | 10/19/2010 10:24:01 | 28.986 |
| 10/18/2010 13:09:01 | 25.5503 | 10/19/2010 10:44:01 | 28.924 |
| 10/18/2010 13:29:01 | 25.5503 | 10/19/2010 11:04:01 | 28.924 |
| 10/18/2010 13:49:01 | 25.5503 | 10/19/2010 11:24:01 | 28.924 |
| 10/18/2010 14:09:01 | 25.5503 | 10/19/2010 11:44:01 | 28.861 |
| 10/18/2010 14:29:01 | 25.6133 | 10/19/2010 12:04:01 | 28.861 |
| 10/18/2010 14:49:01 | 25.6133 | 10/19/2010 12:24:01 | 28.861 |
| 10/18/2010 15:09:01 | 25.6133 | 10/19/2010 12:44:01 | 28.861 |
| 10/18/2010 15:29:01 | 25.6753 | 10/19/2010 13:04:01 | 28.799 |
| 10/18/2010 15:49:01 | 25.6753 | 10/19/2010 13:24:01 | 28.799 |
| 10/18/2010 16:09:01 | 25.6753 | 10/19/2010 13:44:01 | 28.799 |
| 10/18/2010 16:29:01 | 25.6753 | 10/19/2010 14:04:01 | 28.799 |
| 10/18/2010 16:49:01 | 25.7383 | 10/19/2010 14:24:01 | 28.799 |
| 10/18/2010 17:09:01 | 25.7383 | 10/19/2010 14:44:01 | 28.799 |
| 10/18/2010 17:29:01 | 25.8003 | 10/19/2010 15:04:01 | 28.799 |
| 10/18/2010 17:49:01 | 25.8003 | 10/19/2010 15:24:01 | 28.799 |
| 10/18/2010 18:09:01 | 25.8003 | 10/19/2010 15:44:01 | 28.799 |
| 10/18/2010 18:29:01 | 25.8633 | 10/19/2010 16:04:01 | 28.799 |
| 10/18/2010 18:49:01 | 25.8633 | 10/19/2010 16:24:01 | 28.799 |
| 10/18/2010 19:09:01 | 25.8633 | 10/19/2010 16:44:01 | 28.799 |

|                     |         |                     |        |
|---------------------|---------|---------------------|--------|
| 10/18/2010 19:29:01 | 25.9253 | 10/19/2010 17:04:01 | 28.861 |
| 10/18/2010 19:49:01 | 25.9253 | 10/19/2010 17:24:01 | 28.861 |
| 10/18/2010 20:09:01 | 25.9253 | 10/19/2010 17:44:01 | 28.861 |
| 10/18/2010 20:29:01 | 25.9253 | 10/19/2010 18:04:01 | 28.861 |
| 10/18/2010 20:49:01 | 25.9253 | 10/19/2010 18:24:01 | 28.924 |
| 10/18/2010 21:09:01 | 25.9883 | 10/19/2010 18:44:01 | 28.924 |
| 10/18/2010 21:29:01 | 25.9883 | 10/19/2010 19:04:01 | 28.924 |
| 10/18/2010 21:49:01 | 25.9883 | 10/19/2010 19:24:01 | 28.924 |
| 10/18/2010 22:09:01 | 25.9883 | 10/19/2010 19:44:01 | 28.986 |
| 10/18/2010 22:29:01 | 25.9883 | 10/19/2010 20:04:01 | 28.986 |
| 10/18/2010 22:49:01 | 25.9883 | 10/19/2010 20:24:01 | 28.986 |
| 10/18/2010 23:09:01 | 25.9883 | 10/19/2010 20:44:01 | 28.986 |
| 10/18/2010 23:29:01 | 25.9883 | 10/19/2010 21:04:01 | 29.049 |
| 10/18/2010 23:49:01 | 25.9883 | 10/19/2010 21:24:01 | 29.049 |
| 10/19/2010 00:09:01 | 25.9883 | 10/19/2010 21:44:01 | 29.049 |
| 10/19/2010 00:29:01 | 25.9883 | 10/19/2010 22:04:01 | 29.049 |
| 10/19/2010 00:49:01 | 25.9253 | 10/19/2010 22:24:01 | 29.049 |
| 10/19/2010 01:09:01 | 25.9253 | 10/19/2010 22:44:01 | 29.111 |
| 10/19/2010 01:29:01 | 25.9253 | 10/19/2010 23:04:01 | 29.111 |
| 10/19/2010 01:49:01 | 25.9253 | 10/19/2010 23:24:01 | 29.111 |
| 10/19/2010 02:09:01 | 25.9253 | 10/19/2010 23:44:01 | 29.111 |
| 10/19/2010 02:29:01 | 25.9253 | 10/20/2010 00:04:01 | 29.111 |
| 10/19/2010 02:49:01 | 25.9253 | 10/20/2010 00:24:01 | 29.111 |
| 10/19/2010 03:09:01 | 25.9253 | 10/20/2010 00:44:01 | 29.111 |
| 10/19/2010 03:29:01 | 25.9253 | 10/20/2010 01:04:01 | 29.111 |
| 10/19/2010 03:49:01 | 25.8633 | 10/20/2010 01:24:01 | 29.111 |
| 10/19/2010 04:09:01 | 25.8633 | 10/20/2010 01:44:01 | 29.111 |
| 10/19/2010 04:29:01 | 25.8633 | 10/20/2010 02:04:01 | 29.111 |
| 10/19/2010 04:49:01 | 25.8633 | 10/20/2010 02:24:01 | 29.111 |
| 10/19/2010 05:09:01 | 25.8633 | 10/20/2010 02:44:01 | 29.111 |
| 10/19/2010 05:29:01 | 25.8633 | 10/20/2010 03:04:01 | 29.111 |
| 10/19/2010 05:49:01 | 25.8003 | 10/20/2010 03:24:01 | 29.111 |
| 10/19/2010 06:09:01 | 25.8003 | 10/20/2010 03:44:01 | 29.111 |
| 10/19/2010 06:29:01 | 25.8003 | 10/20/2010 04:04:01 | 29.111 |
| 10/19/2010 06:49:01 | 25.8003 | 10/20/2010 04:24:01 | 29.111 |
| 10/19/2010 07:09:01 | 25.8003 | 10/20/2010 04:44:01 | 29.049 |
| 10/19/2010 07:29:01 | 25.7383 | 10/20/2010 05:04:01 | 29.049 |
| 10/19/2010 07:49:01 | 25.7383 | 10/20/2010 05:24:01 | 29.049 |
| 10/19/2010 08:09:01 | 25.7383 | 10/20/2010 05:44:01 | 29.049 |
| 10/19/2010 08:29:01 | 25.7383 | 10/20/2010 06:04:01 | 29.049 |
| 10/19/2010 08:49:01 | 25.7383 | 10/20/2010 06:24:01 | 29.049 |
| 10/19/2010 09:09:01 | 25.6753 | 10/20/2010 06:44:01 | 28.986 |
| 10/19/2010 09:29:01 | 25.6753 | 10/20/2010 07:04:01 | 28.986 |
| 10/19/2010 09:49:01 | 25.6753 | 10/20/2010 07:24:01 | 28.986 |
| 10/19/2010 10:09:01 | 25.6753 | 10/20/2010 07:44:01 | 28.986 |
| 10/19/2010 10:29:01 | 25.6753 | 10/20/2010 08:04:01 | 28.986 |
| 10/19/2010 10:49:01 | 25.6753 | 10/20/2010 08:24:01 | 28.924 |
| 10/19/2010 11:09:01 | 25.6753 | 10/20/2010 08:44:01 | 28.924 |
| 10/19/2010 11:29:01 | 25.6753 | 10/20/2010 09:04:01 | 28.924 |
| 10/19/2010 11:49:01 | 25.6753 | 10/20/2010 09:24:01 | 28.861 |



|                     |         |                     |        |
|---------------------|---------|---------------------|--------|
| 10/19/2010 12:09:01 | 25.6753 | 10/20/2010 09:44:01 | 28.861 |
| 10/19/2010 12:29:01 | 25.6753 | 10/20/2010 10:04:01 | 28.861 |
| 10/19/2010 12:49:01 | 25.6753 | 10/20/2010 10:24:01 | 28.861 |
| 10/19/2010 13:09:01 | 25.6753 | 10/20/2010 10:44:01 | 28.799 |
| 10/19/2010 13:29:01 | 25.6753 | 10/20/2010 11:04:01 | 28.799 |
| 10/19/2010 13:49:01 | 25.6753 | 10/20/2010 11:24:01 | 28.799 |
| 10/19/2010 14:09:01 | 25.7383 | 10/20/2010 11:44:01 | 28.737 |
| 10/19/2010 14:29:01 | 25.7383 | 10/20/2010 12:04:01 | 28.737 |
| 10/19/2010 14:49:01 | 25.7383 | 10/20/2010 12:24:01 | 28.737 |
| 10/19/2010 15:09:01 | 25.8003 | 10/20/2010 12:44:01 | 28.737 |
| 10/19/2010 15:29:01 | 25.8003 | 10/20/2010 13:04:01 | 28.674 |
| 10/19/2010 15:49:01 | 25.8003 | 10/20/2010 13:24:01 | 28.674 |
| 10/19/2010 16:09:01 | 25.8003 | 10/20/2010 13:44:01 | 28.674 |
| 10/19/2010 16:29:01 | 25.8633 | 10/20/2010 14:04:01 | 28.674 |
| 10/19/2010 16:49:01 | 25.8633 | 10/20/2010 14:24:01 | 28.674 |
| 10/19/2010 17:09:01 | 25.8633 | 10/20/2010 14:44:01 | 28.674 |
| 10/19/2010 17:29:01 | 25.9253 | 10/20/2010 15:04:01 | 28.612 |
| 10/19/2010 17:49:01 | 25.9253 | 10/20/2010 15:24:01 | 28.612 |
| 10/19/2010 18:09:01 | 25.9253 | 10/20/2010 15:44:01 | 28.612 |
| 10/19/2010 18:29:01 | 25.9253 | 10/20/2010 16:04:01 | 28.612 |
| 10/19/2010 18:49:01 | 25.9883 | 10/20/2010 16:24:01 | 28.612 |
| 10/19/2010 19:09:01 | 25.9883 | 10/20/2010 16:44:01 | 28.612 |
| 10/19/2010 19:29:01 | 25.9883 | 10/20/2010 17:04:01 | 28.612 |
| 10/19/2010 19:49:01 | 25.9883 | 10/20/2010 17:24:01 | 28.674 |
| 10/19/2010 20:09:01 | 25.9883 | 10/20/2010 17:44:01 | 28.674 |
| 10/19/2010 20:29:01 | 25.9883 | 10/20/2010 18:04:01 | 28.674 |
| 10/19/2010 20:49:01 | 26.0503 | 10/20/2010 18:24:01 | 28.674 |
| 10/19/2010 21:09:01 | 26.0503 | 10/20/2010 18:44:01 | 28.674 |
| 10/19/2010 21:29:01 | 26.0503 | 10/20/2010 19:04:01 | 28.674 |
| 10/19/2010 21:49:01 | 26.0503 | 10/20/2010 19:24:01 | 28.674 |
| 10/19/2010 22:09:01 | 26.0503 | 10/20/2010 19:44:01 | 28.737 |
| 10/19/2010 22:29:01 | 26.0503 | 10/20/2010 20:04:01 | 28.737 |
| 10/19/2010 22:49:01 | 26.0503 | 10/20/2010 20:24:01 | 28.737 |
| 10/19/2010 23:09:01 | 26.0503 | 10/20/2010 20:44:01 | 28.737 |
| 10/19/2010 23:29:01 | 26.0503 | 10/20/2010 21:04:01 | 28.799 |
| 10/19/2010 23:49:01 | 26.0503 | 10/20/2010 21:24:01 | 28.799 |
| 10/20/2010 00:09:01 | 26.0503 | 10/20/2010 21:44:01 | 28.799 |
| 10/20/2010 00:29:01 | 26.0503 | 10/20/2010 22:04:01 | 28.799 |
| 10/20/2010 00:49:01 | 26.0503 | 10/20/2010 22:24:01 | 28.861 |
| 10/20/2010 01:09:01 | 26.0503 | 10/20/2010 22:44:01 | 28.861 |
| 10/20/2010 01:29:01 | 25.9883 | 10/20/2010 23:04:01 | 28.861 |
| 10/20/2010 01:49:01 | 25.9883 | 10/20/2010 23:24:01 | 28.861 |
| 10/20/2010 02:09:01 | 25.9883 | 10/20/2010 23:44:01 | 28.861 |
| 10/20/2010 02:29:01 | 25.9883 | 10/21/2010 00:04:01 | 28.861 |
| 10/20/2010 02:49:01 | 25.9883 | 10/21/2010 00:24:01 | 28.861 |
| 10/20/2010 03:09:01 | 25.9883 | 10/21/2010 00:44:01 | 28.861 |
| 10/20/2010 03:29:01 | 25.9883 | 10/21/2010 01:04:01 | 28.861 |
| 10/20/2010 03:49:01 | 25.9883 | 10/21/2010 01:24:01 | 28.924 |
| 10/20/2010 04:09:01 | 25.9883 | 10/21/2010 01:44:01 | 28.924 |
| 10/20/2010 04:29:01 | 25.9253 | 10/21/2010 02:04:01 | 28.924 |

|                     |         |                     |        |
|---------------------|---------|---------------------|--------|
| 10/20/2010 04:49:01 | 25.9253 | 10/21/2010 02:24:01 | 28.924 |
| 10/20/2010 05:09:01 | 25.9253 | 10/21/2010 02:44:01 | 28.924 |
| 10/20/2010 05:29:01 | 25.9253 | 10/21/2010 03:04:01 | 28.924 |
| 10/20/2010 05:49:01 | 25.9253 | 10/21/2010 03:24:01 | 28.924 |
| 10/20/2010 06:09:01 | 25.9253 | 10/21/2010 03:44:01 | 28.924 |
| 10/20/2010 06:29:01 | 25.8633 | 10/21/2010 04:04:01 | 28.924 |
| 10/20/2010 06:49:01 | 25.8633 | 10/21/2010 04:24:01 | 28.861 |
| 10/20/2010 07:09:01 | 25.8633 | 10/21/2010 04:44:01 | 28.861 |
| 10/20/2010 07:29:01 | 25.8633 | 10/21/2010 05:04:01 | 28.861 |
| 10/20/2010 07:49:01 | 25.8633 | 10/21/2010 05:24:01 | 28.861 |
| 10/20/2010 08:09:01 | 25.8003 | 10/21/2010 05:44:01 | 28.861 |
| 10/20/2010 08:29:01 | 25.8003 | 10/21/2010 06:04:01 | 28.861 |
| 10/20/2010 08:49:01 | 25.8003 | 10/21/2010 06:24:01 | 28.861 |
| 10/20/2010 09:09:01 | 25.8003 | 10/21/2010 06:44:01 | 28.799 |
| 10/20/2010 09:29:01 | 25.8003 | 10/21/2010 07:04:01 | 28.799 |
| 10/20/2010 09:49:01 | 25.8003 | 10/21/2010 07:24:01 | 28.799 |
| 10/20/2010 10:09:01 | 25.7383 | 10/21/2010 07:44:01 | 28.799 |
| 10/20/2010 10:29:01 | 25.7383 | 10/21/2010 08:04:01 | 28.737 |
| 10/20/2010 10:49:01 | 25.7383 | 10/21/2010 08:24:01 | 28.737 |
| 10/20/2010 11:09:01 | 25.7383 | 10/21/2010 08:44:01 | 28.737 |
| 10/20/2010 11:29:01 | 25.7383 | 10/21/2010 09:04:01 | 28.737 |
| 10/20/2010 11:49:01 | 25.7383 | 10/21/2010 09:24:01 | 28.737 |
| 10/20/2010 12:09:01 | 25.7383 | 10/21/2010 09:44:01 | 28.674 |
| 10/20/2010 12:29:01 | 25.7383 | 10/21/2010 10:04:01 | 28.674 |
| 10/20/2010 12:49:01 | 25.7383 | 10/21/2010 10:24:01 | 28.674 |
| 10/20/2010 13:09:01 | 25.7383 | 10/21/2010 10:44:01 | 28.674 |
| 10/20/2010 13:29:01 | 25.8003 | 10/21/2010 11:04:01 | 28.612 |
| 10/20/2010 13:49:01 | 25.8003 | 10/21/2010 11:24:01 | 28.612 |
| 10/20/2010 14:09:01 | 25.8003 | 10/21/2010 11:44:01 | 28.612 |
| 10/20/2010 14:29:01 | 25.8003 | 10/21/2010 12:04:01 | 28.549 |
| 10/20/2010 14:49:01 | 25.8003 | 10/21/2010 12:24:01 | 28.549 |
| 10/20/2010 15:09:01 | 25.8633 | 10/21/2010 12:44:01 | 28.549 |
| 10/20/2010 15:29:01 | 25.8633 | 10/21/2010 13:04:01 | 28.549 |
| 10/20/2010 15:49:01 | 25.8633 | 10/21/2010 13:24:01 | 28.549 |
| 10/20/2010 16:09:01 | 25.9253 | 10/21/2010 13:44:01 | 28.549 |
| 10/20/2010 16:29:01 | 25.9253 | 10/21/2010 14:04:01 | 28.549 |
| 10/20/2010 16:49:01 | 25.9253 | 10/21/2010 14:24:01 | 28.549 |
| 10/20/2010 17:09:01 | 25.9883 | 10/21/2010 14:44:01 | 28.487 |
| 10/20/2010 17:29:01 | 25.9883 | 10/21/2010 15:04:01 | 28.549 |
| 10/20/2010 17:49:01 | 25.9883 | 10/21/2010 15:24:01 | 28.549 |
| 10/20/2010 18:09:01 | 25.9883 | 10/21/2010 15:44:01 | 28.549 |
| 10/20/2010 18:29:01 | 26.0503 | 10/21/2010 16:04:01 | 28.549 |
| 10/20/2010 18:49:01 | 26.0503 | 10/21/2010 16:24:01 | 28.549 |
| 10/20/2010 19:09:01 | 26.0503 | 10/21/2010 16:44:01 | 28.549 |
| 10/20/2010 19:29:01 | 26.1133 | 10/21/2010 17:04:01 | 28.612 |
| 10/20/2010 19:49:01 | 26.1133 | 10/21/2010 17:24:01 | 28.612 |
| 10/20/2010 20:09:01 | 26.1133 | 10/21/2010 17:44:01 | 28.612 |
| 10/20/2010 20:29:01 | 26.1133 | 10/21/2010 18:04:01 | 28.674 |
| 10/20/2010 20:49:01 | 26.1133 | 10/21/2010 18:24:01 | 28.674 |
| 10/20/2010 21:09:01 | 26.1753 | 10/21/2010 18:44:01 | 28.674 |

|                     |         |                     |        |
|---------------------|---------|---------------------|--------|
| 10/20/2010 21:29:01 | 26.1753 | 10/21/2010 19:04:01 | 28.737 |
| 10/20/2010 21:49:01 | 26.1753 | 10/21/2010 19:24:01 | 28.737 |
| 10/20/2010 22:09:01 | 26.1753 | 10/21/2010 19:44:01 | 28.799 |
| 10/20/2010 22:29:01 | 26.1753 | 10/21/2010 20:04:01 | 28.799 |
| 10/20/2010 22:49:01 | 26.1753 | 10/21/2010 20:24:01 | 28.861 |
| 10/20/2010 23:09:01 | 26.1753 | 10/21/2010 20:44:01 | 28.861 |
| 10/20/2010 23:29:01 | 26.1753 | 10/21/2010 21:04:01 | 28.861 |
| 10/20/2010 23:49:01 | 26.1753 | 10/21/2010 21:24:01 | 28.924 |
| 10/21/2010 00:09:01 | 26.1753 | 10/21/2010 21:44:01 | 28.924 |
| 10/21/2010 00:29:01 | 26.1753 | 10/21/2010 22:04:01 | 28.986 |
| 10/21/2010 00:49:01 | 26.1753 | 10/21/2010 22:24:01 | 28.986 |
| 10/21/2010 01:09:01 | 26.1753 | 10/21/2010 22:44:01 | 28.986 |
| 10/21/2010 01:29:01 | 26.1133 | 10/21/2010 23:04:01 | 28.986 |
| 10/21/2010 01:49:01 | 26.1133 | 10/21/2010 23:24:01 | 28.986 |
| 10/21/2010 02:09:01 | 26.1133 | 10/21/2010 23:44:01 | 29.049 |
| 10/21/2010 02:29:01 | 26.1133 | 10/22/2010 00:04:01 | 29.049 |
| 10/21/2010 02:49:01 | 26.1133 | 10/22/2010 00:24:01 | 29.049 |
| 10/21/2010 03:09:01 | 26.1133 | 10/22/2010 00:44:01 | 29.049 |
| 10/21/2010 03:29:01 | 26.1133 | 10/22/2010 01:04:01 | 29.111 |
| 10/21/2010 03:49:01 | 26.0503 | 10/22/2010 01:24:01 | 29.111 |
| 10/21/2010 04:09:01 | 26.0503 | 10/22/2010 01:44:01 | 29.111 |
| 10/21/2010 04:29:01 | 26.0503 | 10/22/2010 02:04:01 | 29.111 |
| 10/21/2010 04:49:01 | 26.0503 | 10/22/2010 02:24:01 | 29.111 |
| 10/21/2010 05:09:01 | 26.0503 | 10/22/2010 02:44:01 | 29.111 |
| 10/21/2010 05:29:01 | 25.9883 | 10/22/2010 03:04:01 | 29.111 |
| 10/21/2010 05:49:01 | 25.9883 | 10/22/2010 03:24:01 | 29.111 |
| 10/21/2010 06:09:01 | 25.9883 | 10/22/2010 03:44:01 | 29.111 |
| 10/21/2010 06:29:01 | 25.9883 | 10/22/2010 04:04:01 | 29.111 |
| 10/21/2010 06:49:01 | 25.9883 | 10/22/2010 04:24:01 | 29.111 |
| 10/21/2010 07:09:01 | 25.9253 | 10/22/2010 04:44:01 | 29.111 |
| 10/21/2010 07:29:01 | 25.9253 | 10/22/2010 05:04:01 | 29.111 |
| 10/21/2010 07:49:01 | 25.9253 | 10/22/2010 05:24:01 | 29.111 |
| 10/21/2010 08:09:01 | 25.9253 | 10/22/2010 05:44:01 | 29.111 |
| 10/21/2010 08:29:01 | 25.9253 | 10/22/2010 06:04:01 | 29.111 |
| 10/21/2010 08:49:01 | 25.8633 | 10/22/2010 06:24:01 | 29.049 |
| 10/21/2010 09:09:01 | 25.8633 | 10/22/2010 06:44:01 | 29.049 |
| 10/21/2010 09:29:01 | 25.8633 | 10/22/2010 07:04:01 | 29.049 |
| 10/21/2010 09:49:01 | 25.8633 | 10/22/2010 07:24:01 | 29.049 |
| 10/21/2010 10:09:01 | 25.8633 | 10/22/2010 07:44:01 | 29.049 |
| 10/21/2010 10:29:01 | 25.8633 | 10/22/2010 08:04:01 | 28.986 |
| 10/21/2010 10:49:01 | 25.8003 | 10/22/2010 08:24:01 | 28.986 |
| 10/21/2010 11:09:01 | 25.8003 | 10/22/2010 08:44:01 | 28.986 |
| 10/21/2010 11:29:01 | 25.8003 | 10/22/2010 09:04:01 | 28.986 |
| 10/21/2010 11:49:01 | 25.8003 | 10/22/2010 09:24:01 | 28.924 |
| 10/21/2010 12:09:01 | 25.8003 | 10/22/2010 09:44:01 | 28.924 |
| 10/21/2010 12:29:01 | 25.8003 | 10/22/2010 10:04:01 | 28.924 |
| 10/21/2010 12:49:01 | 25.8003 | 10/22/2010 10:24:01 | 28.861 |
| 10/21/2010 13:09:01 | 25.8633 | 10/22/2010 10:44:01 | 28.861 |
| 10/21/2010 13:29:01 | 25.8633 | 10/22/2010 11:04:01 | 28.861 |
| 10/21/2010 13:49:01 | 25.8633 | 10/22/2010 11:24:01 | 28.799 |

|                     |         |                     |        |
|---------------------|---------|---------------------|--------|
| 10/21/2010 14:09:01 | 25.8633 | 10/22/2010 11:44:01 | 28.799 |
| 10/21/2010 14:29:01 | 25.9253 | 10/22/2010 12:04:01 | 28.799 |
| 10/21/2010 14:49:01 | 25.9253 | 10/22/2010 12:24:01 | 28.737 |
| 10/21/2010 15:09:01 | 25.9253 | 10/22/2010 12:44:01 | 28.737 |
| 10/21/2010 15:29:01 | 25.9253 | 10/22/2010 13:04:01 | 28.737 |
| 10/21/2010 15:49:01 | 25.9883 | 10/22/2010 13:24:01 | 28.674 |
| 10/21/2010 16:09:01 | 25.9883 | 10/22/2010 13:44:01 | 28.674 |
| 10/21/2010 16:29:01 | 25.9883 | 10/22/2010 14:04:01 | 28.674 |
| 10/21/2010 16:49:01 | 26.0503 | 10/22/2010 14:24:01 | 28.674 |
| 10/21/2010 17:09:01 | 26.0503 | 10/22/2010 14:44:01 | 28.674 |
| 10/21/2010 17:29:01 | 26.0503 | 10/22/2010 15:04:01 | 28.674 |
| 10/21/2010 17:49:01 | 26.1133 | 10/22/2010 15:24:01 | 28.674 |
| 10/21/2010 18:09:01 | 26.1133 | 10/22/2010 15:44:01 | 28.674 |
| 10/21/2010 18:29:01 | 26.1133 | 10/22/2010 16:04:01 | 28.674 |
| 10/21/2010 18:49:01 | 26.1753 | 10/22/2010 16:24:01 | 28.674 |
| 10/21/2010 19:09:01 | 26.1753 | 10/22/2010 16:44:01 | 28.674 |
| 10/21/2010 19:29:01 | 26.1753 | 10/22/2010 17:04:01 | 28.674 |
| 10/21/2010 19:49:01 | 26.2383 | 10/22/2010 17:24:01 | 28.674 |
| 10/21/2010 20:09:01 | 26.2383 | 10/22/2010 17:44:01 | 28.737 |
| 10/21/2010 20:29:01 | 26.2383 | 10/22/2010 18:04:01 | 28.737 |
| 10/21/2010 20:49:01 | 26.2383 | 10/22/2010 18:24:01 | 28.737 |
| 10/21/2010 21:09:01 | 26.2383 | 10/22/2010 18:44:01 | 28.737 |
| 10/21/2010 21:29:01 | 26.2383 | 10/22/2010 19:04:01 | 28.799 |
| 10/21/2010 21:49:01 | 26.2383 | 10/22/2010 19:24:01 | 28.799 |
| 10/21/2010 22:09:01 | 26.2383 | 10/22/2010 19:44:01 | 28.799 |
| 10/21/2010 22:29:01 | 26.2383 | 10/22/2010 20:04:01 | 28.799 |
| 10/21/2010 22:49:01 | 26.3003 | 10/22/2010 20:24:01 | 28.861 |
| 10/21/2010 23:09:01 | 26.3003 | 10/22/2010 20:44:01 | 28.861 |
| 10/21/2010 23:29:01 | 26.3003 | 10/22/2010 21:04:01 | 28.861 |
| 10/21/2010 23:49:01 | 26.3003 | 10/22/2010 21:24:01 | 28.924 |
| 10/22/2010 00:09:01 | 26.3003 | 10/22/2010 21:44:01 | 28.924 |
| 10/22/2010 00:29:01 | 26.3003 | 10/22/2010 22:04:01 | 28.924 |
| 10/22/2010 00:49:01 | 26.2383 | 10/22/2010 22:24:01 | 28.924 |
| 10/22/2010 01:09:01 | 26.2383 | 10/22/2010 22:44:01 | 28.986 |
| 10/22/2010 01:29:01 | 26.2383 | 10/22/2010 23:04:01 | 28.986 |
| 10/22/2010 01:49:01 | 26.2383 | 10/22/2010 23:24:01 | 28.986 |
| 10/22/2010 02:09:01 | 26.2383 | 10/22/2010 23:44:01 | 28.986 |
| 10/22/2010 02:29:01 | 26.2383 | 10/23/2010 00:04:01 | 28.986 |
| 10/22/2010 02:49:01 | 26.2383 | 10/23/2010 00:24:01 | 29.049 |
| 10/22/2010 03:09:01 | 26.2383 | 10/23/2010 00:44:01 | 29.049 |
| 10/22/2010 03:29:01 | 26.1753 | 10/23/2010 01:04:01 | 29.049 |
| 10/22/2010 03:49:01 | 26.1753 | 10/23/2010 01:24:01 | 29.049 |
| 10/22/2010 04:09:01 | 26.1753 | 10/23/2010 01:44:01 | 29.049 |
| 10/22/2010 04:29:01 | 26.1753 | 10/23/2010 02:04:01 | 29.049 |
| 10/22/2010 04:49:01 | 26.1753 | 10/23/2010 02:24:01 | 29.049 |
| 10/22/2010 05:09:01 | 26.1753 | 10/23/2010 02:44:01 | 29.049 |
| 10/22/2010 05:29:01 | 26.1133 | 10/23/2010 03:04:01 | 29.049 |
| 10/22/2010 05:49:01 | 26.1133 | 10/23/2010 03:24:01 | 29.049 |
| 10/22/2010 06:09:01 | 26.1133 | 10/23/2010 03:44:01 | 28.986 |
| 10/22/2010 06:29:01 | 26.1133 | 10/23/2010 04:04:01 | 28.986 |

|                     |         |                     |        |
|---------------------|---------|---------------------|--------|
| 10/22/2010 06:49:01 | 26.0503 | 10/23/2010 04:24:01 | 28.986 |
| 10/22/2010 07:09:01 | 26.0503 | 10/23/2010 04:44:01 | 28.986 |
| 10/22/2010 07:29:01 | 26.0503 | 10/23/2010 05:04:01 | 28.986 |
| 10/22/2010 07:49:01 | 25.9883 | 10/23/2010 05:24:01 | 28.986 |
| 10/22/2010 08:09:01 | 25.9883 | 10/23/2010 05:44:01 | 28.924 |
| 10/22/2010 08:29:01 | 25.9883 | 10/23/2010 06:04:01 | 28.924 |
| 10/22/2010 08:49:01 | 25.9253 | 10/23/2010 06:24:01 | 28.924 |
| 10/22/2010 09:09:01 | 25.9253 | 10/23/2010 06:44:01 | 28.924 |
| 10/22/2010 09:29:01 | 25.9253 | 10/23/2010 07:04:01 | 28.861 |
| 10/22/2010 09:49:01 | 25.9253 | 10/23/2010 07:24:01 | 28.861 |
| 10/22/2010 10:09:01 | 25.8633 | 10/23/2010 07:44:01 | 28.861 |
| 10/22/2010 10:29:01 | 25.8633 | 10/23/2010 08:04:01 | 28.799 |
| 10/22/2010 10:49:01 | 25.8633 | 10/23/2010 08:24:01 | 28.799 |
| 10/22/2010 11:09:01 | 25.8633 | 10/23/2010 08:44:01 | 28.799 |
| 10/22/2010 11:29:01 | 25.8003 | 10/23/2010 09:04:01 | 28.737 |
| 10/22/2010 11:49:01 | 25.8003 | 10/23/2010 09:24:01 | 28.737 |
| 10/22/2010 12:09:01 | 25.8003 | 10/23/2010 09:44:01 | 28.674 |
| 10/22/2010 12:29:01 | 25.8003 | 10/23/2010 10:04:01 | 28.674 |
| 10/22/2010 12:49:01 | 25.8003 | 10/23/2010 10:24:01 | 28.674 |
| 10/22/2010 13:09:01 | 25.8003 | 10/23/2010 10:44:01 | 28.612 |
| 10/22/2010 13:29:01 | 25.8003 | 10/23/2010 11:04:01 | 28.612 |
| 10/22/2010 13:49:01 | 25.8003 | 10/23/2010 11:24:01 | 28.612 |
| 10/22/2010 14:09:01 | 25.8633 | 10/23/2010 11:44:01 | 28.549 |
| 10/22/2010 14:29:01 | 25.8633 | 10/23/2010 12:04:01 | 28.549 |
| 10/22/2010 14:49:01 | 25.8633 | 10/23/2010 12:24:01 | 28.487 |
| 10/22/2010 15:09:01 | 25.8633 | 10/23/2010 12:44:01 | 28.487 |
| 10/22/2010 15:29:01 | 25.9253 | 10/23/2010 13:04:01 | 28.487 |
| 10/22/2010 15:49:01 | 25.9253 | 10/23/2010 13:24:01 | 28.424 |
| 10/22/2010 16:09:01 | 25.9253 | 10/23/2010 13:44:01 | 28.424 |
| 10/22/2010 16:29:01 | 25.9253 | 10/23/2010 14:04:01 | 28.424 |
| 10/22/2010 16:49:01 | 25.9883 | 10/23/2010 14:24:01 | 28.424 |
| 10/22/2010 17:09:01 | 25.9883 | 10/23/2010 14:44:01 | 28.424 |
| 10/22/2010 17:29:01 | 25.9883 | 10/23/2010 15:04:01 | 28.424 |
| 10/22/2010 17:49:01 | 26.0503 | 10/23/2010 15:24:01 | 28.424 |
| 10/22/2010 18:09:01 | 26.0503 | 10/23/2010 15:44:01 | 28.424 |
| 10/22/2010 18:29:01 | 26.0503 | 10/23/2010 16:04:01 | 28.424 |
| 10/22/2010 18:49:01 | 26.0503 | 10/23/2010 16:24:01 | 28.424 |
| 10/22/2010 19:09:01 | 26.1133 | 10/23/2010 16:44:01 | 28.424 |
| 10/22/2010 19:29:01 | 26.1133 | 10/23/2010 17:04:01 | 28.424 |
| 10/22/2010 19:49:01 | 26.1133 | 10/23/2010 17:24:01 | 28.424 |
| 10/22/2010 20:09:01 | 26.1133 | 10/23/2010 17:44:01 | 28.424 |
| 10/22/2010 20:29:01 | 26.1753 | 10/23/2010 18:04:01 | 28.424 |
| 10/22/2010 20:49:01 | 26.1753 | 10/23/2010 18:24:01 | 28.487 |
| 10/22/2010 21:09:01 | 26.1753 | 10/23/2010 18:44:01 | 28.487 |
| 10/22/2010 21:29:01 | 26.1753 | 10/23/2010 19:04:01 | 28.487 |
| 10/22/2010 21:49:01 | 26.1753 | 10/23/2010 19:24:01 | 28.487 |
| 10/22/2010 22:09:01 | 26.1753 | 10/23/2010 19:44:01 | 28.487 |
| 10/22/2010 22:29:01 | 26.1753 | 10/23/2010 20:04:01 | 28.549 |
| 10/22/2010 22:49:01 | 26.1753 | 10/23/2010 20:24:01 | 28.549 |
| 10/22/2010 23:09:01 | 26.1753 | 10/23/2010 20:44:01 | 28.549 |

|                     |         |                     |        |
|---------------------|---------|---------------------|--------|
| 10/22/2010 23:29:01 | 26.1753 | 10/23/2010 21:04:01 | 28.549 |
| 10/22/2010 23:49:01 | 26.1753 | 10/23/2010 21:24:01 | 28.549 |
| 10/23/2010 00:09:01 | 26.1753 | 10/23/2010 21:44:01 | 28.549 |
| 10/23/2010 00:29:01 | 26.1753 | 10/23/2010 22:04:01 | 28.549 |
| 10/23/2010 00:49:01 | 26.1753 | 10/23/2010 22:24:01 | 28.612 |
| 10/23/2010 01:09:01 | 26.1753 | 10/23/2010 22:44:01 | 28.612 |
| 10/23/2010 01:29:01 | 26.1133 | 10/23/2010 23:04:01 | 28.612 |
| 10/23/2010 01:49:01 | 26.1133 | 10/23/2010 23:24:01 | 28.612 |
| 10/23/2010 02:09:01 | 26.1133 | 10/23/2010 23:44:01 | 28.612 |
| 10/23/2010 02:29:01 | 26.1133 | 10/24/2010 00:04:01 | 28.612 |
| 10/23/2010 02:49:01 | 26.1133 | 10/24/2010 00:24:01 | 28.612 |
| 10/23/2010 03:09:01 | 26.1133 | 10/24/2010 00:44:01 | 28.612 |
| 10/23/2010 03:29:01 | 26.0503 | 10/24/2010 01:04:01 | 28.612 |
| 10/23/2010 03:49:01 | 26.0503 | 10/24/2010 01:24:01 | 28.612 |
| 10/23/2010 04:09:01 | 26.0503 | 10/24/2010 01:44:01 | 28.612 |
| 10/23/2010 04:29:01 | 26.0503 | 10/24/2010 02:04:01 | 28.612 |
| 10/23/2010 04:49:01 | 26.0503 | 10/24/2010 02:24:01 | 28.612 |
| 10/23/2010 05:09:01 | 25.9883 | 10/24/2010 02:44:01 | 28.612 |
| 10/23/2010 05:29:01 | 25.9883 | 10/24/2010 03:04:01 | 28.549 |
| 10/23/2010 05:49:01 | 25.9883 | 10/24/2010 03:24:01 | 28.549 |
| 10/23/2010 06:09:01 | 25.9883 | 10/24/2010 03:44:01 | 28.549 |
| 10/23/2010 06:29:01 | 25.9253 | 10/24/2010 04:04:01 | 28.549 |
| 10/23/2010 06:49:01 | 25.9253 | 10/24/2010 04:24:01 | 28.549 |
| 10/23/2010 07:09:01 | 25.9253 | 10/24/2010 04:44:01 | 28.549 |
| 10/23/2010 07:29:01 | 25.9253 | 10/24/2010 05:04:01 | 28.487 |
| 10/23/2010 07:49:01 | 25.8633 | 10/24/2010 05:24:01 | 28.487 |
| 10/23/2010 08:09:01 | 25.8633 | 10/24/2010 05:44:01 | 28.487 |
| 10/23/2010 08:29:01 | 25.8633 | 10/24/2010 06:04:01 | 28.487 |
| 10/23/2010 08:49:01 | 25.8003 | 10/24/2010 06:24:01 | 28.424 |
| 10/23/2010 09:09:01 | 25.8003 | 10/24/2010 06:44:01 | 28.424 |
| 10/23/2010 09:29:01 | 25.8003 | 10/24/2010 07:04:01 | 28.424 |
| 10/23/2010 09:49:01 | 25.8003 | 10/24/2010 07:24:01 | 28.424 |
| 10/23/2010 10:09:01 | 25.7383 | 10/24/2010 07:44:01 | 28.362 |
| 10/23/2010 10:29:01 | 25.7383 | 10/24/2010 08:04:01 | 28.362 |
| 10/23/2010 10:49:01 | 25.7383 | 10/24/2010 08:24:01 | 28.362 |
| 10/23/2010 11:09:01 | 25.7383 | 10/24/2010 08:44:01 | 28.362 |
| 10/23/2010 11:29:01 | 25.7383 | 10/24/2010 09:04:01 | 28.3   |
| 10/23/2010 11:49:01 | 25.7383 | 10/24/2010 09:24:01 | 28.3   |
| 10/23/2010 12:09:01 | 25.7383 | 10/24/2010 09:44:01 | 28.3   |
| 10/23/2010 12:29:01 | 25.7383 | 10/24/2010 10:04:01 | 28.237 |
| 10/23/2010 12:49:01 | 25.7383 | 10/24/2010 10:24:01 | 28.237 |
| 10/23/2010 13:09:01 | 25.7383 | 10/24/2010 10:44:01 | 28.237 |
| 10/23/2010 13:29:01 | 25.7383 | 10/24/2010 11:04:01 | 28.175 |
| 10/23/2010 13:49:01 | 25.7383 | 10/24/2010 11:24:01 | 28.175 |
| 10/23/2010 14:09:01 | 25.7383 | 10/24/2010 11:44:01 | 28.175 |
| 10/23/2010 14:29:01 | 25.7383 | 10/24/2010 12:04:01 | 28.112 |
| 10/23/2010 14:49:01 | 25.8003 | 10/24/2010 12:24:01 | 28.112 |
| 10/23/2010 15:09:01 | 25.8003 | 10/24/2010 12:44:01 | 28.112 |
| 10/23/2010 15:29:01 | 25.8003 | 10/24/2010 13:04:01 | 28.05  |
| 10/23/2010 15:49:01 | 25.8003 | 10/24/2010 13:24:01 | 28.05  |

|                     |         |                     |        |
|---------------------|---------|---------------------|--------|
| 10/23/2010 16:09:01 | 25.8633 | 10/24/2010 13:44:01 | 28.05  |
| 10/23/2010 16:29:01 | 25.8633 | 10/24/2010 14:04:01 | 28.05  |
| 10/23/2010 16:49:01 | 25.8633 | 10/24/2010 14:24:01 | 28.05  |
| 10/23/2010 17:09:01 | 25.9253 | 10/24/2010 14:44:01 | 28.05  |
| 10/23/2010 17:29:01 | 25.9253 | 10/24/2010 15:04:01 | 28.05  |
| 10/23/2010 17:49:01 | 25.9253 | 10/24/2010 15:24:01 | 28.05  |
| 10/23/2010 18:09:01 | 25.9253 | 10/24/2010 15:44:01 | 28.05  |
| 10/23/2010 18:29:01 | 25.9883 | 10/24/2010 16:04:01 | 28.05  |
| 10/23/2010 18:49:01 | 25.9883 | 10/24/2010 16:24:01 | 28.112 |
| 10/23/2010 19:09:01 | 25.9883 | 10/24/2010 16:44:01 | 28.112 |
| 10/23/2010 19:29:01 | 25.9883 | 10/24/2010 17:04:01 | 28.112 |
| 10/23/2010 19:49:01 | 25.9883 | 10/24/2010 17:24:01 | 28.175 |
| 10/23/2010 20:09:01 | 26.0503 | 10/24/2010 17:44:01 | 28.175 |
| 10/23/2010 20:29:01 | 26.0503 | 10/24/2010 18:04:01 | 28.175 |
| 10/23/2010 20:49:01 | 26.0503 | 10/24/2010 18:24:01 | 28.237 |
| 10/23/2010 21:09:01 | 26.0503 | 10/24/2010 18:44:01 | 28.237 |
| 10/23/2010 21:29:01 | 26.0503 | 10/24/2010 19:04:01 | 28.3   |
| 10/23/2010 21:49:01 | 26.0503 | 10/24/2010 19:24:01 | 28.3   |
| 10/23/2010 22:09:01 | 26.0503 | 10/24/2010 19:44:01 | 28.362 |
| 10/23/2010 22:29:01 | 26.0503 | 10/24/2010 20:04:01 | 28.362 |
| 10/23/2010 22:49:01 | 26.0503 | 10/24/2010 20:24:01 | 28.362 |
| 10/23/2010 23:09:01 | 26.0503 | 10/24/2010 20:44:01 | 28.424 |
| 10/23/2010 23:29:01 | 26.0503 | 10/24/2010 21:04:01 | 28.424 |
| 10/23/2010 23:49:01 | 26.0503 | 10/24/2010 21:24:01 | 28.487 |
| 10/24/2010 00:09:01 | 26.0503 | 10/24/2010 21:44:01 | 28.487 |
| 10/24/2010 00:29:01 | 26.0503 | 10/24/2010 22:04:01 | 28.487 |
| 10/24/2010 00:49:01 | 26.0503 | 10/24/2010 22:24:01 | 28.549 |
| 10/24/2010 01:09:01 | 25.9883 | 10/24/2010 22:44:01 | 28.549 |
| 10/24/2010 01:29:01 | 25.9883 | 10/24/2010 23:04:01 | 28.549 |
| 10/24/2010 01:49:01 | 25.9883 | 10/24/2010 23:24:01 | 28.549 |
| 10/24/2010 02:09:01 | 25.9883 | 10/24/2010 23:44:01 | 28.612 |
| 10/24/2010 02:29:01 | 25.9883 | 10/25/2010 00:04:01 | 28.612 |
| 10/24/2010 02:49:01 | 25.9883 | 10/25/2010 00:24:01 | 28.612 |
| 10/24/2010 03:09:01 | 25.9253 | 10/25/2010 00:44:01 | 28.612 |
| 10/24/2010 03:29:01 | 25.9253 | 10/25/2010 01:04:01 | 28.612 |
| 10/24/2010 03:49:01 | 25.9253 | 10/25/2010 01:24:01 | 28.612 |
| 10/24/2010 04:09:01 | 25.9253 | 10/25/2010 01:44:01 | 28.612 |
| 10/24/2010 04:29:01 | 25.9253 | 10/25/2010 02:04:01 | 28.674 |
| 10/24/2010 04:49:01 | 25.9253 | 10/25/2010 02:24:01 | 28.674 |
| 10/24/2010 05:09:01 | 25.8633 | 10/25/2010 02:44:01 | 28.674 |
| 10/24/2010 05:29:01 | 25.8633 | 10/25/2010 03:04:01 | 28.674 |
| 10/24/2010 05:49:01 | 25.8633 | 10/25/2010 03:24:01 | 28.674 |
| 10/24/2010 06:09:01 | 25.8633 | 10/25/2010 03:44:01 | 28.674 |
| 10/24/2010 06:29:01 | 25.8003 | 10/25/2010 04:04:01 | 28.674 |
| 10/24/2010 06:49:01 | 25.8003 | 10/25/2010 04:24:01 | 28.674 |
| 10/24/2010 07:09:01 | 25.8003 | 10/25/2010 04:44:01 | 28.674 |
| 10/24/2010 07:29:01 | 25.8003 | 10/25/2010 05:04:01 | 28.612 |
| 10/24/2010 07:49:01 | 25.7383 | 10/25/2010 05:24:01 | 28.612 |
| 10/24/2010 08:09:01 | 25.7383 | 10/25/2010 05:44:01 | 28.612 |
| 10/24/2010 08:29:01 | 25.7383 | 10/25/2010 06:04:01 | 28.612 |

|                     |         |                     |        |
|---------------------|---------|---------------------|--------|
| 10/24/2010 08:49:01 | 25.6753 | 10/25/2010 06:24:01 | 28.612 |
| 10/24/2010 09:09:01 | 25.6753 | 10/25/2010 06:44:01 | 28.612 |
| 10/24/2010 09:29:01 | 25.6753 | 10/25/2010 07:04:01 | 28.612 |
| 10/24/2010 09:49:01 | 25.6753 | 10/25/2010 07:24:01 | 28.549 |
| 10/24/2010 10:09:01 | 25.6133 | 10/25/2010 07:44:01 | 28.549 |
| 10/24/2010 10:29:01 | 25.6133 | 10/25/2010 08:04:01 | 28.549 |
| 10/24/2010 10:49:01 | 25.6133 | 10/25/2010 08:24:01 | 28.549 |
| 10/24/2010 11:09:01 | 25.6133 | 10/25/2010 08:44:01 | 28.487 |
| 10/24/2010 11:29:01 | 25.6133 | 10/25/2010 09:04:01 | 28.487 |
| 10/24/2010 11:49:01 | 25.6133 | 10/25/2010 09:24:01 | 28.487 |
| 10/24/2010 12:09:01 | 25.6133 | 10/25/2010 09:44:01 | 28.424 |
| 10/24/2010 12:29:01 | 25.6133 | 10/25/2010 10:04:01 | 28.424 |
| 10/24/2010 12:49:01 | 25.6133 | 10/25/2010 10:24:01 | 28.424 |
| 10/24/2010 13:09:01 | 25.6133 | 10/25/2010 10:44:01 | 28.362 |
| 10/24/2010 13:29:01 | 25.6133 | 10/25/2010 11:04:01 | 28.362 |
| 10/24/2010 13:49:01 | 25.6133 | 10/25/2010 11:24:01 | 28.362 |
| 10/24/2010 14:09:01 | 25.6753 | 10/25/2010 11:44:01 | 28.362 |
| 10/24/2010 14:29:01 | 25.6753 | 10/25/2010 12:04:01 | 28.3   |
| 10/24/2010 14:49:01 | 25.6753 | 10/25/2010 12:24:01 | 28.3   |
| 10/24/2010 15:09:01 | 25.7383 | 10/25/2010 12:44:01 | 28.3   |
| 10/24/2010 15:29:01 | 25.7383 | 10/25/2010 13:04:01 | 28.237 |
| 10/24/2010 15:49:01 | 25.7383 | 10/25/2010 13:24:01 | 28.237 |
| 10/24/2010 16:09:01 | 25.8003 | 10/25/2010 13:44:01 | 28.237 |
| 10/24/2010 16:29:01 | 25.8003 | 10/25/2010 14:04:01 | 28.237 |
| 10/24/2010 16:49:01 | 25.8003 | 10/25/2010 14:24:01 | 28.237 |
| 10/24/2010 17:09:01 | 25.8633 | 10/25/2010 14:44:01 | 28.237 |
| 10/24/2010 17:29:01 | 25.8633 | 10/25/2010 15:04:01 | 28.237 |
| 10/24/2010 17:49:01 | 25.9253 | 10/25/2010 15:24:01 | 28.237 |
| 10/24/2010 18:09:01 | 25.9253 | 10/25/2010 15:44:01 | 28.237 |
| 10/24/2010 18:29:01 | 25.9253 | 10/25/2010 16:04:01 | 28.237 |
| 10/24/2010 18:49:01 | 25.9253 | 10/25/2010 16:24:01 | 28.3   |
| 10/24/2010 19:09:01 | 25.9883 | 10/25/2010 16:44:01 | 28.3   |
| 10/24/2010 19:29:01 | 25.9883 | 10/25/2010 17:04:01 | 28.3   |
| 10/24/2010 19:49:01 | 25.9883 | 10/25/2010 17:24:01 | 28.362 |
| 10/24/2010 20:09:01 | 26.0503 | 10/25/2010 17:44:01 | 28.362 |
| 10/24/2010 20:29:01 | 26.0503 | 10/25/2010 18:04:01 | 28.362 |
| 10/24/2010 20:49:01 | 26.0503 | 10/25/2010 18:24:01 | 28.424 |
| 10/24/2010 21:09:01 | 26.0503 | 10/25/2010 18:44:01 | 28.424 |
| 10/24/2010 21:29:01 | 26.0503 | 10/25/2010 19:04:01 | 28.487 |
| 10/24/2010 21:49:01 | 26.0503 | 10/25/2010 19:24:01 | 28.487 |
| 10/24/2010 22:09:01 | 26.0503 | 10/25/2010 19:44:01 | 28.549 |
| 10/24/2010 22:29:01 | 26.0503 | 10/25/2010 20:04:01 | 28.549 |
| 10/24/2010 22:49:01 | 26.0503 | 10/25/2010 20:24:01 | 28.549 |
| 10/24/2010 23:09:01 | 26.1133 | 10/25/2010 20:44:01 | 28.612 |
| 10/24/2010 23:29:01 | 26.1133 | 10/25/2010 21:04:01 | 28.612 |
| 10/24/2010 23:49:01 | 26.0503 | 10/25/2010 21:24:01 | 28.674 |
| 10/25/2010 00:09:01 | 26.1133 | 10/25/2010 21:44:01 | 28.674 |
| 10/25/2010 00:29:01 | 26.0503 | 10/25/2010 22:04:01 | 28.674 |
| 10/25/2010 00:49:01 | 26.0503 | 10/25/2010 22:24:01 | 28.737 |
| 10/25/2010 01:09:01 | 26.0503 | 10/25/2010 22:44:01 | 28.737 |



|                     |         |                     |        |
|---------------------|---------|---------------------|--------|
| 10/25/2010 01:29:01 | 26.0503 | 10/25/2010 23:04:01 | 28.737 |
| 10/25/2010 01:49:01 | 26.0503 | 10/25/2010 23:24:01 | 28.799 |
| 10/25/2010 02:09:01 | 26.0503 | 10/25/2010 23:44:01 | 28.799 |
| 10/25/2010 02:29:01 | 26.0503 | 10/26/2010 00:04:01 | 28.799 |
| 10/25/2010 02:49:01 | 26.0503 | 10/26/2010 00:24:01 | 28.799 |
| 10/25/2010 03:09:01 | 26.0503 | 10/26/2010 00:44:01 | 28.799 |
| 10/25/2010 03:29:01 | 25.9883 | 10/26/2010 01:04:01 | 28.861 |
| 10/25/2010 03:49:01 | 25.9883 | 10/26/2010 01:24:01 | 28.861 |
| 10/25/2010 04:09:01 | 25.9883 | 10/26/2010 01:44:01 | 28.861 |
| 10/25/2010 04:29:01 | 25.9883 | 10/26/2010 02:04:01 | 28.861 |
| 10/25/2010 04:49:01 | 25.9883 | 10/26/2010 02:24:01 | 28.861 |
| 10/25/2010 05:09:01 | 25.9253 | 10/26/2010 02:44:01 | 28.861 |
| 10/25/2010 05:29:01 | 25.9253 | 10/26/2010 03:04:01 | 28.861 |
| 10/25/2010 05:49:01 | 25.9253 | 10/26/2010 03:24:01 | 28.861 |
| 10/25/2010 06:09:01 | 25.9253 | 10/26/2010 03:44:01 | 28.861 |
| 10/25/2010 06:29:01 | 25.8633 | 10/26/2010 04:04:01 | 28.861 |
| 10/25/2010 06:49:01 | 25.8633 | 10/26/2010 04:24:01 | 28.861 |
| 10/25/2010 07:09:01 | 25.8633 | 10/26/2010 04:44:01 | 28.861 |
| 10/25/2010 07:29:01 | 25.8633 | 10/26/2010 05:04:01 | 28.861 |
| 10/25/2010 07:49:01 | 25.8003 | 10/26/2010 05:24:01 | 28.799 |
| 10/25/2010 08:09:01 | 25.8003 | 10/26/2010 05:44:01 | 28.799 |
| 10/25/2010 08:29:01 | 25.7383 | 10/26/2010 06:04:01 | 28.799 |
| 10/25/2010 08:49:01 | 25.7383 | 10/26/2010 06:24:01 | 28.799 |
| 10/25/2010 09:09:01 | 25.7383 | 10/26/2010 06:44:01 | 28.799 |
| 10/25/2010 09:29:01 | 25.6753 | 10/26/2010 07:04:01 | 28.737 |
| 10/25/2010 09:49:01 | 25.6753 | 10/26/2010 07:24:01 | 28.737 |
| 10/25/2010 10:09:01 | 25.6753 | 10/26/2010 07:44:01 | 28.737 |
| 10/25/2010 10:29:01 | 25.6753 | 10/26/2010 08:04:01 | 28.737 |
| 10/25/2010 10:49:01 | 25.6753 | 10/26/2010 08:24:01 | 28.737 |
| 10/25/2010 11:09:01 | 25.6133 | 10/26/2010 08:44:01 | 28.674 |
| 10/25/2010 11:29:01 | 25.6133 | 10/26/2010 09:04:01 | 28.674 |
| 10/25/2010 11:49:01 | 25.6133 | 10/26/2010 09:24:01 | 28.674 |
| 10/25/2010 12:09:01 | 25.6133 | 10/26/2010 09:44:01 | 28.612 |
| 10/25/2010 12:29:01 | 25.6133 | 10/26/2010 10:04:01 | 28.612 |
| 10/25/2010 12:49:01 | 25.6133 | 10/26/2010 10:24:01 | 28.612 |
| 10/25/2010 13:09:01 | 25.6133 | 10/26/2010 10:44:01 | 28.549 |
| 10/25/2010 13:29:01 | 25.6133 | 10/26/2010 11:04:01 | 28.549 |
| 10/25/2010 13:49:01 | 25.6753 | 10/26/2010 11:24:01 | 28.549 |
| 10/25/2010 14:09:01 | 25.6753 | 10/26/2010 11:44:01 | 28.487 |
| 10/25/2010 14:29:01 | 25.6753 | 10/26/2010 12:04:01 | 28.487 |
| 10/25/2010 14:49:01 | 25.6753 | 10/26/2010 12:24:01 | 28.487 |
| 10/25/2010 15:09:01 | 25.7383 | 10/26/2010 12:44:01 | 28.487 |
| 10/25/2010 15:29:01 | 25.7383 | 10/26/2010 13:04:01 | 28.424 |
| 10/25/2010 15:49:01 | 25.7383 | 10/26/2010 13:24:01 | 28.424 |
| 10/25/2010 16:09:01 | 25.7383 | 10/26/2010 13:44:01 | 28.424 |
| 10/25/2010 16:29:01 | 25.8003 | 10/26/2010 14:04:01 | 28.424 |
| 10/25/2010 16:49:01 | 25.8003 | 10/26/2010 14:24:01 | 28.424 |
| 10/25/2010 17:09:01 | 25.8003 | 10/26/2010 14:44:01 | 28.424 |
| 10/25/2010 17:29:01 | 25.8633 | 10/26/2010 15:04:01 | 28.424 |
| 10/25/2010 17:49:01 | 25.8633 | 10/26/2010 15:24:01 | 28.424 |

|                     |         |                     |        |
|---------------------|---------|---------------------|--------|
| 10/25/2010 18:09:01 | 25.9253 | 10/26/2010 15:44:01 | 28.487 |
| 10/25/2010 18:29:01 | 25.9253 | 10/26/2010 16:04:01 | 28.487 |
| 10/25/2010 18:49:01 | 25.9253 | 10/26/2010 16:24:01 | 28.487 |
| 10/25/2010 19:09:01 | 25.9253 | 10/26/2010 16:44:01 | 28.487 |
| 10/25/2010 19:29:01 | 25.9883 | 10/26/2010 17:04:01 | 28.549 |
| 10/25/2010 19:49:01 | 25.9883 | 10/26/2010 17:24:01 | 28.549 |
| 10/25/2010 20:09:01 | 25.9883 | 10/26/2010 17:44:01 | 28.612 |
| 10/25/2010 20:29:01 | 25.9883 | 10/26/2010 18:04:01 | 28.612 |
| 10/25/2010 20:49:01 | 25.9883 | 10/26/2010 18:24:01 | 28.612 |
| 10/25/2010 21:09:01 | 26.0503 | 10/26/2010 18:44:01 | 28.674 |
| 10/25/2010 21:29:01 | 26.0503 | 10/26/2010 19:04:01 | 28.674 |
| 10/25/2010 21:49:01 | 26.0503 | 10/26/2010 19:24:01 | 28.737 |
| 10/25/2010 22:09:01 | 26.0503 | 10/26/2010 19:44:01 | 28.737 |
| 10/25/2010 22:29:01 | 26.0503 | 10/26/2010 20:04:01 | 28.799 |
| 10/25/2010 22:49:01 | 26.0503 | 10/26/2010 20:24:01 | 28.799 |
| 10/25/2010 23:09:01 | 26.0503 | 10/26/2010 20:44:01 | 28.861 |
| 10/25/2010 23:29:01 | 26.0503 | 10/26/2010 21:04:01 | 28.861 |
| 10/25/2010 23:49:01 | 26.0503 | 10/26/2010 21:24:01 | 28.924 |
| 10/26/2010 00:09:01 | 26.0503 | 10/26/2010 21:44:01 | 28.924 |
| 10/26/2010 00:29:01 | 26.0503 | 10/26/2010 22:04:01 | 28.924 |
| 10/26/2010 00:49:01 | 25.9883 | 10/26/2010 22:24:01 | 28.986 |
| 10/26/2010 01:09:01 | 25.9883 | 10/26/2010 22:44:01 | 28.986 |
| 10/26/2010 01:29:01 | 25.9883 | 10/26/2010 23:04:01 | 28.986 |
| 10/26/2010 01:49:01 | 25.9883 | 10/26/2010 23:24:01 | 28.986 |
| 10/26/2010 02:09:01 | 25.9883 | 10/26/2010 23:44:01 | 29.049 |
| 10/26/2010 02:29:01 | 25.9883 | 10/27/2010 00:04:01 | 29.049 |
| 10/26/2010 02:49:01 | 25.9883 | 10/27/2010 00:24:01 | 29.049 |
| 10/26/2010 03:09:01 | 25.9253 | 10/27/2010 00:44:01 | 29.049 |
| 10/26/2010 03:29:01 | 25.9253 | 10/27/2010 01:04:01 | 29.111 |
| 10/26/2010 03:49:01 | 25.9253 | 10/27/2010 01:24:01 | 29.111 |
| 10/26/2010 04:09:01 | 25.9253 | 10/27/2010 01:44:01 | 29.111 |
| 10/26/2010 04:29:01 | 25.9253 | 10/27/2010 02:04:01 | 29.111 |
| 10/26/2010 04:49:01 | 25.8633 | 10/27/2010 02:24:01 | 29.111 |
| 10/26/2010 05:09:01 | 25.8633 | 10/27/2010 02:44:01 | 29.111 |
| 10/26/2010 05:29:01 | 25.8633 | 10/27/2010 03:04:01 | 29.111 |
| 10/26/2010 05:49:01 | 25.8633 | 10/27/2010 03:24:01 | 29.111 |
| 10/26/2010 06:09:01 | 25.8003 | 10/27/2010 03:44:01 | 29.111 |
| 10/26/2010 06:29:01 | 25.8003 | 10/27/2010 04:04:01 | 29.111 |
| 10/26/2010 06:49:01 | 25.8003 | 10/27/2010 04:24:01 | 29.111 |
| 10/26/2010 07:09:01 | 25.8003 | 10/27/2010 04:44:01 | 29.111 |
| 10/26/2010 07:29:01 | 25.7383 | 10/27/2010 05:04:01 | 29.111 |
| 10/26/2010 07:49:01 | 25.7383 | 10/27/2010 05:24:01 | 29.049 |
| 10/26/2010 08:09:01 | 25.7383 | 10/27/2010 05:44:01 | 29.111 |
| 10/26/2010 08:29:01 | 25.6753 | 10/27/2010 06:04:01 | 29.049 |
| 10/26/2010 08:49:01 | 25.6753 | 10/27/2010 06:24:01 | 29.049 |
| 10/26/2010 09:09:01 | 25.6753 | 10/27/2010 06:44:01 | 29.049 |
| 10/26/2010 09:29:01 | 25.6753 | 10/27/2010 07:04:01 | 29.049 |
| 10/26/2010 09:49:01 | 25.6133 | 10/27/2010 07:24:01 | 28.986 |
| 10/26/2010 10:09:01 | 25.6133 | 10/27/2010 07:44:01 | 28.986 |
| 10/26/2010 10:29:01 | 25.6133 | 10/27/2010 08:04:01 | 28.986 |

|                     |         |                     |        |
|---------------------|---------|---------------------|--------|
| 10/26/2010 10:49:01 | 25.6133 | 10/27/2010 08:24:01 | 28.986 |
| 10/26/2010 11:09:01 | 25.6133 | 10/27/2010 08:44:01 | 28.986 |
| 10/26/2010 11:29:01 | 25.6133 | 10/27/2010 09:04:01 | 28.924 |
| 10/26/2010 11:49:01 | 25.6133 | 10/27/2010 09:24:01 | 28.924 |
| 10/26/2010 12:09:01 | 25.6133 | 10/27/2010 09:44:01 | 28.924 |
| 10/26/2010 12:29:01 | 25.6133 | 10/27/2010 10:04:01 | 28.861 |
| 10/26/2010 12:49:01 | 25.6133 | 10/27/2010 10:24:01 | 28.861 |
| 10/26/2010 13:09:01 | 25.6133 | 10/27/2010 10:44:01 | 28.861 |
| 10/26/2010 13:29:01 | 25.6753 | 10/27/2010 11:04:01 | 28.799 |
| 10/26/2010 13:49:01 | 25.6753 | 10/27/2010 11:24:01 | 28.799 |
| 10/26/2010 14:09:01 | 25.6753 | 10/27/2010 11:44:01 | 28.799 |
| 10/26/2010 14:29:01 | 25.6753 | 10/27/2010 12:04:01 | 28.799 |
| 10/26/2010 14:49:01 | 25.7383 | 10/27/2010 12:24:01 | 28.737 |
| 10/26/2010 15:09:01 | 25.7383 | 10/27/2010 12:44:01 | 28.737 |
| 10/26/2010 15:29:01 | 25.7383 | 10/27/2010 13:04:01 | 28.737 |
| 10/26/2010 15:49:01 | 25.8003 | 10/27/2010 13:24:01 | 28.737 |
| 10/26/2010 16:09:01 | 25.8003 | 10/27/2010 13:44:01 | 28.737 |
| 10/26/2010 16:29:01 | 25.8633 | 10/27/2010 14:04:01 | 28.674 |
| 10/26/2010 16:49:01 | 25.8633 | 10/27/2010 14:24:01 | 28.737 |
| 10/26/2010 17:09:01 | 25.9253 | 10/27/2010 14:44:01 | 28.674 |
| 10/26/2010 17:29:01 | 25.9253 | 10/27/2010 15:04:01 | 28.737 |
| 10/26/2010 17:49:01 | 25.9253 | 10/27/2010 15:24:01 | 28.737 |
| 10/26/2010 18:09:01 | 25.9883 | 10/27/2010 15:44:01 | 28.737 |
| 10/26/2010 18:29:01 | 25.9883 | 10/27/2010 16:04:01 | 28.737 |
| 10/26/2010 18:49:01 | 26.0503 | 10/27/2010 16:24:01 | 28.799 |
| 10/26/2010 19:09:01 | 26.0503 | 10/27/2010 16:44:01 | 28.799 |
| 10/26/2010 19:29:01 | 26.0503 | 10/27/2010 17:04:01 | 28.799 |
| 10/26/2010 19:49:01 | 26.1133 | 10/27/2010 17:24:01 | 28.861 |
| 10/26/2010 20:09:01 | 26.1133 | 10/27/2010 17:44:01 | 28.861 |
| 10/26/2010 20:29:01 | 26.1133 | 10/27/2010 18:04:01 | 28.861 |
| 10/26/2010 20:49:01 | 26.1133 | 10/27/2010 18:24:01 | 28.924 |
| 10/26/2010 21:09:01 | 26.1133 | 10/27/2010 18:44:01 | 28.924 |
| 10/26/2010 21:29:01 | 26.1753 | 10/27/2010 19:04:01 | 28.986 |
| 10/26/2010 21:49:01 | 26.1753 | 10/27/2010 19:24:01 | 28.986 |
| 10/26/2010 22:09:01 | 26.1753 | 10/27/2010 19:44:01 | 28.986 |
| 10/26/2010 22:29:01 | 26.1753 | 10/27/2010 20:04:01 | 29.049 |
| 10/26/2010 22:49:01 | 26.1753 | 10/27/2010 20:24:01 | 29.049 |
| 10/26/2010 23:09:01 | 26.1753 | 10/27/2010 20:44:01 | 29.111 |
| 10/26/2010 23:29:01 | 26.1753 | 10/27/2010 21:04:01 | 29.111 |
| 10/26/2010 23:49:01 | 26.1753 | 10/27/2010 21:24:01 | 29.111 |
| 10/27/2010 00:09:01 | 26.1753 | 10/27/2010 21:44:01 | 29.174 |
| 10/27/2010 00:29:01 | 26.1753 | 10/27/2010 22:04:01 | 29.174 |
| 10/27/2010 00:49:01 | 26.1753 | 10/27/2010 22:24:01 | 29.236 |
| 10/27/2010 01:09:01 | 26.1753 | 10/27/2010 22:44:01 | 29.236 |
| 10/27/2010 01:29:01 | 26.1753 | 10/27/2010 23:04:01 | 29.236 |
| 10/27/2010 01:49:01 | 26.1753 | 10/27/2010 23:24:01 | 29.236 |
| 10/27/2010 02:09:01 | 26.1133 | 10/27/2010 23:44:01 | 29.298 |
| 10/27/2010 02:29:01 | 26.1133 | 10/28/2010 00:04:01 | 29.298 |
| 10/27/2010 02:49:01 | 26.1133 | 10/28/2010 00:24:01 | 29.298 |
| 10/27/2010 03:09:01 | 26.1133 | 10/28/2010 00:44:01 | 29.298 |

|                     |         |                     |        |
|---------------------|---------|---------------------|--------|
| 10/27/2010 03:29:01 | 26.1133 | 10/28/2010 01:04:01 | 29.298 |
| 10/27/2010 03:49:01 | 26.1133 | 10/28/2010 01:24:01 | 29.298 |
| 10/27/2010 04:09:01 | 26.1133 | 10/28/2010 01:44:01 | 29.298 |
| 10/27/2010 04:29:01 | 26.0503 | 10/28/2010 02:04:01 | 29.361 |
| 10/27/2010 04:49:01 | 26.0503 | 10/28/2010 02:24:01 | 29.361 |
| 10/27/2010 05:09:01 | 26.0503 | 10/28/2010 02:44:01 | 29.361 |
| 10/27/2010 05:29:01 | 26.0503 | 10/28/2010 03:04:01 | 29.361 |
| 10/27/2010 05:49:01 | 26.0503 | 10/28/2010 03:24:01 | 29.361 |
| 10/27/2010 06:09:01 | 25.9883 | 10/28/2010 03:44:01 | 29.361 |
| 10/27/2010 06:29:01 | 25.9883 | 10/28/2010 04:04:01 | 29.361 |
| 10/27/2010 06:49:01 | 25.9883 | 10/28/2010 04:24:01 | 29.361 |
| 10/27/2010 07:09:01 | 25.9883 | 10/28/2010 04:44:01 | 29.298 |
| 10/27/2010 07:29:01 | 25.9253 | 10/28/2010 05:04:01 | 29.298 |
| 10/27/2010 07:49:01 | 25.9253 | 10/28/2010 05:24:01 | 29.298 |
| 10/27/2010 08:09:01 | 25.9253 | 10/28/2010 05:44:01 | 29.298 |
| 10/27/2010 08:29:01 | 25.9253 | 10/28/2010 06:04:01 | 29.298 |
| 10/27/2010 08:49:01 | 25.8633 | 10/28/2010 06:24:01 | 29.298 |
| 10/27/2010 09:09:01 | 25.8633 | 10/28/2010 06:44:01 | 29.298 |
| 10/27/2010 09:29:01 | 25.8633 | 10/28/2010 07:04:01 | 29.298 |
| 10/27/2010 09:49:01 | 25.8633 | 10/28/2010 07:24:01 | 29.236 |
| 10/27/2010 10:09:01 | 25.8003 | 10/28/2010 07:44:01 | 29.236 |
| 10/27/2010 10:29:01 | 25.8003 | 10/28/2010 08:04:01 | 29.236 |
| 10/27/2010 10:49:01 | 25.8003 | 10/28/2010 08:24:01 | 29.236 |
| 10/27/2010 11:09:01 | 25.8003 | 10/28/2010 08:44:01 | 29.236 |
| 10/27/2010 11:29:01 | 25.8003 | 10/28/2010 09:04:01 | 29.174 |
| 10/27/2010 11:49:01 | 25.8003 | 10/28/2010 09:24:01 | 29.174 |
| 10/27/2010 12:09:01 | 25.8003 | 10/28/2010 09:44:01 | 29.174 |
| 10/27/2010 12:29:01 | 25.8003 | 10/28/2010 10:04:01 | 29.174 |
| 10/27/2010 12:49:01 | 25.8633 | 10/28/2010 10:24:01 | 29.174 |
| 10/27/2010 13:09:01 | 25.8633 | 10/28/2010 10:44:01 | 29.111 |
| 10/27/2010 13:29:01 | 25.8633 | 10/28/2010 11:04:01 | 29.111 |
| 10/27/2010 13:49:01 | 25.8633 | 10/28/2010 11:24:01 | 29.111 |
| 10/27/2010 14:09:01 | 25.9253 | 10/28/2010 11:44:01 | 29.111 |
| 10/27/2010 14:29:01 | 25.9253 | 10/28/2010 12:04:01 | 29.049 |
| 10/27/2010 14:49:01 | 25.9253 | 10/28/2010 12:24:01 | 29.049 |
| 10/27/2010 15:09:01 | 25.9883 | 10/28/2010 12:44:01 | 29.049 |
| 10/27/2010 15:29:01 | 25.9883 | 10/28/2010 13:04:01 | 29.049 |
| 10/27/2010 15:49:01 | 26.0503 | 10/28/2010 13:24:01 | 29.049 |
| 10/27/2010 16:09:01 | 26.0503 | 10/28/2010 13:44:01 | 29.049 |
| 10/27/2010 16:29:01 | 26.0503 | 10/28/2010 14:04:01 | 28.986 |
| 10/27/2010 16:49:01 | 26.1133 | 10/28/2010 14:24:01 | 28.986 |
| 10/27/2010 17:09:01 | 26.1133 | 10/28/2010 14:44:01 | 28.986 |
| 10/27/2010 17:29:01 | 26.1753 | 10/28/2010 15:04:01 | 28.986 |
| 10/27/2010 17:49:01 | 26.1753 | 10/28/2010 15:24:01 | 28.986 |
| 10/27/2010 18:09:01 | 26.1753 | 10/28/2010 15:44:01 | 28.986 |
| 10/27/2010 18:29:01 | 26.2383 | 10/28/2010 16:04:01 | 28.986 |
| 10/27/2010 18:49:01 | 26.2383 | 10/28/2010 16:24:01 | 29.049 |
| 10/27/2010 19:09:01 | 26.2383 | 10/28/2010 16:44:01 | 29.049 |
| 10/27/2010 19:29:01 | 26.3003 | 10/28/2010 17:04:01 | 29.049 |
| 10/27/2010 19:49:01 | 26.3003 | 10/28/2010 17:24:01 | 29.049 |

|                     |         |                     |        |
|---------------------|---------|---------------------|--------|
| 10/27/2010 20:09:01 | 26.3003 | 10/28/2010 17:44:01 | 29.049 |
| 10/27/2010 20:29:01 | 26.3633 | 10/28/2010 18:04:01 | 29.049 |
| 10/27/2010 20:49:01 | 26.3633 | 10/28/2010 18:24:01 | 29.049 |
| 10/27/2010 21:09:01 | 26.3633 | 10/28/2010 18:44:01 | 29.111 |
| 10/27/2010 21:29:01 | 26.3633 | 10/28/2010 19:04:01 | 29.111 |
| 10/27/2010 21:49:01 | 26.3633 | 10/28/2010 19:24:01 | 29.111 |
| 10/27/2010 22:09:01 | 26.3633 | 10/28/2010 19:44:01 | 29.174 |
| 10/27/2010 22:29:01 | 26.4253 | 10/28/2010 20:04:01 | 29.174 |
| 10/27/2010 22:49:01 | 26.4253 | 10/28/2010 20:24:01 | 29.174 |
| 10/27/2010 23:09:01 | 26.4253 | 10/28/2010 20:44:01 | 29.174 |
| 10/27/2010 23:29:01 | 26.4253 | 10/28/2010 21:04:01 | 29.174 |
| 10/27/2010 23:49:01 | 26.4253 | 10/28/2010 21:24:01 | 29.236 |
| 10/28/2010 00:09:01 | 26.4253 | 10/28/2010 21:44:01 | 29.236 |
| 10/28/2010 00:29:01 | 26.4253 | 10/28/2010 22:04:01 | 29.236 |
| 10/28/2010 00:49:01 | 26.4253 | 10/28/2010 22:24:01 | 29.236 |
| 10/28/2010 01:09:01 | 26.4253 | 10/28/2010 22:44:01 | 29.298 |
| 10/28/2010 01:29:01 | 26.3633 | 10/28/2010 23:04:01 | 29.298 |
| 10/28/2010 01:49:01 | 26.3633 | 10/28/2010 23:24:01 | 29.298 |
| 10/28/2010 02:09:01 | 26.3633 | 10/28/2010 23:44:01 | 29.298 |
| 10/28/2010 02:29:01 | 26.3633 | 10/29/2010 00:04:01 | 29.298 |
| 10/28/2010 02:49:01 | 26.3633 | 10/29/2010 00:24:01 | 29.298 |
| 10/28/2010 03:09:01 | 26.3633 | 10/29/2010 00:44:01 | 29.298 |
| 10/28/2010 03:29:01 | 26.3633 | 10/29/2010 01:04:01 | 29.298 |
| 10/28/2010 03:49:01 | 26.3633 | 10/29/2010 01:24:01 | 29.298 |
| 10/28/2010 04:09:01 | 26.3633 | 10/29/2010 01:44:01 | 29.298 |
| 10/28/2010 04:29:01 | 26.3633 | 10/29/2010 02:04:01 | 29.361 |
| 10/28/2010 04:49:01 | 26.3003 | 10/29/2010 02:24:01 | 29.361 |
| 10/28/2010 05:09:01 | 26.3003 | 10/29/2010 02:44:01 | 29.298 |
| 10/28/2010 05:29:01 | 26.3003 | 10/29/2010 03:04:01 | 29.298 |
| 10/28/2010 05:49:01 | 26.3003 | 10/29/2010 03:24:01 | 29.298 |
| 10/28/2010 06:09:01 | 26.3003 | 10/29/2010 03:44:01 | 29.298 |
| 10/28/2010 06:29:01 | 26.3003 | 10/29/2010 04:04:01 | 29.298 |
| 10/28/2010 06:49:01 | 26.3003 | 10/29/2010 04:24:01 | 29.298 |
| 10/28/2010 07:09:01 | 26.3003 | 10/29/2010 04:44:01 | 29.298 |
| 10/28/2010 07:29:01 | 26.2383 | 10/29/2010 05:04:01 | 29.298 |
| 10/28/2010 07:49:01 | 26.2383 | 10/29/2010 05:24:01 | 29.298 |
| 10/28/2010 08:09:01 | 26.2383 | 10/29/2010 05:44:01 | 29.298 |
| 10/28/2010 08:29:01 | 26.2383 | 10/29/2010 06:04:01 | 29.298 |
| 10/28/2010 08:49:01 | 26.2383 | 10/29/2010 06:24:01 | 29.236 |
| 10/28/2010 09:09:01 | 26.2383 | 10/29/2010 06:44:01 | 29.236 |
| 10/28/2010 09:29:01 | 26.2383 | 10/29/2010 07:04:01 | 29.236 |
| 10/28/2010 09:49:01 | 26.2383 | 10/29/2010 07:24:01 | 29.236 |
| 10/28/2010 10:09:01 | 26.1753 | 10/29/2010 07:44:01 | 29.174 |
| 10/28/2010 10:29:01 | 26.1753 | 10/29/2010 08:04:01 | 29.174 |
| 10/28/2010 10:49:01 | 26.1753 | 10/29/2010 08:24:01 | 29.174 |
| 10/28/2010 11:09:01 | 26.1753 | 10/29/2010 08:44:01 | 29.174 |
| 10/28/2010 11:29:01 | 26.1753 | 10/29/2010 09:04:01 | 29.111 |
| 10/28/2010 11:49:01 | 26.1753 | 10/29/2010 09:24:01 | 29.111 |
| 10/28/2010 12:09:01 | 26.2383 | 10/29/2010 09:44:01 | 29.111 |
| 10/28/2010 12:29:01 | 26.2383 | 10/29/2010 10:04:01 | 29.111 |

|                     |         |                     |        |
|---------------------|---------|---------------------|--------|
| 10/28/2010 12:49:01 | 26.2383 | 10/29/2010 10:24:01 | 29.049 |
| 10/28/2010 13:09:01 | 26.2383 | 10/29/2010 10:44:01 | 29.049 |
| 10/28/2010 13:29:01 | 26.2383 | 10/29/2010 11:04:01 | 29.049 |
| 10/28/2010 13:49:01 | 26.2383 | 10/29/2010 11:24:01 | 29.049 |
| 10/28/2010 14:09:01 | 26.3003 | 10/29/2010 11:44:01 | 28.986 |
| 10/28/2010 14:29:01 | 26.3003 | 10/29/2010 12:04:01 | 28.986 |
| 10/28/2010 14:49:01 | 26.3003 | 10/29/2010 12:24:01 | 28.986 |
| 10/28/2010 15:09:01 | 26.3633 | 10/29/2010 12:44:01 | 28.986 |
| 10/28/2010 15:29:01 | 26.3633 | 10/29/2010 13:04:01 | 28.986 |
| 10/28/2010 15:49:01 | 26.3633 | 10/29/2010 13:24:01 | 28.924 |
| 10/28/2010 16:09:01 | 26.4253 | 10/29/2010 13:44:01 | 28.924 |
| 10/28/2010 16:29:01 | 26.4253 | 10/29/2010 14:04:01 | 28.924 |
| 10/28/2010 16:49:01 | 26.4253 | 10/29/2010 14:24:01 | 28.924 |
| 10/28/2010 17:09:01 | 26.4883 | 10/29/2010 14:44:01 | 28.924 |
| 10/28/2010 17:29:01 | 26.4883 | 10/29/2010 15:04:01 | 28.924 |
| 10/28/2010 17:49:01 | 26.5503 | 10/29/2010 15:24:01 | 28.924 |
| 10/28/2010 18:09:01 | 26.5503 | 10/29/2010 15:44:01 | 28.924 |
| 10/28/2010 18:29:01 | 26.5503 | 10/29/2010 16:04:01 | 28.986 |
| 10/28/2010 18:49:01 | 26.6133 | 10/29/2010 16:24:01 | 28.986 |
| 10/28/2010 19:09:01 | 26.6133 | 10/29/2010 16:44:01 | 28.986 |
| 10/28/2010 19:29:01 | 26.6133 | 10/29/2010 17:04:01 | 29.049 |
| 10/28/2010 19:49:01 | 26.6753 | 10/29/2010 17:24:01 | 29.049 |
| 10/28/2010 20:09:01 | 26.6753 | 10/29/2010 17:44:01 | 29.049 |
| 10/28/2010 20:29:01 | 26.6753 | 10/29/2010 18:04:01 | 29.111 |
| 10/28/2010 20:49:01 | 26.6753 | 10/29/2010 18:24:01 | 29.111 |
| 10/28/2010 21:09:01 | 26.6753 | 10/29/2010 18:44:01 | 29.174 |
| 10/28/2010 21:29:01 | 26.7383 | 10/29/2010 19:04:01 | 29.174 |
| 10/28/2010 21:49:01 | 26.7383 | 10/29/2010 19:24:01 | 29.174 |
| 10/28/2010 22:09:01 | 26.7383 | 10/29/2010 19:44:01 | 29.236 |
| 10/28/2010 22:29:01 | 26.7383 | 10/29/2010 20:04:01 | 29.236 |
| 10/28/2010 22:49:01 | 26.7383 | 10/29/2010 20:24:01 | 29.298 |
| 10/28/2010 23:09:01 | 26.7383 | 10/29/2010 20:44:01 | 29.298 |
| 10/28/2010 23:29:01 | 26.7383 | 10/29/2010 21:04:01 | 29.361 |
| 10/28/2010 23:49:01 | 26.7383 | 10/29/2010 21:24:01 | 29.361 |
| 10/29/2010 00:09:01 | 26.7383 | 10/29/2010 21:44:01 | 29.361 |
| 10/29/2010 00:29:01 | 26.6753 | 10/29/2010 22:04:01 | 29.423 |
| 10/29/2010 00:49:01 | 26.7383 | 10/29/2010 22:24:01 | 29.423 |
| 10/29/2010 01:09:01 | 26.6753 | 10/29/2010 22:44:01 | 29.423 |
| 10/29/2010 01:29:01 | 26.6753 | 10/29/2010 23:04:01 | 29.486 |
| 10/29/2010 01:49:01 | 26.6753 | 10/29/2010 23:24:01 | 29.486 |
| 10/29/2010 02:09:01 | 26.6753 | 10/29/2010 23:44:01 | 29.486 |
| 10/29/2010 02:29:01 | 26.6753 | 10/30/2010 00:04:01 | 29.548 |
| 10/29/2010 02:49:01 | 26.6753 | 10/30/2010 00:24:01 | 29.548 |
| 10/29/2010 03:09:01 | 26.6753 | 10/30/2010 00:44:01 | 29.548 |
| 10/29/2010 03:29:01 | 26.6753 | 10/30/2010 01:04:01 | 29.548 |
| 10/29/2010 03:49:01 | 26.6133 | 10/30/2010 01:24:01 | 29.548 |
| 10/29/2010 04:09:01 | 26.6133 | 10/30/2010 01:44:01 | 29.548 |
| 10/29/2010 04:29:01 | 26.6133 | 10/30/2010 02:04:01 | 29.61  |
| 10/29/2010 04:49:01 | 26.6133 | 10/30/2010 02:24:01 | 29.61  |
| 10/29/2010 05:09:01 | 26.6133 | 10/30/2010 02:44:01 | 29.61  |

|                     |         |                     |        |
|---------------------|---------|---------------------|--------|
| 10/29/2010 05:29:01 | 26.6133 | 10/30/2010 03:04:01 | 29.61  |
| 10/29/2010 05:49:01 | 26.5503 | 10/30/2010 03:24:01 | 29.61  |
| 10/29/2010 06:09:01 | 26.5503 | 10/30/2010 03:44:01 | 29.61  |
| 10/29/2010 06:29:01 | 26.5503 | 10/30/2010 04:04:01 | 29.61  |
| 10/29/2010 06:49:01 | 26.4883 | 10/30/2010 04:24:01 | 29.61  |
| 10/29/2010 07:09:01 | 26.4883 | 10/30/2010 04:44:01 | 29.61  |
| 10/29/2010 07:29:01 | 26.4883 | 10/30/2010 05:04:01 | 29.548 |
| 10/29/2010 07:49:01 | 26.4883 | 10/30/2010 05:24:01 | 29.548 |
| 10/29/2010 08:09:01 | 26.4883 | 10/30/2010 05:44:01 | 29.548 |
| 10/29/2010 08:29:01 | 26.4253 | 10/30/2010 06:04:01 | 29.548 |
| 10/29/2010 08:49:01 | 26.4253 | 10/30/2010 06:24:01 | 29.548 |
| 10/29/2010 09:09:01 | 26.4253 | 10/30/2010 06:44:01 | 29.548 |
| 10/29/2010 09:29:01 | 26.4253 | 10/30/2010 07:04:01 | 29.548 |
| 10/29/2010 09:49:01 | 26.4253 | 10/30/2010 07:24:01 | 29.486 |
| 10/29/2010 10:09:01 | 26.3633 | 10/30/2010 07:44:01 | 29.486 |
| 10/29/2010 10:29:01 | 26.3633 | 10/30/2010 08:04:01 | 29.486 |
| 10/29/2010 10:49:01 | 26.3633 | 10/30/2010 08:24:01 | 29.486 |
| 10/29/2010 11:09:01 | 26.3633 | 10/30/2010 08:44:01 | 29.423 |
| 10/29/2010 11:29:01 | 26.3633 | 10/30/2010 09:04:01 | 29.423 |
| 10/29/2010 11:49:01 | 26.3633 | 10/30/2010 09:24:01 | 29.423 |
| 10/29/2010 12:09:01 | 26.3633 | 10/30/2010 09:44:01 | 29.423 |
| 10/29/2010 12:29:01 | 26.4253 | 10/30/2010 10:04:01 | 29.361 |
| 10/29/2010 12:49:01 | 26.4253 | 10/30/2010 10:24:01 | 29.361 |
| 10/29/2010 13:09:01 | 26.4253 | 10/30/2010 10:44:01 | 29.361 |
| 10/29/2010 13:29:01 | 26.4253 | 10/30/2010 11:04:01 | 29.361 |
| 10/29/2010 13:49:01 | 26.4253 | 10/30/2010 11:24:01 | 29.298 |
| 10/29/2010 14:09:01 | 26.4883 | 10/30/2010 11:44:01 | 29.298 |
| 10/29/2010 14:29:01 | 26.4883 | 10/30/2010 12:04:01 | 29.298 |
| 10/29/2010 14:49:01 | 26.4883 | 10/30/2010 12:24:01 | 29.298 |
| 10/29/2010 15:09:01 | 26.5503 | 10/30/2010 12:44:01 | 29.236 |
| 10/29/2010 15:29:01 | 26.5503 | 10/30/2010 13:04:01 | 29.236 |
| 10/29/2010 15:49:01 | 26.5503 | 10/30/2010 13:24:01 | 29.236 |
| 10/29/2010 16:09:01 | 26.6133 | 10/30/2010 13:44:01 | 29.236 |
| 10/29/2010 16:29:01 | 26.6133 | 10/30/2010 14:04:01 | 29.236 |
| 10/29/2010 16:49:01 | 26.6753 | 10/30/2010 14:24:01 | 29.236 |
| 10/29/2010 17:09:01 | 26.6753 | 10/30/2010 14:44:01 | 29.236 |
| 10/29/2010 17:29:01 | 26.7383 | 10/30/2010 15:04:01 | 29.236 |
| 10/29/2010 17:49:01 | 26.7383 | 10/30/2010 15:24:01 | 29.236 |
| 10/29/2010 18:09:01 | 26.7383 | 10/30/2010 15:44:01 | 29.236 |
| 10/29/2010 18:29:01 | 26.8003 | 10/30/2010 16:04:01 | 29.236 |
| 10/29/2010 18:49:01 | 26.8003 | 10/30/2010 16:24:01 | 29.236 |
| 10/29/2010 19:09:01 | 26.8003 | 10/30/2010 16:44:01 | 29.236 |
| 10/29/2010 19:29:01 | 26.8623 | 10/30/2010 17:04:01 | 29.236 |
| 10/29/2010 19:49:01 | 26.8623 | 10/30/2010 17:24:01 | 29.298 |
| 10/29/2010 20:09:01 | 26.9253 | 10/30/2010 17:44:01 | 29.298 |
| 10/29/2010 20:29:01 | 26.9253 | 10/30/2010 18:04:01 | 29.298 |
| 10/29/2010 20:49:01 | 26.9253 | 10/30/2010 18:24:01 | 29.361 |
| 10/29/2010 21:09:01 | 26.9253 | 10/30/2010 18:44:01 | 29.361 |
| 10/29/2010 21:29:01 | 26.9253 | 10/30/2010 19:04:01 | 29.361 |
| 10/29/2010 21:49:01 | 26.9253 | 10/30/2010 19:24:01 | 29.361 |

|                     |         |                     |        |
|---------------------|---------|---------------------|--------|
| 10/29/2010 22:09:01 | 26.9873 | 10/30/2010 19:44:01 | 29.423 |
| 10/29/2010 22:29:01 | 26.9873 | 10/30/2010 20:04:01 | 29.423 |
| 10/29/2010 22:49:01 | 26.9873 | 10/30/2010 20:24:01 | 29.423 |
| 10/29/2010 23:09:01 | 26.9873 | 10/30/2010 20:44:01 | 29.486 |
| 10/29/2010 23:29:01 | 26.9873 | 10/30/2010 21:04:01 | 29.486 |
| 10/29/2010 23:49:01 | 26.9873 | 10/30/2010 21:24:01 | 29.486 |
| 10/30/2010 00:09:01 | 26.9873 | 10/30/2010 21:44:01 | 29.486 |
| 10/30/2010 00:29:01 | 26.9873 | 10/30/2010 22:04:01 | 29.548 |
| 10/30/2010 00:49:01 | 26.9873 | 10/30/2010 22:24:01 | 29.548 |
| 10/30/2010 01:09:01 | 26.9873 | 10/30/2010 22:44:01 | 29.548 |
| 10/30/2010 01:29:01 | 26.9253 | 10/30/2010 23:04:01 | 29.548 |
| 10/30/2010 01:49:01 | 26.9253 | 10/30/2010 23:24:01 | 29.61  |
| 10/30/2010 02:09:01 | 26.9253 | 10/30/2010 23:44:01 | 29.61  |
| 10/30/2010 02:29:01 | 26.9253 | 10/31/2010 00:04:01 | 29.61  |
| 10/30/2010 02:49:01 | 26.9253 | 10/31/2010 00:24:01 | 29.61  |
| 10/30/2010 03:09:01 | 26.9253 | 10/31/2010 00:44:01 | 29.61  |
| 10/30/2010 03:29:01 | 26.9253 | 10/31/2010 01:04:01 | 29.61  |
| 10/30/2010 03:49:01 | 26.9253 | 10/31/2010 01:24:01 | 29.61  |
| 10/30/2010 04:09:01 | 26.8623 | 10/31/2010 01:44:01 | 29.61  |
| 10/30/2010 04:29:01 | 26.8623 | 10/31/2010 02:04:01 | 29.61  |
| 10/30/2010 04:49:01 | 26.8623 | 10/31/2010 02:24:01 | 29.61  |
| 10/30/2010 05:09:01 | 26.8003 | 10/31/2010 02:44:01 | 29.61  |
| 10/30/2010 05:29:01 | 26.8003 | 10/31/2010 03:04:01 | 29.61  |
| 10/30/2010 05:49:01 | 26.8003 | 10/31/2010 03:24:01 | 29.61  |
| 10/30/2010 06:09:01 | 26.8003 | 10/31/2010 03:44:01 | 29.61  |
| 10/30/2010 06:29:01 | 26.7383 | 10/31/2010 04:04:01 | 29.61  |
| 10/30/2010 06:49:01 | 26.7383 | 10/31/2010 04:24:01 | 29.61  |
| 10/30/2010 07:09:01 | 26.7383 | 10/31/2010 04:44:01 | 29.61  |
| 10/30/2010 07:29:01 | 26.7383 | 10/31/2010 05:04:01 | 29.61  |
| 10/30/2010 07:49:01 | 26.6753 | 10/31/2010 05:24:01 | 29.61  |
| 10/30/2010 08:09:01 | 26.6753 | 10/31/2010 05:44:01 | 29.61  |
| 10/30/2010 08:29:01 | 26.6753 | 10/31/2010 06:04:01 | 29.61  |
| 10/30/2010 08:49:01 | 26.6133 | 10/31/2010 06:24:01 | 29.548 |
| 10/30/2010 09:09:01 | 26.6133 | 10/31/2010 06:44:01 | 29.548 |
| 10/30/2010 09:29:01 | 26.6133 | 10/31/2010 07:04:01 | 29.548 |
| 10/30/2010 09:49:01 | 26.6133 | 10/31/2010 07:24:01 | 29.548 |
| 10/30/2010 10:09:01 | 26.6133 | 10/31/2010 07:44:01 | 29.548 |
| 10/30/2010 10:29:01 | 26.5503 | 10/31/2010 08:04:01 | 29.486 |
| 10/30/2010 10:49:01 | 26.5503 | 10/31/2010 08:24:01 | 29.486 |
| 10/30/2010 11:09:01 | 26.5503 | 10/31/2010 08:44:01 | 29.486 |
| 10/30/2010 11:29:01 | 26.5503 | 10/31/2010 09:04:01 | 29.486 |
| 10/30/2010 11:49:01 | 26.5503 | 10/31/2010 09:24:01 | 29.423 |
| 10/30/2010 12:09:01 | 26.5503 | 10/31/2010 09:44:01 | 29.423 |
| 10/30/2010 12:29:01 | 26.5503 | 10/31/2010 10:04:01 | 29.423 |
| 10/30/2010 12:49:01 | 26.6133 | 10/31/2010 10:24:01 | 29.423 |
| 10/30/2010 13:09:01 | 26.6133 | 10/31/2010 10:44:01 | 29.361 |
| 10/30/2010 13:29:01 | 26.6133 | 10/31/2010 11:04:01 | 29.361 |
| 10/30/2010 13:49:01 | 26.6133 | 10/31/2010 11:24:01 | 29.361 |
| 10/30/2010 14:09:01 | 26.6133 | 10/31/2010 11:44:01 | 29.361 |
| 10/30/2010 14:29:01 | 26.6753 | 10/31/2010 12:04:01 | 29.298 |



|                     |         |                     |        |
|---------------------|---------|---------------------|--------|
| 10/30/2010 14:49:01 | 26.6753 | 10/31/2010 12:24:01 | 29.298 |
| 10/30/2010 15:09:01 | 26.6753 | 10/31/2010 12:44:01 | 29.298 |
| 10/30/2010 15:29:01 | 26.7383 | 10/31/2010 13:04:01 | 29.298 |
| 10/30/2010 15:49:01 | 26.7383 | 10/31/2010 13:24:01 | 29.236 |
| 10/30/2010 16:09:01 | 26.7383 | 10/31/2010 13:44:01 | 29.236 |
| 10/30/2010 16:29:01 | 26.8003 | 10/31/2010 14:04:01 | 29.236 |
| 10/30/2010 16:49:01 | 26.8003 | 10/31/2010 14:24:01 | 29.236 |
| 10/30/2010 17:09:01 | 26.8003 | 10/31/2010 14:44:01 | 29.236 |
| 10/30/2010 17:29:01 | 26.8623 | 10/31/2010 15:04:01 | 29.236 |
| 10/30/2010 17:49:01 | 26.8623 | 10/31/2010 15:24:01 | 29.236 |
| 10/30/2010 18:09:01 | 26.9253 | 10/31/2010 15:44:01 | 29.236 |
| 10/30/2010 18:29:01 | 26.9253 | 10/31/2010 16:04:01 | 29.236 |
| 10/30/2010 18:49:01 | 26.9253 | 10/31/2010 16:24:01 | 29.298 |
| 10/30/2010 19:09:01 | 26.9253 | 10/31/2010 16:44:01 | 29.298 |
| 10/30/2010 19:29:01 | 26.9873 | 10/31/2010 17:04:01 | 29.298 |
| 10/30/2010 19:49:01 | 26.9873 | 10/31/2010 17:24:01 | 29.298 |
| 10/30/2010 20:09:01 | 26.9873 | 10/31/2010 17:44:01 | 29.298 |
| 10/30/2010 20:29:01 | 26.9873 | 10/31/2010 18:04:01 | 29.361 |
| 10/30/2010 20:49:01 | 27.0503 | 10/31/2010 18:24:01 | 29.361 |
| 10/30/2010 21:09:01 | 27.0503 | 10/31/2010 18:44:01 | 29.361 |
| 10/30/2010 21:29:01 | 27.0503 | 10/31/2010 19:04:01 | 29.423 |
| 10/30/2010 21:49:01 | 27.0503 | 10/31/2010 19:24:01 | 29.423 |
| 10/30/2010 22:09:01 | 27.0503 | 10/31/2010 19:44:01 | 29.423 |
| 10/30/2010 22:29:01 | 27.0503 | 10/31/2010 20:04:01 | 29.423 |
| 10/30/2010 22:49:01 | 27.0503 | 10/31/2010 20:24:01 | 29.486 |
| 10/30/2010 23:09:01 | 27.0503 | 10/31/2010 20:44:01 | 29.486 |
| 10/30/2010 23:29:01 | 27.0503 | 10/31/2010 21:04:01 | 29.486 |
| 10/30/2010 23:49:01 | 27.0503 | 10/31/2010 21:24:01 | 29.548 |
| 10/31/2010 00:09:01 | 27.0503 | 10/31/2010 21:44:01 | 29.548 |
| 10/31/2010 00:29:01 | 27.0503 | 10/31/2010 22:04:01 | 29.548 |
| 10/31/2010 00:49:01 | 27.0503 | 10/31/2010 22:24:01 | 29.548 |
| 10/31/2010 01:09:01 | 27.0503 | 10/31/2010 22:44:01 | 29.61  |
| 10/31/2010 01:29:01 | 27.0503 | 10/31/2010 23:04:01 | 29.61  |
| 10/31/2010 01:49:01 | 27.0503 | 10/31/2010 23:24:01 | 29.61  |
| 10/31/2010 02:09:01 | 26.9873 | 10/31/2010 23:44:01 | 29.61  |
| 10/31/2010 02:29:01 | 26.9873 | 11/1/2010 00:04:01  | 29.61  |
| 10/31/2010 02:49:01 | 26.9873 | 11/1/2010 00:24:01  | 29.61  |
| 10/31/2010 03:09:01 | 26.9873 | 11/1/2010 00:44:01  | 29.673 |
| 10/31/2010 03:29:01 | 26.9873 | 11/1/2010 01:04:01  | 29.673 |
| 10/31/2010 03:49:01 | 26.9873 | 11/1/2010 01:24:01  | 29.673 |
| 10/31/2010 04:09:01 | 26.9253 | 11/1/2010 01:44:01  | 29.673 |
| 10/31/2010 04:29:01 | 26.9253 | 11/1/2010 02:04:01  | 29.673 |
| 10/31/2010 04:49:01 | 26.9253 | 11/1/2010 02:24:01  | 29.673 |
| 10/31/2010 05:09:01 | 26.9253 | 11/1/2010 02:44:01  | 29.673 |
| 10/31/2010 05:29:01 | 26.9253 | 11/1/2010 03:04:01  | 29.673 |
| 10/31/2010 05:49:01 | 26.9253 | 11/1/2010 03:24:01  | 29.673 |
| 10/31/2010 06:09:01 | 26.8623 | 11/1/2010 03:44:01  | 29.673 |
| 10/31/2010 06:29:01 | 26.8623 | 11/1/2010 04:04:01  | 29.673 |
| 10/31/2010 06:49:01 | 26.8623 | 11/1/2010 04:24:01  | 29.61  |
| 10/31/2010 07:09:01 | 26.8623 | 11/1/2010 04:44:01  | 29.61  |

|                     |         |                    |        |
|---------------------|---------|--------------------|--------|
| 10/31/2010 07:29:01 | 26.8003 | 11/1/2010 05:04:01 | 29.61  |
| 10/31/2010 07:49:01 | 26.8003 | 11/1/2010 05:24:01 | 29.61  |
| 10/31/2010 08:09:01 | 26.8003 | 11/1/2010 05:44:01 | 29.61  |
| 10/31/2010 08:29:01 | 26.8003 | 11/1/2010 06:04:01 | 29.61  |
| 10/31/2010 08:49:01 | 26.7383 | 11/1/2010 06:24:01 | 29.548 |
| 10/31/2010 09:09:01 | 26.7383 | 11/1/2010 06:44:01 | 29.548 |
| 10/31/2010 09:29:01 | 26.7383 | 11/1/2010 07:04:01 | 29.548 |
| 10/31/2010 09:49:01 | 26.7383 | 11/1/2010 07:24:01 | 29.548 |
| 10/31/2010 10:09:01 | 26.7383 | 11/1/2010 07:44:01 | 29.486 |
| 10/31/2010 10:29:01 | 26.6753 | 11/1/2010 08:04:01 | 29.486 |
| 10/31/2010 10:49:01 | 26.6753 | 11/1/2010 08:24:01 | 29.486 |
| 10/31/2010 11:09:01 | 26.6753 | 11/1/2010 08:44:01 | 29.423 |
| 10/31/2010 11:29:01 | 26.6753 | 11/1/2010 09:04:01 | 29.423 |
| 10/31/2010 11:49:01 | 26.6753 | 11/1/2010 09:24:01 | 29.423 |
| 10/31/2010 12:09:01 | 26.6753 | 11/1/2010 09:44:01 | 29.423 |
| 10/31/2010 12:29:01 | 26.6753 | 11/1/2010 10:04:01 | 29.361 |
| 10/31/2010 12:49:01 | 26.6753 | 11/1/2010 10:24:01 | 29.361 |
| 10/31/2010 13:09:01 | 26.6753 | 11/1/2010 10:44:01 | 29.298 |
| 10/31/2010 13:29:01 | 26.7383 | 11/1/2010 11:04:01 | 29.298 |
| 10/31/2010 13:49:01 | 26.7383 | 11/1/2010 11:24:01 | 29.298 |
| 10/31/2010 14:09:01 | 26.7383 | 11/1/2010 11:44:01 | 29.236 |
| 10/31/2010 14:29:01 | 26.7383 | 11/1/2010 12:04:01 | 29.236 |
| 10/31/2010 14:49:01 | 26.7383 | 11/1/2010 12:24:01 | 29.236 |
| 10/31/2010 15:09:01 | 26.8003 | 11/1/2010 12:44:01 | 29.174 |
| 10/31/2010 15:29:01 | 26.8003 | 11/1/2010 13:04:01 | 29.174 |
| 10/31/2010 15:49:01 | 26.8003 | 11/1/2010 13:24:01 | 29.174 |
| 10/31/2010 16:09:01 | 26.8623 | 11/1/2010 13:44:01 | 29.111 |
| 10/31/2010 16:29:01 | 26.8623 | 11/1/2010 14:04:01 | 29.111 |
| 10/31/2010 16:49:01 | 26.9253 | 11/1/2010 14:24:01 | 29.111 |
| 10/31/2010 17:09:01 | 26.9253 | 11/1/2010 14:44:01 | 29.111 |
| 10/31/2010 17:29:01 | 26.9253 | 11/1/2010 15:04:01 | 29.111 |
| 10/31/2010 17:49:01 | 26.9873 | 11/1/2010 15:24:01 | 29.111 |
| 10/31/2010 18:09:01 | 26.9873 | 11/1/2010 15:44:01 | 29.111 |
| 10/31/2010 18:29:01 | 26.9873 | 11/1/2010 16:04:01 | 29.111 |
| 10/31/2010 18:49:01 | 27.0503 | 11/1/2010 16:24:01 | 29.111 |
| 10/31/2010 19:09:01 | 27.0503 | 11/1/2010 16:44:01 | 29.111 |
| 10/31/2010 19:29:01 | 27.0503 | 11/1/2010 17:04:01 | 29.111 |
| 10/31/2010 19:49:01 | 27.0503 | 11/1/2010 17:24:01 | 29.111 |
| 10/31/2010 20:09:01 | 27.1123 | 11/1/2010 17:44:01 | 29.111 |
| 10/31/2010 20:29:01 | 27.1123 | 11/1/2010 18:04:01 | 29.111 |
| 10/31/2010 20:49:01 | 27.1123 | 11/1/2010 18:24:01 | 29.111 |
| 10/31/2010 21:09:01 | 27.1123 | 11/1/2010 18:44:01 | 29.111 |
| 10/31/2010 21:29:01 | 27.1123 | 11/1/2010 19:04:01 | 29.111 |
| 10/31/2010 21:49:01 | 27.1123 | 11/1/2010 19:24:01 | 29.111 |
| 10/31/2010 22:09:01 | 27.1123 | 11/1/2010 19:44:01 | 29.174 |
| 10/31/2010 22:29:01 | 27.1123 | 11/1/2010 20:04:01 | 29.174 |
| 10/31/2010 22:49:01 | 27.1123 | 11/1/2010 20:24:01 | 29.174 |
| 10/31/2010 23:09:01 | 27.1123 | 11/1/2010 20:44:01 | 29.174 |
| 10/31/2010 23:29:01 | 27.1123 | 11/1/2010 21:04:01 | 29.174 |
| 10/31/2010 23:49:01 | 27.1123 | 11/1/2010 21:24:01 | 29.174 |

|                    |         |                    |        |
|--------------------|---------|--------------------|--------|
| 11/1/2010 00:09:01 | 27.1123 | 11/1/2010 21:44:01 | 29.174 |
| 11/1/2010 00:29:01 | 27.1123 | 11/1/2010 22:04:01 | 29.174 |
| 11/1/2010 00:49:01 | 27.1123 | 11/1/2010 22:24:01 | 29.174 |
| 11/1/2010 01:09:01 | 27.1123 | 11/1/2010 22:44:01 | 29.174 |
| 11/1/2010 01:29:01 | 27.1123 | 11/1/2010 23:04:01 | 29.174 |
| 11/1/2010 01:49:01 | 27.0503 | 11/1/2010 23:24:01 | 29.174 |
| 11/1/2010 02:09:01 | 27.0503 | 11/1/2010 23:44:01 | 29.174 |
| 11/1/2010 02:29:01 | 27.0503 | 11/2/2010 00:04:01 | 29.174 |
| 11/1/2010 02:49:01 | 27.0503 | 11/2/2010 00:24:01 | 29.174 |
| 11/1/2010 03:09:01 | 27.0503 | 11/2/2010 00:44:01 | 29.174 |
| 11/1/2010 03:29:01 | 27.0503 | 11/2/2010 01:04:01 | 29.174 |
| 11/1/2010 03:49:01 | 26.9873 | 11/2/2010 01:24:01 | 29.111 |
| 11/1/2010 04:09:01 | 26.9873 | 11/2/2010 01:44:01 | 29.111 |
| 11/1/2010 04:29:01 | 26.9873 | 11/2/2010 02:04:01 | 29.111 |
| 11/1/2010 04:49:01 | 26.9873 | 11/2/2010 02:24:01 | 29.111 |
| 11/1/2010 05:09:01 | 26.9253 | 11/2/2010 02:44:01 | 29.111 |
| 11/1/2010 05:29:01 | 26.9253 | 11/2/2010 03:04:01 | 29.111 |
| 11/1/2010 05:49:01 | 26.9253 | 11/2/2010 03:24:01 | 29.111 |
| 11/1/2010 06:09:01 | 26.9253 | 11/2/2010 03:44:01 | 29.111 |
| 11/1/2010 06:29:01 | 26.9253 | 11/2/2010 04:04:01 | 29.049 |
| 11/1/2010 06:49:01 | 26.8623 | 11/2/2010 04:24:01 | 29.049 |
| 11/1/2010 07:09:01 | 26.8623 | 11/2/2010 04:44:01 | 29.049 |
| 11/1/2010 07:29:01 | 26.8623 | 11/2/2010 05:04:01 | 29.049 |
| 11/1/2010 07:49:01 | 26.8003 | 11/2/2010 05:24:01 | 28.986 |
| 11/1/2010 08:09:01 | 26.8003 | 11/2/2010 05:44:01 | 28.986 |
| 11/1/2010 08:29:01 | 26.8003 | 11/2/2010 06:04:01 | 28.986 |
| 11/1/2010 08:49:01 | 26.7383 | 11/2/2010 06:24:01 | 28.986 |
| 11/1/2010 09:09:01 | 26.7383 | 11/2/2010 06:44:01 | 28.986 |
| 11/1/2010 09:29:01 | 26.7383 | 11/2/2010 07:04:01 | 28.924 |
| 11/1/2010 09:49:01 | 26.7383 | 11/2/2010 07:24:01 | 28.924 |
| 11/1/2010 10:09:01 | 26.7383 | 11/2/2010 07:44:01 | 28.924 |
| 11/1/2010 10:29:01 | 26.6753 | 11/2/2010 08:04:01 | 28.861 |
| 11/1/2010 10:49:01 | 26.6753 | 11/2/2010 08:24:01 | 28.861 |
| 11/1/2010 11:09:01 | 26.6753 | 11/2/2010 08:44:01 | 28.861 |
| 11/1/2010 11:29:01 | 26.6753 | 11/2/2010 09:04:01 | 28.799 |
| 11/1/2010 11:49:01 | 26.6753 | 11/2/2010 09:24:01 | 28.799 |
| 11/1/2010 12:09:01 | 26.6753 | 11/2/2010 09:44:01 | 28.799 |
| 11/1/2010 12:29:01 | 26.6753 | 11/2/2010 10:04:01 | 28.737 |
| 11/1/2010 12:49:01 | 26.6753 | 11/2/2010 10:24:01 | 28.737 |
| 11/1/2010 13:09:01 | 26.6753 | 11/2/2010 10:44:01 | 28.737 |
| 11/1/2010 13:29:01 | 26.7383 | 11/2/2010 11:04:01 | 28.737 |
| 11/1/2010 13:49:01 | 26.7383 | 11/2/2010 11:24:01 | 28.674 |
| 11/1/2010 14:09:01 | 26.7383 | 11/2/2010 11:44:01 | 28.674 |
| 11/1/2010 14:29:01 | 26.7383 | 11/2/2010 12:04:01 | 28.674 |
| 11/1/2010 14:49:01 | 26.8003 | 11/2/2010 12:24:01 | 28.612 |
| 11/1/2010 15:09:01 | 26.8003 | 11/2/2010 12:44:01 | 28.612 |
| 11/1/2010 15:29:01 | 26.8003 | 11/2/2010 13:04:01 | 28.612 |
| 11/1/2010 15:49:01 | 26.8623 | 11/2/2010 13:24:01 | 28.612 |
| 11/1/2010 16:09:01 | 26.8623 | 11/2/2010 13:44:01 | 28.612 |
| 11/1/2010 16:29:01 | 26.8623 | 11/2/2010 14:04:01 | 28.612 |

|                    |         |                    |        |
|--------------------|---------|--------------------|--------|
| 11/1/2010 16:49:01 | 26.8623 | 11/2/2010 14:24:01 | 28.549 |
| 11/1/2010 17:09:01 | 26.9253 | 11/2/2010 14:44:01 | 28.612 |
| 11/1/2010 17:29:01 | 26.9253 | 11/2/2010 15:04:01 | 28.612 |
| 11/1/2010 17:49:01 | 26.9253 | 11/2/2010 15:24:01 | 28.612 |
| 11/1/2010 18:09:01 | 26.9873 | 11/2/2010 15:44:01 | 28.612 |
| 11/1/2010 18:29:01 | 26.9873 | 11/2/2010 16:04:01 | 28.612 |
| 11/1/2010 18:49:01 | 26.9873 | 11/2/2010 16:24:01 | 28.612 |
| 11/1/2010 19:09:01 | 26.9873 | 11/2/2010 16:44:01 | 28.612 |
| 11/1/2010 19:29:01 | 27.0503 | 11/2/2010 17:04:01 | 28.674 |
| 11/1/2010 19:49:01 | 27.0503 | 11/2/2010 17:24:01 | 28.674 |
| 11/1/2010 20:09:01 | 27.0503 | 11/2/2010 17:44:01 | 28.674 |
| 11/1/2010 20:29:01 | 27.0503 | 11/2/2010 18:04:01 | 28.737 |
| 11/1/2010 20:49:01 | 27.0503 | 11/2/2010 18:24:01 | 28.737 |
| 11/1/2010 21:09:01 | 27.0503 | 11/2/2010 18:44:01 | 28.737 |
| 11/1/2010 21:29:01 | 27.0503 | 11/2/2010 19:04:01 | 28.737 |
| 11/1/2010 21:49:01 | 27.0503 | 11/2/2010 19:24:01 | 28.799 |
| 11/1/2010 22:09:01 | 27.0503 | 11/2/2010 19:44:01 | 28.799 |
| 11/1/2010 22:29:01 | 27.0503 | 11/2/2010 20:04:01 | 28.861 |
| 11/1/2010 22:49:01 | 27.0503 | 11/2/2010 20:24:01 | 28.861 |
| 11/1/2010 23:09:01 | 27.0503 | 11/2/2010 20:44:01 | 28.861 |
| 11/1/2010 23:29:01 | 27.0503 | 11/2/2010 21:04:01 | 28.861 |
| 11/1/2010 23:49:01 | 27.0503 | 11/2/2010 21:24:01 | 28.861 |
| 11/2/2010 00:09:01 | 27.0503 | 11/2/2010 21:44:01 | 28.924 |
| 11/2/2010 00:29:01 | 27.0503 | 11/2/2010 22:04:01 | 28.924 |
| 11/2/2010 00:49:01 | 26.9873 | 11/2/2010 22:24:01 | 28.924 |
| 11/2/2010 01:09:01 | 26.9873 | 11/2/2010 22:44:01 | 28.924 |
| 11/2/2010 01:29:01 | 26.9873 | 11/2/2010 23:04:01 | 28.986 |
| 11/2/2010 01:49:01 | 26.9873 | 11/2/2010 23:24:01 | 28.986 |
| 11/2/2010 02:09:01 | 26.9873 | 11/2/2010 23:44:01 | 28.986 |
| 11/2/2010 02:29:01 | 26.9873 | 11/3/2010 00:04:01 | 28.986 |
| 11/2/2010 02:49:01 | 26.9873 | 11/3/2010 00:24:01 | 28.986 |
| 11/2/2010 03:09:01 | 26.9253 | 11/3/2010 00:44:01 | 28.986 |
| 11/2/2010 03:29:01 | 26.9253 | 11/3/2010 01:04:01 | 28.986 |
| 11/2/2010 03:49:01 | 26.9253 | 11/3/2010 01:24:01 | 28.986 |
| 11/2/2010 04:09:01 | 26.9253 | 11/3/2010 01:44:01 | 28.986 |
| 11/2/2010 04:29:01 | 26.9253 | 11/3/2010 02:04:01 | 28.986 |
| 11/2/2010 04:49:01 | 26.8623 | 11/3/2010 02:24:01 | 28.986 |
| 11/2/2010 05:09:01 | 26.8623 | 11/3/2010 02:44:01 | 28.986 |
| 11/2/2010 05:29:01 | 26.8623 | 11/3/2010 03:04:01 | 28.986 |
| 11/2/2010 05:49:01 | 26.8623 | 11/3/2010 03:24:01 | 28.986 |
| 11/2/2010 06:09:01 | 26.8003 | 11/3/2010 03:44:01 | 28.986 |
| 11/2/2010 06:29:01 | 26.8003 | 11/3/2010 04:04:01 | 28.986 |
| 11/2/2010 06:49:01 | 26.8003 | 11/3/2010 04:24:01 | 28.986 |
| 11/2/2010 07:09:01 | 26.8003 | 11/3/2010 04:44:01 | 28.986 |
| 11/2/2010 07:29:01 | 26.7383 | 11/3/2010 05:04:01 | 28.924 |
| 11/2/2010 07:49:01 | 26.7383 | 11/3/2010 05:24:01 | 28.924 |
| 11/2/2010 08:09:01 | 26.7383 | 11/3/2010 05:44:01 | 28.924 |
| 11/2/2010 08:29:01 | 26.6753 | 11/3/2010 06:04:01 | 28.924 |
| 11/2/2010 08:49:01 | 26.6753 | 11/3/2010 06:24:01 | 28.924 |
| 11/2/2010 09:09:01 | 26.6753 | 11/3/2010 06:44:01 | 28.924 |

|                    |         |                    |        |
|--------------------|---------|--------------------|--------|
| 11/2/2010 09:29:01 | 26.6753 | 11/3/2010 07:04:01 | 28.924 |
| 11/2/2010 09:49:01 | 26.6753 | 11/3/2010 07:24:01 | 28.861 |
| 11/2/2010 10:09:01 | 26.6133 | 11/3/2010 07:44:01 | 28.861 |
| 11/2/2010 10:29:01 | 26.6133 | 11/3/2010 08:04:01 | 28.861 |
| 11/2/2010 10:49:01 | 26.6133 | 11/3/2010 08:24:01 | 28.861 |
| 11/2/2010 11:09:01 | 26.6133 | 11/3/2010 08:44:01 | 28.799 |
| 11/2/2010 11:29:01 | 26.6133 | 11/3/2010 09:04:01 | 28.799 |
| 11/2/2010 11:49:01 | 26.6133 | 11/3/2010 09:24:01 | 28.799 |
| 11/2/2010 12:09:01 | 26.6133 | 11/3/2010 09:44:01 | 28.799 |
| 11/2/2010 12:29:01 | 26.6133 | 11/3/2010 10:04:01 | 28.799 |
| 11/2/2010 12:49:01 | 26.6133 | 11/3/2010 10:24:01 | 28.737 |
| 11/2/2010 13:09:01 | 26.6133 | 11/3/2010 10:44:01 | 28.737 |
| 11/2/2010 13:29:01 | 26.6753 | 11/3/2010 11:04:01 | 28.737 |
| 11/2/2010 13:49:01 | 26.6753 | 11/3/2010 11:24:01 | 28.737 |
| 11/2/2010 14:09:01 | 26.6753 | 11/3/2010 11:44:01 | 28.674 |
| 11/2/2010 14:29:01 | 26.6753 | 11/3/2010 12:04:01 | 28.674 |
| 11/2/2010 14:49:01 | 26.7383 | 11/3/2010 12:24:01 | 28.674 |
| 11/2/2010 15:09:01 | 26.7383 | 11/3/2010 12:44:01 | 28.674 |
| 11/2/2010 15:29:01 | 26.7383 | 11/3/2010 13:04:01 | 28.674 |
| 11/2/2010 15:49:01 | 26.8003 | 11/3/2010 13:24:01 | 28.674 |
| 11/2/2010 16:09:01 | 26.8003 | 11/3/2010 13:44:01 | 28.612 |
| 11/2/2010 16:29:01 | 26.8003 | 11/3/2010 14:04:01 | 28.612 |
| 11/2/2010 16:49:01 | 26.8623 | 11/3/2010 14:24:01 | 28.612 |
| 11/2/2010 17:09:01 | 26.8623 | 11/3/2010 14:44:01 | 28.674 |
| 11/2/2010 17:29:01 | 26.8623 | 11/3/2010 15:04:01 | 28.674 |
| 11/2/2010 17:49:01 | 26.9253 | 11/3/2010 15:24:01 | 28.674 |
| 11/2/2010 18:09:01 | 26.9253 | 11/3/2010 15:44:01 | 28.674 |
| 11/2/2010 18:29:01 | 26.9253 | 11/3/2010 16:04:01 | 28.674 |
| 11/2/2010 18:49:01 | 26.9253 | 11/3/2010 16:24:01 | 28.674 |
| 11/2/2010 19:09:01 | 26.9873 | 11/3/2010 16:44:01 | 28.674 |
| 11/2/2010 19:29:01 | 26.9873 | 11/3/2010 17:04:01 | 28.674 |
| 11/2/2010 19:49:01 | 26.9873 | 11/3/2010 17:24:01 | 28.737 |
| 11/2/2010 20:09:01 | 26.9873 | 11/3/2010 17:44:01 | 28.737 |
| 11/2/2010 20:29:01 | 26.9873 | 11/3/2010 18:04:01 | 28.737 |
| 11/2/2010 20:49:01 | 26.9873 | 11/3/2010 18:24:01 | 28.737 |
| 11/2/2010 21:09:01 | 27.0503 | 11/3/2010 18:44:01 | 28.737 |
| 11/2/2010 21:29:01 | 27.0503 | 11/3/2010 19:04:01 | 28.799 |
| 11/2/2010 21:49:01 | 27.0503 | 11/3/2010 19:24:01 | 28.799 |
| 11/2/2010 22:09:01 | 27.0503 | 11/3/2010 19:44:01 | 28.799 |
| 11/2/2010 22:29:01 | 27.0503 | 11/3/2010 20:04:01 | 28.861 |
| 11/2/2010 22:49:01 | 26.9873 | 11/3/2010 20:24:01 | 28.861 |
| 11/2/2010 23:09:01 | 27.0503 | 11/3/2010 20:44:01 | 28.861 |
| 11/2/2010 23:29:01 | 27.0503 | 11/3/2010 21:04:01 | 28.861 |
| 11/2/2010 23:49:01 | 26.9873 | 11/3/2010 21:24:01 | 28.924 |
| 11/3/2010 00:09:01 | 26.9873 | 11/3/2010 21:44:01 | 28.924 |
| 11/3/2010 00:29:01 | 26.9873 | 11/3/2010 22:04:01 | 28.924 |
| 11/3/2010 00:49:01 | 26.9873 | 11/3/2010 22:24:01 | 28.924 |
| 11/3/2010 01:09:01 | 26.9873 | 11/3/2010 22:44:01 | 28.986 |
| 11/3/2010 01:29:01 | 26.9873 | 11/3/2010 23:04:01 | 28.986 |
| 11/3/2010 01:49:01 | 26.9873 | 11/3/2010 23:24:01 | 28.986 |

|                    |         |                    |        |
|--------------------|---------|--------------------|--------|
| 11/3/2010 02:09:01 | 26.9873 | 11/3/2010 23:44:01 | 28.986 |
| 11/3/2010 02:29:01 | 26.9253 | 11/4/2010 00:04:01 | 28.986 |
| 11/3/2010 02:49:01 | 26.9253 | 11/4/2010 00:24:01 | 28.986 |
| 11/3/2010 03:09:01 | 26.9253 | 11/4/2010 00:44:01 | 28.986 |
| 11/3/2010 03:29:01 | 26.9253 | 11/4/2010 01:04:01 | 28.986 |
| 11/3/2010 03:49:01 | 26.9253 | 11/4/2010 01:24:01 | 29.049 |
| 11/3/2010 04:09:01 | 26.9253 | 11/4/2010 01:44:01 | 28.986 |
| 11/3/2010 04:29:01 | 26.9253 | 11/4/2010 02:04:01 | 28.986 |
| 11/3/2010 04:49:01 | 26.8623 | 11/4/2010 02:24:01 | 29.049 |
| 11/3/2010 05:09:01 | 26.8623 | 11/4/2010 02:44:01 | 28.986 |
| 11/3/2010 05:29:01 | 26.8623 | 11/4/2010 03:04:01 | 29.049 |
| 11/3/2010 05:49:01 | 26.8623 | 11/4/2010 03:24:01 | 28.986 |
| 11/3/2010 06:09:01 | 26.8003 | 11/4/2010 03:44:01 | 28.986 |
| 11/3/2010 06:29:01 | 26.8003 | 11/4/2010 04:04:01 | 28.986 |
| 11/3/2010 06:49:01 | 26.8003 | 11/4/2010 04:24:01 | 28.986 |
| 11/3/2010 07:09:01 | 26.8003 | 11/4/2010 04:44:01 | 28.986 |
| 11/3/2010 07:29:01 | 26.8003 | 11/4/2010 05:04:01 | 28.986 |
| 11/3/2010 07:49:01 | 26.7383 | 11/4/2010 05:24:01 | 28.986 |
| 11/3/2010 08:09:01 | 26.7383 | 11/4/2010 05:44:01 | 28.986 |
| 11/3/2010 08:29:01 | 26.7383 | 11/4/2010 06:04:01 | 28.986 |
| 11/3/2010 08:49:01 | 26.7383 | 11/4/2010 06:24:01 | 28.986 |
| 11/3/2010 09:09:01 | 26.7383 | 11/4/2010 06:44:01 | 28.924 |
| 11/3/2010 09:29:01 | 26.7383 | 11/4/2010 07:04:01 | 28.924 |
| 11/3/2010 09:49:01 | 26.7383 | 11/4/2010 07:24:01 | 28.924 |
| 11/3/2010 10:09:01 | 26.6753 | 11/4/2010 07:44:01 | 28.924 |
| 11/3/2010 10:29:01 | 26.6753 | 11/4/2010 08:04:01 | 28.924 |
| 11/3/2010 10:49:01 | 26.6753 | 11/4/2010 08:24:01 | 28.861 |
| 11/3/2010 11:09:01 | 26.6753 | 11/4/2010 08:44:01 | 28.861 |
| 11/3/2010 11:29:01 | 26.6753 | 11/4/2010 09:04:01 | 28.861 |
| 11/3/2010 11:49:01 | 26.6753 | 11/4/2010 09:24:01 | 28.861 |
| 11/3/2010 12:09:01 | 26.6753 | 11/4/2010 09:44:01 | 28.861 |
| 11/3/2010 12:29:01 | 26.7383 | 11/4/2010 10:04:01 | 28.799 |
| 11/3/2010 12:49:01 | 26.7383 | 11/4/2010 10:24:01 | 28.799 |
| 11/3/2010 13:09:01 | 26.7383 | 11/4/2010 10:44:01 | 28.799 |
| 11/3/2010 13:29:01 | 26.7383 | 11/4/2010 11:04:01 | 28.799 |
| 11/3/2010 13:49:01 | 26.7383 | 11/4/2010 11:24:01 | 28.737 |
| 11/3/2010 14:09:01 | 26.7383 | 11/4/2010 11:44:01 | 28.737 |
| 11/3/2010 14:29:01 | 26.8003 | 11/4/2010 12:04:01 | 28.737 |
| 11/3/2010 14:49:01 | 26.8003 | 11/4/2010 12:24:01 | 28.737 |
| 11/3/2010 15:09:01 | 26.8003 | 11/4/2010 12:44:01 | 28.737 |
| 11/3/2010 15:29:01 | 26.8003 | 11/4/2010 13:04:01 | 28.674 |
| 11/3/2010 15:49:01 | 26.8623 | 11/4/2010 13:24:01 | 28.674 |
| 11/3/2010 16:09:01 | 26.8623 | 11/4/2010 13:44:01 | 28.674 |
| 11/3/2010 16:29:01 | 26.8623 | 11/4/2010 14:04:01 | 28.674 |
| 11/3/2010 16:49:01 | 26.9253 | 11/4/2010 14:24:01 | 28.674 |
| 11/3/2010 17:09:01 | 26.9253 | 11/4/2010 14:44:01 | 28.674 |
| 11/3/2010 17:29:01 | 26.9253 | 11/4/2010 15:04:01 | 28.674 |
| 11/3/2010 17:49:01 | 26.9253 | 11/4/2010 15:24:01 | 28.737 |
| 11/3/2010 18:09:01 | 26.9873 | 11/4/2010 15:44:01 | 28.737 |
| 11/3/2010 18:29:01 | 26.9873 | 11/4/2010 16:04:01 | 28.737 |

|                    |         |                    |        |
|--------------------|---------|--------------------|--------|
| 11/3/2010 18:49:01 | 26.9873 | 11/4/2010 16:24:01 | 28.799 |
| 11/3/2010 19:09:01 | 26.9873 | 11/4/2010 16:44:01 | 28.799 |
| 11/3/2010 19:29:01 | 27.0503 | 11/4/2010 17:04:01 | 28.799 |
| 11/3/2010 19:49:01 | 27.0503 | 11/4/2010 17:24:01 | 28.861 |
| 11/3/2010 20:09:01 | 27.0503 | 11/4/2010 17:44:01 | 28.861 |
| 11/3/2010 20:29:01 | 27.0503 | 11/4/2010 18:04:01 | 28.924 |
| 11/3/2010 20:49:01 | 27.0503 | 11/4/2010 18:24:01 | 28.924 |
| 11/3/2010 21:09:01 | 27.0503 | 11/4/2010 18:44:01 | 28.986 |
| 11/3/2010 21:29:01 | 27.0503 | 11/4/2010 19:04:01 | 28.986 |
| 11/3/2010 21:49:01 | 27.0503 | 11/4/2010 19:24:01 | 29.049 |
| 11/3/2010 22:09:01 | 27.0503 | 11/4/2010 19:44:01 | 29.049 |
| 11/3/2010 22:29:01 | 27.0503 | 11/4/2010 20:04:01 | 29.111 |
| 11/3/2010 22:49:01 | 27.0503 | 11/4/2010 20:24:01 | 29.111 |
| 11/3/2010 23:09:01 | 27.0503 | 11/4/2010 20:44:01 | 29.111 |
| 11/3/2010 23:29:01 | 27.0503 | 11/4/2010 21:04:01 | 29.174 |
| 11/3/2010 23:49:01 | 27.0503 | 11/4/2010 21:24:01 | 29.174 |
| 11/4/2010 00:09:01 | 27.0503 | 11/4/2010 21:44:01 | 29.236 |
| 11/4/2010 00:29:01 | 27.0503 | 11/4/2010 22:04:01 | 29.236 |
| 11/4/2010 00:49:01 | 27.0503 | 11/4/2010 22:24:01 | 29.236 |
| 11/4/2010 01:09:01 | 27.0503 | 11/4/2010 22:44:01 | 29.298 |
| 11/4/2010 01:29:01 | 27.0503 | 11/4/2010 23:04:01 | 29.298 |
| 11/4/2010 01:49:01 | 27.0503 | 11/4/2010 23:24:01 | 29.298 |
| 11/4/2010 02:09:01 | 26.9873 | 11/4/2010 23:44:01 | 29.361 |
| 11/4/2010 02:29:01 | 26.9873 | 11/5/2010 00:04:01 | 29.361 |
| 11/4/2010 02:49:01 | 26.9873 | 11/5/2010 00:24:01 | 29.361 |
| 11/4/2010 03:09:01 | 26.9873 | 11/5/2010 00:44:01 | 29.361 |
| 11/4/2010 03:29:01 | 26.9873 | 11/5/2010 01:04:01 | 29.361 |
| 11/4/2010 03:49:01 | 26.9253 | 11/5/2010 01:24:01 | 29.361 |
| 11/4/2010 04:09:01 | 26.9253 | 11/5/2010 01:44:01 | 29.361 |
| 11/4/2010 04:29:01 | 26.9253 | 11/5/2010 02:04:01 | 29.361 |
| 11/4/2010 04:49:01 | 26.9253 | 11/5/2010 02:24:01 | 29.361 |
| 11/4/2010 05:09:01 | 26.9253 | 11/5/2010 02:44:01 | 29.361 |
| 11/4/2010 05:29:01 | 26.8623 | 11/5/2010 03:04:01 | 29.361 |
| 11/4/2010 05:49:01 | 26.8623 | 11/5/2010 03:24:01 | 29.361 |
| 11/4/2010 06:09:01 | 26.8623 | 11/5/2010 03:44:01 | 29.361 |
| 11/4/2010 06:29:01 | 26.8623 | 11/5/2010 04:04:01 | 29.361 |
| 11/4/2010 06:49:01 | 26.8623 | 11/5/2010 04:24:01 | 29.361 |
| 11/4/2010 07:09:01 | 26.8003 | 11/5/2010 04:44:01 | 29.361 |
| 11/4/2010 07:29:01 | 26.8003 | 11/5/2010 05:04:01 | 29.361 |
| 11/4/2010 07:49:01 | 26.8003 | 11/5/2010 05:24:01 | 29.361 |
| 11/4/2010 08:09:01 | 26.8003 | 11/5/2010 05:44:01 | 29.361 |
| 11/4/2010 08:29:01 | 26.8003 | 11/5/2010 06:04:01 | 29.361 |
| 11/4/2010 08:49:01 | 26.7383 | 11/5/2010 06:24:01 | 29.298 |
| 11/4/2010 09:09:01 | 26.7383 | 11/5/2010 06:44:01 | 29.298 |
| 11/4/2010 09:29:01 | 26.7383 | 11/5/2010 07:04:01 | 29.298 |
| 11/4/2010 09:49:01 | 26.7383 | 11/5/2010 07:24:01 | 29.298 |
| 11/4/2010 10:09:01 | 26.6753 | 11/5/2010 07:44:01 | 29.236 |
| 11/4/2010 10:29:01 | 26.6753 | 11/5/2010 08:04:01 | 29.236 |
| 11/4/2010 10:49:01 | 26.6753 | 11/5/2010 08:24:01 | 29.236 |
| 11/4/2010 11:09:01 | 26.6753 | 11/5/2010 08:44:01 | 29.174 |

|                    |         |                    |        |
|--------------------|---------|--------------------|--------|
| 11/4/2010 11:29:01 | 26.6753 | 11/5/2010 09:04:01 | 29.174 |
| 11/4/2010 11:49:01 | 26.6753 | 11/5/2010 09:24:01 | 29.174 |
| 11/4/2010 12:09:01 | 26.6753 | 11/5/2010 09:44:01 | 29.174 |
| 11/4/2010 12:29:01 | 26.6753 | 11/5/2010 10:04:01 | 29.111 |
| 11/4/2010 12:49:01 | 26.6753 | 11/5/2010 10:24:01 | 29.111 |
| 11/4/2010 13:09:01 | 26.6753 | 11/5/2010 10:44:01 | 29.049 |
| 11/4/2010 13:29:01 | 26.7383 | 11/5/2010 11:04:01 | 29.049 |
| 11/4/2010 13:49:01 | 26.7383 | 11/5/2010 11:24:01 | 29.049 |
| 11/4/2010 14:09:01 | 26.7383 | 11/5/2010 11:44:01 | 28.986 |
| 11/4/2010 14:29:01 | 26.7383 | 11/5/2010 12:04:01 | 28.986 |
| 11/4/2010 14:49:01 | 26.8003 | 11/5/2010 12:24:01 | 28.986 |
| 11/4/2010 15:09:01 | 26.8003 | 11/5/2010 12:44:01 | 28.924 |
| 11/4/2010 15:29:01 | 26.8623 | 11/5/2010 13:04:01 | 28.924 |
| 11/4/2010 15:49:01 | 26.8623 | 11/5/2010 13:24:01 | 28.924 |
| 11/4/2010 16:09:01 | 26.8623 | 11/5/2010 13:44:01 | 28.861 |
| 11/4/2010 16:29:01 | 26.9253 | 11/5/2010 14:04:01 | 28.861 |
| 11/4/2010 16:49:01 | 26.9253 | 11/5/2010 14:24:01 | 28.861 |
| 11/4/2010 17:09:01 | 26.9873 | 11/5/2010 14:44:01 | 28.861 |
| 11/4/2010 17:29:01 | 26.9873 | 11/5/2010 15:04:01 | 28.861 |
| 11/4/2010 17:49:01 | 26.9873 | 11/5/2010 15:24:01 | 28.861 |
| 11/4/2010 18:09:01 | 27.0503 | 11/5/2010 15:44:01 | 28.861 |
| 11/4/2010 18:29:01 | 27.0503 | 11/5/2010 16:04:01 | 28.861 |
| 11/4/2010 18:49:01 | 27.1123 | 11/5/2010 16:24:01 | 28.861 |
| 11/4/2010 19:09:01 | 27.1123 | 11/5/2010 16:44:01 | 28.924 |
| 11/4/2010 19:29:01 | 27.1123 | 11/5/2010 17:04:01 | 28.924 |
| 11/4/2010 19:49:01 | 27.1123 | 11/5/2010 17:24:01 | 28.924 |
| 11/4/2010 20:09:01 | 27.1123 | 11/5/2010 17:44:01 | 28.924 |
| 11/4/2010 20:29:01 | 27.1753 | 11/5/2010 18:04:01 | 28.986 |
| 11/4/2010 20:49:01 | 27.1753 | 11/5/2010 18:24:01 | 28.986 |
| 11/4/2010 21:09:01 | 27.1753 | 11/5/2010 18:44:01 | 28.986 |
| 11/4/2010 21:29:01 | 27.1753 | 11/5/2010 19:04:01 | 29.049 |
| 11/4/2010 21:49:01 | 27.1753 | 11/5/2010 19:24:01 | 29.049 |
| 11/4/2010 22:09:01 | 27.1753 | 11/5/2010 19:44:01 | 29.049 |
| 11/4/2010 22:29:01 | 27.1753 | 11/5/2010 20:04:01 | 29.111 |
| 11/4/2010 22:49:01 | 27.1753 | 11/5/2010 20:24:01 | 29.111 |
| 11/4/2010 23:09:01 | 27.1753 | 11/5/2010 20:44:01 | 29.111 |
| 11/4/2010 23:29:01 | 27.1753 | 11/5/2010 21:04:01 | 29.174 |
| 11/4/2010 23:49:01 | 27.1753 | 11/5/2010 21:24:01 | 29.174 |
| 11/5/2010 00:09:01 | 27.1123 | 11/5/2010 21:44:01 | 29.174 |
| 11/5/2010 00:29:01 | 27.1123 | 11/5/2010 22:04:01 | 29.236 |
| 11/5/2010 00:49:01 | 27.1123 | 11/5/2010 22:24:01 | 29.236 |
| 11/5/2010 01:09:01 | 27.1123 | 11/5/2010 22:44:01 | 29.236 |
| 11/5/2010 01:29:01 | 27.1123 | 11/5/2010 23:04:01 | 29.236 |
| 11/5/2010 01:49:01 | 27.1123 | 11/5/2010 23:24:01 | 29.236 |
| 11/5/2010 02:09:01 | 27.1123 | 11/5/2010 23:44:01 | 29.298 |
| 11/5/2010 02:29:01 | 27.0503 | 11/6/2010 00:04:01 | 29.298 |
| 11/5/2010 02:49:01 | 27.0503 | 11/6/2010 00:24:01 | 29.298 |
| 11/5/2010 03:09:01 | 27.0503 | 11/6/2010 00:44:01 | 29.298 |
| 11/5/2010 03:29:01 | 27.0503 | 11/6/2010 01:04:01 | 29.298 |
| 11/5/2010 03:49:01 | 26.9873 | 11/6/2010 01:24:01 | 29.298 |



|                    |         |                    |        |
|--------------------|---------|--------------------|--------|
| 11/5/2010 04:09:01 | 26.9873 | 11/6/2010 01:44:01 | 29.298 |
| 11/5/2010 04:29:01 | 26.9253 | 11/6/2010 02:04:01 | 29.298 |
| 11/5/2010 04:49:01 | 26.9253 | 11/6/2010 02:24:01 | 29.298 |
| 11/5/2010 05:09:01 | 26.9253 | 11/6/2010 02:44:01 | 29.298 |
| 11/5/2010 05:29:01 | 26.9253 | 11/6/2010 03:04:01 | 29.298 |
| 11/5/2010 05:49:01 | 26.9253 | 11/6/2010 03:24:01 | 29.298 |
| 11/5/2010 06:09:01 | 26.8623 | 11/6/2010 03:44:01 | 29.298 |
| 11/5/2010 06:29:01 | 26.8623 | 11/6/2010 04:04:01 | 29.298 |
| 11/5/2010 06:49:01 | 26.8003 | 11/6/2010 04:24:01 | 29.298 |
| 11/5/2010 07:09:01 | 26.8003 | 11/6/2010 04:44:01 | 29.298 |
| 11/5/2010 07:29:01 | 26.8003 | 11/6/2010 05:04:01 | 29.298 |
| 11/5/2010 07:49:01 | 26.7383 | 11/6/2010 05:24:01 | 29.298 |
| 11/5/2010 08:09:01 | 26.7383 | 11/6/2010 05:44:01 | 29.236 |
| 11/5/2010 08:29:01 | 26.7383 | 11/6/2010 06:04:01 | 29.236 |
| 11/5/2010 08:49:01 | 26.6753 | 11/6/2010 06:24:01 | 29.236 |
| 11/5/2010 09:09:01 | 26.6753 | 11/6/2010 06:44:01 | 29.236 |
| 11/5/2010 09:29:01 | 26.6133 | 11/6/2010 07:04:01 | 29.236 |
| 11/5/2010 09:49:01 | 26.6133 | 11/6/2010 07:24:01 | 29.174 |
| 11/5/2010 10:09:01 | 26.6133 | 11/6/2010 07:44:01 | 29.174 |
| 11/5/2010 10:29:01 | 26.5503 | 11/6/2010 08:04:01 | 29.174 |
| 11/5/2010 10:49:01 | 26.5503 | 11/6/2010 08:24:01 | 29.111 |
| 11/5/2010 11:09:01 | 26.5503 | 11/6/2010 08:44:01 | 29.111 |
| 11/5/2010 11:29:01 | 26.5503 | 11/6/2010 09:04:01 | 29.111 |
| 11/5/2010 11:49:01 | 26.5503 | 11/6/2010 09:24:01 | 29.049 |
| 11/5/2010 12:09:01 | 26.5503 | 11/6/2010 09:44:01 | 29.049 |
| 11/5/2010 12:29:01 | 26.5503 | 11/6/2010 10:04:01 | 29.049 |
| 11/5/2010 12:49:01 | 26.5503 | 11/6/2010 10:24:01 | 28.986 |
| 11/5/2010 13:09:01 | 26.5503 | 11/6/2010 10:44:01 | 28.986 |
| 11/5/2010 13:29:01 | 26.5503 | 11/6/2010 11:04:01 | 28.986 |
| 11/5/2010 13:49:01 | 26.5503 | 11/6/2010 11:24:01 | 28.986 |
| 11/5/2010 14:09:01 | 26.5503 | 11/6/2010 11:44:01 | 28.924 |
| 11/5/2010 14:29:01 | 26.5503 | 11/6/2010 12:04:01 | 28.924 |
| 11/5/2010 14:49:01 | 26.6133 | 11/6/2010 12:24:01 | 28.861 |
| 11/5/2010 15:09:01 | 26.6133 | 11/6/2010 12:44:01 | 28.861 |
| 11/5/2010 15:29:01 | 26.6753 | 11/6/2010 13:04:01 | 28.861 |
| 11/5/2010 15:49:01 | 26.6753 | 11/6/2010 13:24:01 | 28.861 |
| 11/5/2010 16:09:01 | 26.6753 | 11/6/2010 13:44:01 | 28.861 |
| 11/5/2010 16:29:01 | 26.7383 | 11/6/2010 14:04:01 | 28.861 |
| 11/5/2010 16:49:01 | 26.7383 | 11/6/2010 14:24:01 | 28.799 |
| 11/5/2010 17:09:01 | 26.7383 | 11/6/2010 14:44:01 | 28.799 |
| 11/5/2010 17:29:01 | 26.8003 | 11/6/2010 15:04:01 | 28.861 |
| 11/5/2010 17:49:01 | 26.8003 | 11/6/2010 15:24:01 | 28.861 |
| 11/5/2010 18:09:01 | 26.8003 | 11/6/2010 15:44:01 | 28.861 |
| 11/5/2010 18:29:01 | 26.8623 | 11/6/2010 16:04:01 | 28.861 |
| 11/5/2010 18:49:01 | 26.8623 | 11/6/2010 16:24:01 | 28.924 |
| 11/5/2010 19:09:01 | 26.8623 | 11/6/2010 16:44:01 | 28.924 |
| 11/5/2010 19:29:01 | 26.9253 | 11/6/2010 17:04:01 | 28.924 |
| 11/5/2010 19:49:01 | 26.9253 | 11/6/2010 17:24:01 | 28.924 |
| 11/5/2010 20:09:01 | 26.9253 | 11/6/2010 17:44:01 | 28.986 |
| 11/5/2010 20:29:01 | 26.9253 | 11/6/2010 18:04:01 | 28.986 |

|                    |         |                    |        |
|--------------------|---------|--------------------|--------|
| 11/5/2010 20:49:01 | 26.9253 | 11/6/2010 18:24:01 | 29.049 |
| 11/5/2010 21:09:01 | 26.9253 | 11/6/2010 18:44:01 | 29.049 |
| 11/5/2010 21:29:01 | 26.9873 | 11/6/2010 19:04:01 | 29.111 |
| 11/5/2010 21:49:01 | 26.9873 | 11/6/2010 19:24:01 | 29.111 |
| 11/5/2010 22:09:01 | 26.9873 | 11/6/2010 19:44:01 | 29.111 |
| 11/5/2010 22:29:01 | 26.9873 | 11/6/2010 20:04:01 | 29.174 |
| 11/5/2010 22:49:01 | 26.9873 | 11/6/2010 20:24:01 | 29.174 |
| 11/5/2010 23:09:01 | 26.9253 | 11/6/2010 20:44:01 | 29.236 |
| 11/5/2010 23:29:01 | 26.9253 | 11/6/2010 21:04:01 | 29.236 |
| 11/5/2010 23:49:01 | 26.9253 | 11/6/2010 21:24:01 | 29.298 |
| 11/6/2010 00:09:01 | 26.9253 | 11/6/2010 21:44:01 | 29.298 |
| 11/6/2010 00:29:01 | 26.9253 | 11/6/2010 22:04:01 | 29.298 |
| 11/6/2010 00:49:01 | 26.9253 | 11/6/2010 22:24:01 | 29.361 |
| 11/6/2010 01:09:01 | 26.9253 | 11/6/2010 22:44:01 | 29.361 |
| 11/6/2010 01:29:01 | 26.9253 | 11/6/2010 23:04:01 | 29.361 |
| 11/6/2010 01:49:01 | 26.9253 | 11/6/2010 23:24:01 | 29.361 |
| 11/6/2010 02:09:01 | 26.8623 | 11/6/2010 23:44:01 | 29.423 |
| 11/6/2010 02:29:01 | 26.8623 | 11/7/2010 00:04:01 | 29.423 |
| 11/6/2010 02:49:01 | 26.8623 | 11/7/2010 00:24:01 | 29.423 |
| 11/6/2010 03:09:01 | 26.8623 | 11/7/2010 00:44:01 | 29.423 |
| 11/6/2010 03:29:01 | 26.8003 | 11/7/2010 01:04:01 | 29.423 |
| 11/6/2010 03:49:01 | 26.8003 | 11/7/2010 01:24:01 | 29.423 |
| 11/6/2010 04:09:01 | 26.8003 | 11/7/2010 01:44:01 | 29.486 |
| 11/6/2010 04:29:01 | 26.8003 | 11/7/2010 02:04:01 | 29.486 |
| 11/6/2010 04:49:01 | 26.7383 | 11/7/2010 02:24:01 | 29.486 |
| 11/6/2010 05:09:01 | 26.7383 | 11/7/2010 02:44:01 | 29.486 |
| 11/6/2010 05:29:01 | 26.7383 | 11/7/2010 03:04:01 | 29.486 |
| 11/6/2010 05:49:01 | 26.6753 | 11/7/2010 03:24:01 | 29.486 |
| 11/6/2010 06:09:01 | 26.6753 | 11/7/2010 03:44:01 | 29.486 |
| 11/6/2010 06:29:01 | 26.6753 | 11/7/2010 04:04:01 | 29.423 |
| 11/6/2010 06:49:01 | 26.6133 | 11/7/2010 04:24:01 | 29.423 |
| 11/6/2010 07:09:01 | 26.6133 | 11/7/2010 04:44:01 | 29.423 |
| 11/6/2010 07:29:01 | 26.6133 | 11/7/2010 05:04:01 | 29.423 |
| 11/6/2010 07:49:01 | 26.5503 | 11/7/2010 05:24:01 | 29.423 |
| 11/6/2010 08:09:01 | 26.5503 | 11/7/2010 05:44:01 | 29.423 |
| 11/6/2010 08:29:01 | 26.4883 | 11/7/2010 06:04:01 | 29.423 |
| 11/6/2010 08:49:01 | 26.4883 | 11/7/2010 06:24:01 | 29.423 |
| 11/6/2010 09:09:01 | 26.4883 | 11/7/2010 06:44:01 | 29.361 |
| 11/6/2010 09:29:01 | 26.4253 | 11/7/2010 07:04:01 | 29.361 |
| 11/6/2010 09:49:01 | 26.4253 | 11/7/2010 07:24:01 | 29.361 |
| 11/6/2010 10:09:01 | 26.4253 | 11/7/2010 07:44:01 | 29.361 |
| 11/6/2010 10:29:01 | 26.4253 | 11/7/2010 08:04:01 | 29.361 |
| 11/6/2010 10:49:01 | 26.3633 | 11/7/2010 08:24:01 | 29.298 |
| 11/6/2010 11:09:01 | 26.3633 | 11/7/2010 08:44:01 | 29.298 |
| 11/6/2010 11:29:01 | 26.3633 | 11/7/2010 09:04:01 | 29.298 |
| 11/6/2010 11:49:01 | 26.3633 | 11/7/2010 09:24:01 | 29.236 |
| 11/6/2010 12:09:01 | 26.3633 | 11/7/2010 09:44:01 | 29.236 |
| 11/6/2010 12:29:01 | 26.3633 | 11/7/2010 10:04:01 | 29.236 |
| 11/6/2010 12:49:01 | 26.3633 | 11/7/2010 10:24:01 | 29.236 |
| 11/6/2010 13:09:01 | 26.3633 | 11/7/2010 10:44:01 | 29.174 |

|                    |         |                    |        |
|--------------------|---------|--------------------|--------|
| 11/6/2010 13:29:01 | 26.4253 | 11/7/2010 11:04:01 | 29.174 |
| 11/6/2010 13:49:01 | 26.4253 | 11/7/2010 11:24:01 | 29.174 |
| 11/6/2010 14:09:01 | 26.4253 | 11/7/2010 11:44:01 | 29.111 |
| 11/6/2010 14:29:01 | 26.4883 | 11/7/2010 12:04:01 | 29.111 |
| 11/6/2010 14:49:01 | 26.4883 | 11/7/2010 12:24:01 | 29.111 |
| 11/6/2010 15:09:01 | 26.4883 | 11/7/2010 12:44:01 | 29.049 |
| 11/6/2010 15:29:01 | 26.5503 | 11/7/2010 13:04:01 | 29.049 |
| 11/6/2010 15:49:01 | 26.5503 | 11/7/2010 13:24:01 | 29.049 |
| 11/6/2010 16:09:01 | 26.6133 | 11/7/2010 13:44:01 | 29.049 |
| 11/6/2010 16:29:01 | 26.6133 | 11/7/2010 14:04:01 | 29.049 |
| 11/6/2010 16:49:01 | 26.6753 | 11/7/2010 14:24:01 | 29.049 |
| 11/6/2010 17:09:01 | 26.6753 | 11/7/2010 14:44:01 | 29.049 |
| 11/6/2010 17:29:01 | 26.7383 | 11/7/2010 15:04:01 | 29.049 |
| 11/6/2010 17:49:01 | 26.7383 | 11/7/2010 15:24:01 | 29.049 |
| 11/6/2010 18:09:01 | 26.8003 | 11/7/2010 15:44:01 | 29.049 |
| 11/6/2010 18:29:01 | 26.8003 | 11/7/2010 16:04:01 | 29.111 |
| 11/6/2010 18:49:01 | 26.8623 | 11/7/2010 16:24:01 | 29.111 |
| 11/6/2010 19:09:01 | 26.8623 | 11/7/2010 16:44:01 | 29.111 |
| 11/6/2010 19:29:01 | 26.8623 | 11/7/2010 17:04:01 | 29.174 |
| 11/6/2010 19:49:01 | 26.9253 | 11/7/2010 17:24:01 | 29.174 |
| 11/6/2010 20:09:01 | 26.9253 | 11/7/2010 17:44:01 | 29.174 |
| 11/6/2010 20:29:01 | 26.9253 | 11/7/2010 18:04:01 | 29.236 |
| 11/6/2010 20:49:01 | 26.9253 | 11/7/2010 18:24:01 | 29.236 |
| 11/6/2010 21:09:01 | 26.9253 | 11/7/2010 18:44:01 | 29.298 |
| 11/6/2010 21:29:01 | 26.9253 | 11/7/2010 19:04:01 | 29.298 |
| 11/6/2010 21:49:01 | 26.9873 | 11/7/2010 19:24:01 | 29.361 |
| 11/6/2010 22:09:01 | 26.9873 | 11/7/2010 19:44:01 | 29.361 |
| 11/6/2010 22:29:01 | 26.9873 | 11/7/2010 20:04:01 | 29.361 |
| 11/6/2010 22:49:01 | 26.9873 | 11/7/2010 20:24:01 | 29.423 |
| 11/6/2010 23:09:01 | 26.9253 | 11/7/2010 20:44:01 | 29.423 |
| 11/6/2010 23:29:01 | 26.9253 | 11/7/2010 21:04:01 | 29.486 |
| 11/6/2010 23:49:01 | 26.9253 | 11/7/2010 21:24:01 | 29.486 |
| 11/7/2010 00:09:01 | 26.9253 | 11/7/2010 21:44:01 | 29.548 |
| 11/7/2010 00:29:01 | 26.9253 | 11/7/2010 22:04:01 | 29.548 |
| 11/7/2010 00:49:01 | 26.9253 | 11/7/2010 22:24:01 | 29.548 |
| 11/7/2010 01:09:01 | 26.9253 | 11/7/2010 22:44:01 | 29.61  |
| 11/7/2010 01:29:01 | 26.9253 | 11/7/2010 23:04:01 | 29.61  |
| 11/7/2010 01:49:01 | 26.9253 | 11/7/2010 23:24:01 | 29.61  |
| 11/7/2010 02:09:01 | 26.9253 | 11/7/2010 23:44:01 | 29.61  |
| 11/7/2010 02:29:01 | 26.8623 | 11/8/2010 00:04:01 | 29.673 |
| 11/7/2010 02:49:01 | 26.8623 | 11/8/2010 00:24:01 | 29.673 |
| 11/7/2010 03:09:01 | 26.8623 | 11/8/2010 00:44:01 | 29.673 |
| 11/7/2010 03:29:01 | 26.8623 | 11/8/2010 01:04:01 | 29.673 |
| 11/7/2010 03:49:01 | 26.8623 | 11/8/2010 01:24:01 | 29.735 |
| 11/7/2010 04:09:01 | 26.8003 | 11/8/2010 01:44:01 | 29.735 |
| 11/7/2010 04:29:01 | 26.8003 | 11/8/2010 02:04:01 | 29.735 |
| 11/7/2010 04:49:01 | 26.8003 | 11/8/2010 02:24:01 | 29.735 |
| 11/7/2010 05:09:01 | 26.8003 | 11/8/2010 02:44:01 | 29.735 |
| 11/7/2010 05:29:01 | 26.7383 | 11/8/2010 03:04:01 | 29.735 |
| 11/7/2010 05:49:01 | 26.7383 | 11/8/2010 03:24:01 | 29.735 |

|                    |         |                    |        |
|--------------------|---------|--------------------|--------|
| 11/7/2010 06:09:01 | 26.7383 | 11/8/2010 03:44:01 | 29.735 |
| 11/7/2010 06:29:01 | 26.7383 | 11/8/2010 04:04:01 | 29.735 |
| 11/7/2010 06:49:01 | 26.6753 | 11/8/2010 04:24:01 | 29.735 |
| 11/7/2010 07:09:01 | 26.6753 | 11/8/2010 04:44:01 | 29.735 |
| 11/7/2010 07:29:01 | 26.6753 | 11/8/2010 05:04:01 | 29.735 |
| 11/7/2010 07:49:01 | 26.6133 | 11/8/2010 05:24:01 | 29.735 |
| 11/7/2010 08:09:01 | 26.6133 | 11/8/2010 05:44:01 | 29.735 |
| 11/7/2010 08:29:01 | 26.6133 | 11/8/2010 06:04:01 | 29.673 |
| 11/7/2010 08:49:01 | 26.5503 | 11/8/2010 06:24:01 | 29.673 |
| 11/7/2010 09:09:01 | 26.5503 | 11/8/2010 06:44:01 | 29.673 |
| 11/7/2010 09:29:01 | 26.5503 | 11/8/2010 07:04:01 | 29.673 |
| 11/7/2010 09:49:01 | 26.4883 | 11/8/2010 07:24:01 | 29.673 |
| 11/7/2010 10:09:01 | 26.4883 | 11/8/2010 07:44:01 | 29.673 |
| 11/7/2010 10:29:01 | 26.4883 | 11/8/2010 08:04:01 | 29.61  |
| 11/7/2010 10:49:01 | 26.4883 | 11/8/2010 08:24:01 | 29.61  |
| 11/7/2010 11:09:01 | 26.4883 | 11/8/2010 08:44:01 | 29.61  |
| 11/7/2010 11:29:01 | 26.4883 | 11/8/2010 09:04:01 | 29.61  |
| 11/7/2010 11:49:01 | 26.4883 | 11/8/2010 09:24:01 | 29.548 |
| 11/7/2010 12:09:01 | 26.4883 | 11/8/2010 09:44:01 | 29.548 |
| 11/7/2010 12:29:01 | 26.4883 | 11/8/2010 10:04:01 | 29.548 |
| 11/7/2010 12:49:01 | 26.4883 | 11/8/2010 10:24:01 | 29.548 |
| 11/7/2010 13:09:01 | 26.4883 | 11/8/2010 10:44:01 | 29.486 |
| 11/7/2010 13:29:01 | 26.5503 | 11/8/2010 11:04:01 | 29.486 |
| 11/7/2010 13:49:01 | 26.5503 | 11/8/2010 11:24:01 | 29.486 |
| 11/7/2010 14:09:01 | 26.5503 | 11/8/2010 11:44:01 | 29.423 |
| 11/7/2010 14:29:01 | 26.6133 | 11/8/2010 12:04:01 | 29.423 |
| 11/7/2010 14:49:01 | 26.6133 | 11/8/2010 12:24:01 | 29.423 |
| 11/7/2010 15:09:01 | 26.6133 | 11/8/2010 12:44:01 | 29.423 |
| 11/7/2010 15:29:01 | 26.6753 | 11/8/2010 13:04:01 | 29.361 |
| 11/7/2010 15:49:01 | 26.6753 | 11/8/2010 13:24:01 | 29.361 |
| 11/7/2010 16:09:01 | 26.7383 | 11/8/2010 13:44:01 | 29.361 |
| 11/7/2010 16:29:01 | 26.8003 | 11/8/2010 14:04:01 | 29.361 |
| 11/7/2010 16:49:01 | 26.8003 | 11/8/2010 14:24:01 | 29.361 |
| 11/7/2010 17:09:01 | 26.8623 | 11/8/2010 14:44:01 | 29.361 |
| 11/7/2010 17:29:01 | 26.8623 | 11/8/2010 15:04:01 | 29.361 |
| 11/7/2010 17:49:01 | 26.9253 | 11/8/2010 15:24:01 | 29.361 |
| 11/7/2010 18:09:01 | 26.9253 | 11/8/2010 15:44:01 | 29.361 |
| 11/7/2010 18:29:01 | 26.9873 | 11/8/2010 16:04:01 | 29.361 |
| 11/7/2010 18:49:01 | 26.9873 | 11/8/2010 16:24:01 | 29.423 |
| 11/7/2010 19:09:01 | 26.9873 | 11/8/2010 16:44:01 | 29.423 |
| 11/7/2010 19:29:01 | 27.0503 | 11/8/2010 17:04:01 | 29.486 |
| 11/7/2010 19:49:01 | 27.0503 | 11/8/2010 17:24:01 | 29.486 |
| 11/7/2010 20:09:01 | 27.0503 | 11/8/2010 17:44:01 | 29.486 |
| 11/7/2010 20:29:01 | 27.1123 | 11/8/2010 18:04:01 | 29.548 |
| 11/7/2010 20:49:01 | 27.1123 | 11/8/2010 18:24:01 | 29.548 |
| 11/7/2010 21:09:01 | 27.1123 | 11/8/2010 18:44:01 | 29.61  |
| 11/7/2010 21:29:01 | 27.1123 | 11/8/2010 19:04:01 | 29.61  |
| 11/7/2010 21:49:01 | 27.1123 | 11/8/2010 19:24:01 | 29.61  |
| 11/7/2010 22:09:01 | 27.1753 | 11/8/2010 19:44:01 | 29.673 |
| 11/7/2010 22:29:01 | 27.1753 | 11/8/2010 20:04:01 | 29.673 |

|                    |         |                    |        |
|--------------------|---------|--------------------|--------|
| 11/7/2010 22:49:01 | 27.1753 | 11/8/2010 20:24:01 | 29.735 |
| 11/7/2010 23:09:01 | 27.1753 | 11/8/2010 20:44:01 | 29.735 |
| 11/7/2010 23:29:01 | 27.1753 | 11/8/2010 21:04:01 | 29.735 |
| 11/7/2010 23:49:01 | 27.1753 | 11/8/2010 21:24:01 | 29.798 |
| 11/8/2010 00:09:01 | 27.1753 | 11/8/2010 21:44:01 | 29.798 |
| 11/8/2010 00:29:01 | 27.1753 | 11/8/2010 22:04:01 | 29.798 |
| 11/8/2010 00:49:01 | 27.1753 | 11/8/2010 22:24:01 | 29.86  |
| 11/8/2010 01:09:01 | 27.1753 | 11/8/2010 22:44:01 | 29.86  |
| 11/8/2010 01:29:01 | 27.1753 | 11/8/2010 23:04:01 | 29.86  |
| 11/8/2010 01:49:01 | 27.1123 | 11/8/2010 23:24:01 | 29.86  |
| 11/8/2010 02:09:01 | 27.1123 | 11/8/2010 23:44:01 | 29.922 |
| 11/8/2010 02:29:01 | 27.1123 | 11/9/2010 00:04:01 | 29.922 |
| 11/8/2010 02:49:01 | 27.1123 | 11/9/2010 00:24:01 | 29.922 |
| 11/8/2010 03:09:01 | 27.1123 | 11/9/2010 00:44:01 | 29.922 |
| 11/8/2010 03:29:01 | 27.1123 | 11/9/2010 01:04:01 | 29.922 |
| 11/8/2010 03:49:01 | 27.1123 | 11/9/2010 01:24:01 | 29.922 |
| 11/8/2010 04:09:01 | 27.1123 | 11/9/2010 01:44:01 | 29.922 |
| 11/8/2010 04:29:01 | 27.0503 | 11/9/2010 02:04:01 | 29.922 |
| 11/8/2010 04:49:01 | 27.0503 | 11/9/2010 02:24:01 | 29.922 |
| 11/8/2010 05:09:01 | 27.0503 | 11/9/2010 02:44:01 | 29.922 |
| 11/8/2010 05:29:01 | 27.0503 | 11/9/2010 03:04:01 | 29.922 |
| 11/8/2010 05:49:01 | 26.9873 | 11/9/2010 03:24:01 | 29.922 |
| 11/8/2010 06:09:01 | 26.9873 | 11/9/2010 03:44:01 | 29.922 |
| 11/8/2010 06:29:01 | 26.9873 | 11/9/2010 04:04:01 | 29.922 |
| 11/8/2010 06:49:01 | 26.9873 | 11/9/2010 04:24:01 | 29.922 |
| 11/8/2010 07:09:01 | 26.9873 | 11/9/2010 04:44:01 | 29.922 |
| 11/8/2010 07:29:01 | 26.9253 | 11/9/2010 05:04:01 | 29.922 |
| 11/8/2010 07:49:01 | 26.9253 | 11/9/2010 05:24:01 | 29.86  |
| 11/8/2010 08:09:01 | 26.9253 | 11/9/2010 05:44:01 | 29.86  |
| 11/8/2010 08:29:01 | 26.8623 | 11/9/2010 06:04:01 | 29.86  |
| 11/8/2010 08:49:01 | 26.8623 | 11/9/2010 06:24:01 | 29.86  |
| 11/8/2010 09:09:01 | 26.8623 | 11/9/2010 06:44:01 | 29.86  |
| 11/8/2010 09:29:01 | 26.8623 | 11/9/2010 07:04:01 | 29.798 |
| 11/8/2010 09:49:01 | 26.8003 | 11/9/2010 07:24:01 | 29.798 |
| 11/8/2010 10:09:01 | 26.8003 | 11/9/2010 07:44:01 | 29.798 |
| 11/8/2010 10:29:01 | 26.8003 | 11/9/2010 08:04:01 | 29.798 |
| 11/8/2010 10:49:01 | 26.8003 | 11/9/2010 08:24:01 | 29.735 |
| 11/8/2010 11:09:01 | 26.7383 | 11/9/2010 08:44:01 | 29.735 |
| 11/8/2010 11:29:01 | 26.7383 | 11/9/2010 09:04:01 | 29.735 |
| 11/8/2010 11:49:01 | 26.7383 | 11/9/2010 09:24:01 | 29.673 |
| 11/8/2010 12:09:01 | 26.7383 | 11/9/2010 09:44:01 | 29.673 |
| 11/8/2010 12:29:01 | 26.8003 | 11/9/2010 10:04:01 | 29.673 |
| 11/8/2010 12:49:01 | 26.8003 | 11/9/2010 10:24:01 | 29.61  |
| 11/8/2010 13:09:01 | 26.8003 | 11/9/2010 10:44:01 | 29.61  |
| 11/8/2010 13:29:01 | 26.8003 | 11/9/2010 11:04:01 | 29.61  |
| 11/8/2010 13:49:01 | 26.8623 | 11/9/2010 11:24:01 | 29.548 |
| 11/8/2010 14:09:01 | 26.8623 | 11/9/2010 11:44:01 | 29.548 |
| 11/8/2010 14:29:01 | 26.8623 | 11/9/2010 12:04:01 | 29.548 |
| 11/8/2010 14:49:01 | 26.9253 | 11/9/2010 12:24:01 | 29.486 |
| 11/8/2010 15:09:01 | 26.9253 | 11/9/2010 12:44:01 | 29.486 |

|                    |         |                     |        |
|--------------------|---------|---------------------|--------|
| 11/8/2010 15:29:01 | 26.9253 | 11/9/2010 13:04:01  | 29.486 |
| 11/8/2010 15:49:01 | 26.9873 | 11/9/2010 13:24:01  | 29.486 |
| 11/8/2010 16:09:01 | 26.9873 | 11/9/2010 13:44:01  | 29.486 |
| 11/8/2010 16:29:01 | 27.0503 | 11/9/2010 14:04:01  | 29.423 |
| 11/8/2010 16:49:01 | 27.0503 | 11/9/2010 14:24:01  | 29.423 |
| 11/8/2010 17:09:01 | 27.1123 | 11/9/2010 14:44:01  | 29.423 |
| 11/8/2010 17:29:01 | 27.1123 | 11/9/2010 15:04:01  | 29.423 |
| 11/8/2010 17:49:01 | 27.1753 | 11/9/2010 15:24:01  | 29.423 |
| 11/8/2010 18:09:01 | 27.1753 | 11/9/2010 15:44:01  | 29.486 |
| 11/8/2010 18:29:01 | 27.2373 | 11/9/2010 16:04:01  | 29.486 |
| 11/8/2010 18:49:01 | 27.2373 | 11/9/2010 16:24:01  | 29.486 |
| 11/8/2010 19:09:01 | 27.2373 | 11/9/2010 16:44:01  | 29.486 |
| 11/8/2010 19:29:01 | 27.3003 | 11/9/2010 17:04:01  | 29.548 |
| 11/8/2010 19:49:01 | 27.3003 | 11/9/2010 17:24:01  | 29.548 |
| 11/8/2010 20:09:01 | 27.3003 | 11/9/2010 17:44:01  | 29.548 |
| 11/8/2010 20:29:01 | 27.3003 | 11/9/2010 18:04:01  | 29.61  |
| 11/8/2010 20:49:01 | 27.3003 | 11/9/2010 18:24:01  | 29.61  |
| 11/8/2010 21:09:01 | 27.3623 | 11/9/2010 18:44:01  | 29.61  |
| 11/8/2010 21:29:01 | 27.3003 | 11/9/2010 19:04:01  | 29.673 |
| 11/8/2010 21:49:01 | 27.3623 | 11/9/2010 19:24:01  | 29.673 |
| 11/8/2010 22:09:01 | 27.3623 | 11/9/2010 19:44:01  | 29.735 |
| 11/8/2010 22:29:01 | 27.3623 | 11/9/2010 20:04:01  | 29.735 |
| 11/8/2010 22:49:01 | 27.3003 | 11/9/2010 20:24:01  | 29.735 |
| 11/8/2010 23:09:01 | 27.3623 | 11/9/2010 20:44:01  | 29.798 |
| 11/8/2010 23:29:01 | 27.3003 | 11/9/2010 21:04:01  | 29.798 |
| 11/8/2010 23:49:01 | 27.3003 | 11/9/2010 21:24:01  | 29.86  |
| 11/9/2010 00:09:01 | 27.3003 | 11/9/2010 21:44:01  | 29.86  |
| 11/9/2010 00:29:01 | 27.3003 | 11/9/2010 22:04:01  | 29.86  |
| 11/9/2010 00:49:01 | 27.3003 | 11/9/2010 22:24:01  | 29.86  |
| 11/9/2010 01:09:01 | 27.3003 | 11/9/2010 22:44:01  | 29.922 |
| 11/9/2010 01:29:01 | 27.3003 | 11/9/2010 23:04:01  | 29.922 |
| 11/9/2010 01:49:01 | 27.3003 | 11/9/2010 23:24:01  | 29.922 |
| 11/9/2010 02:09:01 | 27.3003 | 11/9/2010 23:44:01  | 29.922 |
| 11/9/2010 02:29:01 | 27.2373 | 11/10/2010 00:04:01 | 29.985 |
| 11/9/2010 02:49:01 | 27.2373 | 11/10/2010 00:24:01 | 29.985 |
| 11/9/2010 03:09:01 | 27.2373 | 11/10/2010 00:44:01 | 29.985 |
| 11/9/2010 03:29:01 | 27.2373 | 11/10/2010 01:04:01 | 29.985 |
| 11/9/2010 03:49:01 | 27.1753 | 11/10/2010 01:24:01 | 29.985 |
| 11/9/2010 04:09:01 | 27.1753 | 11/10/2010 01:44:01 | 29.985 |
| 11/9/2010 04:29:01 | 27.1753 | 11/10/2010 02:04:01 | 29.985 |
| 11/9/2010 04:49:01 | 27.1753 | 11/10/2010 02:24:01 | 29.985 |
| 11/9/2010 05:09:01 | 27.1123 | 11/10/2010 02:44:01 | 29.985 |
| 11/9/2010 05:29:01 | 27.1123 | 11/10/2010 03:04:01 | 29.985 |
| 11/9/2010 05:49:01 | 27.1123 | 11/10/2010 03:24:01 | 29.985 |
| 11/9/2010 06:09:01 | 27.1123 | 11/10/2010 03:44:01 | 29.985 |
| 11/9/2010 06:29:01 | 27.0503 | 11/10/2010 04:04:01 | 29.985 |
| 11/9/2010 06:49:01 | 27.0503 | 11/10/2010 04:24:01 | 29.985 |
| 11/9/2010 07:09:01 | 27.0503 | 11/10/2010 04:44:01 | 29.985 |
| 11/9/2010 07:29:01 | 27.0503 | 11/10/2010 05:04:01 | 29.922 |
| 11/9/2010 07:49:01 | 26.9873 | 11/10/2010 05:24:01 | 29.922 |

|                     |         |                     |        |
|---------------------|---------|---------------------|--------|
| 11/9/2010 08:09:01  | 26.9873 | 11/10/2010 05:44:01 | 29.922 |
| 11/9/2010 08:29:01  | 26.9873 | 11/10/2010 06:04:01 | 29.922 |
| 11/9/2010 08:49:01  | 26.9253 | 11/10/2010 06:24:01 | 29.922 |
| 11/9/2010 09:09:01  | 26.9253 | 11/10/2010 06:44:01 | 29.86  |
| 11/9/2010 09:29:01  | 26.9253 | 11/10/2010 07:04:01 | 29.86  |
| 11/9/2010 09:49:01  | 26.9253 | 11/10/2010 07:24:01 | 29.86  |
| 11/9/2010 10:09:01  | 26.8623 | 11/10/2010 07:44:01 | 29.86  |
| 11/9/2010 10:29:01  | 26.8623 | 11/10/2010 08:04:01 | 29.798 |
| 11/9/2010 10:49:01  | 26.8623 | 11/10/2010 08:24:01 | 29.798 |
| 11/9/2010 11:09:01  | 26.8623 | 11/10/2010 08:44:01 | 29.735 |
| 11/9/2010 11:29:01  | 26.8623 | 11/10/2010 09:04:01 | 29.735 |
| 11/9/2010 11:49:01  | 26.8623 | 11/10/2010 09:24:01 | 29.735 |
| 11/9/2010 12:09:01  | 26.8623 | 11/10/2010 09:44:01 | 29.735 |
| 11/9/2010 12:29:01  | 26.8623 | 11/10/2010 10:04:01 | 29.673 |
| 11/9/2010 12:49:01  | 26.8623 | 11/10/2010 10:24:01 | 29.673 |
| 11/9/2010 13:09:01  | 26.8623 | 11/10/2010 10:44:01 | 29.61  |
| 11/9/2010 13:29:01  | 26.8623 | 11/10/2010 11:04:01 | 29.61  |
| 11/9/2010 13:49:01  | 26.9253 | 11/10/2010 11:24:01 | 29.61  |
| 11/9/2010 14:09:01  | 26.9253 | 11/10/2010 11:44:01 | 29.548 |
| 11/9/2010 14:29:01  | 26.9253 | 11/10/2010 12:04:01 | 29.548 |
| 11/9/2010 14:49:01  | 26.9873 | 11/10/2010 12:24:01 | 29.548 |
| 11/9/2010 15:09:01  | 26.9873 | 11/10/2010 12:44:01 | 29.486 |
| 11/9/2010 15:29:01  | 26.9873 | 11/10/2010 13:04:01 | 29.486 |
| 11/9/2010 15:49:01  | 27.0503 | 11/10/2010 13:24:01 | 29.486 |
| 11/9/2010 16:09:01  | 27.1123 | 11/10/2010 13:44:01 | 29.486 |
| 11/9/2010 16:29:01  | 27.1123 | 11/10/2010 14:04:01 | 29.423 |
| 11/9/2010 16:49:01  | 27.1753 | 11/10/2010 14:24:01 | 29.423 |
| 11/9/2010 17:09:01  | 27.1753 | 11/10/2010 14:44:01 | 29.423 |
| 11/9/2010 17:29:01  | 27.2373 | 11/10/2010 15:04:01 | 29.423 |
| 11/9/2010 17:49:01  | 27.2373 | 11/10/2010 15:24:01 | 29.423 |
| 11/9/2010 18:09:01  | 27.3003 | 11/10/2010 15:44:01 | 29.486 |
| 11/9/2010 18:29:01  | 27.3003 | 11/10/2010 16:04:01 | 29.486 |
| 11/9/2010 18:49:01  | 27.3623 | 11/10/2010 16:24:01 | 29.486 |
| 11/9/2010 19:09:01  | 27.3623 | 11/10/2010 16:44:01 | 29.486 |
| 11/9/2010 19:29:01  | 27.3623 | 11/10/2010 17:04:01 | 29.548 |
| 11/9/2010 19:49:01  | 27.3623 | 11/10/2010 17:24:01 | 29.548 |
| 11/9/2010 20:09:01  | 27.4253 | 11/10/2010 17:44:01 | 29.61  |
| 11/9/2010 20:29:01  | 27.4253 | 11/10/2010 18:04:01 | 29.61  |
| 11/9/2010 20:49:01  | 27.4253 | 11/10/2010 18:24:01 | 29.61  |
| 11/9/2010 21:09:01  | 27.4253 | 11/10/2010 18:44:01 | 29.673 |
| 11/9/2010 21:29:01  | 27.4253 | 11/10/2010 19:04:01 | 29.673 |
| 11/9/2010 21:49:01  | 27.4253 | 11/10/2010 19:24:01 | 29.735 |
| 11/9/2010 22:09:01  | 27.4253 | 11/10/2010 19:44:01 | 29.735 |
| 11/9/2010 22:29:01  | 27.4253 | 11/10/2010 20:04:01 | 29.735 |
| 11/9/2010 22:49:01  | 27.4253 | 11/10/2010 20:24:01 | 29.798 |
| 11/9/2010 23:09:01  | 27.4253 | 11/10/2010 20:44:01 | 29.798 |
| 11/9/2010 23:29:01  | 27.4253 | 11/10/2010 21:04:01 | 29.798 |
| 11/9/2010 23:49:01  | 27.4253 | 11/10/2010 21:24:01 | 29.86  |
| 11/10/2010 00:09:01 | 27.4253 | 11/10/2010 21:44:01 | 29.86  |
| 11/10/2010 00:29:01 | 27.4253 | 11/10/2010 22:04:01 | 29.922 |

|                     |         |                     |        |
|---------------------|---------|---------------------|--------|
| 11/10/2010 00:49:01 | 27.4253 | 11/10/2010 22:24:01 | 29.922 |
| 11/10/2010 01:09:01 | 27.4253 | 11/10/2010 22:44:01 | 29.922 |
| 11/10/2010 01:29:01 | 27.3623 | 11/10/2010 23:04:01 | 29.922 |
| 11/10/2010 01:49:01 | 27.3623 | 11/10/2010 23:24:01 | 29.922 |
| 11/10/2010 02:09:01 | 27.3623 | 11/10/2010 23:44:01 | 29.985 |
| 11/10/2010 02:29:01 | 27.3623 | 11/11/2010 00:04:01 | 29.985 |
| 11/10/2010 02:49:01 | 27.3623 | 11/11/2010 00:24:01 | 29.985 |
| 11/10/2010 03:09:01 | 27.3003 | 11/11/2010 00:44:01 | 29.985 |
| 11/10/2010 03:29:01 | 27.3003 | 11/11/2010 01:04:01 | 29.985 |
| 11/10/2010 03:49:01 | 27.3003 | 11/11/2010 01:24:01 | 29.985 |
| 11/10/2010 04:09:01 | 27.2373 | 11/11/2010 01:44:01 | 29.985 |
| 11/10/2010 04:29:01 | 27.2373 | 11/11/2010 02:04:01 | 29.985 |
| 11/10/2010 04:49:01 | 27.2373 | 11/11/2010 02:24:01 | 29.985 |
| 11/10/2010 05:09:01 | 27.2373 | 11/11/2010 02:44:01 | 29.985 |
| 11/10/2010 05:29:01 | 27.1753 | 11/11/2010 03:04:01 | 29.985 |
| 11/10/2010 05:49:01 | 27.1753 | 11/11/2010 03:24:01 | 29.985 |
| 11/10/2010 06:09:01 | 27.1753 | 11/11/2010 03:44:01 | 29.985 |
| 11/10/2010 06:29:01 | 27.1123 | 11/11/2010 04:04:01 | 29.985 |
| 11/10/2010 06:49:01 | 27.1123 | 11/11/2010 04:24:01 | 29.922 |
| 11/10/2010 07:09:01 | 27.0503 | 11/11/2010 04:44:01 | 29.922 |
| 11/10/2010 07:29:01 | 27.0503 | 11/11/2010 05:04:01 | 29.922 |
| 11/10/2010 07:49:01 | 27.0503 | 11/11/2010 05:24:01 | 29.922 |
| 11/10/2010 08:09:01 | 26.9873 | 11/11/2010 05:44:01 | 29.922 |
| 11/10/2010 08:29:01 | 26.9873 | 11/11/2010 06:04:01 | 29.86  |
| 11/10/2010 08:49:01 | 26.9253 | 11/11/2010 06:24:01 | 29.86  |
| 11/10/2010 09:09:01 | 26.9253 | 11/11/2010 06:44:01 | 29.86  |
| 11/10/2010 09:29:01 | 26.9253 | 11/11/2010 07:04:01 | 29.86  |
| 11/10/2010 09:49:01 | 26.8623 | 11/11/2010 07:24:01 | 29.798 |
| 11/10/2010 10:09:01 | 26.8623 | 11/11/2010 07:44:01 | 29.798 |
| 11/10/2010 10:29:01 | 26.8623 | 11/11/2010 08:04:01 | 29.735 |
| 11/10/2010 10:49:01 | 26.8623 | 11/11/2010 08:24:01 | 29.735 |
| 11/10/2010 11:09:01 | 26.8003 | 11/11/2010 08:44:01 | 29.735 |
| 11/10/2010 11:29:01 | 26.8003 | 11/11/2010 09:04:01 | 29.673 |
| 11/10/2010 11:49:01 | 26.8003 | 11/11/2010 09:24:01 | 29.673 |
| 11/10/2010 12:09:01 | 26.8003 | 11/11/2010 09:44:01 | 29.673 |
| 11/10/2010 12:29:01 | 26.8623 | 11/11/2010 10:04:01 | 29.61  |
| 11/10/2010 12:49:01 | 26.8623 | 11/11/2010 10:24:01 | 29.61  |
| 11/10/2010 13:09:01 | 26.8623 | 11/11/2010 10:44:01 | 29.548 |
| 11/10/2010 13:29:01 | 26.8623 | 11/11/2010 11:04:01 | 29.548 |
| 11/10/2010 13:49:01 | 26.8623 | 11/11/2010 11:24:01 | 29.486 |
| 11/10/2010 14:09:01 | 26.9253 | 11/11/2010 11:44:01 | 29.486 |
| 11/10/2010 14:29:01 | 26.9253 | 11/11/2010 12:04:01 | 29.423 |
| 11/10/2010 14:49:01 | 26.9253 | 11/11/2010 12:24:01 | 29.423 |
| 11/10/2010 15:09:01 | 26.9873 | 11/11/2010 12:44:01 | 29.423 |
| 11/10/2010 15:29:01 | 26.9873 | 11/11/2010 13:04:01 | 29.361 |
| 11/10/2010 15:49:01 | 27.0503 | 11/11/2010 13:24:01 | 29.361 |
| 11/10/2010 16:09:01 | 27.1123 | 11/11/2010 13:44:01 | 29.361 |
| 11/10/2010 16:29:01 | 27.1123 | 11/11/2010 14:04:01 | 29.361 |
| 11/10/2010 16:49:01 | 27.1753 | 11/11/2010 14:24:01 | 29.361 |
| 11/10/2010 17:09:01 | 27.1753 | 11/11/2010 14:44:01 | 29.361 |



|                     |         |                     |        |
|---------------------|---------|---------------------|--------|
| 11/10/2010 17:29:01 | 27.2373 | 11/11/2010 15:04:01 | 29.361 |
| 11/10/2010 17:49:01 | 27.2373 | 11/11/2010 15:24:01 | 29.361 |
| 11/10/2010 18:09:01 | 27.3003 | 11/11/2010 15:44:01 | 29.361 |
| 11/10/2010 18:29:01 | 27.3003 | 11/11/2010 16:04:01 | 29.361 |
| 11/10/2010 18:49:01 | 27.3623 | 11/11/2010 16:24:01 | 29.361 |
| 11/10/2010 19:09:01 | 27.3623 | 11/11/2010 16:44:01 | 29.361 |
| 11/10/2010 19:29:01 | 27.3623 | 11/11/2010 17:04:01 | 29.423 |
| 11/10/2010 19:49:01 | 27.3623 | 11/11/2010 17:24:01 | 29.423 |
| 11/10/2010 20:09:01 | 27.4253 | 11/11/2010 17:44:01 | 29.486 |
| 11/10/2010 20:29:01 | 27.4253 | 11/11/2010 18:04:01 | 29.486 |
| 11/10/2010 20:49:01 | 27.4253 | 11/11/2010 18:24:01 | 29.486 |
| 11/10/2010 21:09:01 | 27.4253 | 11/11/2010 18:44:01 | 29.548 |
| 11/10/2010 21:29:01 | 27.4253 | 11/11/2010 19:04:01 | 29.548 |
| 11/10/2010 21:49:01 | 27.4253 | 11/11/2010 19:24:01 | 29.61  |
| 11/10/2010 22:09:01 | 27.4253 | 11/11/2010 19:44:01 | 29.61  |
| 11/10/2010 22:29:01 | 27.4253 | 11/11/2010 20:04:01 | 29.61  |
| 11/10/2010 22:49:01 | 27.4253 | 11/11/2010 20:24:01 | 29.673 |
| 11/10/2010 23:09:01 | 27.4253 | 11/11/2010 20:44:01 | 29.673 |
| 11/10/2010 23:29:01 | 27.4253 | 11/11/2010 21:04:01 | 29.673 |
| 11/10/2010 23:49:01 | 27.4253 | 11/11/2010 21:24:01 | 29.735 |
| 11/11/2010 00:09:01 | 27.4253 | 11/11/2010 21:44:01 | 29.735 |
| 11/11/2010 00:29:01 | 27.3623 | 11/11/2010 22:04:01 | 29.735 |
| 11/11/2010 00:49:01 | 27.3623 | 11/11/2010 22:24:01 | 29.798 |
| 11/11/2010 01:09:01 | 27.3623 | 11/11/2010 22:44:01 | 29.798 |
| 11/11/2010 01:29:01 | 27.3623 | 11/11/2010 23:04:01 | 29.798 |
| 11/11/2010 01:49:01 | 27.3003 | 11/11/2010 23:24:01 | 29.798 |
| 11/11/2010 02:09:01 | 27.3003 | 11/11/2010 23:44:01 | 29.86  |
| 11/11/2010 02:29:01 | 27.3003 | 11/12/2010 00:04:01 | 29.86  |
| 11/11/2010 02:49:01 | 27.2373 | 11/12/2010 00:24:01 | 29.86  |
| 11/11/2010 03:09:01 | 27.2373 | 11/12/2010 00:44:01 | 29.86  |
| 11/11/2010 03:29:01 | 27.2373 | 11/12/2010 01:04:01 | 29.86  |
| 11/11/2010 03:49:01 | 27.1753 | 11/12/2010 01:24:01 | 29.86  |
| 11/11/2010 04:09:01 | 27.1753 | 11/12/2010 01:44:01 | 29.86  |
| 11/11/2010 04:29:01 | 27.1753 | 11/12/2010 02:04:01 | 29.86  |
| 11/11/2010 04:49:01 | 27.1123 | 11/12/2010 02:24:01 | 29.86  |
| 11/11/2010 05:09:01 | 27.1123 | 11/12/2010 02:44:01 | 29.86  |
| 11/11/2010 05:29:01 | 27.0503 | 11/12/2010 03:04:01 | 29.86  |
| 11/11/2010 05:49:01 | 27.0503 | 11/12/2010 03:24:01 | 29.86  |
| 11/11/2010 06:09:01 | 27.0503 | 11/12/2010 03:44:01 | 29.86  |
| 11/11/2010 06:29:01 | 26.9873 | 11/12/2010 04:04:01 | 29.86  |
| 11/11/2010 06:49:01 | 26.9873 | 11/12/2010 04:24:01 | 29.86  |
| 11/11/2010 07:09:01 | 26.9253 | 11/12/2010 04:44:01 | 29.86  |
| 11/11/2010 07:29:01 | 26.9253 | 11/12/2010 05:04:01 | 29.86  |
| 11/11/2010 07:49:01 | 26.8623 | 11/12/2010 05:24:01 | 29.798 |
| 11/11/2010 08:09:01 | 26.8623 | 11/12/2010 05:44:01 | 29.798 |
| 11/11/2010 08:29:01 | 26.8623 | 11/12/2010 06:04:01 | 29.798 |
| 11/11/2010 08:49:01 | 26.8003 | 11/12/2010 06:24:01 | 29.798 |
| 11/11/2010 09:09:01 | 26.8003 | 11/12/2010 06:44:01 | 29.798 |
| 11/11/2010 09:29:01 | 26.7383 | 11/12/2010 07:04:01 | 29.735 |
| 11/11/2010 09:49:01 | 26.7383 | 11/12/2010 07:24:01 | 29.735 |

|                     |         |                     |        |
|---------------------|---------|---------------------|--------|
| 11/11/2010 10:09:01 | 26.7383 | 11/12/2010 07:44:01 | 29.735 |
| 11/11/2010 10:29:01 | 26.7383 | 11/12/2010 08:04:01 | 29.673 |
| 11/11/2010 10:49:01 | 26.6753 | 11/12/2010 08:24:01 | 29.673 |
| 11/11/2010 11:09:01 | 26.6753 | 11/12/2010 08:44:01 | 29.673 |
| 11/11/2010 11:29:01 | 26.6753 | 11/12/2010 09:04:01 | 29.61  |
| 11/11/2010 11:49:01 | 26.6753 | 11/12/2010 09:24:01 | 29.61  |
| 11/11/2010 12:09:01 | 26.6753 | 11/12/2010 09:44:01 | 29.61  |
| 11/11/2010 12:29:01 | 26.6753 | 11/12/2010 10:04:01 | 29.548 |
| 11/11/2010 12:49:01 | 26.6753 | 11/12/2010 10:24:01 | 29.548 |
| 11/11/2010 13:09:01 | 26.6753 | 11/12/2010 10:44:01 | 29.486 |
| 11/11/2010 13:29:01 | 26.7383 | 11/12/2010 11:04:01 | 29.486 |
| 11/11/2010 13:49:01 | 26.7383 | 11/12/2010 11:24:01 | 29.486 |
| 11/11/2010 14:09:01 | 26.7383 | 11/12/2010 11:44:01 | 29.423 |
| 11/11/2010 14:29:01 | 26.8003 | 11/12/2010 12:04:01 | 29.423 |
| 11/11/2010 14:49:01 | 26.8003 | 11/12/2010 12:24:01 | 29.423 |
| 11/11/2010 15:09:01 | 26.8623 | 11/12/2010 12:44:01 | 29.361 |
| 11/11/2010 15:29:01 | 26.8623 | 11/12/2010 13:04:01 | 29.361 |
| 11/11/2010 15:49:01 | 26.9253 | 11/12/2010 13:24:01 | 29.361 |
| 11/11/2010 16:09:01 | 26.9253 | 11/12/2010 13:44:01 | 29.361 |
| 11/11/2010 16:29:01 | 26.9873 | 11/12/2010 14:04:01 | 29.298 |
| 11/11/2010 16:49:01 | 26.9873 | 11/12/2010 14:24:01 | 29.298 |
| 11/11/2010 17:09:01 | 27.0503 | 11/12/2010 14:44:01 | 29.298 |
| 11/11/2010 17:29:01 | 27.0503 | 11/12/2010 15:04:01 | 29.298 |
| 11/11/2010 17:49:01 | 27.1123 | 11/12/2010 15:24:01 | 29.298 |
| 11/11/2010 18:09:01 | 27.1123 | 11/12/2010 15:44:01 | 29.361 |
| 11/11/2010 18:29:01 | 27.1753 | 11/12/2010 16:04:01 | 29.361 |
| 11/11/2010 18:49:01 | 27.1753 | 11/12/2010 16:24:01 | 29.361 |
| 11/11/2010 19:09:01 | 27.2373 | 11/12/2010 16:44:01 | 29.361 |
| 11/11/2010 19:29:01 | 27.2373 | 11/12/2010 17:04:01 | 29.423 |
| 11/11/2010 19:49:01 | 27.2373 | 11/12/2010 17:24:01 | 29.423 |
| 11/11/2010 20:09:01 | 27.2373 | 11/12/2010 17:44:01 | 29.423 |
| 11/11/2010 20:29:01 | 27.3003 | 11/12/2010 18:04:01 | 29.486 |
| 11/11/2010 20:49:01 | 27.3003 | 11/12/2010 18:24:01 | 29.486 |
| 11/11/2010 21:09:01 | 27.3003 | 11/12/2010 18:44:01 | 29.548 |
| 11/11/2010 21:29:01 | 27.3003 | 11/12/2010 19:04:01 | 29.548 |
| 11/11/2010 21:49:01 | 27.3003 | 11/12/2010 19:24:01 | 29.61  |
| 11/11/2010 22:09:01 | 27.3003 | 11/12/2010 19:44:01 | 29.61  |
| 11/11/2010 22:29:01 | 27.3003 | 11/12/2010 20:04:01 | 29.61  |
| 11/11/2010 22:49:01 | 27.3003 | 11/12/2010 20:24:01 | 29.673 |
| 11/11/2010 23:09:01 | 27.3003 | 11/12/2010 20:44:01 | 29.673 |
| 11/11/2010 23:29:01 | 27.3003 | 11/12/2010 21:04:01 | 29.735 |
| 11/11/2010 23:49:01 | 27.3003 | 11/12/2010 21:24:01 | 29.735 |
| 11/12/2010 00:09:01 | 27.3003 | 11/12/2010 21:44:01 | 29.735 |
| 11/12/2010 00:29:01 | 27.3003 | 11/12/2010 22:04:01 | 29.798 |
| 11/12/2010 00:49:01 | 27.3003 | 11/12/2010 22:24:01 | 29.798 |
| 11/12/2010 01:09:01 | 27.2373 | 11/12/2010 22:44:01 | 29.798 |
| 11/12/2010 01:29:01 | 27.2373 | 11/12/2010 23:04:01 | 29.798 |
| 11/12/2010 01:49:01 | 27.2373 | 11/12/2010 23:24:01 | 29.86  |
| 11/12/2010 02:09:01 | 27.2373 | 11/12/2010 23:44:01 | 29.86  |
| 11/12/2010 02:29:01 | 27.2373 | 11/13/2010 00:04:01 | 29.86  |

|                     |         |                     |        |
|---------------------|---------|---------------------|--------|
| 11/12/2010 02:49:01 | 27.1753 | 11/13/2010 00:24:01 | 29.86  |
| 11/12/2010 03:09:01 | 27.1753 | 11/13/2010 00:44:01 | 29.86  |
| 11/12/2010 03:29:01 | 27.1753 | 11/13/2010 01:04:01 | 29.86  |
| 11/12/2010 03:49:01 | 27.1753 | 11/13/2010 01:24:01 | 29.86  |
| 11/12/2010 04:09:01 | 27.1123 | 11/13/2010 01:44:01 | 29.86  |
| 11/12/2010 04:29:01 | 27.1123 | 11/13/2010 02:04:01 | 29.922 |
| 11/12/2010 04:49:01 | 27.1123 | 11/13/2010 02:24:01 | 29.86  |
| 11/12/2010 05:09:01 | 27.0503 | 11/13/2010 02:44:01 | 29.86  |
| 11/12/2010 05:29:01 | 27.0503 | 11/13/2010 03:04:01 | 29.86  |
| 11/12/2010 05:49:01 | 27.0503 | 11/13/2010 03:24:01 | 29.86  |
| 11/12/2010 06:09:01 | 26.9873 | 11/13/2010 03:44:01 | 29.86  |
| 11/12/2010 06:29:01 | 26.9873 | 11/13/2010 04:04:01 | 29.86  |
| 11/12/2010 06:49:01 | 26.9873 | 11/13/2010 04:24:01 | 29.86  |
| 11/12/2010 07:09:01 | 26.9253 | 11/13/2010 04:44:01 | 29.86  |
| 11/12/2010 07:29:01 | 26.9253 | 11/13/2010 05:04:01 | 29.86  |
| 11/12/2010 07:49:01 | 26.8623 | 11/13/2010 05:24:01 | 29.86  |
| 11/12/2010 08:09:01 | 26.8623 | 11/13/2010 05:44:01 | 29.798 |
| 11/12/2010 08:29:01 | 26.8623 | 11/13/2010 06:04:01 | 29.798 |
| 11/12/2010 08:49:01 | 26.8003 | 11/13/2010 06:24:01 | 29.798 |
| 11/12/2010 09:09:01 | 26.8003 | 11/13/2010 06:44:01 | 29.798 |
| 11/12/2010 09:29:01 | 26.7383 | 11/13/2010 07:04:01 | 29.735 |
| 11/12/2010 09:49:01 | 26.7383 | 11/13/2010 07:24:01 | 29.735 |
| 11/12/2010 10:09:01 | 26.7383 | 11/13/2010 07:44:01 | 29.735 |
| 11/12/2010 10:29:01 | 26.7383 | 11/13/2010 08:04:01 | 29.673 |
| 11/12/2010 10:49:01 | 26.6753 | 11/13/2010 08:24:01 | 29.673 |
| 11/12/2010 11:09:01 | 26.6753 | 11/13/2010 08:44:01 | 29.673 |
| 11/12/2010 11:29:01 | 26.6753 | 11/13/2010 09:04:01 | 29.61  |
| 11/12/2010 11:49:01 | 26.6753 | 11/13/2010 09:24:01 | 29.61  |
| 11/12/2010 12:09:01 | 26.6753 | 11/13/2010 09:44:01 | 29.548 |
| 11/12/2010 12:29:01 | 26.6753 | 11/13/2010 10:04:01 | 29.548 |
| 11/12/2010 12:49:01 | 26.6753 | 11/13/2010 10:24:01 | 29.548 |
| 11/12/2010 13:09:01 | 26.7383 | 11/13/2010 10:44:01 | 29.486 |
| 11/12/2010 13:29:01 | 26.7383 | 11/13/2010 11:04:01 | 29.486 |
| 11/12/2010 13:49:01 | 26.7383 | 11/13/2010 11:24:01 | 29.423 |
| 11/12/2010 14:09:01 | 26.8003 | 11/13/2010 11:44:01 | 29.423 |
| 11/12/2010 14:29:01 | 26.8003 | 11/13/2010 12:04:01 | 29.423 |
| 11/12/2010 14:49:01 | 26.8003 | 11/13/2010 12:24:01 | 29.361 |
| 11/12/2010 15:09:01 | 26.8623 | 11/13/2010 12:44:01 | 29.361 |
| 11/12/2010 15:29:01 | 26.9253 | 11/13/2010 13:04:01 | 29.298 |
| 11/12/2010 15:49:01 | 26.9253 | 11/13/2010 13:24:01 | 29.298 |
| 11/12/2010 16:09:01 | 26.9873 | 11/13/2010 13:44:01 | 29.298 |
| 11/12/2010 16:29:01 | 26.9873 | 11/13/2010 14:04:01 | 29.298 |
| 11/12/2010 16:49:01 | 27.0503 | 11/13/2010 14:24:01 | 29.236 |
| 11/12/2010 17:09:01 | 27.1123 | 11/13/2010 14:44:01 | 29.236 |
| 11/12/2010 17:29:01 | 27.1123 | 11/13/2010 15:04:01 | 29.236 |
| 11/12/2010 17:49:01 | 27.1753 | 11/13/2010 15:24:01 | 29.298 |
| 11/12/2010 18:09:01 | 27.1753 | 11/13/2010 15:44:01 | 29.298 |
| 11/12/2010 18:29:01 | 27.2373 | 11/13/2010 16:04:01 | 29.298 |
| 11/12/2010 18:49:01 | 27.2373 | 11/13/2010 16:24:01 | 29.298 |
| 11/12/2010 19:09:01 | 27.3003 | 11/13/2010 16:44:01 | 29.298 |

|                     |         |                     |        |
|---------------------|---------|---------------------|--------|
| 11/12/2010 19:29:01 | 27.3003 | 11/13/2010 17:04:01 | 29.298 |
| 11/12/2010 19:49:01 | 27.3003 | 11/13/2010 17:24:01 | 29.361 |
| 11/12/2010 20:09:01 | 27.3003 | 11/13/2010 17:44:01 | 29.361 |
| 11/12/2010 20:29:01 | 27.3623 | 11/13/2010 18:04:01 | 29.361 |
| 11/12/2010 20:49:01 | 27.3623 | 11/13/2010 18:24:01 | 29.423 |
| 11/12/2010 21:09:01 | 27.3623 | 11/13/2010 18:44:01 | 29.423 |
| 11/12/2010 21:29:01 | 27.3623 | 11/13/2010 19:04:01 | 29.423 |
| 11/12/2010 21:49:01 | 27.3623 | 11/13/2010 19:24:01 | 29.486 |
| 11/12/2010 22:09:01 | 27.3623 | 11/13/2010 19:44:01 | 29.486 |
| 11/12/2010 22:29:01 | 27.3623 | 11/13/2010 20:04:01 | 29.548 |
| 11/12/2010 22:49:01 | 27.3623 | 11/13/2010 20:24:01 | 29.548 |
| 11/12/2010 23:09:01 | 27.3623 | 11/13/2010 20:44:01 | 29.548 |
| 11/12/2010 23:29:01 | 27.3623 | 11/13/2010 21:04:01 | 29.61  |
| 11/12/2010 23:49:01 | 27.3623 | 11/13/2010 21:24:01 | 29.61  |
| 11/13/2010 00:09:01 | 27.3623 | 11/13/2010 21:44:01 | 29.61  |
| 11/13/2010 00:29:01 | 27.3623 | 11/13/2010 22:04:01 | 29.61  |
| 11/13/2010 00:49:01 | 27.3003 | 11/13/2010 22:24:01 | 29.673 |
| 11/13/2010 01:09:01 | 27.3003 | 11/13/2010 22:44:01 | 29.673 |
| 11/13/2010 01:29:01 | 27.3003 | 11/13/2010 23:04:01 | 29.673 |
| 11/13/2010 01:49:01 | 27.3003 | 11/13/2010 23:24:01 | 29.673 |
| 11/13/2010 02:09:01 | 27.3003 | 11/13/2010 23:44:01 | 29.735 |
| 11/13/2010 02:29:01 | 27.2373 | 11/14/2010 00:04:01 | 29.735 |
| 11/13/2010 02:49:01 | 27.2373 | 11/14/2010 00:24:01 | 29.735 |
| 11/13/2010 03:09:01 | 27.2373 | 11/14/2010 00:44:01 | 29.735 |
| 11/13/2010 03:29:01 | 27.1753 | 11/14/2010 01:04:01 | 29.735 |
| 11/13/2010 03:49:01 | 27.1753 | 11/14/2010 01:24:01 | 29.735 |
| 11/13/2010 04:09:01 | 27.1753 | 11/14/2010 01:44:01 | 29.735 |
| 11/13/2010 04:29:01 | 27.1753 | 11/14/2010 02:04:01 | 29.735 |
| 11/13/2010 04:49:01 | 27.1123 | 11/14/2010 02:24:01 | 29.735 |
| 11/13/2010 05:09:01 | 27.1123 | 11/14/2010 02:44:01 | 29.735 |
| 11/13/2010 05:29:01 | 27.0503 | 11/14/2010 03:04:01 | 29.735 |
| 11/13/2010 05:49:01 | 27.0503 | 11/14/2010 03:24:01 | 29.735 |
| 11/13/2010 06:09:01 | 27.0503 | 11/14/2010 03:44:01 | 29.673 |
| 11/13/2010 06:29:01 | 26.9873 | 11/14/2010 04:04:01 | 29.673 |
| 11/13/2010 06:49:01 | 26.9873 | 11/14/2010 04:24:01 | 29.673 |
| 11/13/2010 07:09:01 | 26.9253 | 11/14/2010 04:44:01 | 29.673 |
| 11/13/2010 07:29:01 | 26.9253 | 11/14/2010 05:04:01 | 29.673 |
| 11/13/2010 07:49:01 | 26.9253 | 11/14/2010 05:24:01 | 29.673 |
| 11/13/2010 08:09:01 | 26.8623 | 11/14/2010 05:44:01 | 29.61  |
| 11/13/2010 08:29:01 | 26.8623 | 11/14/2010 06:04:01 | 29.61  |
| 11/13/2010 08:49:01 | 26.8003 | 11/14/2010 06:24:01 | 29.61  |
| 11/13/2010 09:09:01 | 26.8003 | 11/14/2010 06:44:01 | 29.61  |
| 11/13/2010 09:29:01 | 26.7383 | 11/14/2010 07:04:01 | 29.548 |
| 11/13/2010 09:49:01 | 26.7383 | 11/14/2010 07:24:01 | 29.548 |
| 11/13/2010 10:09:01 | 26.6753 | 11/14/2010 07:44:01 | 29.548 |
| 11/13/2010 10:29:01 | 26.6753 | 11/14/2010 08:04:01 | 29.486 |
| 11/13/2010 10:49:01 | 26.6753 | 11/14/2010 08:24:01 | 29.486 |
| 11/13/2010 11:09:01 | 26.6753 | 11/14/2010 08:44:01 | 29.486 |
| 11/13/2010 11:29:01 | 26.6753 | 11/14/2010 09:04:01 | 29.423 |
| 11/13/2010 11:49:01 | 26.6133 | 11/14/2010 09:24:01 | 29.423 |

|                     |         |                     |        |
|---------------------|---------|---------------------|--------|
| 11/13/2010 12:09:01 | 26.6133 | 11/14/2010 09:44:01 | 29.423 |
| 11/13/2010 12:29:01 | 26.6133 | 11/14/2010 10:04:01 | 29.361 |
| 11/13/2010 12:49:01 | 26.6753 | 11/14/2010 10:24:01 | 29.361 |
| 11/13/2010 13:09:01 | 26.6753 | 11/14/2010 10:44:01 | 29.298 |
| 11/13/2010 13:29:01 | 26.6753 | 11/14/2010 11:04:01 | 29.298 |
| 11/13/2010 13:49:01 | 26.6753 | 11/14/2010 11:24:01 | 29.298 |
| 11/13/2010 14:09:01 | 26.7383 | 11/14/2010 11:44:01 | 29.236 |
| 11/13/2010 14:29:01 | 26.7383 | 11/14/2010 12:04:01 | 29.236 |
| 11/13/2010 14:49:01 | 26.8003 | 11/14/2010 12:24:01 | 29.174 |
| 11/13/2010 15:09:01 | 26.8003 | 11/14/2010 12:44:01 | 29.174 |
| 11/13/2010 15:29:01 | 26.8003 | 11/14/2010 13:04:01 | 29.174 |
| 11/13/2010 15:49:01 | 26.8623 | 11/14/2010 13:24:01 | 29.174 |
| 11/13/2010 16:09:01 | 26.9253 | 11/14/2010 13:44:01 | 29.111 |
| 11/13/2010 16:29:01 | 26.9253 | 11/14/2010 14:04:01 | 29.111 |
| 11/13/2010 16:49:01 | 26.9873 | 11/14/2010 14:24:01 | 29.111 |
| 11/13/2010 17:09:01 | 26.9873 | 11/14/2010 14:44:01 | 29.111 |
| 11/13/2010 17:29:01 | 27.0503 | 11/14/2010 15:04:01 | 29.111 |
| 11/13/2010 17:49:01 | 27.0503 | 11/14/2010 15:24:01 | 29.111 |
| 11/13/2010 18:09:01 | 27.1123 | 11/14/2010 15:44:01 | 29.111 |
| 11/13/2010 18:29:01 | 27.1123 | 11/14/2010 16:04:01 | 29.174 |
| 11/13/2010 18:49:01 | 27.1753 | 11/14/2010 16:24:01 | 29.174 |
| 11/13/2010 19:09:01 | 27.1753 | 11/14/2010 16:44:01 | 29.174 |
| 11/13/2010 19:29:01 | 27.1753 | 11/14/2010 17:04:01 | 29.174 |
| 11/13/2010 19:49:01 | 27.2373 | 11/14/2010 17:24:01 | 29.236 |
| 11/13/2010 20:09:01 | 27.2373 | 11/14/2010 17:44:01 | 29.236 |
| 11/13/2010 20:29:01 | 27.2373 | 11/14/2010 18:04:01 | 29.236 |
| 11/13/2010 20:49:01 | 27.2373 | 11/14/2010 18:24:01 | 29.298 |
| 11/13/2010 21:09:01 | 27.2373 | 11/14/2010 18:44:01 | 29.298 |
| 11/13/2010 21:29:01 | 27.2373 | 11/14/2010 19:04:01 | 29.361 |
| 11/13/2010 21:49:01 | 27.2373 | 11/14/2010 19:24:01 | 29.361 |
| 11/13/2010 22:09:01 | 27.2373 | 11/14/2010 19:44:01 | 29.423 |
| 11/13/2010 22:29:01 | 27.2373 | 11/14/2010 20:04:01 | 29.423 |
| 11/13/2010 22:49:01 | 27.2373 | 11/14/2010 20:24:01 | 29.486 |
| 11/13/2010 23:09:01 | 27.2373 | 11/14/2010 20:44:01 | 29.486 |
| 11/13/2010 23:29:01 | 27.2373 | 11/14/2010 21:04:01 | 29.486 |
| 11/13/2010 23:49:01 | 27.2373 | 11/14/2010 21:24:01 | 29.548 |
| 11/14/2010 00:09:01 | 27.2373 | 11/14/2010 21:44:01 | 29.548 |
| 11/14/2010 00:29:01 | 27.1753 | 11/14/2010 22:04:01 | 29.61  |
| 11/14/2010 00:49:01 | 27.1753 | 11/14/2010 22:24:01 | 29.61  |
| 11/14/2010 01:09:01 | 27.1753 | 11/14/2010 22:44:01 | 29.61  |
| 11/14/2010 01:29:01 | 27.1753 | 11/14/2010 23:04:01 | 29.61  |
| 11/14/2010 01:49:01 | 27.1753 | 11/14/2010 23:24:01 | 29.673 |
| 11/14/2010 02:09:01 | 27.1123 | 11/14/2010 23:44:01 | 29.673 |
| 11/14/2010 02:29:01 | 27.1123 | 11/15/2010 00:04:01 | 29.673 |
| 11/14/2010 02:49:01 | 27.1123 | 11/15/2010 00:24:01 | 29.673 |
| 11/14/2010 03:09:01 | 27.0503 | 11/15/2010 00:44:01 | 29.735 |
| 11/14/2010 03:29:01 | 27.0503 | 11/15/2010 01:04:01 | 29.735 |
| 11/14/2010 03:49:01 | 27.0503 | 11/15/2010 01:24:01 | 29.735 |
| 11/14/2010 04:09:01 | 26.9873 | 11/15/2010 01:44:01 | 29.735 |
| 11/14/2010 04:29:01 | 26.9873 | 11/15/2010 02:04:01 | 29.735 |

|                     |         |                     |        |
|---------------------|---------|---------------------|--------|
| 11/14/2010 04:49:01 | 26.9873 | 11/15/2010 02:24:01 | 29.735 |
| 11/14/2010 05:09:01 | 26.9873 | 11/15/2010 02:44:01 | 29.735 |
| 11/14/2010 05:29:01 | 26.9253 | 11/15/2010 03:04:01 | 29.735 |
| 11/14/2010 05:49:01 | 26.9253 | 11/15/2010 03:24:01 | 29.735 |
| 11/14/2010 06:09:01 | 26.8623 | 11/15/2010 03:44:01 | 29.735 |
| 11/14/2010 06:29:01 | 26.8623 | 11/15/2010 04:04:01 | 29.735 |
| 11/14/2010 06:49:01 | 26.8623 | 11/15/2010 04:24:01 | 29.735 |
| 11/14/2010 07:09:01 | 26.8003 | 11/15/2010 04:44:01 | 29.735 |
| 11/14/2010 07:29:01 | 26.8003 | 11/15/2010 05:04:01 | 29.735 |
| 11/14/2010 07:49:01 | 26.7383 | 11/15/2010 05:24:01 | 29.735 |
| 11/14/2010 08:09:01 | 26.7383 | 11/15/2010 05:44:01 | 29.735 |
| 11/14/2010 08:29:01 | 26.6753 | 11/15/2010 06:04:01 | 29.735 |
| 11/14/2010 08:49:01 | 26.6753 | 11/15/2010 06:24:01 | 29.735 |
| 11/14/2010 09:09:01 | 26.6753 | 11/15/2010 06:44:01 | 29.673 |
| 11/14/2010 09:29:01 | 26.6133 | 11/15/2010 07:04:01 | 29.673 |
| 11/14/2010 09:49:01 | 26.6133 | 11/15/2010 07:24:01 | 29.673 |
| 11/14/2010 10:09:01 | 26.6133 | 11/15/2010 07:44:01 | 29.673 |
| 11/14/2010 10:29:01 | 26.5503 | 11/15/2010 08:04:01 | 29.673 |
| 11/14/2010 10:49:01 | 26.5503 | 11/15/2010 08:24:01 | 29.61  |
| 11/14/2010 11:09:01 | 26.5503 | 11/15/2010 08:44:01 | 29.61  |
| 11/14/2010 11:29:01 | 26.5503 | 11/15/2010 09:04:01 | 29.61  |
| 11/14/2010 11:49:01 | 26.5503 | 11/15/2010 09:24:01 | 29.548 |
| 11/14/2010 12:09:01 | 26.5503 | 11/15/2010 09:44:01 | 29.548 |
| 11/14/2010 12:29:01 | 26.5503 | 11/15/2010 10:04:01 | 29.548 |
| 11/14/2010 12:49:01 | 26.5503 | 11/15/2010 10:24:01 | 29.486 |
| 11/14/2010 13:09:01 | 26.5503 | 11/15/2010 10:44:01 | 29.486 |
| 11/14/2010 13:29:01 | 26.5503 | 11/15/2010 11:04:01 | 29.486 |
| 11/14/2010 13:49:01 | 26.6133 | 11/15/2010 11:24:01 | 29.423 |
| 11/14/2010 14:09:01 | 26.6133 | 11/15/2010 11:44:01 | 29.423 |
| 11/14/2010 14:29:01 | 26.6753 | 11/15/2010 12:04:01 | 29.423 |
| 11/14/2010 14:49:01 | 26.6753 | 11/15/2010 12:24:01 | 29.423 |
| 11/14/2010 15:09:01 | 26.7383 | 11/15/2010 12:44:01 | 29.361 |
| 11/14/2010 15:29:01 | 26.8003 | 11/15/2010 13:04:01 | 29.361 |
| 11/14/2010 15:49:01 | 26.8003 | 11/15/2010 13:24:01 | 29.361 |
| 11/14/2010 16:09:01 | 26.8623 | 11/15/2010 13:44:01 | 29.361 |
| 11/14/2010 16:29:01 | 26.9253 | 11/15/2010 14:04:01 | 29.298 |
| 11/14/2010 16:49:01 | 26.9253 | 11/15/2010 14:24:01 | 29.298 |
| 11/14/2010 17:09:01 | 26.9873 | 11/15/2010 14:44:01 | 29.298 |
| 11/14/2010 17:29:01 | 26.9873 | 11/15/2010 15:04:01 | 29.298 |
| 11/14/2010 17:49:01 | 27.0503 | 11/15/2010 15:24:01 | 29.298 |
| 11/14/2010 18:09:01 | 27.1123 | 11/15/2010 15:44:01 | 29.298 |
| 11/14/2010 18:29:01 | 27.1123 | 11/15/2010 16:04:01 | 29.361 |
| 11/14/2010 18:49:01 | 27.1753 | 11/15/2010 16:24:01 | 29.361 |
| 11/14/2010 19:09:01 | 27.1753 | 11/15/2010 16:44:01 | 29.361 |
| 11/14/2010 19:29:01 | 27.2373 | 11/15/2010 17:04:01 | 29.361 |
| 11/14/2010 19:49:01 | 27.2373 | 11/15/2010 17:24:01 | 29.361 |
| 11/14/2010 20:09:01 | 27.2373 | 11/15/2010 17:44:01 | 29.423 |
| 11/14/2010 20:29:01 | 27.3003 | 11/15/2010 18:04:01 | 29.423 |
| 11/14/2010 20:49:01 | 27.3003 | 11/15/2010 18:24:01 | 29.423 |
| 11/14/2010 21:09:01 | 27.3003 | 11/15/2010 18:44:01 | 29.486 |

|                     |         |                     |        |
|---------------------|---------|---------------------|--------|
| 11/14/2010 21:29:01 | 27.3003 | 11/15/2010 19:04:01 | 29.486 |
| 11/14/2010 21:49:01 | 27.3003 | 11/15/2010 19:24:01 | 29.486 |
| 11/14/2010 22:09:01 | 27.3003 | 11/15/2010 19:44:01 | 29.548 |
| 11/14/2010 22:29:01 | 27.3003 | 11/15/2010 20:04:01 | 29.548 |
| 11/14/2010 22:49:01 | 27.3003 | 11/15/2010 20:24:01 | 29.548 |
| 11/14/2010 23:09:01 | 27.3003 | 11/15/2010 20:44:01 | 29.61  |
| 11/14/2010 23:29:01 | 27.3003 | 11/15/2010 21:04:01 | 29.61  |
| 11/14/2010 23:49:01 | 27.3003 | 11/15/2010 21:24:01 | 29.61  |
| 11/15/2010 00:09:01 | 27.3003 | 11/15/2010 21:44:01 | 29.673 |
| 11/15/2010 00:29:01 | 27.3003 | 11/15/2010 22:04:01 | 29.673 |
| 11/15/2010 00:49:01 | 27.3003 | 11/15/2010 22:24:01 | 29.673 |
| 11/15/2010 01:09:01 | 27.3003 | 11/15/2010 22:44:01 | 29.673 |
| 11/15/2010 01:29:01 | 27.3003 | 11/15/2010 23:04:01 | 29.735 |
| 11/15/2010 01:49:01 | 27.3003 | 11/15/2010 23:24:01 | 29.735 |
| 11/15/2010 02:09:01 | 27.3003 | 11/15/2010 23:44:01 | 29.735 |
| 11/15/2010 02:29:01 | 27.3003 | 11/16/2010 00:04:01 | 29.735 |
| 11/15/2010 02:49:01 | 27.2373 | 11/16/2010 00:24:01 | 29.735 |
| 11/15/2010 03:09:01 | 27.2373 | 11/16/2010 00:44:01 | 29.735 |
| 11/15/2010 03:29:01 | 27.2373 | 11/16/2010 01:04:01 | 29.735 |
| 11/15/2010 03:49:01 | 27.2373 | 11/16/2010 01:24:01 | 29.735 |
| 11/15/2010 04:09:01 | 27.2373 | 11/16/2010 01:44:01 | 29.735 |
| 11/15/2010 04:29:01 | 27.1753 | 11/16/2010 02:04:01 | 29.735 |
| 11/15/2010 04:49:01 | 27.1753 | 11/16/2010 02:24:01 | 29.735 |
| 11/15/2010 05:09:01 | 27.1753 | 11/16/2010 02:44:01 | 29.735 |
| 11/15/2010 05:29:01 | 27.1753 | 11/16/2010 03:04:01 | 29.735 |
| 11/15/2010 05:49:01 | 27.1753 | 11/16/2010 03:24:01 | 29.735 |
| 11/15/2010 06:09:01 | 27.1123 | 11/16/2010 03:44:01 | 29.735 |
| 11/15/2010 06:29:01 | 27.1123 | 11/16/2010 04:04:01 | 29.735 |
| 11/15/2010 06:49:01 | 27.1123 | 11/16/2010 04:24:01 | 29.735 |
| 11/15/2010 07:09:01 | 27.0503 | 11/16/2010 04:44:01 | 29.673 |
| 11/15/2010 07:29:01 | 27.0503 | 11/16/2010 05:04:01 | 29.673 |
| 11/15/2010 07:49:01 | 27.0503 | 11/16/2010 05:24:01 | 29.673 |
| 11/15/2010 08:09:01 | 26.9873 | 11/16/2010 05:44:01 | 29.673 |
| 11/15/2010 08:29:01 | 26.9873 | 11/16/2010 06:04:01 | 29.673 |
| 11/15/2010 08:49:01 | 26.9873 | 11/16/2010 06:24:01 | 29.61  |
| 11/15/2010 09:09:01 | 26.9253 | 11/16/2010 06:44:01 | 29.61  |
| 11/15/2010 09:29:01 | 26.9253 | 11/16/2010 07:04:01 | 29.61  |
| 11/15/2010 09:49:01 | 26.9253 | 11/16/2010 07:24:01 | 29.61  |
| 11/15/2010 10:09:01 | 26.8623 | 11/16/2010 07:44:01 | 29.548 |
| 11/15/2010 10:29:01 | 26.8623 | 11/16/2010 08:04:01 | 29.548 |
| 11/15/2010 10:49:01 | 26.8623 | 11/16/2010 08:24:01 | 29.548 |
| 11/15/2010 11:09:01 | 26.8623 | 11/16/2010 08:44:01 | 29.548 |
| 11/15/2010 11:29:01 | 26.8623 | 11/16/2010 09:04:01 | 29.486 |
| 11/15/2010 11:49:01 | 26.8623 | 11/16/2010 09:24:01 | 29.486 |
| 11/15/2010 12:09:01 | 26.8623 | 11/16/2010 09:44:01 | 29.423 |
| 11/15/2010 12:29:01 | 26.8623 | 11/16/2010 10:04:01 | 29.423 |
| 11/15/2010 12:49:01 | 26.8623 | 11/16/2010 10:24:01 | 29.423 |
| 11/15/2010 13:09:01 | 26.8623 | 11/16/2010 10:44:01 | 29.423 |
| 11/15/2010 13:29:01 | 26.8623 | 11/16/2010 11:04:01 | 29.361 |
| 11/15/2010 13:49:01 | 26.8623 | 11/16/2010 11:24:01 | 29.361 |

|                     |         |                     |        |
|---------------------|---------|---------------------|--------|
| 11/15/2010 14:09:01 | 26.9253 | 11/16/2010 11:44:01 | 29.361 |
| 11/15/2010 14:29:01 | 26.9253 | 11/16/2010 12:04:01 | 29.298 |
| 11/15/2010 14:49:01 | 26.9253 | 11/16/2010 12:24:01 | 29.298 |
| 11/15/2010 15:09:01 | 26.9873 | 11/16/2010 12:44:01 | 29.298 |
| 11/15/2010 15:29:01 | 27.0503 | 11/16/2010 13:04:01 | 29.236 |
| 11/15/2010 15:49:01 | 27.0503 | 11/16/2010 13:24:01 | 29.236 |
| 11/15/2010 16:09:01 | 27.1123 | 11/16/2010 13:44:01 | 29.236 |
| 11/15/2010 16:29:01 | 27.1123 | 11/16/2010 14:04:01 | 29.236 |
| 11/15/2010 16:49:01 | 27.1753 | 11/16/2010 14:24:01 | 29.236 |
| 11/15/2010 17:09:01 | 27.1753 | 11/16/2010 14:44:01 | 29.236 |
| 11/15/2010 17:29:01 | 27.2373 | 11/16/2010 15:04:01 | 29.236 |
| 11/15/2010 17:49:01 | 27.3003 | 11/16/2010 15:24:01 | 29.236 |
| 11/15/2010 18:09:01 | 27.3003 | 11/16/2010 15:44:01 | 29.236 |
| 11/15/2010 18:29:01 | 27.3003 | 11/16/2010 16:04:01 | 29.236 |
| 11/15/2010 18:49:01 | 27.3623 | 11/16/2010 16:24:01 | 29.236 |
| 11/15/2010 19:09:01 | 27.3623 | 11/16/2010 16:44:01 | 29.298 |
| 11/15/2010 19:29:01 | 27.4253 | 11/16/2010 17:04:01 | 29.298 |
| 11/15/2010 19:49:01 | 27.4253 | 11/16/2010 17:24:01 | 29.298 |
| 11/15/2010 20:09:01 | 27.4253 | 11/16/2010 17:44:01 | 29.361 |
| 11/15/2010 20:29:01 | 27.4253 | 11/16/2010 18:04:01 | 29.361 |
| 11/15/2010 20:49:01 | 27.4253 | 11/16/2010 18:24:01 | 29.423 |
| 11/15/2010 21:09:01 | 27.4253 | 11/16/2010 18:44:01 | 29.423 |
| 11/15/2010 21:29:01 | 27.4253 | 11/16/2010 19:04:01 | 29.423 |
| 11/15/2010 21:49:01 | 27.4253 | 11/16/2010 19:24:01 | 29.486 |
| 11/15/2010 22:09:01 | 27.4873 | 11/16/2010 19:44:01 | 29.486 |
| 11/15/2010 22:29:01 | 27.4253 | 11/16/2010 20:04:01 | 29.548 |
| 11/15/2010 22:49:01 | 27.4253 | 11/16/2010 20:24:01 | 29.548 |
| 11/15/2010 23:09:01 | 27.4253 | 11/16/2010 20:44:01 | 29.61  |
| 11/15/2010 23:29:01 | 27.4253 | 11/16/2010 21:04:01 | 29.61  |
| 11/15/2010 23:49:01 | 27.4253 | 11/16/2010 21:24:01 | 29.61  |
| 11/16/2010 00:09:01 | 27.4253 | 11/16/2010 21:44:01 | 29.673 |
| 11/16/2010 00:29:01 | 27.3623 | 11/16/2010 22:04:01 | 29.673 |
| 11/16/2010 00:49:01 | 27.3623 | 11/16/2010 22:24:01 | 29.673 |
| 11/16/2010 01:09:01 | 27.3623 | 11/16/2010 22:44:01 | 29.735 |
| 11/16/2010 01:29:01 | 27.3623 | 11/16/2010 23:04:01 | 29.735 |
| 11/16/2010 01:49:01 | 27.3623 | 11/16/2010 23:24:01 | 29.735 |
| 11/16/2010 02:09:01 | 27.3003 | 11/16/2010 23:44:01 | 29.735 |
| 11/16/2010 02:29:01 | 27.3003 | 11/17/2010 00:04:01 | 29.735 |
| 11/16/2010 02:49:01 | 27.3003 | 11/17/2010 00:24:01 | 29.735 |
| 11/16/2010 03:09:01 | 27.2373 | 11/17/2010 00:44:01 | 29.798 |
| 11/16/2010 03:29:01 | 27.2373 | 11/17/2010 01:04:01 | 29.798 |
| 11/16/2010 03:49:01 | 27.2373 | 11/17/2010 01:24:01 | 29.798 |
| 11/16/2010 04:09:01 | 27.2373 | 11/17/2010 01:44:01 | 29.798 |
| 11/16/2010 04:29:01 | 27.1753 | 11/17/2010 02:04:01 | 29.798 |
| 11/16/2010 04:49:01 | 27.1753 | 11/17/2010 02:24:01 | 29.798 |
| 11/16/2010 05:09:01 | 27.1753 | 11/17/2010 02:44:01 | 29.798 |
| 11/16/2010 05:29:01 | 27.1123 | 11/17/2010 03:04:01 | 29.798 |
| 11/16/2010 05:49:01 | 27.1123 | 11/17/2010 03:24:01 | 29.798 |
| 11/16/2010 06:09:01 | 27.1123 | 11/17/2010 03:44:01 | 29.798 |
| 11/16/2010 06:29:01 | 27.1123 | 11/17/2010 04:04:01 | 29.798 |



|                     |         |                     |        |
|---------------------|---------|---------------------|--------|
| 11/16/2010 06:49:01 | 27.0503 | 11/17/2010 04:24:01 | 29.798 |
| 11/16/2010 07:09:01 | 27.0503 | 11/17/2010 04:44:01 | 29.798 |
| 11/16/2010 07:29:01 | 26.9873 | 11/17/2010 05:04:01 | 29.735 |
| 11/16/2010 07:49:01 | 26.9873 | 11/17/2010 05:24:01 | 29.735 |
| 11/16/2010 08:09:01 | 26.9873 | 11/17/2010 05:44:01 | 29.735 |
| 11/16/2010 08:29:01 | 26.9253 | 11/17/2010 06:04:01 | 29.735 |
| 11/16/2010 08:49:01 | 26.9253 | 11/17/2010 06:24:01 | 29.735 |
| 11/16/2010 09:09:01 | 26.9253 | 11/17/2010 06:44:01 | 29.673 |
| 11/16/2010 09:29:01 | 26.8623 | 11/17/2010 07:04:01 | 29.673 |
| 11/16/2010 09:49:01 | 26.8623 | 11/17/2010 07:24:01 | 29.673 |
| 11/16/2010 10:09:01 | 26.8623 | 11/17/2010 07:44:01 | 29.673 |
| 11/16/2010 10:29:01 | 26.8623 | 11/17/2010 08:04:01 | 29.61  |
| 11/16/2010 10:49:01 | 26.8623 | 11/17/2010 08:24:01 | 29.61  |
| 11/16/2010 11:09:01 | 26.8003 | 11/17/2010 08:44:01 | 29.61  |
| 11/16/2010 11:29:01 | 26.8003 | 11/17/2010 09:04:01 | 29.61  |
| 11/16/2010 11:49:01 | 26.8003 | 11/17/2010 09:24:01 | 29.548 |
| 11/16/2010 12:09:01 | 26.8003 | 11/17/2010 09:44:01 | 29.548 |
| 11/16/2010 12:29:01 | 26.8003 | 11/17/2010 10:04:01 | 29.548 |
| 11/16/2010 12:49:01 | 26.8623 | 11/17/2010 10:24:01 | 29.486 |
| 11/16/2010 13:09:01 | 26.8623 | 11/17/2010 10:44:01 | 29.486 |
| 11/16/2010 13:29:01 | 26.8623 | 11/17/2010 11:04:01 | 29.486 |
| 11/16/2010 13:49:01 | 26.8623 | 11/17/2010 11:24:01 | 29.423 |
| 11/16/2010 14:09:01 | 26.9253 | 11/17/2010 11:44:01 | 29.423 |
| 11/16/2010 14:29:01 | 26.9253 | 11/17/2010 12:04:01 | 29.423 |
| 11/16/2010 14:49:01 | 26.9873 | 11/17/2010 12:24:01 | 29.361 |
| 11/16/2010 15:09:01 | 26.9873 | 11/17/2010 12:44:01 | 29.361 |
| 11/16/2010 15:29:01 | 27.0503 | 11/17/2010 13:04:01 | 29.361 |
| 11/16/2010 15:49:01 | 27.1123 | 11/17/2010 13:24:01 | 29.361 |
| 11/16/2010 16:09:01 | 27.1123 | 11/17/2010 13:44:01 | 29.298 |
| 11/16/2010 16:29:01 | 27.1753 | 11/17/2010 14:04:01 | 29.298 |
| 11/16/2010 16:49:01 | 27.2373 | 11/17/2010 14:24:01 | 29.298 |
| 11/16/2010 17:09:01 | 27.2373 | 11/17/2010 14:44:01 | 29.298 |
| 11/16/2010 17:29:01 | 27.3003 | 11/17/2010 15:04:01 | 29.298 |
| 11/16/2010 17:49:01 | 27.3623 | 11/17/2010 15:24:01 | 29.298 |
| 11/16/2010 18:09:01 | 27.3623 | 11/17/2010 15:44:01 | 29.298 |
| 11/16/2010 18:29:01 | 27.4253 | 11/17/2010 16:04:01 | 29.298 |
| 11/16/2010 18:49:01 | 27.4253 | 11/17/2010 16:24:01 | 29.298 |
| 11/16/2010 19:09:01 | 27.4253 | 11/17/2010 16:44:01 | 29.361 |
| 11/16/2010 19:29:01 | 27.4873 | 11/17/2010 17:04:01 | 29.361 |
| 11/16/2010 19:49:01 | 27.4873 | 11/17/2010 17:24:01 | 29.361 |
| 11/16/2010 20:09:01 | 27.4873 | 11/17/2010 17:44:01 | 29.361 |
| 11/16/2010 20:29:01 | 27.5503 | 11/17/2010 18:04:01 | 29.423 |
| 11/16/2010 20:49:01 | 27.5503 | 11/17/2010 18:24:01 | 29.423 |
| 11/16/2010 21:09:01 | 27.5503 | 11/17/2010 18:44:01 | 29.423 |
| 11/16/2010 21:29:01 | 27.5503 | 11/17/2010 19:04:01 | 29.423 |
| 11/16/2010 21:49:01 | 27.5503 | 11/17/2010 19:24:01 | 29.486 |
| 11/16/2010 22:09:01 | 27.5503 | 11/17/2010 19:44:01 | 29.486 |
| 11/16/2010 22:29:01 | 27.5503 | 11/17/2010 20:04:01 | 29.486 |
| 11/16/2010 22:49:01 | 27.5503 | 11/17/2010 20:24:01 | 29.548 |
| 11/16/2010 23:09:01 | 27.5503 | 11/17/2010 20:44:01 | 29.548 |

|                     |         |                     |        |
|---------------------|---------|---------------------|--------|
| 11/16/2010 23:29:01 | 27.5503 | 11/17/2010 21:04:01 | 29.548 |
| 11/16/2010 23:49:01 | 27.4873 | 11/17/2010 21:24:01 | 29.548 |
| 11/17/2010 00:09:01 | 27.4873 | 11/17/2010 21:44:01 | 29.61  |
| 11/17/2010 00:29:01 | 27.4873 | 11/17/2010 22:04:01 | 29.61  |
| 11/17/2010 00:49:01 | 27.4873 | 11/17/2010 22:24:01 | 29.61  |
| 11/17/2010 01:09:01 | 27.4873 | 11/17/2010 22:44:01 | 29.61  |
| 11/17/2010 01:29:01 | 27.4253 | 11/17/2010 23:04:01 | 29.61  |
| 11/17/2010 01:49:01 | 27.4253 | 11/17/2010 23:24:01 | 29.673 |
| 11/17/2010 02:09:01 | 27.4253 | 11/17/2010 23:44:01 | 29.673 |
| 11/17/2010 02:29:01 | 27.4253 | 11/18/2010 00:04:01 | 29.673 |
| 11/17/2010 02:49:01 | 27.3623 | 11/18/2010 00:24:01 | 29.673 |
| 11/17/2010 03:09:01 | 27.3623 | 11/18/2010 00:44:01 | 29.673 |
| 11/17/2010 03:29:01 | 27.3623 | 11/18/2010 01:04:01 | 29.673 |
| 11/17/2010 03:49:01 | 27.3623 | 11/18/2010 01:24:01 | 29.673 |
| 11/17/2010 04:09:01 | 27.3003 | 11/18/2010 01:44:01 | 29.673 |
| 11/17/2010 04:29:01 | 27.3003 | 11/18/2010 02:04:01 | 29.673 |
| 11/17/2010 04:49:01 | 27.3003 | 11/18/2010 02:24:01 | 29.673 |
| 11/17/2010 05:09:01 | 27.2373 | 11/18/2010 02:44:01 | 29.673 |
| 11/17/2010 05:29:01 | 27.2373 | 11/18/2010 03:04:01 | 29.673 |
| 11/17/2010 05:49:01 | 27.2373 | 11/18/2010 03:24:01 | 29.673 |
| 11/17/2010 06:09:01 | 27.1753 | 11/18/2010 03:44:01 | 29.673 |
| 11/17/2010 06:29:01 | 27.1753 | 11/18/2010 04:04:01 | 29.673 |
| 11/17/2010 06:49:01 | 27.1753 | 11/18/2010 04:24:01 | 29.61  |
| 11/17/2010 07:09:01 | 27.1753 | 11/18/2010 04:44:01 | 29.61  |
| 11/17/2010 07:29:01 | 27.1123 | 11/18/2010 05:04:01 | 29.61  |
| 11/17/2010 07:49:01 | 27.1123 | 11/18/2010 05:24:01 | 29.61  |
| 11/17/2010 08:09:01 | 27.1123 | 11/18/2010 05:44:01 | 29.61  |
| 11/17/2010 08:29:01 | 27.0503 | 11/18/2010 06:04:01 | 29.61  |
| 11/17/2010 08:49:01 | 27.0503 | 11/18/2010 06:24:01 | 29.548 |
| 11/17/2010 09:09:01 | 27.0503 | 11/18/2010 06:44:01 | 29.548 |
| 11/17/2010 09:29:01 | 26.9873 | 11/18/2010 07:04:01 | 29.548 |
| 11/17/2010 09:49:01 | 26.9873 | 11/18/2010 07:24:01 | 29.548 |
| 11/17/2010 10:09:01 | 26.9873 | 11/18/2010 07:44:01 | 29.486 |
| 11/17/2010 10:29:01 | 26.9253 | 11/18/2010 08:04:01 | 29.486 |
| 11/17/2010 10:49:01 | 26.9253 | 11/18/2010 08:24:01 | 29.486 |
| 11/17/2010 11:09:01 | 26.9253 | 11/18/2010 08:44:01 | 29.486 |
| 11/17/2010 11:29:01 | 26.9253 | 11/18/2010 09:04:01 | 29.423 |
| 11/17/2010 11:49:01 | 26.9253 | 11/18/2010 09:24:01 | 29.423 |
| 11/17/2010 12:09:01 | 26.9253 | 11/18/2010 09:44:01 | 29.423 |
| 11/17/2010 12:29:01 | 26.9253 | 11/18/2010 10:04:01 | 29.361 |
| 11/17/2010 12:49:01 | 26.9253 | 11/18/2010 10:24:01 | 29.361 |
| 11/17/2010 13:09:01 | 26.9253 | 11/18/2010 10:44:01 | 29.361 |
| 11/17/2010 13:29:01 | 26.9873 | 11/18/2010 11:04:01 | 29.298 |
| 11/17/2010 13:49:01 | 26.9873 | 11/18/2010 11:24:01 | 29.298 |
| 11/17/2010 14:09:01 | 26.9873 | 11/18/2010 11:44:01 | 29.298 |
| 11/17/2010 14:29:01 | 27.0503 | 11/18/2010 12:04:01 | 29.298 |
| 11/17/2010 14:49:01 | 27.0503 | 11/18/2010 12:24:01 | 29.236 |
| 11/17/2010 15:09:01 | 27.1123 | 11/18/2010 12:44:01 | 29.236 |
| 11/17/2010 15:29:01 | 27.1123 | 11/18/2010 13:04:01 | 29.236 |
| 11/17/2010 15:49:01 | 27.1753 | 11/18/2010 13:24:01 | 29.236 |

|                     |         |                     |        |
|---------------------|---------|---------------------|--------|
| 11/17/2010 16:09:01 | 27.1753 | 11/18/2010 13:44:01 | 29.174 |
| 11/17/2010 16:29:01 | 27.1753 | 11/18/2010 14:04:01 | 29.174 |
| 11/17/2010 16:49:01 | 27.2373 | 11/18/2010 14:24:01 | 29.174 |
| 11/17/2010 17:09:01 | 27.2373 | 11/18/2010 14:44:01 | 29.174 |
| 11/17/2010 17:29:01 | 27.3003 | 11/18/2010 15:04:01 | 29.174 |
| 11/17/2010 17:49:01 | 27.3003 | 11/18/2010 15:24:01 | 29.174 |
| 11/17/2010 18:09:01 | 27.3003 | 11/18/2010 15:44:01 | 29.174 |
| 11/17/2010 18:29:01 | 27.3623 | 11/18/2010 16:04:01 | 29.174 |
| 11/17/2010 18:49:01 | 27.3623 | 11/18/2010 16:24:01 | 29.174 |
| 11/17/2010 19:09:01 | 27.3623 | 11/18/2010 16:44:01 | 29.174 |
| 11/17/2010 19:29:01 | 27.3623 | 11/18/2010 17:04:01 | 29.236 |
| 11/17/2010 19:49:01 | 27.4253 | 11/18/2010 17:24:01 | 29.236 |
| 11/17/2010 20:09:01 | 27.4253 | 11/18/2010 17:44:01 | 29.236 |
| 11/17/2010 20:29:01 | 27.4253 | 11/18/2010 18:04:01 | 29.236 |
| 11/17/2010 20:49:01 | 27.4253 | 11/18/2010 18:24:01 | 29.236 |
| 11/17/2010 21:09:01 | 27.4253 | 11/18/2010 18:44:01 | 29.298 |
| 11/17/2010 21:29:01 | 27.4253 | 11/18/2010 19:04:01 | 29.298 |
| 11/17/2010 21:49:01 | 27.4253 | 11/18/2010 19:24:01 | 29.298 |
| 11/17/2010 22:09:01 | 27.4253 | 11/18/2010 19:44:01 | 29.298 |
| 11/17/2010 22:29:01 | 27.4253 | 11/18/2010 20:04:01 | 29.361 |
| 11/17/2010 22:49:01 | 27.4253 | 11/18/2010 20:24:01 | 29.361 |
| 11/17/2010 23:09:01 | 27.4253 | 11/18/2010 20:44:01 | 29.361 |
| 11/17/2010 23:29:01 | 27.4253 | 11/18/2010 21:04:01 | 29.361 |
| 11/17/2010 23:49:01 | 27.4253 | 11/18/2010 21:24:01 | 29.423 |
| 11/18/2010 00:09:01 | 27.4253 | 11/18/2010 21:44:01 | 29.423 |
| 11/18/2010 00:29:01 | 27.4253 | 11/18/2010 22:04:01 | 29.423 |
| 11/18/2010 00:49:01 | 27.3623 | 11/18/2010 22:24:01 | 29.423 |
| 11/18/2010 01:09:01 | 27.3623 | 11/18/2010 22:44:01 | 29.486 |
| 11/18/2010 01:29:01 | 27.3623 | 11/18/2010 23:04:01 | 29.486 |
| 11/18/2010 01:49:01 | 27.3623 | 11/18/2010 23:24:01 | 29.486 |
| 11/18/2010 02:09:01 | 27.3623 | 11/18/2010 23:44:01 | 29.486 |
| 11/18/2010 02:29:01 | 27.3003 | 11/19/2010 00:04:01 | 29.486 |
| 11/18/2010 02:49:01 | 27.3003 | 11/19/2010 00:24:01 | 29.486 |
| 11/18/2010 03:09:01 | 27.3003 | 11/19/2010 00:44:01 | 29.486 |
| 11/18/2010 03:29:01 | 27.3003 | 11/19/2010 01:04:01 | 29.486 |
| 11/18/2010 03:49:01 | 27.3003 | 11/19/2010 01:24:01 | 29.486 |
| 11/18/2010 04:09:01 | 27.2373 | 11/19/2010 01:44:01 | 29.548 |
| 11/18/2010 04:29:01 | 27.2373 | 11/19/2010 02:04:01 | 29.486 |
| 11/18/2010 04:49:01 | 27.2373 | 11/19/2010 02:24:01 | 29.486 |
| 11/18/2010 05:09:01 | 27.1753 | 11/19/2010 02:44:01 | 29.486 |
| 11/18/2010 05:29:01 | 27.1753 | 11/19/2010 03:04:01 | 29.486 |
| 11/18/2010 05:49:01 | 27.1753 | 11/19/2010 03:24:01 | 29.486 |
| 11/18/2010 06:09:01 | 27.1753 | 11/19/2010 03:44:01 | 29.486 |
| 11/18/2010 06:29:01 | 27.1123 | 11/19/2010 04:04:01 | 29.486 |
| 11/18/2010 06:49:01 | 27.1123 | 11/19/2010 04:24:01 | 29.486 |
| 11/18/2010 07:09:01 | 27.1123 | 11/19/2010 04:44:01 | 29.486 |
| 11/18/2010 07:29:01 | 27.1123 | 11/19/2010 05:04:01 | 29.486 |
| 11/18/2010 07:49:01 | 27.0503 | 11/19/2010 05:24:01 | 29.486 |
| 11/18/2010 08:09:01 | 27.0503 | 11/19/2010 05:44:01 | 29.486 |
| 11/18/2010 08:29:01 | 26.9873 | 11/19/2010 06:04:01 | 29.423 |

|                     |         |                     |        |
|---------------------|---------|---------------------|--------|
| 11/18/2010 08:49:01 | 26.9873 | 11/19/2010 06:24:01 | 29.423 |
| 11/18/2010 09:09:01 | 26.9873 | 11/19/2010 06:44:01 | 29.423 |
| 11/18/2010 09:29:01 | 26.9873 | 11/19/2010 07:04:01 | 29.423 |
| 11/18/2010 09:49:01 | 26.9253 | 11/19/2010 07:24:01 | 29.423 |
| 11/18/2010 10:09:01 | 26.9253 | 11/19/2010 07:44:01 | 29.423 |
| 11/18/2010 10:29:01 | 26.9253 | 11/19/2010 08:04:01 | 29.361 |
| 11/18/2010 10:49:01 | 26.9253 | 11/19/2010 08:24:01 | 29.361 |
| 11/18/2010 11:09:01 | 26.9253 | 11/19/2010 08:44:01 | 29.361 |
| 11/18/2010 11:29:01 | 26.9253 | 11/19/2010 09:04:01 | 29.361 |
| 11/18/2010 11:49:01 | 26.9253 | 11/19/2010 09:24:01 | 29.298 |
| 11/18/2010 12:09:01 | 26.9253 | 11/19/2010 09:44:01 | 29.298 |
| 11/18/2010 12:29:01 | 26.9253 | 11/19/2010 10:04:01 | 29.298 |
| 11/18/2010 12:49:01 | 26.9253 | 11/19/2010 10:24:01 | 29.298 |
| 11/18/2010 13:09:01 | 26.9253 | 11/19/2010 10:44:01 | 29.236 |
| 11/18/2010 13:29:01 | 26.9873 | 11/19/2010 11:04:01 | 29.236 |
| 11/18/2010 13:49:01 | 26.9873 | 11/19/2010 11:24:01 | 29.236 |
| 11/18/2010 14:09:01 | 27.0503 | 11/19/2010 11:44:01 | 29.174 |
| 11/18/2010 14:29:01 | 27.0503 | 11/19/2010 12:04:01 | 29.174 |
| 11/18/2010 14:49:01 | 27.0503 | 11/19/2010 12:24:01 | 29.174 |
| 11/18/2010 15:09:01 | 27.1123 | 11/19/2010 12:44:01 | 29.174 |
| 11/18/2010 15:29:01 | 27.1123 | 11/19/2010 13:04:01 | 29.174 |
| 11/18/2010 15:49:01 | 27.1753 | 11/19/2010 13:24:01 | 29.111 |
| 11/18/2010 16:09:01 | 27.1753 | 11/19/2010 13:44:01 | 29.111 |
| 11/18/2010 16:29:01 | 27.2373 | 11/19/2010 14:04:01 | 29.111 |
| 11/18/2010 16:49:01 | 27.2373 | 11/19/2010 14:24:01 | 29.111 |
| 11/18/2010 17:09:01 | 27.3003 | 11/19/2010 14:44:01 | 29.111 |
| 11/18/2010 17:29:01 | 27.3003 | 11/19/2010 15:04:01 | 29.111 |
| 11/18/2010 17:49:01 | 27.3003 | 11/19/2010 15:24:01 | 29.111 |
| 11/18/2010 18:09:01 | 27.3623 | 11/19/2010 15:44:01 | 29.111 |
| 11/18/2010 18:29:01 | 27.3623 | 11/19/2010 16:04:01 | 29.111 |
| 11/18/2010 18:49:01 | 27.4253 | 11/19/2010 16:24:01 | 29.111 |
| 11/18/2010 19:09:01 | 27.4253 | 11/19/2010 16:44:01 | 29.111 |
| 11/18/2010 19:29:01 | 27.4253 | 11/19/2010 17:04:01 | 29.111 |
| 11/18/2010 19:49:01 | 27.4873 | 11/19/2010 17:24:01 | 29.174 |
| 11/18/2010 20:09:01 | 27.4873 | 11/19/2010 17:44:01 | 29.174 |
| 11/18/2010 20:29:01 | 27.4873 | 11/19/2010 18:04:01 | 29.174 |
| 11/18/2010 20:49:01 | 27.5503 | 11/19/2010 18:24:01 | 29.174 |
| 11/18/2010 21:09:01 | 27.5503 | 11/19/2010 18:44:01 | 29.174 |
| 11/18/2010 21:29:01 | 27.5503 | 11/19/2010 19:04:01 | 29.174 |
| 11/18/2010 21:49:01 | 27.5503 | 11/19/2010 19:24:01 | 29.236 |
| 11/18/2010 22:09:01 | 27.5503 | 11/19/2010 19:44:01 | 29.236 |
| 11/18/2010 22:29:01 | 27.5503 | 11/19/2010 20:04:01 | 29.236 |
| 11/18/2010 22:49:01 | 27.5503 | 11/19/2010 20:24:01 | 29.236 |
| 11/18/2010 23:09:01 | 27.5503 | 11/19/2010 20:44:01 | 29.236 |
| 11/18/2010 23:29:01 | 27.5503 | 11/19/2010 21:04:01 | 29.236 |
| 11/18/2010 23:49:01 | 27.5503 | 11/19/2010 21:24:01 | 29.236 |
| 11/19/2010 00:09:01 | 27.5503 | 11/19/2010 21:44:01 | 29.236 |
| 11/19/2010 00:29:01 | 27.5503 | 11/19/2010 22:04:01 | 29.236 |
| 11/19/2010 00:49:01 | 27.5503 | 11/19/2010 22:24:01 | 29.298 |
| 11/19/2010 01:09:01 | 27.4873 | 11/19/2010 22:44:01 | 29.298 |

|                     |         |                     |        |
|---------------------|---------|---------------------|--------|
| 11/19/2010 01:29:01 | 27.4873 | 11/19/2010 23:04:01 | 29.298 |
| 11/19/2010 01:49:01 | 27.4873 | 11/19/2010 23:24:01 | 29.298 |
| 11/19/2010 02:09:01 | 27.4873 | 11/19/2010 23:44:01 | 29.236 |
| 11/19/2010 02:29:01 | 27.4873 | 11/20/2010 00:04:01 | 29.236 |
| 11/19/2010 02:49:01 | 27.4253 | 11/20/2010 00:24:01 | 29.236 |
| 11/19/2010 03:09:01 | 27.4253 | 11/20/2010 00:44:01 | 28.612 |
| 11/19/2010 03:29:01 | 27.4253 | 11/20/2010 01:04:01 | 28.05  |
| 11/19/2010 03:49:01 | 27.4253 | 11/20/2010 01:24:01 | 27.675 |
| 11/19/2010 04:09:01 | 27.4253 | 11/20/2010 01:44:01 | 27.488 |
| 11/19/2010 04:29:01 | 27.3623 | 11/20/2010 02:04:01 | 27.3   |
| 11/19/2010 04:49:01 | 27.3623 | 11/20/2010 02:24:01 | 27.176 |
| 11/19/2010 05:09:01 | 27.3623 | 11/20/2010 02:44:01 | 27.051 |
| 11/19/2010 05:29:01 | 27.3623 | 11/20/2010 03:04:01 | 26.988 |
| 11/19/2010 05:49:01 | 27.3003 | 11/20/2010 03:24:01 | 26.926 |
| 11/19/2010 06:09:01 | 27.3003 | 11/20/2010 03:44:01 | 26.863 |
| 11/19/2010 06:29:01 | 27.3003 | 11/20/2010 04:04:01 | 26.801 |
| 11/19/2010 06:49:01 | 27.3003 | 11/20/2010 04:24:01 | 26.738 |
| 11/19/2010 07:09:01 | 27.3003 | 11/20/2010 04:44:01 | 26.738 |
| 11/19/2010 07:29:01 | 27.2373 | 11/20/2010 05:04:01 | 26.676 |
| 11/19/2010 07:49:01 | 27.2373 | 11/20/2010 05:24:01 | 26.676 |
| 11/19/2010 08:09:01 | 27.2373 | 11/20/2010 05:44:01 | 26.676 |
| 11/19/2010 08:29:01 | 27.1753 | 11/20/2010 06:04:01 | 26.613 |
| 11/19/2010 08:49:01 | 27.1753 | 11/20/2010 06:24:01 | 26.613 |
| 11/19/2010 09:09:01 | 27.1753 | 11/20/2010 06:44:01 | 26.613 |
| 11/19/2010 09:29:01 | 27.1753 | 11/20/2010 07:04:01 | 26.613 |
| 11/19/2010 09:49:01 | 27.1753 | 11/20/2010 07:24:01 | 26.613 |
| 11/19/2010 10:09:01 | 27.1123 | 11/20/2010 07:44:01 | 26.613 |
| 11/19/2010 10:29:01 | 27.1123 | 11/20/2010 08:04:01 | 26.613 |
| 11/19/2010 10:49:01 | 27.1123 | 11/20/2010 08:24:01 | 26.613 |
| 11/19/2010 11:09:01 | 27.1123 | 11/20/2010 08:44:01 | 26.613 |
| 11/19/2010 11:29:01 | 27.1123 | 11/20/2010 09:04:01 | 26.613 |
| 11/19/2010 11:49:01 | 27.1123 | 11/20/2010 09:24:01 | 26.613 |
| 11/19/2010 12:09:01 | 27.1123 | 11/20/2010 09:44:01 | 26.613 |
| 11/19/2010 12:29:01 | 27.1123 | 11/20/2010 10:04:01 | 26.613 |
| 11/19/2010 12:49:01 | 27.1123 | 11/20/2010 10:24:01 | 26.613 |
| 11/19/2010 13:09:01 | 27.1753 | 11/20/2010 10:44:01 | 26.613 |
| 11/19/2010 13:29:01 | 27.1753 | 11/20/2010 11:04:01 | 26.613 |
| 11/19/2010 13:49:01 | 27.1753 | 11/20/2010 11:24:01 | 26.613 |
| 11/19/2010 14:09:01 | 27.2373 | 11/20/2010 11:44:01 | 26.613 |
| 11/19/2010 14:29:01 | 27.2373 | 11/20/2010 12:04:01 | 26.613 |
| 11/19/2010 14:49:01 | 27.2373 | 11/20/2010 12:24:01 | 26.676 |
| 11/19/2010 15:09:01 | 27.3003 | 11/20/2010 12:44:01 | 26.676 |
| 11/19/2010 15:29:01 | 27.3003 | 11/20/2010 13:04:01 | 26.676 |
| 11/19/2010 15:49:01 | 27.3003 | 11/20/2010 13:24:01 | 26.676 |
| 11/19/2010 16:09:01 | 27.3623 | 11/20/2010 13:44:01 | 26.738 |
| 11/19/2010 16:29:01 | 27.3623 | 11/20/2010 14:04:01 | 26.738 |
| 11/19/2010 16:49:01 | 27.3623 | 11/20/2010 14:24:01 | 26.801 |
| 11/19/2010 17:09:01 | 27.4253 | 11/20/2010 14:44:01 | 26.801 |
| 11/19/2010 17:29:01 | 27.4253 | 11/20/2010 15:04:01 | 26.863 |
| 11/19/2010 17:49:01 | 27.4873 | 11/20/2010 15:24:01 | 26.863 |

|                     |         |                     |        |
|---------------------|---------|---------------------|--------|
| 11/19/2010 18:09:01 | 27.4873 | 11/20/2010 15:44:01 | 26.926 |
| 11/19/2010 18:29:01 | 27.4873 | 11/20/2010 16:04:01 | 26.926 |
| 11/19/2010 18:49:01 | 27.4873 | 11/20/2010 16:24:01 | 26.988 |
| 11/19/2010 19:09:01 | 27.4873 | 11/20/2010 16:44:01 | 26.988 |
| 11/19/2010 19:29:01 | 27.4873 | 11/20/2010 17:04:01 | 27.051 |
| 11/19/2010 19:49:01 | 27.4873 | 11/20/2010 17:24:01 | 27.113 |
| 11/19/2010 20:09:01 | 27.5503 | 11/20/2010 17:44:01 | 27.113 |
| 11/19/2010 20:29:01 | 27.4873 | 11/20/2010 18:04:01 | 27.176 |
| 11/19/2010 20:49:01 | 27.4873 | 11/20/2010 18:24:01 | 27.176 |
| 11/19/2010 21:09:01 | 27.5503 | 11/20/2010 18:44:01 | 27.238 |
| 11/19/2010 21:29:01 | 27.4873 | 11/20/2010 19:04:01 | 27.238 |
| 11/19/2010 21:49:01 | 27.4873 | 11/20/2010 19:24:01 | 27.3   |
| 11/19/2010 22:09:01 | 27.4873 | 11/20/2010 19:44:01 | 27.3   |
| 11/19/2010 22:29:01 | 27.4873 | 11/20/2010 20:04:01 | 27.363 |
| 11/19/2010 22:49:01 | 27.4873 | 11/20/2010 20:24:01 | 27.363 |
| 11/19/2010 23:09:01 | 27.4873 | 11/20/2010 20:44:01 | 27.363 |
| 11/19/2010 23:29:01 | 27.4873 | 11/20/2010 21:04:01 | 27.425 |
| 11/19/2010 23:49:01 | 27.4253 | 11/20/2010 21:24:01 | 27.425 |
| 11/20/2010 00:09:01 | 27.4253 | 11/20/2010 21:44:01 | 27.425 |
| 11/20/2010 00:29:01 | 27.4253 | 11/20/2010 22:04:01 | 27.488 |
| 11/20/2010 00:49:01 | 27.4253 | 11/20/2010 22:24:01 | 27.488 |
| 11/20/2010 01:09:01 | 27.3003 | 11/20/2010 22:44:01 | 27.488 |
| 11/20/2010 01:29:01 | 27.0503 | 11/20/2010 23:04:01 | 27.488 |
| 11/20/2010 01:49:01 | 26.8623 | 11/20/2010 23:24:01 | 27.488 |
| 11/20/2010 02:09:01 | 26.8003 | 11/20/2010 23:44:01 | 27.488 |
| 11/20/2010 02:29:01 | 26.6753 | 11/21/2010 00:04:01 | 27.488 |
| 11/20/2010 02:49:01 | 26.5503 | 11/21/2010 00:24:01 | 27.488 |
| 11/20/2010 03:09:01 | 26.4883 | 11/21/2010 00:44:01 | 27.488 |
| 11/20/2010 03:29:01 | 26.4253 | 11/21/2010 01:04:01 | 27.488 |
| 11/20/2010 03:49:01 | 26.3633 | 11/21/2010 01:24:01 | 27.488 |
| 11/20/2010 04:09:01 | 26.3633 | 11/21/2010 01:44:01 | 27.488 |
| 11/20/2010 04:29:01 | 26.3003 | 11/21/2010 02:04:01 | 27.488 |
| 11/20/2010 04:49:01 | 26.2383 | 11/21/2010 02:24:01 | 27.488 |
| 11/20/2010 05:09:01 | 26.2383 | 11/21/2010 02:44:01 | 27.488 |
| 11/20/2010 05:29:01 | 26.1753 | 11/21/2010 03:04:01 | 27.488 |
| 11/20/2010 05:49:01 | 26.1753 | 11/21/2010 03:24:01 | 27.488 |
| 11/20/2010 06:09:01 | 26.1753 | 11/21/2010 03:44:01 | 27.488 |
| 11/20/2010 06:29:01 | 26.1133 | 11/21/2010 04:04:01 | 27.425 |
| 11/20/2010 06:49:01 | 26.1133 | 11/21/2010 04:24:01 | 27.425 |
| 11/20/2010 07:09:01 | 26.1133 | 11/21/2010 04:44:01 | 27.425 |
| 11/20/2010 07:29:01 | 26.0503 | 11/21/2010 05:04:01 | 27.363 |
| 11/20/2010 07:49:01 | 26.0503 | 11/21/2010 05:24:01 | 27.363 |
| 11/20/2010 08:09:01 | 26.0503 | 11/21/2010 05:44:01 | 27.3   |
| 11/20/2010 08:29:01 | 26.0503 | 11/21/2010 06:04:01 | 27.238 |
| 11/20/2010 08:49:01 | 25.9883 | 11/21/2010 06:24:01 | 27.176 |
| 11/20/2010 09:09:01 | 25.9883 | 11/21/2010 06:44:01 | 27.113 |
| 11/20/2010 09:29:01 | 25.9883 | 11/21/2010 07:04:01 | 27.051 |
| 11/20/2010 09:49:01 | 25.9883 | 11/21/2010 07:24:01 | 26.988 |
| 11/20/2010 10:09:01 | 25.9883 | 11/21/2010 07:44:01 | 26.988 |
| 11/20/2010 10:29:01 | 25.9883 | 11/21/2010 08:04:01 | 26.926 |

|                     |         |                     |        |
|---------------------|---------|---------------------|--------|
| 11/20/2010 10:49:01 | 25.9883 | 11/21/2010 08:24:01 | 26.926 |
| 11/20/2010 11:09:01 | 26.0503 | 11/21/2010 08:44:01 | 26.863 |
| 11/20/2010 11:29:01 | 26.0503 | 11/21/2010 09:04:01 | 26.863 |
| 11/20/2010 11:49:01 | 26.0503 | 11/21/2010 09:24:01 | 26.801 |
| 11/20/2010 12:09:01 | 26.1133 | 11/21/2010 09:44:01 | 26.801 |
| 11/20/2010 12:29:01 | 26.1133 | 11/21/2010 10:04:01 | 26.738 |
| 11/20/2010 12:49:01 | 26.1133 | 11/21/2010 10:24:01 | 26.738 |
| 11/20/2010 13:09:01 | 26.1753 | 11/21/2010 10:44:01 | 26.738 |
| 11/20/2010 13:29:01 | 26.2383 | 11/21/2010 11:04:01 | 26.676 |
| 11/20/2010 13:49:01 | 26.2383 | 11/21/2010 11:24:01 | 26.676 |
| 11/20/2010 14:09:01 | 26.3003 | 11/21/2010 11:44:01 | 26.676 |
| 11/20/2010 14:29:01 | 26.3633 | 11/21/2010 12:04:01 | 26.676 |
| 11/20/2010 14:49:01 | 26.3633 | 11/21/2010 12:24:01 | 26.676 |
| 11/20/2010 15:09:01 | 26.4253 | 11/21/2010 12:44:01 | 26.613 |
| 11/20/2010 15:29:01 | 26.4883 | 11/21/2010 13:04:01 | 26.613 |
| 11/20/2010 15:49:01 | 26.4883 | 11/21/2010 13:24:01 | 26.613 |
| 11/20/2010 16:09:01 | 26.5503 | 11/21/2010 13:44:01 | 26.613 |
| 11/20/2010 16:29:01 | 26.6133 | 11/21/2010 14:04:01 | 26.676 |
| 11/20/2010 16:49:01 | 26.6133 | 11/21/2010 14:24:01 | 26.676 |
| 11/20/2010 17:09:01 | 26.6753 | 11/21/2010 14:44:01 | 26.676 |
| 11/20/2010 17:29:01 | 26.6753 | 11/21/2010 15:04:01 | 26.676 |
| 11/20/2010 17:49:01 | 26.7383 | 11/21/2010 15:24:01 | 26.738 |
| 11/20/2010 18:09:01 | 26.7383 | 11/21/2010 15:44:01 | 26.738 |
| 11/20/2010 18:29:01 | 26.7383 | 11/21/2010 16:04:01 | 26.738 |
| 11/20/2010 18:49:01 | 26.8003 | 11/21/2010 16:24:01 | 26.801 |
| 11/20/2010 19:09:01 | 26.8003 | 11/21/2010 16:44:01 | 26.801 |
| 11/20/2010 19:29:01 | 26.8003 | 11/21/2010 17:04:01 | 26.863 |
| 11/20/2010 19:49:01 | 26.8003 | 11/21/2010 17:24:01 | 26.863 |
| 11/20/2010 20:09:01 | 26.8623 | 11/21/2010 17:44:01 | 26.863 |
| 11/20/2010 20:29:01 | 26.8623 | 11/21/2010 18:04:01 | 26.926 |
| 11/20/2010 20:49:01 | 26.8623 | 11/21/2010 18:24:01 | 26.926 |
| 11/20/2010 21:09:01 | 26.8623 | 11/21/2010 18:44:01 | 26.926 |
| 11/20/2010 21:29:01 | 26.8623 | 11/21/2010 19:04:01 | 26.988 |
| 11/20/2010 21:49:01 | 26.8623 | 11/21/2010 19:24:01 | 26.988 |
| 11/20/2010 22:09:01 | 26.8623 | 11/21/2010 19:44:01 | 26.988 |
| 11/20/2010 22:29:01 | 26.8623 | 11/21/2010 20:04:01 | 27.051 |
| 11/20/2010 22:49:01 | 26.8623 | 11/21/2010 20:24:01 | 27.051 |
| 11/20/2010 23:09:01 | 26.8003 | 11/21/2010 20:44:01 | 27.051 |
| 11/20/2010 23:29:01 | 26.8003 | 11/21/2010 21:04:01 | 27.051 |
| 11/20/2010 23:49:01 | 26.8003 | 11/21/2010 21:24:01 | 27.051 |
| 11/21/2010 00:09:01 | 26.8003 | 11/21/2010 21:44:01 | 27.113 |
| 11/21/2010 00:29:01 | 26.8003 | 11/21/2010 22:04:01 | 27.113 |
| 11/21/2010 00:49:01 | 26.8003 | 11/21/2010 22:24:01 | 27.113 |
| 11/21/2010 01:09:01 | 26.8003 | 11/21/2010 22:44:01 | 27.113 |
| 11/21/2010 01:29:01 | 26.7383 | 11/21/2010 23:04:01 | 27.113 |
| 11/21/2010 01:49:01 | 26.7383 | 11/21/2010 23:24:01 | 27.113 |
| 11/21/2010 02:09:01 | 26.7383 | 11/21/2010 23:44:01 | 27.113 |
| 11/21/2010 02:29:01 | 26.7383 | 11/22/2010 00:04:01 | 27.113 |
| 11/21/2010 02:49:01 | 26.7383 | 11/22/2010 00:24:01 | 27.113 |
| 11/21/2010 03:09:01 | 26.7383 | 11/22/2010 00:44:01 | 27.113 |

|                     |         |                     |        |
|---------------------|---------|---------------------|--------|
| 11/21/2010 03:29:01 | 26.6753 | 11/22/2010 01:04:01 | 27.051 |
| 11/21/2010 03:49:01 | 26.6753 | 11/22/2010 01:24:01 | 27.051 |
| 11/21/2010 04:09:01 | 26.6753 | 11/22/2010 01:44:01 | 27.051 |
| 11/21/2010 04:29:01 | 26.6753 | 11/22/2010 02:04:01 | 27.051 |
| 11/21/2010 04:49:01 | 26.6753 | 11/22/2010 02:24:01 | 27.051 |
| 11/21/2010 05:09:01 | 26.6753 | 11/22/2010 02:44:01 | 27.051 |
| 11/21/2010 05:29:01 | 26.6133 | 11/22/2010 03:04:01 | 27.051 |
| 11/21/2010 05:49:01 | 26.6133 | 11/22/2010 03:24:01 | 26.988 |
| 11/21/2010 06:09:01 | 26.6133 | 11/22/2010 03:44:01 | 26.988 |
| 11/21/2010 06:29:01 | 26.5503 | 11/22/2010 04:04:01 | 26.988 |
| 11/21/2010 06:49:01 | 26.5503 | 11/22/2010 04:24:01 | 26.988 |
| 11/21/2010 07:09:01 | 26.4883 | 11/22/2010 04:44:01 | 26.988 |
| 11/21/2010 07:29:01 | 26.4883 | 11/22/2010 05:04:01 | 26.988 |
| 11/21/2010 07:49:01 | 26.4253 | 11/22/2010 05:24:01 | 26.926 |
| 11/21/2010 08:09:01 | 26.4253 | 11/22/2010 05:44:01 | 26.926 |
| 11/21/2010 08:29:01 | 26.3633 | 11/22/2010 06:04:01 | 26.926 |
| 11/21/2010 08:49:01 | 26.3633 | 11/22/2010 06:24:01 | 26.926 |
| 11/21/2010 09:09:01 | 26.3003 | 11/22/2010 06:44:01 | 26.926 |
| 11/21/2010 09:29:01 | 26.3003 | 11/22/2010 07:04:01 | 26.863 |
| 11/21/2010 09:49:01 | 26.3003 | 11/22/2010 07:24:01 | 26.863 |
| 11/21/2010 10:09:01 | 26.2383 | 11/22/2010 07:44:01 | 26.863 |
| 11/21/2010 10:29:01 | 26.2383 | 11/22/2010 08:04:01 | 26.863 |
| 11/21/2010 10:49:01 | 26.2383 | 11/22/2010 08:24:01 | 26.863 |
| 11/21/2010 11:09:01 | 26.2383 | 11/22/2010 08:44:01 | 26.863 |
| 11/21/2010 11:29:01 | 26.2383 | 11/22/2010 09:04:01 | 26.801 |
| 11/21/2010 11:49:01 | 26.2383 | 11/22/2010 09:24:01 | 26.801 |
| 11/21/2010 12:09:01 | 26.2383 | 11/22/2010 09:44:01 | 26.801 |
| 11/21/2010 12:29:01 | 26.2383 | 11/22/2010 10:04:01 | 26.801 |
| 11/21/2010 12:49:01 | 26.2383 | 11/22/2010 10:24:01 | 26.801 |
| 11/21/2010 13:09:01 | 26.2383 | 11/22/2010 10:44:01 | 26.801 |
| 11/21/2010 13:29:01 | 26.2383 | 11/22/2010 11:04:01 | 26.801 |
| 11/21/2010 13:49:01 | 26.3003 | 11/22/2010 11:24:01 | 26.801 |
| 11/21/2010 14:09:01 | 26.3003 | 11/22/2010 11:44:01 | 26.801 |
| 11/21/2010 14:29:01 | 26.3003 | 11/22/2010 12:04:01 | 26.801 |
| 11/21/2010 14:49:01 | 26.3633 | 11/22/2010 12:24:01 | 26.801 |
| 11/21/2010 15:09:01 | 26.3633 | 11/22/2010 12:44:01 | 26.801 |
| 11/21/2010 15:29:01 | 26.3633 | 11/22/2010 13:04:01 | 26.801 |
| 11/21/2010 15:49:01 | 26.4253 | 11/22/2010 13:24:01 | 26.863 |
| 11/21/2010 16:09:01 | 26.4253 | 11/22/2010 13:44:01 | 26.863 |
| 11/21/2010 16:29:01 | 26.4253 | 11/22/2010 14:04:01 | 26.926 |
| 11/21/2010 16:49:01 | 26.4883 | 11/22/2010 14:24:01 | 26.926 |
| 11/21/2010 17:09:01 | 26.4883 | 11/22/2010 14:44:01 | 26.988 |
| 11/21/2010 17:29:01 | 26.5503 | 11/22/2010 15:04:01 | 26.988 |
| 11/21/2010 17:49:01 | 26.5503 | 11/22/2010 15:24:01 | 27.051 |
| 11/21/2010 18:09:01 | 26.5503 | 11/22/2010 15:44:01 | 27.113 |
| 11/21/2010 18:29:01 | 26.5503 | 11/22/2010 16:04:01 | 27.113 |
| 11/21/2010 18:49:01 | 26.6133 | 11/22/2010 16:24:01 | 27.176 |
| 11/21/2010 19:09:01 | 26.6133 | 11/22/2010 16:44:01 | 27.238 |
| 11/21/2010 19:29:01 | 26.6133 | 11/22/2010 17:04:01 | 27.238 |
| 11/21/2010 19:49:01 | 26.6133 | 11/22/2010 17:24:01 | 27.3   |



|                     |         |                     |        |
|---------------------|---------|---------------------|--------|
| 11/21/2010 20:09:01 | 26.6133 | 11/22/2010 17:44:01 | 27.363 |
| 11/21/2010 20:29:01 | 26.6133 | 11/22/2010 18:04:01 | 27.363 |
| 11/21/2010 20:49:01 | 26.6133 | 11/22/2010 18:24:01 | 27.425 |
| 11/21/2010 21:09:01 | 26.6133 | 11/22/2010 18:44:01 | 27.425 |
| 11/21/2010 21:29:01 | 26.6133 | 11/22/2010 19:04:01 | 27.488 |
| 11/21/2010 21:49:01 | 26.6133 | 11/22/2010 19:24:01 | 27.488 |
| 11/21/2010 22:09:01 | 26.6133 | 11/22/2010 19:44:01 | 27.488 |
| 11/21/2010 22:29:01 | 26.6133 | 11/22/2010 20:04:01 | 27.55  |
| 11/21/2010 22:49:01 | 26.6133 | 11/22/2010 20:24:01 | 27.55  |
| 11/21/2010 23:09:01 | 26.5503 | 11/22/2010 20:44:01 | 27.55  |
| 11/21/2010 23:29:01 | 26.5503 | 11/22/2010 21:04:01 | 27.613 |
| 11/21/2010 23:49:01 | 26.5503 | 11/22/2010 21:24:01 | 27.613 |
| 11/22/2010 00:09:01 | 26.5503 | 11/22/2010 21:44:01 | 27.613 |
| 11/22/2010 00:29:01 | 26.5503 | 11/22/2010 22:04:01 | 27.613 |
| 11/22/2010 00:49:01 | 26.4883 | 11/22/2010 22:24:01 | 27.613 |
| 11/22/2010 01:09:01 | 26.4883 | 11/22/2010 22:44:01 | 27.613 |
| 11/22/2010 01:29:01 | 26.4883 | 11/22/2010 23:04:01 | 27.613 |
| 11/22/2010 01:49:01 | 26.4883 | 11/22/2010 23:24:01 | 27.613 |
| 11/22/2010 02:09:01 | 26.4883 | 11/22/2010 23:44:01 | 27.613 |
| 11/22/2010 02:29:01 | 26.4883 | 11/23/2010 00:04:01 | 27.613 |
| 11/22/2010 02:49:01 | 26.4253 | 11/23/2010 00:24:01 | 27.613 |
| 11/22/2010 03:09:01 | 26.4253 | 11/23/2010 00:44:01 | 27.613 |
| 11/22/2010 03:29:01 | 26.4253 | 11/23/2010 01:04:01 | 27.613 |
| 11/22/2010 03:49:01 | 26.4253 | 11/23/2010 01:24:01 | 27.613 |
| 11/22/2010 04:09:01 | 26.4253 | 11/23/2010 01:44:01 | 27.613 |
| 11/22/2010 04:29:01 | 26.3633 | 11/23/2010 02:04:01 | 27.613 |
| 11/22/2010 04:49:01 | 26.3633 | 11/23/2010 02:24:01 | 27.55  |
| 11/22/2010 05:09:01 | 26.3633 | 11/23/2010 02:44:01 | 27.55  |
| 11/22/2010 05:29:01 | 26.3633 | 11/23/2010 03:04:01 | 27.55  |
| 11/22/2010 05:49:01 | 26.3633 | 11/23/2010 03:24:01 | 27.55  |
| 11/22/2010 06:09:01 | 26.3003 | 11/23/2010 03:44:01 | 27.55  |
| 11/22/2010 06:29:01 | 26.3003 | 11/23/2010 04:04:01 | 27.55  |
| 11/22/2010 06:49:01 | 26.3003 | 11/23/2010 04:24:01 | 27.55  |
| 11/22/2010 07:09:01 | 26.3003 | 11/23/2010 04:44:01 | 27.488 |
| 11/22/2010 07:29:01 | 26.3003 | 11/23/2010 05:04:01 | 27.488 |
| 11/22/2010 07:49:01 | 26.2383 | 11/23/2010 05:24:01 | 27.488 |
| 11/22/2010 08:09:01 | 26.2383 | 11/23/2010 05:44:01 | 27.488 |
| 11/22/2010 08:29:01 | 26.2383 | 11/23/2010 06:04:01 | 27.425 |
| 11/22/2010 08:49:01 | 26.2383 | 11/23/2010 06:24:01 | 27.425 |
| 11/22/2010 09:09:01 | 26.2383 | 11/23/2010 06:44:01 | 27.425 |
| 11/22/2010 09:29:01 | 26.2383 | 11/23/2010 07:04:01 | 27.363 |
| 11/22/2010 09:49:01 | 26.2383 | 11/23/2010 07:24:01 | 27.363 |
| 11/22/2010 10:09:01 | 26.2383 | 11/23/2010 07:44:01 | 27.363 |
| 11/22/2010 10:29:01 | 26.2383 | 11/23/2010 08:04:01 | 27.3   |
| 11/22/2010 10:49:01 | 26.2383 | 11/23/2010 08:24:01 | 27.3   |
| 11/22/2010 11:09:01 | 26.2383 | 11/23/2010 08:44:01 | 27.3   |
| 11/22/2010 11:29:01 | 26.3003 | 11/23/2010 09:04:01 | 27.238 |
| 11/22/2010 11:49:01 | 26.3003 | 11/23/2010 09:24:01 | 27.238 |
| 11/22/2010 12:09:01 | 26.3633 | 11/23/2010 09:44:01 | 27.238 |
| 11/22/2010 12:29:01 | 26.3633 | 11/23/2010 10:04:01 | 27.176 |

|                     |         |                     |        |
|---------------------|---------|---------------------|--------|
| 11/22/2010 12:49:01 | 26.4253 | 11/23/2010 10:24:01 | 27.176 |
| 11/22/2010 13:09:01 | 26.4253 | 11/23/2010 10:44:01 | 27.176 |
| 11/22/2010 13:29:01 | 26.4883 | 11/23/2010 11:04:01 | 27.113 |
| 11/22/2010 13:49:01 | 26.5503 | 11/23/2010 11:24:01 | 27.113 |
| 11/22/2010 14:09:01 | 26.5503 | 11/23/2010 11:44:01 | 27.113 |
| 11/22/2010 14:29:01 | 26.6133 | 11/23/2010 12:04:01 | 27.113 |
| 11/22/2010 14:49:01 | 26.6753 | 11/23/2010 12:24:01 | 27.113 |
| 11/22/2010 15:09:01 | 26.7383 | 11/23/2010 12:44:01 | 27.113 |
| 11/22/2010 15:29:01 | 26.8003 | 11/23/2010 13:04:01 | 27.113 |
| 11/22/2010 15:49:01 | 26.8623 | 11/23/2010 13:24:01 | 27.113 |
| 11/22/2010 16:09:01 | 26.8623 | 11/23/2010 13:44:01 | 27.176 |
| 11/22/2010 16:29:01 | 26.9253 | 11/23/2010 14:04:01 | 27.176 |
| 11/22/2010 16:49:01 | 26.9873 | 11/23/2010 14:24:01 | 27.176 |
| 11/22/2010 17:09:01 | 26.9873 | 11/23/2010 14:44:01 | 27.238 |
| 11/22/2010 17:29:01 | 27.0503 | 11/23/2010 15:04:01 | 27.3   |
| 11/22/2010 17:49:01 | 27.0503 | 11/23/2010 15:24:01 | 27.3   |
| 11/22/2010 18:09:01 | 27.1123 | 11/23/2010 15:44:01 | 27.363 |
| 11/22/2010 18:29:01 | 27.1123 | 11/23/2010 16:04:01 | 27.363 |
| 11/22/2010 18:49:01 | 27.1753 | 11/23/2010 16:24:01 | 27.425 |
| 11/22/2010 19:09:01 | 27.1753 | 11/23/2010 16:44:01 | 27.488 |
| 11/22/2010 19:29:01 | 27.1753 | 11/23/2010 17:04:01 | 27.488 |
| 11/22/2010 19:49:01 | 27.1753 | 11/23/2010 17:24:01 | 27.55  |
| 11/22/2010 20:09:01 | 27.1753 | 11/23/2010 17:44:01 | 27.55  |
| 11/22/2010 20:29:01 | 27.1753 | 11/23/2010 18:04:01 | 27.613 |
| 11/22/2010 20:49:01 | 27.1753 | 11/23/2010 18:24:01 | 27.613 |
| 11/22/2010 21:09:01 | 27.2373 | 11/23/2010 18:44:01 | 27.675 |
| 11/22/2010 21:29:01 | 27.1753 | 11/23/2010 19:04:01 | 27.675 |
| 11/22/2010 21:49:01 | 27.1753 | 11/23/2010 19:24:01 | 27.738 |
| 11/22/2010 22:09:01 | 27.1753 | 11/23/2010 19:44:01 | 27.738 |
| 11/22/2010 22:29:01 | 27.1753 | 11/23/2010 20:04:01 | 27.8   |
| 11/22/2010 22:49:01 | 27.1753 | 11/23/2010 20:24:01 | 27.8   |
| 11/22/2010 23:09:01 | 27.1753 | 11/23/2010 20:44:01 | 27.8   |
| 11/22/2010 23:29:01 | 27.1753 | 11/23/2010 21:04:01 | 27.8   |
| 11/22/2010 23:49:01 | 27.1753 | 11/23/2010 21:24:01 | 27.8   |
| 11/23/2010 00:09:01 | 27.1753 | 11/23/2010 21:44:01 | 27.863 |
| 11/23/2010 00:29:01 | 27.1123 | 11/23/2010 22:04:01 | 27.863 |
| 11/23/2010 00:49:01 | 27.1123 | 11/23/2010 22:24:01 | 27.863 |
| 11/23/2010 01:09:01 | 27.1123 | 11/23/2010 22:44:01 | 27.863 |
| 11/23/2010 01:29:01 | 27.1123 | 11/23/2010 23:04:01 | 27.863 |
| 11/23/2010 01:49:01 | 27.1123 | 11/23/2010 23:24:01 | 27.863 |
| 11/23/2010 02:09:01 | 27.1123 | 11/23/2010 23:44:01 | 27.863 |
| 11/23/2010 02:29:01 | 27.0503 | 11/24/2010 00:04:01 | 27.863 |
| 11/23/2010 02:49:01 | 27.0503 | 11/24/2010 00:24:01 | 27.863 |
| 11/23/2010 03:09:01 | 27.0503 | 11/24/2010 00:44:01 | 27.863 |
| 11/23/2010 03:29:01 | 26.9873 | 11/24/2010 01:04:01 | 27.863 |
| 11/23/2010 03:49:01 | 26.9873 | 11/24/2010 01:24:01 | 27.863 |
| 11/23/2010 04:09:01 | 26.9873 | 11/24/2010 01:44:01 | 27.863 |
| 11/23/2010 04:29:01 | 26.9873 | 11/24/2010 02:04:01 | 27.8   |
| 11/23/2010 04:49:01 | 26.9253 | 11/24/2010 02:24:01 | 27.8   |
| 11/23/2010 05:09:01 | 26.9253 | 11/24/2010 02:44:01 | 27.8   |

|                     |         |                     |        |
|---------------------|---------|---------------------|--------|
| 11/23/2010 05:29:01 | 26.9253 | 11/24/2010 03:04:01 | 27.8   |
| 11/23/2010 05:49:01 | 26.9253 | 11/24/2010 03:24:01 | 27.8   |
| 11/23/2010 06:09:01 | 26.8623 | 11/24/2010 03:44:01 | 27.738 |
| 11/23/2010 06:29:01 | 26.8623 | 11/24/2010 04:04:01 | 27.738 |
| 11/23/2010 06:49:01 | 26.8623 | 11/24/2010 04:24:01 | 27.738 |
| 11/23/2010 07:09:01 | 26.8003 | 11/24/2010 04:44:01 | 27.738 |
| 11/23/2010 07:29:01 | 26.8003 | 11/24/2010 05:04:01 | 27.675 |
| 11/23/2010 07:49:01 | 26.8003 | 11/24/2010 05:24:01 | 27.675 |
| 11/23/2010 08:09:01 | 26.7383 | 11/24/2010 05:44:01 | 27.675 |
| 11/23/2010 08:29:01 | 26.7383 | 11/24/2010 06:04:01 | 27.675 |
| 11/23/2010 08:49:01 | 26.7383 | 11/24/2010 06:24:01 | 27.613 |
| 11/23/2010 09:09:01 | 26.6753 | 11/24/2010 06:44:01 | 27.613 |
| 11/23/2010 09:29:01 | 26.6753 | 11/24/2010 07:04:01 | 27.613 |
| 11/23/2010 09:49:01 | 26.6753 | 11/24/2010 07:24:01 | 27.613 |
| 11/23/2010 10:09:01 | 26.6753 | 11/24/2010 07:44:01 | 27.55  |
| 11/23/2010 10:29:01 | 26.6753 | 11/24/2010 08:04:01 | 27.55  |
| 11/23/2010 10:49:01 | 26.6753 | 11/24/2010 08:24:01 | 27.55  |
| 11/23/2010 11:09:01 | 26.6753 | 11/24/2010 08:44:01 | 27.488 |
| 11/23/2010 11:29:01 | 26.6753 | 11/24/2010 09:04:01 | 27.488 |
| 11/23/2010 11:49:01 | 26.6753 | 11/24/2010 09:24:01 | 27.488 |
| 11/23/2010 12:09:01 | 26.6753 | 11/24/2010 09:44:01 | 27.488 |
| 11/23/2010 12:29:01 | 26.7383 | 11/24/2010 10:04:01 | 27.425 |
| 11/23/2010 12:49:01 | 26.7383 | 11/24/2010 10:24:01 | 27.425 |
| 11/23/2010 13:09:01 | 26.8003 | 11/24/2010 10:44:01 | 27.425 |
| 11/23/2010 13:29:01 | 26.8003 | 11/24/2010 11:04:01 | 27.425 |
| 11/23/2010 13:49:01 | 26.8623 | 11/24/2010 11:24:01 | 27.363 |
| 11/23/2010 14:09:01 | 26.9253 | 11/24/2010 11:44:01 | 27.363 |
| 11/23/2010 14:29:01 | 26.9253 | 11/24/2010 12:04:01 | 27.363 |
| 11/23/2010 14:49:01 | 26.9873 | 11/24/2010 12:24:01 | 27.363 |
| 11/23/2010 15:09:01 | 27.0503 | 11/24/2010 12:44:01 | 27.363 |
| 11/23/2010 15:29:01 | 27.1123 | 11/24/2010 13:04:01 | 27.363 |
| 11/23/2010 15:49:01 | 27.1123 | 11/24/2010 13:24:01 | 27.425 |
| 11/23/2010 16:09:01 | 27.1753 | 11/24/2010 13:44:01 | 27.425 |
| 11/23/2010 16:29:01 | 27.2373 | 11/24/2010 14:04:01 | 27.425 |
| 11/23/2010 16:49:01 | 27.2373 | 11/24/2010 14:24:01 | 27.488 |
| 11/23/2010 17:09:01 | 27.3003 | 11/24/2010 14:44:01 | 27.488 |
| 11/23/2010 17:29:01 | 27.3003 | 11/24/2010 15:04:01 | 27.55  |
| 11/23/2010 17:49:01 | 27.3623 | 11/24/2010 15:24:01 | 27.55  |
| 11/23/2010 18:09:01 | 27.3623 | 11/24/2010 15:44:01 | 27.613 |
| 11/23/2010 18:29:01 | 27.4253 | 11/24/2010 16:04:01 | 27.613 |
| 11/23/2010 18:49:01 | 27.4253 | 11/24/2010 16:24:01 | 27.675 |
| 11/23/2010 19:09:01 | 27.4253 | 11/24/2010 16:44:01 | 27.675 |
| 11/23/2010 19:29:01 | 27.4253 | 11/24/2010 17:04:01 | 27.738 |
| 11/23/2010 19:49:01 | 27.4253 | 11/24/2010 17:24:01 | 27.8   |
| 11/23/2010 20:09:01 | 27.4253 | 11/24/2010 17:44:01 | 27.8   |
| 11/23/2010 20:29:01 | 27.4253 | 11/24/2010 18:04:01 | 27.863 |
| 11/23/2010 20:49:01 | 27.4253 | 11/24/2010 18:24:01 | 27.863 |
| 11/23/2010 21:09:01 | 27.4253 | 11/24/2010 18:44:01 | 27.925 |
| 11/23/2010 21:29:01 | 27.4253 | 11/24/2010 19:04:01 | 27.925 |
| 11/23/2010 21:49:01 | 27.4253 | 11/24/2010 19:24:01 | 27.925 |

|                     |         |                     |        |
|---------------------|---------|---------------------|--------|
| 11/23/2010 22:09:01 | 27.4253 | 11/24/2010 19:44:01 | 27.987 |
| 11/23/2010 22:29:01 | 27.4253 | 11/24/2010 20:04:01 | 27.987 |
| 11/23/2010 22:49:01 | 27.4253 | 11/24/2010 20:24:01 | 27.987 |
| 11/23/2010 23:09:01 | 27.3623 | 11/24/2010 20:44:01 | 28.05  |
| 11/23/2010 23:29:01 | 27.3623 | 11/24/2010 21:04:01 | 28.05  |
| 11/23/2010 23:49:01 | 27.3623 | 11/24/2010 21:24:01 | 28.05  |
| 11/24/2010 00:09:01 | 27.3623 | 11/24/2010 21:44:01 | 28.05  |
| 11/24/2010 00:29:01 | 27.3003 | 11/24/2010 22:04:01 | 28.112 |
| 11/24/2010 00:49:01 | 27.3003 | 11/24/2010 22:24:01 | 28.112 |
| 11/24/2010 01:09:01 | 27.3003 | 11/24/2010 22:44:01 | 28.112 |
| 11/24/2010 01:29:01 | 27.3003 | 11/24/2010 23:04:01 | 28.112 |
| 11/24/2010 01:49:01 | 27.3003 | 11/24/2010 23:24:01 | 28.112 |
| 11/24/2010 02:09:01 | 27.2373 | 11/24/2010 23:44:01 | 28.112 |
| 11/24/2010 02:29:01 | 27.2373 | 11/25/2010 00:04:01 | 28.112 |
| 11/24/2010 02:49:01 | 27.2373 | 11/25/2010 00:24:01 | 28.112 |
| 11/24/2010 03:09:01 | 27.1753 | 11/25/2010 00:44:01 | 28.112 |
| 11/24/2010 03:29:01 | 27.1753 | 11/25/2010 01:04:01 | 28.112 |
| 11/24/2010 03:49:01 | 27.1753 | 11/25/2010 01:24:01 | 28.112 |
| 11/24/2010 04:09:01 | 27.1753 | 11/25/2010 01:44:01 | 28.05  |
| 11/24/2010 04:29:01 | 27.1123 | 11/25/2010 02:04:01 | 28.05  |
| 11/24/2010 04:49:01 | 27.1123 | 11/25/2010 02:24:01 | 28.05  |
| 11/24/2010 05:09:01 | 27.1123 | 11/25/2010 02:44:01 | 28.05  |
| 11/24/2010 05:29:01 | 27.0503 | 11/25/2010 03:04:01 | 28.05  |
| 11/24/2010 05:49:01 | 27.0503 | 11/25/2010 03:24:01 | 28.05  |
| 11/24/2010 06:09:01 | 27.0503 | 11/25/2010 03:44:01 | 27.987 |
| 11/24/2010 06:29:01 | 26.9873 | 11/25/2010 04:04:01 | 27.987 |
| 11/24/2010 06:49:01 | 26.9873 | 11/25/2010 04:24:01 | 27.987 |
| 11/24/2010 07:09:01 | 26.9873 | 11/25/2010 04:44:01 | 27.987 |
| 11/24/2010 07:29:01 | 26.9253 | 11/25/2010 05:04:01 | 27.987 |
| 11/24/2010 07:49:01 | 26.9253 | 11/25/2010 05:24:01 | 27.925 |
| 11/24/2010 08:09:01 | 26.9253 | 11/25/2010 05:44:01 | 27.925 |
| 11/24/2010 08:29:01 | 26.9253 | 11/25/2010 06:04:01 | 27.925 |
| 11/24/2010 08:49:01 | 26.8623 | 11/25/2010 06:24:01 | 27.925 |
| 11/24/2010 09:09:01 | 26.8623 | 11/25/2010 06:44:01 | 27.863 |
| 11/24/2010 09:29:01 | 26.8623 | 11/25/2010 07:04:01 | 27.863 |
| 11/24/2010 09:49:01 | 26.8623 | 11/25/2010 07:24:01 | 27.863 |
| 11/24/2010 10:09:01 | 26.8623 | 11/25/2010 07:44:01 | 27.863 |
| 11/24/2010 10:29:01 | 26.8623 | 11/25/2010 08:04:01 | 27.863 |
| 11/24/2010 10:49:01 | 26.8623 | 11/25/2010 08:24:01 | 27.8   |
| 11/24/2010 11:09:01 | 26.8623 | 11/25/2010 08:44:01 | 27.8   |
| 11/24/2010 11:29:01 | 26.8623 | 11/25/2010 09:04:01 | 27.8   |
| 11/24/2010 11:49:01 | 26.8623 | 11/25/2010 09:24:01 | 27.8   |
| 11/24/2010 12:09:01 | 26.8623 | 11/25/2010 09:44:01 | 27.738 |
| 11/24/2010 12:29:01 | 26.9253 | 11/25/2010 10:04:01 | 27.738 |
| 11/24/2010 12:49:01 | 26.9253 | 11/25/2010 10:24:01 | 27.738 |
| 11/24/2010 13:09:01 | 26.9253 | 11/25/2010 10:44:01 | 27.738 |
| 11/24/2010 13:29:01 | 26.9873 | 11/25/2010 11:04:01 | 27.675 |
| 11/24/2010 13:49:01 | 27.0503 | 11/25/2010 11:24:01 | 27.675 |
| 11/24/2010 14:09:01 | 27.0503 | 11/25/2010 11:44:01 | 27.675 |
| 11/24/2010 14:29:01 | 27.1123 | 11/25/2010 12:04:01 | 27.675 |

|                     |         |                     |        |
|---------------------|---------|---------------------|--------|
| 11/24/2010 14:49:01 | 27.1123 | 11/25/2010 12:24:01 | 27.675 |
| 11/24/2010 15:09:01 | 27.1753 | 11/25/2010 12:44:01 | 27.675 |
| 11/24/2010 15:29:01 | 27.2373 | 11/25/2010 13:04:01 | 27.675 |
| 11/24/2010 15:49:01 | 27.2373 | 11/25/2010 13:24:01 | 27.613 |
| 11/24/2010 16:09:01 | 27.3003 | 11/25/2010 13:44:01 | 27.613 |
| 11/24/2010 16:29:01 | 27.3003 | 11/25/2010 14:04:01 | 27.613 |
| 11/24/2010 16:49:01 | 27.3623 | 11/25/2010 14:24:01 | 27.613 |
| 11/24/2010 17:09:01 | 27.3623 | 11/25/2010 14:44:01 | 27.613 |
| 11/24/2010 17:29:01 | 27.4253 | 11/25/2010 15:04:01 | 27.675 |
| 11/24/2010 17:49:01 | 27.4253 | 11/25/2010 15:24:01 | 27.613 |
| 11/24/2010 18:09:01 | 27.4253 | 11/25/2010 15:44:01 | 27.675 |
| 11/24/2010 18:29:01 | 27.4873 | 11/25/2010 16:04:01 | 27.675 |
| 11/24/2010 18:49:01 | 27.4873 | 11/25/2010 16:24:01 | 27.675 |
| 11/24/2010 19:09:01 | 27.4873 | 11/25/2010 16:44:01 | 27.675 |
| 11/24/2010 19:29:01 | 27.4873 | 11/25/2010 17:04:01 | 27.675 |
| 11/24/2010 19:49:01 | 27.5503 | 11/25/2010 17:24:01 | 27.738 |
| 11/24/2010 20:09:01 | 27.5503 | 11/25/2010 17:44:01 | 27.738 |
| 11/24/2010 20:29:01 | 27.5503 | 11/25/2010 18:04:01 | 27.738 |
| 11/24/2010 20:49:01 | 27.5503 | 11/25/2010 18:24:01 | 27.738 |
| 11/24/2010 21:09:01 | 27.5503 | 11/25/2010 18:44:01 | 27.8   |
| 11/24/2010 21:29:01 | 27.5503 | 11/25/2010 19:04:01 | 27.8   |
| 11/24/2010 21:49:01 | 27.4873 | 11/25/2010 19:24:01 | 27.8   |
| 11/24/2010 22:09:01 | 27.4873 | 11/25/2010 19:44:01 | 27.8   |
| 11/24/2010 22:29:01 | 27.4873 | 11/25/2010 20:04:01 | 27.8   |
| 11/24/2010 22:49:01 | 27.4873 | 11/25/2010 20:24:01 | 27.8   |
| 11/24/2010 23:09:01 | 27.4873 | 11/25/2010 20:44:01 | 27.8   |
| 11/24/2010 23:29:01 | 27.4873 | 11/25/2010 21:04:01 | 27.863 |
| 11/24/2010 23:49:01 | 27.4873 | 11/25/2010 21:24:01 | 27.863 |
| 11/25/2010 00:09:01 | 27.4253 | 11/25/2010 21:44:01 | 27.863 |
| 11/25/2010 00:29:01 | 27.4253 | 11/25/2010 22:04:01 | 27.863 |
| 11/25/2010 00:49:01 | 27.4253 | 11/25/2010 22:24:01 | 27.863 |
| 11/25/2010 01:09:01 | 27.4253 | 11/25/2010 22:44:01 | 27.863 |
| 11/25/2010 01:29:01 | 27.3623 | 11/25/2010 23:04:01 | 27.863 |
| 11/25/2010 01:49:01 | 27.3623 | 11/25/2010 23:24:01 | 27.863 |
| 11/25/2010 02:09:01 | 27.3623 | 11/25/2010 23:44:01 | 27.863 |
| 11/25/2010 02:29:01 | 27.3623 | 11/26/2010 00:04:01 | 27.863 |
| 11/25/2010 02:49:01 | 27.3623 | 11/26/2010 00:24:01 | 27.863 |
| 11/25/2010 03:09:01 | 27.3003 | 11/26/2010 00:44:01 | 27.863 |
| 11/25/2010 03:29:01 | 27.3003 | 11/26/2010 01:04:01 | 27.8   |
| 11/25/2010 03:49:01 | 27.3003 | 11/26/2010 01:24:01 | 27.8   |
| 11/25/2010 04:09:01 | 27.3003 | 11/26/2010 01:44:01 | 27.8   |
| 11/25/2010 04:29:01 | 27.2373 | 11/26/2010 02:04:01 | 27.8   |
| 11/25/2010 04:49:01 | 27.2373 | 11/26/2010 02:24:01 | 27.8   |
| 11/25/2010 05:09:01 | 27.2373 | 11/26/2010 02:44:01 | 27.8   |
| 11/25/2010 05:29:01 | 27.2373 | 11/26/2010 03:04:01 | 27.738 |
| 11/25/2010 05:49:01 | 27.1753 | 11/26/2010 03:24:01 | 27.738 |
| 11/25/2010 06:09:01 | 27.1753 | 11/26/2010 03:44:01 | 27.738 |
| 11/25/2010 06:29:01 | 27.1753 | 11/26/2010 04:04:01 | 27.738 |
| 11/25/2010 06:49:01 | 27.1753 | 11/26/2010 04:24:01 | 27.738 |
| 11/25/2010 07:09:01 | 27.1753 | 11/26/2010 04:44:01 | 27.675 |

|                     |         |                     |        |
|---------------------|---------|---------------------|--------|
| 11/25/2010 07:29:01 | 27.1123 | 11/26/2010 05:04:01 | 27.675 |
| 11/25/2010 07:49:01 | 27.1123 | 11/26/2010 05:24:01 | 27.675 |
| 11/25/2010 08:09:01 | 27.1123 | 11/26/2010 05:44:01 | 27.675 |
| 11/25/2010 08:29:01 | 27.0503 | 11/26/2010 06:04:01 | 27.613 |
| 11/25/2010 08:49:01 | 27.0503 | 11/26/2010 06:24:01 | 27.613 |
| 11/25/2010 09:09:01 | 27.0503 | 11/26/2010 06:44:01 | 27.613 |
| 11/25/2010 09:29:01 | 27.0503 | 11/26/2010 07:04:01 | 27.613 |
| 11/25/2010 09:49:01 | 27.0503 | 11/26/2010 07:24:01 | 27.55  |
| 11/25/2010 10:09:01 | 26.9873 | 11/26/2010 07:44:01 | 27.55  |
| 11/25/2010 10:29:01 | 26.9873 | 11/26/2010 08:04:01 | 27.55  |
| 11/25/2010 10:49:01 | 26.9873 | 11/26/2010 08:24:01 | 27.488 |
| 11/25/2010 11:09:01 | 26.9873 | 11/26/2010 08:44:01 | 27.488 |
| 11/25/2010 11:29:01 | 26.9873 | 11/26/2010 09:04:01 | 27.488 |
| 11/25/2010 11:49:01 | 26.9873 | 11/26/2010 09:24:01 | 27.425 |
| 11/25/2010 12:09:01 | 26.9873 | 11/26/2010 09:44:01 | 27.425 |
| 11/25/2010 12:29:01 | 26.9873 | 11/26/2010 10:04:01 | 27.425 |
| 11/25/2010 12:49:01 | 26.9873 | 11/26/2010 10:24:01 | 27.363 |
| 11/25/2010 13:09:01 | 26.9873 | 11/26/2010 10:44:01 | 27.363 |
| 11/25/2010 13:29:01 | 26.9873 | 11/26/2010 11:04:01 | 27.363 |
| 11/25/2010 13:49:01 | 26.9873 | 11/26/2010 11:24:01 | 27.3   |
| 11/25/2010 14:09:01 | 26.9873 | 11/26/2010 11:44:01 | 27.3   |
| 11/25/2010 14:29:01 | 26.9873 | 11/26/2010 12:04:01 | 27.3   |
| 11/25/2010 14:49:01 | 26.9873 | 11/26/2010 12:24:01 | 27.3   |
| 11/25/2010 15:09:01 | 27.0503 | 11/26/2010 12:44:01 | 27.3   |
| 11/25/2010 15:29:01 | 27.0503 | 11/26/2010 13:04:01 | 27.3   |
| 11/25/2010 15:49:01 | 27.0503 | 11/26/2010 13:24:01 | 27.3   |
| 11/25/2010 16:09:01 | 27.0503 | 11/26/2010 13:44:01 | 27.3   |
| 11/25/2010 16:29:01 | 27.0503 | 11/26/2010 14:04:01 | 27.3   |
| 11/25/2010 16:49:01 | 27.1123 | 11/26/2010 14:24:01 | 27.3   |
| 11/25/2010 17:09:01 | 27.1123 | 11/26/2010 14:44:01 | 27.3   |
| 11/25/2010 17:29:01 | 27.1123 | 11/26/2010 15:04:01 | 27.3   |
| 11/25/2010 17:49:01 | 27.1123 | 11/26/2010 15:24:01 | 27.363 |
| 11/25/2010 18:09:01 | 27.1123 | 11/26/2010 15:44:01 | 27.363 |
| 11/25/2010 18:29:01 | 27.1123 | 11/26/2010 16:04:01 | 27.363 |
| 11/25/2010 18:49:01 | 27.1123 | 11/26/2010 16:24:01 | 27.425 |
| 11/25/2010 19:09:01 | 27.1123 | 11/26/2010 16:44:01 | 27.425 |
| 11/25/2010 19:29:01 | 27.1753 | 11/26/2010 17:04:01 | 27.425 |
| 11/25/2010 19:49:01 | 27.1123 | 11/26/2010 17:24:01 | 27.425 |
| 11/25/2010 20:09:01 | 27.1123 | 11/26/2010 17:44:01 | 27.488 |
| 11/25/2010 20:29:01 | 27.1123 | 11/26/2010 18:04:01 | 27.488 |
| 11/25/2010 20:49:01 | 27.1123 | 11/26/2010 18:24:01 | 27.488 |
| 11/25/2010 21:09:01 | 27.1123 | 11/26/2010 18:44:01 | 27.488 |
| 11/25/2010 21:29:01 | 27.1123 | 11/26/2010 19:04:01 | 27.55  |
| 11/25/2010 21:49:01 | 27.1123 | 11/26/2010 19:24:01 | 27.55  |
| 11/25/2010 22:09:01 | 27.1123 | 11/26/2010 19:44:01 | 27.55  |
| 11/25/2010 22:29:01 | 27.1123 | 11/26/2010 20:04:01 | 27.55  |
| 11/25/2010 22:49:01 | 27.1123 | 11/26/2010 20:24:01 | 27.613 |
| 11/25/2010 23:09:01 | 27.1123 | 11/26/2010 20:44:01 | 27.613 |
| 11/25/2010 23:29:01 | 27.1123 | 11/26/2010 21:04:01 | 27.613 |
| 11/25/2010 23:49:01 | 27.0503 | 11/26/2010 21:24:01 | 27.613 |

|                     |         |                     |        |
|---------------------|---------|---------------------|--------|
| 11/26/2010 00:09:01 | 27.0503 | 11/26/2010 21:44:01 | 27.613 |
| 11/26/2010 00:29:01 | 27.0503 | 11/26/2010 22:04:01 | 27.613 |
| 11/26/2010 00:49:01 | 27.0503 | 11/26/2010 22:24:01 | 27.613 |
| 11/26/2010 01:09:01 | 27.0503 | 11/26/2010 22:44:01 | 27.613 |
| 11/26/2010 01:29:01 | 27.0503 | 11/26/2010 23:04:01 | 27.613 |
| 11/26/2010 01:49:01 | 26.9873 | 11/26/2010 23:24:01 | 27.613 |
| 11/26/2010 02:09:01 | 26.9873 | 11/26/2010 23:44:01 | 27.613 |
| 11/26/2010 02:29:01 | 26.9873 | 11/27/2010 00:04:01 | 27.613 |
| 11/26/2010 02:49:01 | 26.9873 | 11/27/2010 00:24:01 | 27.55  |
| 11/26/2010 03:09:01 | 26.9253 | 11/27/2010 00:44:01 | 27.55  |
| 11/26/2010 03:29:01 | 26.9253 | 11/27/2010 01:04:01 | 27.55  |
| 11/26/2010 03:49:01 | 26.9253 | 11/27/2010 01:24:01 | 27.55  |
| 11/26/2010 04:09:01 | 26.9253 | 11/27/2010 01:44:01 | 27.55  |
| 11/26/2010 04:29:01 | 26.9253 | 11/27/2010 02:04:01 | 27.55  |
| 11/26/2010 04:49:01 | 26.8623 | 11/27/2010 02:24:01 | 27.55  |
| 11/26/2010 05:09:01 | 26.8623 | 11/27/2010 02:44:01 | 27.488 |
| 11/26/2010 05:29:01 | 26.8623 | 11/27/2010 03:04:01 | 27.488 |
| 11/26/2010 05:49:01 | 26.8623 | 11/27/2010 03:24:01 | 27.488 |
| 11/26/2010 06:09:01 | 26.8003 | 11/27/2010 03:44:01 | 27.488 |
| 11/26/2010 06:29:01 | 26.8003 | 11/27/2010 04:04:01 | 27.425 |
| 11/26/2010 06:49:01 | 26.8003 | 11/27/2010 04:24:01 | 27.425 |
| 11/26/2010 07:09:01 | 26.8003 | 11/27/2010 04:44:01 | 27.425 |
| 11/26/2010 07:29:01 | 26.8003 | 11/27/2010 05:04:01 | 27.425 |
| 11/26/2010 07:49:01 | 26.8003 | 11/27/2010 05:24:01 | 27.363 |
| 11/26/2010 08:09:01 | 26.7383 | 11/27/2010 05:44:01 | 27.363 |
| 11/26/2010 08:29:01 | 26.7383 | 11/27/2010 06:04:01 | 27.363 |
| 11/26/2010 08:49:01 | 26.7383 | 11/27/2010 06:24:01 | 27.363 |
| 11/26/2010 09:09:01 | 26.7383 | 11/27/2010 06:44:01 | 27.3   |
| 11/26/2010 09:29:01 | 26.7383 | 11/27/2010 07:04:01 | 27.3   |
| 11/26/2010 09:49:01 | 26.6753 | 11/27/2010 07:24:01 | 27.3   |
| 11/26/2010 10:09:01 | 26.6753 | 11/27/2010 07:44:01 | 27.3   |
| 11/26/2010 10:29:01 | 26.6753 | 11/27/2010 08:04:01 | 27.3   |
| 11/26/2010 10:49:01 | 26.6753 | 11/27/2010 08:24:01 | 27.238 |
| 11/26/2010 11:09:01 | 26.6133 | 11/27/2010 08:44:01 | 27.238 |
| 11/26/2010 11:29:01 | 26.6133 | 11/27/2010 09:04:01 | 27.238 |
| 11/26/2010 11:49:01 | 26.6133 | 11/27/2010 09:24:01 | 27.176 |
| 11/26/2010 12:09:01 | 26.6133 | 11/27/2010 09:44:01 | 27.176 |
| 11/26/2010 12:29:01 | 26.6133 | 11/27/2010 10:04:01 | 27.176 |
| 11/26/2010 12:49:01 | 26.6753 | 11/27/2010 10:24:01 | 27.176 |
| 11/26/2010 13:09:01 | 26.6753 | 11/27/2010 10:44:01 | 27.176 |
| 11/26/2010 13:29:01 | 26.6753 | 11/27/2010 11:04:01 | 27.176 |
| 11/26/2010 13:49:01 | 26.7383 | 11/27/2010 11:24:01 | 27.113 |
| 11/26/2010 14:09:01 | 26.7383 | 11/27/2010 11:44:01 | 27.113 |
| 11/26/2010 14:29:01 | 26.8003 | 11/27/2010 12:04:01 | 27.113 |
| 11/26/2010 14:49:01 | 26.8003 | 11/27/2010 12:24:01 | 27.113 |
| 11/26/2010 15:09:01 | 26.8623 | 11/27/2010 12:44:01 | 27.113 |
| 11/26/2010 15:29:01 | 26.8623 | 11/27/2010 13:04:01 | 27.176 |
| 11/26/2010 15:49:01 | 26.8623 | 11/27/2010 13:24:01 | 27.176 |
| 11/26/2010 16:09:01 | 26.9253 | 11/27/2010 13:44:01 | 27.176 |
| 11/26/2010 16:29:01 | 26.9253 | 11/27/2010 14:04:01 | 27.176 |

|                     |         |                     |        |
|---------------------|---------|---------------------|--------|
| 11/26/2010 16:49:01 | 26.9873 | 11/27/2010 14:24:01 | 27.176 |
| 11/26/2010 17:09:01 | 26.9873 | 11/27/2010 14:44:01 | 27.238 |
| 11/26/2010 17:29:01 | 26.9873 | 11/27/2010 15:04:01 | 27.238 |
| 11/26/2010 17:49:01 | 27.0503 | 11/27/2010 15:24:01 | 27.238 |
| 11/26/2010 18:09:01 | 27.0503 | 11/27/2010 15:44:01 | 27.238 |
| 11/26/2010 18:29:01 | 27.0503 | 11/27/2010 16:04:01 | 27.3   |
| 11/26/2010 18:49:01 | 27.1123 | 11/27/2010 16:24:01 | 27.3   |
| 11/26/2010 19:09:01 | 27.1123 | 11/27/2010 16:44:01 | 27.3   |
| 11/26/2010 19:29:01 | 27.1123 | 11/27/2010 17:04:01 | 27.363 |
| 11/26/2010 19:49:01 | 27.1123 | 11/27/2010 17:24:01 | 27.363 |
| 11/26/2010 20:09:01 | 27.1123 | 11/27/2010 17:44:01 | 27.363 |
| 11/26/2010 20:29:01 | 27.1123 | 11/27/2010 18:04:01 | 27.363 |
| 11/26/2010 20:49:01 | 27.1123 | 11/27/2010 18:24:01 | 27.425 |
| 11/26/2010 21:09:01 | 27.1123 | 11/27/2010 18:44:01 | 27.425 |
| 11/26/2010 21:29:01 | 27.1123 | 11/27/2010 19:04:01 | 27.425 |
| 11/26/2010 21:49:01 | 27.1123 | 11/27/2010 19:24:01 | 27.425 |
| 11/26/2010 22:09:01 | 27.1123 | 11/27/2010 19:44:01 | 27.488 |
| 11/26/2010 22:29:01 | 27.1123 | 11/27/2010 20:04:01 | 27.488 |
| 11/26/2010 22:49:01 | 27.1123 | 11/27/2010 20:24:01 | 27.488 |
| 11/26/2010 23:09:01 | 27.1123 | 11/27/2010 20:44:01 | 27.488 |
| 11/26/2010 23:29:01 | 27.1123 | 11/27/2010 21:04:01 | 27.488 |
| 11/26/2010 23:49:01 | 27.1123 | 11/27/2010 21:24:01 | 27.488 |
| 11/27/2010 00:09:01 | 27.0503 | 11/27/2010 21:44:01 | 27.488 |
| 11/27/2010 00:29:01 | 27.0503 | 11/27/2010 22:04:01 | 27.488 |
| 11/27/2010 00:49:01 | 27.0503 | 11/27/2010 22:24:01 | 27.488 |
| 11/27/2010 01:09:01 | 27.0503 | 11/27/2010 22:44:01 | 27.488 |
| 11/27/2010 01:29:01 | 27.0503 | 11/27/2010 23:04:01 | 27.488 |
| 11/27/2010 01:49:01 | 26.9873 | 11/27/2010 23:24:01 | 27.488 |
| 11/27/2010 02:09:01 | 26.9873 | 11/27/2010 23:44:01 | 27.488 |
| 11/27/2010 02:29:01 | 26.9873 | 11/28/2010 00:04:01 | 27.488 |
| 11/27/2010 02:49:01 | 26.9873 | 11/28/2010 00:24:01 | 27.488 |
| 11/27/2010 03:09:01 | 26.9253 | 11/28/2010 00:44:01 | 27.488 |
| 11/27/2010 03:29:01 | 26.9253 | 11/28/2010 01:04:01 | 27.488 |
| 11/27/2010 03:49:01 | 26.9253 | 11/28/2010 01:24:01 | 27.488 |
| 11/27/2010 04:09:01 | 26.9253 | 11/28/2010 01:44:01 | 27.488 |
| 11/27/2010 04:29:01 | 26.9253 | 11/28/2010 02:04:01 | 27.425 |
| 11/27/2010 04:49:01 | 26.8623 | 11/28/2010 02:24:01 | 27.425 |
| 11/27/2010 05:09:01 | 26.8623 | 11/28/2010 02:44:01 | 27.425 |
| 11/27/2010 05:29:01 | 26.8623 | 11/28/2010 03:04:01 | 27.425 |
| 11/27/2010 05:49:01 | 26.8003 | 11/28/2010 03:24:01 | 27.425 |
| 11/27/2010 06:09:01 | 26.8003 | 11/28/2010 03:44:01 | 27.425 |
| 11/27/2010 06:29:01 | 26.8003 | 11/28/2010 04:04:01 | 27.363 |
| 11/27/2010 06:49:01 | 26.8003 | 11/28/2010 04:24:01 | 27.363 |
| 11/27/2010 07:09:01 | 26.7383 | 11/28/2010 04:44:01 | 27.363 |
| 11/27/2010 07:29:01 | 26.7383 | 11/28/2010 05:04:01 | 27.363 |
| 11/27/2010 07:49:01 | 26.7383 | 11/28/2010 05:24:01 | 27.363 |
| 11/27/2010 08:09:01 | 26.7383 | 11/28/2010 05:44:01 | 27.3   |
| 11/27/2010 08:29:01 | 26.6753 | 11/28/2010 06:04:01 | 27.3   |
| 11/27/2010 08:49:01 | 26.6753 | 11/28/2010 06:24:01 | 27.3   |
| 11/27/2010 09:09:01 | 26.6753 | 11/28/2010 06:44:01 | 27.3   |



|                     |         |                     |        |
|---------------------|---------|---------------------|--------|
| 11/27/2010 09:29:01 | 26.6753 | 11/28/2010 07:04:01 | 27.3   |
| 11/27/2010 09:49:01 | 26.6753 | 11/28/2010 07:24:01 | 27.238 |
| 11/27/2010 10:09:01 | 26.6753 | 11/28/2010 07:44:01 | 27.238 |
| 11/27/2010 10:29:01 | 26.6753 | 11/28/2010 08:04:01 | 27.238 |
| 11/27/2010 10:49:01 | 26.6133 | 11/28/2010 08:24:01 | 27.238 |
| 11/27/2010 11:09:01 | 26.6753 | 11/28/2010 08:44:01 | 27.238 |
| 11/27/2010 11:29:01 | 26.6753 | 11/28/2010 09:04:01 | 27.176 |
| 11/27/2010 11:49:01 | 26.6753 | 11/28/2010 09:24:01 | 27.176 |
| 11/27/2010 12:09:01 | 26.6753 | 11/28/2010 09:44:01 | 27.176 |
| 11/27/2010 12:29:01 | 26.6753 | 11/28/2010 10:04:01 | 27.176 |
| 11/27/2010 12:49:01 | 26.6753 | 11/28/2010 10:24:01 | 27.176 |
| 11/27/2010 13:09:01 | 26.7383 | 11/28/2010 10:44:01 | 27.176 |
| 11/27/2010 13:29:01 | 26.7383 | 11/28/2010 11:04:01 | 27.176 |
| 11/27/2010 13:49:01 | 26.7383 | 11/28/2010 11:24:01 | 27.113 |
| 11/27/2010 14:09:01 | 26.8003 | 11/28/2010 11:44:01 | 27.113 |
| 11/27/2010 14:29:01 | 26.8003 | 11/28/2010 12:04:01 | 27.176 |
| 11/27/2010 14:49:01 | 26.8003 | 11/28/2010 12:24:01 | 27.113 |
| 11/27/2010 15:09:01 | 26.8623 | 11/28/2010 12:44:01 | 27.176 |
| 11/27/2010 15:29:01 | 26.8623 | 11/28/2010 13:04:01 | 27.176 |
| 11/27/2010 15:49:01 | 26.9253 | 11/28/2010 13:24:01 | 27.176 |
| 11/27/2010 16:09:01 | 26.9253 | 11/28/2010 13:44:01 | 27.176 |
| 11/27/2010 16:29:01 | 26.9253 | 11/28/2010 14:04:01 | 27.176 |
| 11/27/2010 16:49:01 | 26.9873 | 11/28/2010 14:24:01 | 27.176 |
| 11/27/2010 17:09:01 | 26.9873 | 11/28/2010 14:44:01 | 27.238 |
| 11/27/2010 17:29:01 | 26.9873 | 11/28/2010 15:04:01 | 27.238 |
| 11/27/2010 17:49:01 | 27.0503 | 11/28/2010 15:24:01 | 27.238 |
| 11/27/2010 18:09:01 | 27.0503 | 11/28/2010 15:44:01 | 27.3   |
| 11/27/2010 18:29:01 | 27.0503 | 11/28/2010 16:04:01 | 27.3   |
| 11/27/2010 18:49:01 | 27.0503 | 11/28/2010 16:24:01 | 27.3   |
| 11/27/2010 19:09:01 | 27.0503 | 11/28/2010 16:44:01 | 27.363 |
| 11/27/2010 19:29:01 | 27.0503 | 11/28/2010 17:04:01 | 27.363 |
| 11/27/2010 19:49:01 | 27.1123 | 11/28/2010 17:24:01 | 27.363 |
| 11/27/2010 20:09:01 | 27.1123 | 11/28/2010 17:44:01 | 27.363 |
| 11/27/2010 20:29:01 | 27.1123 | 11/28/2010 18:04:01 | 27.425 |
| 11/27/2010 20:49:01 | 27.1123 | 11/28/2010 18:24:01 | 27.425 |
| 11/27/2010 21:09:01 | 27.1123 | 11/28/2010 18:44:01 | 27.425 |
| 11/27/2010 21:29:01 | 27.1123 | 11/28/2010 19:04:01 | 27.488 |
| 11/27/2010 21:49:01 | 27.1123 | 11/28/2010 19:24:01 | 27.488 |
| 11/27/2010 22:09:01 | 27.0503 | 11/28/2010 19:44:01 | 27.488 |
| 11/27/2010 22:29:01 | 27.1123 | 11/28/2010 20:04:01 | 27.488 |
| 11/27/2010 22:49:01 | 27.0503 | 11/28/2010 20:24:01 | 27.488 |
| 11/27/2010 23:09:01 | 27.0503 | 11/28/2010 20:44:01 | 27.55  |
| 11/27/2010 23:29:01 | 27.0503 | 11/28/2010 21:04:01 | 27.55  |
| 11/27/2010 23:49:01 | 27.0503 | 11/28/2010 21:24:01 | 27.55  |
| 11/28/2010 00:09:01 | 27.0503 | 11/28/2010 21:44:01 | 27.55  |
| 11/28/2010 00:29:01 | 27.0503 | 11/28/2010 22:04:01 | 27.55  |
| 11/28/2010 00:49:01 | 26.9873 | 11/28/2010 22:24:01 | 27.55  |
| 11/28/2010 01:09:01 | 26.9873 | 11/28/2010 22:44:01 | 27.55  |
| 11/28/2010 01:29:01 | 26.9873 | 11/28/2010 23:04:01 | 27.55  |
| 11/28/2010 01:49:01 | 26.9873 | 11/28/2010 23:24:01 | 27.55  |

|                     |         |                     |        |
|---------------------|---------|---------------------|--------|
| 11/28/2010 02:09:01 | 26.9873 | 11/28/2010 23:44:01 | 27.55  |
| 11/28/2010 02:29:01 | 26.9253 | 11/29/2010 00:04:01 | 27.55  |
| 11/28/2010 02:49:01 | 26.9253 | 11/29/2010 00:24:01 | 27.55  |
| 11/28/2010 03:09:01 | 26.9253 | 11/29/2010 00:44:01 | 27.55  |
| 11/28/2010 03:29:01 | 26.9253 | 11/29/2010 01:04:01 | 27.55  |
| 11/28/2010 03:49:01 | 26.9253 | 11/29/2010 01:24:01 | 27.55  |
| 11/28/2010 04:09:01 | 26.8623 | 11/29/2010 01:44:01 | 27.55  |
| 11/28/2010 04:29:01 | 26.8623 | 11/29/2010 02:04:01 | 27.488 |
| 11/28/2010 04:49:01 | 26.8623 | 11/29/2010 02:24:01 | 27.488 |
| 11/28/2010 05:09:01 | 26.8623 | 11/29/2010 02:44:01 | 27.488 |
| 11/28/2010 05:29:01 | 26.8623 | 11/29/2010 03:04:01 | 27.488 |
| 11/28/2010 05:49:01 | 26.8003 | 11/29/2010 03:24:01 | 27.488 |
| 11/28/2010 06:09:01 | 26.8003 | 11/29/2010 03:44:01 | 27.425 |
| 11/28/2010 06:29:01 | 26.8003 | 11/29/2010 04:04:01 | 27.425 |
| 11/28/2010 06:49:01 | 26.8003 | 11/29/2010 04:24:01 | 27.425 |
| 11/28/2010 07:09:01 | 26.8003 | 11/29/2010 04:44:01 | 27.425 |
| 11/28/2010 07:29:01 | 26.7383 | 11/29/2010 05:04:01 | 27.425 |
| 11/28/2010 07:49:01 | 26.7383 | 11/29/2010 05:24:01 | 27.425 |
| 11/28/2010 08:09:01 | 26.7383 | 11/29/2010 05:44:01 | 27.363 |
| 11/28/2010 08:29:01 | 26.7383 | 11/29/2010 06:04:01 | 27.363 |
| 11/28/2010 08:49:01 | 26.7383 | 11/29/2010 06:24:01 | 27.363 |
| 11/28/2010 09:09:01 | 26.7383 | 11/29/2010 06:44:01 | 27.363 |
| 11/28/2010 09:29:01 | 26.6753 | 11/29/2010 07:04:01 | 27.363 |
| 11/28/2010 09:49:01 | 26.6753 | 11/29/2010 07:24:01 | 27.3   |
| 11/28/2010 10:09:01 | 26.6753 | 11/29/2010 07:44:01 | 27.3   |
| 11/28/2010 10:29:01 | 26.6753 | 11/29/2010 08:04:01 | 27.3   |
| 11/28/2010 10:49:01 | 26.6753 | 11/29/2010 08:24:01 | 27.3   |
| 11/28/2010 11:09:01 | 26.6753 | 11/29/2010 08:44:01 | 27.238 |
| 11/28/2010 11:29:01 | 26.6753 | 11/29/2010 09:04:01 | 27.238 |
| 11/28/2010 11:49:01 | 26.6753 | 11/29/2010 09:24:01 | 27.238 |
| 11/28/2010 12:09:01 | 26.7383 | 11/29/2010 09:44:01 | 27.238 |
| 11/28/2010 12:29:01 | 26.7383 | 11/29/2010 10:04:01 | 27.238 |
| 11/28/2010 12:49:01 | 26.7383 | 11/29/2010 10:24:01 | 27.176 |
| 11/28/2010 13:09:01 | 26.7383 | 11/29/2010 10:44:01 | 27.176 |
| 11/28/2010 13:29:01 | 26.8003 | 11/29/2010 11:04:01 | 27.176 |
| 11/28/2010 13:49:01 | 26.8003 | 11/29/2010 11:24:01 | 27.176 |
| 11/28/2010 14:09:01 | 26.8003 | 11/29/2010 11:44:01 | 27.176 |
| 11/28/2010 14:29:01 | 26.8623 | 11/29/2010 12:04:01 | 27.176 |
| 11/28/2010 14:49:01 | 26.8623 | 11/29/2010 12:24:01 | 27.176 |
| 11/28/2010 15:09:01 | 26.8623 | 11/29/2010 12:44:01 | 27.176 |
| 11/28/2010 15:29:01 | 26.9253 | 11/29/2010 13:04:01 | 27.113 |
| 11/28/2010 15:49:01 | 26.9253 | 11/29/2010 13:24:01 | 27.113 |
| 11/28/2010 16:09:01 | 26.9253 | 11/29/2010 13:44:01 | 27.113 |
| 11/28/2010 16:29:01 | 26.9873 | 11/29/2010 14:04:01 | 27.113 |
| 11/28/2010 16:49:01 | 26.9873 | 11/29/2010 14:24:01 | 27.113 |
| 11/28/2010 17:09:01 | 26.9873 | 11/29/2010 14:44:01 | 27.113 |
| 11/28/2010 17:29:01 | 27.0503 | 11/29/2010 15:04:01 | 27.176 |
| 11/28/2010 17:49:01 | 27.0503 | 11/29/2010 15:24:01 | 27.176 |
| 11/28/2010 18:09:01 | 27.0503 | 11/29/2010 15:44:01 | 27.176 |
| 11/28/2010 18:29:01 | 27.1123 | 11/29/2010 16:04:01 | 27.176 |

|                     |         |                     |        |
|---------------------|---------|---------------------|--------|
| 11/28/2010 18:49:01 | 27.1123 | 11/29/2010 16:24:01 | 27.176 |
| 11/28/2010 19:09:01 | 27.1123 | 11/29/2010 16:44:01 | 27.238 |
| 11/28/2010 19:29:01 | 27.1123 | 11/29/2010 17:04:01 | 27.238 |
| 11/28/2010 19:49:01 | 27.1123 | 11/29/2010 17:24:01 | 27.238 |
| 11/28/2010 20:09:01 | 27.1123 | 11/29/2010 17:44:01 | 27.238 |
| 11/28/2010 20:29:01 | 27.1123 | 11/29/2010 18:04:01 | 27.238 |
| 11/28/2010 20:49:01 | 27.1123 | 11/29/2010 18:24:01 | 27.3   |
| 11/28/2010 21:09:01 | 27.1123 | 11/29/2010 18:44:01 | 27.3   |
| 11/28/2010 21:29:01 | 27.1123 | 11/29/2010 19:04:01 | 27.3   |
| 11/28/2010 21:49:01 | 27.1123 | 11/29/2010 19:24:01 | 27.3   |
| 11/28/2010 22:09:01 | 27.1123 | 11/29/2010 19:44:01 | 27.3   |
| 11/28/2010 22:29:01 | 27.1123 | 11/29/2010 20:04:01 | 27.3   |
| 11/28/2010 22:49:01 | 27.1123 | 11/29/2010 20:24:01 | 27.363 |
| 11/28/2010 23:09:01 | 27.1123 | 11/29/2010 20:44:01 | 27.363 |
| 11/28/2010 23:29:01 | 27.0503 | 11/29/2010 21:04:01 | 27.363 |
| 11/28/2010 23:49:01 | 27.0503 | 11/29/2010 21:24:01 | 27.3   |
| 11/29/2010 00:09:01 | 27.0503 | 11/29/2010 21:44:01 | 27.363 |
| 11/29/2010 00:29:01 | 27.0503 | 11/29/2010 22:04:01 | 27.363 |
| 11/29/2010 00:49:01 | 27.0503 | 11/29/2010 22:24:01 | 27.363 |
| 11/29/2010 01:09:01 | 27.0503 | 11/29/2010 22:44:01 | 27.3   |
| 11/29/2010 01:29:01 | 26.9873 | 11/29/2010 23:04:01 | 27.3   |
| 11/29/2010 01:49:01 | 26.9873 | 11/29/2010 23:24:01 | 27.3   |
| 11/29/2010 02:09:01 | 26.9873 | 11/29/2010 23:44:01 | 27.3   |
| 11/29/2010 02:29:01 | 26.9873 | 11/30/2010 00:04:01 | 27.3   |
| 11/29/2010 02:49:01 | 26.9253 | 11/30/2010 00:24:01 | 27.3   |
| 11/29/2010 03:09:01 | 26.9253 | 11/30/2010 00:44:01 | 27.3   |
| 11/29/2010 03:29:01 | 26.9253 | 11/30/2010 01:04:01 | 27.3   |
| 11/29/2010 03:49:01 | 26.9253 | 11/30/2010 01:24:01 | 27.238 |
| 11/29/2010 04:09:01 | 26.9253 | 11/30/2010 01:44:01 | 27.238 |
| 11/29/2010 04:29:01 | 26.8623 | 11/30/2010 02:04:01 | 27.238 |
| 11/29/2010 04:49:01 | 26.8623 | 11/30/2010 02:24:01 | 27.238 |
| 11/29/2010 05:09:01 | 26.8623 | 11/30/2010 02:44:01 | 27.238 |
| 11/29/2010 05:29:01 | 26.8003 | 11/30/2010 03:04:01 | 27.238 |
| 11/29/2010 05:49:01 | 26.8003 | 11/30/2010 03:24:01 | 27.238 |
| 11/29/2010 06:09:01 | 26.8003 | 11/30/2010 03:44:01 | 27.176 |
| 11/29/2010 06:29:01 | 26.8003 | 11/30/2010 04:04:01 | 27.176 |
| 11/29/2010 06:49:01 | 26.7383 | 11/30/2010 04:24:01 | 27.176 |
| 11/29/2010 07:09:01 | 26.7383 | 11/30/2010 04:44:01 | 27.176 |
| 11/29/2010 07:29:01 | 26.7383 | 11/30/2010 05:04:01 | 27.176 |
| 11/29/2010 07:49:01 | 26.7383 | 11/30/2010 05:24:01 | 27.176 |
| 11/29/2010 08:09:01 | 26.6753 | 11/30/2010 05:44:01 | 27.113 |
| 11/29/2010 08:29:01 | 26.6753 | 11/30/2010 06:04:01 | 27.113 |
| 11/29/2010 08:49:01 | 26.6753 | 11/30/2010 06:24:01 | 27.113 |
| 11/29/2010 09:09:01 | 26.6753 | 11/30/2010 06:44:01 | 27.113 |
| 11/29/2010 09:29:01 | 26.6753 | 11/30/2010 07:04:01 | 27.113 |
| 11/29/2010 09:49:01 | 26.6753 | 11/30/2010 07:24:01 | 27.113 |
| 11/29/2010 10:09:01 | 26.6133 | 11/30/2010 07:44:01 | 27.051 |
| 11/29/2010 10:29:01 | 26.6133 |                     |        |
| 11/29/2010 10:49:01 | 26.6133 |                     |        |
| 11/29/2010 11:09:01 | 26.6133 |                     |        |

|                     |         |
|---------------------|---------|
| 11/29/2010 11:29:01 | 26.6133 |
| 11/29/2010 11:49:01 | 26.6133 |
| 11/29/2010 12:09:01 | 26.6133 |
| 11/29/2010 12:29:01 | 26.6133 |
| 11/29/2010 12:49:01 | 26.6133 |
| 11/29/2010 13:09:01 | 26.6133 |
| 11/29/2010 13:29:01 | 26.6133 |
| 11/29/2010 13:49:01 | 26.6133 |
| 11/29/2010 14:09:01 | 26.6133 |
| 11/29/2010 14:29:01 | 26.6133 |
| 11/29/2010 14:49:01 | 26.6753 |
| 11/29/2010 15:09:01 | 26.6753 |
| 11/29/2010 15:29:01 | 26.6753 |
| 11/29/2010 15:49:01 | 26.7383 |
| 11/29/2010 16:09:01 | 26.8003 |
| 11/29/2010 16:29:01 | 26.8003 |
| 11/29/2010 16:49:01 | 26.8623 |
| 11/29/2010 17:09:01 | 26.8623 |
| 11/29/2010 17:29:01 | 26.8623 |
| 11/29/2010 17:49:01 | 26.9253 |
| 11/29/2010 18:09:01 | 26.9253 |
| 11/29/2010 18:29:01 | 26.9253 |
| 11/29/2010 18:49:01 | 26.9873 |
| 11/29/2010 19:09:01 | 26.9873 |
| 11/29/2010 19:29:01 | 26.9873 |
| 11/29/2010 19:49:01 | 26.9873 |
| 11/29/2010 20:09:01 | 26.9873 |
| 11/29/2010 20:29:01 | 26.9873 |
| 11/29/2010 20:49:01 | 26.9873 |
| 11/29/2010 21:09:01 | 26.9873 |
| 11/29/2010 21:29:01 | 26.9873 |
| 11/29/2010 21:49:01 | 26.9873 |
| 11/29/2010 22:09:01 | 26.9873 |
| 11/29/2010 22:29:01 | 26.9873 |
| 11/29/2010 22:49:01 | 26.9873 |
| 11/29/2010 23:09:01 | 26.9873 |
| 11/29/2010 23:29:01 | 26.9873 |
| 11/29/2010 23:49:01 | 26.9253 |
| 11/30/2010 00:09:01 | 26.9253 |
| 11/30/2010 00:29:01 | 26.9253 |
| 11/30/2010 00:49:01 | 26.9253 |
| 11/30/2010 01:09:01 | 26.9253 |
| 11/30/2010 01:29:01 | 26.9253 |
| 11/30/2010 01:49:01 | 26.9253 |
| 11/30/2010 02:09:01 | 26.8623 |
| 11/30/2010 02:29:01 | 26.8623 |
| 11/30/2010 02:49:01 | 26.8623 |
| 11/30/2010 03:09:01 | 26.8623 |
| 11/30/2010 03:29:01 | 26.8623 |
| 11/30/2010 03:49:01 | 26.8003 |

|                     |         |
|---------------------|---------|
| 11/30/2010 04:09:01 | 26.8003 |
| 11/30/2010 04:29:01 | 26.8003 |
| 11/30/2010 04:49:01 | 26.8003 |
| 11/30/2010 05:09:01 | 26.8003 |
| 11/30/2010 05:29:01 | 26.7383 |
| 11/30/2010 05:49:01 | 26.7383 |
| 11/30/2010 06:09:01 | 26.7383 |
| 11/30/2010 06:29:01 | 26.7383 |
| 11/30/2010 06:49:01 | 26.7383 |
| 11/30/2010 07:09:01 | 26.7383 |
| 11/30/2010 07:29:01 | 26.6753 |
| 11/30/2010 07:49:01 | 26.6753 |
| 11/30/2010 08:09:01 | 26.6753 |
| 11/30/2010 08:29:01 | 26.6753 |
| 11/30/2010 08:49:01 | 26.6753 |
| 11/30/2010 09:09:01 | 26.6753 |
| 11/30/2010 09:29:01 | 26.6753 |
| 11/30/2010 09:49:01 | 26.6753 |
| 11/30/2010 10:09:01 | 26.6753 |
| 11/30/2010 10:29:01 | 26.6133 |
| 11/30/2010 10:49:01 | 26.6753 |
| 11/30/2010 11:09:01 | 26.6133 |
| 11/30/2010 11:29:01 | 26.6753 |
| 11/30/2010 11:49:01 | 26.6753 |
| 11/30/2010 12:09:01 | 26.6753 |
| 11/30/2010 12:29:01 | 26.6753 |
| 11/30/2010 12:49:01 | 26.7383 |
| 11/30/2010 13:09:01 | 26.7383 |
| 11/30/2010 13:29:01 | 26.7383 |
| 11/30/2010 13:49:01 | 26.8003 |
| 11/30/2010 14:09:01 | 26.8003 |
| 11/30/2010 14:29:01 | 26.8623 |
| 11/30/2010 14:49:01 | 26.8623 |
| 11/30/2010 15:09:01 | 26.9253 |
| 11/30/2010 15:29:01 | 26.9253 |
| 11/30/2010 15:49:01 | 26.9873 |
| 11/30/2010 16:09:01 | 27.0503 |
| 11/30/2010 16:29:01 | 27.0503 |
| 11/30/2010 16:49:01 | 27.1123 |
| 11/30/2010 17:09:01 | 27.1123 |
| 11/30/2010 17:29:01 | 27.1123 |
| 11/30/2010 17:49:01 | 27.1753 |
| 11/30/2010 18:09:01 | 27.1753 |
| 11/30/2010 18:29:01 | 27.2373 |
| 11/30/2010 18:49:01 | 27.2373 |
| 11/30/2010 19:09:01 | 27.2373 |
| 11/30/2010 19:29:01 | 27.2373 |
| 11/30/2010 19:49:01 | 27.2373 |
| 11/30/2010 20:09:01 | 27.2373 |
| 11/30/2010 20:29:01 | 27.2373 |

|                     |         |
|---------------------|---------|
| 11/30/2010 20:49:01 | 27.2373 |
| 11/30/2010 21:09:01 | 27.2373 |
| 11/30/2010 21:29:01 | 27.2373 |
| 11/30/2010 21:49:01 | 27.2373 |
| 11/30/2010 22:09:01 | 27.2373 |
| 11/30/2010 22:29:01 | 27.2373 |
| 11/30/2010 22:49:01 | 27.2373 |
| 11/30/2010 23:09:01 | 27.2373 |
| 11/30/2010 23:29:01 | 27.2373 |
| 11/30/2010 23:49:01 | 27.2373 |
| 12/1/2010 00:09:01  | 27.2373 |
| 12/1/2010 00:29:01  | 27.1753 |
| 12/1/2010 00:49:01  | 27.1753 |
| 12/1/2010 01:09:01  | 27.1753 |
| 12/1/2010 01:29:01  | 27.1753 |
| 12/1/2010 01:49:01  | 27.1753 |
| 12/1/2010 02:09:01  | 27.1123 |
| 12/1/2010 02:29:01  | 27.1123 |
| 12/1/2010 02:49:01  | 27.1123 |
| 12/1/2010 03:09:01  | 27.1123 |
| 12/1/2010 03:29:01  | 27.0503 |
| 12/1/2010 03:49:01  | 27.0503 |
| 12/1/2010 04:09:01  | 27.0503 |
| 12/1/2010 04:29:01  | 26.9873 |
| 12/1/2010 04:49:01  | 26.9873 |
| 12/1/2010 05:09:01  | 26.9873 |
| 12/1/2010 05:29:01  | 26.9253 |
| 12/1/2010 05:49:01  | 26.9253 |
| 12/1/2010 06:09:01  | 26.9253 |
| 12/1/2010 06:29:01  | 26.9253 |
| 12/1/2010 06:49:01  | 26.8623 |
| 12/1/2010 07:09:01  | 26.8623 |

weight: 413g

T14 adult male, weight: 781g

| T07 Tb time        | T07 Tb | T14 Ta time         | T14 Ta | T14 Tb time         | T14 Tb |
|--------------------|--------|---------------------|--------|---------------------|--------|
| 3/17/2010 12:13:00 | 31.5   | 11/9/2010 17:05:01  | 34.719 | 11/9/2010 17:13:01  | 31.617 |
| 3/17/2010 12:48:00 | 31.5   | 11/9/2010 17:25:01  | 33.597 | 11/9/2010 17:49:01  | 31.118 |
| 3/17/2010 13:23:00 | 31.5   | 11/9/2010 17:45:01  | 32.475 | 11/9/2010 18:25:01  | 31.617 |
| 3/17/2010 13:58:00 | 31.5   | 11/9/2010 18:05:01  | 31.415 | 11/9/2010 19:01:01  | 31.617 |
| 3/17/2010 14:33:00 | 32.0   | 11/9/2010 18:25:01  | 29.731 | 11/9/2010 19:37:01  | 32.116 |
| 3/17/2010 15:08:00 | 32.0   | 11/9/2010 18:45:01  | 28.420 | 11/9/2010 20:13:01  | 32.116 |
| 3/17/2010 15:43:00 | 32.0   | 11/9/2010 19:05:01  | 27.483 | 11/9/2010 20:49:01  | 32.615 |
| 3/17/2010 16:18:00 | 32.0   | 11/9/2010 19:25:01  | 26.609 | 11/9/2010 21:25:01  | 33.113 |
| 3/17/2010 16:53:00 | 32.0   | 11/9/2010 19:45:01  | 26.359 | 11/9/2010 22:01:01  | 33.113 |
| 3/17/2010 17:28:00 | 32.5   | 11/9/2010 20:05:01  | 27.358 | 11/9/2010 22:37:01  | 33.113 |
| 3/17/2010 18:03:00 | 32.0   | 11/9/2010 20:25:01  | 27.920 | 11/9/2010 23:13:01  | 33.113 |
| 3/17/2010 18:38:00 | 32.0   | 11/9/2010 20:45:01  | 27.983 | 11/9/2010 23:49:01  | 33.612 |
| 3/17/2010 19:13:00 | 31.5   | 11/9/2010 21:05:01  | 27.983 | 11/10/2010 00:25:01 | 33.113 |
| 3/17/2010 19:48:00 | 31.5   | 11/9/2010 21:25:01  | 27.546 | 11/10/2010 01:01:01 | 33.113 |
| 3/17/2010 20:23:00 | 31.5   | 11/9/2010 21:45:01  | 26.546 | 11/10/2010 01:37:01 | 33.113 |
| 3/17/2010 20:58:00 | 33.5   | 11/9/2010 22:05:01  | 25.672 | 11/10/2010 02:13:01 | 33.113 |
| 3/17/2010 21:33:00 | 33.5   | 11/9/2010 22:25:01  | 24.797 | 11/10/2010 02:49:01 | 33.113 |
| 3/17/2010 22:08:00 | 33.5   | 11/9/2010 22:45:01  | 24.047 | 11/10/2010 03:25:01 | 33.113 |
| 3/17/2010 22:43:00 | 33.5   | 11/9/2010 23:05:01  | 23.547 | 11/10/2010 04:01:01 | 32.615 |
| 3/17/2010 23:18:00 | 33.5   | 11/9/2010 23:25:01  | 23.047 | 11/10/2010 04:37:01 | 32.615 |
| 3/17/2010 23:53:00 | 33.5   | 11/9/2010 23:45:01  | 22.609 | 11/10/2010 05:13:01 | 32.615 |
| 3/18/2010 00:28:00 | 32.5   | 11/10/2010 00:05:01 | 22.171 | 11/10/2010 05:49:01 | 32.116 |
| 3/18/2010 01:03:00 | 31.5   | 11/10/2010 00:25:01 | 21.733 | 11/10/2010 06:25:01 | 32.116 |
| 3/18/2010 01:38:00 | 31.0   | 11/10/2010 00:45:01 | 21.358 | 11/10/2010 07:01:01 | 32.116 |
| 3/18/2010 02:13:00 | 30.5   | 11/10/2010 01:05:01 | 21.045 | 11/10/2010 07:37:01 | 31.617 |
| 3/18/2010 02:48:00 | 30.0   | 11/10/2010 01:25:01 | 20.732 | 11/10/2010 08:13:01 | 31.617 |
| 3/18/2010 03:23:00 | 30.0   | 11/10/2010 01:45:01 | 20.544 | 11/10/2010 08:49:01 | 31.617 |
| 3/18/2010 03:58:00 | 30.0   | 11/10/2010 02:05:01 | 20.169 | 11/10/2010 09:25:01 | 32.116 |
| 3/18/2010 04:33:00 | 30.0   | 11/10/2010 02:25:01 | 19.793 | 11/10/2010 10:01:01 | 32.116 |
| 3/18/2010 05:08:00 | 29.5   | 11/10/2010 02:45:01 | 19.480 | 11/10/2010 10:37:01 | 32.116 |
| 3/18/2010 05:43:00 | 29.5   | 11/10/2010 03:05:01 | 19.042 | 11/10/2010 11:13:01 | 32.615 |
| 3/18/2010 06:18:00 | 29.5   | 11/10/2010 03:25:01 | 18.917 | 11/10/2010 11:49:01 | 32.615 |
| 3/18/2010 06:53:00 | 29.5   | 11/10/2010 03:45:01 | 18.666 | 11/10/2010 12:25:01 | 32.615 |
| 3/18/2010 07:28:00 | 29.5   | 11/10/2010 04:05:01 | 18.541 | 11/10/2010 13:01:01 | 32.615 |
| 3/18/2010 08:03:00 | 29.0   | 11/10/2010 04:25:01 | 18.353 | 11/10/2010 13:37:01 | 32.615 |
| 3/18/2010 08:38:00 | 29.0   | 11/10/2010 04:45:01 | 18.103 | 11/10/2010 14:13:01 | 32.615 |
| 3/18/2010 09:13:00 | 29.0   | 11/10/2010 05:05:01 | 17.978 | 11/10/2010 14:49:01 | 33.113 |
| 3/18/2010 09:48:00 | 28.5   | 11/10/2010 05:25:01 | 18.040 | 11/10/2010 15:25:01 | 33.113 |
| 3/18/2010 10:23:00 | 28.5   | 11/10/2010 05:45:01 | 18.228 | 11/10/2010 16:01:01 | 33.612 |
| 3/18/2010 10:58:00 | 28.5   | 11/10/2010 06:05:01 | 18.792 | 11/10/2010 16:37:01 | 33.612 |
| 3/18/2010 11:33:00 | 28.5   | 11/10/2010 06:25:01 | 20.231 | 11/10/2010 17:13:01 | 33.612 |
| 3/18/2010 12:08:00 | 28.5   | 11/10/2010 06:45:01 | 22.546 | 11/10/2010 17:49:01 | 33.612 |
| 3/18/2010 12:43:00 | 28.5   | 11/10/2010 07:05:01 | 26.172 | 11/10/2010 18:25:01 | 33.113 |
| 3/18/2010 13:18:00 | 28.5   | 11/10/2010 07:25:01 | 28.545 | 11/10/2010 19:01:01 | 33.113 |
| 3/18/2010 13:53:00 | 28.5   | 11/10/2010 07:45:01 | 29.980 | 11/10/2010 19:37:01 | 33.113 |

|                    |      |                     |        |                     |        |
|--------------------|------|---------------------|--------|---------------------|--------|
| 3/18/2010 14:28:00 | 28.5 | 11/10/2010 08:05:01 | 32.538 | 11/10/2010 20:13:01 | 33.612 |
| 3/18/2010 15:03:00 | 28.5 | 11/10/2010 08:25:01 | 32.288 | 11/10/2010 20:49:01 | 33.612 |
| 3/18/2010 15:38:00 | 28.5 | 11/10/2010 08:45:01 | 32.351 | 11/10/2010 21:25:01 | 33.612 |
| 3/18/2010 16:13:00 | 28.5 | 11/10/2010 09:05:01 | 32.974 | 11/10/2010 22:01:01 | 33.612 |
| 3/18/2010 16:48:00 | 28.5 | 11/10/2010 09:25:01 | 34.408 | 11/10/2010 22:37:01 | 33.113 |
| 3/18/2010 17:23:00 | 28.5 | 11/10/2010 09:45:01 | 36.027 | 11/10/2010 23:13:01 | 33.612 |
| 3/18/2010 17:58:00 | 29.0 | 11/10/2010 10:05:01 | 36.214 | 11/10/2010 23:49:01 | 33.612 |
| 3/18/2010 18:33:00 | 29.5 | 11/10/2010 10:25:01 | 36.712 | 11/11/2010 00:25:01 | 33.612 |
| 3/18/2010 19:08:00 | 29.0 | 11/10/2010 10:45:01 | 37.086 | 11/11/2010 01:01:01 | 33.113 |
| 3/18/2010 19:43:00 | 29.5 | 11/10/2010 11:05:01 | 37.397 | 11/11/2010 01:37:01 | 33.113 |
| 3/18/2010 20:18:00 | 30.5 | 11/10/2010 11:25:01 | 38.020 | 11/11/2010 02:13:01 | 33.612 |
| 3/18/2010 20:53:00 | 31.0 | 11/10/2010 11:45:01 | 38.456 | 11/11/2010 02:49:01 | 32.615 |
| 3/18/2010 21:28:00 | 30.5 | 11/10/2010 12:05:01 | 39.513 | 11/11/2010 03:25:01 | 32.615 |
| 3/18/2010 22:03:00 | 29.5 | 11/10/2010 12:25:01 | 39.949 | 11/11/2010 04:01:01 | 32.116 |
| 3/18/2010 22:38:00 | 29.5 | 11/10/2010 12:45:01 | 39.576 | 11/11/2010 04:37:01 | 32.116 |
| 3/18/2010 23:13:00 | 29.0 | 11/10/2010 13:05:01 | 39.824 | 11/11/2010 05:13:01 | 31.617 |
| 3/18/2010 23:48:00 | 29.0 | 11/10/2010 13:25:01 | 39.327 | 11/11/2010 05:49:01 | 31.617 |
| 3/19/2010 00:23:00 | 28.5 | 11/10/2010 13:45:01 | 39.576 | 11/11/2010 06:25:01 | 31.617 |
| 3/19/2010 00:58:00 | 28.5 | 11/10/2010 14:05:01 | 40.322 | 11/11/2010 07:01:01 | 31.118 |
| 3/19/2010 01:33:00 | 28.5 | 11/10/2010 14:25:01 | 39.762 | 11/11/2010 07:37:01 | 31.617 |
| 3/19/2010 02:08:00 | 28.5 | 11/10/2010 14:45:01 | 38.207 | 11/11/2010 08:13:01 | 31.617 |
| 3/19/2010 02:43:00 | 28.5 | 11/10/2010 15:05:01 | 37.771 | 11/11/2010 08:49:01 | 31.617 |
| 3/19/2010 03:18:00 | 28.5 | 11/10/2010 15:25:01 | 37.273 | 11/11/2010 09:25:01 | 31.617 |
| 3/19/2010 03:53:00 | 28.0 | 11/10/2010 15:45:01 | 36.962 | 11/11/2010 10:01:01 | 31.617 |
| 3/19/2010 04:28:00 | 28.0 | 11/10/2010 16:05:01 | 36.650 | 11/11/2010 10:37:01 | 31.617 |
| 3/19/2010 05:03:00 | 28.0 | 11/10/2010 16:25:01 | 36.276 | 11/11/2010 11:13:01 | 31.118 |
| 3/19/2010 05:38:00 | 28.0 | 11/10/2010 16:45:01 | 35.280 | 11/11/2010 11:49:01 | 31.118 |
| 3/19/2010 06:13:00 | 28.5 | 11/10/2010 17:05:01 | 34.408 | 11/11/2010 12:25:01 | 31.118 |
| 3/19/2010 06:48:00 | 28.5 | 11/10/2010 17:25:01 | 32.974 | 11/11/2010 13:01:01 | 31.118 |
| 3/19/2010 07:23:00 | 28.0 | 11/10/2010 17:45:01 | 31.852 | 11/11/2010 13:37:01 | 31.118 |
| 3/19/2010 07:58:00 | 28.0 | 11/10/2010 18:05:01 | 30.292 | 11/11/2010 14:13:01 | 31.118 |
| 3/19/2010 08:33:00 | 28.0 | 11/10/2010 18:25:01 | 28.794 | 11/11/2010 14:49:01 | 31.617 |
| 3/19/2010 09:08:00 | 28.0 | 11/10/2010 18:45:01 | 27.483 | 11/11/2010 15:25:01 | 31.617 |
| 3/19/2010 09:43:00 | 28.0 | 11/10/2010 19:05:01 | 26.671 | 11/11/2010 16:01:01 | 32.116 |
| 3/19/2010 10:18:00 | 28.0 | 11/10/2010 19:25:01 | 26.234 | 11/11/2010 16:37:01 | 32.116 |
| 3/19/2010 10:53:00 | 28.0 | 11/10/2010 19:45:01 | 25.859 | 11/11/2010 17:13:01 | 32.116 |
| 3/19/2010 11:28:00 | 28.0 | 11/10/2010 20:05:01 | 25.359 | 11/11/2010 17:49:01 | 32.116 |
| 3/19/2010 12:03:00 | 28.0 | 11/10/2010 20:25:01 | 24.859 | 11/11/2010 18:25:01 | 32.615 |
| 3/19/2010 12:38:00 | 28.0 | 11/10/2010 20:45:01 | 24.484 | 11/11/2010 19:01:01 | 32.615 |
| 3/19/2010 13:13:00 | 28.0 | 11/10/2010 21:05:01 | 24.047 | 11/11/2010 19:37:01 | 32.615 |
| 3/19/2010 13:48:00 | 28.0 | 11/10/2010 21:25:01 | 23.484 | 11/11/2010 20:13:01 | 32.615 |
| 3/19/2010 14:23:00 | 28.0 | 11/10/2010 21:45:01 | 22.921 | 11/11/2010 20:49:01 | 32.615 |
| 3/19/2010 14:58:00 | 28.0 | 11/10/2010 22:05:01 | 22.671 | 11/11/2010 21:25:01 | 32.615 |
| 3/19/2010 15:33:00 | 28.5 | 11/10/2010 22:25:01 | 22.359 | 11/11/2010 22:01:01 | 32.615 |
| 3/19/2010 16:08:00 | 28.5 | 11/10/2010 22:45:01 | 22.171 | 11/11/2010 22:37:01 | 33.113 |
| 3/19/2010 16:43:00 | 28.0 | 11/10/2010 23:05:01 | 21.796 | 11/11/2010 23:13:01 | 33.612 |
| 3/19/2010 17:18:00 | 28.0 | 11/10/2010 23:25:01 | 21.671 | 11/11/2010 23:49:01 | 33.612 |
| 3/19/2010 17:53:00 | 28.0 | 11/10/2010 23:45:01 | 21.608 | 11/12/2010 00:25:01 | 33.612 |
| 3/19/2010 18:28:00 | 28.5 | 11/11/2010 00:05:01 | 21.483 | 11/12/2010 01:01:01 | 33.113 |
| 3/19/2010 19:03:00 | 28.0 | 11/11/2010 00:25:01 | 21.107 | 11/12/2010 01:37:01 | 33.612 |



|                    |      |                     |        |                     |        |
|--------------------|------|---------------------|--------|---------------------|--------|
| 3/19/2010 19:38:00 | 28.0 | 11/11/2010 00:45:01 | 20.544 | 11/12/2010 02:13:01 | 33.113 |
| 3/19/2010 20:13:00 | 28.0 | 11/11/2010 01:05:01 | 20.106 | 11/12/2010 02:49:01 | 33.113 |
| 3/19/2010 20:48:00 | 28.0 | 11/11/2010 01:25:01 | 19.668 | 11/12/2010 03:25:01 | 33.113 |
| 3/19/2010 21:23:00 | 28.0 | 11/11/2010 01:45:01 | 19.230 | 11/12/2010 04:01:01 | 33.113 |
| 3/19/2010 21:58:00 | 28.0 | 11/11/2010 02:05:01 | 18.729 | 11/12/2010 04:37:01 | 32.615 |
| 3/19/2010 22:33:00 | 29.0 | 11/11/2010 02:25:01 | 18.040 | 11/12/2010 05:13:01 | 32.116 |
| 3/19/2010 23:08:00 | 30.0 | 11/11/2010 02:45:01 | 17.602 | 11/12/2010 05:49:01 | 32.116 |
| 3/19/2010 23:43:00 | 30.5 | 11/11/2010 03:05:01 | 17.226 | 11/12/2010 06:25:01 | 31.617 |
| 3/20/2010 00:18:00 | 30.5 | 11/11/2010 03:25:01 | 17.289 | 11/12/2010 07:01:01 | 31.617 |
| 3/20/2010 00:53:00 | 30.0 | 11/11/2010 03:45:01 | 17.539 | 11/12/2010 07:37:01 | 31.617 |
| 3/20/2010 01:28:00 | 29.5 | 11/11/2010 04:05:01 | 17.790 | 11/12/2010 08:13:01 | 31.617 |
| 3/20/2010 02:03:00 | 29.0 | 11/11/2010 04:25:01 | 17.414 | 11/12/2010 08:49:01 | 31.118 |
| 3/20/2010 02:38:00 | 29.0 | 11/11/2010 04:45:01 | 17.351 | 11/12/2010 09:25:01 | 31.617 |
| 3/20/2010 03:13:00 | 28.5 | 11/11/2010 05:05:01 | 17.351 | 11/12/2010 10:01:01 | 31.617 |
| 3/20/2010 03:48:00 | 28.5 | 11/11/2010 05:25:01 | 17.226 | 11/12/2010 10:37:01 | 31.617 |
| 3/20/2010 04:23:00 | 28.5 | 11/11/2010 05:45:01 | 17.477 | 11/12/2010 11:13:01 | 31.617 |
| 3/20/2010 04:58:00 | 28.0 | 11/11/2010 06:05:01 | 19.167 | 11/12/2010 11:49:01 | 31.617 |
| 3/20/2010 05:33:00 | 28.0 | 11/11/2010 06:25:01 | 21.545 | 11/12/2010 12:25:01 | 31.617 |
| 3/20/2010 06:08:00 | 28.0 | 11/11/2010 06:45:01 | 24.359 | 11/12/2010 13:01:01 | 31.118 |
| 3/20/2010 06:43:00 | 28.0 | 11/11/2010 07:05:01 | 26.422 | 11/12/2010 13:37:01 | 31.118 |
| 3/20/2010 07:18:00 | 28.0 | 11/11/2010 07:25:01 | 28.170 | 11/12/2010 14:13:01 | 31.617 |
| 3/20/2010 07:53:00 | 28.0 | 11/11/2010 07:45:01 | 29.294 | 11/12/2010 14:49:01 | 32.116 |
| 3/20/2010 08:28:00 | 28.0 | 11/11/2010 08:05:01 | 31.852 | 11/12/2010 15:25:01 | 32.116 |
| 3/20/2010 09:03:00 | 28.0 | 11/11/2010 08:25:01 | 31.914 | 11/12/2010 16:01:01 | 32.615 |
| 3/20/2010 09:38:00 | 28.0 | 11/11/2010 08:45:01 | 32.662 | 11/12/2010 16:37:01 | 32.615 |
| 3/20/2010 10:13:00 | 28.5 | 11/11/2010 09:05:01 | 33.348 | 11/12/2010 17:13:01 | 32.615 |
| 3/20/2010 10:48:00 | 28.0 | 11/11/2010 09:25:01 | 34.470 | 11/12/2010 17:49:01 | 32.615 |
| 3/20/2010 11:23:00 | 28.0 | 11/11/2010 09:45:01 | 36.152 | 11/12/2010 18:25:01 | 32.615 |
| 3/20/2010 11:58:00 | 28.0 | 11/11/2010 10:05:01 | 36.526 | 11/12/2010 19:01:01 | 32.615 |
| 3/20/2010 12:33:00 | 28.0 | 11/11/2010 10:25:01 | 36.775 | 11/12/2010 19:37:01 | 32.615 |
| 3/20/2010 13:08:00 | 28.0 | 11/11/2010 10:45:01 | 35.529 | 11/12/2010 20:13:01 | 32.615 |
| 3/20/2010 13:43:00 | 27.5 | 11/11/2010 11:05:01 | 37.397 | 11/12/2010 20:49:01 | 32.615 |
| 3/20/2010 14:18:00 | 27.5 | 11/11/2010 11:25:01 | 37.771 | 11/12/2010 21:25:01 | 33.113 |
| 3/20/2010 14:53:00 | 27.5 | 11/11/2010 11:45:01 | 38.642 | 11/12/2010 22:01:01 | 33.612 |
| 3/20/2010 15:28:00 | 27.5 | 11/11/2010 12:05:01 | 37.584 | 11/12/2010 22:37:01 | 33.612 |
| 3/20/2010 16:03:00 | 27.5 | 11/11/2010 12:25:01 | 38.393 | 11/12/2010 23:13:01 | 33.612 |
| 3/20/2010 16:38:00 | 28.0 | 11/11/2010 12:45:01 | 38.829 | 11/12/2010 23:49:01 | 33.612 |
| 3/20/2010 17:13:00 | 28.0 | 11/11/2010 13:05:01 | 38.767 | 11/13/2010 00:25:01 | 33.612 |
| 3/20/2010 17:48:00 | 28.0 | 11/11/2010 13:25:01 | 38.580 | 11/13/2010 01:01:01 | 33.612 |
| 3/20/2010 18:23:00 | 28.0 | 11/11/2010 13:45:01 | 39.513 | 11/13/2010 01:37:01 | 33.612 |
| 3/20/2010 18:58:00 | 28.0 | 11/11/2010 14:05:01 | 39.887 | 11/13/2010 02:13:01 | 33.113 |
| 3/20/2010 19:33:00 | 27.5 | 11/11/2010 14:25:01 | 39.140 | 11/13/2010 02:49:01 | 33.113 |
| 3/20/2010 20:08:00 | 27.5 | 11/11/2010 14:45:01 | 39.016 | 11/13/2010 03:25:01 | 33.113 |
| 3/20/2010 20:43:00 | 28.0 | 11/11/2010 15:05:01 | 37.833 | 11/13/2010 04:01:01 | 32.615 |
| 3/20/2010 21:18:00 | 27.5 | 11/11/2010 15:25:01 | 37.335 | 11/13/2010 04:37:01 | 32.615 |
| 3/20/2010 21:53:00 | 27.5 | 11/11/2010 15:45:01 | 36.962 | 11/13/2010 05:13:01 | 32.615 |
| 3/20/2010 22:28:00 | 27.5 | 11/11/2010 16:05:01 | 36.276 | 11/13/2010 05:49:01 | 32.116 |
| 3/20/2010 23:03:00 | 27.5 | 11/11/2010 16:25:01 | 35.778 | 11/13/2010 06:25:01 | 32.116 |
| 3/20/2010 23:38:00 | 27.5 | 11/11/2010 16:45:01 | 35.031 | 11/13/2010 07:01:01 | 32.116 |
| 3/21/2010 00:13:00 | 27.5 | 11/11/2010 17:05:01 | 34.221 | 11/13/2010 07:37:01 | 32.116 |

|                    |      |                     |        |                     |        |
|--------------------|------|---------------------|--------|---------------------|--------|
| 3/21/2010 00:48:00 | 28.0 | 11/11/2010 17:25:01 | 33.223 | 11/13/2010 08:13:01 | 32.116 |
| 3/21/2010 01:23:00 | 28.0 | 11/11/2010 17:45:01 | 32.288 | 11/13/2010 08:49:01 | 32.116 |
| 3/21/2010 01:58:00 | 27.5 | 11/11/2010 18:05:01 | 31.103 | 11/13/2010 09:25:01 | 32.116 |
| 3/21/2010 02:33:00 | 27.5 | 11/11/2010 18:25:01 | 29.606 | 11/13/2010 10:01:01 | 31.617 |
| 3/21/2010 03:08:00 | 27.5 | 11/11/2010 18:45:01 | 28.482 | 11/13/2010 10:37:01 | 31.617 |
| 3/21/2010 03:43:00 | 27.5 | 11/11/2010 19:05:01 | 28.982 | 11/13/2010 11:13:01 | 31.617 |
| 3/21/2010 04:18:00 | 27.5 | 11/11/2010 19:25:01 | 29.044 | 11/13/2010 11:49:01 | 31.617 |
| 3/21/2010 04:53:00 | 27.5 | 11/11/2010 19:45:01 | 28.732 | 11/13/2010 12:25:01 | 31.617 |
| 3/21/2010 05:28:00 | 27.5 | 11/11/2010 20:05:01 | 28.607 | 11/13/2010 13:01:01 | 31.617 |
| 3/21/2010 06:03:00 | 27.5 | 11/11/2010 20:25:01 | 28.295 | 11/13/2010 13:37:01 | 31.617 |
| 3/21/2010 06:38:00 | 27.5 | 11/11/2010 20:45:01 | 28.233 | 11/13/2010 14:13:01 | 32.116 |
| 3/21/2010 07:13:00 | 27.5 | 11/11/2010 21:05:01 | 27.858 | 11/13/2010 14:49:01 | 32.116 |
| 3/21/2010 07:48:00 | 27.5 | 11/11/2010 21:25:01 | 27.171 | 11/13/2010 15:25:01 | 32.116 |
| 3/21/2010 08:23:00 | 27.5 | 11/11/2010 21:45:01 | 26.671 | 11/13/2010 16:01:01 | 32.116 |
| 3/21/2010 08:58:00 | 27.5 | 11/11/2010 22:05:01 | 26.109 | 11/13/2010 16:37:01 | 32.116 |
| 3/21/2010 09:33:00 | 27.5 | 11/11/2010 22:25:01 | 25.422 | 11/13/2010 17:13:01 | 32.116 |
| 3/21/2010 10:08:00 | 27.5 | 11/11/2010 22:45:01 | 24.484 | 11/13/2010 17:49:01 | 32.116 |
| 3/21/2010 10:43:00 | 27.5 | 11/11/2010 23:05:01 | 24.109 | 11/13/2010 18:25:01 | 32.615 |
| 3/21/2010 11:18:00 | 27.5 | 11/11/2010 23:25:01 | 23.422 | 11/13/2010 19:01:01 | 32.116 |
| 3/21/2010 11:53:00 | 27.5 | 11/11/2010 23:45:01 | 22.671 | 11/13/2010 19:37:01 | 32.116 |
| 3/21/2010 12:28:00 | 27.5 | 11/12/2010 00:05:01 | 21.983 | 11/13/2010 20:13:01 | 32.116 |
| 3/21/2010 13:03:00 | 27.0 | 11/12/2010 00:25:01 | 21.358 | 11/13/2010 20:49:01 | 32.116 |
| 3/21/2010 13:38:00 | 27.5 | 11/12/2010 00:45:01 | 20.669 | 11/13/2010 21:25:01 | 31.617 |
| 3/21/2010 14:13:00 | 27.5 | 11/12/2010 01:05:01 | 20.044 | 11/13/2010 22:01:01 | 31.617 |
| 3/21/2010 14:48:00 | 27.5 | 11/12/2010 01:25:01 | 19.543 | 11/13/2010 22:37:01 | 32.116 |
| 3/21/2010 15:23:00 | 27.5 | 11/12/2010 01:45:01 | 19.167 | 11/13/2010 23:13:01 | 30.619 |
| 3/21/2010 15:58:00 | 27.5 | 11/12/2010 02:05:01 | 18.917 | 11/13/2010 23:49:01 | 31.118 |
| 3/21/2010 16:33:00 | 27.5 | 11/12/2010 02:25:01 | 18.479 | 11/14/2010 00:25:01 | 31.617 |
| 3/21/2010 17:08:00 | 27.5 | 11/12/2010 02:45:01 | 17.978 | 11/14/2010 01:01:01 | 31.617 |
| 3/21/2010 17:43:00 | 27.5 | 11/12/2010 03:05:01 | 17.602 | 11/14/2010 01:37:01 | 31.617 |
| 3/21/2010 18:18:00 | 27.5 | 11/12/2010 03:25:01 | 17.163 | 11/14/2010 02:13:01 | 32.615 |
| 3/21/2010 18:53:00 | 28.0 | 11/12/2010 03:45:01 | 16.850 | 11/14/2010 02:49:01 | 33.113 |
| 3/21/2010 19:28:00 | 28.0 | 11/12/2010 04:05:01 | 17.038 | 11/14/2010 03:25:01 | 33.113 |
| 3/21/2010 20:03:00 | 29.0 | 11/12/2010 04:25:01 | 17.351 | 11/14/2010 04:01:01 | 33.113 |
| 3/21/2010 20:38:00 | 30.0 | 11/12/2010 04:45:01 | 17.477 | 11/14/2010 04:37:01 | 33.113 |
| 3/21/2010 21:13:00 | 30.5 | 11/12/2010 05:05:01 | 17.289 | 11/14/2010 05:13:01 | 33.113 |
| 3/21/2010 21:48:00 | 30.0 | 11/12/2010 05:25:01 | 17.414 | 11/14/2010 05:49:01 | 32.615 |
| 3/21/2010 22:23:00 | 29.5 | 11/12/2010 05:45:01 | 17.852 | 11/14/2010 06:25:01 | 32.615 |
| 3/21/2010 22:58:00 | 29.0 | 11/12/2010 06:05:01 | 19.293 | 11/14/2010 07:01:01 | 32.615 |
| 3/21/2010 23:33:00 | 28.5 | 11/12/2010 06:25:01 | 21.045 | 11/14/2010 07:37:01 | 32.615 |
| 3/22/2010 00:08:00 | 28.5 | 11/12/2010 06:45:01 | 24.172 | 11/14/2010 08:13:01 | 32.615 |
| 3/22/2010 00:43:00 | 28.5 | 11/12/2010 07:05:01 | 26.359 | 11/14/2010 08:49:01 | 32.615 |
| 3/22/2010 01:18:00 | 28.0 | 11/12/2010 07:25:01 | 27.733 | 11/14/2010 09:25:01 | 32.615 |
| 3/22/2010 01:53:00 | 28.0 | 11/12/2010 07:45:01 | 28.794 | 11/14/2010 10:01:01 | 32.615 |
| 3/22/2010 02:28:00 | 28.0 | 11/12/2010 08:05:01 | 31.041 | 11/14/2010 10:37:01 | 32.615 |
| 3/22/2010 03:03:00 | 28.0 | 11/12/2010 08:25:01 | 31.789 | 11/14/2010 11:13:01 | 32.116 |
| 3/22/2010 03:38:00 | 28.0 | 11/12/2010 08:45:01 | 32.163 | 11/14/2010 11:49:01 | 32.116 |
| 3/22/2010 04:13:00 | 27.5 | 11/12/2010 09:05:01 | 32.600 | 11/14/2010 12:25:01 | 32.116 |
| 3/22/2010 04:48:00 | 27.5 | 11/12/2010 09:25:01 | 33.909 | 11/14/2010 13:01:01 | 32.116 |
| 3/22/2010 05:23:00 | 28.0 | 11/12/2010 09:45:01 | 36.152 | 11/14/2010 13:37:01 | 32.116 |

|                    |                          |                            |        |
|--------------------|--------------------------|----------------------------|--------|
| 3/22/2010 05:58:00 | 27.5 11/12/2010 10:05:01 | 36.526 11/14/2010 14:13:01 | 32.116 |
| 3/22/2010 06:33:00 | 27.5 11/12/2010 10:25:01 | 36.899 11/14/2010 14:49:01 | 32.116 |
| 3/22/2010 07:08:00 | 27.5 11/12/2010 10:45:01 | 37.460 11/14/2010 15:25:01 | 32.116 |
| 3/22/2010 07:43:00 | 27.5 11/12/2010 11:05:01 | 38.020 11/14/2010 16:01:01 | 32.116 |
| 3/22/2010 08:18:00 | 27.5 11/12/2010 11:25:01 | 38.331 11/14/2010 16:37:01 | 32.116 |
| 3/22/2010 08:53:00 | 27.5 11/12/2010 11:45:01 | 39.078 11/14/2010 17:13:01 | 32.116 |
| 3/22/2010 09:28:00 | 27.5 11/12/2010 12:05:01 | 39.824 11/14/2010 17:49:01 | 32.615 |
| 3/22/2010 10:03:00 | 27.5 11/12/2010 12:25:01 | 39.887 11/14/2010 18:25:01 | 32.615 |
| 3/22/2010 10:38:00 | 27.5 11/12/2010 12:45:01 | 39.202 11/14/2010 19:01:01 | 32.615 |
| 3/22/2010 11:13:00 | 27.5 11/12/2010 13:05:01 | 39.265 11/14/2010 19:37:01 | 32.615 |
| 3/22/2010 11:48:00 | 27.5 11/12/2010 13:25:01 | 39.762 11/14/2010 20:13:01 | 32.615 |
| 3/22/2010 12:23:00 | 27.5 11/12/2010 13:45:01 | 39.389 11/14/2010 20:49:01 | 33.113 |
| 3/22/2010 12:58:00 | 27.5 11/12/2010 14:05:01 | 39.762 11/14/2010 21:25:01 | 33.113 |
| 3/22/2010 13:33:00 | 28.0 11/12/2010 14:25:01 | 39.949 11/14/2010 22:01:01 | 33.612 |
| 3/22/2010 14:08:00 | 28.0 11/12/2010 14:45:01 | 38.393 11/14/2010 22:37:01 | 34.110 |
| 3/22/2010 14:43:00 | 28.0 11/12/2010 15:05:01 | 37.584 11/14/2010 23:13:01 | 33.113 |
| 3/22/2010 15:18:00 | 28.0 11/12/2010 15:25:01 | 37.397 11/14/2010 23:49:01 | 33.113 |
| 3/22/2010 15:53:00 | 28.0 11/12/2010 15:45:01 | 36.899 11/15/2010 00:25:01 | 33.113 |
| 3/22/2010 16:28:00 | 28.0 11/12/2010 16:05:01 | 36.339 11/15/2010 01:01:01 | 33.612 |
| 3/22/2010 17:03:00 | 28.0 11/12/2010 16:25:01 | 35.903 11/15/2010 01:37:01 | 33.612 |
| 3/22/2010 17:38:00 | 28.0 11/12/2010 16:45:01 | 35.093 11/15/2010 02:13:01 | 34.110 |
| 3/22/2010 18:13:00 | 28.0 11/12/2010 17:05:01 | 34.034 11/15/2010 02:49:01 | 34.110 |
| 3/22/2010 18:48:00 | 28.0 11/12/2010 17:25:01 | 32.413 11/15/2010 03:25:01 | 33.113 |
| 3/22/2010 19:23:00 | 28.0 11/12/2010 17:45:01 | 31.103 11/15/2010 04:01:01 | 32.615 |
| 3/22/2010 19:58:00 | 28.0 11/12/2010 18:05:01 | 29.731 11/15/2010 04:37:01 | 32.615 |
| 3/22/2010 20:33:00 | 28.0 11/12/2010 18:25:01 | 28.233 11/15/2010 05:13:01 | 32.615 |
| 3/22/2010 21:08:00 | 28.0 11/12/2010 18:45:01 | 27.358 11/15/2010 05:49:01 | 32.615 |
| 3/22/2010 21:43:00 | 27.5 11/12/2010 19:05:01 | 27.358 11/15/2010 06:25:01 | 32.116 |
| 3/22/2010 22:18:00 | 28.0 11/12/2010 19:25:01 | 27.920 11/15/2010 07:01:01 | 32.116 |
| 3/22/2010 22:53:00 | 28.0 11/12/2010 19:45:01 | 28.045 11/15/2010 07:37:01 | 32.116 |
| 3/22/2010 23:28:00 | 28.0 11/12/2010 20:05:01 | 28.170 11/15/2010 08:13:01 | 32.116 |
| 3/23/2010 00:03:00 | 27.5 11/12/2010 20:25:01 | 28.108 11/15/2010 08:49:01 | 32.116 |
| 3/23/2010 00:38:00 | 27.5 11/12/2010 20:45:01 | 27.796 11/15/2010 09:25:01 | 32.116 |
| 3/23/2010 01:13:00 | 27.5 11/12/2010 21:05:01 | 26.984 11/15/2010 10:01:01 | 32.116 |
| 3/23/2010 01:48:00 | 28.0 11/12/2010 21:25:01 | 25.984 11/15/2010 10:37:01 | 32.615 |
| 3/23/2010 02:23:00 | 28.0 11/12/2010 21:45:01 | 25.172 11/15/2010 11:13:01 | 32.615 |
| 3/23/2010 02:58:00 | 27.5 11/12/2010 22:05:01 | 24.547 11/15/2010 11:49:01 | 33.113 |
| 3/23/2010 03:33:00 | 27.5 11/12/2010 22:25:01 | 23.797 11/15/2010 12:25:01 | 33.113 |
| 3/23/2010 04:08:00 | 27.5 11/12/2010 22:45:01 | 22.984 11/15/2010 13:01:01 | 32.615 |
| 3/23/2010 04:43:00 | 27.5 11/12/2010 23:05:01 | 22.421 11/15/2010 13:37:01 | 32.615 |
| 3/23/2010 05:18:00 | 27.5 11/12/2010 23:25:01 | 21.796 11/15/2010 14:13:01 | 33.113 |
| 3/23/2010 05:53:00 | 27.5 11/12/2010 23:45:01 | 21.295 11/15/2010 14:49:01 | 33.113 |
| 3/23/2010 06:28:00 | 27.5 11/13/2010 00:05:01 | 20.795 11/15/2010 15:25:01 | 33.113 |
| 3/23/2010 07:03:00 | 27.5 11/13/2010 00:25:01 | 20.294 11/15/2010 16:01:01 | 33.113 |
| 3/23/2010 07:38:00 | 27.5 11/13/2010 00:45:01 | 19.793 11/15/2010 16:37:01 | 33.113 |
| 3/23/2010 08:13:00 | 27.5 11/13/2010 01:05:01 | 19.167 11/15/2010 17:13:01 | 33.113 |
| 3/23/2010 08:48:00 | 27.5 11/13/2010 01:25:01 | 18.729 11/15/2010 17:49:01 | 33.113 |
| 3/23/2010 09:23:00 | 27.5 11/13/2010 01:45:01 | 18.228 11/15/2010 18:25:01 | 32.615 |
| 3/23/2010 09:58:00 | 27.5 11/13/2010 02:05:01 | 17.978 11/15/2010 19:01:01 | 32.615 |
| 3/23/2010 10:33:00 | 27.5 11/13/2010 02:25:01 | 17.539 11/15/2010 19:37:01 | 32.116 |

|                    |      |                     |        |                     |        |
|--------------------|------|---------------------|--------|---------------------|--------|
| 3/23/2010 11:08:00 | 27.5 | 11/13/2010 02:45:01 | 17.163 | 11/15/2010 20:13:01 | 32.116 |
| 3/23/2010 11:43:00 | 27.5 | 11/13/2010 03:05:01 | 16.850 | 11/15/2010 20:49:01 | 32.116 |
| 3/23/2010 12:18:00 | 27.5 | 11/13/2010 03:25:01 | 16.599 | 11/15/2010 21:25:01 | 32.116 |
| 3/23/2010 12:53:00 | 27.5 | 11/13/2010 03:45:01 | 16.412 | 11/15/2010 22:01:01 | 32.116 |
| 3/23/2010 13:28:00 | 27.5 | 11/13/2010 04:05:01 | 16.036 | 11/15/2010 22:37:01 | 32.116 |
| 3/23/2010 14:03:00 | 27.5 | 11/13/2010 04:25:01 | 15.848 | 11/15/2010 23:13:01 | 32.116 |
| 3/23/2010 14:38:00 | 27.5 | 11/13/2010 04:45:01 | 15.597 | 11/15/2010 23:49:01 | 32.615 |
| 3/23/2010 15:13:00 | 27.5 | 11/13/2010 05:05:01 | 15.409 | 11/16/2010 00:25:01 | 33.113 |
| 3/23/2010 15:48:00 | 27.5 | 11/13/2010 05:25:01 | 15.472 | 11/16/2010 01:01:01 | 33.113 |
| 3/23/2010 16:23:00 | 27.5 | 11/13/2010 05:45:01 | 15.534 | 11/16/2010 01:37:01 | 33.612 |
| 3/23/2010 16:58:00 | 27.5 | 11/13/2010 06:05:01 | 16.161 | 11/16/2010 02:13:01 | 34.110 |
| 3/23/2010 17:33:00 | 27.5 | 11/13/2010 06:25:01 | 17.163 | 11/16/2010 02:49:01 | 34.110 |
| 3/23/2010 18:08:00 | 27.5 | 11/13/2010 06:45:01 | 19.793 | 11/16/2010 03:25:01 | 34.110 |
| 3/23/2010 18:43:00 | 27.5 | 11/13/2010 07:05:01 | 23.359 | 11/16/2010 04:01:01 | 33.113 |
| 3/23/2010 19:18:00 | 27.5 | 11/13/2010 07:25:01 | 26.734 | 11/16/2010 04:37:01 | 32.615 |
| 3/23/2010 19:53:00 | 28.5 | 11/13/2010 07:45:01 | 28.607 | 11/16/2010 05:13:01 | 32.116 |
| 3/23/2010 20:28:00 | 28.0 | 11/13/2010 08:05:01 | 30.292 | 11/16/2010 05:49:01 | 31.617 |
| 3/23/2010 21:03:00 | 28.0 | 11/13/2010 08:25:01 | 31.727 | 11/16/2010 06:25:01 | 31.617 |
| 3/23/2010 21:38:00 | 27.5 | 11/13/2010 08:45:01 | 32.101 | 11/16/2010 07:01:01 | 31.118 |
| 3/23/2010 22:13:00 | 27.5 | 11/13/2010 09:05:01 | 33.286 | 11/16/2010 07:37:01 | 31.118 |
| 3/23/2010 22:48:00 | 27.5 | 11/13/2010 09:25:01 | 33.784 | 11/16/2010 08:13:01 | 31.118 |
| 3/23/2010 23:23:00 | 27.5 | 11/13/2010 09:45:01 | 33.036 | 11/16/2010 08:49:01 | 31.118 |
| 3/23/2010 23:58:00 | 27.5 | 11/13/2010 10:05:01 | 36.152 | 11/16/2010 09:25:01 | 30.619 |
| 3/24/2010 00:33:00 | 27.5 | 11/13/2010 10:25:01 | 36.712 | 11/16/2010 10:01:01 | 31.118 |
| 3/24/2010 01:08:00 | 27.5 | 11/13/2010 10:45:01 | 37.895 | 11/16/2010 10:37:01 | 32.116 |
| 3/24/2010 01:43:00 | 27.5 | 11/13/2010 11:05:01 | 37.646 | 11/16/2010 11:13:01 | 32.615 |
| 3/24/2010 02:18:00 | 27.5 | 11/13/2010 11:25:01 | 38.393 | 11/16/2010 11:49:01 | 33.612 |
| 3/24/2010 02:53:00 | 27.5 | 11/13/2010 11:45:01 | 39.451 | 11/16/2010 12:25:01 | 33.612 |
| 3/24/2010 03:28:00 | 27.5 | 11/13/2010 12:05:01 | 40.136 | 11/16/2010 13:01:01 | 33.612 |
| 3/24/2010 04:03:00 | 27.0 | 11/13/2010 12:25:01 | 40.882 | 11/16/2010 13:37:01 | 33.113 |
| 3/24/2010 04:38:00 | 27.0 | 11/13/2010 12:45:01 | 39.327 | 11/16/2010 14:13:01 | 33.612 |
| 3/24/2010 05:13:00 | 27.0 | 11/13/2010 13:05:01 | 39.265 | 11/16/2010 14:49:01 | 33.113 |
| 3/24/2010 05:48:00 | 27.0 | 11/13/2010 13:25:01 | 37.646 | 11/16/2010 15:25:01 | 33.113 |
| 3/24/2010 06:23:00 | 27.0 | 11/13/2010 13:45:01 | 38.953 | 11/16/2010 16:01:01 | 33.113 |
| 3/24/2010 06:58:00 | 27.0 | 11/13/2010 14:05:01 | 39.265 | 11/16/2010 16:37:01 | 33.113 |
| 3/24/2010 07:33:00 | 27.0 | 11/13/2010 14:25:01 | 39.327 | 11/16/2010 17:13:01 | 33.113 |
| 3/24/2010 08:08:00 | 27.0 | 11/13/2010 14:45:01 | 37.958 | 11/16/2010 17:49:01 | 33.113 |
| 3/24/2010 08:43:00 | 27.0 | 11/13/2010 15:05:01 | 36.899 | 11/16/2010 18:25:01 | 33.113 |
| 3/24/2010 09:18:00 | 27.0 | 11/13/2010 15:25:01 | 36.899 | 11/16/2010 19:01:01 | 32.615 |
| 3/24/2010 09:53:00 | 27.0 | 11/13/2010 15:45:01 | 35.654 | 11/16/2010 19:37:01 | 32.615 |
| 3/24/2010 10:28:00 | 27.0 | 11/13/2010 16:05:01 | 35.031 | 11/16/2010 20:13:01 | 32.615 |
| 3/24/2010 11:03:00 | 27.0 | 11/13/2010 16:25:01 | 34.719 | 11/16/2010 20:49:01 | 32.615 |
| 3/24/2010 11:38:00 | 27.0 | 11/13/2010 16:45:01 | 34.034 | 11/16/2010 21:25:01 | 32.615 |
| 3/24/2010 12:13:00 | 27.0 | 11/13/2010 17:05:01 | 33.223 | 11/16/2010 22:01:01 | 32.615 |
| 3/24/2010 12:48:00 | 27.0 | 11/13/2010 17:25:01 | 32.288 | 11/16/2010 22:37:01 | 32.615 |
| 3/24/2010 13:23:00 | 27.0 | 11/13/2010 17:45:01 | 30.729 | 11/16/2010 23:13:01 | 32.116 |
| 3/24/2010 13:58:00 | 27.5 | 11/13/2010 18:05:01 | 29.231 | 11/16/2010 23:49:01 | 32.116 |
| 3/24/2010 14:33:00 | 28.5 | 11/13/2010 18:25:01 | 27.733 | 11/17/2010 00:25:01 | 32.615 |
| 3/24/2010 15:08:00 | 28.5 | 11/13/2010 18:45:01 | 26.546 | 11/17/2010 01:01:01 | 33.612 |
| 3/24/2010 15:43:00 | 28.0 | 11/13/2010 19:05:01 | 25.797 | 11/17/2010 01:37:01 | 33.612 |

|                    |      |                     |        |                     |        |
|--------------------|------|---------------------|--------|---------------------|--------|
| 3/24/2010 16:18:00 | 28.0 | 11/13/2010 19:25:01 | 25.109 | 11/17/2010 02:13:01 | 34.110 |
| 3/24/2010 16:53:00 | 28.0 | 11/13/2010 19:45:01 | 24.609 | 11/17/2010 02:49:01 | 34.110 |
| 3/24/2010 17:28:00 | 27.5 | 11/13/2010 20:05:01 | 24.234 | 11/17/2010 03:25:01 | 34.110 |
| 3/24/2010 18:03:00 | 27.5 | 11/13/2010 20:25:01 | 24.484 | 11/17/2010 04:01:01 | 34.608 |
| 3/24/2010 18:38:00 | 27.5 | 11/13/2010 20:45:01 | 24.984 | 11/17/2010 04:37:01 | 35.107 |
| 3/24/2010 19:13:00 | 27.5 | 11/13/2010 21:05:01 | 25.172 | 11/17/2010 05:13:01 | 34.608 |
| 3/24/2010 19:48:00 | 27.5 | 11/13/2010 21:25:01 | 24.922 | 11/17/2010 05:49:01 | 33.113 |
| 3/24/2010 20:23:00 | 27.5 | 11/13/2010 21:45:01 | 24.422 | 11/17/2010 06:25:01 | 32.116 |
| 3/24/2010 20:58:00 | 27.5 | 11/13/2010 22:05:01 | 23.922 | 11/17/2010 07:01:01 | 31.617 |
| 3/24/2010 21:33:00 | 27.5 | 11/13/2010 22:25:01 | 23.609 | 11/17/2010 07:37:01 | 31.617 |
| 3/24/2010 22:08:00 | 27.5 | 11/13/2010 22:45:01 | 23.234 | 11/17/2010 08:13:01 | 31.118 |
| 3/24/2010 22:43:00 | 27.5 | 11/13/2010 23:05:01 | 22.796 | 11/17/2010 08:49:01 | 31.118 |
| 3/24/2010 23:18:00 | 27.5 | 11/13/2010 23:25:01 | 22.359 | 11/17/2010 09:25:01 | 30.619 |
| 3/24/2010 23:53:00 | 27.5 | 11/13/2010 23:45:01 | 21.983 | 11/17/2010 10:01:01 | 30.619 |
| 3/25/2010 00:28:00 | 27.5 | 11/14/2010 00:05:01 | 21.483 | 11/17/2010 10:37:01 | 30.619 |
| 3/25/2010 01:03:00 | 27.5 | 11/14/2010 00:25:01 | 21.045 | 11/17/2010 11:13:01 | 30.619 |
| 3/25/2010 01:38:00 | 27.5 | 11/14/2010 00:45:01 | 20.419 | 11/17/2010 11:49:01 | 30.619 |
| 3/25/2010 02:13:00 | 27.5 | 11/14/2010 01:05:01 | 20.044 | 11/17/2010 12:25:01 | 30.619 |
| 3/25/2010 02:48:00 | 27.5 | 11/14/2010 01:25:01 | 19.355 | 11/17/2010 13:01:01 | 30.619 |
| 3/25/2010 03:23:00 | 27.5 | 11/14/2010 01:45:01 | 18.979 | 11/17/2010 13:37:01 | 31.118 |
| 3/25/2010 03:58:00 | 27.5 | 11/14/2010 02:05:01 | 18.291 | 11/17/2010 14:13:01 | 31.118 |
| 3/25/2010 04:33:00 | 27.5 | 11/14/2010 02:25:01 | 17.852 | 11/17/2010 14:49:01 | 31.617 |
| 3/25/2010 05:08:00 | 27.5 | 11/14/2010 02:45:01 | 17.477 | 11/17/2010 15:25:01 | 32.116 |
| 3/25/2010 05:43:00 | 27.5 | 11/14/2010 03:05:01 | 17.163 | 11/17/2010 16:01:01 | 32.116 |
| 3/25/2010 06:18:00 | 27.5 | 11/14/2010 03:25:01 | 16.787 | 11/17/2010 16:37:01 | 32.116 |
| 3/25/2010 06:53:00 | 27.0 | 11/14/2010 03:45:01 | 16.474 | 11/17/2010 17:13:01 | 32.116 |
| 3/25/2010 07:28:00 | 27.0 | 11/14/2010 04:05:01 | 16.224 | 11/17/2010 17:49:01 | 32.116 |
| 3/25/2010 08:03:00 | 27.0 | 11/14/2010 04:25:01 | 15.910 | 11/17/2010 18:25:01 | 31.617 |
| 3/25/2010 08:38:00 | 27.0 | 11/14/2010 04:45:01 | 15.597 | 11/17/2010 19:01:01 | 32.116 |
| 3/25/2010 09:13:00 | 27.0 | 11/14/2010 05:05:01 | 15.283 | 11/17/2010 19:37:01 | 32.116 |
| 3/25/2010 09:48:00 | 27.0 | 11/14/2010 05:25:01 | 15.221 | 11/17/2010 20:13:01 | 32.116 |
| 3/25/2010 10:23:00 | 27.0 | 11/14/2010 05:45:01 | 15.409 | 11/17/2010 20:49:01 | 32.116 |
| 3/25/2010 10:58:00 | 27.0 | 11/14/2010 06:05:01 | 16.286 | 11/17/2010 21:25:01 | 32.615 |
| 3/25/2010 11:33:00 | 27.0 | 11/14/2010 06:25:01 | 18.416 | 11/17/2010 22:01:01 | 32.615 |
| 3/25/2010 12:08:00 | 27.0 | 11/14/2010 06:45:01 | 22.046 | 11/17/2010 22:37:01 | 32.615 |
| 3/25/2010 12:43:00 | 27.0 | 11/14/2010 07:05:01 | 25.547 | 11/17/2010 23:13:01 | 32.615 |
| 3/25/2010 13:18:00 | 27.0 | 11/14/2010 07:25:01 | 27.671 | 11/17/2010 23:49:01 | 32.116 |
| 3/25/2010 13:53:00 | 27.5 | 11/14/2010 07:45:01 | 28.982 | 11/18/2010 00:25:01 | 32.116 |
| 3/25/2010 14:28:00 | 27.5 | 11/14/2010 08:05:01 | 30.916 | 11/18/2010 01:01:01 | 32.615 |
| 3/25/2010 15:03:00 | 27.5 | 11/14/2010 08:25:01 | 31.914 | 11/18/2010 01:37:01 | 32.615 |
| 3/25/2010 15:38:00 | 27.5 | 11/14/2010 08:45:01 | 32.226 | 11/18/2010 02:13:01 | 32.615 |
| 3/25/2010 16:13:00 | 27.5 | 11/14/2010 09:05:01 | 32.163 | 11/18/2010 02:49:01 | 32.116 |
| 3/25/2010 16:48:00 | 27.5 | 11/14/2010 09:25:01 | 34.408 | 11/18/2010 03:25:01 | 31.617 |
| 3/25/2010 17:23:00 | 27.5 | 11/14/2010 09:45:01 | 36.401 | 11/18/2010 04:01:01 | 31.617 |
| 3/25/2010 17:58:00 | 27.5 | 11/14/2010 10:05:01 | 37.584 | 11/18/2010 04:37:01 | 31.617 |
| 3/25/2010 18:33:00 | 28.0 | 11/14/2010 10:25:01 | 37.584 | 11/18/2010 05:13:01 | 31.118 |
| 3/25/2010 19:08:00 | 28.0 | 11/14/2010 10:45:01 | 38.020 | 11/18/2010 05:49:01 | 31.118 |
| 3/25/2010 19:43:00 | 28.0 | 11/14/2010 11:05:01 | 38.269 | 11/18/2010 06:25:01 | 31.118 |
| 3/25/2010 20:18:00 | 28.0 | 11/14/2010 11:25:01 | 38.891 | 11/18/2010 07:01:01 | 30.619 |
| 3/25/2010 20:53:00 | 28.0 | 11/14/2010 11:45:01 | 39.202 | 11/18/2010 07:37:01 | 30.619 |

|                    |      |                     |        |                     |        |
|--------------------|------|---------------------|--------|---------------------|--------|
| 3/25/2010 21:28:00 | 28.0 | 11/14/2010 12:05:01 | 40.820 | 11/18/2010 08:13:01 | 30.619 |
| 3/25/2010 22:03:00 | 28.0 | 11/14/2010 12:25:01 | 40.260 | 11/18/2010 08:49:01 | 30.619 |
| 3/25/2010 22:38:00 | 27.5 | 11/14/2010 12:45:01 | 40.509 | 11/18/2010 09:25:01 | 30.120 |
| 3/25/2010 23:13:00 | 27.5 | 11/14/2010 13:05:01 | 41.317 | 11/18/2010 10:01:01 | 30.120 |
| 3/25/2010 23:48:00 | 27.5 | 11/14/2010 13:25:01 | 41.379 | 11/18/2010 10:37:01 | 30.120 |
| 3/26/2010 00:23:00 | 27.5 | 11/14/2010 13:45:01 | 39.389 | 11/18/2010 11:13:01 | 30.120 |
| 3/26/2010 00:58:00 | 27.5 | 11/14/2010 14:05:01 | 39.949 | 11/18/2010 11:49:01 | 30.120 |
| 3/26/2010 01:33:00 | 27.5 | 11/14/2010 14:25:01 | 41.068 | 11/18/2010 12:25:01 | 30.619 |
| 3/26/2010 02:08:00 | 27.5 | 11/14/2010 14:45:01 | 37.024 | 11/18/2010 13:01:01 | 30.619 |
| 3/26/2010 02:43:00 | 27.5 | 11/14/2010 15:05:01 | 38.580 | 11/18/2010 13:37:01 | 31.118 |
| 3/26/2010 03:18:00 | 27.5 | 11/14/2010 15:25:01 | 37.895 | 11/18/2010 14:13:01 | 31.118 |
| 3/26/2010 03:53:00 | 27.5 | 11/14/2010 15:45:01 | 36.463 | 11/18/2010 14:49:01 | 31.118 |
| 3/26/2010 04:28:00 | 27.5 | 11/14/2010 16:05:01 | 35.529 | 11/18/2010 15:25:01 | 31.118 |
| 3/26/2010 05:03:00 | 27.0 | 11/14/2010 16:25:01 | 35.654 | 11/18/2010 16:01:01 | 31.617 |
| 3/26/2010 05:38:00 | 27.0 | 11/14/2010 16:45:01 | 35.342 | 11/18/2010 16:37:01 | 31.617 |
| 3/26/2010 06:13:00 | 27.0 | 11/14/2010 17:05:01 | 34.595 | 11/18/2010 17:13:01 | 31.617 |
| 3/26/2010 06:48:00 | 27.0 | 11/14/2010 17:25:01 | 33.473 | 11/18/2010 17:49:01 | 32.116 |
| 3/26/2010 07:23:00 | 27.0 | 11/14/2010 17:45:01 | 32.351 | 11/18/2010 18:25:01 | 32.116 |
| 3/26/2010 07:58:00 | 27.0 | 11/14/2010 18:05:01 | 31.041 | 11/18/2010 19:01:01 | 32.116 |
| 3/26/2010 08:33:00 | 27.0 | 11/14/2010 18:25:01 | 30.230 | 11/18/2010 19:37:01 | 32.116 |
| 3/26/2010 09:08:00 | 27.0 | 11/14/2010 18:45:01 | 30.043 | 11/18/2010 20:13:01 | 32.116 |
| 3/26/2010 09:43:00 | 27.0 | 11/14/2010 19:05:01 | 29.980 | 11/18/2010 20:49:01 | 32.116 |
| 3/26/2010 10:18:00 | 27.0 | 11/14/2010 19:25:01 | 29.481 | 11/18/2010 21:25:01 | 32.615 |
| 3/26/2010 10:53:00 | 27.0 | 11/14/2010 19:45:01 | 29.419 | 11/18/2010 22:01:01 | 32.615 |
| 3/26/2010 11:28:00 | 27.0 | 11/14/2010 20:05:01 | 29.044 | 11/18/2010 22:37:01 | 33.113 |
| 3/26/2010 12:03:00 | 27.0 | 11/14/2010 20:25:01 | 28.607 | 11/18/2010 23:13:01 | 33.113 |
| 3/26/2010 12:38:00 | 27.0 | 11/14/2010 20:45:01 | 28.108 | 11/18/2010 23:49:01 | 33.113 |
| 3/26/2010 13:13:00 | 27.0 | 11/14/2010 21:05:01 | 27.983 | 11/19/2010 00:25:01 | 33.113 |
| 3/26/2010 13:48:00 | 27.0 | 11/14/2010 21:25:01 | 27.858 | 11/19/2010 01:01:01 | 33.113 |
| 3/26/2010 14:23:00 | 27.0 | 11/14/2010 21:45:01 | 27.546 | 11/19/2010 01:37:01 | 33.612 |
| 3/26/2010 14:58:00 | 27.0 | 11/14/2010 22:05:01 | 26.984 | 11/19/2010 02:13:01 | 34.110 |
| 3/26/2010 15:33:00 | 27.0 | 11/14/2010 22:25:01 | 26.172 | 11/19/2010 02:49:01 | 34.110 |
| 3/26/2010 16:08:00 | 27.0 | 11/14/2010 22:45:01 | 25.422 | 11/19/2010 03:25:01 | 35.107 |
| 3/26/2010 16:43:00 | 27.0 | 11/14/2010 23:05:01 | 25.047 | 11/19/2010 04:01:01 | 35.605 |
| 3/26/2010 17:18:00 | 27.5 | 11/14/2010 23:25:01 | 24.422 | 11/19/2010 04:37:01 | 35.107 |
| 3/26/2010 17:53:00 | 27.5 | 11/14/2010 23:45:01 | 24.672 | 11/19/2010 05:13:01 | 34.608 |
| 3/26/2010 18:28:00 | 27.5 | 11/15/2010 00:05:01 | 25.047 | 11/19/2010 05:49:01 | 34.110 |
| 3/26/2010 19:03:00 | 27.5 | 11/15/2010 00:25:01 | 24.859 | 11/19/2010 06:25:01 | 34.110 |
| 3/26/2010 19:38:00 | 27.5 | 11/15/2010 00:45:01 | 24.547 | 11/19/2010 07:01:01 | 34.110 |
| 3/26/2010 20:13:00 | 27.5 | 11/15/2010 01:05:01 | 24.172 | 11/19/2010 07:37:01 | 34.110 |
| 3/26/2010 20:48:00 | 27.5 | 11/15/2010 01:25:01 | 23.609 | 11/19/2010 08:13:01 | 34.110 |
| 3/26/2010 21:23:00 | 27.5 | 11/15/2010 01:45:01 | 23.172 | 11/19/2010 08:49:01 | 34.110 |
| 3/26/2010 21:58:00 | 27.5 | 11/15/2010 02:05:01 | 22.796 | 11/19/2010 09:25:01 | 33.612 |
| 3/26/2010 22:33:00 | 27.5 | 11/15/2010 02:25:01 | 22.234 | 11/19/2010 10:01:01 | 33.612 |
| 3/26/2010 23:08:00 | 27.5 | 11/15/2010 02:45:01 | 21.733 | 11/19/2010 10:37:01 | 33.612 |
| 3/26/2010 23:43:00 | 27.5 | 11/15/2010 03:05:01 | 21.170 | 11/19/2010 11:13:01 | 33.113 |
| 3/27/2010 00:18:00 | 27.5 | 11/15/2010 03:25:01 | 20.669 | 11/19/2010 11:49:01 | 33.113 |
| 3/27/2010 00:53:00 | 27.5 | 11/15/2010 03:45:01 | 20.357 | 11/19/2010 12:25:01 | 33.113 |
| 3/27/2010 01:28:00 | 27.5 | 11/15/2010 04:05:01 | 20.044 | 11/19/2010 13:01:01 | 33.612 |
| 3/27/2010 02:03:00 | 27.5 | 11/15/2010 04:25:01 | 19.918 | 11/19/2010 13:37:01 | 33.612 |

|                    |      |                     |        |                     |        |
|--------------------|------|---------------------|--------|---------------------|--------|
| 3/27/2010 02:38:00 | 27.5 | 11/15/2010 04:45:01 | 19.793 | 11/19/2010 14:13:01 | 33.612 |
| 3/27/2010 03:13:00 | 27.5 | 11/15/2010 05:05:01 | 19.418 | 11/19/2010 14:49:01 | 33.612 |
| 3/27/2010 03:48:00 | 27.5 | 11/15/2010 05:25:01 | 19.105 | 11/19/2010 15:25:01 | 33.612 |
| 3/27/2010 04:23:00 | 27.5 | 11/15/2010 05:45:01 | 19.105 | 11/19/2010 16:01:01 | 32.615 |
| 3/27/2010 04:58:00 | 27.5 | 11/15/2010 06:05:01 | 19.731 | 11/19/2010 16:37:01 | 32.615 |
| 3/27/2010 05:33:00 | 27.0 | 11/15/2010 06:25:01 | 21.107 | 11/19/2010 17:13:01 | 32.615 |
| 3/27/2010 06:08:00 | 27.0 | 11/15/2010 06:45:01 | 23.359 | 11/19/2010 17:49:01 | 33.113 |
| 3/27/2010 06:43:00 | 27.5 | 11/15/2010 07:05:01 | 26.297 | 11/19/2010 18:25:01 | 33.113 |
| 3/27/2010 07:18:00 | 27.5 | 11/15/2010 07:25:01 | 28.045 | 11/19/2010 19:01:01 | 33.612 |
| 3/27/2010 07:53:00 | 27.0 | 11/15/2010 07:45:01 | 29.294 | 11/19/2010 19:37:01 | 34.110 |
| 3/27/2010 08:28:00 | 27.0 | 11/15/2010 08:05:01 | 31.228 | 11/19/2010 20:13:01 | 34.608 |
| 3/27/2010 09:03:00 | 27.0 | 11/15/2010 08:25:01 | 32.475 | 11/19/2010 20:49:01 | 34.608 |
| 3/27/2010 09:38:00 | 27.0 | 11/15/2010 08:45:01 | 33.348 | 11/19/2010 21:25:01 | 34.608 |
| 3/27/2010 10:13:00 | 27.0 | 11/15/2010 09:05:01 | 34.345 | 11/19/2010 22:01:01 | 34.608 |
| 3/27/2010 10:48:00 | 27.0 | 11/15/2010 09:25:01 | 35.093 | 11/19/2010 22:37:01 | 34.110 |
| 3/27/2010 11:23:00 | 27.0 | 11/15/2010 09:45:01 | 35.529 | 11/19/2010 23:13:01 | 34.608 |
| 3/27/2010 11:58:00 | 27.0 | 11/15/2010 10:05:01 | 34.470 | 11/19/2010 23:49:01 | 34.110 |
| 3/27/2010 12:33:00 | 27.0 | 11/15/2010 10:25:01 | 34.781 | 11/20/2010 00:25:01 | 33.612 |
| 3/27/2010 13:08:00 | 27.0 | 11/15/2010 10:45:01 | 37.024 | 11/20/2010 01:01:01 | 33.113 |
| 3/27/2010 13:43:00 | 27.0 | 11/15/2010 11:05:01 | 36.775 | 11/20/2010 01:37:01 | 33.612 |
| 3/27/2010 14:18:00 | 27.0 | 11/15/2010 11:25:01 | 37.771 | 11/20/2010 02:13:01 | 34.110 |
| 3/27/2010 14:53:00 | 27.0 | 11/15/2010 11:45:01 | 38.704 | 11/20/2010 02:49:01 | 34.608 |
| 3/27/2010 15:28:00 | 27.0 | 11/15/2010 12:05:01 | 40.011 | 11/20/2010 03:25:01 | 34.608 |
| 3/27/2010 16:03:00 | 27.0 | 11/15/2010 12:25:01 | 40.136 | 11/20/2010 04:01:01 | 34.608 |
| 3/27/2010 16:38:00 | 27.0 | 11/15/2010 12:45:01 | 39.576 | 11/20/2010 04:37:01 | 34.608 |
| 3/27/2010 17:13:00 | 27.5 | 11/15/2010 13:05:01 | 39.513 | 11/20/2010 05:13:01 | 34.608 |
| 3/27/2010 17:48:00 | 27.5 | 11/15/2010 13:25:01 | 40.882 | 11/20/2010 05:49:01 | 34.110 |
| 3/27/2010 18:23:00 | 27.5 | 11/15/2010 13:45:01 | 40.260 | 11/20/2010 06:25:01 | 34.110 |
| 3/27/2010 18:58:00 | 27.5 | 11/15/2010 14:05:01 | 39.887 | 11/20/2010 07:01:01 | 34.608 |
| 3/27/2010 19:33:00 | 27.5 | 11/15/2010 14:25:01 | 39.389 | 11/20/2010 07:37:01 | 35.107 |
| 3/27/2010 20:08:00 | 27.5 | 11/15/2010 14:45:01 | 38.767 | 11/20/2010 08:13:01 | 34.110 |
| 3/27/2010 20:43:00 | 27.5 | 11/15/2010 15:05:01 | 36.837 | 11/20/2010 08:49:01 | 33.113 |
| 3/27/2010 21:18:00 | 27.5 | 11/15/2010 15:25:01 | 37.024 | 11/20/2010 09:25:01 | 32.615 |
| 3/27/2010 21:53:00 | 27.5 | 11/15/2010 15:45:01 | 37.086 | 11/20/2010 10:01:01 | 32.615 |
| 3/27/2010 22:28:00 | 27.5 | 11/15/2010 16:05:01 | 36.027 | 11/20/2010 10:37:01 | 32.615 |
| 3/27/2010 23:03:00 | 27.5 | 11/15/2010 16:25:01 | 35.093 | 11/20/2010 11:13:01 | 32.116 |
| 3/27/2010 23:38:00 | 27.5 | 11/15/2010 16:45:01 | 34.844 | 11/20/2010 11:49:01 | 32.615 |
| 3/28/2010 00:13:00 | 27.5 | 11/15/2010 17:05:01 | 33.660 | 11/20/2010 12:25:01 | 32.116 |
| 3/28/2010 00:48:00 | 27.5 | 11/15/2010 17:25:01 | 32.039 | 11/20/2010 13:01:01 | 33.113 |
| 3/28/2010 01:23:00 | 27.5 | 11/15/2010 17:45:01 | 30.417 | 11/20/2010 13:37:01 | 33.612 |
| 3/28/2010 01:58:00 | 27.5 | 11/15/2010 18:05:01 | 28.732 | 11/20/2010 14:13:01 | 34.110 |
| 3/28/2010 02:33:00 | 27.5 | 11/15/2010 18:25:01 | 27.296 | 11/20/2010 14:49:01 | 34.110 |
| 3/28/2010 03:08:00 | 27.5 | 11/15/2010 18:45:01 | 26.047 | 11/20/2010 15:25:01 | 34.110 |
| 3/28/2010 03:43:00 | 27.5 | 11/15/2010 19:05:01 | 25.047 | 11/20/2010 16:01:01 | 33.612 |
| 3/28/2010 04:18:00 | 27.5 | 11/15/2010 19:25:01 | 24.109 | 11/20/2010 16:37:01 | 33.612 |
| 3/28/2010 04:53:00 | 27.5 | 11/15/2010 19:45:01 | 23.422 | 11/20/2010 17:13:01 | 33.612 |
| 3/28/2010 05:28:00 | 27.0 | 11/15/2010 20:05:01 | 23.109 | 11/20/2010 17:49:01 | 32.615 |
| 3/28/2010 06:03:00 | 27.0 | 11/15/2010 20:25:01 | 23.172 | 11/20/2010 18:25:01 | 33.113 |
| 3/28/2010 06:38:00 | 27.0 | 11/15/2010 20:45:01 | 25.984 | 11/20/2010 19:01:01 | 34.110 |
| 3/28/2010 07:13:00 | 27.0 | 11/15/2010 21:05:01 | 25.922 | 11/20/2010 19:37:01 | 34.608 |

|                    |      |                     |        |                     |        |
|--------------------|------|---------------------|--------|---------------------|--------|
| 3/28/2010 07:48:00 | 27.0 | 11/15/2010 21:25:01 | 25.297 | 11/20/2010 20:13:01 | 35.107 |
| 3/28/2010 08:23:00 | 27.0 | 11/15/2010 21:45:01 | 24.609 | 11/20/2010 20:49:01 | 35.107 |
| 3/28/2010 08:58:00 | 27.0 | 11/15/2010 22:05:01 | 23.984 | 11/20/2010 21:25:01 | 35.107 |
| 3/28/2010 09:33:00 | 27.0 | 11/15/2010 22:25:01 | 23.359 | 11/20/2010 22:01:01 | 34.608 |
| 3/28/2010 10:08:00 | 27.0 | 11/15/2010 22:45:01 | 23.047 | 11/20/2010 22:37:01 | 34.608 |
| 3/28/2010 10:43:00 | 27.0 | 11/15/2010 23:05:01 | 22.859 | 11/20/2010 23:13:01 | 34.110 |
| 3/28/2010 11:18:00 | 27.0 | 11/15/2010 23:25:01 | 22.859 | 11/20/2010 23:49:01 | 34.110 |
| 3/28/2010 11:53:00 | 27.0 | 11/15/2010 23:45:01 | 23.109 | 11/21/2010 00:25:01 | 34.110 |
| 3/28/2010 12:28:00 | 27.0 | 11/16/2010 00:05:01 | 23.109 | 11/21/2010 01:01:01 | 34.608 |
| 3/28/2010 13:03:00 | 27.0 | 11/16/2010 00:25:01 | 22.796 | 11/21/2010 01:37:01 | 34.608 |
| 3/28/2010 13:38:00 | 27.0 | 11/16/2010 00:45:01 | 22.671 | 11/21/2010 02:13:01 | 34.110 |
| 3/28/2010 14:13:00 | 27.0 | 11/16/2010 01:05:01 | 22.546 | 11/21/2010 02:49:01 | 34.608 |
| 3/28/2010 14:48:00 | 27.0 | 11/16/2010 01:25:01 | 22.296 | 11/21/2010 03:25:01 | 34.608 |
| 3/28/2010 15:23:00 | 27.0 | 11/16/2010 01:45:01 | 21.921 | 11/21/2010 04:01:01 | 34.608 |
| 3/28/2010 15:58:00 | 27.0 | 11/16/2010 02:05:01 | 21.608 | 11/21/2010 04:37:01 | 34.110 |
| 3/28/2010 16:33:00 | 27.0 | 11/16/2010 02:25:01 | 21.483 | 11/21/2010 05:13:01 | 34.110 |
| 3/28/2010 17:08:00 | 27.5 | 11/16/2010 02:45:01 | 21.170 | 11/21/2010 05:49:01 | 34.110 |
| 3/28/2010 17:43:00 | 28.0 | 11/16/2010 03:05:01 | 20.732 | 11/21/2010 06:25:01 | 34.110 |
| 3/28/2010 18:18:00 | 27.5 | 11/16/2010 03:25:01 | 20.544 | 11/21/2010 07:01:01 | 33.612 |
| 3/28/2010 18:53:00 | 27.5 | 11/16/2010 03:45:01 | 20.607 | 11/21/2010 07:37:01 | 33.612 |
| 3/28/2010 19:28:00 | 27.5 | 11/16/2010 04:05:01 | 20.169 | 11/21/2010 08:13:01 | 33.612 |
| 3/28/2010 20:03:00 | 27.5 | 11/16/2010 04:25:01 | 19.918 | 11/21/2010 08:49:01 | 33.612 |
| 3/28/2010 20:38:00 | 27.5 | 11/16/2010 04:45:01 | 19.543 | 11/21/2010 09:25:01 | 34.110 |
| 3/28/2010 21:13:00 | 27.5 | 11/16/2010 05:05:01 | 19.042 | 11/21/2010 10:01:01 | 34.110 |
| 3/28/2010 21:48:00 | 27.5 | 11/16/2010 05:25:01 | 18.729 | 11/21/2010 10:37:01 | 34.110 |
| 3/28/2010 22:23:00 | 27.5 | 11/16/2010 05:45:01 | 18.854 | 11/21/2010 11:13:01 | 33.612 |
| 3/28/2010 22:58:00 | 27.5 | 11/16/2010 06:05:01 | 19.418 | 11/21/2010 11:49:01 | 33.612 |
| 3/28/2010 23:33:00 | 27.5 | 11/16/2010 06:25:01 | 20.982 | 11/21/2010 12:25:01 | 33.113 |
| 3/29/2010 00:08:00 | 27.5 | 11/16/2010 06:45:01 | 23.672 | 11/21/2010 13:01:01 | 33.113 |
| 3/29/2010 00:43:00 | 27.0 | 11/16/2010 07:05:01 | 26.546 | 11/21/2010 13:37:01 | 33.113 |
| 3/29/2010 01:18:00 | 27.5 | 11/16/2010 07:25:01 | 28.482 | 11/21/2010 14:13:01 | 33.612 |
| 3/29/2010 01:53:00 | 27.5 | 11/16/2010 07:45:01 | 29.543 | 11/21/2010 14:49:01 | 33.612 |
| 3/29/2010 02:28:00 | 27.5 | 11/16/2010 08:05:01 | 31.041 | 11/21/2010 15:25:01 | 33.113 |
| 3/29/2010 03:03:00 | 27.0 | 11/16/2010 08:25:01 | 31.789 | 11/21/2010 16:01:01 | 33.612 |
| 3/29/2010 03:38:00 | 27.0 | 11/16/2010 08:45:01 | 32.538 | 11/21/2010 16:37:01 | 34.110 |
| 3/29/2010 04:13:00 | 27.0 | 11/16/2010 09:05:01 | 33.597 | 11/21/2010 17:13:01 | 35.107 |
| 3/29/2010 04:48:00 | 27.5 | 11/16/2010 09:25:01 | 35.218 | 11/21/2010 17:49:01 | 35.107 |
| 3/29/2010 05:23:00 | 27.0 | 11/16/2010 09:45:01 | 36.339 | 11/21/2010 18:25:01 | 35.107 |
| 3/29/2010 05:58:00 | 27.0 | 11/16/2010 10:05:01 | 37.086 | 11/21/2010 19:01:01 | 34.110 |
| 3/29/2010 06:33:00 | 27.0 | 11/16/2010 10:25:01 | 37.646 | 11/21/2010 19:37:01 | 34.110 |
| 3/29/2010 07:08:00 | 27.0 | 11/16/2010 10:45:01 | 37.771 | 11/21/2010 20:13:01 | 34.110 |
| 3/29/2010 07:43:00 | 27.0 | 11/16/2010 11:05:01 | 38.144 | 11/21/2010 20:49:01 | 34.110 |
| 3/29/2010 08:18:00 | 27.0 | 11/16/2010 11:25:01 | 37.895 | 11/21/2010 21:25:01 | 34.110 |
| 3/29/2010 08:53:00 | 27.0 | 11/16/2010 11:45:01 | 38.767 | 11/21/2010 22:01:01 | 34.110 |
| 3/29/2010 09:28:00 | 27.0 | 11/16/2010 12:05:01 | 39.762 | 11/21/2010 22:37:01 | 33.612 |
| 3/29/2010 10:03:00 | 27.0 | 11/16/2010 12:25:01 | 40.011 | 11/21/2010 23:13:01 | 33.612 |
| 3/29/2010 10:38:00 | 27.0 | 11/16/2010 12:45:01 | 40.011 | 11/21/2010 23:49:01 | 33.612 |
| 3/29/2010 11:13:00 | 27.0 | 11/16/2010 13:05:01 | 40.198 | 11/22/2010 00:25:01 | 34.110 |
| 3/29/2010 11:48:00 | 27.0 | 11/16/2010 13:25:01 | 40.384 | 11/22/2010 01:01:01 | 33.612 |
| 3/29/2010 12:23:00 | 27.0 | 11/16/2010 13:45:01 | 40.384 | 11/22/2010 01:37:01 | 34.608 |



|                    |      |                     |        |                     |        |
|--------------------|------|---------------------|--------|---------------------|--------|
| 3/29/2010 12:58:00 | 27.5 | 11/16/2010 14:05:01 | 39.700 | 11/22/2010 02:13:01 | 34.608 |
| 3/29/2010 13:33:00 | 27.5 | 11/16/2010 14:25:01 | 39.451 | 11/22/2010 02:49:01 | 34.608 |
| 3/29/2010 14:08:00 | 27.5 | 11/16/2010 14:45:01 | 39.078 | 11/22/2010 03:25:01 | 34.608 |
| 3/29/2010 14:43:00 | 27.5 | 11/16/2010 15:05:01 | 38.082 | 11/22/2010 04:01:01 | 34.608 |
| 3/29/2010 15:18:00 | 27.5 | 11/16/2010 15:25:01 | 37.273 | 11/22/2010 04:37:01 | 34.110 |
| 3/29/2010 15:53:00 | 27.5 | 11/16/2010 15:45:01 | 36.962 | 11/22/2010 05:13:01 | 33.612 |
| 3/29/2010 16:28:00 | 27.5 | 11/16/2010 16:05:01 | 36.712 | 11/22/2010 05:49:01 | 33.612 |
| 3/29/2010 17:03:00 | 27.5 | 11/16/2010 16:25:01 | 36.027 | 11/22/2010 06:25:01 | 33.113 |
| 3/29/2010 17:38:00 | 27.5 | 11/16/2010 16:45:01 | 35.280 | 11/22/2010 07:01:01 | 33.113 |
| 3/29/2010 18:13:00 | 27.5 | 11/16/2010 17:05:01 | 34.034 | 11/22/2010 07:37:01 | 33.113 |
| 3/29/2010 18:48:00 | 27.5 | 11/16/2010 17:25:01 | 33.161 | 11/22/2010 08:13:01 | 32.615 |
| 3/29/2010 19:23:00 | 27.5 | 11/16/2010 17:45:01 | 31.914 | 11/22/2010 08:49:01 | 32.615 |
| 3/29/2010 19:58:00 | 27.5 | 11/16/2010 18:05:01 | 30.230 | 11/22/2010 09:25:01 | 32.615 |
| 3/29/2010 20:33:00 | 27.5 | 11/16/2010 18:25:01 | 28.607 | 11/22/2010 10:01:01 | 33.113 |
| 3/29/2010 21:08:00 | 27.5 | 11/16/2010 18:45:01 | 27.233 | 11/22/2010 10:37:01 | 33.612 |
| 3/29/2010 21:43:00 | 27.5 | 11/16/2010 19:05:01 | 26.359 | 11/22/2010 11:13:01 | 33.612 |
| 3/29/2010 22:18:00 | 27.5 | 11/16/2010 19:25:01 | 25.672 | 11/22/2010 11:49:01 | 33.612 |
| 3/29/2010 22:53:00 | 27.5 | 11/16/2010 19:45:01 | 25.359 | 11/22/2010 12:25:01 | 33.612 |
| 3/29/2010 23:28:00 | 27.5 | 11/16/2010 20:05:01 | 25.109 | 11/22/2010 13:01:01 | 33.612 |
| 3/30/2010 00:03:00 | 27.5 | 11/16/2010 20:25:01 | 25.172 | 11/22/2010 13:37:01 | 33.113 |
| 3/30/2010 00:38:00 | 27.5 | 11/16/2010 20:45:01 | 25.297 | 11/22/2010 14:13:01 | 34.608 |
| 3/30/2010 01:13:00 | 27.5 | 11/16/2010 21:05:01 | 25.172 | 11/22/2010 14:49:01 | 35.605 |
| 3/30/2010 01:48:00 | 27.5 | 11/16/2010 21:25:01 | 25.109 | 11/22/2010 15:25:01 | 35.107 |
| 3/30/2010 02:23:00 | 27.5 | 11/16/2010 21:45:01 | 24.859 | 11/22/2010 16:01:01 | 34.608 |
| 3/30/2010 02:58:00 | 27.5 | 11/16/2010 22:05:01 | 24.547 | 11/22/2010 16:37:01 | 33.612 |
| 3/30/2010 03:33:00 | 27.0 | 11/16/2010 22:25:01 | 24.297 | 11/22/2010 17:13:01 | 34.110 |
| 3/30/2010 04:08:00 | 27.0 | 11/16/2010 22:45:01 | 23.859 | 11/22/2010 17:49:01 | 34.110 |
| 3/30/2010 04:43:00 | 27.0 | 11/16/2010 23:05:01 | 23.297 | 11/22/2010 18:25:01 | 34.110 |
| 3/30/2010 05:18:00 | 27.0 | 11/16/2010 23:25:01 | 22.921 | 11/22/2010 19:01:01 | 34.608 |
| 3/30/2010 05:53:00 | 27.0 | 11/16/2010 23:45:01 | 22.546 | 11/22/2010 19:37:01 | 34.608 |
| 3/30/2010 06:28:00 | 27.0 | 11/17/2010 00:05:01 | 22.234 | 11/22/2010 20:13:01 | 34.608 |
| 3/30/2010 07:03:00 | 27.0 | 11/17/2010 00:25:01 | 22.108 | 11/22/2010 20:49:01 | 35.107 |
| 3/30/2010 07:38:00 | 27.0 | 11/17/2010 00:45:01 | 21.983 | 11/22/2010 21:25:01 | 34.608 |
| 3/30/2010 08:13:00 | 27.0 | 11/17/2010 01:05:01 | 21.671 | 11/22/2010 22:01:01 | 34.608 |
| 3/30/2010 08:48:00 | 27.0 | 11/17/2010 01:25:01 | 21.420 | 11/22/2010 22:37:01 | 34.608 |
| 3/30/2010 09:23:00 | 27.0 | 11/17/2010 01:45:01 | 21.358 | 11/22/2010 23:13:01 | 34.608 |
| 3/30/2010 09:58:00 | 27.0 | 11/17/2010 02:05:01 | 21.358 | 11/22/2010 23:49:01 | 34.110 |
| 3/30/2010 10:33:00 | 27.0 | 11/17/2010 02:25:01 | 21.358 | 11/23/2010 00:25:01 | 34.608 |
| 3/30/2010 11:08:00 | 27.0 | 11/17/2010 02:45:01 | 21.295 | 11/23/2010 01:01:01 | 34.110 |
| 3/30/2010 11:43:00 | 27.0 | 11/17/2010 03:05:01 | 20.920 | 11/23/2010 01:37:01 | 34.110 |
| 3/30/2010 12:18:00 | 27.0 | 11/17/2010 03:25:01 | 20.544 | 11/23/2010 02:13:01 | 34.110 |
| 3/30/2010 12:53:00 | 27.0 | 11/17/2010 03:45:01 | 20.544 | 11/23/2010 02:49:01 | 34.110 |
| 3/30/2010 13:28:00 | 27.0 | 11/17/2010 04:05:01 | 20.482 | 11/23/2010 03:25:01 | 34.110 |
| 3/30/2010 14:03:00 | 27.0 | 11/17/2010 04:25:01 | 20.419 | 11/23/2010 04:01:01 | 33.113 |
| 3/30/2010 14:38:00 | 27.0 | 11/17/2010 04:45:01 | 20.044 | 11/23/2010 04:37:01 | 33.113 |
| 3/30/2010 15:13:00 | 27.0 | 11/17/2010 05:05:01 | 19.668 | 11/23/2010 05:13:01 | 33.113 |
| 3/30/2010 15:48:00 | 27.0 | 11/17/2010 05:25:01 | 19.543 | 11/23/2010 05:49:01 | 33.113 |
| 3/30/2010 16:23:00 | 27.5 | 11/17/2010 05:45:01 | 19.480 | 11/23/2010 06:25:01 | 33.113 |
| 3/30/2010 16:58:00 | 27.5 | 11/17/2010 06:05:01 | 20.419 | 11/23/2010 07:01:01 | 33.113 |
| 3/30/2010 17:33:00 | 27.5 | 11/17/2010 06:25:01 | 22.359 | 11/23/2010 07:37:01 | 33.113 |

|                    |      |                     |        |                     |        |
|--------------------|------|---------------------|--------|---------------------|--------|
| 3/30/2010 18:08:00 | 27.5 | 11/17/2010 06:45:01 | 25.109 | 11/23/2010 08:13:01 | 32.615 |
| 3/30/2010 18:43:00 | 27.5 | 11/17/2010 07:05:01 | 26.859 | 11/23/2010 08:49:01 | 33.113 |
| 3/30/2010 19:18:00 | 27.5 | 11/17/2010 07:25:01 | 27.983 | 11/23/2010 09:25:01 | 33.113 |
| 3/30/2010 19:53:00 | 27.5 | 11/17/2010 07:45:01 | 28.732 | 11/23/2010 10:01:01 | 33.612 |
| 3/30/2010 20:28:00 | 27.5 | 11/17/2010 08:05:01 | 29.855 | 11/23/2010 10:37:01 | 34.110 |
| 3/30/2010 21:03:00 | 27.5 | 11/17/2010 08:25:01 | 31.914 | 11/23/2010 11:13:01 | 34.110 |
| 3/30/2010 21:38:00 | 27.5 | 11/17/2010 08:45:01 | 32.538 | 11/23/2010 11:49:01 | 34.110 |
| 3/30/2010 22:13:00 | 27.5 | 11/17/2010 09:05:01 | 32.912 | 11/23/2010 12:25:01 | 34.110 |
| 3/30/2010 22:48:00 | 27.5 | 11/17/2010 09:25:01 | 34.781 | 11/23/2010 13:01:01 | 34.110 |
| 3/30/2010 23:23:00 | 27.5 | 11/17/2010 09:45:01 | 36.276 | 11/23/2010 13:37:01 | 34.110 |
| 3/30/2010 23:58:00 | 27.5 | 11/17/2010 10:05:01 | 37.211 | 11/23/2010 14:13:01 | 34.608 |
| 3/31/2010 00:33:00 | 27.5 | 11/17/2010 10:25:01 | 37.397 | 11/23/2010 14:49:01 | 34.608 |
| 3/31/2010 01:08:00 | 27.0 | 11/17/2010 10:45:01 | 37.895 | 11/23/2010 15:25:01 | 34.110 |
| 3/31/2010 01:43:00 | 27.0 | 11/17/2010 11:05:01 | 38.642 | 11/23/2010 16:01:01 | 34.110 |
| 3/31/2010 02:18:00 | 27.0 | 11/17/2010 11:25:01 | 37.522 | 11/23/2010 16:37:01 | 33.612 |
| 3/31/2010 02:53:00 | 27.5 | 11/17/2010 11:45:01 | 37.709 | 11/23/2010 17:13:01 | 34.608 |
| 3/31/2010 03:28:00 | 27.5 | 11/17/2010 12:05:01 | 39.451 | 11/23/2010 17:49:01 | 34.608 |
| 3/31/2010 04:03:00 | 27.5 | 11/17/2010 12:25:01 | 37.086 | 11/23/2010 18:25:01 | 34.608 |
| 3/31/2010 04:38:00 | 27.5 | 11/17/2010 12:45:01 | 36.526 | 11/23/2010 19:01:01 | 34.608 |
| 3/31/2010 05:13:00 | 27.0 | 11/17/2010 13:05:01 | 35.778 | 11/23/2010 19:37:01 | 34.110 |
| 3/31/2010 05:48:00 | 27.0 | 11/17/2010 13:25:01 | 38.829 | 11/23/2010 20:13:01 | 34.110 |
| 3/31/2010 06:23:00 | 27.0 | 11/17/2010 13:45:01 | 38.767 | 11/23/2010 20:49:01 | 34.608 |
| 3/31/2010 06:58:00 | 27.0 | 11/17/2010 14:05:01 | 36.090 | 11/23/2010 21:25:01 | 34.608 |
| 3/31/2010 07:33:00 | 27.0 | 11/17/2010 14:25:01 | 36.526 | 11/23/2010 22:01:01 | 34.110 |
| 3/31/2010 08:08:00 | 27.0 | 11/17/2010 14:45:01 | 35.280 | 11/23/2010 22:37:01 | 34.110 |
| 3/31/2010 08:43:00 | 27.0 | 11/17/2010 15:05:01 | 34.595 | 11/23/2010 23:13:01 | 34.110 |
| 3/31/2010 09:18:00 | 27.0 | 11/17/2010 15:25:01 | 35.218 | 11/23/2010 23:49:01 | 34.608 |
| 3/31/2010 09:53:00 | 27.0 | 11/17/2010 15:45:01 | 34.781 | 11/24/2010 00:25:01 | 34.110 |
| 3/31/2010 10:28:00 | 27.0 | 11/17/2010 16:05:01 | 35.155 | 11/24/2010 01:01:01 | 34.110 |
| 3/31/2010 11:03:00 | 27.0 | 11/17/2010 16:25:01 | 34.034 | 11/24/2010 01:37:01 | 34.110 |
| 3/31/2010 11:38:00 | 27.0 | 11/17/2010 16:45:01 | 33.410 | 11/24/2010 02:13:01 | 34.110 |
| 3/31/2010 12:13:00 | 27.0 | 11/17/2010 17:05:01 | 33.099 | 11/24/2010 02:49:01 | 34.110 |
| 3/31/2010 12:48:00 | 27.0 | 11/17/2010 17:25:01 | 32.475 | 11/24/2010 03:25:01 | 33.612 |
| 3/31/2010 13:23:00 | 27.0 | 11/17/2010 17:45:01 | 31.477 | 11/24/2010 04:01:01 | 33.113 |
| 3/31/2010 13:58:00 | 27.0 | 11/17/2010 18:05:01 | 30.417 | 11/24/2010 04:37:01 | 32.615 |
| 3/31/2010 14:33:00 | 27.0 | 11/17/2010 18:25:01 | 29.169 | 11/24/2010 05:13:01 | 32.615 |
| 3/31/2010 15:08:00 | 27.0 | 11/17/2010 18:45:01 | 28.482 | 11/24/2010 05:49:01 | 32.116 |
| 3/31/2010 15:43:00 | 27.0 | 11/17/2010 19:05:01 | 27.546 | 11/24/2010 06:25:01 | 32.116 |
| 3/31/2010 16:18:00 | 27.0 | 11/17/2010 19:25:01 | 27.421 | 11/24/2010 07:01:01 | 32.116 |
| 3/31/2010 16:53:00 | 27.0 | 11/17/2010 19:45:01 | 27.109 | 11/24/2010 07:37:01 | 32.615 |
| 3/31/2010 17:28:00 | 27.0 | 11/17/2010 20:05:01 | 26.546 | 11/24/2010 08:13:01 | 32.615 |
| 3/31/2010 18:03:00 | 27.0 | 11/17/2010 20:25:01 | 25.734 | 11/24/2010 08:49:01 | 32.615 |
| 3/31/2010 18:38:00 | 27.0 | 11/17/2010 20:45:01 | 24.984 | 11/24/2010 09:25:01 | 32.615 |
| 3/31/2010 19:13:00 | 27.0 | 11/17/2010 21:05:01 | 24.359 | 11/24/2010 10:01:01 | 33.113 |
| 3/31/2010 19:48:00 | 27.0 | 11/17/2010 21:25:01 | 23.797 | 11/24/2010 10:37:01 | 33.612 |
| 3/31/2010 20:23:00 | 27.0 | 11/17/2010 21:45:01 | 23.422 | 11/24/2010 11:13:01 | 34.608 |
| 3/31/2010 20:58:00 | 27.0 | 11/17/2010 22:05:01 | 23.172 | 11/24/2010 11:49:01 | 35.107 |
| 3/31/2010 21:33:00 | 27.0 | 11/17/2010 22:25:01 | 22.859 | 11/24/2010 12:25:01 | 35.107 |
| 3/31/2010 22:08:00 | 27.0 | 11/17/2010 22:45:01 | 22.734 | 11/24/2010 13:01:01 | 34.608 |
| 3/31/2010 22:43:00 | 27.0 | 11/17/2010 23:05:01 | 22.546 | 11/24/2010 13:37:01 | 34.608 |

|                    |      |                     |        |                     |        |
|--------------------|------|---------------------|--------|---------------------|--------|
| 3/31/2010 23:18:00 | 27.0 | 11/17/2010 23:25:01 | 22.234 | 11/24/2010 14:13:01 | 34.608 |
| 3/31/2010 23:53:00 | 27.0 | 11/17/2010 23:45:01 | 22.108 | 11/24/2010 14:49:01 | 34.608 |
| 4/1/2010 00:28:00  | 27.0 | 11/18/2010 00:05:01 | 22.484 | 11/24/2010 15:25:01 | 35.605 |
| 4/1/2010 01:03:00  | 27.0 | 11/18/2010 00:25:01 | 22.921 | 11/24/2010 16:01:01 | 35.605 |
| 4/1/2010 01:38:00  | 27.0 | 11/18/2010 00:45:01 | 22.984 | 11/24/2010 16:37:01 | 34.608 |
| 4/1/2010 02:13:00  | 27.0 | 11/18/2010 01:05:01 | 22.484 | 11/24/2010 17:13:01 | 34.110 |
| 4/1/2010 02:48:00  | 27.0 | 11/18/2010 01:25:01 | 21.921 | 11/24/2010 17:49:01 | 33.612 |
| 4/1/2010 03:23:00  | 27.0 | 11/18/2010 01:45:01 | 21.483 | 11/24/2010 18:25:01 | 33.612 |
| 4/1/2010 03:58:00  | 27.0 | 11/18/2010 02:05:01 | 21.170 | 11/24/2010 19:01:01 | 33.612 |
| 4/1/2010 04:33:00  | 27.0 | 11/18/2010 02:25:01 | 20.857 | 11/24/2010 19:37:01 | 34.110 |
| 4/1/2010 05:08:00  | 27.0 | 11/18/2010 02:45:01 | 20.544 | 11/24/2010 20:13:01 | 34.110 |
| 4/1/2010 05:43:00  | 27.0 | 11/18/2010 03:05:01 | 20.482 | 11/24/2010 20:49:01 | 34.110 |
| 4/1/2010 06:18:00  | 27.0 | 11/18/2010 03:25:01 | 20.419 | 11/24/2010 21:25:01 | 34.110 |
| 4/1/2010 06:53:00  | 26.5 | 11/18/2010 03:45:01 | 20.231 | 11/24/2010 22:01:01 | 34.110 |
| 4/1/2010 07:28:00  | 26.5 | 11/18/2010 04:05:01 | 20.044 | 11/24/2010 22:37:01 | 34.110 |
| 4/1/2010 08:03:00  | 26.5 | 11/18/2010 04:25:01 | 19.918 | 11/24/2010 23:13:01 | 34.110 |
| 4/1/2010 08:38:00  | 26.5 | 11/18/2010 04:45:01 | 19.856 | 11/24/2010 23:49:01 | 34.110 |
| 4/1/2010 09:13:00  | 26.5 | 11/18/2010 05:05:01 | 19.731 | 11/25/2010 00:25:01 | 34.110 |
| 4/1/2010 09:48:00  | 26.5 | 11/18/2010 05:25:01 | 19.606 | 11/25/2010 01:01:01 | 34.110 |
| 4/1/2010 10:23:00  | 26.5 | 11/18/2010 05:45:01 | 19.918 | 11/25/2010 01:37:01 | 34.110 |
| 4/1/2010 10:58:00  | 26.5 | 11/18/2010 06:05:01 | 20.669 | 11/25/2010 02:13:01 | 34.110 |
| 4/1/2010 11:33:00  | 26.5 | 11/18/2010 06:25:01 | 22.234 | 11/25/2010 02:49:01 | 33.612 |
| 4/1/2010 12:08:00  | 26.5 | 11/18/2010 06:45:01 | 24.359 | 11/25/2010 03:25:01 | 33.612 |
| 4/1/2010 12:43:00  | 26.5 | 11/18/2010 07:05:01 | 26.484 | 11/25/2010 04:01:01 | 33.612 |
| 4/1/2010 13:18:00  | 26.5 | 11/18/2010 07:25:01 | 28.482 | 11/25/2010 04:37:01 | 33.113 |
| 4/1/2010 13:53:00  | 26.5 | 11/18/2010 07:45:01 | 29.668 | 11/25/2010 05:13:01 | 32.615 |
| 4/1/2010 14:28:00  | 26.5 | 11/18/2010 08:05:01 | 31.353 | 11/25/2010 05:49:01 | 32.615 |
| 4/1/2010 15:03:00  | 26.5 | 11/18/2010 08:25:01 | 32.849 | 11/25/2010 06:25:01 | 32.116 |
| 4/1/2010 15:38:00  | 26.5 | 11/18/2010 08:45:01 | 33.223 | 11/25/2010 07:01:01 | 32.116 |
| 4/1/2010 16:13:00  | 26.5 | 11/18/2010 09:05:01 | 34.470 | 11/25/2010 07:37:01 | 32.615 |
| 4/1/2010 16:48:00  | 27.0 | 11/18/2010 09:25:01 | 36.463 | 11/25/2010 08:13:01 | 33.113 |
| 4/1/2010 17:23:00  | 27.0 | 11/18/2010 09:45:01 | 39.140 | 11/25/2010 08:49:01 | 33.113 |
| 4/1/2010 17:58:00  | 27.0 | 11/18/2010 10:05:01 | 37.273 | 11/25/2010 09:25:01 | 33.113 |
| 4/1/2010 18:33:00  | 27.0 | 11/18/2010 10:25:01 | 36.276 | 11/25/2010 10:01:01 | 33.113 |
| 4/1/2010 19:08:00  | 27.0 | 11/18/2010 10:45:01 | 35.529 | 11/25/2010 10:37:01 | 33.113 |
| 4/1/2010 19:43:00  | 27.0 | 11/18/2010 11:05:01 | 37.397 | 11/25/2010 11:13:01 | 33.113 |
| 4/1/2010 20:18:00  | 27.0 | 11/18/2010 11:25:01 | 39.576 | 11/25/2010 11:49:01 | 33.612 |
| 4/1/2010 20:53:00  | 27.0 | 11/18/2010 11:45:01 | 35.529 | 11/25/2010 12:25:01 | 34.110 |
| 4/1/2010 21:28:00  | 27.0 | 11/18/2010 12:05:01 | 37.273 | 11/25/2010 13:01:01 | 34.110 |
| 4/1/2010 22:03:00  | 27.0 | 11/18/2010 12:25:01 | 37.771 | 11/25/2010 13:37:01 | 34.608 |
| 4/1/2010 22:38:00  | 27.0 | 11/18/2010 12:45:01 | 36.775 | 11/25/2010 14:13:01 | 34.110 |
| 4/1/2010 23:13:00  | 27.0 | 11/18/2010 13:05:01 | 37.024 | 11/25/2010 14:49:01 | 34.110 |
| 4/1/2010 23:48:00  | 27.0 | 11/18/2010 13:25:01 | 41.131 | 11/25/2010 15:25:01 | 33.612 |
| 4/2/2010 00:23:00  | 27.0 | 11/18/2010 13:45:01 | 39.638 | 11/25/2010 16:01:01 | 33.612 |
| 4/2/2010 00:58:00  | 27.0 | 11/18/2010 14:05:01 | 39.389 | 11/25/2010 16:37:01 | 33.612 |
| 4/2/2010 01:33:00  | 27.0 | 11/18/2010 14:25:01 | 40.758 | 11/25/2010 17:13:01 | 33.113 |
| 4/2/2010 02:08:00  | 27.0 | 11/18/2010 14:45:01 | 39.576 | 11/25/2010 17:49:01 | 33.113 |
| 4/2/2010 02:43:00  | 27.0 | 11/18/2010 15:05:01 | 38.269 | 11/25/2010 18:25:01 | 33.612 |
| 4/2/2010 03:18:00  | 27.0 | 11/18/2010 15:25:01 | 38.082 | 11/25/2010 19:01:01 | 33.612 |
| 4/2/2010 03:53:00  | 27.0 | 11/18/2010 15:45:01 | 37.148 | 11/25/2010 19:37:01 | 34.110 |

|                   |      |                     |        |                     |        |
|-------------------|------|---------------------|--------|---------------------|--------|
| 4/2/2010 04:28:00 | 27.0 | 11/18/2010 16:05:01 | 35.965 | 11/25/2010 20:13:01 | 34.110 |
| 4/2/2010 05:03:00 | 27.0 | 11/18/2010 16:25:01 | 34.345 | 11/25/2010 20:49:01 | 34.110 |
| 4/2/2010 05:38:00 | 27.0 | 11/18/2010 16:45:01 | 33.473 | 11/25/2010 21:25:01 | 34.110 |
| 4/2/2010 06:13:00 | 27.0 | 11/18/2010 17:05:01 | 32.600 | 11/25/2010 22:01:01 | 34.110 |
| 4/2/2010 06:48:00 | 27.0 | 11/18/2010 17:25:01 | 31.602 | 11/25/2010 22:37:01 | 34.110 |
| 4/2/2010 07:23:00 | 27.0 | 11/18/2010 17:45:01 | 30.667 | 11/25/2010 23:13:01 | 34.110 |
| 4/2/2010 07:58:00 | 27.0 | 11/18/2010 18:05:01 | 29.668 | 11/25/2010 23:49:01 | 34.110 |
| 4/2/2010 08:33:00 | 27.0 | 11/18/2010 18:25:01 | 28.857 | 11/26/2010 00:25:01 | 33.612 |
| 4/2/2010 09:08:00 | 27.0 | 11/18/2010 18:45:01 | 28.357 | 11/26/2010 01:01:01 | 34.110 |
| 4/2/2010 09:43:00 | 27.0 | 11/18/2010 19:05:01 | 27.920 | 11/26/2010 01:37:01 | 34.110 |
| 4/2/2010 10:18:00 | 26.5 | 11/18/2010 19:25:01 | 27.546 | 11/26/2010 02:13:01 | 34.110 |
| 4/2/2010 10:53:00 | 26.5 | 11/18/2010 19:45:01 | 27.171 | 11/26/2010 02:49:01 | 33.612 |
| 4/2/2010 11:28:00 | 26.5 | 11/18/2010 20:05:01 | 26.671 | 11/26/2010 03:25:01 | 33.612 |
| 4/2/2010 12:03:00 | 27.0 | 11/18/2010 20:25:01 | 26.172 | 11/26/2010 04:01:01 | 33.612 |
| 4/2/2010 12:38:00 | 27.0 | 11/18/2010 20:45:01 | 25.672 | 11/26/2010 04:37:01 | 33.113 |
| 4/2/2010 13:13:00 | 27.0 | 11/18/2010 21:05:01 | 25.422 | 11/26/2010 05:13:01 | 33.113 |
| 4/2/2010 13:48:00 | 27.0 | 11/18/2010 21:25:01 | 24.859 | 11/26/2010 05:49:01 | 33.113 |
| 4/2/2010 14:23:00 | 27.0 | 11/18/2010 21:45:01 | 24.359 | 11/26/2010 06:25:01 | 33.113 |
| 4/2/2010 14:58:00 | 27.0 | 11/18/2010 22:05:01 | 23.984 | 11/26/2010 07:01:01 | 32.116 |
| 4/2/2010 15:33:00 | 27.0 | 11/18/2010 22:25:01 | 23.797 | 11/26/2010 07:37:01 | 31.617 |
| 4/2/2010 16:08:00 | 27.0 | 11/18/2010 22:45:01 | 23.609 | 11/26/2010 08:13:01 | 31.118 |
| 4/2/2010 16:43:00 | 27.0 | 11/18/2010 23:05:01 | 23.422 | 11/26/2010 08:49:01 | 31.118 |
| 4/2/2010 17:18:00 | 27.0 | 11/18/2010 23:25:01 | 23.297 | 11/26/2010 09:25:01 | 31.617 |
| 4/2/2010 17:53:00 | 27.0 | 11/18/2010 23:45:01 | 23.297 | 11/26/2010 10:01:01 | 32.116 |
| 4/2/2010 18:28:00 | 27.0 | 11/19/2010 00:05:01 | 23.547 | 11/26/2010 10:37:01 | 32.615 |
| 4/2/2010 19:03:00 | 27.0 | 11/19/2010 00:25:01 | 23.734 | 11/26/2010 11:13:01 | 33.113 |
| 4/2/2010 19:38:00 | 27.0 | 11/19/2010 00:45:01 | 24.047 | 11/26/2010 11:49:01 | 33.612 |
| 4/2/2010 20:13:00 | 27.0 | 11/19/2010 01:05:01 | 24.609 | 11/26/2010 12:25:01 | 33.612 |
| 4/2/2010 20:48:00 | 27.0 | 11/19/2010 01:25:01 | 24.547 | 11/26/2010 13:01:01 | 34.110 |
| 4/2/2010 21:23:00 | 27.0 | 11/19/2010 01:45:01 | 23.297 | 11/26/2010 13:37:01 | 34.110 |
| 4/2/2010 21:58:00 | 27.0 | 11/19/2010 02:05:01 | 22.984 | 11/26/2010 14:13:01 | 33.612 |
| 4/2/2010 22:33:00 | 27.0 | 11/19/2010 02:25:01 | 22.984 | 11/26/2010 14:49:01 | 33.612 |
| 4/2/2010 23:08:00 | 27.0 | 11/19/2010 02:45:01 | 22.984 | 11/26/2010 15:25:01 | 34.110 |
| 4/2/2010 23:43:00 | 27.0 | 11/19/2010 03:05:01 | 22.921 | 11/26/2010 16:01:01 | 34.110 |
| 4/3/2010 00:18:00 | 27.0 | 11/19/2010 03:25:01 | 22.859 | 11/26/2010 16:37:01 | 34.608 |
| 4/3/2010 00:53:00 | 27.0 | 11/19/2010 03:45:01 | 22.671 | 11/26/2010 17:13:01 | 34.608 |
| 4/3/2010 01:28:00 | 27.0 | 11/19/2010 04:05:01 | 22.796 | 11/26/2010 17:49:01 | 35.107 |
| 4/3/2010 02:03:00 | 27.0 | 11/19/2010 04:25:01 | 22.609 | 11/26/2010 18:25:01 | 34.608 |
| 4/3/2010 02:38:00 | 27.0 | 11/19/2010 04:45:01 | 22.296 | 11/26/2010 19:01:01 | 34.608 |
| 4/3/2010 03:13:00 | 27.0 | 11/19/2010 05:05:01 | 22.108 | 11/26/2010 19:37:01 | 34.608 |
| 4/3/2010 03:48:00 | 27.0 | 11/19/2010 05:25:01 | 21.983 | 11/26/2010 20:13:01 | 34.608 |
| 4/3/2010 04:23:00 | 27.0 | 11/19/2010 05:45:01 | 21.921 | 11/26/2010 20:49:01 | 34.608 |
| 4/3/2010 04:58:00 | 27.0 | 11/19/2010 06:05:01 | 22.046 | 11/26/2010 21:25:01 | 34.608 |
| 4/3/2010 05:33:00 | 27.0 | 11/19/2010 06:25:01 | 22.484 | 11/26/2010 22:01:01 | 34.608 |
| 4/3/2010 06:08:00 | 27.0 | 11/19/2010 06:45:01 | 23.234 | 11/26/2010 22:37:01 | 34.608 |
| 4/3/2010 06:43:00 | 27.0 | 11/19/2010 07:05:01 | 25.609 | 11/26/2010 23:13:01 | 34.110 |
| 4/3/2010 07:18:00 | 27.0 | 11/19/2010 07:25:01 | 28.482 | 11/26/2010 23:49:01 | 34.608 |
| 4/3/2010 07:53:00 | 27.0 | 11/19/2010 07:45:01 | 29.793 | 11/27/2010 00:25:01 | 34.110 |
| 4/3/2010 08:28:00 | 27.0 | 11/19/2010 08:05:01 | 30.916 | 11/27/2010 01:01:01 | 34.110 |
| 4/3/2010 09:03:00 | 26.5 | 11/19/2010 08:25:01 | 32.039 | 11/27/2010 01:37:01 | 34.110 |

|                   |      |                     |        |                     |        |
|-------------------|------|---------------------|--------|---------------------|--------|
| 4/3/2010 09:38:00 | 26.5 | 11/19/2010 08:45:01 | 33.036 | 11/27/2010 02:13:01 | 34.110 |
| 4/3/2010 10:13:00 | 27.0 | 11/19/2010 09:05:01 | 34.719 | 11/27/2010 02:49:01 | 34.110 |
| 4/3/2010 10:48:00 | 27.0 | 11/19/2010 09:25:01 | 34.470 | 11/27/2010 03:25:01 | 34.110 |
| 4/3/2010 11:23:00 | 27.0 | 11/19/2010 09:45:01 | 38.144 | 11/27/2010 04:01:01 | 34.110 |
| 4/3/2010 11:58:00 | 27.0 | 11/19/2010 10:05:01 | 39.140 | 11/27/2010 04:37:01 | 33.113 |
| 4/3/2010 12:33:00 | 27.0 | 11/19/2010 10:25:01 | 36.339 | 11/27/2010 05:13:01 | 33.612 |
| 4/3/2010 13:08:00 | 27.0 | 11/19/2010 10:45:01 | 34.968 | 11/27/2010 05:49:01 | 33.612 |
| 4/3/2010 13:43:00 | 27.0 | 11/19/2010 11:05:01 | 33.847 | 11/27/2010 06:25:01 | 33.113 |
| 4/3/2010 14:18:00 | 27.0 | 11/19/2010 11:25:01 | 34.345 | 11/27/2010 07:01:01 | 33.612 |
| 4/3/2010 14:53:00 | 27.0 | 11/19/2010 11:45:01 | 35.841 | 11/27/2010 07:37:01 | 33.113 |
| 4/3/2010 15:28:00 | 27.0 | 11/19/2010 12:05:01 | 37.273 | 11/27/2010 08:13:01 | 33.612 |
| 4/3/2010 16:03:00 | 27.0 | 11/19/2010 12:25:01 | 38.269 | 11/27/2010 08:49:01 | 33.113 |
| 4/3/2010 16:38:00 | 27.0 | 11/19/2010 12:45:01 | 36.526 | 11/27/2010 09:25:01 | 33.113 |
| 4/3/2010 17:13:00 | 27.0 | 11/19/2010 13:05:01 | 36.712 | 11/27/2010 10:01:01 | 33.113 |
| 4/3/2010 17:48:00 | 27.0 | 11/19/2010 13:25:01 | 35.155 | 11/27/2010 10:37:01 | 33.612 |
| 4/3/2010 18:23:00 | 27.0 | 11/19/2010 13:45:01 | 37.522 | 11/27/2010 11:13:01 | 33.612 |
| 4/3/2010 18:58:00 | 27.0 | 11/19/2010 14:05:01 | 40.260 | 11/27/2010 11:49:01 | 33.612 |
| 4/3/2010 19:33:00 | 27.0 | 11/19/2010 14:25:01 | 34.844 | 11/27/2010 12:25:01 | 33.612 |
| 4/3/2010 20:08:00 | 27.0 | 11/19/2010 14:45:01 | 29.668 | 11/27/2010 13:01:01 | 33.612 |
| 4/3/2010 20:43:00 | 27.0 | 11/19/2010 15:05:01 | 26.609 | 11/27/2010 13:37:01 | 33.612 |
| 4/3/2010 21:18:00 | 27.0 | 11/19/2010 15:25:01 | 24.922 | 11/27/2010 14:13:01 | 33.113 |
| 4/3/2010 21:53:00 | 27.0 | 11/19/2010 15:45:01 | 24.609 | 11/27/2010 14:49:01 | 33.612 |
| 4/3/2010 22:28:00 | 27.0 | 11/19/2010 16:05:01 | 24.797 | 11/27/2010 15:25:01 | 33.612 |
| 4/3/2010 23:03:00 | 27.0 | 11/19/2010 16:25:01 | 24.672 | 11/27/2010 16:01:01 | 33.612 |
| 4/3/2010 23:38:00 | 27.0 | 11/19/2010 16:45:01 | 24.359 | 11/27/2010 16:37:01 | 34.110 |
| 4/4/2010 00:13:00 | 27.0 | 11/19/2010 17:05:01 | 24.234 | 11/27/2010 17:13:01 | 34.608 |
| 4/4/2010 00:48:00 | 27.0 | 11/19/2010 17:25:01 | 24.109 | 11/27/2010 17:49:01 | 34.608 |
| 4/4/2010 01:23:00 | 27.0 | 11/19/2010 17:45:01 | 24.109 | 11/27/2010 18:25:01 | 34.110 |
| 4/4/2010 01:58:00 | 27.0 | 11/19/2010 18:05:01 | 24.109 | 11/27/2010 19:01:01 | 34.110 |
| 4/4/2010 02:33:00 | 27.0 | 11/19/2010 18:25:01 | 24.109 | 11/27/2010 19:37:01 | 34.110 |
| 4/4/2010 03:08:00 | 27.0 | 11/19/2010 18:45:01 | 23.984 | 11/27/2010 20:13:01 | 34.110 |
| 4/4/2010 03:43:00 | 27.0 | 11/19/2010 19:05:01 | 23.984 | 11/27/2010 20:49:01 | 34.110 |
| 4/4/2010 04:18:00 | 27.0 | 11/19/2010 19:25:01 | 23.922 | 11/27/2010 21:25:01 | 34.110 |
| 4/4/2010 04:53:00 | 27.0 | 11/19/2010 19:45:01 | 23.797 | 11/27/2010 22:01:01 | 34.110 |
| 4/4/2010 05:28:00 | 27.0 | 11/19/2010 20:05:01 | 23.609 | 11/27/2010 22:37:01 | 34.608 |
| 4/4/2010 06:03:00 | 27.0 | 11/19/2010 20:25:01 | 23.422 | 11/27/2010 23:13:01 | 34.110 |
| 4/4/2010 06:38:00 | 27.0 | 11/19/2010 20:45:01 | 23.422 | 11/27/2010 23:49:01 | 34.110 |
| 4/4/2010 07:13:00 | 27.0 | 11/19/2010 21:05:01 | 23.234 | 11/28/2010 00:25:01 | 34.110 |
| 4/4/2010 07:48:00 | 27.0 | 11/19/2010 21:25:01 | 23.234 | 11/28/2010 01:01:01 | 34.110 |
| 4/4/2010 08:23:00 | 27.0 | 11/19/2010 21:45:01 | 23.172 | 11/28/2010 01:37:01 | 34.110 |
| 4/4/2010 08:58:00 | 27.0 | 11/19/2010 22:05:01 | 23.359 | 11/28/2010 02:13:01 | 34.110 |
| 4/4/2010 09:33:00 | 27.0 | 11/19/2010 22:25:01 | 23.484 | 11/28/2010 02:49:01 | 34.110 |
| 4/4/2010 10:08:00 | 27.0 | 11/19/2010 22:45:01 | 23.672 | 11/28/2010 03:25:01 | 34.110 |
| 4/4/2010 10:43:00 | 27.0 | 11/19/2010 23:05:01 | 23.609 | 11/28/2010 04:01:01 | 33.612 |
| 4/4/2010 11:18:00 | 27.0 | 11/19/2010 23:25:01 | 23.484 | 11/28/2010 04:37:01 | 33.612 |
| 4/4/2010 11:53:00 | 26.5 | 11/19/2010 23:45:01 | 22.796 | 11/28/2010 05:13:01 | 33.113 |
| 4/4/2010 12:28:00 | 27.0 | 11/20/2010 00:05:01 | 21.921 | 11/28/2010 05:49:01 | 33.612 |
| 4/4/2010 13:03:00 | 27.0 | 11/20/2010 00:25:01 | 21.295 | 11/28/2010 06:25:01 | 33.612 |
| 4/4/2010 13:38:00 | 27.0 | 11/20/2010 00:45:01 | 20.920 | 11/28/2010 07:01:01 | 33.113 |
| 4/4/2010 14:13:00 | 27.0 | 11/20/2010 01:05:01 | 20.920 | 11/28/2010 07:37:01 | 33.113 |

|                   |      |                     |        |                     |        |
|-------------------|------|---------------------|--------|---------------------|--------|
| 4/4/2010 14:48:00 | 27.0 | 11/20/2010 01:25:01 | 20.857 | 11/28/2010 08:13:01 | 33.113 |
| 4/4/2010 15:23:00 | 27.0 | 11/20/2010 01:45:01 | 20.795 | 11/28/2010 08:49:01 | 33.113 |
| 4/4/2010 15:58:00 | 27.0 | 11/20/2010 02:05:01 | 20.795 | 11/28/2010 09:25:01 | 33.612 |
| 4/4/2010 16:33:00 | 27.0 | 11/20/2010 02:25:01 | 20.732 | 11/28/2010 10:01:01 | 33.612 |
| 4/4/2010 17:08:00 | 27.0 | 11/20/2010 02:45:01 | 20.732 | 11/28/2010 10:37:01 | 34.110 |
| 4/4/2010 17:43:00 | 27.0 | 11/20/2010 03:05:01 | 20.795 | 11/28/2010 11:13:01 | 34.110 |
| 4/4/2010 18:18:00 | 27.0 | 11/20/2010 03:25:01 | 20.920 | 11/28/2010 11:49:01 | 34.110 |
| 4/4/2010 18:53:00 | 27.0 | 11/20/2010 03:45:01 | 20.857 | 11/28/2010 12:25:01 | 34.110 |
| 4/4/2010 19:28:00 | 27.5 | 11/20/2010 04:05:01 | 20.857 | 11/28/2010 13:01:01 | 34.608 |
| 4/4/2010 20:03:00 | 27.5 | 11/20/2010 04:25:01 | 20.857 | 11/28/2010 13:37:01 | 34.608 |
| 4/4/2010 20:38:00 | 27.0 | 11/20/2010 04:45:01 | 20.795 | 11/28/2010 14:13:01 | 34.608 |
| 4/4/2010 21:13:00 | 27.0 | 11/20/2010 05:05:01 | 20.920 | 11/28/2010 14:49:01 | 34.608 |
| 4/4/2010 21:48:00 | 27.0 | 11/20/2010 05:25:01 | 20.857 | 11/28/2010 15:25:01 | 34.608 |
| 4/4/2010 22:23:00 | 27.0 | 11/20/2010 05:45:01 | 20.982 | 11/28/2010 16:01:01 | 35.107 |
| 4/4/2010 22:58:00 | 27.0 | 11/20/2010 06:05:01 | 21.358 | 11/28/2010 16:37:01 | 35.107 |
| 4/4/2010 23:33:00 | 27.0 | 11/20/2010 06:25:01 | 21.796 | 11/28/2010 17:13:01 | 34.608 |
| 4/5/2010 00:08:00 | 27.0 | 11/20/2010 06:45:01 | 22.108 | 11/28/2010 17:49:01 | 34.110 |
| 4/5/2010 00:43:00 | 27.0 | 11/20/2010 07:05:01 | 22.609 | 11/28/2010 18:25:01 | 34.110 |
| 4/5/2010 01:18:00 | 27.0 | 11/20/2010 07:25:01 | 23.047 | 11/28/2010 19:01:01 | 34.110 |
| 4/5/2010 01:53:00 | 27.0 | 11/20/2010 07:45:01 | 23.922 | 11/28/2010 19:37:01 | 34.110 |
| 4/5/2010 02:28:00 | 27.0 | 11/20/2010 08:05:01 | 25.234 | 11/28/2010 20:13:01 | 34.110 |
| 4/5/2010 03:03:00 | 27.0 | 11/20/2010 08:25:01 | 26.234 | 11/28/2010 20:49:01 | 34.110 |
| 4/5/2010 03:38:00 | 27.0 | 11/20/2010 08:45:01 | 27.046 | 11/28/2010 21:25:01 | 34.110 |
| 4/5/2010 04:13:00 | 27.0 | 11/20/2010 09:05:01 | 28.857 | 11/28/2010 22:01:01 | 34.110 |
| 4/5/2010 04:48:00 | 27.0 | 11/20/2010 09:25:01 | 30.355 | 11/28/2010 22:37:01 | 34.110 |
| 4/5/2010 05:23:00 | 27.0 | 11/20/2010 09:45:01 | 32.912 | 11/28/2010 23:13:01 | 34.110 |
| 4/5/2010 05:58:00 | 27.0 | 11/20/2010 10:05:01 | 32.288 | 11/28/2010 23:49:01 | 34.110 |
| 4/5/2010 06:33:00 | 26.5 | 11/20/2010 10:25:01 | 32.475 | 11/29/2010 00:25:01 | 34.110 |
| 4/5/2010 07:08:00 | 26.5 | 11/20/2010 10:45:01 | 30.916 | 11/29/2010 01:01:01 | 34.110 |
| 4/5/2010 07:43:00 | 26.5 | 11/20/2010 11:05:01 | 33.784 | 11/29/2010 01:37:01 | 34.110 |
| 4/5/2010 08:18:00 | 26.5 | 11/20/2010 11:25:01 | 35.280 | 11/29/2010 02:13:01 | 34.110 |
| 4/5/2010 08:53:00 | 26.5 | 11/20/2010 11:45:01 | 35.093 | 11/29/2010 02:49:01 | 34.110 |
| 4/5/2010 09:28:00 | 26.5 | 11/20/2010 12:05:01 | 34.221 | 11/29/2010 03:25:01 | 34.110 |
| 4/5/2010 10:03:00 | 26.5 | 11/20/2010 12:25:01 | 35.404 | 11/29/2010 04:01:01 | 33.113 |
| 4/5/2010 10:38:00 | 26.5 | 11/20/2010 12:45:01 | 37.211 | 11/29/2010 04:37:01 | 33.612 |
| 4/5/2010 11:13:00 | 26.5 | 11/20/2010 13:05:01 | 34.906 | 11/29/2010 05:13:01 | 34.110 |
| 4/5/2010 11:48:00 | 26.5 | 11/20/2010 13:25:01 | 35.342 | 11/29/2010 05:49:01 | 34.110 |
| 4/5/2010 12:23:00 | 26.5 | 11/20/2010 13:45:01 | 36.712 | 11/29/2010 06:25:01 | 34.110 |
| 4/5/2010 12:58:00 | 26.5 | 11/20/2010 14:05:01 | 34.968 | 11/29/2010 07:01:01 | 34.110 |
| 4/5/2010 13:33:00 | 26.5 | 11/20/2010 14:25:01 | 36.214 | 11/29/2010 07:37:01 | 34.110 |
| 4/5/2010 14:08:00 | 26.5 | 11/20/2010 14:45:01 | 33.473 | 11/29/2010 08:13:01 | 34.110 |
| 4/5/2010 14:43:00 | 26.5 | 11/20/2010 15:05:01 | 33.597 | 11/29/2010 08:49:01 | 33.612 |
| 4/5/2010 15:18:00 | 26.5 | 11/20/2010 15:25:01 | 33.036 | 11/29/2010 09:25:01 | 33.612 |
| 4/5/2010 15:53:00 | 26.5 | 11/20/2010 15:45:01 | 33.660 | 11/29/2010 10:01:01 | 33.612 |
| 4/5/2010 16:28:00 | 26.5 | 11/20/2010 16:05:01 | 33.410 | 11/29/2010 10:37:01 | 33.612 |
| 4/5/2010 17:03:00 | 27.0 | 11/20/2010 16:25:01 | 31.976 | 11/29/2010 11:13:01 | 33.612 |
| 4/5/2010 17:38:00 | 27.0 | 11/20/2010 16:45:01 | 28.857 | 11/29/2010 11:49:01 | 33.612 |
| 4/5/2010 18:13:00 | 27.0 | 11/20/2010 17:05:01 | 27.421 | 11/29/2010 12:25:01 | 33.612 |
| 4/5/2010 18:48:00 | 27.0 | 11/20/2010 17:25:01 | 27.796 | 11/29/2010 13:01:01 | 33.612 |
| 4/5/2010 19:23:00 | 27.0 | 11/20/2010 17:45:01 | 25.797 | 11/29/2010 13:37:01 | 33.612 |

|                   |      |                     |        |                     |        |
|-------------------|------|---------------------|--------|---------------------|--------|
| 4/5/2010 19:58:00 | 27.0 | 11/20/2010 18:05:01 | 24.859 | 11/29/2010 14:13:01 | 33.612 |
| 4/5/2010 20:33:00 | 27.0 | 11/20/2010 18:25:01 | 24.172 | 11/29/2010 14:49:01 | 33.113 |
| 4/5/2010 21:08:00 | 27.0 | 11/20/2010 18:45:01 | 23.672 | 11/29/2010 15:25:01 | 33.113 |
| 4/5/2010 21:43:00 | 27.0 | 11/20/2010 19:05:01 | 23.359 | 11/29/2010 16:01:01 | 33.113 |
| 4/5/2010 22:18:00 | 27.0 | 11/20/2010 19:25:01 | 23.172 | 11/29/2010 16:37:01 | 32.615 |
| 4/5/2010 22:53:00 | 27.0 | 11/20/2010 19:45:01 | 23.047 | 11/29/2010 17:13:01 | 32.615 |
| 4/5/2010 23:28:00 | 27.0 | 11/20/2010 20:05:01 | 22.921 | 11/29/2010 17:49:01 | 33.113 |
| 4/6/2010 00:03:00 | 27.0 | 11/20/2010 20:25:01 | 22.921 | 11/29/2010 18:25:01 | 33.113 |
| 4/6/2010 00:38:00 | 27.0 | 11/20/2010 20:45:01 | 22.984 | 11/29/2010 19:01:01 | 33.113 |
| 4/6/2010 01:13:00 | 27.0 | 11/20/2010 21:05:01 | 23.047 | 11/29/2010 19:37:01 | 33.612 |
| 4/6/2010 01:48:00 | 27.0 | 11/20/2010 21:25:01 | 23.109 | 11/29/2010 20:13:01 | 34.110 |
| 4/6/2010 02:23:00 | 27.0 | 11/20/2010 21:45:01 | 23.109 | 11/29/2010 20:49:01 | 34.110 |
| 4/6/2010 02:58:00 | 27.0 | 11/20/2010 22:05:01 | 23.234 | 11/29/2010 21:25:01 | 34.110 |
| 4/6/2010 03:33:00 | 27.0 | 11/20/2010 22:25:01 | 23.359 | 11/29/2010 22:01:01 | 34.110 |
| 4/6/2010 04:08:00 | 27.0 | 11/20/2010 22:45:01 | 23.422 | 11/29/2010 22:37:01 | 34.608 |
| 4/6/2010 04:43:00 | 27.0 | 11/20/2010 23:05:01 | 23.297 | 11/29/2010 23:13:01 | 34.608 |
| 4/6/2010 05:18:00 | 26.5 | 11/20/2010 23:25:01 | 23.297 | 11/29/2010 23:49:01 | 34.608 |
| 4/6/2010 05:53:00 | 26.5 | 11/20/2010 23:45:01 | 23.422 | 11/30/2010 00:25:01 | 34.608 |
| 4/6/2010 06:28:00 | 26.5 | 11/21/2010 00:05:01 | 23.422 | 11/30/2010 01:01:01 | 34.608 |
| 4/6/2010 07:03:00 | 26.5 | 11/21/2010 00:25:01 | 23.484 | 11/30/2010 01:37:01 | 34.608 |
| 4/6/2010 07:38:00 | 26.5 | 11/21/2010 00:45:01 | 23.672 | 11/30/2010 02:13:01 | 34.608 |
| 4/6/2010 08:13:00 | 26.5 | 11/21/2010 01:05:01 | 23.609 | 11/30/2010 02:49:01 | 34.608 |
| 4/6/2010 08:48:00 | 26.5 | 11/21/2010 01:25:01 | 23.547 | 11/30/2010 03:25:01 | 34.110 |
| 4/6/2010 09:23:00 | 26.5 | 11/21/2010 01:45:01 | 23.609 | 11/30/2010 04:01:01 | 34.608 |
| 4/6/2010 09:58:00 | 26.5 | 11/21/2010 02:05:01 | 23.672 | 11/30/2010 04:37:01 | 34.110 |
| 4/6/2010 10:33:00 | 26.5 | 11/21/2010 02:25:01 | 23.734 | 11/30/2010 05:13:01 | 33.612 |
| 4/6/2010 11:08:00 | 26.5 | 11/21/2010 02:45:01 | 22.484 | 11/30/2010 05:49:01 | 33.612 |
| 4/6/2010 11:43:00 | 26.5 | 11/21/2010 03:05:01 | 21.170 | 11/30/2010 06:25:01 | 33.612 |
| 4/6/2010 12:18:00 | 26.5 | 11/21/2010 03:25:01 | 21.107 | 11/30/2010 07:01:01 | 33.113 |
| 4/6/2010 12:53:00 | 26.5 | 11/21/2010 03:45:01 | 21.045 | 11/30/2010 07:37:01 | 33.113 |
| 4/6/2010 13:28:00 | 26.5 | 11/21/2010 04:05:01 | 21.107 | 11/30/2010 08:13:01 | 33.113 |
| 4/6/2010 14:03:00 | 26.5 | 11/21/2010 04:25:01 | 21.107 | 11/30/2010 08:49:01 | 33.113 |
| 4/6/2010 14:38:00 | 26.5 | 11/21/2010 04:45:01 | 21.170 | 11/30/2010 09:25:01 | 33.113 |
| 4/6/2010 15:13:00 | 26.5 | 11/21/2010 05:05:01 | 20.920 | 11/30/2010 10:01:01 | 33.113 |
| 4/6/2010 15:48:00 | 26.5 | 11/21/2010 05:25:01 | 20.857 | 11/30/2010 10:37:01 | 33.113 |
| 4/6/2010 16:23:00 | 26.5 | 11/21/2010 05:45:01 | 20.920 | 11/30/2010 11:13:01 | 33.612 |
| 4/6/2010 16:58:00 | 26.5 | 11/21/2010 06:05:01 | 20.857 | 11/30/2010 11:49:01 | 33.612 |
| 4/6/2010 17:33:00 | 26.5 | 11/21/2010 06:25:01 | 20.607 | 11/30/2010 12:25:01 | 33.612 |
| 4/6/2010 18:08:00 | 26.5 | 11/21/2010 06:45:01 | 20.669 | 11/30/2010 13:01:01 | 33.113 |
| 4/6/2010 18:43:00 | 26.5 | 11/21/2010 07:05:01 | 20.857 | 11/30/2010 13:37:01 | 33.113 |
| 4/6/2010 19:18:00 | 26.5 | 11/21/2010 07:25:01 | 20.920 | 11/30/2010 14:13:01 | 33.113 |
| 4/6/2010 19:53:00 | 26.5 | 11/21/2010 07:45:01 | 21.295 | 11/30/2010 14:49:01 | 33.113 |
| 4/6/2010 20:28:00 | 27.0 | 11/21/2010 08:05:01 | 21.796 | 11/30/2010 15:25:01 | 33.113 |
| 4/6/2010 21:03:00 | 27.0 | 11/21/2010 08:25:01 | 22.296 | 11/30/2010 16:01:01 | 33.113 |
| 4/6/2010 21:38:00 | 27.0 | 11/21/2010 08:45:01 | 23.234 | 11/30/2010 16:37:01 | 33.113 |
| 4/6/2010 22:13:00 | 27.0 | 11/21/2010 09:05:01 | 24.297 | 11/30/2010 17:13:01 | 33.113 |
| 4/6/2010 22:48:00 | 27.0 | 11/21/2010 09:25:01 | 25.359 | 11/30/2010 17:49:01 | 33.113 |
| 4/6/2010 23:23:00 | 27.0 | 11/21/2010 09:45:01 | 26.109 | 11/30/2010 18:25:01 | 33.113 |
| 4/6/2010 23:58:00 | 27.0 | 11/21/2010 10:05:01 | 28.545 | 11/30/2010 19:01:01 | 33.612 |
| 4/7/2010 00:33:00 | 27.0 | 11/21/2010 10:25:01 | 30.230 | 11/30/2010 19:37:01 | 34.110 |

|                   |      |                     |        |                     |        |
|-------------------|------|---------------------|--------|---------------------|--------|
| 4/7/2010 01:08:00 | 27.0 | 11/21/2010 10:45:01 | 30.667 | 11/30/2010 20:13:01 | 34.110 |
| 4/7/2010 01:43:00 | 27.0 | 11/21/2010 11:05:01 | 32.101 | 11/30/2010 20:49:01 | 34.608 |
| 4/7/2010 02:18:00 | 26.5 | 11/21/2010 11:25:01 | 31.228 | 11/30/2010 21:25:01 | 34.608 |
| 4/7/2010 02:53:00 | 26.5 | 11/21/2010 11:45:01 | 31.228 | 11/30/2010 22:01:01 | 34.608 |
| 4/7/2010 03:28:00 | 26.5 | 11/21/2010 12:05:01 | 29.668 | 11/30/2010 22:37:01 | 34.608 |
| 4/7/2010 04:03:00 | 26.5 | 11/21/2010 12:25:01 | 28.233 | 11/30/2010 23:13:01 | 34.110 |
| 4/7/2010 04:38:00 | 26.5 | 11/21/2010 12:45:01 | 27.920 | 11/30/2010 23:49:01 | 34.608 |
| 4/7/2010 05:13:00 | 26.5 | 11/21/2010 13:05:01 | 25.859 | 12/1/2010 00:25:01  | 34.608 |
| 4/7/2010 05:48:00 | 26.5 | 11/21/2010 13:25:01 | 26.921 | 12/1/2010 01:01:01  | 34.608 |
| 4/7/2010 06:23:00 | 26.5 | 11/21/2010 13:45:01 | 29.668 | 12/1/2010 01:37:01  | 34.608 |
| 4/7/2010 06:58:00 | 26.5 | 11/21/2010 14:05:01 | 31.540 | 12/1/2010 02:13:01  | 34.608 |
| 4/7/2010 07:33:00 | 26.5 | 11/21/2010 14:25:01 | 32.351 | 12/1/2010 02:49:01  | 34.608 |
| 4/7/2010 08:08:00 | 26.5 | 11/21/2010 14:45:01 | 32.538 | 12/1/2010 03:25:01  | 34.608 |
| 4/7/2010 08:43:00 | 26.5 | 11/21/2010 15:05:01 | 30.791 | 12/1/2010 04:01:01  | 34.608 |
| 4/7/2010 09:18:00 | 26.5 | 11/21/2010 15:25:01 | 29.107 | 12/1/2010 04:37:01  | 34.110 |
| 4/7/2010 09:53:00 | 26.5 | 11/21/2010 15:45:01 | 28.233 | 12/1/2010 05:13:01  | 33.113 |
| 4/7/2010 10:28:00 | 26.5 | 11/21/2010 16:05:01 | 27.296 | 12/1/2010 05:49:01  | 32.615 |
| 4/7/2010 11:03:00 | 26.5 | 11/21/2010 16:25:01 | 25.547 | 12/1/2010 06:25:01  | 33.113 |
| 4/7/2010 11:38:00 | 26.5 | 11/21/2010 16:45:01 | 24.859 | 12/1/2010 07:01:01  | 33.612 |
| 4/7/2010 12:13:00 | 26.5 | 11/21/2010 17:05:01 | 24.484 | 12/1/2010 07:37:01  | 34.110 |
| 4/7/2010 12:48:00 | 26.5 | 11/21/2010 17:25:01 | 23.547 | 12/1/2010 08:13:01  | 34.110 |
| 4/7/2010 13:23:00 | 26.5 | 11/21/2010 17:45:01 | 23.109 | 12/1/2010 08:49:01  | 34.110 |
| 4/7/2010 13:58:00 | 26.5 | 11/21/2010 18:05:01 | 23.047 | 12/1/2010 09:25:01  | 34.110 |
| 4/7/2010 14:33:00 | 26.5 | 11/21/2010 18:25:01 | 22.921 | 12/1/2010 10:01:01  | 34.110 |
| 4/7/2010 15:08:00 | 26.5 | 11/21/2010 18:45:01 | 22.859 | 12/1/2010 10:37:01  | 34.608 |
| 4/7/2010 15:43:00 | 26.5 | 11/21/2010 19:05:01 | 22.859 | 12/1/2010 11:13:01  | 34.608 |
| 4/7/2010 16:18:00 | 26.5 | 11/21/2010 19:25:01 | 22.921 | 12/1/2010 11:49:01  | 35.107 |
| 4/7/2010 16:53:00 | 27.0 | 11/21/2010 19:45:01 | 22.921 | 12/1/2010 12:25:01  | 35.107 |
| 4/7/2010 17:28:00 | 27.0 | 11/21/2010 20:05:01 | 22.921 | 12/1/2010 13:01:01  | 35.107 |
| 4/7/2010 18:03:00 | 27.0 | 11/21/2010 20:25:01 | 22.859 | 12/1/2010 13:37:01  | 35.107 |
| 4/7/2010 18:38:00 | 27.0 | 11/21/2010 20:45:01 | 22.859 | 12/1/2010 14:13:01  | 35.107 |
| 4/7/2010 19:13:00 | 27.0 | 11/21/2010 21:05:01 | 22.671 | 12/1/2010 14:49:01  | 35.107 |
| 4/7/2010 19:48:00 | 27.0 | 11/21/2010 21:25:01 | 22.484 | 12/1/2010 15:25:01  | 35.107 |
| 4/7/2010 20:23:00 | 27.0 | 11/21/2010 21:45:01 | 22.296 | 12/1/2010 16:01:01  | 34.608 |
| 4/7/2010 20:58:00 | 27.0 | 11/21/2010 22:05:01 | 22.234 | 12/1/2010 16:37:01  | 34.608 |
| 4/7/2010 21:33:00 | 27.0 | 11/21/2010 22:25:01 | 22.171 | 12/1/2010 17:13:01  | 34.110 |
| 4/7/2010 22:08:00 | 27.0 | 11/21/2010 22:45:01 | 22.046 | 12/1/2010 17:49:01  | 34.608 |
| 4/7/2010 22:43:00 | 27.0 | 11/21/2010 23:05:01 | 22.046 | 12/1/2010 18:25:01  | 34.608 |
| 4/7/2010 23:18:00 | 27.0 | 11/21/2010 23:25:01 | 21.983 | 12/1/2010 19:01:01  | 34.608 |
| 4/7/2010 23:53:00 | 27.0 | 11/21/2010 23:45:01 | 21.983 | 12/1/2010 19:37:01  | 34.608 |
| 4/8/2010 00:28:00 | 27.0 | 11/22/2010 00:05:01 | 21.921 | 12/1/2010 20:13:01  | 34.608 |
| 4/8/2010 01:03:00 | 27.0 | 11/22/2010 00:25:01 | 21.858 | 12/1/2010 20:49:01  | 34.608 |
| 4/8/2010 01:38:00 | 27.0 | 11/22/2010 00:45:01 | 21.796 | 12/1/2010 21:25:01  | 34.110 |
| 4/8/2010 02:13:00 | 27.0 | 11/22/2010 01:05:01 | 21.858 | 12/1/2010 22:01:01  | 34.110 |
| 4/8/2010 02:48:00 | 27.0 | 11/22/2010 01:25:01 | 21.858 | 12/1/2010 22:37:01  | 34.110 |
| 4/8/2010 03:23:00 | 27.0 | 11/22/2010 01:45:01 | 21.796 | 12/1/2010 23:13:01  | 34.110 |
| 4/8/2010 03:58:00 | 27.0 | 11/22/2010 02:05:01 | 21.858 | 12/1/2010 23:49:01  | 34.110 |
| 4/8/2010 04:33:00 | 27.0 | 11/22/2010 02:25:01 | 21.858 | 12/2/2010 00:25:01  | 34.110 |
| 4/8/2010 05:08:00 | 27.0 | 11/22/2010 02:45:01 | 21.858 | 12/2/2010 01:01:01  | 34.110 |
| 4/8/2010 05:43:00 | 27.0 | 11/22/2010 03:05:01 | 21.983 | 12/2/2010 01:37:01  | 34.110 |



|                   |      |                     |        |                    |        |
|-------------------|------|---------------------|--------|--------------------|--------|
| 4/8/2010 06:18:00 | 27.0 | 11/22/2010 03:25:01 | 22.108 | 12/2/2010 02:13:01 | 34.608 |
| 4/8/2010 06:53:00 | 27.0 | 11/22/2010 03:45:01 | 22.171 | 12/2/2010 02:49:01 | 34.608 |
| 4/8/2010 07:28:00 | 27.0 | 11/22/2010 04:05:01 | 22.359 | 12/2/2010 03:25:01 | 34.608 |
| 4/8/2010 08:03:00 | 27.0 | 11/22/2010 04:25:01 | 22.296 | 12/2/2010 04:01:01 | 34.110 |
| 4/8/2010 08:38:00 | 26.5 | 11/22/2010 04:45:01 | 22.296 | 12/2/2010 04:37:01 | 33.612 |
| 4/8/2010 09:13:00 | 26.5 | 11/22/2010 05:05:01 | 22.234 | 12/2/2010 05:13:01 | 33.612 |
| 4/8/2010 09:48:00 | 26.5 | 11/22/2010 05:25:01 | 22.234 | 12/2/2010 05:49:01 | 33.612 |
| 4/8/2010 10:23:00 | 26.5 | 11/22/2010 05:45:01 | 22.359 | 12/2/2010 06:25:01 | 33.612 |
| 4/8/2010 10:58:00 | 26.5 | 11/22/2010 06:05:01 | 22.671 | 12/2/2010 07:01:01 | 34.110 |
| 4/8/2010 11:33:00 | 26.5 | 11/22/2010 06:25:01 | 23.047 | 12/2/2010 07:37:01 | 34.608 |
| 4/8/2010 12:08:00 | 26.5 | 11/22/2010 06:45:01 | 23.359 | 12/2/2010 08:13:01 | 35.107 |
| 4/8/2010 12:43:00 | 26.5 | 11/22/2010 07:05:01 | 23.859 | 12/2/2010 08:49:01 | 35.107 |
| 4/8/2010 13:18:00 | 26.5 | 11/22/2010 07:25:01 | 25.234 | 12/2/2010 09:25:01 | 35.107 |
| 4/8/2010 13:53:00 | 26.5 | 11/22/2010 07:45:01 | 26.734 | 12/2/2010 10:01:01 | 34.608 |
| 4/8/2010 14:28:00 | 27.0 | 11/22/2010 08:05:01 | 28.295 | 12/2/2010 10:37:01 | 34.608 |
| 4/8/2010 15:03:00 | 27.0 | 11/22/2010 08:25:01 | 29.231 | 12/2/2010 11:13:01 | 34.110 |
| 4/8/2010 15:38:00 | 27.0 | 11/22/2010 08:45:01 | 29.731 | 12/2/2010 11:49:01 | 34.110 |
| 4/8/2010 16:13:00 | 27.0 | 11/22/2010 09:05:01 | 31.290 | 12/2/2010 12:25:01 | 34.110 |
| 4/8/2010 16:48:00 | 27.0 | 11/22/2010 09:25:01 | 32.226 | 12/2/2010 13:01:01 | 34.110 |
| 4/8/2010 17:23:00 | 27.0 | 11/22/2010 09:45:01 | 33.847 | 12/2/2010 13:37:01 | 34.608 |
| 4/8/2010 17:58:00 | 27.0 | 11/22/2010 10:05:01 | 33.784 | 12/2/2010 14:13:01 | 34.608 |
| 4/8/2010 18:33:00 | 27.0 | 11/22/2010 10:25:01 | 33.971 | 12/2/2010 14:49:01 | 34.608 |
| 4/8/2010 19:08:00 | 27.0 | 11/22/2010 10:45:01 | 35.093 | 12/2/2010 15:25:01 | 34.110 |
| 4/8/2010 19:43:00 | 27.0 | 11/22/2010 11:05:01 | 35.404 | 12/2/2010 16:01:01 | 34.110 |
| 4/8/2010 20:18:00 | 27.0 | 11/22/2010 11:25:01 | 35.965 | 12/2/2010 16:37:01 | 34.608 |
| 4/8/2010 20:53:00 | 27.0 | 11/22/2010 11:45:01 | 36.027 | 12/2/2010 17:13:01 | 34.608 |
| 4/8/2010 21:28:00 | 27.0 | 11/22/2010 12:05:01 | 36.775 | 12/2/2010 17:49:01 | 34.110 |
| 4/8/2010 22:03:00 | 27.0 | 11/22/2010 12:25:01 | 36.962 | 12/2/2010 18:25:01 | 34.110 |
| 4/8/2010 22:38:00 | 27.0 | 11/22/2010 12:45:01 | 36.712 | 12/2/2010 19:01:01 | 34.110 |
| 4/8/2010 23:13:00 | 27.0 | 11/22/2010 13:05:01 | 37.273 | 12/2/2010 19:37:01 | 34.110 |
| 4/8/2010 23:48:00 | 27.0 | 11/22/2010 13:25:01 | 38.393 | 12/2/2010 20:13:01 | 34.110 |
| 4/9/2010 00:23:00 | 27.0 | 11/22/2010 13:45:01 | 38.269 | 12/2/2010 20:49:01 | 34.110 |
| 4/9/2010 00:58:00 | 27.0 | 11/22/2010 14:05:01 | 38.642 | 12/2/2010 21:25:01 | 34.608 |
| 4/9/2010 01:33:00 | 27.0 | 11/22/2010 14:25:01 | 37.335 | 12/2/2010 22:01:01 | 34.608 |
| 4/9/2010 02:08:00 | 27.0 | 11/22/2010 14:45:01 | 36.650 | 12/2/2010 22:37:01 | 34.608 |
| 4/9/2010 02:43:00 | 27.0 | 11/22/2010 15:05:01 | 35.841 | 12/2/2010 23:13:01 | 34.110 |
| 4/9/2010 03:18:00 | 27.0 | 11/22/2010 15:25:01 | 35.654 | 12/2/2010 23:49:01 | 34.110 |
| 4/9/2010 03:53:00 | 27.0 | 11/22/2010 15:45:01 | 35.342 | 12/3/2010 00:25:01 | 34.110 |
| 4/9/2010 04:28:00 | 27.0 | 11/22/2010 16:05:01 | 34.657 | 12/3/2010 01:01:01 | 34.110 |
| 4/9/2010 05:03:00 | 27.0 | 11/22/2010 16:25:01 | 34.532 | 12/3/2010 01:37:01 | 34.110 |
| 4/9/2010 05:38:00 | 27.0 | 11/22/2010 16:45:01 | 33.597 | 12/3/2010 02:13:01 | 34.110 |
| 4/9/2010 06:13:00 | 27.0 | 11/22/2010 17:05:01 | 32.475 | 12/3/2010 02:49:01 | 33.612 |
| 4/9/2010 06:48:00 | 27.0 | 11/22/2010 17:25:01 | 31.290 | 12/3/2010 03:25:01 | 33.612 |
| 4/9/2010 07:23:00 | 27.0 | 11/22/2010 17:45:01 | 30.417 | 12/3/2010 04:01:01 | 34.110 |
| 4/9/2010 07:58:00 | 27.0 | 11/22/2010 18:05:01 | 29.231 | 12/3/2010 04:37:01 | 34.608 |
| 4/9/2010 08:33:00 | 26.5 | 11/22/2010 18:25:01 | 28.233 | 12/3/2010 05:13:01 | 34.608 |
| 4/9/2010 09:08:00 | 26.5 | 11/22/2010 18:45:01 | 27.358 | 12/3/2010 05:49:01 | 34.110 |
| 4/9/2010 09:43:00 | 26.5 | 11/22/2010 19:05:01 | 26.671 | 12/3/2010 06:25:01 | 34.110 |
| 4/9/2010 10:18:00 | 26.5 | 11/22/2010 19:25:01 | 26.109 | 12/3/2010 07:01:01 | 34.110 |
| 4/9/2010 10:53:00 | 26.5 | 11/22/2010 19:45:01 | 25.484 | 12/3/2010 07:37:01 | 34.110 |

|                    |      |                     |        |                    |        |
|--------------------|------|---------------------|--------|--------------------|--------|
| 4/9/2010 11:28:00  | 26.5 | 11/22/2010 20:05:01 | 25.109 | 12/3/2010 08:13:01 | 33.113 |
| 4/9/2010 12:03:00  | 26.5 | 11/22/2010 20:25:01 | 25.234 | 12/3/2010 08:49:01 | 33.113 |
| 4/9/2010 12:38:00  | 26.5 | 11/22/2010 20:45:01 | 24.984 | 12/3/2010 09:25:01 | 33.612 |
| 4/9/2010 13:13:00  | 26.5 | 11/22/2010 21:05:01 | 25.609 | 12/3/2010 10:01:01 | 33.612 |
| 4/9/2010 13:48:00  | 26.5 | 11/22/2010 21:25:01 | 25.859 | 12/3/2010 10:37:01 | 34.110 |
| 4/9/2010 14:23:00  | 26.5 | 11/22/2010 21:45:01 | 25.797 | 12/3/2010 11:13:01 | 34.110 |
| 4/9/2010 14:58:00  | 26.5 | 11/22/2010 22:05:01 | 25.547 | 12/3/2010 11:49:01 | 33.612 |
| 4/9/2010 15:33:00  | 27.0 | 11/22/2010 22:25:01 | 25.047 | 12/3/2010 12:25:01 | 34.110 |
| 4/9/2010 16:08:00  | 27.0 | 11/22/2010 22:45:01 | 24.609 | 12/3/2010 13:01:01 | 34.608 |
| 4/9/2010 16:43:00  | 27.0 | 11/22/2010 23:05:01 | 24.297 | 12/3/2010 13:37:01 | 34.608 |
| 4/9/2010 17:18:00  | 27.0 | 11/22/2010 23:25:01 | 23.922 | 12/3/2010 14:13:01 | 34.110 |
| 4/9/2010 17:53:00  | 27.0 | 11/22/2010 23:45:01 | 23.547 | 12/3/2010 14:49:01 | 34.110 |
| 4/9/2010 18:28:00  | 27.0 | 11/23/2010 00:05:01 | 23.422 | 12/3/2010 15:25:01 | 34.110 |
| 4/9/2010 19:03:00  | 27.0 | 11/23/2010 00:25:01 | 23.422 | 12/3/2010 16:01:01 | 33.612 |
| 4/9/2010 19:38:00  | 27.0 | 11/23/2010 00:45:01 | 23.234 | 12/3/2010 16:37:01 | 33.612 |
| 4/9/2010 20:13:00  | 27.0 | 11/23/2010 01:05:01 | 22.921 | 12/3/2010 17:13:01 | 33.612 |
| 4/9/2010 20:48:00  | 27.0 | 11/23/2010 01:25:01 | 22.609 | 12/3/2010 17:49:01 | 33.612 |
| 4/9/2010 21:23:00  | 27.5 | 11/23/2010 01:45:01 | 22.546 | 12/3/2010 18:25:01 | 33.612 |
| 4/9/2010 21:58:00  | 27.5 | 11/23/2010 02:05:01 | 22.108 | 12/3/2010 19:01:01 | 34.110 |
| 4/9/2010 22:33:00  | 27.0 | 11/23/2010 02:25:01 | 21.796 | 12/3/2010 19:37:01 | 34.110 |
| 4/9/2010 23:08:00  | 27.0 | 11/23/2010 02:45:01 | 21.295 | 12/3/2010 20:13:01 | 34.608 |
| 4/9/2010 23:43:00  | 27.0 | 11/23/2010 03:05:01 | 20.857 | 12/3/2010 20:49:01 | 34.608 |
| 4/10/2010 00:18:00 | 27.0 | 11/23/2010 03:25:01 | 20.419 | 12/3/2010 21:25:01 | 34.110 |
| 4/10/2010 00:53:00 | 27.0 | 11/23/2010 03:45:01 | 19.981 | 12/3/2010 22:01:01 | 34.608 |
| 4/10/2010 01:28:00 | 27.0 | 11/23/2010 04:05:01 | 19.668 | 12/3/2010 22:37:01 | 34.608 |
| 4/10/2010 02:03:00 | 27.0 | 11/23/2010 04:25:01 | 19.480 | 12/3/2010 23:13:01 | 34.608 |
| 4/10/2010 02:38:00 | 27.0 | 11/23/2010 04:45:01 | 19.293 | 12/3/2010 23:49:01 | 34.608 |
| 4/10/2010 03:13:00 | 27.0 | 11/23/2010 05:05:01 | 19.042 | 12/4/2010 00:25:01 | 34.608 |
| 4/10/2010 03:48:00 | 27.0 | 11/23/2010 05:25:01 | 18.792 | 12/4/2010 01:01:01 | 34.608 |
| 4/10/2010 04:23:00 | 27.0 | 11/23/2010 05:45:01 | 19.105 | 12/4/2010 01:37:01 | 34.608 |
| 4/10/2010 04:58:00 | 27.0 | 11/23/2010 06:05:01 | 20.231 | 12/4/2010 02:13:01 | 34.608 |
| 4/10/2010 05:33:00 | 27.0 | 11/23/2010 06:25:01 | 21.921 | 12/4/2010 02:49:01 | 34.608 |
| 4/10/2010 06:08:00 | 27.0 | 11/23/2010 06:45:01 | 23.484 | 12/4/2010 03:25:01 | 34.110 |
| 4/10/2010 06:43:00 | 26.5 | 11/23/2010 07:05:01 | 25.797 | 12/4/2010 04:01:01 | 34.608 |
| 4/10/2010 07:18:00 | 26.5 | 11/23/2010 07:25:01 | 28.295 | 12/4/2010 04:37:01 | 34.110 |
| 4/10/2010 07:53:00 | 26.5 | 11/23/2010 07:45:01 | 29.668 | 12/4/2010 05:13:01 | 33.612 |
| 4/10/2010 08:28:00 | 26.5 | 11/23/2010 08:05:01 | 30.729 | 12/4/2010 05:49:01 | 33.612 |
| 4/10/2010 09:03:00 | 26.5 | 11/23/2010 08:25:01 | 31.166 | 12/4/2010 06:25:01 | 34.110 |
| 4/10/2010 09:38:00 | 26.5 | 11/23/2010 08:45:01 | 31.665 | 12/4/2010 07:01:01 | 34.608 |
| 4/10/2010 10:13:00 | 26.5 | 11/23/2010 09:05:01 | 33.036 | 12/4/2010 07:37:01 | 34.608 |
| 4/10/2010 10:48:00 | 26.5 | 11/23/2010 09:25:01 | 34.221 | 12/4/2010 08:13:01 | 35.107 |
| 4/10/2010 11:23:00 | 26.5 | 11/23/2010 09:45:01 | 35.404 | 12/4/2010 08:49:01 | 34.608 |
| 4/10/2010 11:58:00 | 26.5 | 11/23/2010 10:05:01 | 35.404 | 12/4/2010 09:25:01 | 34.608 |
| 4/10/2010 12:33:00 | 26.5 | 11/23/2010 10:25:01 | 35.716 | 12/4/2010 10:01:01 | 35.107 |
| 4/10/2010 13:08:00 | 26.5 | 11/23/2010 10:45:01 | 37.148 | 12/4/2010 10:37:01 | 35.107 |
| 4/10/2010 13:43:00 | 26.5 | 11/23/2010 11:05:01 | 37.086 | 12/4/2010 11:13:01 | 35.107 |
| 4/10/2010 14:18:00 | 26.5 | 11/23/2010 11:25:01 | 37.584 | 12/4/2010 11:49:01 | 34.608 |
| 4/10/2010 14:53:00 | 26.5 | 11/23/2010 11:45:01 | 38.269 | 12/4/2010 12:25:01 | 35.107 |
| 4/10/2010 15:28:00 | 26.5 | 11/23/2010 12:05:01 | 38.953 | 12/4/2010 13:01:01 | 35.107 |
| 4/10/2010 16:03:00 | 26.5 | 11/23/2010 12:25:01 | 38.456 | 12/4/2010 13:37:01 | 35.107 |

|                    |      |                     |        |                    |        |
|--------------------|------|---------------------|--------|--------------------|--------|
| 4/10/2010 16:38:00 | 26.5 | 11/23/2010 12:45:01 | 38.269 | 12/4/2010 14:13:01 | 35.107 |
| 4/10/2010 17:13:00 | 26.5 | 11/23/2010 13:05:01 | 39.202 | 12/4/2010 14:49:01 | 34.608 |
| 4/10/2010 17:48:00 | 27.0 | 11/23/2010 13:25:01 | 39.638 | 12/4/2010 15:25:01 | 34.608 |
| 4/10/2010 18:23:00 | 27.0 | 11/23/2010 13:45:01 | 39.513 | 12/4/2010 16:01:01 | 34.608 |
| 4/10/2010 18:58:00 | 27.0 | 11/23/2010 14:05:01 | 39.513 | 12/4/2010 16:37:01 | 34.110 |
| 4/10/2010 19:33:00 | 27.0 | 11/23/2010 14:25:01 | 39.140 | 12/4/2010 17:13:01 | 34.110 |
| 4/10/2010 20:08:00 | 27.0 | 11/23/2010 14:45:01 | 38.704 | 12/4/2010 17:49:01 | 33.612 |
| 4/10/2010 20:43:00 | 27.0 | 11/23/2010 15:05:01 | 36.712 | 12/4/2010 18:25:01 | 33.612 |
| 4/10/2010 21:18:00 | 27.0 | 11/23/2010 15:25:01 | 36.276 | 12/4/2010 19:01:01 | 33.612 |
| 4/10/2010 21:53:00 | 27.0 | 11/23/2010 15:45:01 | 36.152 | 12/4/2010 19:37:01 | 34.110 |
| 4/10/2010 22:28:00 | 27.0 | 11/23/2010 16:05:01 | 35.529 | 12/4/2010 20:13:01 | 34.110 |
| 4/10/2010 23:03:00 | 27.0 | 11/23/2010 16:25:01 | 34.968 | 12/4/2010 20:49:01 | 34.110 |
| 4/10/2010 23:38:00 | 27.0 | 11/23/2010 16:45:01 | 34.408 | 12/4/2010 21:25:01 | 34.110 |
| 4/11/2010 00:13:00 | 27.0 | 11/23/2010 17:05:01 | 33.597 | 12/4/2010 22:01:01 | 34.110 |
| 4/11/2010 00:48:00 | 27.0 | 11/23/2010 17:25:01 | 32.288 | 12/4/2010 22:37:01 | 34.110 |
| 4/11/2010 01:23:00 | 27.0 | 11/23/2010 17:45:01 | 31.041 | 12/4/2010 23:13:01 | 34.110 |
| 4/11/2010 01:58:00 | 27.0 | 11/23/2010 18:05:01 | 30.043 | 12/4/2010 23:49:01 | 34.110 |
| 4/11/2010 02:33:00 | 26.5 | 11/23/2010 18:25:01 | 28.794 | 12/5/2010 00:25:01 | 34.110 |
| 4/11/2010 03:08:00 | 26.5 | 11/23/2010 18:45:01 | 27.421 | 12/5/2010 01:01:01 | 34.110 |
| 4/11/2010 03:43:00 | 26.5 | 11/23/2010 19:05:01 | 26.546 | 12/5/2010 01:37:01 | 34.110 |
| 4/11/2010 04:18:00 | 27.0 | 11/23/2010 19:25:01 | 25.859 | 12/5/2010 02:13:01 | 34.608 |
| 4/11/2010 04:53:00 | 27.0 | 11/23/2010 19:45:01 | 25.484 | 12/5/2010 02:49:01 | 34.608 |
| 4/11/2010 05:28:00 | 27.0 | 11/23/2010 20:05:01 | 25.234 | 12/5/2010 03:25:01 | 34.608 |
| 4/11/2010 06:03:00 | 26.5 | 11/23/2010 20:25:01 | 26.609 | 12/5/2010 04:01:01 | 34.110 |
| 4/11/2010 06:38:00 | 26.5 | 11/23/2010 20:45:01 | 26.734 | 12/5/2010 04:37:01 | 34.110 |
| 4/11/2010 07:13:00 | 26.5 | 11/23/2010 21:05:01 | 26.234 | 12/5/2010 05:13:01 | 34.110 |
| 4/11/2010 07:48:00 | 26.5 | 11/23/2010 21:25:01 | 25.797 | 12/5/2010 05:49:01 | 34.110 |
| 4/11/2010 08:23:00 | 26.5 | 11/23/2010 21:45:01 | 25.359 | 12/5/2010 06:25:01 | 34.608 |
| 4/11/2010 08:58:00 | 26.5 | 11/23/2010 22:05:01 | 25.047 | 12/5/2010 07:01:01 | 34.608 |
| 4/11/2010 09:33:00 | 26.5 | 11/23/2010 22:25:01 | 24.609 | 12/5/2010 07:37:01 | 35.107 |
| 4/11/2010 10:08:00 | 26.5 | 11/23/2010 22:45:01 | 24.172 | 12/5/2010 08:13:01 | 34.608 |
| 4/11/2010 10:43:00 | 26.5 | 11/23/2010 23:05:01 | 23.797 | 12/5/2010 08:49:01 | 34.608 |
| 4/11/2010 11:18:00 | 26.5 | 11/23/2010 23:25:01 | 23.547 | 12/5/2010 09:25:01 | 34.608 |
| 4/11/2010 11:53:00 | 26.5 | 11/23/2010 23:45:01 | 23.297 | 12/5/2010 10:01:01 | 34.608 |
| 4/11/2010 12:28:00 | 26.5 | 11/24/2010 00:05:01 | 23.172 | 12/5/2010 10:37:01 | 35.107 |
| 4/11/2010 13:03:00 | 26.5 | 11/24/2010 00:25:01 | 23.109 | 12/5/2010 11:13:01 | 34.608 |
| 4/11/2010 13:38:00 | 26.5 | 11/24/2010 00:45:01 | 23.047 | 12/5/2010 11:49:01 | 35.107 |
| 4/11/2010 14:13:00 | 26.5 | 11/24/2010 01:05:01 | 23.047 | 12/5/2010 12:25:01 | 35.107 |
| 4/11/2010 14:48:00 | 26.5 | 11/24/2010 01:25:01 | 22.921 | 12/5/2010 13:01:01 | 35.605 |
| 4/11/2010 15:23:00 | 26.5 | 11/24/2010 01:45:01 | 22.671 | 12/5/2010 13:37:01 | 35.107 |
| 4/11/2010 15:58:00 | 26.5 | 11/24/2010 02:05:01 | 22.484 | 12/5/2010 14:13:01 | 35.605 |
| 4/11/2010 16:33:00 | 26.5 | 11/24/2010 02:25:01 | 22.296 | 12/5/2010 14:49:01 | 35.107 |
| 4/11/2010 17:08:00 | 26.5 | 11/24/2010 02:45:01 | 22.171 | 12/5/2010 15:25:01 | 37.099 |
| 4/11/2010 17:43:00 | 26.5 | 11/24/2010 03:05:01 | 21.983 | 12/5/2010 16:01:01 | 36.103 |
| 4/11/2010 18:18:00 | 26.5 | 11/24/2010 03:25:01 | 21.796 | 12/5/2010 16:37:01 | 35.605 |
| 4/11/2010 18:53:00 | 27.0 | 11/24/2010 03:45:01 | 21.608 | 12/5/2010 17:13:01 | 35.107 |
| 4/11/2010 19:28:00 | 26.5 | 11/24/2010 04:05:01 | 21.545 | 12/5/2010 17:49:01 | 35.107 |
| 4/11/2010 20:03:00 | 27.0 | 11/24/2010 04:25:01 | 21.358 | 12/5/2010 18:25:01 | 34.608 |
| 4/11/2010 20:38:00 | 27.0 | 11/24/2010 04:45:01 | 21.107 | 12/5/2010 19:01:01 | 34.110 |
| 4/11/2010 21:13:00 | 27.0 | 11/24/2010 05:05:01 | 20.920 | 12/5/2010 19:37:01 | 33.612 |

|                    |      |                     |        |                    |        |
|--------------------|------|---------------------|--------|--------------------|--------|
| 4/11/2010 21:48:00 | 27.0 | 11/24/2010 05:25:01 | 20.857 | 12/5/2010 20:13:01 | 34.110 |
| 4/11/2010 22:23:00 | 27.0 | 11/24/2010 05:45:01 | 21.045 | 12/5/2010 20:49:01 | 34.608 |
| 4/11/2010 22:58:00 | 27.0 | 11/24/2010 06:05:01 | 21.796 | 12/5/2010 21:25:01 | 34.608 |
| 4/11/2010 23:33:00 | 27.0 | 11/24/2010 06:25:01 | 22.921 | 12/5/2010 22:01:01 | 34.110 |
| 4/12/2010 00:08:00 | 27.0 | 11/24/2010 06:45:01 | 23.984 | 12/5/2010 22:37:01 | 34.110 |
| 4/12/2010 00:43:00 | 26.5 | 11/24/2010 07:05:01 | 26.047 | 12/5/2010 23:13:01 | 34.110 |
| 4/12/2010 01:18:00 | 26.5 | 11/24/2010 07:25:01 | 29.419 | 12/5/2010 23:49:01 | 34.110 |
| 4/12/2010 01:53:00 | 26.5 | 11/24/2010 07:45:01 | 30.854 | 12/6/2010 00:25:01 | 34.110 |
| 4/12/2010 02:28:00 | 26.0 | 11/24/2010 08:05:01 | 32.413 | 12/6/2010 01:01:01 | 34.608 |
| 4/12/2010 03:03:00 | 26.0 | 11/24/2010 08:25:01 | 32.725 | 12/6/2010 01:37:01 | 34.608 |
| 4/12/2010 03:38:00 | 26.0 | 11/24/2010 08:45:01 | 32.912 | 12/6/2010 02:13:01 | 34.608 |
| 4/12/2010 04:13:00 | 26.0 | 11/24/2010 09:05:01 | 34.034 | 12/6/2010 02:49:01 | 34.608 |
| 4/12/2010 04:48:00 | 26.0 | 11/24/2010 09:25:01 | 34.968 | 12/6/2010 03:25:01 | 34.608 |
| 4/12/2010 05:23:00 | 26.0 | 11/24/2010 09:45:01 | 36.526 | 12/6/2010 04:01:01 | 34.110 |
| 4/12/2010 05:58:00 | 26.0 | 11/24/2010 10:05:01 | 36.712 | 12/6/2010 04:37:01 | 34.608 |
| 4/12/2010 06:33:00 | 26.0 | 11/24/2010 10:25:01 | 36.899 | 12/6/2010 05:13:01 | 34.608 |
| 4/12/2010 07:08:00 | 26.0 | 11/24/2010 10:45:01 | 37.335 | 12/6/2010 05:49:01 | 34.608 |
| 4/12/2010 07:43:00 | 26.0 | 11/24/2010 11:05:01 | 36.526 | 12/6/2010 06:25:01 | 34.608 |
| 4/12/2010 08:18:00 | 26.0 | 11/24/2010 11:25:01 | 38.020 | 12/6/2010 07:01:01 | 34.608 |
| 4/12/2010 08:53:00 | 26.0 | 11/24/2010 11:45:01 | 37.522 | 12/6/2010 07:37:01 | 33.612 |
| 4/12/2010 09:28:00 | 26.0 | 11/24/2010 12:05:01 | 36.526 | 12/6/2010 08:13:01 | 34.110 |
| 4/12/2010 10:03:00 | 26.0 | 11/24/2010 12:25:01 | 36.962 | 12/6/2010 08:49:01 | 34.608 |
| 4/12/2010 10:38:00 | 26.0 | 11/24/2010 12:45:01 | 37.958 | 12/6/2010 09:25:01 | 34.608 |
| 4/12/2010 11:13:00 | 26.0 | 11/24/2010 13:05:01 | 39.451 | 12/6/2010 10:01:01 | 34.608 |
| 4/12/2010 11:48:00 | 26.0 | 11/24/2010 13:25:01 | 37.148 | 12/6/2010 10:37:01 | 34.110 |
| 4/12/2010 12:23:00 | 26.0 | 11/24/2010 13:45:01 | 38.767 | 12/6/2010 11:13:01 | 34.110 |
| 4/12/2010 12:58:00 | 26.0 | 11/24/2010 14:05:01 | 39.700 | 12/6/2010 11:49:01 | 34.110 |
| 4/12/2010 13:33:00 | 26.0 | 11/24/2010 14:25:01 | 39.638 | 12/6/2010 12:25:01 | 34.608 |
| 4/12/2010 14:08:00 | 26.5 | 11/24/2010 14:45:01 | 39.078 | 12/6/2010 13:01:01 | 34.608 |
| 4/12/2010 14:43:00 | 26.5 | 11/24/2010 15:05:01 | 37.522 | 12/6/2010 13:37:01 | 34.608 |
| 4/12/2010 15:18:00 | 26.5 | 11/24/2010 15:25:01 | 36.027 | 12/6/2010 14:13:01 | 34.608 |
| 4/12/2010 15:53:00 | 26.5 | 11/24/2010 15:45:01 | 35.965 | 12/6/2010 14:49:01 | 34.608 |
| 4/12/2010 16:28:00 | 26.5 | 11/24/2010 16:05:01 | 36.401 | 12/6/2010 15:25:01 | 34.608 |
| 4/12/2010 17:03:00 | 26.5 | 11/24/2010 16:25:01 | 35.529 | 12/6/2010 16:01:01 | 34.608 |
| 4/12/2010 17:38:00 | 26.5 | 11/24/2010 16:45:01 | 34.719 | 12/6/2010 16:37:01 | 34.608 |
| 4/12/2010 18:13:00 | 26.5 | 11/24/2010 17:05:01 | 33.784 | 12/6/2010 17:13:01 | 34.110 |
| 4/12/2010 18:48:00 | 26.5 | 11/24/2010 17:25:01 | 33.223 | 12/6/2010 17:49:01 | 33.612 |
| 4/12/2010 19:23:00 | 26.5 | 11/24/2010 17:45:01 | 32.288 | 12/6/2010 18:25:01 | 34.110 |
| 4/12/2010 19:58:00 | 26.5 | 11/24/2010 18:05:01 | 31.103 | 12/6/2010 19:01:01 | 34.110 |
| 4/12/2010 20:33:00 | 26.5 | 11/24/2010 18:25:01 | 29.481 | 12/6/2010 19:37:01 | 34.110 |
| 4/12/2010 21:08:00 | 26.5 | 11/24/2010 18:45:01 | 28.919 | 12/6/2010 20:13:01 | 34.608 |
| 4/12/2010 21:43:00 | 26.5 | 11/24/2010 19:05:01 | 28.670 | 12/6/2010 20:49:01 | 34.608 |
| 4/12/2010 22:18:00 | 26.5 | 11/24/2010 19:25:01 | 28.170 | 12/6/2010 21:25:01 | 34.608 |
| 4/12/2010 22:53:00 | 26.5 | 11/24/2010 19:45:01 | 27.546 | 12/6/2010 22:01:01 | 34.608 |
| 4/12/2010 23:28:00 | 26.5 | 11/24/2010 20:05:01 | 26.859 | 12/6/2010 22:37:01 | 34.608 |
| 4/13/2010 00:03:00 | 26.5 | 11/24/2010 20:25:01 | 26.484 | 12/6/2010 23:13:01 | 34.608 |
| 4/13/2010 00:38:00 | 26.5 | 11/24/2010 20:45:01 | 25.984 | 12/6/2010 23:49:01 | 34.608 |
| 4/13/2010 01:13:00 | 26.5 | 11/24/2010 21:05:01 | 25.297 | 12/7/2010 00:25:01 | 34.608 |
| 4/13/2010 01:48:00 | 26.5 | 11/24/2010 21:25:01 | 24.922 | 12/7/2010 01:01:01 | 34.608 |
| 4/13/2010 02:23:00 | 26.5 | 11/24/2010 21:45:01 | 24.609 | 12/7/2010 01:37:01 | 34.608 |

|                    |      |                     |        |                    |        |
|--------------------|------|---------------------|--------|--------------------|--------|
| 4/13/2010 02:58:00 | 26.5 | 11/24/2010 22:05:01 | 24.359 | 12/7/2010 02:13:01 | 34.608 |
| 4/13/2010 03:33:00 | 26.5 | 11/24/2010 22:25:01 | 24.484 | 12/7/2010 02:49:01 | 34.608 |
| 4/13/2010 04:08:00 | 26.5 | 11/24/2010 22:45:01 | 24.609 | 12/7/2010 03:25:01 | 34.608 |
| 4/13/2010 04:43:00 | 26.5 | 11/24/2010 23:05:01 | 24.984 | 12/7/2010 04:01:01 | 34.608 |
| 4/13/2010 05:18:00 | 26.5 | 11/24/2010 23:25:01 | 24.859 | 12/7/2010 04:37:01 | 34.608 |
| 4/13/2010 05:53:00 | 26.5 | 11/24/2010 23:45:01 | 24.672 | 12/7/2010 05:13:01 | 34.608 |
| 4/13/2010 06:28:00 | 26.5 | 11/25/2010 00:05:01 | 24.484 | 12/7/2010 05:49:01 | 34.608 |
| 4/13/2010 07:03:00 | 26.5 | 11/25/2010 00:25:01 | 24.234 | 12/7/2010 06:25:01 | 34.608 |
| 4/13/2010 07:38:00 | 26.5 | 11/25/2010 00:45:01 | 23.859 | 12/7/2010 07:01:01 | 34.608 |
| 4/13/2010 08:13:00 | 26.5 | 11/25/2010 01:05:01 | 23.484 | 12/7/2010 07:37:01 | 34.608 |
| 4/13/2010 08:48:00 | 26.5 | 11/25/2010 01:25:01 | 23.422 | 12/7/2010 08:13:01 | 34.110 |
| 4/13/2010 09:23:00 | 26.5 | 11/25/2010 01:45:01 | 23.359 | 12/7/2010 08:49:01 | 34.110 |
| 4/13/2010 09:58:00 | 26.0 | 11/25/2010 02:05:01 | 23.109 | 12/7/2010 09:25:01 | 34.608 |
| 4/13/2010 10:33:00 | 26.0 | 11/25/2010 02:25:01 | 23.047 | 12/7/2010 10:01:01 | 34.608 |
| 4/13/2010 11:08:00 | 26.0 | 11/25/2010 02:45:01 | 22.859 | 12/7/2010 10:37:01 | 34.608 |
| 4/13/2010 11:43:00 | 26.5 | 11/25/2010 03:05:01 | 22.984 | 12/7/2010 11:13:01 | 34.608 |
| 4/13/2010 12:18:00 | 27.0 | 11/25/2010 03:25:01 | 23.047 | 12/7/2010 11:49:01 | 34.608 |
| 4/13/2010 12:53:00 | 27.0 | 11/25/2010 03:45:01 | 23.234 | 12/7/2010 12:25:01 | 34.608 |
| 4/13/2010 13:28:00 | 26.5 | 11/25/2010 04:05:01 | 23.547 | 12/7/2010 13:01:01 | 34.110 |
| 4/13/2010 14:03:00 | 26.5 | 11/25/2010 04:25:01 | 23.547 | 12/7/2010 13:37:01 | 34.110 |
| 4/13/2010 14:38:00 | 26.5 | 11/25/2010 04:45:01 | 23.734 | 12/7/2010 14:13:01 | 34.110 |
| 4/13/2010 15:13:00 | 26.5 | 11/25/2010 05:05:01 | 23.859 | 12/7/2010 14:49:01 | 34.608 |
| 4/13/2010 15:48:00 | 26.5 | 11/25/2010 05:25:01 | 23.922 | 12/7/2010 15:25:01 | 34.608 |
| 4/13/2010 16:23:00 | 26.5 | 11/25/2010 05:45:01 | 23.797 | 12/7/2010 16:01:01 | 34.110 |
| 4/13/2010 16:58:00 | 26.5 | 11/25/2010 06:05:01 | 23.797 | 12/7/2010 16:37:01 | 34.110 |
| 4/13/2010 17:33:00 | 26.5 | 11/25/2010 06:25:01 | 23.797 | 12/7/2010 17:13:01 | 33.612 |
| 4/13/2010 18:08:00 | 26.5 | 11/25/2010 06:45:01 | 23.734 | 12/7/2010 17:49:01 | 33.612 |
| 4/13/2010 18:43:00 | 26.5 | 11/25/2010 07:05:01 | 23.609 | 12/7/2010 18:25:01 | 34.110 |
| 4/13/2010 19:18:00 | 26.5 | 11/25/2010 07:25:01 | 23.609 | 12/7/2010 19:01:01 | 34.608 |
| 4/13/2010 19:53:00 | 26.5 | 11/25/2010 07:45:01 | 23.672 | 12/7/2010 19:37:01 | 34.608 |
| 4/13/2010 20:28:00 | 26.5 | 11/25/2010 08:05:01 | 23.859 | 12/7/2010 20:13:01 | 35.107 |
| 4/13/2010 21:03:00 | 26.5 | 11/25/2010 08:25:01 | 24.422 | 12/7/2010 20:49:01 | 34.608 |
| 4/13/2010 21:38:00 | 26.5 | 11/25/2010 08:45:01 | 25.547 | 12/7/2010 21:25:01 | 35.107 |
| 4/13/2010 22:13:00 | 26.5 | 11/25/2010 09:05:01 | 26.359 | 12/7/2010 22:01:01 | 34.608 |
| 4/13/2010 22:48:00 | 26.5 | 11/25/2010 09:25:01 | 27.046 | 12/7/2010 22:37:01 | 35.107 |
| 4/13/2010 23:23:00 | 26.5 | 11/25/2010 09:45:01 | 28.045 | 12/7/2010 23:13:01 | 34.608 |
| 4/13/2010 23:58:00 | 26.5 | 11/25/2010 10:05:01 | 29.231 | 12/7/2010 23:49:01 | 34.608 |
| 4/14/2010 00:33:00 | 26.5 | 11/25/2010 10:25:01 | 30.105 | 12/8/2010 00:25:01 | 35.107 |
| 4/14/2010 01:08:00 | 26.5 | 11/25/2010 10:45:01 | 30.542 | 12/8/2010 01:01:01 | 35.107 |
| 4/14/2010 01:43:00 | 26.5 | 11/25/2010 11:05:01 | 31.540 | 12/8/2010 01:37:01 | 35.107 |
| 4/14/2010 02:18:00 | 26.5 | 11/25/2010 11:25:01 | 32.288 | 12/8/2010 02:13:01 | 34.608 |
| 4/14/2010 02:53:00 | 26.5 | 11/25/2010 11:45:01 | 32.413 | 12/8/2010 02:49:01 | 35.107 |
| 4/14/2010 03:28:00 | 26.5 | 11/25/2010 12:05:01 | 32.163 | 12/8/2010 03:25:01 | 35.107 |
| 4/14/2010 04:03:00 | 26.5 | 11/25/2010 12:25:01 | 32.725 | 12/8/2010 04:01:01 | 35.107 |
| 4/14/2010 04:38:00 | 26.0 | 11/25/2010 12:45:01 | 33.660 | 12/8/2010 04:37:01 | 35.107 |
| 4/14/2010 05:13:00 | 26.0 | 11/25/2010 13:05:01 | 33.722 | 12/8/2010 05:13:01 | 35.605 |
| 4/14/2010 05:48:00 | 26.0 | 11/25/2010 13:25:01 | 33.099 | 12/8/2010 05:49:01 | 35.107 |
| 4/14/2010 06:23:00 | 26.0 | 11/25/2010 13:45:01 | 32.600 | 12/8/2010 06:25:01 | 35.107 |
| 4/14/2010 06:58:00 | 26.0 | 11/25/2010 14:05:01 | 32.413 | 12/8/2010 07:01:01 | 35.107 |
| 4/14/2010 07:33:00 | 26.0 | 11/25/2010 14:25:01 | 31.852 | 12/8/2010 07:37:01 | 34.608 |

|                    |      |                     |        |                    |        |
|--------------------|------|---------------------|--------|--------------------|--------|
| 4/14/2010 08:08:00 | 26.0 | 11/25/2010 14:45:01 | 31.477 | 12/8/2010 08:13:01 | 34.608 |
| 4/14/2010 08:43:00 | 26.0 | 11/25/2010 15:05:01 | 31.290 | 12/8/2010 08:49:01 | 34.608 |
| 4/14/2010 09:18:00 | 26.0 | 11/25/2010 15:25:01 | 30.916 | 12/8/2010 09:25:01 | 35.107 |
| 4/14/2010 09:53:00 | 26.0 | 11/25/2010 15:45:01 | 30.667 | 12/8/2010 10:01:01 | 34.608 |
| 4/14/2010 10:28:00 | 26.0 | 11/25/2010 16:05:01 | 30.479 | 12/8/2010 10:37:01 | 35.107 |
| 4/14/2010 11:03:00 | 26.0 | 11/25/2010 16:25:01 | 30.230 | 12/8/2010 11:13:01 | 35.107 |
| 4/14/2010 11:38:00 | 26.0 | 11/25/2010 16:45:01 | 30.043 | 12/8/2010 11:49:01 | 35.107 |
| 4/14/2010 12:13:00 | 26.0 | 11/25/2010 17:05:01 | 29.668 | 12/8/2010 12:25:01 | 35.605 |
| 4/14/2010 12:48:00 | 26.0 | 11/25/2010 17:25:01 | 29.294 | 12/8/2010 13:01:01 | 35.605 |
| 4/14/2010 13:23:00 | 26.0 | 11/25/2010 17:45:01 | 28.670 | 12/8/2010 13:37:01 | 35.605 |
| 4/14/2010 13:58:00 | 26.0 | 11/25/2010 18:05:01 | 28.045 | 12/8/2010 14:13:01 | 35.605 |
| 4/14/2010 14:33:00 | 26.0 | 11/25/2010 18:25:01 | 27.046 | 12/8/2010 14:49:01 | 35.107 |
| 4/14/2010 15:08:00 | 26.0 | 11/25/2010 18:45:01 | 26.172 | 12/8/2010 15:25:01 | 35.107 |
| 4/14/2010 15:43:00 | 26.0 | 11/25/2010 19:05:01 | 25.672 | 12/8/2010 16:01:01 | 35.107 |
| 4/14/2010 16:18:00 | 26.0 | 11/25/2010 19:25:01 | 25.672 | 12/8/2010 16:37:01 | 35.107 |
| 4/14/2010 16:53:00 | 26.5 | 11/25/2010 19:45:01 | 25.422 | 12/8/2010 17:13:01 | 35.107 |
| 4/14/2010 17:28:00 | 26.5 | 11/25/2010 20:05:01 | 25.297 | 12/8/2010 17:49:01 | 35.107 |
| 4/14/2010 18:03:00 | 26.5 | 11/25/2010 20:25:01 | 25.109 | 12/8/2010 18:25:01 | 34.608 |
| 4/14/2010 18:38:00 | 26.5 | 11/25/2010 20:45:01 | 24.859 | 12/8/2010 19:01:01 | 34.608 |
| 4/14/2010 19:13:00 | 26.5 | 11/25/2010 21:05:01 | 24.422 | 12/8/2010 19:37:01 | 34.608 |
| 4/14/2010 19:48:00 | 26.5 | 11/25/2010 21:25:01 | 24.047 | 12/8/2010 20:13:01 | 34.608 |
| 4/14/2010 20:23:00 | 26.5 | 11/25/2010 21:45:01 | 23.547 | 12/8/2010 20:49:01 | 35.107 |
| 4/14/2010 20:58:00 | 26.5 | 11/25/2010 22:05:01 | 23.422 | 12/8/2010 21:25:01 | 35.107 |
| 4/14/2010 21:33:00 | 26.5 | 11/25/2010 22:25:01 | 23.297 | 12/8/2010 22:01:01 | 35.107 |
| 4/14/2010 22:08:00 | 26.5 | 11/25/2010 22:45:01 | 23.172 | 12/8/2010 22:37:01 | 35.107 |
| 4/14/2010 22:43:00 | 26.5 | 11/25/2010 23:05:01 | 22.859 | 12/8/2010 23:13:01 | 35.107 |
| 4/14/2010 23:18:00 | 26.5 | 11/25/2010 23:25:01 | 22.421 | 12/8/2010 23:49:01 | 34.608 |
| 4/14/2010 23:53:00 | 26.5 | 11/25/2010 23:45:01 | 22.108 | 12/9/2010 00:25:01 | 34.608 |
| 4/15/2010 00:28:00 | 26.5 | 11/26/2010 00:05:01 | 22.359 | 12/9/2010 01:01:01 | 34.608 |
| 4/15/2010 01:03:00 | 26.5 | 11/26/2010 00:25:01 | 22.421 | 12/9/2010 01:37:01 | 35.107 |
| 4/15/2010 01:38:00 | 26.5 | 11/26/2010 00:45:01 | 22.546 | 12/9/2010 02:13:01 | 35.107 |
| 4/15/2010 02:13:00 | 26.5 | 11/26/2010 01:05:01 | 22.609 | 12/9/2010 02:49:01 | 35.107 |
| 4/15/2010 02:48:00 | 26.5 | 11/26/2010 01:25:01 | 22.609 | 12/9/2010 03:25:01 | 35.107 |
| 4/15/2010 03:23:00 | 26.5 | 11/26/2010 01:45:01 | 22.484 | 12/9/2010 04:01:01 | 35.107 |
| 4/15/2010 03:58:00 | 26.5 | 11/26/2010 02:05:01 | 22.359 | 12/9/2010 04:37:01 | 35.107 |
| 4/15/2010 04:33:00 | 26.5 | 11/26/2010 02:25:01 | 22.921 | 12/9/2010 05:13:01 | 35.107 |
| 4/15/2010 05:08:00 | 26.5 | 11/26/2010 02:45:01 | 23.297 | 12/9/2010 05:49:01 | 34.608 |
| 4/15/2010 05:43:00 | 26.5 | 11/26/2010 03:05:01 | 23.422 | 12/9/2010 06:25:01 | 34.608 |
| 4/15/2010 06:18:00 | 26.5 | 11/26/2010 03:25:01 | 23.359 | 12/9/2010 07:01:01 | 34.110 |
| 4/15/2010 06:53:00 | 26.5 | 11/26/2010 03:45:01 | 23.359 | 12/9/2010 07:37:01 | 34.608 |
| 4/15/2010 07:28:00 | 26.5 | 11/26/2010 04:05:01 | 23.359 | 12/9/2010 08:13:01 | 34.608 |
| 4/15/2010 08:03:00 | 26.5 | 11/26/2010 04:25:01 | 23.484 | 12/9/2010 08:49:01 | 35.107 |
| 4/15/2010 08:38:00 | 26.5 | 11/26/2010 04:45:01 | 23.609 | 12/9/2010 09:25:01 | 34.608 |
| 4/15/2010 09:13:00 | 26.5 | 11/26/2010 05:05:01 | 23.547 | 12/9/2010 10:01:01 | 34.608 |
| 4/15/2010 09:48:00 | 26.0 | 11/26/2010 05:25:01 | 23.297 | 12/9/2010 10:37:01 | 34.608 |
| 4/15/2010 10:23:00 | 26.0 | 11/26/2010 05:45:01 | 23.297 | 12/9/2010 11:13:01 | 34.608 |
| 4/15/2010 10:58:00 | 26.0 | 11/26/2010 06:05:01 | 23.234 | 12/9/2010 11:49:01 | 35.107 |
| 4/15/2010 11:33:00 | 26.0 | 11/26/2010 06:25:01 | 22.984 | 12/9/2010 12:25:01 | 35.107 |
| 4/15/2010 12:08:00 | 26.0 | 11/26/2010 06:45:01 | 21.733 | 12/9/2010 13:01:01 | 35.107 |
| 4/15/2010 12:43:00 | 26.0 | 11/26/2010 07:05:01 | 21.107 | 12/9/2010 13:37:01 | 35.107 |

|                    |      |                     |        |                     |        |
|--------------------|------|---------------------|--------|---------------------|--------|
| 4/15/2010 13:18:00 | 26.0 | 11/26/2010 07:25:01 | 21.358 | 12/9/2010 14:13:01  | 35.107 |
| 4/15/2010 13:53:00 | 26.0 | 11/26/2010 07:45:01 | 21.796 | 12/9/2010 14:49:01  | 35.107 |
| 4/15/2010 14:28:00 | 26.0 | 11/26/2010 08:05:01 | 22.108 | 12/9/2010 15:25:01  | 34.608 |
| 4/15/2010 15:03:00 | 26.0 | 11/26/2010 08:25:01 | 22.859 | 12/9/2010 16:01:01  | 34.608 |
| 4/15/2010 15:38:00 | 26.0 | 11/26/2010 08:45:01 | 22.984 | 12/9/2010 16:37:01  | 35.107 |
| 4/15/2010 16:13:00 | 26.0 | 11/26/2010 09:05:01 | 23.984 | 12/9/2010 17:13:01  | 34.608 |
| 4/15/2010 16:48:00 | 26.5 | 11/26/2010 09:25:01 | 25.359 | 12/9/2010 17:49:01  | 34.110 |
| 4/15/2010 17:23:00 | 26.5 | 11/26/2010 09:45:01 | 26.234 | 12/9/2010 18:25:01  | 33.612 |
| 4/15/2010 17:58:00 | 26.5 | 11/26/2010 10:05:01 | 27.046 | 12/9/2010 19:01:01  | 34.608 |
| 4/15/2010 18:33:00 | 26.5 | 11/26/2010 10:25:01 | 30.791 | 12/9/2010 19:37:01  | 34.608 |
| 4/15/2010 19:08:00 | 26.5 | 11/26/2010 10:45:01 | 32.351 | 12/9/2010 20:13:01  | 35.107 |
| 4/15/2010 19:43:00 | 26.5 | 11/26/2010 11:05:01 | 33.473 | 12/9/2010 20:49:01  | 35.107 |
| 4/15/2010 20:18:00 | 26.5 | 11/26/2010 11:25:01 | 34.657 | 12/9/2010 21:25:01  | 35.107 |
| 4/15/2010 20:53:00 | 26.5 | 11/26/2010 11:45:01 | 33.223 | 12/9/2010 22:01:01  | 34.608 |
| 4/15/2010 21:28:00 | 26.5 | 11/26/2010 12:05:01 | 32.662 | 12/9/2010 22:37:01  | 34.608 |
| 4/15/2010 22:03:00 | 26.5 | 11/26/2010 12:25:01 | 31.540 | 12/9/2010 23:13:01  | 34.608 |
| 4/15/2010 22:38:00 | 26.5 | 11/26/2010 12:45:01 | 32.163 | 12/9/2010 23:49:01  | 34.608 |
| 4/15/2010 23:13:00 | 26.5 | 11/26/2010 13:05:01 | 36.152 | 12/10/2010 00:25:01 | 35.107 |
| 4/15/2010 23:48:00 | 26.5 | 11/26/2010 13:25:01 | 33.971 | 12/10/2010 01:01:01 | 35.107 |
| 4/16/2010 00:23:00 | 26.5 | 11/26/2010 13:45:01 | 32.475 | 12/10/2010 01:37:01 | 35.107 |
| 4/16/2010 00:58:00 | 26.5 | 11/26/2010 14:05:01 | 32.101 | 12/10/2010 02:13:01 | 35.107 |
| 4/16/2010 01:33:00 | 26.0 | 11/26/2010 14:25:01 | 33.722 | 12/10/2010 02:49:01 | 35.107 |
| 4/16/2010 02:08:00 | 26.0 | 11/26/2010 14:45:01 | 35.155 | 12/10/2010 03:25:01 | 35.107 |
| 4/16/2010 02:43:00 | 26.0 | 11/26/2010 15:05:01 | 34.781 | 12/10/2010 04:01:01 | 34.608 |
| 4/16/2010 03:18:00 | 26.0 | 11/26/2010 15:25:01 | 34.283 | 12/10/2010 04:37:01 | 34.608 |
| 4/16/2010 03:53:00 | 26.0 | 11/26/2010 15:45:01 | 33.473 | 12/10/2010 05:13:01 | 34.608 |
| 4/16/2010 04:28:00 | 26.0 | 11/26/2010 16:05:01 | 33.410 | 12/10/2010 05:49:01 | 34.110 |
| 4/16/2010 05:03:00 | 26.0 | 11/26/2010 16:25:01 | 32.787 | 12/10/2010 06:25:01 | 34.110 |
| 4/16/2010 05:38:00 | 26.0 | 11/26/2010 16:45:01 | 32.101 | 12/10/2010 07:01:01 | 34.110 |
| 4/16/2010 06:13:00 | 26.0 | 11/26/2010 17:05:01 | 31.290 | 12/10/2010 07:37:01 | 33.612 |
| 4/16/2010 06:48:00 | 26.0 | 11/26/2010 17:25:01 | 30.417 | 12/10/2010 08:13:01 | 33.612 |
| 4/16/2010 07:23:00 | 26.0 | 11/26/2010 17:45:01 | 29.481 | 12/10/2010 08:49:01 | 33.612 |
| 4/16/2010 07:58:00 | 26.0 | 11/26/2010 18:05:01 | 28.482 | 12/10/2010 09:25:01 | 33.612 |
| 4/16/2010 08:33:00 | 26.0 | 11/26/2010 18:25:01 | 27.608 | 12/10/2010 10:01:01 | 33.612 |
| 4/16/2010 09:08:00 | 26.0 | 11/26/2010 18:45:01 | 26.984 | 12/10/2010 10:37:01 | 33.612 |
| 4/16/2010 09:43:00 | 26.0 | 11/26/2010 19:05:01 | 26.546 | 12/10/2010 11:13:01 | 33.612 |
| 4/16/2010 10:18:00 | 26.0 | 11/26/2010 19:25:01 | 25.984 | 12/10/2010 11:49:01 | 33.612 |
| 4/16/2010 10:53:00 | 26.0 | 11/26/2010 19:45:01 | 25.547 | 12/10/2010 12:25:01 | 33.612 |
| 4/16/2010 11:28:00 | 26.0 | 11/26/2010 20:05:01 | 25.172 | 12/10/2010 13:01:01 | 34.608 |
| 4/16/2010 12:03:00 | 26.0 | 11/26/2010 20:25:01 | 24.797 | 12/10/2010 13:37:01 | 34.608 |
| 4/16/2010 12:38:00 | 26.0 | 11/26/2010 20:45:01 | 24.297 | 12/10/2010 14:13:01 | 34.110 |
| 4/16/2010 13:13:00 | 26.0 | 11/26/2010 21:05:01 | 23.922 | 12/10/2010 14:49:01 | 34.110 |
| 4/16/2010 13:48:00 | 26.0 | 11/26/2010 21:25:01 | 23.672 | 12/10/2010 15:25:01 | 34.110 |
| 4/16/2010 14:23:00 | 26.0 | 11/26/2010 21:45:01 | 23.547 | 12/10/2010 16:01:01 | 34.110 |
| 4/16/2010 14:58:00 | 26.0 | 11/26/2010 22:05:01 | 23.297 | 12/10/2010 16:37:01 | 34.110 |
| 4/16/2010 15:33:00 | 26.0 | 11/26/2010 22:25:01 | 23.047 | 12/10/2010 17:13:01 | 33.612 |
| 4/16/2010 16:08:00 | 26.0 | 11/26/2010 22:45:01 | 22.734 | 12/10/2010 17:49:01 | 34.110 |
| 4/16/2010 16:43:00 | 26.0 | 11/26/2010 23:05:01 | 22.421 | 12/10/2010 18:25:01 | 34.110 |
| 4/16/2010 17:18:00 | 26.0 | 11/26/2010 23:25:01 | 22.171 | 12/10/2010 19:01:01 | 34.110 |
| 4/16/2010 17:53:00 | 26.0 | 11/26/2010 23:45:01 | 22.046 | 12/10/2010 19:37:01 | 34.608 |

|                    |      |                     |        |                     |        |
|--------------------|------|---------------------|--------|---------------------|--------|
| 4/16/2010 18:28:00 | 26.0 | 11/27/2010 00:05:01 | 21.921 | 12/10/2010 20:13:01 | 34.608 |
| 4/16/2010 19:03:00 | 26.0 | 11/27/2010 00:25:01 | 21.796 | 12/10/2010 20:49:01 | 34.608 |
| 4/16/2010 19:38:00 | 26.0 | 11/27/2010 00:45:01 | 21.796 | 12/10/2010 21:25:01 | 34.608 |
| 4/16/2010 20:13:00 | 26.0 | 11/27/2010 01:05:01 | 22.108 | 12/10/2010 22:01:01 | 34.608 |
| 4/16/2010 20:48:00 | 26.0 | 11/27/2010 01:25:01 | 22.296 | 12/10/2010 22:37:01 | 35.107 |
| 4/16/2010 21:23:00 | 26.0 | 11/27/2010 01:45:01 | 22.171 | 12/10/2010 23:13:01 | 34.608 |
| 4/16/2010 21:58:00 | 26.0 | 11/27/2010 02:05:01 | 22.108 | 12/10/2010 23:49:01 | 34.608 |
| 4/16/2010 22:33:00 | 26.0 | 11/27/2010 02:25:01 | 21.983 | 12/11/2010 00:25:01 | 34.608 |
| 4/16/2010 23:08:00 | 26.5 | 11/27/2010 02:45:01 | 21.796 | 12/11/2010 01:01:01 | 34.608 |
| 4/16/2010 23:43:00 | 26.5 | 11/27/2010 03:05:01 | 21.608 | 12/11/2010 01:37:01 | 35.107 |
| 4/17/2010 00:18:00 | 26.5 | 11/27/2010 03:25:01 | 21.545 | 12/11/2010 02:13:01 | 35.107 |
| 4/17/2010 00:53:00 | 26.0 | 11/27/2010 03:45:01 | 21.358 | 12/11/2010 02:49:01 | 34.608 |
| 4/17/2010 01:28:00 | 26.0 | 11/27/2010 04:05:01 | 21.233 | 12/11/2010 03:25:01 | 34.608 |
| 4/17/2010 02:03:00 | 26.0 | 11/27/2010 04:25:01 | 21.107 | 12/11/2010 04:01:01 | 35.107 |
| 4/17/2010 02:38:00 | 26.0 | 11/27/2010 04:45:01 | 21.170 | 12/11/2010 04:37:01 | 35.107 |
| 4/17/2010 03:13:00 | 26.0 | 11/27/2010 05:05:01 | 21.483 | 12/11/2010 05:13:01 | 35.107 |
| 4/17/2010 03:48:00 | 26.0 | 11/27/2010 05:25:01 | 21.671 | 12/11/2010 05:49:01 | 34.608 |
| 4/17/2010 04:23:00 | 26.0 | 11/27/2010 05:45:01 | 22.046 | 12/11/2010 06:25:01 | 34.608 |
| 4/17/2010 04:58:00 | 26.0 | 11/27/2010 06:05:01 | 22.421 | 12/11/2010 07:01:01 | 34.608 |
| 4/17/2010 05:33:00 | 26.0 | 11/27/2010 06:25:01 | 23.797 | 12/11/2010 07:37:01 | 34.608 |
| 4/17/2010 06:08:00 | 26.0 | 11/27/2010 06:45:01 | 24.359 | 12/11/2010 08:13:01 | 34.608 |
| 4/17/2010 06:43:00 | 26.0 | 11/27/2010 07:05:01 | 24.547 | 12/11/2010 08:49:01 | 34.110 |
| 4/17/2010 07:18:00 | 26.0 | 11/27/2010 07:25:01 | 24.422 | 12/11/2010 09:25:01 | 34.110 |
| 4/17/2010 07:53:00 | 26.0 | 11/27/2010 07:45:01 | 24.484 | 12/11/2010 10:01:01 | 34.110 |
| 4/17/2010 08:28:00 | 26.0 | 11/27/2010 08:05:01 | 25.484 | 12/11/2010 10:37:01 | 34.110 |
| 4/17/2010 09:03:00 | 26.0 | 11/27/2010 08:25:01 | 28.295 | 12/11/2010 11:13:01 | 34.110 |
| 4/17/2010 09:38:00 | 26.0 | 11/27/2010 08:45:01 | 30.167 | 12/11/2010 11:49:01 | 35.107 |
| 4/17/2010 10:13:00 | 26.0 | 11/27/2010 09:05:01 | 30.479 | 12/11/2010 12:25:01 | 35.605 |
| 4/17/2010 10:48:00 | 26.0 | 11/27/2010 09:25:01 | 29.731 | 12/11/2010 13:01:01 | 36.103 |
| 4/17/2010 11:23:00 | 26.0 | 11/27/2010 09:45:01 | 32.351 | 12/11/2010 13:37:01 | 35.107 |
| 4/17/2010 11:58:00 | 26.0 | 11/27/2010 10:05:01 | 31.477 | 12/11/2010 14:13:01 | 35.605 |
| 4/17/2010 12:33:00 | 26.0 | 11/27/2010 10:25:01 | 34.221 | 12/11/2010 14:49:01 | 35.107 |
| 4/17/2010 13:08:00 | 26.0 | 11/27/2010 10:45:01 | 34.595 | 12/11/2010 15:25:01 | 35.107 |
| 4/17/2010 13:43:00 | 26.0 | 11/27/2010 11:05:01 | 33.535 | 12/11/2010 16:01:01 | 35.107 |
| 4/17/2010 14:18:00 | 26.0 | 11/27/2010 11:25:01 | 33.099 | 12/11/2010 16:37:01 | 35.107 |
| 4/17/2010 14:53:00 | 26.0 | 11/27/2010 11:45:01 | 34.283 | 12/11/2010 17:13:01 | 35.107 |
| 4/17/2010 15:28:00 | 26.0 | 11/27/2010 12:05:01 | 34.844 | 12/11/2010 17:49:01 | 35.107 |
| 4/17/2010 16:03:00 | 26.0 | 11/27/2010 12:25:01 | 33.847 | 12/11/2010 18:25:01 | 34.608 |
| 4/17/2010 16:38:00 | 26.0 | 11/27/2010 12:45:01 | 33.784 | 12/11/2010 19:01:01 | 34.608 |
| 4/17/2010 17:13:00 | 26.0 | 11/27/2010 13:05:01 | 34.532 | 12/11/2010 19:37:01 | 34.608 |
| 4/17/2010 17:48:00 | 26.0 | 11/27/2010 13:25:01 | 35.093 | 12/11/2010 20:13:01 | 34.608 |
| 4/17/2010 18:23:00 | 26.0 | 11/27/2010 13:45:01 | 34.844 | 12/11/2010 20:49:01 | 34.110 |
| 4/17/2010 18:58:00 | 26.0 | 11/27/2010 14:05:01 | 35.778 | 12/11/2010 21:25:01 | 34.110 |
| 4/17/2010 19:33:00 | 26.0 | 11/27/2010 14:25:01 | 35.404 | 12/11/2010 22:01:01 | 34.110 |
| 4/17/2010 20:08:00 | 26.0 | 11/27/2010 14:45:01 | 35.778 | 12/11/2010 22:37:01 | 34.110 |
| 4/17/2010 20:43:00 | 26.0 | 11/27/2010 15:05:01 | 34.470 | 12/11/2010 23:13:01 | 34.608 |
| 4/17/2010 21:18:00 | 26.5 | 11/27/2010 15:25:01 | 33.597 | 12/11/2010 23:49:01 | 34.608 |
| 4/17/2010 21:53:00 | 26.5 | 11/27/2010 15:45:01 | 33.286 | 12/12/2010 00:25:01 | 34.608 |
| 4/17/2010 22:28:00 | 26.5 | 11/27/2010 16:05:01 | 32.725 | 12/12/2010 01:01:01 | 34.608 |
| 4/17/2010 23:03:00 | 26.0 | 11/27/2010 16:25:01 | 32.912 | 12/12/2010 01:37:01 | 34.608 |



|                    |      |                     |        |                     |        |
|--------------------|------|---------------------|--------|---------------------|--------|
| 4/17/2010 23:38:00 | 26.0 | 11/27/2010 16:45:01 | 32.600 | 12/12/2010 02:13:01 | 34.608 |
| 4/18/2010 00:13:00 | 26.0 | 11/27/2010 17:05:01 | 31.727 | 12/12/2010 02:49:01 | 35.107 |
| 4/18/2010 00:48:00 | 26.0 | 11/27/2010 17:25:01 | 30.167 | 12/12/2010 03:25:01 | 34.608 |
| 4/18/2010 01:23:00 | 26.0 | 11/27/2010 17:45:01 | 29.419 | 12/12/2010 04:01:01 | 33.113 |
| 4/18/2010 01:58:00 | 26.0 | 11/27/2010 18:05:01 | 28.732 | 12/12/2010 04:37:01 | 33.612 |
| 4/18/2010 02:33:00 | 26.0 | 11/27/2010 18:25:01 | 27.920 | 12/12/2010 05:13:01 | 33.113 |
| 4/18/2010 03:08:00 | 26.0 | 11/27/2010 18:45:01 | 27.233 | 12/12/2010 05:49:01 | 33.113 |
| 4/18/2010 03:43:00 | 26.0 | 11/27/2010 19:05:01 | 26.671 | 12/12/2010 06:25:01 | 33.113 |
| 4/18/2010 04:18:00 | 26.0 | 11/27/2010 19:25:01 | 26.234 | 12/12/2010 07:01:01 | 33.612 |
| 4/18/2010 04:53:00 | 26.0 | 11/27/2010 19:45:01 | 25.859 | 12/12/2010 07:37:01 | 34.110 |
| 4/18/2010 05:28:00 | 26.0 | 11/27/2010 20:05:01 | 25.484 | 12/12/2010 08:13:01 | 34.110 |
| 4/18/2010 06:03:00 | 26.0 | 11/27/2010 20:25:01 | 25.172 | 12/12/2010 08:49:01 | 34.110 |
| 4/18/2010 06:38:00 | 26.0 | 11/27/2010 20:45:01 | 25.047 | 12/12/2010 09:25:01 | 33.612 |
| 4/18/2010 07:13:00 | 26.0 | 11/27/2010 21:05:01 | 24.984 | 12/12/2010 10:01:01 | 33.612 |
| 4/18/2010 07:48:00 | 26.0 | 11/27/2010 21:25:01 | 24.672 | 12/12/2010 10:37:01 | 33.612 |
| 4/18/2010 08:23:00 | 26.0 | 11/27/2010 21:45:01 | 24.297 | 12/12/2010 11:13:01 | 33.612 |
| 4/18/2010 08:58:00 | 26.0 | 11/27/2010 22:05:01 | 23.922 | 12/12/2010 11:49:01 | 33.612 |
| 4/18/2010 09:33:00 | 26.0 | 11/27/2010 22:25:01 | 23.609 | 12/12/2010 12:25:01 | 33.612 |
| 4/18/2010 10:08:00 | 26.0 | 11/27/2010 22:45:01 | 23.359 | 12/12/2010 13:01:01 | 33.612 |
| 4/18/2010 10:43:00 | 26.0 | 11/27/2010 23:05:01 | 23.172 | 12/12/2010 13:37:01 | 33.113 |
| 4/18/2010 11:18:00 | 26.0 | 11/27/2010 23:25:01 | 23.172 | 12/12/2010 14:13:01 | 33.113 |
| 4/18/2010 11:53:00 | 26.0 | 11/27/2010 23:45:01 | 23.297 | 12/12/2010 14:49:01 | 33.113 |
| 4/18/2010 12:28:00 | 26.0 | 11/28/2010 00:05:01 | 23.359 | 12/12/2010 15:25:01 | 33.113 |
| 4/18/2010 13:03:00 | 26.0 | 11/28/2010 00:25:01 | 23.359 | 12/12/2010 16:01:01 | 33.113 |
| 4/18/2010 13:38:00 | 26.0 | 11/28/2010 00:45:01 | 23.672 | 12/12/2010 16:37:01 | 33.113 |
| 4/18/2010 14:13:00 | 26.0 | 11/28/2010 01:05:01 | 23.609 | 12/12/2010 17:13:01 | 33.113 |
| 4/18/2010 14:48:00 | 26.0 | 11/28/2010 01:25:01 | 23.422 | 12/12/2010 17:49:01 | 33.113 |
| 4/18/2010 15:23:00 | 26.0 | 11/28/2010 01:45:01 | 23.234 | 12/12/2010 18:25:01 | 33.113 |
| 4/18/2010 15:58:00 | 26.0 | 11/28/2010 02:05:01 | 23.109 | 12/12/2010 19:01:01 | 33.612 |
| 4/18/2010 16:33:00 | 26.0 | 11/28/2010 02:25:01 | 23.047 | 12/12/2010 19:37:01 | 34.608 |
| 4/18/2010 17:08:00 | 26.0 | 11/28/2010 02:45:01 | 22.984 | 12/12/2010 20:13:01 | 34.608 |
| 4/18/2010 17:43:00 | 26.5 | 11/28/2010 03:05:01 | 22.796 | 12/12/2010 20:49:01 | 35.107 |
| 4/18/2010 18:18:00 | 26.5 | 11/28/2010 03:25:01 | 22.859 | 12/12/2010 21:25:01 | 35.107 |
| 4/18/2010 18:53:00 | 26.5 | 11/28/2010 03:45:01 | 22.921 | 12/12/2010 22:01:01 | 35.107 |
| 4/18/2010 19:28:00 | 26.5 | 11/28/2010 04:05:01 | 22.921 | 12/12/2010 22:37:01 | 35.107 |
| 4/18/2010 20:03:00 | 26.5 | 11/28/2010 04:25:01 | 22.734 | 12/12/2010 23:13:01 | 34.608 |
| 4/18/2010 20:38:00 | 26.5 | 11/28/2010 04:45:01 | 22.921 | 12/12/2010 23:49:01 | 34.608 |
| 4/18/2010 21:13:00 | 26.5 | 11/28/2010 05:05:01 | 23.109 | 12/13/2010 00:25:01 | 34.608 |
| 4/18/2010 21:48:00 | 26.5 | 11/28/2010 05:25:01 | 23.047 | 12/13/2010 01:01:01 | 34.608 |
| 4/18/2010 22:23:00 | 26.5 | 11/28/2010 05:45:01 | 22.984 | 12/13/2010 01:37:01 | 34.608 |
| 4/18/2010 22:58:00 | 26.5 | 11/28/2010 06:05:01 | 23.547 | 12/13/2010 02:13:01 | 34.608 |
| 4/18/2010 23:33:00 | 26.5 | 11/28/2010 06:25:01 | 24.297 | 12/13/2010 02:49:01 | 34.608 |
| 4/19/2010 00:08:00 | 26.5 | 11/28/2010 06:45:01 | 24.859 | 12/13/2010 03:25:01 | 34.608 |
| 4/19/2010 00:43:00 | 26.5 | 11/28/2010 07:05:01 | 26.172 | 12/13/2010 04:01:01 | 35.107 |
| 4/19/2010 01:18:00 | 26.5 | 11/28/2010 07:25:01 | 25.984 | 12/13/2010 04:37:01 | 35.107 |
| 4/19/2010 01:53:00 | 26.5 | 11/28/2010 07:45:01 | 26.297 | 12/13/2010 05:13:01 | 35.107 |
| 4/19/2010 02:28:00 | 26.5 | 11/28/2010 08:05:01 | 26.859 | 12/13/2010 05:49:01 | 35.107 |
| 4/19/2010 03:03:00 | 26.5 | 11/28/2010 08:25:01 | 27.733 | 12/13/2010 06:25:01 | 35.107 |
| 4/19/2010 03:38:00 | 26.5 | 11/28/2010 08:45:01 | 29.419 | 12/13/2010 07:01:01 | 35.107 |
| 4/19/2010 04:13:00 | 26.5 | 11/28/2010 09:05:01 | 30.355 | 12/13/2010 07:37:01 | 35.107 |

|                    |      |                     |        |                     |        |
|--------------------|------|---------------------|--------|---------------------|--------|
| 4/19/2010 04:48:00 | 26.5 | 11/28/2010 09:25:01 | 32.226 | 12/13/2010 08:13:01 | 35.107 |
| 4/19/2010 05:23:00 | 26.5 | 11/28/2010 09:45:01 | 34.034 | 12/13/2010 08:49:01 | 34.608 |
| 4/19/2010 05:58:00 | 26.5 | 11/28/2010 10:05:01 | 34.408 | 12/13/2010 09:25:01 | 34.608 |
| 4/19/2010 06:33:00 | 26.5 | 11/28/2010 10:25:01 | 34.844 | 12/13/2010 10:01:01 | 34.608 |
| 4/19/2010 07:08:00 | 26.5 | 11/28/2010 10:45:01 | 34.906 | 12/13/2010 10:37:01 | 34.608 |
| 4/19/2010 07:43:00 | 26.5 | 11/28/2010 11:05:01 | 34.844 | 12/13/2010 11:13:01 | 34.608 |
| 4/19/2010 08:18:00 | 26.0 | 11/28/2010 11:25:01 | 33.784 | 12/13/2010 11:49:01 | 34.608 |
| 4/19/2010 08:53:00 | 26.0 | 11/28/2010 11:45:01 | 32.787 | 12/13/2010 12:25:01 | 34.608 |
| 4/19/2010 09:28:00 | 26.0 | 11/28/2010 12:05:01 | 34.345 | 12/13/2010 13:01:01 | 34.608 |
| 4/19/2010 10:03:00 | 26.0 | 11/28/2010 12:25:01 | 36.837 | 12/13/2010 13:37:01 | 34.608 |
| 4/19/2010 10:38:00 | 26.0 | 11/28/2010 12:45:01 | 35.529 | 12/13/2010 14:13:01 | 34.608 |
| 4/19/2010 11:13:00 | 26.0 | 11/28/2010 13:05:01 | 35.778 | 12/13/2010 14:49:01 | 34.608 |
| 4/19/2010 11:48:00 | 26.0 | 11/28/2010 13:25:01 | 35.529 | 12/13/2010 15:25:01 | 34.608 |
| 4/19/2010 12:23:00 | 26.0 | 11/28/2010 13:45:01 | 35.404 | 12/13/2010 16:01:01 | 34.608 |
| 4/19/2010 12:58:00 | 26.5 | 11/28/2010 14:05:01 | 37.273 | 12/13/2010 16:37:01 | 34.608 |
| 4/19/2010 13:33:00 | 26.5 | 11/28/2010 14:25:01 | 35.654 | 12/13/2010 17:13:01 | 34.110 |
| 4/19/2010 14:08:00 | 26.5 | 11/28/2010 14:45:01 | 33.597 | 12/13/2010 17:49:01 | 34.110 |
| 4/19/2010 14:43:00 | 26.5 | 11/28/2010 15:05:01 | 32.475 | 12/13/2010 18:25:01 | 34.608 |
| 4/19/2010 15:18:00 | 26.5 | 11/28/2010 15:25:01 | 33.847 | 12/13/2010 19:01:01 | 35.107 |
| 4/19/2010 15:53:00 | 26.5 | 11/28/2010 15:45:01 | 34.345 | 12/13/2010 19:37:01 | 35.107 |
| 4/19/2010 16:28:00 | 26.5 | 11/28/2010 16:05:01 | 34.345 | 12/13/2010 20:13:01 | 35.107 |
| 4/19/2010 17:03:00 | 26.5 | 11/28/2010 16:25:01 | 33.410 | 12/13/2010 20:49:01 | 35.107 |
| 4/19/2010 17:38:00 | 26.5 | 11/28/2010 16:45:01 | 32.475 | 12/13/2010 21:25:01 | 35.107 |
| 4/19/2010 18:13:00 | 26.5 | 11/28/2010 17:05:01 | 31.290 | 12/13/2010 22:01:01 | 35.107 |
| 4/19/2010 18:48:00 | 26.5 | 11/28/2010 17:25:01 | 30.230 | 12/13/2010 22:37:01 | 35.107 |
| 4/19/2010 19:23:00 | 26.5 | 11/28/2010 17:45:01 | 29.356 | 12/13/2010 23:13:01 | 34.608 |
| 4/19/2010 19:58:00 | 26.5 | 11/28/2010 18:05:01 | 28.545 | 12/13/2010 23:49:01 | 34.608 |
| 4/19/2010 20:33:00 | 26.5 | 11/28/2010 18:25:01 | 27.858 | 12/14/2010 00:25:01 | 34.608 |
| 4/19/2010 21:08:00 | 26.5 | 11/28/2010 18:45:01 | 27.358 | 12/14/2010 01:01:01 | 34.608 |
| 4/19/2010 21:43:00 | 26.5 | 11/28/2010 19:05:01 | 26.921 | 12/14/2010 01:37:01 | 34.608 |
| 4/19/2010 22:18:00 | 26.5 | 11/28/2010 19:25:01 | 26.609 | 12/14/2010 02:13:01 | 35.107 |
| 4/19/2010 22:53:00 | 26.5 | 11/28/2010 19:45:01 | 26.297 | 12/14/2010 02:49:01 | 35.107 |
| 4/19/2010 23:28:00 | 26.5 | 11/28/2010 20:05:01 | 25.672 | 12/14/2010 03:25:01 | 34.608 |
| 4/20/2010 00:03:00 | 26.5 | 11/28/2010 20:25:01 | 25.047 | 12/14/2010 04:01:01 | 34.608 |
| 4/20/2010 00:38:00 | 26.5 | 11/28/2010 20:45:01 | 24.547 | 12/14/2010 04:37:01 | 34.608 |
| 4/20/2010 01:13:00 | 26.5 | 11/28/2010 21:05:01 | 24.109 | 12/14/2010 05:13:01 | 34.608 |
| 4/20/2010 01:48:00 | 26.5 | 11/28/2010 21:25:01 | 23.734 | 12/14/2010 05:49:01 | 34.608 |
| 4/20/2010 02:23:00 | 26.5 | 11/28/2010 21:45:01 | 23.484 | 12/14/2010 06:25:01 | 34.608 |
| 4/20/2010 02:58:00 | 26.5 | 11/28/2010 22:05:01 | 23.109 | 12/14/2010 07:01:01 | 34.608 |
| 4/20/2010 03:33:00 | 26.5 | 11/28/2010 22:25:01 | 22.921 | 12/14/2010 07:37:01 | 34.110 |
| 4/20/2010 04:08:00 | 26.5 | 11/28/2010 22:45:01 | 22.671 | 12/14/2010 08:13:01 | 34.608 |
| 4/20/2010 04:43:00 | 26.5 | 11/28/2010 23:05:01 | 22.546 | 12/14/2010 08:49:01 | 34.608 |
| 4/20/2010 05:18:00 | 26.5 | 11/28/2010 23:25:01 | 22.359 | 12/14/2010 09:25:01 | 35.107 |
| 4/20/2010 05:53:00 | 26.5 | 11/28/2010 23:45:01 | 22.234 | 12/14/2010 10:01:01 | 35.107 |
| 4/20/2010 06:28:00 | 26.5 | 11/29/2010 00:05:01 | 22.108 | 12/14/2010 10:37:01 | 35.107 |
| 4/20/2010 07:03:00 | 26.5 | 11/29/2010 00:25:01 | 22.234 | 12/14/2010 11:13:01 | 35.107 |
| 4/20/2010 07:38:00 | 26.5 | 11/29/2010 00:45:01 | 22.484 | 12/14/2010 11:49:01 | 35.107 |
| 4/20/2010 08:13:00 | 26.5 | 11/29/2010 01:05:01 | 22.609 | 12/14/2010 12:25:01 | 35.107 |
| 4/20/2010 08:48:00 | 26.5 | 11/29/2010 01:25:01 | 22.734 | 12/14/2010 13:01:01 | 35.605 |
| 4/20/2010 09:23:00 | 26.5 | 11/29/2010 01:45:01 | 22.609 | 12/14/2010 13:37:01 | 35.107 |

|                    |      |                     |        |                     |        |
|--------------------|------|---------------------|--------|---------------------|--------|
| 4/20/2010 09:58:00 | 26.5 | 11/29/2010 02:05:01 | 22.609 | 12/14/2010 14:13:01 | 35.107 |
| 4/20/2010 10:33:00 | 26.5 | 11/29/2010 02:25:01 | 22.421 | 12/14/2010 14:49:01 | 35.605 |
| 4/20/2010 11:08:00 | 26.5 | 11/29/2010 02:45:01 | 22.171 | 12/14/2010 15:25:01 | 35.605 |
| 4/20/2010 11:43:00 | 26.5 | 11/29/2010 03:05:01 | 21.921 | 12/14/2010 16:01:01 | 35.107 |
| 4/20/2010 12:18:00 | 26.5 | 11/29/2010 03:25:01 | 21.733 | 12/14/2010 16:37:01 | 35.107 |
| 4/20/2010 12:53:00 | 26.5 | 11/29/2010 03:45:01 | 21.671 | 12/14/2010 17:13:01 | 34.608 |
| 4/20/2010 13:28:00 | 26.5 | 11/29/2010 04:05:01 | 21.483 | 12/14/2010 17:49:01 | 34.608 |
| 4/20/2010 14:03:00 | 26.5 | 11/29/2010 04:25:01 | 21.295 | 12/14/2010 18:25:01 | 34.608 |
| 4/20/2010 14:38:00 | 26.5 | 11/29/2010 04:45:01 | 21.295 | 12/14/2010 19:01:01 | 34.608 |
| 4/20/2010 15:13:00 | 26.5 | 11/29/2010 05:05:01 | 21.358 | 12/14/2010 19:37:01 | 34.110 |
| 4/20/2010 15:48:00 | 26.5 | 11/29/2010 05:25:01 | 21.295 | 12/14/2010 20:13:01 | 34.608 |
| 4/20/2010 16:23:00 | 26.5 | 11/29/2010 05:45:01 | 21.608 | 12/14/2010 20:49:01 | 35.107 |
| 4/20/2010 16:58:00 | 26.5 | 11/29/2010 06:05:01 | 22.046 | 12/14/2010 21:25:01 | 34.608 |
| 4/20/2010 17:33:00 | 26.5 | 11/29/2010 06:25:01 | 22.734 | 12/14/2010 22:01:01 | 35.107 |
| 4/20/2010 18:08:00 | 26.5 | 11/29/2010 06:45:01 | 23.547 | 12/14/2010 22:37:01 | 35.107 |
| 4/20/2010 18:43:00 | 26.5 | 11/29/2010 07:05:01 | 24.734 | 12/14/2010 23:13:01 | 34.608 |
| 4/20/2010 19:18:00 | 26.5 | 11/29/2010 07:25:01 | 25.359 | 12/14/2010 23:49:01 | 34.608 |
| 4/20/2010 19:53:00 | 26.5 | 11/29/2010 07:45:01 | 25.672 | 12/15/2010 00:25:01 | 35.107 |
| 4/20/2010 20:28:00 | 26.5 | 11/29/2010 08:05:01 | 26.984 | 12/15/2010 01:01:01 | 35.107 |
| 4/20/2010 21:03:00 | 26.5 | 11/29/2010 08:25:01 | 27.233 | 12/15/2010 01:37:01 | 35.107 |
| 4/20/2010 21:38:00 | 26.5 | 11/29/2010 08:45:01 | 26.921 | 12/15/2010 02:13:01 | 34.608 |
| 4/20/2010 22:13:00 | 26.5 | 11/29/2010 09:05:01 | 25.609 | 12/15/2010 02:49:01 | 34.608 |
| 4/20/2010 22:48:00 | 26.5 | 11/29/2010 09:25:01 | 23.234 | 12/15/2010 03:25:01 | 34.608 |
| 4/20/2010 23:23:00 | 26.5 | 11/29/2010 09:45:01 | 23.172 | 12/15/2010 04:01:01 | 35.107 |
| 4/20/2010 23:58:00 | 26.5 | 11/29/2010 10:05:01 | 23.609 | 12/15/2010 04:37:01 | 35.107 |
| 4/21/2010 00:33:00 | 26.5 | 11/29/2010 10:25:01 | 24.484 | 12/15/2010 05:13:01 | 35.107 |
| 4/21/2010 01:08:00 | 26.5 | 11/29/2010 10:45:01 | 25.672 | 12/15/2010 05:49:01 | 34.608 |
| 4/21/2010 01:43:00 | 26.5 | 11/29/2010 11:05:01 | 26.359 | 12/15/2010 06:25:01 | 34.608 |
| 4/21/2010 02:18:00 | 26.5 | 11/29/2010 11:25:01 | 27.109 | 12/15/2010 07:01:01 | 34.608 |
| 4/21/2010 02:53:00 | 26.5 | 11/29/2010 11:45:01 | 29.731 | 12/15/2010 07:37:01 | 34.608 |
| 4/21/2010 03:28:00 | 26.5 | 11/29/2010 12:05:01 | 30.729 | 12/15/2010 08:13:01 | 34.608 |
| 4/21/2010 04:03:00 | 26.5 | 11/29/2010 12:25:01 | 31.228 | 12/15/2010 08:49:01 | 34.608 |
| 4/21/2010 04:38:00 | 26.5 | 11/29/2010 12:45:01 | 32.163 | 12/15/2010 09:25:01 | 34.608 |
| 4/21/2010 05:13:00 | 26.5 | 11/29/2010 13:05:01 | 33.099 | 12/15/2010 10:01:01 | 34.608 |
| 4/21/2010 05:48:00 | 26.5 | 11/29/2010 13:25:01 | 34.345 | 12/15/2010 10:37:01 | 34.608 |
| 4/21/2010 06:23:00 | 26.5 | 11/29/2010 13:45:01 | 35.093 | 12/15/2010 11:13:01 | 34.608 |
| 4/21/2010 06:58:00 | 26.5 | 11/29/2010 14:05:01 | 35.218 | 12/15/2010 11:49:01 | 35.107 |
| 4/21/2010 07:33:00 | 26.5 | 11/29/2010 14:25:01 | 35.280 | 12/15/2010 12:25:01 | 35.107 |
| 4/21/2010 08:08:00 | 26.5 | 11/29/2010 14:45:01 | 34.158 | 12/15/2010 13:01:01 | 35.107 |
| 4/21/2010 08:43:00 | 26.5 | 11/29/2010 15:05:01 | 32.725 | 12/15/2010 13:37:01 | 35.107 |
| 4/21/2010 09:18:00 | 26.5 | 11/29/2010 15:25:01 | 31.976 | 12/15/2010 14:13:01 | 35.107 |
| 4/21/2010 09:53:00 | 26.5 | 11/29/2010 15:45:01 | 30.916 | 12/15/2010 14:49:01 | 35.107 |
| 4/21/2010 10:28:00 | 26.5 | 11/29/2010 16:05:01 | 30.292 | 12/15/2010 15:25:01 | 35.107 |
| 4/21/2010 11:03:00 | 26.5 | 11/29/2010 16:25:01 | 29.543 | 12/15/2010 16:01:01 | 34.608 |
| 4/21/2010 11:38:00 | 26.5 | 11/29/2010 16:45:01 | 28.919 | 12/15/2010 16:37:01 | 35.107 |
| 4/21/2010 12:13:00 | 26.5 | 11/29/2010 17:05:01 | 28.108 | 12/15/2010 17:13:01 | 35.107 |
| 4/21/2010 12:48:00 | 26.5 | 11/29/2010 17:25:01 | 27.358 | 12/15/2010 17:49:01 | 34.608 |
| 4/21/2010 13:23:00 | 26.5 | 11/29/2010 17:45:01 | 26.671 | 12/15/2010 18:25:01 | 34.110 |
| 4/21/2010 13:58:00 | 26.5 | 11/29/2010 18:05:01 | 26.172 | 12/15/2010 19:01:01 | 34.110 |
| 4/21/2010 14:33:00 | 26.5 | 11/29/2010 18:25:01 | 25.734 | 12/15/2010 19:37:01 | 34.110 |

|                    |      |                     |        |                     |        |
|--------------------|------|---------------------|--------|---------------------|--------|
| 4/21/2010 15:08:00 | 26.5 | 11/29/2010 18:45:01 | 25.422 | 12/15/2010 20:13:01 | 33.612 |
| 4/21/2010 15:43:00 | 26.5 | 11/29/2010 19:05:01 | 25.172 | 12/15/2010 20:49:01 | 33.612 |
| 4/21/2010 16:18:00 | 26.5 | 11/29/2010 19:25:01 | 25.109 | 12/15/2010 21:25:01 | 34.110 |
| 4/21/2010 16:53:00 | 26.5 | 11/29/2010 19:45:01 | 24.922 | 12/15/2010 22:01:01 | 34.110 |
| 4/21/2010 17:28:00 | 26.5 | 11/29/2010 20:24:01 | 25.689 | 12/15/2010 22:37:01 | 34.110 |
| 4/21/2010 18:03:00 | 26.5 | 11/29/2010 20:44:01 | 25.064 | 12/15/2010 23:13:01 | 34.608 |
| 4/21/2010 18:38:00 | 26.5 | 11/29/2010 21:04:01 | 24.814 | 12/15/2010 23:49:01 | 34.608 |
| 4/21/2010 19:13:00 | 26.5 | 11/29/2010 21:24:01 | 24.564 | 12/16/2010 00:25:01 | 34.608 |
| 4/21/2010 19:48:00 | 26.5 | 11/29/2010 21:44:01 | 24.252 | 12/16/2010 01:01:01 | 34.608 |
| 4/21/2010 20:23:00 | 26.5 | 11/29/2010 22:04:01 | 24.064 | 12/16/2010 01:37:01 | 34.608 |
| 4/21/2010 20:58:00 | 26.5 | 11/29/2010 22:24:01 | 23.814 | 12/16/2010 02:13:01 | 34.608 |
| 4/21/2010 21:33:00 | 26.5 | 11/29/2010 22:44:01 | 23.627 | 12/16/2010 02:49:01 | 35.107 |
| 4/21/2010 22:08:00 | 26.5 | 11/29/2010 23:04:01 | 23.564 | 12/16/2010 03:25:01 | 35.107 |
| 4/21/2010 22:43:00 | 26.5 | 11/29/2010 23:24:01 | 23.439 | 12/16/2010 04:01:01 | 35.107 |
| 4/21/2010 23:18:00 | 26.5 | 11/29/2010 23:44:01 | 23.376 | 12/16/2010 04:37:01 | 35.107 |
| 4/21/2010 23:53:00 | 26.5 | 11/30/2010 00:04:01 | 23.439 | 12/16/2010 05:13:01 | 35.107 |
| 4/22/2010 00:28:00 | 26.5 | 11/30/2010 00:24:01 | 23.627 | 12/16/2010 05:49:01 | 34.608 |
| 4/22/2010 01:03:00 | 26.5 | 11/30/2010 00:44:01 | 23.752 | 12/16/2010 06:25:01 | 34.608 |
| 4/22/2010 01:38:00 | 26.5 | 11/30/2010 01:04:01 | 23.752 | 12/16/2010 07:01:01 | 34.608 |
| 4/22/2010 02:13:00 | 26.5 | 11/30/2010 01:24:01 | 23.814 | 12/16/2010 07:37:01 | 35.605 |
| 4/22/2010 02:48:00 | 26.5 | 11/30/2010 01:44:01 | 23.939 | 12/16/2010 08:13:01 | 35.107 |
| 4/22/2010 03:23:00 | 26.5 | 11/30/2010 02:04:01 | 24.127 | 12/16/2010 08:49:01 | 35.605 |
| 4/22/2010 03:58:00 | 26.5 | 11/30/2010 02:24:01 | 24.127 | 12/16/2010 09:25:01 | 35.605 |
| 4/22/2010 04:33:00 | 26.5 | 11/30/2010 02:44:01 | 23.814 | 12/16/2010 10:01:01 | 36.103 |
| 4/22/2010 05:08:00 | 26.5 | 11/30/2010 03:04:01 | 23.627 | 12/16/2010 10:37:01 | 36.601 |
| 4/22/2010 05:43:00 | 26.5 | 11/30/2010 03:24:01 | 23.752 | 12/16/2010 11:13:01 | 36.601 |
| 4/22/2010 06:18:00 | 26.5 | 11/30/2010 03:44:01 | 23.939 | 12/16/2010 11:49:01 | 36.601 |
| 4/22/2010 06:53:00 | 26.5 | 11/30/2010 04:04:01 | 23.877 | 12/16/2010 12:25:01 | 36.601 |
| 4/22/2010 07:28:00 | 26.5 | 11/30/2010 04:24:01 | 23.689 | 12/16/2010 13:01:01 | 36.601 |
| 4/22/2010 08:03:00 | 26.5 | 11/30/2010 04:44:01 | 23.376 | 12/16/2010 13:37:01 | 36.601 |
| 4/22/2010 08:38:00 | 26.5 | 11/30/2010 05:04:01 | 23.251 | 12/16/2010 14:13:01 | 36.601 |
| 4/22/2010 09:13:00 | 26.5 | 11/30/2010 05:24:01 | 23.501 | 12/16/2010 14:49:01 | 36.601 |
| 4/22/2010 09:48:00 | 26.0 | 11/30/2010 05:44:01 | 23.814 | 12/16/2010 15:25:01 | 36.103 |
| 4/22/2010 10:23:00 | 26.0 | 11/30/2010 06:04:01 | 24.689 | 12/16/2010 16:01:01 | 35.605 |
| 4/22/2010 10:58:00 | 26.0 | 11/30/2010 06:24:01 | 25.377 | 12/16/2010 16:37:01 | 35.107 |
| 4/22/2010 11:33:00 | 26.0 | 11/30/2010 06:44:01 | 26.064 | 12/16/2010 17:13:01 | 34.608 |
| 4/22/2010 12:08:00 | 26.0 | 11/30/2010 07:04:01 | 26.564 | 12/16/2010 17:49:01 | 34.608 |
| 4/22/2010 12:43:00 | 26.5 | 11/30/2010 07:24:01 | 26.877 | 12/16/2010 18:25:01 | 34.608 |
| 4/22/2010 13:18:00 | 26.5 | 11/30/2010 07:44:01 | 27.501 | 12/16/2010 19:01:01 | 34.110 |
| 4/22/2010 13:53:00 | 26.5 | 11/30/2010 08:04:01 | 27.938 | 12/16/2010 19:37:01 | 34.110 |
| 4/22/2010 14:28:00 | 26.5 | 11/30/2010 08:24:01 | 28.063 | 12/16/2010 20:13:01 | 34.110 |
| 4/22/2010 15:03:00 | 26.5 | 11/30/2010 08:44:01 | 29.000 | 12/16/2010 20:49:01 | 33.612 |
| 4/22/2010 15:38:00 | 26.5 | 11/30/2010 09:04:01 | 29.874 | 12/16/2010 21:25:01 | 33.612 |
| 4/22/2010 16:13:00 | 26.5 | 11/30/2010 09:24:01 | 31.870 | 12/16/2010 22:01:01 | 33.612 |
| 4/22/2010 16:48:00 | 26.5 | 11/30/2010 09:44:01 | 29.874 | 12/16/2010 22:37:01 | 33.612 |
| 4/22/2010 17:23:00 | 26.5 | 11/30/2010 10:04:01 | 31.933 | 12/16/2010 23:13:01 | 33.612 |
| 4/22/2010 17:58:00 | 26.5 | 11/30/2010 10:24:01 | 34.053 | 12/16/2010 23:49:01 | 33.612 |
| 4/22/2010 18:33:00 | 26.5 | 11/30/2010 10:44:01 | 34.988 | 12/17/2010 00:25:01 | 34.110 |
| 4/22/2010 19:08:00 | 26.5 | 11/30/2010 11:04:01 | 35.922 | 12/17/2010 01:01:01 | 34.110 |
| 4/22/2010 19:43:00 | 26.5 | 11/30/2010 11:24:01 | 35.860 | 12/17/2010 01:37:01 | 34.110 |

|                    |      |                     |        |                     |        |
|--------------------|------|---------------------|--------|---------------------|--------|
| 4/22/2010 20:18:00 | 26.5 | 11/30/2010 11:44:01 | 34.427 | 12/17/2010 02:13:01 | 34.110 |
| 4/22/2010 20:53:00 | 26.5 | 11/30/2010 12:04:01 | 35.112 | 12/17/2010 02:49:01 | 34.110 |
| 4/22/2010 21:28:00 | 26.5 | 11/30/2010 12:24:01 | 36.607 | 12/17/2010 03:25:01 | 34.110 |
| 4/22/2010 22:03:00 | 26.5 | 11/30/2010 12:44:01 | 33.928 | 12/17/2010 04:01:01 | 34.110 |
| 4/22/2010 22:38:00 | 26.5 | 11/30/2010 13:04:01 | 35.050 | 12/17/2010 04:37:01 | 34.110 |
| 4/22/2010 23:13:00 | 26.5 | 11/30/2010 13:24:01 | 38.040 | 12/17/2010 05:13:01 | 34.608 |
| 4/22/2010 23:48:00 | 26.5 | 11/30/2010 13:44:01 | 38.102 | 12/17/2010 05:49:01 | 34.608 |
| 4/23/2010 00:23:00 | 26.5 | 11/30/2010 14:04:01 | 35.361 | 12/17/2010 06:25:01 | 34.608 |
| 4/23/2010 00:58:00 | 26.5 | 11/30/2010 14:24:01 | 37.853 | 12/17/2010 07:01:01 | 34.608 |
| 4/23/2010 01:33:00 | 26.5 | 11/30/2010 14:44:01 | 36.919 | 12/17/2010 07:37:01 | 34.110 |
| 4/23/2010 02:08:00 | 26.5 | 11/30/2010 15:04:01 | 35.361 | 12/17/2010 08:13:01 | 34.110 |
| 4/23/2010 02:43:00 | 26.5 | 11/30/2010 15:24:01 | 35.361 | 12/17/2010 08:49:01 | 34.110 |
| 4/23/2010 03:18:00 | 26.5 | 11/30/2010 15:44:01 | 34.801 | 12/17/2010 09:25:01 | 34.110 |
| 4/23/2010 03:53:00 | 26.5 | 11/30/2010 16:04:01 | 34.738 | 12/17/2010 10:01:01 | 34.608 |
| 4/23/2010 04:28:00 | 26.5 | 11/30/2010 16:24:01 | 33.492 | 12/17/2010 10:37:01 | 34.110 |
| 4/23/2010 05:03:00 | 26.5 | 11/30/2010 16:44:01 | 31.933 | 12/17/2010 11:13:01 | 34.608 |
| 4/23/2010 05:38:00 | 26.5 | 11/30/2010 17:04:01 | 30.685 | 12/17/2010 11:49:01 | 35.107 |
| 4/23/2010 06:13:00 | 26.5 | 11/30/2010 17:24:01 | 29.811 | 12/17/2010 12:25:01 | 34.608 |
| 4/23/2010 06:48:00 | 26.5 | 11/30/2010 17:44:01 | 29.250 | 12/17/2010 13:01:01 | 34.608 |
| 4/23/2010 07:23:00 | 26.5 | 11/30/2010 18:04:01 | 28.813 | 12/17/2010 13:37:01 | 35.107 |
| 4/23/2010 07:58:00 | 26.5 | 11/30/2010 18:24:01 | 28.376 | 12/17/2010 14:13:01 | 35.107 |
| 4/23/2010 08:33:00 | 26.5 | 11/30/2010 18:44:01 | 28.063 | 12/17/2010 14:49:01 | 35.107 |
| 4/23/2010 09:08:00 | 26.5 | 11/30/2010 19:04:01 | 27.813 | 12/17/2010 15:25:01 | 34.608 |
| 4/23/2010 09:43:00 | 26.5 | 11/30/2010 19:24:01 | 27.376 | 12/17/2010 16:01:01 | 34.608 |
| 4/23/2010 10:18:00 | 26.5 | 11/30/2010 19:44:01 | 26.877 | 12/17/2010 16:37:01 | 34.608 |
| 4/23/2010 10:53:00 | 26.5 | 11/30/2010 20:04:01 | 26.564 | 12/17/2010 17:13:01 | 34.110 |
| 4/23/2010 11:28:00 | 26.5 | 11/30/2010 20:24:01 | 26.314 | 12/17/2010 17:49:01 | 33.612 |
| 4/23/2010 12:03:00 | 26.5 | 11/30/2010 20:44:01 | 26.314 | 12/17/2010 18:25:01 | 34.110 |
| 4/23/2010 12:38:00 | 26.5 | 11/30/2010 21:04:01 | 26.002 | 12/17/2010 19:01:01 | 34.110 |
| 4/23/2010 13:13:00 | 26.5 | 11/30/2010 21:24:01 | 25.439 | 12/17/2010 19:37:01 | 34.608 |
| 4/23/2010 13:48:00 | 26.5 | 11/30/2010 21:44:01 | 24.814 | 12/17/2010 20:13:01 | 34.608 |
| 4/23/2010 14:23:00 | 26.5 | 11/30/2010 22:04:01 | 24.314 | 12/17/2010 20:49:01 | 34.608 |
| 4/23/2010 14:58:00 | 26.5 | 11/30/2010 22:24:01 | 23.752 | 12/17/2010 21:25:01 | 34.608 |
| 4/23/2010 15:33:00 | 26.5 | 11/30/2010 22:44:01 | 23.314 | 12/17/2010 22:01:01 | 34.608 |
| 4/23/2010 16:08:00 | 26.5 | 11/30/2010 23:04:01 | 22.939 | 12/17/2010 22:37:01 | 34.608 |
| 4/23/2010 16:43:00 | 26.5 | 11/30/2010 23:24:01 | 22.688 | 12/17/2010 23:13:01 | 34.110 |
| 4/23/2010 17:18:00 | 26.5 | 11/30/2010 23:44:01 | 22.501 | 12/17/2010 23:49:01 | 34.608 |
| 4/23/2010 17:53:00 | 26.5 | 12/1/2010 00:04:01  | 22.438 | 12/18/2010 00:25:01 | 34.608 |
| 4/23/2010 18:28:00 | 26.5 | 12/1/2010 00:24:01  | 22.313 | 12/18/2010 01:01:01 | 34.608 |
| 4/23/2010 19:03:00 | 26.5 | 12/1/2010 00:44:01  | 22.125 | 12/18/2010 01:37:01 | 34.608 |
| 4/23/2010 19:38:00 | 26.5 | 12/1/2010 01:04:01  | 22.376 | 12/18/2010 02:13:01 | 34.110 |
| 4/23/2010 20:13:00 | 26.5 | 12/1/2010 01:24:01  | 22.438 | 12/18/2010 02:49:01 | 34.608 |
| 4/23/2010 20:48:00 | 26.5 | 12/1/2010 01:44:01  | 22.438 | 12/18/2010 03:25:01 | 34.608 |
| 4/23/2010 21:23:00 | 26.5 | 12/1/2010 02:04:01  | 22.188 | 12/18/2010 04:01:01 | 34.110 |
| 4/23/2010 21:58:00 | 26.5 | 12/1/2010 02:24:01  | 21.813 | 12/18/2010 04:37:01 | 34.608 |
| 4/23/2010 22:33:00 | 26.5 | 12/1/2010 02:44:01  | 21.562 | 12/18/2010 05:13:01 | 33.612 |
| 4/23/2010 23:08:00 | 26.5 | 12/1/2010 03:04:01  | 21.312 | 12/18/2010 05:49:01 | 33.612 |
| 4/23/2010 23:43:00 | 26.5 | 12/1/2010 03:24:01  | 21.124 | 12/18/2010 06:25:01 | 33.612 |
| 4/24/2010 00:18:00 | 26.5 | 12/1/2010 03:44:01  | 21.124 | 12/18/2010 07:01:01 | 33.612 |
| 4/24/2010 00:53:00 | 26.5 | 12/1/2010 04:04:01  | 21.187 | 12/18/2010 07:37:01 | 33.612 |

|                    |      |                    |        |                     |        |
|--------------------|------|--------------------|--------|---------------------|--------|
| 4/24/2010 01:28:00 | 26.5 | 12/1/2010 04:24:01 | 21.249 | 12/18/2010 08:13:01 | 33.612 |
| 4/24/2010 02:03:00 | 26.5 | 12/1/2010 04:44:01 | 21.375 | 12/18/2010 08:49:01 | 33.113 |
| 4/24/2010 02:38:00 | 26.5 | 12/1/2010 05:04:01 | 21.562 | 12/18/2010 09:25:01 | 32.615 |
| 4/24/2010 03:13:00 | 26.5 | 12/1/2010 05:24:01 | 21.625 | 12/18/2010 10:01:01 | 32.615 |
| 4/24/2010 03:48:00 | 26.5 | 12/1/2010 05:44:01 | 21.813 | 12/18/2010 10:37:01 | 34.110 |
| 4/24/2010 04:23:00 | 26.5 | 12/1/2010 06:04:01 | 22.313 | 12/18/2010 11:13:01 | 35.107 |
| 4/24/2010 04:58:00 | 26.5 | 12/1/2010 06:24:01 | 23.376 | 12/18/2010 11:49:01 | 35.107 |
| 4/24/2010 05:33:00 | 26.5 | 12/1/2010 06:44:01 | 25.002 | 12/18/2010 12:25:01 | 35.107 |
| 4/24/2010 06:08:00 | 26.5 | 12/1/2010 07:04:01 | 26.064 | 12/18/2010 13:01:01 | 35.107 |
| 4/24/2010 06:43:00 | 26.5 | 12/1/2010 07:24:01 | 28.563 | 12/18/2010 13:37:01 | 35.107 |
| 4/24/2010 07:18:00 | 26.5 | 12/1/2010 07:44:01 | 30.123 | 12/18/2010 14:13:01 | 35.107 |
| 4/24/2010 07:53:00 | 26.5 | 12/1/2010 08:04:01 | 30.810 | 12/18/2010 14:49:01 | 35.107 |
| 4/24/2010 08:28:00 | 26.5 | 12/1/2010 08:24:01 | 31.309 | 12/18/2010 15:25:01 | 35.107 |
| 4/24/2010 09:03:00 | 26.5 | 12/1/2010 08:44:01 | 31.808 | 12/18/2010 16:01:01 | 35.107 |
| 4/24/2010 09:38:00 | 26.5 | 12/1/2010 09:04:01 | 32.556 | 12/18/2010 16:37:01 | 34.608 |
| 4/24/2010 10:13:00 | 26.5 | 12/1/2010 09:24:01 | 33.616 | 12/18/2010 17:13:01 | 34.110 |
| 4/24/2010 10:48:00 | 26.5 | 12/1/2010 09:44:01 | 35.860 | 12/18/2010 17:49:01 | 33.612 |
| 4/24/2010 11:23:00 | 26.5 | 12/1/2010 10:04:01 | 36.358 | 12/18/2010 18:25:01 | 32.615 |
| 4/24/2010 11:58:00 | 26.5 | 12/1/2010 10:24:01 | 35.673 | 12/18/2010 19:01:01 | 33.113 |
| 4/24/2010 12:33:00 | 26.5 | 12/1/2010 10:44:01 | 36.981 | 12/18/2010 19:37:01 | 33.612 |
| 4/24/2010 13:08:00 | 26.5 | 12/1/2010 11:04:01 | 37.355 | 12/18/2010 20:13:01 | 34.110 |
| 4/24/2010 13:43:00 | 26.5 | 12/1/2010 11:24:01 | 37.853 | 12/18/2010 20:49:01 | 34.110 |
| 4/24/2010 14:18:00 | 26.5 | 12/1/2010 11:44:01 | 38.538 | 12/18/2010 21:25:01 | 34.110 |
| 4/24/2010 14:53:00 | 26.5 | 12/1/2010 12:04:01 | 38.164 | 12/18/2010 22:01:01 | 34.110 |
| 4/24/2010 15:28:00 | 26.5 | 12/1/2010 12:24:01 | 38.351 | 12/18/2010 22:37:01 | 34.110 |
| 4/24/2010 16:03:00 | 26.5 | 12/1/2010 12:44:01 | 37.791 | 12/18/2010 23:13:01 | 34.110 |
| 4/24/2010 16:38:00 | 26.5 | 12/1/2010 13:04:01 | 39.160 | 12/18/2010 23:49:01 | 34.110 |
| 4/24/2010 17:13:00 | 26.5 | 12/1/2010 13:24:01 | 37.853 | 12/19/2010 00:25:01 | 34.110 |
| 4/24/2010 17:48:00 | 26.5 | 12/1/2010 13:44:01 | 40.093 | 12/19/2010 01:01:01 | 34.110 |
| 4/24/2010 18:23:00 | 26.5 | 12/1/2010 14:04:01 | 39.098 | 12/19/2010 01:37:01 | 34.608 |
| 4/24/2010 18:58:00 | 26.5 | 12/1/2010 14:24:01 | 38.040 | 12/19/2010 02:13:01 | 34.608 |
| 4/24/2010 19:33:00 | 26.5 | 12/1/2010 14:44:01 | 39.471 | 12/19/2010 02:49:01 | 34.110 |
| 4/24/2010 20:08:00 | 26.5 | 12/1/2010 15:04:01 | 37.168 | 12/19/2010 03:25:01 | 33.612 |
| 4/24/2010 20:43:00 | 26.5 | 12/1/2010 15:24:01 | 36.794 | 12/19/2010 04:01:01 | 33.113 |
| 4/24/2010 21:18:00 | 26.5 | 12/1/2010 15:44:01 | 36.981 | 12/19/2010 04:37:01 | 32.615 |
| 4/24/2010 21:53:00 | 26.5 | 12/1/2010 16:04:01 | 37.043 | 12/19/2010 05:13:01 | 32.615 |
| 4/24/2010 22:28:00 | 26.5 | 12/1/2010 16:24:01 | 35.984 | 12/19/2010 05:49:01 | 32.116 |
| 4/24/2010 23:03:00 | 26.5 | 12/1/2010 16:44:01 | 34.676 | 12/19/2010 06:25:01 | 32.116 |
| 4/24/2010 23:38:00 | 26.5 | 12/1/2010 17:04:01 | 33.616 | 12/19/2010 07:01:01 | 32.116 |
| 4/25/2010 00:13:00 | 26.5 | 12/1/2010 17:24:01 | 32.619 | 12/19/2010 07:37:01 | 33.113 |
| 4/25/2010 00:48:00 | 26.5 | 12/1/2010 17:44:01 | 31.558 | 12/19/2010 08:13:01 | 33.612 |
| 4/25/2010 01:23:00 | 26.5 | 12/1/2010 18:04:01 | 30.623 | 12/19/2010 08:49:01 | 33.612 |
| 4/25/2010 01:58:00 | 26.5 | 12/1/2010 18:24:01 | 29.999 | 12/19/2010 09:25:01 | 34.110 |
| 4/25/2010 02:33:00 | 26.5 | 12/1/2010 18:44:01 | 29.562 | 12/19/2010 10:01:01 | 33.113 |
| 4/25/2010 03:08:00 | 26.5 | 12/1/2010 19:04:01 | 29.312 | 12/19/2010 10:37:01 | 33.113 |
| 4/25/2010 03:43:00 | 26.5 | 12/1/2010 19:24:01 | 29.062 | 12/19/2010 11:13:01 | 33.612 |
| 4/25/2010 04:18:00 | 26.5 | 12/1/2010 19:44:01 | 28.001 | 12/19/2010 11:49:01 | 33.612 |
| 4/25/2010 04:53:00 | 26.5 | 12/1/2010 20:04:01 | 26.564 | 12/19/2010 12:25:01 | 33.612 |
| 4/25/2010 05:28:00 | 26.5 | 12/1/2010 20:24:01 | 25.939 | 12/19/2010 13:01:01 | 34.110 |
| 4/25/2010 06:03:00 | 26.5 | 12/1/2010 20:44:01 | 25.627 | 12/19/2010 13:37:01 | 34.110 |

|                    |      |                    |        |                     |        |
|--------------------|------|--------------------|--------|---------------------|--------|
| 4/25/2010 06:38:00 | 26.5 | 12/1/2010 21:04:01 | 25.439 | 12/19/2010 14:13:01 | 33.612 |
| 4/25/2010 07:13:00 | 26.5 | 12/1/2010 21:24:01 | 25.252 | 12/19/2010 14:49:01 | 33.612 |
| 4/25/2010 07:48:00 | 26.5 | 12/1/2010 21:44:01 | 25.002 | 12/19/2010 15:25:01 | 33.113 |
| 4/25/2010 08:23:00 | 26.5 | 12/1/2010 22:04:01 | 24.877 | 12/19/2010 16:01:01 | 32.615 |
| 4/25/2010 08:58:00 | 26.5 | 12/1/2010 22:24:01 | 24.627 | 12/19/2010 16:37:01 | 33.612 |
| 4/25/2010 09:33:00 | 26.5 | 12/1/2010 22:44:01 | 24.189 | 12/19/2010 17:13:01 | 34.110 |
| 4/25/2010 10:08:00 | 26.5 | 12/1/2010 23:04:01 | 23.877 | 12/19/2010 17:49:01 | 34.608 |
| 4/25/2010 10:43:00 | 26.5 | 12/1/2010 23:24:01 | 23.689 | 12/19/2010 18:25:01 | 34.110 |
| 4/25/2010 11:18:00 | 26.5 | 12/1/2010 23:44:01 | 23.689 | 12/19/2010 19:01:01 | 34.110 |
| 4/25/2010 11:53:00 | 26.5 | 12/2/2010 00:04:01 | 23.627 | 12/19/2010 19:37:01 | 34.110 |
| 4/25/2010 12:28:00 | 26.5 | 12/2/2010 00:24:01 | 23.689 | 12/19/2010 20:13:01 | 34.608 |
| 4/25/2010 13:03:00 | 26.5 | 12/2/2010 00:44:01 | 23.689 | 12/19/2010 20:49:01 | 33.612 |
| 4/25/2010 13:38:00 | 26.5 | 12/2/2010 01:04:01 | 23.564 | 12/19/2010 21:25:01 | 33.612 |
| 4/25/2010 14:13:00 | 26.5 | 12/2/2010 01:24:01 | 23.564 | 12/19/2010 22:01:01 | 33.113 |
| 4/25/2010 14:48:00 | 26.5 | 12/2/2010 01:44:01 | 23.564 | 12/19/2010 22:37:01 | 33.113 |
| 4/25/2010 15:23:00 | 26.5 | 12/2/2010 02:04:01 | 23.439 | 12/19/2010 23:13:01 | 32.615 |
| 4/25/2010 15:58:00 | 26.5 | 12/2/2010 02:24:01 | 23.251 | 12/19/2010 23:49:01 | 32.615 |
| 4/25/2010 16:33:00 | 26.5 | 12/2/2010 02:44:01 | 23.001 | 12/20/2010 00:25:01 | 32.116 |
| 4/25/2010 17:08:00 | 26.5 | 12/2/2010 03:04:01 | 22.751 | 12/20/2010 01:01:01 | 32.116 |
| 4/25/2010 17:43:00 | 26.5 | 12/2/2010 03:24:01 | 22.626 | 12/20/2010 01:37:01 | 31.617 |
| 4/25/2010 18:18:00 | 26.5 | 12/2/2010 03:44:01 | 22.376 | 12/20/2010 02:13:01 | 31.617 |
| 4/25/2010 18:53:00 | 26.5 | 12/2/2010 04:04:01 | 22.313 | 12/20/2010 02:49:01 | 31.617 |
| 4/25/2010 19:28:00 | 26.5 | 12/2/2010 04:24:01 | 22.125 | 12/20/2010 03:25:01 | 32.116 |
| 4/25/2010 20:03:00 | 26.5 | 12/2/2010 04:44:01 | 22.063 | 12/20/2010 04:01:01 | 33.113 |
| 4/25/2010 20:38:00 | 26.5 | 12/2/2010 05:04:01 | 22.063 | 12/20/2010 04:37:01 | 34.110 |
| 4/25/2010 21:13:00 | 26.5 | 12/2/2010 05:24:01 | 22.063 | 12/20/2010 05:13:01 | 34.110 |
| 4/25/2010 21:48:00 | 26.5 | 12/2/2010 05:44:01 | 22.501 | 12/20/2010 05:49:01 | 34.110 |
| 4/25/2010 22:23:00 | 26.5 | 12/2/2010 06:04:01 | 23.376 | 12/20/2010 06:25:01 | 34.608 |
| 4/25/2010 22:58:00 | 26.5 | 12/2/2010 06:24:01 | 24.502 | 12/20/2010 07:01:01 | 34.608 |
| 4/25/2010 23:33:00 | 26.5 | 12/2/2010 06:44:01 | 25.252 | 12/20/2010 07:37:01 | 34.110 |
| 4/26/2010 00:08:00 | 26.5 | 12/2/2010 07:04:01 | 26.377 | 12/20/2010 08:13:01 | 34.608 |
| 4/26/2010 00:43:00 | 26.5 | 12/2/2010 07:24:01 | 26.752 | 12/20/2010 08:49:01 | 34.110 |
| 4/26/2010 01:18:00 | 26.5 | 12/2/2010 07:44:01 | 27.002 | 12/20/2010 09:25:01 | 33.612 |
| 4/26/2010 01:53:00 | 26.5 | 12/2/2010 08:04:01 | 27.689 | 12/20/2010 10:01:01 | 33.612 |
| 4/26/2010 02:28:00 | 26.5 | 12/2/2010 08:24:01 | 28.563 | 12/20/2010 10:37:01 | 33.612 |
| 4/26/2010 03:03:00 | 26.5 | 12/2/2010 08:44:01 | 29.811 | 12/20/2010 11:13:01 | 33.612 |
| 4/26/2010 03:38:00 | 26.5 | 12/2/2010 09:04:01 | 30.498 | 12/20/2010 11:49:01 | 33.612 |
| 4/26/2010 04:13:00 | 26.5 | 12/2/2010 09:24:01 | 31.247 | 12/20/2010 12:25:01 | 33.113 |
| 4/26/2010 04:48:00 | 26.5 | 12/2/2010 09:44:01 | 30.248 | 12/20/2010 13:01:01 | 33.113 |
| 4/26/2010 05:23:00 | 26.5 | 12/2/2010 10:04:01 | 30.435 | 12/20/2010 13:37:01 | 33.612 |
| 4/26/2010 05:58:00 | 26.5 | 12/2/2010 10:24:01 | 31.496 | 12/20/2010 14:13:01 | 33.612 |
| 4/26/2010 06:33:00 | 26.0 | 12/2/2010 10:44:01 | 32.743 | 12/20/2010 14:49:01 | 33.612 |
| 4/26/2010 07:08:00 | 26.0 | 12/2/2010 11:04:01 | 34.115 | 12/20/2010 15:25:01 | 33.612 |
| 4/26/2010 07:43:00 | 26.0 | 12/2/2010 11:24:01 | 33.242 | 12/20/2010 16:01:01 | 34.110 |
| 4/26/2010 08:18:00 | 26.0 | 12/2/2010 11:44:01 | 32.931 | 12/20/2010 16:37:01 | 34.608 |
| 4/26/2010 08:53:00 | 26.0 | 12/2/2010 12:04:01 | 35.673 | 12/20/2010 17:13:01 | 34.608 |
| 4/26/2010 09:28:00 | 26.0 | 12/2/2010 12:24:01 | 34.676 | 12/20/2010 17:49:01 | 34.608 |
| 4/26/2010 10:03:00 | 26.0 | 12/2/2010 12:44:01 | 34.676 | 12/20/2010 18:25:01 | 34.608 |
| 4/26/2010 10:38:00 | 26.0 | 12/2/2010 13:04:01 | 35.735 | 12/20/2010 19:01:01 | 34.110 |
| 4/26/2010 11:13:00 | 26.0 | 12/2/2010 13:24:01 | 35.548 | 12/20/2010 19:37:01 | 33.612 |

|                    |      |                    |        |                     |        |
|--------------------|------|--------------------|--------|---------------------|--------|
| 4/26/2010 11:48:00 | 26.0 | 12/2/2010 13:44:01 | 35.237 | 12/20/2010 20:13:01 | 34.110 |
| 4/26/2010 12:23:00 | 26.0 | 12/2/2010 14:04:01 | 34.427 | 12/20/2010 20:49:01 | 34.110 |
| 4/26/2010 12:58:00 | 26.0 | 12/2/2010 14:24:01 | 34.988 | 12/20/2010 21:25:01 | 33.612 |
| 4/26/2010 13:33:00 | 26.0 | 12/2/2010 14:44:01 | 35.611 | 12/20/2010 22:01:01 | 33.612 |
| 4/26/2010 14:08:00 | 26.0 | 12/2/2010 15:04:01 | 35.486 | 12/20/2010 22:37:01 | 33.612 |
| 4/26/2010 14:43:00 | 26.0 | 12/2/2010 15:24:01 | 33.928 | 12/20/2010 23:13:01 | 33.612 |
| 4/26/2010 15:18:00 | 26.0 | 12/2/2010 15:44:01 | 33.367 | 12/20/2010 23:49:01 | 33.612 |
| 4/26/2010 15:53:00 | 26.0 | 12/2/2010 16:04:01 | 32.494 | 12/21/2010 00:25:01 | 33.612 |
| 4/26/2010 16:28:00 | 26.0 | 12/2/2010 16:24:01 | 31.683 | 12/21/2010 01:01:01 | 33.612 |
| 4/26/2010 17:03:00 | 26.0 | 12/2/2010 16:44:01 | 31.184 | 12/21/2010 01:37:01 | 34.110 |
| 4/26/2010 17:38:00 | 26.5 | 12/2/2010 17:04:01 | 29.874 | 12/21/2010 02:13:01 | 34.110 |
| 4/26/2010 18:13:00 | 26.5 | 12/2/2010 17:24:01 | 29.125 | 12/21/2010 02:49:01 | 34.110 |
| 4/26/2010 18:48:00 | 26.5 | 12/2/2010 17:44:01 | 28.813 | 12/21/2010 03:25:01 | 34.110 |
| 4/26/2010 19:23:00 | 26.5 | 12/2/2010 18:04:01 | 28.376 | 12/21/2010 04:01:01 | 34.110 |
| 4/26/2010 19:58:00 | 26.5 | 12/2/2010 18:24:01 | 27.938 | 12/21/2010 04:37:01 | 34.608 |
| 4/26/2010 20:33:00 | 26.5 | 12/2/2010 18:44:01 | 27.376 | 12/21/2010 05:13:01 | 34.608 |
| 4/26/2010 21:08:00 | 26.5 | 12/2/2010 19:04:01 | 26.564 | 12/21/2010 05:49:01 | 34.110 |
| 4/26/2010 21:43:00 | 26.5 | 12/2/2010 19:24:01 | 24.564 | 12/21/2010 06:25:01 | 34.608 |
| 4/26/2010 22:18:00 | 26.5 | 12/2/2010 19:44:01 | 24.064 | 12/21/2010 07:01:01 | 34.608 |
| 4/26/2010 22:53:00 | 26.5 | 12/2/2010 20:04:01 | 23.877 | 12/21/2010 07:37:01 | 34.608 |
| 4/26/2010 23:28:00 | 26.5 | 12/2/2010 20:24:01 | 23.814 | 12/21/2010 08:13:01 | 34.110 |
| 4/27/2010 00:03:00 | 26.5 | 12/2/2010 20:44:01 | 23.814 | 12/21/2010 08:49:01 | 33.612 |
| 4/27/2010 00:38:00 | 26.5 | 12/2/2010 21:04:01 | 23.752 | 12/21/2010 09:25:01 | 33.612 |
| 4/27/2010 01:13:00 | 26.5 | 12/2/2010 21:24:01 | 23.689 | 12/21/2010 10:01:01 | 33.113 |
| 4/27/2010 01:48:00 | 26.5 | 12/2/2010 21:44:01 | 23.564 | 12/21/2010 10:37:01 | 33.113 |
| 4/27/2010 02:23:00 | 26.5 | 12/2/2010 22:04:01 | 23.439 | 12/21/2010 11:13:01 | 33.113 |
| 4/27/2010 02:58:00 | 26.5 | 12/2/2010 22:24:01 | 23.314 | 12/21/2010 11:49:01 | 33.113 |
| 4/27/2010 03:33:00 | 26.5 | 12/2/2010 22:44:01 | 23.126 | 12/21/2010 12:25:01 | 32.116 |
| 4/27/2010 04:08:00 | 26.5 | 12/2/2010 23:04:01 | 23.189 | 12/21/2010 13:01:01 | 32.116 |
| 4/27/2010 04:43:00 | 26.5 | 12/2/2010 23:24:01 | 23.376 | 12/21/2010 13:37:01 | 32.615 |
| 4/27/2010 05:18:00 | 26.0 | 12/2/2010 23:44:01 | 23.439 | 12/21/2010 14:13:01 | 32.615 |
| 4/27/2010 05:53:00 | 26.0 | 12/3/2010 00:04:01 | 23.251 | 12/21/2010 14:49:01 | 32.615 |
| 4/27/2010 06:28:00 | 26.0 | 12/3/2010 00:24:01 | 23.126 | 12/21/2010 15:25:01 | 33.612 |
| 4/27/2010 07:03:00 | 26.0 | 12/3/2010 00:44:01 | 23.189 | 12/21/2010 16:01:01 | 33.612 |
| 4/27/2010 07:38:00 | 26.0 | 12/3/2010 01:04:01 | 23.126 | 12/21/2010 16:37:01 | 34.110 |
| 4/27/2010 08:13:00 | 26.0 | 12/3/2010 01:24:01 | 22.939 | 12/21/2010 17:13:01 | 34.110 |
| 4/27/2010 08:48:00 | 26.0 | 12/3/2010 01:44:01 | 23.126 | 12/21/2010 17:49:01 | 35.107 |
| 4/27/2010 09:23:00 | 26.0 | 12/3/2010 02:04:01 | 23.314 | 12/21/2010 18:25:01 | 35.107 |
| 4/27/2010 09:58:00 | 26.0 | 12/3/2010 02:24:01 | 23.376 | 12/21/2010 19:01:01 | 35.107 |
| 4/27/2010 10:33:00 | 26.0 | 12/3/2010 02:44:01 | 23.501 | 12/21/2010 19:37:01 | 34.608 |
| 4/27/2010 11:08:00 | 26.0 | 12/3/2010 03:04:01 | 23.564 | 12/21/2010 20:13:01 | 34.110 |
| 4/27/2010 11:43:00 | 26.0 | 12/3/2010 03:24:01 | 23.564 | 12/21/2010 20:49:01 | 34.110 |
| 4/27/2010 12:18:00 | 26.0 | 12/3/2010 03:44:01 | 23.564 | 12/21/2010 21:25:01 | 34.110 |
| 4/27/2010 12:53:00 | 26.0 | 12/3/2010 04:04:01 | 23.439 | 12/21/2010 22:01:01 | 33.612 |
| 4/27/2010 13:28:00 | 26.0 | 12/3/2010 04:24:01 | 23.501 | 12/21/2010 22:37:01 | 33.113 |
| 4/27/2010 14:03:00 | 26.0 | 12/3/2010 04:44:01 | 23.501 | 12/21/2010 23:13:01 | 32.615 |
| 4/27/2010 14:38:00 | 26.0 | 12/3/2010 05:04:01 | 23.439 | 12/21/2010 23:49:01 | 32.615 |
| 4/27/2010 15:13:00 | 26.0 | 12/3/2010 05:24:01 | 23.376 | 12/22/2010 00:25:01 | 32.615 |
| 4/27/2010 15:48:00 | 26.0 | 12/3/2010 05:44:01 | 23.627 | 12/22/2010 01:01:01 | 32.615 |
| 4/27/2010 16:23:00 | 26.0 | 12/3/2010 06:04:01 | 24.002 | 12/22/2010 01:37:01 | 32.116 |



|                    |      |                    |        |                     |        |
|--------------------|------|--------------------|--------|---------------------|--------|
| 4/27/2010 16:58:00 | 26.0 | 12/3/2010 06:24:01 | 23.939 | 12/22/2010 02:13:01 | 31.617 |
| 4/27/2010 17:33:00 | 26.0 | 12/3/2010 06:44:01 | 24.064 | 12/22/2010 02:49:01 | 32.615 |
| 4/27/2010 18:08:00 | 26.5 | 12/3/2010 07:04:01 | 24.189 | 12/22/2010 03:25:01 | 33.612 |
| 4/27/2010 18:43:00 | 26.5 | 12/3/2010 07:24:01 | 24.439 | 12/22/2010 04:01:01 | 34.110 |
| 4/27/2010 19:18:00 | 26.5 | 12/3/2010 07:44:01 | 24.752 | 12/22/2010 04:37:01 | 34.110 |
| 4/27/2010 19:53:00 | 26.5 | 12/3/2010 08:04:01 | 24.877 | 12/22/2010 05:13:01 | 34.110 |
| 4/27/2010 20:28:00 | 26.5 | 12/3/2010 08:24:01 | 25.252 | 12/22/2010 05:49:01 | 34.110 |
| 4/27/2010 21:03:00 | 26.5 | 12/3/2010 08:44:01 | 25.752 | 12/22/2010 06:25:01 | 34.110 |
| 4/27/2010 21:38:00 | 26.5 | 12/3/2010 09:04:01 | 26.502 | 12/22/2010 07:01:01 | 34.110 |
| 4/27/2010 22:13:00 | 26.5 | 12/3/2010 09:24:01 | 27.189 | 12/22/2010 07:37:01 | 34.608 |
| 4/27/2010 22:48:00 | 26.5 | 12/3/2010 09:44:01 | 28.063 | 12/22/2010 08:13:01 | 34.608 |
| 4/27/2010 23:23:00 | 26.5 | 12/3/2010 10:04:01 | 29.187 | 12/22/2010 08:49:01 | 34.608 |
| 4/27/2010 23:58:00 | 26.5 | 12/3/2010 10:24:01 | 30.123 | 12/22/2010 09:25:01 | 34.110 |
| 4/28/2010 00:33:00 | 26.5 | 12/3/2010 10:44:01 | 30.935 | 12/22/2010 10:01:01 | 34.110 |
| 4/28/2010 01:08:00 | 26.5 | 12/3/2010 11:04:01 | 31.683 | 12/22/2010 10:37:01 | 34.110 |
| 4/28/2010 01:43:00 | 26.5 | 12/3/2010 11:24:01 | 31.933 | 12/22/2010 11:13:01 | 34.110 |
| 4/28/2010 02:18:00 | 26.5 | 12/3/2010 11:44:01 | 31.933 | 12/22/2010 11:49:01 | 33.612 |
| 4/28/2010 02:53:00 | 26.5 | 12/3/2010 12:04:01 | 32.182 | 12/22/2010 12:25:01 | 33.612 |
| 4/28/2010 03:28:00 | 26.5 | 12/3/2010 12:24:01 | 32.931 | 12/22/2010 13:01:01 | 33.612 |
| 4/28/2010 04:03:00 | 26.5 | 12/3/2010 12:44:01 | 32.369 | 12/22/2010 13:37:01 | 34.110 |
| 4/28/2010 04:38:00 | 26.5 | 12/3/2010 13:04:01 | 33.118 | 12/22/2010 14:13:01 | 34.110 |
| 4/28/2010 05:13:00 | 26.0 | 12/3/2010 13:24:01 | 34.925 | 12/22/2010 14:49:01 | 34.110 |
| 4/28/2010 05:48:00 | 26.0 | 12/3/2010 13:44:01 | 36.047 | 12/22/2010 15:25:01 | 34.608 |
| 4/28/2010 06:23:00 | 26.0 | 12/3/2010 14:04:01 | 34.863 | 12/22/2010 16:01:01 | 34.608 |
| 4/28/2010 06:58:00 | 26.0 | 12/3/2010 14:24:01 | 33.679 | 12/22/2010 16:37:01 | 34.608 |
| 4/28/2010 07:33:00 | 26.0 | 12/3/2010 14:44:01 | 33.741 | 12/22/2010 17:13:01 | 35.107 |
| 4/28/2010 08:08:00 | 26.0 | 12/3/2010 15:04:01 | 33.429 | 12/22/2010 17:49:01 | 35.107 |
| 4/28/2010 08:43:00 | 26.0 | 12/3/2010 15:24:01 | 33.118 | 12/22/2010 18:25:01 | 35.107 |
| 4/28/2010 09:18:00 | 26.0 | 12/3/2010 15:44:01 | 32.619 | 12/22/2010 19:01:01 | 35.107 |
| 4/28/2010 09:53:00 | 26.0 | 12/3/2010 16:04:01 | 32.494 | 12/22/2010 19:37:01 | 34.608 |
| 4/28/2010 10:28:00 | 26.0 | 12/3/2010 16:24:01 | 32.556 | 12/22/2010 20:13:01 | 34.110 |
| 4/28/2010 11:03:00 | 26.0 | 12/3/2010 16:44:01 | 32.307 | 12/22/2010 20:49:01 | 33.612 |
| 4/28/2010 11:38:00 | 26.0 | 12/3/2010 17:04:01 | 32.120 | 12/22/2010 21:25:01 | 33.612 |
| 4/28/2010 12:13:00 | 26.0 | 12/3/2010 17:24:01 | 31.434 | 12/22/2010 22:01:01 | 33.113 |
| 4/28/2010 12:48:00 | 26.0 | 12/3/2010 17:44:01 | 30.498 | 12/22/2010 22:37:01 | 33.113 |
| 4/28/2010 13:23:00 | 26.0 | 12/3/2010 18:04:01 | 29.374 | 12/22/2010 23:13:01 | 33.612 |
| 4/28/2010 13:58:00 | 26.0 | 12/3/2010 18:24:01 | 28.188 | 12/22/2010 23:49:01 | 33.612 |
| 4/28/2010 14:33:00 | 26.0 | 12/3/2010 18:44:01 | 27.189 | 12/23/2010 00:25:01 | 33.612 |
| 4/28/2010 15:08:00 | 26.0 | 12/3/2010 19:04:01 | 26.439 | 12/23/2010 01:01:01 | 34.110 |
| 4/28/2010 15:43:00 | 26.0 | 12/3/2010 19:24:01 | 25.689 | 12/23/2010 01:37:01 | 34.110 |
| 4/28/2010 16:18:00 | 26.5 | 12/3/2010 19:44:01 | 25.189 | 12/23/2010 02:13:01 | 34.110 |
| 4/28/2010 16:53:00 | 26.5 | 12/3/2010 20:04:01 | 24.752 | 12/23/2010 02:49:01 | 34.110 |
| 4/28/2010 17:28:00 | 26.5 | 12/3/2010 20:24:01 | 24.502 | 12/23/2010 03:25:01 | 34.110 |
| 4/28/2010 18:03:00 | 26.5 | 12/3/2010 20:44:01 | 24.189 | 12/23/2010 04:01:01 | 34.608 |
| 4/28/2010 18:38:00 | 26.5 | 12/3/2010 21:04:01 | 23.939 | 12/23/2010 04:37:01 | 34.110 |
| 4/28/2010 19:13:00 | 26.5 | 12/3/2010 21:24:01 | 23.689 | 12/23/2010 05:13:01 | 34.110 |
| 4/28/2010 19:48:00 | 26.5 | 12/3/2010 21:44:01 | 23.564 | 12/23/2010 05:49:01 | 34.110 |
| 4/28/2010 20:23:00 | 26.5 | 12/3/2010 22:04:01 | 23.564 | 12/23/2010 06:25:01 | 34.608 |
| 4/28/2010 20:58:00 | 26.5 | 12/3/2010 22:24:01 | 23.376 | 12/23/2010 07:01:01 | 34.608 |
| 4/28/2010 21:33:00 | 26.5 | 12/3/2010 22:44:01 | 23.251 | 12/23/2010 07:37:01 | 35.107 |

|                    |      |                    |        |                     |        |
|--------------------|------|--------------------|--------|---------------------|--------|
| 4/28/2010 22:08:00 | 26.5 | 12/3/2010 23:04:01 | 23.126 | 12/23/2010 08:13:01 | 34.608 |
| 4/28/2010 22:43:00 | 26.5 | 12/3/2010 23:24:01 | 22.939 | 12/23/2010 08:49:01 | 34.608 |
| 4/28/2010 23:18:00 | 26.5 | 12/3/2010 23:44:01 | 22.751 | 12/23/2010 09:25:01 | 35.107 |
| 4/28/2010 23:53:00 | 26.5 | 12/4/2010 00:04:01 | 22.626 | 12/23/2010 10:01:01 | 35.107 |
| 4/29/2010 00:28:00 | 26.5 | 12/4/2010 00:24:01 | 22.438 | 12/23/2010 10:37:01 | 34.110 |
| 4/29/2010 01:03:00 | 26.5 | 12/4/2010 00:44:01 | 22.438 | 12/23/2010 11:13:01 | 34.110 |
| 4/29/2010 01:38:00 | 26.5 | 12/4/2010 01:04:01 | 22.563 | 12/23/2010 11:49:01 | 33.612 |
| 4/29/2010 02:13:00 | 26.5 | 12/4/2010 01:24:01 | 22.751 | 12/23/2010 12:25:01 | 33.612 |
| 4/29/2010 02:48:00 | 26.5 | 12/4/2010 01:44:01 | 22.876 | 12/23/2010 13:01:01 | 33.612 |
| 4/29/2010 03:23:00 | 26.5 | 12/4/2010 02:04:01 | 22.876 | 12/23/2010 13:37:01 | 33.113 |
| 4/29/2010 03:58:00 | 26.5 | 12/4/2010 02:24:01 | 22.814 | 12/23/2010 14:13:01 | 33.612 |
| 4/29/2010 04:33:00 | 26.5 | 12/4/2010 02:44:01 | 23.001 | 12/23/2010 14:49:01 | 33.612 |
| 4/29/2010 05:08:00 | 26.5 | 12/4/2010 03:04:01 | 23.001 | 12/23/2010 15:25:01 | 33.612 |
| 4/29/2010 05:43:00 | 26.5 | 12/4/2010 03:24:01 | 23.439 | 12/23/2010 16:01:01 | 33.612 |
| 4/29/2010 06:18:00 | 26.5 | 12/4/2010 03:44:01 | 23.439 | 12/23/2010 16:37:01 | 34.110 |
| 4/29/2010 06:53:00 | 26.5 | 12/4/2010 04:04:01 | 23.564 | 12/23/2010 17:13:01 | 34.608 |
| 4/29/2010 07:28:00 | 26.0 | 12/4/2010 04:24:01 | 23.564 | 12/23/2010 17:49:01 | 35.107 |
| 4/29/2010 08:03:00 | 26.0 | 12/4/2010 04:44:01 | 23.564 | 12/23/2010 18:25:01 | 35.107 |
| 4/29/2010 08:38:00 | 26.0 | 12/4/2010 05:04:01 | 23.627 | 12/23/2010 19:01:01 | 34.608 |
| 4/29/2010 09:13:00 | 26.0 | 12/4/2010 05:24:01 | 23.752 | 12/23/2010 19:37:01 | 34.608 |
| 4/29/2010 09:48:00 | 26.0 | 12/4/2010 05:44:01 | 23.877 | 12/23/2010 20:13:01 | 34.608 |
| 4/29/2010 10:23:00 | 26.0 | 12/4/2010 06:04:01 | 24.064 | 12/23/2010 20:49:01 | 33.612 |
| 4/29/2010 10:58:00 | 26.0 | 12/4/2010 06:24:01 | 24.377 | 12/23/2010 21:25:01 | 33.612 |
| 4/29/2010 11:33:00 | 26.0 | 12/4/2010 06:44:01 | 25.064 | 12/23/2010 22:01:01 | 33.612 |
| 4/29/2010 12:08:00 | 26.0 | 12/4/2010 07:04:01 | 25.502 | 12/23/2010 22:37:01 | 33.113 |
| 4/29/2010 12:43:00 | 26.0 | 12/4/2010 07:24:01 | 26.189 | 12/23/2010 23:13:01 | 33.113 |
| 4/29/2010 13:18:00 | 26.0 | 12/4/2010 07:44:01 | 26.627 | 12/23/2010 23:49:01 | 33.113 |
| 4/29/2010 13:53:00 | 26.0 | 12/4/2010 08:04:01 | 27.689 | 12/24/2010 00:25:01 | 33.612 |
| 4/29/2010 14:28:00 | 26.0 | 12/4/2010 08:24:01 | 29.811 | 12/24/2010 01:01:01 | 34.110 |
| 4/29/2010 15:03:00 | 26.0 | 12/4/2010 08:44:01 | 30.373 | 12/24/2010 01:37:01 | 33.113 |
| 4/29/2010 15:38:00 | 26.0 | 12/4/2010 09:04:01 | 30.872 | 12/24/2010 02:13:01 | 32.615 |
| 4/29/2010 16:13:00 | 26.0 | 12/4/2010 09:24:01 | 32.245 | 12/24/2010 02:49:01 | 32.615 |
| 4/29/2010 16:48:00 | 26.0 | 12/4/2010 09:44:01 | 34.240 | 12/24/2010 03:25:01 | 32.615 |
| 4/29/2010 17:23:00 | 26.0 | 12/4/2010 10:04:01 | 34.551 | 12/24/2010 04:01:01 | 32.116 |
| 4/29/2010 17:58:00 | 26.0 | 12/4/2010 10:24:01 | 34.988 | 12/24/2010 04:37:01 | 32.116 |
| 4/29/2010 18:33:00 | 26.0 | 12/4/2010 10:44:01 | 35.548 | 12/24/2010 05:13:01 | 31.617 |
| 4/29/2010 19:08:00 | 26.5 | 12/4/2010 11:04:01 | 35.922 | 12/24/2010 05:49:01 | 32.116 |
| 4/29/2010 19:43:00 | 26.5 | 12/4/2010 11:24:01 | 35.922 | 12/24/2010 06:25:01 | 33.113 |
| 4/29/2010 20:18:00 | 26.5 | 12/4/2010 11:44:01 | 36.171 | 12/24/2010 07:01:01 | 33.612 |
| 4/29/2010 20:53:00 | 26.5 | 12/4/2010 12:04:01 | 36.358 | 12/24/2010 07:37:01 | 34.110 |
| 4/29/2010 21:28:00 | 26.5 | 12/4/2010 12:24:01 | 37.106 | 12/24/2010 08:13:01 | 34.608 |
| 4/29/2010 22:03:00 | 26.5 | 12/4/2010 12:44:01 | 36.794 | 12/24/2010 08:49:01 | 34.110 |
| 4/29/2010 22:38:00 | 26.5 | 12/4/2010 13:04:01 | 37.168 | 12/24/2010 09:25:01 | 34.110 |
| 4/29/2010 23:13:00 | 26.5 | 12/4/2010 13:24:01 | 37.853 | 12/24/2010 10:01:01 | 33.612 |
| 4/29/2010 23:48:00 | 26.0 | 12/4/2010 13:44:01 | 37.604 | 12/24/2010 10:37:01 | 33.612 |
| 4/30/2010 00:23:00 | 26.0 | 12/4/2010 14:04:01 | 38.040 | 12/24/2010 11:13:01 | 34.110 |
| 4/30/2010 00:58:00 | 26.0 | 12/4/2010 14:24:01 | 38.040 | 12/24/2010 11:49:01 | 34.608 |
| 4/30/2010 01:33:00 | 26.0 | 12/4/2010 14:44:01 | 37.417 | 12/24/2010 12:25:01 | 34.608 |
| 4/30/2010 02:08:00 | 26.5 | 12/4/2010 15:04:01 | 35.860 | 12/24/2010 13:01:01 | 34.110 |
| 4/30/2010 02:43:00 | 26.5 | 12/4/2010 15:24:01 | 35.175 | 12/24/2010 13:37:01 | 33.612 |

|                    |      |                    |        |                     |        |
|--------------------|------|--------------------|--------|---------------------|--------|
| 4/30/2010 03:18:00 | 26.5 | 12/4/2010 15:44:01 | 34.551 | 12/24/2010 14:13:01 | 34.110 |
| 4/30/2010 03:53:00 | 26.0 | 12/4/2010 16:04:01 | 34.053 | 12/24/2010 14:49:01 | 34.110 |
| 4/30/2010 04:28:00 | 26.0 | 12/4/2010 16:24:01 | 33.429 | 12/24/2010 15:25:01 | 34.110 |
| 4/30/2010 05:03:00 | 26.0 | 12/4/2010 16:44:01 | 32.619 | 12/24/2010 16:01:01 | 34.608 |
| 4/30/2010 05:38:00 | 26.0 | 12/4/2010 17:04:01 | 31.434 | 12/24/2010 16:37:01 | 34.608 |
| 4/30/2010 06:13:00 | 26.0 | 12/4/2010 17:24:01 | 30.311 | 12/24/2010 17:13:01 | 34.608 |
| 4/30/2010 06:48:00 | 26.0 | 12/4/2010 17:44:01 | 29.125 | 12/24/2010 17:49:01 | 34.608 |
| 4/30/2010 07:23:00 | 26.0 | 12/4/2010 18:04:01 | 27.938 | 12/24/2010 18:25:01 | 34.608 |
| 4/30/2010 07:58:00 | 26.0 | 12/4/2010 18:24:01 | 26.939 | 12/24/2010 19:01:01 | 34.608 |
| 4/30/2010 08:33:00 | 26.0 | 12/4/2010 18:44:01 | 26.002 | 12/24/2010 19:37:01 | 34.608 |
| 4/30/2010 09:08:00 | 26.0 | 12/4/2010 19:04:01 | 25.189 | 12/24/2010 20:13:01 | 34.110 |
| 4/30/2010 09:43:00 | 26.0 | 12/4/2010 19:24:01 | 24.377 | 12/24/2010 20:49:01 | 34.110 |
| 4/30/2010 10:18:00 | 26.0 | 12/4/2010 19:44:01 | 23.814 | 12/24/2010 21:25:01 | 33.113 |
| 4/30/2010 10:53:00 | 26.0 | 12/4/2010 20:04:01 | 23.689 | 12/24/2010 22:01:01 | 32.615 |
| 4/30/2010 11:28:00 | 26.0 | 12/4/2010 20:24:01 | 23.752 | 12/24/2010 22:37:01 | 33.113 |
| 4/30/2010 12:03:00 | 26.0 | 12/4/2010 20:44:01 | 23.689 | 12/24/2010 23:13:01 | 33.113 |
| 4/30/2010 12:38:00 | 26.0 | 12/4/2010 21:04:01 | 23.439 | 12/24/2010 23:49:01 | 33.113 |
| 4/30/2010 13:13:00 | 26.0 | 12/4/2010 21:24:01 | 23.251 | 12/25/2010 00:25:01 | 33.113 |
| 4/30/2010 13:48:00 | 26.0 | 12/4/2010 21:44:01 | 23.126 | 12/25/2010 01:01:01 | 33.113 |
| 4/30/2010 14:23:00 | 26.0 | 12/4/2010 22:04:01 | 23.001 | 12/25/2010 01:37:01 | 32.615 |
| 4/30/2010 14:58:00 | 26.0 | 12/4/2010 22:24:01 | 22.751 | 12/25/2010 02:13:01 | 32.615 |
| 4/30/2010 15:33:00 | 26.0 | 12/4/2010 22:44:01 | 22.688 | 12/25/2010 02:49:01 | 32.615 |
| 4/30/2010 16:08:00 | 26.0 | 12/4/2010 23:04:01 | 22.688 | 12/25/2010 03:25:01 | 33.113 |
| 4/30/2010 16:43:00 | 26.0 | 12/4/2010 23:24:01 | 22.438 | 12/25/2010 04:01:01 | 32.615 |
| 4/30/2010 17:18:00 | 26.0 | 12/4/2010 23:44:01 | 22.188 | 12/25/2010 04:37:01 | 32.615 |
| 4/30/2010 17:53:00 | 26.0 | 12/5/2010 00:04:01 | 22.000 | 12/25/2010 05:13:01 | 32.615 |
| 4/30/2010 18:28:00 | 26.0 | 12/5/2010 00:24:01 | 21.750 | 12/25/2010 05:49:01 | 32.615 |
| 4/30/2010 19:03:00 | 26.0 | 12/5/2010 00:44:01 | 21.500 | 12/25/2010 06:25:01 | 33.113 |
| 4/30/2010 19:38:00 | 26.0 | 12/5/2010 01:04:01 | 21.500 | 12/25/2010 07:01:01 | 34.110 |
| 4/30/2010 20:13:00 | 26.0 | 12/5/2010 01:24:01 | 21.562 | 12/25/2010 07:37:01 | 34.110 |
| 4/30/2010 20:48:00 | 26.0 | 12/5/2010 01:44:01 | 21.562 | 12/25/2010 08:13:01 | 33.612 |
| 4/30/2010 21:23:00 | 26.0 | 12/5/2010 02:04:01 | 21.813 | 12/25/2010 08:49:01 | 33.113 |
| 4/30/2010 21:58:00 | 26.0 | 12/5/2010 02:24:01 | 21.875 | 12/25/2010 09:25:01 | 33.612 |
| 4/30/2010 22:33:00 | 26.0 | 12/5/2010 02:44:01 | 21.750 | 12/25/2010 10:01:01 | 34.110 |
| 4/30/2010 23:08:00 | 26.0 | 12/5/2010 03:04:01 | 21.500 | 12/25/2010 10:37:01 | 34.110 |
| 4/30/2010 23:43:00 | 26.0 | 12/5/2010 03:24:01 | 21.312 | 12/25/2010 11:13:01 | 35.107 |
| 5/1/2010 00:18:00  | 26.0 | 12/5/2010 03:44:01 | 21.437 | 12/25/2010 11:49:01 | 34.608 |
| 5/1/2010 00:53:00  | 26.0 | 12/5/2010 04:04:01 | 21.562 | 12/25/2010 12:25:01 | 34.608 |
| 5/1/2010 01:28:00  | 26.0 | 12/5/2010 04:24:01 | 21.938 | 12/25/2010 13:01:01 | 34.110 |
| 5/1/2010 02:03:00  | 26.0 | 12/5/2010 04:44:01 | 22.188 | 12/25/2010 13:37:01 | 33.612 |
| 5/1/2010 02:38:00  | 26.0 | 12/5/2010 05:04:01 | 22.251 | 12/25/2010 14:13:01 | 33.612 |
| 5/1/2010 03:13:00  | 26.0 | 12/5/2010 05:24:01 | 22.313 | 12/25/2010 14:49:01 | 34.110 |
| 5/1/2010 03:48:00  | 26.0 | 12/5/2010 05:44:01 | 22.376 | 12/25/2010 15:25:01 | 34.110 |
| 5/1/2010 04:23:00  | 26.0 | 12/5/2010 06:04:01 | 22.876 | 12/25/2010 16:01:01 | 34.608 |
| 5/1/2010 04:58:00  | 26.0 | 12/5/2010 06:24:01 | 23.814 | 12/25/2010 16:37:01 | 34.608 |
| 5/1/2010 05:33:00  | 26.0 | 12/5/2010 06:44:01 | 24.877 | 12/25/2010 17:13:01 | 34.608 |
| 5/1/2010 06:08:00  | 26.0 | 12/5/2010 07:04:01 | 26.064 | 12/25/2010 17:49:01 | 34.110 |
| 5/1/2010 06:43:00  | 26.0 | 12/5/2010 07:24:01 | 27.751 | 12/25/2010 18:25:01 | 34.110 |
| 5/1/2010 07:18:00  | 26.0 | 12/5/2010 07:44:01 | 29.374 | 12/25/2010 19:01:01 | 34.608 |
| 5/1/2010 07:53:00  | 26.0 | 12/5/2010 08:04:01 | 30.373 | 12/25/2010 19:37:01 | 35.107 |

|                   |      |                    |        |                     |        |
|-------------------|------|--------------------|--------|---------------------|--------|
| 5/1/2010 08:28:00 | 26.0 | 12/5/2010 08:24:01 | 28.813 | 12/25/2010 20:13:01 | 35.107 |
| 5/1/2010 09:03:00 | 26.0 | 12/5/2010 08:44:01 | 28.438 | 12/25/2010 20:49:01 | 35.107 |
| 5/1/2010 09:38:00 | 26.0 | 12/5/2010 09:04:01 | 28.813 | 12/25/2010 21:25:01 | 34.110 |
| 5/1/2010 10:13:00 | 26.0 | 12/5/2010 09:24:01 | 30.311 | 12/25/2010 22:01:01 | 33.612 |
| 5/1/2010 10:48:00 | 26.0 | 12/5/2010 09:44:01 | 31.558 | 12/25/2010 22:37:01 | 33.113 |
| 5/1/2010 11:23:00 | 26.0 | 12/5/2010 10:04:01 | 31.122 | 12/25/2010 23:13:01 | 33.612 |
| 5/1/2010 11:58:00 | 26.0 | 12/5/2010 10:24:01 | 34.115 | 12/25/2010 23:49:01 | 33.113 |
| 5/1/2010 12:33:00 | 26.0 | 12/5/2010 10:44:01 | 35.299 | 12/26/2010 00:25:01 | 33.612 |
| 5/1/2010 13:08:00 | 26.0 | 12/5/2010 11:04:01 | 33.367 | 12/26/2010 01:01:01 | 33.612 |
| 5/1/2010 13:43:00 | 26.0 | 12/5/2010 11:24:01 | 34.115 | 12/26/2010 01:37:01 | 32.615 |
| 5/1/2010 14:18:00 | 26.0 | 12/5/2010 11:44:01 | 33.429 | 12/26/2010 02:13:01 | 33.113 |
| 5/1/2010 14:53:00 | 26.0 | 12/5/2010 12:04:01 | 35.611 | 12/26/2010 02:49:01 | 32.116 |
| 5/1/2010 15:28:00 | 26.0 | 12/5/2010 12:24:01 | 36.171 | 12/26/2010 03:25:01 | 31.617 |
| 5/1/2010 16:03:00 | 26.0 | 12/5/2010 12:44:01 | 37.541 | 12/26/2010 04:01:01 | 31.617 |
| 5/1/2010 16:38:00 | 26.0 | 12/5/2010 13:04:01 | 37.915 | 12/26/2010 04:37:01 | 31.118 |
| 5/1/2010 17:13:00 | 26.0 | 12/5/2010 13:24:01 | 39.098 | 12/26/2010 05:13:01 | 30.619 |
| 5/1/2010 17:48:00 | 26.0 | 12/5/2010 13:44:01 | 38.040 | 12/26/2010 05:49:01 | 30.619 |
| 5/1/2010 18:23:00 | 26.5 | 12/5/2010 14:04:01 | 39.284 | 12/26/2010 06:25:01 | 30.120 |
| 5/1/2010 18:58:00 | 26.5 | 12/5/2010 14:24:01 | 39.409 | 12/26/2010 07:01:01 | 30.120 |
| 5/1/2010 19:33:00 | 26.5 | 12/5/2010 14:44:01 | 38.475 | 12/26/2010 07:37:01 | 30.120 |
| 5/1/2010 20:08:00 | 26.5 | 12/5/2010 15:04:01 | 36.732 | 12/26/2010 08:13:01 | 29.621 |
| 5/1/2010 20:43:00 | 26.5 | 12/5/2010 15:24:01 | 36.047 | 12/26/2010 08:49:01 | 30.120 |
| 5/1/2010 21:18:00 | 26.5 | 12/5/2010 15:44:01 | 35.361 | 12/26/2010 09:25:01 | 31.617 |
| 5/1/2010 21:53:00 | 26.5 | 12/5/2010 16:04:01 | 34.925 | 12/26/2010 10:01:01 | 32.615 |
| 5/1/2010 22:28:00 | 26.5 | 12/5/2010 16:24:01 | 34.427 | 12/26/2010 10:37:01 | 33.113 |
| 5/1/2010 23:03:00 | 26.5 | 12/5/2010 16:44:01 | 33.616 | 12/26/2010 11:13:01 | 33.113 |
| 5/1/2010 23:38:00 | 26.5 | 12/5/2010 17:04:01 | 32.619 | 12/26/2010 11:49:01 | 33.612 |
| 5/2/2010 00:13:00 | 26.5 | 12/5/2010 17:24:01 | 31.309 | 12/26/2010 12:25:01 | 33.612 |
| 5/2/2010 00:48:00 | 26.5 | 12/5/2010 17:44:01 | 29.999 | 12/26/2010 13:01:01 | 33.612 |
| 5/2/2010 01:23:00 | 26.5 | 12/5/2010 18:04:01 | 29.312 | 12/26/2010 13:37:01 | 33.612 |
| 5/2/2010 01:58:00 | 26.5 | 12/5/2010 18:24:01 | 29.437 | 12/26/2010 14:13:01 | 33.612 |
| 5/2/2010 02:33:00 | 26.5 | 12/5/2010 18:44:01 | 28.813 | 12/26/2010 14:49:01 | 33.612 |
| 5/2/2010 03:08:00 | 26.5 | 12/5/2010 19:04:01 | 28.188 | 12/26/2010 15:25:01 | 34.110 |
| 5/2/2010 03:43:00 | 26.5 | 12/5/2010 19:24:01 | 27.689 | 12/26/2010 16:01:01 | 33.612 |
| 5/2/2010 04:18:00 | 26.5 | 12/5/2010 19:44:01 | 27.376 | 12/26/2010 16:37:01 | 33.612 |
| 5/2/2010 04:53:00 | 26.5 | 12/5/2010 20:04:01 | 27.064 | 12/26/2010 17:13:01 | 34.608 |
| 5/2/2010 05:28:00 | 26.5 | 12/5/2010 20:24:01 | 26.752 | 12/26/2010 17:49:01 | 33.612 |
| 5/2/2010 06:03:00 | 26.5 | 12/5/2010 20:44:01 | 26.314 | 12/26/2010 18:25:01 | 33.113 |
| 5/2/2010 06:38:00 | 26.5 | 12/5/2010 21:04:01 | 25.752 | 12/26/2010 19:01:01 | 33.612 |
| 5/2/2010 07:13:00 | 26.0 | 12/5/2010 21:24:01 | 25.252 | 12/26/2010 19:37:01 | 33.612 |
| 5/2/2010 07:48:00 | 26.0 | 12/5/2010 21:44:01 | 24.814 | 12/26/2010 20:13:01 | 33.113 |
| 5/2/2010 08:23:00 | 26.0 | 12/5/2010 22:04:01 | 24.502 | 12/26/2010 20:49:01 | 33.113 |
| 5/2/2010 08:58:00 | 26.0 | 12/5/2010 22:24:01 | 24.252 | 12/26/2010 21:25:01 | 32.615 |
| 5/2/2010 09:33:00 | 26.0 | 12/5/2010 22:44:01 | 23.939 | 12/26/2010 22:01:01 | 32.116 |
| 5/2/2010 10:08:00 | 26.0 | 12/5/2010 23:04:01 | 23.939 | 12/26/2010 22:37:01 | 31.118 |
| 5/2/2010 10:43:00 | 26.0 | 12/5/2010 23:24:01 | 23.689 | 12/26/2010 23:13:01 | 30.619 |
| 5/2/2010 11:18:00 | 26.0 | 12/5/2010 23:44:01 | 23.314 | 12/26/2010 23:49:01 | 30.120 |
| 5/2/2010 11:53:00 | 26.0 | 12/6/2010 00:04:01 | 23.064 | 12/27/2010 00:25:01 | 30.120 |
| 5/2/2010 12:28:00 | 26.0 | 12/6/2010 00:24:01 | 22.939 | 12/27/2010 01:01:01 | 29.621 |
| 5/2/2010 13:03:00 | 26.5 |                    |        | 12/27/2010 01:37:01 | 29.621 |

|                   |      |                     |        |
|-------------------|------|---------------------|--------|
| 5/2/2010 13:38:00 | 26.5 | 12/27/2010 02:13:01 | 29.122 |
| 5/2/2010 14:13:00 | 26.5 | 12/27/2010 02:49:01 | 29.122 |
| 5/2/2010 14:48:00 | 26.5 | 12/27/2010 03:25:01 | 29.122 |
| 5/2/2010 15:23:00 | 26.5 | 12/27/2010 04:01:01 | 29.122 |
| 5/2/2010 15:58:00 | 26.5 | 12/27/2010 04:37:01 | 28.623 |
| 5/2/2010 16:33:00 | 26.5 | 12/27/2010 05:13:01 | 28.623 |
| 5/2/2010 17:08:00 | 26.5 | 12/27/2010 05:49:01 | 28.623 |
| 5/2/2010 17:43:00 | 26.5 | 12/27/2010 06:25:01 | 28.623 |
| 5/2/2010 18:18:00 | 26.5 | 12/27/2010 07:01:01 | 28.123 |
| 5/2/2010 18:53:00 | 26.5 | 12/27/2010 07:37:01 | 28.623 |
| 5/2/2010 19:28:00 | 26.5 | 12/27/2010 08:13:01 | 29.122 |
| 5/2/2010 20:03:00 | 26.5 | 12/27/2010 08:49:01 | 28.623 |
| 5/2/2010 20:38:00 | 26.5 | 12/27/2010 09:25:01 | 28.623 |
| 5/2/2010 21:13:00 | 26.5 | 12/27/2010 10:01:01 | 28.623 |
| 5/2/2010 21:48:00 | 26.5 | 12/27/2010 10:37:01 | 28.623 |
| 5/2/2010 22:23:00 | 26.5 | 12/27/2010 11:13:01 | 28.623 |
| 5/2/2010 22:58:00 | 26.5 | 12/27/2010 11:49:01 | 28.623 |
| 5/2/2010 23:33:00 | 26.5 | 12/27/2010 12:25:01 | 28.623 |
| 5/3/2010 00:08:00 | 26.5 | 12/27/2010 13:01:01 | 28.623 |
| 5/3/2010 00:43:00 | 26.5 | 12/27/2010 13:37:01 | 28.623 |
| 5/3/2010 01:18:00 | 26.5 | 12/27/2010 14:13:01 | 28.623 |
| 5/3/2010 01:53:00 | 26.5 | 12/27/2010 14:49:01 | 28.623 |
| 5/3/2010 02:28:00 | 26.5 | 12/27/2010 15:25:01 | 28.123 |
| 5/3/2010 03:03:00 | 26.5 | 12/27/2010 16:01:01 | 28.123 |
| 5/3/2010 03:38:00 | 26.5 | 12/27/2010 16:37:01 | 28.123 |
| 5/3/2010 04:13:00 | 26.5 | 12/27/2010 17:13:01 | 28.123 |
| 5/3/2010 04:48:00 | 26.5 | 12/27/2010 17:49:01 | 28.123 |
| 5/3/2010 05:23:00 | 26.5 | 12/27/2010 18:25:01 | 28.123 |
| 5/3/2010 05:58:00 | 26.5 | 12/27/2010 19:01:01 | 28.623 |
| 5/3/2010 06:33:00 | 26.5 | 12/27/2010 19:37:01 | 29.122 |
| 5/3/2010 07:08:00 | 26.5 | 12/27/2010 20:13:01 | 29.122 |
| 5/3/2010 07:43:00 | 26.5 | 12/27/2010 20:49:01 | 29.122 |
| 5/3/2010 08:18:00 | 26.5 | 12/27/2010 21:25:01 | 29.122 |
| 5/3/2010 08:53:00 | 26.0 | 12/27/2010 22:01:01 | 28.623 |
| 5/3/2010 09:28:00 | 26.0 | 12/27/2010 22:37:01 | 28.623 |
| 5/3/2010 10:03:00 | 26.0 | 12/27/2010 23:13:01 | 28.623 |
| 5/3/2010 10:38:00 | 26.0 | 12/27/2010 23:49:01 | 28.623 |
| 5/3/2010 11:13:00 | 26.0 | 12/28/2010 00:25:01 | 28.623 |
| 5/3/2010 11:48:00 | 26.0 | 12/28/2010 01:01:01 | 29.122 |
| 5/3/2010 12:23:00 | 26.0 | 12/28/2010 01:37:01 | 28.623 |
| 5/3/2010 12:58:00 | 26.0 | 12/28/2010 02:13:01 | 28.123 |
| 5/3/2010 13:33:00 | 26.0 | 12/28/2010 02:49:01 | 28.123 |
| 5/3/2010 14:08:00 | 26.0 | 12/28/2010 03:25:01 | 28.123 |
| 5/3/2010 14:43:00 | 26.5 | 12/28/2010 04:01:01 | 28.123 |
| 5/3/2010 15:18:00 | 26.5 | 12/28/2010 04:37:01 | 28.123 |
| 5/3/2010 15:53:00 | 26.5 | 12/28/2010 05:13:01 | 28.123 |
| 5/3/2010 16:28:00 | 26.5 | 12/28/2010 05:49:01 | 27.624 |
| 5/3/2010 17:03:00 | 26.5 | 12/28/2010 06:25:01 | 27.624 |
| 5/3/2010 17:38:00 | 26.5 | 12/28/2010 07:01:01 | 27.624 |
| 5/3/2010 18:13:00 | 26.5 | 12/28/2010 07:37:01 | 27.624 |

|                   |      |                     |        |
|-------------------|------|---------------------|--------|
| 5/3/2010 18:48:00 | 26.5 | 12/28/2010 08:13:01 | 27.624 |
| 5/3/2010 19:23:00 | 26.5 | 12/28/2010 08:49:01 | 27.624 |
| 5/3/2010 19:58:00 | 26.5 | 12/28/2010 09:25:01 | 27.624 |
| 5/3/2010 20:33:00 | 26.5 | 12/28/2010 10:01:01 | 27.624 |
| 5/3/2010 21:08:00 | 26.5 | 12/28/2010 10:37:01 | 27.624 |
| 5/3/2010 21:43:00 | 26.5 | 12/28/2010 11:13:01 | 27.624 |
| 5/3/2010 22:18:00 | 26.5 | 12/28/2010 11:49:01 | 27.624 |
| 5/3/2010 22:53:00 | 26.5 | 12/28/2010 12:25:01 | 27.124 |
| 5/3/2010 23:28:00 | 26.5 | 12/28/2010 13:01:01 | 27.124 |
| 5/4/2010 00:03:00 | 26.5 | 12/28/2010 13:37:01 | 27.124 |
| 5/4/2010 00:38:00 | 26.5 | 12/28/2010 14:13:01 | 27.124 |
| 5/4/2010 01:13:00 | 26.5 | 12/28/2010 14:49:01 | 27.624 |
| 5/4/2010 01:48:00 | 26.5 | 12/28/2010 15:25:01 | 27.624 |
| 5/4/2010 02:23:00 | 26.5 | 12/28/2010 16:01:01 | 27.624 |
| 5/4/2010 02:58:00 | 26.5 | 12/28/2010 16:37:01 | 27.624 |
| 5/4/2010 03:33:00 | 26.5 | 12/28/2010 17:13:01 | 27.624 |
| 5/4/2010 04:08:00 | 26.5 | 12/28/2010 17:49:01 | 28.123 |
| 5/4/2010 04:43:00 | 26.5 | 12/28/2010 18:25:01 | 28.123 |
| 5/4/2010 05:18:00 | 26.5 | 12/28/2010 19:01:01 | 28.123 |
| 5/4/2010 05:53:00 | 26.5 | 12/28/2010 19:37:01 | 27.624 |
| 5/4/2010 06:28:00 | 26.5 | 12/28/2010 20:13:01 | 27.624 |
| 5/4/2010 07:03:00 | 26.5 | 12/28/2010 20:49:01 | 27.624 |
| 5/4/2010 07:38:00 | 26.5 | 12/28/2010 21:25:01 | 27.624 |
| 5/4/2010 08:13:00 | 26.5 | 12/28/2010 22:01:01 | 27.624 |
| 5/4/2010 08:48:00 | 26.5 | 12/28/2010 22:37:01 | 27.624 |
| 5/4/2010 09:23:00 | 26.5 | 12/28/2010 23:13:01 | 27.624 |
| 5/4/2010 09:58:00 | 26.5 | 12/28/2010 23:49:01 | 27.624 |
| 5/4/2010 10:33:00 | 26.5 | 12/29/2010 00:25:01 | 27.624 |
| 5/4/2010 11:08:00 | 26.5 | 12/29/2010 01:01:01 | 27.624 |
| 5/4/2010 11:43:00 | 26.5 | 12/29/2010 01:37:01 | 27.624 |
| 5/4/2010 12:18:00 | 26.5 | 12/29/2010 02:13:01 | 27.624 |
| 5/4/2010 12:53:00 | 26.5 | 12/29/2010 02:49:01 | 27.624 |
| 5/4/2010 13:28:00 | 26.5 | 12/29/2010 03:25:01 | 27.624 |
| 5/4/2010 14:03:00 | 26.5 | 12/29/2010 04:01:01 | 27.624 |
| 5/4/2010 14:38:00 | 26.5 | 12/29/2010 04:37:01 | 27.624 |
| 5/4/2010 15:13:00 | 26.5 | 12/29/2010 05:13:01 | 27.624 |
| 5/4/2010 15:48:00 | 26.5 | 12/29/2010 05:49:01 | 27.624 |
| 5/4/2010 16:23:00 | 26.5 | 12/29/2010 06:25:01 | 27.624 |
| 5/4/2010 16:58:00 | 26.5 | 12/29/2010 07:01:01 | 27.624 |
| 5/4/2010 17:33:00 | 26.5 | 12/29/2010 07:37:01 | 27.624 |
| 5/4/2010 18:08:00 | 26.5 | 12/29/2010 08:13:01 | 27.624 |
| 5/4/2010 18:43:00 | 26.5 | 12/29/2010 08:49:01 | 27.624 |
| 5/4/2010 19:18:00 | 26.5 | 12/29/2010 09:25:01 | 27.624 |
| 5/4/2010 19:53:00 | 26.5 | 12/29/2010 10:01:01 | 27.624 |
| 5/4/2010 20:28:00 | 26.5 | 12/29/2010 10:37:01 | 27.624 |
| 5/4/2010 21:03:00 | 26.5 | 12/29/2010 11:13:01 | 27.624 |
| 5/4/2010 21:38:00 | 26.5 | 12/29/2010 11:49:01 | 27.624 |
| 5/4/2010 22:13:00 | 26.5 | 12/29/2010 12:25:01 | 27.624 |
| 5/4/2010 22:48:00 | 26.5 | 12/29/2010 13:01:01 | 27.624 |
| 5/4/2010 23:23:00 | 26.5 | 12/29/2010 13:37:01 | 27.624 |

|                   |      |                     |        |
|-------------------|------|---------------------|--------|
| 5/4/2010 23:58:00 | 26.5 | 12/29/2010 14:13:01 | 27.624 |
| 5/5/2010 00:33:00 | 26.5 | 12/29/2010 14:49:01 | 27.624 |
| 5/5/2010 01:08:00 | 26.5 | 12/29/2010 15:25:01 | 27.624 |
| 5/5/2010 01:43:00 | 26.5 | 12/29/2010 16:01:01 | 27.624 |
| 5/5/2010 02:18:00 | 26.5 | 12/29/2010 16:37:01 | 27.624 |
| 5/5/2010 02:53:00 | 26.5 | 12/29/2010 17:13:01 | 27.624 |
| 5/5/2010 03:28:00 | 26.5 | 12/29/2010 17:49:01 | 28.623 |
| 5/5/2010 04:03:00 | 26.5 | 12/29/2010 18:25:01 | 29.621 |
| 5/5/2010 04:38:00 | 26.5 | 12/29/2010 19:01:01 | 30.120 |
| 5/5/2010 05:13:00 | 26.5 | 12/29/2010 19:37:01 | 30.619 |
| 5/5/2010 05:48:00 | 26.5 | 12/29/2010 20:13:01 | 30.619 |
| 5/5/2010 06:23:00 | 26.5 | 12/29/2010 20:49:01 | 30.619 |
| 5/5/2010 06:58:00 | 26.5 | 12/29/2010 21:25:01 | 30.619 |
| 5/5/2010 07:33:00 | 26.5 | 12/29/2010 22:01:01 | 30.619 |
| 5/5/2010 08:08:00 | 26.5 | 12/29/2010 22:37:01 | 30.120 |
| 5/5/2010 08:43:00 | 26.5 | 12/29/2010 23:13:01 | 29.621 |
| 5/5/2010 09:18:00 | 26.5 | 12/29/2010 23:49:01 | 29.122 |
| 5/5/2010 09:53:00 | 26.5 | 12/30/2010 00:25:01 | 29.122 |
| 5/5/2010 10:28:00 | 26.5 | 12/30/2010 01:01:01 | 28.623 |
| 5/5/2010 11:03:00 | 26.5 | 12/30/2010 01:37:01 | 28.623 |
| 5/5/2010 11:38:00 | 26.5 | 12/30/2010 02:13:01 | 28.123 |
| 5/5/2010 12:13:00 | 26.0 | 12/30/2010 02:49:01 | 28.123 |
| 5/5/2010 12:48:00 | 26.5 | 12/30/2010 03:25:01 | 28.123 |
| 5/5/2010 13:23:00 | 26.5 | 12/30/2010 04:01:01 | 28.123 |
| 5/5/2010 13:58:00 | 26.5 | 12/30/2010 04:37:01 | 27.624 |
| 5/5/2010 14:33:00 | 26.5 | 12/30/2010 05:13:01 | 27.624 |
| 5/5/2010 15:08:00 | 26.5 | 12/30/2010 05:49:01 | 27.624 |
| 5/5/2010 15:43:00 | 26.5 | 12/30/2010 06:25:01 | 27.624 |
| 5/5/2010 16:18:00 | 26.5 | 12/30/2010 07:01:01 | 27.624 |
| 5/5/2010 16:53:00 | 26.5 | 12/30/2010 07:37:01 | 27.624 |
| 5/5/2010 17:28:00 | 26.5 | 12/30/2010 08:13:01 | 27.624 |
| 5/5/2010 18:03:00 | 26.5 | 12/30/2010 08:49:01 | 27.124 |
| 5/5/2010 18:38:00 | 26.5 | 12/30/2010 09:25:01 | 27.124 |
| 5/5/2010 19:13:00 | 26.5 | 12/30/2010 10:01:01 | 27.124 |
| 5/5/2010 19:48:00 | 26.5 | 12/30/2010 10:37:01 | 27.124 |
| 5/5/2010 20:23:00 | 26.5 | 12/30/2010 11:13:01 | 27.124 |
| 5/5/2010 20:58:00 | 26.5 | 12/30/2010 11:49:01 | 27.124 |
| 5/5/2010 21:33:00 | 26.5 | 12/30/2010 12:25:01 | 27.124 |
| 5/5/2010 22:08:00 | 26.5 | 12/30/2010 13:01:01 | 27.124 |
| 5/5/2010 22:43:00 | 26.5 | 12/30/2010 13:37:01 | 27.124 |
| 5/5/2010 23:18:00 | 26.5 | 12/30/2010 14:13:01 | 27.124 |
| 5/5/2010 23:53:00 | 26.5 | 12/30/2010 14:49:01 | 27.124 |
| 5/6/2010 00:28:00 | 26.5 | 12/30/2010 15:25:01 | 27.124 |
| 5/6/2010 01:03:00 | 26.5 | 12/30/2010 16:01:01 | 27.124 |
| 5/6/2010 01:38:00 | 26.5 | 12/30/2010 16:37:01 | 27.124 |
| 5/6/2010 02:13:00 | 26.5 | 12/30/2010 17:13:01 | 27.124 |
| 5/6/2010 02:48:00 | 26.5 | 12/30/2010 17:49:01 | 27.124 |
| 5/6/2010 03:23:00 | 26.5 | 12/30/2010 18:25:01 | 27.124 |
| 5/6/2010 03:58:00 | 26.5 | 12/30/2010 19:01:01 | 27.124 |
| 5/6/2010 04:33:00 | 26.5 | 12/30/2010 19:37:01 | 27.124 |

|                   |      |                     |        |
|-------------------|------|---------------------|--------|
| 5/6/2010 05:08:00 | 26.5 | 12/30/2010 20:13:01 | 27.124 |
| 5/6/2010 05:43:00 | 26.5 | 12/30/2010 20:49:01 | 27.624 |
| 5/6/2010 06:18:00 | 26.5 | 12/30/2010 21:25:01 | 27.624 |
| 5/6/2010 06:53:00 | 26.5 | 12/30/2010 22:01:01 | 27.624 |
| 5/6/2010 07:28:00 | 26.5 | 12/30/2010 22:37:01 | 27.624 |
| 5/6/2010 08:03:00 | 26.5 | 12/30/2010 23:13:01 | 27.624 |
| 5/6/2010 08:38:00 | 26.5 | 12/30/2010 23:49:01 | 27.624 |
| 5/6/2010 09:13:00 | 26.5 | 12/31/2010 00:25:01 | 27.124 |
| 5/6/2010 09:48:00 | 26.5 | 12/31/2010 01:01:01 | 27.124 |
| 5/6/2010 10:23:00 | 26.5 | 12/31/2010 01:37:01 | 27.124 |
| 5/6/2010 10:58:00 | 26.0 | 12/31/2010 02:13:01 | 27.124 |
| 5/6/2010 11:33:00 | 26.5 | 12/31/2010 02:49:01 | 27.124 |
| 5/6/2010 12:08:00 | 26.5 | 12/31/2010 03:25:01 | 27.124 |
| 5/6/2010 12:43:00 | 26.5 | 12/31/2010 04:01:01 | 27.624 |
| 5/6/2010 13:18:00 | 26.5 | 12/31/2010 04:37:01 | 27.624 |
| 5/6/2010 13:53:00 | 26.5 | 12/31/2010 05:13:01 | 27.124 |
| 5/6/2010 14:28:00 | 26.5 | 12/31/2010 05:49:01 | 27.624 |
| 5/6/2010 15:03:00 | 26.5 | 12/31/2010 06:25:01 | 27.624 |
| 5/6/2010 15:38:00 | 26.5 | 12/31/2010 07:01:01 | 27.624 |
| 5/6/2010 16:13:00 | 26.5 | 12/31/2010 07:37:01 | 27.624 |
| 5/6/2010 16:48:00 | 26.5 | 12/31/2010 08:13:01 | 27.624 |
| 5/6/2010 17:23:00 | 26.5 | 12/31/2010 08:49:01 | 27.124 |
| 5/6/2010 17:58:00 | 26.5 | 12/31/2010 09:25:01 | 27.124 |
| 5/6/2010 18:33:00 | 26.5 | 12/31/2010 10:01:01 | 27.124 |
| 5/6/2010 19:08:00 | 26.5 | 12/31/2010 10:37:01 | 27.124 |
| 5/6/2010 19:43:00 | 26.5 | 12/31/2010 11:13:01 | 27.124 |
| 5/6/2010 20:18:00 | 26.5 | 12/31/2010 11:49:01 | 27.124 |
| 5/6/2010 20:53:00 | 26.5 | 12/31/2010 12:25:01 | 27.124 |
| 5/6/2010 21:28:00 | 26.5 | 12/31/2010 13:01:01 | 27.124 |
| 5/6/2010 22:03:00 | 26.5 | 12/31/2010 13:37:01 | 27.124 |
| 5/6/2010 22:38:00 | 26.5 | 12/31/2010 14:13:01 | 27.124 |
| 5/6/2010 23:13:00 | 26.5 | 12/31/2010 14:49:01 | 27.124 |
| 5/6/2010 23:48:00 | 26.5 | 12/31/2010 15:25:01 | 27.124 |
| 5/7/2010 00:23:00 | 26.5 | 12/31/2010 16:01:01 | 27.124 |
| 5/7/2010 00:58:00 | 26.5 | 12/31/2010 16:37:01 | 27.124 |
| 5/7/2010 01:33:00 | 26.5 | 12/31/2010 17:13:01 | 27.124 |
| 5/7/2010 02:08:00 | 26.5 | 12/31/2010 17:49:01 | 27.124 |
| 5/7/2010 02:43:00 | 26.5 | 12/31/2010 18:25:01 | 27.124 |
| 5/7/2010 03:18:00 | 26.5 | 12/31/2010 19:01:01 | 27.624 |
| 5/7/2010 03:53:00 | 26.5 | 12/31/2010 19:37:01 | 27.124 |
| 5/7/2010 04:28:00 | 26.0 | 12/31/2010 20:13:01 | 27.624 |
| 5/7/2010 05:03:00 | 26.0 | 12/31/2010 20:49:01 | 28.123 |
| 5/7/2010 05:38:00 | 26.0 | 12/31/2010 21:25:01 | 28.123 |
| 5/7/2010 06:13:00 | 26.0 | 12/31/2010 22:01:01 | 28.123 |
| 5/7/2010 06:48:00 | 26.0 | 12/31/2010 22:37:01 | 27.624 |
| 5/7/2010 07:23:00 | 26.0 | 12/31/2010 23:13:01 | 28.123 |
| 5/7/2010 07:58:00 | 26.0 | 12/31/2010 23:49:01 | 27.624 |
| 5/7/2010 08:33:00 | 26.0 | 1/1/2011 00:25:01   | 27.624 |
| 5/7/2010 09:08:00 | 26.0 | 1/1/2011 01:01:01   | 27.624 |
| 5/7/2010 09:43:00 | 26.0 | 1/1/2011 01:37:01   | 27.624 |



|                   |      |                   |        |
|-------------------|------|-------------------|--------|
| 5/7/2010 10:18:00 | 26.0 | 1/1/2011 02:13:01 | 27.624 |
| 5/7/2010 10:53:00 | 26.0 | 1/1/2011 02:49:01 | 27.624 |
| 5/7/2010 11:28:00 | 26.0 | 1/1/2011 03:25:01 | 27.624 |
| 5/7/2010 12:03:00 | 26.0 | 1/1/2011 04:01:01 | 27.624 |
| 5/7/2010 12:38:00 | 26.0 | 1/1/2011 04:37:01 | 27.624 |
| 5/7/2010 13:13:00 | 26.0 | 1/1/2011 05:13:01 | 27.124 |
| 5/7/2010 13:48:00 | 26.0 | 1/1/2011 05:49:01 | 27.624 |
| 5/7/2010 14:23:00 | 26.0 | 1/1/2011 06:25:01 | 27.624 |
| 5/7/2010 14:58:00 | 26.0 | 1/1/2011 07:01:01 | 27.624 |
| 5/7/2010 15:33:00 | 26.0 | 1/1/2011 07:37:01 | 27.124 |
| 5/7/2010 16:08:00 | 26.0 | 1/1/2011 08:13:01 | 27.624 |
| 5/7/2010 16:43:00 | 26.0 | 1/1/2011 08:49:01 | 27.124 |
| 5/7/2010 17:18:00 | 26.0 | 1/1/2011 09:25:01 | 27.124 |
| 5/7/2010 17:53:00 | 26.0 | 1/1/2011 10:01:01 | 27.124 |
| 5/7/2010 18:28:00 | 26.0 | 1/1/2011 10:37:01 | 27.124 |
| 5/7/2010 19:03:00 | 26.0 | 1/1/2011 11:13:01 | 27.124 |
| 5/7/2010 19:38:00 | 26.0 | 1/1/2011 11:49:01 | 27.124 |
| 5/7/2010 20:13:00 | 26.0 | 1/1/2011 12:25:01 | 27.124 |
| 5/7/2010 20:48:00 | 26.0 | 1/1/2011 13:01:01 | 27.124 |
| 5/7/2010 21:23:00 | 26.0 | 1/1/2011 13:37:01 | 27.124 |
| 5/7/2010 21:58:00 | 26.0 | 1/1/2011 14:13:01 | 27.124 |
| 5/7/2010 22:33:00 | 26.0 | 1/1/2011 14:49:01 | 27.124 |
| 5/7/2010 23:08:00 | 26.0 | 1/1/2011 15:25:01 | 27.124 |
| 5/7/2010 23:43:00 | 26.0 | 1/1/2011 16:01:01 | 27.124 |
| 5/8/2010 00:18:00 | 26.0 | 1/1/2011 16:37:01 | 27.124 |
| 5/8/2010 00:53:00 | 26.0 | 1/1/2011 17:13:01 | 27.124 |
| 5/8/2010 01:28:00 | 26.0 | 1/1/2011 17:49:01 | 27.624 |
| 5/8/2010 02:03:00 | 26.0 | 1/1/2011 18:25:01 | 27.624 |
| 5/8/2010 02:38:00 | 26.0 | 1/1/2011 19:01:01 | 27.624 |
| 5/8/2010 03:13:00 | 26.0 | 1/1/2011 19:37:01 | 27.124 |
| 5/8/2010 03:48:00 | 26.0 | 1/1/2011 20:13:01 | 27.124 |
| 5/8/2010 04:23:00 | 26.0 | 1/1/2011 20:49:01 | 27.124 |
| 5/8/2010 04:58:00 | 26.0 | 1/1/2011 21:25:01 | 27.124 |
| 5/8/2010 05:33:00 | 26.0 | 1/1/2011 22:01:01 | 27.124 |
| 5/8/2010 06:08:00 | 26.0 | 1/1/2011 22:37:01 | 27.624 |
| 5/8/2010 06:43:00 | 26.0 | 1/1/2011 23:13:01 | 27.624 |
| 5/8/2010 07:18:00 | 26.0 | 1/1/2011 23:49:01 | 27.124 |
| 5/8/2010 07:53:00 | 26.0 | 1/2/2011 00:25:01 | 27.124 |
| 5/8/2010 08:28:00 | 26.0 | 1/2/2011 01:01:01 | 27.124 |
| 5/8/2010 09:03:00 | 26.0 | 1/2/2011 01:37:01 | 27.124 |
| 5/8/2010 09:38:00 | 26.0 | 1/2/2011 02:13:01 | 27.624 |
| 5/8/2010 10:13:00 | 26.0 | 1/2/2011 02:49:01 | 27.624 |
| 5/8/2010 10:48:00 | 25.5 | 1/2/2011 03:25:01 | 27.624 |
| 5/8/2010 11:23:00 | 25.5 | 1/2/2011 04:01:01 | 27.624 |
| 5/8/2010 11:58:00 | 25.5 | 1/2/2011 04:37:01 | 27.624 |
| 5/8/2010 12:33:00 | 26.0 | 1/2/2011 05:13:01 | 27.124 |
| 5/8/2010 13:08:00 | 26.0 | 1/2/2011 05:49:01 | 27.124 |
| 5/8/2010 13:43:00 | 25.5 | 1/2/2011 06:25:01 | 27.124 |
| 5/8/2010 14:18:00 | 25.5 | 1/2/2011 07:01:01 | 27.124 |
| 5/8/2010 14:53:00 | 26.0 | 1/2/2011 07:37:01 | 27.624 |

|                   |      |                   |        |
|-------------------|------|-------------------|--------|
| 5/8/2010 15:28:00 | 26.0 | 1/2/2011 08:13:01 | 27.624 |
| 5/8/2010 16:03:00 | 26.0 | 1/2/2011 08:49:01 | 27.624 |
| 5/8/2010 16:38:00 | 26.0 | 1/2/2011 09:25:01 | 27.624 |
| 5/8/2010 17:13:00 | 26.0 | 1/2/2011 10:01:01 | 27.624 |
| 5/8/2010 17:48:00 | 26.0 | 1/2/2011 10:37:01 | 27.624 |
| 5/8/2010 18:23:00 | 26.0 | 1/2/2011 11:13:01 | 27.624 |
| 5/8/2010 18:58:00 | 26.0 | 1/2/2011 11:49:01 | 27.624 |
| 5/8/2010 19:33:00 | 26.0 | 1/2/2011 12:25:01 | 27.624 |
| 5/8/2010 20:08:00 | 26.0 | 1/2/2011 13:01:01 | 27.124 |
| 5/8/2010 20:43:00 | 26.5 | 1/2/2011 13:37:01 | 27.124 |
| 5/8/2010 21:18:00 | 26.0 | 1/2/2011 14:13:01 | 27.124 |
| 5/8/2010 21:53:00 | 26.0 | 1/2/2011 14:49:01 | 27.124 |
| 5/8/2010 22:28:00 | 26.0 | 1/2/2011 15:25:01 | 27.124 |
| 5/8/2010 23:03:00 | 26.0 | 1/2/2011 16:01:01 | 27.124 |
| 5/8/2010 23:38:00 | 26.0 | 1/2/2011 16:37:01 | 27.124 |
| 5/9/2010 00:13:00 | 26.0 | 1/2/2011 17:13:01 | 27.124 |
| 5/9/2010 00:48:00 | 26.0 | 1/2/2011 17:49:01 | 27.124 |
| 5/9/2010 01:23:00 | 26.0 | 1/2/2011 18:25:01 | 27.124 |
| 5/9/2010 01:58:00 | 26.0 | 1/2/2011 19:01:01 | 27.124 |
| 5/9/2010 02:33:00 | 26.0 | 1/2/2011 19:37:01 | 27.124 |
| 5/9/2010 03:08:00 | 26.0 | 1/2/2011 20:13:01 | 27.124 |
| 5/9/2010 03:43:00 | 25.5 | 1/2/2011 20:49:01 | 27.124 |
| 5/9/2010 04:18:00 | 25.5 | 1/2/2011 21:25:01 | 27.124 |
| 5/9/2010 04:53:00 | 25.5 | 1/2/2011 22:01:01 | 27.124 |
| 5/9/2010 05:28:00 | 25.5 | 1/2/2011 22:37:01 | 27.124 |
| 5/9/2010 06:03:00 | 25.5 | 1/2/2011 23:13:01 | 27.124 |
| 5/9/2010 06:38:00 | 25.5 | 1/2/2011 23:49:01 | 27.124 |
| 5/9/2010 07:13:00 | 25.5 | 1/3/2011 00:25:01 | 27.124 |
| 5/9/2010 07:48:00 | 25.5 | 1/3/2011 01:01:01 | 27.124 |
| 5/9/2010 08:23:00 | 25.5 | 1/3/2011 01:37:01 | 27.124 |
| 5/9/2010 08:58:00 | 25.5 | 1/3/2011 02:13:01 | 28.123 |
| 5/9/2010 09:33:00 | 25.5 | 1/3/2011 02:49:01 | 28.123 |
| 5/9/2010 10:08:00 | 25.5 | 1/3/2011 03:25:01 | 28.123 |
| 5/9/2010 10:43:00 | 25.5 | 1/3/2011 04:01:01 | 28.123 |
| 5/9/2010 11:18:00 | 25.5 | 1/3/2011 04:37:01 | 28.123 |
| 5/9/2010 11:53:00 | 25.5 | 1/3/2011 05:13:01 | 27.624 |
| 5/9/2010 12:28:00 | 25.5 | 1/3/2011 05:49:01 | 27.624 |
| 5/9/2010 13:03:00 | 25.5 | 1/3/2011 06:25:01 | 27.624 |
| 5/9/2010 13:38:00 | 25.5 | 1/3/2011 07:01:01 | 27.624 |
| 5/9/2010 14:13:00 | 25.5 | 1/3/2011 07:37:01 | 27.624 |
| 5/9/2010 14:48:00 | 25.5 | 1/3/2011 08:13:01 | 27.624 |
| 5/9/2010 15:23:00 | 25.5 | 1/3/2011 08:49:01 | 27.624 |
| 5/9/2010 15:58:00 | 25.5 | 1/3/2011 09:25:01 | 27.624 |
| 5/9/2010 16:33:00 | 25.5 | 1/3/2011 10:01:01 | 27.624 |
| 5/9/2010 17:08:00 | 26.0 | 1/3/2011 10:37:01 | 27.624 |
| 5/9/2010 17:43:00 | 26.0 | 1/3/2011 11:13:01 | 27.624 |
| 5/9/2010 18:18:00 | 26.0 | 1/3/2011 11:49:01 | 27.124 |
| 5/9/2010 18:53:00 | 26.0 | 1/3/2011 12:25:01 | 27.124 |
| 5/9/2010 19:28:00 | 26.0 | 1/3/2011 13:01:01 | 27.124 |
| 5/9/2010 20:03:00 | 26.0 | 1/3/2011 13:37:01 | 27.124 |

|                    |      |                   |        |
|--------------------|------|-------------------|--------|
| 5/9/2010 20:38:00  | 26.0 | 1/3/2011 14:13:01 | 27.124 |
| 5/9/2010 21:13:00  | 26.0 | 1/3/2011 14:49:01 | 27.124 |
| 5/9/2010 21:48:00  | 26.0 | 1/3/2011 15:25:01 | 27.624 |
| 5/9/2010 22:23:00  | 26.0 | 1/3/2011 16:01:01 | 27.124 |
| 5/9/2010 22:58:00  | 26.0 | 1/3/2011 16:37:01 | 27.124 |
| 5/9/2010 23:33:00  | 26.0 | 1/3/2011 17:13:01 | 27.124 |
| 5/10/2010 00:08:00 | 26.0 | 1/3/2011 17:49:01 | 27.124 |
| 5/10/2010 00:43:00 | 26.0 | 1/3/2011 18:25:01 | 27.124 |
| 5/10/2010 01:18:00 | 26.0 | 1/3/2011 19:01:01 | 27.624 |
| 5/10/2010 01:53:00 | 26.0 | 1/3/2011 19:37:01 | 27.124 |
| 5/10/2010 02:28:00 | 26.0 | 1/3/2011 20:13:01 | 27.124 |
| 5/10/2010 03:03:00 | 26.0 | 1/3/2011 20:49:01 | 27.124 |
| 5/10/2010 03:38:00 | 26.0 | 1/3/2011 21:25:01 | 27.124 |
| 5/10/2010 04:13:00 | 26.0 | 1/3/2011 22:01:01 | 27.124 |
| 5/10/2010 04:48:00 | 26.0 | 1/3/2011 22:37:01 | 27.124 |
| 5/10/2010 05:23:00 | 26.0 | 1/3/2011 23:13:01 | 27.124 |
| 5/10/2010 05:58:00 | 26.0 | 1/3/2011 23:49:01 | 27.124 |
| 5/10/2010 06:33:00 | 26.0 | 1/4/2011 00:25:01 | 27.624 |
| 5/10/2010 07:08:00 | 26.0 | 1/4/2011 01:01:01 | 27.124 |
| 5/10/2010 07:43:00 | 26.0 | 1/4/2011 01:37:01 | 27.124 |
| 5/10/2010 08:18:00 | 25.5 | 1/4/2011 02:13:01 | 27.124 |
| 5/10/2010 08:53:00 | 25.5 | 1/4/2011 02:49:01 | 27.624 |
| 5/10/2010 09:28:00 | 25.5 | 1/4/2011 03:25:01 | 28.123 |
| 5/10/2010 10:03:00 | 25.5 | 1/4/2011 04:01:01 | 27.624 |
| 5/10/2010 10:38:00 | 25.5 | 1/4/2011 04:37:01 | 27.624 |
| 5/10/2010 11:13:00 | 25.5 | 1/4/2011 05:13:01 | 27.124 |
| 5/10/2010 11:48:00 | 25.5 | 1/4/2011 05:49:01 | 27.124 |
| 5/10/2010 12:23:00 | 25.5 | 1/4/2011 06:25:01 | 27.124 |
| 5/10/2010 12:58:00 | 25.5 | 1/4/2011 07:01:01 | 27.124 |
| 5/10/2010 13:33:00 | 25.5 | 1/4/2011 07:37:01 | 27.124 |
| 5/10/2010 14:08:00 | 25.5 | 1/4/2011 08:13:01 | 27.124 |
| 5/10/2010 14:43:00 | 25.5 | 1/4/2011 08:49:01 | 27.124 |
| 5/10/2010 15:18:00 | 26.0 | 1/4/2011 09:25:01 | 27.124 |
| 5/10/2010 15:53:00 | 26.0 | 1/4/2011 10:01:01 | 27.124 |
| 5/10/2010 16:28:00 | 26.0 | 1/4/2011 10:37:01 | 27.124 |
| 5/10/2010 17:03:00 | 26.0 | 1/4/2011 11:13:01 | 27.124 |
| 5/10/2010 17:38:00 | 26.0 | 1/4/2011 11:49:01 | 27.124 |
| 5/10/2010 18:13:00 | 26.0 | 1/4/2011 12:25:01 | 27.124 |
| 5/10/2010 18:48:00 | 26.0 | 1/4/2011 13:01:01 | 27.124 |
| 5/10/2010 19:23:00 | 26.0 | 1/4/2011 13:37:01 | 27.124 |
| 5/10/2010 19:58:00 | 26.0 | 1/4/2011 14:13:01 | 27.124 |
| 5/10/2010 20:33:00 | 26.0 | 1/4/2011 14:49:01 | 27.124 |
| 5/10/2010 21:08:00 | 26.0 | 1/4/2011 15:25:01 | 27.124 |
| 5/10/2010 21:43:00 | 26.0 | 1/4/2011 16:01:01 | 27.124 |
| 5/10/2010 22:18:00 | 26.0 | 1/4/2011 16:37:01 | 27.124 |
| 5/10/2010 22:53:00 | 26.0 | 1/4/2011 17:13:01 | 27.124 |
| 5/10/2010 23:28:00 | 26.0 | 1/4/2011 17:49:01 | 27.124 |
| 5/11/2010 00:03:00 | 26.0 | 1/4/2011 18:25:01 | 27.124 |
| 5/11/2010 00:38:00 | 26.0 | 1/4/2011 19:01:01 | 27.124 |
| 5/11/2010 01:13:00 | 26.0 | 1/4/2011 19:37:01 | 27.124 |

|                    |      |                   |        |
|--------------------|------|-------------------|--------|
| 5/11/2010 01:48:00 | 26.0 | 1/4/2011 20:13:01 | 27.124 |
| 5/11/2010 02:23:00 | 26.0 | 1/4/2011 20:49:01 | 27.624 |
| 5/11/2010 02:58:00 | 26.0 | 1/4/2011 21:25:01 | 27.624 |
| 5/11/2010 03:33:00 | 26.0 | 1/4/2011 22:01:01 | 27.624 |
| 5/11/2010 04:08:00 | 26.0 | 1/4/2011 22:37:01 | 27.624 |
| 5/11/2010 04:43:00 | 26.0 | 1/4/2011 23:13:01 | 27.624 |
| 5/11/2010 05:18:00 | 26.0 | 1/4/2011 23:49:01 | 27.624 |
| 5/11/2010 05:53:00 | 26.0 | 1/5/2011 00:25:01 | 27.124 |
| 5/11/2010 06:28:00 | 26.0 | 1/5/2011 01:01:01 | 27.624 |
| 5/11/2010 07:03:00 | 25.5 | 1/5/2011 01:37:01 | 27.624 |
| 5/11/2010 07:38:00 | 25.5 | 1/5/2011 02:13:01 | 27.624 |
| 5/11/2010 08:13:00 | 25.5 | 1/5/2011 02:49:01 | 27.124 |
| 5/11/2010 08:48:00 | 25.5 | 1/5/2011 03:25:01 | 27.124 |
| 5/11/2010 09:23:00 | 25.5 | 1/5/2011 04:01:01 | 27.124 |
| 5/11/2010 09:58:00 | 25.5 | 1/5/2011 04:37:01 | 27.124 |
| 5/11/2010 10:33:00 | 25.5 | 1/5/2011 05:13:01 | 27.124 |
| 5/11/2010 11:08:00 | 25.5 | 1/5/2011 05:49:01 | 27.124 |
| 5/11/2010 11:43:00 | 25.5 | 1/5/2011 06:25:01 | 27.124 |
| 5/11/2010 12:18:00 | 25.5 | 1/5/2011 07:01:01 | 27.124 |
| 5/11/2010 12:53:00 | 25.5 | 1/5/2011 07:37:01 | 26.625 |
| 5/11/2010 13:28:00 | 25.5 | 1/5/2011 08:13:01 | 26.625 |
| 5/11/2010 14:03:00 | 25.5 | 1/5/2011 08:49:01 | 26.625 |
| 5/11/2010 14:38:00 | 25.5 | 1/5/2011 09:25:01 | 26.625 |
| 5/11/2010 15:13:00 | 25.5 | 1/5/2011 10:01:01 | 26.625 |
| 5/11/2010 15:48:00 | 25.5 | 1/5/2011 10:37:01 | 26.625 |
| 5/11/2010 16:23:00 | 25.5 | 1/5/2011 11:13:01 | 26.625 |
| 5/11/2010 16:58:00 | 25.5 | 1/5/2011 11:49:01 | 26.625 |
| 5/11/2010 17:33:00 | 26.0 | 1/5/2011 12:25:01 | 26.625 |
| 5/11/2010 18:08:00 | 26.0 | 1/5/2011 13:01:01 | 26.625 |
| 5/11/2010 18:43:00 | 26.0 | 1/5/2011 13:37:01 | 26.625 |
| 5/11/2010 19:18:00 | 26.0 | 1/5/2011 14:13:01 | 26.625 |
| 5/11/2010 19:53:00 | 26.0 | 1/5/2011 14:49:01 | 26.625 |
| 5/11/2010 20:28:00 | 26.0 | 1/5/2011 15:25:01 | 26.625 |
| 5/11/2010 21:03:00 | 26.0 | 1/5/2011 16:01:01 | 26.625 |
| 5/11/2010 21:38:00 | 26.0 | 1/5/2011 16:37:01 | 26.625 |
| 5/11/2010 22:13:00 | 26.0 | 1/5/2011 17:13:01 | 26.625 |
| 5/11/2010 22:48:00 | 26.0 | 1/5/2011 17:49:01 | 26.625 |
| 5/11/2010 23:23:00 | 26.0 | 1/5/2011 18:25:01 | 26.625 |
| 5/11/2010 23:58:00 | 25.5 | 1/5/2011 19:01:01 | 26.625 |
| 5/12/2010 00:33:00 | 26.0 | 1/5/2011 19:37:01 | 26.625 |
| 5/12/2010 01:08:00 | 25.5 | 1/5/2011 20:13:01 | 26.625 |
| 5/12/2010 01:43:00 | 25.5 | 1/5/2011 20:49:01 | 26.625 |
| 5/12/2010 02:18:00 | 25.5 | 1/5/2011 21:25:01 | 26.625 |
| 5/12/2010 02:53:00 | 25.5 | 1/5/2011 22:01:01 | 26.625 |
| 5/12/2010 03:28:00 | 25.5 | 1/5/2011 22:37:01 | 26.625 |
| 5/12/2010 04:03:00 | 25.5 | 1/5/2011 23:13:01 | 26.625 |
| 5/12/2010 04:38:00 | 25.5 | 1/5/2011 23:49:01 | 26.625 |
| 5/12/2010 05:13:00 | 25.5 | 1/6/2011 00:25:01 | 26.625 |
| 5/12/2010 05:48:00 | 25.5 | 1/6/2011 01:01:01 | 26.625 |
| 5/12/2010 06:23:00 | 25.5 | 1/6/2011 01:37:01 | 26.625 |

|                    |      |                   |        |
|--------------------|------|-------------------|--------|
| 5/12/2010 06:58:00 | 25.5 | 1/6/2011 02:13:01 | 26.625 |
| 5/12/2010 07:33:00 | 25.5 | 1/6/2011 02:49:01 | 26.625 |
| 5/12/2010 08:08:00 | 25.5 | 1/6/2011 03:25:01 | 26.625 |
| 5/12/2010 08:43:00 | 25.5 | 1/6/2011 04:01:01 | 26.625 |
| 5/12/2010 09:18:00 | 25.5 | 1/6/2011 04:37:01 | 26.625 |
| 5/12/2010 09:53:00 | 25.5 | 1/6/2011 05:13:01 | 26.625 |
| 5/12/2010 10:28:00 | 25.5 | 1/6/2011 05:49:01 | 26.625 |
| 5/12/2010 11:03:00 | 25.5 | 1/6/2011 06:25:01 | 26.625 |
| 5/12/2010 11:38:00 | 25.5 | 1/6/2011 07:01:01 | 27.124 |
| 5/12/2010 12:13:00 | 25.5 | 1/6/2011 07:37:01 | 28.123 |
| 5/12/2010 12:48:00 | 25.5 | 1/6/2011 08:13:01 | 28.123 |
| 5/12/2010 13:23:00 | 25.5 | 1/6/2011 08:49:01 | 28.623 |
| 5/12/2010 13:58:00 | 25.5 | 1/6/2011 09:25:01 | 28.123 |
| 5/12/2010 14:33:00 | 25.5 | 1/6/2011 10:01:01 | 28.123 |
| 5/12/2010 15:08:00 | 25.5 | 1/6/2011 10:37:01 | 27.624 |
| 5/12/2010 15:43:00 | 25.5 | 1/6/2011 11:13:01 | 27.624 |
| 5/12/2010 16:18:00 | 25.5 | 1/6/2011 11:49:01 | 27.124 |
| 5/12/2010 16:53:00 | 25.5 | 1/6/2011 12:25:01 | 27.124 |
| 5/12/2010 17:28:00 | 25.5 | 1/6/2011 13:01:01 | 27.124 |
| 5/12/2010 18:03:00 | 26.0 | 1/6/2011 13:37:01 | 27.124 |
| 5/12/2010 18:38:00 | 26.0 | 1/6/2011 14:13:01 | 27.124 |
| 5/12/2010 19:13:00 | 26.0 | 1/6/2011 14:49:01 | 26.625 |
| 5/12/2010 19:48:00 | 26.0 | 1/6/2011 15:25:01 | 26.625 |
| 5/12/2010 20:23:00 | 26.0 | 1/6/2011 16:01:01 | 26.625 |
| 5/12/2010 20:58:00 | 26.0 | 1/6/2011 16:37:01 | 26.625 |
| 5/12/2010 21:33:00 | 26.0 | 1/6/2011 17:13:01 | 26.625 |
| 5/12/2010 22:08:00 | 26.0 | 1/6/2011 17:49:01 | 26.625 |
| 5/12/2010 22:43:00 | 26.0 | 1/6/2011 18:25:01 | 26.625 |
| 5/12/2010 23:18:00 | 26.0 | 1/6/2011 19:01:01 | 26.625 |
| 5/12/2010 23:53:00 | 26.0 | 1/6/2011 19:37:01 | 26.625 |
| 5/13/2010 00:28:00 | 26.0 | 1/6/2011 20:13:01 | 26.625 |
| 5/13/2010 01:03:00 | 26.0 | 1/6/2011 20:49:01 | 26.625 |
| 5/13/2010 01:38:00 | 26.0 | 1/6/2011 21:25:01 | 26.625 |
| 5/13/2010 02:13:00 | 25.5 | 1/6/2011 22:01:01 | 26.625 |
| 5/13/2010 02:48:00 | 25.5 | 1/6/2011 22:37:01 | 26.625 |
| 5/13/2010 03:23:00 | 25.5 | 1/6/2011 23:13:01 | 26.625 |
| 5/13/2010 03:58:00 | 25.5 | 1/6/2011 23:49:01 | 26.625 |
| 5/13/2010 04:33:00 | 25.5 | 1/7/2011 00:25:01 | 26.625 |
| 5/13/2010 05:08:00 | 25.5 | 1/7/2011 01:01:01 | 26.625 |
| 5/13/2010 05:43:00 | 25.5 | 1/7/2011 01:37:01 | 26.625 |
| 5/13/2010 06:18:00 | 25.5 | 1/7/2011 02:13:01 | 26.625 |
| 5/13/2010 06:53:00 | 25.5 | 1/7/2011 02:49:01 | 26.625 |
| 5/13/2010 07:28:00 | 25.5 | 1/7/2011 03:25:01 | 26.625 |
| 5/13/2010 08:03:00 | 25.5 | 1/7/2011 04:01:01 | 26.625 |
| 5/13/2010 08:38:00 | 25.5 | 1/7/2011 04:37:01 | 26.625 |
| 5/13/2010 09:13:00 | 25.5 | 1/7/2011 05:13:01 | 26.625 |
| 5/13/2010 09:48:00 | 25.5 | 1/7/2011 05:49:01 | 26.625 |
| 5/13/2010 10:23:00 | 25.5 | 1/7/2011 06:25:01 | 26.625 |
| 5/13/2010 10:58:00 | 25.5 | 1/7/2011 07:01:01 | 26.625 |
| 5/13/2010 11:33:00 | 25.5 | 1/7/2011 07:37:01 | 26.625 |

|                    |      |                   |        |
|--------------------|------|-------------------|--------|
| 5/13/2010 12:08:00 | 25.5 | 1/7/2011 08:13:01 | 26.625 |
| 5/13/2010 12:43:00 | 25.5 | 1/7/2011 08:49:01 | 26.625 |
| 5/13/2010 13:18:00 | 25.5 | 1/7/2011 09:25:01 | 26.625 |
| 5/13/2010 13:53:00 | 25.5 | 1/7/2011 10:01:01 | 26.625 |
| 5/13/2010 14:28:00 | 25.5 | 1/7/2011 10:37:01 | 26.625 |
| 5/13/2010 15:03:00 | 25.5 | 1/7/2011 11:13:01 | 26.625 |
| 5/13/2010 15:38:00 | 25.5 | 1/7/2011 11:49:01 | 26.625 |
| 5/13/2010 16:13:00 | 25.5 | 1/7/2011 12:25:01 | 26.625 |
| 5/13/2010 16:48:00 | 25.5 | 1/7/2011 13:01:01 | 26.625 |
| 5/13/2010 17:23:00 | 25.5 | 1/7/2011 13:37:01 | 26.625 |
| 5/13/2010 17:58:00 | 25.5 | 1/7/2011 14:13:01 | 26.625 |
| 5/13/2010 18:33:00 | 25.5 | 1/7/2011 14:49:01 | 26.625 |
| 5/13/2010 19:08:00 | 25.5 | 1/7/2011 15:25:01 | 26.625 |
| 5/13/2010 19:43:00 | 25.5 | 1/7/2011 16:01:01 | 26.625 |
| 5/13/2010 20:18:00 | 26.0 | 1/7/2011 16:37:01 | 26.625 |
| 5/13/2010 20:53:00 | 26.0 | 1/7/2011 17:13:01 | 26.625 |
| 5/13/2010 21:28:00 | 26.0 | 1/7/2011 17:49:01 | 26.625 |
| 5/13/2010 22:03:00 | 26.0 | 1/7/2011 18:25:01 | 26.625 |
| 5/13/2010 22:38:00 | 26.0 | 1/7/2011 19:01:01 | 26.625 |
| 5/13/2010 23:13:00 | 25.5 | 1/7/2011 19:37:01 | 26.625 |
| 5/13/2010 23:48:00 | 25.5 | 1/7/2011 20:13:01 | 26.625 |
| 5/14/2010 00:23:00 | 25.5 | 1/7/2011 20:49:01 | 26.625 |
| 5/14/2010 00:58:00 | 25.5 | 1/7/2011 21:25:01 | 26.625 |
| 5/14/2010 01:33:00 | 25.5 | 1/7/2011 22:01:01 | 26.625 |
| 5/14/2010 02:08:00 | 25.5 | 1/7/2011 22:37:01 | 26.625 |
| 5/14/2010 02:43:00 | 25.5 | 1/7/2011 23:13:01 | 26.625 |
| 5/14/2010 03:18:00 | 25.5 | 1/7/2011 23:49:01 | 26.625 |
| 5/14/2010 03:53:00 | 25.5 | 1/8/2011 00:25:01 | 26.625 |
| 5/14/2010 04:28:00 | 25.5 | 1/8/2011 01:01:01 | 26.625 |
| 5/14/2010 05:03:00 | 25.5 | 1/8/2011 01:37:01 | 26.625 |
| 5/14/2010 05:38:00 | 25.5 | 1/8/2011 02:13:01 | 26.625 |
| 5/14/2010 06:13:00 | 25.5 | 1/8/2011 02:49:01 | 26.625 |
| 5/14/2010 06:48:00 | 25.5 | 1/8/2011 03:25:01 | 26.625 |
| 5/14/2010 07:23:00 | 25.5 | 1/8/2011 04:01:01 | 26.625 |
| 5/14/2010 07:58:00 | 25.5 | 1/8/2011 04:37:01 | 26.625 |
| 5/14/2010 08:33:00 | 25.5 | 1/8/2011 05:13:01 | 26.625 |
| 5/14/2010 09:08:00 | 25.5 | 1/8/2011 05:49:01 | 26.625 |
| 5/14/2010 09:43:00 | 25.5 | 1/8/2011 06:25:01 | 26.625 |
| 5/14/2010 10:18:00 | 25.5 | 1/8/2011 07:01:01 | 26.625 |
| 5/14/2010 10:53:00 | 25.5 | 1/8/2011 07:37:01 | 26.625 |
| 5/14/2010 11:28:00 | 25.5 | 1/8/2011 08:13:01 | 26.625 |
| 5/14/2010 12:03:00 | 25.5 | 1/8/2011 08:49:01 | 26.625 |
| 5/14/2010 12:38:00 | 25.5 | 1/8/2011 09:25:01 | 26.625 |
| 5/14/2010 13:13:00 | 25.5 | 1/8/2011 10:01:01 | 26.625 |
| 5/14/2010 13:48:00 | 25.5 | 1/8/2011 10:37:01 | 26.625 |
| 5/14/2010 14:23:00 | 25.5 | 1/8/2011 11:13:01 | 26.625 |
| 5/14/2010 14:58:00 | 25.5 | 1/8/2011 11:49:01 | 26.625 |
| 5/14/2010 15:33:00 | 25.5 | 1/8/2011 12:25:01 | 26.625 |
| 5/14/2010 16:08:00 | 25.5 | 1/8/2011 13:01:01 | 26.625 |
| 5/14/2010 16:43:00 | 25.5 | 1/8/2011 13:37:01 | 26.625 |

|                    |      |                   |        |
|--------------------|------|-------------------|--------|
| 5/14/2010 17:18:00 | 25.5 | 1/8/2011 14:13:01 | 26.625 |
| 5/14/2010 17:53:00 | 25.5 | 1/8/2011 14:49:01 | 26.625 |
| 5/14/2010 18:28:00 | 25.5 | 1/8/2011 15:25:01 | 26.625 |
| 5/14/2010 19:03:00 | 25.5 | 1/8/2011 16:01:01 | 26.625 |
| 5/14/2010 19:38:00 | 25.5 | 1/8/2011 16:37:01 | 26.625 |
| 5/14/2010 20:13:00 | 25.5 | 1/8/2011 17:13:01 | 26.625 |
| 5/14/2010 20:48:00 | 25.5 | 1/8/2011 17:49:01 | 26.625 |
| 5/14/2010 21:23:00 | 25.5 | 1/8/2011 18:25:01 | 26.625 |
| 5/14/2010 21:58:00 | 25.5 | 1/8/2011 19:01:01 | 26.625 |
| 5/14/2010 22:33:00 | 25.5 | 1/8/2011 19:37:01 | 26.625 |
| 5/14/2010 23:08:00 | 25.5 | 1/8/2011 20:13:01 | 26.625 |
| 5/14/2010 23:43:00 | 25.5 | 1/8/2011 20:49:01 | 26.625 |
| 5/15/2010 00:18:00 | 25.5 | 1/8/2011 21:25:01 | 26.625 |
| 5/15/2010 00:53:00 | 25.5 | 1/8/2011 22:01:01 | 26.625 |
| 5/15/2010 01:28:00 | 25.5 | 1/8/2011 22:37:01 | 26.625 |
| 5/15/2010 02:03:00 | 25.5 | 1/8/2011 23:13:01 | 26.625 |
| 5/15/2010 02:38:00 | 25.5 | 1/8/2011 23:49:01 | 26.625 |
| 5/15/2010 03:13:00 | 25.5 | 1/9/2011 00:25:01 | 26.625 |
| 5/15/2010 03:48:00 | 25.5 | 1/9/2011 01:01:01 | 26.625 |
| 5/15/2010 04:23:00 | 25.5 | 1/9/2011 01:37:01 | 26.625 |
| 5/15/2010 04:58:00 | 25.5 | 1/9/2011 02:13:01 | 26.625 |
| 5/15/2010 05:33:00 | 25.5 | 1/9/2011 02:49:01 | 26.625 |
| 5/15/2010 06:08:00 | 25.5 | 1/9/2011 03:25:01 | 26.625 |
| 5/15/2010 06:43:00 | 25.5 | 1/9/2011 04:01:01 | 26.625 |
| 5/15/2010 07:18:00 | 25.5 | 1/9/2011 04:37:01 | 26.625 |
| 5/15/2010 07:53:00 | 25.5 | 1/9/2011 05:13:01 | 26.625 |
| 5/15/2010 08:28:00 | 25.5 | 1/9/2011 05:49:01 | 26.625 |
| 5/15/2010 09:03:00 | 25.5 | 1/9/2011 06:25:01 | 26.625 |
| 5/15/2010 09:38:00 | 25.5 | 1/9/2011 07:01:01 | 26.625 |
| 5/15/2010 10:13:00 | 25.5 | 1/9/2011 07:37:01 | 26.625 |
| 5/15/2010 10:48:00 | 25.5 | 1/9/2011 08:13:01 | 26.625 |
| 5/15/2010 11:23:00 | 25.0 | 1/9/2011 08:49:01 | 26.625 |
| 5/15/2010 11:58:00 | 25.0 | 1/9/2011 09:25:01 | 26.625 |
| 5/15/2010 12:33:00 | 25.0 | 1/9/2011 10:01:01 | 26.625 |
| 5/15/2010 13:08:00 | 25.0 | 1/9/2011 10:37:01 | 26.625 |
| 5/15/2010 13:43:00 | 25.0 | 1/9/2011 11:13:01 | 26.625 |
| 5/15/2010 14:18:00 | 25.0 | 1/9/2011 11:49:01 | 26.625 |
| 5/15/2010 14:53:00 | 25.0 | 1/9/2011 12:25:01 | 26.625 |
| 5/15/2010 15:28:00 | 25.0 | 1/9/2011 13:01:01 | 26.625 |
| 5/15/2010 16:03:00 | 25.0 | 1/9/2011 13:37:01 | 26.625 |
| 5/15/2010 16:38:00 | 25.0 | 1/9/2011 14:13:01 | 26.625 |
| 5/15/2010 17:13:00 | 25.5 | 1/9/2011 14:49:01 | 26.625 |
| 5/15/2010 17:48:00 | 25.5 | 1/9/2011 15:25:01 | 26.625 |
| 5/15/2010 18:23:00 | 25.5 | 1/9/2011 16:01:01 | 26.625 |
| 5/15/2010 18:58:00 | 25.5 | 1/9/2011 16:37:01 | 26.625 |
| 5/15/2010 19:33:00 | 25.5 | 1/9/2011 17:13:01 | 26.625 |
| 5/15/2010 20:08:00 | 25.5 | 1/9/2011 17:49:01 | 26.625 |
| 5/15/2010 20:43:00 | 25.5 | 1/9/2011 18:25:01 | 26.625 |
| 5/15/2010 21:18:00 | 25.5 | 1/9/2011 19:01:01 | 26.625 |
| 5/15/2010 21:53:00 | 25.5 | 1/9/2011 19:37:01 | 26.625 |

|                    |      |                    |        |
|--------------------|------|--------------------|--------|
| 5/15/2010 22:28:00 | 25.5 | 1/9/2011 20:13:01  | 26.625 |
| 5/15/2010 23:03:00 | 25.5 | 1/9/2011 20:49:01  | 26.625 |
| 5/15/2010 23:38:00 | 25.5 | 1/9/2011 21:25:01  | 26.625 |
| 5/16/2010 00:13:00 | 25.0 | 1/9/2011 22:01:01  | 26.625 |
| 5/16/2010 00:48:00 | 25.0 | 1/9/2011 22:37:01  | 26.625 |
| 5/16/2010 01:23:00 | 25.0 | 1/9/2011 23:13:01  | 26.625 |
| 5/16/2010 01:58:00 | 25.0 | 1/9/2011 23:49:01  | 26.625 |
| 5/16/2010 02:33:00 | 25.0 | 1/10/2011 00:25:01 | 26.625 |
| 5/16/2010 03:08:00 | 25.0 | 1/10/2011 01:01:01 | 26.625 |
| 5/16/2010 03:43:00 | 25.0 | 1/10/2011 01:37:01 | 27.124 |
| 5/16/2010 04:18:00 | 25.0 | 1/10/2011 02:13:01 | 27.124 |
| 5/16/2010 04:53:00 | 25.0 | 1/10/2011 02:49:01 | 26.625 |
| 5/16/2010 05:28:00 | 25.0 | 1/10/2011 03:25:01 | 27.124 |
| 5/16/2010 06:03:00 | 25.0 | 1/10/2011 04:01:01 | 27.124 |
| 5/16/2010 06:38:00 | 25.0 | 1/10/2011 04:37:01 | 27.124 |
| 5/16/2010 07:13:00 | 25.0 | 1/10/2011 05:13:01 | 26.625 |
| 5/16/2010 07:48:00 | 25.0 | 1/10/2011 05:49:01 | 26.625 |
| 5/16/2010 08:23:00 | 25.0 | 1/10/2011 06:25:01 | 26.625 |
| 5/16/2010 08:58:00 | 25.0 | 1/10/2011 07:01:01 | 26.625 |
| 5/16/2010 09:33:00 | 25.0 | 1/10/2011 07:37:01 | 26.625 |
| 5/16/2010 10:08:00 | 25.0 | 1/10/2011 08:13:01 | 26.625 |
| 5/16/2010 10:43:00 | 25.0 | 1/10/2011 08:49:01 | 26.625 |
| 5/16/2010 11:18:00 | 25.0 | 1/10/2011 09:25:01 | 26.625 |
| 5/16/2010 11:53:00 | 25.0 | 1/10/2011 10:01:01 | 26.625 |
| 5/16/2010 12:28:00 | 25.0 | 1/10/2011 10:37:01 | 26.625 |
| 5/16/2010 13:03:00 | 25.0 | 1/10/2011 11:13:01 | 26.625 |
| 5/16/2010 13:38:00 | 25.0 | 1/10/2011 11:49:01 | 26.125 |
| 5/16/2010 14:13:00 | 25.0 | 1/10/2011 12:25:01 | 26.625 |
| 5/16/2010 14:48:00 | 25.0 | 1/10/2011 13:01:01 | 26.625 |
| 5/16/2010 15:23:00 | 25.0 | 1/10/2011 13:37:01 | 26.625 |
| 5/16/2010 15:58:00 | 25.0 | 1/10/2011 14:13:01 | 26.125 |
| 5/16/2010 16:33:00 | 25.0 | 1/10/2011 14:49:01 | 26.625 |
| 5/16/2010 17:08:00 | 25.0 | 1/10/2011 15:25:01 | 26.625 |
| 5/16/2010 17:43:00 | 25.0 | 1/10/2011 16:01:01 | 26.625 |
| 5/16/2010 18:18:00 | 25.0 | 1/10/2011 16:37:01 | 26.625 |
| 5/16/2010 18:53:00 | 25.0 | 1/10/2011 17:13:01 | 26.625 |
| 5/16/2010 19:28:00 | 25.0 | 1/10/2011 17:49:01 | 26.625 |
| 5/16/2010 20:03:00 | 25.0 | 1/10/2011 18:25:01 | 26.625 |
| 5/16/2010 20:38:00 | 25.0 | 1/10/2011 19:01:01 | 26.625 |
| 5/16/2010 21:13:00 | 25.0 | 1/10/2011 19:37:01 | 26.625 |
| 5/16/2010 21:48:00 | 25.0 | 1/10/2011 20:13:01 | 26.625 |
| 5/16/2010 22:23:00 | 25.0 | 1/10/2011 20:49:01 | 26.625 |
| 5/16/2010 22:58:00 | 25.0 | 1/10/2011 21:25:01 | 26.625 |
| 5/16/2010 23:33:00 | 25.0 | 1/10/2011 22:01:01 | 26.625 |
| 5/17/2010 00:08:00 | 25.0 | 1/10/2011 22:37:01 | 26.625 |
| 5/17/2010 00:43:00 | 25.0 | 1/10/2011 23:13:01 | 26.625 |
| 5/17/2010 01:18:00 | 25.0 | 1/10/2011 23:49:01 | 26.625 |
| 5/17/2010 01:53:00 | 25.0 | 1/11/2011 00:25:01 | 26.625 |
| 5/17/2010 02:28:00 | 25.0 | 1/11/2011 01:01:01 | 26.625 |
| 5/17/2010 03:03:00 | 25.0 | 1/11/2011 01:37:01 | 26.625 |



|                    |      |                    |        |
|--------------------|------|--------------------|--------|
| 5/17/2010 03:38:00 | 25.0 | 1/11/2011 02:13:01 | 26.625 |
| 5/17/2010 04:13:00 | 25.0 | 1/11/2011 02:49:01 | 26.625 |
| 5/17/2010 04:48:00 | 24.5 | 1/11/2011 03:25:01 | 26.625 |
| 5/17/2010 05:23:00 | 24.5 | 1/11/2011 04:01:01 | 26.625 |
| 5/17/2010 05:58:00 | 24.5 | 1/11/2011 04:37:01 | 26.625 |
| 5/17/2010 06:33:00 | 24.5 | 1/11/2011 05:13:01 | 26.625 |
| 5/17/2010 07:08:00 | 24.5 | 1/11/2011 05:49:01 | 26.625 |
| 5/17/2010 07:43:00 | 24.5 | 1/11/2011 06:25:01 | 26.625 |
| 5/17/2010 08:18:00 | 24.5 | 1/11/2011 07:01:01 | 26.625 |
| 5/17/2010 08:53:00 | 24.5 | 1/11/2011 07:37:01 | 26.625 |
| 5/17/2010 09:28:00 | 24.5 | 1/11/2011 08:13:01 | 26.625 |
| 5/17/2010 10:03:00 | 24.5 | 1/11/2011 08:49:01 | 26.625 |
| 5/17/2010 10:38:00 | 24.5 | 1/11/2011 09:25:01 | 26.125 |
| 5/17/2010 11:13:00 | 24.5 | 1/11/2011 10:01:01 | 26.125 |
| 5/17/2010 11:48:00 | 24.5 | 1/11/2011 10:37:01 | 26.625 |
| 5/17/2010 12:23:00 | 24.5 | 1/11/2011 11:13:01 | 26.125 |
| 5/17/2010 12:58:00 | 24.5 | 1/11/2011 11:49:01 | 26.625 |
| 5/17/2010 13:33:00 | 24.5 | 1/11/2011 12:25:01 | 26.625 |
| 5/17/2010 14:08:00 | 24.5 | 1/11/2011 13:01:01 | 26.125 |
| 5/17/2010 14:43:00 | 24.5 | 1/11/2011 13:37:01 | 26.125 |
| 5/17/2010 15:18:00 | 24.5 | 1/11/2011 14:13:01 | 26.625 |
| 5/17/2010 15:53:00 | 24.5 | 1/11/2011 14:49:01 | 26.625 |
| 5/17/2010 16:28:00 | 25.0 | 1/11/2011 15:25:01 | 26.625 |
| 5/17/2010 17:03:00 | 25.0 | 1/11/2011 16:01:01 | 26.125 |
| 5/17/2010 17:38:00 | 25.0 | 1/11/2011 16:37:01 | 26.625 |
| 5/17/2010 18:13:00 | 25.0 | 1/11/2011 17:13:01 | 26.625 |
| 5/17/2010 18:48:00 | 25.0 | 1/11/2011 17:49:01 | 26.625 |
| 5/17/2010 19:23:00 | 25.0 | 1/11/2011 18:25:01 | 26.625 |
| 5/17/2010 19:58:00 | 25.0 | 1/11/2011 19:01:01 | 26.625 |
| 5/17/2010 20:33:00 | 25.0 | 1/11/2011 19:37:01 | 26.625 |
| 5/17/2010 21:08:00 | 25.0 | 1/11/2011 20:13:01 | 26.625 |
| 5/17/2010 21:43:00 | 25.0 | 1/11/2011 20:49:01 | 26.625 |
| 5/17/2010 22:18:00 | 25.0 | 1/11/2011 21:25:01 | 26.625 |
| 5/17/2010 22:53:00 | 25.0 | 1/11/2011 22:01:01 | 26.625 |
| 5/17/2010 23:28:00 | 25.0 | 1/11/2011 22:37:01 | 26.625 |
| 5/18/2010 00:03:00 | 25.0 | 1/11/2011 23:13:01 | 26.625 |
| 5/18/2010 00:38:00 | 25.0 | 1/11/2011 23:49:01 | 26.625 |
| 5/18/2010 01:13:00 | 25.0 | 1/12/2011 00:25:01 | 26.625 |
| 5/18/2010 01:48:00 | 25.0 | 1/12/2011 01:01:01 | 26.625 |
| 5/18/2010 02:23:00 | 25.0 | 1/12/2011 01:37:01 | 26.625 |
| 5/18/2010 02:58:00 | 25.0 | 1/12/2011 02:13:01 | 26.625 |
| 5/18/2010 03:33:00 | 25.0 | 1/12/2011 02:49:01 | 26.625 |
| 5/18/2010 04:08:00 | 25.0 | 1/12/2011 03:25:01 | 26.625 |
| 5/18/2010 04:43:00 | 25.0 | 1/12/2011 04:01:01 | 26.625 |
| 5/18/2010 05:18:00 | 25.0 | 1/12/2011 04:37:01 | 26.625 |
| 5/18/2010 05:53:00 | 25.0 | 1/12/2011 05:13:01 | 26.625 |
| 5/18/2010 06:28:00 | 25.0 | 1/12/2011 05:49:01 | 26.625 |
| 5/18/2010 07:03:00 | 25.0 | 1/12/2011 06:25:01 | 26.625 |
| 5/18/2010 07:38:00 | 25.0 | 1/12/2011 07:01:01 | 26.625 |
| 5/18/2010 08:13:00 | 25.0 | 1/12/2011 07:37:01 | 26.625 |

|                    |      |                    |        |
|--------------------|------|--------------------|--------|
| 5/18/2010 08:48:00 | 25.0 | 1/12/2011 08:13:01 | 26.625 |
| 5/18/2010 09:23:00 | 25.0 | 1/12/2011 08:49:01 | 26.625 |
| 5/18/2010 09:58:00 | 25.0 | 1/12/2011 09:25:01 | 26.625 |
| 5/18/2010 10:33:00 | 25.0 | 1/12/2011 10:01:01 | 26.625 |
| 5/18/2010 11:08:00 | 25.0 | 1/12/2011 10:37:01 | 26.625 |
| 5/18/2010 11:43:00 | 25.0 | 1/12/2011 11:13:01 | 26.625 |
| 5/18/2010 12:18:00 | 25.0 | 1/12/2011 11:49:01 | 26.125 |
| 5/18/2010 12:53:00 | 25.0 | 1/12/2011 12:25:01 | 26.125 |
| 5/18/2010 13:28:00 | 25.0 | 1/12/2011 13:01:01 | 26.625 |
| 5/18/2010 14:03:00 | 25.0 | 1/12/2011 13:37:01 | 26.125 |
| 5/18/2010 14:38:00 | 25.0 | 1/12/2011 14:13:01 | 26.125 |
| 5/18/2010 15:13:00 | 25.0 | 1/12/2011 14:49:01 | 26.125 |
| 5/18/2010 15:48:00 | 25.0 | 1/12/2011 15:25:01 | 26.125 |
| 5/18/2010 16:23:00 | 25.0 | 1/12/2011 16:01:01 | 26.125 |
| 5/18/2010 16:58:00 | 25.0 | 1/12/2011 16:37:01 | 26.125 |
| 5/18/2010 17:33:00 | 25.0 | 1/12/2011 17:13:01 | 26.125 |
| 5/18/2010 18:08:00 | 25.0 | 1/12/2011 17:49:01 | 26.125 |
| 5/18/2010 18:43:00 | 25.0 | 1/12/2011 18:25:01 | 26.125 |
| 5/18/2010 19:18:00 | 25.0 | 1/12/2011 19:01:01 | 26.625 |
| 5/18/2010 19:53:00 | 25.0 | 1/12/2011 19:37:01 | 26.625 |
| 5/18/2010 20:28:00 | 25.0 | 1/12/2011 20:13:01 | 26.125 |
| 5/18/2010 21:03:00 | 25.0 | 1/12/2011 20:49:01 | 26.125 |
| 5/18/2010 21:38:00 | 25.0 | 1/12/2011 21:25:01 | 26.125 |
| 5/18/2010 22:13:00 | 25.0 | 1/12/2011 22:01:01 | 26.125 |
| 5/18/2010 22:48:00 | 25.0 | 1/12/2011 22:37:01 | 26.625 |
| 5/18/2010 23:23:00 | 25.0 | 1/12/2011 23:13:01 | 26.625 |
| 5/18/2010 23:58:00 | 25.0 | 1/12/2011 23:49:01 | 26.625 |
| 5/19/2010 00:33:00 | 25.0 | 1/13/2011 00:25:01 | 26.125 |
| 5/19/2010 01:08:00 | 25.0 | 1/13/2011 01:01:01 | 26.125 |
| 5/19/2010 01:43:00 | 25.0 | 1/13/2011 01:37:01 | 26.125 |
| 5/19/2010 02:18:00 | 25.0 | 1/13/2011 02:13:01 | 26.125 |
| 5/19/2010 02:53:00 | 25.0 | 1/13/2011 02:49:01 | 26.125 |
| 5/19/2010 03:28:00 | 25.0 | 1/13/2011 03:25:01 | 26.125 |
| 5/19/2010 04:03:00 | 25.0 | 1/13/2011 04:01:01 | 26.125 |
| 5/19/2010 04:38:00 | 25.0 | 1/13/2011 04:37:01 | 26.125 |
| 5/19/2010 05:13:00 | 25.0 | 1/13/2011 05:13:01 | 26.125 |
| 5/19/2010 05:48:00 | 25.0 | 1/13/2011 05:49:01 | 26.125 |
| 5/19/2010 06:23:00 | 25.0 | 1/13/2011 06:25:01 | 26.125 |
| 5/19/2010 06:58:00 | 25.0 | 1/13/2011 07:01:01 | 26.125 |
| 5/19/2010 07:33:00 | 25.0 | 1/13/2011 07:37:01 | 26.125 |
| 5/19/2010 08:08:00 | 25.0 | 1/13/2011 08:13:01 | 26.125 |
| 5/19/2010 08:43:00 | 25.0 | 1/13/2011 08:49:01 | 26.125 |
| 5/19/2010 09:18:00 | 25.0 | 1/13/2011 09:25:01 | 26.125 |
| 5/19/2010 09:53:00 | 25.0 | 1/13/2011 10:01:01 | 26.125 |
| 5/19/2010 10:28:00 | 25.0 | 1/13/2011 10:37:01 | 26.125 |
| 5/19/2010 11:03:00 | 25.0 | 1/13/2011 11:13:01 | 26.125 |
| 5/19/2010 11:38:00 | 25.0 | 1/13/2011 11:49:01 | 26.125 |
| 5/19/2010 12:13:00 | 25.0 | 1/13/2011 12:25:01 | 26.125 |
| 5/19/2010 12:48:00 | 25.0 | 1/13/2011 13:01:01 | 26.125 |
| 5/19/2010 13:23:00 | 25.0 | 1/13/2011 13:37:01 | 26.125 |

|                    |      |                    |        |
|--------------------|------|--------------------|--------|
| 5/19/2010 13:58:00 | 25.0 | 1/13/2011 14:13:01 | 26.125 |
| 5/19/2010 14:33:00 | 25.0 | 1/13/2011 14:49:01 | 26.125 |
| 5/19/2010 15:08:00 | 25.0 | 1/13/2011 15:25:01 | 26.125 |
| 5/19/2010 15:43:00 | 25.0 | 1/13/2011 16:01:01 | 26.125 |
| 5/19/2010 16:18:00 | 25.5 | 1/13/2011 16:37:01 | 26.125 |
| 5/19/2010 16:53:00 | 25.5 | 1/13/2011 17:13:01 | 26.125 |
| 5/19/2010 17:28:00 | 25.5 | 1/13/2011 17:49:01 | 26.125 |
| 5/19/2010 18:03:00 | 25.5 | 1/13/2011 18:25:01 | 26.125 |
| 5/19/2010 18:38:00 | 25.5 | 1/13/2011 19:01:01 | 26.125 |
| 5/19/2010 19:13:00 | 25.5 | 1/13/2011 19:37:01 | 26.125 |
| 5/19/2010 19:48:00 | 25.5 | 1/13/2011 20:13:01 | 26.125 |
| 5/19/2010 20:23:00 | 25.5 | 1/13/2011 20:49:01 | 26.125 |
| 5/19/2010 20:58:00 | 25.5 | 1/13/2011 21:25:01 | 26.125 |
| 5/19/2010 21:33:00 | 25.5 | 1/13/2011 22:01:01 | 26.125 |
| 5/19/2010 22:08:00 | 25.5 | 1/13/2011 22:37:01 | 26.125 |
| 5/19/2010 22:43:00 | 25.5 | 1/13/2011 23:13:01 | 26.125 |
| 5/19/2010 23:18:00 | 25.5 | 1/13/2011 23:49:01 | 26.125 |
| 5/19/2010 23:53:00 | 25.5 | 1/14/2011 00:25:01 | 26.125 |
| 5/20/2010 00:28:00 | 25.5 | 1/14/2011 01:01:01 | 26.125 |
| 5/20/2010 01:03:00 | 25.5 | 1/14/2011 01:37:01 | 26.125 |
| 5/20/2010 01:38:00 | 25.5 | 1/14/2011 02:13:01 | 26.125 |
| 5/20/2010 02:13:00 | 25.5 | 1/14/2011 02:49:01 | 26.125 |
| 5/20/2010 02:48:00 | 25.5 | 1/14/2011 03:25:01 | 26.125 |
| 5/20/2010 03:23:00 | 25.5 | 1/14/2011 04:01:01 | 26.125 |
| 5/20/2010 03:58:00 | 25.5 | 1/14/2011 04:37:01 | 26.125 |
| 5/20/2010 04:33:00 | 25.5 | 1/14/2011 05:13:01 | 26.125 |
| 5/20/2010 05:08:00 | 25.5 | 1/14/2011 05:49:01 | 26.125 |
| 5/20/2010 05:43:00 | 25.5 | 1/14/2011 06:25:01 | 26.125 |
| 5/20/2010 06:18:00 | 25.5 | 1/14/2011 07:01:01 | 26.125 |
| 5/20/2010 06:53:00 | 25.5 | 1/14/2011 07:37:01 | 26.125 |
| 5/20/2010 07:28:00 | 25.5 | 1/14/2011 08:13:01 | 26.125 |
| 5/20/2010 08:03:00 | 25.5 | 1/14/2011 08:49:01 | 26.625 |
| 5/20/2010 08:38:00 | 25.5 | 1/14/2011 09:25:01 | 26.125 |
| 5/20/2010 09:13:00 | 25.5 | 1/14/2011 10:01:01 | 26.125 |
| 5/20/2010 09:48:00 | 25.5 | 1/14/2011 10:37:01 | 26.125 |
| 5/20/2010 10:23:00 | 25.5 | 1/14/2011 11:13:01 | 26.125 |
| 5/20/2010 10:58:00 | 25.5 | 1/14/2011 11:49:01 | 26.125 |
| 5/20/2010 11:33:00 | 25.5 | 1/14/2011 12:25:01 | 26.125 |
| 5/20/2010 12:08:00 | 25.5 | 1/14/2011 13:01:01 | 26.125 |
| 5/20/2010 12:43:00 | 25.5 | 1/14/2011 13:37:01 | 26.125 |
| 5/20/2010 13:18:00 | 25.5 | 1/14/2011 14:13:01 | 26.125 |
| 5/20/2010 13:53:00 | 25.5 | 1/14/2011 14:49:01 | 26.125 |
| 5/20/2010 14:28:00 | 25.5 | 1/14/2011 15:25:01 | 26.125 |
| 5/20/2010 15:03:00 | 25.5 | 1/14/2011 16:01:01 | 26.125 |
| 5/20/2010 15:38:00 | 25.5 | 1/14/2011 16:37:01 | 26.125 |
| 5/20/2010 16:13:00 | 25.5 | 1/14/2011 17:13:01 | 26.125 |
| 5/20/2010 16:48:00 | 25.5 | 1/14/2011 17:49:01 | 26.125 |
| 5/20/2010 17:23:00 | 25.5 | 1/14/2011 18:25:01 | 26.125 |
| 5/20/2010 17:58:00 | 25.5 | 1/14/2011 19:01:01 | 26.125 |
| 5/20/2010 18:33:00 | 25.5 | 1/14/2011 19:37:01 | 26.125 |

|                    |      |                    |        |
|--------------------|------|--------------------|--------|
| 5/20/2010 19:08:00 | 25.5 | 1/14/2011 20:13:01 | 26.125 |
| 5/20/2010 19:43:00 | 25.5 | 1/14/2011 20:49:01 | 26.125 |
| 5/20/2010 20:18:00 | 25.5 | 1/14/2011 21:25:01 | 26.125 |
| 5/20/2010 20:53:00 | 25.5 | 1/14/2011 22:01:01 | 26.125 |
| 5/20/2010 21:28:00 | 25.5 | 1/14/2011 22:37:01 | 26.125 |
| 5/20/2010 22:03:00 | 25.5 | 1/14/2011 23:13:01 | 26.125 |
| 5/20/2010 22:38:00 | 25.5 | 1/14/2011 23:49:01 | 26.125 |
| 5/20/2010 23:13:00 | 25.5 | 1/15/2011 00:25:01 | 26.125 |
| 5/20/2010 23:48:00 | 25.5 | 1/15/2011 01:01:01 | 26.125 |
| 5/21/2010 00:23:00 | 25.5 | 1/15/2011 01:37:01 | 26.125 |
| 5/21/2010 00:58:00 | 25.5 | 1/15/2011 02:13:01 | 26.125 |
| 5/21/2010 01:33:00 | 25.5 | 1/15/2011 02:49:01 | 26.125 |
| 5/21/2010 02:08:00 | 25.5 | 1/15/2011 03:25:01 | 26.125 |
| 5/21/2010 02:43:00 | 25.5 | 1/15/2011 04:01:01 | 26.125 |
| 5/21/2010 03:18:00 | 25.5 | 1/15/2011 04:37:01 | 26.125 |
| 5/21/2010 03:53:00 | 25.5 | 1/15/2011 05:13:01 | 26.125 |
| 5/21/2010 04:28:00 | 25.5 | 1/15/2011 05:49:01 | 26.125 |
| 5/21/2010 05:03:00 | 25.5 | 1/15/2011 06:25:01 | 26.125 |
| 5/21/2010 05:38:00 | 25.5 | 1/15/2011 07:01:01 | 26.125 |
| 5/21/2010 06:13:00 | 25.5 | 1/15/2011 07:37:01 | 26.125 |
| 5/21/2010 06:48:00 | 25.5 | 1/15/2011 08:13:01 | 26.125 |
| 5/21/2010 07:23:00 | 25.5 | 1/15/2011 08:49:01 | 26.125 |
| 5/21/2010 07:58:00 | 25.5 | 1/15/2011 09:25:01 | 26.125 |
| 5/21/2010 08:33:00 | 25.5 | 1/15/2011 10:01:01 | 26.125 |
| 5/21/2010 09:08:00 | 25.5 | 1/15/2011 10:37:01 | 26.125 |
| 5/21/2010 09:43:00 | 25.5 | 1/15/2011 11:13:01 | 26.125 |
| 5/21/2010 10:18:00 | 25.5 | 1/15/2011 11:49:01 | 26.125 |
| 5/21/2010 10:53:00 | 25.5 | 1/15/2011 12:25:01 | 26.125 |
| 5/21/2010 11:28:00 | 25.5 | 1/15/2011 13:01:01 | 26.125 |
| 5/21/2010 12:03:00 | 25.5 | 1/15/2011 13:37:01 | 26.125 |
| 5/21/2010 12:38:00 | 25.5 | 1/15/2011 14:13:01 | 26.125 |
| 5/21/2010 13:13:00 | 25.5 | 1/15/2011 14:49:01 | 26.125 |
| 5/21/2010 13:48:00 | 25.5 | 1/15/2011 15:25:01 | 26.125 |
| 5/21/2010 14:23:00 | 25.5 | 1/15/2011 16:01:01 | 26.125 |
| 5/21/2010 14:58:00 | 25.5 | 1/15/2011 16:37:01 | 26.125 |
| 5/21/2010 15:33:00 | 25.5 | 1/15/2011 17:13:01 | 26.125 |
| 5/21/2010 16:08:00 | 25.5 | 1/15/2011 17:49:01 | 26.125 |
| 5/21/2010 16:43:00 | 25.5 | 1/15/2011 18:25:01 | 26.125 |
| 5/21/2010 17:18:00 | 25.5 | 1/15/2011 19:01:01 | 26.125 |
| 5/21/2010 17:53:00 | 25.5 | 1/15/2011 19:37:01 | 26.125 |
| 5/21/2010 18:28:00 | 25.5 | 1/15/2011 20:13:01 | 26.125 |
| 5/21/2010 19:03:00 | 25.5 | 1/15/2011 20:49:01 | 26.125 |
| 5/21/2010 19:38:00 | 25.5 | 1/15/2011 21:25:01 | 26.125 |
| 5/21/2010 20:13:00 | 25.5 | 1/15/2011 22:01:01 | 26.125 |
| 5/21/2010 20:48:00 | 25.5 | 1/15/2011 22:37:01 | 26.125 |
| 5/21/2010 21:23:00 | 25.5 | 1/15/2011 23:13:01 | 26.125 |
| 5/21/2010 21:58:00 | 25.5 | 1/15/2011 23:49:01 | 26.125 |
| 5/21/2010 22:33:00 | 25.5 | 1/16/2011 00:25:01 | 26.125 |
| 5/21/2010 23:08:00 | 25.5 | 1/16/2011 01:01:01 | 26.125 |
| 5/21/2010 23:43:00 | 25.5 | 1/16/2011 01:37:01 | 26.125 |

|                    |      |                    |        |
|--------------------|------|--------------------|--------|
| 5/22/2010 00:18:00 | 25.5 | 1/16/2011 02:13:01 | 26.125 |
| 5/22/2010 00:53:00 | 25.5 | 1/16/2011 02:49:01 | 26.125 |
| 5/22/2010 01:28:00 | 25.5 | 1/16/2011 03:25:01 | 26.125 |
| 5/22/2010 02:03:00 | 25.5 | 1/16/2011 04:01:01 | 26.125 |
| 5/22/2010 02:38:00 | 25.5 | 1/16/2011 04:37:01 | 26.125 |
| 5/22/2010 03:13:00 | 25.5 | 1/16/2011 05:13:01 | 26.125 |
| 5/22/2010 03:48:00 | 25.5 | 1/16/2011 05:49:01 | 26.125 |
| 5/22/2010 04:23:00 | 25.5 | 1/16/2011 06:25:01 | 26.125 |
| 5/22/2010 04:58:00 | 25.5 | 1/16/2011 07:01:01 | 26.125 |
| 5/22/2010 05:33:00 | 25.5 | 1/16/2011 07:37:01 | 26.125 |
| 5/22/2010 06:08:00 | 25.5 | 1/16/2011 08:13:01 | 26.125 |
| 5/22/2010 06:43:00 | 25.5 | 1/16/2011 08:49:01 | 26.125 |
| 5/22/2010 07:18:00 | 25.5 | 1/16/2011 09:25:01 | 26.125 |
| 5/22/2010 07:53:00 | 25.5 | 1/16/2011 10:01:01 | 26.125 |
| 5/22/2010 08:28:00 | 25.5 | 1/16/2011 10:37:01 | 26.125 |
| 5/22/2010 09:03:00 | 25.5 | 1/16/2011 11:13:01 | 26.125 |
| 5/22/2010 09:38:00 | 25.5 | 1/16/2011 11:49:01 | 26.125 |
| 5/22/2010 10:13:00 | 25.5 | 1/16/2011 12:25:01 | 26.125 |
| 5/22/2010 10:48:00 | 25.5 | 1/16/2011 13:01:01 | 26.125 |
| 5/22/2010 11:23:00 | 25.5 | 1/16/2011 13:37:01 | 26.125 |
| 5/22/2010 11:58:00 | 25.5 | 1/16/2011 14:13:01 | 26.125 |
| 5/22/2010 12:33:00 | 25.5 | 1/16/2011 14:49:01 | 26.125 |
| 5/22/2010 13:08:00 | 25.5 | 1/16/2011 15:25:01 | 26.125 |
| 5/22/2010 13:43:00 | 25.5 | 1/16/2011 16:01:01 | 26.125 |
| 5/22/2010 14:18:00 | 25.5 | 1/16/2011 16:37:01 | 26.125 |
| 5/22/2010 14:53:00 | 25.5 | 1/16/2011 17:13:01 | 25.625 |
| 5/22/2010 15:28:00 | 25.5 | 1/16/2011 17:49:01 | 25.625 |
| 5/22/2010 16:03:00 | 25.5 | 1/16/2011 18:25:01 | 25.625 |
| 5/22/2010 16:38:00 | 25.5 | 1/16/2011 19:01:01 | 25.625 |
| 5/22/2010 17:13:00 | 25.5 | 1/16/2011 19:37:01 | 25.625 |
| 5/22/2010 17:48:00 | 25.5 | 1/16/2011 20:13:01 | 26.125 |
| 5/22/2010 18:23:00 | 25.5 | 1/16/2011 20:49:01 | 26.125 |
| 5/22/2010 18:58:00 | 25.5 | 1/16/2011 21:25:01 | 26.125 |
| 5/22/2010 19:33:00 | 25.5 | 1/16/2011 22:01:01 | 26.125 |
| 5/22/2010 20:08:00 | 25.5 | 1/16/2011 22:37:01 | 26.125 |
| 5/22/2010 20:43:00 | 25.5 | 1/16/2011 23:13:01 | 26.125 |
| 5/22/2010 21:18:00 | 25.5 | 1/16/2011 23:49:01 | 26.125 |
| 5/22/2010 21:53:00 | 25.5 | 1/17/2011 00:25:01 | 26.125 |
| 5/22/2010 22:28:00 | 25.5 | 1/17/2011 01:01:01 | 26.125 |
| 5/22/2010 23:03:00 | 25.5 | 1/17/2011 01:37:01 | 26.125 |
| 5/22/2010 23:38:00 | 25.5 | 1/17/2011 02:13:01 | 25.625 |
| 5/23/2010 00:13:00 | 25.5 | 1/17/2011 02:49:01 | 25.625 |
| 5/23/2010 00:48:00 | 25.5 | 1/17/2011 03:25:01 | 25.625 |
| 5/23/2010 01:23:00 | 25.5 | 1/17/2011 04:01:01 | 25.625 |
| 5/23/2010 01:58:00 | 25.5 | 1/17/2011 04:37:01 | 25.625 |
| 5/23/2010 02:33:00 | 25.5 | 1/17/2011 05:13:01 | 25.625 |
| 5/23/2010 03:08:00 | 25.5 | 1/17/2011 05:49:01 | 25.625 |
| 5/23/2010 03:43:00 | 25.5 | 1/17/2011 06:25:01 | 25.625 |
| 5/23/2010 04:18:00 | 25.5 | 1/17/2011 07:01:01 | 25.625 |
| 5/23/2010 04:53:00 | 25.5 | 1/17/2011 07:37:01 | 25.625 |

|                    |      |                    |        |
|--------------------|------|--------------------|--------|
| 5/23/2010 05:28:00 | 25.5 | 1/17/2011 08:13:01 | 25.625 |
| 5/23/2010 06:03:00 | 25.5 | 1/17/2011 08:49:01 | 25.625 |
| 5/23/2010 06:38:00 | 25.5 | 1/17/2011 09:25:01 | 25.625 |
| 5/23/2010 07:13:00 | 25.5 | 1/17/2011 10:01:01 | 26.125 |
| 5/23/2010 07:48:00 | 25.5 | 1/17/2011 10:37:01 | 26.125 |
| 5/23/2010 08:23:00 | 25.5 | 1/17/2011 11:13:01 | 26.125 |
| 5/23/2010 08:58:00 | 25.0 | 1/17/2011 11:49:01 | 26.125 |
| 5/23/2010 09:33:00 | 25.0 | 1/17/2011 12:25:01 | 26.125 |
| 5/23/2010 10:08:00 | 25.0 | 1/17/2011 13:01:01 | 26.125 |
| 5/23/2010 10:43:00 | 25.0 | 1/17/2011 13:37:01 | 26.125 |
| 5/23/2010 11:18:00 | 25.0 | 1/17/2011 14:13:01 | 26.125 |
| 5/23/2010 11:53:00 | 25.0 | 1/17/2011 14:49:01 | 26.125 |
| 5/23/2010 12:28:00 | 25.0 | 1/17/2011 15:25:01 | 26.125 |
| 5/23/2010 13:03:00 | 25.0 | 1/17/2011 16:01:01 | 26.125 |
| 5/23/2010 13:38:00 | 25.0 | 1/17/2011 16:37:01 | 26.125 |
| 5/23/2010 14:13:00 | 25.0 | 1/17/2011 17:13:01 | 25.625 |
| 5/23/2010 14:48:00 | 25.5 | 1/17/2011 17:49:01 | 25.625 |
| 5/23/2010 15:23:00 | 25.5 | 1/17/2011 18:25:01 | 25.625 |
| 5/23/2010 15:58:00 | 25.5 | 1/17/2011 19:01:01 | 25.625 |
| 5/23/2010 16:33:00 | 25.5 | 1/17/2011 19:37:01 | 25.625 |
| 5/23/2010 17:08:00 | 25.5 | 1/17/2011 20:13:01 | 26.125 |
| 5/23/2010 17:43:00 | 25.5 | 1/17/2011 20:49:01 | 25.625 |
| 5/23/2010 18:18:00 | 25.5 | 1/17/2011 21:25:01 | 26.125 |
| 5/23/2010 18:53:00 | 25.5 | 1/17/2011 22:01:01 | 26.125 |
| 5/23/2010 19:28:00 | 25.5 | 1/17/2011 22:37:01 | 26.125 |
| 5/23/2010 20:03:00 | 25.5 | 1/17/2011 23:13:01 | 26.125 |
| 5/23/2010 20:38:00 | 25.5 | 1/17/2011 23:49:01 | 26.125 |
| 5/23/2010 21:13:00 | 25.5 | 1/18/2011 00:25:01 | 26.125 |
| 5/23/2010 21:48:00 | 25.5 | 1/18/2011 01:01:01 | 26.125 |
| 5/23/2010 22:23:00 | 25.5 | 1/18/2011 01:37:01 | 26.125 |
| 5/23/2010 22:58:00 | 25.5 | 1/18/2011 02:13:01 | 26.125 |
| 5/23/2010 23:33:00 | 25.5 | 1/18/2011 02:49:01 | 26.125 |
| 5/24/2010 00:08:00 | 25.5 | 1/18/2011 03:25:01 | 26.125 |
| 5/24/2010 00:43:00 | 25.5 | 1/18/2011 04:01:01 | 26.125 |
| 5/24/2010 01:18:00 | 25.5 | 1/18/2011 04:37:01 | 26.125 |
| 5/24/2010 01:53:00 | 25.5 | 1/18/2011 05:13:01 | 26.125 |
| 5/24/2010 02:28:00 | 25.5 | 1/18/2011 05:49:01 | 26.125 |
| 5/24/2010 03:03:00 | 25.5 | 1/18/2011 06:25:01 | 26.125 |
| 5/24/2010 03:38:00 | 25.0 | 1/18/2011 07:01:01 | 26.125 |
| 5/24/2010 04:13:00 | 25.0 | 1/18/2011 07:37:01 | 26.125 |
| 5/24/2010 04:48:00 | 25.0 | 1/18/2011 08:13:01 | 26.125 |
| 5/24/2010 05:23:00 | 25.0 | 1/18/2011 08:49:01 | 26.125 |
| 5/24/2010 05:58:00 | 25.0 | 1/18/2011 09:25:01 | 26.125 |
| 5/24/2010 06:33:00 | 25.0 | 1/18/2011 10:01:01 | 26.125 |
| 5/24/2010 07:08:00 | 25.0 | 1/18/2011 10:37:01 | 25.625 |
| 5/24/2010 07:43:00 | 25.0 | 1/18/2011 11:13:01 | 26.125 |
| 5/24/2010 08:18:00 | 25.0 | 1/18/2011 11:49:01 | 25.625 |
| 5/24/2010 08:53:00 | 25.0 | 1/18/2011 12:25:01 | 25.625 |
| 5/24/2010 09:28:00 | 25.0 | 1/18/2011 13:01:01 | 25.625 |
| 5/24/2010 10:03:00 | 25.0 | 1/18/2011 13:37:01 | 26.125 |

|                    |      |                    |        |
|--------------------|------|--------------------|--------|
| 5/24/2010 10:38:00 | 25.0 | 1/18/2011 14:13:01 | 26.125 |
| 5/24/2010 11:13:00 | 25.0 | 1/18/2011 14:49:01 | 26.125 |
| 5/24/2010 11:48:00 | 25.0 | 1/18/2011 15:25:01 | 26.125 |
| 5/24/2010 12:23:00 | 25.0 | 1/18/2011 16:01:01 | 26.125 |
| 5/24/2010 12:58:00 | 25.0 | 1/18/2011 16:37:01 | 26.125 |
| 5/24/2010 13:33:00 | 25.0 | 1/18/2011 17:13:01 | 26.125 |
| 5/24/2010 14:08:00 | 25.0 | 1/18/2011 17:49:01 | 26.125 |
| 5/24/2010 14:43:00 | 25.5 | 1/18/2011 18:25:01 | 26.125 |
| 5/24/2010 15:18:00 | 25.5 | 1/18/2011 19:01:01 | 26.125 |
| 5/24/2010 15:53:00 | 25.5 | 1/18/2011 19:37:01 | 26.125 |
| 5/24/2010 16:28:00 | 25.5 | 1/18/2011 20:13:01 | 26.125 |
| 5/24/2010 17:03:00 | 25.5 | 1/18/2011 20:49:01 | 26.125 |
| 5/24/2010 17:38:00 | 25.5 | 1/18/2011 21:25:01 | 26.125 |
| 5/24/2010 18:13:00 | 25.5 | 1/18/2011 22:01:01 | 26.125 |
| 5/24/2010 18:48:00 | 25.5 | 1/18/2011 22:37:01 | 26.125 |
| 5/24/2010 19:23:00 | 25.5 | 1/18/2011 23:13:01 | 26.125 |
| 5/24/2010 19:58:00 | 25.5 | 1/18/2011 23:49:01 | 26.125 |
| 5/24/2010 20:33:00 | 25.5 | 1/19/2011 00:25:01 | 26.125 |
| 5/24/2010 21:08:00 | 25.0 | 1/19/2011 01:01:01 | 26.125 |
| 5/24/2010 21:43:00 | 25.0 | 1/19/2011 01:37:01 | 26.125 |
| 5/24/2010 22:18:00 | 25.0 | 1/19/2011 02:13:01 | 26.125 |
| 5/24/2010 22:53:00 | 25.0 | 1/19/2011 02:49:01 | 26.125 |
| 5/24/2010 23:28:00 | 25.5 | 1/19/2011 03:25:01 | 26.125 |
| 5/25/2010 00:03:00 | 25.0 | 1/19/2011 04:01:01 | 26.125 |
| 5/25/2010 00:38:00 | 25.5 | 1/19/2011 04:37:01 | 26.125 |
| 5/25/2010 01:13:00 | 25.5 | 1/19/2011 05:13:01 | 26.125 |
| 5/25/2010 01:48:00 | 25.5 | 1/19/2011 05:49:01 | 26.125 |
| 5/25/2010 02:23:00 | 25.5 | 1/19/2011 06:25:01 | 26.125 |
| 5/25/2010 02:58:00 | 25.0 | 1/19/2011 07:01:01 | 26.125 |
| 5/25/2010 03:33:00 | 25.0 | 1/19/2011 07:37:01 | 26.125 |
| 5/25/2010 04:08:00 | 25.0 | 1/19/2011 08:13:01 | 26.125 |
| 5/25/2010 04:43:00 | 25.0 | 1/19/2011 08:49:01 | 26.125 |
| 5/25/2010 05:18:00 | 25.0 | 1/19/2011 09:25:01 | 26.125 |
| 5/25/2010 05:53:00 | 25.0 | 1/19/2011 10:01:01 | 26.125 |
| 5/25/2010 06:28:00 | 25.0 | 1/19/2011 10:37:01 | 26.125 |
| 5/25/2010 07:03:00 | 25.0 | 1/19/2011 11:13:01 | 26.125 |
| 5/25/2010 07:38:00 | 25.0 | 1/19/2011 11:49:01 | 26.125 |
| 5/25/2010 08:13:00 | 25.0 | 1/19/2011 12:25:01 | 26.125 |
| 5/25/2010 08:48:00 | 25.0 | 1/19/2011 13:01:01 | 26.125 |
| 5/25/2010 09:23:00 | 25.0 | 1/19/2011 13:37:01 | 26.125 |
| 5/25/2010 09:58:00 | 25.0 | 1/19/2011 14:13:01 | 26.125 |
| 5/25/2010 10:33:00 | 25.0 | 1/19/2011 14:49:01 | 26.125 |
| 5/25/2010 11:08:00 | 25.0 | 1/19/2011 15:25:01 | 26.125 |
| 5/25/2010 11:43:00 | 25.0 | 1/19/2011 16:01:01 | 26.125 |
| 5/25/2010 12:18:00 | 25.0 | 1/19/2011 16:37:01 | 26.625 |
| 5/25/2010 12:53:00 | 25.0 | 1/19/2011 17:13:01 | 26.125 |
| 5/25/2010 13:28:00 | 25.0 | 1/19/2011 17:49:01 | 26.125 |
| 5/25/2010 14:03:00 | 25.0 | 1/19/2011 18:25:01 | 26.125 |
| 5/25/2010 14:38:00 | 25.0 | 1/19/2011 19:01:01 | 26.125 |
| 5/25/2010 15:13:00 | 25.0 | 1/19/2011 19:37:01 | 26.125 |

|                    |      |                    |        |
|--------------------|------|--------------------|--------|
| 5/25/2010 15:48:00 | 25.5 | 1/19/2011 20:13:01 | 26.125 |
| 5/25/2010 16:23:00 | 25.5 | 1/19/2011 20:49:01 | 26.125 |
| 5/25/2010 16:58:00 | 25.5 | 1/19/2011 21:25:01 | 26.125 |
| 5/25/2010 17:33:00 | 25.5 | 1/19/2011 22:01:01 | 26.125 |
| 5/25/2010 18:08:00 | 25.5 | 1/19/2011 22:37:01 | 26.125 |
| 5/25/2010 18:43:00 | 25.5 | 1/19/2011 23:13:01 | 26.125 |
| 5/25/2010 19:18:00 | 25.5 | 1/19/2011 23:49:01 | 26.125 |
| 5/25/2010 19:53:00 | 25.5 | 1/20/2011 00:25:01 | 26.125 |
| 5/25/2010 20:28:00 | 25.5 | 1/20/2011 01:01:01 | 26.125 |
| 5/25/2010 21:03:00 | 25.5 | 1/20/2011 01:37:01 | 26.125 |
| 5/25/2010 21:38:00 | 25.5 | 1/20/2011 02:13:01 | 26.125 |
| 5/25/2010 22:13:00 | 25.5 | 1/20/2011 02:49:01 | 26.125 |
| 5/25/2010 22:48:00 | 25.5 | 1/20/2011 03:25:01 | 26.125 |
| 5/25/2010 23:23:00 | 25.5 | 1/20/2011 04:01:01 | 26.125 |
| 5/25/2010 23:58:00 | 25.5 | 1/20/2011 04:37:01 | 26.125 |
| 5/26/2010 00:33:00 | 25.5 | 1/20/2011 05:13:01 | 26.125 |
| 5/26/2010 01:08:00 | 25.5 | 1/20/2011 05:49:01 | 26.125 |
| 5/26/2010 01:43:00 | 25.5 | 1/20/2011 06:25:01 | 26.125 |
| 5/26/2010 02:18:00 | 25.5 | 1/20/2011 07:01:01 | 26.125 |
| 5/26/2010 02:53:00 | 25.5 | 1/20/2011 07:37:01 | 26.125 |
| 5/26/2010 03:28:00 | 25.5 | 1/20/2011 08:13:01 | 26.125 |
| 5/26/2010 04:03:00 | 25.0 | 1/20/2011 08:49:01 | 26.125 |
| 5/26/2010 04:38:00 | 25.0 | 1/20/2011 09:25:01 | 26.125 |
| 5/26/2010 05:13:00 | 25.0 | 1/20/2011 10:01:01 | 26.125 |
| 5/26/2010 05:48:00 | 25.0 | 1/20/2011 10:37:01 | 26.125 |
| 5/26/2010 06:23:00 | 25.0 | 1/20/2011 11:13:01 | 26.125 |
| 5/26/2010 06:58:00 | 25.0 | 1/20/2011 11:49:01 | 26.125 |
| 5/26/2010 07:33:00 | 25.0 | 1/20/2011 12:25:01 | 25.625 |
| 5/26/2010 08:08:00 | 25.0 | 1/20/2011 13:01:01 | 25.625 |
| 5/26/2010 08:43:00 | 25.0 | 1/20/2011 13:37:01 | 26.125 |
| 5/26/2010 09:18:00 | 25.0 | 1/20/2011 14:13:01 | 26.125 |
| 5/26/2010 09:53:00 | 25.0 | 1/20/2011 14:49:01 | 26.125 |
| 5/26/2010 10:28:00 | 25.0 | 1/20/2011 15:25:01 | 26.125 |
| 5/26/2010 11:03:00 | 25.0 | 1/20/2011 16:01:01 | 25.625 |
| 5/26/2010 11:38:00 | 25.0 | 1/20/2011 16:37:01 | 25.625 |
| 5/26/2010 12:13:00 | 25.0 | 1/20/2011 17:13:01 | 26.125 |
| 5/26/2010 12:48:00 | 25.0 | 1/20/2011 17:49:01 | 26.125 |
| 5/26/2010 13:23:00 | 25.0 | 1/20/2011 18:25:01 | 26.125 |
| 5/26/2010 13:58:00 | 25.0 | 1/20/2011 19:01:01 | 26.125 |
| 5/26/2010 14:33:00 | 25.0 | 1/20/2011 19:37:01 | 26.125 |
| 5/26/2010 15:08:00 | 25.0 | 1/20/2011 20:13:01 | 26.125 |
| 5/26/2010 15:43:00 | 25.0 | 1/20/2011 20:49:01 | 26.125 |
| 5/26/2010 16:18:00 | 25.0 | 1/20/2011 21:25:01 | 26.125 |
| 5/26/2010 16:53:00 | 25.5 | 1/20/2011 22:01:01 | 26.125 |
| 5/26/2010 17:28:00 | 25.5 | 1/20/2011 22:37:01 | 26.125 |
| 5/26/2010 18:03:00 | 25.5 | 1/20/2011 23:13:01 | 26.125 |
| 5/26/2010 18:38:00 | 25.5 | 1/20/2011 23:49:01 | 26.125 |
| 5/26/2010 19:13:00 | 25.5 | 1/21/2011 00:25:01 | 26.125 |
| 5/26/2010 19:48:00 | 25.5 | 1/21/2011 01:01:01 | 26.125 |
| 5/26/2010 20:23:00 | 25.5 | 1/21/2011 01:37:01 | 26.125 |



|                    |      |                    |        |
|--------------------|------|--------------------|--------|
| 5/26/2010 20:58:00 | 25.5 | 1/21/2011 02:13:01 | 26.125 |
| 5/26/2010 21:33:00 | 25.5 | 1/21/2011 02:49:01 | 25.625 |
| 5/26/2010 22:08:00 | 25.5 | 1/21/2011 03:25:01 | 25.625 |
| 5/26/2010 22:43:00 | 25.5 | 1/21/2011 04:01:01 | 25.625 |
| 5/26/2010 23:18:00 | 25.5 | 1/21/2011 04:37:01 | 25.625 |
| 5/26/2010 23:53:00 | 25.5 | 1/21/2011 05:13:01 | 25.625 |
| 5/27/2010 00:28:00 | 25.5 | 1/21/2011 05:49:01 | 25.625 |
| 5/27/2010 01:03:00 | 25.5 | 1/21/2011 06:25:01 | 25.625 |
| 5/27/2010 01:38:00 | 25.5 | 1/21/2011 07:01:01 | 25.625 |
| 5/27/2010 02:13:00 | 25.5 | 1/21/2011 07:37:01 | 25.625 |
| 5/27/2010 02:48:00 | 25.5 | 1/21/2011 08:13:01 | 25.625 |
| 5/27/2010 03:23:00 | 25.5 | 1/21/2011 08:49:01 | 25.625 |
| 5/27/2010 03:58:00 | 25.5 | 1/21/2011 09:25:01 | 25.625 |
| 5/27/2010 04:33:00 | 25.5 | 1/21/2011 10:01:01 | 25.625 |
| 5/27/2010 05:08:00 | 25.5 | 1/21/2011 10:37:01 | 25.625 |
| 5/27/2010 05:43:00 | 25.5 | 1/21/2011 11:13:01 | 26.125 |
| 5/27/2010 06:18:00 | 25.5 | 1/21/2011 11:49:01 | 26.125 |
| 5/27/2010 06:53:00 | 25.5 | 1/21/2011 12:25:01 | 26.125 |
| 5/27/2010 07:28:00 | 25.0 | 1/21/2011 13:01:01 | 26.125 |
| 5/27/2010 08:03:00 | 25.0 | 1/21/2011 13:37:01 | 25.625 |
| 5/27/2010 08:38:00 | 25.0 | 1/21/2011 14:13:01 | 25.625 |
| 5/27/2010 09:13:00 | 25.0 | 1/21/2011 14:49:01 | 25.625 |
| 5/27/2010 09:48:00 | 25.0 | 1/21/2011 15:25:01 | 25.625 |
| 5/27/2010 10:23:00 | 25.0 | 1/21/2011 16:01:01 | 25.625 |
| 5/27/2010 10:58:00 | 25.0 | 1/21/2011 16:37:01 | 25.625 |
| 5/27/2010 11:33:00 | 25.0 | 1/21/2011 17:13:01 | 25.625 |
| 5/27/2010 12:08:00 | 25.0 | 1/21/2011 17:49:01 | 25.625 |
| 5/27/2010 12:43:00 | 25.0 | 1/21/2011 18:25:01 | 25.625 |
| 5/27/2010 13:18:00 | 25.0 | 1/21/2011 19:01:01 | 25.625 |
| 5/27/2010 13:53:00 | 25.0 | 1/21/2011 19:37:01 | 25.625 |
| 5/27/2010 14:28:00 | 25.5 | 1/21/2011 20:13:01 | 25.625 |
| 5/27/2010 15:03:00 | 25.5 | 1/21/2011 20:49:01 | 25.625 |
| 5/27/2010 15:38:00 | 25.5 | 1/21/2011 21:25:01 | 25.625 |
| 5/27/2010 16:13:00 | 25.5 | 1/21/2011 22:01:01 | 25.625 |
| 5/27/2010 16:48:00 | 25.5 | 1/21/2011 22:37:01 | 25.625 |
| 5/27/2010 17:23:00 | 25.5 | 1/21/2011 23:13:01 | 25.625 |
| 5/27/2010 17:58:00 | 25.5 | 1/21/2011 23:49:01 | 25.625 |
| 5/27/2010 18:33:00 | 25.5 | 1/22/2011 00:25:01 | 25.625 |
| 5/27/2010 19:08:00 | 25.5 | 1/22/2011 01:01:01 | 25.625 |
| 5/27/2010 19:43:00 | 25.5 | 1/22/2011 01:37:01 | 25.625 |
| 5/27/2010 20:18:00 | 25.5 | 1/22/2011 02:13:01 | 25.625 |
| 5/27/2010 20:53:00 | 25.5 | 1/22/2011 02:49:01 | 25.625 |
| 5/27/2010 21:28:00 | 25.5 | 1/22/2011 03:25:01 | 25.625 |
| 5/27/2010 22:03:00 | 25.5 | 1/22/2011 04:01:01 | 25.625 |
| 5/27/2010 22:38:00 | 25.5 | 1/22/2011 04:37:01 | 25.625 |
| 5/27/2010 23:13:00 | 25.5 | 1/22/2011 05:13:01 | 25.625 |
| 5/27/2010 23:48:00 | 25.5 | 1/22/2011 05:49:01 | 25.625 |
| 5/28/2010 00:23:00 | 25.5 | 1/22/2011 06:25:01 | 25.625 |
| 5/28/2010 00:58:00 | 25.5 | 1/22/2011 07:01:01 | 25.625 |
| 5/28/2010 01:33:00 | 25.5 | 1/22/2011 07:37:01 | 25.625 |

|                    |      |                    |        |
|--------------------|------|--------------------|--------|
| 5/28/2010 02:08:00 | 25.5 | 1/22/2011 08:13:01 | 25.625 |
| 5/28/2010 02:43:00 | 25.5 | 1/22/2011 08:49:01 | 25.625 |
| 5/28/2010 03:18:00 | 25.5 | 1/22/2011 09:25:01 | 25.625 |
| 5/28/2010 03:53:00 | 25.5 | 1/22/2011 10:01:01 | 25.625 |
| 5/28/2010 04:28:00 | 25.5 | 1/22/2011 10:37:01 | 25.625 |
| 5/28/2010 05:03:00 | 25.5 | 1/22/2011 11:13:01 | 25.625 |
| 5/28/2010 05:38:00 | 25.5 | 1/22/2011 11:49:01 | 25.625 |
| 5/28/2010 06:13:00 | 25.5 | 1/22/2011 12:25:01 | 25.625 |
| 5/28/2010 06:48:00 | 25.5 | 1/22/2011 13:01:01 | 25.625 |
| 5/28/2010 07:23:00 | 25.5 | 1/22/2011 13:37:01 | 25.625 |
| 5/28/2010 07:58:00 | 25.5 | 1/22/2011 14:13:01 | 25.625 |
| 5/28/2010 08:33:00 | 25.5 | 1/22/2011 14:49:01 | 25.625 |
| 5/28/2010 09:08:00 | 25.5 | 1/22/2011 15:25:01 | 25.625 |
| 5/28/2010 09:43:00 | 25.5 | 1/22/2011 16:01:01 | 25.625 |
| 5/28/2010 10:18:00 | 25.5 | 1/22/2011 16:37:01 | 25.625 |
| 5/28/2010 10:53:00 | 25.5 | 1/22/2011 17:13:01 | 25.625 |
| 5/28/2010 11:28:00 | 25.5 | 1/22/2011 17:49:01 | 25.625 |
| 5/28/2010 12:03:00 | 25.5 | 1/22/2011 18:25:01 | 25.625 |
| 5/28/2010 12:38:00 | 25.5 | 1/22/2011 19:01:01 | 25.625 |
| 5/28/2010 13:13:00 | 25.5 | 1/22/2011 19:37:01 | 25.625 |
| 5/28/2010 13:48:00 | 25.5 | 1/22/2011 20:13:01 | 25.625 |
| 5/28/2010 14:23:00 | 25.5 | 1/22/2011 20:49:01 | 25.625 |
| 5/28/2010 14:58:00 | 25.5 | 1/22/2011 21:25:01 | 25.625 |
| 5/28/2010 15:33:00 | 25.5 | 1/22/2011 22:01:01 | 25.625 |
| 5/28/2010 16:08:00 | 25.5 | 1/22/2011 22:37:01 | 25.625 |
| 5/28/2010 16:43:00 | 25.5 | 1/22/2011 23:13:01 | 25.625 |
| 5/28/2010 17:18:00 | 25.5 | 1/22/2011 23:49:01 | 25.625 |
| 5/28/2010 17:53:00 | 25.5 | 1/23/2011 00:25:01 | 25.625 |
| 5/28/2010 18:28:00 | 25.5 | 1/23/2011 01:01:01 | 25.625 |
| 5/28/2010 19:03:00 | 25.5 | 1/23/2011 01:37:01 | 25.625 |
| 5/28/2010 19:38:00 | 25.5 | 1/23/2011 02:13:01 | 25.625 |
| 5/28/2010 20:13:00 | 25.5 | 1/23/2011 02:49:01 | 25.625 |
| 5/28/2010 20:48:00 | 25.5 | 1/23/2011 03:25:01 | 25.625 |
| 5/28/2010 21:23:00 | 25.5 | 1/23/2011 04:01:01 | 25.625 |
| 5/28/2010 21:58:00 | 25.5 | 1/23/2011 04:37:01 | 25.625 |
| 5/28/2010 22:33:00 | 25.5 | 1/23/2011 05:13:01 | 25.625 |
| 5/28/2010 23:08:00 | 25.5 | 1/23/2011 05:49:01 | 26.125 |
| 5/28/2010 23:43:00 | 25.5 | 1/23/2011 06:25:01 | 26.125 |
| 5/29/2010 00:18:00 | 25.5 | 1/23/2011 07:01:01 | 26.125 |
| 5/29/2010 00:53:00 | 25.5 | 1/23/2011 07:37:01 | 26.125 |
| 5/29/2010 01:28:00 | 25.5 | 1/23/2011 08:13:01 | 25.625 |
| 5/29/2010 02:03:00 | 25.5 | 1/23/2011 08:49:01 | 25.625 |
| 5/29/2010 02:38:00 | 25.5 | 1/23/2011 09:25:01 | 25.625 |
| 5/29/2010 03:13:00 | 25.5 | 1/23/2011 10:01:01 | 25.625 |
| 5/29/2010 03:48:00 | 25.5 | 1/23/2011 10:37:01 | 25.625 |
| 5/29/2010 04:23:00 | 25.5 | 1/23/2011 11:13:01 | 25.625 |
| 5/29/2010 04:58:00 | 25.5 | 1/23/2011 11:49:01 | 25.625 |
| 5/29/2010 05:33:00 | 25.5 | 1/23/2011 12:25:01 | 25.625 |
| 5/29/2010 06:08:00 | 25.5 | 1/23/2011 13:01:01 | 25.625 |
| 5/29/2010 06:43:00 | 25.5 | 1/23/2011 13:37:01 | 25.625 |

|                    |      |                    |        |
|--------------------|------|--------------------|--------|
| 5/29/2010 07:18:00 | 25.5 | 1/23/2011 14:13:01 | 25.625 |
| 5/29/2010 07:53:00 | 25.5 | 1/23/2011 14:49:01 | 25.625 |
| 5/29/2010 08:28:00 | 25.5 | 1/23/2011 15:25:01 | 25.625 |
| 5/29/2010 09:03:00 | 25.5 | 1/23/2011 16:01:01 | 25.625 |
| 5/29/2010 09:38:00 | 25.5 | 1/23/2011 16:37:01 | 25.625 |
| 5/29/2010 10:13:00 | 25.5 | 1/23/2011 17:13:01 | 25.625 |
| 5/29/2010 10:48:00 | 25.5 | 1/23/2011 17:49:01 | 25.625 |
| 5/29/2010 11:23:00 | 25.5 | 1/23/2011 18:25:01 | 25.625 |
| 5/29/2010 11:58:00 | 25.5 | 1/23/2011 19:01:01 | 25.625 |
| 5/29/2010 12:33:00 | 25.5 | 1/23/2011 19:37:01 | 25.625 |
| 5/29/2010 13:08:00 | 25.5 | 1/23/2011 20:13:01 | 25.625 |
| 5/29/2010 13:43:00 | 25.5 | 1/23/2011 20:49:01 | 25.625 |
| 5/29/2010 14:18:00 | 25.5 | 1/23/2011 21:25:01 | 25.625 |
| 5/29/2010 14:53:00 | 25.5 | 1/23/2011 22:01:01 | 25.625 |
| 5/29/2010 15:28:00 | 25.5 | 1/23/2011 22:37:01 | 25.625 |
| 5/29/2010 16:03:00 | 25.5 | 1/23/2011 23:13:01 | 25.625 |
| 5/29/2010 16:38:00 | 25.5 | 1/23/2011 23:49:01 | 25.625 |
| 5/29/2010 17:13:00 | 25.5 | 1/24/2011 00:25:01 | 25.625 |
| 5/29/2010 17:48:00 | 25.5 | 1/24/2011 01:01:01 | 25.625 |
| 5/29/2010 18:23:00 | 25.5 | 1/24/2011 01:37:01 | 25.625 |
| 5/29/2010 18:58:00 | 25.5 | 1/24/2011 02:13:01 | 25.625 |
| 5/29/2010 19:33:00 | 25.5 | 1/24/2011 02:49:01 | 25.625 |
| 5/29/2010 20:08:00 | 25.5 | 1/24/2011 03:25:01 | 25.625 |
| 5/29/2010 20:43:00 | 25.5 | 1/24/2011 04:01:01 | 25.625 |
| 5/29/2010 21:18:00 | 25.5 | 1/24/2011 04:37:01 | 26.125 |
| 5/29/2010 21:53:00 | 25.5 | 1/24/2011 05:13:01 | 26.125 |
| 5/29/2010 22:28:00 | 25.5 | 1/24/2011 05:49:01 | 26.125 |
| 5/29/2010 23:03:00 | 25.5 | 1/24/2011 06:25:01 | 26.125 |
| 5/29/2010 23:38:00 | 25.5 | 1/24/2011 07:01:01 | 26.125 |
| 5/30/2010 00:13:00 | 25.5 | 1/24/2011 07:37:01 | 25.625 |
| 5/30/2010 00:48:00 | 25.5 | 1/24/2011 08:13:01 | 26.125 |
| 5/30/2010 01:23:00 | 25.5 | 1/24/2011 08:49:01 | 26.625 |
| 5/30/2010 01:58:00 | 25.5 | 1/24/2011 09:25:01 | 26.625 |
| 5/30/2010 02:33:00 | 25.5 | 1/24/2011 10:01:01 | 26.625 |
| 5/30/2010 03:08:00 | 25.5 | 1/24/2011 10:37:01 | 26.625 |
| 5/30/2010 03:43:00 | 25.5 | 1/24/2011 11:13:01 | 26.125 |
| 5/30/2010 04:18:00 | 25.5 | 1/24/2011 11:49:01 | 26.125 |
| 5/30/2010 04:53:00 | 25.5 | 1/24/2011 12:25:01 | 26.125 |
| 5/30/2010 05:28:00 | 25.5 | 1/24/2011 13:01:01 | 26.125 |
| 5/30/2010 06:03:00 | 25.5 | 1/24/2011 13:37:01 | 26.125 |
| 5/30/2010 06:38:00 | 25.5 | 1/24/2011 14:13:01 | 26.125 |
| 5/30/2010 07:13:00 | 25.5 | 1/24/2011 14:49:01 | 26.125 |
| 5/30/2010 07:48:00 | 25.5 | 1/24/2011 15:25:01 | 26.125 |
| 5/30/2010 08:23:00 | 25.0 | 1/24/2011 16:01:01 | 26.125 |
| 5/30/2010 08:58:00 | 25.0 | 1/24/2011 16:37:01 | 25.625 |
| 5/30/2010 09:33:00 | 25.0 | 1/24/2011 17:13:01 | 26.125 |
| 5/30/2010 10:08:00 | 25.0 | 1/24/2011 17:49:01 | 26.125 |
| 5/30/2010 10:43:00 | 25.0 | 1/24/2011 18:25:01 | 26.125 |
| 5/30/2010 11:18:00 | 25.0 | 1/24/2011 19:01:01 | 25.625 |
| 5/30/2010 11:53:00 | 25.0 | 1/24/2011 19:37:01 | 25.625 |

|                    |      |                    |        |
|--------------------|------|--------------------|--------|
| 5/30/2010 12:28:00 | 25.0 | 1/24/2011 20:13:01 | 26.125 |
| 5/30/2010 13:03:00 | 25.0 | 1/24/2011 20:49:01 | 25.625 |
| 5/30/2010 13:38:00 | 25.0 | 1/24/2011 21:25:01 | 25.625 |
| 5/30/2010 14:13:00 | 25.0 | 1/24/2011 22:01:01 | 25.625 |
| 5/30/2010 14:48:00 | 25.0 | 1/24/2011 22:37:01 | 25.625 |
| 5/30/2010 15:23:00 | 25.0 | 1/24/2011 23:13:01 | 25.625 |
| 5/30/2010 15:58:00 | 25.5 | 1/24/2011 23:49:01 | 26.125 |
| 5/30/2010 16:33:00 | 25.5 | 1/25/2011 00:25:01 | 26.125 |
| 5/30/2010 17:08:00 | 25.5 | 1/25/2011 01:01:01 | 26.125 |
| 5/30/2010 17:43:00 | 25.5 | 1/25/2011 01:37:01 | 26.125 |
| 5/30/2010 18:18:00 | 25.5 | 1/25/2011 02:13:01 | 25.625 |
| 5/30/2010 18:53:00 | 25.5 | 1/25/2011 02:49:01 | 25.625 |
| 5/30/2010 19:28:00 | 25.5 | 1/25/2011 03:25:01 | 25.625 |
| 5/30/2010 20:03:00 | 25.5 | 1/25/2011 04:01:01 | 25.625 |
| 5/30/2010 20:38:00 | 25.5 | 1/25/2011 04:37:01 | 25.625 |
| 5/30/2010 21:13:00 | 25.5 | 1/25/2011 05:13:01 | 25.625 |
| 5/30/2010 21:48:00 | 25.5 | 1/25/2011 05:49:01 | 26.125 |
| 5/30/2010 22:23:00 | 25.5 | 1/25/2011 06:25:01 | 26.125 |
| 5/30/2010 22:58:00 | 25.5 | 1/25/2011 07:01:01 | 26.125 |
| 5/30/2010 23:33:00 | 25.5 | 1/25/2011 07:37:01 | 26.125 |
| 5/31/2010 00:08:00 | 25.5 | 1/25/2011 08:13:01 | 26.125 |
| 5/31/2010 00:43:00 | 25.5 | 1/25/2011 08:49:01 | 26.125 |
| 5/31/2010 01:18:00 | 25.5 | 1/25/2011 09:25:01 | 26.125 |
| 5/31/2010 01:53:00 | 25.5 | 1/25/2011 10:01:01 | 25.625 |
| 5/31/2010 02:28:00 | 25.5 | 1/25/2011 10:37:01 | 25.625 |
| 5/31/2010 03:03:00 | 25.5 | 1/25/2011 11:13:01 | 25.625 |
| 5/31/2010 03:38:00 | 25.0 | 1/25/2011 11:49:01 | 25.625 |
| 5/31/2010 04:13:00 | 25.0 | 1/25/2011 12:25:01 | 25.625 |
| 5/31/2010 04:48:00 | 25.0 | 1/25/2011 13:01:01 | 25.625 |
| 5/31/2010 05:23:00 | 25.0 | 1/25/2011 13:37:01 | 25.625 |
| 5/31/2010 05:58:00 | 25.0 | 1/25/2011 14:13:01 | 25.625 |
| 5/31/2010 06:33:00 | 25.0 | 1/25/2011 14:49:01 | 25.625 |
| 5/31/2010 07:08:00 | 25.0 | 1/25/2011 15:25:01 | 25.625 |
| 5/31/2010 07:43:00 | 25.0 | 1/25/2011 16:01:01 | 25.625 |
| 5/31/2010 08:18:00 | 25.0 | 1/25/2011 16:37:01 | 26.125 |
| 5/31/2010 08:53:00 | 25.0 | 1/25/2011 17:13:01 | 26.125 |
| 5/31/2010 09:28:00 | 25.0 | 1/25/2011 17:49:01 | 26.125 |
| 5/31/2010 10:03:00 | 25.0 | 1/25/2011 18:25:01 | 26.125 |
| 5/31/2010 10:38:00 | 25.0 | 1/25/2011 19:01:01 | 26.125 |
| 5/31/2010 11:13:00 | 25.0 | 1/25/2011 19:37:01 | 26.125 |
| 5/31/2010 11:48:00 | 25.0 | 1/25/2011 20:13:01 | 26.125 |
| 5/31/2010 12:23:00 | 25.0 | 1/25/2011 20:49:01 | 26.125 |
| 5/31/2010 12:58:00 | 25.0 | 1/25/2011 21:25:01 | 26.125 |
| 5/31/2010 13:33:00 | 25.0 | 1/25/2011 22:01:01 | 26.125 |
| 5/31/2010 14:08:00 | 25.0 | 1/25/2011 22:37:01 | 26.125 |
| 5/31/2010 14:43:00 | 25.0 | 1/25/2011 23:13:01 | 26.125 |
| 5/31/2010 15:18:00 | 25.0 | 1/25/2011 23:49:01 | 26.125 |
| 5/31/2010 15:53:00 | 25.0 | 1/26/2011 00:25:01 | 26.125 |
| 5/31/2010 16:28:00 | 25.0 | 1/26/2011 01:01:01 | 26.125 |
| 5/31/2010 17:03:00 | 25.0 | 1/26/2011 01:37:01 | 25.625 |

|                    |      |                    |        |
|--------------------|------|--------------------|--------|
| 5/31/2010 17:38:00 | 25.0 | 1/26/2011 02:13:01 | 25.625 |
| 5/31/2010 18:13:00 | 25.0 | 1/26/2011 02:49:01 | 25.625 |
| 5/31/2010 18:48:00 | 25.0 | 1/26/2011 03:25:01 | 25.625 |
| 5/31/2010 19:23:00 | 25.0 | 1/26/2011 04:01:01 | 26.125 |
| 5/31/2010 19:58:00 | 25.0 | 1/26/2011 04:37:01 | 26.125 |
| 5/31/2010 20:33:00 | 25.0 | 1/26/2011 05:13:01 | 26.125 |
| 5/31/2010 21:08:00 | 25.0 | 1/26/2011 05:49:01 | 26.125 |
| 5/31/2010 21:43:00 | 25.0 | 1/26/2011 06:25:01 | 26.125 |
| 5/31/2010 22:18:00 | 25.0 | 1/26/2011 07:01:01 | 26.125 |
| 5/31/2010 22:53:00 | 25.0 | 1/26/2011 07:37:01 | 26.125 |
| 5/31/2010 23:28:00 | 25.0 | 1/26/2011 08:13:01 | 26.125 |
| 6/1/2010 00:03:00  | 25.0 | 1/26/2011 08:49:01 | 26.125 |
| 6/1/2010 00:38:00  | 25.0 | 1/26/2011 09:25:01 | 26.125 |
| 6/1/2010 01:13:00  | 25.0 | 1/26/2011 10:01:01 | 26.125 |
| 6/1/2010 01:48:00  | 25.0 | 1/26/2011 10:37:01 | 26.125 |
| 6/1/2010 02:23:00  | 25.0 | 1/26/2011 11:13:01 | 25.625 |
| 6/1/2010 02:58:00  | 25.0 | 1/26/2011 11:49:01 | 25.625 |
| 6/1/2010 03:33:00  | 25.0 | 1/26/2011 12:25:01 | 25.625 |
| 6/1/2010 04:08:00  | 25.0 | 1/26/2011 13:01:01 | 25.625 |
| 6/1/2010 04:43:00  | 25.0 | 1/26/2011 13:37:01 | 25.625 |
| 6/1/2010 05:18:00  | 25.0 | 1/26/2011 14:13:01 | 25.625 |
| 6/1/2010 05:53:00  | 25.0 | 1/26/2011 14:49:01 | 25.625 |
| 6/1/2010 06:28:00  | 25.0 | 1/26/2011 15:25:01 | 25.625 |
| 6/1/2010 07:03:00  | 25.0 | 1/26/2011 16:01:01 | 25.625 |
| 6/1/2010 07:38:00  | 25.0 | 1/26/2011 16:37:01 | 25.625 |
| 6/1/2010 08:13:00  | 25.0 | 1/26/2011 17:13:01 | 25.625 |
| 6/1/2010 08:48:00  | 25.0 | 1/26/2011 17:49:01 | 25.625 |
| 6/1/2010 09:23:00  | 25.0 | 1/26/2011 18:25:01 | 25.625 |
| 6/1/2010 09:58:00  | 25.0 | 1/26/2011 19:01:01 | 25.625 |
| 6/1/2010 10:33:00  | 25.0 | 1/26/2011 19:37:01 | 25.625 |
| 6/1/2010 11:08:00  | 25.0 | 1/26/2011 20:13:01 | 25.625 |
| 6/1/2010 11:43:00  | 25.0 | 1/26/2011 20:49:01 | 25.625 |
| 6/1/2010 12:18:00  | 25.0 | 1/26/2011 21:25:01 | 25.625 |
| 6/1/2010 12:53:00  | 25.0 | 1/26/2011 22:01:01 | 25.625 |
| 6/1/2010 13:28:00  | 25.0 | 1/26/2011 22:37:01 | 25.625 |
| 6/1/2010 14:03:00  | 25.0 | 1/26/2011 23:13:01 | 25.625 |
| 6/1/2010 14:38:00  | 25.0 | 1/26/2011 23:49:01 | 25.625 |
| 6/1/2010 15:13:00  | 25.0 | 1/27/2011 00:25:01 | 25.625 |
| 6/1/2010 15:48:00  | 25.0 | 1/27/2011 01:01:01 | 25.625 |
| 6/1/2010 16:23:00  | 25.0 | 1/27/2011 01:37:01 | 25.625 |
| 6/1/2010 16:58:00  | 25.0 | 1/27/2011 02:13:01 | 25.625 |
| 6/1/2010 17:33:00  | 25.0 | 1/27/2011 02:49:01 | 25.625 |
| 6/1/2010 18:08:00  | 25.0 | 1/27/2011 03:25:01 | 25.625 |
| 6/1/2010 18:43:00  | 25.0 | 1/27/2011 04:01:01 | 25.625 |
| 6/1/2010 19:18:00  | 25.0 | 1/27/2011 04:37:01 | 25.625 |
| 6/1/2010 19:53:00  | 25.0 | 1/27/2011 05:13:01 | 25.625 |
| 6/1/2010 20:28:00  | 25.0 | 1/27/2011 05:49:01 | 25.625 |
| 6/1/2010 21:03:00  | 25.0 | 1/27/2011 06:25:01 | 25.625 |
| 6/1/2010 21:38:00  | 25.0 | 1/27/2011 07:01:01 | 25.625 |
| 6/1/2010 22:13:00  | 25.0 | 1/27/2011 07:37:01 | 25.625 |

|                   |      |                    |        |
|-------------------|------|--------------------|--------|
| 6/1/2010 22:48:00 | 25.0 | 1/27/2011 08:13:01 | 25.625 |
| 6/1/2010 23:23:00 | 25.0 | 1/27/2011 08:49:01 | 25.625 |
| 6/1/2010 23:58:00 | 25.0 | 1/27/2011 09:25:01 | 26.125 |
| 6/2/2010 00:33:00 | 25.0 | 1/27/2011 10:01:01 | 26.125 |
| 6/2/2010 01:08:00 | 25.0 | 1/27/2011 10:37:01 | 26.125 |
| 6/2/2010 01:43:00 | 25.0 | 1/27/2011 11:13:01 | 26.125 |
| 6/2/2010 02:18:00 | 25.0 | 1/27/2011 11:49:01 | 25.625 |
| 6/2/2010 02:53:00 | 25.0 | 1/27/2011 12:25:01 | 25.625 |
| 6/2/2010 03:28:00 | 25.0 | 1/27/2011 13:01:01 | 25.625 |
| 6/2/2010 04:03:00 | 25.0 | 1/27/2011 13:37:01 | 25.625 |
| 6/2/2010 04:38:00 | 25.0 | 1/27/2011 14:13:01 | 25.625 |
| 6/2/2010 05:13:00 | 25.0 | 1/27/2011 14:49:01 | 25.625 |
| 6/2/2010 05:48:00 | 25.0 | 1/27/2011 15:25:01 | 25.625 |
| 6/2/2010 06:23:00 | 25.0 | 1/27/2011 16:01:01 | 25.625 |
| 6/2/2010 06:58:00 | 25.0 | 1/27/2011 16:37:01 | 25.625 |
| 6/2/2010 07:33:00 | 25.0 | 1/27/2011 17:13:01 | 25.625 |
| 6/2/2010 08:08:00 | 25.0 | 1/27/2011 17:49:01 | 25.625 |
| 6/2/2010 08:43:00 | 25.0 | 1/27/2011 18:25:01 | 25.625 |
| 6/2/2010 09:18:00 | 25.0 | 1/27/2011 19:01:01 | 25.625 |
| 6/2/2010 09:53:00 | 25.0 | 1/27/2011 19:37:01 | 25.625 |
| 6/2/2010 10:28:00 | 25.0 | 1/27/2011 20:13:01 | 25.625 |
| 6/2/2010 11:03:00 | 25.0 | 1/27/2011 20:49:01 | 25.625 |
| 6/2/2010 11:38:00 | 25.0 | 1/27/2011 21:25:01 | 25.625 |
| 6/2/2010 12:13:00 | 25.0 | 1/27/2011 22:01:01 | 25.126 |
| 6/2/2010 12:48:00 | 25.0 | 1/27/2011 22:37:01 | 25.126 |
| 6/2/2010 13:23:00 | 25.0 | 1/27/2011 23:13:01 | 25.126 |
| 6/2/2010 13:58:00 | 25.0 | 1/27/2011 23:49:01 | 25.126 |
| 6/2/2010 14:33:00 | 25.0 | 1/28/2011 00:25:01 | 25.126 |
| 6/2/2010 15:08:00 | 25.0 | 1/28/2011 01:01:01 | 25.126 |
| 6/2/2010 15:43:00 | 25.0 | 1/28/2011 01:37:01 | 25.126 |
| 6/2/2010 16:18:00 | 25.0 | 1/28/2011 02:13:01 | 25.126 |
| 6/2/2010 16:53:00 | 25.0 | 1/28/2011 02:49:01 | 25.126 |
| 6/2/2010 17:28:00 | 25.0 | 1/28/2011 03:25:01 | 25.126 |
| 6/2/2010 18:03:00 | 25.0 | 1/28/2011 04:01:01 | 25.126 |
| 6/2/2010 18:38:00 | 25.0 | 1/28/2011 04:37:01 | 25.126 |
| 6/2/2010 19:13:00 | 25.0 | 1/28/2011 05:13:01 | 25.126 |
| 6/2/2010 19:48:00 | 25.0 | 1/28/2011 05:49:01 | 25.126 |
| 6/2/2010 20:23:00 | 25.0 | 1/28/2011 06:25:01 | 25.126 |
| 6/2/2010 20:58:00 | 25.0 | 1/28/2011 07:01:01 | 25.126 |
| 6/2/2010 21:33:00 | 25.0 | 1/28/2011 07:37:01 | 25.126 |
| 6/2/2010 22:08:00 | 25.0 | 1/28/2011 08:13:01 | 25.126 |
| 6/2/2010 22:43:00 | 25.0 | 1/28/2011 08:49:01 | 25.126 |
| 6/2/2010 23:18:00 | 25.0 | 1/28/2011 09:25:01 | 25.126 |
| 6/2/2010 23:53:00 | 25.0 | 1/28/2011 10:01:01 | 25.126 |
| 6/3/2010 00:28:00 | 25.0 | 1/28/2011 10:37:01 | 25.126 |
| 6/3/2010 01:03:00 | 25.0 | 1/28/2011 11:13:01 | 25.126 |
| 6/3/2010 01:38:00 | 25.0 | 1/28/2011 11:49:01 | 25.126 |
| 6/3/2010 02:13:00 | 25.0 | 1/28/2011 12:25:01 | 25.126 |
| 6/3/2010 02:48:00 | 25.0 | 1/28/2011 13:01:01 | 25.126 |
| 6/3/2010 03:23:00 | 25.0 | 1/28/2011 13:37:01 | 25.126 |

|                   |      |                    |        |
|-------------------|------|--------------------|--------|
| 6/3/2010 03:58:00 | 25.0 | 1/28/2011 14:13:01 | 25.126 |
| 6/3/2010 04:33:00 | 25.0 | 1/28/2011 14:49:01 | 25.126 |
| 6/3/2010 05:08:00 | 25.0 | 1/28/2011 15:25:01 | 25.126 |
| 6/3/2010 05:43:00 | 25.0 | 1/28/2011 16:01:01 | 25.126 |
| 6/3/2010 06:18:00 | 25.0 | 1/28/2011 16:37:01 | 25.126 |
| 6/3/2010 06:53:00 | 25.0 | 1/28/2011 17:13:01 | 25.126 |
| 6/3/2010 07:28:00 | 25.0 | 1/28/2011 17:49:01 | 25.126 |
| 6/3/2010 08:03:00 | 25.0 | 1/28/2011 18:25:01 | 25.126 |
| 6/3/2010 08:38:00 | 25.0 | 1/28/2011 19:01:01 | 25.126 |
| 6/3/2010 09:13:00 | 25.0 | 1/28/2011 19:37:01 | 25.126 |
| 6/3/2010 09:48:00 | 25.0 | 1/28/2011 20:13:01 | 25.126 |
| 6/3/2010 10:23:00 | 25.0 | 1/28/2011 20:49:01 | 25.126 |
| 6/3/2010 10:58:00 | 25.0 | 1/28/2011 21:25:01 | 25.126 |
| 6/3/2010 11:33:00 | 25.0 | 1/28/2011 22:01:01 | 25.126 |
| 6/3/2010 12:08:00 | 25.0 | 1/28/2011 22:37:01 | 25.126 |
| 6/3/2010 12:43:00 | 25.0 | 1/28/2011 23:13:01 | 25.126 |
| 6/3/2010 13:18:00 | 25.0 | 1/28/2011 23:49:01 | 25.126 |
| 6/3/2010 13:53:00 | 25.0 | 1/29/2011 00:25:01 | 25.126 |
| 6/3/2010 14:28:00 | 25.0 | 1/29/2011 01:01:01 | 25.126 |
| 6/3/2010 15:03:00 | 25.0 | 1/29/2011 01:37:01 | 25.126 |
| 6/3/2010 15:38:00 | 25.0 | 1/29/2011 02:13:01 | 25.126 |
| 6/3/2010 16:13:00 | 25.0 | 1/29/2011 02:49:01 | 25.126 |
| 6/3/2010 16:48:00 | 25.0 | 1/29/2011 03:25:01 | 25.126 |
| 6/3/2010 17:23:00 | 25.0 | 1/29/2011 04:01:01 | 25.126 |
| 6/3/2010 17:58:00 | 25.0 | 1/29/2011 04:37:01 | 25.126 |
| 6/3/2010 18:33:00 | 25.0 | 1/29/2011 05:13:01 | 25.126 |
| 6/3/2010 19:08:00 | 25.0 | 1/29/2011 05:49:01 | 25.126 |
| 6/3/2010 19:43:00 | 25.0 | 1/29/2011 06:25:01 | 25.126 |
| 6/3/2010 20:18:00 | 25.0 | 1/29/2011 07:01:01 | 25.126 |
| 6/3/2010 20:53:00 | 25.0 | 1/29/2011 07:37:01 | 25.126 |
| 6/3/2010 21:28:00 | 25.0 | 1/29/2011 08:13:01 | 25.126 |
| 6/3/2010 22:03:00 | 25.0 | 1/29/2011 08:49:01 | 25.126 |
| 6/3/2010 22:38:00 | 25.0 | 1/29/2011 09:25:01 | 25.126 |
| 6/3/2010 23:13:00 | 25.0 | 1/29/2011 10:01:01 | 25.126 |
| 6/3/2010 23:48:00 | 25.0 | 1/29/2011 10:37:01 | 25.126 |
| 6/4/2010 00:23:00 | 25.0 | 1/29/2011 11:13:01 | 25.126 |
| 6/4/2010 00:58:00 | 25.0 | 1/29/2011 11:49:01 | 25.126 |
| 6/4/2010 01:33:00 | 25.0 | 1/29/2011 12:25:01 | 25.126 |
| 6/4/2010 02:08:00 | 25.0 | 1/29/2011 13:01:01 | 25.126 |
| 6/4/2010 02:43:00 | 25.0 | 1/29/2011 13:37:01 | 25.126 |
| 6/4/2010 03:18:00 | 25.0 | 1/29/2011 14:13:01 | 25.625 |
| 6/4/2010 03:53:00 | 25.0 | 1/29/2011 14:49:01 | 25.625 |
| 6/4/2010 04:28:00 | 25.0 | 1/29/2011 15:25:01 | 25.126 |
| 6/4/2010 05:03:00 | 25.0 | 1/29/2011 16:01:01 | 25.126 |
| 6/4/2010 05:38:00 | 25.0 | 1/29/2011 16:37:01 | 25.126 |
| 6/4/2010 06:13:00 | 25.0 | 1/29/2011 17:13:01 | 25.126 |
| 6/4/2010 06:48:00 | 25.0 | 1/29/2011 17:49:01 | 25.126 |
| 6/4/2010 07:23:00 | 25.0 | 1/29/2011 18:25:01 | 25.126 |
| 6/4/2010 07:58:00 | 24.5 | 1/29/2011 19:01:01 | 25.126 |
| 6/4/2010 08:33:00 | 24.5 | 1/29/2011 19:37:01 | 25.126 |

|                   |      |                    |        |
|-------------------|------|--------------------|--------|
| 6/4/2010 09:08:00 | 24.5 | 1/29/2011 20:13:01 | 25.126 |
| 6/4/2010 09:43:00 | 24.5 | 1/29/2011 20:49:01 | 25.126 |
| 6/4/2010 10:18:00 | 24.5 | 1/29/2011 21:25:01 | 25.126 |
| 6/4/2010 10:53:00 | 24.5 | 1/29/2011 22:01:01 | 25.126 |
| 6/4/2010 11:28:00 | 24.5 | 1/29/2011 22:37:01 | 25.126 |
| 6/4/2010 12:03:00 | 24.5 | 1/29/2011 23:13:01 | 25.126 |
| 6/4/2010 12:38:00 | 24.5 | 1/29/2011 23:49:01 | 25.126 |
| 6/4/2010 13:13:00 | 24.5 | 1/30/2011 00:25:01 | 25.625 |
| 6/4/2010 13:48:00 | 24.5 | 1/30/2011 01:01:01 | 25.625 |
| 6/4/2010 14:23:00 | 24.5 | 1/30/2011 01:37:01 | 25.625 |
| 6/4/2010 14:58:00 | 24.5 | 1/30/2011 02:13:01 | 25.625 |
| 6/4/2010 15:33:00 | 24.5 | 1/30/2011 02:49:01 | 25.625 |
| 6/4/2010 16:08:00 | 24.5 | 1/30/2011 03:25:01 | 25.625 |
| 6/4/2010 16:43:00 | 24.5 | 1/30/2011 04:01:01 | 25.126 |
| 6/4/2010 17:18:00 | 24.5 | 1/30/2011 04:37:01 | 25.126 |
| 6/4/2010 17:53:00 | 24.5 | 1/30/2011 05:13:01 | 25.126 |
| 6/4/2010 18:28:00 | 24.5 | 1/30/2011 05:49:01 | 25.126 |
| 6/4/2010 19:03:00 | 25.0 | 1/30/2011 06:25:01 | 25.126 |
| 6/4/2010 19:38:00 | 25.0 | 1/30/2011 07:01:01 | 25.126 |
| 6/4/2010 20:13:00 | 25.0 | 1/30/2011 07:37:01 | 25.126 |
| 6/4/2010 20:48:00 | 25.0 | 1/30/2011 08:13:01 | 25.126 |
| 6/4/2010 21:23:00 | 25.0 | 1/30/2011 08:49:01 | 24.626 |
| 6/4/2010 21:58:00 | 25.0 | 1/30/2011 09:25:01 | 24.626 |
| 6/4/2010 22:33:00 | 25.0 | 1/30/2011 10:01:01 | 24.626 |
| 6/4/2010 23:08:00 | 25.0 | 1/30/2011 10:37:01 | 24.626 |
| 6/4/2010 23:43:00 | 25.0 | 1/30/2011 11:13:01 | 24.626 |
| 6/5/2010 00:18:00 | 25.0 | 1/30/2011 11:49:01 | 24.626 |
| 6/5/2010 00:53:00 | 25.0 | 1/30/2011 12:25:01 | 24.626 |
| 6/5/2010 01:28:00 | 24.5 | 1/30/2011 13:01:01 | 24.626 |
| 6/5/2010 02:03:00 | 24.5 | 1/30/2011 13:37:01 | 24.626 |
| 6/5/2010 02:38:00 | 24.5 | 1/30/2011 14:13:01 | 24.626 |
| 6/5/2010 03:13:00 | 24.5 | 1/30/2011 14:49:01 | 24.626 |
| 6/5/2010 03:48:00 | 24.5 | 1/30/2011 15:25:01 | 24.626 |
| 6/5/2010 04:23:00 | 24.5 | 1/30/2011 16:01:01 | 24.626 |
| 6/5/2010 04:58:00 | 24.5 | 1/30/2011 16:37:01 | 24.626 |
| 6/5/2010 05:33:00 | 24.5 | 1/30/2011 17:13:01 | 25.126 |
| 6/5/2010 06:08:00 | 24.5 | 1/30/2011 17:49:01 | 25.126 |
| 6/5/2010 06:43:00 | 24.5 | 1/30/2011 18:25:01 | 25.126 |
| 6/5/2010 07:18:00 | 24.5 | 1/30/2011 19:01:01 | 25.126 |
| 6/5/2010 07:53:00 | 24.5 | 1/30/2011 19:37:01 | 25.126 |
| 6/5/2010 08:28:00 | 24.5 | 1/30/2011 20:13:01 | 24.626 |
| 6/5/2010 09:03:00 | 24.5 | 1/30/2011 20:49:01 | 24.626 |
| 6/5/2010 09:38:00 | 24.5 | 1/30/2011 21:25:01 | 24.626 |
| 6/5/2010 10:13:00 | 24.5 | 1/30/2011 22:01:01 | 24.626 |
| 6/5/2010 10:48:00 | 24.5 | 1/30/2011 22:37:01 | 24.626 |
| 6/5/2010 11:23:00 | 24.5 | 1/30/2011 23:13:01 | 24.626 |
| 6/5/2010 11:58:00 | 24.5 | 1/30/2011 23:49:01 | 24.626 |
| 6/5/2010 12:33:00 | 24.5 | 1/31/2011 00:25:01 | 24.626 |
| 6/5/2010 13:08:00 | 24.5 | 1/31/2011 01:01:01 | 24.626 |
| 6/5/2010 13:43:00 | 24.5 | 1/31/2011 01:37:01 | 24.626 |



|                   |      |                    |        |
|-------------------|------|--------------------|--------|
| 6/5/2010 14:18:00 | 24.5 | 1/31/2011 02:13:01 | 24.626 |
| 6/5/2010 14:53:00 | 24.5 | 1/31/2011 02:49:01 | 24.626 |
| 6/5/2010 15:28:00 | 24.5 | 1/31/2011 03:25:01 | 24.626 |
| 6/5/2010 16:03:00 | 24.5 | 1/31/2011 04:01:01 | 24.626 |
| 6/5/2010 16:38:00 | 24.5 | 1/31/2011 04:37:01 | 25.126 |
| 6/5/2010 17:13:00 | 24.5 | 1/31/2011 05:13:01 | 25.126 |
| 6/5/2010 17:48:00 | 25.0 | 1/31/2011 05:49:01 | 25.126 |
| 6/5/2010 18:23:00 | 25.0 | 1/31/2011 06:25:01 | 25.126 |
| 6/5/2010 18:58:00 | 25.0 | 1/31/2011 07:01:01 | 25.126 |
| 6/5/2010 19:33:00 | 25.0 | 1/31/2011 07:37:01 | 25.126 |
| 6/5/2010 20:08:00 | 25.0 | 1/31/2011 08:13:01 | 25.126 |
| 6/5/2010 20:43:00 | 25.0 | 1/31/2011 08:49:01 | 25.126 |
| 6/5/2010 21:18:00 | 25.0 | 1/31/2011 09:25:01 | 24.626 |
| 6/5/2010 21:53:00 | 25.0 | 1/31/2011 10:01:01 | 24.626 |
| 6/5/2010 22:28:00 | 25.0 | 1/31/2011 10:37:01 | 24.626 |
| 6/5/2010 23:03:00 | 25.0 | 1/31/2011 11:13:01 | 24.626 |
| 6/5/2010 23:38:00 | 25.0 | 1/31/2011 11:49:01 | 24.626 |
| 6/6/2010 00:13:00 | 25.0 | 1/31/2011 12:25:01 | 24.626 |
| 6/6/2010 00:48:00 | 25.0 | 1/31/2011 13:01:01 | 24.626 |
| 6/6/2010 01:23:00 | 25.0 | 1/31/2011 13:37:01 | 24.626 |
| 6/6/2010 01:58:00 | 25.0 | 1/31/2011 14:13:01 | 24.626 |
| 6/6/2010 02:33:00 | 25.0 | 1/31/2011 14:49:01 | 24.626 |
| 6/6/2010 03:08:00 | 25.0 | 1/31/2011 15:25:01 | 25.126 |
| 6/6/2010 03:43:00 | 25.0 | 1/31/2011 16:01:01 | 25.126 |
| 6/6/2010 04:18:00 | 25.0 | 1/31/2011 16:37:01 | 24.626 |
| 6/6/2010 04:53:00 | 25.0 | 1/31/2011 17:13:01 | 24.626 |
| 6/6/2010 05:28:00 | 25.0 | 1/31/2011 17:49:01 | 25.126 |
| 6/6/2010 06:03:00 | 25.0 | 1/31/2011 18:25:01 | 25.126 |
| 6/6/2010 06:38:00 | 25.0 | 1/31/2011 19:01:01 | 24.626 |
| 6/6/2010 07:13:00 | 24.5 | 1/31/2011 19:37:01 | 24.626 |
| 6/6/2010 07:48:00 | 24.5 | 1/31/2011 20:13:01 | 24.626 |
| 6/6/2010 08:23:00 | 24.5 | 1/31/2011 20:49:01 | 24.626 |
| 6/6/2010 08:58:00 | 24.5 | 1/31/2011 21:25:01 | 24.626 |
| 6/6/2010 09:33:00 | 24.5 | 1/31/2011 22:01:01 | 24.626 |
| 6/6/2010 10:08:00 | 24.5 | 1/31/2011 22:37:01 | 24.626 |
| 6/6/2010 10:43:00 | 24.5 | 1/31/2011 23:13:01 | 24.626 |
| 6/6/2010 11:18:00 | 24.5 | 1/31/2011 23:49:01 | 24.626 |
| 6/6/2010 11:53:00 | 24.5 | 2/1/2011 00:25:01  | 25.126 |
| 6/6/2010 12:28:00 | 24.5 | 2/1/2011 01:01:01  | 25.126 |
| 6/6/2010 13:03:00 | 24.5 | 2/1/2011 01:37:01  | 25.126 |
| 6/6/2010 13:38:00 | 24.5 | 2/1/2011 02:13:01  | 25.126 |
| 6/6/2010 14:13:00 | 25.0 | 2/1/2011 02:49:01  | 25.126 |
| 6/6/2010 14:48:00 | 25.0 | 2/1/2011 03:25:01  | 25.126 |
| 6/6/2010 15:23:00 | 25.0 | 2/1/2011 04:01:01  | 25.126 |
| 6/6/2010 15:58:00 | 25.0 | 2/1/2011 04:37:01  | 25.126 |
| 6/6/2010 16:33:00 | 25.0 | 2/1/2011 05:13:01  | 25.126 |
| 6/6/2010 17:08:00 | 25.0 | 2/1/2011 05:49:01  | 25.126 |
| 6/6/2010 17:43:00 | 25.0 | 2/1/2011 06:25:01  | 25.126 |
| 6/6/2010 18:18:00 | 25.0 | 2/1/2011 07:01:01  | 25.126 |
| 6/6/2010 18:53:00 | 25.0 | 2/1/2011 07:37:01  | 25.126 |

|                   |      |                   |        |
|-------------------|------|-------------------|--------|
| 6/6/2010 19:28:00 | 25.0 | 2/1/2011 08:13:01 | 25.126 |
| 6/6/2010 20:03:00 | 25.0 | 2/1/2011 08:49:01 | 25.126 |
| 6/6/2010 20:38:00 | 25.0 | 2/1/2011 09:25:01 | 25.126 |
| 6/6/2010 21:13:00 | 25.0 | 2/1/2011 10:01:01 | 25.126 |
| 6/6/2010 21:48:00 | 25.0 | 2/1/2011 10:37:01 | 25.126 |
| 6/6/2010 22:23:00 | 25.0 | 2/1/2011 11:13:01 | 25.126 |
| 6/6/2010 22:58:00 | 25.0 | 2/1/2011 11:49:01 | 25.126 |
| 6/6/2010 23:33:00 | 25.0 | 2/1/2011 12:25:01 | 25.126 |
| 6/7/2010 00:08:00 | 25.0 | 2/1/2011 13:01:01 | 25.126 |
| 6/7/2010 00:43:00 | 25.0 | 2/1/2011 13:37:01 | 25.126 |
| 6/7/2010 01:18:00 | 25.0 | 2/1/2011 14:13:01 | 25.126 |
| 6/7/2010 01:53:00 | 25.0 | 2/1/2011 14:49:01 | 25.126 |
| 6/7/2010 02:28:00 | 25.0 | 2/1/2011 15:25:01 | 25.126 |
| 6/7/2010 03:03:00 | 25.0 | 2/1/2011 16:01:01 | 25.126 |
| 6/7/2010 03:38:00 | 25.0 | 2/1/2011 16:37:01 | 25.625 |
| 6/7/2010 04:13:00 | 25.0 | 2/1/2011 17:13:01 | 25.625 |
| 6/7/2010 04:48:00 | 25.0 | 2/1/2011 17:49:01 | 25.625 |
| 6/7/2010 05:23:00 | 25.0 | 2/1/2011 18:25:01 | 25.126 |
| 6/7/2010 05:58:00 | 25.0 | 2/1/2011 19:01:01 | 25.126 |
| 6/7/2010 06:33:00 | 25.0 | 2/1/2011 19:37:01 | 25.126 |
| 6/7/2010 07:08:00 | 25.0 | 2/1/2011 20:13:01 | 25.126 |
| 6/7/2010 07:43:00 | 25.0 | 2/1/2011 20:49:01 | 25.126 |
| 6/7/2010 08:18:00 | 25.0 | 2/1/2011 21:25:01 | 25.126 |
| 6/7/2010 08:53:00 | 25.0 | 2/1/2011 22:01:01 | 25.126 |
| 6/7/2010 09:28:00 | 24.5 | 2/1/2011 22:37:01 | 25.126 |
| 6/7/2010 10:03:00 | 24.5 | 2/1/2011 23:13:01 | 25.126 |
| 6/7/2010 10:38:00 | 24.5 | 2/1/2011 23:49:01 | 25.126 |
| 6/7/2010 11:13:00 | 24.5 | 2/2/2011 00:25:01 | 25.126 |
| 6/7/2010 11:48:00 | 24.5 | 2/2/2011 01:01:01 | 25.126 |
| 6/7/2010 12:23:00 | 24.5 | 2/2/2011 01:37:01 | 25.126 |
| 6/7/2010 12:58:00 | 24.5 | 2/2/2011 02:13:01 | 25.126 |
| 6/7/2010 13:33:00 | 24.5 | 2/2/2011 02:49:01 | 25.126 |
| 6/7/2010 14:08:00 | 24.5 | 2/2/2011 03:25:01 | 25.126 |
| 6/7/2010 14:43:00 | 25.0 | 2/2/2011 04:01:01 | 25.126 |
| 6/7/2010 15:18:00 | 25.0 | 2/2/2011 04:37:01 | 25.126 |
| 6/7/2010 15:53:00 | 25.0 | 2/2/2011 05:13:01 | 25.126 |
| 6/7/2010 16:28:00 | 25.0 | 2/2/2011 05:49:01 | 25.126 |
| 6/7/2010 17:03:00 | 25.0 | 2/2/2011 06:25:01 | 25.126 |
| 6/7/2010 17:38:00 | 25.0 | 2/2/2011 07:01:01 | 25.126 |
| 6/7/2010 18:13:00 | 25.0 | 2/2/2011 07:37:01 | 25.126 |
| 6/7/2010 18:48:00 | 25.0 | 2/2/2011 08:13:01 | 25.126 |
| 6/7/2010 19:23:00 | 25.0 | 2/2/2011 08:49:01 | 25.126 |
| 6/7/2010 19:58:00 | 25.0 | 2/2/2011 09:25:01 | 25.126 |
| 6/7/2010 20:33:00 | 25.0 | 2/2/2011 10:01:01 | 25.126 |
| 6/7/2010 21:08:00 | 25.0 | 2/2/2011 10:37:01 | 25.126 |
| 6/7/2010 21:43:00 | 25.0 | 2/2/2011 11:13:01 | 25.126 |
| 6/7/2010 22:18:00 | 25.0 | 2/2/2011 11:49:01 | 25.126 |
| 6/7/2010 22:53:00 | 25.0 | 2/2/2011 12:25:01 | 25.126 |
| 6/7/2010 23:28:00 | 25.0 | 2/2/2011 13:01:01 | 25.126 |
| 6/8/2010 00:03:00 | 25.0 | 2/2/2011 13:37:01 | 25.126 |

|                   |      |                   |        |
|-------------------|------|-------------------|--------|
| 6/8/2010 00:38:00 | 25.0 | 2/2/2011 14:13:01 | 25.126 |
| 6/8/2010 01:13:00 | 25.0 | 2/2/2011 14:49:01 | 25.126 |
| 6/8/2010 01:48:00 | 25.0 | 2/2/2011 15:25:01 | 25.126 |
| 6/8/2010 02:23:00 | 25.0 | 2/2/2011 16:01:01 | 25.126 |
| 6/8/2010 02:58:00 | 25.0 | 2/2/2011 16:37:01 | 25.126 |
| 6/8/2010 03:33:00 | 25.0 | 2/2/2011 17:13:01 | 25.126 |
| 6/8/2010 04:08:00 | 25.0 | 2/2/2011 17:49:01 | 25.126 |
| 6/8/2010 04:43:00 | 25.0 | 2/2/2011 18:25:01 | 25.126 |
| 6/8/2010 05:18:00 | 25.0 | 2/2/2011 19:01:01 | 25.126 |
| 6/8/2010 05:53:00 | 25.0 | 2/2/2011 19:37:01 | 25.126 |
| 6/8/2010 06:28:00 | 25.0 | 2/2/2011 20:13:01 | 25.625 |
| 6/8/2010 07:03:00 | 25.0 | 2/2/2011 20:49:01 | 25.625 |
| 6/8/2010 07:38:00 | 25.0 | 2/2/2011 21:25:01 | 26.125 |
| 6/8/2010 08:13:00 | 25.0 | 2/2/2011 22:01:01 | 26.125 |
| 6/8/2010 08:48:00 | 25.0 | 2/2/2011 22:37:01 | 26.125 |
| 6/8/2010 09:23:00 | 24.5 | 2/2/2011 23:13:01 | 26.125 |
| 6/8/2010 09:58:00 | 24.5 | 2/2/2011 23:49:01 | 26.125 |
| 6/8/2010 10:33:00 | 24.5 | 2/3/2011 00:25:01 | 26.125 |
| 6/8/2010 11:08:00 | 25.0 | 2/3/2011 01:01:01 | 26.125 |
| 6/8/2010 11:43:00 | 25.0 | 2/3/2011 01:37:01 | 25.625 |
| 6/8/2010 12:18:00 | 25.0 | 2/3/2011 02:13:01 | 25.625 |
| 6/8/2010 12:53:00 | 24.5 | 2/3/2011 02:49:01 | 25.625 |
| 6/8/2010 13:28:00 | 25.0 | 2/3/2011 03:25:01 | 25.625 |
| 6/8/2010 14:03:00 | 25.0 | 2/3/2011 04:01:01 | 25.625 |
| 6/8/2010 14:38:00 | 25.0 | 2/3/2011 04:37:01 | 25.625 |
| 6/8/2010 15:13:00 | 25.0 | 2/3/2011 05:13:01 | 25.625 |
| 6/8/2010 15:48:00 | 25.0 | 2/3/2011 05:49:01 | 25.625 |
| 6/8/2010 16:23:00 | 25.0 | 2/3/2011 06:25:01 | 25.625 |
| 6/8/2010 16:58:00 | 25.0 | 2/3/2011 07:01:01 | 25.625 |
| 6/8/2010 17:33:00 | 25.0 | 2/3/2011 07:37:01 | 25.625 |
| 6/8/2010 18:08:00 | 25.0 | 2/3/2011 08:13:01 | 25.625 |
| 6/8/2010 18:43:00 | 25.0 | 2/3/2011 08:49:01 | 25.625 |
| 6/8/2010 19:18:00 | 25.0 | 2/3/2011 09:25:01 | 25.625 |
| 6/8/2010 19:53:00 | 25.0 | 2/3/2011 10:01:01 | 25.625 |
| 6/8/2010 20:28:00 | 25.0 | 2/3/2011 10:37:01 | 25.625 |
| 6/8/2010 21:03:00 | 25.0 | 2/3/2011 11:13:01 | 25.625 |
| 6/8/2010 21:38:00 | 25.0 | 2/3/2011 11:49:01 | 25.625 |
| 6/8/2010 22:13:00 | 25.0 | 2/3/2011 12:25:01 | 25.625 |
| 6/8/2010 22:48:00 | 25.0 | 2/3/2011 13:01:01 | 25.625 |
| 6/8/2010 23:23:00 | 25.0 | 2/3/2011 13:37:01 | 25.625 |
| 6/8/2010 23:58:00 | 25.0 | 2/3/2011 14:13:01 | 25.625 |
| 6/9/2010 00:33:00 | 25.0 | 2/3/2011 14:49:01 | 25.625 |
| 6/9/2010 01:08:00 | 25.0 | 2/3/2011 15:25:01 | 25.625 |
| 6/9/2010 01:43:00 | 25.0 | 2/3/2011 16:01:01 | 25.625 |
| 6/9/2010 02:18:00 | 25.0 | 2/3/2011 16:37:01 | 25.625 |
| 6/9/2010 02:53:00 | 25.0 | 2/3/2011 17:13:01 | 25.625 |
| 6/9/2010 03:28:00 | 25.0 | 2/3/2011 17:49:01 | 25.625 |
| 6/9/2010 04:03:00 | 24.5 | 2/3/2011 18:25:01 | 25.625 |
| 6/9/2010 04:38:00 | 24.5 | 2/3/2011 19:01:01 | 25.625 |
| 6/9/2010 05:13:00 | 24.5 | 2/3/2011 19:37:01 | 25.625 |

|                    |      |                   |        |
|--------------------|------|-------------------|--------|
| 6/9/2010 05:48:00  | 24.5 | 2/3/2011 20:13:01 | 25.625 |
| 6/9/2010 06:23:00  | 24.5 | 2/3/2011 20:49:01 | 25.625 |
| 6/9/2010 06:58:00  | 24.5 | 2/3/2011 21:25:01 | 25.625 |
| 6/9/2010 07:33:00  | 24.5 | 2/3/2011 22:01:01 | 25.625 |
| 6/9/2010 08:08:00  | 24.5 | 2/3/2011 22:37:01 | 25.625 |
| 6/9/2010 08:43:00  | 24.5 | 2/3/2011 23:13:01 | 25.625 |
| 6/9/2010 09:18:00  | 24.5 | 2/3/2011 23:49:01 | 25.625 |
| 6/9/2010 09:53:00  | 24.5 | 2/4/2011 00:25:01 | 25.625 |
| 6/9/2010 10:28:00  | 24.5 | 2/4/2011 01:01:01 | 25.625 |
| 6/9/2010 11:03:00  | 24.5 | 2/4/2011 01:37:01 | 25.625 |
| 6/9/2010 11:38:00  | 24.5 | 2/4/2011 02:13:01 | 25.625 |
| 6/9/2010 12:13:00  | 24.5 | 2/4/2011 02:49:01 | 25.625 |
| 6/9/2010 12:48:00  | 24.5 | 2/4/2011 03:25:01 | 25.625 |
| 6/9/2010 13:23:00  | 24.5 | 2/4/2011 04:01:01 | 25.625 |
| 6/9/2010 13:58:00  | 24.5 | 2/4/2011 04:37:01 | 25.625 |
| 6/9/2010 14:33:00  | 24.5 | 2/4/2011 05:13:01 | 25.625 |
| 6/9/2010 15:08:00  | 24.5 | 2/4/2011 05:49:01 | 25.625 |
| 6/9/2010 15:43:00  | 24.5 | 2/4/2011 06:25:01 | 25.625 |
| 6/9/2010 16:18:00  | 24.5 | 2/4/2011 07:01:01 | 25.625 |
| 6/9/2010 16:53:00  | 24.5 | 2/4/2011 07:37:01 | 25.625 |
| 6/9/2010 17:28:00  | 24.5 | 2/4/2011 08:13:01 | 25.625 |
| 6/9/2010 18:03:00  | 24.5 | 2/4/2011 08:49:01 | 25.126 |
| 6/9/2010 18:38:00  | 24.5 | 2/4/2011 09:25:01 | 25.126 |
| 6/9/2010 19:13:00  | 24.5 | 2/4/2011 10:01:01 | 25.126 |
| 6/9/2010 19:48:00  | 24.5 | 2/4/2011 10:37:01 | 25.126 |
| 6/9/2010 20:23:00  | 24.5 | 2/4/2011 11:13:01 | 25.126 |
| 6/9/2010 20:58:00  | 24.5 | 2/4/2011 11:49:01 | 25.126 |
| 6/9/2010 21:33:00  | 24.5 | 2/4/2011 12:25:01 | 25.126 |
| 6/9/2010 22:08:00  | 24.5 | 2/4/2011 13:01:01 | 25.126 |
| 6/9/2010 22:43:00  | 24.5 | 2/4/2011 13:37:01 | 25.126 |
| 6/9/2010 23:18:00  | 24.5 | 2/4/2011 14:13:01 | 25.625 |
| 6/9/2010 23:53:00  | 24.5 | 2/4/2011 14:49:01 | 25.625 |
| 6/10/2010 00:28:00 | 24.5 | 2/4/2011 15:25:01 | 25.625 |
| 6/10/2010 01:03:00 | 24.5 | 2/4/2011 16:01:01 | 25.625 |
| 6/10/2010 01:38:00 | 24.5 | 2/4/2011 16:37:01 | 25.625 |
| 6/10/2010 02:13:00 | 24.5 | 2/4/2011 17:13:01 | 25.625 |
| 6/10/2010 02:48:00 | 24.5 | 2/4/2011 17:49:01 | 25.625 |
| 6/10/2010 03:23:00 | 24.5 | 2/4/2011 18:25:01 | 25.625 |
| 6/10/2010 03:58:00 | 24.5 | 2/4/2011 19:01:01 | 25.126 |
| 6/10/2010 04:33:00 | 24.5 | 2/4/2011 19:37:01 | 25.126 |
| 6/10/2010 05:08:00 | 24.5 | 2/4/2011 20:13:01 | 25.126 |
| 6/10/2010 05:43:00 | 24.5 | 2/4/2011 20:49:01 | 25.126 |
| 6/10/2010 06:18:00 | 24.5 | 2/4/2011 21:25:01 | 25.126 |
| 6/10/2010 06:53:00 | 24.5 | 2/4/2011 22:01:01 | 25.126 |
| 6/10/2010 07:28:00 | 24.5 | 2/4/2011 22:37:01 | 25.126 |
| 6/10/2010 08:03:00 | 24.5 | 2/4/2011 23:13:01 | 25.126 |
| 6/10/2010 08:38:00 | 24.5 | 2/4/2011 23:49:01 | 25.126 |
| 6/10/2010 09:13:00 | 24.5 | 2/5/2011 00:25:01 | 25.126 |
| 6/10/2010 09:48:00 | 24.5 | 2/5/2011 01:01:01 | 25.126 |
| 6/10/2010 10:23:00 | 24.5 | 2/5/2011 01:37:01 | 25.126 |

|                    |      |                   |        |
|--------------------|------|-------------------|--------|
| 6/10/2010 10:58:00 | 24.5 | 2/5/2011 02:13:01 | 25.126 |
| 6/10/2010 11:33:00 | 24.5 | 2/5/2011 02:49:01 | 25.126 |
| 6/10/2010 12:08:00 | 24.5 | 2/5/2011 03:25:01 | 25.126 |
| 6/10/2010 12:43:00 | 24.5 | 2/5/2011 04:01:01 | 25.126 |
| 6/10/2010 13:18:00 | 24.5 | 2/5/2011 04:37:01 | 25.126 |
| 6/10/2010 13:53:00 | 24.5 | 2/5/2011 05:13:01 | 25.126 |
| 6/10/2010 14:28:00 | 24.5 | 2/5/2011 05:49:01 | 25.126 |
| 6/10/2010 15:03:00 | 24.5 | 2/5/2011 06:25:01 | 25.126 |
| 6/10/2010 15:38:00 | 24.5 | 2/5/2011 07:01:01 | 25.126 |
| 6/10/2010 16:13:00 | 24.5 | 2/5/2011 07:37:01 | 25.126 |
| 6/10/2010 16:48:00 | 24.5 | 2/5/2011 08:13:01 | 25.625 |
| 6/10/2010 17:23:00 | 24.5 | 2/5/2011 08:49:01 | 25.625 |
| 6/10/2010 17:58:00 | 24.5 | 2/5/2011 09:25:01 | 25.625 |
| 6/10/2010 18:33:00 | 24.5 | 2/5/2011 10:01:01 | 25.625 |
| 6/10/2010 19:08:00 | 24.5 | 2/5/2011 10:37:01 | 25.126 |
| 6/10/2010 19:43:00 | 24.5 | 2/5/2011 11:13:01 | 25.126 |
| 6/10/2010 20:18:00 | 24.5 | 2/5/2011 11:49:01 | 25.126 |
| 6/10/2010 20:53:00 | 24.5 | 2/5/2011 12:25:01 | 25.126 |
| 6/10/2010 21:28:00 | 24.5 | 2/5/2011 13:01:01 | 25.126 |
| 6/10/2010 22:03:00 | 24.5 | 2/5/2011 13:37:01 | 25.126 |
| 6/10/2010 22:38:00 | 24.5 | 2/5/2011 14:13:01 | 25.126 |
| 6/10/2010 23:13:00 | 24.5 | 2/5/2011 14:49:01 | 25.126 |
| 6/10/2010 23:48:00 | 24.5 | 2/5/2011 15:25:01 | 25.126 |
| 6/11/2010 00:23:00 | 24.5 | 2/5/2011 16:01:01 | 25.126 |
| 6/11/2010 00:58:00 | 24.5 | 2/5/2011 16:37:01 | 25.126 |
| 6/11/2010 01:33:00 | 24.5 | 2/5/2011 17:13:01 | 25.126 |
| 6/11/2010 02:08:00 | 24.5 | 2/5/2011 17:49:01 | 25.126 |
| 6/11/2010 02:43:00 | 24.5 | 2/5/2011 18:25:01 | 25.126 |
| 6/11/2010 03:18:00 | 24.5 | 2/5/2011 19:01:01 | 25.126 |
| 6/11/2010 03:53:00 | 24.5 | 2/5/2011 19:37:01 | 25.126 |
| 6/11/2010 04:28:00 | 24.5 | 2/5/2011 20:13:01 | 25.126 |
| 6/11/2010 05:03:00 | 24.5 | 2/5/2011 20:49:01 | 25.126 |
| 6/11/2010 05:38:00 | 24.5 | 2/5/2011 21:25:01 | 25.126 |
| 6/11/2010 06:13:00 | 24.5 | 2/5/2011 22:01:01 | 25.625 |
| 6/11/2010 06:48:00 | 24.5 | 2/5/2011 22:37:01 | 25.625 |
| 6/11/2010 07:23:00 | 24.5 | 2/5/2011 23:13:01 | 25.625 |
| 6/11/2010 07:58:00 | 24.5 | 2/5/2011 23:49:01 | 25.625 |
| 6/11/2010 08:33:00 | 24.5 | 2/6/2011 00:25:01 | 25.625 |
| 6/11/2010 09:08:00 | 24.5 | 2/6/2011 01:01:01 | 25.625 |
| 6/11/2010 09:43:00 | 24.5 | 2/6/2011 01:37:01 | 25.625 |
| 6/11/2010 10:18:00 | 24.5 | 2/6/2011 02:13:01 | 25.625 |
| 6/11/2010 10:53:00 | 24.5 | 2/6/2011 02:49:01 | 25.625 |
| 6/11/2010 11:28:00 | 24.5 | 2/6/2011 03:25:01 | 25.625 |
| 6/11/2010 12:03:00 | 24.5 | 2/6/2011 04:01:01 | 25.625 |
| 6/11/2010 12:38:00 | 24.5 | 2/6/2011 04:37:01 | 25.625 |
| 6/11/2010 13:13:00 | 24.5 | 2/6/2011 05:13:01 | 25.625 |
| 6/11/2010 13:48:00 | 24.5 | 2/6/2011 05:49:01 | 25.625 |
| 6/11/2010 14:23:00 | 24.5 | 2/6/2011 06:25:01 | 25.625 |
| 6/11/2010 14:58:00 | 24.5 | 2/6/2011 07:01:01 | 25.625 |
| 6/11/2010 15:33:00 | 24.5 | 2/6/2011 07:37:01 | 25.126 |

|                    |      |                   |        |
|--------------------|------|-------------------|--------|
| 6/11/2010 16:08:00 | 24.5 | 2/6/2011 08:13:01 | 25.126 |
| 6/11/2010 16:43:00 | 24.5 | 2/6/2011 08:49:01 | 25.126 |
| 6/11/2010 17:18:00 | 24.5 | 2/6/2011 09:25:01 | 25.126 |
| 6/11/2010 17:53:00 | 24.5 | 2/6/2011 10:01:01 | 25.126 |
| 6/11/2010 18:28:00 | 24.5 | 2/6/2011 10:37:01 | 25.126 |
| 6/11/2010 19:03:00 | 24.5 | 2/6/2011 11:13:01 | 25.625 |
| 6/11/2010 19:38:00 | 24.5 | 2/6/2011 11:49:01 | 25.625 |
| 6/11/2010 20:13:00 | 24.5 | 2/6/2011 12:25:01 | 25.625 |
| 6/11/2010 20:48:00 | 24.5 | 2/6/2011 13:01:01 | 25.625 |
| 6/11/2010 21:23:00 | 24.5 | 2/6/2011 13:37:01 | 25.625 |
| 6/11/2010 21:58:00 | 24.5 | 2/6/2011 14:13:01 | 25.625 |
| 6/11/2010 22:33:00 | 24.5 | 2/6/2011 14:49:01 | 25.625 |
| 6/11/2010 23:08:00 | 24.5 | 2/6/2011 15:25:01 | 25.625 |
| 6/11/2010 23:43:00 | 24.5 | 2/6/2011 16:01:01 | 25.625 |
| 6/12/2010 00:18:00 | 24.5 | 2/6/2011 16:37:01 | 25.625 |
| 6/12/2010 00:53:00 | 24.5 | 2/6/2011 17:13:01 | 25.625 |
| 6/12/2010 01:28:00 | 24.5 | 2/6/2011 17:49:01 | 25.625 |
| 6/12/2010 02:03:00 | 24.5 | 2/6/2011 18:25:01 | 25.625 |
| 6/12/2010 02:38:00 | 24.5 | 2/6/2011 19:01:01 | 25.625 |
| 6/12/2010 03:13:00 | 24.5 | 2/6/2011 19:37:01 | 25.625 |
| 6/12/2010 03:48:00 | 24.5 | 2/6/2011 20:13:01 | 25.625 |
| 6/12/2010 04:23:00 | 24.5 | 2/6/2011 20:49:01 | 25.625 |
| 6/12/2010 04:58:00 | 24.5 | 2/6/2011 21:25:01 | 25.625 |
| 6/12/2010 05:33:00 | 24.5 | 2/6/2011 22:01:01 | 25.625 |
| 6/12/2010 06:08:00 | 24.5 | 2/6/2011 22:37:01 | 25.625 |
| 6/12/2010 06:43:00 | 24.5 | 2/6/2011 23:13:01 | 25.625 |
| 6/12/2010 07:18:00 | 24.5 | 2/6/2011 23:49:01 | 25.625 |
| 6/12/2010 07:53:00 | 24.0 | 2/7/2011 00:25:01 | 25.625 |
| 6/12/2010 08:28:00 | 24.0 | 2/7/2011 01:01:01 | 25.625 |
| 6/12/2010 09:03:00 | 24.0 | 2/7/2011 01:37:01 | 25.625 |
| 6/12/2010 09:38:00 | 24.0 | 2/7/2011 02:13:01 | 25.625 |
| 6/12/2010 10:13:00 | 24.0 | 2/7/2011 02:49:01 | 25.625 |
| 6/12/2010 10:48:00 | 24.0 | 2/7/2011 03:25:01 | 25.625 |
| 6/12/2010 11:23:00 | 24.0 | 2/7/2011 04:01:01 | 25.625 |
| 6/12/2010 11:58:00 | 24.0 | 2/7/2011 04:37:01 | 25.625 |
| 6/12/2010 12:33:00 | 24.0 | 2/7/2011 05:13:01 | 25.625 |
| 6/12/2010 13:08:00 | 24.0 | 2/7/2011 05:49:01 | 25.625 |
| 6/12/2010 13:43:00 | 24.0 | 2/7/2011 06:25:01 | 25.625 |
| 6/12/2010 14:18:00 | 24.0 | 2/7/2011 07:01:01 | 25.625 |
| 6/12/2010 14:53:00 | 24.0 | 2/7/2011 07:37:01 | 25.625 |
| 6/12/2010 15:28:00 | 24.0 | 2/7/2011 08:13:01 | 25.625 |
| 6/12/2010 16:03:00 | 24.0 | 2/7/2011 08:49:01 | 25.625 |
| 6/12/2010 16:38:00 | 24.5 | 2/7/2011 09:25:01 | 25.625 |
| 6/12/2010 17:13:00 | 24.5 | 2/7/2011 10:01:01 | 25.625 |
| 6/12/2010 17:48:00 | 24.5 | 2/7/2011 10:37:01 | 25.625 |
| 6/12/2010 18:23:00 | 24.5 | 2/7/2011 11:13:01 | 25.625 |
| 6/12/2010 18:58:00 | 24.5 | 2/7/2011 11:49:01 | 25.625 |
| 6/12/2010 19:33:00 | 24.5 | 2/7/2011 12:25:01 | 25.625 |
| 6/12/2010 20:08:00 | 24.5 | 2/7/2011 13:01:01 | 25.625 |
| 6/12/2010 20:43:00 | 24.5 | 2/7/2011 13:37:01 | 25.625 |

|                    |      |                   |        |
|--------------------|------|-------------------|--------|
| 6/12/2010 21:18:00 | 24.5 | 2/7/2011 14:13:01 | 25.625 |
| 6/12/2010 21:53:00 | 24.5 | 2/7/2011 14:49:01 | 25.625 |
| 6/12/2010 22:28:00 | 24.5 | 2/7/2011 15:25:01 | 25.625 |
| 6/12/2010 23:03:00 | 24.5 | 2/7/2011 16:01:01 | 25.625 |
| 6/12/2010 23:38:00 | 24.5 | 2/7/2011 16:37:01 | 25.625 |
| 6/13/2010 00:13:00 | 24.5 | 2/7/2011 17:13:01 | 25.625 |
| 6/13/2010 00:48:00 | 24.5 | 2/7/2011 17:49:01 | 25.625 |
| 6/13/2010 01:23:00 | 24.5 | 2/7/2011 18:25:01 | 25.625 |
| 6/13/2010 01:58:00 | 24.5 | 2/7/2011 19:01:01 | 25.625 |
| 6/13/2010 02:33:00 | 24.5 | 2/7/2011 19:37:01 | 25.625 |
| 6/13/2010 03:08:00 | 24.5 | 2/7/2011 20:13:01 | 25.625 |
| 6/13/2010 03:43:00 | 24.5 | 2/7/2011 20:49:01 | 25.625 |
| 6/13/2010 04:18:00 | 24.5 | 2/7/2011 21:25:01 | 25.625 |
| 6/13/2010 04:53:00 | 24.5 | 2/7/2011 22:01:01 | 25.625 |
| 6/13/2010 05:28:00 | 24.5 | 2/7/2011 22:37:01 | 25.625 |
| 6/13/2010 06:03:00 | 24.5 | 2/7/2011 23:13:01 | 25.625 |
| 6/13/2010 06:38:00 | 24.0 | 2/7/2011 23:49:01 | 25.625 |
| 6/13/2010 07:13:00 | 24.0 | 2/8/2011 00:25:01 | 25.625 |
| 6/13/2010 07:48:00 | 24.0 | 2/8/2011 01:01:01 | 25.625 |
| 6/13/2010 08:23:00 | 24.0 | 2/8/2011 01:37:01 | 25.625 |
| 6/13/2010 08:58:00 | 24.0 | 2/8/2011 02:13:01 | 25.625 |
| 6/13/2010 09:33:00 | 24.0 | 2/8/2011 02:49:01 | 25.625 |
| 6/13/2010 10:08:00 | 24.0 | 2/8/2011 03:25:01 | 25.625 |
| 6/13/2010 10:43:00 | 24.0 | 2/8/2011 04:01:01 | 25.625 |
| 6/13/2010 11:18:00 | 24.0 | 2/8/2011 04:37:01 | 25.625 |
| 6/13/2010 11:53:00 | 24.0 | 2/8/2011 05:13:01 | 25.625 |
| 6/13/2010 12:28:00 | 24.0 | 2/8/2011 05:49:01 | 25.625 |
| 6/13/2010 13:03:00 | 24.0 | 2/8/2011 06:25:01 | 25.625 |
| 6/13/2010 13:38:00 | 24.0 | 2/8/2011 07:01:01 | 25.625 |
| 6/13/2010 14:13:00 | 24.0 | 2/8/2011 07:37:01 | 25.625 |
| 6/13/2010 14:48:00 | 24.0 | 2/8/2011 08:13:01 | 25.625 |
| 6/13/2010 15:23:00 | 24.0 | 2/8/2011 08:49:01 | 25.625 |
| 6/13/2010 15:58:00 | 24.0 | 2/8/2011 09:25:01 | 25.625 |
| 6/13/2010 16:33:00 | 24.0 | 2/8/2011 10:01:01 | 25.625 |
| 6/13/2010 17:08:00 | 24.0 | 2/8/2011 10:37:01 | 25.625 |
| 6/13/2010 17:43:00 | 24.0 | 2/8/2011 11:13:01 | 25.625 |
| 6/13/2010 18:18:00 | 24.5 | 2/8/2011 11:49:01 | 25.625 |
| 6/13/2010 18:53:00 | 24.5 | 2/8/2011 12:25:01 | 25.625 |
| 6/13/2010 19:28:00 | 24.5 | 2/8/2011 13:01:01 | 25.625 |
| 6/13/2010 20:03:00 | 24.5 | 2/8/2011 13:37:01 | 25.625 |
| 6/13/2010 20:38:00 | 24.5 | 2/8/2011 14:13:01 | 25.625 |
| 6/13/2010 21:13:00 | 24.5 | 2/8/2011 14:49:01 | 25.625 |
| 6/13/2010 21:48:00 | 24.5 | 2/8/2011 15:25:01 | 25.625 |
| 6/13/2010 22:23:00 | 24.5 | 2/8/2011 16:01:01 | 25.625 |
| 6/13/2010 22:58:00 | 24.5 | 2/8/2011 16:37:01 | 25.625 |
| 6/13/2010 23:33:00 | 24.5 | 2/8/2011 17:13:01 | 25.625 |
| 6/14/2010 00:08:00 | 24.5 | 2/8/2011 17:49:01 | 25.625 |
| 6/14/2010 00:43:00 | 24.5 | 2/8/2011 18:25:01 | 25.625 |
| 6/14/2010 01:18:00 | 24.5 | 2/8/2011 19:01:01 | 25.625 |
| 6/14/2010 01:53:00 | 24.5 | 2/8/2011 19:37:01 | 25.625 |

|                    |      |                    |        |
|--------------------|------|--------------------|--------|
| 6/14/2010 02:28:00 | 24.5 | 2/8/2011 20:13:01  | 25.625 |
| 6/14/2010 03:03:00 | 24.5 | 2/8/2011 20:49:01  | 25.625 |
| 6/14/2010 03:38:00 | 24.0 | 2/8/2011 21:25:01  | 26.125 |
| 6/14/2010 04:13:00 | 24.0 | 2/8/2011 22:01:01  | 26.125 |
| 6/14/2010 04:48:00 | 24.0 | 2/8/2011 22:37:01  | 26.125 |
| 6/14/2010 05:23:00 | 24.0 | 2/8/2011 23:13:01  | 26.125 |
| 6/14/2010 05:58:00 | 24.0 | 2/8/2011 23:49:01  | 26.125 |
| 6/14/2010 06:33:00 | 24.0 | 2/9/2011 00:25:01  | 26.125 |
| 6/14/2010 07:08:00 | 24.0 | 2/9/2011 01:01:01  | 26.125 |
| 6/14/2010 07:43:00 | 24.0 | 2/9/2011 01:37:01  | 25.625 |
| 6/14/2010 08:18:00 | 24.0 | 2/9/2011 02:13:01  | 25.625 |
| 6/14/2010 08:53:00 | 24.0 | 2/9/2011 02:49:01  | 25.625 |
| 6/14/2010 09:28:00 | 24.0 | 2/9/2011 03:25:01  | 25.625 |
| 6/14/2010 10:03:00 | 24.0 | 2/9/2011 04:01:01  | 25.625 |
| 6/14/2010 10:38:00 | 24.0 | 2/9/2011 04:37:01  | 25.625 |
| 6/14/2010 11:13:00 | 24.0 | 2/9/2011 05:13:01  | 25.625 |
| 6/14/2010 11:48:00 | 24.0 | 2/9/2011 05:49:01  | 25.625 |
| 6/14/2010 12:23:00 | 24.0 | 2/9/2011 06:25:01  | 25.625 |
| 6/14/2010 12:58:00 | 24.0 | 2/9/2011 07:01:01  | 25.625 |
| 6/14/2010 13:33:00 | 24.0 | 2/9/2011 07:37:01  | 26.125 |
| 6/14/2010 14:08:00 | 24.0 | 2/9/2011 08:13:01  | 26.125 |
| 6/14/2010 14:43:00 | 24.0 | 2/9/2011 08:49:01  | 25.625 |
| 6/14/2010 15:18:00 | 24.0 | 2/9/2011 09:25:01  | 25.625 |
| 6/14/2010 15:53:00 | 24.0 | 2/9/2011 10:01:01  | 25.625 |
| 6/14/2010 16:28:00 | 24.0 | 2/9/2011 10:37:01  | 25.625 |
| 6/14/2010 17:03:00 | 24.0 | 2/9/2011 11:13:01  | 25.625 |
| 6/14/2010 17:38:00 | 24.0 | 2/9/2011 11:49:01  | 25.625 |
| 6/14/2010 18:13:00 | 24.0 | 2/9/2011 12:25:01  | 25.625 |
| 6/14/2010 18:48:00 | 24.0 | 2/9/2011 13:01:01  | 25.625 |
| 6/14/2010 19:23:00 | 24.0 | 2/9/2011 13:37:01  | 25.625 |
| 6/14/2010 19:58:00 | 24.0 | 2/9/2011 14:13:01  | 25.625 |
| 6/14/2010 20:33:00 | 24.0 | 2/9/2011 14:49:01  | 25.625 |
| 6/14/2010 21:08:00 | 24.0 | 2/9/2011 15:25:01  | 25.625 |
| 6/14/2010 21:43:00 | 24.0 | 2/9/2011 16:01:01  | 25.625 |
| 6/14/2010 22:18:00 | 24.0 | 2/9/2011 16:37:01  | 25.625 |
| 6/14/2010 22:53:00 | 24.0 | 2/9/2011 17:13:01  | 25.625 |
| 6/14/2010 23:28:00 | 24.0 | 2/9/2011 17:49:01  | 25.625 |
| 6/15/2010 00:03:00 | 24.0 | 2/9/2011 18:25:01  | 25.625 |
| 6/15/2010 00:38:00 | 24.0 | 2/9/2011 19:01:01  | 26.125 |
| 6/15/2010 01:13:00 | 24.0 | 2/9/2011 19:37:01  | 26.125 |
| 6/15/2010 01:48:00 | 24.0 | 2/9/2011 20:13:01  | 26.125 |
| 6/15/2010 02:23:00 | 24.0 | 2/9/2011 20:49:01  | 26.125 |
| 6/15/2010 02:58:00 | 24.0 | 2/9/2011 21:25:01  | 26.125 |
| 6/15/2010 03:33:00 | 24.0 | 2/9/2011 22:01:01  | 26.125 |
| 6/15/2010 04:08:00 | 24.0 | 2/9/2011 22:37:01  | 25.625 |
| 6/15/2010 04:43:00 | 24.0 | 2/9/2011 23:13:01  | 25.625 |
| 6/15/2010 05:18:00 | 24.0 | 2/9/2011 23:49:01  | 25.625 |
| 6/15/2010 05:53:00 | 24.0 | 2/10/2011 00:25:01 | 25.625 |
| 6/15/2010 06:28:00 | 24.0 | 2/10/2011 01:01:01 | 25.625 |
| 6/15/2010 07:03:00 | 24.0 | 2/10/2011 01:37:01 | 25.625 |



|                    |      |                    |        |
|--------------------|------|--------------------|--------|
| 6/15/2010 07:38:00 | 24.0 | 2/10/2011 02:13:01 | 25.625 |
| 6/15/2010 08:13:00 | 24.0 | 2/10/2011 02:49:01 | 25.625 |
| 6/15/2010 08:48:00 | 24.0 | 2/10/2011 03:25:01 | 26.125 |
| 6/15/2010 09:23:00 | 24.0 | 2/10/2011 04:01:01 | 26.125 |
| 6/15/2010 09:58:00 | 24.0 | 2/10/2011 04:37:01 | 26.125 |
| 6/15/2010 10:33:00 | 24.0 | 2/10/2011 05:13:01 | 25.625 |
| 6/15/2010 11:08:00 | 24.0 | 2/10/2011 05:49:01 | 25.625 |
| 6/15/2010 11:43:00 | 24.0 | 2/10/2011 06:25:01 | 25.625 |
| 6/15/2010 12:18:00 | 24.0 | 2/10/2011 07:01:01 | 25.625 |
| 6/15/2010 12:53:00 | 24.0 | 2/10/2011 07:37:01 | 25.625 |
| 6/15/2010 13:28:00 | 24.0 | 2/10/2011 08:13:01 | 25.625 |
| 6/15/2010 14:03:00 | 24.0 | 2/10/2011 08:49:01 | 25.625 |
| 6/15/2010 14:38:00 | 24.0 | 2/10/2011 09:25:01 | 25.625 |
| 6/15/2010 15:13:00 | 24.0 | 2/10/2011 10:01:01 | 25.625 |
| 6/15/2010 15:48:00 | 24.0 | 2/10/2011 10:37:01 | 25.625 |
| 6/15/2010 16:23:00 | 24.0 | 2/10/2011 11:13:01 | 25.625 |
| 6/15/2010 16:58:00 | 24.0 | 2/10/2011 11:49:01 | 26.125 |
| 6/15/2010 17:33:00 | 24.0 | 2/10/2011 12:25:01 | 26.125 |
| 6/15/2010 18:08:00 | 24.0 | 2/10/2011 13:01:01 | 26.125 |
| 6/15/2010 18:43:00 | 24.5 | 2/10/2011 13:37:01 | 26.125 |
| 6/15/2010 19:18:00 | 24.5 | 2/10/2011 14:13:01 | 26.125 |
| 6/15/2010 19:53:00 | 24.5 | 2/10/2011 14:49:01 | 26.125 |
| 6/15/2010 20:28:00 | 24.5 | 2/10/2011 15:25:01 | 26.125 |
| 6/15/2010 21:03:00 | 24.5 | 2/10/2011 16:01:01 | 26.125 |
| 6/15/2010 21:38:00 | 24.5 | 2/10/2011 16:37:01 | 26.125 |
| 6/15/2010 22:13:00 | 24.5 | 2/10/2011 17:13:01 | 26.125 |
| 6/15/2010 22:48:00 | 24.5 | 2/10/2011 17:49:01 | 26.125 |
| 6/15/2010 23:23:00 | 24.5 | 2/10/2011 18:25:01 | 25.625 |
| 6/15/2010 23:58:00 | 24.5 | 2/10/2011 19:01:01 | 25.625 |
| 6/16/2010 00:33:00 | 24.5 | 2/10/2011 19:37:01 | 25.625 |
| 6/16/2010 01:08:00 | 24.5 | 2/10/2011 20:13:01 | 25.625 |
| 6/16/2010 01:43:00 | 24.5 | 2/10/2011 20:49:01 | 25.625 |
| 6/16/2010 02:18:00 | 24.5 | 2/10/2011 21:25:01 | 25.625 |
| 6/16/2010 02:53:00 | 24.5 | 2/10/2011 22:01:01 | 25.625 |
| 6/16/2010 03:28:00 | 24.5 | 2/10/2011 22:37:01 | 25.625 |
| 6/16/2010 04:03:00 | 24.5 | 2/10/2011 23:13:01 | 25.625 |
| 6/16/2010 04:38:00 | 24.5 | 2/10/2011 23:49:01 | 25.625 |
| 6/16/2010 05:13:00 | 24.5 | 2/11/2011 00:25:01 | 26.125 |
| 6/16/2010 05:48:00 | 24.5 | 2/11/2011 01:01:01 | 26.125 |
| 6/16/2010 06:23:00 | 24.5 | 2/11/2011 01:37:01 | 26.125 |
| 6/16/2010 06:58:00 | 24.5 | 2/11/2011 02:13:01 | 26.125 |
| 6/16/2010 07:33:00 | 24.5 | 2/11/2011 02:49:01 | 26.125 |
| 6/16/2010 08:08:00 | 24.5 | 2/11/2011 03:25:01 | 26.125 |
| 6/16/2010 08:43:00 | 24.0 | 2/11/2011 04:01:01 | 26.125 |
| 6/16/2010 09:18:00 | 24.0 | 2/11/2011 04:37:01 | 26.125 |
| 6/16/2010 09:53:00 | 24.0 | 2/11/2011 05:13:01 | 26.125 |
| 6/16/2010 10:28:00 | 24.0 | 2/11/2011 05:49:01 | 26.125 |
| 6/16/2010 11:03:00 | 24.0 | 2/11/2011 06:25:01 | 26.125 |
| 6/16/2010 11:38:00 | 24.0 | 2/11/2011 07:01:01 | 26.125 |
| 6/16/2010 12:13:00 | 24.0 | 2/11/2011 07:37:01 | 26.125 |

|                    |      |                    |        |
|--------------------|------|--------------------|--------|
| 6/16/2010 12:48:00 | 24.0 | 2/11/2011 08:13:01 | 25.625 |
| 6/16/2010 13:23:00 | 24.0 | 2/11/2011 08:49:01 | 25.625 |
| 6/16/2010 13:58:00 | 24.0 | 2/11/2011 09:25:01 | 26.125 |
| 6/16/2010 14:33:00 | 24.0 | 2/11/2011 10:01:01 | 26.125 |
| 6/16/2010 15:08:00 | 24.0 | 2/11/2011 10:37:01 | 26.125 |
| 6/16/2010 15:43:00 | 24.0 | 2/11/2011 11:13:01 | 26.125 |
| 6/16/2010 16:18:00 | 24.5 | 2/11/2011 11:49:01 | 26.125 |
| 6/16/2010 16:53:00 | 24.5 | 2/11/2011 12:25:01 | 26.125 |
| 6/16/2010 17:28:00 | 24.5 | 2/11/2011 13:01:01 | 25.625 |
| 6/16/2010 18:03:00 | 24.5 | 2/11/2011 13:37:01 | 25.625 |
| 6/16/2010 18:38:00 | 24.5 | 2/11/2011 14:13:01 | 26.125 |
| 6/16/2010 19:13:00 | 24.5 | 2/11/2011 14:49:01 | 26.125 |
| 6/16/2010 19:48:00 | 24.5 | 2/11/2011 15:25:01 | 25.625 |
| 6/16/2010 20:23:00 | 24.5 | 2/11/2011 16:01:01 | 25.625 |
| 6/16/2010 20:58:00 | 24.5 | 2/11/2011 16:37:01 | 26.125 |
| 6/16/2010 21:33:00 | 24.5 | 2/11/2011 17:13:01 | 25.625 |
| 6/16/2010 22:08:00 | 24.5 | 2/11/2011 17:49:01 | 26.125 |
| 6/16/2010 22:43:00 | 24.5 | 2/11/2011 18:25:01 | 25.625 |
| 6/16/2010 23:18:00 | 24.5 | 2/11/2011 19:01:01 | 26.125 |
| 6/16/2010 23:53:00 | 24.5 | 2/11/2011 19:37:01 | 26.125 |
| 6/17/2010 00:28:00 | 24.5 | 2/11/2011 20:13:01 | 26.125 |
| 6/17/2010 01:03:00 | 24.5 | 2/11/2011 20:49:01 | 26.125 |
| 6/17/2010 01:38:00 | 24.5 | 2/11/2011 21:25:01 | 26.125 |
| 6/17/2010 02:13:00 | 24.5 | 2/11/2011 22:01:01 | 26.125 |
| 6/17/2010 02:48:00 | 24.5 | 2/11/2011 22:37:01 | 26.125 |
| 6/17/2010 03:23:00 | 24.5 | 2/11/2011 23:13:01 | 26.125 |
| 6/17/2010 03:58:00 | 24.5 | 2/11/2011 23:49:01 | 26.125 |
| 6/17/2010 04:33:00 | 24.5 | 2/12/2011 00:25:01 | 26.125 |
| 6/17/2010 05:08:00 | 24.5 | 2/12/2011 01:01:01 | 26.125 |
| 6/17/2010 05:43:00 | 24.5 | 2/12/2011 01:37:01 | 26.125 |
| 6/17/2010 06:18:00 | 24.5 | 2/12/2011 02:13:01 | 26.125 |
| 6/17/2010 06:53:00 | 24.5 | 2/12/2011 02:49:01 | 26.125 |
| 6/17/2010 07:28:00 | 24.5 | 2/12/2011 03:25:01 | 26.125 |
| 6/17/2010 08:03:00 | 24.0 | 2/12/2011 04:01:01 | 26.125 |
| 6/17/2010 08:38:00 | 24.0 | 2/12/2011 04:37:01 | 26.125 |
| 6/17/2010 09:13:00 | 24.0 | 2/12/2011 05:13:01 | 26.125 |
| 6/17/2010 09:48:00 | 24.0 | 2/12/2011 05:49:01 | 26.125 |
| 6/17/2010 10:23:00 | 24.0 | 2/12/2011 06:25:01 | 26.125 |
| 6/17/2010 10:58:00 | 24.0 | 2/12/2011 07:01:01 | 26.125 |
| 6/17/2010 11:33:00 | 24.0 | 2/12/2011 07:37:01 | 26.125 |
| 6/17/2010 12:08:00 | 24.0 | 2/12/2011 08:13:01 | 26.125 |
| 6/17/2010 12:43:00 | 24.0 | 2/12/2011 08:49:01 | 26.125 |
| 6/17/2010 13:18:00 | 24.0 | 2/12/2011 09:25:01 | 26.125 |
| 6/17/2010 13:53:00 | 24.0 | 2/12/2011 10:01:01 | 26.125 |
| 6/17/2010 14:28:00 | 24.0 | 2/12/2011 10:37:01 | 25.625 |
| 6/17/2010 15:03:00 | 24.0 | 2/12/2011 11:13:01 | 26.125 |
| 6/17/2010 15:38:00 | 24.0 | 2/12/2011 11:49:01 | 26.125 |
| 6/17/2010 16:13:00 | 24.0 | 2/12/2011 12:25:01 | 26.125 |
| 6/17/2010 16:48:00 | 24.0 | 2/12/2011 13:01:01 | 26.125 |
| 6/17/2010 17:23:00 | 24.5 | 2/12/2011 13:37:01 | 26.125 |

|                    |      |                    |        |
|--------------------|------|--------------------|--------|
| 6/17/2010 17:58:00 | 24.5 | 2/12/2011 14:13:01 | 25.625 |
| 6/17/2010 18:33:00 | 24.5 | 2/12/2011 14:49:01 | 26.125 |
| 6/17/2010 19:08:00 | 24.5 | 2/12/2011 15:25:01 | 26.125 |
| 6/17/2010 19:43:00 | 24.5 | 2/12/2011 16:01:01 | 26.125 |
| 6/17/2010 20:18:00 | 24.5 | 2/12/2011 16:37:01 | 26.125 |
| 6/17/2010 20:53:00 | 24.5 | 2/12/2011 17:13:01 | 26.125 |
| 6/17/2010 21:28:00 | 24.5 | 2/12/2011 17:49:01 | 26.125 |
| 6/17/2010 22:03:00 | 24.5 | 2/12/2011 18:25:01 | 26.125 |
| 6/17/2010 22:38:00 | 24.5 | 2/12/2011 19:01:01 | 26.125 |
| 6/17/2010 23:13:00 | 24.5 | 2/12/2011 19:37:01 | 26.125 |
| 6/17/2010 23:48:00 | 24.5 | 2/12/2011 20:13:01 | 26.125 |
| 6/18/2010 00:23:00 | 24.5 | 2/12/2011 20:49:01 | 26.125 |
| 6/18/2010 00:58:00 | 24.5 | 2/12/2011 21:25:01 | 26.125 |
| 6/18/2010 01:33:00 | 24.5 | 2/12/2011 22:01:01 | 26.125 |
| 6/18/2010 02:08:00 | 24.5 | 2/12/2011 22:37:01 | 26.125 |
| 6/18/2010 02:43:00 | 24.5 | 2/12/2011 23:13:01 | 26.125 |
| 6/18/2010 03:18:00 | 24.5 | 2/12/2011 23:49:01 | 26.125 |
| 6/18/2010 03:53:00 | 24.5 | 2/13/2011 00:25:01 | 26.125 |
| 6/18/2010 04:28:00 | 24.5 | 2/13/2011 01:01:01 | 26.125 |
| 6/18/2010 05:03:00 | 24.5 | 2/13/2011 01:37:01 | 26.125 |
| 6/18/2010 05:38:00 | 24.5 | 2/13/2011 02:13:01 | 26.125 |
| 6/18/2010 06:13:00 | 24.5 | 2/13/2011 02:49:01 | 26.125 |
| 6/18/2010 06:48:00 | 24.5 | 2/13/2011 03:25:01 | 26.125 |
| 6/18/2010 07:23:00 | 24.5 | 2/13/2011 04:01:01 | 26.125 |
| 6/18/2010 07:58:00 | 24.5 | 2/13/2011 04:37:01 | 26.125 |
| 6/18/2010 08:33:00 | 24.5 | 2/13/2011 05:13:01 | 25.625 |
| 6/18/2010 09:08:00 | 24.0 | 2/13/2011 05:49:01 | 25.625 |
| 6/18/2010 09:43:00 | 24.0 | 2/13/2011 06:25:01 | 26.125 |
| 6/18/2010 10:18:00 | 24.0 | 2/13/2011 07:01:01 | 25.625 |
| 6/18/2010 10:53:00 | 24.0 | 2/13/2011 07:37:01 | 25.625 |
| 6/18/2010 11:28:00 | 24.0 | 2/13/2011 08:13:01 | 25.625 |
| 6/18/2010 12:03:00 | 24.0 | 2/13/2011 08:49:01 | 25.625 |
| 6/18/2010 12:38:00 | 24.0 | 2/13/2011 09:25:01 | 25.625 |
| 6/18/2010 13:13:00 | 24.0 | 2/13/2011 10:01:01 | 25.625 |
| 6/18/2010 13:48:00 | 24.0 | 2/13/2011 10:37:01 | 25.625 |
| 6/18/2010 14:23:00 | 24.0 | 2/13/2011 11:13:01 | 25.625 |
| 6/18/2010 14:58:00 | 24.0 | 2/13/2011 11:49:01 | 25.625 |
| 6/18/2010 15:33:00 | 24.0 | 2/13/2011 12:25:01 | 25.625 |
| 6/18/2010 16:08:00 | 24.5 | 2/13/2011 13:01:01 | 25.625 |
| 6/18/2010 16:43:00 | 24.5 | 2/13/2011 13:37:01 | 25.625 |
| 6/18/2010 17:18:00 | 24.5 | 2/13/2011 14:13:01 | 25.625 |
| 6/18/2010 17:53:00 | 24.5 | 2/13/2011 14:49:01 | 25.625 |
| 6/18/2010 18:28:00 | 24.5 | 2/13/2011 15:25:01 | 25.625 |
| 6/18/2010 19:03:00 | 24.5 | 2/13/2011 16:01:01 | 25.625 |
| 6/18/2010 19:38:00 | 24.5 | 2/13/2011 16:37:01 | 25.625 |
| 6/18/2010 20:13:00 | 24.5 | 2/13/2011 17:13:01 | 25.625 |
| 6/18/2010 20:48:00 | 24.5 | 2/13/2011 17:49:01 | 25.625 |
| 6/18/2010 21:23:00 | 24.5 | 2/13/2011 18:25:01 | 25.625 |
| 6/18/2010 21:58:00 | 24.5 | 2/13/2011 19:01:01 | 25.625 |
| 6/18/2010 22:33:00 | 24.5 | 2/13/2011 19:37:01 | 25.625 |

|                    |      |                    |        |
|--------------------|------|--------------------|--------|
| 6/18/2010 23:08:00 | 24.5 | 2/13/2011 20:13:01 | 26.125 |
| 6/18/2010 23:43:00 | 24.5 | 2/13/2011 20:49:01 | 26.125 |
| 6/19/2010 00:18:00 | 24.5 | 2/13/2011 21:25:01 | 26.125 |
| 6/19/2010 00:53:00 | 24.5 | 2/13/2011 22:01:01 | 26.125 |
| 6/19/2010 01:28:00 | 24.5 | 2/13/2011 22:37:01 | 26.125 |
| 6/19/2010 02:03:00 | 24.5 | 2/13/2011 23:13:01 | 26.125 |
| 6/19/2010 02:38:00 | 24.5 | 2/13/2011 23:49:01 | 26.125 |
| 6/19/2010 03:13:00 | 24.5 | 2/14/2011 00:25:01 | 26.125 |
| 6/19/2010 03:48:00 | 24.5 | 2/14/2011 01:01:01 | 26.125 |
| 6/19/2010 04:23:00 | 24.5 | 2/14/2011 01:37:01 | 25.625 |
| 6/19/2010 04:58:00 | 24.5 | 2/14/2011 02:13:01 | 26.125 |
| 6/19/2010 05:33:00 | 24.0 | 2/14/2011 02:49:01 | 26.125 |
| 6/19/2010 06:08:00 | 24.0 | 2/14/2011 03:25:01 | 26.125 |
| 6/19/2010 06:43:00 | 24.0 | 2/14/2011 04:01:01 | 26.125 |
| 6/19/2010 07:18:00 | 24.0 | 2/14/2011 04:37:01 | 26.125 |
| 6/19/2010 07:53:00 | 24.0 | 2/14/2011 05:13:01 | 26.125 |
| 6/19/2010 08:28:00 | 24.0 | 2/14/2011 05:49:01 | 26.125 |
| 6/19/2010 09:03:00 | 24.0 | 2/14/2011 06:25:01 | 25.625 |
| 6/19/2010 09:38:00 | 24.0 | 2/14/2011 07:01:01 | 25.625 |
| 6/19/2010 10:13:00 | 24.0 | 2/14/2011 07:37:01 | 25.625 |
| 6/19/2010 10:48:00 | 24.0 | 2/14/2011 08:13:01 | 25.625 |
| 6/19/2010 11:23:00 | 24.0 | 2/14/2011 08:49:01 | 25.625 |
| 6/19/2010 11:58:00 | 24.0 | 2/14/2011 09:25:01 | 25.625 |
| 6/19/2010 12:33:00 | 24.0 | 2/14/2011 10:01:01 | 25.625 |
| 6/19/2010 13:08:00 | 24.0 | 2/14/2011 10:37:01 | 25.625 |
| 6/19/2010 13:43:00 | 24.0 | 2/14/2011 11:13:01 | 25.625 |
| 6/19/2010 14:18:00 | 24.0 | 2/14/2011 11:49:01 | 25.625 |
| 6/19/2010 14:53:00 | 24.0 | 2/14/2011 12:25:01 | 25.625 |
| 6/19/2010 15:28:00 | 24.0 | 2/14/2011 13:01:01 | 25.625 |
| 6/19/2010 16:03:00 | 24.0 | 2/14/2011 13:37:01 | 25.625 |
| 6/19/2010 16:38:00 | 24.0 | 2/14/2011 14:13:01 | 25.625 |
| 6/19/2010 17:13:00 | 24.5 | 2/14/2011 14:49:01 | 25.625 |
| 6/19/2010 17:48:00 | 24.5 | 2/14/2011 15:25:01 | 25.625 |
| 6/19/2010 18:23:00 | 24.5 | 2/14/2011 16:01:01 | 25.625 |
| 6/19/2010 18:58:00 | 24.5 | 2/14/2011 16:37:01 | 25.625 |
| 6/19/2010 19:33:00 | 24.5 | 2/14/2011 17:13:01 | 25.625 |
| 6/19/2010 20:08:00 | 24.5 | 2/14/2011 17:49:01 | 25.625 |
| 6/19/2010 20:43:00 | 24.5 | 2/14/2011 18:25:01 | 25.625 |
| 6/19/2010 21:18:00 | 24.5 | 2/14/2011 19:01:01 | 25.625 |
| 6/19/2010 21:53:00 | 24.5 | 2/14/2011 19:37:01 | 25.625 |
| 6/19/2010 22:28:00 | 24.5 | 2/14/2011 20:13:01 | 25.625 |
| 6/19/2010 23:03:00 | 24.5 | 2/14/2011 20:49:01 | 25.625 |
| 6/19/2010 23:38:00 | 24.5 | 2/14/2011 21:25:01 | 25.625 |
| 6/20/2010 00:13:00 | 24.5 | 2/14/2011 22:01:01 | 25.625 |
| 6/20/2010 00:48:00 | 24.5 | 2/14/2011 22:37:01 | 25.625 |
| 6/20/2010 01:23:00 | 24.5 | 2/14/2011 23:13:01 | 25.625 |
| 6/20/2010 01:58:00 | 24.5 | 2/14/2011 23:49:01 | 25.625 |
| 6/20/2010 02:33:00 | 24.5 | 2/15/2011 00:25:01 | 25.625 |
| 6/20/2010 03:08:00 | 24.5 | 2/15/2011 01:01:01 | 25.126 |
| 6/20/2010 03:43:00 | 24.5 | 2/15/2011 01:37:01 | 25.126 |

|                    |      |                    |        |
|--------------------|------|--------------------|--------|
| 6/20/2010 04:18:00 | 24.5 | 2/15/2011 02:13:01 | 25.126 |
| 6/20/2010 04:53:00 | 24.0 | 2/15/2011 02:49:01 | 25.126 |
| 6/20/2010 05:28:00 | 24.5 | 2/15/2011 03:25:01 | 25.126 |
| 6/20/2010 06:03:00 | 24.0 | 2/15/2011 04:01:01 | 25.126 |
| 6/20/2010 06:38:00 | 24.0 | 2/15/2011 04:37:01 | 25.126 |
| 6/20/2010 07:13:00 | 24.0 | 2/15/2011 05:13:01 | 25.126 |
| 6/20/2010 07:48:00 | 24.0 | 2/15/2011 05:49:01 | 25.126 |
| 6/20/2010 08:23:00 | 24.0 | 2/15/2011 06:25:01 | 25.126 |
| 6/20/2010 08:58:00 | 24.0 | 2/15/2011 07:01:01 | 25.126 |
| 6/20/2010 09:33:00 | 24.0 | 2/15/2011 07:37:01 | 25.126 |
| 6/20/2010 10:08:00 | 24.0 | 2/15/2011 08:13:01 | 25.126 |
| 6/20/2010 10:43:00 | 24.0 | 2/15/2011 08:49:01 | 25.625 |
| 6/20/2010 11:18:00 | 24.0 | 2/15/2011 09:25:01 | 25.625 |
| 6/20/2010 11:53:00 | 24.0 | 2/15/2011 10:01:01 | 25.625 |
| 6/20/2010 12:28:00 | 24.0 | 2/15/2011 10:37:01 | 25.625 |
| 6/20/2010 13:03:00 | 24.0 | 2/15/2011 11:13:01 | 25.625 |
| 6/20/2010 13:38:00 | 24.0 | 2/15/2011 11:49:01 | 25.625 |
| 6/20/2010 14:13:00 | 24.0 | 2/15/2011 12:25:01 | 25.126 |
| 6/20/2010 14:48:00 | 24.0 | 2/15/2011 13:01:01 | 25.126 |
| 6/20/2010 15:23:00 | 24.0 | 2/15/2011 13:37:01 | 25.126 |
| 6/20/2010 15:58:00 | 24.0 | 2/15/2011 14:13:01 | 25.126 |
| 6/20/2010 16:33:00 | 24.0 | 2/15/2011 14:49:01 | 25.126 |
| 6/20/2010 17:08:00 | 24.0 | 2/15/2011 15:25:01 | 25.126 |
| 6/20/2010 17:43:00 | 24.0 | 2/15/2011 16:01:01 | 25.126 |
| 6/20/2010 18:18:00 | 24.5 | 2/15/2011 16:37:01 | 25.126 |
| 6/20/2010 18:53:00 | 24.5 | 2/15/2011 17:13:01 | 25.126 |
| 6/20/2010 19:28:00 | 24.5 | 2/15/2011 17:49:01 | 25.126 |
| 6/20/2010 20:03:00 | 24.5 | 2/15/2011 18:25:01 | 25.126 |
| 6/20/2010 20:38:00 | 24.5 | 2/15/2011 19:01:01 | 25.126 |
| 6/20/2010 21:13:00 | 24.5 | 2/15/2011 19:37:01 | 25.126 |
| 6/20/2010 21:48:00 | 24.5 | 2/15/2011 20:13:01 | 25.126 |
| 6/20/2010 22:23:00 | 24.5 | 2/15/2011 20:49:01 | 25.126 |
| 6/20/2010 22:58:00 | 24.5 | 2/15/2011 21:25:01 | 25.126 |
| 6/20/2010 23:33:00 | 24.0 | 2/15/2011 22:01:01 | 25.126 |
| 6/21/2010 00:08:00 | 24.0 | 2/15/2011 22:37:01 | 25.126 |
| 6/21/2010 00:43:00 | 24.0 | 2/15/2011 23:13:01 | 25.126 |
| 6/21/2010 01:18:00 | 24.0 | 2/15/2011 23:49:01 | 25.126 |
| 6/21/2010 01:53:00 | 24.0 | 2/16/2011 00:25:01 | 25.126 |
| 6/21/2010 02:28:00 | 24.0 | 2/16/2011 01:01:01 | 25.126 |
| 6/21/2010 03:03:00 | 24.0 | 2/16/2011 01:37:01 | 25.126 |
| 6/21/2010 03:38:00 | 24.0 | 2/16/2011 02:13:01 | 25.126 |
| 6/21/2010 04:13:00 | 24.0 | 2/16/2011 02:49:01 | 25.126 |
| 6/21/2010 04:48:00 | 24.0 | 2/16/2011 03:25:01 | 25.126 |
| 6/21/2010 05:23:00 | 24.0 | 2/16/2011 04:01:01 | 25.126 |
| 6/21/2010 05:58:00 | 24.0 | 2/16/2011 04:37:01 | 25.126 |
| 6/21/2010 06:33:00 | 24.0 | 2/16/2011 05:13:01 | 25.126 |
| 6/21/2010 07:08:00 | 24.0 | 2/16/2011 05:49:01 | 25.126 |
| 6/21/2010 07:43:00 | 24.0 | 2/16/2011 06:25:01 | 25.126 |
| 6/21/2010 08:18:00 | 24.0 | 2/16/2011 07:01:01 | 25.126 |
| 6/21/2010 08:53:00 | 24.0 | 2/16/2011 07:37:01 | 25.126 |

|                    |      |                    |        |
|--------------------|------|--------------------|--------|
| 6/21/2010 09:28:00 | 24.0 | 2/16/2011 08:13:01 | 25.126 |
| 6/21/2010 10:03:00 | 24.0 | 2/16/2011 08:49:01 | 25.126 |
| 6/21/2010 10:38:00 | 24.0 | 2/16/2011 09:25:01 | 25.126 |
| 6/21/2010 11:13:00 | 24.0 | 2/16/2011 10:01:01 | 25.126 |
| 6/21/2010 11:48:00 | 24.0 | 2/16/2011 10:37:01 | 25.126 |
| 6/21/2010 12:23:00 | 24.0 | 2/16/2011 11:13:01 | 25.126 |
| 6/21/2010 12:58:00 | 24.0 | 2/16/2011 11:49:01 | 25.126 |
| 6/21/2010 13:33:00 | 24.0 | 2/16/2011 12:25:01 | 25.126 |
| 6/21/2010 14:08:00 | 24.0 | 2/16/2011 13:01:01 | 25.126 |
| 6/21/2010 14:43:00 | 24.0 | 2/16/2011 13:37:01 | 25.126 |
| 6/21/2010 15:18:00 | 24.0 | 2/16/2011 14:13:01 | 25.126 |
| 6/21/2010 15:53:00 | 24.0 | 2/16/2011 14:49:01 | 25.126 |
| 6/21/2010 16:28:00 | 24.0 | 2/16/2011 15:25:01 | 25.126 |
| 6/21/2010 17:03:00 | 24.0 | 2/16/2011 16:01:01 | 25.126 |
| 6/21/2010 17:38:00 | 24.0 | 2/16/2011 16:37:01 | 25.126 |
| 6/21/2010 18:13:00 | 24.0 | 2/16/2011 17:13:01 | 25.126 |
| 6/21/2010 18:48:00 | 24.0 | 2/16/2011 17:49:01 | 25.126 |
| 6/21/2010 19:23:00 | 24.0 | 2/16/2011 18:25:01 | 25.126 |
| 6/21/2010 19:58:00 | 24.0 | 2/16/2011 19:01:01 | 25.126 |
| 6/21/2010 20:33:00 | 24.0 | 2/16/2011 19:37:01 | 25.126 |
| 6/21/2010 21:08:00 | 24.5 | 2/16/2011 20:13:01 | 25.126 |
| 6/21/2010 21:43:00 | 24.0 | 2/16/2011 20:49:01 | 25.126 |
| 6/21/2010 22:18:00 | 24.0 | 2/16/2011 21:25:01 | 25.126 |
| 6/21/2010 22:53:00 | 24.0 | 2/16/2011 22:01:01 | 25.126 |
| 6/21/2010 23:28:00 | 24.0 | 2/16/2011 22:37:01 | 25.126 |
| 6/22/2010 00:03:00 | 24.0 | 2/16/2011 23:13:01 | 25.126 |
| 6/22/2010 00:38:00 | 24.0 | 2/16/2011 23:49:01 | 25.126 |
| 6/22/2010 01:13:00 | 24.0 | 2/17/2011 00:25:01 | 25.126 |
| 6/22/2010 01:48:00 | 24.0 | 2/17/2011 01:01:01 | 25.126 |
| 6/22/2010 02:23:00 | 24.0 | 2/17/2011 01:37:01 | 25.126 |
| 6/22/2010 02:58:00 | 24.0 | 2/17/2011 02:13:01 | 25.126 |
| 6/22/2010 03:33:00 | 24.0 | 2/17/2011 02:49:01 | 25.126 |
| 6/22/2010 04:08:00 | 24.0 | 2/17/2011 03:25:01 | 25.126 |
| 6/22/2010 04:43:00 | 24.0 | 2/17/2011 04:01:01 | 25.126 |
| 6/22/2010 05:18:00 | 24.0 | 2/17/2011 04:37:01 | 25.126 |
| 6/22/2010 05:53:00 | 24.0 | 2/17/2011 05:13:01 | 25.126 |
| 6/22/2010 06:28:00 | 24.0 | 2/17/2011 05:49:01 | 25.126 |
| 6/22/2010 07:03:00 | 24.0 | 2/17/2011 06:25:01 | 25.126 |
| 6/22/2010 07:38:00 | 24.0 | 2/17/2011 07:01:01 | 25.126 |
| 6/22/2010 08:13:00 | 24.0 | 2/17/2011 07:37:01 | 25.126 |
| 6/22/2010 08:48:00 | 24.0 | 2/17/2011 08:13:01 | 25.126 |
| 6/22/2010 09:23:00 | 24.0 | 2/17/2011 08:49:01 | 25.126 |
| 6/22/2010 09:58:00 | 24.0 | 2/17/2011 09:25:01 | 25.126 |
| 6/22/2010 10:33:00 | 24.0 | 2/17/2011 10:01:01 | 25.126 |
| 6/22/2010 11:08:00 | 24.0 | 2/17/2011 10:37:01 | 25.126 |
| 6/22/2010 11:43:00 | 24.0 | 2/17/2011 11:13:01 | 25.126 |
| 6/22/2010 12:18:00 | 24.0 | 2/17/2011 11:49:01 | 25.126 |
| 6/22/2010 12:53:00 | 24.0 | 2/17/2011 12:25:01 | 25.126 |
| 6/22/2010 13:28:00 | 24.0 | 2/17/2011 13:01:01 | 25.126 |
| 6/22/2010 14:03:00 | 24.0 | 2/17/2011 13:37:01 | 25.126 |

|                    |      |                    |        |
|--------------------|------|--------------------|--------|
| 6/22/2010 14:38:00 | 24.0 | 2/17/2011 14:13:01 | 25.126 |
| 6/22/2010 15:13:00 | 24.0 | 2/17/2011 14:49:01 | 25.126 |
| 6/22/2010 15:48:00 | 24.0 | 2/17/2011 15:25:01 | 25.126 |
| 6/22/2010 16:23:00 | 24.0 | 2/17/2011 16:01:01 | 25.126 |
| 6/22/2010 16:58:00 | 24.0 | 2/17/2011 16:37:01 | 25.126 |
| 6/22/2010 17:33:00 | 24.0 | 2/17/2011 17:13:01 | 25.126 |
| 6/22/2010 18:08:00 | 24.0 | 2/17/2011 17:49:01 | 25.126 |
| 6/22/2010 18:43:00 | 24.0 | 2/17/2011 18:25:01 | 25.126 |
| 6/22/2010 19:18:00 | 24.0 | 2/17/2011 19:01:01 | 25.126 |
| 6/22/2010 19:53:00 | 24.0 | 2/17/2011 19:37:01 | 25.126 |
| 6/22/2010 20:28:00 | 24.0 | 2/17/2011 20:13:01 | 25.126 |
| 6/22/2010 21:03:00 | 24.5 | 2/17/2011 20:49:01 | 25.126 |
| 6/22/2010 21:38:00 | 24.5 | 2/17/2011 21:25:01 | 25.126 |
| 6/22/2010 22:13:00 | 24.5 | 2/17/2011 22:01:01 | 25.126 |
| 6/22/2010 22:48:00 | 24.5 | 2/17/2011 22:37:01 | 25.126 |
| 6/22/2010 23:23:00 | 24.5 | 2/17/2011 23:13:01 | 25.126 |
| 6/22/2010 23:58:00 | 24.5 | 2/17/2011 23:49:01 | 25.126 |
| 6/23/2010 00:33:00 | 24.5 | 2/18/2011 00:25:01 | 25.126 |
| 6/23/2010 01:08:00 | 24.5 | 2/18/2011 01:01:01 | 25.126 |
| 6/23/2010 01:43:00 | 24.5 | 2/18/2011 01:37:01 | 25.126 |
| 6/23/2010 02:18:00 | 24.5 | 2/18/2011 02:13:01 | 25.126 |
| 6/23/2010 02:53:00 | 24.5 | 2/18/2011 02:49:01 | 25.126 |
| 6/23/2010 03:28:00 | 24.0 | 2/18/2011 03:25:01 | 25.126 |
| 6/23/2010 04:03:00 | 24.0 | 2/18/2011 04:01:01 | 24.626 |
| 6/23/2010 04:38:00 | 24.0 | 2/18/2011 04:37:01 | 25.126 |
| 6/23/2010 05:13:00 | 24.0 | 2/18/2011 05:13:01 | 25.126 |
| 6/23/2010 05:48:00 | 24.0 | 2/18/2011 05:49:01 | 25.126 |
| 6/23/2010 06:23:00 | 24.0 | 2/18/2011 06:25:01 | 25.126 |
| 6/23/2010 06:58:00 | 24.0 | 2/18/2011 07:01:01 | 25.126 |
| 6/23/2010 07:33:00 | 24.0 | 2/18/2011 07:37:01 | 25.126 |
| 6/23/2010 08:08:00 | 24.0 | 2/18/2011 08:13:01 | 25.126 |
| 6/23/2010 08:43:00 | 24.0 | 2/18/2011 08:49:01 | 25.126 |
| 6/23/2010 09:18:00 | 24.0 | 2/18/2011 09:25:01 | 25.126 |
| 6/23/2010 09:53:00 | 24.0 | 2/18/2011 10:01:01 | 25.126 |
| 6/23/2010 10:28:00 | 24.0 | 2/18/2011 10:37:01 | 24.626 |
| 6/23/2010 11:03:00 | 24.0 | 2/18/2011 11:13:01 | 25.126 |
| 6/23/2010 11:38:00 | 24.0 | 2/18/2011 11:49:01 | 25.126 |
| 6/23/2010 12:13:00 | 24.0 | 2/18/2011 12:25:01 | 25.126 |
| 6/23/2010 12:48:00 | 24.0 | 2/18/2011 13:01:01 | 25.126 |
| 6/23/2010 13:23:00 | 24.0 | 2/18/2011 13:37:01 | 25.126 |
| 6/23/2010 13:58:00 | 24.0 | 2/18/2011 14:13:01 | 25.126 |
| 6/23/2010 14:33:00 | 24.0 | 2/18/2011 14:49:01 | 25.126 |
| 6/23/2010 15:08:00 | 24.0 | 2/18/2011 15:25:01 | 25.126 |
| 6/23/2010 15:43:00 | 24.0 | 2/18/2011 16:01:01 | 25.126 |
| 6/23/2010 16:18:00 | 24.0 | 2/18/2011 16:37:01 | 25.126 |
| 6/23/2010 16:53:00 | 24.0 | 2/18/2011 17:13:01 | 25.126 |
| 6/23/2010 17:28:00 | 24.0 | 2/18/2011 17:49:01 | 25.126 |
| 6/23/2010 18:03:00 | 24.0 | 2/18/2011 18:25:01 | 25.126 |
| 6/23/2010 18:38:00 | 24.0 | 2/18/2011 19:01:01 | 25.126 |
| 6/23/2010 19:13:00 | 24.0 | 2/18/2011 19:37:01 | 25.126 |

|                    |      |                    |        |
|--------------------|------|--------------------|--------|
| 6/23/2010 19:48:00 | 24.0 | 2/18/2011 20:13:01 | 25.126 |
| 6/23/2010 20:23:00 | 24.0 | 2/18/2011 20:49:01 | 25.126 |
| 6/23/2010 20:58:00 | 24.0 | 2/18/2011 21:25:01 | 25.126 |
| 6/23/2010 21:33:00 | 24.0 | 2/18/2011 22:01:01 | 25.126 |
| 6/23/2010 22:08:00 | 24.0 | 2/18/2011 22:37:01 | 25.126 |
| 6/23/2010 22:43:00 | 24.0 | 2/18/2011 23:13:01 | 25.126 |
| 6/23/2010 23:18:00 | 24.0 | 2/18/2011 23:49:01 | 25.126 |
| 6/23/2010 23:53:00 | 24.0 | 2/19/2011 00:25:01 | 25.126 |
| 6/24/2010 00:28:00 | 24.0 | 2/19/2011 01:01:01 | 25.126 |
| 6/24/2010 01:03:00 | 24.0 | 2/19/2011 01:37:01 | 25.126 |
| 6/24/2010 01:38:00 | 24.0 | 2/19/2011 02:13:01 | 25.126 |
| 6/24/2010 02:13:00 | 24.0 | 2/19/2011 02:49:01 | 25.126 |
| 6/24/2010 02:48:00 | 24.0 | 2/19/2011 03:25:01 | 25.126 |
| 6/24/2010 03:23:00 | 24.0 | 2/19/2011 04:01:01 | 25.126 |
| 6/24/2010 03:58:00 | 24.0 | 2/19/2011 04:37:01 | 25.126 |
| 6/24/2010 04:33:00 | 24.0 | 2/19/2011 05:13:01 | 25.126 |
| 6/24/2010 05:08:00 | 24.0 | 2/19/2011 05:49:01 | 25.126 |
| 6/24/2010 05:43:00 | 24.0 | 2/19/2011 06:25:01 | 25.126 |
| 6/24/2010 06:18:00 | 24.0 | 2/19/2011 07:01:01 | 25.126 |
| 6/24/2010 06:53:00 | 24.0 | 2/19/2011 07:37:01 | 25.126 |
| 6/24/2010 07:28:00 | 24.0 | 2/19/2011 08:13:01 | 25.126 |
| 6/24/2010 08:03:00 | 24.0 | 2/19/2011 08:49:01 | 25.126 |
| 6/24/2010 08:38:00 | 24.0 | 2/19/2011 09:25:01 | 25.126 |
| 6/24/2010 09:13:00 | 24.0 | 2/19/2011 10:01:01 | 25.126 |
| 6/24/2010 09:48:00 | 24.0 | 2/19/2011 10:37:01 | 25.126 |
| 6/24/2010 10:23:00 | 24.0 | 2/19/2011 11:13:01 | 25.126 |
| 6/24/2010 10:58:00 | 24.0 | 2/19/2011 11:49:01 | 25.126 |
| 6/24/2010 11:33:00 | 24.0 | 2/19/2011 12:25:01 | 25.126 |
| 6/24/2010 12:08:00 | 24.0 | 2/19/2011 13:01:01 | 25.126 |
| 6/24/2010 12:43:00 | 24.0 | 2/19/2011 13:37:01 | 25.126 |
| 6/24/2010 13:18:00 | 24.0 | 2/19/2011 14:13:01 | 25.625 |
| 6/24/2010 13:53:00 | 24.0 | 2/19/2011 14:49:01 | 25.625 |
| 6/24/2010 14:28:00 | 24.0 | 2/19/2011 15:25:01 | 25.625 |
| 6/24/2010 15:03:00 | 24.0 | 2/19/2011 16:01:01 | 25.625 |
| 6/24/2010 15:38:00 | 24.0 | 2/19/2011 16:37:01 | 25.625 |
| 6/24/2010 16:13:00 | 24.0 | 2/19/2011 17:13:01 | 25.625 |
| 6/24/2010 16:48:00 | 24.0 | 2/19/2011 17:49:01 | 25.625 |
| 6/24/2010 17:23:00 | 24.0 | 2/19/2011 18:25:01 | 25.625 |
| 6/24/2010 17:58:00 | 24.0 | 2/19/2011 19:01:01 | 25.625 |
| 6/24/2010 18:33:00 | 24.0 | 2/19/2011 19:37:01 | 25.625 |
| 6/24/2010 19:08:00 | 24.0 | 2/19/2011 20:13:01 | 25.126 |
| 6/24/2010 19:43:00 | 24.0 | 2/19/2011 20:49:01 | 25.126 |
| 6/24/2010 20:18:00 | 24.0 | 2/19/2011 21:25:01 | 25.126 |
| 6/24/2010 20:53:00 | 24.0 | 2/19/2011 22:01:01 | 25.126 |
| 6/24/2010 21:28:00 | 24.0 | 2/19/2011 22:37:01 | 25.126 |
| 6/24/2010 22:03:00 | 24.0 | 2/19/2011 23:13:01 | 25.126 |
| 6/24/2010 22:38:00 | 24.0 | 2/19/2011 23:49:01 | 25.126 |
| 6/24/2010 23:13:00 | 24.0 | 2/20/2011 00:25:01 | 25.126 |
| 6/24/2010 23:48:00 | 24.0 | 2/20/2011 01:01:01 | 25.126 |
| 6/25/2010 00:23:00 | 24.0 | 2/20/2011 01:37:01 | 25.126 |



|                    |      |                    |        |
|--------------------|------|--------------------|--------|
| 6/25/2010 00:58:00 | 24.0 | 2/20/2011 02:13:01 | 25.126 |
| 6/25/2010 01:33:00 | 24.0 | 2/20/2011 02:49:01 | 25.126 |
| 6/25/2010 02:08:00 | 24.0 | 2/20/2011 03:25:01 | 25.126 |
| 6/25/2010 02:43:00 | 24.0 | 2/20/2011 04:01:01 | 25.126 |
| 6/25/2010 03:18:00 | 24.0 | 2/20/2011 04:37:01 | 25.126 |
| 6/25/2010 03:53:00 | 24.0 | 2/20/2011 05:13:01 | 25.126 |
| 6/25/2010 04:28:00 | 24.0 | 2/20/2011 05:49:01 | 25.126 |
| 6/25/2010 05:03:00 | 24.0 | 2/20/2011 06:25:01 | 25.126 |
| 6/25/2010 05:38:00 | 24.0 | 2/20/2011 07:01:01 | 25.126 |
| 6/25/2010 06:13:00 | 24.0 | 2/20/2011 07:37:01 | 25.126 |
| 6/25/2010 06:48:00 | 24.0 | 2/20/2011 08:13:01 | 25.126 |
| 6/25/2010 07:23:00 | 24.0 | 2/20/2011 08:49:01 | 25.126 |
| 6/25/2010 07:58:00 | 24.0 | 2/20/2011 09:25:01 | 25.625 |
| 6/25/2010 08:33:00 | 24.0 | 2/20/2011 10:01:01 | 25.625 |
| 6/25/2010 09:08:00 | 24.0 | 2/20/2011 10:37:01 | 25.625 |
| 6/25/2010 09:43:00 | 24.0 | 2/20/2011 11:13:01 | 25.126 |
| 6/25/2010 10:18:00 | 23.5 | 2/20/2011 11:49:01 | 25.625 |
| 6/25/2010 10:53:00 | 23.5 | 2/20/2011 12:25:01 | 25.126 |
| 6/25/2010 11:28:00 | 23.5 | 2/20/2011 13:01:01 | 25.126 |
| 6/25/2010 12:03:00 | 23.5 | 2/20/2011 13:37:01 | 25.625 |
| 6/25/2010 12:38:00 | 23.5 | 2/20/2011 14:13:01 | 25.126 |
| 6/25/2010 13:13:00 | 23.5 | 2/20/2011 14:49:01 | 25.126 |
| 6/25/2010 13:48:00 | 23.5 | 2/20/2011 15:25:01 | 25.625 |
| 6/25/2010 14:23:00 | 23.5 | 2/20/2011 16:01:01 | 25.625 |
| 6/25/2010 14:58:00 | 24.0 | 2/20/2011 16:37:01 | 25.625 |
| 6/25/2010 15:33:00 | 24.0 | 2/20/2011 17:13:01 | 25.625 |
| 6/25/2010 16:08:00 | 24.0 | 2/20/2011 17:49:01 | 25.625 |
| 6/25/2010 16:43:00 | 24.0 | 2/20/2011 18:25:01 | 25.625 |
| 6/25/2010 17:18:00 | 24.0 | 2/20/2011 19:01:01 | 25.625 |
| 6/25/2010 17:53:00 | 24.0 | 2/20/2011 19:37:01 | 25.625 |
| 6/25/2010 18:28:00 | 24.0 | 2/20/2011 20:13:01 | 25.625 |
| 6/25/2010 19:03:00 | 24.0 | 2/20/2011 20:49:01 | 25.625 |
| 6/25/2010 19:38:00 | 24.0 | 2/20/2011 21:25:01 | 25.625 |
| 6/25/2010 20:13:00 | 24.0 | 2/20/2011 22:01:01 | 25.625 |
| 6/25/2010 20:48:00 | 24.0 | 2/20/2011 22:37:01 | 25.625 |
| 6/25/2010 21:23:00 | 24.0 | 2/20/2011 23:13:01 | 25.625 |
| 6/25/2010 21:58:00 | 24.0 | 2/20/2011 23:49:01 | 25.625 |
| 6/25/2010 22:33:00 | 24.0 | 2/21/2011 00:25:01 | 25.625 |
| 6/25/2010 23:08:00 | 24.0 | 2/21/2011 01:01:01 | 25.625 |
| 6/25/2010 23:43:00 | 24.0 | 2/21/2011 01:37:01 | 25.625 |
| 6/26/2010 00:18:00 | 24.0 | 2/21/2011 02:13:01 | 25.625 |
| 6/26/2010 00:53:00 | 24.0 | 2/21/2011 02:49:01 | 25.625 |
| 6/26/2010 01:28:00 | 24.0 | 2/21/2011 03:25:01 | 25.625 |
| 6/26/2010 02:03:00 | 24.0 | 2/21/2011 04:01:01 | 25.625 |
| 6/26/2010 02:38:00 | 24.0 | 2/21/2011 04:37:01 | 25.625 |
| 6/26/2010 03:13:00 | 24.0 | 2/21/2011 05:13:01 | 26.125 |
| 6/26/2010 03:48:00 | 24.0 | 2/21/2011 05:49:01 | 26.125 |
| 6/26/2010 04:23:00 | 24.0 | 2/21/2011 06:25:01 | 26.125 |
| 6/26/2010 04:58:00 | 24.0 | 2/21/2011 07:01:01 | 25.625 |
| 6/26/2010 05:33:00 | 24.0 | 2/21/2011 07:37:01 | 25.625 |

|                    |      |                    |        |
|--------------------|------|--------------------|--------|
| 6/26/2010 06:08:00 | 24.0 | 2/21/2011 08:13:01 | 25.625 |
| 6/26/2010 06:43:00 | 24.0 | 2/21/2011 08:49:01 | 25.625 |
| 6/26/2010 07:18:00 | 24.0 | 2/21/2011 09:25:01 | 25.625 |
| 6/26/2010 07:53:00 | 23.5 | 2/21/2011 10:01:01 | 25.625 |
| 6/26/2010 08:28:00 | 23.5 | 2/21/2011 10:37:01 | 25.625 |
| 6/26/2010 09:03:00 | 23.5 | 2/21/2011 11:13:01 | 25.625 |
| 6/26/2010 09:38:00 | 23.5 | 2/21/2011 11:49:01 | 25.625 |
| 6/26/2010 10:13:00 | 23.5 | 2/21/2011 12:25:01 | 25.625 |
| 6/26/2010 10:48:00 | 23.5 | 2/21/2011 13:01:01 | 25.625 |
| 6/26/2010 11:23:00 | 23.5 | 2/21/2011 13:37:01 | 25.625 |
| 6/26/2010 11:58:00 | 23.5 | 2/21/2011 14:13:01 | 25.625 |
| 6/26/2010 12:33:00 | 23.5 | 2/21/2011 14:49:01 | 25.625 |
| 6/26/2010 13:08:00 | 23.5 | 2/21/2011 15:25:01 | 25.625 |
| 6/26/2010 13:43:00 | 23.5 | 2/21/2011 16:01:01 | 25.625 |
| 6/26/2010 14:18:00 | 24.0 | 2/21/2011 16:37:01 | 25.625 |
| 6/26/2010 14:53:00 | 24.0 | 2/21/2011 17:13:01 | 25.625 |
| 6/26/2010 15:28:00 | 24.0 | 2/21/2011 17:49:01 | 25.625 |
| 6/26/2010 16:03:00 | 24.0 | 2/21/2011 18:25:01 | 25.625 |
| 6/26/2010 16:38:00 | 24.0 | 2/21/2011 19:01:01 | 25.625 |
| 6/26/2010 17:13:00 | 24.0 | 2/21/2011 19:37:01 | 25.625 |
| 6/26/2010 17:48:00 | 24.0 | 2/21/2011 20:13:01 | 25.625 |
| 6/26/2010 18:23:00 | 24.0 | 2/21/2011 20:49:01 | 25.625 |
| 6/26/2010 18:58:00 | 24.0 | 2/21/2011 21:25:01 | 25.625 |
| 6/26/2010 19:33:00 | 24.0 | 2/21/2011 22:01:01 | 25.625 |
| 6/26/2010 20:08:00 | 24.0 | 2/21/2011 22:37:01 | 25.625 |
| 6/26/2010 20:43:00 | 24.0 | 2/21/2011 23:13:01 | 25.625 |
| 6/26/2010 21:18:00 | 24.0 | 2/21/2011 23:49:01 | 25.625 |
| 6/26/2010 21:53:00 | 24.0 | 2/22/2011 00:25:01 | 25.625 |
| 6/26/2010 22:28:00 | 24.0 | 2/22/2011 01:01:01 | 25.625 |
| 6/26/2010 23:03:00 | 24.0 | 2/22/2011 01:37:01 | 25.625 |
| 6/26/2010 23:38:00 | 24.0 | 2/22/2011 02:13:01 | 25.625 |
| 6/27/2010 00:13:00 | 24.0 | 2/22/2011 02:49:01 | 25.625 |
| 6/27/2010 00:48:00 | 24.0 | 2/22/2011 03:25:01 | 25.625 |
| 6/27/2010 01:23:00 | 24.0 | 2/22/2011 04:01:01 | 25.625 |
| 6/27/2010 01:58:00 | 24.0 | 2/22/2011 04:37:01 | 25.625 |
| 6/27/2010 02:33:00 | 24.0 | 2/22/2011 05:13:01 | 25.625 |
| 6/27/2010 03:08:00 | 24.0 | 2/22/2011 05:49:01 | 25.625 |
| 6/27/2010 03:43:00 | 24.0 | 2/22/2011 06:25:01 | 25.625 |
| 6/27/2010 04:18:00 | 24.0 | 2/22/2011 07:01:01 | 25.625 |
| 6/27/2010 04:53:00 | 24.0 | 2/22/2011 07:37:01 | 25.625 |
| 6/27/2010 05:28:00 | 24.0 | 2/22/2011 08:13:01 | 25.625 |
| 6/27/2010 06:03:00 | 24.0 | 2/22/2011 08:49:01 | 25.625 |
| 6/27/2010 06:38:00 | 24.0 | 2/22/2011 09:25:01 | 25.625 |
| 6/27/2010 07:13:00 | 24.0 | 2/22/2011 10:01:01 | 25.625 |
| 6/27/2010 07:48:00 | 24.0 | 2/22/2011 10:37:01 | 25.625 |
| 6/27/2010 08:23:00 | 24.0 | 2/22/2011 11:13:01 | 25.625 |
| 6/27/2010 08:58:00 | 24.0 | 2/22/2011 11:49:01 | 25.625 |
| 6/27/2010 09:33:00 | 24.0 | 2/22/2011 12:25:01 | 25.625 |
| 6/27/2010 10:08:00 | 24.0 | 2/22/2011 13:01:01 | 25.625 |
| 6/27/2010 10:43:00 | 24.0 | 2/22/2011 13:37:01 | 25.625 |

|                    |      |                    |        |
|--------------------|------|--------------------|--------|
| 6/27/2010 11:18:00 | 24.0 | 2/22/2011 14:13:01 | 25.625 |
| 6/27/2010 11:53:00 | 24.0 | 2/22/2011 14:49:01 | 25.625 |
| 6/27/2010 12:28:00 | 24.0 | 2/22/2011 15:25:01 | 25.625 |
| 6/27/2010 13:03:00 | 24.0 | 2/22/2011 16:01:01 | 25.625 |
| 6/27/2010 13:38:00 | 24.0 | 2/22/2011 16:37:01 | 25.625 |
| 6/27/2010 14:13:00 | 24.0 | 2/22/2011 17:13:01 | 25.625 |
| 6/27/2010 14:48:00 | 24.0 | 2/22/2011 17:49:01 | 25.625 |
| 6/27/2010 15:23:00 | 24.0 | 2/22/2011 18:25:01 | 25.625 |
| 6/27/2010 15:58:00 | 24.0 | 2/22/2011 19:01:01 | 25.625 |
| 6/27/2010 16:33:00 | 24.0 | 2/22/2011 19:37:01 | 25.625 |
| 6/27/2010 17:08:00 | 24.0 | 2/22/2011 20:13:01 | 26.125 |
| 6/27/2010 17:43:00 | 24.5 | 2/22/2011 20:49:01 | 26.125 |
| 6/27/2010 18:18:00 | 24.5 | 2/22/2011 21:25:01 | 26.125 |
| 6/27/2010 18:53:00 | 24.5 | 2/22/2011 22:01:01 | 26.125 |
| 6/27/2010 19:28:00 | 24.5 | 2/22/2011 22:37:01 | 26.125 |
| 6/27/2010 20:03:00 | 24.5 | 2/22/2011 23:13:01 | 25.625 |
| 6/27/2010 20:38:00 | 24.5 | 2/22/2011 23:49:01 | 25.625 |
| 6/27/2010 21:13:00 | 24.5 | 2/23/2011 00:25:01 | 25.625 |
| 6/27/2010 21:48:00 | 24.5 | 2/23/2011 01:01:01 | 25.625 |
| 6/27/2010 22:23:00 | 24.5 | 2/23/2011 01:37:01 | 25.625 |
| 6/27/2010 22:58:00 | 24.5 | 2/23/2011 02:13:01 | 25.625 |
| 6/27/2010 23:33:00 | 24.5 | 2/23/2011 02:49:01 | 25.625 |
| 6/28/2010 00:08:00 | 24.5 | 2/23/2011 03:25:01 | 25.625 |
| 6/28/2010 00:43:00 | 24.5 | 2/23/2011 04:01:01 | 25.625 |
| 6/28/2010 01:18:00 | 24.5 | 2/23/2011 04:37:01 | 25.625 |
| 6/28/2010 01:53:00 | 24.5 | 2/23/2011 05:13:01 | 25.625 |
| 6/28/2010 02:28:00 | 24.5 | 2/23/2011 05:49:01 | 25.625 |
| 6/28/2010 03:03:00 | 24.5 | 2/23/2011 06:25:01 | 25.625 |
| 6/28/2010 03:38:00 | 24.5 | 2/23/2011 07:01:01 | 25.625 |
| 6/28/2010 04:13:00 | 24.5 | 2/23/2011 07:37:01 | 25.625 |
| 6/28/2010 04:48:00 | 24.0 | 2/23/2011 08:13:01 | 25.625 |
| 6/28/2010 05:23:00 | 24.0 | 2/23/2011 08:49:01 | 25.625 |
| 6/28/2010 05:58:00 | 24.0 | 2/23/2011 09:25:01 | 25.625 |
| 6/28/2010 06:33:00 | 24.0 | 2/23/2011 10:01:01 | 25.625 |
| 6/28/2010 07:08:00 | 24.0 | 2/23/2011 10:37:01 | 25.625 |
| 6/28/2010 07:43:00 | 24.0 | 2/23/2011 11:13:01 | 25.625 |
| 6/28/2010 08:18:00 | 24.0 | 2/23/2011 11:49:01 | 25.625 |
| 6/28/2010 08:53:00 | 24.0 | 2/23/2011 12:25:01 | 25.625 |
| 6/28/2010 09:28:00 | 24.0 | 2/23/2011 13:01:01 | 25.625 |
| 6/28/2010 10:03:00 | 24.0 | 2/23/2011 13:37:01 | 25.625 |
| 6/28/2010 10:38:00 | 24.0 | 2/23/2011 14:13:01 | 25.625 |
| 6/28/2010 11:13:00 | 24.0 | 2/23/2011 14:49:01 | 25.625 |
| 6/28/2010 11:48:00 | 24.0 | 2/23/2011 15:25:01 | 25.625 |
| 6/28/2010 12:23:00 | 24.0 | 2/23/2011 16:01:01 | 25.625 |
| 6/28/2010 12:58:00 | 24.0 | 2/23/2011 16:37:01 | 25.625 |
| 6/28/2010 13:33:00 | 24.0 | 2/23/2011 17:13:01 | 25.625 |
| 6/28/2010 14:08:00 | 24.0 | 2/23/2011 17:49:01 | 25.625 |
| 6/28/2010 14:43:00 | 24.0 | 2/23/2011 18:25:01 | 25.625 |
| 6/28/2010 15:18:00 | 24.0 | 2/23/2011 19:01:01 | 25.625 |
| 6/28/2010 15:53:00 | 24.0 | 2/23/2011 19:37:01 | 25.625 |

|                    |      |                    |        |
|--------------------|------|--------------------|--------|
| 6/28/2010 16:28:00 | 24.0 | 2/23/2011 20:13:01 | 25.625 |
| 6/28/2010 17:03:00 | 24.5 | 2/23/2011 20:49:01 | 25.625 |
| 6/28/2010 17:38:00 | 24.5 | 2/23/2011 21:25:01 | 25.625 |
| 6/28/2010 18:13:00 | 24.0 | 2/23/2011 22:01:01 | 25.625 |
| 6/28/2010 18:48:00 | 24.5 | 2/23/2011 22:37:01 | 25.625 |
| 6/28/2010 19:23:00 | 24.5 | 2/23/2011 23:13:01 | 25.625 |
| 6/28/2010 19:58:00 | 24.5 | 2/23/2011 23:49:01 | 25.625 |
| 6/28/2010 20:33:00 | 24.5 | 2/24/2011 00:25:01 | 25.625 |
| 6/28/2010 21:08:00 | 24.5 | 2/24/2011 01:01:01 | 25.625 |
| 6/28/2010 21:43:00 | 24.5 | 2/24/2011 01:37:01 | 25.625 |
| 6/28/2010 22:18:00 | 24.5 | 2/24/2011 02:13:01 | 25.625 |
| 6/28/2010 22:53:00 | 24.5 | 2/24/2011 02:49:01 | 25.625 |
| 6/28/2010 23:28:00 | 24.5 | 2/24/2011 03:25:01 | 25.625 |
| 6/29/2010 00:03:00 | 24.5 | 2/24/2011 04:01:01 | 25.625 |
| 6/29/2010 00:38:00 | 24.5 | 2/24/2011 04:37:01 | 25.625 |
| 6/29/2010 01:13:00 | 24.0 | 2/24/2011 05:13:01 | 25.625 |
| 6/29/2010 01:48:00 | 24.0 | 2/24/2011 05:49:01 | 25.625 |
| 6/29/2010 02:23:00 | 24.0 | 2/24/2011 06:25:01 | 25.625 |
| 6/29/2010 02:58:00 | 24.0 | 2/24/2011 07:01:01 | 25.625 |
| 6/29/2010 03:33:00 | 24.0 | 2/24/2011 07:37:01 | 25.625 |
| 6/29/2010 04:08:00 | 24.0 | 2/24/2011 08:13:01 | 25.625 |
| 6/29/2010 04:43:00 | 24.0 | 2/24/2011 08:49:01 | 25.625 |
| 6/29/2010 05:18:00 | 24.0 | 2/24/2011 09:25:01 | 25.625 |
| 6/29/2010 05:53:00 | 24.0 | 2/24/2011 10:01:01 | 25.625 |
| 6/29/2010 06:28:00 | 24.0 | 2/24/2011 10:37:01 | 25.625 |
| 6/29/2010 07:03:00 | 24.0 | 2/24/2011 11:13:01 | 25.625 |
| 6/29/2010 07:38:00 | 24.0 | 2/24/2011 11:49:01 | 25.625 |
| 6/29/2010 08:13:00 | 24.0 | 2/24/2011 12:25:01 | 25.625 |
| 6/29/2010 08:48:00 | 24.0 | 2/24/2011 13:01:01 | 25.625 |
| 6/29/2010 09:23:00 | 24.0 | 2/24/2011 13:37:01 | 25.625 |
| 6/29/2010 09:58:00 | 24.0 | 2/24/2011 14:13:01 | 25.625 |
| 6/29/2010 10:33:00 | 24.0 | 2/24/2011 14:49:01 | 25.126 |
| 6/29/2010 11:08:00 | 24.0 | 2/24/2011 15:25:01 | 25.126 |
| 6/29/2010 11:43:00 | 24.0 | 2/24/2011 16:01:01 | 25.126 |
| 6/29/2010 12:18:00 | 24.0 | 2/24/2011 16:37:01 | 25.126 |
| 6/29/2010 12:53:00 | 24.0 | 2/24/2011 17:13:01 | 25.126 |
| 6/29/2010 13:28:00 | 24.0 | 2/24/2011 17:49:01 | 25.625 |
| 6/29/2010 14:03:00 | 24.0 | 2/24/2011 18:25:01 | 25.625 |
| 6/29/2010 14:38:00 | 24.0 | 2/24/2011 19:01:01 | 25.625 |
| 6/29/2010 15:13:00 | 24.0 | 2/24/2011 19:37:01 | 25.625 |
| 6/29/2010 15:48:00 | 24.0 | 2/24/2011 20:13:01 | 25.625 |
| 6/29/2010 16:23:00 | 24.0 | 2/24/2011 20:49:01 | 25.625 |
| 6/29/2010 16:58:00 | 24.0 | 2/24/2011 21:25:01 | 25.625 |
| 6/29/2010 17:33:00 | 24.0 | 2/24/2011 22:01:01 | 25.625 |
| 6/29/2010 18:08:00 | 24.0 | 2/24/2011 22:37:01 | 25.625 |
| 6/29/2010 18:43:00 | 24.0 | 2/24/2011 23:13:01 | 25.625 |
| 6/29/2010 19:18:00 | 24.0 | 2/24/2011 23:49:01 | 25.625 |
| 6/29/2010 19:53:00 | 24.0 | 2/25/2011 00:25:01 | 25.625 |
| 6/29/2010 20:28:00 | 24.0 | 2/25/2011 01:01:01 | 25.625 |
| 6/29/2010 21:03:00 | 24.0 | 2/25/2011 01:37:01 | 25.625 |

|                    |      |                    |        |
|--------------------|------|--------------------|--------|
| 6/29/2010 21:38:00 | 24.0 | 2/25/2011 02:13:01 | 25.625 |
| 6/29/2010 22:13:00 | 24.0 | 2/25/2011 02:49:01 | 25.625 |
| 6/29/2010 22:48:00 | 24.0 | 2/25/2011 03:25:01 | 25.625 |
| 6/29/2010 23:23:00 | 24.0 | 2/25/2011 04:01:01 | 25.625 |
| 6/29/2010 23:58:00 | 24.0 | 2/25/2011 04:37:01 | 25.625 |
| 6/30/2010 00:33:00 | 24.0 | 2/25/2011 05:13:01 | 25.625 |
| 6/30/2010 01:08:00 | 24.0 | 2/25/2011 05:49:01 | 25.625 |
| 6/30/2010 01:43:00 | 24.0 | 2/25/2011 06:25:01 | 25.625 |
| 6/30/2010 02:18:00 | 24.0 | 2/25/2011 07:01:01 | 25.625 |
| 6/30/2010 02:53:00 | 24.0 | 2/25/2011 07:37:01 | 25.625 |
| 6/30/2010 03:28:00 | 24.0 | 2/25/2011 08:13:01 | 25.625 |
| 6/30/2010 04:03:00 | 24.0 | 2/25/2011 08:49:01 | 25.625 |
| 6/30/2010 04:38:00 | 24.0 | 2/25/2011 09:25:01 | 25.625 |
| 6/30/2010 05:13:00 | 24.0 | 2/25/2011 10:01:01 | 25.625 |
| 6/30/2010 05:48:00 | 24.0 | 2/25/2011 10:37:01 | 25.625 |
| 6/30/2010 06:23:00 | 24.0 | 2/25/2011 11:13:01 | 25.625 |
| 6/30/2010 06:58:00 | 24.0 | 2/25/2011 11:49:01 | 25.625 |
| 6/30/2010 07:33:00 | 24.0 | 2/25/2011 12:25:01 | 25.625 |
| 6/30/2010 08:08:00 | 24.0 | 2/25/2011 13:01:01 | 25.625 |
| 6/30/2010 08:43:00 | 24.0 | 2/25/2011 13:37:01 | 25.625 |
| 6/30/2010 09:18:00 | 24.0 | 2/25/2011 14:13:01 | 25.625 |
| 6/30/2010 09:53:00 | 24.0 | 2/25/2011 14:49:01 | 25.625 |
| 6/30/2010 10:28:00 | 24.0 | 2/25/2011 15:25:01 | 25.625 |
| 6/30/2010 11:03:00 | 24.0 | 2/25/2011 16:01:01 | 25.625 |
| 6/30/2010 11:38:00 | 24.0 | 2/25/2011 16:37:01 | 25.625 |
| 6/30/2010 12:13:00 | 24.0 | 2/25/2011 17:13:01 | 25.625 |
| 6/30/2010 12:48:00 | 24.0 | 2/25/2011 17:49:01 | 25.625 |
| 6/30/2010 13:23:00 | 24.0 | 2/25/2011 18:25:01 | 25.625 |
| 6/30/2010 13:58:00 | 24.0 | 2/25/2011 19:01:01 | 25.625 |
| 6/30/2010 14:33:00 | 24.0 | 2/25/2011 19:37:01 | 25.625 |
| 6/30/2010 15:08:00 | 24.0 | 2/25/2011 20:13:01 | 25.625 |
| 6/30/2010 15:43:00 | 24.0 | 2/25/2011 20:49:01 | 25.625 |
| 6/30/2010 16:18:00 | 24.0 | 2/25/2011 21:25:01 | 25.625 |
| 6/30/2010 16:53:00 | 24.0 | 2/25/2011 22:01:01 | 25.625 |
| 6/30/2010 17:28:00 | 24.0 | 2/25/2011 22:37:01 | 25.625 |
| 6/30/2010 18:03:00 | 24.0 | 2/25/2011 23:13:01 | 25.625 |
| 6/30/2010 18:38:00 | 24.0 | 2/25/2011 23:49:01 | 25.625 |
| 6/30/2010 19:13:00 | 24.0 | 2/26/2011 00:25:01 | 25.625 |
| 6/30/2010 19:48:00 | 24.0 | 2/26/2011 01:01:01 | 25.625 |
| 6/30/2010 20:23:00 | 24.0 | 2/26/2011 01:37:01 | 25.625 |
| 6/30/2010 20:58:00 | 24.0 | 2/26/2011 02:13:01 | 25.625 |
| 6/30/2010 21:33:00 | 24.0 | 2/26/2011 02:49:01 | 25.625 |
| 6/30/2010 22:08:00 | 24.0 | 2/26/2011 03:25:01 | 25.625 |
| 6/30/2010 22:43:00 | 24.0 | 2/26/2011 04:01:01 | 25.625 |
| 6/30/2010 23:18:00 | 24.0 | 2/26/2011 04:37:01 | 25.625 |
| 6/30/2010 23:53:00 | 24.0 | 2/26/2011 05:13:01 | 25.625 |
| 7/1/2010 00:28:00  | 24.0 | 2/26/2011 05:49:01 | 25.625 |
| 7/1/2010 01:03:00  | 24.0 | 2/26/2011 06:25:01 | 25.625 |
| 7/1/2010 01:38:00  | 24.0 | 2/26/2011 07:01:01 | 25.625 |
| 7/1/2010 02:13:00  | 24.0 | 2/26/2011 07:37:01 | 25.625 |

|                   |      |                    |        |
|-------------------|------|--------------------|--------|
| 7/1/2010 02:48:00 | 24.0 | 2/26/2011 08:13:01 | 25.625 |
| 7/1/2010 03:23:00 | 24.0 | 2/26/2011 08:49:01 | 25.625 |
| 7/1/2010 03:58:00 | 24.0 | 2/26/2011 09:25:01 | 25.625 |
| 7/1/2010 04:33:00 | 24.0 | 2/26/2011 10:01:01 | 25.625 |
| 7/1/2010 05:08:00 | 24.0 | 2/26/2011 10:37:01 | 25.625 |
| 7/1/2010 05:43:00 | 23.5 | 2/26/2011 11:13:01 | 25.625 |
| 7/1/2010 06:18:00 | 23.5 | 2/26/2011 11:49:01 | 25.625 |
| 7/1/2010 06:53:00 | 23.5 | 2/26/2011 12:25:01 | 25.625 |
| 7/1/2010 07:28:00 | 23.5 | 2/26/2011 13:01:01 | 25.625 |
| 7/1/2010 08:03:00 | 23.5 | 2/26/2011 13:37:01 | 25.625 |
| 7/1/2010 08:38:00 | 23.5 | 2/26/2011 14:13:01 | 25.625 |
| 7/1/2010 09:13:00 | 23.5 | 2/26/2011 14:49:01 | 25.625 |
| 7/1/2010 09:48:00 | 23.5 | 2/26/2011 15:25:01 | 25.625 |
| 7/1/2010 10:23:00 | 23.5 | 2/26/2011 16:01:01 | 25.625 |
| 7/1/2010 10:58:00 | 23.5 | 2/26/2011 16:37:01 | 25.625 |
| 7/1/2010 11:33:00 | 23.5 | 2/26/2011 17:13:01 | 25.625 |
| 7/1/2010 12:08:00 | 23.5 | 2/26/2011 17:49:01 | 25.625 |
| 7/1/2010 12:43:00 | 23.5 | 2/26/2011 18:25:01 | 25.625 |
| 7/1/2010 13:18:00 | 23.5 | 2/26/2011 19:01:01 | 25.625 |
| 7/1/2010 13:53:00 | 23.5 | 2/26/2011 19:37:01 | 25.625 |
| 7/1/2010 14:28:00 | 23.5 | 2/26/2011 20:13:01 | 25.625 |
| 7/1/2010 15:03:00 | 23.5 | 2/26/2011 20:49:01 | 25.625 |
| 7/1/2010 15:38:00 | 23.5 | 2/26/2011 21:25:01 | 25.625 |
| 7/1/2010 16:13:00 | 23.5 | 2/26/2011 22:01:01 | 25.625 |
| 7/1/2010 16:48:00 | 23.5 | 2/26/2011 22:37:01 | 25.625 |
| 7/1/2010 17:23:00 | 23.5 | 2/26/2011 23:13:01 | 25.625 |
| 7/1/2010 17:58:00 | 23.5 | 2/26/2011 23:49:01 | 25.625 |
| 7/1/2010 18:33:00 | 23.5 | 2/27/2011 00:25:01 | 25.625 |
| 7/1/2010 19:08:00 | 23.5 | 2/27/2011 01:01:01 | 25.625 |
| 7/1/2010 19:43:00 | 23.5 | 2/27/2011 01:37:01 | 25.625 |
| 7/1/2010 20:18:00 | 23.5 | 2/27/2011 02:13:01 | 25.625 |
| 7/1/2010 20:53:00 | 23.5 | 2/27/2011 02:49:01 | 25.625 |
| 7/1/2010 21:28:00 | 23.5 | 2/27/2011 03:25:01 | 25.625 |
| 7/1/2010 22:03:00 | 23.5 | 2/27/2011 04:01:01 | 25.625 |
| 7/1/2010 22:38:00 | 23.5 | 2/27/2011 04:37:01 | 25.625 |
| 7/1/2010 23:13:00 | 23.5 | 2/27/2011 05:13:01 | 25.625 |
| 7/1/2010 23:48:00 | 23.5 | 2/27/2011 05:49:01 | 25.625 |
| 7/2/2010 00:23:00 | 23.5 | 2/27/2011 06:25:01 | 25.625 |
| 7/2/2010 00:58:00 | 23.5 | 2/27/2011 07:01:01 | 25.625 |
| 7/2/2010 01:33:00 | 23.5 | 2/27/2011 07:37:01 | 25.625 |
| 7/2/2010 02:08:00 | 23.5 | 2/27/2011 08:13:01 | 25.625 |
| 7/2/2010 02:43:00 | 23.5 | 2/27/2011 08:49:01 | 25.625 |
| 7/2/2010 03:18:00 | 23.5 | 2/27/2011 09:25:01 | 25.625 |
| 7/2/2010 03:53:00 | 23.5 | 2/27/2011 10:01:01 | 25.625 |
| 7/2/2010 04:28:00 | 23.5 | 2/27/2011 10:37:01 | 25.625 |
| 7/2/2010 05:03:00 | 23.5 | 2/27/2011 11:13:01 | 25.625 |
| 7/2/2010 05:38:00 | 23.5 | 2/27/2011 11:49:01 | 25.625 |
| 7/2/2010 06:13:00 | 23.5 | 2/27/2011 12:25:01 | 25.625 |
| 7/2/2010 06:48:00 | 23.5 | 2/27/2011 13:01:01 | 25.625 |
| 7/2/2010 07:23:00 | 23.5 | 2/27/2011 13:37:01 | 25.625 |

|                   |      |                    |        |
|-------------------|------|--------------------|--------|
| 7/2/2010 07:58:00 | 23.5 | 2/27/2011 14:13:01 | 25.625 |
| 7/2/2010 08:33:00 | 23.5 | 2/27/2011 14:49:01 | 25.625 |
| 7/2/2010 09:08:00 | 23.5 | 2/27/2011 15:25:01 | 25.625 |
| 7/2/2010 09:43:00 | 23.5 | 2/27/2011 16:01:01 | 25.625 |
| 7/2/2010 10:18:00 | 23.5 | 2/27/2011 16:37:01 | 25.625 |
| 7/2/2010 10:53:00 | 23.5 | 2/27/2011 17:13:01 | 25.625 |
| 7/2/2010 11:28:00 | 23.5 | 2/27/2011 17:49:01 | 25.625 |
| 7/2/2010 12:03:00 | 23.5 | 2/27/2011 18:25:01 | 25.625 |
| 7/2/2010 12:38:00 | 23.5 | 2/27/2011 19:01:01 | 25.625 |
| 7/2/2010 13:13:00 | 23.5 | 2/27/2011 19:37:01 | 25.625 |
| 7/2/2010 13:48:00 | 23.5 | 2/27/2011 20:13:01 | 25.625 |
| 7/2/2010 14:23:00 | 23.5 | 2/27/2011 20:49:01 | 25.625 |
| 7/2/2010 14:58:00 | 23.5 | 2/27/2011 21:25:01 | 25.625 |
| 7/2/2010 15:33:00 | 23.5 | 2/27/2011 22:01:01 | 25.625 |
| 7/2/2010 16:08:00 | 23.5 | 2/27/2011 22:37:01 | 25.625 |
| 7/2/2010 16:43:00 | 23.5 | 2/27/2011 23:13:01 | 25.625 |
| 7/2/2010 17:18:00 | 23.5 | 2/27/2011 23:49:01 | 25.625 |
| 7/2/2010 17:53:00 | 23.5 | 2/28/2011 00:25:01 | 25.625 |
| 7/2/2010 18:28:00 | 23.5 | 2/28/2011 01:01:01 | 25.625 |
| 7/2/2010 19:03:00 | 23.5 | 2/28/2011 01:37:01 | 25.625 |
| 7/2/2010 19:38:00 | 23.5 | 2/28/2011 02:13:01 | 25.625 |
| 7/2/2010 20:13:00 | 23.5 | 2/28/2011 02:49:01 | 25.625 |
| 7/2/2010 20:48:00 | 23.5 | 2/28/2011 03:25:01 | 25.625 |
| 7/2/2010 21:23:00 | 23.5 | 2/28/2011 04:01:01 | 25.625 |
| 7/2/2010 21:58:00 | 23.5 | 2/28/2011 04:37:01 | 25.625 |
| 7/2/2010 22:33:00 | 23.5 | 2/28/2011 05:13:01 | 25.625 |
| 7/2/2010 23:08:00 | 23.5 | 2/28/2011 05:49:01 | 25.625 |
| 7/2/2010 23:43:00 | 23.5 | 2/28/2011 06:25:01 | 25.625 |
| 7/3/2010 00:18:00 | 23.5 | 2/28/2011 07:01:01 | 25.625 |
| 7/3/2010 00:53:00 | 23.5 | 2/28/2011 07:37:01 | 25.625 |
| 7/3/2010 01:28:00 | 23.5 | 2/28/2011 08:13:01 | 25.625 |
| 7/3/2010 02:03:00 | 23.5 | 2/28/2011 08:49:01 | 25.625 |
| 7/3/2010 02:38:00 | 23.5 | 2/28/2011 09:25:01 | 25.625 |
| 7/3/2010 03:13:00 | 23.5 | 2/28/2011 10:01:01 | 25.625 |
| 7/3/2010 03:48:00 | 23.5 | 2/28/2011 10:37:01 | 25.625 |
| 7/3/2010 04:23:00 | 23.5 | 2/28/2011 11:13:01 | 25.625 |
| 7/3/2010 04:58:00 | 23.5 | 2/28/2011 11:49:01 | 25.625 |
| 7/3/2010 05:33:00 | 23.5 | 2/28/2011 12:25:01 | 25.625 |
| 7/3/2010 06:08:00 | 23.0 | 2/28/2011 13:01:01 | 25.625 |
| 7/3/2010 06:43:00 | 23.0 | 2/28/2011 13:37:01 | 25.625 |
| 7/3/2010 07:18:00 | 23.0 | 2/28/2011 14:13:01 | 25.625 |
| 7/3/2010 07:53:00 | 23.5 | 2/28/2011 14:49:01 | 25.625 |
| 7/3/2010 08:28:00 | 23.5 | 2/28/2011 15:25:01 | 25.625 |
| 7/3/2010 09:03:00 | 23.5 | 2/28/2011 16:01:01 | 25.625 |
| 7/3/2010 09:38:00 | 23.5 | 2/28/2011 16:37:01 | 25.625 |
| 7/3/2010 10:13:00 | 23.0 | 2/28/2011 17:13:01 | 25.625 |
| 7/3/2010 10:48:00 | 23.0 | 2/28/2011 17:49:01 | 25.625 |
| 7/3/2010 11:23:00 | 23.0 | 2/28/2011 18:25:01 | 25.625 |
| 7/3/2010 11:58:00 | 23.0 | 2/28/2011 19:01:01 | 25.625 |
| 7/3/2010 12:33:00 | 23.0 | 2/28/2011 19:37:01 | 25.625 |

|                   |      |                    |        |
|-------------------|------|--------------------|--------|
| 7/3/2010 13:08:00 | 23.0 | 2/28/2011 20:13:01 | 25.625 |
| 7/3/2010 13:43:00 | 23.0 | 2/28/2011 20:49:01 | 25.625 |
| 7/3/2010 14:18:00 | 23.0 | 2/28/2011 21:25:01 | 25.625 |
| 7/3/2010 14:53:00 | 23.0 | 2/28/2011 22:01:01 | 25.625 |
| 7/3/2010 15:28:00 | 23.0 | 2/28/2011 22:37:01 | 25.625 |
| 7/3/2010 16:03:00 | 23.0 | 2/28/2011 23:13:01 | 25.625 |
| 7/3/2010 16:38:00 | 23.0 | 2/28/2011 23:49:01 | 25.625 |
| 7/3/2010 17:13:00 | 23.5 | 3/1/2011 00:25:01  | 25.625 |
| 7/3/2010 17:48:00 | 23.5 | 3/1/2011 01:01:01  | 25.625 |
| 7/3/2010 18:23:00 | 23.5 | 3/1/2011 01:37:01  | 25.625 |
| 7/3/2010 18:58:00 | 23.5 | 3/1/2011 02:13:01  | 25.625 |
| 7/3/2010 19:33:00 | 23.5 | 3/1/2011 02:49:01  | 25.625 |
| 7/3/2010 20:08:00 | 23.5 | 3/1/2011 03:25:01  | 25.625 |
| 7/3/2010 20:43:00 | 23.5 | 3/1/2011 04:01:01  | 25.625 |
| 7/3/2010 21:18:00 | 23.5 | 3/1/2011 04:37:01  | 25.625 |
| 7/3/2010 21:53:00 | 23.5 | 3/1/2011 05:13:01  | 25.625 |
| 7/3/2010 22:28:00 | 23.5 | 3/1/2011 05:49:01  | 25.625 |
| 7/3/2010 23:03:00 | 23.5 | 3/1/2011 06:25:01  | 25.625 |
| 7/3/2010 23:38:00 | 23.5 | 3/1/2011 07:01:01  | 25.625 |
| 7/4/2010 00:13:00 | 23.5 | 3/1/2011 07:37:01  | 25.625 |
| 7/4/2010 00:48:00 | 23.5 | 3/1/2011 08:13:01  | 25.625 |
| 7/4/2010 01:23:00 | 23.5 | 3/1/2011 08:49:01  | 25.625 |
| 7/4/2010 01:58:00 | 23.5 | 3/1/2011 09:25:01  | 25.625 |
| 7/4/2010 02:33:00 | 23.5 | 3/1/2011 10:01:01  | 25.625 |
| 7/4/2010 03:08:00 | 23.5 | 3/1/2011 10:37:01  | 25.625 |
| 7/4/2010 03:43:00 | 23.5 | 3/1/2011 11:13:01  | 25.625 |
| 7/4/2010 04:18:00 | 23.5 | 3/1/2011 11:49:01  | 25.625 |
| 7/4/2010 04:53:00 | 23.5 | 3/1/2011 12:25:01  | 25.625 |
| 7/4/2010 05:28:00 | 23.5 | 3/1/2011 13:01:01  | 25.625 |
| 7/4/2010 06:03:00 | 23.5 | 3/1/2011 13:37:01  | 25.625 |
| 7/4/2010 06:38:00 | 23.0 | 3/1/2011 14:13:01  | 25.625 |
| 7/4/2010 07:13:00 | 23.0 | 3/1/2011 14:49:01  | 25.625 |
| 7/4/2010 07:48:00 | 23.0 | 3/1/2011 15:25:01  | 25.625 |
| 7/4/2010 08:23:00 | 23.0 | 3/1/2011 16:01:01  | 25.625 |
| 7/4/2010 08:58:00 | 23.0 | 3/1/2011 16:37:01  | 25.625 |
| 7/4/2010 09:33:00 | 23.0 | 3/1/2011 17:13:01  | 25.625 |
| 7/4/2010 10:08:00 | 23.0 | 3/1/2011 17:49:01  | 25.625 |
| 7/4/2010 10:43:00 | 23.0 | 3/1/2011 18:25:01  | 25.625 |
| 7/4/2010 11:18:00 | 23.0 | 3/1/2011 19:01:01  | 25.625 |
| 7/4/2010 11:53:00 | 23.0 | 3/1/2011 19:37:01  | 25.625 |
| 7/4/2010 12:28:00 | 23.0 | 3/1/2011 20:13:01  | 25.625 |
| 7/4/2010 13:03:00 | 23.0 | 3/1/2011 20:49:01  | 25.625 |
| 7/4/2010 13:38:00 | 23.0 | 3/1/2011 21:25:01  | 25.625 |
| 7/4/2010 14:13:00 | 23.0 | 3/1/2011 22:01:01  | 25.625 |
| 7/4/2010 14:48:00 | 23.0 | 3/1/2011 22:37:01  | 25.625 |
| 7/4/2010 15:23:00 | 23.0 | 3/1/2011 23:13:01  | 25.625 |
| 7/4/2010 15:58:00 | 23.0 | 3/1/2011 23:49:01  | 25.625 |
| 7/4/2010 16:33:00 | 23.0 | 3/2/2011 00:25:01  | 25.625 |
| 7/4/2010 17:08:00 | 23.0 | 3/2/2011 01:01:01  | 25.625 |
| 7/4/2010 17:43:00 | 23.0 | 3/2/2011 01:37:01  | 25.625 |



|                   |      |                   |        |
|-------------------|------|-------------------|--------|
| 7/4/2010 18:18:00 | 23.0 | 3/2/2011 02:13:01 | 25.625 |
| 7/4/2010 18:53:00 | 23.0 | 3/2/2011 02:49:01 | 25.625 |
| 7/4/2010 19:28:00 | 23.5 | 3/2/2011 03:25:01 | 25.625 |
| 7/4/2010 20:03:00 | 23.5 | 3/2/2011 04:01:01 | 25.625 |
| 7/4/2010 20:38:00 | 23.5 | 3/2/2011 04:37:01 | 25.625 |
| 7/4/2010 21:13:00 | 23.5 | 3/2/2011 05:13:01 | 25.625 |
| 7/4/2010 21:48:00 | 23.5 | 3/2/2011 05:49:01 | 25.625 |
| 7/4/2010 22:23:00 | 23.5 | 3/2/2011 06:25:01 | 25.625 |
| 7/4/2010 22:58:00 | 23.5 | 3/2/2011 07:01:01 | 25.625 |
| 7/4/2010 23:33:00 | 23.5 | 3/2/2011 07:37:01 | 25.625 |
| 7/5/2010 00:08:00 | 23.0 | 3/2/2011 08:13:01 | 25.625 |
| 7/5/2010 00:43:00 | 23.0 | 3/2/2011 08:49:01 | 25.625 |
| 7/5/2010 01:18:00 | 23.0 | 3/2/2011 09:25:01 | 25.625 |
| 7/5/2010 01:53:00 | 23.0 | 3/2/2011 10:01:01 | 25.625 |
| 7/5/2010 02:28:00 | 23.0 | 3/2/2011 10:37:01 | 25.625 |
| 7/5/2010 03:03:00 | 23.0 | 3/2/2011 11:13:01 | 25.625 |
| 7/5/2010 03:38:00 | 23.0 | 3/2/2011 11:49:01 | 25.625 |
| 7/5/2010 04:13:00 | 23.0 | 3/2/2011 12:25:01 | 25.625 |
| 7/5/2010 04:48:00 | 23.0 | 3/2/2011 13:01:01 | 25.625 |
| 7/5/2010 05:23:00 | 23.0 | 3/2/2011 13:37:01 | 25.625 |
| 7/5/2010 05:58:00 | 23.0 | 3/2/2011 14:13:01 | 26.125 |
| 7/5/2010 06:33:00 | 23.0 | 3/2/2011 14:49:01 | 26.125 |
| 7/5/2010 07:08:00 | 23.0 | 3/2/2011 15:25:01 | 26.125 |
| 7/5/2010 07:43:00 | 23.0 | 3/2/2011 16:01:01 | 25.625 |
| 7/5/2010 08:18:00 | 23.0 | 3/2/2011 16:37:01 | 25.625 |
| 7/5/2010 08:53:00 | 23.0 | 3/2/2011 17:13:01 | 25.625 |
| 7/5/2010 09:28:00 | 23.0 | 3/2/2011 17:49:01 | 25.625 |
| 7/5/2010 10:03:00 | 23.0 | 3/2/2011 18:25:01 | 25.625 |
| 7/5/2010 10:38:00 | 23.0 | 3/2/2011 19:01:01 | 25.625 |
| 7/5/2010 11:13:00 | 23.0 | 3/2/2011 19:37:01 | 25.625 |
| 7/5/2010 11:48:00 | 23.0 | 3/2/2011 20:13:01 | 25.625 |
| 7/5/2010 12:23:00 | 23.0 | 3/2/2011 20:49:01 | 25.625 |
| 7/5/2010 12:58:00 | 23.0 | 3/2/2011 21:25:01 | 25.625 |
| 7/5/2010 13:33:00 | 23.0 | 3/2/2011 22:01:01 | 25.625 |
| 7/5/2010 14:08:00 | 23.0 | 3/2/2011 22:37:01 | 25.625 |
| 7/5/2010 14:43:00 | 23.0 | 3/2/2011 23:13:01 | 25.625 |
| 7/5/2010 15:18:00 | 23.0 | 3/2/2011 23:49:01 | 25.625 |
| 7/5/2010 15:53:00 | 23.0 | 3/3/2011 00:25:01 | 25.625 |
| 7/5/2010 16:28:00 | 23.0 | 3/3/2011 01:01:01 | 25.625 |
| 7/5/2010 17:03:00 | 23.0 | 3/3/2011 01:37:01 | 25.625 |
| 7/5/2010 17:38:00 | 23.0 | 3/3/2011 02:13:01 | 25.625 |
| 7/5/2010 18:13:00 | 23.0 | 3/3/2011 02:49:01 | 25.625 |
| 7/5/2010 18:48:00 | 23.0 | 3/3/2011 03:25:01 | 25.625 |
| 7/5/2010 19:23:00 | 23.0 | 3/3/2011 04:01:01 | 25.625 |
| 7/5/2010 19:58:00 | 23.0 | 3/3/2011 04:37:01 | 25.625 |
| 7/5/2010 20:33:00 | 23.0 | 3/3/2011 05:13:01 | 25.625 |
| 7/5/2010 21:08:00 | 23.0 | 3/3/2011 05:49:01 | 25.625 |
| 7/5/2010 21:43:00 | 23.0 | 3/3/2011 06:25:01 | 25.625 |
| 7/5/2010 22:18:00 | 23.0 | 3/3/2011 07:01:01 | 25.625 |
| 7/5/2010 22:53:00 | 23.0 | 3/3/2011 07:37:01 | 25.625 |

|                   |      |                   |        |
|-------------------|------|-------------------|--------|
| 7/5/2010 23:28:00 | 23.0 | 3/3/2011 08:13:01 | 25.625 |
| 7/6/2010 00:03:00 | 23.0 | 3/3/2011 08:49:01 | 25.625 |
| 7/6/2010 00:38:00 | 23.0 | 3/3/2011 09:25:01 | 25.625 |
| 7/6/2010 01:13:00 | 23.0 | 3/3/2011 10:01:01 | 25.625 |
| 7/6/2010 01:48:00 | 23.0 | 3/3/2011 10:37:01 | 25.625 |
| 7/6/2010 02:23:00 | 23.0 | 3/3/2011 11:13:01 | 25.625 |
| 7/6/2010 02:58:00 | 23.0 | 3/3/2011 11:49:01 | 25.625 |
| 7/6/2010 03:33:00 | 23.0 | 3/3/2011 12:25:01 | 25.625 |
| 7/6/2010 04:08:00 | 23.0 | 3/3/2011 13:01:01 | 25.625 |
| 7/6/2010 04:43:00 | 23.0 | 3/3/2011 13:37:01 | 25.625 |
| 7/6/2010 05:18:00 | 23.0 | 3/3/2011 14:13:01 | 25.625 |
| 7/6/2010 05:53:00 | 23.0 | 3/3/2011 14:49:01 | 25.625 |
| 7/6/2010 06:28:00 | 23.0 | 3/3/2011 15:25:01 | 25.625 |
| 7/6/2010 07:03:00 | 23.0 | 3/3/2011 16:01:01 | 25.625 |
| 7/6/2010 07:38:00 | 23.0 | 3/3/2011 16:37:01 | 25.625 |
| 7/6/2010 08:13:00 | 23.0 | 3/3/2011 17:13:01 | 25.625 |
| 7/6/2010 08:48:00 | 23.0 | 3/3/2011 17:49:01 | 25.625 |
| 7/6/2010 09:23:00 | 23.0 | 3/3/2011 18:25:01 | 25.625 |
| 7/6/2010 09:58:00 | 23.0 | 3/3/2011 19:01:01 | 25.625 |
| 7/6/2010 10:33:00 | 23.0 | 3/3/2011 19:37:01 | 25.625 |
| 7/6/2010 11:08:00 | 23.0 | 3/3/2011 20:13:01 | 25.625 |
| 7/6/2010 11:43:00 | 22.5 | 3/3/2011 20:49:01 | 25.625 |
| 7/6/2010 12:18:00 | 22.5 | 3/3/2011 21:25:01 | 25.625 |
| 7/6/2010 12:53:00 | 22.5 | 3/3/2011 22:01:01 | 25.625 |
| 7/6/2010 13:28:00 | 22.5 | 3/3/2011 22:37:01 | 25.625 |
| 7/6/2010 14:03:00 | 22.5 | 3/3/2011 23:13:01 | 25.625 |
| 7/6/2010 14:38:00 | 23.0 | 3/3/2011 23:49:01 | 25.625 |
| 7/6/2010 15:13:00 | 23.0 | 3/4/2011 00:25:01 | 25.625 |
| 7/6/2010 15:48:00 | 23.0 | 3/4/2011 01:01:01 | 25.625 |
| 7/6/2010 16:23:00 | 23.0 | 3/4/2011 01:37:01 | 25.625 |
| 7/6/2010 16:58:00 | 23.0 | 3/4/2011 02:13:01 | 25.625 |
| 7/6/2010 17:33:00 | 23.0 | 3/4/2011 02:49:01 | 25.625 |
| 7/6/2010 18:08:00 | 23.0 | 3/4/2011 03:25:01 | 25.625 |
| 7/6/2010 18:43:00 | 23.0 | 3/4/2011 04:01:01 | 25.625 |
| 7/6/2010 19:18:00 | 23.0 | 3/4/2011 04:37:01 | 25.625 |
| 7/6/2010 19:53:00 | 23.0 | 3/4/2011 05:13:01 | 25.625 |
| 7/6/2010 20:28:00 | 23.0 | 3/4/2011 05:49:01 | 25.625 |
| 7/6/2010 21:03:00 | 23.0 | 3/4/2011 06:25:01 | 25.625 |
| 7/6/2010 21:38:00 | 23.0 | 3/4/2011 07:01:01 | 25.625 |
| 7/6/2010 22:13:00 | 23.0 | 3/4/2011 07:37:01 | 25.625 |
| 7/6/2010 22:48:00 | 23.0 | 3/4/2011 08:13:01 | 25.625 |
| 7/6/2010 23:23:00 | 23.0 | 3/4/2011 08:49:01 | 25.625 |
| 7/6/2010 23:58:00 | 23.0 | 3/4/2011 09:25:01 | 25.625 |
| 7/7/2010 00:33:00 | 23.0 | 3/4/2011 10:01:01 | 25.625 |
| 7/7/2010 01:08:00 | 23.0 | 3/4/2011 10:37:01 | 25.625 |
| 7/7/2010 01:43:00 | 23.0 | 3/4/2011 11:13:01 | 25.625 |
| 7/7/2010 02:18:00 | 23.0 | 3/4/2011 11:49:01 | 25.625 |
| 7/7/2010 02:53:00 | 23.0 | 3/4/2011 12:25:01 | 25.625 |
| 7/7/2010 03:28:00 | 23.0 | 3/4/2011 13:01:01 | 25.625 |
| 7/7/2010 04:03:00 | 23.0 | 3/4/2011 13:37:01 | 25.625 |

|                   |      |                   |        |
|-------------------|------|-------------------|--------|
| 7/7/2010 04:38:00 | 23.0 | 3/4/2011 14:13:01 | 25.625 |
| 7/7/2010 05:13:00 | 23.0 | 3/4/2011 14:49:01 | 25.625 |
| 7/7/2010 05:48:00 | 23.0 | 3/4/2011 15:25:01 | 25.625 |
| 7/7/2010 06:23:00 | 23.0 | 3/4/2011 16:01:01 | 25.625 |
| 7/7/2010 06:58:00 | 23.0 | 3/4/2011 16:37:01 | 25.625 |
| 7/7/2010 07:33:00 | 23.0 | 3/4/2011 17:13:01 | 25.625 |
| 7/7/2010 08:08:00 | 23.0 | 3/4/2011 17:49:01 | 25.625 |
| 7/7/2010 08:43:00 | 23.0 | 3/4/2011 18:25:01 | 25.625 |
| 7/7/2010 09:18:00 | 23.0 | 3/4/2011 19:01:01 | 25.625 |
| 7/7/2010 09:53:00 | 23.0 | 3/4/2011 19:37:01 | 25.625 |
| 7/7/2010 10:28:00 | 23.0 | 3/4/2011 20:13:01 | 25.625 |
| 7/7/2010 11:03:00 | 23.0 | 3/4/2011 20:49:01 | 25.625 |
| 7/7/2010 11:38:00 | 23.0 | 3/4/2011 21:25:01 | 25.625 |
| 7/7/2010 12:13:00 | 23.0 | 3/4/2011 22:01:01 | 25.625 |
| 7/7/2010 12:48:00 | 23.0 | 3/4/2011 22:37:01 | 25.625 |
| 7/7/2010 13:23:00 | 23.0 | 3/4/2011 23:13:01 | 25.625 |
| 7/7/2010 13:58:00 | 23.0 | 3/4/2011 23:49:01 | 25.625 |
| 7/7/2010 14:33:00 | 23.0 | 3/5/2011 00:25:01 | 25.625 |
| 7/7/2010 15:08:00 | 23.0 | 3/5/2011 01:01:01 | 25.625 |
| 7/7/2010 15:43:00 | 23.0 | 3/5/2011 01:37:01 | 25.625 |
| 7/7/2010 16:18:00 | 23.0 | 3/5/2011 02:13:01 | 25.625 |
| 7/7/2010 16:53:00 | 23.0 | 3/5/2011 02:49:01 | 25.625 |
| 7/7/2010 17:28:00 | 23.0 | 3/5/2011 03:25:01 | 25.625 |
| 7/7/2010 18:03:00 | 23.0 | 3/5/2011 04:01:01 | 25.625 |
| 7/7/2010 18:38:00 | 23.0 | 3/5/2011 04:37:01 | 25.625 |
| 7/7/2010 19:13:00 | 23.0 | 3/5/2011 05:13:01 | 25.625 |
| 7/7/2010 19:48:00 | 23.0 | 3/5/2011 05:49:01 | 25.625 |
| 7/7/2010 20:23:00 | 23.0 | 3/5/2011 06:25:01 | 25.625 |
| 7/7/2010 20:58:00 | 23.0 | 3/5/2011 07:01:01 | 25.625 |
| 7/7/2010 21:33:00 | 23.0 | 3/5/2011 07:37:01 | 25.625 |
| 7/7/2010 22:08:00 | 23.0 | 3/5/2011 08:13:01 | 25.625 |
| 7/7/2010 22:43:00 | 23.0 | 3/5/2011 08:49:01 | 25.625 |
| 7/7/2010 23:18:00 | 23.0 | 3/5/2011 09:25:01 | 25.625 |
| 7/7/2010 23:53:00 | 23.0 | 3/5/2011 10:01:01 | 25.625 |
| 7/8/2010 00:28:00 | 23.0 | 3/5/2011 10:37:01 | 25.625 |
| 7/8/2010 01:03:00 | 23.0 | 3/5/2011 11:13:01 | 25.625 |
| 7/8/2010 01:38:00 | 23.0 | 3/5/2011 11:49:01 | 25.625 |
| 7/8/2010 02:13:00 | 23.0 | 3/5/2011 12:25:01 | 25.625 |
| 7/8/2010 02:48:00 | 23.0 | 3/5/2011 13:01:01 | 25.625 |
| 7/8/2010 03:23:00 | 23.0 | 3/5/2011 13:37:01 | 25.625 |
| 7/8/2010 03:58:00 | 23.0 | 3/5/2011 14:13:01 | 25.625 |
| 7/8/2010 04:33:00 | 23.0 | 3/5/2011 14:49:01 | 25.625 |
| 7/8/2010 05:08:00 | 23.0 | 3/5/2011 15:25:01 | 25.625 |
| 7/8/2010 05:43:00 | 23.0 | 3/5/2011 16:01:01 | 25.625 |
| 7/8/2010 06:18:00 | 23.0 | 3/5/2011 16:37:01 | 25.625 |
| 7/8/2010 06:53:00 | 23.0 | 3/5/2011 17:13:01 | 25.625 |
| 7/8/2010 07:28:00 | 23.0 | 3/5/2011 17:49:01 | 25.625 |
| 7/8/2010 08:03:00 | 23.0 | 3/5/2011 18:25:01 | 25.625 |
| 7/8/2010 08:38:00 | 23.0 | 3/5/2011 19:01:01 | 25.625 |
| 7/8/2010 09:13:00 | 23.0 | 3/5/2011 19:37:01 | 25.625 |

|                   |      |                   |        |
|-------------------|------|-------------------|--------|
| 7/8/2010 09:48:00 | 23.0 | 3/5/2011 20:13:01 | 25.625 |
| 7/8/2010 10:23:00 | 23.0 | 3/5/2011 20:49:01 | 25.625 |
| 7/8/2010 10:58:00 | 23.0 | 3/5/2011 21:25:01 | 25.625 |
| 7/8/2010 11:33:00 | 23.0 | 3/5/2011 22:01:01 | 25.625 |
| 7/8/2010 12:08:00 | 23.0 | 3/5/2011 22:37:01 | 25.625 |
| 7/8/2010 12:43:00 | 23.0 | 3/5/2011 23:13:01 | 25.625 |
| 7/8/2010 13:18:00 | 23.0 | 3/5/2011 23:49:01 | 25.625 |
| 7/8/2010 13:53:00 | 23.0 | 3/6/2011 00:25:01 | 25.625 |
| 7/8/2010 14:28:00 | 23.0 | 3/6/2011 01:01:01 | 25.625 |
| 7/8/2010 15:03:00 | 23.0 | 3/6/2011 01:37:01 | 25.625 |
| 7/8/2010 15:38:00 | 23.0 | 3/6/2011 02:13:01 | 25.625 |
| 7/8/2010 16:13:00 | 23.0 | 3/6/2011 02:49:01 | 25.625 |
| 7/8/2010 16:48:00 | 23.0 | 3/6/2011 03:25:01 | 25.625 |
| 7/8/2010 17:23:00 | 23.0 | 3/6/2011 04:01:01 | 25.625 |
| 7/8/2010 17:58:00 | 23.0 | 3/6/2011 04:37:01 | 25.625 |
| 7/8/2010 18:33:00 | 23.0 | 3/6/2011 05:13:01 | 25.625 |
| 7/8/2010 19:08:00 | 23.0 | 3/6/2011 05:49:01 | 25.625 |
| 7/8/2010 19:43:00 | 23.0 | 3/6/2011 06:25:01 | 25.625 |
| 7/8/2010 20:18:00 | 23.0 | 3/6/2011 07:01:01 | 25.625 |
| 7/8/2010 20:53:00 | 23.0 | 3/6/2011 07:37:01 | 25.625 |
| 7/8/2010 21:28:00 | 23.0 | 3/6/2011 08:13:01 | 25.625 |
| 7/8/2010 22:03:00 | 23.0 | 3/6/2011 08:49:01 | 25.625 |
| 7/8/2010 22:38:00 | 23.0 | 3/6/2011 09:25:01 | 25.625 |
| 7/8/2010 23:13:00 | 23.0 | 3/6/2011 10:01:01 | 25.625 |
| 7/8/2010 23:48:00 | 23.0 | 3/6/2011 10:37:01 | 25.625 |
| 7/9/2010 00:23:00 | 23.0 | 3/6/2011 11:13:01 | 25.625 |
| 7/9/2010 00:58:00 | 23.0 | 3/6/2011 11:49:01 | 25.625 |
| 7/9/2010 01:33:00 | 23.0 | 3/6/2011 12:25:01 | 25.625 |
| 7/9/2010 02:08:00 | 23.0 | 3/6/2011 13:01:01 | 25.625 |
| 7/9/2010 02:43:00 | 23.0 | 3/6/2011 13:37:01 | 25.625 |
| 7/9/2010 03:18:00 | 23.0 | 3/6/2011 14:13:01 | 25.625 |
| 7/9/2010 03:53:00 | 23.0 | 3/6/2011 14:49:01 | 25.625 |
| 7/9/2010 04:28:00 | 23.0 | 3/6/2011 15:25:01 | 25.625 |
| 7/9/2010 05:03:00 | 23.0 | 3/6/2011 16:01:01 | 25.625 |
| 7/9/2010 05:38:00 | 23.0 | 3/6/2011 16:37:01 | 25.625 |
| 7/9/2010 06:13:00 | 23.0 | 3/6/2011 17:13:01 | 25.625 |
| 7/9/2010 06:48:00 | 23.0 | 3/6/2011 17:49:01 | 25.625 |
| 7/9/2010 07:23:00 | 23.0 | 3/6/2011 18:25:01 | 25.625 |
| 7/9/2010 07:58:00 | 23.0 | 3/6/2011 19:01:01 | 25.625 |
| 7/9/2010 08:33:00 | 23.0 | 3/6/2011 19:37:01 | 25.625 |
| 7/9/2010 09:08:00 | 23.0 | 3/6/2011 20:13:01 | 25.625 |
| 7/9/2010 09:43:00 | 23.0 | 3/6/2011 20:49:01 | 25.625 |
| 7/9/2010 10:18:00 | 23.0 | 3/6/2011 21:25:01 | 25.625 |
| 7/9/2010 10:53:00 | 23.0 | 3/6/2011 22:01:01 | 25.625 |
| 7/9/2010 11:28:00 | 23.0 | 3/6/2011 22:37:01 | 25.625 |
| 7/9/2010 12:03:00 | 23.0 | 3/6/2011 23:13:01 | 25.625 |
| 7/9/2010 12:38:00 | 23.0 | 3/6/2011 23:49:01 | 25.625 |
| 7/9/2010 13:13:00 | 23.0 | 3/7/2011 00:25:01 | 25.625 |
| 7/9/2010 13:48:00 | 23.0 | 3/7/2011 01:01:01 | 25.625 |
| 7/9/2010 14:23:00 | 23.0 | 3/7/2011 01:37:01 | 25.625 |

|                    |      |                   |        |
|--------------------|------|-------------------|--------|
| 7/9/2010 14:58:00  | 23.0 | 3/7/2011 02:13:01 | 25.625 |
| 7/9/2010 15:33:00  | 23.0 | 3/7/2011 02:49:01 | 25.625 |
| 7/9/2010 16:08:00  | 23.0 | 3/7/2011 03:25:01 | 25.625 |
| 7/9/2010 16:43:00  | 23.0 | 3/7/2011 04:01:01 | 25.625 |
| 7/9/2010 17:18:00  | 23.0 | 3/7/2011 04:37:01 | 25.625 |
| 7/9/2010 17:53:00  | 23.0 | 3/7/2011 05:13:01 | 25.625 |
| 7/9/2010 18:28:00  | 23.0 | 3/7/2011 05:49:01 | 25.625 |
| 7/9/2010 19:03:00  | 23.0 | 3/7/2011 06:25:01 | 25.625 |
| 7/9/2010 19:38:00  | 23.0 | 3/7/2011 07:01:01 | 25.625 |
| 7/9/2010 20:13:00  | 23.0 | 3/7/2011 07:37:01 | 25.625 |
| 7/9/2010 20:48:00  | 23.0 | 3/7/2011 08:13:01 | 25.625 |
| 7/9/2010 21:23:00  | 23.0 | 3/7/2011 08:49:01 | 25.625 |
| 7/9/2010 21:58:00  | 23.0 | 3/7/2011 09:25:01 | 25.625 |
| 7/9/2010 22:33:00  | 23.0 | 3/7/2011 10:01:01 | 25.625 |
| 7/9/2010 23:08:00  | 23.0 | 3/7/2011 10:37:01 | 25.625 |
| 7/9/2010 23:43:00  | 23.0 | 3/7/2011 11:13:01 | 25.625 |
| 7/10/2010 00:18:00 | 23.0 | 3/7/2011 11:49:01 | 25.625 |
| 7/10/2010 00:53:00 | 23.0 | 3/7/2011 12:25:01 | 25.625 |
| 7/10/2010 01:28:00 | 23.0 | 3/7/2011 13:01:01 | 25.625 |
| 7/10/2010 02:03:00 | 23.0 | 3/7/2011 13:37:01 | 25.625 |
| 7/10/2010 02:38:00 | 23.0 | 3/7/2011 14:13:01 | 25.625 |
| 7/10/2010 03:13:00 | 23.0 | 3/7/2011 14:49:01 | 25.625 |
| 7/10/2010 03:48:00 | 23.0 | 3/7/2011 15:25:01 | 25.625 |
| 7/10/2010 04:23:00 | 23.0 | 3/7/2011 16:01:01 | 25.625 |
| 7/10/2010 04:58:00 | 23.0 | 3/7/2011 16:37:01 | 25.625 |
| 7/10/2010 05:33:00 | 23.0 | 3/7/2011 17:13:01 | 25.625 |
| 7/10/2010 06:08:00 | 23.0 | 3/7/2011 17:49:01 | 25.625 |
| 7/10/2010 06:43:00 | 23.0 | 3/7/2011 18:25:01 | 25.625 |
| 7/10/2010 07:18:00 | 23.0 | 3/7/2011 19:01:01 | 25.625 |
| 7/10/2010 07:53:00 | 23.0 | 3/7/2011 19:37:01 | 25.625 |
| 7/10/2010 08:28:00 | 23.0 | 3/7/2011 20:13:01 | 25.625 |
| 7/10/2010 09:03:00 | 23.0 | 3/7/2011 20:49:01 | 25.625 |
| 7/10/2010 09:38:00 | 23.0 | 3/7/2011 21:25:01 | 25.625 |
| 7/10/2010 10:13:00 | 23.0 | 3/7/2011 22:01:01 | 25.625 |
| 7/10/2010 10:48:00 | 23.0 | 3/7/2011 22:37:01 | 25.625 |
| 7/10/2010 11:23:00 | 23.0 | 3/7/2011 23:13:01 | 25.625 |
| 7/10/2010 11:58:00 | 23.0 | 3/7/2011 23:49:01 | 25.625 |
| 7/10/2010 12:33:00 | 23.0 | 3/8/2011 00:25:01 | 25.625 |
| 7/10/2010 13:08:00 | 23.0 | 3/8/2011 01:01:01 | 25.625 |
| 7/10/2010 13:43:00 | 23.0 | 3/8/2011 01:37:01 | 25.625 |
| 7/10/2010 14:18:00 | 23.0 | 3/8/2011 02:13:01 | 25.625 |
| 7/10/2010 14:53:00 | 23.0 | 3/8/2011 02:49:01 | 25.625 |
| 7/10/2010 15:28:00 | 23.0 | 3/8/2011 03:25:01 | 25.625 |
| 7/10/2010 16:03:00 | 23.0 | 3/8/2011 04:01:01 | 25.625 |
| 7/10/2010 16:38:00 | 23.0 | 3/8/2011 04:37:01 | 25.625 |
| 7/10/2010 17:13:00 | 23.0 | 3/8/2011 05:13:01 | 25.625 |
| 7/10/2010 17:48:00 | 23.0 | 3/8/2011 05:49:01 | 25.625 |
| 7/10/2010 18:23:00 | 23.0 | 3/8/2011 06:25:01 | 25.625 |
| 7/10/2010 18:58:00 | 23.0 | 3/8/2011 07:01:01 | 25.625 |
| 7/10/2010 19:33:00 | 23.0 | 3/8/2011 07:37:01 | 25.625 |

|                    |      |                   |        |
|--------------------|------|-------------------|--------|
| 7/10/2010 20:08:00 | 23.0 | 3/8/2011 08:13:01 | 25.625 |
| 7/10/2010 20:43:00 | 23.0 | 3/8/2011 08:49:01 | 25.625 |
| 7/10/2010 21:18:00 | 23.0 | 3/8/2011 09:25:01 | 25.625 |
| 7/10/2010 21:53:00 | 23.0 | 3/8/2011 10:01:01 | 25.625 |
| 7/10/2010 22:28:00 | 23.0 | 3/8/2011 10:37:01 | 25.625 |
| 7/10/2010 23:03:00 | 23.0 | 3/8/2011 11:13:01 | 25.625 |
| 7/10/2010 23:38:00 | 23.0 | 3/8/2011 11:49:01 | 25.625 |
| 7/11/2010 00:13:00 | 23.0 | 3/8/2011 12:25:01 | 25.625 |
| 7/11/2010 00:48:00 | 23.0 | 3/8/2011 13:01:01 | 25.625 |
| 7/11/2010 01:23:00 | 23.0 | 3/8/2011 13:37:01 | 25.625 |
| 7/11/2010 01:58:00 | 23.0 | 3/8/2011 14:13:01 | 25.625 |
| 7/11/2010 02:33:00 | 23.0 | 3/8/2011 14:49:01 | 25.625 |
| 7/11/2010 03:08:00 | 23.0 | 3/8/2011 15:25:01 | 26.125 |
| 7/11/2010 03:43:00 | 23.0 | 3/8/2011 16:01:01 | 26.125 |
| 7/11/2010 04:18:00 | 23.0 | 3/8/2011 16:37:01 | 26.125 |
| 7/11/2010 04:53:00 | 23.0 | 3/8/2011 17:13:01 | 25.625 |
| 7/11/2010 05:28:00 | 23.0 | 3/8/2011 17:49:01 | 25.625 |
| 7/11/2010 06:03:00 | 23.0 | 3/8/2011 18:25:01 | 25.625 |
| 7/11/2010 06:38:00 | 23.0 | 3/8/2011 19:01:01 | 25.625 |
| 7/11/2010 07:13:00 | 23.0 | 3/8/2011 19:37:01 | 25.625 |
| 7/11/2010 07:48:00 | 23.0 | 3/8/2011 20:13:01 | 25.625 |
| 7/11/2010 08:23:00 | 23.0 | 3/8/2011 20:49:01 | 25.625 |
| 7/11/2010 08:58:00 | 23.0 | 3/8/2011 21:25:01 | 25.625 |
| 7/11/2010 09:33:00 | 23.0 | 3/8/2011 22:01:01 | 25.625 |
| 7/11/2010 10:08:00 | 23.0 | 3/8/2011 22:37:01 | 25.625 |
| 7/11/2010 10:43:00 | 23.0 | 3/8/2011 23:13:01 | 25.625 |
| 7/11/2010 11:18:00 | 23.0 | 3/8/2011 23:49:01 | 25.625 |
| 7/11/2010 11:53:00 | 23.0 | 3/9/2011 00:25:01 | 25.625 |
| 7/11/2010 12:28:00 | 23.0 | 3/9/2011 01:01:01 | 25.625 |
| 7/11/2010 13:03:00 | 23.0 | 3/9/2011 01:37:01 | 25.625 |
| 7/11/2010 13:38:00 | 23.0 | 3/9/2011 02:13:01 | 25.625 |
| 7/11/2010 14:13:00 | 23.0 | 3/9/2011 02:49:01 | 25.625 |
| 7/11/2010 14:48:00 | 23.0 | 3/9/2011 03:25:01 | 25.625 |
| 7/11/2010 15:23:00 | 23.0 | 3/9/2011 04:01:01 | 25.625 |
| 7/11/2010 15:58:00 | 23.0 | 3/9/2011 04:37:01 | 25.625 |
| 7/11/2010 16:33:00 | 23.0 | 3/9/2011 05:13:01 | 25.625 |
| 7/11/2010 17:08:00 | 23.0 | 3/9/2011 05:49:01 | 25.625 |
| 7/11/2010 17:43:00 | 23.0 | 3/9/2011 06:25:01 | 25.625 |
| 7/11/2010 18:18:00 | 23.0 | 3/9/2011 07:01:01 | 25.625 |
| 7/11/2010 18:53:00 | 23.0 | 3/9/2011 07:37:01 | 25.625 |
| 7/11/2010 19:28:00 | 23.0 | 3/9/2011 08:13:01 | 25.625 |
| 7/11/2010 20:03:00 | 23.0 | 3/9/2011 08:49:01 | 25.625 |
| 7/11/2010 20:38:00 | 23.0 | 3/9/2011 09:25:01 | 25.625 |
| 7/11/2010 21:13:00 | 23.0 | 3/9/2011 10:01:01 | 25.625 |
| 7/11/2010 21:48:00 | 23.0 | 3/9/2011 10:37:01 | 25.625 |
| 7/11/2010 22:23:00 | 23.0 | 3/9/2011 11:13:01 | 25.625 |
| 7/11/2010 22:58:00 | 23.0 | 3/9/2011 11:49:01 | 25.625 |
| 7/11/2010 23:33:00 | 23.0 | 3/9/2011 12:25:01 | 25.625 |
| 7/12/2010 00:08:00 | 23.0 | 3/9/2011 13:01:01 | 25.625 |
| 7/12/2010 00:43:00 | 23.0 | 3/9/2011 13:37:01 | 25.625 |

|                    |      |                    |        |
|--------------------|------|--------------------|--------|
| 7/12/2010 01:18:00 | 23.0 | 3/9/2011 14:13:01  | 25.625 |
| 7/12/2010 01:53:00 | 23.0 | 3/9/2011 14:49:01  | 25.625 |
| 7/12/2010 02:28:00 | 23.0 | 3/9/2011 15:25:01  | 25.625 |
| 7/12/2010 03:03:00 | 23.0 | 3/9/2011 16:01:01  | 25.625 |
| 7/12/2010 03:38:00 | 23.0 | 3/9/2011 16:37:01  | 25.625 |
| 7/12/2010 04:13:00 | 23.0 | 3/9/2011 17:13:01  | 25.625 |
| 7/12/2010 04:48:00 | 23.0 | 3/9/2011 17:49:01  | 25.625 |
| 7/12/2010 05:23:00 | 23.0 | 3/9/2011 18:25:01  | 25.625 |
| 7/12/2010 05:58:00 | 23.0 | 3/9/2011 19:01:01  | 25.625 |
| 7/12/2010 06:33:00 | 23.0 | 3/9/2011 19:37:01  | 25.625 |
| 7/12/2010 07:08:00 | 23.0 | 3/9/2011 20:13:01  | 25.625 |
| 7/12/2010 07:43:00 | 23.0 | 3/9/2011 20:49:01  | 25.625 |
| 7/12/2010 08:18:00 | 23.0 | 3/9/2011 21:25:01  | 25.625 |
| 7/12/2010 08:53:00 | 23.0 | 3/9/2011 22:01:01  | 25.625 |
| 7/12/2010 09:28:00 | 23.0 | 3/9/2011 22:37:01  | 25.625 |
| 7/12/2010 10:03:00 | 23.0 | 3/9/2011 23:13:01  | 25.625 |
| 7/12/2010 10:38:00 | 23.0 | 3/9/2011 23:49:01  | 25.625 |
| 7/12/2010 11:13:00 | 23.0 | 3/10/2011 00:25:01 | 25.625 |
| 7/12/2010 11:48:00 | 23.0 | 3/10/2011 01:01:01 | 25.625 |
| 7/12/2010 12:23:00 | 23.0 | 3/10/2011 01:37:01 | 25.625 |
| 7/12/2010 12:58:00 | 23.0 | 3/10/2011 02:13:01 | 25.625 |
| 7/12/2010 13:33:00 | 23.0 | 3/10/2011 02:49:01 | 25.625 |
| 7/12/2010 14:08:00 | 23.0 | 3/10/2011 03:25:01 | 25.625 |
| 7/12/2010 14:43:00 | 23.0 | 3/10/2011 04:01:01 | 25.625 |
| 7/12/2010 15:18:00 | 23.0 | 3/10/2011 04:37:01 | 25.625 |
| 7/12/2010 15:53:00 | 23.0 | 3/10/2011 05:13:01 | 25.625 |
| 7/12/2010 16:28:00 | 23.0 | 3/10/2011 05:49:01 | 25.625 |
| 7/12/2010 17:03:00 | 23.0 | 3/10/2011 06:25:01 | 25.625 |
| 7/12/2010 17:38:00 | 23.0 | 3/10/2011 07:01:01 | 25.625 |
| 7/12/2010 18:13:00 | 23.0 | 3/10/2011 07:37:01 | 25.625 |
| 7/12/2010 18:48:00 | 23.0 | 3/10/2011 08:13:01 | 25.625 |
| 7/12/2010 19:23:00 | 23.0 | 3/10/2011 08:49:01 | 25.625 |
| 7/12/2010 19:58:00 | 23.0 | 3/10/2011 09:25:01 | 25.625 |
| 7/12/2010 20:33:00 | 23.0 | 3/10/2011 10:01:01 | 25.625 |
| 7/12/2010 21:08:00 | 23.0 | 3/10/2011 10:37:01 | 25.625 |
| 7/12/2010 21:43:00 | 23.0 | 3/10/2011 11:13:01 | 25.625 |
| 7/12/2010 22:18:00 | 23.0 | 3/10/2011 11:49:01 | 25.625 |
| 7/12/2010 22:53:00 | 23.0 | 3/10/2011 12:25:01 | 25.625 |
| 7/12/2010 23:28:00 | 23.0 | 3/10/2011 13:01:01 | 25.625 |
| 7/13/2010 00:03:00 | 23.0 | 3/10/2011 13:37:01 | 25.625 |
| 7/13/2010 00:38:00 | 23.0 | 3/10/2011 14:13:01 | 25.625 |
| 7/13/2010 01:13:00 | 23.0 | 3/10/2011 14:49:01 | 25.625 |
| 7/13/2010 01:48:00 | 23.0 | 3/10/2011 15:25:01 | 25.625 |
| 7/13/2010 02:23:00 | 23.0 | 3/10/2011 16:01:01 | 25.625 |
| 7/13/2010 02:58:00 | 23.0 | 3/10/2011 16:37:01 | 25.625 |
| 7/13/2010 03:33:00 | 23.0 | 3/10/2011 17:13:01 | 25.625 |
| 7/13/2010 04:08:00 | 23.0 | 3/10/2011 17:49:01 | 25.625 |
| 7/13/2010 04:43:00 | 23.0 | 3/10/2011 18:25:01 | 25.625 |
| 7/13/2010 05:18:00 | 23.0 | 3/10/2011 19:01:01 | 25.625 |
| 7/13/2010 05:53:00 | 23.0 | 3/10/2011 19:37:01 | 25.625 |

|                    |      |                    |        |
|--------------------|------|--------------------|--------|
| 7/13/2010 06:28:00 | 23.0 | 3/10/2011 20:13:01 | 25.625 |
| 7/13/2010 07:03:00 | 22.5 | 3/10/2011 20:49:01 | 25.625 |
| 7/13/2010 07:38:00 | 22.5 | 3/10/2011 21:25:01 | 25.625 |
| 7/13/2010 08:13:00 | 22.5 | 3/10/2011 22:01:01 | 25.625 |
| 7/13/2010 08:48:00 | 22.5 | 3/10/2011 22:37:01 | 25.625 |
| 7/13/2010 09:23:00 | 22.5 | 3/10/2011 23:13:01 | 25.625 |
| 7/13/2010 09:58:00 | 22.5 | 3/10/2011 23:49:01 | 25.625 |
| 7/13/2010 10:33:00 | 22.5 | 3/11/2011 00:25:01 | 25.625 |
| 7/13/2010 11:08:00 | 22.5 | 3/11/2011 01:01:01 | 25.625 |
| 7/13/2010 11:43:00 | 22.5 | 3/11/2011 01:37:01 | 25.625 |
| 7/13/2010 12:18:00 | 22.5 | 3/11/2011 02:13:01 | 25.625 |
| 7/13/2010 12:53:00 | 22.5 | 3/11/2011 02:49:01 | 25.625 |
| 7/13/2010 13:28:00 | 22.5 | 3/11/2011 03:25:01 | 25.625 |
| 7/13/2010 14:03:00 | 22.5 | 3/11/2011 04:01:01 | 25.625 |
| 7/13/2010 14:38:00 | 23.0 | 3/11/2011 04:37:01 | 25.625 |
| 7/13/2010 15:13:00 | 23.0 | 3/11/2011 05:13:01 | 25.625 |
| 7/13/2010 15:48:00 | 23.0 | 3/11/2011 05:49:01 | 25.625 |
| 7/13/2010 16:23:00 | 23.0 | 3/11/2011 06:25:01 | 25.126 |
| 7/13/2010 16:58:00 | 23.0 | 3/11/2011 07:01:01 | 25.625 |
| 7/13/2010 17:33:00 | 23.0 | 3/11/2011 07:37:01 | 25.625 |
| 7/13/2010 18:08:00 | 23.0 | 3/11/2011 08:13:01 | 25.625 |
| 7/13/2010 18:43:00 | 23.0 | 3/11/2011 08:49:01 | 25.625 |
| 7/13/2010 19:18:00 | 23.0 | 3/11/2011 09:25:01 | 25.625 |
| 7/13/2010 19:53:00 | 23.0 | 3/11/2011 10:01:01 | 25.625 |
| 7/13/2010 20:28:00 | 23.0 | 3/11/2011 10:37:01 | 25.625 |
| 7/13/2010 21:03:00 | 23.0 | 3/11/2011 11:13:01 | 25.126 |
| 7/13/2010 21:38:00 | 23.0 | 3/11/2011 11:49:01 | 25.126 |
| 7/13/2010 22:13:00 | 23.0 | 3/11/2011 12:25:01 | 25.126 |
| 7/13/2010 22:48:00 | 23.0 | 3/11/2011 13:01:01 | 25.126 |
| 7/13/2010 23:23:00 | 23.0 | 3/11/2011 13:37:01 | 25.126 |
| 7/13/2010 23:58:00 | 23.0 | 3/11/2011 14:13:01 | 25.126 |
| 7/14/2010 00:33:00 | 23.0 | 3/11/2011 14:49:01 | 25.126 |
| 7/14/2010 01:08:00 | 23.0 | 3/11/2011 15:25:01 | 25.126 |
| 7/14/2010 01:43:00 | 23.0 | 3/11/2011 16:01:01 | 25.126 |
| 7/14/2010 02:18:00 | 23.0 | 3/11/2011 16:37:01 | 25.126 |
| 7/14/2010 02:53:00 | 23.0 | 3/11/2011 17:13:01 | 25.625 |
| 7/14/2010 03:28:00 | 23.0 | 3/11/2011 17:49:01 | 25.625 |
| 7/14/2010 04:03:00 | 23.0 | 3/11/2011 18:25:01 | 25.126 |
| 7/14/2010 04:38:00 | 23.0 | 3/11/2011 19:01:01 | 25.126 |
| 7/14/2010 05:13:00 | 23.0 | 3/11/2011 19:37:01 | 25.625 |
| 7/14/2010 05:48:00 | 23.0 | 3/11/2011 20:13:01 | 25.126 |
| 7/14/2010 06:23:00 | 23.0 | 3/11/2011 20:49:01 | 25.625 |
| 7/14/2010 06:58:00 | 23.0 | 3/11/2011 21:25:01 | 25.625 |
| 7/14/2010 07:33:00 | 23.0 | 3/11/2011 22:01:01 | 25.625 |
| 7/14/2010 08:08:00 | 23.0 | 3/11/2011 22:37:01 | 25.625 |
| 7/14/2010 08:43:00 | 23.0 | 3/11/2011 23:13:01 | 25.625 |
| 7/14/2010 09:18:00 | 23.0 | 3/11/2011 23:49:01 | 25.625 |
| 7/14/2010 09:53:00 | 23.0 | 3/12/2011 00:25:01 | 25.625 |
| 7/14/2010 10:28:00 | 23.0 | 3/12/2011 01:01:01 | 25.625 |
| 7/14/2010 11:03:00 | 23.0 | 3/12/2011 01:37:01 | 25.625 |



|                    |      |                    |        |
|--------------------|------|--------------------|--------|
| 7/14/2010 11:38:00 | 23.0 | 3/12/2011 02:13:01 | 25.625 |
| 7/14/2010 12:13:00 | 23.0 | 3/12/2011 02:49:01 | 26.125 |
| 7/14/2010 12:48:00 | 23.0 | 3/12/2011 03:25:01 | 26.125 |
| 7/14/2010 13:23:00 | 23.0 | 3/12/2011 04:01:01 | 26.125 |
| 7/14/2010 13:58:00 | 23.0 | 3/12/2011 04:37:01 | 25.625 |
| 7/14/2010 14:33:00 | 23.0 | 3/12/2011 05:13:01 | 25.625 |
| 7/14/2010 15:08:00 | 23.0 | 3/12/2011 05:49:01 | 25.625 |
| 7/14/2010 15:43:00 | 23.0 | 3/12/2011 06:25:01 | 25.625 |
| 7/14/2010 16:18:00 | 23.0 | 3/12/2011 07:01:01 | 25.625 |
| 7/14/2010 16:53:00 | 23.0 | 3/12/2011 07:37:01 | 25.625 |
| 7/14/2010 17:28:00 | 23.0 | 3/12/2011 08:13:01 | 25.625 |
| 7/14/2010 18:03:00 | 23.0 | 3/12/2011 08:49:01 | 25.625 |
| 7/14/2010 18:38:00 | 23.0 | 3/12/2011 09:25:01 | 25.625 |
| 7/14/2010 19:13:00 | 23.0 | 3/12/2011 10:01:01 | 25.625 |
| 7/14/2010 19:48:00 | 23.0 | 3/12/2011 10:37:01 | 25.625 |
| 7/14/2010 20:23:00 | 23.0 | 3/12/2011 11:13:01 | 25.625 |
| 7/14/2010 20:58:00 | 23.0 | 3/12/2011 11:49:01 | 25.625 |
| 7/14/2010 21:33:00 | 23.0 | 3/12/2011 12:25:01 | 25.126 |
| 7/14/2010 22:08:00 | 23.0 | 3/12/2011 13:01:01 | 25.126 |
| 7/14/2010 22:43:00 | 23.0 | 3/12/2011 13:37:01 | 25.126 |
| 7/14/2010 23:18:00 | 23.0 | 3/12/2011 14:13:01 | 25.126 |
| 7/14/2010 23:53:00 | 23.0 | 3/12/2011 14:49:01 | 25.126 |
| 7/15/2010 00:28:00 | 23.0 | 3/12/2011 15:25:01 | 25.625 |
| 7/15/2010 01:03:00 | 23.0 | 3/12/2011 16:01:01 | 25.126 |
| 7/15/2010 01:38:00 | 23.0 | 3/12/2011 16:37:01 | 25.625 |
| 7/15/2010 02:13:00 | 23.0 | 3/12/2011 17:13:01 | 25.625 |
| 7/15/2010 02:48:00 | 23.0 | 3/12/2011 17:49:01 | 25.625 |
| 7/15/2010 03:23:00 | 23.0 | 3/12/2011 18:25:01 | 25.625 |
| 7/15/2010 03:58:00 | 23.0 | 3/12/2011 19:01:01 | 25.625 |
| 7/15/2010 04:33:00 | 23.0 | 3/12/2011 19:37:01 | 25.625 |
| 7/15/2010 05:08:00 | 23.0 | 3/12/2011 20:13:01 | 25.625 |
| 7/15/2010 05:43:00 | 23.0 | 3/12/2011 20:49:01 | 25.625 |
| 7/15/2010 06:18:00 | 23.0 | 3/12/2011 21:25:01 | 25.625 |
| 7/15/2010 06:53:00 | 23.0 | 3/12/2011 22:01:01 | 25.625 |
| 7/15/2010 07:28:00 | 23.0 | 3/12/2011 22:37:01 | 25.625 |
| 7/15/2010 08:03:00 | 23.0 | 3/12/2011 23:13:01 | 25.625 |
| 7/15/2010 08:38:00 | 23.0 | 3/12/2011 23:49:01 | 25.625 |
| 7/15/2010 09:13:00 | 23.0 | 3/13/2011 00:25:01 | 25.625 |
| 7/15/2010 09:48:00 | 23.0 | 3/13/2011 01:01:01 | 25.625 |
| 7/15/2010 10:23:00 | 22.5 | 3/13/2011 01:37:01 | 25.625 |
| 7/15/2010 10:58:00 | 22.5 | 3/13/2011 02:13:01 | 25.625 |
| 7/15/2010 11:33:00 | 22.5 | 3/13/2011 02:49:01 | 25.625 |
| 7/15/2010 12:08:00 | 22.5 | 3/13/2011 03:25:01 | 25.126 |
| 7/15/2010 12:43:00 | 22.5 | 3/13/2011 04:01:01 | 25.126 |
| 7/15/2010 13:18:00 | 22.5 | 3/13/2011 04:37:01 | 25.126 |
| 7/15/2010 13:53:00 | 22.5 | 3/13/2011 05:13:01 | 25.126 |
| 7/15/2010 14:28:00 | 22.5 | 3/13/2011 05:49:01 | 25.126 |
| 7/15/2010 15:03:00 | 22.5 | 3/13/2011 06:25:01 | 25.126 |
| 7/15/2010 15:38:00 | 23.0 | 3/13/2011 07:01:01 | 25.126 |
| 7/15/2010 16:13:00 | 23.0 | 3/13/2011 07:37:01 | 25.625 |

|                    |      |                    |        |
|--------------------|------|--------------------|--------|
| 7/15/2010 16:48:00 | 23.0 | 3/13/2011 08:13:01 | 25.625 |
| 7/15/2010 17:23:00 | 23.0 | 3/13/2011 08:49:01 | 25.625 |
| 7/15/2010 17:58:00 | 23.0 | 3/13/2011 09:25:01 | 25.625 |
| 7/15/2010 18:33:00 | 23.0 | 3/13/2011 10:01:01 | 25.625 |
| 7/15/2010 19:08:00 | 23.0 | 3/13/2011 10:37:01 | 25.625 |
| 7/15/2010 19:43:00 | 23.0 | 3/13/2011 11:13:01 | 25.625 |
| 7/15/2010 20:18:00 | 23.0 | 3/13/2011 11:49:01 | 25.625 |
| 7/15/2010 20:53:00 | 23.0 | 3/13/2011 12:25:01 | 25.625 |
| 7/15/2010 21:28:00 | 23.0 | 3/13/2011 13:01:01 | 25.126 |
| 7/15/2010 22:03:00 | 23.0 | 3/13/2011 13:37:01 | 25.126 |
| 7/15/2010 22:38:00 | 23.0 | 3/13/2011 14:13:01 | 25.126 |
| 7/15/2010 23:13:00 | 23.0 | 3/13/2011 14:49:01 | 25.126 |
| 7/15/2010 23:48:00 | 23.0 | 3/13/2011 15:25:01 | 25.126 |
| 7/16/2010 00:23:00 | 23.0 | 3/13/2011 16:01:01 | 25.126 |
| 7/16/2010 00:58:00 | 23.0 | 3/13/2011 16:37:01 | 25.126 |
| 7/16/2010 01:33:00 | 23.0 | 3/13/2011 17:13:01 | 25.625 |
| 7/16/2010 02:08:00 | 23.0 | 3/13/2011 17:49:01 | 25.625 |
| 7/16/2010 02:43:00 | 23.0 | 3/13/2011 18:25:01 | 26.125 |
| 7/16/2010 03:18:00 | 23.0 | 3/13/2011 19:01:01 | 25.625 |
| 7/16/2010 03:53:00 | 23.0 | 3/13/2011 19:37:01 | 25.625 |
| 7/16/2010 04:28:00 | 23.0 | 3/13/2011 20:13:01 | 25.625 |
| 7/16/2010 05:03:00 | 23.0 | 3/13/2011 20:49:01 | 25.625 |
| 7/16/2010 05:38:00 | 22.5 | 3/13/2011 21:25:01 | 25.625 |
| 7/16/2010 06:13:00 | 22.5 | 3/13/2011 22:01:01 | 25.625 |
| 7/16/2010 06:48:00 | 22.5 | 3/13/2011 22:37:01 | 25.625 |
| 7/16/2010 07:23:00 | 22.5 | 3/13/2011 23:13:01 | 25.625 |
| 7/16/2010 07:58:00 | 22.5 | 3/13/2011 23:49:01 | 25.625 |
| 7/16/2010 08:33:00 | 22.5 | 3/14/2011 00:25:01 | 25.625 |
| 7/16/2010 09:08:00 | 22.5 | 3/14/2011 01:01:01 | 25.625 |
| 7/16/2010 09:43:00 | 22.5 | 3/14/2011 01:37:01 | 25.625 |
| 7/16/2010 10:18:00 | 22.5 | 3/14/2011 02:13:01 | 25.625 |
| 7/16/2010 10:53:00 | 22.5 | 3/14/2011 02:49:01 | 25.625 |
| 7/16/2010 11:28:00 | 22.5 | 3/14/2011 03:25:01 | 25.625 |
| 7/16/2010 12:03:00 | 22.5 | 3/14/2011 04:01:01 | 25.625 |
| 7/16/2010 12:38:00 | 22.5 | 3/14/2011 04:37:01 | 25.625 |
| 7/16/2010 13:13:00 | 22.5 | 3/14/2011 05:13:01 | 25.625 |
| 7/16/2010 13:48:00 | 22.5 | 3/14/2011 05:49:01 | 25.625 |
| 7/16/2010 14:23:00 | 22.5 | 3/14/2011 06:25:01 | 25.625 |
| 7/16/2010 14:58:00 | 22.5 | 3/14/2011 07:01:01 | 25.126 |
| 7/16/2010 15:33:00 | 22.5 | 3/14/2011 07:37:01 | 25.126 |
| 7/16/2010 16:08:00 | 22.5 | 3/14/2011 08:13:01 | 25.126 |
| 7/16/2010 16:43:00 | 23.0 | 3/14/2011 08:49:01 | 25.126 |
| 7/16/2010 17:18:00 | 23.0 | 3/14/2011 09:25:01 | 25.126 |
| 7/16/2010 17:53:00 | 23.0 | 3/14/2011 10:01:01 | 25.625 |
| 7/16/2010 18:28:00 | 23.0 | 3/14/2011 10:37:01 | 25.625 |
| 7/16/2010 19:03:00 | 23.0 | 3/14/2011 11:13:01 | 25.625 |
| 7/16/2010 19:38:00 | 23.0 | 3/14/2011 11:49:01 | 25.625 |
| 7/16/2010 20:13:00 | 23.0 | 3/14/2011 12:25:01 | 25.625 |
| 7/16/2010 20:48:00 | 23.0 | 3/14/2011 13:01:01 | 25.625 |
| 7/16/2010 21:23:00 | 23.0 | 3/14/2011 13:37:01 | 25.625 |

|                    |      |                    |        |
|--------------------|------|--------------------|--------|
| 7/16/2010 21:58:00 | 23.0 | 3/14/2011 14:13:01 | 25.126 |
| 7/16/2010 22:33:00 | 23.0 | 3/14/2011 14:49:01 | 25.126 |
| 7/16/2010 23:08:00 | 23.0 | 3/14/2011 15:25:01 | 25.126 |
| 7/16/2010 23:43:00 | 23.0 | 3/14/2011 16:01:01 | 25.126 |
| 7/17/2010 00:18:00 | 23.0 | 3/14/2011 16:37:01 | 25.126 |
| 7/17/2010 00:53:00 | 23.0 | 3/14/2011 17:13:01 | 25.126 |
| 7/17/2010 01:28:00 | 23.0 | 3/14/2011 17:49:01 | 25.126 |
| 7/17/2010 02:03:00 | 23.0 | 3/14/2011 18:25:01 | 25.126 |
| 7/17/2010 02:38:00 | 23.0 | 3/14/2011 19:01:01 | 25.126 |
| 7/17/2010 03:13:00 | 23.0 | 3/14/2011 19:37:01 | 25.126 |
| 7/17/2010 03:48:00 | 23.0 | 3/14/2011 20:13:01 | 25.126 |
| 7/17/2010 04:23:00 | 23.0 | 3/14/2011 20:49:01 | 25.126 |
| 7/17/2010 04:58:00 | 23.0 | 3/14/2011 21:25:01 | 25.126 |
| 7/17/2010 05:33:00 | 23.0 | 3/14/2011 22:01:01 | 25.126 |
| 7/17/2010 06:08:00 | 23.0 | 3/14/2011 22:37:01 | 25.126 |
| 7/17/2010 06:43:00 | 23.0 | 3/14/2011 23:13:01 | 25.126 |
| 7/17/2010 07:18:00 | 23.0 | 3/14/2011 23:49:01 | 25.126 |
| 7/17/2010 07:53:00 | 23.0 | 3/15/2011 00:25:01 | 25.126 |
| 7/17/2010 08:28:00 | 23.0 | 3/15/2011 01:01:01 | 25.625 |
| 7/17/2010 09:03:00 | 23.0 | 3/15/2011 01:37:01 | 25.625 |
| 7/17/2010 09:38:00 | 23.0 | 3/15/2011 02:13:01 | 25.625 |
| 7/17/2010 10:13:00 | 23.0 | 3/15/2011 02:49:01 | 25.625 |
| 7/17/2010 10:48:00 | 23.0 | 3/15/2011 03:25:01 | 25.625 |
| 7/17/2010 11:23:00 | 23.0 | 3/15/2011 04:01:01 | 25.625 |
| 7/17/2010 11:58:00 | 23.0 | 3/15/2011 04:37:01 | 25.625 |
| 7/17/2010 12:33:00 | 23.0 | 3/15/2011 05:13:01 | 25.625 |
| 7/17/2010 13:08:00 | 23.0 | 3/15/2011 05:49:01 | 25.625 |
| 7/17/2010 13:43:00 | 23.0 | 3/15/2011 06:25:01 | 25.625 |
| 7/17/2010 14:18:00 | 23.0 | 3/15/2011 07:01:01 | 25.625 |
| 7/17/2010 14:53:00 | 23.0 | 3/15/2011 07:37:01 | 25.625 |
| 7/17/2010 15:28:00 | 23.0 | 3/15/2011 08:13:01 | 25.625 |
| 7/17/2010 16:03:00 | 23.0 | 3/15/2011 08:49:01 | 25.625 |
| 7/17/2010 16:38:00 | 23.0 | 3/15/2011 09:25:01 | 25.625 |
| 7/17/2010 17:13:00 | 23.0 | 3/15/2011 10:01:01 | 25.625 |
| 7/17/2010 17:48:00 | 23.0 | 3/15/2011 10:37:01 | 25.625 |
| 7/17/2010 18:23:00 | 23.0 | 3/15/2011 11:13:01 | 25.126 |
| 7/17/2010 18:58:00 | 23.0 | 3/15/2011 11:49:01 | 25.126 |
| 7/17/2010 19:33:00 | 23.0 | 3/15/2011 12:25:01 | 25.126 |
| 7/17/2010 20:08:00 | 23.0 | 3/15/2011 13:01:01 | 25.126 |
| 7/17/2010 20:43:00 | 23.0 | 3/15/2011 13:37:01 | 25.126 |
| 7/17/2010 21:18:00 | 23.5 | 3/15/2011 14:13:01 | 25.126 |
| 7/17/2010 21:53:00 | 23.5 | 3/15/2011 14:49:01 | 25.126 |
| 7/17/2010 22:28:00 | 23.5 | 3/15/2011 15:25:01 | 25.126 |
| 7/17/2010 23:03:00 | 23.5 | 3/15/2011 16:01:01 | 25.126 |
| 7/17/2010 23:38:00 | 23.5 | 3/15/2011 16:37:01 | 25.126 |
| 7/18/2010 00:13:00 | 23.5 | 3/15/2011 17:13:01 | 25.126 |
| 7/18/2010 00:48:00 | 23.5 | 3/15/2011 17:49:01 | 25.126 |
| 7/18/2010 01:23:00 | 23.5 | 3/15/2011 18:25:01 | 25.126 |
| 7/18/2010 01:58:00 | 23.5 | 3/15/2011 19:01:01 | 25.126 |
| 7/18/2010 02:33:00 | 23.5 | 3/15/2011 19:37:01 | 25.625 |

|                    |      |                    |        |
|--------------------|------|--------------------|--------|
| 7/18/2010 03:08:00 | 23.5 | 3/15/2011 20:13:01 | 25.625 |
| 7/18/2010 03:43:00 | 23.5 | 3/15/2011 20:49:01 | 25.625 |
| 7/18/2010 04:18:00 | 23.5 | 3/15/2011 21:25:01 | 25.625 |
| 7/18/2010 04:53:00 | 23.5 | 3/15/2011 22:01:01 | 25.625 |
| 7/18/2010 05:28:00 | 23.5 | 3/15/2011 22:37:01 | 25.625 |
| 7/18/2010 06:03:00 | 23.5 | 3/15/2011 23:13:01 | 25.625 |
| 7/18/2010 06:38:00 | 23.0 | 3/15/2011 23:49:01 | 25.625 |
| 7/18/2010 07:13:00 | 23.0 | 3/16/2011 00:25:01 | 25.625 |
| 7/18/2010 07:48:00 | 23.0 | 3/16/2011 01:01:01 | 25.625 |
| 7/18/2010 08:23:00 | 23.0 | 3/16/2011 01:37:01 | 25.625 |
| 7/18/2010 08:58:00 | 23.0 | 3/16/2011 02:13:01 | 25.625 |
| 7/18/2010 09:33:00 | 23.0 | 3/16/2011 02:49:01 | 25.625 |
| 7/18/2010 10:08:00 | 23.0 | 3/16/2011 03:25:01 | 25.625 |
| 7/18/2010 10:43:00 | 23.0 | 3/16/2011 04:01:01 | 25.625 |
| 7/18/2010 11:18:00 | 23.0 | 3/16/2011 04:37:01 | 25.625 |
| 7/18/2010 11:53:00 | 23.0 | 3/16/2011 05:13:01 | 25.625 |
| 7/18/2010 12:28:00 | 23.0 | 3/16/2011 05:49:01 | 25.625 |
| 7/18/2010 13:03:00 | 23.0 | 3/16/2011 06:25:01 | 25.625 |
| 7/18/2010 13:38:00 | 23.0 | 3/16/2011 07:01:01 | 25.126 |
| 7/18/2010 14:13:00 | 23.5 | 3/16/2011 07:37:01 | 25.625 |
| 7/18/2010 14:48:00 | 23.5 | 3/16/2011 08:13:01 | 25.625 |
| 7/18/2010 15:23:00 | 23.5 | 3/16/2011 08:49:01 | 25.625 |
| 7/18/2010 15:58:00 | 23.5 | 3/16/2011 09:25:01 | 25.625 |
| 7/18/2010 16:33:00 | 23.5 | 3/16/2011 10:01:01 | 25.625 |
| 7/18/2010 17:08:00 | 23.5 | 3/16/2011 10:37:01 | 25.126 |
| 7/18/2010 17:43:00 | 23.5 | 3/16/2011 11:13:01 | 25.625 |
| 7/18/2010 18:18:00 | 23.5 | 3/16/2011 11:49:01 | 25.625 |
| 7/18/2010 18:53:00 | 23.5 | 3/16/2011 12:25:01 | 25.625 |
| 7/18/2010 19:28:00 | 23.5 | 3/16/2011 13:01:01 | 25.625 |
| 7/18/2010 20:03:00 | 23.5 | 3/16/2011 13:37:01 | 25.625 |
| 7/18/2010 20:38:00 | 23.5 | 3/16/2011 14:13:01 | 25.625 |
| 7/18/2010 21:13:00 | 23.5 | 3/16/2011 14:49:01 | 25.625 |
| 7/18/2010 21:48:00 | 23.5 | 3/16/2011 15:25:01 | 25.625 |
| 7/18/2010 22:23:00 | 23.5 | 3/16/2011 16:01:01 | 25.625 |
| 7/18/2010 22:58:00 | 23.5 | 3/16/2011 16:37:01 | 25.126 |
| 7/18/2010 23:33:00 | 23.5 | 3/16/2011 17:13:01 | 25.126 |
| 7/19/2010 00:08:00 | 23.5 | 3/16/2011 17:49:01 | 25.126 |
| 7/19/2010 00:43:00 | 23.5 | 3/16/2011 18:25:01 | 25.126 |
| 7/19/2010 01:18:00 | 23.5 | 3/16/2011 19:01:01 | 25.126 |
| 7/19/2010 01:53:00 | 23.5 | 3/16/2011 19:37:01 | 25.625 |
| 7/19/2010 02:28:00 | 23.5 | 3/16/2011 20:13:01 | 25.625 |
| 7/19/2010 03:03:00 | 23.5 | 3/16/2011 20:49:01 | 26.125 |
| 7/19/2010 03:38:00 | 23.5 | 3/16/2011 21:25:01 | 26.125 |
| 7/19/2010 04:13:00 | 23.5 | 3/16/2011 22:01:01 | 25.625 |
| 7/19/2010 04:48:00 | 23.5 | 3/16/2011 22:37:01 | 25.625 |
| 7/19/2010 05:23:00 | 23.5 | 3/16/2011 23:13:01 | 25.625 |
| 7/19/2010 05:58:00 | 23.5 | 3/16/2011 23:49:01 | 25.625 |
| 7/19/2010 06:33:00 | 23.5 | 3/17/2011 00:25:01 | 25.625 |
| 7/19/2010 07:08:00 | 23.5 | 3/17/2011 01:01:01 | 25.625 |
| 7/19/2010 07:43:00 | 23.5 | 3/17/2011 01:37:01 | 25.625 |

|                    |      |                    |        |
|--------------------|------|--------------------|--------|
| 7/19/2010 08:18:00 | 23.5 | 3/17/2011 02:13:01 | 25.625 |
| 7/19/2010 08:53:00 | 23.5 | 3/17/2011 02:49:01 | 25.625 |
| 7/19/2010 09:28:00 | 23.5 | 3/17/2011 03:25:01 | 25.625 |
| 7/19/2010 10:03:00 | 23.5 | 3/17/2011 04:01:01 | 25.625 |
| 7/19/2010 10:38:00 | 23.5 | 3/17/2011 04:37:01 | 25.625 |
| 7/19/2010 11:13:00 | 23.5 | 3/17/2011 05:13:01 | 25.625 |
| 7/19/2010 11:48:00 | 23.5 | 3/17/2011 05:49:01 | 25.625 |
| 7/19/2010 12:23:00 | 23.5 | 3/17/2011 06:25:01 | 25.625 |
| 7/19/2010 12:58:00 | 23.5 | 3/17/2011 07:01:01 | 25.625 |
| 7/19/2010 13:33:00 | 23.5 | 3/17/2011 07:37:01 | 25.625 |
| 7/19/2010 14:08:00 | 23.5 | 3/17/2011 08:13:01 | 25.625 |
| 7/19/2010 14:43:00 | 23.5 | 3/17/2011 08:49:01 | 25.625 |
| 7/19/2010 15:18:00 | 23.5 | 3/17/2011 09:25:01 | 25.625 |
| 7/19/2010 15:53:00 | 23.5 | 3/17/2011 10:01:01 | 25.625 |
| 7/19/2010 16:28:00 | 23.5 | 3/17/2011 10:37:01 | 25.625 |
| 7/19/2010 17:03:00 | 23.5 | 3/17/2011 11:13:01 | 25.625 |
| 7/19/2010 17:38:00 | 23.5 | 3/17/2011 11:49:01 | 25.625 |
| 7/19/2010 18:13:00 | 23.5 | 3/17/2011 12:25:01 | 25.625 |
| 7/19/2010 18:48:00 | 23.5 | 3/17/2011 13:01:01 | 25.625 |
| 7/19/2010 19:23:00 | 23.5 | 3/17/2011 13:37:01 | 25.625 |
| 7/19/2010 19:58:00 | 23.5 | 3/17/2011 14:13:01 | 25.625 |
| 7/19/2010 20:33:00 | 23.5 | 3/17/2011 14:49:01 | 25.126 |
| 7/19/2010 21:08:00 | 23.5 | 3/17/2011 15:25:01 | 25.625 |
| 7/19/2010 21:43:00 | 23.5 | 3/17/2011 16:01:01 | 25.625 |
| 7/19/2010 22:18:00 | 23.5 | 3/17/2011 16:37:01 | 25.625 |
| 7/19/2010 22:53:00 | 23.5 | 3/17/2011 17:13:01 | 25.625 |
| 7/19/2010 23:28:00 | 23.5 | 3/17/2011 17:49:01 | 25.625 |
| 7/20/2010 00:03:00 | 23.5 | 3/17/2011 18:25:01 | 25.625 |
| 7/20/2010 00:38:00 | 23.5 | 3/17/2011 19:01:01 | 25.625 |
| 7/20/2010 01:13:00 | 23.5 | 3/17/2011 19:37:01 | 25.625 |
| 7/20/2010 01:48:00 | 23.5 | 3/17/2011 20:13:01 | 25.625 |
| 7/20/2010 02:23:00 | 23.5 | 3/17/2011 20:49:01 | 25.625 |
| 7/20/2010 02:58:00 | 23.5 | 3/17/2011 21:25:01 | 25.625 |
| 7/20/2010 03:33:00 | 23.5 | 3/17/2011 22:01:01 | 25.625 |
| 7/20/2010 04:08:00 | 23.5 | 3/17/2011 22:37:01 | 25.625 |
| 7/20/2010 04:43:00 | 23.5 | 3/17/2011 23:13:01 | 25.625 |
| 7/20/2010 05:18:00 | 23.5 | 3/17/2011 23:49:01 | 25.625 |
| 7/20/2010 05:53:00 | 23.5 | 3/18/2011 00:25:01 | 25.625 |
| 7/20/2010 06:28:00 | 23.5 | 3/18/2011 01:01:01 | 25.625 |
| 7/20/2010 07:03:00 | 23.5 | 3/18/2011 01:37:01 | 25.625 |
| 7/20/2010 07:38:00 | 23.5 | 3/18/2011 02:13:01 | 25.625 |
| 7/20/2010 08:13:00 | 23.5 | 3/18/2011 02:49:01 | 25.625 |
| 7/20/2010 08:48:00 | 23.0 | 3/18/2011 03:25:01 | 25.625 |
| 7/20/2010 09:23:00 | 23.0 | 3/18/2011 04:01:01 | 25.625 |
| 7/20/2010 09:58:00 | 23.0 | 3/18/2011 04:37:01 | 25.625 |
| 7/20/2010 10:33:00 | 23.0 | 3/18/2011 05:13:01 | 25.625 |
| 7/20/2010 11:08:00 | 23.0 | 3/18/2011 05:49:01 | 25.625 |
| 7/20/2010 11:43:00 | 23.0 | 3/18/2011 06:25:01 | 25.625 |
| 7/20/2010 12:18:00 | 23.0 | 3/18/2011 07:01:01 | 25.625 |
| 7/20/2010 12:53:00 | 23.0 | 3/18/2011 07:37:01 | 25.625 |

|                    |      |                    |        |
|--------------------|------|--------------------|--------|
| 7/20/2010 13:28:00 | 23.0 | 3/18/2011 08:13:01 | 25.625 |
| 7/20/2010 14:03:00 | 23.0 | 3/18/2011 08:49:01 | 25.625 |
| 7/20/2010 14:38:00 | 23.5 | 3/18/2011 09:25:01 | 25.625 |
| 7/20/2010 15:13:00 | 23.5 | 3/18/2011 10:01:01 | 25.625 |
| 7/20/2010 15:48:00 | 23.5 | 3/18/2011 10:37:01 | 25.625 |
| 7/20/2010 16:23:00 | 23.5 | 3/18/2011 11:13:01 | 25.625 |
| 7/20/2010 16:58:00 | 23.5 | 3/18/2011 11:49:01 | 25.625 |
| 7/20/2010 17:33:00 | 23.5 | 3/18/2011 12:25:01 | 25.625 |
| 7/20/2010 18:08:00 | 23.5 | 3/18/2011 13:01:01 | 25.625 |
| 7/20/2010 18:43:00 | 23.5 | 3/18/2011 13:37:01 | 25.625 |
| 7/20/2010 19:18:00 | 23.5 | 3/18/2011 14:13:01 | 25.625 |
| 7/20/2010 19:53:00 | 23.5 | 3/18/2011 14:49:01 | 25.625 |
| 7/20/2010 20:28:00 | 23.5 | 3/18/2011 15:25:01 | 25.625 |
| 7/20/2010 21:03:00 | 23.5 | 3/18/2011 16:01:01 | 25.625 |
| 7/20/2010 21:38:00 | 23.5 | 3/18/2011 16:37:01 | 25.625 |
| 7/20/2010 22:13:00 | 23.5 | 3/18/2011 17:13:01 | 25.625 |
| 7/20/2010 22:48:00 | 23.5 | 3/18/2011 17:49:01 | 25.625 |
| 7/20/2010 23:23:00 | 23.5 | 3/18/2011 18:25:01 | 25.625 |
| 7/20/2010 23:58:00 | 23.5 | 3/18/2011 19:01:01 | 25.625 |
| 7/21/2010 00:33:00 | 23.5 | 3/18/2011 19:37:01 | 25.625 |
| 7/21/2010 01:08:00 | 23.5 | 3/18/2011 20:13:01 | 25.625 |
| 7/21/2010 01:43:00 | 23.5 | 3/18/2011 20:49:01 | 25.625 |
| 7/21/2010 02:18:00 | 23.5 | 3/18/2011 21:25:01 | 25.625 |
| 7/21/2010 02:53:00 | 23.5 | 3/18/2011 22:01:01 | 25.625 |
| 7/21/2010 03:28:00 | 23.5 | 3/18/2011 22:37:01 | 25.625 |
| 7/21/2010 04:03:00 | 23.5 | 3/18/2011 23:13:01 | 25.625 |
| 7/21/2010 04:38:00 | 23.5 | 3/18/2011 23:49:01 | 25.625 |
| 7/21/2010 05:13:00 | 23.5 | 3/19/2011 00:25:01 | 25.625 |
| 7/21/2010 05:48:00 | 23.5 | 3/19/2011 01:01:01 | 25.625 |
| 7/21/2010 06:23:00 | 23.5 | 3/19/2011 01:37:01 | 25.625 |
| 7/21/2010 06:58:00 | 23.5 | 3/19/2011 02:13:01 | 25.625 |
| 7/21/2010 07:33:00 | 23.5 | 3/19/2011 02:49:01 | 25.625 |
| 7/21/2010 08:08:00 | 23.5 | 3/19/2011 03:25:01 | 25.625 |
| 7/21/2010 08:43:00 | 23.0 | 3/19/2011 04:01:01 | 25.625 |
| 7/21/2010 09:18:00 | 23.0 | 3/19/2011 04:37:01 | 25.625 |
| 7/21/2010 09:53:00 | 23.0 | 3/19/2011 05:13:01 | 25.625 |
| 7/21/2010 10:28:00 | 23.0 | 3/19/2011 05:49:01 | 25.625 |
| 7/21/2010 11:03:00 | 23.0 | 3/19/2011 06:25:01 | 25.625 |
| 7/21/2010 11:38:00 | 23.0 | 3/19/2011 07:01:01 | 25.625 |
| 7/21/2010 12:13:00 | 23.0 | 3/19/2011 07:37:01 | 25.625 |
| 7/21/2010 12:48:00 | 23.0 | 3/19/2011 08:13:01 | 25.625 |
| 7/21/2010 13:23:00 | 23.0 | 3/19/2011 08:49:01 | 25.625 |
| 7/21/2010 13:58:00 | 23.0 | 3/19/2011 09:25:01 | 25.625 |
| 7/21/2010 14:33:00 | 23.0 | 3/19/2011 10:01:01 | 25.126 |
| 7/21/2010 15:08:00 | 23.0 | 3/19/2011 10:37:01 | 25.126 |
| 7/21/2010 15:43:00 | 23.0 | 3/19/2011 11:13:01 | 25.126 |
| 7/21/2010 16:18:00 | 23.0 | 3/19/2011 11:49:01 | 25.126 |
| 7/21/2010 16:53:00 | 23.5 | 3/19/2011 12:25:01 | 25.126 |
| 7/21/2010 17:28:00 | 23.5 | 3/19/2011 13:01:01 | 25.126 |
| 7/21/2010 18:03:00 | 23.5 | 3/19/2011 13:37:01 | 25.126 |

|                    |      |                    |        |
|--------------------|------|--------------------|--------|
| 7/21/2010 18:38:00 | 23.5 | 3/19/2011 14:13:01 | 25.126 |
| 7/21/2010 19:13:00 | 23.5 | 3/19/2011 14:49:01 | 25.126 |
| 7/21/2010 19:48:00 | 23.5 | 3/19/2011 15:25:01 | 25.126 |
| 7/21/2010 20:23:00 | 23.5 | 3/19/2011 16:01:01 | 25.126 |
| 7/21/2010 20:58:00 | 23.5 | 3/19/2011 16:37:01 | 25.126 |
| 7/21/2010 21:33:00 | 23.5 | 3/19/2011 17:13:01 | 25.625 |
| 7/21/2010 22:08:00 | 23.5 | 3/19/2011 17:49:01 | 25.625 |
| 7/21/2010 22:43:00 | 23.5 | 3/19/2011 18:25:01 | 25.625 |
| 7/21/2010 23:18:00 | 23.5 | 3/19/2011 19:01:01 | 25.625 |
| 7/21/2010 23:53:00 | 23.5 | 3/19/2011 19:37:01 | 25.625 |
| 7/22/2010 00:28:00 | 23.5 | 3/19/2011 20:13:01 | 25.126 |
| 7/22/2010 01:03:00 | 23.5 | 3/19/2011 20:49:01 | 25.625 |
| 7/22/2010 01:38:00 | 23.5 | 3/19/2011 21:25:01 | 25.625 |
| 7/22/2010 02:13:00 | 23.5 | 3/19/2011 22:01:01 | 25.625 |
| 7/22/2010 02:48:00 | 23.5 | 3/19/2011 22:37:01 | 25.625 |
| 7/22/2010 03:23:00 | 23.5 | 3/19/2011 23:13:01 | 25.625 |
| 7/22/2010 03:58:00 | 23.5 | 3/19/2011 23:49:01 | 25.625 |
| 7/22/2010 04:33:00 | 23.5 | 3/20/2011 00:25:01 | 25.625 |
| 7/22/2010 05:08:00 | 23.0 | 3/20/2011 01:01:01 | 25.625 |
| 7/22/2010 05:43:00 | 23.0 | 3/20/2011 01:37:01 | 25.625 |
| 7/22/2010 06:18:00 | 23.0 | 3/20/2011 02:13:01 | 25.625 |
| 7/22/2010 06:53:00 | 23.0 | 3/20/2011 02:49:01 | 25.625 |
| 7/22/2010 07:28:00 | 23.0 | 3/20/2011 03:25:01 | 25.625 |
| 7/22/2010 08:03:00 | 23.0 | 3/20/2011 04:01:01 | 25.625 |
| 7/22/2010 08:38:00 | 23.0 | 3/20/2011 04:37:01 | 25.625 |
| 7/22/2010 09:13:00 | 23.0 | 3/20/2011 05:13:01 | 25.625 |
| 7/22/2010 09:48:00 | 23.0 | 3/20/2011 05:49:01 | 25.625 |
| 7/22/2010 10:23:00 | 23.0 | 3/20/2011 06:25:01 | 25.625 |
| 7/22/2010 10:58:00 | 23.0 | 3/20/2011 07:01:01 | 25.625 |
| 7/22/2010 11:33:00 | 23.0 | 3/20/2011 07:37:01 | 25.625 |
| 7/22/2010 12:08:00 | 23.0 | 3/20/2011 08:13:01 | 25.625 |
| 7/22/2010 12:43:00 | 23.0 | 3/20/2011 08:49:01 | 25.126 |
| 7/22/2010 13:18:00 | 23.0 | 3/20/2011 09:25:01 | 25.126 |
| 7/22/2010 13:53:00 | 23.0 | 3/20/2011 10:01:01 | 25.625 |
| 7/22/2010 14:28:00 | 23.0 | 3/20/2011 10:37:01 | 25.625 |
| 7/22/2010 15:03:00 | 23.0 | 3/20/2011 11:13:01 | 25.126 |
| 7/22/2010 15:38:00 | 23.0 | 3/20/2011 11:49:01 | 25.126 |
| 7/22/2010 16:13:00 | 23.0 | 3/20/2011 12:25:01 | 25.126 |
| 7/22/2010 16:48:00 | 23.0 | 3/20/2011 13:01:01 | 25.126 |
| 7/22/2010 17:23:00 | 23.0 | 3/20/2011 13:37:01 | 25.126 |
| 7/22/2010 17:58:00 | 23.0 | 3/20/2011 14:13:01 | 25.126 |
| 7/22/2010 18:33:00 | 23.0 | 3/20/2011 14:49:01 | 25.126 |
| 7/22/2010 19:08:00 | 23.0 | 3/20/2011 15:25:01 | 25.126 |
| 7/22/2010 19:43:00 | 23.5 | 3/20/2011 16:01:01 | 25.126 |
| 7/22/2010 20:18:00 | 23.5 | 3/20/2011 16:37:01 | 25.126 |
| 7/22/2010 20:53:00 | 23.5 | 3/20/2011 17:13:01 | 25.126 |
| 7/22/2010 21:28:00 | 23.5 | 3/20/2011 17:49:01 | 25.126 |
| 7/22/2010 22:03:00 | 23.5 | 3/20/2011 18:25:01 | 25.126 |
| 7/22/2010 22:38:00 | 23.5 | 3/20/2011 19:01:01 | 25.126 |
| 7/22/2010 23:13:00 | 23.5 | 3/20/2011 19:37:01 | 25.126 |

|                    |      |                    |        |
|--------------------|------|--------------------|--------|
| 7/22/2010 23:48:00 | 23.5 | 3/20/2011 20:13:01 | 25.126 |
| 7/23/2010 00:23:00 | 23.5 | 3/20/2011 20:49:01 | 25.126 |
| 7/23/2010 00:58:00 | 23.5 | 3/20/2011 21:25:01 | 25.126 |
| 7/23/2010 01:33:00 | 23.5 | 3/20/2011 22:01:01 | 25.126 |
| 7/23/2010 02:08:00 | 23.5 | 3/20/2011 22:37:01 | 25.126 |
| 7/23/2010 02:43:00 | 23.5 | 3/20/2011 23:13:01 | 25.126 |
| 7/23/2010 03:18:00 | 23.5 | 3/20/2011 23:49:01 | 25.126 |
| 7/23/2010 03:53:00 | 23.5 | 3/21/2011 00:25:01 | 25.126 |
| 7/23/2010 04:28:00 | 23.5 | 3/21/2011 01:01:01 | 25.126 |
| 7/23/2010 05:03:00 | 23.5 | 3/21/2011 01:37:01 | 25.126 |
| 7/23/2010 05:38:00 | 23.5 | 3/21/2011 02:13:01 | 25.126 |
| 7/23/2010 06:13:00 | 23.5 | 3/21/2011 02:49:01 | 25.126 |
| 7/23/2010 06:48:00 | 23.5 | 3/21/2011 03:25:01 | 25.126 |
| 7/23/2010 07:23:00 | 23.5 | 3/21/2011 04:01:01 | 25.126 |
| 7/23/2010 07:58:00 | 23.5 | 3/21/2011 04:37:01 | 25.126 |
| 7/23/2010 08:33:00 | 23.5 | 3/21/2011 05:13:01 | 25.126 |
| 7/23/2010 09:08:00 | 23.0 | 3/21/2011 05:49:01 | 25.126 |
| 7/23/2010 09:43:00 | 23.0 | 3/21/2011 06:25:01 | 25.126 |
| 7/23/2010 10:18:00 | 23.0 | 3/21/2011 07:01:01 | 25.126 |
| 7/23/2010 10:53:00 | 23.0 | 3/21/2011 07:37:01 | 25.126 |
| 7/23/2010 11:28:00 | 23.0 | 3/21/2011 08:13:01 | 25.126 |
| 7/23/2010 12:03:00 | 23.0 | 3/21/2011 08:49:01 | 25.126 |
| 7/23/2010 12:38:00 | 23.0 | 3/21/2011 09:25:01 | 25.126 |
| 7/23/2010 13:13:00 | 23.0 | 3/21/2011 10:01:01 | 25.126 |
| 7/23/2010 13:48:00 | 23.0 | 3/21/2011 10:37:01 | 25.126 |
| 7/23/2010 14:23:00 | 23.0 | 3/21/2011 11:13:01 | 25.126 |
| 7/23/2010 14:58:00 | 23.5 | 3/21/2011 11:49:01 | 25.126 |
| 7/23/2010 15:33:00 | 23.5 | 3/21/2011 12:25:01 | 25.126 |
| 7/23/2010 16:08:00 | 23.5 | 3/21/2011 13:01:01 | 25.126 |
| 7/23/2010 16:43:00 | 23.5 | 3/21/2011 13:37:01 | 25.126 |
| 7/23/2010 17:18:00 | 23.5 | 3/21/2011 14:13:01 | 25.126 |
| 7/23/2010 17:53:00 | 23.5 | 3/21/2011 14:49:01 | 25.126 |
| 7/23/2010 18:28:00 | 23.5 | 3/21/2011 15:25:01 | 25.126 |
| 7/23/2010 19:03:00 | 23.5 | 3/21/2011 16:01:01 | 25.126 |
| 7/23/2010 19:38:00 | 23.5 | 3/21/2011 16:37:01 | 25.126 |
| 7/23/2010 20:13:00 | 23.5 | 3/21/2011 17:13:01 | 25.126 |
| 7/23/2010 20:48:00 | 23.5 | 3/21/2011 17:49:01 | 25.126 |
| 7/23/2010 21:23:00 | 23.5 | 3/21/2011 18:25:01 | 25.126 |
| 7/23/2010 21:58:00 | 23.5 | 3/21/2011 19:01:01 | 25.126 |
| 7/23/2010 22:33:00 | 23.5 | 3/21/2011 19:37:01 | 25.126 |
| 7/23/2010 23:08:00 | 23.5 | 3/21/2011 20:13:01 | 25.126 |
| 7/23/2010 23:43:00 | 23.5 | 3/21/2011 20:49:01 | 25.126 |
| 7/24/2010 00:18:00 | 23.5 | 3/21/2011 21:25:01 | 25.126 |
| 7/24/2010 00:53:00 | 23.5 | 3/21/2011 22:01:01 | 25.126 |
| 7/24/2010 01:28:00 | 23.5 | 3/21/2011 22:37:01 | 25.126 |
| 7/24/2010 02:03:00 | 23.5 | 3/21/2011 23:13:01 | 25.126 |
| 7/24/2010 02:38:00 | 23.5 | 3/21/2011 23:49:01 | 25.126 |
| 7/24/2010 03:13:00 | 23.5 | 3/22/2011 00:25:01 | 25.126 |
| 7/24/2010 03:48:00 | 23.5 | 3/22/2011 01:01:01 | 25.126 |
| 7/24/2010 04:23:00 | 23.5 | 3/22/2011 01:37:01 | 25.126 |



|                    |      |                    |        |
|--------------------|------|--------------------|--------|
| 7/24/2010 04:58:00 | 23.5 | 3/22/2011 02:13:01 | 25.126 |
| 7/24/2010 05:33:00 | 23.5 | 3/22/2011 02:49:01 | 25.126 |
| 7/24/2010 06:08:00 | 23.0 | 3/22/2011 03:25:01 | 25.126 |
| 7/24/2010 06:43:00 | 23.0 | 3/22/2011 04:01:01 | 25.625 |
| 7/24/2010 07:18:00 | 23.0 | 3/22/2011 04:37:01 | 25.625 |
| 7/24/2010 07:53:00 | 23.0 | 3/22/2011 05:13:01 | 25.625 |
| 7/24/2010 08:28:00 | 23.0 | 3/22/2011 05:49:01 | 25.625 |
| 7/24/2010 09:03:00 | 23.0 | 3/22/2011 06:25:01 | 25.625 |
| 7/24/2010 09:38:00 | 23.0 | 3/22/2011 07:01:01 | 25.625 |
| 7/24/2010 10:13:00 | 23.0 | 3/22/2011 07:37:01 | 25.625 |
| 7/24/2010 10:48:00 | 23.0 | 3/22/2011 08:13:01 | 25.625 |
| 7/24/2010 11:23:00 | 23.0 | 3/22/2011 08:49:01 | 25.126 |
| 7/24/2010 11:58:00 | 23.0 | 3/22/2011 09:25:01 | 25.126 |
| 7/24/2010 12:33:00 | 23.0 | 3/22/2011 10:01:01 | 25.126 |
| 7/24/2010 13:08:00 | 23.0 | 3/22/2011 10:37:01 | 25.126 |
| 7/24/2010 13:43:00 | 23.0 | 3/22/2011 11:13:01 | 25.126 |
| 7/24/2010 14:18:00 | 23.0 | 3/22/2011 11:49:01 | 25.126 |
| 7/24/2010 14:53:00 | 23.0 | 3/22/2011 12:25:01 | 25.126 |
| 7/24/2010 15:28:00 | 23.0 | 3/22/2011 13:01:01 | 25.126 |
| 7/24/2010 16:03:00 | 23.0 | 3/22/2011 13:37:01 | 25.126 |
| 7/24/2010 16:38:00 | 23.0 | 3/22/2011 14:13:01 | 25.126 |
| 7/24/2010 17:13:00 | 23.5 | 3/22/2011 14:49:01 | 25.126 |
| 7/24/2010 17:48:00 | 23.5 | 3/22/2011 15:25:01 | 25.126 |
| 7/24/2010 18:23:00 | 23.5 | 3/22/2011 16:01:01 | 25.126 |
| 7/24/2010 18:58:00 | 23.5 | 3/22/2011 16:37:01 | 25.126 |
| 7/24/2010 19:33:00 | 23.5 | 3/22/2011 17:13:01 | 25.126 |
| 7/24/2010 20:08:00 | 23.5 | 3/22/2011 17:49:01 | 25.126 |
| 7/24/2010 20:43:00 | 23.5 | 3/22/2011 18:25:01 | 25.126 |
| 7/24/2010 21:18:00 | 23.5 | 3/22/2011 19:01:01 | 25.625 |
| 7/24/2010 21:53:00 | 23.5 | 3/22/2011 19:37:01 | 25.625 |
| 7/24/2010 22:28:00 | 23.5 | 3/22/2011 20:13:01 | 25.625 |
| 7/24/2010 23:03:00 | 23.5 | 3/22/2011 20:49:01 | 25.625 |
| 7/24/2010 23:38:00 | 23.5 | 3/22/2011 21:25:01 | 25.625 |
| 7/25/2010 00:13:00 | 23.5 | 3/22/2011 22:01:01 | 25.625 |
| 7/25/2010 00:48:00 | 23.5 | 3/22/2011 22:37:01 | 25.625 |
| 7/25/2010 01:23:00 | 23.5 | 3/22/2011 23:13:01 | 25.625 |
| 7/25/2010 01:58:00 | 23.5 | 3/22/2011 23:49:01 | 25.625 |
| 7/25/2010 02:33:00 | 23.5 | 3/23/2011 00:25:01 | 25.625 |
| 7/25/2010 03:08:00 | 23.5 | 3/23/2011 01:01:01 | 25.625 |
| 7/25/2010 03:43:00 | 23.5 | 3/23/2011 01:37:01 | 25.625 |
| 7/25/2010 04:18:00 | 23.5 | 3/23/2011 02:13:01 | 25.625 |
| 7/25/2010 04:53:00 | 23.5 | 3/23/2011 02:49:01 | 25.625 |
| 7/25/2010 05:28:00 | 23.5 | 3/23/2011 03:25:01 | 25.625 |
| 7/25/2010 06:03:00 | 23.5 | 3/23/2011 04:01:01 | 25.625 |
| 7/25/2010 06:38:00 | 23.0 | 3/23/2011 04:37:01 | 25.625 |
| 7/25/2010 07:13:00 | 23.0 | 3/23/2011 05:13:01 | 25.625 |
| 7/25/2010 07:48:00 | 23.0 | 3/23/2011 05:49:01 | 25.625 |
| 7/25/2010 08:23:00 | 23.0 | 3/23/2011 06:25:01 | 25.625 |
| 7/25/2010 08:58:00 | 23.0 | 3/23/2011 07:01:01 | 25.625 |
| 7/25/2010 09:33:00 | 23.0 | 3/23/2011 07:37:01 | 25.625 |

|                    |      |                    |        |
|--------------------|------|--------------------|--------|
| 7/25/2010 10:08:00 | 23.0 | 3/23/2011 08:13:01 | 25.625 |
| 7/25/2010 10:43:00 | 23.0 | 3/23/2011 08:49:01 | 25.625 |
| 7/25/2010 11:18:00 | 23.0 | 3/23/2011 09:25:01 | 25.625 |
| 7/25/2010 11:53:00 | 23.0 | 3/23/2011 10:01:01 | 25.625 |
| 7/25/2010 12:28:00 | 23.0 | 3/23/2011 10:37:01 | 25.625 |
| 7/25/2010 13:03:00 | 23.0 | 3/23/2011 11:13:01 | 25.625 |
| 7/25/2010 13:38:00 | 23.0 | 3/23/2011 11:49:01 | 25.625 |
| 7/25/2010 14:13:00 | 23.0 | 3/23/2011 12:25:01 | 25.625 |
| 7/25/2010 14:48:00 | 23.0 | 3/23/2011 13:01:01 | 25.625 |
| 7/25/2010 15:23:00 | 23.0 | 3/23/2011 13:37:01 | 25.625 |
| 7/25/2010 15:58:00 | 23.0 | 3/23/2011 14:13:01 | 25.625 |
| 7/25/2010 16:33:00 | 23.0 | 3/23/2011 14:49:01 | 25.625 |
| 7/25/2010 17:08:00 | 23.0 | 3/23/2011 15:25:01 | 25.625 |
| 7/25/2010 17:43:00 | 23.0 | 3/23/2011 16:01:01 | 25.625 |
| 7/25/2010 18:18:00 | 23.5 | 3/23/2011 16:37:01 | 25.625 |
| 7/25/2010 18:53:00 | 23.5 | 3/23/2011 17:13:01 | 25.625 |
| 7/25/2010 19:28:00 | 23.5 | 3/23/2011 17:49:01 | 25.625 |
| 7/25/2010 20:03:00 | 23.5 | 3/23/2011 18:25:01 | 25.625 |
| 7/25/2010 20:38:00 | 23.5 | 3/23/2011 19:01:01 | 25.625 |
| 7/25/2010 21:13:00 | 23.5 | 3/23/2011 19:37:01 | 25.625 |
| 7/25/2010 21:48:00 | 23.5 | 3/23/2011 20:13:01 | 25.625 |
| 7/25/2010 22:23:00 | 23.5 | 3/23/2011 20:49:01 | 25.625 |
| 7/25/2010 22:58:00 | 23.5 | 3/23/2011 21:25:01 | 25.625 |
| 7/25/2010 23:33:00 | 23.5 | 3/23/2011 22:01:01 | 25.625 |
| 7/26/2010 00:08:00 | 23.5 | 3/23/2011 22:37:01 | 25.625 |
| 7/26/2010 00:43:00 | 23.5 | 3/23/2011 23:13:01 | 25.625 |
| 7/26/2010 01:18:00 | 23.5 | 3/23/2011 23:49:01 | 25.625 |
| 7/26/2010 01:53:00 | 23.5 | 3/24/2011 00:25:01 | 25.625 |
| 7/26/2010 02:28:00 | 23.5 | 3/24/2011 01:01:01 | 25.625 |
| 7/26/2010 03:03:00 | 23.5 | 3/24/2011 01:37:01 | 25.625 |
| 7/26/2010 03:38:00 | 23.5 | 3/24/2011 02:13:01 | 25.625 |
| 7/26/2010 04:13:00 | 23.5 | 3/24/2011 02:49:01 | 25.625 |
| 7/26/2010 04:48:00 | 23.5 | 3/24/2011 03:25:01 | 25.625 |
| 7/26/2010 05:23:00 | 23.5 | 3/24/2011 04:01:01 | 25.625 |
| 7/26/2010 05:58:00 | 23.0 | 3/24/2011 04:37:01 | 25.625 |
| 7/26/2010 06:33:00 | 23.0 | 3/24/2011 05:13:01 | 25.625 |
| 7/26/2010 07:08:00 | 23.0 | 3/24/2011 05:49:01 | 25.625 |
| 7/26/2010 07:43:00 | 23.0 | 3/24/2011 06:25:01 | 25.625 |
| 7/26/2010 08:18:00 | 23.0 | 3/24/2011 07:01:01 | 25.625 |
| 7/26/2010 08:53:00 | 23.0 | 3/24/2011 07:37:01 | 25.625 |
| 7/26/2010 09:28:00 | 23.0 | 3/24/2011 08:13:01 | 25.625 |
| 7/26/2010 10:03:00 | 23.0 | 3/24/2011 08:49:01 | 25.625 |
| 7/26/2010 10:38:00 | 23.0 | 3/24/2011 09:25:01 | 25.625 |
| 7/26/2010 11:13:00 | 23.0 | 3/24/2011 10:01:01 | 25.625 |
| 7/26/2010 11:48:00 | 23.0 | 3/24/2011 10:37:01 | 25.625 |
| 7/26/2010 12:23:00 | 23.0 | 3/24/2011 11:13:01 | 25.625 |
| 7/26/2010 12:58:00 | 23.0 | 3/24/2011 11:49:01 | 25.625 |
| 7/26/2010 13:33:00 | 23.0 | 3/24/2011 12:25:01 | 25.625 |
| 7/26/2010 14:08:00 | 23.0 | 3/24/2011 13:01:01 | 25.625 |
| 7/26/2010 14:43:00 | 23.0 | 3/24/2011 13:37:01 | 25.625 |

|                    |      |                    |        |
|--------------------|------|--------------------|--------|
| 7/26/2010 15:18:00 | 23.0 | 3/24/2011 14:13:01 | 25.625 |
| 7/26/2010 15:53:00 | 23.0 | 3/24/2011 14:49:01 | 25.625 |
| 7/26/2010 16:28:00 | 23.0 | 3/24/2011 15:25:01 | 25.625 |
| 7/26/2010 17:03:00 | 23.0 | 3/24/2011 16:01:01 | 25.625 |
| 7/26/2010 17:38:00 | 23.0 | 3/24/2011 16:37:01 | 25.625 |
| 7/26/2010 18:13:00 | 23.0 | 3/24/2011 17:13:01 | 25.625 |
| 7/26/2010 18:48:00 | 23.0 | 3/24/2011 17:49:01 | 25.625 |
| 7/26/2010 19:23:00 | 23.0 | 3/24/2011 18:25:01 | 25.625 |
| 7/26/2010 19:58:00 | 23.5 | 3/24/2011 19:01:01 | 25.625 |
| 7/26/2010 20:33:00 | 23.0 | 3/24/2011 19:37:01 | 25.625 |
| 7/26/2010 21:08:00 | 23.5 | 3/24/2011 20:13:01 | 25.625 |
| 7/26/2010 21:43:00 | 23.0 | 3/24/2011 20:49:01 | 25.625 |
| 7/26/2010 22:18:00 | 23.5 | 3/24/2011 21:25:01 | 25.625 |
| 7/26/2010 22:53:00 | 23.5 | 3/24/2011 22:01:01 | 25.625 |
| 7/26/2010 23:28:00 | 23.5 | 3/24/2011 22:37:01 | 25.625 |
| 7/27/2010 00:03:00 | 23.5 | 3/24/2011 23:13:01 | 25.625 |
| 7/27/2010 00:38:00 | 23.5 | 3/24/2011 23:49:01 | 25.625 |
| 7/27/2010 01:13:00 | 23.5 | 3/25/2011 00:25:01 | 25.625 |
| 7/27/2010 01:48:00 | 23.5 | 3/25/2011 01:01:01 | 25.625 |
| 7/27/2010 02:23:00 | 23.5 | 3/25/2011 01:37:01 | 25.625 |
| 7/27/2010 02:58:00 | 23.5 | 3/25/2011 02:13:01 | 25.625 |
| 7/27/2010 03:33:00 | 23.5 | 3/25/2011 02:49:01 | 25.625 |
| 7/27/2010 04:08:00 | 23.5 | 3/25/2011 03:25:01 | 25.625 |
| 7/27/2010 04:43:00 | 23.5 | 3/25/2011 04:01:01 | 25.625 |
| 7/27/2010 05:18:00 | 23.0 | 3/25/2011 04:37:01 | 25.625 |
| 7/27/2010 05:53:00 | 23.0 | 3/25/2011 05:13:01 | 25.625 |
| 7/27/2010 06:28:00 | 23.0 | 3/25/2011 05:49:01 | 25.625 |
| 7/27/2010 07:03:00 | 23.0 | 3/25/2011 06:25:01 | 25.625 |
| 7/27/2010 07:38:00 | 23.0 | 3/25/2011 07:01:01 | 25.625 |
| 7/27/2010 08:13:00 | 23.0 | 3/25/2011 07:37:01 | 25.625 |
| 7/27/2010 08:48:00 | 23.0 | 3/25/2011 08:13:01 | 25.625 |
| 7/27/2010 09:23:00 | 23.0 | 3/25/2011 08:49:01 | 25.625 |
| 7/27/2010 09:58:00 | 23.0 | 3/25/2011 09:25:01 | 25.625 |
| 7/27/2010 10:33:00 | 23.0 | 3/25/2011 10:01:01 | 25.625 |
| 7/27/2010 11:08:00 | 23.0 | 3/25/2011 10:37:01 | 25.625 |
| 7/27/2010 11:43:00 | 23.0 | 3/25/2011 11:13:01 | 25.625 |
| 7/27/2010 12:18:00 | 23.0 | 3/25/2011 11:49:01 | 25.625 |
| 7/27/2010 12:53:00 | 23.0 | 3/25/2011 12:25:01 | 25.625 |
| 7/27/2010 13:28:00 | 23.0 | 3/25/2011 13:01:01 | 25.625 |
| 7/27/2010 14:03:00 | 23.0 | 3/25/2011 13:37:01 | 25.625 |
| 7/27/2010 14:38:00 | 23.0 | 3/25/2011 14:13:01 | 25.625 |
| 7/27/2010 15:13:00 | 23.0 | 3/25/2011 14:49:01 | 25.625 |
| 7/27/2010 15:48:00 | 23.0 | 3/25/2011 15:25:01 | 25.625 |
| 7/27/2010 16:23:00 | 23.5 | 3/25/2011 16:01:01 | 25.625 |
| 7/27/2010 16:58:00 | 23.5 | 3/25/2011 16:37:01 | 25.625 |
| 7/27/2010 17:33:00 | 23.5 | 3/25/2011 17:13:01 | 25.625 |
| 7/27/2010 18:08:00 | 23.5 | 3/25/2011 17:49:01 | 25.625 |
| 7/27/2010 18:43:00 | 23.5 | 3/25/2011 18:25:01 | 25.625 |
| 7/27/2010 19:18:00 | 23.5 | 3/25/2011 19:01:01 | 25.625 |
| 7/27/2010 19:53:00 | 23.5 | 3/25/2011 19:37:01 | 25.625 |

|                    |      |                    |        |
|--------------------|------|--------------------|--------|
| 7/27/2010 20:28:00 | 23.5 | 3/25/2011 20:13:01 | 25.625 |
| 7/27/2010 21:03:00 | 23.5 | 3/25/2011 20:49:01 | 25.625 |
| 7/27/2010 21:38:00 | 23.5 | 3/25/2011 21:25:01 | 25.625 |
| 7/27/2010 22:13:00 | 23.5 | 3/25/2011 22:01:01 | 25.625 |
| 7/27/2010 22:48:00 | 23.5 | 3/25/2011 22:37:01 | 25.625 |
| 7/27/2010 23:23:00 | 23.5 | 3/25/2011 23:13:01 | 25.625 |
| 7/27/2010 23:58:00 | 23.5 | 3/25/2011 23:49:01 | 25.625 |
| 7/28/2010 00:33:00 | 23.5 | 3/26/2011 00:25:01 | 25.625 |
| 7/28/2010 01:08:00 | 23.5 | 3/26/2011 01:01:01 | 25.625 |
| 7/28/2010 01:43:00 | 23.5 | 3/26/2011 01:37:01 | 25.625 |
| 7/28/2010 02:18:00 | 23.5 | 3/26/2011 02:13:01 | 25.625 |
| 7/28/2010 02:53:00 | 23.5 | 3/26/2011 02:49:01 | 25.625 |
| 7/28/2010 03:28:00 | 23.5 | 3/26/2011 03:25:01 | 25.625 |
| 7/28/2010 04:03:00 | 23.5 | 3/26/2011 04:01:01 | 25.625 |
| 7/28/2010 04:38:00 | 23.0 | 3/26/2011 04:37:01 | 25.625 |
| 7/28/2010 05:13:00 | 23.0 | 3/26/2011 05:13:01 | 25.625 |
| 7/28/2010 05:48:00 | 23.0 | 3/26/2011 05:49:01 | 25.625 |
| 7/28/2010 06:23:00 | 23.0 | 3/26/2011 06:25:01 | 25.625 |
| 7/28/2010 06:58:00 | 23.0 | 3/26/2011 07:01:01 | 25.625 |
| 7/28/2010 07:33:00 | 23.0 | 3/26/2011 07:37:01 | 25.625 |
| 7/28/2010 08:08:00 | 23.0 | 3/26/2011 08:13:01 | 25.625 |
| 7/28/2010 08:43:00 | 23.0 | 3/26/2011 08:49:01 | 25.625 |
| 7/28/2010 09:18:00 | 23.0 | 3/26/2011 09:25:01 | 25.625 |
| 7/28/2010 09:53:00 | 23.0 | 3/26/2011 10:01:01 | 25.625 |
| 7/28/2010 10:28:00 | 23.0 | 3/26/2011 10:37:01 | 25.625 |
| 7/28/2010 11:03:00 | 23.0 | 3/26/2011 11:13:01 | 25.625 |
| 7/28/2010 11:38:00 | 23.0 | 3/26/2011 11:49:01 | 25.625 |
| 7/28/2010 12:13:00 | 23.0 | 3/26/2011 12:25:01 | 25.625 |
| 7/28/2010 12:48:00 | 23.0 | 3/26/2011 13:01:01 | 25.625 |
| 7/28/2010 13:23:00 | 23.0 | 3/26/2011 13:37:01 | 25.625 |
| 7/28/2010 13:58:00 | 23.0 | 3/26/2011 14:13:01 | 25.625 |
| 7/28/2010 14:33:00 | 23.0 | 3/26/2011 14:49:01 | 25.625 |
| 7/28/2010 15:08:00 | 23.0 | 3/26/2011 15:25:01 | 25.625 |
| 7/28/2010 15:43:00 | 23.0 | 3/26/2011 16:01:01 | 25.625 |
| 7/28/2010 16:18:00 | 23.0 | 3/26/2011 16:37:01 | 25.625 |
| 7/28/2010 16:53:00 | 23.0 | 3/26/2011 17:13:01 | 25.625 |
| 7/28/2010 17:28:00 | 23.0 | 3/26/2011 17:49:01 | 25.625 |
| 7/28/2010 18:03:00 | 23.0 | 3/26/2011 18:25:01 | 25.625 |
| 7/28/2010 18:38:00 | 23.0 | 3/26/2011 19:01:01 | 25.625 |
| 7/28/2010 19:13:00 | 23.0 | 3/26/2011 19:37:01 | 25.625 |
| 7/28/2010 19:48:00 | 23.0 | 3/26/2011 20:13:01 | 25.625 |
| 7/28/2010 20:23:00 | 23.0 | 3/26/2011 20:49:01 | 25.625 |
| 7/28/2010 20:58:00 | 23.0 | 3/26/2011 21:25:01 | 25.625 |
| 7/28/2010 21:33:00 | 23.0 | 3/26/2011 22:01:01 | 25.625 |
| 7/28/2010 22:08:00 | 23.0 | 3/26/2011 22:37:01 | 25.625 |
| 7/28/2010 22:43:00 | 23.5 | 3/26/2011 23:13:01 | 25.625 |
| 7/28/2010 23:18:00 | 23.5 | 3/26/2011 23:49:01 | 25.625 |
| 7/28/2010 23:53:00 | 23.5 | 3/27/2011 00:25:01 | 25.625 |
| 7/29/2010 00:28:00 | 23.5 | 3/27/2011 01:01:01 | 25.625 |
| 7/29/2010 01:03:00 | 23.5 | 3/27/2011 01:37:01 | 25.625 |

|                    |      |                    |        |
|--------------------|------|--------------------|--------|
| 7/29/2010 01:38:00 | 23.5 | 3/27/2011 02:13:01 | 25.625 |
| 7/29/2010 02:13:00 | 23.5 | 3/27/2011 02:49:01 | 25.625 |
| 7/29/2010 02:48:00 | 23.5 | 3/27/2011 03:25:01 | 25.625 |
| 7/29/2010 03:23:00 | 23.5 | 3/27/2011 04:01:01 | 25.625 |
| 7/29/2010 03:58:00 | 23.5 | 3/27/2011 04:37:01 | 25.625 |
| 7/29/2010 04:33:00 | 23.0 | 3/27/2011 05:13:01 | 25.625 |
| 7/29/2010 05:08:00 | 23.0 | 3/27/2011 05:49:01 | 25.625 |
| 7/29/2010 05:43:00 | 23.0 | 3/27/2011 06:25:01 | 25.625 |
| 7/29/2010 06:18:00 | 23.0 | 3/27/2011 07:01:01 | 25.625 |
| 7/29/2010 06:53:00 | 23.0 | 3/27/2011 07:37:01 | 25.625 |
| 7/29/2010 07:28:00 | 23.0 | 3/27/2011 08:13:01 | 25.625 |
| 7/29/2010 08:03:00 | 23.0 | 3/27/2011 08:49:01 | 25.625 |
| 7/29/2010 08:38:00 | 23.0 | 3/27/2011 09:25:01 | 25.625 |
| 7/29/2010 09:13:00 | 23.0 | 3/27/2011 10:01:01 | 25.625 |
| 7/29/2010 09:48:00 | 23.0 | 3/27/2011 10:37:01 | 25.625 |
| 7/29/2010 10:23:00 | 23.0 | 3/27/2011 11:13:01 | 25.625 |
| 7/29/2010 10:58:00 | 23.0 | 3/27/2011 11:49:01 | 25.625 |
| 7/29/2010 11:33:00 | 23.0 | 3/27/2011 12:25:01 | 25.625 |
| 7/29/2010 12:08:00 | 23.0 | 3/27/2011 13:01:01 | 25.625 |
| 7/29/2010 12:43:00 | 23.0 | 3/27/2011 13:37:01 | 25.625 |
| 7/29/2010 13:18:00 | 23.0 | 3/27/2011 14:13:01 | 25.625 |
| 7/29/2010 13:53:00 | 23.0 | 3/27/2011 14:49:01 | 25.625 |
| 7/29/2010 14:28:00 | 23.0 | 3/27/2011 15:25:01 | 25.625 |
| 7/29/2010 15:03:00 | 23.0 | 3/27/2011 16:01:01 | 25.625 |
| 7/29/2010 15:38:00 | 23.0 | 3/27/2011 16:37:01 | 25.625 |
| 7/29/2010 16:13:00 | 23.0 | 3/27/2011 17:13:01 | 25.625 |
| 7/29/2010 16:48:00 | 23.0 | 3/27/2011 17:49:01 | 25.625 |
| 7/29/2010 17:23:00 | 23.0 | 3/27/2011 18:25:01 | 25.625 |
| 7/29/2010 17:58:00 | 23.0 | 3/27/2011 19:01:01 | 25.625 |
| 7/29/2010 18:33:00 | 23.0 | 3/27/2011 19:37:01 | 25.625 |
| 7/29/2010 19:08:00 | 23.0 | 3/27/2011 20:13:01 | 25.625 |
| 7/29/2010 19:43:00 | 23.0 | 3/27/2011 20:49:01 | 25.625 |
| 7/29/2010 20:18:00 | 23.0 | 3/27/2011 21:25:01 | 25.625 |
| 7/29/2010 20:53:00 | 23.0 | 3/27/2011 22:01:01 | 25.625 |
| 7/29/2010 21:28:00 | 23.0 | 3/27/2011 22:37:01 | 25.625 |
| 7/29/2010 22:03:00 | 23.0 | 3/27/2011 23:13:01 | 25.625 |
| 7/29/2010 22:38:00 | 23.0 | 3/27/2011 23:49:01 | 25.625 |
| 7/29/2010 23:13:00 | 23.0 | 3/28/2011 00:25:01 | 25.625 |
| 7/29/2010 23:48:00 | 23.0 | 3/28/2011 01:01:01 | 25.625 |
| 7/30/2010 00:23:00 | 23.0 | 3/28/2011 01:37:01 | 25.625 |
| 7/30/2010 00:58:00 | 23.0 | 3/28/2011 02:13:01 | 25.625 |
| 7/30/2010 01:33:00 | 23.0 | 3/28/2011 02:49:01 | 25.625 |
| 7/30/2010 02:08:00 | 23.0 | 3/28/2011 03:25:01 | 25.625 |
| 7/30/2010 02:43:00 | 23.0 | 3/28/2011 04:01:01 | 25.625 |
| 7/30/2010 03:18:00 | 23.0 | 3/28/2011 04:37:01 | 25.625 |
| 7/30/2010 03:53:00 | 23.0 | 3/28/2011 05:13:01 | 25.625 |
| 7/30/2010 04:28:00 | 23.0 | 3/28/2011 05:49:01 | 25.625 |
| 7/30/2010 05:03:00 | 23.0 | 3/28/2011 06:25:01 | 25.625 |
| 7/30/2010 05:38:00 | 23.0 | 3/28/2011 07:01:01 | 25.625 |
| 7/30/2010 06:13:00 | 23.0 | 3/28/2011 07:37:01 | 25.625 |

|                    |      |                    |        |
|--------------------|------|--------------------|--------|
| 7/30/2010 06:48:00 | 23.0 | 3/28/2011 08:13:01 | 25.625 |
| 7/30/2010 07:23:00 | 23.0 | 3/28/2011 08:49:01 | 25.625 |
| 7/30/2010 07:58:00 | 23.0 | 3/28/2011 09:25:01 | 25.625 |
| 7/30/2010 08:33:00 | 23.0 | 3/28/2011 10:01:01 | 26.125 |
| 7/30/2010 09:08:00 | 23.0 | 3/28/2011 10:37:01 | 25.625 |
| 7/30/2010 09:43:00 | 23.0 | 3/28/2011 11:13:01 | 26.125 |
| 7/30/2010 10:18:00 | 23.0 | 3/28/2011 11:49:01 | 25.625 |
| 7/30/2010 10:53:00 | 23.0 | 3/28/2011 12:25:01 | 25.625 |
| 7/30/2010 11:28:00 | 23.0 | 3/28/2011 13:01:01 | 25.625 |
| 7/30/2010 12:03:00 | 23.0 | 3/28/2011 13:37:01 | 25.625 |
| 7/30/2010 12:38:00 | 23.0 | 3/28/2011 14:13:01 | 25.625 |
| 7/30/2010 13:13:00 | 23.0 | 3/28/2011 14:49:01 | 25.625 |
| 7/30/2010 13:48:00 | 23.0 | 3/28/2011 15:25:01 | 25.625 |
| 7/30/2010 14:23:00 | 23.0 | 3/28/2011 16:01:01 | 25.625 |
| 7/30/2010 14:58:00 | 23.0 | 3/28/2011 16:37:01 | 25.625 |
| 7/30/2010 15:33:00 | 23.0 | 3/28/2011 17:13:01 | 25.625 |
| 7/30/2010 16:08:00 | 23.0 | 3/28/2011 17:49:01 | 25.625 |
| 7/30/2010 16:43:00 | 23.0 | 3/28/2011 18:25:01 | 25.625 |
| 7/30/2010 17:18:00 | 23.0 | 3/28/2011 19:01:01 | 25.625 |
| 7/30/2010 17:53:00 | 23.0 | 3/28/2011 19:37:01 | 25.625 |
| 7/30/2010 18:28:00 | 23.0 | 3/28/2011 20:13:01 | 25.625 |
| 7/30/2010 19:03:00 | 23.0 | 3/28/2011 20:49:01 | 25.625 |
| 7/30/2010 19:38:00 | 23.0 | 3/28/2011 21:25:01 | 25.625 |
| 7/30/2010 20:13:00 | 23.0 | 3/28/2011 22:01:01 | 25.625 |
| 7/30/2010 20:48:00 | 23.0 | 3/28/2011 22:37:01 | 25.625 |
| 7/30/2010 21:23:00 | 23.0 | 3/28/2011 23:13:01 | 25.625 |
| 7/30/2010 21:58:00 | 23.0 | 3/28/2011 23:49:01 | 25.625 |
| 7/30/2010 22:33:00 | 23.0 | 3/29/2011 00:25:01 | 25.625 |
| 7/30/2010 23:08:00 | 23.0 | 3/29/2011 01:01:01 | 25.625 |
| 7/30/2010 23:43:00 | 23.0 | 3/29/2011 01:37:01 | 25.625 |
| 7/31/2010 00:18:00 | 23.0 | 3/29/2011 02:13:01 | 25.625 |
| 7/31/2010 00:53:00 | 23.0 | 3/29/2011 02:49:01 | 25.625 |
| 7/31/2010 01:28:00 | 23.0 | 3/29/2011 03:25:01 | 25.625 |
| 7/31/2010 02:03:00 | 23.0 | 3/29/2011 04:01:01 | 25.625 |
| 7/31/2010 02:38:00 | 23.0 | 3/29/2011 04:37:01 | 25.625 |
| 7/31/2010 03:13:00 | 23.0 | 3/29/2011 05:13:01 | 25.625 |
| 7/31/2010 03:48:00 | 23.0 | 3/29/2011 05:49:01 | 25.625 |
| 7/31/2010 04:23:00 | 23.0 | 3/29/2011 06:25:01 | 25.625 |
| 7/31/2010 04:58:00 | 23.0 | 3/29/2011 07:01:01 | 25.625 |
| 7/31/2010 05:33:00 | 23.0 | 3/29/2011 07:37:01 | 25.625 |
| 7/31/2010 06:08:00 | 23.0 | 3/29/2011 08:13:01 | 25.625 |
| 7/31/2010 06:43:00 | 23.0 | 3/29/2011 08:49:01 | 25.625 |
| 7/31/2010 07:18:00 | 23.0 | 3/29/2011 09:25:01 | 25.625 |
| 7/31/2010 07:53:00 | 23.0 | 3/29/2011 10:01:01 | 25.625 |
| 7/31/2010 08:28:00 | 23.0 | 3/29/2011 10:37:01 | 25.625 |
| 7/31/2010 09:03:00 | 23.0 | 3/29/2011 11:13:01 | 25.625 |
| 7/31/2010 09:38:00 | 23.0 | 3/29/2011 11:49:01 | 25.625 |
| 7/31/2010 10:13:00 | 23.0 | 3/29/2011 12:25:01 | 25.625 |
| 7/31/2010 10:48:00 | 23.0 | 3/29/2011 13:01:01 | 25.625 |
| 7/31/2010 11:23:00 | 23.0 | 3/29/2011 13:37:01 | 25.625 |

|                    |      |                    |        |
|--------------------|------|--------------------|--------|
| 7/31/2010 11:58:00 | 23.0 | 3/29/2011 14:13:01 | 25.625 |
| 7/31/2010 12:33:00 | 23.0 | 3/29/2011 14:49:01 | 25.625 |
| 7/31/2010 13:08:00 | 23.0 | 3/29/2011 15:25:01 | 25.625 |
| 7/31/2010 13:43:00 | 23.0 | 3/29/2011 16:01:01 | 25.625 |
| 7/31/2010 14:18:00 | 23.0 | 3/29/2011 16:37:01 | 25.625 |
| 7/31/2010 14:53:00 | 23.0 | 3/29/2011 17:13:01 | 25.625 |
| 7/31/2010 15:28:00 | 23.0 | 3/29/2011 17:49:01 | 25.625 |
| 7/31/2010 16:03:00 | 23.0 | 3/29/2011 18:25:01 | 25.625 |
| 7/31/2010 16:38:00 | 23.0 | 3/29/2011 19:01:01 | 25.625 |
| 7/31/2010 17:13:00 | 23.0 | 3/29/2011 19:37:01 | 25.625 |
| 7/31/2010 17:48:00 | 23.0 | 3/29/2011 20:13:01 | 25.625 |
| 7/31/2010 18:23:00 | 23.0 | 3/29/2011 20:49:01 | 25.625 |
| 7/31/2010 18:58:00 | 23.0 | 3/29/2011 21:25:01 | 25.625 |
| 7/31/2010 19:33:00 | 23.0 | 3/29/2011 22:01:01 | 25.625 |
| 7/31/2010 20:08:00 | 23.0 | 3/29/2011 22:37:01 | 25.625 |
| 7/31/2010 20:43:00 | 23.0 | 3/29/2011 23:13:01 | 25.625 |
| 7/31/2010 21:18:00 | 23.0 | 3/29/2011 23:49:01 | 25.625 |
| 7/31/2010 21:53:00 | 23.0 | 3/30/2011 00:25:01 | 25.625 |
| 7/31/2010 22:28:00 | 23.0 | 3/30/2011 01:01:01 | 25.625 |
| 7/31/2010 23:03:00 | 23.0 | 3/30/2011 01:37:01 | 25.625 |
| 7/31/2010 23:38:00 | 23.0 | 3/30/2011 02:13:01 | 25.625 |
| 8/1/2010 00:13:00  | 23.0 | 3/30/2011 02:49:01 | 25.625 |
| 8/1/2010 00:48:00  | 23.0 | 3/30/2011 03:25:01 | 25.625 |
| 8/1/2010 01:23:00  | 23.0 | 3/30/2011 04:01:01 | 25.625 |
| 8/1/2010 01:58:00  | 23.0 | 3/30/2011 04:37:01 | 25.625 |
| 8/1/2010 02:33:00  | 23.0 | 3/30/2011 05:13:01 | 25.625 |
| 8/1/2010 03:08:00  | 23.0 | 3/30/2011 05:49:01 | 25.625 |
| 8/1/2010 03:43:00  | 23.0 | 3/30/2011 06:25:01 | 25.625 |
| 8/1/2010 04:18:00  | 23.0 | 3/30/2011 07:01:01 | 25.625 |
| 8/1/2010 04:53:00  | 23.0 | 3/30/2011 07:37:01 | 25.625 |
| 8/1/2010 05:28:00  | 23.0 | 3/30/2011 08:13:01 | 25.625 |
| 8/1/2010 06:03:00  | 23.0 | 3/30/2011 08:49:01 | 25.625 |
| 8/1/2010 06:38:00  | 23.0 | 3/30/2011 09:25:01 | 25.625 |
| 8/1/2010 07:13:00  | 23.0 | 3/30/2011 10:01:01 | 25.625 |
| 8/1/2010 07:48:00  | 23.0 | 3/30/2011 10:37:01 | 25.625 |
| 8/1/2010 08:23:00  | 23.0 | 3/30/2011 11:13:01 | 25.625 |
| 8/1/2010 08:58:00  | 23.0 | 3/30/2011 11:49:01 | 25.625 |
| 8/1/2010 09:33:00  | 23.0 | 3/30/2011 12:25:01 | 25.625 |
| 8/1/2010 10:08:00  | 23.0 | 3/30/2011 13:01:01 | 25.625 |
| 8/1/2010 10:43:00  | 23.0 | 3/30/2011 13:37:01 | 25.625 |
| 8/1/2010 11:18:00  | 23.0 | 3/30/2011 14:13:01 | 25.625 |
| 8/1/2010 11:53:00  | 23.0 | 3/30/2011 14:49:01 | 25.625 |
| 8/1/2010 12:28:00  | 23.0 | 3/30/2011 15:25:01 | 25.625 |
| 8/1/2010 13:03:00  | 23.0 | 3/30/2011 16:01:01 | 25.625 |
| 8/1/2010 13:38:00  | 23.0 | 3/30/2011 16:37:01 | 25.625 |
| 8/1/2010 14:13:00  | 23.0 | 3/30/2011 17:13:01 | 25.625 |
| 8/1/2010 14:48:00  | 23.0 | 3/30/2011 17:49:01 | 25.625 |
| 8/1/2010 15:23:00  | 23.0 | 3/30/2011 18:25:01 | 25.625 |
| 8/1/2010 15:58:00  | 23.0 | 3/30/2011 19:01:01 | 25.625 |
| 8/1/2010 16:33:00  | 23.0 | 3/30/2011 19:37:01 | 25.625 |

|                   |      |                    |        |
|-------------------|------|--------------------|--------|
| 8/1/2010 17:08:00 | 23.0 | 3/30/2011 20:13:01 | 25.625 |
| 8/1/2010 17:43:00 | 23.0 | 3/30/2011 20:49:01 | 25.625 |
| 8/1/2010 18:18:00 | 23.0 | 3/30/2011 21:25:01 | 25.625 |
| 8/1/2010 18:53:00 | 23.0 | 3/30/2011 22:01:01 | 25.625 |
| 8/1/2010 19:28:00 | 23.0 | 3/30/2011 22:37:01 | 25.625 |
| 8/1/2010 20:03:00 | 23.0 | 3/30/2011 23:13:01 | 25.625 |
| 8/1/2010 20:38:00 | 23.0 | 3/30/2011 23:49:01 | 25.625 |
| 8/1/2010 21:13:00 | 23.0 | 3/31/2011 00:25:01 | 25.625 |
| 8/1/2010 21:48:00 | 23.0 | 3/31/2011 01:01:01 | 25.625 |
| 8/1/2010 22:23:00 | 23.0 | 3/31/2011 01:37:01 | 25.625 |
| 8/1/2010 22:58:00 | 23.0 | 3/31/2011 02:13:01 | 25.625 |
| 8/1/2010 23:33:00 | 23.0 | 3/31/2011 02:49:01 | 25.625 |
| 8/2/2010 00:08:00 | 23.0 | 3/31/2011 03:25:01 | 25.625 |
| 8/2/2010 00:43:00 | 23.0 | 3/31/2011 04:01:01 | 25.625 |
| 8/2/2010 01:18:00 | 23.0 | 3/31/2011 04:37:01 | 25.625 |
| 8/2/2010 01:53:00 | 23.0 | 3/31/2011 05:13:01 | 25.625 |
| 8/2/2010 02:28:00 | 23.0 | 3/31/2011 05:49:01 | 25.625 |
| 8/2/2010 03:03:00 | 23.0 | 3/31/2011 06:25:01 | 25.625 |
| 8/2/2010 03:38:00 | 23.0 | 3/31/2011 07:01:01 | 25.625 |
| 8/2/2010 04:13:00 | 23.0 | 3/31/2011 07:37:01 | 25.625 |
| 8/2/2010 04:48:00 | 23.0 | 3/31/2011 08:13:01 | 25.625 |
| 8/2/2010 05:23:00 | 23.0 | 3/31/2011 08:49:01 | 25.625 |
| 8/2/2010 05:58:00 | 23.0 | 3/31/2011 09:25:01 | 25.625 |
| 8/2/2010 06:33:00 | 23.0 | 3/31/2011 10:01:01 | 25.625 |
| 8/2/2010 07:08:00 | 23.0 | 3/31/2011 10:37:01 | 25.625 |
| 8/2/2010 07:43:00 | 23.0 | 3/31/2011 11:13:01 | 25.625 |
| 8/2/2010 08:18:00 | 23.0 | 3/31/2011 11:49:01 | 25.625 |
| 8/2/2010 08:53:00 | 23.0 | 3/31/2011 12:25:01 | 25.625 |
| 8/2/2010 09:28:00 | 23.0 | 3/31/2011 13:01:01 | 25.625 |
| 8/2/2010 10:03:00 | 23.0 | 3/31/2011 13:37:01 | 25.625 |
| 8/2/2010 10:38:00 | 23.0 | 3/31/2011 14:13:01 | 25.625 |
| 8/2/2010 11:13:00 | 23.0 | 3/31/2011 14:49:01 | 25.625 |
| 8/2/2010 11:48:00 | 23.0 | 3/31/2011 15:25:01 | 25.625 |
| 8/2/2010 12:23:00 | 23.0 | 3/31/2011 16:01:01 | 25.625 |
| 8/2/2010 12:58:00 | 23.0 | 3/31/2011 16:37:01 | 25.625 |
| 8/2/2010 13:33:00 | 23.0 | 3/31/2011 17:13:01 | 25.625 |
| 8/2/2010 14:08:00 | 23.0 | 3/31/2011 17:49:01 | 25.625 |
| 8/2/2010 14:43:00 | 23.0 | 3/31/2011 18:25:01 | 25.625 |
| 8/2/2010 15:18:00 | 23.0 | 3/31/2011 19:01:01 | 25.625 |
| 8/2/2010 15:53:00 | 23.0 | 3/31/2011 19:37:01 | 25.625 |
| 8/2/2010 16:28:00 | 23.0 | 3/31/2011 20:13:01 | 25.625 |
| 8/2/2010 17:03:00 | 23.0 | 3/31/2011 20:49:01 | 25.625 |
| 8/2/2010 17:38:00 | 23.0 | 3/31/2011 21:25:01 | 25.625 |
| 8/2/2010 18:13:00 | 23.0 | 3/31/2011 22:01:01 | 25.625 |
| 8/2/2010 18:48:00 | 23.0 | 3/31/2011 22:37:01 | 25.625 |
| 8/2/2010 19:23:00 | 23.0 | 3/31/2011 23:13:01 | 25.625 |
| 8/2/2010 19:58:00 | 23.0 | 3/31/2011 23:49:01 | 25.625 |
| 8/2/2010 20:33:00 | 23.0 | 4/1/2011 00:25:01  | 25.625 |
| 8/2/2010 21:08:00 | 23.0 | 4/1/2011 01:01:01  | 25.625 |
| 8/2/2010 21:43:00 | 23.0 | 4/1/2011 01:37:01  | 25.625 |



|                   |      |                   |        |
|-------------------|------|-------------------|--------|
| 8/2/2010 22:18:00 | 23.0 | 4/1/2011 02:13:01 | 25.625 |
| 8/2/2010 22:53:00 | 23.0 | 4/1/2011 02:49:01 | 25.625 |
| 8/2/2010 23:28:00 | 23.0 | 4/1/2011 03:25:01 | 25.625 |
| 8/3/2010 00:03:00 | 23.0 | 4/1/2011 04:01:01 | 25.625 |
| 8/3/2010 00:38:00 | 23.0 | 4/1/2011 04:37:01 | 25.625 |
| 8/3/2010 01:13:00 | 23.0 | 4/1/2011 05:13:01 | 25.625 |
| 8/3/2010 01:48:00 | 23.0 | 4/1/2011 05:49:01 | 25.625 |
| 8/3/2010 02:23:00 | 23.0 | 4/1/2011 06:25:01 | 25.625 |
| 8/3/2010 02:58:00 | 23.0 | 4/1/2011 07:01:01 | 25.625 |
| 8/3/2010 03:33:00 | 23.0 | 4/1/2011 07:37:01 | 25.625 |
| 8/3/2010 04:08:00 | 23.0 | 4/1/2011 08:13:01 | 25.625 |
| 8/3/2010 04:43:00 | 23.0 | 4/1/2011 08:49:01 | 25.625 |
| 8/3/2010 05:18:00 | 23.0 | 4/1/2011 09:25:01 | 25.625 |
| 8/3/2010 05:53:00 | 23.0 | 4/1/2011 10:01:01 | 25.625 |
| 8/3/2010 06:28:00 | 23.0 | 4/1/2011 10:37:01 | 25.625 |
| 8/3/2010 07:03:00 | 23.0 | 4/1/2011 11:13:01 | 25.625 |
| 8/3/2010 07:38:00 | 23.0 | 4/1/2011 11:49:01 | 25.625 |
| 8/3/2010 08:13:00 | 23.0 | 4/1/2011 12:25:01 | 25.625 |
| 8/3/2010 08:48:00 | 23.0 | 4/1/2011 13:01:01 | 25.625 |
| 8/3/2010 09:23:00 | 23.0 | 4/1/2011 13:37:01 | 25.625 |
| 8/3/2010 09:58:00 | 23.0 | 4/1/2011 14:13:01 | 25.625 |
| 8/3/2010 10:33:00 | 23.0 | 4/1/2011 14:49:01 | 25.625 |
| 8/3/2010 11:08:00 | 23.0 | 4/1/2011 15:25:01 | 25.625 |
| 8/3/2010 11:43:00 | 23.0 | 4/1/2011 16:01:01 | 25.625 |
| 8/3/2010 12:18:00 | 23.0 | 4/1/2011 16:37:01 | 25.625 |
| 8/3/2010 12:53:00 | 23.0 | 4/1/2011 17:13:01 | 25.625 |
| 8/3/2010 13:28:00 | 23.0 | 4/1/2011 17:49:01 | 25.625 |
| 8/3/2010 14:03:00 | 23.0 | 4/1/2011 18:25:01 | 25.625 |
| 8/3/2010 14:38:00 | 23.0 | 4/1/2011 19:01:01 | 25.625 |
| 8/3/2010 15:13:00 | 23.0 | 4/1/2011 19:37:01 | 25.625 |
| 8/3/2010 15:48:00 | 23.0 | 4/1/2011 20:13:01 | 25.625 |
| 8/3/2010 16:23:00 | 23.0 | 4/1/2011 20:49:01 | 25.625 |
| 8/3/2010 16:58:00 | 23.0 | 4/1/2011 21:25:01 | 25.625 |
| 8/3/2010 17:33:00 | 23.0 | 4/1/2011 22:01:01 | 25.625 |
| 8/3/2010 18:08:00 | 23.0 | 4/1/2011 22:37:01 | 25.625 |
| 8/3/2010 18:43:00 | 23.0 | 4/1/2011 23:13:01 | 25.625 |
| 8/3/2010 19:18:00 | 23.0 | 4/1/2011 23:49:01 | 25.625 |
| 8/3/2010 19:53:00 | 23.0 | 4/2/2011 00:25:01 | 25.625 |
| 8/3/2010 20:28:00 | 23.0 | 4/2/2011 01:01:01 | 25.625 |
| 8/3/2010 21:03:00 | 23.0 | 4/2/2011 01:37:01 | 25.625 |
| 8/3/2010 21:38:00 | 23.0 | 4/2/2011 02:13:01 | 25.625 |
| 8/3/2010 22:13:00 | 23.0 | 4/2/2011 02:49:01 | 25.625 |
| 8/3/2010 22:48:00 | 23.0 | 4/2/2011 03:25:01 | 25.625 |
| 8/3/2010 23:23:00 | 23.0 | 4/2/2011 04:01:01 | 25.625 |
| 8/3/2010 23:58:00 | 23.0 | 4/2/2011 04:37:01 | 25.625 |
| 8/4/2010 00:33:00 | 23.0 | 4/2/2011 05:13:01 | 25.625 |
| 8/4/2010 01:08:00 | 23.0 | 4/2/2011 05:49:01 | 25.625 |
| 8/4/2010 01:43:00 | 23.0 | 4/2/2011 06:25:01 | 25.625 |
| 8/4/2010 02:18:00 | 23.0 | 4/2/2011 07:01:01 | 25.625 |
| 8/4/2010 02:53:00 | 23.0 | 4/2/2011 07:37:01 | 25.625 |

|                   |      |                   |        |
|-------------------|------|-------------------|--------|
| 8/4/2010 03:28:00 | 23.0 | 4/2/2011 08:13:01 | 25.625 |
| 8/4/2010 04:03:00 | 23.0 | 4/2/2011 08:49:01 | 25.625 |
| 8/4/2010 04:38:00 | 23.0 | 4/2/2011 09:25:01 | 25.625 |
| 8/4/2010 05:13:00 | 23.0 | 4/2/2011 10:01:01 | 25.625 |
| 8/4/2010 05:48:00 | 23.0 | 4/2/2011 10:37:01 | 25.625 |
| 8/4/2010 06:23:00 | 23.0 | 4/2/2011 11:13:01 | 25.625 |
| 8/4/2010 06:58:00 | 23.0 | 4/2/2011 11:49:01 | 25.625 |
| 8/4/2010 07:33:00 | 23.0 | 4/2/2011 12:25:01 | 25.625 |
| 8/4/2010 08:08:00 | 23.0 | 4/2/2011 13:01:01 | 25.625 |
| 8/4/2010 08:43:00 | 23.0 | 4/2/2011 13:37:01 | 25.625 |
| 8/4/2010 09:18:00 | 23.0 | 4/2/2011 14:13:01 | 25.625 |
| 8/4/2010 09:53:00 | 23.0 | 4/2/2011 14:49:01 | 25.625 |
| 8/4/2010 10:28:00 | 23.0 | 4/2/2011 15:25:01 | 25.625 |
| 8/4/2010 11:03:00 | 23.0 | 4/2/2011 16:01:01 | 25.625 |
| 8/4/2010 11:38:00 | 23.0 | 4/2/2011 16:37:01 | 25.625 |
| 8/4/2010 12:13:00 | 22.5 | 4/2/2011 17:13:01 | 25.625 |
| 8/4/2010 12:48:00 | 23.0 | 4/2/2011 17:49:01 | 25.625 |
| 8/4/2010 13:23:00 | 22.5 | 4/2/2011 18:25:01 | 25.625 |
| 8/4/2010 13:58:00 | 23.0 | 4/2/2011 19:01:01 | 25.625 |
| 8/4/2010 14:33:00 | 23.0 | 4/2/2011 19:37:01 | 25.625 |
| 8/4/2010 15:08:00 | 23.0 | 4/2/2011 20:13:01 | 25.625 |
| 8/4/2010 15:43:00 | 23.0 | 4/2/2011 20:49:01 | 25.625 |
| 8/4/2010 16:18:00 | 23.0 | 4/2/2011 21:25:01 | 25.625 |
| 8/4/2010 16:53:00 | 23.0 | 4/2/2011 22:01:01 | 25.625 |
| 8/4/2010 17:28:00 | 23.0 | 4/2/2011 22:37:01 | 25.625 |
| 8/4/2010 18:03:00 | 23.0 | 4/2/2011 23:13:01 | 25.625 |
| 8/4/2010 18:38:00 | 23.0 | 4/2/2011 23:49:01 | 25.625 |
| 8/4/2010 19:13:00 | 23.0 | 4/3/2011 00:25:01 | 25.625 |
| 8/4/2010 19:48:00 | 23.0 | 4/3/2011 01:01:01 | 25.625 |
| 8/4/2010 20:23:00 | 23.0 | 4/3/2011 01:37:01 | 25.625 |
| 8/4/2010 20:58:00 | 23.0 | 4/3/2011 02:13:01 | 25.625 |
| 8/4/2010 21:33:00 | 23.0 | 4/3/2011 02:49:01 | 25.625 |
| 8/4/2010 22:08:00 | 23.0 | 4/3/2011 03:25:01 | 25.625 |
| 8/4/2010 22:43:00 | 23.0 | 4/3/2011 04:01:01 | 25.625 |
| 8/4/2010 23:18:00 | 23.0 | 4/3/2011 04:37:01 | 25.625 |
| 8/4/2010 23:53:00 | 23.0 | 4/3/2011 05:13:01 | 25.625 |
| 8/5/2010 00:28:00 | 23.0 | 4/3/2011 05:49:01 | 25.625 |
| 8/5/2010 01:03:00 | 23.0 | 4/3/2011 06:25:01 | 25.625 |
| 8/5/2010 01:38:00 | 23.0 | 4/3/2011 07:01:01 | 25.625 |
| 8/5/2010 02:13:00 | 23.0 | 4/3/2011 07:37:01 | 25.625 |
| 8/5/2010 02:48:00 | 23.0 | 4/3/2011 08:13:01 | 25.625 |
| 8/5/2010 03:23:00 | 23.0 | 4/3/2011 08:49:01 | 25.625 |
| 8/5/2010 03:58:00 | 23.0 | 4/3/2011 09:25:01 | 25.625 |
| 8/5/2010 04:33:00 | 23.0 | 4/3/2011 10:01:01 | 25.625 |
| 8/5/2010 05:08:00 | 23.0 | 4/3/2011 10:37:01 | 25.625 |
| 8/5/2010 05:43:00 | 23.0 | 4/3/2011 11:13:01 | 25.625 |
| 8/5/2010 06:18:00 | 23.0 | 4/3/2011 11:49:01 | 25.625 |
| 8/5/2010 06:53:00 | 23.0 | 4/3/2011 12:25:01 | 25.625 |
| 8/5/2010 07:28:00 | 23.0 | 4/3/2011 13:01:01 | 25.625 |
| 8/5/2010 08:03:00 | 23.0 | 4/3/2011 13:37:01 | 25.625 |

|                   |      |                   |        |
|-------------------|------|-------------------|--------|
| 8/5/2010 08:38:00 | 23.0 | 4/3/2011 14:13:01 | 25.625 |
| 8/5/2010 09:13:00 | 23.0 | 4/3/2011 14:49:01 | 25.625 |
| 8/5/2010 09:48:00 | 23.0 | 4/3/2011 15:25:01 | 25.625 |
| 8/5/2010 10:23:00 | 23.0 | 4/3/2011 16:01:01 | 25.625 |
| 8/5/2010 10:58:00 | 23.0 | 4/3/2011 16:37:01 | 25.625 |
| 8/5/2010 11:33:00 | 22.5 | 4/3/2011 17:13:01 | 25.625 |
| 8/5/2010 12:08:00 | 22.5 | 4/3/2011 17:49:01 | 25.625 |
| 8/5/2010 12:43:00 | 23.0 | 4/3/2011 18:25:01 | 25.625 |
| 8/5/2010 13:18:00 | 23.0 | 4/3/2011 19:01:01 | 25.625 |
| 8/5/2010 13:53:00 | 23.0 | 4/3/2011 19:37:01 | 25.625 |
| 8/5/2010 14:28:00 | 23.0 | 4/3/2011 20:13:01 | 25.625 |
| 8/5/2010 15:03:00 | 23.0 | 4/3/2011 20:49:01 | 25.625 |
| 8/5/2010 15:38:00 | 23.0 | 4/3/2011 21:25:01 | 25.625 |
| 8/5/2010 16:13:00 | 23.0 | 4/3/2011 22:01:01 | 25.625 |
| 8/5/2010 16:48:00 | 23.0 | 4/3/2011 22:37:01 | 25.625 |
| 8/5/2010 17:23:00 | 23.0 | 4/3/2011 23:13:01 | 25.625 |
| 8/5/2010 17:58:00 | 23.0 | 4/3/2011 23:49:01 | 25.625 |
| 8/5/2010 18:33:00 | 23.0 | 4/4/2011 00:25:01 | 26.125 |
| 8/5/2010 19:08:00 | 23.0 | 4/4/2011 01:01:01 | 26.125 |
| 8/5/2010 19:43:00 | 23.0 | 4/4/2011 01:37:01 | 26.125 |
| 8/5/2010 20:18:00 | 23.0 | 4/4/2011 02:13:01 | 26.125 |
| 8/5/2010 20:53:00 | 23.0 | 4/4/2011 02:49:01 | 26.125 |
| 8/5/2010 21:28:00 | 23.0 | 4/4/2011 03:25:01 | 25.625 |
| 8/5/2010 22:03:00 | 23.0 | 4/4/2011 04:01:01 | 25.625 |
| 8/5/2010 22:38:00 | 23.0 | 4/4/2011 04:37:01 | 25.625 |
| 8/5/2010 23:13:00 | 23.0 | 4/4/2011 05:13:01 | 25.625 |
| 8/5/2010 23:48:00 | 23.0 | 4/4/2011 05:49:01 | 25.625 |
| 8/6/2010 00:23:00 | 23.0 | 4/4/2011 06:25:01 | 25.625 |
| 8/6/2010 00:58:00 | 23.0 | 4/4/2011 07:01:01 | 25.625 |
| 8/6/2010 01:33:00 | 23.0 | 4/4/2011 07:37:01 | 25.625 |
| 8/6/2010 02:08:00 | 23.0 | 4/4/2011 08:13:01 | 25.625 |
| 8/6/2010 02:43:00 | 23.0 | 4/4/2011 08:49:01 | 25.625 |
| 8/6/2010 03:18:00 | 23.0 | 4/4/2011 09:25:01 | 25.625 |
| 8/6/2010 03:53:00 | 23.0 | 4/4/2011 10:01:01 | 25.625 |
| 8/6/2010 04:28:00 | 23.0 | 4/4/2011 10:37:01 | 25.625 |
| 8/6/2010 05:03:00 | 23.0 | 4/4/2011 11:13:01 | 25.625 |
| 8/6/2010 05:38:00 | 23.0 | 4/4/2011 11:49:01 | 25.625 |
| 8/6/2010 06:13:00 | 23.0 | 4/4/2011 12:25:01 | 25.625 |
| 8/6/2010 06:48:00 | 23.0 | 4/4/2011 13:01:01 | 25.625 |
| 8/6/2010 07:23:00 | 22.5 | 4/4/2011 13:37:01 | 25.625 |
| 8/6/2010 07:58:00 | 22.5 | 4/4/2011 14:13:01 | 25.625 |
| 8/6/2010 08:33:00 | 22.5 | 4/4/2011 14:49:01 | 25.625 |
| 8/6/2010 09:08:00 | 22.5 | 4/4/2011 15:25:01 | 25.625 |
| 8/6/2010 09:43:00 | 22.5 | 4/4/2011 16:01:01 | 25.625 |
| 8/6/2010 10:18:00 | 22.5 | 4/4/2011 16:37:01 | 25.625 |
| 8/6/2010 10:53:00 | 22.5 | 4/4/2011 17:13:01 | 25.625 |
| 8/6/2010 11:28:00 | 22.5 | 4/4/2011 17:49:01 | 25.625 |
| 8/6/2010 12:03:00 | 22.5 | 4/4/2011 18:25:01 | 25.625 |
| 8/6/2010 12:38:00 | 22.5 | 4/4/2011 19:01:01 | 25.625 |
| 8/6/2010 13:13:00 | 22.5 | 4/4/2011 19:37:01 | 25.625 |

|                   |      |                   |        |
|-------------------|------|-------------------|--------|
| 8/6/2010 13:48:00 | 22.5 | 4/4/2011 20:13:01 | 25.625 |
| 8/6/2010 14:23:00 | 22.5 | 4/4/2011 20:49:01 | 25.625 |
| 8/6/2010 14:58:00 | 22.5 | 4/4/2011 21:25:01 | 25.625 |
| 8/6/2010 15:33:00 | 22.5 | 4/4/2011 22:01:01 | 25.625 |
| 8/6/2010 16:08:00 | 22.5 | 4/4/2011 22:37:01 | 25.625 |
| 8/6/2010 16:43:00 | 23.0 | 4/4/2011 23:13:01 | 25.625 |
| 8/6/2010 17:18:00 | 23.0 | 4/4/2011 23:49:01 | 25.625 |
| 8/6/2010 17:53:00 | 23.0 | 4/5/2011 00:25:01 | 25.625 |
| 8/6/2010 18:28:00 | 23.0 | 4/5/2011 01:01:01 | 25.625 |
| 8/6/2010 19:03:00 | 23.0 | 4/5/2011 01:37:01 | 25.625 |
| 8/6/2010 19:38:00 | 23.0 | 4/5/2011 02:13:01 | 25.625 |
| 8/6/2010 20:13:00 | 23.0 | 4/5/2011 02:49:01 | 25.625 |
| 8/6/2010 20:48:00 | 23.0 | 4/5/2011 03:25:01 | 25.126 |
| 8/6/2010 21:23:00 | 23.0 | 4/5/2011 04:01:01 | 25.126 |
| 8/6/2010 21:58:00 | 23.0 | 4/5/2011 04:37:01 | 25.126 |
| 8/6/2010 22:33:00 | 23.0 | 4/5/2011 05:13:01 | 25.126 |
| 8/6/2010 23:08:00 | 23.0 | 4/5/2011 05:49:01 | 25.126 |
| 8/6/2010 23:43:00 | 23.0 | 4/5/2011 06:25:01 | 25.126 |
| 8/7/2010 00:18:00 | 23.0 | 4/5/2011 07:01:01 | 25.625 |
| 8/7/2010 00:53:00 | 23.5 | 4/5/2011 07:37:01 | 25.126 |
| 8/7/2010 01:28:00 | 23.0 | 4/5/2011 08:13:01 | 25.126 |
| 8/7/2010 02:03:00 | 23.0 | 4/5/2011 08:49:01 | 25.625 |
| 8/7/2010 02:38:00 | 23.0 | 4/5/2011 09:25:01 | 25.126 |
| 8/7/2010 03:13:00 | 23.0 | 4/5/2011 10:01:01 | 25.126 |
| 8/7/2010 03:48:00 | 23.0 | 4/5/2011 10:37:01 | 25.126 |
| 8/7/2010 04:23:00 | 23.0 | 4/5/2011 11:13:01 | 25.126 |
| 8/7/2010 04:58:00 | 23.0 | 4/5/2011 11:49:01 | 25.126 |
| 8/7/2010 05:33:00 | 23.0 | 4/5/2011 12:25:01 | 25.126 |
| 8/7/2010 06:08:00 | 23.0 | 4/5/2011 13:01:01 | 25.126 |
| 8/7/2010 06:43:00 | 23.0 | 4/5/2011 13:37:01 | 25.126 |
| 8/7/2010 07:18:00 | 23.0 | 4/5/2011 14:13:01 | 25.126 |
| 8/7/2010 07:53:00 | 23.0 | 4/5/2011 14:49:01 | 25.126 |
| 8/7/2010 08:28:00 | 23.0 | 4/5/2011 15:25:01 | 25.126 |
| 8/7/2010 09:03:00 | 23.0 | 4/5/2011 16:01:01 | 25.126 |
| 8/7/2010 09:38:00 | 23.0 | 4/5/2011 16:37:01 | 25.126 |
| 8/7/2010 10:13:00 | 23.0 | 4/5/2011 17:13:01 | 25.126 |
| 8/7/2010 10:48:00 | 23.0 | 4/5/2011 17:49:01 | 25.126 |
| 8/7/2010 11:23:00 | 23.0 | 4/5/2011 18:25:01 | 25.126 |
| 8/7/2010 11:58:00 | 23.0 | 4/5/2011 19:01:01 | 25.126 |
| 8/7/2010 12:33:00 | 23.0 | 4/5/2011 19:37:01 | 25.126 |
| 8/7/2010 13:08:00 | 23.0 | 4/5/2011 20:13:01 | 25.126 |
| 8/7/2010 13:43:00 | 23.0 | 4/5/2011 20:49:01 | 25.126 |
| 8/7/2010 14:18:00 | 23.0 | 4/5/2011 21:25:01 | 25.126 |
| 8/7/2010 14:53:00 | 23.0 | 4/5/2011 22:01:01 | 25.625 |
| 8/7/2010 15:28:00 | 23.0 | 4/5/2011 22:37:01 | 25.625 |
| 8/7/2010 16:03:00 | 23.0 | 4/5/2011 23:13:01 | 25.625 |
| 8/7/2010 16:38:00 | 23.0 | 4/5/2011 23:49:01 | 25.625 |
| 8/7/2010 17:13:00 | 23.0 | 4/6/2011 00:25:01 | 25.625 |
| 8/7/2010 17:48:00 | 23.0 | 4/6/2011 01:01:01 | 25.625 |
| 8/7/2010 18:23:00 | 23.0 | 4/6/2011 01:37:01 | 25.625 |

|                   |      |                   |        |
|-------------------|------|-------------------|--------|
| 8/7/2010 18:58:00 | 23.0 | 4/6/2011 02:13:01 | 25.625 |
| 8/7/2010 19:33:00 | 23.0 | 4/6/2011 02:49:01 | 25.625 |
| 8/7/2010 20:08:00 | 23.0 | 4/6/2011 03:25:01 | 25.625 |
| 8/7/2010 20:43:00 | 23.0 | 4/6/2011 04:01:01 | 25.625 |
| 8/7/2010 21:18:00 | 23.0 | 4/6/2011 04:37:01 | 25.625 |
| 8/7/2010 21:53:00 | 23.0 | 4/6/2011 05:13:01 | 25.625 |
| 8/7/2010 22:28:00 | 23.0 | 4/6/2011 05:49:01 | 25.625 |
| 8/7/2010 23:03:00 | 23.5 | 4/6/2011 06:25:01 | 25.625 |
| 8/7/2010 23:38:00 | 23.5 | 4/6/2011 07:01:01 | 25.625 |
| 8/8/2010 00:13:00 | 23.5 | 4/6/2011 07:37:01 | 25.625 |
| 8/8/2010 00:48:00 | 23.5 | 4/6/2011 08:13:01 | 25.625 |
| 8/8/2010 01:23:00 | 23.5 | 4/6/2011 08:49:01 | 25.625 |
| 8/8/2010 01:58:00 | 23.5 | 4/6/2011 09:25:01 | 25.625 |
| 8/8/2010 02:33:00 | 23.5 | 4/6/2011 10:01:01 | 25.126 |
| 8/8/2010 03:08:00 | 23.0 | 4/6/2011 10:37:01 | 25.126 |
| 8/8/2010 03:43:00 | 23.0 | 4/6/2011 11:13:01 | 25.126 |
| 8/8/2010 04:18:00 | 23.0 | 4/6/2011 11:49:01 | 25.126 |
| 8/8/2010 04:53:00 | 23.0 | 4/6/2011 12:25:01 | 25.126 |
| 8/8/2010 05:28:00 | 23.0 | 4/6/2011 13:01:01 | 25.126 |
| 8/8/2010 06:03:00 | 23.0 | 4/6/2011 13:37:01 | 25.625 |
| 8/8/2010 06:38:00 | 23.0 | 4/6/2011 14:13:01 | 25.625 |
| 8/8/2010 07:13:00 | 23.0 | 4/6/2011 14:49:01 | 25.625 |
| 8/8/2010 07:48:00 | 23.0 | 4/6/2011 15:25:01 | 25.625 |
| 8/8/2010 08:23:00 | 23.0 | 4/6/2011 16:01:01 | 25.625 |
| 8/8/2010 08:58:00 | 23.0 | 4/6/2011 16:37:01 | 25.625 |
| 8/8/2010 09:33:00 | 23.0 | 4/6/2011 17:13:01 | 25.625 |
| 8/8/2010 10:08:00 | 23.0 | 4/6/2011 17:49:01 | 25.625 |
| 8/8/2010 10:43:00 | 23.0 | 4/6/2011 18:25:01 | 25.625 |
| 8/8/2010 11:18:00 | 23.0 | 4/6/2011 19:01:01 | 25.625 |
| 8/8/2010 11:53:00 | 23.0 | 4/6/2011 19:37:01 | 25.625 |
| 8/8/2010 12:28:00 | 23.0 | 4/6/2011 20:13:01 | 25.625 |
| 8/8/2010 13:03:00 | 23.0 | 4/6/2011 20:49:01 | 25.625 |
| 8/8/2010 13:38:00 | 23.0 | 4/6/2011 21:25:01 | 25.625 |
| 8/8/2010 14:13:00 | 23.0 | 4/6/2011 22:01:01 | 25.625 |
| 8/8/2010 14:48:00 | 23.0 | 4/6/2011 22:37:01 | 25.625 |
| 8/8/2010 15:23:00 | 23.0 | 4/6/2011 23:13:01 | 25.625 |
| 8/8/2010 15:58:00 | 23.0 | 4/6/2011 23:49:01 | 25.625 |
| 8/8/2010 16:33:00 | 23.0 | 4/7/2011 00:25:01 | 25.625 |
| 8/8/2010 17:08:00 | 23.5 | 4/7/2011 01:01:01 | 25.625 |
| 8/8/2010 17:43:00 | 23.5 | 4/7/2011 01:37:01 | 25.625 |
| 8/8/2010 18:18:00 | 23.5 | 4/7/2011 02:13:01 | 25.625 |
| 8/8/2010 18:53:00 | 23.5 | 4/7/2011 02:49:01 | 25.625 |
| 8/8/2010 19:28:00 | 23.5 | 4/7/2011 03:25:01 | 25.625 |
| 8/8/2010 20:03:00 | 23.5 | 4/7/2011 04:01:01 | 25.625 |
| 8/8/2010 20:38:00 | 23.5 | 4/7/2011 04:37:01 | 25.625 |
| 8/8/2010 21:13:00 | 23.5 | 4/7/2011 05:13:01 | 25.625 |
| 8/8/2010 21:48:00 | 23.5 | 4/7/2011 05:49:01 | 25.625 |
| 8/8/2010 22:23:00 | 23.5 | 4/7/2011 06:25:01 | 25.625 |
| 8/8/2010 22:58:00 | 23.5 | 4/7/2011 07:01:01 | 25.625 |
| 8/8/2010 23:33:00 | 23.5 | 4/7/2011 07:37:01 | 25.625 |

|                    |      |                   |        |
|--------------------|------|-------------------|--------|
| 8/9/2010 00:08:00  | 23.5 | 4/7/2011 08:13:01 | 25.625 |
| 8/9/2010 00:43:00  | 23.5 | 4/7/2011 08:49:01 | 25.625 |
| 8/9/2010 01:18:00  | 23.5 | 4/7/2011 09:25:01 | 25.625 |
| 8/9/2010 01:53:00  | 23.5 | 4/7/2011 10:01:01 | 25.625 |
| 8/9/2010 02:28:00  | 23.5 | 4/7/2011 10:37:01 | 25.625 |
| 8/9/2010 03:03:00  | 23.5 | 4/7/2011 11:13:01 | 25.625 |
| 8/9/2010 03:38:00  | 23.5 | 4/7/2011 11:49:01 | 25.625 |
| 8/9/2010 04:13:00  | 23.5 | 4/7/2011 12:25:01 | 25.625 |
| 8/9/2010 04:48:00  | 23.0 | 4/7/2011 13:01:01 | 25.625 |
| 8/9/2010 05:23:00  | 23.0 | 4/7/2011 13:37:01 | 25.625 |
| 8/9/2010 05:58:00  | 23.0 | 4/7/2011 14:13:01 | 25.625 |
| 8/9/2010 06:33:00  | 23.0 | 4/7/2011 14:49:01 | 25.625 |
| 8/9/2010 07:08:00  | 23.0 | 4/7/2011 15:25:01 | 25.625 |
| 8/9/2010 07:43:00  | 23.0 | 4/7/2011 16:01:01 | 25.625 |
| 8/9/2010 08:18:00  | 23.0 | 4/7/2011 16:37:01 | 25.625 |
| 8/9/2010 08:53:00  | 23.0 | 4/7/2011 17:13:01 | 25.625 |
| 8/9/2010 09:28:00  | 23.0 | 4/7/2011 17:49:01 | 25.625 |
| 8/9/2010 10:03:00  | 23.0 | 4/7/2011 18:25:01 | 25.625 |
| 8/9/2010 10:38:00  | 23.0 | 4/7/2011 19:01:01 | 25.625 |
| 8/9/2010 11:13:00  | 23.0 | 4/7/2011 19:37:01 | 25.625 |
| 8/9/2010 11:48:00  | 23.0 | 4/7/2011 20:13:01 | 25.625 |
| 8/9/2010 12:23:00  | 23.0 | 4/7/2011 20:49:01 | 25.625 |
| 8/9/2010 12:58:00  | 23.0 | 4/7/2011 21:25:01 | 25.625 |
| 8/9/2010 13:33:00  | 23.0 | 4/7/2011 22:01:01 | 25.625 |
| 8/9/2010 14:08:00  | 23.0 | 4/7/2011 22:37:01 | 25.625 |
| 8/9/2010 14:43:00  | 23.0 | 4/7/2011 23:13:01 | 25.625 |
| 8/9/2010 15:18:00  | 23.0 | 4/7/2011 23:49:01 | 25.625 |
| 8/9/2010 15:53:00  | 23.0 | 4/8/2011 00:25:01 | 25.625 |
| 8/9/2010 16:28:00  | 23.0 | 4/8/2011 01:01:01 | 25.625 |
| 8/9/2010 17:03:00  | 23.0 | 4/8/2011 01:37:01 | 25.625 |
| 8/9/2010 17:38:00  | 23.0 | 4/8/2011 02:13:01 | 25.625 |
| 8/9/2010 18:13:00  | 23.0 | 4/8/2011 02:49:01 | 25.625 |
| 8/9/2010 18:48:00  | 23.0 | 4/8/2011 03:25:01 | 25.625 |
| 8/9/2010 19:23:00  | 23.0 | 4/8/2011 04:01:01 | 25.625 |
| 8/9/2010 19:58:00  | 23.0 | 4/8/2011 04:37:01 | 25.625 |
| 8/9/2010 20:33:00  | 23.0 | 4/8/2011 05:13:01 | 25.625 |
| 8/9/2010 21:08:00  | 23.5 | 4/8/2011 05:49:01 | 25.625 |
| 8/9/2010 21:43:00  | 23.5 | 4/8/2011 06:25:01 | 25.625 |
| 8/9/2010 22:18:00  | 23.5 | 4/8/2011 07:01:01 | 25.625 |
| 8/9/2010 22:53:00  | 23.5 | 4/8/2011 07:37:01 | 25.625 |
| 8/9/2010 23:28:00  | 23.5 | 4/8/2011 08:13:01 | 25.625 |
| 8/10/2010 00:03:00 | 23.5 | 4/8/2011 08:49:01 | 25.625 |
| 8/10/2010 00:38:00 | 23.5 | 4/8/2011 09:25:01 | 25.625 |
| 8/10/2010 01:13:00 | 23.5 | 4/8/2011 10:01:01 | 25.625 |
| 8/10/2010 01:48:00 | 23.5 | 4/8/2011 10:37:01 | 25.625 |
| 8/10/2010 02:23:00 | 23.5 | 4/8/2011 11:13:01 | 25.625 |
| 8/10/2010 02:58:00 | 23.5 | 4/8/2011 11:49:01 | 25.625 |
| 8/10/2010 03:33:00 | 23.5 | 4/8/2011 12:25:01 | 25.625 |
| 8/10/2010 04:08:00 | 23.5 | 4/8/2011 13:01:01 | 25.625 |
| 8/10/2010 04:43:00 | 23.5 | 4/8/2011 13:37:01 | 25.625 |

|                    |      |                   |        |
|--------------------|------|-------------------|--------|
| 8/10/2010 05:18:00 | 23.5 | 4/8/2011 14:13:01 | 25.625 |
| 8/10/2010 05:53:00 | 23.5 | 4/8/2011 14:49:01 | 25.625 |
| 8/10/2010 06:28:00 | 23.5 | 4/8/2011 15:25:01 | 25.625 |
| 8/10/2010 07:03:00 | 23.0 | 4/8/2011 16:01:01 | 25.625 |
| 8/10/2010 07:38:00 | 23.0 | 4/8/2011 16:37:01 | 25.625 |
| 8/10/2010 08:13:00 | 23.0 | 4/8/2011 17:13:01 | 25.625 |
| 8/10/2010 08:48:00 | 23.0 | 4/8/2011 17:49:01 | 25.625 |
| 8/10/2010 09:23:00 | 23.0 | 4/8/2011 18:25:01 | 25.625 |
| 8/10/2010 09:58:00 | 23.0 | 4/8/2011 19:01:01 | 25.625 |
| 8/10/2010 10:33:00 | 23.0 | 4/8/2011 19:37:01 | 25.625 |
| 8/10/2010 11:08:00 | 23.0 | 4/8/2011 20:13:01 | 25.625 |
| 8/10/2010 11:43:00 | 23.0 | 4/8/2011 20:49:01 | 25.625 |
| 8/10/2010 12:18:00 | 23.0 | 4/8/2011 21:25:01 | 25.625 |
| 8/10/2010 12:53:00 | 23.0 | 4/8/2011 22:01:01 | 25.625 |
| 8/10/2010 13:28:00 | 23.0 | 4/8/2011 22:37:01 | 25.625 |
| 8/10/2010 14:03:00 | 23.0 | 4/8/2011 23:13:01 | 25.625 |
| 8/10/2010 14:38:00 | 23.5 | 4/8/2011 23:49:01 | 25.625 |
| 8/10/2010 15:13:00 | 23.5 | 4/9/2011 00:25:01 | 25.625 |
| 8/10/2010 15:48:00 | 23.5 | 4/9/2011 01:01:01 | 25.625 |
| 8/10/2010 16:23:00 | 23.5 | 4/9/2011 01:37:01 | 25.625 |
| 8/10/2010 16:58:00 | 23.5 | 4/9/2011 02:13:01 | 25.625 |
| 8/10/2010 17:33:00 | 23.5 | 4/9/2011 02:49:01 | 25.625 |
| 8/10/2010 18:08:00 | 23.5 | 4/9/2011 03:25:01 | 25.625 |
| 8/10/2010 18:43:00 | 23.5 | 4/9/2011 04:01:01 | 25.625 |
| 8/10/2010 19:18:00 | 23.5 | 4/9/2011 04:37:01 | 25.625 |
| 8/10/2010 19:53:00 | 23.5 | 4/9/2011 05:13:01 | 25.625 |
| 8/10/2010 20:28:00 | 23.5 | 4/9/2011 05:49:01 | 25.625 |
| 8/10/2010 21:03:00 | 23.5 | 4/9/2011 06:25:01 | 25.625 |
| 8/10/2010 21:38:00 | 23.5 | 4/9/2011 07:01:01 | 25.625 |
| 8/10/2010 22:13:00 | 23.5 | 4/9/2011 07:37:01 | 25.625 |
| 8/10/2010 22:48:00 | 23.5 | 4/9/2011 08:13:01 | 25.625 |
| 8/10/2010 23:23:00 | 23.5 | 4/9/2011 08:49:01 | 25.625 |
| 8/10/2010 23:58:00 | 23.5 | 4/9/2011 09:25:01 | 25.625 |
| 8/11/2010 00:33:00 | 23.5 | 4/9/2011 10:01:01 | 25.625 |
| 8/11/2010 01:08:00 | 23.5 | 4/9/2011 10:37:01 | 25.625 |
| 8/11/2010 01:43:00 | 23.5 | 4/9/2011 11:13:01 | 25.625 |
| 8/11/2010 02:18:00 | 23.5 | 4/9/2011 11:49:01 | 25.625 |
| 8/11/2010 02:53:00 | 23.5 | 4/9/2011 12:25:01 | 25.625 |
| 8/11/2010 03:28:00 | 23.5 | 4/9/2011 13:01:01 | 25.625 |
| 8/11/2010 04:03:00 | 23.5 | 4/9/2011 13:37:01 | 25.625 |
| 8/11/2010 04:38:00 | 23.5 | 4/9/2011 14:13:01 | 25.625 |
| 8/11/2010 05:13:00 | 23.5 | 4/9/2011 14:49:01 | 25.625 |
| 8/11/2010 05:48:00 | 23.5 | 4/9/2011 15:25:01 | 25.625 |
| 8/11/2010 06:23:00 | 23.5 | 4/9/2011 16:01:01 | 25.625 |
| 8/11/2010 06:58:00 | 23.5 | 4/9/2011 16:37:01 | 25.625 |
| 8/11/2010 07:33:00 | 23.5 | 4/9/2011 17:13:01 | 25.625 |
| 8/11/2010 08:08:00 | 23.5 | 4/9/2011 17:49:01 | 25.625 |
| 8/11/2010 08:43:00 | 23.5 | 4/9/2011 18:25:01 | 25.625 |
| 8/11/2010 09:18:00 | 23.5 | 4/9/2011 19:01:01 | 25.625 |
| 8/11/2010 09:53:00 | 23.5 | 4/9/2011 19:37:01 | 25.625 |

|                    |      |                    |        |
|--------------------|------|--------------------|--------|
| 8/11/2010 10:28:00 | 23.5 | 4/9/2011 20:13:01  | 25.625 |
| 8/11/2010 11:03:00 | 23.5 | 4/9/2011 20:49:01  | 25.625 |
| 8/11/2010 11:38:00 | 23.5 | 4/9/2011 21:25:01  | 25.625 |
| 8/11/2010 12:13:00 | 23.5 | 4/9/2011 22:01:01  | 25.625 |
| 8/11/2010 12:48:00 | 23.5 | 4/9/2011 22:37:01  | 25.625 |
| 8/11/2010 13:23:00 | 23.5 | 4/9/2011 23:13:01  | 25.625 |
| 8/11/2010 13:58:00 | 23.5 | 4/9/2011 23:49:01  | 25.625 |
| 8/11/2010 14:33:00 | 23.5 | 4/10/2011 00:25:01 | 25.625 |
| 8/11/2010 15:08:00 | 23.5 | 4/10/2011 01:01:01 | 25.625 |
| 8/11/2010 15:43:00 | 23.5 | 4/10/2011 01:37:01 | 25.625 |
| 8/11/2010 16:18:00 | 23.5 | 4/10/2011 02:13:01 | 25.625 |
| 8/11/2010 16:53:00 | 23.5 | 4/10/2011 02:49:01 | 25.625 |
| 8/11/2010 17:28:00 | 23.5 | 4/10/2011 03:25:01 | 25.625 |
| 8/11/2010 18:03:00 | 23.5 | 4/10/2011 04:01:01 | 25.625 |
| 8/11/2010 18:38:00 | 23.5 | 4/10/2011 04:37:01 | 25.625 |
| 8/11/2010 19:13:00 | 23.5 | 4/10/2011 05:13:01 | 25.625 |
| 8/11/2010 19:48:00 | 23.5 | 4/10/2011 05:49:01 | 25.625 |
| 8/11/2010 20:23:00 | 24.0 | 4/10/2011 06:25:01 | 25.625 |
| 8/11/2010 20:58:00 | 24.0 | 4/10/2011 07:01:01 | 25.625 |
| 8/11/2010 21:33:00 | 24.0 | 4/10/2011 07:37:01 | 25.625 |
| 8/11/2010 22:08:00 | 23.5 | 4/10/2011 08:13:01 | 25.625 |
| 8/11/2010 22:43:00 | 24.0 | 4/10/2011 08:49:01 | 25.625 |
| 8/11/2010 23:18:00 | 24.0 | 4/10/2011 09:25:01 | 25.625 |
| 8/11/2010 23:53:00 | 24.0 | 4/10/2011 10:01:01 | 25.625 |
| 8/12/2010 00:28:00 | 24.0 | 4/10/2011 10:37:01 | 25.625 |
| 8/12/2010 01:03:00 | 24.0 | 4/10/2011 11:13:01 | 25.625 |
| 8/12/2010 01:38:00 | 24.0 | 4/10/2011 11:49:01 | 25.625 |
| 8/12/2010 02:13:00 | 23.5 | 4/10/2011 12:25:01 | 25.625 |
| 8/12/2010 02:48:00 | 24.0 | 4/10/2011 13:01:01 | 25.625 |
| 8/12/2010 03:23:00 | 23.5 | 4/10/2011 13:37:01 | 25.625 |
| 8/12/2010 03:58:00 | 23.5 | 4/10/2011 14:13:01 | 25.625 |
| 8/12/2010 04:33:00 | 23.5 | 4/10/2011 14:49:01 | 25.625 |
| 8/12/2010 05:08:00 | 23.5 | 4/10/2011 15:25:01 | 25.625 |
| 8/12/2010 05:43:00 | 23.5 | 4/10/2011 16:01:01 | 25.625 |
| 8/12/2010 06:18:00 | 23.5 | 4/10/2011 16:37:01 | 25.625 |
| 8/12/2010 06:53:00 | 23.5 | 4/10/2011 17:13:01 | 25.625 |
| 8/12/2010 07:28:00 | 23.5 | 4/10/2011 17:49:01 | 25.625 |
| 8/12/2010 08:03:00 | 23.5 | 4/10/2011 18:25:01 | 25.625 |
| 8/12/2010 08:38:00 | 23.5 | 4/10/2011 19:01:01 | 25.625 |
| 8/12/2010 09:13:00 | 23.5 | 4/10/2011 19:37:01 | 25.625 |
| 8/12/2010 09:48:00 | 23.5 | 4/10/2011 20:13:01 | 25.625 |
| 8/12/2010 10:23:00 | 23.5 | 4/10/2011 20:49:01 | 25.625 |
| 8/12/2010 10:58:00 | 23.5 | 4/10/2011 21:25:01 | 25.625 |
| 8/12/2010 11:33:00 | 23.5 | 4/10/2011 22:01:01 | 25.625 |
| 8/12/2010 12:08:00 | 23.5 | 4/10/2011 22:37:01 | 25.625 |
| 8/12/2010 12:43:00 | 23.5 | 4/10/2011 23:13:01 | 25.625 |
| 8/12/2010 13:18:00 | 23.5 | 4/10/2011 23:49:01 | 25.625 |
| 8/12/2010 13:53:00 | 23.5 | 4/11/2011 00:25:01 | 25.625 |
| 8/12/2010 14:28:00 | 23.5 | 4/11/2011 01:01:01 | 25.625 |
| 8/12/2010 15:03:00 | 23.5 | 4/11/2011 01:37:01 | 25.625 |



|                    |      |                    |        |
|--------------------|------|--------------------|--------|
| 8/12/2010 15:38:00 | 23.5 | 4/11/2011 02:13:01 | 25.625 |
| 8/12/2010 16:13:00 | 23.5 | 4/11/2011 02:49:01 | 25.625 |
| 8/12/2010 16:48:00 | 23.5 | 4/11/2011 03:25:01 | 25.625 |
| 8/12/2010 17:23:00 | 23.5 | 4/11/2011 04:01:01 | 25.625 |
| 8/12/2010 17:58:00 | 24.0 | 4/11/2011 04:37:01 | 25.625 |
| 8/12/2010 18:33:00 | 24.0 | 4/11/2011 05:13:01 | 25.625 |
| 8/12/2010 19:08:00 | 24.0 | 4/11/2011 05:49:01 | 25.625 |
| 8/12/2010 19:43:00 | 24.0 | 4/11/2011 06:25:01 | 25.625 |
| 8/12/2010 20:18:00 | 24.0 | 4/11/2011 07:01:01 | 25.625 |
| 8/12/2010 20:53:00 | 24.0 | 4/11/2011 07:37:01 | 25.625 |
| 8/12/2010 21:28:00 | 24.0 | 4/11/2011 08:13:01 | 25.625 |
| 8/12/2010 22:03:00 | 24.0 | 4/11/2011 08:49:01 | 25.625 |
| 8/12/2010 22:38:00 | 24.0 | 4/11/2011 09:25:01 | 25.625 |
| 8/12/2010 23:13:00 | 24.0 | 4/11/2011 10:01:01 | 25.625 |
| 8/12/2010 23:48:00 | 23.5 | 4/11/2011 10:37:01 | 25.625 |
| 8/13/2010 00:23:00 | 24.0 | 4/11/2011 11:13:01 | 25.625 |
| 8/13/2010 00:58:00 | 23.5 | 4/11/2011 11:49:01 | 25.625 |
| 8/13/2010 01:33:00 | 23.5 | 4/11/2011 12:25:01 | 25.625 |
| 8/13/2010 02:08:00 | 23.5 | 4/11/2011 13:01:01 | 25.625 |
| 8/13/2010 02:43:00 | 23.5 | 4/11/2011 13:37:01 | 25.625 |
| 8/13/2010 03:18:00 | 23.5 | 4/11/2011 14:13:01 | 25.625 |
| 8/13/2010 03:53:00 | 23.5 | 4/11/2011 14:49:01 | 25.625 |
| 8/13/2010 04:28:00 | 23.5 | 4/11/2011 15:25:01 | 25.625 |
| 8/13/2010 05:03:00 | 23.5 | 4/11/2011 16:01:01 | 25.625 |
| 8/13/2010 05:38:00 | 23.5 | 4/11/2011 16:37:01 | 25.625 |
| 8/13/2010 06:13:00 | 23.5 | 4/11/2011 17:13:01 | 25.625 |
| 8/13/2010 06:48:00 | 23.5 | 4/11/2011 17:49:01 | 25.625 |
| 8/13/2010 07:23:00 | 23.5 | 4/11/2011 18:25:01 | 25.625 |
| 8/13/2010 07:58:00 | 23.5 | 4/11/2011 19:01:01 | 25.625 |
| 8/13/2010 08:33:00 | 23.5 | 4/11/2011 19:37:01 | 25.625 |
| 8/13/2010 09:08:00 | 23.5 | 4/11/2011 20:13:01 | 25.625 |
| 8/13/2010 09:43:00 | 23.5 | 4/11/2011 20:49:01 | 25.625 |
| 8/13/2010 10:18:00 | 23.5 | 4/11/2011 21:25:01 | 25.625 |
| 8/13/2010 10:53:00 | 23.5 | 4/11/2011 22:01:01 | 25.625 |
| 8/13/2010 11:28:00 | 23.0 | 4/11/2011 22:37:01 | 25.625 |
| 8/13/2010 12:03:00 | 23.0 | 4/11/2011 23:13:01 | 25.625 |
| 8/13/2010 12:38:00 | 23.0 | 4/11/2011 23:49:01 | 25.625 |
| 8/13/2010 13:13:00 | 23.0 | 4/12/2011 00:25:01 | 25.625 |
| 8/13/2010 13:48:00 | 23.5 | 4/12/2011 01:01:01 | 25.625 |
| 8/13/2010 14:23:00 | 23.5 | 4/12/2011 01:37:01 | 25.625 |
| 8/13/2010 14:58:00 | 23.5 | 4/12/2011 02:13:01 | 25.625 |
| 8/13/2010 15:33:00 | 23.5 | 4/12/2011 02:49:01 | 25.625 |
| 8/13/2010 16:08:00 | 23.5 | 4/12/2011 03:25:01 | 25.625 |
| 8/13/2010 16:43:00 | 23.5 | 4/12/2011 04:01:01 | 25.625 |
| 8/13/2010 17:18:00 | 23.5 | 4/12/2011 04:37:01 | 25.625 |
| 8/13/2010 17:53:00 | 23.5 | 4/12/2011 05:13:01 | 25.625 |
| 8/13/2010 18:28:00 | 23.5 | 4/12/2011 05:49:01 | 25.625 |
| 8/13/2010 19:03:00 | 23.5 | 4/12/2011 06:25:01 | 25.625 |
| 8/13/2010 19:38:00 | 23.5 | 4/12/2011 07:01:01 | 25.625 |
| 8/13/2010 20:13:00 | 23.5 | 4/12/2011 07:37:01 | 25.625 |

|                    |      |                    |        |
|--------------------|------|--------------------|--------|
| 8/13/2010 20:48:00 | 23.5 | 4/12/2011 08:13:01 | 25.625 |
| 8/13/2010 21:23:00 | 23.5 | 4/12/2011 08:49:01 | 25.625 |
| 8/13/2010 21:58:00 | 23.5 | 4/12/2011 09:25:01 | 25.625 |
| 8/13/2010 22:33:00 | 23.5 | 4/12/2011 10:01:01 | 25.625 |
| 8/13/2010 23:08:00 | 23.5 | 4/12/2011 10:37:01 | 25.625 |
| 8/13/2010 23:43:00 | 23.5 | 4/12/2011 11:13:01 | 25.625 |
| 8/14/2010 00:18:00 | 23.5 | 4/12/2011 11:49:01 | 25.625 |
| 8/14/2010 00:53:00 | 23.5 | 4/12/2011 12:25:01 | 25.625 |
| 8/14/2010 01:28:00 | 23.5 | 4/12/2011 13:01:01 | 25.625 |
| 8/14/2010 02:03:00 | 23.5 | 4/12/2011 13:37:01 | 25.625 |
| 8/14/2010 02:38:00 | 23.5 | 4/12/2011 14:13:01 | 25.625 |
| 8/14/2010 03:13:00 | 23.5 | 4/12/2011 14:49:01 | 25.625 |
| 8/14/2010 03:48:00 | 23.5 | 4/12/2011 15:25:01 | 25.625 |
| 8/14/2010 04:23:00 | 23.5 | 4/12/2011 16:01:01 | 25.625 |
| 8/14/2010 04:58:00 | 23.5 | 4/12/2011 16:37:01 | 25.625 |
| 8/14/2010 05:33:00 | 23.0 | 4/12/2011 17:13:01 | 25.625 |
| 8/14/2010 06:08:00 | 23.0 | 4/12/2011 17:49:01 | 25.625 |
| 8/14/2010 06:43:00 | 23.0 | 4/12/2011 18:25:01 | 25.625 |
| 8/14/2010 07:18:00 | 23.0 | 4/12/2011 19:01:01 | 25.625 |
| 8/14/2010 07:53:00 | 23.0 | 4/12/2011 19:37:01 | 25.625 |
| 8/14/2010 08:28:00 | 23.0 | 4/12/2011 20:13:01 | 25.625 |
| 8/14/2010 09:03:00 | 23.0 | 4/12/2011 20:49:01 | 25.625 |
| 8/14/2010 09:38:00 | 23.0 | 4/12/2011 21:25:01 | 25.625 |
| 8/14/2010 10:13:00 | 23.0 | 4/12/2011 22:01:01 | 25.625 |
| 8/14/2010 10:48:00 | 23.0 | 4/12/2011 22:37:01 | 25.625 |
| 8/14/2010 11:23:00 | 23.0 | 4/12/2011 23:13:01 | 25.625 |
| 8/14/2010 11:58:00 | 23.0 | 4/12/2011 23:49:01 | 25.625 |
| 8/14/2010 12:33:00 | 23.0 | 4/13/2011 00:25:01 | 26.125 |
| 8/14/2010 13:08:00 | 23.0 | 4/13/2011 01:01:01 | 26.125 |
| 8/14/2010 13:43:00 | 23.0 | 4/13/2011 01:37:01 | 25.625 |
| 8/14/2010 14:18:00 | 23.0 | 4/13/2011 02:13:01 | 25.625 |
| 8/14/2010 14:53:00 | 23.0 | 4/13/2011 02:49:01 | 25.625 |
| 8/14/2010 15:28:00 | 23.0 | 4/13/2011 03:25:01 | 25.625 |
| 8/14/2010 16:03:00 | 23.0 | 4/13/2011 04:01:01 | 25.625 |
| 8/14/2010 16:38:00 | 23.0 | 4/13/2011 04:37:01 | 25.625 |
| 8/14/2010 17:13:00 | 23.0 | 4/13/2011 05:13:01 | 25.625 |
| 8/14/2010 17:48:00 | 23.0 | 4/13/2011 05:49:01 | 25.625 |
| 8/14/2010 18:23:00 | 23.0 | 4/13/2011 06:25:01 | 25.625 |
| 8/14/2010 18:58:00 | 23.0 | 4/13/2011 07:01:01 | 25.625 |
| 8/14/2010 19:33:00 | 23.0 | 4/13/2011 07:37:01 | 25.625 |
| 8/14/2010 20:08:00 | 23.0 | 4/13/2011 08:13:01 | 25.625 |
| 8/14/2010 20:43:00 | 23.0 | 4/13/2011 08:49:01 | 25.625 |
| 8/14/2010 21:18:00 | 23.0 | 4/13/2011 09:25:01 | 25.625 |
| 8/14/2010 21:53:00 | 23.0 | 4/13/2011 10:01:01 | 25.625 |
| 8/14/2010 22:28:00 | 23.0 | 4/13/2011 10:37:01 | 25.625 |
| 8/14/2010 23:03:00 | 23.0 | 4/13/2011 11:13:01 | 25.625 |
| 8/14/2010 23:38:00 | 23.0 | 4/13/2011 11:49:01 | 25.625 |
| 8/15/2010 00:13:00 | 23.0 | 4/13/2011 12:25:01 | 25.625 |
| 8/15/2010 00:48:00 | 23.0 | 4/13/2011 13:01:01 | 25.625 |
| 8/15/2010 01:23:00 | 23.0 | 4/13/2011 13:37:01 | 25.625 |

|                    |      |                    |        |
|--------------------|------|--------------------|--------|
| 8/15/2010 01:58:00 | 23.0 | 4/13/2011 14:13:01 | 25.625 |
| 8/15/2010 02:33:00 | 23.0 | 4/13/2011 14:49:01 | 25.625 |
| 8/15/2010 03:08:00 | 23.0 | 4/13/2011 15:25:01 | 25.625 |
| 8/15/2010 03:43:00 | 23.0 | 4/13/2011 16:01:01 | 25.625 |
| 8/15/2010 04:18:00 | 23.0 | 4/13/2011 16:37:01 | 25.625 |
| 8/15/2010 04:53:00 | 23.0 | 4/13/2011 17:13:01 | 25.625 |
| 8/15/2010 05:28:00 | 23.0 | 4/13/2011 17:49:01 | 25.625 |
| 8/15/2010 06:03:00 | 23.0 | 4/13/2011 18:25:01 | 25.625 |
| 8/15/2010 06:38:00 | 23.0 | 4/13/2011 19:01:01 | 25.625 |
| 8/15/2010 07:13:00 | 23.0 | 4/13/2011 19:37:01 | 25.625 |
| 8/15/2010 07:48:00 | 23.0 | 4/13/2011 20:13:01 | 25.625 |
| 8/15/2010 08:23:00 | 23.0 | 4/13/2011 20:49:01 | 25.625 |
| 8/15/2010 08:58:00 | 23.0 | 4/13/2011 21:25:01 | 25.625 |
| 8/15/2010 09:33:00 | 23.0 | 4/13/2011 22:01:01 | 25.625 |
| 8/15/2010 10:08:00 | 23.0 | 4/13/2011 22:37:01 | 25.625 |
| 8/15/2010 10:43:00 | 23.0 | 4/13/2011 23:13:01 | 25.625 |
| 8/15/2010 11:18:00 | 23.0 | 4/13/2011 23:49:01 | 25.625 |
| 8/15/2010 11:53:00 | 23.0 | 4/14/2011 00:25:01 | 25.625 |
| 8/15/2010 12:28:00 | 23.0 | 4/14/2011 01:01:01 | 25.625 |
| 8/15/2010 13:03:00 | 23.0 | 4/14/2011 01:37:01 | 25.625 |
| 8/15/2010 13:38:00 | 23.0 | 4/14/2011 02:13:01 | 25.625 |
| 8/15/2010 14:13:00 | 23.0 | 4/14/2011 02:49:01 | 25.625 |
| 8/15/2010 14:48:00 | 23.0 | 4/14/2011 03:25:01 | 25.625 |
| 8/15/2010 15:23:00 | 23.0 | 4/14/2011 04:01:01 | 25.625 |
| 8/15/2010 15:58:00 | 23.0 | 4/14/2011 04:37:01 | 25.625 |
| 8/15/2010 16:33:00 | 23.0 | 4/14/2011 05:13:01 | 25.625 |
| 8/15/2010 17:08:00 | 23.0 | 4/14/2011 05:49:01 | 25.625 |
| 8/15/2010 17:43:00 | 23.0 | 4/14/2011 06:25:01 | 25.625 |
| 8/15/2010 18:18:00 | 23.0 | 4/14/2011 07:01:01 | 25.625 |
| 8/15/2010 18:53:00 | 23.0 | 4/14/2011 07:37:01 | 25.625 |
| 8/15/2010 19:28:00 | 23.0 | 4/14/2011 08:13:01 | 25.625 |
| 8/15/2010 20:03:00 | 23.0 | 4/14/2011 08:49:01 | 25.625 |
| 8/15/2010 20:38:00 | 23.0 | 4/14/2011 09:25:01 | 25.625 |
| 8/15/2010 21:13:00 | 23.0 | 4/14/2011 10:01:01 | 25.625 |
| 8/15/2010 21:48:00 | 23.0 | 4/14/2011 10:37:01 | 25.625 |
| 8/15/2010 22:23:00 | 23.0 | 4/14/2011 11:13:01 | 25.625 |
| 8/15/2010 22:58:00 | 23.0 | 4/14/2011 11:49:01 | 25.625 |
| 8/15/2010 23:33:00 | 23.0 | 4/14/2011 12:25:01 | 25.625 |
| 8/16/2010 00:08:00 | 23.0 | 4/14/2011 13:01:01 | 25.126 |
| 8/16/2010 00:43:00 | 23.0 | 4/14/2011 13:37:01 | 25.126 |
| 8/16/2010 01:18:00 | 23.0 | 4/14/2011 14:13:01 | 25.126 |
| 8/16/2010 01:53:00 | 23.0 | 4/14/2011 14:49:01 | 25.625 |
| 8/16/2010 02:28:00 | 23.0 | 4/14/2011 15:25:01 | 25.625 |
| 8/16/2010 03:03:00 | 23.0 | 4/14/2011 16:01:01 | 25.625 |
| 8/16/2010 03:38:00 | 23.0 | 4/14/2011 16:37:01 | 25.625 |
| 8/16/2010 04:13:00 | 23.0 | 4/14/2011 17:13:01 | 25.625 |
| 8/16/2010 04:48:00 | 23.0 | 4/14/2011 17:49:01 | 25.625 |
| 8/16/2010 05:23:00 | 23.0 | 4/14/2011 18:25:01 | 25.625 |
| 8/16/2010 05:58:00 | 23.0 | 4/14/2011 19:01:01 | 25.625 |
| 8/16/2010 06:33:00 | 23.0 | 4/14/2011 19:37:01 | 25.625 |

|                    |      |                    |        |
|--------------------|------|--------------------|--------|
| 8/16/2010 07:08:00 | 23.0 | 4/14/2011 20:13:01 | 25.625 |
| 8/16/2010 07:43:00 | 23.0 | 4/14/2011 20:49:01 | 25.625 |
| 8/16/2010 08:18:00 | 23.0 | 4/14/2011 21:25:01 | 25.625 |
| 8/16/2010 08:53:00 | 23.0 | 4/14/2011 22:01:01 | 25.625 |
| 8/16/2010 09:28:00 | 23.0 | 4/14/2011 22:37:01 | 25.625 |
| 8/16/2010 10:03:00 | 23.0 | 4/14/2011 23:13:01 | 25.625 |
| 8/16/2010 10:38:00 | 22.5 | 4/14/2011 23:49:01 | 25.625 |
| 8/16/2010 11:13:00 | 22.5 | 4/15/2011 00:25:01 | 25.625 |
| 8/16/2010 11:48:00 | 22.5 | 4/15/2011 01:01:01 | 25.625 |
| 8/16/2010 12:23:00 | 23.0 | 4/15/2011 01:37:01 | 25.625 |
| 8/16/2010 12:58:00 | 23.0 | 4/15/2011 02:13:01 | 25.625 |
| 8/16/2010 13:33:00 | 23.0 | 4/15/2011 02:49:01 | 25.625 |
| 8/16/2010 14:08:00 | 23.0 | 4/15/2011 03:25:01 | 25.625 |
| 8/16/2010 14:43:00 | 23.0 | 4/15/2011 04:01:01 | 25.625 |
| 8/16/2010 15:18:00 | 23.0 | 4/15/2011 04:37:01 | 25.625 |
| 8/16/2010 15:53:00 | 23.0 | 4/15/2011 05:13:01 | 25.625 |
| 8/16/2010 16:28:00 | 23.0 | 4/15/2011 05:49:01 | 25.625 |
| 8/16/2010 17:03:00 | 23.0 | 4/15/2011 06:25:01 | 25.625 |
| 8/16/2010 17:38:00 | 23.0 | 4/15/2011 07:01:01 | 25.625 |
| 8/16/2010 18:13:00 | 23.0 | 4/15/2011 07:37:01 | 25.625 |
| 8/16/2010 18:48:00 | 23.0 | 4/15/2011 08:13:01 | 25.625 |
| 8/16/2010 19:23:00 | 23.0 | 4/15/2011 08:49:01 | 25.625 |
| 8/16/2010 19:58:00 | 23.0 | 4/15/2011 09:25:01 | 25.126 |
| 8/16/2010 20:33:00 | 23.0 | 4/15/2011 10:01:01 | 25.126 |
| 8/16/2010 21:08:00 | 23.0 | 4/15/2011 10:37:01 | 25.625 |
| 8/16/2010 21:43:00 | 23.0 | 4/15/2011 11:13:01 | 25.625 |
| 8/16/2010 22:18:00 | 23.0 | 4/15/2011 11:49:01 | 25.625 |
| 8/16/2010 22:53:00 | 23.0 | 4/15/2011 12:25:01 | 25.625 |
| 8/16/2010 23:28:00 | 23.0 | 4/15/2011 13:01:01 | 25.126 |
| 8/17/2010 00:03:00 | 23.0 | 4/15/2011 13:37:01 | 25.126 |
| 8/17/2010 00:38:00 | 23.0 | 4/15/2011 14:13:01 | 25.126 |
| 8/17/2010 01:13:00 | 23.0 | 4/15/2011 14:49:01 | 25.126 |
| 8/17/2010 01:48:00 | 23.0 | 4/15/2011 15:25:01 | 25.126 |
| 8/17/2010 02:23:00 | 23.0 | 4/15/2011 16:01:01 | 25.126 |
| 8/17/2010 02:58:00 | 23.0 | 4/15/2011 16:37:01 | 25.126 |
| 8/17/2010 03:33:00 | 23.0 | 4/15/2011 17:13:01 | 25.625 |
| 8/17/2010 04:08:00 | 23.0 | 4/15/2011 17:49:01 | 25.126 |
| 8/17/2010 04:43:00 | 23.0 | 4/15/2011 18:25:01 | 25.126 |
| 8/17/2010 05:18:00 | 23.0 | 4/15/2011 19:01:01 | 25.126 |
| 8/17/2010 05:53:00 | 23.0 | 4/15/2011 19:37:01 | 25.625 |
| 8/17/2010 06:28:00 | 23.0 | 4/15/2011 20:13:01 | 25.625 |
| 8/17/2010 07:03:00 | 23.0 | 4/15/2011 20:49:01 | 25.625 |
| 8/17/2010 07:38:00 | 23.0 | 4/15/2011 21:25:01 | 25.625 |
| 8/17/2010 08:13:00 | 23.0 | 4/15/2011 22:01:01 | 25.625 |
| 8/17/2010 08:48:00 | 23.0 | 4/15/2011 22:37:01 | 25.625 |
| 8/17/2010 09:23:00 | 23.0 | 4/15/2011 23:13:01 | 25.625 |
| 8/17/2010 09:58:00 | 23.0 | 4/15/2011 23:49:01 | 25.625 |
| 8/17/2010 10:33:00 | 23.0 | 4/16/2011 00:25:01 | 25.625 |
| 8/17/2010 11:08:00 | 23.0 | 4/16/2011 01:01:01 | 25.625 |
| 8/17/2010 11:43:00 | 23.0 | 4/16/2011 01:37:01 | 25.625 |

|                    |      |                    |        |
|--------------------|------|--------------------|--------|
| 8/17/2010 12:18:00 | 23.0 | 4/16/2011 02:13:01 | 25.625 |
| 8/17/2010 12:53:00 | 23.0 | 4/16/2011 02:49:01 | 25.625 |
| 8/17/2010 13:28:00 | 23.0 | 4/16/2011 03:25:01 | 25.625 |
| 8/17/2010 14:03:00 | 23.0 | 4/16/2011 04:01:01 | 25.625 |
| 8/17/2010 14:38:00 | 23.0 | 4/16/2011 04:37:01 | 25.625 |
| 8/17/2010 15:13:00 | 23.0 | 4/16/2011 05:13:01 | 25.625 |
| 8/17/2010 15:48:00 | 23.0 | 4/16/2011 05:49:01 | 25.625 |
| 8/17/2010 16:23:00 | 23.0 | 4/16/2011 06:25:01 | 25.625 |
| 8/17/2010 16:58:00 | 23.0 | 4/16/2011 07:01:01 | 25.625 |
| 8/17/2010 17:33:00 | 23.0 | 4/16/2011 07:37:01 | 25.625 |
| 8/17/2010 18:08:00 | 23.0 | 4/16/2011 08:13:01 | 25.625 |
| 8/17/2010 18:43:00 | 23.0 | 4/16/2011 08:49:01 | 25.625 |
| 8/17/2010 19:18:00 | 23.0 | 4/16/2011 09:25:01 | 25.625 |
| 8/17/2010 19:53:00 | 23.0 | 4/16/2011 10:01:01 | 25.625 |
| 8/17/2010 20:28:00 | 23.5 | 4/16/2011 10:37:01 | 25.625 |
| 8/17/2010 21:03:00 | 23.5 | 4/16/2011 11:13:01 | 25.126 |
| 8/17/2010 21:38:00 | 23.5 | 4/16/2011 11:49:01 | 25.126 |
| 8/17/2010 22:13:00 | 23.5 | 4/16/2011 12:25:01 | 25.126 |
| 8/17/2010 22:48:00 | 23.5 | 4/16/2011 13:01:01 | 25.126 |
| 8/17/2010 23:23:00 | 23.5 | 4/16/2011 13:37:01 | 25.126 |
| 8/17/2010 23:58:00 | 23.5 | 4/16/2011 14:13:01 | 25.126 |
| 8/18/2010 00:33:00 | 23.5 | 4/16/2011 14:49:01 | 25.126 |
| 8/18/2010 01:08:00 | 23.5 | 4/16/2011 15:25:01 | 25.126 |
| 8/18/2010 01:43:00 | 23.0 | 4/16/2011 16:01:01 | 25.625 |
| 8/18/2010 02:18:00 | 23.0 | 4/16/2011 16:37:01 | 25.625 |
| 8/18/2010 02:53:00 | 23.0 | 4/16/2011 17:13:01 | 25.625 |
| 8/18/2010 03:28:00 | 23.0 | 4/16/2011 17:49:01 | 25.625 |
| 8/18/2010 04:03:00 | 23.0 | 4/16/2011 18:25:01 | 25.625 |
| 8/18/2010 04:38:00 | 23.0 | 4/16/2011 19:01:01 | 25.625 |
| 8/18/2010 05:13:00 | 23.0 | 4/16/2011 19:37:01 | 25.625 |
| 8/18/2010 05:48:00 | 23.0 | 4/16/2011 20:13:01 | 25.625 |
| 8/18/2010 06:23:00 | 23.0 | 4/16/2011 20:49:01 | 25.625 |
| 8/18/2010 06:58:00 | 23.0 | 4/16/2011 21:25:01 | 25.625 |
| 8/18/2010 07:33:00 | 23.0 | 4/16/2011 22:01:01 | 25.625 |
| 8/18/2010 08:08:00 | 23.0 | 4/16/2011 22:37:01 | 25.625 |
| 8/18/2010 08:43:00 | 23.0 | 4/16/2011 23:13:01 | 25.625 |
| 8/18/2010 09:18:00 | 23.0 | 4/16/2011 23:49:01 | 25.625 |
| 8/18/2010 09:53:00 | 23.0 | 4/17/2011 00:25:01 | 25.625 |
| 8/18/2010 10:28:00 | 23.0 | 4/17/2011 01:01:01 | 25.625 |
| 8/18/2010 11:03:00 | 23.0 | 4/17/2011 01:37:01 | 25.625 |
| 8/18/2010 11:38:00 | 23.0 | 4/17/2011 02:13:01 | 25.625 |
| 8/18/2010 12:13:00 | 23.0 | 4/17/2011 02:49:01 | 25.625 |
| 8/18/2010 12:48:00 | 23.0 | 4/17/2011 03:25:01 | 25.625 |
| 8/18/2010 13:23:00 | 23.0 | 4/17/2011 04:01:01 | 25.625 |
| 8/18/2010 13:58:00 | 23.0 | 4/17/2011 04:37:01 | 25.625 |
| 8/18/2010 14:33:00 | 23.0 | 4/17/2011 05:13:01 | 25.625 |
| 8/18/2010 15:08:00 | 23.0 | 4/17/2011 05:49:01 | 25.625 |
| 8/18/2010 15:43:00 | 23.0 | 4/17/2011 06:25:01 | 25.625 |
| 8/18/2010 16:18:00 | 23.0 | 4/17/2011 07:01:01 | 25.625 |
| 8/18/2010 16:53:00 | 23.0 | 4/17/2011 07:37:01 | 25.126 |

|                    |      |                    |        |
|--------------------|------|--------------------|--------|
| 8/18/2010 17:28:00 | 23.0 | 4/17/2011 08:13:01 | 25.126 |
| 8/18/2010 18:03:00 | 23.0 | 4/17/2011 08:49:01 | 25.126 |
| 8/18/2010 18:38:00 | 23.0 | 4/17/2011 09:25:01 | 25.126 |
| 8/18/2010 19:13:00 | 23.0 | 4/17/2011 10:01:01 | 25.126 |
| 8/18/2010 19:48:00 | 23.0 | 4/17/2011 10:37:01 | 25.126 |
| 8/18/2010 20:23:00 | 23.0 | 4/17/2011 11:13:01 | 25.126 |
| 8/18/2010 20:58:00 | 23.0 | 4/17/2011 11:49:01 | 25.126 |
| 8/18/2010 21:33:00 | 23.0 | 4/17/2011 12:25:01 | 25.126 |
| 8/18/2010 22:08:00 | 23.0 | 4/17/2011 13:01:01 | 25.625 |
| 8/18/2010 22:43:00 | 23.0 | 4/17/2011 13:37:01 | 25.625 |
| 8/18/2010 23:18:00 | 23.0 | 4/17/2011 14:13:01 | 25.625 |
| 8/18/2010 23:53:00 | 23.0 | 4/17/2011 14:49:01 | 25.625 |
| 8/19/2010 00:28:00 | 23.0 | 4/17/2011 15:25:01 | 25.625 |
| 8/19/2010 01:03:00 | 23.0 | 4/17/2011 16:01:01 | 25.625 |
| 8/19/2010 01:38:00 | 23.0 | 4/17/2011 16:37:01 | 25.126 |
| 8/19/2010 02:13:00 | 23.0 | 4/17/2011 17:13:01 | 25.126 |
| 8/19/2010 02:48:00 | 23.0 | 4/17/2011 17:49:01 | 25.126 |
| 8/19/2010 03:23:00 | 23.0 | 4/17/2011 18:25:01 | 25.126 |
| 8/19/2010 03:58:00 | 23.0 | 4/17/2011 19:01:01 | 25.126 |
| 8/19/2010 04:33:00 | 23.0 | 4/17/2011 19:37:01 | 25.126 |
| 8/19/2010 05:08:00 | 23.0 | 4/17/2011 20:13:01 | 25.126 |
| 8/19/2010 05:43:00 | 23.0 | 4/17/2011 20:49:01 | 25.126 |
| 8/19/2010 06:18:00 | 23.0 | 4/17/2011 21:25:01 | 25.126 |
| 8/19/2010 06:53:00 | 23.0 | 4/17/2011 22:01:01 | 25.625 |
| 8/19/2010 07:28:00 | 23.0 | 4/17/2011 22:37:01 | 25.625 |
| 8/19/2010 08:03:00 | 23.0 | 4/17/2011 23:13:01 | 25.625 |
| 8/19/2010 08:38:00 | 23.0 | 4/17/2011 23:49:01 | 25.625 |
| 8/19/2010 09:13:00 | 23.0 | 4/18/2011 00:25:01 | 25.625 |
| 8/19/2010 09:48:00 | 23.0 | 4/18/2011 01:01:01 | 25.625 |
| 8/19/2010 10:23:00 | 23.0 | 4/18/2011 01:37:01 | 25.625 |
| 8/19/2010 10:58:00 | 23.0 | 4/18/2011 02:13:01 | 25.625 |
| 8/19/2010 11:33:00 | 23.0 | 4/18/2011 02:49:01 | 25.625 |
| 8/19/2010 12:08:00 | 23.0 | 4/18/2011 03:25:01 | 25.625 |
| 8/19/2010 12:43:00 | 23.0 | 4/18/2011 04:01:01 | 25.625 |
| 8/19/2010 13:18:00 | 23.0 | 4/18/2011 04:37:01 | 25.625 |
| 8/19/2010 13:53:00 | 23.0 | 4/18/2011 05:13:01 | 25.625 |
| 8/19/2010 14:28:00 | 23.0 | 4/18/2011 05:49:01 | 25.625 |
| 8/19/2010 15:03:00 | 23.0 | 4/18/2011 06:25:01 | 25.625 |
| 8/19/2010 15:38:00 | 23.0 | 4/18/2011 07:01:01 | 25.625 |
| 8/19/2010 16:13:00 | 23.0 | 4/18/2011 07:37:01 | 25.625 |
| 8/19/2010 16:48:00 | 23.0 | 4/18/2011 08:13:01 | 25.625 |
| 8/19/2010 17:23:00 | 23.0 | 4/18/2011 08:49:01 | 25.625 |
| 8/19/2010 17:58:00 | 23.5 | 4/18/2011 09:25:01 | 25.625 |
| 8/19/2010 18:33:00 | 23.5 | 4/18/2011 10:01:01 | 25.126 |
| 8/19/2010 19:08:00 | 23.5 | 4/18/2011 10:37:01 | 25.625 |
| 8/19/2010 19:43:00 | 23.5 | 4/18/2011 11:13:01 | 25.625 |
| 8/19/2010 20:18:00 | 23.5 | 4/18/2011 11:49:01 | 25.625 |
| 8/19/2010 20:53:00 | 23.5 | 4/18/2011 12:25:01 | 25.625 |
| 8/19/2010 21:28:00 | 23.5 | 4/18/2011 13:01:01 | 25.625 |
| 8/19/2010 22:03:00 | 23.5 | 4/18/2011 13:37:01 | 25.625 |

|                    |      |                    |        |
|--------------------|------|--------------------|--------|
| 8/19/2010 22:38:00 | 23.5 | 4/18/2011 14:13:01 | 25.625 |
| 8/19/2010 23:13:00 | 23.5 | 4/18/2011 14:49:01 | 25.625 |
| 8/19/2010 23:48:00 | 23.5 | 4/18/2011 15:25:01 | 25.625 |
| 8/20/2010 00:23:00 | 23.5 | 4/18/2011 16:01:01 | 25.126 |
| 8/20/2010 00:58:00 | 23.5 | 4/18/2011 16:37:01 | 25.126 |
| 8/20/2010 01:33:00 | 23.5 | 4/18/2011 17:13:01 | 25.126 |
| 8/20/2010 02:08:00 | 23.5 | 4/18/2011 17:49:01 | 25.625 |
| 8/20/2010 02:43:00 | 23.5 | 4/18/2011 18:25:01 | 25.126 |
| 8/20/2010 03:18:00 | 23.5 | 4/18/2011 19:01:01 | 25.625 |
| 8/20/2010 03:53:00 | 23.5 | 4/18/2011 19:37:01 | 25.625 |
| 8/20/2010 04:28:00 | 23.5 | 4/18/2011 20:13:01 | 25.625 |
| 8/20/2010 05:03:00 | 23.5 | 4/18/2011 20:49:01 | 25.625 |
| 8/20/2010 05:38:00 | 23.5 | 4/18/2011 21:25:01 | 25.625 |
| 8/20/2010 06:13:00 | 23.5 | 4/18/2011 22:01:01 | 25.625 |
| 8/20/2010 06:48:00 | 23.5 | 4/18/2011 22:37:01 | 25.625 |
| 8/20/2010 07:23:00 | 23.5 | 4/18/2011 23:13:01 | 25.625 |
| 8/20/2010 07:58:00 | 23.0 | 4/18/2011 23:49:01 | 25.625 |
| 8/20/2010 08:33:00 | 23.0 | 4/19/2011 00:25:01 | 25.625 |
| 8/20/2010 09:08:00 | 23.0 | 4/19/2011 01:01:01 | 25.625 |
| 8/20/2010 09:43:00 | 23.0 | 4/19/2011 01:37:01 | 25.625 |
| 8/20/2010 10:18:00 | 23.0 | 4/19/2011 02:13:01 | 25.625 |
| 8/20/2010 10:53:00 | 23.0 | 4/19/2011 02:49:01 | 25.625 |
| 8/20/2010 11:28:00 | 23.0 | 4/19/2011 03:25:01 | 25.625 |
| 8/20/2010 12:03:00 | 23.0 | 4/19/2011 04:01:01 | 25.625 |
| 8/20/2010 12:38:00 | 23.0 | 4/19/2011 04:37:01 | 25.625 |
| 8/20/2010 13:13:00 | 23.0 | 4/19/2011 05:13:01 | 25.625 |
| 8/20/2010 13:48:00 | 23.0 | 4/19/2011 05:49:01 | 25.625 |
| 8/20/2010 14:23:00 | 23.0 | 4/19/2011 06:25:01 | 25.625 |
| 8/20/2010 14:58:00 | 23.0 | 4/19/2011 07:01:01 | 25.625 |
| 8/20/2010 15:33:00 | 23.0 | 4/19/2011 07:37:01 | 25.625 |
| 8/20/2010 16:08:00 | 23.5 | 4/19/2011 08:13:01 | 25.625 |
| 8/20/2010 16:43:00 | 23.5 | 4/19/2011 08:49:01 | 25.625 |
| 8/20/2010 17:18:00 | 23.5 | 4/19/2011 09:25:01 | 25.625 |
| 8/20/2010 17:53:00 | 23.5 | 4/19/2011 10:01:01 | 25.625 |
| 8/20/2010 18:28:00 | 23.5 | 4/19/2011 10:37:01 | 25.625 |
| 8/20/2010 19:03:00 | 23.5 | 4/19/2011 11:13:01 | 25.625 |
| 8/20/2010 19:38:00 | 23.5 | 4/19/2011 11:49:01 | 25.625 |
| 8/20/2010 20:13:00 | 23.5 | 4/19/2011 12:25:01 | 25.625 |
| 8/20/2010 20:48:00 | 23.5 | 4/19/2011 13:01:01 | 25.625 |
| 8/20/2010 21:23:00 | 23.5 | 4/19/2011 13:37:01 | 25.625 |
| 8/20/2010 21:58:00 | 23.5 | 4/19/2011 14:13:01 | 25.625 |
| 8/20/2010 22:33:00 | 23.5 | 4/19/2011 14:49:01 | 25.625 |
| 8/20/2010 23:08:00 | 23.5 | 4/19/2011 15:25:01 | 25.625 |
| 8/20/2010 23:43:00 | 23.5 | 4/19/2011 16:01:01 | 25.625 |
| 8/21/2010 00:18:00 | 23.5 | 4/19/2011 16:37:01 | 25.625 |
| 8/21/2010 00:53:00 | 23.5 | 4/19/2011 17:13:01 | 25.625 |
| 8/21/2010 01:28:00 | 23.5 | 4/19/2011 17:49:01 | 25.625 |
| 8/21/2010 02:03:00 | 23.5 | 4/19/2011 18:25:01 | 25.625 |
| 8/21/2010 02:38:00 | 23.5 | 4/19/2011 19:01:01 | 25.625 |
| 8/21/2010 03:13:00 | 23.5 | 4/19/2011 19:37:01 | 25.625 |

|                    |      |                    |        |
|--------------------|------|--------------------|--------|
| 8/21/2010 03:48:00 | 23.5 | 4/19/2011 20:13:01 | 25.625 |
| 8/21/2010 04:23:00 | 23.5 | 4/19/2011 20:49:01 | 25.625 |
| 8/21/2010 04:58:00 | 23.5 | 4/19/2011 21:25:01 | 25.625 |
| 8/21/2010 05:33:00 | 23.5 | 4/19/2011 22:01:01 | 25.625 |
| 8/21/2010 06:08:00 | 23.5 | 4/19/2011 22:37:01 | 25.625 |
| 8/21/2010 06:43:00 | 23.5 | 4/19/2011 23:13:01 | 25.625 |
| 8/21/2010 07:18:00 | 23.5 | 4/19/2011 23:49:01 | 25.625 |
| 8/21/2010 07:53:00 | 23.5 | 4/20/2011 00:25:01 | 25.625 |
| 8/21/2010 08:28:00 | 23.5 | 4/20/2011 01:01:01 | 25.625 |
| 8/21/2010 09:03:00 | 23.5 | 4/20/2011 01:37:01 | 25.625 |
| 8/21/2010 09:38:00 | 23.0 | 4/20/2011 02:13:01 | 25.625 |
| 8/21/2010 10:13:00 | 23.0 | 4/20/2011 02:49:01 | 25.625 |
| 8/21/2010 10:48:00 | 23.0 | 4/20/2011 03:25:01 | 25.625 |
| 8/21/2010 11:23:00 | 23.0 | 4/20/2011 04:01:01 | 25.625 |
| 8/21/2010 11:58:00 | 23.0 | 4/20/2011 04:37:01 | 25.625 |
| 8/21/2010 12:33:00 | 23.5 | 4/20/2011 05:13:01 | 25.625 |
| 8/21/2010 13:08:00 | 23.5 | 4/20/2011 05:49:01 | 25.625 |
| 8/21/2010 13:43:00 | 23.5 | 4/20/2011 06:25:01 | 25.625 |
| 8/21/2010 14:18:00 | 23.5 | 4/20/2011 07:01:01 | 26.125 |
| 8/21/2010 14:53:00 | 23.5 | 4/20/2011 07:37:01 | 26.125 |
| 8/21/2010 15:28:00 | 23.5 | 4/20/2011 08:13:01 | 26.125 |
| 8/21/2010 16:03:00 | 23.5 | 4/20/2011 08:49:01 | 26.125 |
| 8/21/2010 16:38:00 | 23.5 | 4/20/2011 09:25:01 | 25.625 |
| 8/21/2010 17:13:00 | 23.5 | 4/20/2011 10:01:01 | 25.625 |
| 8/21/2010 17:48:00 | 23.5 | 4/20/2011 10:37:01 | 25.625 |
| 8/21/2010 18:23:00 | 23.5 | 4/20/2011 11:13:01 | 25.625 |
| 8/21/2010 18:58:00 | 23.5 | 4/20/2011 11:49:01 | 25.625 |
| 8/21/2010 19:33:00 | 23.5 | 4/20/2011 12:25:01 | 25.625 |
| 8/21/2010 20:08:00 | 23.5 | 4/20/2011 13:01:01 | 25.625 |
| 8/21/2010 20:43:00 | 23.5 | 4/20/2011 13:37:01 | 25.625 |
| 8/21/2010 21:18:00 | 23.5 | 4/20/2011 14:13:01 | 25.625 |
| 8/21/2010 21:53:00 | 23.5 | 4/20/2011 14:49:01 | 25.625 |
| 8/21/2010 22:28:00 | 23.5 | 4/20/2011 15:25:01 | 25.625 |
| 8/21/2010 23:03:00 | 23.5 | 4/20/2011 16:01:01 | 25.625 |
| 8/21/2010 23:38:00 | 23.5 | 4/20/2011 16:37:01 | 25.625 |
| 8/22/2010 00:13:00 | 23.5 | 4/20/2011 17:13:01 | 25.625 |
| 8/22/2010 00:48:00 | 23.5 | 4/20/2011 17:49:01 | 25.625 |
| 8/22/2010 01:23:00 | 23.5 | 4/20/2011 18:25:01 | 25.625 |
| 8/22/2010 01:58:00 | 23.5 | 4/20/2011 19:01:01 | 25.625 |
| 8/22/2010 02:33:00 | 23.5 | 4/20/2011 19:37:01 | 25.625 |
| 8/22/2010 03:08:00 | 23.5 | 4/20/2011 20:13:01 | 25.625 |
| 8/22/2010 03:43:00 | 23.5 | 4/20/2011 20:49:01 | 25.625 |
| 8/22/2010 04:18:00 | 23.5 | 4/20/2011 21:25:01 | 25.625 |
| 8/22/2010 04:53:00 | 23.5 | 4/20/2011 22:01:01 | 25.625 |
| 8/22/2010 05:28:00 | 23.5 | 4/20/2011 22:37:01 | 25.625 |
| 8/22/2010 06:03:00 | 23.5 | 4/20/2011 23:13:01 | 25.625 |
| 8/22/2010 06:38:00 | 23.5 | 4/20/2011 23:49:01 | 25.625 |
| 8/22/2010 07:13:00 | 23.5 | 4/21/2011 00:25:01 | 25.625 |
| 8/22/2010 07:48:00 | 23.5 | 4/21/2011 01:01:01 | 25.625 |
| 8/22/2010 08:23:00 | 23.5 | 4/21/2011 01:37:01 | 25.625 |



|                    |      |                    |        |
|--------------------|------|--------------------|--------|
| 8/22/2010 08:58:00 | 23.5 | 4/21/2011 02:13:01 | 25.625 |
| 8/22/2010 09:33:00 | 23.5 | 4/21/2011 02:49:01 | 25.625 |
| 8/22/2010 10:08:00 | 23.5 | 4/21/2011 03:25:01 | 25.625 |
| 8/22/2010 10:43:00 | 23.5 | 4/21/2011 04:01:01 | 25.625 |
| 8/22/2010 11:18:00 | 23.5 | 4/21/2011 04:37:01 | 25.625 |
| 8/22/2010 11:53:00 | 23.5 | 4/21/2011 05:13:01 | 25.625 |
| 8/22/2010 12:28:00 | 23.5 | 4/21/2011 05:49:01 | 25.625 |
| 8/22/2010 13:03:00 | 23.5 | 4/21/2011 06:25:01 | 25.625 |
| 8/22/2010 13:38:00 | 23.5 | 4/21/2011 07:01:01 | 25.625 |
| 8/22/2010 14:13:00 | 23.5 | 4/21/2011 07:37:01 | 25.625 |
| 8/22/2010 14:48:00 | 23.5 | 4/21/2011 08:13:01 | 25.625 |
| 8/22/2010 15:23:00 | 23.5 | 4/21/2011 08:49:01 | 25.625 |
| 8/22/2010 15:58:00 | 23.5 | 4/21/2011 09:25:01 | 25.625 |
| 8/22/2010 16:33:00 | 23.5 | 4/21/2011 10:01:01 | 25.625 |
| 8/22/2010 17:08:00 | 23.5 | 4/21/2011 10:37:01 | 25.625 |
| 8/22/2010 17:43:00 | 23.5 | 4/21/2011 11:13:01 | 25.625 |
| 8/22/2010 18:18:00 | 24.0 | 4/21/2011 11:49:01 | 25.625 |
| 8/22/2010 18:53:00 | 24.0 | 4/21/2011 12:25:01 | 25.625 |
| 8/22/2010 19:28:00 | 24.0 | 4/21/2011 13:01:01 | 25.625 |
| 8/22/2010 20:03:00 | 24.0 | 4/21/2011 13:37:01 | 25.625 |
| 8/22/2010 20:38:00 | 24.0 | 4/21/2011 14:13:01 | 25.625 |
| 8/22/2010 21:13:00 | 24.0 | 4/21/2011 14:49:01 | 25.625 |
| 8/22/2010 21:48:00 | 24.0 | 4/21/2011 15:25:01 | 25.625 |
| 8/22/2010 22:23:00 | 24.0 | 4/21/2011 16:01:01 | 25.625 |
| 8/22/2010 22:58:00 | 24.0 | 4/21/2011 16:37:01 | 25.625 |
| 8/22/2010 23:33:00 | 24.0 | 4/21/2011 17:13:01 | 25.625 |
| 8/23/2010 00:08:00 | 24.0 | 4/21/2011 17:49:01 | 25.625 |
| 8/23/2010 00:43:00 | 24.0 | 4/21/2011 18:25:01 | 25.625 |
| 8/23/2010 01:18:00 | 24.0 | 4/21/2011 19:01:01 | 25.625 |
| 8/23/2010 01:53:00 | 24.0 | 4/21/2011 19:37:01 | 25.625 |
| 8/23/2010 02:28:00 | 23.5 | 4/21/2011 20:13:01 | 25.625 |
| 8/23/2010 03:03:00 | 24.0 | 4/21/2011 20:49:01 | 25.625 |
| 8/23/2010 03:38:00 | 23.5 | 4/21/2011 21:25:01 | 25.625 |
| 8/23/2010 04:13:00 | 23.5 | 4/21/2011 22:01:01 | 25.625 |
| 8/23/2010 04:48:00 | 23.5 | 4/21/2011 22:37:01 | 25.625 |
| 8/23/2010 05:23:00 | 23.5 | 4/21/2011 23:13:01 | 25.625 |
| 8/23/2010 05:58:00 | 23.5 | 4/21/2011 23:49:01 | 25.625 |
| 8/23/2010 06:33:00 | 23.5 | 4/22/2011 00:25:01 | 25.625 |
| 8/23/2010 07:08:00 | 23.5 | 4/22/2011 01:01:01 | 25.625 |
| 8/23/2010 07:43:00 | 23.5 | 4/22/2011 01:37:01 | 25.625 |
| 8/23/2010 08:18:00 | 23.5 | 4/22/2011 02:13:01 | 25.625 |
| 8/23/2010 08:53:00 | 23.5 | 4/22/2011 02:49:01 | 25.625 |
| 8/23/2010 09:28:00 | 23.5 | 4/22/2011 03:25:01 | 25.625 |
| 8/23/2010 10:03:00 | 23.5 | 4/22/2011 04:01:01 | 25.625 |
| 8/23/2010 10:38:00 | 23.5 | 4/22/2011 04:37:01 | 25.625 |
| 8/23/2010 11:13:00 | 23.5 | 4/22/2011 05:13:01 | 25.625 |
| 8/23/2010 11:48:00 | 23.5 | 4/22/2011 05:49:01 | 25.625 |
| 8/23/2010 12:23:00 | 23.5 | 4/22/2011 06:25:01 | 25.625 |
| 8/23/2010 12:58:00 | 23.5 | 4/22/2011 07:01:01 | 25.625 |
| 8/23/2010 13:33:00 | 23.5 | 4/22/2011 07:37:01 | 25.625 |

|                    |      |                    |        |
|--------------------|------|--------------------|--------|
| 8/23/2010 14:08:00 | 23.5 | 4/22/2011 08:13:01 | 25.625 |
| 8/23/2010 14:43:00 | 23.5 | 4/22/2011 08:49:01 | 25.625 |
| 8/23/2010 15:18:00 | 23.5 | 4/22/2011 09:25:01 | 25.625 |
| 8/23/2010 15:53:00 | 23.5 | 4/22/2011 10:01:01 | 25.625 |
| 8/23/2010 16:28:00 | 23.5 | 4/22/2011 10:37:01 | 25.625 |
| 8/23/2010 17:03:00 | 23.5 | 4/22/2011 11:13:01 | 25.625 |
| 8/23/2010 17:38:00 | 23.5 | 4/22/2011 11:49:01 | 25.126 |
| 8/23/2010 18:13:00 | 23.5 | 4/22/2011 12:25:01 | 25.625 |
| 8/23/2010 18:48:00 | 23.5 | 4/22/2011 13:01:01 | 25.126 |
| 8/23/2010 19:23:00 | 23.5 | 4/22/2011 13:37:01 | 25.625 |
| 8/23/2010 19:58:00 | 23.5 | 4/22/2011 14:13:01 | 25.625 |
| 8/23/2010 20:33:00 | 23.5 | 4/22/2011 14:49:01 | 25.625 |
| 8/23/2010 21:08:00 | 23.5 | 4/22/2011 15:25:01 | 25.126 |
| 8/23/2010 21:43:00 | 23.5 | 4/22/2011 16:01:01 | 25.126 |
| 8/23/2010 22:18:00 | 23.5 | 4/22/2011 16:37:01 | 25.126 |
| 8/23/2010 22:53:00 | 23.5 | 4/22/2011 17:13:01 | 25.126 |
| 8/23/2010 23:28:00 | 23.5 | 4/22/2011 17:49:01 | 25.625 |
| 8/24/2010 00:03:00 | 23.5 | 4/22/2011 18:25:01 | 25.625 |
| 8/24/2010 00:38:00 | 23.5 | 4/22/2011 19:01:01 | 25.625 |
| 8/24/2010 01:13:00 | 23.5 | 4/22/2011 19:37:01 | 25.625 |
| 8/24/2010 01:48:00 | 23.5 | 4/22/2011 20:13:01 | 25.625 |
| 8/24/2010 02:23:00 | 23.5 | 4/22/2011 20:49:01 | 25.625 |
| 8/24/2010 02:58:00 | 23.5 | 4/22/2011 21:25:01 | 25.625 |
| 8/24/2010 03:33:00 | 23.5 | 4/22/2011 22:01:01 | 25.625 |
| 8/24/2010 04:08:00 | 23.5 | 4/22/2011 22:37:01 | 25.625 |
| 8/24/2010 04:43:00 | 23.5 | 4/22/2011 23:13:01 | 25.625 |
| 8/24/2010 05:18:00 | 23.5 | 4/22/2011 23:49:01 | 25.625 |
| 8/24/2010 05:53:00 | 23.5 | 4/23/2011 00:25:01 | 25.625 |
| 8/24/2010 06:28:00 | 23.5 | 4/23/2011 01:01:01 | 25.625 |
| 8/24/2010 07:03:00 | 23.5 | 4/23/2011 01:37:01 | 25.625 |
| 8/24/2010 07:38:00 | 23.5 | 4/23/2011 02:13:01 | 25.625 |
| 8/24/2010 08:13:00 | 23.5 | 4/23/2011 02:49:01 | 25.625 |
| 8/24/2010 08:48:00 | 23.5 | 4/23/2011 03:25:01 | 25.625 |
| 8/24/2010 09:23:00 | 23.5 | 4/23/2011 04:01:01 | 25.625 |
| 8/24/2010 09:58:00 | 23.5 | 4/23/2011 04:37:01 | 25.625 |
| 8/24/2010 10:33:00 | 23.5 | 4/23/2011 05:13:01 | 25.625 |
| 8/24/2010 11:08:00 | 23.5 | 4/23/2011 05:49:01 | 25.625 |
| 8/24/2010 11:43:00 | 23.5 | 4/23/2011 06:25:01 | 25.625 |
| 8/24/2010 12:18:00 | 23.5 | 4/23/2011 07:01:01 | 25.625 |
| 8/24/2010 12:53:00 | 23.5 | 4/23/2011 07:37:01 | 25.625 |
| 8/24/2010 13:28:00 | 23.5 | 4/23/2011 08:13:01 | 25.625 |
| 8/24/2010 14:03:00 | 23.5 | 4/23/2011 08:49:01 | 25.625 |
| 8/24/2010 14:38:00 | 23.5 | 4/23/2011 09:25:01 | 25.625 |
| 8/24/2010 15:13:00 | 23.5 | 4/23/2011 10:01:01 | 25.625 |
| 8/24/2010 15:48:00 | 23.5 | 4/23/2011 10:37:01 | 25.625 |
| 8/24/2010 16:23:00 | 23.5 | 4/23/2011 11:13:01 | 25.625 |
| 8/24/2010 16:58:00 | 24.0 | 4/23/2011 11:49:01 | 25.625 |
| 8/24/2010 17:33:00 | 24.0 | 4/23/2011 12:25:01 | 25.625 |
| 8/24/2010 18:08:00 | 24.0 | 4/23/2011 13:01:01 | 25.625 |
| 8/24/2010 18:43:00 | 24.0 | 4/23/2011 13:37:01 | 25.625 |

|                    |      |                    |        |
|--------------------|------|--------------------|--------|
| 8/24/2010 19:18:00 | 24.0 | 4/23/2011 14:13:01 | 25.625 |
| 8/24/2010 19:53:00 | 24.0 | 4/23/2011 14:49:01 | 25.625 |
| 8/24/2010 20:28:00 | 24.0 | 4/23/2011 15:25:01 | 25.625 |
| 8/24/2010 21:03:00 | 24.0 | 4/23/2011 16:01:01 | 25.625 |
| 8/24/2010 21:38:00 | 24.0 | 4/23/2011 16:37:01 | 25.625 |
| 8/24/2010 22:13:00 | 24.0 | 4/23/2011 17:13:01 | 25.625 |
| 8/24/2010 22:48:00 | 24.0 | 4/23/2011 17:49:01 | 25.625 |
| 8/24/2010 23:23:00 | 24.0 | 4/23/2011 18:25:01 | 25.625 |
| 8/24/2010 23:58:00 | 24.0 | 4/23/2011 19:01:01 | 25.625 |
| 8/25/2010 00:33:00 | 24.0 | 4/23/2011 19:37:01 | 25.625 |
| 8/25/2010 01:08:00 | 24.0 | 4/23/2011 20:13:01 | 25.625 |
| 8/25/2010 01:43:00 | 24.0 | 4/23/2011 20:49:01 | 25.625 |
| 8/25/2010 02:18:00 | 23.5 | 4/23/2011 21:25:01 | 25.625 |
| 8/25/2010 02:53:00 | 23.5 | 4/23/2011 22:01:01 | 25.625 |
| 8/25/2010 03:28:00 | 23.5 | 4/23/2011 22:37:01 | 25.625 |
| 8/25/2010 04:03:00 | 23.5 | 4/23/2011 23:13:01 | 25.625 |
| 8/25/2010 04:38:00 | 23.5 | 4/23/2011 23:49:01 | 25.625 |
| 8/25/2010 05:13:00 | 23.5 | 4/24/2011 00:25:01 | 25.625 |
| 8/25/2010 05:48:00 | 23.5 | 4/24/2011 01:01:01 | 25.625 |
| 8/25/2010 06:23:00 | 23.5 | 4/24/2011 01:37:01 | 25.625 |
| 8/25/2010 06:58:00 | 23.5 | 4/24/2011 02:13:01 | 25.625 |
| 8/25/2010 07:33:00 | 23.5 | 4/24/2011 02:49:01 | 25.625 |
| 8/25/2010 08:08:00 | 23.5 | 4/24/2011 03:25:01 | 25.625 |
| 8/25/2010 08:43:00 | 23.5 | 4/24/2011 04:01:01 | 25.625 |
| 8/25/2010 09:18:00 | 23.5 | 4/24/2011 04:37:01 | 25.625 |
| 8/25/2010 09:53:00 | 23.5 | 4/24/2011 05:13:01 | 25.625 |
| 8/25/2010 10:28:00 | 23.5 | 4/24/2011 05:49:01 | 25.625 |
| 8/25/2010 11:03:00 | 23.5 | 4/24/2011 06:25:01 | 25.625 |
| 8/25/2010 11:38:00 | 23.5 | 4/24/2011 07:01:01 | 25.625 |
| 8/25/2010 12:13:00 | 23.5 | 4/24/2011 07:37:01 | 25.625 |
| 8/25/2010 12:48:00 | 23.5 | 4/24/2011 08:13:01 | 25.625 |
| 8/25/2010 13:23:00 | 23.5 | 4/24/2011 08:49:01 | 25.625 |
| 8/25/2010 13:58:00 | 23.5 | 4/24/2011 09:25:01 | 25.625 |
| 8/25/2010 14:33:00 | 23.5 | 4/24/2011 10:01:01 | 25.625 |
| 8/25/2010 15:08:00 | 23.5 | 4/24/2011 10:37:01 | 25.625 |
| 8/25/2010 15:43:00 | 23.5 | 4/24/2011 11:13:01 | 25.625 |
| 8/25/2010 16:18:00 | 23.5 | 4/24/2011 11:49:01 | 25.625 |
| 8/25/2010 16:53:00 | 23.5 | 4/24/2011 12:25:01 | 25.625 |
| 8/25/2010 17:28:00 | 23.5 | 4/24/2011 13:01:01 | 25.625 |
| 8/25/2010 18:03:00 | 23.5 | 4/24/2011 13:37:01 | 25.625 |
| 8/25/2010 18:38:00 | 23.5 | 4/24/2011 14:13:01 | 25.625 |
| 8/25/2010 19:13:00 | 23.5 | 4/24/2011 14:49:01 | 25.625 |
| 8/25/2010 19:48:00 | 23.5 | 4/24/2011 15:25:01 | 25.625 |
| 8/25/2010 20:23:00 | 23.5 | 4/24/2011 16:01:01 | 25.625 |
| 8/25/2010 20:58:00 | 23.5 | 4/24/2011 16:37:01 | 25.625 |
| 8/25/2010 21:33:00 | 23.5 | 4/24/2011 17:13:01 | 25.625 |
| 8/25/2010 22:08:00 | 23.5 | 4/24/2011 17:49:01 | 25.625 |
| 8/25/2010 22:43:00 | 23.5 | 4/24/2011 18:25:01 | 25.625 |
| 8/25/2010 23:18:00 | 23.5 | 4/24/2011 19:01:01 | 25.625 |
| 8/25/2010 23:53:00 | 23.5 | 4/24/2011 19:37:01 | 25.625 |

|                    |      |                    |        |
|--------------------|------|--------------------|--------|
| 8/26/2010 00:28:00 | 23.5 | 4/24/2011 20:13:01 | 25.625 |
| 8/26/2010 01:03:00 | 23.5 | 4/24/2011 20:49:01 | 25.625 |
| 8/26/2010 01:38:00 | 23.5 | 4/24/2011 21:25:01 | 25.625 |
| 8/26/2010 02:13:00 | 23.5 | 4/24/2011 22:01:01 | 25.625 |
| 8/26/2010 02:48:00 | 23.5 | 4/24/2011 22:37:01 | 25.625 |
| 8/26/2010 03:23:00 | 23.5 | 4/24/2011 23:13:01 | 25.625 |
| 8/26/2010 03:58:00 | 23.5 | 4/24/2011 23:49:01 | 25.625 |
| 8/26/2010 04:33:00 | 23.5 | 4/25/2011 00:25:01 | 25.625 |
| 8/26/2010 05:08:00 | 23.5 | 4/25/2011 01:01:01 | 25.625 |
| 8/26/2010 05:43:00 | 23.5 | 4/25/2011 01:37:01 | 25.625 |
| 8/26/2010 06:18:00 | 23.5 | 4/25/2011 02:13:01 | 25.625 |
| 8/26/2010 06:53:00 | 23.5 | 4/25/2011 02:49:01 | 25.625 |
| 8/26/2010 07:28:00 | 23.5 | 4/25/2011 03:25:01 | 25.625 |
| 8/26/2010 08:03:00 | 23.5 | 4/25/2011 04:01:01 | 25.625 |
| 8/26/2010 08:38:00 | 23.0 | 4/25/2011 04:37:01 | 25.625 |
| 8/26/2010 09:13:00 | 23.0 | 4/25/2011 05:13:01 | 25.625 |
| 8/26/2010 09:48:00 | 23.0 | 4/25/2011 05:49:01 | 25.625 |
| 8/26/2010 10:23:00 | 23.0 | 4/25/2011 06:25:01 | 25.625 |
| 8/26/2010 10:58:00 | 23.0 | 4/25/2011 07:01:01 | 25.625 |
| 8/26/2010 11:33:00 | 23.0 | 4/25/2011 07:37:01 | 25.625 |
| 8/26/2010 12:08:00 | 23.0 | 4/25/2011 08:13:01 | 25.625 |
| 8/26/2010 12:43:00 | 23.0 | 4/25/2011 08:49:01 | 25.625 |
| 8/26/2010 13:18:00 | 23.0 | 4/25/2011 09:25:01 | 25.625 |
| 8/26/2010 13:53:00 | 23.0 | 4/25/2011 10:01:01 | 25.625 |
| 8/26/2010 14:28:00 | 23.0 | 4/25/2011 10:37:01 | 25.625 |
| 8/26/2010 15:03:00 | 23.0 | 4/25/2011 11:13:01 | 25.625 |
| 8/26/2010 15:38:00 | 23.0 | 4/25/2011 11:49:01 | 25.625 |
| 8/26/2010 16:13:00 | 23.0 | 4/25/2011 12:25:01 | 25.625 |
| 8/26/2010 16:48:00 | 23.0 | 4/25/2011 13:01:01 | 25.625 |
| 8/26/2010 17:23:00 | 23.5 | 4/25/2011 13:37:01 | 25.625 |
| 8/26/2010 17:58:00 | 23.5 | 4/25/2011 14:13:01 | 25.625 |
| 8/26/2010 18:33:00 | 23.5 | 4/25/2011 14:49:01 | 25.625 |
| 8/26/2010 19:08:00 | 23.5 | 4/25/2011 15:25:01 | 25.625 |
| 8/26/2010 19:43:00 | 23.5 | 4/25/2011 16:01:01 | 25.625 |
| 8/26/2010 20:18:00 | 23.5 | 4/25/2011 16:37:01 | 25.625 |
| 8/26/2010 20:53:00 | 23.5 | 4/25/2011 17:13:01 | 25.625 |
| 8/26/2010 21:28:00 | 23.5 | 4/25/2011 17:49:01 | 25.625 |
| 8/26/2010 22:03:00 | 23.5 | 4/25/2011 18:25:01 | 25.625 |
| 8/26/2010 22:38:00 | 23.5 | 4/25/2011 19:01:01 | 25.625 |
| 8/26/2010 23:13:00 | 23.5 | 4/25/2011 19:37:01 | 25.625 |
| 8/26/2010 23:48:00 | 23.5 | 4/25/2011 20:13:01 | 25.625 |
| 8/27/2010 00:23:00 | 23.5 | 4/25/2011 20:49:01 | 25.625 |
| 8/27/2010 00:58:00 | 23.5 | 4/25/2011 21:25:01 | 25.625 |
| 8/27/2010 01:33:00 | 23.5 | 4/25/2011 22:01:01 | 25.625 |
| 8/27/2010 02:08:00 | 23.5 | 4/25/2011 22:37:01 | 25.625 |
| 8/27/2010 02:43:00 | 23.5 | 4/25/2011 23:13:01 | 25.625 |
| 8/27/2010 03:18:00 | 23.5 | 4/25/2011 23:49:01 | 25.625 |
| 8/27/2010 03:53:00 | 23.5 | 4/26/2011 00:25:01 | 25.625 |
| 8/27/2010 04:28:00 | 23.0 | 4/26/2011 01:01:01 | 25.625 |
| 8/27/2010 05:03:00 | 23.0 | 4/26/2011 01:37:01 | 25.625 |

|                    |      |                    |        |
|--------------------|------|--------------------|--------|
| 8/27/2010 05:38:00 | 23.0 | 4/26/2011 02:13:01 | 25.625 |
| 8/27/2010 06:13:00 | 23.0 | 4/26/2011 02:49:01 | 25.625 |
| 8/27/2010 06:48:00 | 23.0 | 4/26/2011 03:25:01 | 25.625 |
| 8/27/2010 07:23:00 | 23.0 | 4/26/2011 04:01:01 | 25.625 |
| 8/27/2010 07:58:00 | 23.0 | 4/26/2011 04:37:01 | 25.625 |
| 8/27/2010 08:33:00 | 23.0 | 4/26/2011 05:13:01 | 25.625 |
| 8/27/2010 09:08:00 | 23.0 | 4/26/2011 05:49:01 | 25.625 |
| 8/27/2010 09:43:00 | 23.0 | 4/26/2011 06:25:01 | 25.625 |
| 8/27/2010 10:18:00 | 23.0 | 4/26/2011 07:01:01 | 25.625 |
| 8/27/2010 10:53:00 | 23.0 | 4/26/2011 07:37:01 | 25.625 |
| 8/27/2010 11:28:00 | 23.0 | 4/26/2011 08:13:01 | 25.625 |
| 8/27/2010 12:03:00 | 23.0 | 4/26/2011 08:49:01 | 25.625 |
| 8/27/2010 12:38:00 | 23.0 | 4/26/2011 09:25:01 | 25.625 |
| 8/27/2010 13:13:00 | 23.0 | 4/26/2011 10:01:01 | 25.625 |
| 8/27/2010 13:48:00 | 23.0 | 4/26/2011 10:37:01 | 25.625 |
| 8/27/2010 14:23:00 | 23.0 | 4/26/2011 11:13:01 | 25.625 |
| 8/27/2010 14:58:00 | 23.0 | 4/26/2011 11:49:01 | 25.625 |
| 8/27/2010 15:33:00 | 23.0 | 4/26/2011 12:25:01 | 25.625 |
| 8/27/2010 16:08:00 | 23.0 | 4/26/2011 13:01:01 | 25.625 |
| 8/27/2010 16:43:00 | 23.0 | 4/26/2011 13:37:01 | 25.625 |
| 8/27/2010 17:18:00 | 23.0 | 4/26/2011 14:13:01 | 25.625 |
| 8/27/2010 17:53:00 | 23.5 | 4/26/2011 14:49:01 | 25.625 |
| 8/27/2010 18:28:00 | 23.5 | 4/26/2011 15:25:01 | 25.625 |
| 8/27/2010 19:03:00 | 23.5 | 4/26/2011 16:01:01 | 25.625 |
| 8/27/2010 19:38:00 | 23.5 | 4/26/2011 16:37:01 | 25.625 |
| 8/27/2010 20:13:00 | 23.5 | 4/26/2011 17:13:01 | 25.625 |
| 8/27/2010 20:48:00 | 23.5 | 4/26/2011 17:49:01 | 25.625 |
| 8/27/2010 21:23:00 | 23.5 | 4/26/2011 18:25:01 | 25.625 |
| 8/27/2010 21:58:00 | 23.5 | 4/26/2011 19:01:01 | 25.625 |
| 8/27/2010 22:33:00 | 23.5 | 4/26/2011 19:37:01 | 25.625 |
| 8/27/2010 23:08:00 | 23.5 | 4/26/2011 20:13:01 | 25.625 |
| 8/27/2010 23:43:00 | 23.5 | 4/26/2011 20:49:01 | 25.625 |
| 8/28/2010 00:18:00 | 23.5 | 4/26/2011 21:25:01 | 25.625 |
| 8/28/2010 00:53:00 | 23.5 | 4/26/2011 22:01:01 | 25.625 |
| 8/28/2010 01:28:00 | 23.5 | 4/26/2011 22:37:01 | 25.625 |
| 8/28/2010 02:03:00 | 23.5 | 4/26/2011 23:13:01 | 25.625 |
| 8/28/2010 02:38:00 | 23.5 | 4/26/2011 23:49:01 | 25.625 |
| 8/28/2010 03:13:00 | 23.5 | 4/27/2011 00:25:01 | 26.125 |
| 8/28/2010 03:48:00 | 23.5 | 4/27/2011 01:01:01 | 26.125 |
| 8/28/2010 04:23:00 | 23.5 | 4/27/2011 01:37:01 | 26.125 |
| 8/28/2010 04:58:00 | 23.5 | 4/27/2011 02:13:01 | 26.125 |
| 8/28/2010 05:33:00 | 23.5 | 4/27/2011 02:49:01 | 26.125 |
| 8/28/2010 06:08:00 | 23.5 | 4/27/2011 03:25:01 | 25.625 |
| 8/28/2010 06:43:00 | 23.0 | 4/27/2011 04:01:01 | 25.625 |
| 8/28/2010 07:18:00 | 23.0 | 4/27/2011 04:37:01 | 25.625 |
| 8/28/2010 07:53:00 | 23.0 | 4/27/2011 05:13:01 | 25.625 |
| 8/28/2010 08:28:00 | 23.0 | 4/27/2011 05:49:01 | 25.625 |
| 8/28/2010 09:03:00 | 23.0 | 4/27/2011 06:25:01 | 25.625 |
| 8/28/2010 09:38:00 | 23.0 | 4/27/2011 07:01:01 | 25.625 |
| 8/28/2010 10:13:00 | 23.0 | 4/27/2011 07:37:01 | 25.625 |

|                    |      |                    |        |
|--------------------|------|--------------------|--------|
| 8/28/2010 10:48:00 | 23.0 | 4/27/2011 08:13:01 | 25.625 |
| 8/28/2010 11:23:00 | 23.0 | 4/27/2011 08:49:01 | 25.625 |
| 8/28/2010 11:58:00 | 23.0 | 4/27/2011 09:25:01 | 25.625 |
| 8/28/2010 12:33:00 | 23.0 | 4/27/2011 10:01:01 | 25.625 |
| 8/28/2010 13:08:00 | 23.0 | 4/27/2011 10:37:01 | 25.625 |
| 8/28/2010 13:43:00 | 23.0 | 4/27/2011 11:13:01 | 25.625 |
| 8/28/2010 14:18:00 | 23.0 | 4/27/2011 11:49:01 | 25.625 |
| 8/28/2010 14:53:00 | 23.0 | 4/27/2011 12:25:01 | 25.625 |
| 8/28/2010 15:28:00 | 23.0 | 4/27/2011 13:01:01 | 25.625 |
| 8/28/2010 16:03:00 | 23.0 | 4/27/2011 13:37:01 | 25.625 |
| 8/28/2010 16:38:00 | 23.0 | 4/27/2011 14:13:01 | 25.625 |
| 8/28/2010 17:13:00 | 23.0 | 4/27/2011 14:49:01 | 25.625 |
| 8/28/2010 17:48:00 | 23.5 | 4/27/2011 15:25:01 | 25.625 |
| 8/28/2010 18:23:00 | 23.5 | 4/27/2011 16:01:01 | 25.625 |
| 8/28/2010 18:58:00 | 23.5 | 4/27/2011 16:37:01 | 25.625 |
| 8/28/2010 19:33:00 | 23.5 | 4/27/2011 17:13:01 | 25.625 |
| 8/28/2010 20:08:00 | 23.5 | 4/27/2011 17:49:01 | 25.625 |
| 8/28/2010 20:43:00 | 23.5 | 4/27/2011 18:25:01 | 25.625 |
| 8/28/2010 21:18:00 | 23.5 | 4/27/2011 19:01:01 | 25.625 |
| 8/28/2010 21:53:00 | 23.5 | 4/27/2011 19:37:01 | 25.625 |
| 8/28/2010 22:28:00 | 23.5 | 4/27/2011 20:13:01 | 25.625 |
| 8/28/2010 23:03:00 | 23.5 | 4/27/2011 20:49:01 | 25.625 |
| 8/28/2010 23:38:00 | 23.5 | 4/27/2011 21:25:01 | 25.625 |
| 8/29/2010 00:13:00 | 23.5 | 4/27/2011 22:01:01 | 25.625 |
| 8/29/2010 00:48:00 | 23.5 | 4/27/2011 22:37:01 | 25.625 |
| 8/29/2010 01:23:00 | 23.5 | 4/27/2011 23:13:01 | 25.625 |
| 8/29/2010 01:58:00 | 23.5 | 4/27/2011 23:49:01 | 25.625 |
| 8/29/2010 02:33:00 | 23.5 | 4/28/2011 00:25:01 | 25.625 |
| 8/29/2010 03:08:00 | 23.5 | 4/28/2011 01:01:01 | 25.625 |
| 8/29/2010 03:43:00 | 23.5 | 4/28/2011 01:37:01 | 25.625 |
| 8/29/2010 04:18:00 | 23.5 | 4/28/2011 02:13:01 | 25.625 |
| 8/29/2010 04:53:00 | 23.5 | 4/28/2011 02:49:01 | 25.625 |
| 8/29/2010 05:28:00 | 23.5 | 4/28/2011 03:25:01 | 25.625 |
| 8/29/2010 06:03:00 | 23.5 | 4/28/2011 04:01:01 | 25.625 |
| 8/29/2010 06:38:00 | 23.0 | 4/28/2011 04:37:01 | 25.625 |
| 8/29/2010 07:13:00 | 23.0 | 4/28/2011 05:13:01 | 25.625 |
| 8/29/2010 07:48:00 | 23.0 | 4/28/2011 05:49:01 | 25.625 |
| 8/29/2010 08:23:00 | 23.0 | 4/28/2011 06:25:01 | 25.625 |
| 8/29/2010 08:58:00 | 23.0 | 4/28/2011 07:01:01 | 25.625 |
| 8/29/2010 09:33:00 | 23.0 | 4/28/2011 07:37:01 | 25.625 |
| 8/29/2010 10:08:00 | 23.0 | 4/28/2011 08:13:01 | 25.625 |
| 8/29/2010 10:43:00 | 23.0 | 4/28/2011 08:49:01 | 25.625 |
| 8/29/2010 11:18:00 | 23.0 | 4/28/2011 09:25:01 | 25.625 |
| 8/29/2010 11:53:00 | 23.0 | 4/28/2011 10:01:01 | 25.126 |
| 8/29/2010 12:28:00 | 23.0 | 4/28/2011 10:37:01 | 25.126 |
| 8/29/2010 13:03:00 | 23.0 | 4/28/2011 11:13:01 | 25.126 |
| 8/29/2010 13:38:00 | 23.0 | 4/28/2011 11:49:01 | 25.126 |
| 8/29/2010 14:13:00 | 23.0 | 4/28/2011 12:25:01 | 25.126 |
| 8/29/2010 14:48:00 | 23.0 | 4/28/2011 13:01:01 | 25.126 |
| 8/29/2010 15:23:00 | 23.5 | 4/28/2011 13:37:01 | 25.126 |

|                    |      |                    |        |
|--------------------|------|--------------------|--------|
| 8/29/2010 15:58:00 | 23.5 | 4/28/2011 14:13:01 | 25.126 |
| 8/29/2010 16:33:00 | 23.5 | 4/28/2011 14:49:01 | 25.126 |
| 8/29/2010 17:08:00 | 23.5 | 4/28/2011 15:25:01 | 25.126 |
| 8/29/2010 17:43:00 | 23.5 | 4/28/2011 16:01:01 | 25.126 |
| 8/29/2010 18:18:00 | 23.5 | 4/28/2011 16:37:01 | 25.126 |
| 8/29/2010 18:53:00 | 23.5 | 4/28/2011 17:13:01 | 25.126 |
| 8/29/2010 19:28:00 | 23.5 | 4/28/2011 17:49:01 | 25.126 |
| 8/29/2010 20:03:00 | 23.5 | 4/28/2011 18:25:01 | 25.126 |
| 8/29/2010 20:38:00 | 23.5 | 4/28/2011 19:01:01 | 25.625 |
| 8/29/2010 21:13:00 | 23.5 | 4/28/2011 19:37:01 | 25.126 |
| 8/29/2010 21:48:00 | 23.5 | 4/28/2011 20:13:01 | 25.625 |
| 8/29/2010 22:23:00 | 23.5 | 4/28/2011 20:49:01 | 25.625 |
| 8/29/2010 22:58:00 | 23.5 | 4/28/2011 21:25:01 | 25.625 |
| 8/29/2010 23:33:00 | 23.5 | 4/28/2011 22:01:01 | 25.625 |
| 8/30/2010 00:08:00 | 23.5 | 4/28/2011 22:37:01 | 25.625 |
| 8/30/2010 00:43:00 | 23.5 | 4/28/2011 23:13:01 | 25.625 |
| 8/30/2010 01:18:00 | 23.5 | 4/28/2011 23:49:01 | 25.625 |
| 8/30/2010 01:53:00 | 23.5 | 4/29/2011 00:25:01 | 25.625 |
| 8/30/2010 02:28:00 | 23.5 | 4/29/2011 01:01:01 | 25.625 |
| 8/30/2010 03:03:00 | 23.5 | 4/29/2011 01:37:01 | 25.625 |
| 8/30/2010 03:38:00 | 23.5 | 4/29/2011 02:13:01 | 25.625 |
| 8/30/2010 04:13:00 | 23.5 | 4/29/2011 02:49:01 | 25.625 |
| 8/30/2010 04:48:00 | 23.5 | 4/29/2011 03:25:01 | 25.625 |
| 8/30/2010 05:23:00 | 23.5 | 4/29/2011 04:01:01 | 25.625 |
| 8/30/2010 05:58:00 | 23.5 | 4/29/2011 04:37:01 | 25.625 |
| 8/30/2010 06:33:00 | 23.5 | 4/29/2011 05:13:01 | 25.625 |
| 8/30/2010 07:08:00 | 23.5 | 4/29/2011 05:49:01 | 25.625 |
| 8/30/2010 07:43:00 | 23.5 | 4/29/2011 06:25:01 | 25.625 |
| 8/30/2010 08:18:00 | 23.5 | 4/29/2011 07:01:01 | 25.625 |
| 8/30/2010 08:53:00 | 23.5 | 4/29/2011 07:37:01 | 25.625 |
| 8/30/2010 09:28:00 | 23.5 | 4/29/2011 08:13:01 | 25.625 |
| 8/30/2010 10:03:00 | 23.5 | 4/29/2011 08:49:01 | 25.625 |
| 8/30/2010 10:38:00 | 23.5 | 4/29/2011 09:25:01 | 25.625 |
| 8/30/2010 11:13:00 | 23.5 | 4/29/2011 10:01:01 | 25.126 |
| 8/30/2010 11:48:00 | 23.5 | 4/29/2011 10:37:01 | 25.126 |
| 8/30/2010 12:23:00 | 23.5 | 4/29/2011 11:13:01 | 25.126 |
| 8/30/2010 12:58:00 | 23.5 | 4/29/2011 11:49:01 | 25.126 |
| 8/30/2010 13:33:00 | 23.5 | 4/29/2011 12:25:01 | 25.126 |
| 8/30/2010 14:08:00 | 23.5 | 4/29/2011 13:01:01 | 25.126 |
| 8/30/2010 14:43:00 | 23.5 | 4/29/2011 13:37:01 | 25.126 |
| 8/30/2010 15:18:00 | 23.5 | 4/29/2011 14:13:01 | 25.126 |
| 8/30/2010 15:53:00 | 23.5 | 4/29/2011 14:49:01 | 25.126 |
| 8/30/2010 16:28:00 | 23.5 | 4/29/2011 15:25:01 | 25.126 |
| 8/30/2010 17:03:00 | 23.5 | 4/29/2011 16:01:01 | 25.126 |
| 8/30/2010 17:38:00 | 23.5 | 4/29/2011 16:37:01 | 25.126 |
| 8/30/2010 18:13:00 | 23.5 | 4/29/2011 17:13:01 | 25.126 |
| 8/30/2010 18:48:00 | 23.5 | 4/29/2011 17:49:01 | 25.126 |
| 8/30/2010 19:23:00 | 23.5 | 4/29/2011 18:25:01 | 25.126 |
| 8/30/2010 19:58:00 | 23.5 | 4/29/2011 19:01:01 | 25.625 |
| 8/30/2010 20:33:00 | 23.5 | 4/29/2011 19:37:01 | 25.625 |

|                    |      |                    |        |
|--------------------|------|--------------------|--------|
| 8/30/2010 21:08:00 | 23.5 | 4/29/2011 20:13:01 | 25.625 |
| 8/30/2010 21:43:00 | 23.5 | 4/29/2011 20:49:01 | 25.625 |
| 8/30/2010 22:18:00 | 23.5 | 4/29/2011 21:25:01 | 25.625 |
| 8/30/2010 22:53:00 | 23.5 | 4/29/2011 22:01:01 | 25.625 |
| 8/30/2010 23:28:00 | 23.5 | 4/29/2011 22:37:01 | 25.625 |
| 8/31/2010 00:03:00 | 23.5 | 4/29/2011 23:13:01 | 25.625 |
| 8/31/2010 00:38:00 | 23.5 | 4/29/2011 23:49:01 | 25.625 |
| 8/31/2010 01:13:00 | 23.5 | 4/30/2011 00:25:01 | 25.625 |
| 8/31/2010 01:48:00 | 24.0 | 4/30/2011 01:01:01 | 25.625 |
| 8/31/2010 02:23:00 | 24.0 | 4/30/2011 01:37:01 | 25.625 |
| 8/31/2010 02:58:00 | 23.5 | 4/30/2011 02:13:01 | 25.625 |
| 8/31/2010 03:33:00 | 23.5 | 4/30/2011 02:49:01 | 25.625 |
| 8/31/2010 04:08:00 | 23.5 | 4/30/2011 03:25:01 | 25.126 |
| 8/31/2010 04:43:00 | 23.5 | 4/30/2011 04:01:01 | 25.126 |
| 8/31/2010 05:18:00 | 23.5 | 4/30/2011 04:37:01 | 25.126 |
| 8/31/2010 05:53:00 | 23.5 | 4/30/2011 05:13:01 | 25.126 |
| 8/31/2010 06:28:00 | 23.5 | 4/30/2011 05:49:01 | 25.126 |
| 8/31/2010 07:03:00 | 23.5 | 4/30/2011 06:25:01 | 25.126 |
| 8/31/2010 07:38:00 | 23.5 | 4/30/2011 07:01:01 | 25.126 |
| 8/31/2010 08:13:00 | 23.5 | 4/30/2011 07:37:01 | 25.126 |
| 8/31/2010 08:48:00 | 23.5 | 4/30/2011 08:13:01 | 25.126 |
| 8/31/2010 09:23:00 | 23.5 | 4/30/2011 08:49:01 | 25.126 |
| 8/31/2010 09:58:00 | 23.5 | 4/30/2011 09:25:01 | 25.126 |
| 8/31/2010 10:33:00 | 23.5 | 4/30/2011 10:01:01 | 25.126 |
| 8/31/2010 11:08:00 | 23.5 | 4/30/2011 10:37:01 | 25.126 |
| 8/31/2010 11:43:00 | 23.5 | 4/30/2011 11:13:01 | 25.126 |
| 8/31/2010 12:18:00 | 23.5 | 4/30/2011 11:49:01 | 25.126 |
| 8/31/2010 12:53:00 | 23.5 | 4/30/2011 12:25:01 | 25.126 |
| 8/31/2010 13:28:00 | 23.5 | 4/30/2011 13:01:01 | 25.126 |
| 8/31/2010 14:03:00 | 23.5 | 4/30/2011 13:37:01 | 25.126 |
| 8/31/2010 14:38:00 | 23.5 | 4/30/2011 14:13:01 | 25.126 |
| 8/31/2010 15:13:00 | 23.5 | 4/30/2011 14:49:01 | 25.126 |
| 8/31/2010 15:48:00 | 23.5 | 4/30/2011 15:25:01 | 25.126 |
| 8/31/2010 16:23:00 | 23.5 | 4/30/2011 16:01:01 | 25.126 |
| 8/31/2010 16:58:00 | 23.5 | 4/30/2011 16:37:01 | 25.126 |
| 8/31/2010 17:33:00 | 23.5 | 4/30/2011 17:13:01 | 25.126 |
| 8/31/2010 18:08:00 | 23.5 | 4/30/2011 17:49:01 | 25.126 |
| 8/31/2010 18:43:00 | 23.5 | 4/30/2011 18:25:01 | 25.126 |
| 8/31/2010 19:18:00 | 23.5 | 4/30/2011 19:01:01 | 25.126 |
| 8/31/2010 19:53:00 | 23.5 | 4/30/2011 19:37:01 | 25.126 |
| 8/31/2010 20:28:00 | 24.0 | 4/30/2011 20:13:01 | 25.126 |
| 8/31/2010 21:03:00 | 23.5 | 4/30/2011 20:49:01 | 25.126 |
| 8/31/2010 21:38:00 | 23.5 | 4/30/2011 21:25:01 | 25.126 |
| 8/31/2010 22:13:00 | 23.5 | 4/30/2011 22:01:01 | 25.126 |
| 8/31/2010 22:48:00 | 23.5 | 4/30/2011 22:37:01 | 25.126 |
| 8/31/2010 23:23:00 | 23.5 | 4/30/2011 23:13:01 | 25.126 |
| 8/31/2010 23:58:00 | 23.5 | 4/30/2011 23:49:01 | 25.126 |
| 9/1/2010 00:33:00  | 23.5 | 5/1/2011 00:25:01  | 25.126 |
| 9/1/2010 01:08:00  | 23.5 | 5/1/2011 01:01:01  | 25.126 |
| 9/1/2010 01:43:00  | 23.5 | 5/1/2011 01:37:01  | 25.625 |



|                   |      |                   |        |
|-------------------|------|-------------------|--------|
| 9/1/2010 02:18:00 | 23.5 | 5/1/2011 02:13:01 | 25.625 |
| 9/1/2010 02:53:00 | 23.5 | 5/1/2011 02:49:01 | 25.126 |
| 9/1/2010 03:28:00 | 23.5 | 5/1/2011 03:25:01 | 25.126 |
| 9/1/2010 04:03:00 | 23.5 | 5/1/2011 04:01:01 | 25.126 |
| 9/1/2010 04:38:00 | 23.5 | 5/1/2011 04:37:01 | 25.126 |
| 9/1/2010 05:13:00 | 23.5 | 5/1/2011 05:13:01 | 25.126 |
| 9/1/2010 05:48:00 | 23.5 | 5/1/2011 05:49:01 | 25.126 |
| 9/1/2010 06:23:00 | 23.5 | 5/1/2011 06:25:01 | 25.126 |
| 9/1/2010 06:58:00 | 23.5 | 5/1/2011 07:01:01 | 25.126 |
| 9/1/2010 07:33:00 | 23.5 | 5/1/2011 07:37:01 | 25.126 |
| 9/1/2010 08:08:00 | 23.5 | 5/1/2011 08:13:01 | 25.126 |
| 9/1/2010 08:43:00 | 23.5 | 5/1/2011 08:49:01 | 25.126 |
| 9/1/2010 09:18:00 | 23.5 | 5/1/2011 09:25:01 | 25.126 |
| 9/1/2010 09:53:00 | 23.5 | 5/1/2011 10:01:01 | 25.126 |
| 9/1/2010 10:28:00 | 23.5 | 5/1/2011 10:37:01 | 25.126 |
| 9/1/2010 11:03:00 | 23.5 | 5/1/2011 11:13:01 | 25.126 |
| 9/1/2010 11:38:00 | 23.5 | 5/1/2011 11:49:01 | 25.126 |
| 9/1/2010 12:13:00 | 23.5 | 5/1/2011 12:25:01 | 25.126 |
| 9/1/2010 12:48:00 | 23.5 | 5/1/2011 13:01:01 | 25.126 |
| 9/1/2010 13:23:00 | 23.5 | 5/1/2011 13:37:01 | 25.126 |
| 9/1/2010 13:58:00 | 23.5 | 5/1/2011 14:13:01 | 25.126 |
| 9/1/2010 14:33:00 | 23.5 | 5/1/2011 14:49:01 | 25.126 |
| 9/1/2010 15:08:00 | 23.5 | 5/1/2011 15:25:01 | 25.126 |
| 9/1/2010 15:43:00 | 23.5 | 5/1/2011 16:01:01 | 25.126 |
| 9/1/2010 16:18:00 | 23.5 | 5/1/2011 16:37:01 | 25.126 |
| 9/1/2010 16:53:00 | 23.5 | 5/1/2011 17:13:01 | 25.126 |
| 9/1/2010 17:28:00 | 23.5 | 5/1/2011 17:49:01 | 25.126 |
| 9/1/2010 18:03:00 | 23.5 | 5/1/2011 18:25:01 | 25.126 |
| 9/1/2010 18:38:00 | 24.0 | 5/1/2011 19:01:01 | 25.126 |
| 9/1/2010 19:13:00 | 24.0 | 5/1/2011 19:37:01 | 25.126 |
| 9/1/2010 19:48:00 | 24.0 | 5/1/2011 20:13:01 | 25.126 |
| 9/1/2010 20:23:00 | 24.0 | 5/1/2011 20:49:01 | 25.126 |
| 9/1/2010 20:58:00 | 24.0 | 5/1/2011 21:25:01 | 25.126 |
| 9/1/2010 21:33:00 | 24.0 | 5/1/2011 22:01:01 | 25.126 |
| 9/1/2010 22:08:00 | 24.0 | 5/1/2011 22:37:01 | 25.126 |
| 9/1/2010 22:43:00 | 24.0 | 5/1/2011 23:13:01 | 25.126 |
| 9/1/2010 23:18:00 | 24.0 | 5/1/2011 23:49:01 | 25.126 |
| 9/1/2010 23:53:00 | 24.0 | 5/2/2011 00:25:01 | 25.126 |
| 9/2/2010 00:28:00 | 24.0 | 5/2/2011 01:01:01 | 25.126 |
| 9/2/2010 01:03:00 | 24.0 | 5/2/2011 01:37:01 | 25.126 |
| 9/2/2010 01:38:00 | 24.0 | 5/2/2011 02:13:01 | 25.126 |
| 9/2/2010 02:13:00 | 24.0 | 5/2/2011 02:49:01 | 25.126 |
| 9/2/2010 02:48:00 | 24.0 | 5/2/2011 03:25:01 | 25.126 |
| 9/2/2010 03:23:00 | 24.0 | 5/2/2011 04:01:01 | 25.126 |
| 9/2/2010 03:58:00 | 24.0 | 5/2/2011 04:37:01 | 25.625 |
| 9/2/2010 04:33:00 | 24.0 | 5/2/2011 05:13:01 | 25.625 |
| 9/2/2010 05:08:00 | 24.0 | 5/2/2011 05:49:01 | 25.625 |
| 9/2/2010 05:43:00 | 24.0 | 5/2/2011 06:25:01 | 25.625 |
| 9/2/2010 06:18:00 | 24.0 | 5/2/2011 07:01:01 | 25.625 |
| 9/2/2010 06:53:00 | 23.5 | 5/2/2011 07:37:01 | 25.625 |

|                   |      |                   |        |
|-------------------|------|-------------------|--------|
| 9/2/2010 07:28:00 | 23.5 | 5/2/2011 08:13:01 | 25.625 |
| 9/2/2010 08:03:00 | 23.5 | 5/2/2011 08:49:01 | 25.625 |
| 9/2/2010 08:38:00 | 23.5 | 5/2/2011 09:25:01 | 25.625 |
| 9/2/2010 09:13:00 | 23.5 | 5/2/2011 10:01:01 | 25.625 |
| 9/2/2010 09:48:00 | 23.5 | 5/2/2011 10:37:01 | 25.625 |
| 9/2/2010 10:23:00 | 23.5 | 5/2/2011 11:13:01 | 25.625 |
| 9/2/2010 10:58:00 | 23.5 | 5/2/2011 11:49:01 | 25.126 |
| 9/2/2010 11:33:00 | 23.5 | 5/2/2011 12:25:01 | 25.126 |
| 9/2/2010 12:08:00 | 23.5 | 5/2/2011 13:01:01 | 25.126 |
| 9/2/2010 12:43:00 | 23.5 | 5/2/2011 13:37:01 | 25.126 |
| 9/2/2010 13:18:00 | 23.5 | 5/2/2011 14:13:01 | 25.126 |
| 9/2/2010 13:53:00 | 23.5 | 5/2/2011 14:49:01 | 25.126 |
| 9/2/2010 14:28:00 | 23.5 | 5/2/2011 15:25:01 | 25.126 |
| 9/2/2010 15:03:00 | 24.0 | 5/2/2011 16:01:01 | 25.126 |
| 9/2/2010 15:38:00 | 24.0 | 5/2/2011 16:37:01 | 25.126 |
| 9/2/2010 16:13:00 | 24.0 | 5/2/2011 17:13:01 | 25.126 |
| 9/2/2010 16:48:00 | 24.0 | 5/2/2011 17:49:01 | 25.126 |
| 9/2/2010 17:23:00 | 24.0 | 5/2/2011 18:25:01 | 25.126 |
| 9/2/2010 17:58:00 | 24.0 | 5/2/2011 19:01:01 | 25.625 |
| 9/2/2010 18:33:00 | 24.0 | 5/2/2011 19:37:01 | 25.625 |
| 9/2/2010 19:08:00 | 24.0 | 5/2/2011 20:13:01 | 25.625 |
| 9/2/2010 19:43:00 | 24.0 | 5/2/2011 20:49:01 | 25.625 |
| 9/2/2010 20:18:00 | 24.0 | 5/2/2011 21:25:01 | 25.625 |
| 9/2/2010 20:53:00 | 24.0 | 5/2/2011 22:01:01 | 25.625 |
| 9/2/2010 21:28:00 | 24.0 | 5/2/2011 22:37:01 | 25.625 |
| 9/2/2010 22:03:00 | 24.0 | 5/2/2011 23:13:01 | 25.625 |
| 9/2/2010 22:38:00 | 24.0 | 5/2/2011 23:49:01 | 25.126 |
| 9/2/2010 23:13:00 | 24.0 | 5/3/2011 00:25:01 | 25.625 |
| 9/2/2010 23:48:00 | 24.0 | 5/3/2011 01:01:01 | 25.625 |
| 9/3/2010 00:23:00 | 24.0 | 5/3/2011 01:37:01 | 25.625 |
| 9/3/2010 00:58:00 | 24.0 | 5/3/2011 02:13:01 | 25.625 |
| 9/3/2010 01:33:00 | 24.0 | 5/3/2011 02:49:01 | 25.625 |
| 9/3/2010 02:08:00 | 24.0 | 5/3/2011 03:25:01 | 25.625 |
| 9/3/2010 02:43:00 | 24.0 | 5/3/2011 04:01:01 | 25.126 |
| 9/3/2010 03:18:00 | 24.0 | 5/3/2011 04:37:01 | 25.126 |
| 9/3/2010 03:53:00 | 24.0 | 5/3/2011 05:13:01 | 25.126 |
| 9/3/2010 04:28:00 | 24.0 | 5/3/2011 05:49:01 | 25.126 |
| 9/3/2010 05:03:00 | 24.0 | 5/3/2011 06:25:01 | 25.126 |
| 9/3/2010 05:38:00 | 24.0 | 5/3/2011 07:01:01 | 25.126 |
| 9/3/2010 06:13:00 | 23.5 | 5/3/2011 07:37:01 | 25.126 |
| 9/3/2010 06:48:00 | 23.5 | 5/3/2011 08:13:01 | 25.126 |
| 9/3/2010 07:23:00 | 23.5 | 5/3/2011 08:49:01 | 25.126 |
| 9/3/2010 07:58:00 | 23.5 | 5/3/2011 09:25:01 | 25.126 |
| 9/3/2010 08:33:00 | 23.5 | 5/3/2011 10:01:01 | 25.126 |
| 9/3/2010 09:08:00 | 23.5 | 5/3/2011 10:37:01 | 25.126 |
| 9/3/2010 09:43:00 | 23.5 | 5/3/2011 11:13:01 | 25.126 |
| 9/3/2010 10:18:00 | 23.5 | 5/3/2011 11:49:01 | 25.126 |
| 9/3/2010 10:53:00 | 23.5 | 5/3/2011 12:25:01 | 25.126 |
| 9/3/2010 11:28:00 | 23.5 | 5/3/2011 13:01:01 | 25.126 |
| 9/3/2010 12:03:00 | 23.5 | 5/3/2011 13:37:01 | 25.126 |

|                   |      |                   |        |
|-------------------|------|-------------------|--------|
| 9/3/2010 12:38:00 | 23.5 | 5/3/2011 14:13:01 | 25.126 |
| 9/3/2010 13:13:00 | 23.5 | 5/3/2011 14:49:01 | 25.126 |
| 9/3/2010 13:48:00 | 23.5 | 5/3/2011 15:25:01 | 25.126 |
| 9/3/2010 14:23:00 | 23.5 | 5/3/2011 16:01:01 | 25.126 |
| 9/3/2010 14:58:00 | 23.5 | 5/3/2011 16:37:01 | 25.126 |
| 9/3/2010 15:33:00 | 23.5 | 5/3/2011 17:13:01 | 25.126 |
| 9/3/2010 16:08:00 | 23.5 | 5/3/2011 17:49:01 | 25.126 |
| 9/3/2010 16:43:00 | 23.5 | 5/3/2011 18:25:01 | 25.126 |
| 9/3/2010 17:18:00 | 23.5 | 5/3/2011 19:01:01 | 25.126 |
| 9/3/2010 17:53:00 | 23.5 | 5/3/2011 19:37:01 | 25.126 |
| 9/3/2010 18:28:00 | 24.0 | 5/3/2011 20:13:01 | 25.126 |
| 9/3/2010 19:03:00 | 24.0 | 5/3/2011 20:49:01 | 25.126 |
| 9/3/2010 19:38:00 | 24.0 | 5/3/2011 21:25:01 | 25.126 |
| 9/3/2010 20:13:00 | 24.0 | 5/3/2011 22:01:01 | 25.126 |
| 9/3/2010 20:48:00 | 24.0 | 5/3/2011 22:37:01 | 25.126 |
| 9/3/2010 21:23:00 | 24.0 | 5/3/2011 23:13:01 | 25.126 |
| 9/3/2010 21:58:00 | 24.0 | 5/3/2011 23:49:01 | 25.625 |
| 9/3/2010 22:33:00 | 24.0 | 5/4/2011 00:25:01 | 25.625 |
| 9/3/2010 23:08:00 | 24.0 | 5/4/2011 01:01:01 | 25.625 |
| 9/3/2010 23:43:00 | 24.0 | 5/4/2011 01:37:01 | 25.625 |
| 9/4/2010 00:18:00 | 24.0 | 5/4/2011 02:13:01 | 25.625 |
| 9/4/2010 00:53:00 | 24.0 | 5/4/2011 02:49:01 | 25.126 |
| 9/4/2010 01:28:00 | 24.0 | 5/4/2011 03:25:01 | 25.126 |
| 9/4/2010 02:03:00 | 24.0 | 5/4/2011 04:01:01 | 25.126 |
| 9/4/2010 02:38:00 | 23.5 | 5/4/2011 04:37:01 | 25.126 |
| 9/4/2010 03:13:00 | 23.5 | 5/4/2011 05:13:01 | 25.126 |
| 9/4/2010 03:48:00 | 23.5 | 5/4/2011 05:49:01 | 25.126 |
| 9/4/2010 04:23:00 | 23.5 | 5/4/2011 06:25:01 | 25.126 |
| 9/4/2010 04:58:00 | 23.5 | 5/4/2011 07:01:01 | 25.126 |
| 9/4/2010 05:33:00 | 23.5 | 5/4/2011 07:37:01 | 25.126 |
| 9/4/2010 06:08:00 | 23.5 | 5/4/2011 08:13:01 | 25.126 |
| 9/4/2010 06:43:00 | 23.5 | 5/4/2011 08:49:01 | 25.126 |
| 9/4/2010 07:18:00 | 23.5 | 5/4/2011 09:25:01 | 25.126 |
| 9/4/2010 07:53:00 | 23.5 | 5/4/2011 10:01:01 | 25.126 |
| 9/4/2010 08:28:00 | 23.5 | 5/4/2011 10:37:01 | 25.126 |
| 9/4/2010 09:03:00 | 23.5 | 5/4/2011 11:13:01 | 25.126 |
| 9/4/2010 09:38:00 | 23.5 | 5/4/2011 11:49:01 | 25.126 |
| 9/4/2010 10:13:00 | 23.5 | 5/4/2011 12:25:01 | 25.126 |
| 9/4/2010 10:48:00 | 23.5 | 5/4/2011 13:01:01 | 25.126 |
| 9/4/2010 11:23:00 | 23.5 | 5/4/2011 13:37:01 | 25.126 |
| 9/4/2010 11:58:00 | 23.5 | 5/4/2011 14:13:01 | 25.126 |
| 9/4/2010 12:33:00 | 23.5 | 5/4/2011 14:49:01 | 25.126 |
| 9/4/2010 13:08:00 | 23.5 | 5/4/2011 15:25:01 | 25.126 |
| 9/4/2010 13:43:00 | 23.5 | 5/4/2011 16:01:01 | 25.126 |
| 9/4/2010 14:18:00 | 23.5 | 5/4/2011 16:37:01 | 25.126 |
| 9/4/2010 14:53:00 | 23.5 | 5/4/2011 17:13:01 | 25.126 |
| 9/4/2010 15:28:00 | 23.5 | 5/4/2011 17:49:01 | 25.126 |
| 9/4/2010 16:03:00 | 23.5 | 5/4/2011 18:25:01 | 25.126 |
| 9/4/2010 16:38:00 | 23.5 | 5/4/2011 19:01:01 | 25.126 |
| 9/4/2010 17:13:00 | 24.0 | 5/4/2011 19:37:01 | 25.126 |

|                   |      |                   |        |
|-------------------|------|-------------------|--------|
| 9/4/2010 17:48:00 | 24.0 | 5/4/2011 20:13:01 | 25.126 |
| 9/4/2010 18:23:00 | 24.0 | 5/4/2011 20:49:01 | 25.126 |
| 9/4/2010 18:58:00 | 24.0 | 5/4/2011 21:25:01 | 25.126 |
| 9/4/2010 19:33:00 | 24.0 | 5/4/2011 22:01:01 | 25.126 |
| 9/4/2010 20:08:00 | 24.0 | 5/4/2011 22:37:01 | 25.126 |
| 9/4/2010 20:43:00 | 24.0 | 5/4/2011 23:13:01 | 25.126 |
| 9/4/2010 21:18:00 | 24.0 | 5/4/2011 23:49:01 | 25.126 |
| 9/4/2010 21:53:00 | 24.0 | 5/5/2011 00:25:01 | 25.126 |
| 9/4/2010 22:28:00 | 24.0 | 5/5/2011 01:01:01 | 25.126 |
| 9/4/2010 23:03:00 | 24.0 | 5/5/2011 01:37:01 | 25.126 |
| 9/4/2010 23:38:00 | 24.0 | 5/5/2011 02:13:01 | 25.126 |
| 9/5/2010 00:13:00 | 24.0 | 5/5/2011 02:49:01 | 25.126 |
| 9/5/2010 00:48:00 | 24.0 | 5/5/2011 03:25:01 | 25.126 |
| 9/5/2010 01:23:00 | 24.0 | 5/5/2011 04:01:01 | 25.126 |
| 9/5/2010 01:58:00 | 24.0 | 5/5/2011 04:37:01 | 25.126 |
| 9/5/2010 02:33:00 | 24.0 | 5/5/2011 05:13:01 | 25.126 |
| 9/5/2010 03:08:00 | 24.0 | 5/5/2011 05:49:01 | 25.126 |
| 9/5/2010 03:43:00 | 24.0 | 5/5/2011 06:25:01 | 25.126 |
| 9/5/2010 04:18:00 | 24.0 | 5/5/2011 07:01:01 | 25.126 |
| 9/5/2010 04:53:00 | 24.0 | 5/5/2011 07:37:01 | 25.126 |
| 9/5/2010 05:28:00 | 24.0 | 5/5/2011 08:13:01 | 25.126 |
| 9/5/2010 06:03:00 | 24.0 | 5/5/2011 08:49:01 | 25.126 |
| 9/5/2010 06:38:00 | 24.0 | 5/5/2011 09:25:01 | 25.126 |
| 9/5/2010 07:13:00 | 24.0 | 5/5/2011 10:01:01 | 25.126 |
| 9/5/2010 07:48:00 | 24.0 | 5/5/2011 10:37:01 | 25.126 |
| 9/5/2010 08:23:00 | 24.0 | 5/5/2011 11:13:01 | 25.126 |
| 9/5/2010 08:58:00 | 24.0 | 5/5/2011 11:49:01 | 25.126 |
| 9/5/2010 09:33:00 | 24.0 | 5/5/2011 12:25:01 | 25.126 |
| 9/5/2010 10:08:00 | 24.0 | 5/5/2011 13:01:01 | 25.126 |
| 9/5/2010 10:43:00 | 24.0 | 5/5/2011 13:37:01 | 25.126 |
| 9/5/2010 11:18:00 | 24.0 | 5/5/2011 14:13:01 | 25.126 |
| 9/5/2010 11:53:00 | 24.0 | 5/5/2011 14:49:01 | 25.126 |
| 9/5/2010 12:28:00 | 24.0 | 5/5/2011 15:25:01 | 25.126 |
| 9/5/2010 13:03:00 | 24.0 | 5/5/2011 16:01:01 | 25.126 |
| 9/5/2010 13:38:00 | 24.0 | 5/5/2011 16:37:01 | 25.126 |
| 9/5/2010 14:13:00 | 24.0 | 5/5/2011 17:13:01 | 24.626 |
| 9/5/2010 14:48:00 | 24.0 | 5/5/2011 17:49:01 | 25.126 |
| 9/5/2010 15:23:00 | 24.0 | 5/5/2011 18:25:01 | 25.126 |
| 9/5/2010 15:58:00 | 24.0 | 5/5/2011 19:01:01 | 25.126 |
| 9/5/2010 16:33:00 | 24.0 | 5/5/2011 19:37:01 | 25.126 |
| 9/5/2010 17:08:00 | 24.0 | 5/5/2011 20:13:01 | 25.126 |
| 9/5/2010 17:43:00 | 24.0 | 5/5/2011 20:49:01 | 25.126 |
| 9/5/2010 18:18:00 | 24.0 | 5/5/2011 21:25:01 | 25.126 |
| 9/5/2010 18:53:00 | 24.0 | 5/5/2011 22:01:01 | 25.126 |
| 9/5/2010 19:28:00 | 24.0 | 5/5/2011 22:37:01 | 25.126 |
| 9/5/2010 20:03:00 | 24.0 | 5/5/2011 23:13:01 | 25.126 |
| 9/5/2010 20:38:00 | 24.0 | 5/5/2011 23:49:01 | 25.126 |
| 9/5/2010 21:13:00 | 24.0 | 5/6/2011 00:25:01 | 25.126 |
| 9/5/2010 21:48:00 | 24.0 | 5/6/2011 01:01:01 | 25.126 |
| 9/5/2010 22:23:00 | 24.0 | 5/6/2011 01:37:01 | 25.126 |

|                   |      |                   |        |
|-------------------|------|-------------------|--------|
| 9/5/2010 22:58:00 | 24.0 | 5/6/2011 02:13:01 | 25.126 |
| 9/5/2010 23:33:00 | 24.0 | 5/6/2011 02:49:01 | 25.126 |
| 9/6/2010 00:08:00 | 24.0 | 5/6/2011 03:25:01 | 25.126 |
| 9/6/2010 00:43:00 | 24.0 | 5/6/2011 04:01:01 | 24.626 |
| 9/6/2010 01:18:00 | 24.0 | 5/6/2011 04:37:01 | 25.126 |
| 9/6/2010 01:53:00 | 24.0 | 5/6/2011 05:13:01 | 25.126 |
| 9/6/2010 02:28:00 | 24.0 | 5/6/2011 05:49:01 | 25.126 |
| 9/6/2010 03:03:00 | 24.0 | 5/6/2011 06:25:01 | 25.126 |
| 9/6/2010 03:38:00 | 24.0 | 5/6/2011 07:01:01 | 25.126 |
| 9/6/2010 04:13:00 | 24.0 | 5/6/2011 07:37:01 | 25.126 |
| 9/6/2010 04:48:00 | 24.0 | 5/6/2011 08:13:01 | 25.126 |
| 9/6/2010 05:23:00 | 24.0 | 5/6/2011 08:49:01 | 25.126 |
| 9/6/2010 05:58:00 | 24.0 | 5/6/2011 09:25:01 | 25.126 |
| 9/6/2010 06:33:00 | 24.0 | 5/6/2011 10:01:01 | 25.126 |
| 9/6/2010 07:08:00 | 24.0 | 5/6/2011 10:37:01 | 25.126 |
| 9/6/2010 07:43:00 | 24.0 | 5/6/2011 11:13:01 | 24.626 |
| 9/6/2010 08:18:00 | 24.0 | 5/6/2011 11:49:01 | 24.626 |
| 9/6/2010 08:53:00 | 24.0 | 5/6/2011 12:25:01 | 24.626 |
| 9/6/2010 09:28:00 | 24.0 | 5/6/2011 13:01:01 | 24.626 |
| 9/6/2010 10:03:00 | 24.0 | 5/6/2011 13:37:01 | 24.626 |
| 9/6/2010 10:38:00 | 24.0 | 5/6/2011 14:13:01 | 24.626 |
| 9/6/2010 11:13:00 | 24.0 | 5/6/2011 14:49:01 | 24.626 |
| 9/6/2010 11:48:00 | 24.0 | 5/6/2011 15:25:01 | 24.626 |
| 9/6/2010 12:23:00 | 24.0 | 5/6/2011 16:01:01 | 24.626 |
| 9/6/2010 12:58:00 | 24.0 | 5/6/2011 16:37:01 | 25.126 |
| 9/6/2010 13:33:00 | 24.0 | 5/6/2011 17:13:01 | 25.126 |
| 9/6/2010 14:08:00 | 24.0 | 5/6/2011 17:49:01 | 25.126 |
| 9/6/2010 14:43:00 | 24.0 | 5/6/2011 18:25:01 | 25.126 |
| 9/6/2010 15:18:00 | 24.0 | 5/6/2011 19:01:01 | 25.126 |
| 9/6/2010 15:53:00 | 24.0 | 5/6/2011 19:37:01 | 25.126 |
| 9/6/2010 16:28:00 | 24.5 | 5/6/2011 20:13:01 | 25.126 |
| 9/6/2010 17:03:00 | 24.5 | 5/6/2011 20:49:01 | 25.126 |
| 9/6/2010 17:38:00 | 24.5 | 5/6/2011 21:25:01 | 25.126 |
| 9/6/2010 18:13:00 | 24.5 | 5/6/2011 22:01:01 | 25.126 |
| 9/6/2010 18:48:00 | 24.5 | 5/6/2011 22:37:01 | 25.126 |
| 9/6/2010 19:23:00 | 24.5 | 5/6/2011 23:13:01 | 25.126 |
| 9/6/2010 19:58:00 | 24.5 | 5/6/2011 23:49:01 | 25.126 |
| 9/6/2010 20:33:00 | 24.5 | 5/7/2011 00:25:01 | 25.126 |
| 9/6/2010 21:08:00 | 24.5 | 5/7/2011 01:01:01 | 25.126 |
| 9/6/2010 21:43:00 | 24.5 | 5/7/2011 01:37:01 | 25.126 |
| 9/6/2010 22:18:00 | 24.5 | 5/7/2011 02:13:01 | 25.126 |
| 9/6/2010 22:53:00 | 24.5 | 5/7/2011 02:49:01 | 25.126 |
| 9/6/2010 23:28:00 | 24.5 | 5/7/2011 03:25:01 | 25.126 |
| 9/7/2010 00:03:00 | 24.5 | 5/7/2011 04:01:01 | 25.126 |
| 9/7/2010 00:38:00 | 24.5 | 5/7/2011 04:37:01 | 25.126 |
| 9/7/2010 01:13:00 | 24.5 | 5/7/2011 05:13:01 | 25.126 |
| 9/7/2010 01:48:00 | 24.0 | 5/7/2011 05:49:01 | 25.126 |
| 9/7/2010 02:23:00 | 24.0 | 5/7/2011 06:25:01 | 25.126 |
| 9/7/2010 02:58:00 | 24.0 | 5/7/2011 07:01:01 | 25.126 |
| 9/7/2010 03:33:00 | 24.0 | 5/7/2011 07:37:01 | 25.126 |

|                   |      |                   |        |
|-------------------|------|-------------------|--------|
| 9/7/2010 04:08:00 | 24.0 | 5/7/2011 08:13:01 | 25.126 |
| 9/7/2010 04:43:00 | 24.0 | 5/7/2011 08:49:01 | 25.126 |
| 9/7/2010 05:18:00 | 24.0 | 5/7/2011 09:25:01 | 25.126 |
| 9/7/2010 05:53:00 | 24.0 | 5/7/2011 10:01:01 | 25.126 |
| 9/7/2010 06:28:00 | 24.0 | 5/7/2011 10:37:01 | 25.126 |
| 9/7/2010 07:03:00 | 24.0 | 5/7/2011 11:13:01 | 24.626 |
| 9/7/2010 07:38:00 | 24.0 | 5/7/2011 11:49:01 | 24.626 |
| 9/7/2010 08:13:00 | 24.0 | 5/7/2011 12:25:01 | 24.626 |
| 9/7/2010 08:48:00 | 24.0 | 5/7/2011 13:01:01 | 24.626 |
| 9/7/2010 09:23:00 | 24.0 | 5/7/2011 13:37:01 | 24.626 |
| 9/7/2010 09:58:00 | 24.0 | 5/7/2011 14:13:01 | 24.626 |
| 9/7/2010 10:33:00 | 24.0 | 5/7/2011 14:49:01 | 24.626 |
| 9/7/2010 11:08:00 | 24.0 | 5/7/2011 15:25:01 | 24.626 |
| 9/7/2010 11:43:00 | 24.0 | 5/7/2011 16:01:01 | 25.126 |
| 9/7/2010 12:18:00 | 24.0 | 5/7/2011 16:37:01 | 25.126 |
| 9/7/2010 12:53:00 | 24.0 | 5/7/2011 17:13:01 | 25.126 |
| 9/7/2010 13:28:00 | 24.0 | 5/7/2011 17:49:01 | 25.126 |
| 9/7/2010 14:03:00 | 24.0 | 5/7/2011 18:25:01 | 25.126 |
| 9/7/2010 14:38:00 | 24.0 | 5/7/2011 19:01:01 | 25.126 |
| 9/7/2010 15:13:00 | 24.0 | 5/7/2011 19:37:01 | 25.126 |
| 9/7/2010 15:48:00 | 24.0 | 5/7/2011 20:13:01 | 25.126 |
| 9/7/2010 16:23:00 | 24.0 | 5/7/2011 20:49:01 | 25.126 |
| 9/7/2010 16:58:00 | 24.0 | 5/7/2011 21:25:01 | 25.126 |
| 9/7/2010 17:33:00 | 24.0 | 5/7/2011 22:01:01 | 25.126 |
| 9/7/2010 18:08:00 | 24.0 | 5/7/2011 22:37:01 | 25.126 |
| 9/7/2010 18:43:00 | 24.0 | 5/7/2011 23:13:01 | 25.126 |
| 9/7/2010 19:18:00 | 24.0 | 5/7/2011 23:49:01 | 25.126 |
| 9/7/2010 19:53:00 | 24.0 | 5/8/2011 00:25:01 | 25.126 |
| 9/7/2010 20:28:00 | 24.0 | 5/8/2011 01:01:01 | 25.126 |
| 9/7/2010 21:03:00 | 24.0 | 5/8/2011 01:37:01 | 25.126 |
| 9/7/2010 21:38:00 | 24.0 | 5/8/2011 02:13:01 | 25.126 |
| 9/7/2010 22:13:00 | 24.0 | 5/8/2011 02:49:01 | 25.126 |
| 9/7/2010 22:48:00 | 24.0 | 5/8/2011 03:25:01 | 25.126 |
| 9/7/2010 23:23:00 | 24.0 | 5/8/2011 04:01:01 | 25.126 |
| 9/7/2010 23:58:00 | 24.0 | 5/8/2011 04:37:01 | 25.126 |
| 9/8/2010 00:33:00 | 24.0 | 5/8/2011 05:13:01 | 25.126 |
| 9/8/2010 01:08:00 | 24.0 | 5/8/2011 05:49:01 | 24.626 |
| 9/8/2010 01:43:00 | 24.0 | 5/8/2011 06:25:01 | 25.126 |
| 9/8/2010 02:18:00 | 24.0 | 5/8/2011 07:01:01 | 24.626 |
| 9/8/2010 02:53:00 | 24.0 | 5/8/2011 07:37:01 | 25.126 |
| 9/8/2010 03:28:00 | 24.0 | 5/8/2011 08:13:01 | 25.126 |
| 9/8/2010 04:03:00 | 24.0 | 5/8/2011 08:49:01 | 25.126 |
| 9/8/2010 04:38:00 | 24.0 | 5/8/2011 09:25:01 | 25.126 |
| 9/8/2010 05:13:00 | 24.0 | 5/8/2011 10:01:01 | 24.626 |
| 9/8/2010 05:48:00 | 24.0 | 5/8/2011 10:37:01 | 24.626 |
| 9/8/2010 06:23:00 | 23.5 | 5/8/2011 11:13:01 | 24.626 |
| 9/8/2010 06:58:00 | 23.5 | 5/8/2011 11:49:01 | 25.126 |
| 9/8/2010 07:33:00 | 23.5 | 5/8/2011 12:25:01 | 25.126 |
| 9/8/2010 08:08:00 | 23.5 | 5/8/2011 13:01:01 | 25.126 |
| 9/8/2010 08:43:00 | 23.5 | 5/8/2011 13:37:01 | 25.126 |

|                   |      |                   |        |
|-------------------|------|-------------------|--------|
| 9/8/2010 09:18:00 | 23.5 | 5/8/2011 14:13:01 | 25.126 |
| 9/8/2010 09:53:00 | 23.5 | 5/8/2011 14:49:01 | 25.126 |
| 9/8/2010 10:28:00 | 23.5 | 5/8/2011 15:25:01 | 25.126 |
| 9/8/2010 11:03:00 | 23.5 | 5/8/2011 16:01:01 | 25.126 |
| 9/8/2010 11:38:00 | 23.5 | 5/8/2011 16:37:01 | 25.126 |
| 9/8/2010 12:13:00 | 23.5 | 5/8/2011 17:13:01 | 25.126 |
| 9/8/2010 12:48:00 | 23.5 | 5/8/2011 17:49:01 | 25.126 |
| 9/8/2010 13:23:00 | 23.5 | 5/8/2011 18:25:01 | 25.126 |
| 9/8/2010 13:58:00 | 23.5 | 5/8/2011 19:01:01 | 25.126 |
| 9/8/2010 14:33:00 | 23.5 | 5/8/2011 19:37:01 | 25.126 |
| 9/8/2010 15:08:00 | 23.5 | 5/8/2011 20:13:01 | 25.126 |
| 9/8/2010 15:43:00 | 23.5 | 5/8/2011 20:49:01 | 25.126 |
| 9/8/2010 16:18:00 | 23.5 | 5/8/2011 21:25:01 | 25.126 |
| 9/8/2010 16:53:00 | 23.5 | 5/8/2011 22:01:01 | 25.126 |
| 9/8/2010 17:28:00 | 23.5 | 5/8/2011 22:37:01 | 25.126 |
| 9/8/2010 18:03:00 | 24.0 | 5/8/2011 23:13:01 | 25.126 |
| 9/8/2010 18:38:00 | 24.0 | 5/8/2011 23:49:01 | 25.126 |
| 9/8/2010 19:13:00 | 24.0 | 5/9/2011 00:25:01 | 25.126 |
| 9/8/2010 19:48:00 | 24.0 | 5/9/2011 01:01:01 | 25.126 |
| 9/8/2010 20:23:00 | 24.0 | 5/9/2011 01:37:01 | 25.126 |
| 9/8/2010 20:58:00 | 24.0 | 5/9/2011 02:13:01 | 25.126 |
| 9/8/2010 21:33:00 | 24.0 | 5/9/2011 02:49:01 | 24.626 |
| 9/8/2010 22:08:00 | 24.0 | 5/9/2011 03:25:01 | 24.626 |
| 9/8/2010 22:43:00 | 24.0 | 5/9/2011 04:01:01 | 24.626 |
| 9/8/2010 23:18:00 | 24.0 | 5/9/2011 04:37:01 | 24.626 |
| 9/8/2010 23:53:00 | 24.0 | 5/9/2011 05:13:01 | 24.626 |
| 9/9/2010 00:28:00 | 24.0 | 5/9/2011 05:49:01 | 24.626 |
| 9/9/2010 01:03:00 | 24.0 | 5/9/2011 06:25:01 | 24.626 |
| 9/9/2010 01:38:00 | 24.0 | 5/9/2011 07:01:01 | 24.626 |
| 9/9/2010 02:13:00 | 24.0 | 5/9/2011 07:37:01 | 24.626 |
| 9/9/2010 02:48:00 | 24.0 | 5/9/2011 08:13:01 | 24.626 |
| 9/9/2010 03:23:00 | 23.5 | 5/9/2011 08:49:01 | 24.626 |
| 9/9/2010 03:58:00 | 23.5 | 5/9/2011 09:25:01 | 24.626 |
| 9/9/2010 04:33:00 | 23.5 | 5/9/2011 10:01:01 | 24.626 |
| 9/9/2010 05:08:00 | 23.5 | 5/9/2011 10:37:01 | 24.626 |
| 9/9/2010 05:43:00 | 23.5 | 5/9/2011 11:13:01 | 24.626 |
| 9/9/2010 06:18:00 | 23.5 | 5/9/2011 11:49:01 | 24.626 |
| 9/9/2010 06:53:00 | 23.5 | 5/9/2011 12:25:01 | 24.626 |
| 9/9/2010 07:28:00 | 23.5 | 5/9/2011 13:01:01 | 24.626 |
| 9/9/2010 08:03:00 | 23.5 | 5/9/2011 13:37:01 | 24.626 |
| 9/9/2010 08:38:00 | 23.5 | 5/9/2011 14:13:01 | 24.626 |
| 9/9/2010 09:13:00 | 23.5 | 5/9/2011 14:49:01 | 24.626 |
| 9/9/2010 09:48:00 | 23.5 | 5/9/2011 15:25:01 | 24.626 |
| 9/9/2010 10:23:00 | 23.5 | 5/9/2011 16:01:01 | 24.626 |
| 9/9/2010 10:58:00 | 23.5 | 5/9/2011 16:37:01 | 24.626 |
| 9/9/2010 11:33:00 | 23.5 | 5/9/2011 17:13:01 | 24.626 |
| 9/9/2010 12:08:00 | 23.5 | 5/9/2011 17:49:01 | 24.626 |
| 9/9/2010 12:43:00 | 23.5 | 5/9/2011 18:25:01 | 24.626 |
| 9/9/2010 13:18:00 | 23.5 | 5/9/2011 19:01:01 | 24.626 |
| 9/9/2010 13:53:00 | 23.5 | 5/9/2011 19:37:01 | 24.626 |

|                    |      |                    |        |
|--------------------|------|--------------------|--------|
| 9/9/2010 14:28:00  | 23.5 | 5/9/2011 20:13:01  | 24.626 |
| 9/9/2010 15:03:00  | 23.5 | 5/9/2011 20:49:01  | 24.626 |
| 9/9/2010 15:38:00  | 23.5 | 5/9/2011 21:25:01  | 24.626 |
| 9/9/2010 16:13:00  | 23.5 | 5/9/2011 22:01:01  | 24.626 |
| 9/9/2010 16:48:00  | 23.5 | 5/9/2011 22:37:01  | 24.626 |
| 9/9/2010 17:23:00  | 23.5 | 5/9/2011 23:13:01  | 24.626 |
| 9/9/2010 17:58:00  | 23.5 | 5/9/2011 23:49:01  | 24.626 |
| 9/9/2010 18:33:00  | 23.5 | 5/10/2011 00:25:01 | 24.626 |
| 9/9/2010 18:53:00  | 24.0 | 5/10/2011 01:01:01 | 24.626 |
| 9/9/2010 19:28:00  | 24.0 | 5/10/2011 01:37:01 | 24.626 |
| 9/9/2010 20:03:00  | 24.0 | 5/10/2011 02:13:01 | 24.626 |
| 9/9/2010 20:38:00  | 24.0 | 5/10/2011 02:49:01 | 24.626 |
| 9/9/2010 21:13:00  | 24.0 | 5/10/2011 03:25:01 | 24.626 |
| 9/9/2010 21:48:00  | 24.0 | 5/10/2011 04:01:01 | 24.626 |
| 9/9/2010 22:23:00  | 24.0 | 5/10/2011 04:37:01 | 24.626 |
| 9/9/2010 22:58:00  | 24.0 | 5/10/2011 05:13:01 | 24.626 |
| 9/9/2010 23:33:00  | 24.0 | 5/10/2011 05:49:01 | 24.626 |
| 9/10/2010 00:08:00 | 24.0 | 5/10/2011 06:25:01 | 24.626 |
| 9/10/2010 00:43:00 | 24.0 | 5/10/2011 07:01:01 | 24.626 |
| 9/10/2010 01:18:00 | 24.0 | 5/10/2011 07:37:01 | 24.626 |
| 9/10/2010 01:53:00 | 24.0 | 5/10/2011 08:13:01 | 24.626 |
| 9/10/2010 02:28:00 | 23.5 | 5/10/2011 08:49:01 | 24.626 |
| 9/10/2010 03:03:00 | 23.5 | 5/10/2011 09:25:01 | 24.626 |
| 9/10/2010 03:38:00 | 23.5 | 5/10/2011 10:01:01 | 24.626 |
| 9/10/2010 04:13:00 | 23.5 | 5/10/2011 10:37:01 | 24.626 |
| 9/10/2010 04:48:00 | 23.5 | 5/10/2011 11:13:01 | 24.126 |
| 9/10/2010 05:23:00 | 23.5 | 5/10/2011 11:49:01 | 24.126 |
| 9/10/2010 05:58:00 | 23.5 | 5/10/2011 12:25:01 | 24.626 |
| 9/10/2010 06:33:00 | 23.5 | 5/10/2011 13:01:01 | 24.626 |
| 9/10/2010 07:08:00 | 23.5 | 5/10/2011 13:37:01 | 24.626 |
| 9/10/2010 07:43:00 | 23.5 | 5/10/2011 14:13:01 | 24.626 |
| 9/10/2010 08:18:00 | 23.5 | 5/10/2011 14:49:01 | 24.626 |
| 9/10/2010 08:53:00 | 23.5 | 5/10/2011 15:25:01 | 24.626 |
| 9/10/2010 09:28:00 | 23.5 | 5/10/2011 16:01:01 | 24.626 |
| 9/10/2010 10:03:00 | 23.5 | 5/10/2011 16:37:01 | 24.626 |
| 9/10/2010 10:38:00 | 23.5 | 5/10/2011 17:13:01 | 24.626 |
| 9/10/2010 11:13:00 | 23.5 | 5/10/2011 17:49:01 | 24.626 |
| 9/10/2010 11:48:00 | 23.5 | 5/10/2011 18:25:01 | 24.626 |
| 9/10/2010 12:23:00 | 23.5 | 5/10/2011 19:01:01 | 24.626 |
| 9/10/2010 12:58:00 | 23.5 | 5/10/2011 19:37:01 | 24.626 |
| 9/10/2010 13:33:00 | 23.5 | 5/10/2011 20:13:01 | 24.626 |
| 9/10/2010 14:08:00 | 23.5 | 5/10/2011 20:49:01 | 24.626 |
| 9/10/2010 14:43:00 | 23.5 | 5/10/2011 21:25:01 | 24.626 |
| 9/10/2010 15:18:00 | 23.5 | 5/10/2011 22:01:01 | 24.626 |
| 9/10/2010 15:53:00 | 23.5 | 5/10/2011 22:37:01 | 24.626 |
| 9/10/2010 16:28:00 | 23.5 | 5/10/2011 23:13:01 | 24.626 |
| 9/10/2010 17:03:00 | 23.5 | 5/10/2011 23:49:01 | 24.626 |
| 9/10/2010 17:38:00 | 23.5 | 5/11/2011 00:25:01 | 24.626 |
| 9/10/2010 18:13:00 | 24.0 | 5/11/2011 01:01:01 | 24.626 |
| 9/10/2010 18:48:00 | 24.0 | 5/11/2011 01:37:01 | 25.126 |



|                    |      |                    |        |
|--------------------|------|--------------------|--------|
| 9/10/2010 19:23:00 | 24.0 | 5/11/2011 02:13:01 | 24.626 |
| 9/10/2010 19:58:00 | 24.0 | 5/11/2011 02:49:01 | 24.626 |
| 9/10/2010 20:33:00 | 24.0 | 5/11/2011 03:25:01 | 24.626 |
| 9/10/2010 21:08:00 | 24.0 | 5/11/2011 04:01:01 | 24.626 |
| 9/10/2010 21:43:00 | 24.0 | 5/11/2011 04:37:01 | 24.626 |
| 9/10/2010 22:18:00 | 24.0 | 5/11/2011 05:13:01 | 24.626 |
| 9/10/2010 22:53:00 | 24.0 | 5/11/2011 05:49:01 | 24.626 |
| 9/10/2010 23:28:00 | 24.0 | 5/11/2011 06:25:01 | 24.626 |
| 9/11/2010 00:03:00 | 24.0 | 5/11/2011 07:01:01 | 24.626 |
| 9/11/2010 00:38:00 | 24.0 | 5/11/2011 07:37:01 | 24.626 |
| 9/11/2010 01:13:00 | 24.0 | 5/11/2011 08:13:01 | 24.626 |
| 9/11/2010 01:48:00 | 24.0 | 5/11/2011 08:49:01 | 24.626 |
| 9/11/2010 02:23:00 | 24.0 | 5/11/2011 09:25:01 | 24.626 |
| 9/11/2010 02:58:00 | 24.0 | 5/11/2011 10:01:01 | 24.626 |
| 9/11/2010 03:33:00 | 24.0 | 5/11/2011 10:37:01 | 24.626 |
| 9/11/2010 04:08:00 | 24.0 | 5/11/2011 11:13:01 | 24.626 |
| 9/11/2010 04:43:00 | 24.0 | 5/11/2011 11:49:01 | 24.126 |
| 9/11/2010 05:18:00 | 24.0 | 5/11/2011 12:25:01 | 24.126 |
| 9/11/2010 05:53:00 | 24.0 | 5/11/2011 13:01:01 | 24.126 |
| 9/11/2010 06:28:00 | 24.0 | 5/11/2011 13:37:01 | 24.126 |
| 9/11/2010 07:03:00 | 24.0 | 5/11/2011 14:13:01 | 24.126 |
| 9/11/2010 07:38:00 | 23.5 | 5/11/2011 14:49:01 | 24.126 |
| 9/11/2010 08:13:00 | 23.5 | 5/11/2011 15:25:01 | 24.626 |
| 9/11/2010 08:48:00 | 23.5 | 5/11/2011 16:01:01 | 24.626 |
| 9/11/2010 09:23:00 | 23.5 | 5/11/2011 16:37:01 | 24.626 |
| 9/11/2010 09:58:00 | 23.5 | 5/11/2011 17:13:01 | 24.626 |
| 9/11/2010 10:33:00 | 23.5 | 5/11/2011 17:49:01 | 24.626 |
| 9/11/2010 11:08:00 | 23.5 | 5/11/2011 18:25:01 | 24.626 |
| 9/11/2010 11:43:00 | 23.5 | 5/11/2011 19:01:01 | 24.626 |
| 9/11/2010 12:18:00 | 23.5 | 5/11/2011 19:37:01 | 24.626 |
| 9/11/2010 12:53:00 | 24.0 | 5/11/2011 20:13:01 | 24.626 |
| 9/11/2010 13:28:00 | 24.0 | 5/11/2011 20:49:01 | 24.626 |
| 9/11/2010 14:03:00 | 24.0 | 5/11/2011 21:25:01 | 24.626 |
| 9/11/2010 14:38:00 | 24.0 | 5/11/2011 22:01:01 | 24.626 |
| 9/11/2010 15:13:00 | 24.0 | 5/11/2011 22:37:01 | 24.626 |
| 9/11/2010 15:48:00 | 24.0 | 5/11/2011 23:13:01 | 24.626 |
| 9/11/2010 16:23:00 | 24.0 | 5/11/2011 23:49:01 | 24.626 |
| 9/11/2010 16:58:00 | 24.0 | 5/12/2011 00:25:01 | 24.626 |
| 9/11/2010 17:33:00 | 24.0 | 5/12/2011 01:01:01 | 24.626 |
| 9/11/2010 18:08:00 | 24.0 | 5/12/2011 01:37:01 | 24.626 |
| 9/11/2010 18:43:00 | 24.0 | 5/12/2011 02:13:01 | 24.626 |
| 9/11/2010 19:18:00 | 24.0 | 5/12/2011 02:49:01 | 24.626 |
| 9/11/2010 19:53:00 | 24.0 | 5/12/2011 03:25:01 | 24.626 |
| 9/11/2010 20:28:00 | 24.5 | 5/12/2011 04:01:01 | 24.126 |
| 9/11/2010 21:03:00 | 24.5 | 5/12/2011 04:37:01 | 24.626 |
| 9/11/2010 21:38:00 | 24.5 | 5/12/2011 05:13:01 | 24.626 |
| 9/11/2010 22:13:00 | 24.5 | 5/12/2011 05:49:01 | 24.626 |
| 9/11/2010 22:48:00 | 24.5 | 5/12/2011 06:25:01 | 24.626 |
| 9/11/2010 23:23:00 | 24.5 | 5/12/2011 07:01:01 | 24.626 |
| 9/11/2010 23:58:00 | 24.5 | 5/12/2011 07:37:01 | 24.626 |

|                    |      |                    |        |
|--------------------|------|--------------------|--------|
| 9/12/2010 00:33:00 | 24.5 | 5/12/2011 08:13:01 | 24.626 |
| 9/12/2010 01:08:00 | 24.5 | 5/12/2011 08:49:01 | 24.626 |
| 9/12/2010 01:43:00 | 24.5 | 5/12/2011 09:25:01 | 24.126 |
| 9/12/2010 02:18:00 | 24.5 | 5/12/2011 10:01:01 | 24.126 |
| 9/12/2010 02:53:00 | 24.5 | 5/12/2011 10:37:01 | 24.126 |
| 9/12/2010 03:28:00 | 24.5 | 5/12/2011 11:13:01 | 24.126 |
| 9/12/2010 04:03:00 | 24.5 | 5/12/2011 11:49:01 | 24.126 |
| 9/12/2010 04:38:00 | 24.5 | 5/12/2011 12:25:01 | 24.126 |
| 9/12/2010 05:13:00 | 24.5 | 5/12/2011 13:01:01 | 24.126 |
| 9/12/2010 05:48:00 | 24.5 | 5/12/2011 13:37:01 | 24.126 |
| 9/12/2010 06:23:00 | 24.0 | 5/12/2011 14:13:01 | 24.126 |
| 9/12/2010 06:58:00 | 24.0 | 5/12/2011 14:49:01 | 24.126 |
| 9/12/2010 07:33:00 | 24.0 | 5/12/2011 15:25:01 | 24.126 |
| 9/12/2010 08:08:00 | 24.0 | 5/12/2011 16:01:01 | 24.126 |
| 9/12/2010 08:43:00 | 24.0 | 5/12/2011 16:37:01 | 24.126 |
| 9/12/2010 09:18:00 | 24.0 | 5/12/2011 17:13:01 | 24.126 |
| 9/12/2010 09:53:00 | 24.0 | 5/12/2011 17:49:01 | 24.126 |
| 9/12/2010 10:28:00 | 24.0 | 5/12/2011 18:25:01 | 24.126 |
| 9/12/2010 11:03:00 | 24.0 | 5/12/2011 19:01:01 | 24.126 |
| 9/12/2010 11:38:00 | 24.0 | 5/12/2011 19:37:01 | 24.126 |
| 9/12/2010 12:13:00 | 24.0 | 5/12/2011 20:13:01 | 24.126 |
| 9/12/2010 12:48:00 | 24.0 | 5/12/2011 20:49:01 | 24.126 |
| 9/12/2010 13:23:00 | 24.0 | 5/12/2011 21:25:01 | 24.126 |
| 9/12/2010 13:58:00 | 24.5 | 5/12/2011 22:01:01 | 24.126 |
| 9/12/2010 14:33:00 | 24.5 | 5/12/2011 22:37:01 | 24.126 |
| 9/12/2010 15:08:00 | 24.5 | 5/12/2011 23:13:01 | 24.126 |
| 9/12/2010 15:43:00 | 24.5 | 5/12/2011 23:49:01 | 24.126 |
| 9/12/2010 16:18:00 | 24.5 | 5/13/2011 00:25:01 | 24.126 |
| 9/12/2010 16:53:00 | 24.5 | 5/13/2011 01:01:01 | 24.126 |
| 9/12/2010 17:28:00 | 24.5 | 5/13/2011 01:37:01 | 24.126 |
| 9/12/2010 18:03:00 | 24.5 | 5/13/2011 02:13:01 | 24.126 |
| 9/12/2010 18:38:00 | 24.5 | 5/13/2011 02:49:01 | 24.626 |
| 9/12/2010 19:13:00 | 24.5 | 5/13/2011 03:25:01 | 24.626 |
| 9/12/2010 19:48:00 | 24.5 | 5/13/2011 04:01:01 | 24.626 |
| 9/12/2010 20:23:00 | 24.5 | 5/13/2011 04:37:01 | 24.626 |
| 9/12/2010 20:58:00 | 24.5 | 5/13/2011 05:13:01 | 24.626 |
| 9/12/2010 21:33:00 | 24.5 | 5/13/2011 05:49:01 | 24.626 |
| 9/12/2010 22:08:00 | 24.5 | 5/13/2011 06:25:01 | 24.626 |
| 9/12/2010 22:43:00 | 24.5 | 5/13/2011 07:01:01 | 24.626 |
| 9/12/2010 23:18:00 | 24.5 | 5/13/2011 07:37:01 | 24.626 |
| 9/12/2010 23:53:00 | 24.5 | 5/13/2011 08:13:01 | 24.626 |
| 9/13/2010 00:28:00 | 24.5 | 5/13/2011 08:49:01 | 24.626 |
| 9/13/2010 01:03:00 | 24.5 | 5/13/2011 09:25:01 | 24.626 |
| 9/13/2010 01:38:00 | 24.5 | 5/13/2011 10:01:01 | 24.626 |
| 9/13/2010 02:13:00 | 24.5 | 5/13/2011 10:37:01 | 24.626 |
| 9/13/2010 02:48:00 | 24.5 | 5/13/2011 11:13:01 | 24.626 |
| 9/13/2010 03:23:00 | 24.5 | 5/13/2011 11:49:01 | 24.626 |
| 9/13/2010 03:58:00 | 24.5 | 5/13/2011 12:25:01 | 24.626 |
| 9/13/2010 04:33:00 | 24.5 | 5/13/2011 13:01:01 | 24.626 |
| 9/13/2010 05:08:00 | 24.5 | 5/13/2011 13:37:01 | 24.626 |

|                    |      |                    |        |
|--------------------|------|--------------------|--------|
| 9/13/2010 05:43:00 | 24.5 | 5/13/2011 14:13:01 | 24.626 |
| 9/13/2010 06:18:00 | 24.5 | 5/13/2011 14:49:01 | 24.626 |
| 9/13/2010 06:53:00 | 24.5 | 5/13/2011 15:25:01 | 24.626 |
| 9/13/2010 07:28:00 | 24.5 | 5/13/2011 16:01:01 | 24.626 |
| 9/13/2010 08:03:00 | 24.5 | 5/13/2011 16:37:01 | 24.626 |
| 9/13/2010 08:38:00 | 24.5 | 5/13/2011 17:13:01 | 24.626 |
| 9/13/2010 09:13:00 | 24.5 | 5/13/2011 17:49:01 | 24.626 |
| 9/13/2010 09:48:00 | 24.5 | 5/13/2011 18:25:01 | 24.626 |
| 9/13/2010 10:23:00 | 24.5 | 5/13/2011 19:01:01 | 24.626 |
| 9/13/2010 10:58:00 | 24.5 | 5/13/2011 19:37:01 | 24.626 |
| 9/13/2010 11:33:00 | 24.5 | 5/13/2011 20:13:01 | 24.626 |
| 9/13/2010 12:08:00 | 24.5 | 5/13/2011 20:49:01 | 24.626 |
| 9/13/2010 12:43:00 | 24.5 | 5/13/2011 21:25:01 | 24.626 |
| 9/13/2010 13:18:00 | 24.5 | 5/13/2011 22:01:01 | 24.626 |
| 9/13/2010 13:53:00 | 24.5 | 5/13/2011 22:37:01 | 24.626 |
| 9/13/2010 14:28:00 | 24.5 | 5/13/2011 23:13:01 | 24.626 |
| 9/13/2010 15:03:00 | 24.5 | 5/13/2011 23:49:01 | 24.626 |
| 9/13/2010 15:38:00 | 24.5 | 5/14/2011 00:25:01 | 24.626 |
| 9/13/2010 16:13:00 | 24.5 | 5/14/2011 01:01:01 | 24.626 |
| 9/13/2010 16:48:00 | 24.5 | 5/14/2011 01:37:01 | 24.626 |
| 9/13/2010 17:23:00 | 24.5 | 5/14/2011 02:13:01 | 24.626 |
| 9/13/2010 17:58:00 | 24.5 | 5/14/2011 02:49:01 | 24.626 |
| 9/13/2010 18:33:00 | 24.5 | 5/14/2011 03:25:01 | 24.626 |
| 9/13/2010 19:08:00 | 24.5 | 5/14/2011 04:01:01 | 24.626 |
| 9/13/2010 19:43:00 | 24.5 | 5/14/2011 04:37:01 | 24.626 |
| 9/13/2010 20:18:00 | 24.5 | 5/14/2011 05:13:01 | 24.626 |
| 9/13/2010 20:53:00 | 24.5 | 5/14/2011 05:49:01 | 24.626 |
| 9/13/2010 21:28:00 | 24.5 | 5/14/2011 06:25:01 | 24.626 |
| 9/13/2010 22:03:00 | 24.5 | 5/14/2011 07:01:01 | 24.626 |
| 9/13/2010 22:38:00 | 24.5 | 5/14/2011 07:37:01 | 24.626 |
| 9/13/2010 23:13:00 | 24.5 | 5/14/2011 08:13:01 | 24.626 |
| 9/13/2010 23:48:00 | 24.5 | 5/14/2011 08:49:01 | 24.626 |
| 9/14/2010 00:23:00 | 24.5 | 5/14/2011 09:25:01 | 24.626 |
| 9/14/2010 00:58:00 | 24.5 | 5/14/2011 10:01:01 | 24.626 |
| 9/14/2010 01:33:00 | 24.5 | 5/14/2011 10:37:01 | 24.626 |
| 9/14/2010 02:08:00 | 24.5 | 5/14/2011 11:13:01 | 24.626 |
| 9/14/2010 02:43:00 | 24.5 | 5/14/2011 11:49:01 | 24.626 |
| 9/14/2010 03:18:00 | 24.0 | 5/14/2011 12:25:01 | 24.626 |
| 9/14/2010 03:53:00 | 24.0 | 5/14/2011 13:01:01 | 24.626 |
| 9/14/2010 04:28:00 | 24.0 | 5/14/2011 13:37:01 | 24.626 |
| 9/14/2010 05:03:00 | 24.0 | 5/14/2011 14:13:01 | 24.626 |
| 9/14/2010 05:38:00 | 24.0 | 5/14/2011 14:49:01 | 24.626 |
| 9/14/2010 06:13:00 | 24.0 | 5/14/2011 15:25:01 | 24.626 |
| 9/14/2010 06:48:00 | 24.0 | 5/14/2011 16:01:01 | 24.626 |
| 9/14/2010 07:23:00 | 24.0 | 5/14/2011 16:37:01 | 24.626 |
| 9/14/2010 07:58:00 | 24.0 | 5/14/2011 17:13:01 | 24.626 |
| 9/14/2010 08:33:00 | 24.0 | 5/14/2011 17:49:01 | 24.626 |
| 9/14/2010 09:08:00 | 24.0 | 5/14/2011 18:25:01 | 24.626 |
| 9/14/2010 09:43:00 | 24.0 | 5/14/2011 19:01:01 | 24.626 |
| 9/14/2010 10:18:00 | 24.0 | 5/14/2011 19:37:01 | 24.626 |

|                    |      |                    |        |
|--------------------|------|--------------------|--------|
| 9/14/2010 10:53:00 | 24.0 | 5/14/2011 20:13:01 | 24.626 |
| 9/14/2010 11:28:00 | 24.0 | 5/14/2011 20:49:01 | 24.626 |
| 9/14/2010 12:03:00 | 24.0 | 5/14/2011 21:25:01 | 24.626 |
| 9/14/2010 12:38:00 | 24.0 | 5/14/2011 22:01:01 | 24.626 |
| 9/14/2010 13:13:00 | 24.0 | 5/14/2011 22:37:01 | 24.626 |
| 9/14/2010 13:48:00 | 24.0 | 5/14/2011 23:13:01 | 24.626 |
| 9/14/2010 14:23:00 | 24.0 | 5/14/2011 23:49:01 | 24.626 |
| 9/14/2010 14:58:00 | 24.0 | 5/15/2011 00:25:01 | 24.626 |
| 9/14/2010 15:33:00 | 24.0 | 5/15/2011 01:01:01 | 24.626 |
| 9/14/2010 16:08:00 | 24.0 | 5/15/2011 01:37:01 | 24.626 |
| 9/14/2010 16:43:00 | 24.0 | 5/15/2011 02:13:01 | 24.626 |
| 9/14/2010 17:18:00 | 24.0 | 5/15/2011 02:49:01 | 24.626 |
| 9/14/2010 17:53:00 | 24.0 | 5/15/2011 03:25:01 | 24.626 |
| 9/14/2010 18:28:00 | 24.5 | 5/15/2011 04:01:01 | 24.626 |
| 9/14/2010 19:03:00 | 24.5 | 5/15/2011 04:37:01 | 24.626 |
| 9/14/2010 19:38:00 | 24.5 | 5/15/2011 05:13:01 | 24.626 |
| 9/14/2010 20:13:00 | 24.5 | 5/15/2011 05:49:01 | 24.626 |
| 9/14/2010 20:48:00 | 24.5 | 5/15/2011 06:25:01 | 24.626 |
| 9/14/2010 21:23:00 | 24.5 | 5/15/2011 07:01:01 | 24.626 |
| 9/14/2010 21:58:00 | 24.5 | 5/15/2011 07:37:01 | 24.126 |
| 9/14/2010 22:33:00 | 24.0 | 5/15/2011 08:13:01 | 24.126 |
| 9/14/2010 23:08:00 | 24.0 | 5/15/2011 08:49:01 | 24.626 |
| 9/14/2010 23:43:00 | 24.0 | 5/15/2011 09:25:01 | 24.626 |
| 9/15/2010 00:18:00 | 24.0 | 5/15/2011 10:01:01 | 24.626 |
| 9/15/2010 00:53:00 | 24.0 | 5/15/2011 10:37:01 | 24.626 |
| 9/15/2010 01:28:00 | 24.0 | 5/15/2011 11:13:01 | 24.626 |
| 9/15/2010 02:03:00 | 24.0 | 5/15/2011 11:49:01 | 24.126 |
| 9/15/2010 02:38:00 | 24.0 | 5/15/2011 12:25:01 | 24.126 |
| 9/15/2010 03:13:00 | 24.0 | 5/15/2011 13:01:01 | 24.126 |
| 9/15/2010 03:48:00 | 24.0 | 5/15/2011 13:37:01 | 24.126 |
| 9/15/2010 04:23:00 | 24.0 | 5/15/2011 14:13:01 | 24.126 |
| 9/15/2010 04:58:00 | 24.0 | 5/15/2011 14:49:01 | 24.126 |
| 9/15/2010 05:33:00 | 24.0 | 5/15/2011 15:25:01 | 24.126 |
| 9/15/2010 06:08:00 | 24.0 | 5/15/2011 16:01:01 | 24.126 |
| 9/15/2010 06:43:00 | 24.0 | 5/15/2011 16:37:01 | 24.126 |
| 9/15/2010 07:18:00 | 24.0 | 5/15/2011 17:13:01 | 24.126 |
| 9/15/2010 07:53:00 | 24.0 | 5/15/2011 17:49:01 | 24.126 |
| 9/15/2010 08:28:00 | 24.0 | 5/15/2011 18:25:01 | 24.126 |
| 9/15/2010 09:03:00 | 24.0 | 5/15/2011 19:01:01 | 24.126 |
| 9/15/2010 09:38:00 | 24.0 | 5/15/2011 19:37:01 | 24.126 |
| 9/15/2010 10:13:00 | 24.0 | 5/15/2011 20:13:01 | 24.126 |
| 9/15/2010 10:48:00 | 24.0 | 5/15/2011 20:49:01 | 24.126 |
| 9/15/2010 11:23:00 | 23.5 | 5/15/2011 21:25:01 | 24.126 |
| 9/15/2010 11:58:00 | 24.0 | 5/15/2011 22:01:01 | 24.126 |
| 9/15/2010 12:33:00 | 24.0 | 5/15/2011 22:37:01 | 24.626 |
| 9/15/2010 13:08:00 | 24.0 | 5/15/2011 23:13:01 | 24.626 |
| 9/15/2010 13:43:00 | 24.0 | 5/15/2011 23:49:01 | 24.626 |
| 9/15/2010 14:18:00 | 24.0 | 5/16/2011 00:25:01 | 24.126 |
| 9/15/2010 14:53:00 | 24.0 | 5/16/2011 01:01:01 | 24.126 |
| 9/15/2010 15:28:00 | 24.0 | 5/16/2011 01:37:01 | 24.126 |

|                    |      |                    |        |
|--------------------|------|--------------------|--------|
| 9/15/2010 16:03:00 | 24.0 | 5/16/2011 02:13:01 | 24.126 |
| 9/15/2010 16:38:00 | 24.0 | 5/16/2011 02:49:01 | 24.126 |
| 9/15/2010 17:13:00 | 24.0 | 5/16/2011 03:25:01 | 24.126 |
| 9/15/2010 17:48:00 | 24.0 | 5/16/2011 04:01:01 | 24.126 |
| 9/15/2010 18:23:00 | 24.0 | 5/16/2011 04:37:01 | 24.126 |
| 9/15/2010 18:58:00 | 24.0 | 5/16/2011 05:13:01 | 24.126 |
| 9/15/2010 19:33:00 | 24.0 | 5/16/2011 05:49:01 | 24.126 |
| 9/15/2010 20:08:00 | 24.0 | 5/16/2011 06:25:01 | 24.126 |
| 9/15/2010 20:43:00 | 24.0 | 5/16/2011 07:01:01 | 24.126 |
| 9/15/2010 21:18:00 | 24.0 | 5/16/2011 07:37:01 | 24.126 |
| 9/15/2010 21:53:00 | 24.0 | 5/16/2011 08:13:01 | 24.126 |
| 9/15/2010 22:28:00 | 24.0 | 5/16/2011 08:49:01 | 24.126 |
| 9/15/2010 23:03:00 | 24.0 | 5/16/2011 09:25:01 | 24.626 |
| 9/15/2010 23:38:00 | 24.0 | 5/16/2011 10:01:01 | 24.126 |
| 9/16/2010 00:13:00 | 24.0 | 5/16/2011 10:37:01 | 24.126 |
| 9/16/2010 00:48:00 | 24.0 | 5/16/2011 11:13:01 | 24.126 |
| 9/16/2010 01:23:00 | 24.0 | 5/16/2011 11:49:01 | 24.126 |
| 9/16/2010 01:58:00 | 24.0 | 5/16/2011 12:25:01 | 24.126 |
| 9/16/2010 02:33:00 | 24.0 | 5/16/2011 13:01:01 | 24.126 |
| 9/16/2010 03:08:00 | 24.0 | 5/16/2011 13:37:01 | 24.126 |
| 9/16/2010 03:43:00 | 24.0 | 5/16/2011 14:13:01 | 24.126 |
| 9/16/2010 04:18:00 | 24.0 | 5/16/2011 14:49:01 | 24.126 |
| 9/16/2010 04:53:00 | 24.0 | 5/16/2011 15:25:01 | 24.126 |
| 9/16/2010 05:28:00 | 24.0 | 5/16/2011 16:01:01 | 24.126 |
| 9/16/2010 06:03:00 | 24.0 | 5/16/2011 16:37:01 | 24.126 |
| 9/16/2010 06:38:00 | 24.0 | 5/16/2011 17:13:01 | 24.626 |
| 9/16/2010 07:13:00 | 24.0 | 5/16/2011 17:49:01 | 24.626 |
| 9/16/2010 07:48:00 | 24.0 | 5/16/2011 18:25:01 | 24.626 |
| 9/16/2010 08:23:00 | 23.5 | 5/16/2011 19:01:01 | 24.626 |
| 9/16/2010 08:58:00 | 23.5 | 5/16/2011 19:37:01 | 24.126 |
| 9/16/2010 09:33:00 | 23.5 | 5/16/2011 20:13:01 | 24.126 |
| 9/16/2010 10:08:00 | 23.5 | 5/16/2011 20:49:01 | 24.126 |
| 9/16/2010 10:43:00 | 23.5 | 5/16/2011 21:25:01 | 24.126 |
| 9/16/2010 11:18:00 | 23.5 | 5/16/2011 22:01:01 | 24.126 |
| 9/16/2010 11:53:00 | 23.5 | 5/16/2011 22:37:01 | 24.126 |
| 9/16/2010 12:28:00 | 23.5 | 5/16/2011 23:13:01 | 24.126 |
| 9/16/2010 13:03:00 | 24.0 | 5/16/2011 23:49:01 | 24.126 |
| 9/16/2010 13:38:00 | 24.0 | 5/17/2011 00:25:01 | 24.126 |
| 9/16/2010 14:13:00 | 24.0 | 5/17/2011 01:01:01 | 24.126 |
| 9/16/2010 14:48:00 | 24.0 | 5/17/2011 01:37:01 | 24.126 |
| 9/16/2010 15:23:00 | 24.0 | 5/17/2011 02:13:01 | 24.126 |
| 9/16/2010 15:58:00 | 24.0 | 5/17/2011 02:49:01 | 24.126 |
| 9/16/2010 16:33:00 | 24.0 | 5/17/2011 03:25:01 | 24.126 |
| 9/16/2010 17:08:00 | 24.0 | 5/17/2011 04:01:01 | 24.126 |
| 9/16/2010 17:43:00 | 24.0 | 5/17/2011 04:37:01 | 24.126 |
| 9/16/2010 18:18:00 | 24.0 | 5/17/2011 05:13:01 | 24.126 |
| 9/16/2010 18:53:00 | 24.0 | 5/17/2011 05:49:01 | 24.126 |
| 9/16/2010 19:28:00 | 24.0 | 5/17/2011 06:25:01 | 24.126 |
| 9/16/2010 20:03:00 | 24.0 | 5/17/2011 07:01:01 | 24.126 |
| 9/16/2010 20:38:00 | 24.5 | 5/17/2011 07:37:01 | 24.126 |

|                    |      |                    |        |
|--------------------|------|--------------------|--------|
| 9/16/2010 21:13:00 | 24.5 | 5/17/2011 08:13:01 | 24.126 |
| 9/16/2010 21:48:00 | 24.5 | 5/17/2011 08:49:01 | 24.126 |
| 9/16/2010 22:23:00 | 24.5 | 5/17/2011 09:25:01 | 24.126 |
| 9/16/2010 22:58:00 | 24.5 | 5/17/2011 10:01:01 | 24.126 |
| 9/16/2010 23:33:00 | 24.5 | 5/17/2011 10:37:01 | 24.126 |
| 9/17/2010 00:08:00 | 24.5 | 5/17/2011 11:13:01 | 24.126 |
| 9/17/2010 00:43:00 | 24.5 | 5/17/2011 11:49:01 | 24.126 |
| 9/17/2010 01:18:00 | 24.5 | 5/17/2011 12:25:01 | 24.126 |
| 9/17/2010 01:53:00 | 24.5 | 5/17/2011 13:01:01 | 24.126 |
| 9/17/2010 02:28:00 | 24.5 | 5/17/2011 13:37:01 | 24.126 |
| 9/17/2010 03:03:00 | 24.5 | 5/17/2011 14:13:01 | 23.625 |
| 9/17/2010 03:38:00 | 24.5 | 5/17/2011 14:49:01 | 23.625 |
| 9/17/2010 04:13:00 | 24.5 | 5/17/2011 15:25:01 | 23.625 |
| 9/17/2010 04:48:00 | 24.0 | 5/17/2011 16:01:01 | 23.625 |
| 9/17/2010 05:23:00 | 24.0 | 5/17/2011 16:37:01 | 24.126 |
| 9/17/2010 05:58:00 | 24.0 | 5/17/2011 17:13:01 | 24.126 |
| 9/17/2010 06:33:00 | 24.0 | 5/17/2011 17:49:01 | 24.126 |
| 9/17/2010 07:08:00 | 24.0 | 5/17/2011 18:25:01 | 24.126 |
| 9/17/2010 07:43:00 | 24.0 | 5/17/2011 19:01:01 | 24.126 |
| 9/17/2010 08:18:00 | 24.0 | 5/17/2011 19:37:01 | 24.126 |
| 9/17/2010 08:53:00 | 24.0 | 5/17/2011 20:13:01 | 24.126 |
| 9/17/2010 09:28:00 | 24.0 | 5/17/2011 20:49:01 | 24.126 |
| 9/17/2010 10:03:00 | 24.0 | 5/17/2011 21:25:01 | 24.126 |
| 9/17/2010 10:38:00 | 24.0 | 5/17/2011 22:01:01 | 24.626 |
| 9/17/2010 11:13:00 | 24.0 | 5/17/2011 22:37:01 | 24.126 |
| 9/17/2010 11:48:00 | 24.0 | 5/17/2011 23:13:01 | 24.126 |
| 9/17/2010 12:23:00 | 24.0 | 5/17/2011 23:49:01 | 24.126 |
| 9/17/2010 12:58:00 | 24.0 | 5/18/2011 00:25:01 | 24.126 |
| 9/17/2010 13:33:00 | 24.0 | 5/18/2011 01:01:01 | 24.126 |
| 9/17/2010 14:08:00 | 24.0 | 5/18/2011 01:37:01 | 24.126 |
| 9/17/2010 14:43:00 | 24.0 | 5/18/2011 02:13:01 | 24.126 |
| 9/17/2010 15:18:00 | 24.5 | 5/18/2011 02:49:01 | 24.126 |
| 9/17/2010 15:53:00 | 24.5 | 5/18/2011 03:25:01 | 24.126 |
| 9/17/2010 16:28:00 | 24.5 | 5/18/2011 04:01:01 | 24.126 |
| 9/17/2010 17:03:00 | 24.5 | 5/18/2011 04:37:01 | 24.126 |
| 9/17/2010 17:38:00 | 24.5 | 5/18/2011 05:13:01 | 24.126 |
| 9/17/2010 18:13:00 | 24.5 | 5/18/2011 05:49:01 | 24.126 |
| 9/17/2010 18:48:00 | 24.5 | 5/18/2011 06:25:01 | 24.126 |
| 9/17/2010 19:23:00 | 24.5 | 5/18/2011 07:01:01 | 24.126 |
| 9/17/2010 19:58:00 | 24.5 | 5/18/2011 07:37:01 | 24.126 |
| 9/17/2010 20:33:00 | 24.5 | 5/18/2011 08:13:01 | 24.126 |
| 9/17/2010 21:08:00 | 24.5 | 5/18/2011 08:49:01 | 24.126 |
| 9/17/2010 21:43:00 | 24.5 | 5/18/2011 09:25:01 | 24.126 |
| 9/17/2010 22:18:00 | 24.5 | 5/18/2011 10:01:01 | 24.126 |
| 9/17/2010 22:53:00 | 24.5 | 5/18/2011 10:37:01 | 24.126 |
| 9/17/2010 23:28:00 | 24.5 | 5/18/2011 11:13:01 | 24.126 |
| 9/18/2010 00:03:00 | 24.5 | 5/18/2011 11:49:01 | 24.126 |
| 9/18/2010 00:38:00 | 24.5 | 5/18/2011 12:25:01 | 24.126 |
| 9/18/2010 01:13:00 | 24.5 | 5/18/2011 13:01:01 | 24.126 |
| 9/18/2010 01:48:00 | 24.5 | 5/18/2011 13:37:01 | 24.126 |

|                    |      |                    |        |
|--------------------|------|--------------------|--------|
| 9/18/2010 02:23:00 | 24.5 | 5/18/2011 14:13:01 | 24.126 |
| 9/18/2010 02:58:00 | 24.5 | 5/18/2011 14:49:01 | 23.625 |
| 9/18/2010 03:33:00 | 24.5 | 5/18/2011 15:25:01 | 23.625 |
| 9/18/2010 04:08:00 | 24.5 | 5/18/2011 16:01:01 | 23.625 |
| 9/18/2010 04:43:00 | 24.5 | 5/18/2011 16:37:01 | 23.625 |
| 9/18/2010 05:18:00 | 24.5 | 5/18/2011 17:13:01 | 23.625 |
| 9/18/2010 05:53:00 | 24.5 | 5/18/2011 17:49:01 | 23.625 |
| 9/18/2010 06:28:00 | 24.0 | 5/18/2011 18:25:01 | 23.625 |
| 9/18/2010 07:03:00 | 24.0 | 5/18/2011 19:01:01 | 23.625 |
| 9/18/2010 07:38:00 | 24.0 | 5/18/2011 19:37:01 | 23.625 |
| 9/18/2010 08:13:00 | 24.0 | 5/18/2011 20:13:01 | 23.625 |
| 9/18/2010 08:48:00 | 24.0 | 5/18/2011 20:49:01 | 23.625 |
| 9/18/2010 09:23:00 | 24.0 | 5/18/2011 21:25:01 | 23.625 |
| 9/18/2010 09:58:00 | 24.0 | 5/18/2011 22:01:01 | 23.625 |
| 9/18/2010 10:33:00 | 24.0 | 5/18/2011 22:37:01 | 23.625 |
| 9/18/2010 11:08:00 | 24.0 | 5/18/2011 23:13:01 | 23.625 |
| 9/18/2010 11:43:00 | 24.0 | 5/18/2011 23:49:01 | 23.625 |
| 9/18/2010 12:18:00 | 24.0 | 5/19/2011 00:25:01 | 23.625 |
| 9/18/2010 12:53:00 | 24.0 | 5/19/2011 01:01:01 | 23.625 |
| 9/18/2010 13:28:00 | 24.0 | 5/19/2011 01:37:01 | 23.625 |
| 9/18/2010 14:03:00 | 24.0 | 5/19/2011 02:13:01 | 23.625 |
| 9/18/2010 14:38:00 | 24.0 | 5/19/2011 02:49:01 | 23.625 |
| 9/18/2010 15:13:00 | 24.0 | 5/19/2011 03:25:01 | 23.625 |
| 9/18/2010 15:48:00 | 24.5 | 5/19/2011 04:01:01 | 23.625 |
| 9/18/2010 16:23:00 | 24.5 | 5/19/2011 04:37:01 | 23.625 |
| 9/18/2010 16:58:00 | 24.5 | 5/19/2011 05:13:01 | 23.625 |
| 9/18/2010 17:33:00 | 24.5 | 5/19/2011 05:49:01 | 23.625 |
| 9/18/2010 18:08:00 | 24.5 | 5/19/2011 06:25:01 | 23.625 |
| 9/18/2010 18:43:00 | 24.5 | 5/19/2011 07:01:01 | 23.625 |
| 9/18/2010 19:18:00 | 24.5 | 5/19/2011 07:37:01 | 23.625 |
| 9/18/2010 19:53:00 | 24.5 | 5/19/2011 08:13:01 | 23.625 |
| 9/18/2010 20:28:00 | 24.5 | 5/19/2011 08:49:01 | 24.126 |
| 9/18/2010 21:03:00 | 24.5 | 5/19/2011 09:25:01 | 24.126 |
| 9/18/2010 21:38:00 | 24.5 | 5/19/2011 10:01:01 | 24.126 |
| 9/18/2010 22:13:00 | 24.5 | 5/19/2011 10:37:01 | 23.625 |
| 9/18/2010 22:48:00 | 24.5 | 5/19/2011 11:13:01 | 24.126 |
| 9/18/2010 23:23:00 | 24.5 | 5/19/2011 11:49:01 | 23.625 |
| 9/18/2010 23:58:00 | 24.5 | 5/19/2011 12:25:01 | 23.625 |
| 9/19/2010 00:33:00 | 24.5 | 5/19/2011 13:01:01 | 23.625 |
| 9/19/2010 01:08:00 | 24.5 | 5/19/2011 13:37:01 | 23.625 |
| 9/19/2010 01:43:00 | 24.5 | 5/19/2011 14:13:01 | 23.625 |
| 9/19/2010 02:18:00 | 24.5 | 5/19/2011 14:49:01 | 23.625 |
| 9/19/2010 02:53:00 | 24.5 | 5/19/2011 15:25:01 | 23.625 |
| 9/19/2010 03:28:00 | 24.5 | 5/19/2011 16:01:01 | 23.625 |
| 9/19/2010 04:03:00 | 24.5 | 5/19/2011 16:37:01 | 23.625 |
| 9/19/2010 04:38:00 | 24.5 | 5/19/2011 17:13:01 | 23.625 |
| 9/19/2010 05:13:00 | 24.5 | 5/19/2011 17:49:01 | 23.625 |
| 9/19/2010 05:48:00 | 24.5 | 5/19/2011 18:25:01 | 23.625 |
| 9/19/2010 06:23:00 | 24.5 | 5/19/2011 19:01:01 | 23.625 |
| 9/19/2010 06:58:00 | 24.5 | 5/19/2011 19:37:01 | 23.625 |

|                    |      |                    |        |
|--------------------|------|--------------------|--------|
| 9/19/2010 07:33:00 | 24.0 | 5/19/2011 20:13:01 | 23.625 |
| 9/19/2010 08:08:00 | 24.0 | 5/19/2011 20:49:01 | 23.625 |
| 9/19/2010 08:43:00 | 24.0 | 5/19/2011 21:25:01 | 23.625 |
| 9/19/2010 09:18:00 | 24.0 | 5/19/2011 22:01:01 | 23.625 |
| 9/19/2010 09:53:00 | 24.0 | 5/19/2011 22:37:01 | 23.625 |
| 9/19/2010 10:28:00 | 24.0 | 5/19/2011 23:13:01 | 23.625 |
| 9/19/2010 11:03:00 | 24.0 | 5/19/2011 23:49:01 | 23.625 |
| 9/19/2010 11:38:00 | 24.0 | 5/20/2011 00:25:01 | 23.625 |
| 9/19/2010 12:13:00 | 24.0 | 5/20/2011 01:01:01 | 23.625 |
| 9/19/2010 12:48:00 | 24.0 | 5/20/2011 01:37:01 | 23.625 |
| 9/19/2010 13:23:00 | 24.0 | 5/20/2011 02:13:01 | 23.625 |
| 9/19/2010 13:58:00 | 24.0 | 5/20/2011 02:49:01 | 23.625 |
| 9/19/2010 14:33:00 | 24.0 | 5/20/2011 03:25:01 | 23.625 |
| 9/19/2010 15:08:00 | 24.0 | 5/20/2011 04:01:01 | 23.625 |
| 9/19/2010 15:43:00 | 24.5 | 5/20/2011 04:37:01 | 23.625 |
| 9/19/2010 16:18:00 | 24.5 | 5/20/2011 05:13:01 | 23.625 |
| 9/19/2010 16:53:00 | 24.5 | 5/20/2011 05:49:01 | 23.625 |
| 9/19/2010 17:28:00 | 24.5 | 5/20/2011 06:25:01 | 23.625 |
| 9/19/2010 18:03:00 | 24.5 | 5/20/2011 07:01:01 | 23.625 |
| 9/19/2010 18:38:00 | 24.5 | 5/20/2011 07:37:01 | 23.625 |
| 9/19/2010 19:13:00 | 24.5 | 5/20/2011 08:13:01 | 23.625 |
| 9/19/2010 19:48:00 | 24.5 | 5/20/2011 08:49:01 | 23.625 |
| 9/19/2010 20:23:00 | 24.5 | 5/20/2011 09:25:01 | 23.625 |
| 9/19/2010 20:58:00 | 24.5 | 5/20/2011 10:01:01 | 23.625 |
| 9/19/2010 21:33:00 | 24.5 | 5/20/2011 10:37:01 | 23.625 |
| 9/19/2010 22:08:00 | 24.5 | 5/20/2011 11:13:01 | 23.625 |
| 9/19/2010 22:43:00 | 24.5 | 5/20/2011 11:49:01 | 23.625 |
| 9/19/2010 23:18:00 | 24.5 | 5/20/2011 12:25:01 | 23.625 |
| 9/19/2010 23:53:00 | 24.5 | 5/20/2011 13:01:01 | 23.625 |
| 9/20/2010 00:28:00 | 24.5 | 5/20/2011 13:37:01 | 23.625 |
| 9/20/2010 01:03:00 | 24.5 | 5/20/2011 14:13:01 | 23.625 |
| 9/20/2010 01:38:00 | 24.5 | 5/20/2011 14:49:01 | 23.625 |
| 9/20/2010 02:13:00 | 24.5 | 5/20/2011 15:25:01 | 23.625 |
| 9/20/2010 02:48:00 | 24.5 | 5/20/2011 16:01:01 | 23.625 |
| 9/20/2010 03:23:00 | 24.5 | 5/20/2011 16:37:01 | 23.625 |
| 9/20/2010 03:58:00 | 24.5 | 5/20/2011 17:13:01 | 23.625 |
| 9/20/2010 04:33:00 | 24.5 | 5/20/2011 17:49:01 | 23.625 |
| 9/20/2010 05:08:00 | 24.5 | 5/20/2011 18:25:01 | 23.625 |
| 9/20/2010 05:43:00 | 24.5 | 5/20/2011 19:01:01 | 23.625 |
| 9/20/2010 06:18:00 | 24.5 | 5/20/2011 19:37:01 | 23.625 |
| 9/20/2010 06:53:00 | 24.5 | 5/20/2011 20:13:01 | 23.625 |
| 9/20/2010 07:28:00 | 24.5 | 5/20/2011 20:49:01 | 23.625 |
| 9/20/2010 08:03:00 | 24.0 | 5/20/2011 21:25:01 | 23.625 |
| 9/20/2010 08:38:00 | 24.0 | 5/20/2011 22:01:01 | 23.625 |
| 9/20/2010 09:13:00 | 24.0 | 5/20/2011 22:37:01 | 24.126 |
| 9/20/2010 09:48:00 | 24.0 | 5/20/2011 23:13:01 | 23.625 |
| 9/20/2010 10:23:00 | 24.0 | 5/20/2011 23:49:01 | 23.625 |
| 9/20/2010 10:58:00 | 24.0 | 5/21/2011 00:25:01 | 23.625 |
| 9/20/2010 11:33:00 | 24.0 | 5/21/2011 01:01:01 | 23.625 |
| 9/20/2010 12:08:00 | 24.0 | 5/21/2011 01:37:01 | 23.625 |



|                    |      |                    |        |
|--------------------|------|--------------------|--------|
| 9/20/2010 12:43:00 | 24.0 | 5/21/2011 02:13:01 | 23.625 |
| 9/20/2010 13:18:00 | 24.0 | 5/21/2011 02:49:01 | 23.625 |
| 9/20/2010 13:53:00 | 24.0 | 5/21/2011 03:25:01 | 23.625 |
| 9/20/2010 14:28:00 | 24.5 | 5/21/2011 04:01:01 | 23.625 |
| 9/20/2010 15:03:00 | 24.5 | 5/21/2011 04:37:01 | 23.625 |
| 9/20/2010 15:38:00 | 24.5 | 5/21/2011 05:13:01 | 23.625 |
| 9/20/2010 16:13:00 | 24.5 | 5/21/2011 05:49:01 | 23.625 |
| 9/20/2010 16:48:00 | 24.5 | 5/21/2011 06:25:01 | 23.625 |
| 9/20/2010 17:23:00 | 24.5 | 5/21/2011 07:01:01 | 23.625 |
| 9/20/2010 17:58:00 | 24.5 | 5/21/2011 07:37:01 | 23.625 |
| 9/20/2010 18:33:00 | 24.5 | 5/21/2011 08:13:01 | 23.625 |
| 9/20/2010 19:08:00 | 24.5 | 5/21/2011 08:49:01 | 23.625 |
| 9/20/2010 19:43:00 | 24.5 | 5/21/2011 09:25:01 | 23.625 |
| 9/20/2010 20:18:00 | 24.5 | 5/21/2011 10:01:01 | 23.625 |
| 9/20/2010 20:53:00 | 24.5 | 5/21/2011 10:37:01 | 23.625 |
| 9/20/2010 21:28:00 | 24.5 | 5/21/2011 11:13:01 | 23.625 |
| 9/20/2010 22:03:00 | 24.5 | 5/21/2011 11:49:01 | 23.625 |
| 9/20/2010 22:38:00 | 24.5 | 5/21/2011 12:25:01 | 23.625 |
| 9/20/2010 23:13:00 | 24.5 | 5/21/2011 13:01:01 | 23.625 |
| 9/20/2010 23:48:00 | 24.5 | 5/21/2011 13:37:01 | 23.625 |
| 9/21/2010 00:23:00 | 24.5 | 5/21/2011 14:13:01 | 23.625 |
| 9/21/2010 00:58:00 | 24.5 | 5/21/2011 14:49:01 | 23.625 |
| 9/21/2010 01:33:00 | 24.5 | 5/21/2011 15:25:01 | 23.625 |
| 9/21/2010 02:08:00 | 24.5 | 5/21/2011 16:01:01 | 23.625 |
| 9/21/2010 02:43:00 | 24.5 | 5/21/2011 16:37:01 | 23.625 |
| 9/21/2010 03:18:00 | 24.5 | 5/21/2011 17:13:01 | 23.625 |
| 9/21/2010 03:53:00 | 24.5 | 5/21/2011 17:49:01 | 23.625 |
| 9/21/2010 04:28:00 | 24.5 | 5/21/2011 18:25:01 | 23.625 |
| 9/21/2010 05:03:00 | 24.0 | 5/21/2011 19:01:01 | 23.625 |
| 9/21/2010 05:38:00 | 24.0 | 5/21/2011 19:37:01 | 23.625 |
| 9/21/2010 06:13:00 | 24.0 | 5/21/2011 20:13:01 | 23.625 |
| 9/21/2010 06:48:00 | 24.0 | 5/21/2011 20:49:01 | 23.625 |
| 9/21/2010 07:23:00 | 24.0 | 5/21/2011 21:25:01 | 23.625 |
| 9/21/2010 07:58:00 | 24.0 | 5/21/2011 22:01:01 | 23.625 |
| 9/21/2010 08:33:00 | 24.0 | 5/21/2011 22:37:01 | 23.625 |
| 9/21/2010 09:08:00 | 24.0 | 5/21/2011 23:13:01 | 23.625 |
| 9/21/2010 09:43:00 | 24.0 | 5/21/2011 23:49:01 | 23.625 |
| 9/21/2010 10:18:00 | 24.0 | 5/22/2011 00:25:01 | 23.625 |
| 9/21/2010 10:53:00 | 24.0 | 5/22/2011 01:01:01 | 23.625 |
| 9/21/2010 11:28:00 | 24.0 | 5/22/2011 01:37:01 | 23.625 |
| 9/21/2010 12:03:00 | 24.0 | 5/22/2011 02:13:01 | 23.625 |
| 9/21/2010 12:38:00 | 24.0 | 5/22/2011 02:49:01 | 23.625 |
| 9/21/2010 13:13:00 | 24.0 | 5/22/2011 03:25:01 | 23.625 |
| 9/21/2010 13:48:00 | 24.0 | 5/22/2011 04:01:01 | 23.625 |
| 9/21/2010 14:23:00 | 24.0 | 5/22/2011 04:37:01 | 23.625 |
| 9/21/2010 14:58:00 | 24.0 | 5/22/2011 05:13:01 | 23.625 |
| 9/21/2010 15:33:00 | 24.0 | 5/22/2011 05:49:01 | 23.625 |
| 9/21/2010 16:08:00 | 24.5 | 5/22/2011 06:25:01 | 23.625 |
| 9/21/2010 16:43:00 | 24.5 | 5/22/2011 07:01:01 | 23.625 |
| 9/21/2010 17:18:00 | 24.5 | 5/22/2011 07:37:01 | 23.625 |

|                    |      |                    |        |
|--------------------|------|--------------------|--------|
| 9/21/2010 17:53:00 | 24.5 | 5/22/2011 08:13:01 | 23.625 |
| 9/21/2010 18:28:00 | 24.5 | 5/22/2011 08:49:01 | 23.625 |
| 9/21/2010 19:03:00 | 24.5 | 5/22/2011 09:25:01 | 23.625 |
| 9/21/2010 19:38:00 | 24.5 | 5/22/2011 10:01:01 | 23.625 |
| 9/21/2010 20:13:00 | 24.5 | 5/22/2011 10:37:01 | 23.625 |
| 9/21/2010 20:48:00 | 24.5 | 5/22/2011 11:13:01 | 23.625 |
| 9/21/2010 21:23:00 | 24.5 | 5/22/2011 11:49:01 | 23.625 |
| 9/21/2010 21:58:00 | 24.5 | 5/22/2011 12:25:01 | 23.125 |
| 9/21/2010 22:33:00 | 24.5 | 5/22/2011 13:01:01 | 23.125 |
| 9/21/2010 23:08:00 | 24.5 | 5/22/2011 13:37:01 | 23.125 |
| 9/21/2010 23:43:00 | 24.5 | 5/22/2011 14:13:01 | 23.125 |
| 9/22/2010 00:18:00 | 24.5 | 5/22/2011 14:49:01 | 23.125 |
| 9/22/2010 00:53:00 | 24.5 | 5/22/2011 15:25:01 | 23.125 |
| 9/22/2010 01:28:00 | 24.5 | 5/22/2011 16:01:01 | 23.125 |
| 9/22/2010 02:03:00 | 24.5 | 5/22/2011 16:37:01 | 23.125 |
| 9/22/2010 02:38:00 | 24.5 | 5/22/2011 17:13:01 | 23.125 |
| 9/22/2010 03:13:00 | 24.5 | 5/22/2011 17:49:01 | 23.625 |
| 9/22/2010 03:48:00 | 24.5 | 5/22/2011 18:25:01 | 23.625 |
| 9/22/2010 04:23:00 | 24.5 | 5/22/2011 19:01:01 | 23.125 |
| 9/22/2010 04:58:00 | 24.5 | 5/22/2011 19:37:01 | 23.625 |
| 9/22/2010 05:33:00 | 24.5 | 5/22/2011 20:13:01 | 23.625 |
| 9/22/2010 06:08:00 | 24.5 | 5/22/2011 20:49:01 | 23.625 |
| 9/22/2010 06:43:00 | 24.5 | 5/22/2011 21:25:01 | 23.625 |
| 9/22/2010 07:18:00 | 24.5 | 5/22/2011 22:01:01 | 23.625 |
| 9/22/2010 07:53:00 | 24.5 | 5/22/2011 22:37:01 | 23.625 |
| 9/22/2010 08:28:00 | 24.0 | 5/22/2011 23:13:01 | 23.625 |
| 9/22/2010 09:03:00 | 24.0 | 5/22/2011 23:49:01 | 23.625 |
| 9/22/2010 09:38:00 | 24.0 | 5/23/2011 00:25:01 | 23.625 |
| 9/22/2010 10:13:00 | 24.0 | 5/23/2011 01:01:01 | 23.625 |
| 9/22/2010 10:48:00 | 24.0 | 5/23/2011 01:37:01 | 23.625 |
| 9/22/2010 11:23:00 | 24.0 | 5/23/2011 02:13:01 | 23.625 |
| 9/22/2010 11:58:00 | 24.0 | 5/23/2011 02:49:01 | 23.625 |
| 9/22/2010 12:33:00 | 24.5 | 5/23/2011 03:25:01 | 23.625 |
| 9/22/2010 13:08:00 | 24.5 | 5/23/2011 04:01:01 | 23.625 |
| 9/22/2010 13:43:00 | 24.5 | 5/23/2011 04:37:01 | 23.625 |
| 9/22/2010 14:18:00 | 24.5 | 5/23/2011 05:13:01 | 23.625 |
| 9/22/2010 14:53:00 | 24.5 | 5/23/2011 05:49:01 | 23.625 |
| 9/22/2010 15:28:00 | 24.5 | 5/23/2011 06:25:01 | 23.625 |
| 9/22/2010 16:03:00 | 24.5 | 5/23/2011 07:01:01 | 23.625 |
| 9/22/2010 16:38:00 | 24.5 | 5/23/2011 07:37:01 | 23.625 |
| 9/22/2010 17:13:00 | 24.5 | 5/23/2011 08:13:01 | 23.625 |
| 9/22/2010 17:48:00 | 24.5 | 5/23/2011 08:49:01 | 23.625 |
| 9/22/2010 18:23:00 | 24.5 | 5/23/2011 09:25:01 | 23.625 |
| 9/22/2010 18:58:00 | 24.5 | 5/23/2011 10:01:01 | 23.625 |
| 9/22/2010 19:33:00 | 24.5 | 5/23/2011 10:37:01 | 23.625 |
| 9/22/2010 20:08:00 | 24.5 | 5/23/2011 11:13:01 | 23.625 |
| 9/22/2010 20:43:00 | 24.5 | 5/23/2011 11:49:01 | 23.625 |
| 9/22/2010 21:18:00 | 24.5 | 5/23/2011 12:25:01 | 23.625 |
| 9/22/2010 21:53:00 | 24.5 | 5/23/2011 13:01:01 | 23.625 |
| 9/22/2010 22:28:00 | 24.5 | 5/23/2011 13:37:01 | 23.625 |

|                    |      |                    |        |
|--------------------|------|--------------------|--------|
| 9/22/2010 23:03:00 | 24.5 | 5/23/2011 14:13:01 | 23.625 |
| 9/22/2010 23:38:00 | 25.0 | 5/23/2011 14:49:01 | 23.625 |
| 9/23/2010 00:13:00 | 25.0 | 5/23/2011 15:25:01 | 23.625 |
| 9/23/2010 00:48:00 | 25.0 | 5/23/2011 16:01:01 | 23.625 |
| 9/23/2010 01:23:00 | 25.0 | 5/23/2011 16:37:01 | 23.625 |
| 9/23/2010 01:58:00 | 25.0 | 5/23/2011 17:13:01 | 23.625 |
| 9/23/2010 02:33:00 | 25.0 | 5/23/2011 17:49:01 | 23.625 |
| 9/23/2010 03:08:00 | 24.5 | 5/23/2011 18:25:01 | 23.625 |
| 9/23/2010 03:43:00 | 24.5 | 5/23/2011 19:01:01 | 23.625 |
| 9/23/2010 04:18:00 | 24.5 | 5/23/2011 19:37:01 | 23.625 |
| 9/23/2010 04:53:00 | 24.5 | 5/23/2011 20:13:01 | 23.625 |
| 9/23/2010 05:28:00 | 24.5 | 5/23/2011 20:49:01 | 23.625 |
| 9/23/2010 06:03:00 | 24.5 | 5/23/2011 21:25:01 | 23.625 |
| 9/23/2010 06:38:00 | 24.5 | 5/23/2011 22:01:01 | 23.625 |
| 9/23/2010 07:13:00 | 24.5 | 5/23/2011 22:37:01 | 23.625 |
| 9/23/2010 07:48:00 | 24.5 | 5/23/2011 23:13:01 | 23.625 |
| 9/23/2010 08:23:00 | 24.5 | 5/23/2011 23:49:01 | 23.625 |
| 9/23/2010 08:58:00 | 24.5 | 5/24/2011 00:25:01 | 23.625 |
| 9/23/2010 09:33:00 | 24.5 | 5/24/2011 01:01:01 | 23.625 |
| 9/23/2010 10:08:00 | 24.5 | 5/24/2011 01:37:01 | 23.625 |
| 9/23/2010 10:43:00 | 24.5 | 5/24/2011 02:13:01 | 23.625 |
| 9/23/2010 11:18:00 | 24.5 | 5/24/2011 02:49:01 | 23.625 |
| 9/23/2010 11:53:00 | 24.5 | 5/24/2011 03:25:01 | 23.625 |
| 9/23/2010 12:28:00 | 24.5 | 5/24/2011 04:01:01 | 23.625 |
| 9/23/2010 13:03:00 | 24.5 | 5/24/2011 04:37:01 | 23.625 |
| 9/23/2010 13:38:00 | 24.5 | 5/24/2011 05:13:01 | 24.126 |
| 9/23/2010 14:13:00 | 24.5 | 5/24/2011 05:49:01 | 24.126 |
| 9/23/2010 14:48:00 | 24.5 | 5/24/2011 06:25:01 | 24.126 |
| 9/23/2010 15:23:00 | 24.5 | 5/24/2011 07:01:01 | 24.126 |
| 9/23/2010 15:58:00 | 24.5 | 5/24/2011 07:37:01 | 24.126 |
| 9/23/2010 16:33:00 | 24.5 | 5/24/2011 08:13:01 | 24.126 |
| 9/23/2010 17:08:00 | 25.0 | 5/24/2011 08:49:01 | 23.625 |
| 9/23/2010 17:43:00 | 25.0 | 5/24/2011 09:25:01 | 23.625 |
| 9/23/2010 18:18:00 | 25.0 | 5/24/2011 10:01:01 | 23.625 |
| 9/23/2010 18:53:00 | 25.0 | 5/24/2011 10:37:01 | 23.625 |
| 9/23/2010 19:28:00 | 25.0 | 5/24/2011 11:13:01 | 23.625 |
| 9/23/2010 20:03:00 | 25.0 | 5/24/2011 11:49:01 | 23.625 |
| 9/23/2010 20:38:00 | 25.0 | 5/24/2011 12:25:01 | 23.625 |
| 9/23/2010 21:13:00 | 25.0 | 5/24/2011 13:01:01 | 23.625 |
| 9/23/2010 21:48:00 | 25.0 | 5/24/2011 13:37:01 | 23.625 |
| 9/23/2010 22:23:00 | 25.0 | 5/24/2011 14:13:01 | 23.625 |
| 9/23/2010 22:58:00 | 25.0 | 5/24/2011 14:49:01 | 23.625 |
| 9/23/2010 23:33:00 | 25.0 | 5/24/2011 15:25:01 | 23.625 |
| 9/24/2010 00:08:00 | 25.0 | 5/24/2011 16:01:01 | 23.625 |
| 9/24/2010 00:43:00 | 25.0 | 5/24/2011 16:37:01 | 23.625 |
| 9/24/2010 01:18:00 | 25.0 | 5/24/2011 17:13:01 | 23.625 |
| 9/24/2010 01:53:00 | 25.0 | 5/24/2011 17:49:01 | 23.625 |
| 9/24/2010 02:28:00 | 25.0 | 5/24/2011 18:25:01 | 23.625 |
| 9/24/2010 03:03:00 | 25.0 | 5/24/2011 19:01:01 | 23.625 |
| 9/24/2010 03:38:00 | 25.0 | 5/24/2011 19:37:01 | 23.625 |

|                    |      |                    |        |
|--------------------|------|--------------------|--------|
| 9/24/2010 04:13:00 | 25.0 | 5/24/2011 20:13:01 | 23.625 |
| 9/24/2010 04:48:00 | 25.0 | 5/24/2011 20:49:01 | 23.625 |
| 9/24/2010 05:23:00 | 25.0 | 5/24/2011 21:25:01 | 23.625 |
| 9/24/2010 05:58:00 | 25.0 | 5/24/2011 22:01:01 | 23.625 |
| 9/24/2010 06:33:00 | 25.0 | 5/24/2011 22:37:01 | 23.625 |
| 9/24/2010 07:08:00 | 25.0 | 5/24/2011 23:13:01 | 23.625 |
| 9/24/2010 07:43:00 | 24.5 | 5/24/2011 23:49:01 | 23.625 |
| 9/24/2010 08:18:00 | 24.5 | 5/25/2011 00:25:01 | 23.625 |
| 9/24/2010 08:53:00 | 24.5 | 5/25/2011 01:01:01 | 23.625 |
| 9/24/2010 09:28:00 | 24.5 | 5/25/2011 01:37:01 | 23.625 |
| 9/24/2010 10:03:00 | 24.5 | 5/25/2011 02:13:01 | 23.625 |
| 9/24/2010 10:38:00 | 24.5 | 5/25/2011 02:49:01 | 23.625 |
| 9/24/2010 11:13:00 | 24.5 | 5/25/2011 03:25:01 | 23.625 |
| 9/24/2010 11:48:00 | 24.5 | 5/25/2011 04:01:01 | 23.625 |
| 9/24/2010 12:23:00 | 24.5 | 5/25/2011 04:37:01 | 23.625 |
| 9/24/2010 12:58:00 | 24.5 | 5/25/2011 05:13:01 | 23.625 |
| 9/24/2010 13:33:00 | 24.5 | 5/25/2011 05:49:01 | 23.625 |
| 9/24/2010 14:08:00 | 24.5 | 5/25/2011 06:25:01 | 24.126 |
| 9/24/2010 14:43:00 | 24.5 | 5/25/2011 07:01:01 | 24.126 |
| 9/24/2010 15:18:00 | 24.5 | 5/25/2011 07:37:01 | 24.126 |
| 9/24/2010 15:53:00 | 24.5 | 5/25/2011 08:13:01 | 23.625 |
| 9/24/2010 16:28:00 | 24.5 | 5/25/2011 08:49:01 | 23.625 |
| 9/24/2010 17:03:00 | 24.5 | 5/25/2011 09:25:01 | 23.625 |
| 9/24/2010 17:38:00 | 25.0 | 5/25/2011 10:01:01 | 23.625 |
| 9/24/2010 18:13:00 | 25.0 | 5/25/2011 10:37:01 | 23.625 |
| 9/24/2010 18:48:00 | 25.0 | 5/25/2011 11:13:01 | 23.625 |
| 9/24/2010 19:23:00 | 25.0 | 5/25/2011 11:49:01 | 23.625 |
| 9/24/2010 19:58:00 | 25.0 | 5/25/2011 12:25:01 | 23.625 |
| 9/24/2010 20:33:00 | 25.0 | 5/25/2011 13:01:01 | 23.625 |
| 9/24/2010 21:08:00 | 25.0 | 5/25/2011 13:37:01 | 23.625 |
| 9/24/2010 21:43:00 | 25.0 | 5/25/2011 14:13:01 | 23.625 |
| 9/24/2010 22:18:00 | 25.0 | 5/25/2011 14:49:01 | 23.625 |
| 9/24/2010 22:53:00 | 25.0 | 5/25/2011 15:25:01 | 23.625 |
| 9/24/2010 23:28:00 | 25.0 | 5/25/2011 16:01:01 | 23.625 |
| 9/25/2010 00:03:00 | 25.0 | 5/25/2011 16:37:01 | 23.625 |
| 9/25/2010 00:38:00 | 25.0 | 5/25/2011 17:13:01 | 23.625 |
| 9/25/2010 01:13:00 | 24.5 | 5/25/2011 17:49:01 | 23.625 |
| 9/25/2010 01:48:00 | 24.5 | 5/25/2011 18:25:01 | 23.625 |
| 9/25/2010 02:23:00 | 24.5 | 5/25/2011 19:01:01 | 23.625 |
| 9/25/2010 02:58:00 | 24.5 | 5/25/2011 19:37:01 | 23.625 |
| 9/25/2010 03:33:00 | 24.5 | 5/25/2011 20:13:01 | 23.625 |
| 9/25/2010 04:08:00 | 24.5 | 5/25/2011 20:49:01 | 23.625 |
| 9/25/2010 04:43:00 | 24.5 | 5/25/2011 21:25:01 | 23.625 |
| 9/25/2010 05:18:00 | 24.5 | 5/25/2011 22:01:01 | 24.126 |
| 9/25/2010 05:53:00 | 24.5 | 5/25/2011 22:37:01 | 24.126 |
| 9/25/2010 06:28:00 | 24.5 | 5/25/2011 23:13:01 | 24.126 |
| 9/25/2010 07:03:00 | 24.5 | 5/25/2011 23:49:01 | 24.126 |
| 9/25/2010 07:38:00 | 24.5 | 5/26/2011 00:25:01 | 24.126 |
| 9/25/2010 08:13:00 | 24.5 | 5/26/2011 01:01:01 | 24.126 |
| 9/25/2010 08:48:00 | 24.5 | 5/26/2011 01:37:01 | 24.126 |

|                    |      |                    |        |
|--------------------|------|--------------------|--------|
| 9/25/2010 09:23:00 | 24.5 | 5/26/2011 02:13:01 | 24.126 |
| 9/25/2010 09:58:00 | 24.5 | 5/26/2011 02:49:01 | 24.126 |
| 9/25/2010 10:33:00 | 24.5 | 5/26/2011 03:25:01 | 24.126 |
| 9/25/2010 11:08:00 | 24.5 | 5/26/2011 04:01:01 | 24.126 |
| 9/25/2010 11:43:00 | 24.5 | 5/26/2011 04:37:01 | 24.126 |
| 9/25/2010 12:18:00 | 24.5 | 5/26/2011 05:13:01 | 24.126 |
| 9/25/2010 12:53:00 | 24.5 | 5/26/2011 05:49:01 | 24.126 |
| 9/25/2010 13:28:00 | 24.5 | 5/26/2011 06:25:01 | 24.126 |
| 9/25/2010 14:03:00 | 24.5 | 5/26/2011 07:01:01 | 24.126 |
| 9/25/2010 14:38:00 | 24.5 | 5/26/2011 07:37:01 | 24.126 |
| 9/25/2010 15:13:00 | 24.5 | 5/26/2011 08:13:01 | 24.126 |
| 9/25/2010 15:48:00 | 24.5 | 5/26/2011 08:49:01 | 24.126 |
| 9/25/2010 16:23:00 | 24.5 | 5/26/2011 09:25:01 | 24.126 |
| 9/25/2010 16:58:00 | 24.5 | 5/26/2011 10:01:01 | 24.126 |
| 9/25/2010 17:33:00 | 24.5 | 5/26/2011 10:37:01 | 24.126 |
| 9/25/2010 18:08:00 | 24.5 | 5/26/2011 11:13:01 | 24.126 |
| 9/25/2010 18:43:00 | 24.5 | 5/26/2011 11:49:01 | 24.126 |
| 9/25/2010 19:18:00 | 24.5 | 5/26/2011 12:25:01 | 24.126 |
| 9/25/2010 19:53:00 | 24.5 | 5/26/2011 13:01:01 | 24.126 |
| 9/25/2010 20:28:00 | 24.5 | 5/26/2011 13:37:01 | 24.126 |
| 9/25/2010 21:03:00 | 24.5 | 5/26/2011 14:13:01 | 24.126 |
| 9/25/2010 21:38:00 | 24.5 | 5/26/2011 14:49:01 | 24.126 |
| 9/25/2010 22:13:00 | 24.5 | 5/26/2011 15:25:01 | 24.126 |
| 9/25/2010 22:48:00 | 24.5 | 5/26/2011 16:01:01 | 24.126 |
| 9/25/2010 23:23:00 | 24.5 | 5/26/2011 16:37:01 | 24.126 |
| 9/25/2010 23:58:00 | 24.5 | 5/26/2011 17:13:01 | 24.126 |
| 9/26/2010 00:33:00 | 24.5 | 5/26/2011 17:49:01 | 24.126 |
| 9/26/2010 01:08:00 | 24.5 | 5/26/2011 18:25:01 | 24.126 |
| 9/26/2010 01:43:00 | 24.5 | 5/26/2011 19:01:01 | 24.126 |
| 9/26/2010 02:18:00 | 24.5 | 5/26/2011 19:37:01 | 24.126 |
| 9/26/2010 02:53:00 | 24.5 | 5/26/2011 20:13:01 | 24.126 |
| 9/26/2010 03:28:00 | 24.5 | 5/26/2011 20:49:01 | 24.126 |
| 9/26/2010 04:03:00 | 24.5 | 5/26/2011 21:25:01 | 24.126 |
| 9/26/2010 04:38:00 | 24.5 | 5/26/2011 22:01:01 | 24.126 |
| 9/26/2010 05:13:00 | 24.5 | 5/26/2011 22:37:01 | 24.126 |
| 9/26/2010 05:48:00 | 24.5 | 5/26/2011 23:13:01 | 24.126 |
| 9/26/2010 06:23:00 | 24.5 | 5/26/2011 23:49:01 | 24.126 |
| 9/26/2010 06:58:00 | 24.5 | 5/27/2011 00:25:01 | 24.126 |
| 9/26/2010 07:33:00 | 24.5 | 5/27/2011 01:01:01 | 24.126 |
| 9/26/2010 08:08:00 | 24.5 | 5/27/2011 01:37:01 | 24.126 |
| 9/26/2010 08:43:00 | 24.5 | 5/27/2011 02:13:01 | 24.126 |
| 9/26/2010 09:18:00 | 24.5 | 5/27/2011 02:49:01 | 24.126 |
| 9/26/2010 09:53:00 | 24.5 | 5/27/2011 03:25:01 | 24.126 |
| 9/26/2010 10:28:00 | 24.5 | 5/27/2011 04:01:01 | 24.126 |
| 9/26/2010 11:03:00 | 24.5 | 5/27/2011 04:37:01 | 24.126 |
| 9/26/2010 11:38:00 | 24.5 | 5/27/2011 05:13:01 | 24.126 |
| 9/26/2010 12:13:00 | 24.5 | 5/27/2011 05:49:01 | 24.126 |
| 9/26/2010 12:48:00 | 24.5 | 5/27/2011 06:25:01 | 24.126 |
| 9/26/2010 13:23:00 | 24.5 | 5/27/2011 07:01:01 | 24.126 |
| 9/26/2010 13:58:00 | 24.5 | 5/27/2011 07:37:01 | 24.126 |

|                    |      |                    |        |
|--------------------|------|--------------------|--------|
| 9/26/2010 14:33:00 | 24.5 | 5/27/2011 08:13:01 | 24.126 |
| 9/26/2010 15:08:00 | 24.5 | 5/27/2011 08:49:01 | 24.126 |
| 9/26/2010 15:43:00 | 24.5 | 5/27/2011 09:25:01 | 24.126 |
| 9/26/2010 16:18:00 | 24.5 | 5/27/2011 10:01:01 | 24.126 |
| 9/26/2010 16:53:00 | 24.5 | 5/27/2011 10:37:01 | 24.126 |
| 9/26/2010 17:28:00 | 24.5 | 5/27/2011 11:13:01 | 24.126 |
| 9/26/2010 18:03:00 | 24.5 | 5/27/2011 11:49:01 | 24.126 |
| 9/26/2010 18:38:00 | 24.5 | 5/27/2011 12:25:01 | 24.126 |
| 9/26/2010 19:13:00 | 24.5 | 5/27/2011 13:01:01 | 24.126 |
| 9/26/2010 19:48:00 | 24.5 | 5/27/2011 13:37:01 | 24.126 |
| 9/26/2010 20:23:00 | 24.5 | 5/27/2011 14:13:01 | 24.126 |
| 9/26/2010 20:58:00 | 24.5 | 5/27/2011 14:49:01 | 24.126 |
| 9/26/2010 21:33:00 | 24.5 | 5/27/2011 15:25:01 | 24.126 |
| 9/26/2010 22:08:00 | 24.5 | 5/27/2011 16:01:01 | 24.126 |
| 9/26/2010 22:43:00 | 24.5 | 5/27/2011 16:37:01 | 24.126 |
| 9/26/2010 23:18:00 | 24.5 | 5/27/2011 17:13:01 | 24.126 |
| 9/26/2010 23:53:00 | 24.5 | 5/27/2011 17:49:01 | 24.126 |
| 9/27/2010 00:28:00 | 24.5 | 5/27/2011 18:25:01 | 24.126 |
| 9/27/2010 01:03:00 | 24.5 | 5/27/2011 19:01:01 | 24.126 |
| 9/27/2010 01:38:00 | 24.5 | 5/27/2011 19:37:01 | 24.126 |
| 9/27/2010 02:13:00 | 24.5 | 5/27/2011 20:13:01 | 24.126 |
| 9/27/2010 02:48:00 | 24.5 | 5/27/2011 20:49:01 | 24.126 |
| 9/27/2010 03:23:00 | 24.5 | 5/27/2011 21:25:01 | 24.126 |
| 9/27/2010 03:58:00 | 24.5 | 5/27/2011 22:01:01 | 24.126 |
| 9/27/2010 04:33:00 | 24.5 | 5/27/2011 22:37:01 | 24.126 |
| 9/27/2010 05:08:00 | 24.5 | 5/27/2011 23:13:01 | 24.126 |
| 9/27/2010 05:43:00 | 24.5 | 5/27/2011 23:49:01 | 24.126 |
| 9/27/2010 06:18:00 | 24.5 | 5/28/2011 00:25:01 | 24.126 |
| 9/27/2010 06:53:00 | 24.5 | 5/28/2011 01:01:01 | 24.126 |
| 9/27/2010 07:28:00 | 24.5 | 5/28/2011 01:37:01 | 24.126 |
| 9/27/2010 08:03:00 | 24.5 | 5/28/2011 02:13:01 | 24.126 |
| 9/27/2010 08:38:00 | 24.5 | 5/28/2011 02:49:01 | 24.126 |
| 9/27/2010 09:13:00 | 24.0 | 5/28/2011 03:25:01 | 24.126 |
| 9/27/2010 09:48:00 | 24.0 | 5/28/2011 04:01:01 | 24.126 |
| 9/27/2010 10:23:00 | 24.0 | 5/28/2011 04:37:01 | 24.126 |
| 9/27/2010 10:58:00 | 24.0 | 5/28/2011 05:13:01 | 24.126 |
| 9/27/2010 11:33:00 | 24.0 | 5/28/2011 05:49:01 | 24.126 |
| 9/27/2010 12:08:00 | 24.0 | 5/28/2011 06:25:01 | 24.126 |
| 9/27/2010 12:43:00 | 24.0 | 5/28/2011 07:01:01 | 24.126 |
| 9/27/2010 13:18:00 | 24.5 | 5/28/2011 07:37:01 | 24.126 |
| 9/27/2010 13:53:00 | 24.5 | 5/28/2011 08:13:01 | 24.126 |
| 9/27/2010 14:28:00 | 24.5 | 5/28/2011 08:49:01 | 24.126 |
| 9/27/2010 15:03:00 | 24.5 | 5/28/2011 09:25:01 | 24.126 |
| 9/27/2010 15:38:00 | 24.5 | 5/28/2011 10:01:01 | 24.126 |
| 9/27/2010 16:13:00 | 24.5 | 5/28/2011 10:37:01 | 24.126 |
| 9/27/2010 16:48:00 | 24.5 | 5/28/2011 11:13:01 | 24.126 |
| 9/27/2010 17:23:00 | 24.5 | 5/28/2011 11:49:01 | 24.126 |
| 9/27/2010 17:58:00 | 24.5 | 5/28/2011 12:25:01 | 23.625 |
| 9/27/2010 18:33:00 | 24.5 | 5/28/2011 13:01:01 | 24.126 |
| 9/27/2010 19:08:00 | 24.5 | 5/28/2011 13:37:01 | 23.625 |

|                    |      |                    |        |
|--------------------|------|--------------------|--------|
| 9/27/2010 19:43:00 | 24.5 | 5/28/2011 14:13:01 | 23.625 |
| 9/27/2010 20:18:00 | 24.5 | 5/28/2011 14:49:01 | 23.625 |
| 9/27/2010 20:53:00 | 24.5 | 5/28/2011 15:25:01 | 23.625 |
| 9/27/2010 21:28:00 | 24.5 | 5/28/2011 16:01:01 | 23.625 |
| 9/27/2010 22:03:00 | 24.5 | 5/28/2011 16:37:01 | 23.625 |
| 9/27/2010 22:38:00 | 24.5 | 5/28/2011 17:13:01 | 23.625 |
| 9/27/2010 23:13:00 | 24.5 | 5/28/2011 17:49:01 | 23.625 |
| 9/27/2010 23:48:00 | 24.5 | 5/28/2011 18:25:01 | 23.625 |
| 9/28/2010 00:23:00 | 24.5 | 5/28/2011 19:01:01 | 24.126 |
| 9/28/2010 00:58:00 | 24.5 | 5/28/2011 19:37:01 | 24.126 |
| 9/28/2010 01:33:00 | 24.5 | 5/28/2011 20:13:01 | 24.126 |
| 9/28/2010 02:08:00 | 24.5 | 5/28/2011 20:49:01 | 24.126 |
| 9/28/2010 02:43:00 | 24.5 | 5/28/2011 21:25:01 | 24.126 |
| 9/28/2010 03:18:00 | 24.5 | 5/28/2011 22:01:01 | 24.126 |
| 9/28/2010 03:53:00 | 24.5 | 5/28/2011 22:37:01 | 24.126 |
| 9/28/2010 04:28:00 | 24.5 | 5/28/2011 23:13:01 | 24.126 |
| 9/28/2010 05:03:00 | 24.5 | 5/28/2011 23:49:01 | 24.126 |
| 9/28/2010 05:38:00 | 24.5 | 5/29/2011 00:25:01 | 24.126 |
| 9/28/2010 06:13:00 | 24.5 | 5/29/2011 01:01:01 | 24.126 |
| 9/28/2010 06:48:00 | 24.5 | 5/29/2011 01:37:01 | 24.126 |
| 9/28/2010 07:23:00 | 24.5 | 5/29/2011 02:13:01 | 24.126 |
| 9/28/2010 07:58:00 | 24.5 | 5/29/2011 02:49:01 | 24.126 |
| 9/28/2010 08:33:00 | 24.5 | 5/29/2011 03:25:01 | 24.126 |
| 9/28/2010 09:08:00 | 24.5 | 5/29/2011 04:01:01 | 24.126 |
| 9/28/2010 09:43:00 | 24.5 | 5/29/2011 04:37:01 | 24.126 |
| 9/28/2010 10:18:00 | 24.5 | 5/29/2011 05:13:01 | 24.126 |
| 9/28/2010 10:53:00 | 24.5 | 5/29/2011 05:49:01 | 24.126 |
| 9/28/2010 11:28:00 | 24.5 | 5/29/2011 06:25:01 | 23.625 |
| 9/28/2010 12:03:00 | 24.5 | 5/29/2011 07:01:01 | 24.126 |
| 9/28/2010 12:38:00 | 24.5 | 5/29/2011 07:37:01 | 23.625 |
| 9/28/2010 13:13:00 | 24.5 | 5/29/2011 08:13:01 | 23.625 |
| 9/28/2010 13:48:00 | 24.5 | 5/29/2011 08:49:01 | 24.126 |
| 9/28/2010 14:23:00 | 24.5 | 5/29/2011 09:25:01 | 24.126 |
| 9/28/2010 14:58:00 | 24.5 | 5/29/2011 10:01:01 | 24.126 |
| 9/28/2010 15:33:00 | 24.5 | 5/29/2011 10:37:01 | 23.625 |
| 9/28/2010 16:08:00 | 24.5 | 5/29/2011 11:13:01 | 23.625 |
| 9/28/2010 16:43:00 | 24.5 | 5/29/2011 11:49:01 | 23.625 |
| 9/28/2010 17:18:00 | 24.5 | 5/29/2011 12:25:01 | 23.625 |
| 9/28/2010 17:53:00 | 24.5 | 5/29/2011 13:01:01 | 23.625 |
| 9/28/2010 18:28:00 | 24.5 | 5/29/2011 13:37:01 | 24.126 |
| 9/28/2010 19:03:00 | 24.5 | 5/29/2011 14:13:01 | 24.126 |
| 9/28/2010 19:38:00 | 24.5 | 5/29/2011 14:49:01 | 24.126 |
| 9/28/2010 20:13:00 | 25.0 | 5/29/2011 15:25:01 | 24.126 |
| 9/28/2010 20:48:00 | 25.0 | 5/29/2011 16:01:01 | 24.126 |
| 9/28/2010 21:23:00 | 25.0 | 5/29/2011 16:37:01 | 24.126 |
| 9/28/2010 21:58:00 | 25.0 | 5/29/2011 17:13:01 | 24.126 |
| 9/28/2010 22:33:00 | 25.0 | 5/29/2011 17:49:01 | 24.126 |
| 9/28/2010 23:08:00 | 25.0 | 5/29/2011 18:25:01 | 24.126 |
| 9/28/2010 23:43:00 | 25.0 | 5/29/2011 19:01:01 | 24.126 |
| 9/29/2010 00:18:00 | 24.5 | 5/29/2011 19:37:01 | 24.126 |

|                    |      |                    |        |
|--------------------|------|--------------------|--------|
| 9/29/2010 00:53:00 | 25.0 | 5/29/2011 20:13:01 | 24.126 |
| 9/29/2010 01:28:00 | 24.5 | 5/29/2011 20:49:01 | 24.126 |
| 9/29/2010 02:03:00 | 24.5 | 5/29/2011 21:25:01 | 24.126 |
| 9/29/2010 02:38:00 | 24.5 | 5/29/2011 22:01:01 | 24.126 |
| 9/29/2010 03:13:00 | 24.5 | 5/29/2011 22:37:01 | 24.126 |
| 9/29/2010 03:48:00 | 24.5 | 5/29/2011 23:13:01 | 24.126 |
| 9/29/2010 04:23:00 | 24.5 | 5/29/2011 23:49:01 | 24.126 |
| 9/29/2010 04:58:00 | 24.5 | 5/30/2011 00:25:01 | 24.126 |
| 9/29/2010 05:33:00 | 24.5 | 5/30/2011 01:01:01 | 24.126 |
| 9/29/2010 06:08:00 | 24.5 | 5/30/2011 01:37:01 | 24.126 |
| 9/29/2010 06:43:00 | 24.5 | 5/30/2011 02:13:01 | 24.126 |
| 9/29/2010 07:18:00 | 24.5 | 5/30/2011 02:49:01 | 24.126 |
| 9/29/2010 07:53:00 | 24.5 | 5/30/2011 03:25:01 | 24.126 |
| 9/29/2010 08:28:00 | 24.5 | 5/30/2011 04:01:01 | 24.126 |
| 9/29/2010 09:03:00 | 24.5 | 5/30/2011 04:37:01 | 24.126 |
| 9/29/2010 09:38:00 | 24.5 | 5/30/2011 05:13:01 | 24.126 |
| 9/29/2010 10:13:00 | 24.5 | 5/30/2011 05:49:01 | 24.126 |
| 9/29/2010 10:48:00 | 25.0 | 5/30/2011 06:25:01 | 24.126 |
| 9/29/2010 11:23:00 | 24.5 | 5/30/2011 07:01:01 | 24.126 |
| 9/29/2010 11:58:00 | 24.5 | 5/30/2011 07:37:01 | 24.126 |
| 9/29/2010 12:33:00 | 24.5 | 5/30/2011 08:13:01 | 24.126 |
| 9/29/2010 13:08:00 | 24.5 | 5/30/2011 08:49:01 | 24.126 |
| 9/29/2010 13:43:00 | 24.5 | 5/30/2011 09:25:01 | 24.126 |
| 9/29/2010 14:18:00 | 24.5 | 5/30/2011 10:01:01 | 24.126 |
| 9/29/2010 14:53:00 | 24.5 | 5/30/2011 10:37:01 | 24.126 |
| 9/29/2010 15:28:00 | 24.5 | 5/30/2011 11:13:01 | 24.126 |
| 9/29/2010 16:03:00 | 25.0 | 5/30/2011 11:49:01 | 24.126 |
| 9/29/2010 16:38:00 | 25.0 | 5/30/2011 12:25:01 | 24.126 |
| 9/29/2010 17:13:00 | 25.0 | 5/30/2011 13:01:01 | 24.126 |
| 9/29/2010 17:48:00 | 25.0 | 5/30/2011 13:37:01 | 24.126 |
| 9/29/2010 18:23:00 | 25.0 | 5/30/2011 14:13:01 | 24.126 |
| 9/29/2010 18:58:00 | 25.0 | 5/30/2011 14:49:01 | 24.126 |
| 9/29/2010 19:33:00 | 25.0 | 5/30/2011 15:25:01 | 24.126 |
| 9/29/2010 20:08:00 | 25.0 | 5/30/2011 16:01:01 | 24.126 |
| 9/29/2010 20:43:00 | 25.0 | 5/30/2011 16:37:01 | 24.126 |
| 9/29/2010 21:18:00 | 25.0 | 5/30/2011 17:13:01 | 24.126 |
| 9/29/2010 21:53:00 | 25.0 | 5/30/2011 17:49:01 | 24.126 |
| 9/29/2010 22:28:00 | 25.0 | 5/30/2011 18:25:01 | 24.126 |
| 9/29/2010 23:03:00 | 25.0 | 5/30/2011 19:01:01 | 24.126 |
| 9/29/2010 23:38:00 | 25.0 | 5/30/2011 19:37:01 | 24.126 |
| 9/30/2010 00:13:00 | 25.0 | 5/30/2011 20:13:01 | 24.126 |
| 9/30/2010 00:48:00 | 25.0 | 5/30/2011 20:49:01 | 24.126 |
| 9/30/2010 01:23:00 | 25.0 | 5/30/2011 21:25:01 | 24.126 |
| 9/30/2010 01:58:00 | 25.0 | 5/30/2011 22:01:01 | 24.126 |
| 9/30/2010 02:33:00 | 25.0 | 5/30/2011 22:37:01 | 24.126 |
| 9/30/2010 03:08:00 | 25.0 | 5/30/2011 23:13:01 | 24.126 |
| 9/30/2010 03:43:00 | 25.0 | 5/30/2011 23:49:01 | 24.126 |
| 9/30/2010 04:18:00 | 25.0 | 5/31/2011 00:25:01 | 24.126 |
| 9/30/2010 04:53:00 | 25.0 | 5/31/2011 01:01:01 | 24.126 |
| 9/30/2010 05:28:00 | 25.0 | 5/31/2011 01:37:01 | 24.126 |



|                    |      |                    |        |
|--------------------|------|--------------------|--------|
| 9/30/2010 06:03:00 | 25.0 | 5/31/2011 02:13:01 | 24.126 |
| 9/30/2010 06:38:00 | 25.0 | 5/31/2011 02:49:01 | 24.126 |
| 9/30/2010 07:13:00 | 25.0 | 5/31/2011 03:25:01 | 24.126 |
| 9/30/2010 07:48:00 | 25.0 | 5/31/2011 04:01:01 | 24.126 |
| 9/30/2010 08:23:00 | 24.5 | 5/31/2011 04:37:01 | 24.126 |
| 9/30/2010 08:58:00 | 24.5 | 5/31/2011 05:13:01 | 24.126 |
| 9/30/2010 09:33:00 | 24.5 | 5/31/2011 05:49:01 | 24.126 |
| 9/30/2010 10:08:00 | 24.5 | 5/31/2011 06:25:01 | 24.126 |
| 9/30/2010 10:43:00 | 24.5 | 5/31/2011 07:01:01 | 24.126 |
| 9/30/2010 11:18:00 | 24.5 | 5/31/2011 07:37:01 | 24.126 |
| 9/30/2010 11:53:00 | 24.5 | 5/31/2011 08:13:01 | 24.126 |
| 9/30/2010 12:28:00 | 24.5 | 5/31/2011 08:49:01 | 24.126 |
| 9/30/2010 13:03:00 | 25.0 | 5/31/2011 09:25:01 | 24.126 |
| 9/30/2010 13:38:00 | 25.0 | 5/31/2011 10:01:01 | 24.126 |
| 9/30/2010 14:13:00 | 25.0 | 5/31/2011 10:37:01 | 24.126 |
| 9/30/2010 14:48:00 | 25.0 | 5/31/2011 11:13:01 | 24.126 |
| 9/30/2010 15:23:00 | 25.0 | 5/31/2011 11:49:01 | 24.126 |
| 9/30/2010 15:58:00 | 25.0 | 5/31/2011 11:58:01 | 24.637 |
| 9/30/2010 16:33:00 | 25.0 | 5/31/2011 12:34:01 | 24.637 |
| 9/30/2010 17:08:00 | 25.0 | 5/31/2011 13:10:01 | 24.637 |
| 9/30/2010 17:43:00 | 25.0 | 5/31/2011 13:46:01 | 24.637 |
| 9/30/2010 18:18:00 | 25.0 | 5/31/2011 14:22:01 | 24.637 |
| 9/30/2010 18:53:00 | 25.0 | 5/31/2011 14:58:01 | 24.637 |
| 9/30/2010 19:28:00 | 25.0 | 5/31/2011 15:34:01 | 24.637 |
| 9/30/2010 20:03:00 | 25.0 | 5/31/2011 16:10:01 | 24.637 |
| 9/30/2010 20:38:00 | 25.0 | 5/31/2011 16:46:01 | 24.637 |
| 9/30/2010 21:13:00 | 25.0 | 5/31/2011 17:22:01 | 24.637 |
| 9/30/2010 21:48:00 | 25.0 | 5/31/2011 17:58:01 | 24.637 |
| 9/30/2010 22:23:00 | 25.0 | 5/31/2011 18:34:01 | 24.637 |
| 9/30/2010 22:58:00 | 25.0 | 5/31/2011 19:10:01 | 24.637 |
| 9/30/2010 23:33:00 | 25.0 | 5/31/2011 19:46:01 | 24.637 |
| 10/1/2010 00:08:00 | 25.0 | 5/31/2011 20:22:01 | 24.637 |
| 10/1/2010 00:43:00 | 25.0 | 5/31/2011 20:58:01 | 24.637 |
| 10/1/2010 01:18:00 | 25.0 | 5/31/2011 21:34:01 | 24.637 |
| 10/1/2010 01:53:00 | 25.0 | 5/31/2011 22:10:01 | 24.637 |
| 10/1/2010 02:28:00 | 25.0 | 5/31/2011 22:46:01 | 24.637 |
| 10/1/2010 03:03:00 | 25.0 | 5/31/2011 23:22:01 | 24.637 |
| 10/1/2010 03:38:00 | 25.0 | 5/31/2011 23:58:01 | 24.637 |
| 10/1/2010 04:13:00 | 25.0 | 6/1/2011 00:34:01  | 24.637 |
| 10/1/2010 04:48:00 | 25.0 | 6/1/2011 01:10:01  | 24.637 |
| 10/1/2010 05:23:00 | 25.0 | 6/1/2011 01:46:01  | 24.637 |
| 10/1/2010 05:58:00 | 25.0 | 6/1/2011 02:22:01  | 24.637 |
| 10/1/2010 06:33:00 | 25.0 | 6/1/2011 02:58:01  | 24.637 |
| 10/1/2010 07:08:00 | 25.0 | 6/1/2011 03:34:01  | 24.637 |
| 10/1/2010 07:43:00 | 24.5 | 6/1/2011 04:10:01  | 24.637 |
| 10/1/2010 08:18:00 | 24.5 | 6/1/2011 04:46:01  | 24.637 |
| 10/1/2010 08:53:00 | 24.5 | 6/1/2011 05:22:01  | 24.637 |
| 10/1/2010 09:28:00 | 24.5 | 6/1/2011 05:58:01  | 24.637 |
| 10/1/2010 10:03:00 | 24.5 | 6/1/2011 06:34:01  | 24.637 |
| 10/1/2010 10:38:00 | 24.5 | 6/1/2011 07:10:01  | 24.637 |

|                    |      |                   |        |
|--------------------|------|-------------------|--------|
| 10/1/2010 11:13:00 | 24.5 | 6/1/2011 07:46:01 | 24.637 |
| 10/1/2010 11:48:00 | 24.5 | 6/1/2011 08:22:01 | 24.637 |
| 10/1/2010 12:23:00 | 24.5 | 6/1/2011 08:58:01 | 24.637 |
| 10/1/2010 12:58:00 | 24.5 | 6/1/2011 09:34:01 | 24.637 |
| 10/1/2010 13:33:00 | 25.0 | 6/1/2011 10:10:01 | 24.637 |
| 10/1/2010 14:08:00 | 25.0 | 6/1/2011 10:46:01 | 24.637 |
| 10/1/2010 14:43:00 | 25.0 | 6/1/2011 11:22:01 | 24.637 |
| 10/1/2010 15:18:00 | 25.0 | 6/1/2011 11:58:01 | 24.137 |
| 10/1/2010 15:53:00 | 25.0 | 6/1/2011 12:34:01 | 24.137 |
| 10/1/2010 16:28:00 | 25.0 | 6/1/2011 13:10:01 | 24.137 |
| 10/1/2010 17:03:00 | 25.0 | 6/1/2011 13:46:01 | 24.137 |
| 10/1/2010 17:38:00 | 25.0 | 6/1/2011 14:22:01 | 24.137 |
| 10/1/2010 18:13:00 | 25.0 | 6/1/2011 14:58:01 | 24.137 |
| 10/1/2010 18:48:00 | 25.0 | 6/1/2011 15:34:01 | 24.137 |
| 10/1/2010 19:23:00 | 25.0 | 6/1/2011 16:10:01 | 24.137 |
| 10/1/2010 19:58:00 | 25.0 | 6/1/2011 16:46:01 | 24.137 |
| 10/1/2010 20:33:00 | 25.0 | 6/1/2011 17:22:01 | 24.137 |
| 10/1/2010 21:08:00 | 25.0 | 6/1/2011 17:58:01 | 24.137 |
| 10/1/2010 21:43:00 | 25.0 | 6/1/2011 18:34:01 | 24.637 |
| 10/1/2010 22:18:00 | 25.0 | 6/1/2011 19:10:01 | 24.637 |
| 10/1/2010 22:53:00 | 25.0 | 6/1/2011 19:46:01 | 24.637 |
| 10/1/2010 23:28:00 | 25.0 | 6/1/2011 20:22:01 | 24.637 |
| 10/2/2010 00:03:00 | 25.0 | 6/1/2011 20:58:01 | 24.637 |
| 10/2/2010 00:38:00 | 25.0 | 6/1/2011 21:34:01 | 24.637 |
| 10/2/2010 01:13:00 | 25.0 | 6/1/2011 22:10:01 | 24.637 |
| 10/2/2010 01:48:00 | 25.0 | 6/1/2011 22:46:01 | 24.637 |
| 10/2/2010 02:23:00 | 25.0 | 6/1/2011 23:22:01 | 24.637 |
| 10/2/2010 02:58:00 | 25.0 | 6/1/2011 23:58:01 | 24.637 |
| 10/2/2010 03:33:00 | 25.0 | 6/2/2011 00:34:01 | 24.637 |
| 10/2/2010 04:08:00 | 25.0 | 6/2/2011 01:10:01 | 24.637 |
| 10/2/2010 04:43:00 | 25.0 | 6/2/2011 01:46:01 | 24.637 |
| 10/2/2010 05:18:00 | 25.0 | 6/2/2011 02:22:01 | 24.637 |
| 10/2/2010 05:53:00 | 25.0 | 6/2/2011 02:58:01 | 24.637 |
| 10/2/2010 06:28:00 | 25.0 | 6/2/2011 03:34:01 | 24.637 |
| 10/2/2010 07:03:00 | 25.0 | 6/2/2011 04:10:01 | 24.637 |
| 10/2/2010 07:38:00 | 25.0 | 6/2/2011 04:46:01 | 24.637 |
| 10/2/2010 08:13:00 | 25.0 | 6/2/2011 05:22:01 | 24.637 |
| 10/2/2010 08:48:00 | 25.0 | 6/2/2011 05:58:01 | 24.137 |
| 10/2/2010 09:23:00 | 25.0 | 6/2/2011 06:34:01 | 24.137 |
| 10/2/2010 09:58:00 | 25.0 | 6/2/2011 07:10:01 | 24.637 |
| 10/2/2010 10:33:00 | 25.0 | 6/2/2011 07:46:01 | 24.637 |
| 10/2/2010 11:08:00 | 25.0 | 6/2/2011 08:22:01 | 24.137 |
| 10/2/2010 11:43:00 | 25.0 | 6/2/2011 08:58:01 | 24.137 |
| 10/2/2010 12:18:00 | 25.0 | 6/2/2011 09:34:01 | 24.137 |
| 10/2/2010 12:53:00 | 25.0 | 6/2/2011 10:10:01 | 24.137 |
| 10/2/2010 13:28:00 | 25.0 | 6/2/2011 10:46:01 | 24.137 |
| 10/2/2010 14:03:00 | 25.0 | 6/2/2011 11:22:01 | 24.137 |
| 10/2/2010 14:38:00 | 25.0 | 6/2/2011 11:58:01 | 24.137 |
| 10/2/2010 15:13:00 | 25.0 | 6/2/2011 12:34:01 | 24.137 |
| 10/2/2010 15:48:00 | 25.0 | 6/2/2011 13:10:01 | 24.137 |

|                    |      |                   |        |
|--------------------|------|-------------------|--------|
| 10/2/2010 16:23:00 | 25.0 | 6/2/2011 13:46:01 | 24.137 |
| 10/2/2010 16:58:00 | 25.0 | 6/2/2011 14:22:01 | 24.137 |
| 10/2/2010 17:33:00 | 25.0 | 6/2/2011 14:58:01 | 24.137 |
| 10/2/2010 18:08:00 | 25.0 | 6/2/2011 15:34:01 | 24.137 |
| 10/2/2010 18:43:00 | 25.0 | 6/2/2011 16:10:01 | 24.137 |
| 10/2/2010 19:18:00 | 25.0 | 6/2/2011 16:46:01 | 24.137 |
| 10/2/2010 19:53:00 | 25.0 | 6/2/2011 17:22:01 | 24.137 |
| 10/2/2010 20:28:00 | 25.5 | 6/2/2011 17:58:01 | 24.137 |
| 10/2/2010 21:03:00 | 25.5 | 6/2/2011 18:34:01 | 24.137 |
| 10/2/2010 21:38:00 | 25.5 | 6/2/2011 19:10:01 | 24.137 |
| 10/2/2010 22:13:00 | 25.5 | 6/2/2011 19:46:01 | 24.137 |
| 10/2/2010 22:48:00 | 25.5 | 6/2/2011 20:22:01 | 24.137 |
| 10/2/2010 23:23:00 | 25.5 | 6/2/2011 20:58:01 | 24.137 |
| 10/2/2010 23:58:00 | 25.5 | 6/2/2011 21:34:01 | 24.137 |
| 10/3/2010 00:33:00 | 25.5 | 6/2/2011 22:10:01 | 24.137 |
| 10/3/2010 01:08:00 | 25.5 | 6/2/2011 22:46:01 | 24.137 |
| 10/3/2010 01:43:00 | 25.5 | 6/2/2011 23:22:01 | 24.137 |
| 10/3/2010 02:18:00 | 25.5 | 6/2/2011 23:58:01 | 24.137 |
| 10/3/2010 02:53:00 | 25.5 | 6/3/2011 00:34:01 | 24.137 |
| 10/3/2010 03:28:00 | 25.5 | 6/3/2011 01:10:01 | 24.137 |
| 10/3/2010 04:03:00 | 25.5 | 6/3/2011 01:46:01 | 24.137 |
| 10/3/2010 04:38:00 | 25.0 | 6/3/2011 02:22:01 | 24.137 |
| 10/3/2010 05:13:00 | 25.0 | 6/3/2011 02:58:01 | 24.137 |
| 10/3/2010 05:48:00 | 25.0 | 6/3/2011 03:34:01 | 24.137 |
| 10/3/2010 06:23:00 | 25.0 | 6/3/2011 04:10:01 | 24.137 |
| 10/3/2010 06:58:00 | 25.0 | 6/3/2011 04:46:01 | 24.137 |
| 10/3/2010 07:33:00 | 25.0 | 6/3/2011 05:22:01 | 24.137 |
| 10/3/2010 08:08:00 | 25.0 | 6/3/2011 05:58:01 | 24.137 |
| 10/3/2010 08:43:00 | 25.0 | 6/3/2011 06:34:01 | 24.137 |
| 10/3/2010 09:18:00 | 25.0 | 6/3/2011 07:10:01 | 24.137 |
| 10/3/2010 09:53:00 | 25.0 | 6/3/2011 07:46:01 | 24.137 |
| 10/3/2010 10:28:00 | 25.0 | 6/3/2011 08:22:01 | 24.137 |
| 10/3/2010 11:03:00 | 25.0 | 6/3/2011 08:58:01 | 24.637 |
| 10/3/2010 11:38:00 | 25.0 | 6/3/2011 09:34:01 | 24.637 |
| 10/3/2010 12:13:00 | 25.0 | 6/3/2011 10:10:01 | 24.137 |
| 10/3/2010 12:48:00 | 25.0 | 6/3/2011 10:46:01 | 24.137 |
| 10/3/2010 13:23:00 | 25.0 | 6/3/2011 11:22:01 | 24.137 |
| 10/3/2010 13:58:00 | 25.0 | 6/3/2011 11:58:01 | 24.137 |
| 10/3/2010 14:33:00 | 25.0 | 6/3/2011 12:34:01 | 24.637 |
| 10/3/2010 15:08:00 | 25.0 | 6/3/2011 13:10:01 | 24.637 |
| 10/3/2010 15:43:00 | 25.5 | 6/3/2011 13:46:01 | 24.637 |
| 10/3/2010 16:18:00 | 25.5 | 6/3/2011 14:22:01 | 24.137 |
| 10/3/2010 16:53:00 | 25.5 | 6/3/2011 14:58:01 | 24.137 |
| 10/3/2010 17:28:00 | 25.5 | 6/3/2011 15:34:01 | 24.137 |
| 10/3/2010 18:03:00 | 25.5 | 6/3/2011 16:10:01 | 24.137 |
| 10/3/2010 18:38:00 | 25.5 | 6/3/2011 16:46:01 | 24.137 |
| 10/3/2010 19:13:00 | 25.5 | 6/3/2011 17:22:01 | 24.137 |
| 10/3/2010 19:48:00 | 25.5 | 6/3/2011 17:58:01 | 24.137 |
| 10/3/2010 20:23:00 | 25.5 | 6/3/2011 18:34:01 | 24.137 |
| 10/3/2010 20:58:00 | 25.5 | 6/3/2011 19:10:01 | 24.137 |

|                    |      |                   |        |
|--------------------|------|-------------------|--------|
| 10/3/2010 21:33:00 | 25.5 | 6/3/2011 19:46:01 | 24.137 |
| 10/3/2010 22:08:00 | 25.5 | 6/3/2011 20:22:01 | 24.137 |
| 10/3/2010 22:43:00 | 25.5 | 6/3/2011 20:58:01 | 24.137 |
| 10/3/2010 23:18:00 | 25.5 | 6/3/2011 21:34:01 | 24.137 |
| 10/3/2010 23:53:00 | 25.5 | 6/3/2011 22:10:01 | 24.137 |
| 10/4/2010 00:28:00 | 25.5 | 6/3/2011 22:46:01 | 24.137 |
| 10/4/2010 01:03:00 | 25.5 | 6/3/2011 23:22:01 | 24.137 |
| 10/4/2010 01:38:00 | 25.5 | 6/3/2011 23:58:01 | 24.137 |
| 10/4/2010 02:13:00 | 25.5 | 6/4/2011 00:34:01 | 24.137 |
| 10/4/2010 02:48:00 | 25.5 | 6/4/2011 01:10:01 | 24.137 |
| 10/4/2010 03:23:00 | 25.5 | 6/4/2011 01:46:01 | 24.137 |
| 10/4/2010 03:58:00 | 25.5 | 6/4/2011 02:22:01 | 24.137 |
| 10/4/2010 04:33:00 | 25.5 | 6/4/2011 02:58:01 | 24.137 |
| 10/4/2010 05:08:00 | 25.5 | 6/4/2011 03:34:01 | 24.137 |
| 10/4/2010 05:43:00 | 25.5 | 6/4/2011 04:10:01 | 24.137 |
| 10/4/2010 06:18:00 | 25.5 | 6/4/2011 04:46:01 | 24.137 |
| 10/4/2010 06:53:00 | 25.0 | 6/4/2011 05:22:01 | 24.137 |
| 10/4/2010 07:28:00 | 25.0 | 6/4/2011 05:58:01 | 24.137 |
| 10/4/2010 08:03:00 | 25.0 | 6/4/2011 06:34:01 | 24.137 |
| 10/4/2010 08:38:00 | 25.0 | 6/4/2011 07:10:01 | 24.137 |
| 10/4/2010 09:13:00 | 25.0 | 6/4/2011 07:46:01 | 24.137 |
| 10/4/2010 09:48:00 | 25.0 | 6/4/2011 08:22:01 | 24.137 |
| 10/4/2010 10:23:00 | 25.0 | 6/4/2011 08:58:01 | 24.137 |
| 10/4/2010 10:58:00 | 25.0 | 6/4/2011 09:34:01 | 24.137 |
| 10/4/2010 11:33:00 | 25.0 | 6/4/2011 10:10:01 | 24.137 |
| 10/4/2010 12:08:00 | 25.0 | 6/4/2011 10:46:01 | 24.137 |
| 10/4/2010 12:43:00 | 25.0 | 6/4/2011 11:22:01 | 24.137 |
| 10/4/2010 13:18:00 | 25.0 | 6/4/2011 11:58:01 | 24.137 |
| 10/4/2010 13:53:00 | 25.0 | 6/4/2011 12:34:01 | 24.137 |
| 10/4/2010 14:28:00 | 25.5 | 6/4/2011 13:10:01 | 24.137 |
| 10/4/2010 15:03:00 | 25.5 | 6/4/2011 13:46:01 | 24.137 |
| 10/4/2010 15:38:00 | 25.5 | 6/4/2011 14:22:01 | 24.137 |
| 10/4/2010 16:13:00 | 25.5 | 6/4/2011 14:58:01 | 24.137 |
| 10/4/2010 16:48:00 | 25.5 | 6/4/2011 15:34:01 | 24.137 |
| 10/4/2010 17:23:00 | 25.5 | 6/4/2011 16:10:01 | 24.137 |
| 10/4/2010 17:58:00 | 25.5 | 6/4/2011 16:46:01 | 24.137 |
| 10/4/2010 18:33:00 | 25.5 | 6/4/2011 17:22:01 | 24.137 |
| 10/4/2010 19:08:00 | 25.5 | 6/4/2011 17:58:01 | 24.137 |
| 10/4/2010 19:43:00 | 25.5 | 6/4/2011 18:34:01 | 24.137 |
| 10/4/2010 20:18:00 | 25.5 | 6/4/2011 19:10:01 | 24.137 |
| 10/4/2010 20:53:00 | 25.5 | 6/4/2011 19:46:01 | 24.137 |
| 10/4/2010 21:28:00 | 25.5 | 6/4/2011 20:22:01 | 24.137 |
| 10/4/2010 22:03:00 | 25.5 | 6/4/2011 20:58:01 | 24.137 |
| 10/4/2010 22:38:00 | 25.5 | 6/4/2011 21:34:01 | 24.137 |
| 10/4/2010 23:13:00 | 25.5 | 6/4/2011 22:10:01 | 24.137 |
| 10/4/2010 23:48:00 | 25.5 | 6/4/2011 22:46:01 | 24.137 |
| 10/5/2010 00:23:00 | 25.5 | 6/4/2011 23:22:01 | 24.137 |
| 10/5/2010 00:58:00 | 25.5 | 6/4/2011 23:58:01 | 24.137 |
| 10/5/2010 01:33:00 | 25.5 | 6/5/2011 00:34:01 | 24.137 |
| 10/5/2010 02:08:00 | 25.5 | 6/5/2011 01:10:01 | 24.137 |

|                    |      |                   |        |
|--------------------|------|-------------------|--------|
| 10/5/2010 02:43:00 | 25.5 | 6/5/2011 01:46:01 | 24.137 |
| 10/5/2010 03:18:00 | 25.5 | 6/5/2011 02:22:01 | 24.137 |
| 10/5/2010 03:53:00 | 25.5 | 6/5/2011 02:58:01 | 24.137 |
| 10/5/2010 04:28:00 | 25.5 | 6/5/2011 03:34:01 | 24.137 |
| 10/5/2010 05:03:00 | 25.5 | 6/5/2011 04:10:01 | 24.137 |
| 10/5/2010 05:38:00 | 25.5 | 6/5/2011 04:46:01 | 24.137 |
| 10/5/2010 06:13:00 | 25.5 | 6/5/2011 05:22:01 | 24.137 |
| 10/5/2010 06:48:00 | 25.5 | 6/5/2011 05:58:01 | 24.137 |
| 10/5/2010 07:23:00 | 25.5 | 6/5/2011 06:34:01 | 24.137 |
| 10/5/2010 07:58:00 | 25.5 | 6/5/2011 07:10:01 | 24.137 |
| 10/5/2010 08:33:00 | 25.5 | 6/5/2011 07:46:01 | 24.137 |
| 10/5/2010 09:08:00 | 25.5 | 6/5/2011 08:22:01 | 24.137 |
| 10/5/2010 09:43:00 | 25.5 | 6/5/2011 08:58:01 | 24.137 |
| 10/5/2010 10:18:00 | 25.5 | 6/5/2011 09:34:01 | 24.137 |
| 10/5/2010 10:53:00 | 25.5 | 6/5/2011 10:10:01 | 24.137 |
| 10/5/2010 11:28:00 | 25.5 | 6/5/2011 10:46:01 | 24.137 |
| 10/5/2010 12:03:00 | 25.5 | 6/5/2011 11:22:01 | 23.637 |
| 10/5/2010 12:38:00 | 25.5 | 6/5/2011 11:58:01 | 23.637 |
| 10/5/2010 13:13:00 | 25.5 | 6/5/2011 12:34:01 | 23.637 |
| 10/5/2010 13:48:00 | 25.5 | 6/5/2011 13:10:01 | 23.637 |
| 10/5/2010 14:23:00 | 25.5 | 6/5/2011 13:46:01 | 23.637 |
| 10/5/2010 14:58:00 | 25.5 | 6/5/2011 14:22:01 | 23.637 |
| 10/5/2010 15:33:00 | 25.5 | 6/5/2011 14:58:01 | 23.637 |
| 10/5/2010 16:08:00 | 25.5 | 6/5/2011 15:34:01 | 23.637 |
| 10/5/2010 16:43:00 | 26.0 | 6/5/2011 16:10:01 | 23.637 |
| 10/5/2010 17:18:00 | 26.0 | 6/5/2011 16:46:01 | 23.637 |
| 10/5/2010 17:53:00 | 26.0 | 6/5/2011 17:22:01 | 23.637 |
| 10/5/2010 18:28:00 | 26.0 | 6/5/2011 17:58:01 | 23.637 |
| 10/5/2010 19:03:00 | 26.0 | 6/5/2011 18:34:01 | 23.637 |
| 10/5/2010 19:38:00 | 26.0 | 6/5/2011 19:10:01 | 24.137 |
| 10/5/2010 20:13:00 | 26.0 | 6/5/2011 19:46:01 | 24.137 |
| 10/5/2010 20:48:00 | 26.0 | 6/5/2011 20:22:01 | 24.137 |
| 10/5/2010 21:23:00 | 26.0 | 6/5/2011 20:58:01 | 24.137 |
| 10/5/2010 21:58:00 | 26.0 | 6/5/2011 21:34:01 | 24.137 |
| 10/5/2010 22:33:00 | 26.0 | 6/5/2011 22:10:01 | 24.137 |
| 10/5/2010 23:08:00 | 26.0 | 6/5/2011 22:46:01 | 24.137 |
| 10/5/2010 23:43:00 | 26.0 | 6/5/2011 23:22:01 | 24.137 |
| 10/6/2010 00:18:00 | 26.0 | 6/5/2011 23:58:01 | 24.137 |
| 10/6/2010 00:53:00 | 26.0 | 6/6/2011 00:34:01 | 24.137 |
| 10/6/2010 01:28:00 | 26.0 | 6/6/2011 01:10:01 | 24.137 |
| 10/6/2010 02:03:00 | 26.0 | 6/6/2011 01:46:01 | 24.137 |
| 10/6/2010 02:38:00 | 26.0 | 6/6/2011 02:22:01 | 24.137 |
| 10/6/2010 03:13:00 | 26.0 | 6/6/2011 02:58:01 | 24.137 |
| 10/6/2010 03:48:00 | 26.0 | 6/6/2011 03:34:01 | 24.137 |
| 10/6/2010 04:23:00 | 26.0 | 6/6/2011 04:10:01 | 24.137 |
| 10/6/2010 04:58:00 | 26.0 | 6/6/2011 04:46:01 | 24.137 |
| 10/6/2010 05:33:00 | 26.0 | 6/6/2011 05:22:01 | 24.137 |
| 10/6/2010 06:08:00 | 25.5 | 6/6/2011 05:58:01 | 24.137 |
| 10/6/2010 06:43:00 | 25.5 | 6/6/2011 06:34:01 | 24.137 |
| 10/6/2010 07:18:00 | 25.5 | 6/6/2011 07:10:01 | 24.137 |

|                    |      |                   |        |
|--------------------|------|-------------------|--------|
| 10/6/2010 07:53:00 | 25.5 | 6/6/2011 07:46:01 | 24.137 |
| 10/6/2010 08:28:00 | 25.5 | 6/6/2011 08:22:01 | 24.137 |
| 10/6/2010 09:03:00 | 25.5 | 6/6/2011 08:58:01 | 24.137 |
| 10/6/2010 09:38:00 | 25.5 | 6/6/2011 09:34:01 | 24.137 |
| 10/6/2010 10:13:00 | 25.5 | 6/6/2011 10:10:01 | 24.137 |
| 10/6/2010 10:48:00 | 25.5 | 6/6/2011 10:46:01 | 24.137 |
| 10/6/2010 11:23:00 | 25.5 | 6/6/2011 11:22:01 | 24.137 |
| 10/6/2010 11:58:00 | 25.5 | 6/6/2011 11:58:01 | 24.137 |
| 10/6/2010 12:33:00 | 25.5 | 6/6/2011 12:34:01 | 24.137 |
| 10/6/2010 13:08:00 | 25.5 | 6/6/2011 13:10:01 | 24.137 |
| 10/6/2010 13:43:00 | 25.5 | 6/6/2011 13:46:01 | 24.137 |
| 10/6/2010 14:18:00 | 26.0 | 6/6/2011 14:22:01 | 24.137 |
| 10/6/2010 14:53:00 | 26.0 | 6/6/2011 14:58:01 | 24.137 |
| 10/6/2010 15:28:00 | 26.0 | 6/6/2011 15:34:01 | 23.637 |
| 10/6/2010 16:03:00 | 26.0 | 6/6/2011 16:10:01 | 23.637 |
| 10/6/2010 16:38:00 | 26.0 | 6/6/2011 16:46:01 | 23.637 |
| 10/6/2010 17:13:00 | 26.0 | 6/6/2011 17:22:01 | 23.637 |
| 10/6/2010 17:48:00 | 26.0 | 6/6/2011 17:58:01 | 24.137 |
| 10/6/2010 18:23:00 | 26.0 | 6/6/2011 18:34:01 | 24.137 |
| 10/6/2010 18:58:00 | 26.0 | 6/6/2011 19:10:01 | 24.137 |
| 10/6/2010 19:33:00 | 26.0 | 6/6/2011 19:46:01 | 24.137 |
| 10/6/2010 20:08:00 | 26.0 | 6/6/2011 20:22:01 | 24.137 |
| 10/6/2010 20:43:00 | 26.0 | 6/6/2011 20:58:01 | 24.137 |
| 10/6/2010 21:18:00 | 26.0 | 6/6/2011 21:34:01 | 24.137 |
| 10/6/2010 21:53:00 | 26.0 | 6/6/2011 22:10:01 | 24.137 |
| 10/6/2010 22:28:00 | 26.0 | 6/6/2011 22:46:01 | 24.137 |
| 10/6/2010 23:03:00 | 26.0 | 6/6/2011 23:22:01 | 24.137 |
| 10/6/2010 23:38:00 | 26.0 | 6/6/2011 23:58:01 | 24.137 |
| 10/7/2010 00:13:00 | 26.0 | 6/7/2011 00:34:01 | 24.137 |
| 10/7/2010 00:48:00 | 26.0 | 6/7/2011 01:10:01 | 24.137 |
| 10/7/2010 01:23:00 | 26.0 | 6/7/2011 01:46:01 | 24.137 |
| 10/7/2010 01:58:00 | 26.0 | 6/7/2011 02:22:01 | 24.137 |
| 10/7/2010 02:33:00 | 26.0 | 6/7/2011 02:58:01 | 24.137 |
| 10/7/2010 03:08:00 | 26.0 | 6/7/2011 03:34:01 | 24.137 |
| 10/7/2010 03:43:00 | 26.0 | 6/7/2011 04:10:01 | 24.137 |
| 10/7/2010 04:18:00 | 26.0 | 6/7/2011 04:46:01 | 24.137 |
| 10/7/2010 04:53:00 | 26.0 | 6/7/2011 05:22:01 | 24.137 |
| 10/7/2010 05:28:00 | 26.0 | 6/7/2011 05:58:01 | 24.137 |
| 10/7/2010 06:03:00 | 26.0 | 6/7/2011 06:34:01 | 24.137 |
| 10/7/2010 06:38:00 | 26.0 | 6/7/2011 07:10:01 | 24.137 |
| 10/7/2010 07:13:00 | 26.0 | 6/7/2011 07:46:01 | 24.137 |
| 10/7/2010 07:48:00 | 26.0 | 6/7/2011 08:22:01 | 24.137 |
| 10/7/2010 08:23:00 | 26.0 | 6/7/2011 08:58:01 | 24.137 |
| 10/7/2010 08:58:00 | 26.0 | 6/7/2011 09:34:01 | 24.137 |
| 10/7/2010 09:33:00 | 26.0 | 6/7/2011 10:10:01 | 24.137 |
| 10/7/2010 10:08:00 | 26.0 | 6/7/2011 10:46:01 | 24.137 |
| 10/7/2010 10:43:00 | 26.0 | 6/7/2011 11:22:01 | 24.137 |
| 10/7/2010 11:18:00 | 26.0 | 6/7/2011 11:58:01 | 24.137 |
| 10/7/2010 11:53:00 | 26.0 | 6/7/2011 12:34:01 | 24.137 |
| 10/7/2010 12:28:00 | 26.0 | 6/7/2011 13:10:01 | 24.137 |

|                    |      |                   |        |
|--------------------|------|-------------------|--------|
| 10/7/2010 13:03:00 | 26.0 | 6/7/2011 13:46:01 | 24.137 |
| 10/7/2010 13:38:00 | 26.0 | 6/7/2011 14:22:01 | 24.137 |
| 10/7/2010 14:13:00 | 26.0 | 6/7/2011 14:58:01 | 24.137 |
| 10/7/2010 14:48:00 | 26.0 | 6/7/2011 15:34:01 | 24.137 |
| 10/7/2010 15:23:00 | 26.0 | 6/7/2011 16:10:01 | 24.137 |
| 10/7/2010 15:58:00 | 26.0 | 6/7/2011 16:46:01 | 24.137 |
| 10/7/2010 16:33:00 | 26.0 | 6/7/2011 17:22:01 | 24.137 |
| 10/7/2010 17:08:00 | 26.0 | 6/7/2011 17:58:01 | 24.137 |
| 10/7/2010 17:43:00 | 26.5 | 6/7/2011 18:34:01 | 24.137 |
| 10/7/2010 18:18:00 | 26.5 | 6/7/2011 19:10:01 | 24.137 |
| 10/7/2010 18:53:00 | 26.5 | 6/7/2011 19:46:01 | 24.137 |
| 10/7/2010 19:28:00 | 26.5 | 6/7/2011 20:22:01 | 24.137 |
| 10/7/2010 20:03:00 | 26.5 | 6/7/2011 20:58:01 | 24.137 |
| 10/7/2010 20:38:00 | 26.5 | 6/7/2011 21:34:01 | 24.137 |
| 10/7/2010 21:13:00 | 26.5 | 6/7/2011 22:10:01 | 24.137 |
| 10/7/2010 21:48:00 | 26.5 | 6/7/2011 22:46:01 | 24.137 |
| 10/7/2010 22:23:00 | 26.5 | 6/7/2011 23:22:01 | 24.137 |
| 10/7/2010 22:58:00 | 26.5 | 6/7/2011 23:58:01 | 24.137 |
| 10/7/2010 23:33:00 | 26.5 | 6/8/2011 00:34:01 | 24.137 |
| 10/8/2010 00:08:00 | 26.5 | 6/8/2011 01:10:01 | 24.137 |
| 10/8/2010 00:43:00 | 26.5 | 6/8/2011 01:46:01 | 24.137 |
| 10/8/2010 01:18:00 | 26.5 | 6/8/2011 02:22:01 | 24.137 |
| 10/8/2010 01:53:00 | 26.5 | 6/8/2011 02:58:01 | 24.137 |
| 10/8/2010 02:28:00 | 26.5 | 6/8/2011 03:34:01 | 24.137 |
| 10/8/2010 03:03:00 | 26.5 | 6/8/2011 04:10:01 | 24.137 |
| 10/8/2010 03:38:00 | 26.5 | 6/8/2011 04:46:01 | 24.137 |
| 10/8/2010 04:13:00 | 26.0 | 6/8/2011 05:22:01 | 24.137 |
| 10/8/2010 04:48:00 | 26.0 | 6/8/2011 05:58:01 | 24.137 |
| 10/8/2010 05:23:00 | 26.0 | 6/8/2011 06:34:01 | 24.137 |
| 10/8/2010 05:58:00 | 26.0 | 6/8/2011 07:10:01 | 24.137 |
| 10/8/2010 06:33:00 | 26.0 | 6/8/2011 07:46:01 | 24.137 |
| 10/8/2010 07:08:00 | 26.0 | 6/8/2011 08:22:01 | 24.137 |
| 10/8/2010 07:43:00 | 26.0 | 6/8/2011 08:58:01 | 24.137 |
| 10/8/2010 08:18:00 | 26.0 | 6/8/2011 09:34:01 | 24.137 |
| 10/8/2010 08:53:00 | 26.0 | 6/8/2011 10:10:01 | 24.137 |
| 10/8/2010 09:28:00 | 26.0 | 6/8/2011 10:46:01 | 24.137 |
| 10/8/2010 10:03:00 | 26.0 | 6/8/2011 11:22:01 | 24.137 |
| 10/8/2010 10:38:00 | 26.0 | 6/8/2011 11:58:01 | 24.137 |
| 10/8/2010 11:13:00 | 26.0 | 6/8/2011 12:34:01 | 24.137 |
| 10/8/2010 11:48:00 | 26.0 | 6/8/2011 13:10:01 | 23.637 |
| 10/8/2010 12:23:00 | 26.0 | 6/8/2011 13:46:01 | 23.637 |
| 10/8/2010 12:58:00 | 26.0 | 6/8/2011 14:22:01 | 23.637 |
| 10/8/2010 13:33:00 | 26.0 | 6/8/2011 14:58:01 | 23.637 |
| 10/8/2010 14:08:00 | 26.0 | 6/8/2011 15:34:01 | 23.637 |
| 10/8/2010 14:43:00 | 26.0 | 6/8/2011 16:10:01 | 23.637 |
| 10/8/2010 15:18:00 | 26.0 | 6/8/2011 16:46:01 | 23.637 |
| 10/8/2010 15:53:00 | 26.0 | 6/8/2011 17:22:01 | 23.637 |
| 10/8/2010 16:28:00 | 26.5 | 6/8/2011 17:58:01 | 23.637 |
| 10/8/2010 17:03:00 | 26.5 | 6/8/2011 18:34:01 | 23.637 |
| 10/8/2010 17:38:00 | 26.5 | 6/8/2011 19:10:01 | 23.637 |

|                    |      |                    |        |
|--------------------|------|--------------------|--------|
| 10/8/2010 18:13:00 | 26.5 | 6/8/2011 19:46:01  | 23.637 |
| 10/8/2010 18:48:00 | 26.5 | 6/8/2011 20:22:01  | 24.137 |
| 10/8/2010 19:23:00 | 26.5 | 6/8/2011 20:58:01  | 24.137 |
| 10/8/2010 19:58:00 | 26.5 | 6/8/2011 21:34:01  | 24.137 |
| 10/8/2010 20:33:00 | 26.5 | 6/8/2011 22:10:01  | 24.137 |
| 10/8/2010 21:08:00 | 26.5 | 6/8/2011 22:46:01  | 24.137 |
| 10/8/2010 21:43:00 | 26.5 | 6/8/2011 23:22:01  | 24.137 |
| 10/8/2010 22:18:00 | 26.5 | 6/8/2011 23:58:01  | 24.137 |
| 10/8/2010 22:53:00 | 26.5 | 6/9/2011 00:34:01  | 24.137 |
| 10/8/2010 23:28:00 | 26.5 | 6/9/2011 01:10:01  | 24.137 |
| 10/9/2010 00:03:00 | 26.5 | 6/9/2011 01:46:01  | 24.137 |
| 10/9/2010 00:38:00 | 26.5 | 6/9/2011 02:22:01  | 24.137 |
| 10/9/2010 01:13:00 | 26.5 | 6/9/2011 02:58:01  | 24.137 |
| 10/9/2010 01:48:00 | 26.5 | 6/9/2011 03:34:01  | 24.137 |
| 10/9/2010 02:23:00 | 26.0 | 6/9/2011 04:10:01  | 24.137 |
| 10/9/2010 02:58:00 | 26.0 | 6/9/2011 04:46:01  | 24.137 |
| 10/9/2010 03:33:00 | 26.0 | 6/9/2011 05:22:01  | 24.137 |
| 10/9/2010 04:08:00 | 26.0 | 6/9/2011 05:58:01  | 23.637 |
| 10/9/2010 04:43:00 | 26.0 | 6/9/2011 06:34:01  | 23.637 |
| 10/9/2010 05:18:00 | 26.0 | 6/9/2011 07:10:01  | 23.637 |
| 10/9/2010 05:53:00 | 26.0 | 6/9/2011 07:46:01  | 24.137 |
| 10/9/2010 06:28:00 | 26.0 | 6/9/2011 08:22:01  | 23.637 |
| 10/9/2010 07:03:00 | 26.0 | 6/9/2011 08:58:01  | 23.637 |
| 10/9/2010 07:38:00 | 26.0 | 6/9/2011 09:34:01  | 23.637 |
| 10/9/2010 08:13:00 | 26.0 | 6/9/2011 10:10:01  | 23.637 |
| 10/9/2010 08:48:00 | 26.0 | 6/9/2011 10:46:01  | 23.637 |
| 10/9/2010 09:23:00 | 26.0 | 6/9/2011 11:22:01  | 23.637 |
| 10/9/2010 09:58:00 | 26.0 | 6/9/2011 11:58:01  | 23.637 |
| 10/9/2010 10:33:00 | 26.0 | 6/9/2011 12:34:01  | 23.637 |
| 10/9/2010 11:08:00 | 26.0 | 6/9/2011 13:10:01  | 23.637 |
| 10/9/2010 11:43:00 | 26.0 | 6/9/2011 13:46:01  | 23.637 |
| 10/9/2010 12:18:00 | 26.0 | 6/9/2011 14:22:01  | 23.637 |
| 10/9/2010 12:53:00 | 26.0 | 6/9/2011 14:58:01  | 23.637 |
| 10/9/2010 13:28:00 | 26.0 | 6/9/2011 15:34:01  | 23.637 |
| 10/9/2010 14:03:00 | 26.0 | 6/9/2011 16:10:01  | 23.637 |
| 10/9/2010 14:38:00 | 26.0 | 6/9/2011 16:46:01  | 23.637 |
| 10/9/2010 15:13:00 | 26.0 | 6/9/2011 17:22:01  | 23.637 |
| 10/9/2010 15:48:00 | 26.0 | 6/9/2011 17:58:01  | 23.637 |
| 10/9/2010 16:23:00 | 26.0 | 6/9/2011 18:34:01  | 23.637 |
| 10/9/2010 16:58:00 | 26.5 | 6/9/2011 19:10:01  | 23.637 |
| 10/9/2010 17:33:00 | 26.5 | 6/9/2011 19:46:01  | 23.637 |
| 10/9/2010 18:08:00 | 26.5 | 6/9/2011 20:22:01  | 23.637 |
| 10/9/2010 18:43:00 | 26.5 | 6/9/2011 20:58:01  | 23.637 |
| 10/9/2010 19:18:00 | 26.5 | 6/9/2011 21:34:01  | 23.637 |
| 10/9/2010 19:53:00 | 26.5 | 6/9/2011 22:10:01  | 23.637 |
| 10/9/2010 20:28:00 | 26.5 | 6/9/2011 22:46:01  | 23.637 |
| 10/9/2010 21:03:00 | 26.5 | 6/9/2011 23:22:01  | 24.137 |
| 10/9/2010 21:38:00 | 26.5 | 6/9/2011 23:58:01  | 24.137 |
| 10/9/2010 22:13:00 | 26.5 | 6/10/2011 00:34:01 | 24.137 |
| 10/9/2010 22:48:00 | 26.5 | 6/10/2011 01:10:01 | 24.137 |



|                     |      |                    |        |
|---------------------|------|--------------------|--------|
| 10/9/2010 23:23:00  | 26.5 | 6/10/2011 01:46:01 | 24.137 |
| 10/9/2010 23:58:00  | 26.5 | 6/10/2011 02:22:01 | 24.137 |
| 10/10/2010 00:33:00 | 26.5 | 6/10/2011 02:58:01 | 24.137 |
| 10/10/2010 01:08:00 | 26.5 | 6/10/2011 03:34:01 | 24.137 |
| 10/10/2010 01:43:00 | 26.5 | 6/10/2011 04:10:01 | 24.137 |
| 10/10/2010 02:18:00 | 26.5 | 6/10/2011 04:46:01 | 23.637 |
| 10/10/2010 02:53:00 | 26.5 | 6/10/2011 05:22:01 | 23.637 |
| 10/10/2010 03:28:00 | 26.0 | 6/10/2011 05:58:01 | 23.637 |
| 10/10/2010 04:03:00 | 26.0 | 6/10/2011 06:34:01 | 23.637 |
| 10/10/2010 04:38:00 | 26.0 | 6/10/2011 07:10:01 | 23.637 |
| 10/10/2010 05:13:00 | 26.0 | 6/10/2011 07:46:01 | 23.637 |
| 10/10/2010 05:48:00 | 26.0 | 6/10/2011 08:22:01 | 23.637 |
| 10/10/2010 06:23:00 | 26.0 | 6/10/2011 08:58:01 | 23.637 |
| 10/10/2010 06:58:00 | 26.0 | 6/10/2011 09:34:01 | 23.637 |
| 10/10/2010 07:33:00 | 26.0 | 6/10/2011 10:10:01 | 23.637 |
| 10/10/2010 08:08:00 | 26.0 | 6/10/2011 10:46:01 | 23.637 |
| 10/10/2010 08:43:00 | 26.0 | 6/10/2011 11:22:01 | 23.637 |
| 10/10/2010 09:18:00 | 26.0 | 6/10/2011 11:58:01 | 23.637 |
| 10/10/2010 09:53:00 | 26.0 | 6/10/2011 12:34:01 | 23.637 |
| 10/10/2010 10:28:00 | 26.0 | 6/10/2011 13:10:01 | 23.637 |
| 10/10/2010 11:03:00 | 26.0 | 6/10/2011 13:46:01 | 23.637 |
| 10/10/2010 11:38:00 | 26.0 | 6/10/2011 14:22:01 | 23.637 |
| 10/10/2010 12:13:00 | 26.0 | 6/10/2011 14:58:01 | 23.637 |
| 10/10/2010 12:48:00 | 26.0 | 6/10/2011 15:34:01 | 23.637 |
| 10/10/2010 13:23:00 | 26.0 | 6/10/2011 16:10:01 | 23.637 |
| 10/10/2010 13:58:00 | 26.0 | 6/10/2011 16:46:01 | 23.637 |
| 10/10/2010 14:33:00 | 26.0 | 6/10/2011 17:22:01 | 23.637 |
| 10/10/2010 15:08:00 | 26.5 | 6/10/2011 17:58:01 | 23.637 |
| 10/10/2010 15:43:00 | 26.5 | 6/10/2011 18:34:01 | 23.637 |
| 10/10/2010 16:18:00 | 26.5 | 6/10/2011 19:10:01 | 23.637 |
| 10/10/2010 16:53:00 | 26.5 | 6/10/2011 19:46:01 | 23.637 |
| 10/10/2010 17:28:00 | 26.5 | 6/10/2011 20:22:01 | 23.637 |
| 10/10/2010 18:03:00 | 26.5 | 6/10/2011 20:58:01 | 23.637 |
| 10/10/2010 18:38:00 | 26.5 | 6/10/2011 21:34:01 | 23.637 |
| 10/10/2010 19:13:00 | 26.5 | 6/10/2011 22:10:01 | 23.637 |
| 10/10/2010 19:48:00 | 26.5 | 6/10/2011 22:46:01 | 23.637 |
| 10/10/2010 20:23:00 | 26.5 | 6/10/2011 23:22:01 | 23.637 |
| 10/10/2010 20:58:00 | 26.5 | 6/10/2011 23:58:01 | 23.637 |
| 10/10/2010 21:33:00 | 26.5 | 6/11/2011 00:34:01 | 23.637 |
| 10/10/2010 22:08:00 | 26.5 | 6/11/2011 01:10:01 | 23.637 |
| 10/10/2010 22:43:00 | 26.5 | 6/11/2011 01:46:01 | 23.637 |
| 10/10/2010 23:18:00 | 26.5 | 6/11/2011 02:22:01 | 23.637 |
| 10/10/2010 23:53:00 | 26.5 | 6/11/2011 02:58:01 | 23.637 |
| 10/11/2010 00:28:00 | 26.5 | 6/11/2011 03:34:01 | 23.637 |
| 10/11/2010 01:03:00 | 26.5 | 6/11/2011 04:10:01 | 23.637 |
| 10/11/2010 01:38:00 | 26.5 | 6/11/2011 04:46:01 | 23.637 |
| 10/11/2010 02:13:00 | 26.5 | 6/11/2011 05:22:01 | 23.637 |
| 10/11/2010 02:48:00 | 26.5 | 6/11/2011 05:58:01 | 23.637 |
| 10/11/2010 03:23:00 | 26.5 | 6/11/2011 06:34:01 | 23.637 |
| 10/11/2010 03:58:00 | 26.5 | 6/11/2011 07:10:01 | 23.637 |

|                     |      |                    |        |
|---------------------|------|--------------------|--------|
| 10/11/2010 04:33:00 | 26.5 | 6/11/2011 07:46:01 | 23.637 |
| 10/11/2010 05:08:00 | 26.5 | 6/11/2011 08:22:01 | 23.637 |
| 10/11/2010 05:43:00 | 26.5 | 6/11/2011 08:58:01 | 23.637 |
| 10/11/2010 06:18:00 | 26.0 | 6/11/2011 09:34:01 | 23.637 |
| 10/11/2010 06:53:00 | 26.0 | 6/11/2011 10:10:01 | 23.637 |
| 10/11/2010 07:28:00 | 26.0 | 6/11/2011 10:46:01 | 23.637 |
| 10/11/2010 08:03:00 | 26.0 | 6/11/2011 11:22:01 | 23.637 |
| 10/11/2010 08:38:00 | 26.0 | 6/11/2011 11:58:01 | 23.637 |
| 10/11/2010 09:13:00 | 26.0 | 6/11/2011 12:34:01 | 23.637 |
| 10/11/2010 09:48:00 | 26.0 | 6/11/2011 13:10:01 | 23.637 |
| 10/11/2010 10:23:00 | 26.0 | 6/11/2011 13:46:01 | 23.637 |
| 10/11/2010 10:58:00 | 26.0 | 6/11/2011 14:22:01 | 23.637 |
| 10/11/2010 11:33:00 | 26.0 | 6/11/2011 14:58:01 | 23.637 |
| 10/11/2010 12:08:00 | 26.0 | 6/11/2011 15:34:01 | 23.637 |
| 10/11/2010 12:43:00 | 26.0 | 6/11/2011 16:10:01 | 23.637 |
| 10/11/2010 13:18:00 | 26.0 | 6/11/2011 16:46:01 | 23.637 |
| 10/11/2010 13:53:00 | 26.5 | 6/11/2011 17:22:01 | 23.637 |
| 10/11/2010 14:28:00 | 26.5 | 6/11/2011 17:58:01 | 23.637 |
| 10/11/2010 15:03:00 | 26.5 | 6/11/2011 18:34:01 | 23.637 |
| 10/11/2010 15:38:00 | 26.5 | 6/11/2011 19:10:01 | 23.637 |
| 10/11/2010 16:13:00 | 26.5 | 6/11/2011 19:46:01 | 23.637 |
| 10/11/2010 16:48:00 | 26.5 | 6/11/2011 20:22:01 | 23.637 |
| 10/11/2010 17:23:00 | 26.5 | 6/11/2011 20:58:01 | 23.637 |
| 10/11/2010 17:58:00 | 26.5 | 6/11/2011 21:34:01 | 23.637 |
| 10/11/2010 18:33:00 | 26.5 | 6/11/2011 22:10:01 | 23.637 |
| 10/11/2010 19:08:00 | 26.5 | 6/11/2011 22:46:01 | 23.637 |
| 10/11/2010 19:43:00 | 26.5 | 6/11/2011 23:22:01 | 23.637 |
| 10/11/2010 20:18:00 | 26.5 | 6/11/2011 23:58:01 | 23.637 |
| 10/11/2010 20:53:00 | 26.5 | 6/12/2011 00:34:01 | 23.637 |
| 10/11/2010 21:28:00 | 26.5 | 6/12/2011 01:10:01 | 23.637 |
| 10/11/2010 22:03:00 | 26.5 | 6/12/2011 01:46:01 | 23.637 |
| 10/11/2010 22:38:00 | 26.5 | 6/12/2011 02:22:01 | 23.637 |
| 10/11/2010 23:13:00 | 26.5 | 6/12/2011 02:58:01 | 23.637 |
| 10/11/2010 23:48:00 | 26.5 | 6/12/2011 03:34:01 | 23.637 |
| 10/12/2010 00:23:00 | 26.5 | 6/12/2011 04:10:01 | 23.637 |
| 10/12/2010 00:58:00 | 26.5 | 6/12/2011 04:46:01 | 23.637 |
| 10/12/2010 01:33:00 | 26.5 | 6/12/2011 05:22:01 | 23.637 |
| 10/12/2010 02:08:00 | 26.5 | 6/12/2011 05:58:01 | 23.637 |
| 10/12/2010 02:43:00 | 26.5 | 6/12/2011 06:34:01 | 23.637 |
| 10/12/2010 03:18:00 | 26.5 | 6/12/2011 07:10:01 | 23.637 |
| 10/12/2010 03:53:00 | 26.5 | 6/12/2011 07:46:01 | 23.637 |
| 10/12/2010 04:28:00 | 26.5 | 6/12/2011 08:22:01 | 23.637 |
| 10/12/2010 05:03:00 | 26.5 | 6/12/2011 08:58:01 | 23.637 |
| 10/12/2010 05:38:00 | 26.5 | 6/12/2011 09:34:01 | 23.637 |
| 10/12/2010 06:13:00 | 26.5 | 6/12/2011 10:10:01 | 24.137 |
| 10/12/2010 06:48:00 | 26.5 | 6/12/2011 10:46:01 | 24.137 |
| 10/12/2010 07:23:00 | 26.5 | 6/12/2011 11:22:01 | 23.637 |
| 10/12/2010 07:58:00 | 26.5 | 6/12/2011 11:58:01 | 23.637 |
| 10/12/2010 08:33:00 | 26.5 | 6/12/2011 12:34:01 | 23.637 |
| 10/12/2010 09:08:00 | 26.5 | 6/12/2011 13:10:01 | 23.637 |

|                     |      |                    |        |
|---------------------|------|--------------------|--------|
| 10/12/2010 09:43:00 | 26.5 | 6/12/2011 13:46:01 | 23.637 |
| 10/12/2010 10:18:00 | 26.5 | 6/12/2011 14:22:01 | 23.637 |
| 10/12/2010 10:53:00 | 26.5 | 6/12/2011 14:58:01 | 23.637 |
| 10/12/2010 11:28:00 | 26.5 | 6/12/2011 15:34:01 | 23.637 |
| 10/12/2010 12:03:00 | 26.5 | 6/12/2011 16:10:01 | 23.637 |
| 10/12/2010 12:38:00 | 26.5 | 6/12/2011 16:46:01 | 23.637 |
| 10/12/2010 13:13:00 | 26.5 | 6/12/2011 17:22:01 | 23.637 |
| 10/12/2010 13:48:00 | 26.5 | 6/12/2011 17:58:01 | 23.637 |
| 10/12/2010 14:23:00 | 26.5 | 6/12/2011 18:34:01 | 23.637 |
| 10/12/2010 14:58:00 | 26.5 | 6/12/2011 19:10:01 | 23.637 |
| 10/12/2010 15:33:00 | 26.5 | 6/12/2011 19:46:01 | 23.637 |
| 10/12/2010 16:08:00 | 26.5 | 6/12/2011 20:22:01 | 23.637 |
| 10/12/2010 16:43:00 | 26.5 | 6/12/2011 20:58:01 | 24.137 |
| 10/12/2010 17:18:00 | 26.5 | 6/12/2011 21:34:01 | 24.137 |
| 10/12/2010 17:53:00 | 26.5 | 6/12/2011 22:10:01 | 23.637 |
| 10/12/2010 18:28:00 | 26.5 | 6/12/2011 22:46:01 | 23.637 |
| 10/12/2010 19:03:00 | 26.5 | 6/12/2011 23:22:01 | 23.637 |
| 10/12/2010 19:38:00 | 26.5 | 6/12/2011 23:58:01 | 23.637 |
| 10/12/2010 20:13:00 | 26.5 | 6/13/2011 00:34:01 | 23.637 |
| 10/12/2010 20:48:00 | 26.5 | 6/13/2011 01:10:01 | 23.637 |
| 10/12/2010 21:23:00 | 26.5 | 6/13/2011 01:46:01 | 23.637 |
| 10/12/2010 21:58:00 | 26.5 | 6/13/2011 02:22:01 | 23.637 |
| 10/12/2010 22:33:00 | 26.5 | 6/13/2011 02:58:01 | 23.637 |
| 10/12/2010 23:08:00 | 26.5 | 6/13/2011 03:34:01 | 23.637 |
| 10/12/2010 23:43:00 | 26.5 | 6/13/2011 04:10:01 | 23.637 |
| 10/13/2010 00:18:00 | 26.5 | 6/13/2011 04:46:01 | 23.637 |
| 10/13/2010 00:53:00 | 26.5 | 6/13/2011 05:22:01 | 23.637 |
| 10/13/2010 01:28:00 | 26.5 | 6/13/2011 05:58:01 | 23.637 |
| 10/13/2010 02:03:00 | 26.5 | 6/13/2011 06:34:01 | 23.637 |
| 10/13/2010 02:38:00 | 26.5 | 6/13/2011 07:10:01 | 23.637 |
| 10/13/2010 03:13:00 | 26.5 | 6/13/2011 07:46:01 | 23.637 |
| 10/13/2010 03:48:00 | 26.5 | 6/13/2011 08:22:01 | 23.637 |
| 10/13/2010 04:23:00 | 26.5 | 6/13/2011 08:58:01 | 23.637 |
| 10/13/2010 04:58:00 | 26.5 | 6/13/2011 09:34:01 | 23.637 |
| 10/13/2010 05:33:00 | 26.5 | 6/13/2011 10:10:01 | 23.637 |
| 10/13/2010 06:08:00 | 26.5 | 6/13/2011 10:46:01 | 23.637 |
| 10/13/2010 06:43:00 | 26.5 | 6/13/2011 11:22:01 | 23.637 |
| 10/13/2010 07:18:00 | 26.5 | 6/13/2011 11:58:01 | 23.637 |
| 10/13/2010 07:53:00 | 26.0 | 6/13/2011 12:34:01 | 23.637 |
| 10/13/2010 08:28:00 | 26.0 | 6/13/2011 13:10:01 | 23.637 |
| 10/13/2010 09:03:00 | 26.0 | 6/13/2011 13:46:01 | 23.637 |
| 10/13/2010 09:38:00 | 26.0 | 6/13/2011 14:22:01 | 23.637 |
| 10/13/2010 10:13:00 | 26.0 | 6/13/2011 14:58:01 | 23.637 |
| 10/13/2010 10:48:00 | 26.0 | 6/13/2011 15:34:01 | 23.637 |
| 10/13/2010 11:23:00 | 26.0 | 6/13/2011 16:10:01 | 23.637 |
| 10/13/2010 11:58:00 | 26.0 | 6/13/2011 16:46:01 | 23.637 |
| 10/13/2010 12:33:00 | 26.0 | 6/13/2011 17:22:01 | 23.637 |
| 10/13/2010 13:08:00 | 26.5 | 6/13/2011 17:58:01 | 23.637 |
| 10/13/2010 13:43:00 | 26.5 | 6/13/2011 18:34:01 | 23.637 |
| 10/13/2010 14:18:00 | 26.5 | 6/13/2011 19:10:01 | 23.637 |

|                     |      |                    |        |
|---------------------|------|--------------------|--------|
| 10/13/2010 14:53:00 | 26.5 | 6/13/2011 19:46:01 | 23.637 |
| 10/13/2010 15:28:00 | 26.5 | 6/13/2011 20:22:01 | 23.637 |
| 10/13/2010 16:03:00 | 26.5 | 6/13/2011 20:58:01 | 23.637 |
| 10/13/2010 16:38:00 | 26.5 | 6/13/2011 21:34:01 | 23.637 |
| 10/13/2010 17:13:00 | 26.5 | 6/13/2011 22:10:01 | 23.637 |
| 10/13/2010 17:48:00 | 26.5 | 6/13/2011 22:46:01 | 23.637 |
| 10/13/2010 18:23:00 | 26.5 | 6/13/2011 23:22:01 | 23.637 |
| 10/13/2010 18:58:00 | 26.5 | 6/13/2011 23:58:01 | 23.637 |
| 10/13/2010 19:33:00 | 26.5 | 6/14/2011 00:34:01 | 23.637 |
| 10/13/2010 20:08:00 | 26.5 | 6/14/2011 01:10:01 | 23.637 |
| 10/13/2010 20:43:00 | 26.5 | 6/14/2011 01:46:01 | 23.637 |
| 10/13/2010 21:18:00 | 26.5 | 6/14/2011 02:22:01 | 23.637 |
| 10/13/2010 21:53:00 | 26.5 | 6/14/2011 02:58:01 | 23.637 |
| 10/13/2010 22:28:00 | 26.5 | 6/14/2011 03:34:01 | 23.637 |
| 10/13/2010 23:03:00 | 26.5 | 6/14/2011 04:10:01 | 23.637 |
| 10/13/2010 23:38:00 | 26.5 | 6/14/2011 04:46:01 | 23.637 |
| 10/14/2010 00:13:00 | 26.5 | 6/14/2011 05:22:01 | 23.637 |
| 10/14/2010 00:48:00 | 26.5 | 6/14/2011 05:58:01 | 23.637 |
| 10/14/2010 01:23:00 | 26.5 | 6/14/2011 06:34:01 | 23.637 |
| 10/14/2010 01:58:00 | 26.5 | 6/14/2011 07:10:01 | 23.637 |
| 10/14/2010 02:33:00 | 26.5 | 6/14/2011 07:46:01 | 23.637 |
| 10/14/2010 03:08:00 | 26.5 | 6/14/2011 08:22:01 | 23.637 |
| 10/14/2010 03:43:00 | 26.5 | 6/14/2011 08:58:01 | 23.637 |
| 10/14/2010 04:18:00 | 26.5 | 6/14/2011 09:34:01 | 23.637 |
| 10/14/2010 04:53:00 | 26.5 | 6/14/2011 10:10:01 | 23.637 |
| 10/14/2010 05:28:00 | 26.5 | 6/14/2011 10:46:01 | 23.137 |
| 10/14/2010 06:03:00 | 26.5 | 6/14/2011 11:22:01 | 23.137 |
| 10/14/2010 06:38:00 | 26.5 | 6/14/2011 11:58:01 | 23.137 |
| 10/14/2010 07:13:00 | 26.5 | 6/14/2011 12:34:01 | 23.137 |
| 10/14/2010 07:48:00 | 26.5 | 6/14/2011 13:10:01 | 23.137 |
| 10/14/2010 08:23:00 | 26.0 | 6/14/2011 13:46:01 | 23.137 |
| 10/14/2010 08:58:00 | 26.0 | 6/14/2011 14:22:01 | 23.137 |
| 10/14/2010 09:33:00 | 26.0 | 6/14/2011 14:58:01 | 23.137 |
| 10/14/2010 10:08:00 | 26.0 | 6/14/2011 15:34:01 | 23.637 |
| 10/14/2010 10:43:00 | 26.0 | 6/14/2011 16:10:01 | 23.637 |
| 10/14/2010 11:18:00 | 26.0 | 6/14/2011 16:46:01 | 23.637 |
| 10/14/2010 11:53:00 | 26.0 | 6/14/2011 17:22:01 | 23.637 |
| 10/14/2010 12:28:00 | 26.0 | 6/14/2011 17:58:01 | 23.637 |
| 10/14/2010 13:03:00 | 26.0 | 6/14/2011 18:34:01 | 23.637 |
| 10/14/2010 13:38:00 | 26.5 | 6/14/2011 19:10:01 | 23.637 |
| 10/14/2010 14:13:00 | 26.5 | 6/14/2011 19:46:01 | 23.637 |
| 10/14/2010 14:48:00 | 26.5 | 6/14/2011 20:22:01 | 23.637 |
| 10/14/2010 15:23:00 | 26.5 | 6/14/2011 20:58:01 | 23.637 |
| 10/14/2010 15:58:00 | 26.5 | 6/14/2011 21:34:01 | 23.637 |
| 10/14/2010 16:33:00 | 26.5 | 6/14/2011 22:10:01 | 23.637 |
| 10/14/2010 17:08:00 | 26.5 | 6/14/2011 22:46:01 | 23.637 |
| 10/14/2010 17:43:00 | 26.5 | 6/14/2011 23:22:01 | 23.637 |
| 10/14/2010 18:18:00 | 26.5 | 6/14/2011 23:58:01 | 23.637 |
| 10/14/2010 18:53:00 | 26.5 | 6/15/2011 00:34:01 | 23.637 |
| 10/14/2010 19:28:00 | 26.5 | 6/15/2011 01:10:01 | 23.137 |

|                     |      |                    |        |
|---------------------|------|--------------------|--------|
| 10/14/2010 20:03:00 | 26.5 | 6/15/2011 01:46:01 | 23.137 |
| 10/14/2010 20:38:00 | 26.5 | 6/15/2011 02:22:01 | 23.137 |
| 10/14/2010 21:13:00 | 26.5 | 6/15/2011 02:58:01 | 23.637 |
| 10/14/2010 21:48:00 | 26.5 | 6/15/2011 03:34:01 | 23.637 |
| 10/14/2010 22:23:00 | 26.5 | 6/15/2011 04:10:01 | 23.637 |
| 10/14/2010 22:58:00 | 26.5 | 6/15/2011 04:46:01 | 23.137 |
| 10/14/2010 23:33:00 | 26.5 | 6/15/2011 05:22:01 | 23.137 |
| 10/15/2010 00:08:00 | 26.5 | 6/15/2011 05:58:01 | 23.137 |
| 10/15/2010 00:43:00 | 26.5 | 6/15/2011 06:34:01 | 23.137 |
| 10/15/2010 01:18:00 | 26.5 | 6/15/2011 07:10:01 | 23.137 |
| 10/15/2010 01:53:00 | 26.5 | 6/15/2011 07:46:01 | 23.137 |
| 10/15/2010 02:28:00 | 26.5 | 6/15/2011 08:22:01 | 23.137 |
| 10/15/2010 03:03:00 | 26.5 | 6/15/2011 08:58:01 | 23.137 |
| 10/15/2010 03:38:00 | 26.5 | 6/15/2011 09:34:01 | 23.137 |
| 10/15/2010 04:13:00 | 26.5 | 6/15/2011 10:10:01 | 23.137 |
| 10/15/2010 04:48:00 | 26.5 | 6/15/2011 10:46:01 | 23.137 |
| 10/15/2010 05:23:00 | 26.5 | 6/15/2011 11:22:01 | 23.137 |
| 10/15/2010 05:58:00 | 26.5 | 6/15/2011 11:58:01 | 23.137 |
| 10/15/2010 06:33:00 | 26.5 | 6/15/2011 12:34:01 | 23.137 |
| 10/15/2010 07:08:00 | 26.5 | 6/15/2011 13:10:01 | 23.137 |
| 10/15/2010 07:43:00 | 26.5 | 6/15/2011 13:46:01 | 23.137 |
| 10/15/2010 08:18:00 | 26.5 | 6/15/2011 14:22:01 | 23.137 |
| 10/15/2010 08:53:00 | 26.5 | 6/15/2011 14:58:01 | 23.137 |
| 10/15/2010 09:28:00 | 26.0 | 6/15/2011 15:34:01 | 23.637 |
| 10/15/2010 10:03:00 | 26.0 | 6/15/2011 16:10:01 | 23.637 |
| 10/15/2010 10:38:00 | 26.0 | 6/15/2011 16:46:01 | 23.637 |
| 10/15/2010 11:13:00 | 26.0 | 6/15/2011 17:22:01 | 23.637 |
| 10/15/2010 11:48:00 | 26.5 | 6/15/2011 17:58:01 | 23.637 |
| 10/15/2010 12:23:00 | 26.5 | 6/15/2011 18:34:01 | 23.637 |
| 10/15/2010 12:58:00 | 26.5 | 6/15/2011 19:10:01 | 23.637 |
| 10/15/2010 13:33:00 | 26.5 | 6/15/2011 19:46:01 | 23.637 |
| 10/15/2010 14:08:00 | 26.5 | 6/15/2011 20:22:01 | 23.637 |
| 10/15/2010 14:43:00 | 26.5 | 6/15/2011 20:58:01 | 23.637 |
| 10/15/2010 15:18:00 | 26.5 | 6/15/2011 21:34:01 | 23.637 |
| 10/15/2010 15:53:00 | 26.5 | 6/15/2011 22:10:01 | 23.637 |
| 10/15/2010 16:28:00 | 26.5 | 6/15/2011 22:46:01 | 23.637 |
| 10/15/2010 17:03:00 | 26.5 | 6/15/2011 23:22:01 | 23.637 |
| 10/15/2010 17:38:00 | 26.5 | 6/15/2011 23:58:01 | 23.637 |
| 10/15/2010 18:13:00 | 26.5 | 6/16/2011 00:34:01 | 23.637 |
| 10/15/2010 18:48:00 | 26.5 | 6/16/2011 01:10:01 | 23.637 |
| 10/15/2010 19:23:00 | 26.5 | 6/16/2011 01:46:01 | 23.637 |
| 10/15/2010 19:58:00 | 26.5 | 6/16/2011 02:22:01 | 23.637 |
| 10/15/2010 20:33:00 | 26.5 | 6/16/2011 02:58:01 | 23.637 |
| 10/15/2010 21:08:00 | 26.5 | 6/16/2011 03:34:01 | 23.637 |
| 10/15/2010 21:43:00 | 26.5 | 6/16/2011 04:10:01 | 23.637 |
| 10/15/2010 22:18:00 | 26.5 | 6/16/2011 04:46:01 | 23.637 |
| 10/15/2010 22:53:00 | 26.5 | 6/16/2011 05:22:01 | 23.637 |
| 10/15/2010 23:28:00 | 26.5 | 6/16/2011 05:58:01 | 23.637 |
| 10/16/2010 00:03:00 | 26.5 | 6/16/2011 06:34:01 | 23.637 |
| 10/16/2010 00:38:00 | 26.5 | 6/16/2011 07:10:01 | 23.637 |

|                     |      |                    |        |
|---------------------|------|--------------------|--------|
| 10/16/2010 01:13:00 | 26.5 | 6/16/2011 07:46:01 | 23.637 |
| 10/16/2010 01:48:00 | 26.5 | 6/16/2011 08:22:01 | 23.637 |
| 10/16/2010 02:23:00 | 26.5 | 6/16/2011 08:58:01 | 23.637 |
| 10/16/2010 02:58:00 | 26.5 | 6/16/2011 09:34:01 | 23.637 |
| 10/16/2010 03:33:00 | 26.5 | 6/16/2011 10:10:01 | 23.637 |
| 10/16/2010 04:08:00 | 26.5 | 6/16/2011 10:46:01 | 23.637 |
| 10/16/2010 04:43:00 | 26.5 | 6/16/2011 11:22:01 | 23.137 |
| 10/16/2010 05:18:00 | 26.5 | 6/16/2011 11:58:01 | 23.137 |
| 10/16/2010 05:53:00 | 26.5 | 6/16/2011 12:34:01 | 23.137 |
| 10/16/2010 06:28:00 | 26.5 | 6/16/2011 13:10:01 | 23.137 |
| 10/16/2010 07:03:00 | 26.5 | 6/16/2011 13:46:01 | 23.637 |
| 10/16/2010 07:38:00 | 26.5 | 6/16/2011 14:22:01 | 23.637 |
| 10/16/2010 08:13:00 | 26.5 | 6/16/2011 14:58:01 | 23.637 |
| 10/16/2010 08:48:00 | 26.5 | 6/16/2011 15:34:01 | 23.637 |
| 10/16/2010 09:23:00 | 26.5 | 6/16/2011 16:10:01 | 23.637 |
| 10/16/2010 09:58:00 | 26.5 | 6/16/2011 16:46:01 | 23.637 |
| 10/16/2010 10:33:00 | 26.5 | 6/16/2011 17:22:01 | 23.637 |
| 10/16/2010 11:08:00 | 26.5 | 6/16/2011 17:58:01 | 23.637 |
| 10/16/2010 11:43:00 | 26.5 | 6/16/2011 18:34:01 | 23.637 |
| 10/16/2010 12:18:00 | 26.5 | 6/16/2011 19:10:01 | 23.637 |
| 10/16/2010 12:53:00 | 26.5 | 6/16/2011 19:46:01 | 23.637 |
| 10/16/2010 13:28:00 | 26.5 | 6/16/2011 20:22:01 | 23.637 |
| 10/16/2010 14:03:00 | 26.5 | 6/16/2011 20:58:01 | 23.637 |
| 10/16/2010 14:38:00 | 26.5 | 6/16/2011 21:34:01 | 23.637 |
| 10/16/2010 15:13:00 | 26.5 | 6/16/2011 22:10:01 | 23.637 |
| 10/16/2010 15:48:00 | 26.5 | 6/16/2011 22:46:01 | 23.637 |
| 10/16/2010 16:23:00 | 26.5 | 6/16/2011 23:22:01 | 23.637 |
| 10/16/2010 16:58:00 | 27.0 | 6/16/2011 23:58:01 | 23.637 |
| 10/16/2010 17:33:00 | 27.0 | 6/17/2011 00:34:01 | 23.637 |
| 10/16/2010 18:08:00 | 27.0 | 6/17/2011 01:10:01 | 23.637 |
| 10/16/2010 18:43:00 | 27.0 | 6/17/2011 01:46:01 | 23.637 |
| 10/16/2010 19:18:00 | 27.0 | 6/17/2011 02:22:01 | 23.637 |
| 10/16/2010 19:53:00 | 27.0 | 6/17/2011 02:58:01 | 23.637 |
| 10/16/2010 20:28:00 | 27.0 | 6/17/2011 03:34:01 | 23.637 |
| 10/16/2010 21:03:00 | 27.0 | 6/17/2011 04:10:01 | 23.637 |
| 10/16/2010 21:38:00 | 27.0 | 6/17/2011 04:46:01 | 23.637 |
| 10/16/2010 22:13:00 | 27.0 | 6/17/2011 05:22:01 | 23.637 |
| 10/16/2010 22:48:00 | 27.0 | 6/17/2011 05:58:01 | 23.637 |
| 10/16/2010 23:23:00 | 27.0 | 6/17/2011 06:34:01 | 23.637 |
| 10/16/2010 23:58:00 | 27.0 | 6/17/2011 07:10:01 | 23.637 |
| 10/17/2010 00:33:00 | 27.0 | 6/17/2011 07:46:01 | 23.637 |
| 10/17/2010 01:08:00 | 27.0 | 6/17/2011 08:22:01 | 23.637 |
| 10/17/2010 01:43:00 | 27.0 | 6/17/2011 08:58:01 | 23.637 |
| 10/17/2010 02:18:00 | 26.5 | 6/17/2011 09:34:01 | 23.637 |
| 10/17/2010 02:53:00 | 26.5 | 6/17/2011 10:10:01 | 23.637 |
| 10/17/2010 03:28:00 | 26.5 | 6/17/2011 10:46:01 | 23.637 |
| 10/17/2010 04:03:00 | 26.5 | 6/17/2011 11:22:01 | 23.637 |
| 10/17/2010 04:38:00 | 26.5 | 6/17/2011 11:58:01 | 23.637 |
| 10/17/2010 05:13:00 | 26.5 | 6/17/2011 12:34:01 | 23.637 |
| 10/17/2010 05:48:00 | 26.5 | 6/17/2011 13:10:01 | 23.637 |

|                     |      |                    |        |
|---------------------|------|--------------------|--------|
| 10/17/2010 06:23:00 | 26.5 | 6/17/2011 13:46:01 | 23.637 |
| 10/17/2010 06:58:00 | 26.5 | 6/17/2011 14:22:01 | 23.637 |
| 10/17/2010 07:33:00 | 26.5 | 6/17/2011 14:58:01 | 23.637 |
| 10/17/2010 08:08:00 | 26.5 | 6/17/2011 15:34:01 | 23.637 |
| 10/17/2010 08:43:00 | 26.5 | 6/17/2011 16:10:01 | 23.637 |
| 10/17/2010 09:18:00 | 26.5 | 6/17/2011 16:46:01 | 23.637 |
| 10/17/2010 09:53:00 | 26.5 | 6/17/2011 17:22:01 | 23.637 |
| 10/17/2010 10:28:00 | 26.5 | 6/17/2011 17:58:01 | 23.637 |
| 10/17/2010 11:03:00 | 26.5 | 6/17/2011 18:34:01 | 23.637 |
| 10/17/2010 11:38:00 | 26.5 | 6/17/2011 19:10:01 | 23.637 |
| 10/17/2010 12:13:00 | 26.5 | 6/17/2011 19:46:01 | 23.637 |
| 10/17/2010 12:48:00 | 26.5 | 6/17/2011 20:22:01 | 23.637 |
| 10/17/2010 13:23:00 | 26.5 | 6/17/2011 20:58:01 | 23.637 |
| 10/17/2010 13:58:00 | 26.5 | 6/17/2011 21:34:01 | 23.637 |
| 10/17/2010 14:33:00 | 26.5 | 6/17/2011 22:10:01 | 23.637 |
| 10/17/2010 15:08:00 | 26.5 | 6/17/2011 22:46:01 | 23.637 |
| 10/17/2010 15:43:00 | 26.5 | 6/17/2011 23:22:01 | 23.637 |
| 10/17/2010 16:18:00 | 26.5 | 6/17/2011 23:58:01 | 23.637 |
| 10/17/2010 16:53:00 | 26.5 | 6/18/2011 00:34:01 | 23.637 |
| 10/17/2010 17:28:00 | 27.0 | 6/18/2011 01:10:01 | 23.637 |
| 10/17/2010 18:03:00 | 27.0 | 6/18/2011 01:46:01 | 23.637 |
| 10/17/2010 18:38:00 | 27.0 | 6/18/2011 02:22:01 | 23.637 |
| 10/17/2010 19:13:00 | 27.0 | 6/18/2011 02:58:01 | 23.637 |
| 10/17/2010 19:48:00 | 27.0 | 6/18/2011 03:34:01 | 23.637 |
| 10/17/2010 20:23:00 | 27.0 | 6/18/2011 04:10:01 | 23.637 |
| 10/17/2010 20:58:00 | 27.0 | 6/18/2011 04:46:01 | 23.637 |
| 10/17/2010 21:33:00 | 27.0 | 6/18/2011 05:22:01 | 23.637 |
| 10/17/2010 22:08:00 | 27.0 | 6/18/2011 05:58:01 | 23.637 |
| 10/17/2010 22:43:00 | 27.0 | 6/18/2011 06:34:01 | 23.637 |
| 10/17/2010 23:18:00 | 27.0 | 6/18/2011 07:10:01 | 23.637 |
| 10/17/2010 23:53:00 | 27.0 | 6/18/2011 07:46:01 | 23.637 |
| 10/18/2010 00:28:00 | 27.0 | 6/18/2011 08:22:01 | 23.637 |
| 10/18/2010 01:03:00 | 27.0 | 6/18/2011 08:58:01 | 23.637 |
| 10/18/2010 01:38:00 | 27.0 | 6/18/2011 09:34:01 | 23.637 |
| 10/18/2010 02:13:00 | 27.0 | 6/18/2011 10:10:01 | 23.637 |
| 10/18/2010 02:48:00 | 26.5 | 6/18/2011 10:46:01 | 23.637 |
| 10/18/2010 03:23:00 | 26.5 | 6/18/2011 11:22:01 | 23.637 |
| 10/18/2010 03:58:00 | 26.5 | 6/18/2011 11:58:01 | 23.637 |
| 10/18/2010 04:33:00 | 26.5 | 6/18/2011 12:34:01 | 23.637 |
| 10/18/2010 05:08:00 | 26.5 | 6/18/2011 13:10:01 | 23.137 |
| 10/18/2010 05:43:00 | 26.5 | 6/18/2011 13:46:01 | 23.137 |
| 10/18/2010 06:18:00 | 26.5 | 6/18/2011 14:22:01 | 23.137 |
| 10/18/2010 06:53:00 | 26.5 | 6/18/2011 14:58:01 | 23.137 |
| 10/18/2010 07:28:00 | 26.5 | 6/18/2011 15:34:01 | 23.137 |
| 10/18/2010 08:03:00 | 26.5 | 6/18/2011 16:10:01 | 23.137 |
| 10/18/2010 08:38:00 | 26.5 | 6/18/2011 16:46:01 | 23.137 |
| 10/18/2010 09:13:00 | 26.5 | 6/18/2011 17:22:01 | 23.137 |
| 10/18/2010 09:48:00 | 26.5 | 6/18/2011 17:58:01 | 23.637 |
| 10/18/2010 10:23:00 | 26.5 | 6/18/2011 18:34:01 | 23.637 |
| 10/18/2010 10:58:00 | 26.5 | 6/18/2011 19:10:01 | 23.637 |

|                     |      |                    |        |
|---------------------|------|--------------------|--------|
| 10/18/2010 11:33:00 | 26.5 | 6/18/2011 19:46:01 | 23.637 |
| 10/18/2010 12:08:00 | 26.5 | 6/18/2011 20:22:01 | 23.637 |
| 10/18/2010 12:43:00 | 26.5 | 6/18/2011 20:58:01 | 23.637 |
| 10/18/2010 13:18:00 | 26.5 | 6/18/2011 21:34:01 | 23.637 |
| 10/18/2010 13:53:00 | 27.0 | 6/18/2011 22:10:01 | 23.637 |
| 10/18/2010 14:28:00 | 27.0 | 6/18/2011 22:46:01 | 23.637 |
| 10/18/2010 15:03:00 | 27.0 | 6/18/2011 23:22:01 | 23.637 |
| 10/18/2010 15:38:00 | 27.0 | 6/18/2011 23:58:01 | 23.637 |
| 10/18/2010 16:13:00 | 27.0 | 6/19/2011 00:34:01 | 23.637 |
| 10/18/2010 16:48:00 | 27.0 | 6/19/2011 01:10:01 | 23.637 |
| 10/18/2010 17:23:00 | 27.0 | 6/19/2011 01:46:01 | 23.637 |
| 10/18/2010 17:58:00 | 27.0 | 6/19/2011 02:22:01 | 23.637 |
| 10/18/2010 18:33:00 | 27.0 | 6/19/2011 02:58:01 | 23.637 |
| 10/18/2010 19:08:00 | 27.0 | 6/19/2011 03:34:01 | 23.637 |
| 10/18/2010 19:43:00 | 27.0 | 6/19/2011 04:10:01 | 23.637 |
| 10/18/2010 20:18:00 | 27.0 | 6/19/2011 04:46:01 | 23.637 |
| 10/18/2010 20:53:00 | 27.0 | 6/19/2011 05:22:01 | 23.637 |
| 10/18/2010 21:28:00 | 27.0 | 6/19/2011 05:58:01 | 23.637 |
| 10/18/2010 22:03:00 | 27.0 | 6/19/2011 06:34:01 | 23.637 |
| 10/18/2010 22:38:00 | 27.0 | 6/19/2011 07:10:01 | 23.637 |
| 10/18/2010 23:13:00 | 27.0 | 6/19/2011 07:46:01 | 23.637 |
| 10/18/2010 23:48:00 | 27.0 | 6/19/2011 08:22:01 | 23.637 |
| 10/19/2010 00:23:00 | 27.0 | 6/19/2011 08:58:01 | 23.637 |
| 10/19/2010 00:58:00 | 27.0 | 6/19/2011 09:34:01 | 23.637 |
| 10/19/2010 01:33:00 | 27.0 | 6/19/2011 10:10:01 | 23.637 |
| 10/19/2010 02:08:00 | 27.0 | 6/19/2011 10:46:01 | 23.637 |
| 10/19/2010 02:43:00 | 27.0 | 6/19/2011 11:22:01 | 23.637 |
| 10/19/2010 03:18:00 | 27.0 | 6/19/2011 11:58:01 | 23.637 |
| 10/19/2010 03:53:00 | 27.0 | 6/19/2011 12:34:01 | 23.637 |
| 10/19/2010 04:28:00 | 27.0 | 6/19/2011 13:10:01 | 23.637 |
| 10/19/2010 05:03:00 | 27.0 | 6/19/2011 13:46:01 | 23.637 |
| 10/19/2010 05:38:00 | 27.0 | 6/19/2011 14:22:01 | 23.637 |
| 10/19/2010 06:13:00 | 27.0 | 6/19/2011 14:58:01 | 23.637 |
| 10/19/2010 06:48:00 | 27.0 | 6/19/2011 15:34:01 | 23.637 |
| 10/19/2010 07:23:00 | 26.5 | 6/19/2011 16:10:01 | 23.637 |
| 10/19/2010 07:58:00 | 26.5 | 6/19/2011 16:46:01 | 23.637 |
| 10/19/2010 08:33:00 | 26.5 | 6/19/2011 17:22:01 | 23.637 |
| 10/19/2010 09:08:00 | 26.5 | 6/19/2011 17:58:01 | 23.637 |
| 10/19/2010 09:43:00 | 26.5 | 6/19/2011 18:34:01 | 23.637 |
| 10/19/2010 10:18:00 | 26.5 | 6/19/2011 19:10:01 | 23.637 |
| 10/19/2010 10:53:00 | 26.5 | 6/19/2011 19:46:01 | 23.637 |
| 10/19/2010 11:28:00 | 26.5 | 6/19/2011 20:22:01 | 23.637 |
| 10/19/2010 12:03:00 | 26.5 | 6/19/2011 20:58:01 | 23.637 |
| 10/19/2010 12:38:00 | 26.5 | 6/19/2011 21:34:01 | 23.637 |
| 10/19/2010 13:13:00 | 26.5 | 6/19/2011 22:10:01 | 23.637 |
| 10/19/2010 13:48:00 | 26.5 | 6/19/2011 22:46:01 | 23.637 |
| 10/19/2010 14:23:00 | 27.0 | 6/19/2011 23:22:01 | 23.637 |
| 10/19/2010 14:58:00 | 27.0 | 6/19/2011 23:58:01 | 23.637 |
| 10/19/2010 15:33:00 | 27.0 | 6/20/2011 00:34:01 | 23.637 |
| 10/19/2010 16:08:00 | 27.0 | 6/20/2011 01:10:01 | 24.137 |



|                     |      |                    |        |
|---------------------|------|--------------------|--------|
| 10/19/2010 16:43:00 | 27.0 | 6/20/2011 01:46:01 | 24.137 |
| 10/19/2010 17:18:00 | 27.0 | 6/20/2011 02:22:01 | 24.137 |
| 10/19/2010 17:53:00 | 27.0 | 6/20/2011 02:58:01 | 23.637 |
| 10/19/2010 18:28:00 | 27.0 | 6/20/2011 03:34:01 | 23.637 |
| 10/19/2010 19:03:00 | 27.0 | 6/20/2011 04:10:01 | 23.637 |
| 10/19/2010 19:38:00 | 27.0 | 6/20/2011 04:46:01 | 23.637 |
| 10/19/2010 20:13:00 | 27.0 | 6/20/2011 05:22:01 | 23.637 |
| 10/19/2010 20:48:00 | 27.0 | 6/20/2011 05:58:01 | 23.637 |
| 10/19/2010 21:23:00 | 27.0 | 6/20/2011 06:34:01 | 23.637 |
| 10/19/2010 21:58:00 | 27.0 | 6/20/2011 07:10:01 | 23.637 |
| 10/19/2010 22:33:00 | 27.0 | 6/20/2011 07:46:01 | 23.637 |
| 10/19/2010 23:08:00 | 27.0 | 6/20/2011 08:22:01 | 23.637 |
| 10/19/2010 23:43:00 | 27.0 | 6/20/2011 08:58:01 | 24.137 |
| 10/20/2010 00:18:00 | 27.0 | 6/20/2011 09:34:01 | 23.637 |
| 10/20/2010 00:53:00 | 27.0 | 6/20/2011 10:10:01 | 23.637 |
| 10/20/2010 01:28:00 | 27.0 | 6/20/2011 10:46:01 | 23.637 |
| 10/20/2010 02:03:00 | 27.0 | 6/20/2011 11:22:01 | 23.637 |
| 10/20/2010 02:38:00 | 27.0 | 6/20/2011 11:58:01 | 23.637 |
| 10/20/2010 03:13:00 | 27.0 | 6/20/2011 12:34:01 | 23.637 |
| 10/20/2010 03:48:00 | 27.0 | 6/20/2011 13:10:01 | 23.637 |
| 10/20/2010 04:23:00 | 27.0 | 6/20/2011 13:46:01 | 23.637 |
| 10/20/2010 04:58:00 | 27.0 | 6/20/2011 14:22:01 | 23.637 |
| 10/20/2010 05:33:00 | 27.0 | 6/20/2011 14:58:01 | 23.637 |
| 10/20/2010 06:08:00 | 27.0 | 6/20/2011 15:34:01 | 23.637 |
| 10/20/2010 06:43:00 | 27.0 | 6/20/2011 16:10:01 | 23.637 |
| 10/20/2010 07:18:00 | 26.5 | 6/20/2011 16:46:01 | 23.637 |
| 10/20/2010 07:53:00 | 26.5 | 6/20/2011 17:22:01 | 23.637 |
| 10/20/2010 08:28:00 | 26.5 | 6/20/2011 17:58:01 | 23.637 |
| 10/20/2010 09:03:00 | 26.5 | 6/20/2011 18:34:01 | 23.637 |
| 10/20/2010 09:38:00 | 26.5 | 6/20/2011 19:10:01 | 23.637 |
| 10/20/2010 10:13:00 | 26.5 | 6/20/2011 19:46:01 | 23.637 |
| 10/20/2010 10:48:00 | 26.5 | 6/20/2011 20:22:01 | 23.637 |
| 10/20/2010 11:23:00 | 26.5 | 6/20/2011 20:58:01 | 23.637 |
| 10/20/2010 11:58:00 | 26.5 | 6/20/2011 21:34:01 | 23.637 |
| 10/20/2010 12:33:00 | 26.5 | 6/20/2011 22:10:01 | 23.637 |
| 10/20/2010 13:08:00 | 26.5 | 6/20/2011 22:46:01 | 23.637 |
| 10/20/2010 13:43:00 | 27.0 | 6/20/2011 23:22:01 | 23.637 |
| 10/20/2010 14:18:00 | 27.0 | 6/20/2011 23:58:01 | 23.637 |
| 10/20/2010 14:53:00 | 27.0 | 6/21/2011 00:34:01 | 23.637 |
| 10/20/2010 15:28:00 | 27.0 | 6/21/2011 01:10:01 | 23.637 |
| 10/20/2010 16:03:00 | 27.0 | 6/21/2011 01:46:01 | 23.637 |
| 10/20/2010 16:38:00 | 27.0 | 6/21/2011 02:22:01 | 23.637 |
| 10/20/2010 17:13:00 | 27.0 | 6/21/2011 02:58:01 | 23.637 |
| 10/20/2010 17:48:00 | 27.0 | 6/21/2011 03:34:01 | 23.637 |
| 10/20/2010 18:23:00 | 27.0 | 6/21/2011 04:10:01 | 23.637 |
| 10/20/2010 18:58:00 | 27.0 | 6/21/2011 04:46:01 | 23.637 |
| 10/20/2010 19:33:00 | 27.0 | 6/21/2011 05:22:01 | 23.637 |
| 10/20/2010 20:08:00 | 27.0 | 6/21/2011 05:58:01 | 23.637 |
| 10/20/2010 20:43:00 | 27.0 | 6/21/2011 06:34:01 | 23.637 |
| 10/20/2010 21:18:00 | 27.0 | 6/21/2011 07:10:01 | 23.637 |

|                     |      |                    |        |
|---------------------|------|--------------------|--------|
| 10/20/2010 21:53:00 | 27.0 | 6/21/2011 07:46:01 | 23.637 |
| 10/20/2010 22:28:00 | 27.0 | 6/21/2011 08:22:01 | 23.637 |
| 10/20/2010 23:03:00 | 27.0 | 6/21/2011 08:58:01 | 23.637 |
| 10/20/2010 23:38:00 | 27.0 | 6/21/2011 09:34:01 | 23.637 |
| 10/21/2010 00:13:00 | 27.0 | 6/21/2011 10:10:01 | 23.637 |
| 10/21/2010 00:48:00 | 27.0 | 6/21/2011 10:46:01 | 23.637 |
| 10/21/2010 01:23:00 | 27.0 | 6/21/2011 11:22:01 | 23.637 |
| 10/21/2010 01:58:00 | 27.0 | 6/21/2011 11:58:01 | 23.637 |
| 10/21/2010 02:33:00 | 27.0 | 6/21/2011 12:34:01 | 23.637 |
| 10/21/2010 03:08:00 | 27.0 | 6/21/2011 13:10:01 | 23.637 |
| 10/21/2010 03:43:00 | 27.0 | 6/21/2011 13:46:01 | 23.637 |
| 10/21/2010 04:18:00 | 27.0 | 6/21/2011 14:22:01 | 23.637 |
| 10/21/2010 04:53:00 | 27.0 | 6/21/2011 14:58:01 | 23.637 |
| 10/21/2010 05:28:00 | 27.0 | 6/21/2011 15:34:01 | 23.637 |
| 10/21/2010 06:03:00 | 27.0 | 6/21/2011 16:10:01 | 23.637 |
| 10/21/2010 06:38:00 | 27.0 | 6/21/2011 16:46:01 | 23.637 |
| 10/21/2010 07:13:00 | 27.0 | 6/21/2011 17:22:01 | 23.637 |
| 10/21/2010 07:48:00 | 26.5 | 6/21/2011 17:58:01 | 23.637 |
| 10/21/2010 08:23:00 | 26.5 | 6/21/2011 18:34:01 | 23.637 |
| 10/21/2010 08:58:00 | 26.5 | 6/21/2011 19:10:01 | 23.637 |
| 10/21/2010 09:33:00 | 26.5 | 6/21/2011 19:46:01 | 23.637 |
| 10/21/2010 10:08:00 | 26.5 | 6/21/2011 20:22:01 | 23.637 |
| 10/21/2010 10:43:00 | 26.5 | 6/21/2011 20:58:01 | 23.637 |
| 10/21/2010 11:18:00 | 26.5 | 6/21/2011 21:34:01 | 23.637 |
| 10/21/2010 11:53:00 | 26.5 | 6/21/2011 22:10:01 | 23.637 |
| 10/21/2010 12:28:00 | 26.5 | 6/21/2011 22:46:01 | 23.637 |
| 10/21/2010 13:03:00 | 26.5 | 6/21/2011 23:22:01 | 23.637 |
| 10/21/2010 13:38:00 | 26.5 | 6/21/2011 23:58:01 | 23.637 |
| 10/21/2010 14:13:00 | 26.5 | 6/22/2011 00:34:01 | 23.637 |
| 10/21/2010 14:48:00 | 26.5 | 6/22/2011 01:10:01 | 23.637 |
| 10/21/2010 15:23:00 | 26.5 | 6/22/2011 01:46:01 | 23.637 |
| 10/21/2010 15:58:00 | 26.5 | 6/22/2011 02:22:01 | 23.637 |
| 10/21/2010 16:33:00 | 27.0 | 6/22/2011 02:58:01 | 23.637 |
| 10/21/2010 17:08:00 | 27.0 | 6/22/2011 03:34:01 | 23.637 |
| 10/21/2010 17:43:00 | 27.0 | 6/22/2011 04:10:01 | 23.637 |
| 10/21/2010 18:18:00 | 27.0 | 6/22/2011 04:46:01 | 23.637 |
| 10/21/2010 18:53:00 | 27.0 | 6/22/2011 05:22:01 | 23.637 |
| 10/21/2010 19:28:00 | 27.0 | 6/22/2011 05:58:01 | 23.637 |
| 10/21/2010 20:03:00 | 27.0 | 6/22/2011 06:34:01 | 23.637 |
| 10/21/2010 20:38:00 | 27.0 | 6/22/2011 07:10:01 | 23.637 |
| 10/21/2010 21:13:00 | 27.0 | 6/22/2011 07:46:01 | 23.637 |
| 10/21/2010 21:48:00 | 27.0 | 6/22/2011 08:22:01 | 23.637 |
| 10/21/2010 22:23:00 | 27.0 | 6/22/2011 08:58:01 | 23.637 |
| 10/21/2010 22:58:00 | 27.0 | 6/22/2011 09:34:01 | 23.637 |
| 10/21/2010 23:33:00 | 27.0 | 6/22/2011 10:10:01 | 23.637 |
| 10/22/2010 00:08:00 | 27.0 | 6/22/2011 10:46:01 | 23.637 |
| 10/22/2010 00:43:00 | 27.0 | 6/22/2011 11:22:01 | 23.637 |
| 10/22/2010 01:18:00 | 27.0 | 6/22/2011 11:58:01 | 23.637 |
| 10/22/2010 01:53:00 | 27.0 | 6/22/2011 12:34:01 | 23.637 |
| 10/22/2010 02:28:00 | 27.0 | 6/22/2011 13:10:01 | 23.637 |

|                     |      |                    |        |
|---------------------|------|--------------------|--------|
| 10/22/2010 03:03:00 | 27.0 | 6/22/2011 13:46:01 | 23.637 |
| 10/22/2010 03:38:00 | 27.0 | 6/22/2011 14:22:01 | 23.637 |
| 10/22/2010 04:13:00 | 26.5 | 6/22/2011 14:58:01 | 23.637 |
| 10/22/2010 04:48:00 | 26.5 | 6/22/2011 15:34:01 | 24.137 |
| 10/22/2010 05:23:00 | 26.5 | 6/22/2011 16:10:01 | 23.637 |
| 10/22/2010 05:58:00 | 26.5 | 6/22/2011 16:46:01 | 23.637 |
| 10/22/2010 06:33:00 | 26.5 | 6/22/2011 17:22:01 | 23.637 |
| 10/22/2010 07:08:00 | 26.5 | 6/22/2011 17:58:01 | 23.637 |
| 10/22/2010 07:43:00 | 26.5 | 6/22/2011 18:34:01 | 23.637 |
| 10/22/2010 08:18:00 | 26.5 | 6/22/2011 19:10:01 | 23.637 |
| 10/22/2010 08:53:00 | 26.5 | 6/22/2011 19:46:01 | 23.637 |
| 10/22/2010 09:28:00 | 26.5 | 6/22/2011 20:22:01 | 23.637 |
| 10/22/2010 10:03:00 | 26.5 | 6/22/2011 20:58:01 | 23.637 |
| 10/22/2010 10:38:00 | 26.5 | 6/22/2011 21:34:01 | 23.637 |
| 10/22/2010 11:13:00 | 26.5 | 6/22/2011 22:10:01 | 23.637 |
| 10/22/2010 11:48:00 | 26.5 | 6/22/2011 22:46:01 | 23.637 |
| 10/22/2010 12:23:00 | 26.5 | 6/22/2011 23:22:01 | 23.637 |
| 10/22/2010 12:58:00 | 26.5 | 6/22/2011 23:58:01 | 23.637 |
| 10/22/2010 13:33:00 | 26.5 | 6/23/2011 00:34:01 | 23.637 |
| 10/22/2010 14:08:00 | 26.5 | 6/23/2011 01:10:01 | 23.637 |
| 10/22/2010 14:43:00 | 27.0 | 6/23/2011 01:46:01 | 23.637 |
| 10/22/2010 15:18:00 | 27.0 | 6/23/2011 02:22:01 | 23.637 |
| 10/22/2010 15:53:00 | 27.0 | 6/23/2011 02:58:01 | 23.637 |
| 10/22/2010 16:28:00 | 27.0 | 6/23/2011 03:34:01 | 23.637 |
| 10/22/2010 17:03:00 | 27.0 | 6/23/2011 04:10:01 | 23.637 |
| 10/22/2010 17:38:00 | 27.0 | 6/23/2011 04:46:01 | 23.637 |
| 10/22/2010 18:13:00 | 27.0 | 6/23/2011 05:22:01 | 23.637 |
| 10/22/2010 18:48:00 | 27.0 | 6/23/2011 05:58:01 | 23.637 |
| 10/22/2010 19:23:00 | 27.0 | 6/23/2011 06:34:01 | 23.637 |
| 10/22/2010 19:58:00 | 27.0 | 6/23/2011 07:10:01 | 23.637 |
| 10/22/2010 20:33:00 | 27.0 | 6/23/2011 07:46:01 | 23.637 |
| 10/22/2010 21:08:00 | 27.0 | 6/23/2011 08:22:01 | 23.637 |
| 10/22/2010 21:43:00 | 27.0 | 6/23/2011 08:58:01 | 23.637 |
| 10/22/2010 22:18:00 | 27.0 | 6/23/2011 09:34:01 | 23.637 |
| 10/22/2010 22:53:00 | 27.0 | 6/23/2011 10:10:01 | 23.637 |
| 10/22/2010 23:28:00 | 27.0 | 6/23/2011 10:46:01 | 23.637 |
| 10/23/2010 00:03:00 | 27.0 | 6/23/2011 11:22:01 | 23.637 |
| 10/23/2010 00:38:00 | 27.0 | 6/23/2011 11:58:01 | 23.637 |
| 10/23/2010 01:13:00 | 27.0 | 6/23/2011 12:34:01 | 23.637 |
| 10/23/2010 01:48:00 | 27.0 | 6/23/2011 13:10:01 | 23.637 |
| 10/23/2010 02:23:00 | 27.0 | 6/23/2011 13:46:01 | 23.637 |
| 10/23/2010 02:58:00 | 27.0 | 6/23/2011 14:22:01 | 23.637 |
| 10/23/2010 03:33:00 | 26.5 | 6/23/2011 14:58:01 | 23.637 |
| 10/23/2010 04:08:00 | 26.5 | 6/23/2011 15:34:01 | 23.637 |
| 10/23/2010 04:43:00 | 26.5 | 6/23/2011 16:10:01 | 23.637 |
| 10/23/2010 05:18:00 | 26.5 | 6/23/2011 16:46:01 | 23.637 |
| 10/23/2010 05:53:00 | 26.5 | 6/23/2011 17:22:01 | 23.637 |
| 10/23/2010 06:28:00 | 26.5 | 6/23/2011 17:58:01 | 23.637 |
| 10/23/2010 07:03:00 | 26.5 | 6/23/2011 18:34:01 | 23.637 |
| 10/23/2010 07:38:00 | 26.5 | 6/23/2011 19:10:01 | 23.637 |

|                     |      |                    |        |
|---------------------|------|--------------------|--------|
| 10/23/2010 08:13:00 | 26.5 | 6/23/2011 19:46:01 | 23.637 |
| 10/23/2010 08:48:00 | 26.5 | 6/23/2011 20:22:01 | 23.637 |
| 10/23/2010 09:23:00 | 26.5 | 6/23/2011 20:58:01 | 23.637 |
| 10/23/2010 09:58:00 | 26.5 | 6/23/2011 21:34:01 | 23.637 |
| 10/23/2010 10:33:00 | 26.5 | 6/23/2011 22:10:01 | 23.637 |
| 10/23/2010 11:08:00 | 26.5 | 6/23/2011 22:46:01 | 23.637 |
| 10/23/2010 11:43:00 | 26.5 | 6/23/2011 23:22:01 | 23.637 |
| 10/23/2010 12:18:00 | 26.5 | 6/23/2011 23:58:01 | 23.637 |
| 10/23/2010 12:53:00 | 26.5 | 6/24/2011 00:34:01 | 23.637 |
| 10/23/2010 13:28:00 | 26.5 | 6/24/2011 01:10:01 | 23.637 |
| 10/23/2010 14:03:00 | 26.5 | 6/24/2011 01:46:01 | 23.637 |
| 10/23/2010 14:38:00 | 26.5 | 6/24/2011 02:22:01 | 23.637 |
| 10/23/2010 15:13:00 | 26.5 | 6/24/2011 02:58:01 | 23.637 |
| 10/23/2010 15:48:00 | 26.5 | 6/24/2011 03:34:01 | 23.637 |
| 10/23/2010 16:23:00 | 27.0 | 6/24/2011 04:10:01 | 23.637 |
| 10/23/2010 16:58:00 | 27.0 | 6/24/2011 04:46:01 | 23.637 |
| 10/23/2010 17:33:00 | 27.0 | 6/24/2011 05:22:01 | 23.637 |
| 10/23/2010 18:08:00 | 27.0 | 6/24/2011 05:58:01 | 23.637 |
| 10/23/2010 18:43:00 | 27.0 | 6/24/2011 06:34:01 | 23.637 |
| 10/23/2010 19:18:00 | 27.0 | 6/24/2011 07:10:01 | 23.637 |
| 10/23/2010 19:53:00 | 27.0 | 6/24/2011 07:46:01 | 23.637 |
| 10/23/2010 20:28:00 | 27.0 | 6/24/2011 08:22:01 | 23.637 |
| 10/23/2010 21:03:00 | 27.0 | 6/24/2011 08:58:01 | 23.637 |
| 10/23/2010 21:38:00 | 27.0 | 6/24/2011 09:34:01 | 23.637 |
| 10/23/2010 22:13:00 | 27.0 | 6/24/2011 10:10:01 | 23.637 |
| 10/23/2010 22:48:00 | 27.0 | 6/24/2011 10:46:01 | 23.637 |
| 10/23/2010 23:23:00 | 27.0 | 6/24/2011 11:22:01 | 23.637 |
| 10/23/2010 23:58:00 | 27.0 | 6/24/2011 11:58:01 | 23.637 |
| 10/24/2010 00:33:00 | 27.0 | 6/24/2011 12:34:01 | 23.637 |
| 10/24/2010 01:08:00 | 27.0 | 6/24/2011 13:10:01 | 23.637 |
| 10/24/2010 01:43:00 | 27.0 | 6/24/2011 13:46:01 | 23.637 |
| 10/24/2010 02:18:00 | 27.0 | 6/24/2011 14:22:01 | 23.637 |
| 10/24/2010 02:53:00 | 27.0 | 6/24/2011 14:58:01 | 23.637 |
| 10/24/2010 03:28:00 | 27.0 | 6/24/2011 15:34:01 | 23.637 |
| 10/24/2010 04:03:00 | 26.5 | 6/24/2011 16:10:01 | 23.637 |
| 10/24/2010 04:38:00 | 26.5 | 6/24/2011 16:46:01 | 23.637 |
| 10/24/2010 05:13:00 | 26.5 | 6/24/2011 17:22:01 | 23.637 |
| 10/24/2010 05:48:00 | 26.5 | 6/24/2011 17:58:01 | 23.637 |
| 10/24/2010 06:23:00 | 26.5 | 6/24/2011 18:34:01 | 23.637 |
| 10/24/2010 06:58:00 | 26.5 | 6/24/2011 19:10:01 | 23.637 |
| 10/24/2010 07:33:00 | 26.5 | 6/24/2011 19:46:01 | 23.637 |
| 10/24/2010 08:08:00 | 26.5 | 6/24/2011 20:22:01 | 23.637 |
| 10/24/2010 08:43:00 | 26.5 | 6/24/2011 20:58:01 | 23.637 |
| 10/24/2010 09:18:00 | 26.5 | 6/24/2011 21:34:01 | 23.637 |
| 10/24/2010 09:53:00 | 26.5 | 6/24/2011 22:10:01 | 23.637 |
| 10/24/2010 10:28:00 | 26.5 | 6/24/2011 22:46:01 | 23.637 |
| 10/24/2010 11:03:00 | 26.5 | 6/24/2011 23:22:01 | 23.637 |
| 10/24/2010 11:38:00 | 26.5 | 6/24/2011 23:58:01 | 23.637 |
| 10/24/2010 12:13:00 | 26.5 | 6/25/2011 00:34:01 | 23.637 |
| 10/24/2010 12:48:00 | 26.5 | 6/25/2011 01:10:01 | 23.637 |

|                     |      |                    |        |
|---------------------|------|--------------------|--------|
| 10/24/2010 13:23:00 | 26.5 | 6/25/2011 01:46:01 | 23.637 |
| 10/24/2010 13:58:00 | 26.5 | 6/25/2011 02:22:01 | 23.637 |
| 10/24/2010 14:33:00 | 26.5 | 6/25/2011 02:58:01 | 23.637 |
| 10/24/2010 15:08:00 | 26.5 | 6/25/2011 03:34:01 | 23.637 |
| 10/24/2010 15:43:00 | 26.5 | 6/25/2011 04:10:01 | 23.637 |
| 10/24/2010 16:18:00 | 26.5 | 6/25/2011 04:46:01 | 23.637 |
| 10/24/2010 16:53:00 | 27.0 | 6/25/2011 05:22:01 | 23.637 |
| 10/24/2010 17:28:00 | 27.0 | 6/25/2011 05:58:01 | 23.637 |
| 10/24/2010 18:03:00 | 27.0 | 6/25/2011 06:34:01 | 23.637 |
| 10/24/2010 18:38:00 | 27.0 | 6/25/2011 07:10:01 | 23.637 |
| 10/24/2010 19:13:00 | 27.0 | 6/25/2011 07:46:01 | 23.637 |
| 10/24/2010 19:48:00 | 27.0 | 6/25/2011 08:22:01 | 23.637 |
| 10/24/2010 20:23:00 | 27.0 | 6/25/2011 08:58:01 | 23.637 |
| 10/24/2010 20:58:00 | 27.0 | 6/25/2011 09:34:01 | 23.637 |
| 10/24/2010 21:33:00 | 27.0 | 6/25/2011 10:10:01 | 23.637 |
| 10/24/2010 22:08:00 | 27.0 | 6/25/2011 10:46:01 | 23.637 |
| 10/24/2010 22:43:00 | 27.0 | 6/25/2011 11:22:01 | 23.637 |
| 10/24/2010 23:18:00 | 27.0 | 6/25/2011 11:58:01 | 23.637 |
| 10/24/2010 23:53:00 | 27.0 | 6/25/2011 12:34:01 | 23.637 |
| 10/25/2010 00:28:00 | 27.0 | 6/25/2011 13:10:01 | 23.637 |
| 10/25/2010 01:03:00 | 26.5 | 6/25/2011 13:46:01 | 23.637 |
| 10/25/2010 01:38:00 | 26.5 | 6/25/2011 14:22:01 | 23.637 |
| 10/25/2010 02:13:00 | 26.5 | 6/25/2011 14:58:01 | 23.637 |
| 10/25/2010 02:48:00 | 26.5 | 6/25/2011 15:34:01 | 23.637 |
| 10/25/2010 03:23:00 | 26.5 | 6/25/2011 16:10:01 | 23.637 |
| 10/25/2010 03:58:00 | 26.5 | 6/25/2011 16:46:01 | 23.637 |
| 10/25/2010 04:33:00 | 26.5 | 6/25/2011 17:22:01 | 23.637 |
| 10/25/2010 05:08:00 | 26.5 | 6/25/2011 17:58:01 | 23.637 |
| 10/25/2010 05:43:00 | 26.5 | 6/25/2011 18:34:01 | 23.637 |
| 10/25/2010 06:18:00 | 26.5 | 6/25/2011 19:10:01 | 23.637 |
| 10/25/2010 06:53:00 | 26.5 | 6/25/2011 19:46:01 | 23.637 |
| 10/25/2010 07:28:00 | 26.5 | 6/25/2011 20:22:01 | 23.637 |
| 10/25/2010 08:03:00 | 26.5 | 6/25/2011 20:58:01 | 23.637 |
| 10/25/2010 08:38:00 | 26.5 | 6/25/2011 21:34:01 | 23.637 |
| 10/25/2010 09:13:00 | 26.5 | 6/25/2011 22:10:01 | 23.637 |
| 10/25/2010 09:48:00 | 26.5 | 6/25/2011 22:46:01 | 23.637 |
| 10/25/2010 10:23:00 | 26.5 | 6/25/2011 23:22:01 | 23.637 |
| 10/25/2010 10:58:00 | 26.5 | 6/25/2011 23:58:01 | 23.637 |
| 10/25/2010 11:33:00 | 26.5 | 6/26/2011 00:34:01 | 23.637 |
| 10/25/2010 12:08:00 | 26.5 | 6/26/2011 01:10:01 | 23.637 |
| 10/25/2010 12:43:00 | 26.5 | 6/26/2011 01:46:01 | 23.637 |
| 10/25/2010 13:18:00 | 26.5 | 6/26/2011 02:22:01 | 23.637 |
| 10/25/2010 13:53:00 | 26.5 | 6/26/2011 02:58:01 | 23.637 |
| 10/25/2010 14:28:00 | 26.5 | 6/26/2011 03:34:01 | 23.637 |
| 10/25/2010 15:03:00 | 26.5 | 6/26/2011 04:10:01 | 23.637 |
| 10/25/2010 15:38:00 | 27.0 | 6/26/2011 04:46:01 | 23.637 |
| 10/25/2010 16:13:00 | 27.0 | 6/26/2011 05:22:01 | 23.637 |
| 10/25/2010 16:48:00 | 27.0 | 6/26/2011 05:58:01 | 23.637 |
| 10/25/2010 17:23:00 | 27.0 | 6/26/2011 06:34:01 | 23.637 |
| 10/25/2010 17:58:00 | 27.0 | 6/26/2011 07:10:01 | 23.637 |

|                     |      |                    |        |
|---------------------|------|--------------------|--------|
| 10/25/2010 18:33:00 | 27.0 | 6/26/2011 07:46:01 | 23.637 |
| 10/25/2010 19:08:00 | 27.0 | 6/26/2011 08:22:01 | 23.637 |
| 10/25/2010 19:43:00 | 27.0 | 6/26/2011 08:58:01 | 23.637 |
| 10/25/2010 20:18:00 | 27.0 | 6/26/2011 09:34:01 | 23.637 |
| 10/25/2010 20:53:00 | 27.0 | 6/26/2011 10:10:01 | 23.637 |
| 10/25/2010 21:28:00 | 27.0 | 6/26/2011 10:46:01 | 23.637 |
| 10/25/2010 22:03:00 | 27.0 | 6/26/2011 11:22:01 | 23.637 |
| 10/25/2010 22:38:00 | 27.0 | 6/26/2011 11:58:01 | 23.637 |
| 10/25/2010 23:13:00 | 27.0 | 6/26/2011 12:34:01 | 23.637 |
| 10/25/2010 23:48:00 | 27.0 | 6/26/2011 13:10:01 | 23.637 |
| 10/26/2010 00:23:00 | 27.0 | 6/26/2011 13:46:01 | 23.637 |
| 10/26/2010 00:58:00 | 27.0 | 6/26/2011 14:22:01 | 23.637 |
| 10/26/2010 01:33:00 | 27.0 | 6/26/2011 14:58:01 | 23.137 |
| 10/26/2010 02:08:00 | 27.0 | 6/26/2011 15:34:01 | 23.637 |
| 10/26/2010 02:43:00 | 27.0 | 6/26/2011 16:10:01 | 23.137 |
| 10/26/2010 03:18:00 | 27.0 | 6/26/2011 16:46:01 | 23.137 |
| 10/26/2010 03:53:00 | 27.0 | 6/26/2011 17:22:01 | 23.637 |
| 10/26/2010 04:28:00 | 27.0 | 6/26/2011 17:58:01 | 23.637 |
| 10/26/2010 05:03:00 | 27.0 | 6/26/2011 18:34:01 | 23.637 |
| 10/26/2010 05:38:00 | 27.0 | 6/26/2011 19:10:01 | 23.637 |
| 10/26/2010 06:13:00 | 27.0 | 6/26/2011 19:46:01 | 23.637 |
| 10/26/2010 06:48:00 | 26.5 | 6/26/2011 20:22:01 | 23.637 |
| 10/26/2010 07:23:00 | 26.5 | 6/26/2011 20:58:01 | 23.637 |
| 10/26/2010 07:58:00 | 26.5 | 6/26/2011 21:34:01 | 23.637 |
| 10/26/2010 08:33:00 | 26.5 | 6/26/2011 22:10:01 | 23.637 |
| 10/26/2010 09:08:00 | 26.5 | 6/26/2011 22:46:01 | 23.637 |
| 10/26/2010 09:43:00 | 26.5 | 6/26/2011 23:22:01 | 23.637 |
| 10/26/2010 10:18:00 | 26.5 | 6/26/2011 23:58:01 | 23.637 |
| 10/26/2010 10:53:00 | 26.5 | 6/27/2011 00:34:01 | 23.637 |
| 10/26/2010 11:28:00 | 26.5 | 6/27/2011 01:10:01 | 23.637 |
| 10/26/2010 12:03:00 | 27.0 | 6/27/2011 01:46:01 | 23.637 |
| 10/26/2010 12:38:00 | 27.0 | 6/27/2011 02:22:01 | 23.637 |
| 10/26/2010 13:13:00 | 27.0 | 6/27/2011 02:58:01 | 23.637 |
| 10/26/2010 13:48:00 | 27.0 | 6/27/2011 03:34:01 | 23.637 |
| 10/26/2010 14:23:00 | 27.0 | 6/27/2011 04:10:01 | 23.637 |
| 10/26/2010 14:58:00 | 27.0 | 6/27/2011 04:46:01 | 23.637 |
| 10/26/2010 15:33:00 | 27.0 | 6/27/2011 05:22:01 | 23.637 |
| 10/26/2010 16:08:00 | 27.0 | 6/27/2011 05:58:01 | 23.637 |
| 10/26/2010 16:43:00 | 27.0 | 6/27/2011 06:34:01 | 23.637 |
| 10/26/2010 17:18:00 | 27.5 | 6/27/2011 07:10:01 | 23.637 |
| 10/26/2010 17:53:00 | 27.5 | 6/27/2011 07:46:01 | 23.637 |
| 10/26/2010 18:28:00 | 27.5 | 6/27/2011 08:22:01 | 23.637 |
| 10/26/2010 19:03:00 | 27.5 | 6/27/2011 08:58:01 | 23.637 |
| 10/26/2010 19:38:00 | 27.5 | 6/27/2011 09:34:01 | 23.637 |
| 10/26/2010 20:13:00 | 27.5 | 6/27/2011 10:10:01 | 23.637 |
| 10/26/2010 20:48:00 | 27.5 | 6/27/2011 10:46:01 | 23.637 |
| 10/26/2010 21:23:00 | 27.5 | 6/27/2011 11:22:01 | 23.637 |
| 10/26/2010 21:58:00 | 27.5 | 6/27/2011 11:58:01 | 23.637 |
| 10/26/2010 22:33:00 | 27.5 | 6/27/2011 12:34:01 | 23.637 |
| 10/26/2010 23:08:00 | 27.5 | 6/27/2011 13:10:01 | 23.137 |

|                     |      |                    |        |
|---------------------|------|--------------------|--------|
| 10/26/2010 23:43:00 | 27.5 | 6/27/2011 13:46:01 | 23.637 |
| 10/27/2010 00:18:00 | 27.5 | 6/27/2011 14:22:01 | 23.637 |
| 10/27/2010 00:53:00 | 27.5 | 6/27/2011 14:58:01 | 23.137 |
| 10/27/2010 01:28:00 | 27.5 | 6/27/2011 15:34:01 | 23.137 |
| 10/27/2010 02:03:00 | 27.5 | 6/27/2011 16:10:01 | 23.137 |
| 10/27/2010 02:38:00 | 27.5 | 6/27/2011 16:46:01 | 23.137 |
| 10/27/2010 03:13:00 | 27.5 | 6/27/2011 17:22:01 | 23.137 |
| 10/27/2010 03:48:00 | 27.5 | 6/27/2011 17:58:01 | 23.637 |
| 10/27/2010 04:23:00 | 27.5 | 6/27/2011 18:34:01 | 23.637 |
| 10/27/2010 04:58:00 | 27.0 | 6/27/2011 19:10:01 | 23.637 |
| 10/27/2010 05:33:00 | 27.0 | 6/27/2011 19:46:01 | 23.637 |
| 10/27/2010 06:08:00 | 27.0 | 6/27/2011 20:22:01 | 23.637 |
| 10/27/2010 06:43:00 | 27.0 | 6/27/2011 20:58:01 | 23.637 |
| 10/27/2010 07:18:00 | 27.0 | 6/27/2011 21:34:01 | 23.637 |
| 10/27/2010 07:53:00 | 27.0 | 6/27/2011 22:10:01 | 23.637 |
| 10/27/2010 08:28:00 | 27.0 | 6/27/2011 22:46:01 | 23.637 |
| 10/27/2010 09:03:00 | 27.0 | 6/27/2011 23:22:01 | 23.637 |
| 10/27/2010 09:38:00 | 27.0 | 6/27/2011 23:58:01 | 23.637 |
| 10/27/2010 10:13:00 | 27.0 | 6/28/2011 00:34:01 | 23.637 |
| 10/27/2010 10:48:00 | 27.0 | 6/28/2011 01:10:01 | 23.637 |
| 10/27/2010 11:23:00 | 27.0 | 6/28/2011 01:46:01 | 23.637 |
| 10/27/2010 11:58:00 | 27.0 | 6/28/2011 02:22:01 | 23.637 |
| 10/27/2010 12:33:00 | 27.0 | 6/28/2011 02:58:01 | 23.637 |
| 10/27/2010 13:08:00 | 27.5 | 6/28/2011 03:34:01 | 23.637 |
| 10/27/2010 13:43:00 | 27.5 | 6/28/2011 04:10:01 | 23.637 |
| 10/27/2010 14:18:00 | 27.5 | 6/28/2011 04:46:01 | 23.637 |
| 10/27/2010 14:53:00 | 27.5 | 6/28/2011 05:22:01 | 23.637 |
| 10/27/2010 15:28:00 | 27.5 | 6/28/2011 05:58:01 | 23.637 |
| 10/27/2010 16:03:00 | 27.5 | 6/28/2011 06:34:01 | 23.637 |
| 10/27/2010 16:38:00 | 27.5 | 6/28/2011 07:10:01 | 23.637 |
| 10/27/2010 17:13:00 | 27.5 | 6/28/2011 07:46:01 | 23.637 |
| 10/27/2010 17:48:00 | 27.5 | 6/28/2011 08:22:01 | 23.137 |
| 10/27/2010 18:23:00 | 27.5 | 6/28/2011 08:58:01 | 23.137 |
| 10/27/2010 18:58:00 | 27.5 | 6/28/2011 09:34:01 | 23.137 |
| 10/27/2010 19:33:00 | 27.5 | 6/28/2011 10:10:01 | 23.137 |
| 10/27/2010 20:08:00 | 27.5 | 6/28/2011 10:46:01 | 23.137 |
| 10/27/2010 20:43:00 | 27.5 | 6/28/2011 11:22:01 | 23.137 |
| 10/27/2010 21:18:00 | 27.5 | 6/28/2011 11:58:01 | 23.137 |
| 10/27/2010 21:53:00 | 27.5 | 6/28/2011 12:34:01 | 23.137 |
| 10/27/2010 22:28:00 | 27.5 | 6/28/2011 13:10:01 | 23.137 |
| 10/27/2010 23:03:00 | 27.5 | 6/28/2011 13:46:01 | 23.137 |
| 10/27/2010 23:38:00 | 27.5 | 6/28/2011 14:22:01 | 23.137 |
| 10/28/2010 00:13:00 | 27.5 | 6/28/2011 14:58:01 | 23.637 |
| 10/28/2010 00:48:00 | 27.5 | 6/28/2011 15:34:01 | 23.637 |
| 10/28/2010 01:23:00 | 27.5 | 6/28/2011 16:10:01 | 23.637 |
| 10/28/2010 01:58:00 | 27.5 | 6/28/2011 16:46:01 | 23.637 |
| 10/28/2010 02:33:00 | 27.5 | 6/28/2011 17:22:01 | 23.137 |
| 10/28/2010 03:08:00 | 27.5 | 6/28/2011 17:58:01 | 23.637 |
| 10/28/2010 03:43:00 | 27.5 | 6/28/2011 18:34:01 | 23.137 |
| 10/28/2010 04:18:00 | 27.5 | 6/28/2011 19:10:01 | 23.137 |

|                     |      |                    |        |
|---------------------|------|--------------------|--------|
| 10/28/2010 04:53:00 | 27.5 | 6/28/2011 19:46:01 | 23.137 |
| 10/28/2010 05:28:00 | 27.5 | 6/28/2011 20:22:01 | 23.137 |
| 10/28/2010 06:03:00 | 27.5 | 6/28/2011 20:58:01 | 23.137 |
| 10/28/2010 06:38:00 | 27.5 | 6/28/2011 21:34:01 | 23.637 |
| 10/28/2010 07:13:00 | 27.5 | 6/28/2011 22:10:01 | 23.637 |
| 10/28/2010 07:48:00 | 27.5 | 6/28/2011 22:46:01 | 23.137 |
| 10/28/2010 08:23:00 | 27.5 | 6/28/2011 23:22:01 | 23.637 |
| 10/28/2010 08:58:00 | 27.5 | 6/28/2011 23:58:01 | 23.637 |
| 10/28/2010 09:33:00 | 27.5 | 6/29/2011 00:34:01 | 23.637 |
| 10/28/2010 10:08:00 | 27.5 | 6/29/2011 01:10:01 | 23.637 |
| 10/28/2010 10:43:00 | 27.5 | 6/29/2011 01:46:01 | 23.637 |
| 10/28/2010 11:18:00 | 27.5 | 6/29/2011 02:22:01 | 23.637 |
| 10/28/2010 11:53:00 | 27.5 | 6/29/2011 02:58:01 | 23.637 |
| 10/28/2010 12:28:00 | 27.5 | 6/29/2011 03:34:01 | 23.637 |
| 10/28/2010 13:03:00 | 27.5 | 6/29/2011 04:10:01 | 23.637 |
| 10/28/2010 13:38:00 | 27.5 | 6/29/2011 04:46:01 | 23.637 |
| 10/28/2010 14:13:00 | 27.5 | 6/29/2011 05:22:01 | 23.637 |
| 10/28/2010 14:48:00 | 27.5 | 6/29/2011 05:58:01 | 23.637 |
| 10/28/2010 15:23:00 | 28.0 | 6/29/2011 06:34:01 | 23.637 |
| 10/28/2010 15:58:00 | 28.0 | 6/29/2011 07:10:01 | 23.637 |
| 10/28/2010 16:33:00 | 28.0 | 6/29/2011 07:46:01 | 23.637 |
| 10/28/2010 17:08:00 | 28.0 | 6/29/2011 08:22:01 | 23.637 |
| 10/28/2010 17:43:00 | 28.0 | 6/29/2011 08:58:01 | 23.637 |
| 10/28/2010 18:18:00 | 28.0 | 6/29/2011 09:34:01 | 23.637 |
| 10/28/2010 18:53:00 | 28.0 | 6/29/2011 10:10:01 | 23.637 |
| 10/28/2010 19:28:00 | 28.0 | 6/29/2011 10:46:01 | 23.637 |
| 10/28/2010 20:03:00 | 28.0 | 6/29/2011 11:22:01 | 23.637 |
| 10/28/2010 20:38:00 | 28.0 | 6/29/2011 11:58:01 | 23.637 |
| 10/28/2010 21:13:00 | 28.0 | 6/29/2011 12:34:01 | 23.637 |
| 10/28/2010 21:48:00 | 28.0 | 6/29/2011 13:10:01 | 23.637 |
| 10/28/2010 22:23:00 | 28.0 | 6/29/2011 13:46:01 | 23.637 |
| 10/28/2010 22:58:00 | 28.0 | 6/29/2011 14:22:01 | 23.637 |
| 10/28/2010 23:33:00 | 28.0 | 6/29/2011 14:58:01 | 23.637 |
| 10/29/2010 00:08:00 | 28.0 | 6/29/2011 15:34:01 | 23.637 |
| 10/29/2010 00:43:00 | 28.0 | 6/29/2011 16:10:01 | 23.637 |
| 10/29/2010 01:18:00 | 28.0 | 6/29/2011 16:46:01 | 23.637 |
| 10/29/2010 01:53:00 | 28.0 | 6/29/2011 17:22:01 | 23.637 |
| 10/29/2010 02:28:00 | 28.0 | 6/29/2011 17:58:01 | 23.637 |
| 10/29/2010 03:03:00 | 28.0 | 6/29/2011 18:34:01 | 23.637 |
| 10/29/2010 03:38:00 | 28.0 | 6/29/2011 19:10:01 | 23.637 |
| 10/29/2010 04:13:00 | 28.0 | 6/29/2011 19:46:01 | 23.637 |
| 10/29/2010 04:48:00 | 28.0 | 6/29/2011 20:22:01 | 23.637 |
| 10/29/2010 05:23:00 | 27.5 | 6/29/2011 20:58:01 | 23.637 |
| 10/29/2010 05:58:00 | 27.5 | 6/29/2011 21:34:01 | 23.637 |
| 10/29/2010 06:33:00 | 27.5 | 6/29/2011 22:10:01 | 23.637 |
| 10/29/2010 07:08:00 | 27.5 | 6/29/2011 22:46:01 | 23.637 |
| 10/29/2010 07:43:00 | 27.5 | 6/29/2011 23:22:01 | 23.637 |
| 10/29/2010 08:18:00 | 27.5 | 6/29/2011 23:58:01 | 23.637 |
| 10/29/2010 08:53:00 | 27.5 | 6/30/2011 00:34:01 | 23.637 |
| 10/29/2010 09:28:00 | 27.5 | 6/30/2011 01:10:01 | 23.637 |



|                     |      |                    |        |
|---------------------|------|--------------------|--------|
| 10/29/2010 10:03:00 | 27.5 | 6/30/2011 01:46:01 | 23.637 |
| 10/29/2010 10:38:00 | 27.5 | 6/30/2011 02:22:01 | 23.637 |
| 10/29/2010 11:13:00 | 27.5 | 6/30/2011 02:58:01 | 23.637 |
| 10/29/2010 11:48:00 | 27.5 | 6/30/2011 03:34:01 | 23.637 |
| 10/29/2010 12:23:00 | 27.5 | 6/30/2011 04:10:01 | 23.637 |
| 10/29/2010 12:58:00 | 27.5 | 6/30/2011 04:46:01 | 23.637 |
| 10/29/2010 13:33:00 | 28.0 | 6/30/2011 05:22:01 | 23.637 |
| 10/29/2010 14:08:00 | 28.0 | 6/30/2011 05:58:01 | 23.637 |
| 10/29/2010 14:43:00 | 28.0 | 6/30/2011 06:34:01 | 23.637 |
| 10/29/2010 15:18:00 | 28.0 | 6/30/2011 07:10:01 | 23.637 |
| 10/29/2010 15:53:00 | 28.0 | 6/30/2011 07:46:01 | 23.637 |
| 10/29/2010 16:28:00 | 28.0 | 6/30/2011 08:22:01 | 23.637 |
| 10/29/2010 17:03:00 | 28.0 | 6/30/2011 08:58:01 | 23.637 |
| 10/29/2010 17:38:00 | 28.0 | 6/30/2011 09:34:01 | 23.637 |
| 10/29/2010 18:13:00 | 28.0 | 6/30/2011 10:10:01 | 23.637 |
| 10/29/2010 18:48:00 | 28.0 | 6/30/2011 10:46:01 | 23.637 |
| 10/29/2010 19:23:00 | 28.0 | 6/30/2011 11:22:01 | 23.637 |
| 10/29/2010 19:58:00 | 28.0 | 6/30/2011 11:58:01 | 23.637 |
| 10/29/2010 20:33:00 | 28.0 | 6/30/2011 12:34:01 | 23.637 |
| 10/29/2010 21:08:00 | 28.0 | 6/30/2011 13:10:01 | 23.637 |
| 10/29/2010 21:43:00 | 28.0 | 6/30/2011 13:46:01 | 23.637 |
| 10/29/2010 22:18:00 | 28.0 | 6/30/2011 14:22:01 | 23.637 |
| 10/29/2010 22:53:00 | 28.0 | 6/30/2011 14:58:01 | 23.637 |
| 10/29/2010 23:28:00 | 28.0 | 6/30/2011 15:34:01 | 23.637 |
| 10/30/2010 00:03:00 | 28.0 | 6/30/2011 16:10:01 | 23.637 |
| 10/30/2010 00:38:00 | 28.0 | 6/30/2011 16:46:01 | 23.637 |
| 10/30/2010 01:13:00 | 28.0 | 6/30/2011 17:22:01 | 23.637 |
| 10/30/2010 01:48:00 | 28.0 | 6/30/2011 17:58:01 | 23.637 |
| 10/30/2010 02:23:00 | 28.0 | 6/30/2011 18:34:01 | 23.637 |
| 10/30/2010 02:58:00 | 28.0 | 6/30/2011 19:10:01 | 23.637 |
| 10/30/2010 03:33:00 | 28.0 | 6/30/2011 19:46:01 | 23.637 |
| 10/30/2010 04:08:00 | 28.0 | 6/30/2011 20:22:01 | 23.637 |
| 10/30/2010 04:43:00 | 28.0 | 6/30/2011 20:58:01 | 23.637 |
| 10/30/2010 05:18:00 | 28.0 | 6/30/2011 21:34:01 | 23.637 |
| 10/30/2010 05:53:00 | 28.0 | 6/30/2011 22:10:01 | 23.637 |
| 10/30/2010 06:28:00 | 28.0 | 6/30/2011 22:46:01 | 23.637 |
| 10/30/2010 07:03:00 | 28.0 | 6/30/2011 23:22:01 | 23.637 |
| 10/30/2010 07:38:00 | 28.0 | 6/30/2011 23:58:01 | 23.637 |
| 10/30/2010 08:13:00 | 28.0 | 7/1/2011 00:34:01  | 23.637 |
| 10/30/2010 08:48:00 | 27.5 | 7/1/2011 01:10:01  | 23.637 |
| 10/30/2010 09:23:00 | 27.5 | 7/1/2011 01:46:01  | 23.637 |
| 10/30/2010 09:58:00 | 27.5 | 7/1/2011 02:22:01  | 23.637 |
| 10/30/2010 10:33:00 | 27.5 | 7/1/2011 02:58:01  | 23.637 |
| 10/30/2010 11:08:00 | 27.5 | 7/1/2011 03:34:01  | 23.637 |
| 10/30/2010 11:43:00 | 27.5 | 7/1/2011 04:10:01  | 23.637 |
| 10/30/2010 12:18:00 | 28.0 | 7/1/2011 04:46:01  | 23.637 |
| 10/30/2010 12:53:00 | 28.0 | 7/1/2011 05:22:01  | 23.637 |
| 10/30/2010 13:28:00 | 28.0 | 7/1/2011 05:58:01  | 23.637 |
| 10/30/2010 14:03:00 | 28.0 | 7/1/2011 06:34:01  | 23.637 |
| 10/30/2010 14:38:00 | 28.0 | 7/1/2011 07:10:01  | 23.637 |

|                     |      |                   |        |
|---------------------|------|-------------------|--------|
| 10/30/2010 15:13:00 | 28.0 | 7/1/2011 07:46:01 | 23.637 |
| 10/30/2010 15:48:00 | 28.0 | 7/1/2011 08:22:01 | 23.637 |
| 10/30/2010 16:23:00 | 28.0 | 7/1/2011 08:58:01 | 23.637 |
| 10/30/2010 16:58:00 | 28.0 | 7/1/2011 09:34:01 | 23.637 |
| 10/30/2010 17:33:00 | 28.0 | 7/1/2011 10:10:01 | 23.637 |
| 10/30/2010 18:08:00 | 28.0 | 7/1/2011 10:46:01 | 23.637 |
| 10/30/2010 18:43:00 | 28.0 | 7/1/2011 11:22:01 | 23.637 |
| 10/30/2010 19:18:00 | 28.5 | 7/1/2011 11:58:01 | 23.637 |
| 10/30/2010 19:53:00 | 28.5 | 7/1/2011 12:34:01 | 23.637 |
| 10/30/2010 20:28:00 | 28.0 | 7/1/2011 13:10:01 | 23.637 |
| 10/30/2010 21:03:00 | 28.0 | 7/1/2011 13:46:01 | 23.637 |
| 10/30/2010 21:38:00 | 28.0 | 7/1/2011 14:22:01 | 23.637 |
| 10/30/2010 22:13:00 | 28.0 | 7/1/2011 14:58:01 | 23.637 |
| 10/30/2010 22:48:00 | 28.0 | 7/1/2011 15:34:01 | 23.637 |
| 10/30/2010 23:23:00 | 28.0 | 7/1/2011 16:10:01 | 23.637 |
| 10/30/2010 23:58:00 | 28.0 | 7/1/2011 16:46:01 | 23.637 |
| 10/31/2010 00:33:00 | 28.5 | 7/1/2011 17:22:01 | 23.637 |
| 10/31/2010 01:08:00 | 28.0 | 7/1/2011 17:58:01 | 23.637 |
| 10/31/2010 01:43:00 | 28.0 | 7/1/2011 18:34:01 | 23.637 |
| 10/31/2010 02:18:00 | 28.0 | 7/1/2011 19:10:01 | 23.637 |
| 10/31/2010 02:53:00 | 28.0 | 7/1/2011 19:46:01 | 23.637 |
| 10/31/2010 03:28:00 | 28.0 | 7/1/2011 20:22:01 | 23.637 |
| 10/31/2010 04:03:00 | 28.0 | 7/1/2011 20:58:01 | 23.637 |
| 10/31/2010 04:38:00 | 28.0 | 7/1/2011 21:34:01 | 23.637 |
| 10/31/2010 05:13:00 | 28.0 | 7/1/2011 22:10:01 | 23.637 |
| 10/31/2010 05:48:00 | 28.0 | 7/1/2011 22:46:01 | 23.637 |
| 10/31/2010 06:23:00 | 28.0 | 7/1/2011 23:22:01 | 23.637 |
| 10/31/2010 06:58:00 | 28.0 | 7/1/2011 23:58:01 | 23.637 |
| 10/31/2010 07:33:00 | 28.0 | 7/2/2011 00:34:01 | 23.637 |
| 10/31/2010 08:08:00 | 28.0 | 7/2/2011 01:10:01 | 23.637 |
| 10/31/2010 08:43:00 | 27.5 | 7/2/2011 01:46:01 | 23.637 |
| 10/31/2010 09:18:00 | 27.5 | 7/2/2011 02:22:01 | 23.637 |
| 10/31/2010 09:53:00 | 27.5 | 7/2/2011 02:58:01 | 24.137 |
| 10/31/2010 10:28:00 | 27.5 | 7/2/2011 03:34:01 | 24.137 |
| 10/31/2010 11:03:00 | 27.5 | 7/2/2011 04:10:01 | 24.137 |
| 10/31/2010 11:38:00 | 27.5 | 7/2/2011 04:46:01 | 24.137 |
| 10/31/2010 12:13:00 | 28.0 | 7/2/2011 05:22:01 | 24.137 |
| 10/31/2010 12:48:00 | 28.0 | 7/2/2011 05:58:01 | 24.137 |
| 10/31/2010 13:23:00 | 28.0 | 7/2/2011 06:34:01 | 23.637 |
| 10/31/2010 13:58:00 | 28.0 | 7/2/2011 07:10:01 | 23.637 |
| 10/31/2010 14:33:00 | 28.0 | 7/2/2011 07:46:01 | 23.637 |
| 10/31/2010 15:08:00 | 28.0 | 7/2/2011 08:22:01 | 23.637 |
| 10/31/2010 15:43:00 | 28.0 | 7/2/2011 08:58:01 | 23.637 |
| 10/31/2010 16:18:00 | 28.0 | 7/2/2011 09:34:01 | 23.637 |
| 10/31/2010 16:53:00 | 28.0 | 7/2/2011 10:10:01 | 23.637 |
| 10/31/2010 17:28:00 | 28.0 | 7/2/2011 10:46:01 | 23.637 |
| 10/31/2010 18:03:00 | 28.5 | 7/2/2011 11:22:01 | 23.637 |
| 10/31/2010 18:38:00 | 28.5 | 7/2/2011 11:58:01 | 23.637 |
| 10/31/2010 19:13:00 | 28.5 | 7/2/2011 12:34:01 | 23.637 |
| 10/31/2010 19:48:00 | 28.0 | 7/2/2011 13:10:01 | 23.637 |

|                     |      |                   |        |
|---------------------|------|-------------------|--------|
| 10/31/2010 20:23:00 | 28.0 | 7/2/2011 13:46:01 | 23.637 |
| 10/31/2010 20:58:00 | 28.0 | 7/2/2011 14:22:01 | 23.637 |
| 10/31/2010 21:33:00 | 28.0 | 7/2/2011 14:58:01 | 23.637 |
| 10/31/2010 22:08:00 | 28.0 | 7/2/2011 15:34:01 | 23.637 |
| 10/31/2010 22:43:00 | 28.0 | 7/2/2011 16:10:01 | 23.637 |
| 10/31/2010 23:18:00 | 28.0 | 7/2/2011 16:46:01 | 23.637 |
| 10/31/2010 23:53:00 | 28.0 | 7/2/2011 17:22:01 | 23.637 |
| 11/1/2010 00:28:00  | 28.0 | 7/2/2011 17:58:01 | 23.637 |
| 11/1/2010 01:03:00  | 28.0 | 7/2/2011 18:34:01 | 23.637 |
| 11/1/2010 01:38:00  | 28.0 | 7/2/2011 19:10:01 | 23.637 |
| 11/1/2010 02:13:00  | 28.0 | 7/2/2011 19:46:01 | 23.637 |
| 11/1/2010 02:48:00  | 28.0 | 7/2/2011 20:22:01 | 23.637 |
| 11/1/2010 03:23:00  | 28.0 | 7/2/2011 20:58:01 | 23.637 |
| 11/1/2010 03:58:00  | 28.0 | 7/2/2011 21:34:01 | 23.637 |
| 11/1/2010 04:33:00  | 28.0 | 7/2/2011 22:10:01 | 23.637 |
| 11/1/2010 05:08:00  | 28.0 | 7/2/2011 22:46:01 | 23.637 |
| 11/1/2010 05:43:00  | 28.0 | 7/2/2011 23:22:01 | 23.637 |
| 11/1/2010 06:18:00  | 27.5 | 7/2/2011 23:58:01 | 23.637 |
| 11/1/2010 06:53:00  | 27.5 | 7/3/2011 00:34:01 | 23.637 |
| 11/1/2010 07:28:00  | 27.5 | 7/3/2011 01:10:01 | 23.637 |
| 11/1/2010 08:03:00  | 27.5 | 7/3/2011 01:46:01 | 23.637 |
| 11/1/2010 08:38:00  | 27.5 | 7/3/2011 02:22:01 | 23.637 |
| 11/1/2010 09:13:00  | 27.5 | 7/3/2011 02:58:01 | 23.637 |
| 11/1/2010 09:48:00  | 27.5 | 7/3/2011 03:34:01 | 23.637 |
| 11/1/2010 10:23:00  | 27.5 | 7/3/2011 04:10:01 | 23.637 |
| 11/1/2010 10:58:00  | 27.5 | 7/3/2011 04:46:01 | 23.637 |
| 11/1/2010 11:33:00  | 27.5 | 7/3/2011 05:22:01 | 23.637 |
| 11/1/2010 12:08:00  | 27.5 | 7/3/2011 05:58:01 | 23.637 |
| 11/1/2010 12:43:00  | 28.0 | 7/3/2011 06:34:01 | 23.637 |
| 11/1/2010 13:18:00  | 28.0 | 7/3/2011 07:10:01 | 23.637 |
| 11/1/2010 13:53:00  | 28.0 | 7/3/2011 07:46:01 | 23.637 |
| 11/1/2010 14:28:00  | 28.0 | 7/3/2011 08:22:01 | 23.637 |
| 11/1/2010 15:03:00  | 28.0 | 7/3/2011 08:58:01 | 23.637 |
| 11/1/2010 15:38:00  | 28.0 | 7/3/2011 09:34:01 | 23.637 |
| 11/1/2010 16:13:00  | 28.0 | 7/3/2011 10:10:01 | 23.637 |
| 11/1/2010 16:48:00  | 28.0 | 7/3/2011 10:46:01 | 23.637 |
| 11/1/2010 17:23:00  | 28.0 | 7/3/2011 11:22:01 | 23.637 |
| 11/1/2010 17:58:00  | 28.0 | 7/3/2011 11:58:01 | 23.137 |
| 11/1/2010 18:33:00  | 28.0 | 7/3/2011 12:34:01 | 23.137 |
| 11/1/2010 19:08:00  | 28.0 | 7/3/2011 13:10:01 | 23.137 |
| 11/1/2010 19:43:00  | 28.0 | 7/3/2011 13:46:01 | 23.137 |
| 11/1/2010 20:18:00  | 28.0 | 7/3/2011 14:22:01 | 23.137 |
| 11/1/2010 20:53:00  | 28.0 | 7/3/2011 14:58:01 | 23.137 |
| 11/1/2010 21:28:00  | 28.0 | 7/3/2011 15:34:01 | 23.137 |
| 11/1/2010 22:03:00  | 28.0 | 7/3/2011 16:10:01 | 23.137 |
| 11/1/2010 22:38:00  | 28.0 | 7/3/2011 16:46:01 | 23.137 |
| 11/1/2010 23:13:00  | 28.0 | 7/3/2011 17:22:01 | 23.137 |
| 11/1/2010 23:48:00  | 28.0 | 7/3/2011 17:58:01 | 23.137 |
| 11/2/2010 00:23:00  | 28.0 | 7/3/2011 18:34:01 | 23.137 |
| 11/2/2010 00:58:00  | 28.0 | 7/3/2011 19:10:01 | 23.137 |

|                    |      |                   |        |
|--------------------|------|-------------------|--------|
| 11/2/2010 01:33:00 | 28.0 | 7/3/2011 19:46:01 | 23.137 |
| 11/2/2010 02:08:00 | 28.0 | 7/3/2011 20:22:01 | 23.137 |
| 11/2/2010 02:43:00 | 28.0 | 7/3/2011 20:58:01 | 23.137 |
| 11/2/2010 03:18:00 | 28.0 | 7/3/2011 21:34:01 | 23.137 |
| 11/2/2010 03:53:00 | 28.0 | 7/3/2011 22:10:01 | 23.137 |
| 11/2/2010 04:28:00 | 28.0 | 7/3/2011 22:46:01 | 23.137 |
| 11/2/2010 05:03:00 | 28.0 | 7/3/2011 23:22:01 | 23.137 |
| 11/2/2010 05:38:00 | 27.5 | 7/3/2011 23:58:01 | 23.137 |
| 11/2/2010 06:13:00 | 27.5 | 7/4/2011 00:34:01 | 23.137 |
| 11/2/2010 06:48:00 | 27.5 | 7/4/2011 01:10:01 | 23.137 |
| 11/2/2010 07:23:00 | 27.5 | 7/4/2011 01:46:01 | 23.137 |
| 11/2/2010 07:58:00 | 27.5 | 7/4/2011 02:22:01 | 23.137 |
| 11/2/2010 08:33:00 | 27.5 | 7/4/2011 02:58:01 | 23.137 |
| 11/2/2010 09:08:00 | 27.5 | 7/4/2011 03:34:01 | 23.137 |
| 11/2/2010 09:43:00 | 27.5 | 7/4/2011 04:10:01 | 23.137 |
| 11/2/2010 10:18:00 | 27.5 | 7/4/2011 04:46:01 | 23.137 |
| 11/2/2010 10:53:00 | 27.5 | 7/4/2011 05:22:01 | 23.137 |
| 11/2/2010 11:28:00 | 27.5 | 7/4/2011 05:58:01 | 23.137 |
| 11/2/2010 12:03:00 | 27.5 | 7/4/2011 06:34:01 | 23.137 |
| 11/2/2010 12:38:00 | 27.5 | 7/4/2011 07:10:01 | 23.137 |
| 11/2/2010 13:13:00 | 28.0 | 7/4/2011 07:46:01 | 23.137 |
| 11/2/2010 13:48:00 | 28.0 | 7/4/2011 08:22:01 | 23.137 |
| 11/2/2010 14:23:00 | 28.0 | 7/4/2011 08:58:01 | 23.137 |
| 11/2/2010 14:58:00 | 28.0 | 7/4/2011 09:34:01 | 23.137 |
| 11/2/2010 15:33:00 | 28.0 | 7/4/2011 10:10:01 | 23.137 |
| 11/2/2010 16:08:00 | 28.0 | 7/4/2011 10:46:01 | 23.137 |
| 11/2/2010 16:43:00 | 28.0 | 7/4/2011 11:22:01 | 23.137 |
| 11/2/2010 17:18:00 | 28.0 | 7/4/2011 11:58:01 | 23.137 |
| 11/2/2010 17:53:00 | 28.0 | 7/4/2011 12:34:01 | 23.137 |
| 11/2/2010 18:28:00 | 28.0 | 7/4/2011 13:10:01 | 23.137 |
| 11/2/2010 19:03:00 | 28.0 | 7/4/2011 13:46:01 | 23.137 |
| 11/2/2010 19:38:00 | 28.0 | 7/4/2011 14:22:01 | 23.137 |
| 11/2/2010 20:13:00 | 28.0 | 7/4/2011 14:58:01 | 23.137 |
| 11/2/2010 20:48:00 | 28.0 | 7/4/2011 15:34:01 | 23.137 |
| 11/2/2010 21:23:00 | 28.0 | 7/4/2011 16:10:01 | 23.137 |
| 11/2/2010 21:58:00 | 28.0 | 7/4/2011 16:46:01 | 23.137 |
| 11/2/2010 22:33:00 | 28.0 | 7/4/2011 17:22:01 | 23.137 |
| 11/2/2010 23:08:00 | 28.0 | 7/4/2011 17:58:01 | 23.137 |
| 11/2/2010 23:43:00 | 28.0 | 7/4/2011 18:34:01 | 23.137 |
| 11/3/2010 00:18:00 | 28.0 | 7/4/2011 19:10:01 | 23.137 |
| 11/3/2010 00:53:00 | 28.0 | 7/4/2011 19:46:01 | 23.137 |
| 11/3/2010 01:28:00 | 28.0 | 7/4/2011 20:22:01 | 23.137 |
| 11/3/2010 02:03:00 | 28.0 | 7/4/2011 20:58:01 | 23.137 |
| 11/3/2010 02:38:00 | 28.0 | 7/4/2011 21:34:01 | 23.137 |
| 11/3/2010 03:13:00 | 28.0 | 7/4/2011 22:10:01 | 23.137 |
| 11/3/2010 03:48:00 | 28.0 | 7/4/2011 22:46:01 | 23.137 |
| 11/3/2010 04:23:00 | 28.0 | 7/4/2011 23:22:01 | 23.137 |
| 11/3/2010 04:58:00 | 28.0 | 7/4/2011 23:58:01 | 23.137 |
| 11/3/2010 05:33:00 | 28.0 | 7/5/2011 00:34:01 | 23.137 |
| 11/3/2010 06:08:00 | 27.5 | 7/5/2011 01:10:01 | 23.137 |

|                    |      |                   |        |
|--------------------|------|-------------------|--------|
| 11/3/2010 06:43:00 | 27.5 | 7/5/2011 01:46:01 | 23.137 |
| 11/3/2010 07:18:00 | 27.5 | 7/5/2011 02:22:01 | 23.137 |
| 11/3/2010 07:53:00 | 27.5 | 7/5/2011 02:58:01 | 23.137 |
| 11/3/2010 08:28:00 | 27.5 | 7/5/2011 03:34:01 | 23.137 |
| 11/3/2010 09:03:00 | 27.5 | 7/5/2011 04:10:01 | 23.137 |
| 11/3/2010 09:38:00 | 27.5 | 7/5/2011 04:46:01 | 23.137 |
| 11/3/2010 10:13:00 | 27.5 | 7/5/2011 05:22:01 | 23.137 |
| 11/3/2010 10:48:00 | 27.5 | 7/5/2011 05:58:01 | 23.137 |
| 11/3/2010 11:23:00 | 27.5 | 7/5/2011 06:34:01 | 23.137 |
| 11/3/2010 11:58:00 | 27.5 | 7/5/2011 07:10:01 | 23.137 |
| 11/3/2010 12:33:00 | 28.0 | 7/5/2011 07:46:01 | 23.137 |
| 11/3/2010 13:08:00 | 28.0 | 7/5/2011 08:22:01 | 23.137 |
| 11/3/2010 13:43:00 | 28.0 | 7/5/2011 08:58:01 | 23.137 |
| 11/3/2010 14:18:00 | 28.0 | 7/5/2011 09:34:01 | 23.137 |
| 11/3/2010 14:53:00 | 28.0 | 7/5/2011 10:10:01 | 23.137 |
| 11/3/2010 15:28:00 | 28.0 | 7/5/2011 10:46:01 | 23.137 |
| 11/3/2010 16:03:00 | 28.0 | 7/5/2011 11:22:01 | 23.137 |
| 11/3/2010 16:38:00 | 28.0 | 7/5/2011 11:58:01 | 23.137 |
| 11/3/2010 17:13:00 | 28.0 | 7/5/2011 12:34:01 | 23.137 |
| 11/3/2010 17:48:00 | 28.0 | 7/5/2011 13:10:01 | 23.137 |
| 11/3/2010 18:23:00 | 28.0 | 7/5/2011 13:46:01 | 23.137 |
| 11/3/2010 18:58:00 | 28.0 | 7/5/2011 14:22:01 | 23.137 |
| 11/3/2010 19:33:00 | 28.0 | 7/5/2011 14:58:01 | 23.137 |
| 11/3/2010 20:08:00 | 28.0 | 7/5/2011 15:34:01 | 22.636 |
| 11/3/2010 20:43:00 | 28.0 | 7/5/2011 16:10:01 | 23.137 |
| 11/3/2010 21:18:00 | 28.0 | 7/5/2011 16:46:01 | 23.137 |
| 11/3/2010 21:53:00 | 28.0 | 7/5/2011 17:22:01 | 23.137 |
| 11/3/2010 22:28:00 | 28.0 | 7/5/2011 17:58:01 | 23.137 |
| 11/3/2010 23:03:00 | 28.0 | 7/5/2011 18:34:01 | 23.137 |
| 11/3/2010 23:38:00 | 28.0 | 7/5/2011 19:10:01 | 23.137 |
| 11/4/2010 00:13:00 | 28.0 | 7/5/2011 19:46:01 | 23.137 |
| 11/4/2010 00:48:00 | 28.0 | 7/5/2011 20:22:01 | 23.137 |
| 11/4/2010 01:23:00 | 28.0 | 7/5/2011 20:58:01 | 23.137 |
| 11/4/2010 01:58:00 | 28.0 | 7/5/2011 21:34:01 | 23.137 |
| 11/4/2010 02:33:00 | 28.0 | 7/5/2011 22:10:01 | 23.137 |
| 11/4/2010 03:08:00 | 28.0 | 7/5/2011 22:46:01 | 23.137 |
| 11/4/2010 03:43:00 | 27.5 | 7/5/2011 23:22:01 | 23.137 |
| 11/4/2010 04:18:00 | 27.5 | 7/5/2011 23:58:01 | 23.137 |
| 11/4/2010 04:53:00 | 27.5 | 7/6/2011 00:34:01 | 23.137 |
| 11/4/2010 05:28:00 | 27.5 | 7/6/2011 01:10:01 | 23.137 |
| 11/4/2010 06:03:00 | 27.5 | 7/6/2011 01:46:01 | 23.137 |
| 11/4/2010 06:38:00 | 27.5 | 7/6/2011 02:22:01 | 23.137 |
| 11/4/2010 07:13:00 | 27.5 | 7/6/2011 02:58:01 | 23.137 |
| 11/4/2010 07:48:00 | 27.5 | 7/6/2011 03:34:01 | 23.137 |
| 11/4/2010 08:23:00 | 27.5 | 7/6/2011 04:10:01 | 23.137 |
| 11/4/2010 08:58:00 | 27.5 | 7/6/2011 04:46:01 | 23.137 |
| 11/4/2010 09:33:00 | 27.5 | 7/6/2011 05:22:01 | 23.137 |
| 11/4/2010 10:08:00 | 27.5 | 7/6/2011 05:58:01 | 23.137 |
| 11/4/2010 10:43:00 | 27.5 | 7/6/2011 06:34:01 | 23.137 |
| 11/4/2010 11:18:00 | 27.5 | 7/6/2011 07:10:01 | 23.137 |

|                    |      |                   |        |
|--------------------|------|-------------------|--------|
| 11/4/2010 11:53:00 | 27.5 | 7/6/2011 07:46:01 | 23.137 |
| 11/4/2010 12:28:00 | 27.5 | 7/6/2011 08:22:01 | 23.137 |
| 11/4/2010 13:03:00 | 27.5 | 7/6/2011 08:58:01 | 23.137 |
| 11/4/2010 13:38:00 | 27.5 | 7/6/2011 09:34:01 | 23.137 |
| 11/4/2010 14:13:00 | 27.5 | 7/6/2011 10:10:01 | 23.137 |
| 11/4/2010 14:48:00 | 27.5 | 7/6/2011 10:46:01 | 23.137 |
| 11/4/2010 15:23:00 | 27.5 | 7/6/2011 11:22:01 | 23.137 |
| 11/4/2010 15:58:00 | 27.5 | 7/6/2011 11:58:01 | 23.137 |
| 11/4/2010 16:33:00 | 27.5 | 7/6/2011 12:34:01 | 23.137 |
| 11/4/2010 17:08:00 | 27.5 | 7/6/2011 13:10:01 | 23.137 |
| 11/4/2010 17:43:00 | 27.5 | 7/6/2011 13:46:01 | 23.137 |
| 11/4/2010 18:18:00 | 27.5 | 7/6/2011 14:22:01 | 23.137 |
| 11/4/2010 18:53:00 | 27.5 | 7/6/2011 14:58:01 | 23.137 |
| 11/4/2010 19:28:00 | 28.0 | 7/6/2011 15:34:01 | 23.137 |
| 11/4/2010 20:03:00 | 28.0 | 7/6/2011 16:10:01 | 23.137 |
| 11/4/2010 20:38:00 | 28.0 | 7/6/2011 16:46:01 | 23.137 |
| 11/4/2010 21:13:00 | 28.0 | 7/6/2011 17:22:01 | 23.137 |
| 11/4/2010 21:48:00 | 28.0 | 7/6/2011 17:58:01 | 23.137 |
| 11/4/2010 22:23:00 | 28.0 | 7/6/2011 18:34:01 | 23.137 |
| 11/4/2010 22:58:00 | 27.5 | 7/6/2011 19:10:01 | 23.137 |
| 11/4/2010 23:33:00 | 27.5 | 7/6/2011 19:46:01 | 23.137 |
| 11/5/2010 00:08:00 | 27.5 | 7/6/2011 20:22:01 | 23.137 |
| 11/5/2010 00:43:00 | 27.5 | 7/6/2011 20:58:01 | 23.137 |
| 11/5/2010 01:18:00 | 27.5 | 7/6/2011 21:34:01 | 23.137 |
| 11/5/2010 01:53:00 | 27.5 | 7/6/2011 22:10:01 | 23.137 |
| 11/5/2010 02:28:00 | 27.5 | 7/6/2011 22:46:01 | 23.137 |
| 11/5/2010 03:03:00 | 27.5 | 7/6/2011 23:22:01 | 23.137 |
| 11/5/2010 03:38:00 | 27.5 | 7/6/2011 23:58:01 | 23.137 |
| 11/5/2010 04:13:00 | 27.5 | 7/7/2011 00:34:01 | 23.137 |
| 11/5/2010 04:48:00 | 27.5 | 7/7/2011 01:10:01 | 23.137 |
| 11/5/2010 05:23:00 | 27.5 | 7/7/2011 01:46:01 | 23.137 |
| 11/5/2010 05:58:00 | 27.5 | 7/7/2011 02:22:01 | 23.137 |
| 11/5/2010 06:33:00 | 27.5 | 7/7/2011 02:58:01 | 23.137 |
| 11/5/2010 07:08:00 | 27.5 | 7/7/2011 03:34:01 | 23.137 |
| 11/5/2010 07:43:00 | 27.5 | 7/7/2011 04:10:01 | 23.137 |
| 11/5/2010 08:18:00 | 27.0 | 7/7/2011 04:46:01 | 23.137 |
| 11/5/2010 08:53:00 | 27.0 | 7/7/2011 05:22:01 | 23.137 |
| 11/5/2010 09:28:00 | 27.0 | 7/7/2011 05:58:01 | 23.137 |
| 11/5/2010 10:03:00 | 27.0 | 7/7/2011 06:34:01 | 23.137 |
| 11/5/2010 10:38:00 | 27.0 | 7/7/2011 07:10:01 | 23.137 |
| 11/5/2010 11:13:00 | 27.0 | 7/7/2011 07:46:01 | 23.137 |
| 11/5/2010 11:48:00 | 27.0 | 7/7/2011 08:22:01 | 23.137 |
| 11/5/2010 12:23:00 | 27.5 | 7/7/2011 08:58:01 | 23.137 |
| 11/5/2010 12:58:00 | 27.5 | 7/7/2011 09:34:01 | 23.137 |
| 11/5/2010 13:33:00 | 27.5 | 7/7/2011 10:10:01 | 23.137 |
| 11/5/2010 14:08:00 | 27.5 | 7/7/2011 10:46:01 | 23.137 |
| 11/5/2010 14:43:00 | 27.5 | 7/7/2011 11:22:01 | 23.137 |
| 11/5/2010 15:18:00 | 27.5 | 7/7/2011 11:58:01 | 23.137 |
| 11/5/2010 15:53:00 | 27.5 | 7/7/2011 12:34:01 | 23.137 |
| 11/5/2010 16:28:00 | 27.5 | 7/7/2011 13:10:01 | 23.137 |

|                    |      |                   |        |
|--------------------|------|-------------------|--------|
| 11/5/2010 17:03:00 | 27.5 | 7/7/2011 13:46:01 | 23.137 |
| 11/5/2010 17:38:00 | 27.5 | 7/7/2011 14:22:01 | 23.137 |
| 11/5/2010 18:13:00 | 27.5 | 7/7/2011 14:58:01 | 23.137 |
| 11/5/2010 18:48:00 | 27.5 | 7/7/2011 15:34:01 | 23.137 |
| 11/5/2010 19:23:00 | 28.0 | 7/7/2011 16:10:01 | 23.137 |
| 11/5/2010 19:58:00 | 28.0 | 7/7/2011 16:46:01 | 23.137 |
| 11/5/2010 20:33:00 | 27.5 | 7/7/2011 17:22:01 | 23.137 |
| 11/5/2010 21:08:00 | 27.5 | 7/7/2011 17:58:01 | 23.137 |
| 11/5/2010 21:43:00 | 28.0 | 7/7/2011 18:34:01 | 23.137 |
| 11/5/2010 22:18:00 | 28.0 | 7/7/2011 19:10:01 | 23.137 |
| 11/5/2010 22:53:00 | 28.0 | 7/7/2011 19:46:01 | 23.137 |
| 11/5/2010 23:28:00 | 27.5 | 7/7/2011 20:22:01 | 23.137 |
| 11/6/2010 00:03:00 | 27.5 | 7/7/2011 20:58:01 | 23.137 |
| 11/6/2010 00:38:00 | 27.5 | 7/7/2011 21:34:01 | 23.137 |
| 11/6/2010 01:13:00 | 27.5 | 7/7/2011 22:10:01 | 23.137 |
| 11/6/2010 01:48:00 | 27.5 | 7/7/2011 22:46:01 | 23.137 |
| 11/6/2010 02:23:00 | 27.5 | 7/7/2011 23:22:01 | 23.137 |
| 11/6/2010 02:58:00 | 27.5 | 7/7/2011 23:58:01 | 23.137 |
| 11/6/2010 03:33:00 | 27.5 | 7/8/2011 00:34:01 | 23.137 |
| 11/6/2010 04:08:00 | 27.5 | 7/8/2011 01:10:01 | 23.137 |
| 11/6/2010 04:43:00 | 27.5 | 7/8/2011 01:46:01 | 23.137 |
| 11/6/2010 05:18:00 | 27.5 | 7/8/2011 02:22:01 | 23.137 |
| 11/6/2010 05:53:00 | 27.5 | 7/8/2011 02:58:01 | 23.137 |
| 11/6/2010 06:28:00 | 27.5 | 7/8/2011 03:34:01 | 23.137 |
| 11/6/2010 07:03:00 | 27.5 | 7/8/2011 04:10:01 | 23.137 |
| 11/6/2010 07:38:00 | 27.5 | 7/8/2011 04:46:01 | 23.137 |
| 11/6/2010 08:13:00 | 27.5 | 7/8/2011 05:22:01 | 23.137 |
| 11/6/2010 08:48:00 | 27.5 | 7/8/2011 05:58:01 | 23.137 |
| 11/6/2010 09:23:00 | 27.0 | 7/8/2011 06:34:01 | 23.137 |
| 11/6/2010 09:58:00 | 27.5 | 7/8/2011 07:10:01 | 23.137 |
| 11/6/2010 10:33:00 | 27.5 | 7/8/2011 07:46:01 | 23.137 |
| 11/6/2010 11:08:00 | 27.5 | 7/8/2011 08:22:01 | 23.137 |
| 11/6/2010 11:43:00 | 27.5 | 7/8/2011 08:58:01 | 23.137 |
| 11/6/2010 12:18:00 | 27.5 | 7/8/2011 09:34:01 | 23.137 |
| 11/6/2010 12:53:00 | 27.5 | 7/8/2011 10:10:01 | 23.137 |
| 11/6/2010 13:28:00 | 27.5 | 7/8/2011 10:46:01 | 23.137 |
| 11/6/2010 14:03:00 | 27.5 | 7/8/2011 11:22:01 | 23.137 |
| 11/6/2010 14:38:00 | 27.5 | 7/8/2011 11:58:01 | 23.137 |
| 11/6/2010 15:13:00 | 27.5 | 7/8/2011 12:34:01 | 23.137 |
| 11/6/2010 15:48:00 | 27.5 | 7/8/2011 13:10:01 | 23.137 |
| 11/6/2010 16:23:00 | 27.5 | 7/8/2011 13:46:01 | 23.137 |
| 11/6/2010 16:58:00 | 27.5 | 7/8/2011 14:22:01 | 23.137 |
| 11/6/2010 17:33:00 | 28.0 | 7/8/2011 14:58:01 | 22.636 |
| 11/6/2010 18:08:00 | 28.0 | 7/8/2011 15:34:01 | 22.636 |
| 11/6/2010 18:43:00 | 28.0 | 7/8/2011 16:10:01 | 22.636 |
| 11/6/2010 19:18:00 | 28.0 | 7/8/2011 16:46:01 | 22.636 |
| 11/6/2010 19:53:00 | 28.0 | 7/8/2011 17:22:01 | 22.636 |
| 11/6/2010 20:28:00 | 28.0 | 7/8/2011 17:58:01 | 22.636 |
| 11/6/2010 21:03:00 | 28.0 | 7/8/2011 18:34:01 | 22.636 |
| 11/6/2010 21:38:00 | 28.0 | 7/8/2011 19:10:01 | 22.636 |

|                    |      |                    |        |
|--------------------|------|--------------------|--------|
| 11/6/2010 22:13:00 | 28.0 | 7/8/2011 19:46:01  | 22.636 |
| 11/6/2010 22:48:00 | 28.0 | 7/8/2011 20:22:01  | 22.636 |
| 11/6/2010 23:23:00 | 28.0 | 7/8/2011 20:58:01  | 22.636 |
| 11/6/2010 23:58:00 | 28.0 | 7/8/2011 21:34:01  | 22.636 |
| 11/7/2010 00:33:00 | 28.0 | 7/8/2011 22:10:01  | 23.137 |
| 11/7/2010 01:08:00 | 28.0 | 7/8/2011 22:46:01  | 23.137 |
| 11/7/2010 01:43:00 | 28.0 | 7/8/2011 23:22:01  | 23.137 |
| 11/7/2010 02:18:00 | 28.0 | 7/8/2011 23:58:01  | 23.137 |
| 11/7/2010 02:53:00 | 28.0 | 7/9/2011 00:34:01  | 23.137 |
| 11/7/2010 03:28:00 | 28.0 | 7/9/2011 01:10:01  | 23.137 |
| 11/7/2010 04:03:00 | 28.0 | 7/9/2011 01:46:01  | 23.137 |
| 11/7/2010 04:38:00 | 28.0 | 7/9/2011 02:22:01  | 23.137 |
| 11/7/2010 05:13:00 | 28.0 | 7/9/2011 02:58:01  | 23.137 |
| 11/7/2010 05:48:00 | 28.0 | 7/9/2011 03:34:01  | 23.137 |
| 11/7/2010 06:23:00 | 28.0 | 7/9/2011 04:10:01  | 23.137 |
| 11/7/2010 06:58:00 | 28.0 | 7/9/2011 04:46:01  | 22.636 |
| 11/7/2010 07:33:00 | 27.5 | 7/9/2011 05:22:01  | 22.636 |
| 11/7/2010 08:08:00 | 27.5 | 7/9/2011 05:58:01  | 22.636 |
| 11/7/2010 08:43:00 | 27.5 | 7/9/2011 06:34:01  | 22.636 |
| 11/7/2010 09:18:00 | 27.5 | 7/9/2011 07:10:01  | 22.636 |
| 11/7/2010 09:53:00 | 27.5 | 7/9/2011 07:46:01  | 22.636 |
| 11/7/2010 10:28:00 | 27.5 | 7/9/2011 08:22:01  | 22.636 |
| 11/7/2010 11:03:00 | 27.5 | 7/9/2011 08:58:01  | 22.636 |
| 11/7/2010 11:38:00 | 27.5 | 7/9/2011 09:34:01  | 22.636 |
| 11/7/2010 12:13:00 | 27.5 | 7/9/2011 10:10:01  | 22.636 |
| 11/7/2010 12:48:00 | 28.0 | 7/9/2011 10:46:01  | 22.636 |
| 11/7/2010 13:23:00 | 28.0 | 7/9/2011 11:22:01  | 22.636 |
| 11/7/2010 13:58:00 | 28.0 | 7/9/2011 11:58:01  | 22.636 |
| 11/7/2010 14:33:00 | 28.0 | 7/9/2011 12:34:01  | 22.636 |
| 11/7/2010 15:08:00 | 28.0 | 7/9/2011 13:10:01  | 22.636 |
| 11/7/2010 15:43:00 | 28.0 | 7/9/2011 13:46:01  | 22.636 |
| 11/7/2010 16:18:00 | 28.0 | 7/9/2011 14:22:01  | 22.636 |
| 11/7/2010 16:53:00 | 28.0 | 7/9/2011 14:58:01  | 22.636 |
| 11/7/2010 17:28:00 | 28.0 | 7/9/2011 15:34:01  | 22.636 |
| 11/7/2010 18:03:00 | 28.0 | 7/9/2011 16:10:01  | 22.636 |
| 11/7/2010 18:38:00 | 28.0 | 7/9/2011 16:46:01  | 22.636 |
| 11/7/2010 19:13:00 | 28.0 | 7/9/2011 17:22:01  | 22.636 |
| 11/7/2010 19:48:00 | 28.0 | 7/9/2011 17:58:01  | 22.636 |
| 11/7/2010 20:23:00 | 28.0 | 7/9/2011 18:34:01  | 22.636 |
| 11/7/2010 20:58:00 | 28.0 | 7/9/2011 19:10:01  | 22.636 |
| 11/7/2010 21:33:00 | 28.0 | 7/9/2011 19:46:01  | 22.636 |
| 11/7/2010 22:08:00 | 28.0 | 7/9/2011 20:22:01  | 22.636 |
| 11/7/2010 22:43:00 | 28.0 | 7/9/2011 20:58:01  | 22.636 |
| 11/7/2010 23:18:00 | 28.0 | 7/9/2011 21:34:01  | 22.636 |
| 11/7/2010 23:53:00 | 28.0 | 7/9/2011 22:10:01  | 22.636 |
| 11/8/2010 00:28:00 | 28.0 | 7/9/2011 22:46:01  | 22.636 |
| 11/8/2010 01:03:00 | 28.0 | 7/9/2011 23:22:01  | 22.636 |
| 11/8/2010 01:38:00 | 28.0 | 7/9/2011 23:58:01  | 22.636 |
| 11/8/2010 02:13:00 | 28.0 | 7/10/2011 00:34:01 | 23.137 |
| 11/8/2010 02:48:00 | 28.0 | 7/10/2011 01:10:01 | 22.636 |



|                    |      |                    |        |
|--------------------|------|--------------------|--------|
| 11/8/2010 03:23:00 | 28.0 | 7/10/2011 01:46:01 | 22.636 |
| 11/8/2010 03:58:00 | 28.0 | 7/10/2011 02:22:01 | 22.636 |
| 11/8/2010 04:33:00 | 28.0 | 7/10/2011 02:58:01 | 23.137 |
| 11/8/2010 05:08:00 | 28.0 | 7/10/2011 03:34:01 | 23.137 |
| 11/8/2010 05:43:00 | 28.0 | 7/10/2011 04:10:01 | 23.137 |
| 11/8/2010 06:18:00 | 28.0 | 7/10/2011 04:46:01 | 23.137 |
| 11/8/2010 06:53:00 | 28.0 | 7/10/2011 05:22:01 | 22.636 |
| 11/8/2010 07:28:00 | 28.0 | 7/10/2011 05:58:01 | 22.636 |
| 11/8/2010 08:03:00 | 27.5 | 7/10/2011 06:34:01 | 22.636 |
| 11/8/2010 08:38:00 | 27.5 | 7/10/2011 07:10:01 | 23.137 |
| 11/8/2010 09:13:00 | 27.5 | 7/10/2011 07:46:01 | 22.636 |
| 11/8/2010 09:48:00 | 27.5 | 7/10/2011 08:22:01 | 22.636 |
| 11/8/2010 10:23:00 | 27.5 | 7/10/2011 08:58:01 | 22.636 |
| 11/8/2010 10:58:00 | 27.5 | 7/10/2011 09:34:01 | 22.636 |
| 11/8/2010 11:33:00 | 27.5 | 7/10/2011 10:10:01 | 22.636 |
| 11/8/2010 12:08:00 | 27.5 | 7/10/2011 10:46:01 | 22.636 |
| 11/8/2010 12:43:00 | 27.5 | 7/10/2011 11:22:01 | 22.636 |
| 11/8/2010 13:18:00 | 27.5 | 7/10/2011 11:58:01 | 22.636 |
| 11/8/2010 13:53:00 | 28.0 | 7/10/2011 12:34:01 | 22.636 |
| 11/8/2010 14:28:00 | 28.0 | 7/10/2011 13:10:01 | 22.636 |
| 11/8/2010 15:03:00 | 28.0 | 7/10/2011 13:46:01 | 22.636 |
| 11/8/2010 15:38:00 | 28.0 | 7/10/2011 14:22:01 | 22.636 |
| 11/8/2010 16:13:00 | 28.0 | 7/10/2011 14:58:01 | 22.636 |
| 11/8/2010 16:48:00 | 28.0 | 7/10/2011 15:34:01 | 22.636 |
| 11/8/2010 17:23:00 | 28.0 | 7/10/2011 16:10:01 | 22.636 |
| 11/8/2010 17:58:00 | 28.0 | 7/10/2011 16:46:01 | 22.636 |
| 11/8/2010 18:33:00 | 28.0 | 7/10/2011 17:22:01 | 22.636 |
| 11/8/2010 19:08:00 | 28.0 | 7/10/2011 17:58:01 | 22.636 |
| 11/8/2010 19:43:00 | 28.0 | 7/10/2011 18:34:01 | 22.636 |
| 11/8/2010 20:18:00 | 28.0 | 7/10/2011 19:10:01 | 22.636 |
| 11/8/2010 20:53:00 | 28.0 | 7/10/2011 19:46:01 | 22.636 |
| 11/8/2010 21:28:00 | 28.0 | 7/10/2011 20:22:01 | 22.636 |
| 11/8/2010 22:03:00 | 28.0 | 7/10/2011 20:58:01 | 22.636 |
| 11/8/2010 22:38:00 | 28.0 | 7/10/2011 21:34:01 | 23.137 |
| 11/8/2010 23:13:00 | 28.0 | 7/10/2011 22:10:01 | 23.137 |
| 11/8/2010 23:48:00 | 28.0 | 7/10/2011 22:46:01 | 23.137 |
| 11/9/2010 00:23:00 | 28.0 | 7/10/2011 23:22:01 | 23.137 |
| 11/9/2010 00:58:00 | 28.0 | 7/10/2011 23:58:01 | 23.137 |
| 11/9/2010 01:33:00 | 28.0 | 7/11/2011 00:34:01 | 23.137 |
| 11/9/2010 02:08:00 | 28.0 | 7/11/2011 01:10:01 | 23.137 |
| 11/9/2010 02:43:00 | 28.0 | 7/11/2011 01:46:01 | 23.137 |
| 11/9/2010 03:18:00 | 28.0 | 7/11/2011 02:22:01 | 23.137 |
| 11/9/2010 03:53:00 | 28.0 | 7/11/2011 02:58:01 | 23.137 |
| 11/9/2010 04:28:00 | 28.0 | 7/11/2011 03:34:01 | 23.137 |
| 11/9/2010 05:03:00 | 28.0 | 7/11/2011 04:10:01 | 23.137 |
| 11/9/2010 05:38:00 | 28.0 | 7/11/2011 04:46:01 | 23.137 |
| 11/9/2010 06:13:00 | 28.0 | 7/11/2011 05:22:01 | 23.137 |
| 11/9/2010 06:48:00 | 27.5 | 7/11/2011 05:58:01 | 23.137 |
| 11/9/2010 07:23:00 | 27.5 | 7/11/2011 06:34:01 | 23.137 |
| 11/9/2010 07:58:00 | 27.5 | 7/11/2011 07:10:01 | 23.137 |

|                     |      |                    |        |
|---------------------|------|--------------------|--------|
| 11/9/2010 08:33:00  | 27.5 | 7/11/2011 07:46:01 | 23.137 |
| 11/9/2010 09:08:00  | 27.5 | 7/11/2011 08:22:01 | 23.137 |
| 11/9/2010 09:43:00  | 27.5 | 7/11/2011 08:58:01 | 23.137 |
| 11/9/2010 10:18:00  | 27.5 | 7/11/2011 09:34:01 | 23.137 |
| 11/9/2010 10:53:00  | 27.5 | 7/11/2011 10:10:01 | 23.137 |
| 11/9/2010 11:28:00  | 27.5 | 7/11/2011 10:46:01 | 23.137 |
| 11/9/2010 12:03:00  | 27.5 | 7/11/2011 11:22:01 | 23.137 |
| 11/9/2010 12:38:00  | 27.5 | 7/11/2011 11:58:01 | 23.137 |
| 11/9/2010 13:13:00  | 28.0 | 7/11/2011 12:34:01 | 23.137 |
| 11/9/2010 13:48:00  | 28.0 | 7/11/2011 13:10:01 | 22.636 |
| 11/9/2010 14:23:00  | 28.0 | 7/11/2011 13:46:01 | 23.137 |
| 11/9/2010 14:58:00  | 28.0 | 7/11/2011 14:22:01 | 22.636 |
| 11/9/2010 15:33:00  | 28.0 | 7/11/2011 14:58:01 | 22.636 |
| 11/9/2010 16:08:00  | 28.0 | 7/11/2011 15:34:01 | 22.636 |
| 11/9/2010 16:43:00  | 28.0 | 7/11/2011 16:10:01 | 22.636 |
| 11/9/2010 17:18:00  | 28.0 | 7/11/2011 16:46:01 | 22.636 |
| 11/9/2010 17:53:00  | 28.0 | 7/11/2011 17:22:01 | 22.636 |
| 11/9/2010 18:28:00  | 28.0 | 7/11/2011 17:58:01 | 23.137 |
| 11/9/2010 19:03:00  | 28.0 | 7/11/2011 18:34:01 | 22.636 |
| 11/9/2010 19:38:00  | 28.0 | 7/11/2011 19:10:01 | 23.137 |
| 11/9/2010 20:13:00  | 28.0 | 7/11/2011 19:46:01 | 23.137 |
| 11/9/2010 20:48:00  | 28.0 | 7/11/2011 20:22:01 | 23.137 |
| 11/9/2010 21:23:00  | 28.0 | 7/11/2011 20:58:01 | 23.137 |
| 11/9/2010 21:58:00  | 28.0 | 7/11/2011 21:34:01 | 23.137 |
| 11/9/2010 22:33:00  | 28.0 | 7/11/2011 22:10:01 | 23.137 |
| 11/9/2010 23:08:00  | 28.0 | 7/11/2011 22:46:01 | 23.137 |
| 11/9/2010 23:43:00  | 28.0 | 7/11/2011 23:22:01 | 23.137 |
| 11/10/2010 00:18:00 | 28.0 | 7/11/2011 23:58:01 | 23.137 |
| 11/10/2010 00:53:00 | 28.0 | 7/12/2011 00:34:01 | 23.137 |
| 11/10/2010 01:28:00 | 28.0 | 7/12/2011 01:10:01 | 23.137 |
| 11/10/2010 02:03:00 | 28.0 | 7/12/2011 01:46:01 | 23.137 |
| 11/10/2010 02:38:00 | 28.0 | 7/12/2011 02:22:01 | 23.137 |
| 11/10/2010 03:13:00 | 28.0 | 7/12/2011 02:58:01 | 23.137 |
| 11/10/2010 03:48:00 | 27.5 | 7/12/2011 03:34:01 | 23.137 |
| 11/10/2010 04:23:00 | 27.5 | 7/12/2011 04:10:01 | 23.137 |
| 11/10/2010 04:58:00 | 27.5 | 7/12/2011 04:46:01 | 23.137 |
| 11/10/2010 05:33:00 | 27.5 | 7/12/2011 05:22:01 | 23.137 |
| 11/10/2010 06:08:00 | 27.5 | 7/12/2011 05:58:01 | 23.137 |
| 11/10/2010 06:43:00 | 27.5 | 7/12/2011 06:34:01 | 23.137 |
| 11/10/2010 07:18:00 | 27.5 | 7/12/2011 07:10:01 | 23.137 |
| 11/10/2010 07:53:00 | 27.5 | 7/12/2011 07:46:01 | 23.137 |
| 11/10/2010 08:28:00 | 27.5 | 7/12/2011 08:22:01 | 23.137 |
| 11/10/2010 09:03:00 | 27.5 | 7/12/2011 08:58:01 | 23.137 |
| 11/10/2010 09:38:00 | 27.5 | 7/12/2011 09:34:01 | 23.137 |
| 11/10/2010 10:13:00 | 27.5 | 7/12/2011 10:10:01 | 23.137 |
| 11/10/2010 10:48:00 | 27.5 | 7/12/2011 10:46:01 | 23.137 |
| 11/10/2010 11:23:00 | 27.5 | 7/12/2011 11:22:01 | 23.137 |
| 11/10/2010 11:58:00 | 27.5 | 7/12/2011 11:58:01 | 23.137 |
| 11/10/2010 12:33:00 | 27.5 | 7/12/2011 12:34:01 | 22.636 |
| 11/10/2010 13:08:00 | 27.5 | 7/12/2011 13:10:01 | 22.636 |

|                     |      |                    |        |
|---------------------|------|--------------------|--------|
| 11/10/2010 13:43:00 | 27.5 | 7/12/2011 13:46:01 | 22.636 |
| 11/10/2010 14:18:00 | 27.5 | 7/12/2011 14:22:01 | 22.636 |
| 11/10/2010 14:53:00 | 27.5 | 7/12/2011 14:58:01 | 22.636 |
| 11/10/2010 15:28:00 | 27.5 | 7/12/2011 15:34:01 | 22.636 |
| 11/10/2010 16:03:00 | 27.5 | 7/12/2011 16:10:01 | 22.636 |
| 11/10/2010 16:38:00 | 28.0 | 7/12/2011 16:46:01 | 22.636 |
| 11/10/2010 17:13:00 | 28.0 | 7/12/2011 17:22:01 | 22.636 |
| 11/10/2010 17:48:00 | 28.0 | 7/12/2011 17:58:01 | 22.636 |
| 11/10/2010 18:23:00 | 28.0 | 7/12/2011 18:34:01 | 22.636 |
| 11/10/2010 18:58:00 | 28.0 | 7/12/2011 19:10:01 | 23.137 |
| 11/10/2010 19:33:00 | 28.0 | 7/12/2011 19:46:01 | 23.137 |
| 11/10/2010 20:08:00 | 28.0 | 7/12/2011 20:22:01 | 23.137 |
| 11/10/2010 20:43:00 | 28.0 | 7/12/2011 20:58:01 | 22.636 |
| 11/10/2010 21:18:00 | 28.0 | 7/12/2011 21:34:01 | 23.137 |
| 11/10/2010 21:53:00 | 28.0 | 7/12/2011 22:10:01 | 23.137 |
| 11/10/2010 22:28:00 | 28.0 | 7/12/2011 22:46:01 | 23.137 |
| 11/10/2010 23:03:00 | 28.0 | 7/12/2011 23:22:01 | 23.137 |
| 11/10/2010 23:38:00 | 28.0 | 7/12/2011 23:58:01 | 23.137 |
| 11/11/2010 00:13:00 | 28.0 | 7/13/2011 00:34:01 | 23.137 |
| 11/11/2010 00:48:00 | 28.0 | 7/13/2011 01:10:01 | 23.137 |
| 11/11/2010 01:23:00 | 28.0 | 7/13/2011 01:46:01 | 23.137 |
| 11/11/2010 01:58:00 | 28.0 | 7/13/2011 02:22:01 | 23.137 |
| 11/11/2010 02:33:00 | 28.0 | 7/13/2011 02:58:01 | 23.137 |
| 11/11/2010 03:08:00 | 28.0 | 7/13/2011 03:34:01 | 23.137 |
| 11/11/2010 03:43:00 | 28.0 | 7/13/2011 04:10:01 | 23.137 |
| 11/11/2010 04:18:00 | 28.0 | 7/13/2011 04:46:01 | 23.137 |
| 11/11/2010 04:53:00 | 27.5 | 7/13/2011 05:22:01 | 23.137 |
| 11/11/2010 05:28:00 | 27.5 | 7/13/2011 05:58:01 | 23.137 |
| 11/11/2010 06:03:00 | 27.5 | 7/13/2011 06:34:01 | 23.137 |
| 11/11/2010 06:38:00 | 27.5 | 7/13/2011 07:10:01 | 23.137 |
| 11/11/2010 07:13:00 | 27.5 | 7/13/2011 07:46:01 | 23.137 |
| 11/11/2010 07:48:00 | 27.5 | 7/13/2011 08:22:01 | 23.137 |
| 11/11/2010 08:23:00 | 27.5 | 7/13/2011 08:58:01 | 23.137 |
| 11/11/2010 08:58:00 | 27.5 | 7/13/2011 09:34:01 | 22.636 |
| 11/11/2010 09:33:00 | 27.5 | 7/13/2011 10:10:01 | 22.636 |
| 11/11/2010 10:08:00 | 27.5 | 7/13/2011 10:46:01 | 22.636 |
| 11/11/2010 10:43:00 | 27.5 | 7/13/2011 11:22:01 | 22.636 |
| 11/11/2010 11:18:00 | 27.5 | 7/13/2011 11:58:01 | 22.636 |
| 11/11/2010 11:53:00 | 27.5 | 7/13/2011 12:34:01 | 22.636 |
| 11/11/2010 12:28:00 | 27.5 | 7/13/2011 13:10:01 | 22.636 |
| 11/11/2010 13:03:00 | 27.5 | 7/13/2011 13:46:01 | 22.636 |
| 11/11/2010 13:38:00 | 27.5 | 7/13/2011 14:22:01 | 22.636 |
| 11/11/2010 14:13:00 | 27.5 | 7/13/2011 14:58:01 | 22.636 |
| 11/11/2010 14:48:00 | 27.5 | 7/13/2011 15:34:01 | 22.636 |
| 11/11/2010 15:23:00 | 27.5 | 7/13/2011 16:10:01 | 22.636 |
| 11/11/2010 15:58:00 | 28.0 | 7/13/2011 16:46:01 | 22.636 |
| 11/11/2010 16:33:00 | 28.0 | 7/13/2011 17:22:01 | 22.636 |
| 11/11/2010 17:08:00 | 28.0 | 7/13/2011 17:58:01 | 22.636 |
| 11/11/2010 17:43:00 | 28.0 | 7/13/2011 18:34:01 | 22.636 |
| 11/11/2010 18:18:00 | 28.0 | 7/13/2011 19:10:01 | 22.636 |

|                     |      |                    |        |
|---------------------|------|--------------------|--------|
| 11/11/2010 18:53:00 | 28.0 | 7/13/2011 19:46:01 | 22.636 |
| 11/11/2010 19:28:00 | 28.0 | 7/13/2011 20:22:01 | 22.636 |
| 11/11/2010 20:03:00 | 28.0 | 7/13/2011 20:58:01 | 22.636 |
| 11/11/2010 20:38:00 | 28.0 | 7/13/2011 21:34:01 | 22.636 |
| 11/11/2010 21:13:00 | 28.0 | 7/13/2011 22:10:01 | 22.636 |
| 11/11/2010 21:48:00 | 28.0 | 7/13/2011 22:46:01 | 22.636 |
| 11/11/2010 22:23:00 | 28.0 | 7/13/2011 23:22:01 | 22.636 |
| 11/11/2010 22:58:00 | 28.0 | 7/13/2011 23:58:01 | 22.636 |
| 11/11/2010 23:33:00 | 28.0 | 7/14/2011 00:34:01 | 22.636 |
| 11/12/2010 00:08:00 | 28.0 | 7/14/2011 01:10:01 | 22.636 |
| 11/12/2010 00:43:00 | 28.0 | 7/14/2011 01:46:01 | 22.636 |
| 11/12/2010 01:18:00 | 28.0 | 7/14/2011 02:22:01 | 23.137 |
| 11/12/2010 01:53:00 | 28.0 | 7/14/2011 02:58:01 | 23.137 |
| 11/12/2010 02:28:00 | 28.0 | 7/14/2011 03:34:01 | 23.137 |
| 11/12/2010 03:03:00 | 28.0 | 7/14/2011 04:10:01 | 23.137 |
| 11/12/2010 03:38:00 | 27.5 | 7/14/2011 04:46:01 | 23.137 |
| 11/12/2010 04:13:00 | 27.5 | 7/14/2011 05:22:01 | 23.137 |
| 11/12/2010 04:48:00 | 27.5 | 7/14/2011 05:58:01 | 23.137 |
| 11/12/2010 05:23:00 | 27.5 | 7/14/2011 06:34:01 | 23.137 |
| 11/12/2010 05:58:00 | 27.5 | 7/14/2011 07:10:01 | 23.137 |
| 11/12/2010 06:33:00 | 27.5 | 7/14/2011 07:46:01 | 22.636 |
| 11/12/2010 07:08:00 | 27.5 | 7/14/2011 08:22:01 | 22.636 |
| 11/12/2010 07:43:00 | 27.5 | 7/14/2011 08:58:01 | 22.636 |
| 11/12/2010 08:18:00 | 27.5 | 7/14/2011 09:34:01 | 22.636 |
| 11/12/2010 08:53:00 | 27.5 | 7/14/2011 10:10:01 | 22.636 |
| 11/12/2010 09:28:00 | 27.5 | 7/14/2011 10:46:01 | 22.636 |
| 11/12/2010 10:03:00 | 27.5 | 7/14/2011 11:22:01 | 22.636 |
| 11/12/2010 10:38:00 | 27.5 | 7/14/2011 11:58:01 | 22.636 |
| 11/12/2010 11:13:00 | 27.5 | 7/14/2011 12:34:01 | 22.636 |
| 11/12/2010 11:48:00 | 27.5 | 7/14/2011 13:10:01 | 22.636 |
| 11/12/2010 12:23:00 | 27.5 | 7/14/2011 13:46:01 | 22.636 |
| 11/12/2010 12:58:00 | 27.5 | 7/14/2011 14:22:01 | 22.636 |
| 11/12/2010 13:33:00 | 27.5 | 7/14/2011 14:58:01 | 22.636 |
| 11/12/2010 14:08:00 | 27.5 | 7/14/2011 15:34:01 | 22.636 |
| 11/12/2010 14:43:00 | 27.5 | 7/14/2011 16:10:01 | 22.636 |
| 11/12/2010 15:18:00 | 27.5 | 7/14/2011 16:46:01 | 22.636 |
| 11/12/2010 15:53:00 | 27.5 | 7/14/2011 17:22:01 | 22.636 |
| 11/12/2010 16:28:00 | 27.5 | 7/14/2011 17:58:01 | 22.636 |
| 11/12/2010 17:03:00 | 27.5 | 7/14/2011 18:34:01 | 22.636 |
| 11/12/2010 17:38:00 | 27.5 | 7/14/2011 19:10:01 | 22.636 |
| 11/12/2010 18:13:00 | 27.5 | 7/14/2011 19:46:01 | 22.636 |
| 11/12/2010 18:48:00 | 27.5 | 7/14/2011 20:22:01 | 22.636 |
| 11/12/2010 19:23:00 | 28.0 | 7/14/2011 20:58:01 | 22.636 |
| 11/12/2010 19:58:00 | 28.0 | 7/14/2011 21:34:01 | 22.636 |
| 11/12/2010 20:33:00 | 28.0 | 7/14/2011 22:10:01 | 22.636 |
| 11/12/2010 21:08:00 | 27.5 | 7/14/2011 22:46:01 | 22.636 |
| 11/12/2010 21:43:00 | 28.0 | 7/14/2011 23:22:01 | 22.636 |
| 11/12/2010 22:18:00 | 27.5 | 7/14/2011 23:58:01 | 22.636 |
| 11/12/2010 22:53:00 | 28.0 | 7/15/2011 00:34:01 | 22.636 |
| 11/12/2010 23:28:00 | 27.5 | 7/15/2011 01:10:01 | 22.636 |

|                     |      |                    |        |
|---------------------|------|--------------------|--------|
| 11/13/2010 00:03:00 | 27.5 | 7/15/2011 01:46:01 | 22.636 |
| 11/13/2010 00:38:00 | 27.5 | 7/15/2011 02:22:01 | 22.636 |
| 11/13/2010 01:13:00 | 27.5 | 7/15/2011 02:58:01 | 22.636 |
| 11/13/2010 01:48:00 | 27.5 | 7/15/2011 03:34:01 | 22.636 |
| 11/13/2010 02:23:00 | 27.5 | 7/15/2011 04:10:01 | 22.636 |
| 11/13/2010 02:58:00 | 27.5 | 7/15/2011 04:46:01 | 22.636 |
| 11/13/2010 03:33:00 | 27.5 | 7/15/2011 05:22:01 | 22.636 |
| 11/13/2010 04:08:00 | 27.5 | 7/15/2011 05:58:01 | 22.636 |
| 11/13/2010 04:43:00 | 27.5 | 7/15/2011 06:34:01 | 22.636 |
| 11/13/2010 05:18:00 | 27.5 | 7/15/2011 07:10:01 | 22.636 |
| 11/13/2010 05:53:00 | 27.5 | 7/15/2011 07:46:01 | 22.636 |
| 11/13/2010 06:28:00 | 27.5 | 7/15/2011 08:22:01 | 22.636 |
| 11/13/2010 07:03:00 | 27.0 | 7/15/2011 08:58:01 | 22.636 |
| 11/13/2010 07:38:00 | 27.5 | 7/15/2011 09:34:01 | 22.636 |
| 11/13/2010 08:13:00 | 27.0 | 7/15/2011 10:10:01 | 22.636 |
| 11/13/2010 08:48:00 | 27.0 | 7/15/2011 10:46:01 | 22.636 |
| 11/13/2010 09:23:00 | 27.0 | 7/15/2011 11:22:01 | 22.636 |
| 11/13/2010 09:58:00 | 27.0 | 7/15/2011 11:58:01 | 22.636 |
| 11/13/2010 10:33:00 | 27.0 | 7/15/2011 12:34:01 | 22.636 |
| 11/13/2010 11:08:00 | 27.0 | 7/15/2011 13:10:01 | 22.636 |
| 11/13/2010 11:43:00 | 27.0 | 7/15/2011 13:46:01 | 22.636 |
| 11/13/2010 12:18:00 | 27.5 | 7/15/2011 14:22:01 | 22.636 |
| 11/13/2010 12:53:00 | 27.0 | 7/15/2011 14:58:01 | 22.636 |
| 11/13/2010 13:28:00 | 27.5 | 7/15/2011 15:34:01 | 22.636 |
| 11/13/2010 14:03:00 | 27.5 | 7/15/2011 16:10:01 | 22.636 |
| 11/13/2010 14:38:00 | 27.5 | 7/15/2011 16:46:01 | 22.636 |
| 11/13/2010 15:13:00 | 27.5 | 7/15/2011 17:22:01 | 22.636 |
| 11/13/2010 15:48:00 | 27.5 | 7/15/2011 17:58:01 | 22.636 |
| 11/13/2010 16:23:00 | 27.5 | 7/15/2011 18:34:01 | 22.636 |
| 11/13/2010 16:58:00 | 27.5 | 7/15/2011 19:10:01 | 22.636 |
| 11/13/2010 17:33:00 | 27.5 | 7/15/2011 19:46:01 | 22.636 |
| 11/13/2010 18:08:00 | 28.0 | 7/15/2011 20:22:01 | 22.636 |
| 11/13/2010 18:43:00 | 28.0 | 7/15/2011 20:58:01 | 22.636 |
| 11/13/2010 19:18:00 | 28.0 | 7/15/2011 21:34:01 | 22.636 |
| 11/13/2010 19:53:00 | 28.0 | 7/15/2011 22:10:01 | 22.636 |
| 11/13/2010 20:28:00 | 28.0 | 7/15/2011 22:46:01 | 22.636 |
| 11/13/2010 21:03:00 | 28.0 | 7/15/2011 23:22:01 | 22.636 |
| 11/13/2010 21:38:00 | 28.0 | 7/15/2011 23:58:01 | 22.636 |
| 11/13/2010 22:13:00 | 28.0 | 7/16/2011 00:34:01 | 23.137 |
| 11/13/2010 22:48:00 | 28.0 | 7/16/2011 01:10:01 | 23.137 |
| 11/13/2010 23:23:00 | 28.0 | 7/16/2011 01:46:01 | 23.137 |
| 11/13/2010 23:58:00 | 28.0 | 7/16/2011 02:22:01 | 23.137 |
| 11/14/2010 00:33:00 | 28.0 | 7/16/2011 02:58:01 | 23.137 |
| 11/14/2010 01:08:00 | 28.0 | 7/16/2011 03:34:01 | 23.137 |
| 11/14/2010 01:43:00 | 28.0 | 7/16/2011 04:10:01 | 23.137 |
| 11/14/2010 02:18:00 | 28.0 | 7/16/2011 04:46:01 | 23.137 |
| 11/14/2010 02:53:00 | 28.0 | 7/16/2011 05:22:01 | 23.137 |
| 11/14/2010 03:28:00 | 28.0 | 7/16/2011 05:58:01 | 23.137 |
| 11/14/2010 04:03:00 | 28.0 | 7/16/2011 06:34:01 | 23.137 |
| 11/14/2010 04:38:00 | 28.0 | 7/16/2011 07:10:01 | 23.137 |

|                     |      |                    |        |
|---------------------|------|--------------------|--------|
| 11/14/2010 05:13:00 | 27.5 | 7/16/2011 07:46:01 | 23.137 |
| 11/14/2010 05:48:00 | 27.5 | 7/16/2011 08:22:01 | 23.137 |
| 11/14/2010 06:23:00 | 27.5 | 7/16/2011 08:58:01 | 23.137 |
| 11/14/2010 06:58:00 | 27.5 | 7/16/2011 09:34:01 | 23.137 |
| 11/14/2010 07:33:00 | 27.5 | 7/16/2011 10:10:01 | 23.137 |
| 11/14/2010 08:08:00 | 27.5 | 7/16/2011 10:46:01 | 23.137 |
| 11/14/2010 08:43:00 | 27.5 | 7/16/2011 11:22:01 | 23.137 |
| 11/14/2010 09:18:00 | 27.5 | 7/16/2011 11:58:01 | 22.636 |
| 11/14/2010 09:53:00 | 27.5 | 7/16/2011 12:34:01 | 22.636 |
| 11/14/2010 10:28:00 | 27.5 | 7/16/2011 13:10:01 | 23.137 |
| 11/14/2010 11:03:00 | 27.5 | 7/16/2011 13:46:01 | 23.137 |
| 11/14/2010 11:38:00 | 27.5 | 7/16/2011 14:22:01 | 23.137 |
| 11/14/2010 12:13:00 | 27.5 | 7/16/2011 14:58:01 | 23.137 |
| 11/14/2010 12:48:00 | 27.5 | 7/16/2011 15:34:01 | 23.137 |
| 11/14/2010 13:23:00 | 27.5 | 7/16/2011 16:10:01 | 23.137 |
| 11/14/2010 13:58:00 | 27.5 | 7/16/2011 16:46:01 | 23.137 |
| 11/14/2010 14:33:00 | 28.0 | 7/16/2011 17:22:01 | 23.137 |
| 11/14/2010 15:08:00 | 28.0 | 7/16/2011 17:58:01 | 23.137 |
| 11/14/2010 15:43:00 | 28.0 | 7/16/2011 18:34:01 | 23.137 |
| 11/14/2010 16:18:00 | 28.0 | 7/16/2011 19:10:01 | 23.137 |
| 11/14/2010 16:53:00 | 28.0 | 7/16/2011 19:46:01 | 23.137 |
| 11/14/2010 17:28:00 | 28.0 | 7/16/2011 20:22:01 | 23.137 |
| 11/14/2010 18:03:00 | 28.0 | 7/16/2011 20:58:01 | 23.137 |
| 11/14/2010 18:38:00 | 28.0 | 7/16/2011 21:34:01 | 23.137 |
| 11/14/2010 19:13:00 | 28.0 | 7/16/2011 22:10:01 | 23.137 |
| 11/14/2010 19:48:00 | 28.0 | 7/16/2011 22:46:01 | 23.137 |
| 11/14/2010 20:23:00 | 28.0 | 7/16/2011 23:22:01 | 23.137 |
| 11/14/2010 20:58:00 | 28.0 | 7/16/2011 23:58:01 | 23.137 |
| 11/14/2010 21:33:00 | 28.0 | 7/17/2011 00:34:01 | 23.137 |
| 11/14/2010 22:08:00 | 28.0 | 7/17/2011 01:10:01 | 23.137 |
| 11/14/2010 22:43:00 | 28.0 | 7/17/2011 01:46:01 | 23.137 |
| 11/14/2010 23:18:00 | 28.0 | 7/17/2011 02:22:01 | 23.137 |
| 11/14/2010 23:53:00 | 28.0 | 7/17/2011 02:58:01 | 23.137 |
| 11/15/2010 00:28:00 | 28.0 | 7/17/2011 03:34:01 | 23.137 |
| 11/15/2010 01:03:00 | 28.0 | 7/17/2011 04:10:01 | 23.137 |
| 11/15/2010 01:38:00 | 28.0 | 7/17/2011 04:46:01 | 23.137 |
| 11/15/2010 02:13:00 | 28.0 | 7/17/2011 05:22:01 | 23.137 |
| 11/15/2010 02:48:00 | 28.0 | 7/17/2011 05:58:01 | 23.137 |
| 11/15/2010 03:23:00 | 28.0 | 7/17/2011 06:34:01 | 23.137 |
| 11/15/2010 03:58:00 | 28.0 | 7/17/2011 07:10:01 | 23.137 |
| 11/15/2010 04:33:00 | 27.5 | 7/17/2011 07:46:01 | 23.137 |
| 11/15/2010 05:08:00 | 27.5 | 7/17/2011 08:22:01 | 23.137 |
| 11/15/2010 05:43:00 | 27.5 | 7/17/2011 08:58:01 | 23.137 |
| 11/15/2010 06:18:00 | 27.5 | 7/17/2011 09:34:01 | 23.137 |
| 11/15/2010 06:53:00 | 27.5 | 7/17/2011 10:10:01 | 23.137 |
| 11/15/2010 07:28:00 | 27.5 | 7/17/2011 10:46:01 | 23.137 |
| 11/15/2010 08:03:00 | 27.5 | 7/17/2011 11:22:01 | 23.137 |
| 11/15/2010 08:38:00 | 27.5 | 7/17/2011 11:58:01 | 23.137 |
| 11/15/2010 09:13:00 | 27.5 | 7/17/2011 12:34:01 | 23.137 |
| 11/15/2010 09:48:00 | 27.5 | 7/17/2011 13:10:01 | 23.137 |

|                     |      |                    |        |
|---------------------|------|--------------------|--------|
| 11/15/2010 10:23:00 | 27.5 | 7/17/2011 13:46:01 | 23.137 |
| 11/15/2010 10:58:00 | 27.5 | 7/17/2011 14:22:01 | 23.137 |
| 11/15/2010 11:33:00 | 27.5 | 7/17/2011 14:58:01 | 23.137 |
| 11/15/2010 12:08:00 | 27.5 | 7/17/2011 15:34:01 | 23.137 |
| 11/15/2010 12:43:00 | 27.5 | 7/17/2011 16:10:01 | 23.137 |
| 11/15/2010 13:18:00 | 27.5 | 7/17/2011 16:46:01 | 23.137 |
| 11/15/2010 13:53:00 | 27.5 | 7/17/2011 17:22:01 | 23.137 |
| 11/15/2010 14:28:00 | 27.5 | 7/17/2011 17:58:01 | 23.137 |
| 11/15/2010 15:03:00 | 27.5 | 7/17/2011 18:34:01 | 23.137 |
| 11/15/2010 15:38:00 | 28.0 | 7/17/2011 19:10:01 | 23.137 |
| 11/15/2010 16:13:00 | 28.0 | 7/17/2011 19:46:01 | 23.137 |
| 11/15/2010 16:48:00 | 28.0 | 7/17/2011 20:22:01 | 23.137 |
| 11/15/2010 17:23:00 | 28.0 | 7/17/2011 20:58:01 | 23.137 |
| 11/15/2010 17:58:00 | 28.0 | 7/17/2011 21:34:01 | 23.137 |
| 11/15/2010 18:33:00 | 28.0 | 7/17/2011 22:10:01 | 23.137 |
| 11/15/2010 19:08:00 | 28.0 | 7/17/2011 22:46:01 | 23.137 |
| 11/15/2010 19:43:00 | 28.0 | 7/17/2011 23:22:01 | 23.137 |
| 11/15/2010 20:18:00 | 28.0 | 7/17/2011 23:58:01 | 23.137 |
| 11/15/2010 20:53:00 | 28.0 | 7/18/2011 00:34:01 | 23.137 |
| 11/15/2010 21:28:00 | 28.0 | 7/18/2011 01:10:01 | 23.137 |
| 11/15/2010 22:03:00 | 28.0 | 7/18/2011 01:46:01 | 23.137 |
| 11/15/2010 22:38:00 | 28.0 | 7/18/2011 02:22:01 | 23.137 |
| 11/15/2010 23:13:00 | 28.0 | 7/18/2011 02:58:01 | 23.137 |
| 11/15/2010 23:48:00 | 28.0 | 7/18/2011 03:34:01 | 23.137 |
| 11/16/2010 00:23:00 | 28.0 | 7/18/2011 04:10:01 | 23.137 |
| 11/16/2010 00:58:00 | 28.0 | 7/18/2011 04:46:01 | 23.137 |
| 11/16/2010 01:33:00 | 28.0 | 7/18/2011 05:22:01 | 23.137 |
| 11/16/2010 02:08:00 | 28.0 | 7/18/2011 05:58:01 | 23.137 |
| 11/16/2010 02:43:00 | 28.0 | 7/18/2011 06:34:01 | 23.137 |
| 11/16/2010 03:18:00 | 28.0 | 7/18/2011 07:10:01 | 23.137 |
| 11/16/2010 03:53:00 | 28.0 | 7/18/2011 07:46:01 | 23.137 |
| 11/16/2010 04:28:00 | 28.0 | 7/18/2011 08:22:01 | 23.137 |
| 11/16/2010 05:03:00 | 28.0 | 7/18/2011 08:58:01 | 23.137 |
| 11/16/2010 05:38:00 | 28.0 | 7/18/2011 09:34:01 | 23.137 |
| 11/16/2010 06:13:00 | 28.0 | 7/18/2011 10:10:01 | 23.137 |
| 11/16/2010 06:48:00 | 27.5 | 7/18/2011 10:46:01 | 23.137 |
| 11/16/2010 07:23:00 | 27.5 | 7/18/2011 11:22:01 | 23.137 |
| 11/16/2010 07:58:00 | 28.0 | 7/18/2011 11:58:01 | 23.137 |
| 11/16/2010 08:33:00 | 28.0 | 7/18/2011 12:34:01 | 22.636 |
| 11/16/2010 09:08:00 | 28.0 | 7/18/2011 13:10:01 | 23.137 |
| 11/16/2010 09:43:00 | 27.5 | 7/18/2011 13:46:01 | 23.137 |
| 11/16/2010 10:18:00 | 27.5 | 7/18/2011 14:22:01 | 22.636 |
| 11/16/2010 10:53:00 | 27.5 | 7/18/2011 14:58:01 | 22.636 |
| 11/16/2010 11:28:00 | 27.5 | 7/18/2011 15:34:01 | 23.137 |
| 11/16/2010 12:03:00 | 27.5 | 7/18/2011 16:10:01 | 23.137 |
| 11/16/2010 12:38:00 | 28.0 | 7/18/2011 16:46:01 | 23.137 |
| 11/16/2010 13:13:00 | 27.5 | 7/18/2011 17:22:01 | 23.137 |
| 11/16/2010 13:48:00 | 28.0 | 7/18/2011 17:58:01 | 23.137 |
| 11/16/2010 14:23:00 | 28.0 | 7/18/2011 18:34:01 | 23.137 |
| 11/16/2010 14:58:00 | 28.0 | 7/18/2011 19:10:01 | 23.137 |

|                     |      |                    |        |
|---------------------|------|--------------------|--------|
| 11/16/2010 15:33:00 | 28.0 | 7/18/2011 19:46:01 | 23.137 |
| 11/16/2010 16:08:00 | 28.0 | 7/18/2011 20:22:01 | 23.137 |
| 11/16/2010 16:43:00 | 28.0 | 7/18/2011 20:58:01 | 23.137 |
| 11/16/2010 17:18:00 | 28.0 | 7/18/2011 21:34:01 | 23.137 |
| 11/16/2010 17:53:00 | 28.0 | 7/18/2011 22:10:01 | 23.137 |
| 11/16/2010 18:28:00 | 28.0 | 7/18/2011 22:46:01 | 23.137 |
| 11/16/2010 19:03:00 | 28.0 | 7/18/2011 23:22:01 | 23.137 |
| 11/16/2010 19:38:00 | 28.0 | 7/18/2011 23:58:01 | 23.137 |
| 11/16/2010 20:13:00 | 28.0 | 7/19/2011 00:34:01 | 23.137 |
| 11/16/2010 20:48:00 | 28.0 | 7/19/2011 01:10:01 | 23.137 |
| 11/16/2010 21:23:00 | 28.0 | 7/19/2011 01:46:01 | 23.137 |
| 11/16/2010 21:58:00 | 28.0 | 7/19/2011 02:22:01 | 23.137 |
| 11/16/2010 22:33:00 | 28.0 | 7/19/2011 02:58:01 | 23.137 |
| 11/16/2010 23:08:00 | 28.0 | 7/19/2011 03:34:01 | 23.137 |
| 11/16/2010 23:43:00 | 28.0 | 7/19/2011 04:10:01 | 23.137 |
| 11/17/2010 00:18:00 | 28.0 | 7/19/2011 04:46:01 | 23.137 |
| 11/17/2010 00:53:00 | 28.0 | 7/19/2011 05:22:01 | 23.137 |
| 11/17/2010 01:28:00 | 28.0 | 7/19/2011 05:58:01 | 23.137 |
| 11/17/2010 02:03:00 | 28.0 | 7/19/2011 06:34:01 | 23.137 |
| 11/17/2010 02:38:00 | 28.0 | 7/19/2011 07:10:01 | 23.137 |
| 11/17/2010 03:13:00 | 28.0 | 7/19/2011 07:46:01 | 23.137 |
| 11/17/2010 03:48:00 | 28.0 | 7/19/2011 08:22:01 | 23.137 |
| 11/17/2010 04:23:00 | 28.0 | 7/19/2011 08:58:01 | 23.137 |
| 11/17/2010 04:58:00 | 28.0 | 7/19/2011 09:34:01 | 23.137 |
| 11/17/2010 05:33:00 | 28.0 | 7/19/2011 10:10:01 | 23.137 |
| 11/17/2010 06:08:00 | 28.0 | 7/19/2011 10:46:01 | 23.137 |
| 11/17/2010 06:43:00 | 28.0 | 7/19/2011 11:22:01 | 23.137 |
| 11/17/2010 07:18:00 | 28.0 | 7/19/2011 11:58:01 | 23.137 |
| 11/17/2010 07:53:00 | 27.5 | 7/19/2011 12:34:01 | 23.137 |
| 11/17/2010 08:28:00 | 27.5 | 7/19/2011 13:10:01 | 23.137 |
| 11/17/2010 09:03:00 | 27.5 | 7/19/2011 13:46:01 | 23.137 |
| 11/17/2010 09:38:00 | 28.0 | 7/19/2011 14:22:01 | 23.137 |
| 11/17/2010 10:13:00 | 28.0 | 7/19/2011 14:58:01 | 22.636 |
| 11/17/2010 10:48:00 | 28.0 | 7/19/2011 15:34:01 | 22.636 |
| 11/17/2010 11:23:00 | 28.0 | 7/19/2011 16:10:01 | 22.636 |
| 11/17/2010 11:58:00 | 28.0 | 7/19/2011 16:46:01 | 22.636 |
| 11/17/2010 12:33:00 | 28.0 | 7/19/2011 17:22:01 | 22.636 |
| 11/17/2010 13:08:00 | 28.0 | 7/19/2011 17:58:01 | 22.636 |
| 11/17/2010 13:43:00 | 28.0 | 7/19/2011 18:34:01 | 23.137 |
| 11/17/2010 14:18:00 | 28.0 | 7/19/2011 19:10:01 | 22.636 |
| 11/17/2010 14:53:00 | 28.0 | 7/19/2011 19:46:01 | 23.137 |
| 11/17/2010 15:28:00 | 28.0 | 7/19/2011 20:22:01 | 23.137 |
| 11/17/2010 16:03:00 | 28.0 | 7/19/2011 20:58:01 | 23.137 |
| 11/17/2010 16:38:00 | 28.0 | 7/19/2011 21:34:01 | 23.137 |
| 11/17/2010 17:13:00 | 28.0 | 7/19/2011 22:10:01 | 23.137 |
| 11/17/2010 17:48:00 | 28.5 | 7/19/2011 22:46:01 | 23.137 |
| 11/17/2010 18:23:00 | 28.5 | 7/19/2011 23:22:01 | 23.137 |
| 11/17/2010 18:58:00 | 28.5 | 7/19/2011 23:58:01 | 23.137 |
| 11/17/2010 19:33:00 | 28.5 | 7/20/2011 00:34:01 | 23.137 |
| 11/17/2010 20:08:00 | 28.5 | 7/20/2011 01:10:01 | 23.137 |



|                     |      |                    |        |
|---------------------|------|--------------------|--------|
| 11/17/2010 20:43:00 | 28.5 | 7/20/2011 01:46:01 | 23.137 |
| 11/17/2010 21:18:00 | 28.5 | 7/20/2011 02:22:01 | 23.137 |
| 11/17/2010 21:53:00 | 28.5 | 7/20/2011 02:58:01 | 23.137 |
| 11/17/2010 22:28:00 | 28.5 | 7/20/2011 03:34:01 | 23.137 |
| 11/17/2010 23:03:00 | 28.5 | 7/20/2011 04:10:01 | 23.137 |
| 11/17/2010 23:38:00 | 28.5 | 7/20/2011 04:46:01 | 23.137 |
| 11/18/2010 00:13:00 | 28.5 | 7/20/2011 05:22:01 | 23.137 |
| 11/18/2010 00:48:00 | 28.5 | 7/20/2011 05:58:01 | 23.137 |
| 11/18/2010 01:23:00 | 28.5 | 7/20/2011 06:34:01 | 23.137 |
| 11/18/2010 01:58:00 | 28.5 | 7/20/2011 07:10:01 | 23.137 |
| 11/18/2010 02:33:00 | 29.0 | 7/20/2011 07:46:01 | 23.137 |
| 11/18/2010 03:08:00 | 29.0 | 7/20/2011 08:22:01 | 23.137 |
| 11/18/2010 03:43:00 | 29.0 | 7/20/2011 08:58:01 | 23.137 |
| 11/18/2010 04:18:00 | 28.5 | 7/20/2011 09:34:01 | 22.636 |
| 11/18/2010 04:53:00 | 28.5 | 7/20/2011 10:10:01 | 22.636 |
| 11/18/2010 05:28:00 | 28.5 | 7/20/2011 10:46:01 | 22.636 |
| 11/18/2010 06:03:00 | 28.5 | 7/20/2011 11:22:01 | 22.636 |
| 11/18/2010 06:38:00 | 28.5 | 7/20/2011 11:58:01 | 22.636 |
| 11/18/2010 07:13:00 | 28.5 | 7/20/2011 12:34:01 | 22.636 |
| 11/18/2010 07:48:00 | 28.5 | 7/20/2011 13:10:01 | 22.636 |
| 11/18/2010 08:23:00 | 28.0 | 7/20/2011 13:46:01 | 22.636 |
| 11/18/2010 08:58:00 | 28.0 | 7/20/2011 14:22:01 | 22.636 |
| 11/18/2010 09:33:00 | 28.0 | 7/20/2011 14:58:01 | 22.636 |
| 11/18/2010 10:08:00 | 28.0 | 7/20/2011 15:34:01 | 22.636 |
| 11/18/2010 10:43:00 | 28.0 | 7/20/2011 16:10:01 | 22.636 |
| 11/18/2010 11:18:00 | 28.0 | 7/20/2011 16:46:01 | 22.636 |
| 11/18/2010 11:53:00 | 28.0 | 7/20/2011 17:22:01 | 22.636 |
| 11/18/2010 12:28:00 | 28.0 | 7/20/2011 17:58:01 | 22.636 |
| 11/18/2010 13:03:00 | 28.5 | 7/20/2011 18:34:01 | 22.636 |
| 11/18/2010 13:38:00 | 28.5 | 7/20/2011 19:10:01 | 22.636 |
| 11/18/2010 14:13:00 | 28.5 | 7/20/2011 19:46:01 | 22.636 |
| 11/18/2010 14:48:00 | 28.5 | 7/20/2011 20:22:01 | 22.636 |
| 11/18/2010 15:23:00 | 28.5 | 7/20/2011 20:58:01 | 22.636 |
| 11/18/2010 15:58:00 | 29.0 | 7/20/2011 21:34:01 | 22.636 |
| 11/18/2010 16:33:00 | 30.0 | 7/20/2011 22:10:01 | 22.636 |
| 11/18/2010 17:08:00 | 30.0 | 7/20/2011 22:46:01 | 22.636 |
| 11/18/2010 17:43:00 | 30.0 | 7/20/2011 23:22:01 | 22.636 |
| 11/18/2010 18:18:00 | 30.5 | 7/20/2011 23:58:01 | 22.636 |
| 11/18/2010 18:53:00 | 30.0 | 7/21/2011 00:34:01 | 22.636 |
| 11/18/2010 19:28:00 | 29.5 | 7/21/2011 01:10:01 | 23.137 |
| 11/18/2010 20:03:00 | 30.0 | 7/21/2011 01:46:01 | 23.137 |
| 11/18/2010 20:38:00 | 29.5 | 7/21/2011 02:22:01 | 23.137 |
| 11/18/2010 21:13:00 | 29.5 | 7/21/2011 02:58:01 | 23.137 |
| 11/18/2010 21:48:00 | 29.5 | 7/21/2011 03:34:01 | 23.137 |
| 11/18/2010 22:23:00 | 29.0 | 7/21/2011 04:10:01 | 23.137 |
| 11/18/2010 22:58:00 | 29.0 | 7/21/2011 04:46:01 | 23.137 |
| 11/18/2010 23:33:00 | 29.0 | 7/21/2011 05:22:01 | 23.137 |
| 11/19/2010 00:08:00 | 29.0 | 7/21/2011 05:58:01 | 23.137 |
| 11/19/2010 00:43:00 | 29.0 | 7/21/2011 06:34:01 | 23.137 |
| 11/19/2010 01:18:00 | 28.0 | 7/21/2011 07:10:01 | 23.137 |

|                     |      |                    |        |
|---------------------|------|--------------------|--------|
| 11/19/2010 01:53:00 | 27.5 | 7/21/2011 07:46:01 | 23.137 |
| 11/19/2010 02:28:00 | 27.0 | 7/21/2011 08:22:01 | 23.137 |
| 11/19/2010 03:03:00 | 26.5 | 7/21/2011 08:58:01 | 23.137 |
| 11/19/2010 03:38:00 | 27.5 | 7/21/2011 09:34:01 | 23.137 |
| 11/19/2010 04:13:00 | 28.0 | 7/21/2011 10:10:01 | 23.137 |
| 11/19/2010 04:48:00 | 28.0 | 7/21/2011 10:46:01 | 23.137 |
| 11/19/2010 05:23:00 | 28.0 | 7/21/2011 11:22:01 | 23.137 |
| 11/19/2010 05:58:00 | 28.5 | 7/21/2011 11:58:01 | 22.636 |
| 11/19/2010 06:33:00 | 30.0 | 7/21/2011 12:34:01 | 22.636 |
| 11/19/2010 07:08:00 | 30.0 | 7/21/2011 13:10:01 | 22.636 |
| 11/19/2010 07:43:00 | 30.0 | 7/21/2011 13:46:01 | 22.636 |
| 11/19/2010 08:18:00 | 30.0 | 7/21/2011 14:22:01 | 22.636 |
| 11/19/2010 08:53:00 | 29.5 | 7/21/2011 14:58:01 | 22.636 |
| 11/19/2010 09:28:00 | 29.0 | 7/21/2011 15:34:01 | 22.636 |
| 11/19/2010 10:03:00 | 29.0 | 7/21/2011 16:10:01 | 22.636 |
| 11/19/2010 10:38:00 | 30.0 | 7/21/2011 16:46:01 | 22.636 |
| 11/19/2010 11:13:00 | 32.0 | 7/21/2011 17:22:01 | 22.636 |
| 11/19/2010 11:48:00 | 31.5 | 7/21/2011 17:58:01 | 22.636 |
| 11/19/2010 12:23:00 | 31.0 | 7/21/2011 18:34:01 | 22.636 |
| 11/19/2010 12:58:00 | 31.0 | 7/21/2011 19:10:01 | 22.636 |
| 11/19/2010 13:33:00 | 30.5 | 7/21/2011 19:46:01 | 22.636 |
| 11/19/2010 14:08:00 | 30.5 | 7/21/2011 20:22:01 | 22.636 |
| 11/19/2010 14:43:00 | 30.5 | 7/21/2011 20:58:01 | 23.137 |
| 11/19/2010 15:18:00 | 30.5 | 7/21/2011 21:34:01 | 23.137 |
| 11/19/2010 15:53:00 | 30.5 | 7/21/2011 22:10:01 | 23.137 |
| 11/19/2010 16:28:00 | 31.0 | 7/21/2011 22:46:01 | 23.137 |
| 11/19/2010 17:03:00 | 31.0 | 7/21/2011 23:22:01 | 23.137 |
| 11/19/2010 17:38:00 | 31.0 | 7/21/2011 23:58:01 | 23.137 |
| 11/19/2010 18:13:00 | 31.0 | 7/22/2011 00:34:01 | 23.137 |
| 11/19/2010 18:48:00 | 31.0 | 7/22/2011 01:10:01 | 23.137 |
| 11/19/2010 19:23:00 | 32.5 | 7/22/2011 01:46:01 | 23.137 |
| 11/19/2010 19:58:00 | 33.0 | 7/22/2011 02:22:01 | 23.137 |
| 11/19/2010 20:33:00 | 32.0 | 7/22/2011 02:58:01 | 23.137 |
| 11/19/2010 21:08:00 | 32.0 | 7/22/2011 03:34:01 | 23.137 |
| 11/19/2010 21:43:00 | 32.0 | 7/22/2011 04:10:01 | 23.137 |
| 11/19/2010 22:18:00 | 32.5 | 7/22/2011 04:46:01 | 23.137 |
| 11/19/2010 22:53:00 | 33.0 | 7/22/2011 05:22:01 | 23.137 |
| 11/19/2010 23:28:00 | 32.5 | 7/22/2011 05:58:01 | 23.137 |
| 11/20/2010 00:03:00 | 33.5 | 7/22/2011 06:34:01 | 23.137 |
| 11/20/2010 00:38:00 | 33.5 | 7/22/2011 07:10:01 | 23.137 |
| 11/20/2010 01:13:00 | 33.5 | 7/22/2011 07:46:01 | 23.137 |
| 11/20/2010 01:48:00 | 33.5 | 7/22/2011 08:22:01 | 23.137 |
| 11/20/2010 02:23:00 | 33.5 | 7/22/2011 08:58:01 | 23.137 |
| 11/20/2010 02:58:00 | 33.0 | 7/22/2011 09:34:01 | 23.137 |
| 11/20/2010 03:33:00 | 33.0 | 7/22/2011 10:10:01 | 23.137 |
| 11/20/2010 04:08:00 | 33.5 | 7/22/2011 10:46:01 | 23.137 |
| 11/20/2010 04:43:00 | 33.0 | 7/22/2011 11:22:01 | 23.137 |
| 11/20/2010 05:18:00 | 33.0 | 7/22/2011 11:58:01 | 22.636 |
| 11/20/2010 05:53:00 | 33.0 | 7/22/2011 12:34:01 | 22.636 |
| 11/20/2010 06:28:00 | 32.5 | 7/22/2011 13:10:01 | 22.636 |

|                     |      |                    |        |
|---------------------|------|--------------------|--------|
| 11/20/2010 07:03:00 | 32.0 | 7/22/2011 13:46:01 | 22.636 |
| 11/20/2010 07:38:00 | 32.0 | 7/22/2011 14:22:01 | 22.636 |
| 11/20/2010 08:13:00 | 31.5 | 7/22/2011 14:58:01 | 22.636 |
| 11/20/2010 08:48:00 | 31.5 | 7/22/2011 15:34:01 | 22.636 |
| 11/20/2010 09:23:00 | 31.5 | 7/22/2011 16:10:01 | 22.636 |
| 11/20/2010 09:58:00 | 32.0 | 7/22/2011 16:46:01 | 22.636 |
| 11/20/2010 10:33:00 | 32.0 | 7/22/2011 17:22:01 | 22.636 |
| 11/20/2010 11:08:00 | 32.0 | 7/22/2011 17:58:01 | 22.636 |
| 11/20/2010 11:43:00 | 32.0 | 7/22/2011 18:34:01 | 23.137 |
| 11/20/2010 12:18:00 | 32.0 | 7/22/2011 19:10:01 | 23.137 |
| 11/20/2010 12:53:00 | 32.5 | 7/22/2011 19:46:01 | 23.137 |
| 11/20/2010 13:28:00 | 33.0 | 7/22/2011 20:22:01 | 23.137 |
| 11/20/2010 14:03:00 | 32.5 | 7/22/2011 20:58:01 | 23.137 |
| 11/20/2010 14:38:00 | 32.5 | 7/22/2011 21:34:01 | 23.137 |
| 11/20/2010 15:13:00 | 32.5 | 7/22/2011 22:10:01 | 23.137 |
| 11/20/2010 15:48:00 | 32.5 | 7/22/2011 22:46:01 | 23.137 |
| 11/20/2010 16:23:00 | 32.0 | 7/22/2011 23:22:01 | 23.137 |
| 11/20/2010 16:58:00 | 32.0 | 7/22/2011 23:58:01 | 23.137 |
| 11/20/2010 17:33:00 | 31.5 | 7/23/2011 00:34:01 | 23.137 |
| 11/20/2010 18:08:00 | 32.5 | 7/23/2011 01:10:01 | 23.137 |
| 11/20/2010 18:43:00 | 33.0 | 7/23/2011 01:46:01 | 23.137 |
| 11/20/2010 19:18:00 | 33.5 | 7/23/2011 02:22:01 | 23.137 |
| 11/20/2010 19:53:00 | 34.0 | 7/23/2011 02:58:01 | 23.137 |
| 11/20/2010 20:28:00 | 33.5 | 7/23/2011 03:34:01 | 23.137 |
| 11/20/2010 21:03:00 | 33.5 | 7/23/2011 04:10:01 | 23.137 |
| 11/20/2010 21:38:00 | 34.5 | 7/23/2011 04:46:01 | 23.137 |
| 11/20/2010 22:13:00 | 34.0 | 7/23/2011 05:22:01 | 23.137 |
| 11/20/2010 22:48:00 | 34.0 | 7/23/2011 05:58:01 | 23.137 |
| 11/20/2010 23:23:00 | 34.0 | 7/23/2011 06:34:01 | 23.137 |
| 11/20/2010 23:58:00 | 33.5 | 7/23/2011 07:10:01 | 23.137 |
| 11/21/2010 00:33:00 | 33.5 | 7/23/2011 07:46:01 | 23.137 |
| 11/21/2010 01:08:00 | 33.5 | 7/23/2011 08:22:01 | 23.137 |
| 11/21/2010 01:43:00 | 33.5 | 7/23/2011 08:58:01 | 23.137 |
| 11/21/2010 02:18:00 | 33.5 | 7/23/2011 09:34:01 | 23.137 |
| 11/21/2010 02:53:00 | 33.0 | 7/23/2011 10:10:01 | 23.137 |
| 11/21/2010 03:28:00 | 33.0 | 7/23/2011 10:46:01 | 23.137 |
| 11/21/2010 04:03:00 | 33.0 | 7/23/2011 11:22:01 | 23.137 |
| 11/21/2010 04:38:00 | 33.0 | 7/23/2011 11:58:01 | 23.137 |
| 11/21/2010 05:13:00 | 33.0 | 7/23/2011 12:34:01 | 23.137 |
| 11/21/2010 05:48:00 | 33.0 | 7/23/2011 13:10:01 | 23.137 |
| 11/21/2010 06:23:00 | 32.5 | 7/23/2011 13:46:01 | 23.137 |
| 11/21/2010 06:58:00 | 33.0 | 7/23/2011 14:22:01 | 23.137 |
| 11/21/2010 07:33:00 | 32.5 | 7/23/2011 14:58:01 | 23.137 |
| 11/21/2010 08:08:00 | 33.0 | 7/23/2011 15:34:01 | 23.137 |
| 11/21/2010 08:43:00 | 33.0 | 7/23/2011 16:10:01 | 23.137 |
| 11/21/2010 09:18:00 | 33.0 | 7/23/2011 16:46:01 | 23.137 |
| 11/21/2010 09:53:00 | 32.5 | 7/23/2011 17:22:01 | 23.137 |
| 11/21/2010 10:28:00 | 32.5 | 7/23/2011 17:58:01 | 23.137 |
| 11/21/2010 11:03:00 | 32.5 | 7/23/2011 18:34:01 | 23.137 |
| 11/21/2010 11:38:00 | 32.5 | 7/23/2011 19:10:01 | 23.137 |

|                     |      |                    |        |
|---------------------|------|--------------------|--------|
| 11/21/2010 12:13:00 | 32.5 | 7/23/2011 19:46:01 | 23.137 |
| 11/21/2010 12:48:00 | 32.5 | 7/23/2011 20:22:01 | 23.137 |
| 11/21/2010 13:23:00 | 33.0 | 7/23/2011 20:58:01 | 23.137 |
| 11/21/2010 13:58:00 | 33.0 | 7/23/2011 21:34:01 | 23.137 |
| 11/21/2010 14:33:00 | 32.5 | 7/23/2011 22:10:01 | 23.137 |
| 11/21/2010 15:08:00 | 32.5 | 7/23/2011 22:46:01 | 23.137 |
| 11/21/2010 15:43:00 | 32.5 | 7/23/2011 23:22:01 | 23.137 |
| 11/21/2010 16:18:00 | 32.5 | 7/23/2011 23:58:01 | 23.137 |
| 11/21/2010 16:53:00 | 32.5 | 7/24/2011 00:34:01 | 23.137 |
| 11/21/2010 17:28:00 | 32.5 | 7/24/2011 01:10:01 | 23.137 |
| 11/21/2010 18:03:00 | 32.5 | 7/24/2011 01:46:01 | 23.137 |
| 11/21/2010 18:38:00 | 32.5 | 7/24/2011 02:22:01 | 23.137 |
| 11/21/2010 19:13:00 | 32.5 | 7/24/2011 02:58:01 | 23.137 |
| 11/21/2010 19:48:00 | 33.0 | 7/24/2011 03:34:01 | 23.137 |
| 11/21/2010 20:23:00 | 33.5 | 7/24/2011 04:10:01 | 23.137 |
| 11/21/2010 20:58:00 | 34.0 | 7/24/2011 04:46:01 | 23.137 |
| 11/21/2010 21:33:00 | 34.0 | 7/24/2011 05:22:01 | 23.137 |
| 11/21/2010 22:08:00 | 34.0 | 7/24/2011 05:58:01 | 23.137 |
| 11/21/2010 22:43:00 | 34.0 | 7/24/2011 06:34:01 | 23.137 |
| 11/21/2010 23:18:00 | 34.0 | 7/24/2011 07:10:01 | 23.137 |
| 11/21/2010 23:53:00 | 34.0 | 7/24/2011 07:46:01 | 23.137 |
| 11/22/2010 00:28:00 | 34.5 | 7/24/2011 08:22:01 | 23.137 |
| 11/22/2010 01:03:00 | 34.0 | 7/24/2011 08:58:01 | 23.137 |
| 11/22/2010 01:38:00 | 34.0 | 7/24/2011 09:34:01 | 23.137 |
| 11/22/2010 02:13:00 | 34.0 | 7/24/2011 10:10:01 | 23.137 |
| 11/22/2010 02:48:00 | 33.5 | 7/24/2011 10:46:01 | 23.137 |
| 11/22/2010 03:23:00 | 33.5 | 7/24/2011 11:22:01 | 23.137 |
| 11/22/2010 03:58:00 | 34.0 | 7/24/2011 11:58:01 | 23.137 |
| 11/22/2010 04:33:00 | 33.5 | 7/24/2011 12:34:01 | 23.137 |
| 11/22/2010 05:08:00 | 33.0 | 7/24/2011 13:10:01 | 23.137 |
| 11/22/2010 05:43:00 | 33.0 | 7/24/2011 13:46:01 | 23.137 |
| 11/22/2010 06:18:00 | 32.5 | 7/24/2011 14:22:01 | 23.137 |
| 11/22/2010 06:53:00 | 32.0 | 7/24/2011 14:58:01 | 23.137 |
| 11/22/2010 07:28:00 | 31.5 | 7/24/2011 15:34:01 | 23.137 |
| 11/22/2010 08:03:00 | 31.5 | 7/24/2011 16:10:01 | 23.137 |
| 11/22/2010 08:38:00 | 31.5 | 7/24/2011 16:46:01 | 23.137 |
| 11/22/2010 09:13:00 | 32.0 | 7/24/2011 17:22:01 | 23.137 |
| 11/22/2010 09:48:00 | 33.0 | 7/24/2011 17:58:01 | 23.137 |
| 11/22/2010 10:23:00 | 33.0 | 7/24/2011 18:34:01 | 23.137 |
| 11/22/2010 10:58:00 | 33.0 | 7/24/2011 19:10:01 | 23.137 |
| 11/22/2010 11:33:00 | 33.0 | 7/24/2011 19:46:01 | 23.137 |
| 11/22/2010 12:08:00 | 33.0 | 7/24/2011 20:22:01 | 23.137 |
| 11/22/2010 12:43:00 | 33.0 | 7/24/2011 20:58:01 | 23.137 |
| 11/22/2010 13:18:00 | 33.0 | 7/24/2011 21:34:01 | 23.137 |
| 11/22/2010 13:53:00 | 33.0 | 7/24/2011 22:10:01 | 23.137 |
| 11/22/2010 14:28:00 | 33.0 | 7/24/2011 22:46:01 | 23.137 |
| 11/22/2010 15:03:00 | 33.0 | 7/24/2011 23:22:01 | 23.137 |
| 11/22/2010 15:38:00 | 33.0 | 7/24/2011 23:58:01 | 23.137 |
| 11/22/2010 16:13:00 | 33.5 | 7/25/2011 00:34:01 | 23.137 |
| 11/22/2010 16:48:00 | 33.5 | 7/25/2011 01:10:01 | 23.137 |

|                     |      |                    |        |
|---------------------|------|--------------------|--------|
| 11/22/2010 17:23:00 | 33.0 | 7/25/2011 01:46:01 | 23.137 |
| 11/22/2010 17:58:00 | 33.5 | 7/25/2011 02:22:01 | 23.137 |
| 11/22/2010 18:33:00 | 33.5 | 7/25/2011 02:58:01 | 23.137 |
| 11/22/2010 19:08:00 | 33.5 | 7/25/2011 03:34:01 | 23.137 |
| 11/22/2010 19:43:00 | 34.0 | 7/25/2011 04:10:01 | 23.137 |
| 11/22/2010 20:18:00 | 34.0 | 7/25/2011 04:46:01 | 23.137 |
| 11/22/2010 20:53:00 | 34.0 | 7/25/2011 05:22:01 | 23.137 |
| 11/22/2010 21:28:00 | 34.0 | 7/25/2011 05:58:01 | 23.137 |
| 11/22/2010 22:03:00 | 34.0 | 7/25/2011 06:34:01 | 23.137 |
| 11/22/2010 22:38:00 | 34.0 | 7/25/2011 07:10:01 | 23.137 |
| 11/22/2010 23:13:00 | 34.0 | 7/25/2011 07:46:01 | 23.137 |
| 11/22/2010 23:48:00 | 34.0 | 7/25/2011 08:22:01 | 23.137 |
| 11/23/2010 00:23:00 | 34.0 | 7/25/2011 08:58:01 | 23.137 |
| 11/23/2010 00:58:00 | 34.0 | 7/25/2011 09:34:01 | 23.137 |
| 11/23/2010 01:33:00 | 33.5 | 7/25/2011 10:10:01 | 23.137 |
| 11/23/2010 02:08:00 | 34.0 | 7/25/2011 10:46:01 | 23.137 |
| 11/23/2010 02:43:00 | 34.0 | 7/25/2011 11:22:01 | 23.137 |
| 11/23/2010 03:18:00 | 33.5 | 7/25/2011 11:58:01 | 23.137 |
| 11/23/2010 03:53:00 | 33.5 | 7/25/2011 12:34:01 | 23.137 |
| 11/23/2010 04:28:00 | 33.5 | 7/25/2011 13:10:01 | 23.137 |
| 11/23/2010 05:03:00 | 33.5 | 7/25/2011 13:46:01 | 23.137 |
| 11/23/2010 05:38:00 | 33.5 | 7/25/2011 14:22:01 | 23.137 |
| 11/23/2010 06:13:00 | 33.0 | 7/25/2011 14:58:01 | 23.137 |
| 11/23/2010 06:48:00 | 33.0 | 7/25/2011 15:34:01 | 22.636 |
| 11/23/2010 07:23:00 | 32.5 | 7/25/2011 16:10:01 | 22.636 |
| 11/23/2010 07:58:00 | 32.5 | 7/25/2011 16:46:01 | 23.137 |
| 11/23/2010 08:33:00 | 33.0 | 7/25/2011 17:22:01 | 23.137 |
| 11/23/2010 09:08:00 | 33.5 | 7/25/2011 17:58:01 | 23.137 |
| 11/23/2010 09:43:00 | 33.5 | 7/25/2011 18:34:01 | 23.137 |
| 11/23/2010 10:18:00 | 33.5 | 7/25/2011 19:10:01 | 23.137 |
| 11/23/2010 10:53:00 | 34.0 | 7/25/2011 19:46:01 | 23.137 |
| 11/23/2010 11:28:00 | 33.5 | 7/25/2011 20:22:01 | 23.137 |
| 11/23/2010 12:03:00 | 33.5 | 7/25/2011 20:58:01 | 23.137 |
| 11/23/2010 12:38:00 | 34.0 | 7/25/2011 21:34:01 | 23.137 |
| 11/23/2010 13:13:00 | 34.0 | 7/25/2011 22:10:01 | 23.137 |
| 11/23/2010 13:48:00 | 34.0 | 7/25/2011 22:46:01 | 23.137 |
| 11/23/2010 14:23:00 | 34.0 | 7/25/2011 23:22:01 | 23.137 |
| 11/23/2010 14:58:00 | 34.0 | 7/25/2011 23:58:01 | 23.137 |
| 11/23/2010 15:33:00 | 34.0 | 7/26/2011 00:34:01 | 23.137 |
| 11/23/2010 16:08:00 | 34.0 | 7/26/2011 01:10:01 | 23.137 |
| 11/23/2010 16:43:00 | 34.5 | 7/26/2011 01:46:01 | 22.636 |
| 11/23/2010 17:18:00 | 34.0 | 7/26/2011 02:22:01 | 23.137 |
| 11/23/2010 17:53:00 | 34.0 | 7/26/2011 02:58:01 | 22.636 |
| 11/23/2010 18:28:00 | 34.0 | 7/26/2011 03:34:01 | 22.636 |
| 11/23/2010 19:03:00 | 34.0 | 7/26/2011 04:10:01 | 22.636 |
| 11/23/2010 19:38:00 | 34.5 | 7/26/2011 04:46:01 | 22.636 |
| 11/23/2010 20:13:00 | 34.5 | 7/26/2011 05:22:01 | 22.636 |
| 11/23/2010 20:48:00 | 34.5 | 7/26/2011 05:58:01 | 22.636 |
| 11/23/2010 21:23:00 | 34.5 | 7/26/2011 06:34:01 | 22.636 |
| 11/23/2010 21:58:00 | 34.5 | 7/26/2011 07:10:01 | 22.636 |

|                     |      |                    |        |
|---------------------|------|--------------------|--------|
| 11/23/2010 22:33:00 | 34.5 | 7/26/2011 07:46:01 | 22.636 |
| 11/23/2010 23:08:00 | 34.5 | 7/26/2011 08:22:01 | 22.636 |
| 11/23/2010 23:43:00 | 34.5 | 7/26/2011 08:58:01 | 22.636 |
| 11/24/2010 00:18:00 | 34.5 | 7/26/2011 09:34:01 | 22.636 |
| 11/24/2010 00:53:00 | 34.5 | 7/26/2011 10:10:01 | 22.636 |
| 11/24/2010 01:28:00 | 34.0 | 7/26/2011 10:46:01 | 22.636 |
| 11/24/2010 02:03:00 | 34.0 | 7/26/2011 11:22:01 | 22.636 |
| 11/24/2010 02:38:00 | 34.0 | 7/26/2011 11:58:01 | 22.636 |
| 11/24/2010 03:13:00 | 33.5 | 7/26/2011 12:34:01 | 22.636 |
| 11/24/2010 03:48:00 | 33.5 | 7/26/2011 13:10:01 | 22.636 |
| 11/24/2010 04:23:00 | 33.0 | 7/26/2011 13:46:01 | 22.636 |
| 11/24/2010 04:58:00 | 33.0 | 7/26/2011 14:22:01 | 22.636 |
| 11/24/2010 05:33:00 | 33.0 | 7/26/2011 14:58:01 | 22.636 |
| 11/24/2010 06:08:00 | 33.0 | 7/26/2011 15:34:01 | 22.636 |
| 11/24/2010 06:43:00 | 33.0 | 7/26/2011 16:10:01 | 22.636 |
| 11/24/2010 07:18:00 | 32.0 | 7/26/2011 16:46:01 | 22.636 |
| 11/24/2010 07:53:00 | 31.0 | 7/26/2011 17:22:01 | 22.636 |
| 11/24/2010 08:28:00 | 29.5 | 7/26/2011 17:58:01 | 22.636 |
| 11/24/2010 09:03:00 | 28.5 | 7/26/2011 18:34:01 | 22.636 |
| 11/24/2010 09:38:00 | 27.5 | 7/26/2011 19:10:01 | 22.636 |
| 11/24/2010 10:13:00 | 27.0 | 7/26/2011 19:46:01 | 22.636 |
| 11/24/2010 10:48:00 | 26.5 | 7/26/2011 20:22:01 | 22.636 |
| 11/24/2010 11:23:00 | 26.0 | 7/26/2011 20:58:01 | 22.636 |
| 11/24/2010 11:58:00 | 25.5 | 7/26/2011 21:34:01 | 22.636 |
| 11/24/2010 12:33:00 | 25.0 | 7/26/2011 22:10:01 | 22.636 |
| 11/24/2010 13:08:00 | 25.5 | 7/26/2011 22:46:01 | 22.636 |
| 11/24/2010 13:43:00 | 27.0 | 7/26/2011 23:22:01 | 22.636 |
| 11/24/2010 14:18:00 | 28.5 | 7/26/2011 23:58:01 | 22.636 |
| 11/24/2010 14:53:00 | 30.5 | 7/27/2011 00:34:01 | 22.636 |
| 11/24/2010 15:28:00 | 32.0 | 7/27/2011 01:10:01 | 22.636 |
| 11/24/2010 16:03:00 | 32.5 | 7/27/2011 01:46:01 | 22.636 |
| 11/24/2010 16:38:00 | 32.5 | 7/27/2011 02:22:01 | 22.636 |
| 11/24/2010 17:13:00 | 32.5 | 7/27/2011 02:58:01 | 23.137 |
| 11/24/2010 17:48:00 | 32.0 | 7/27/2011 03:34:01 | 23.137 |
| 11/24/2010 18:23:00 | 31.5 | 7/27/2011 04:10:01 | 22.636 |
| 11/24/2010 18:58:00 | 32.0 | 7/27/2011 04:46:01 | 22.636 |
| 11/24/2010 19:33:00 | 33.5 | 7/27/2011 05:22:01 | 22.636 |
| 11/24/2010 20:08:00 | 34.0 | 7/27/2011 05:58:01 | 22.636 |
| 11/24/2010 20:43:00 | 34.0 | 7/27/2011 06:34:01 | 22.636 |
| 11/24/2010 21:18:00 | 34.5 | 7/27/2011 07:10:01 | 22.636 |
| 11/24/2010 21:53:00 | 34.5 | 7/27/2011 07:46:01 | 22.636 |
| 11/24/2010 22:28:00 | 34.5 | 7/27/2011 08:22:01 | 22.636 |
| 11/24/2010 23:03:00 | 34.0 | 7/27/2011 08:58:01 | 22.636 |
| 11/24/2010 23:38:00 | 34.0 | 7/27/2011 09:34:01 | 22.636 |
| 11/25/2010 00:13:00 | 34.5 | 7/27/2011 10:10:01 | 22.636 |
| 11/25/2010 00:48:00 | 34.0 | 7/27/2011 10:46:01 | 22.636 |
| 11/25/2010 01:23:00 | 34.5 | 7/27/2011 11:22:01 | 22.636 |
| 11/25/2010 01:58:00 | 34.0 | 7/27/2011 11:58:01 | 22.636 |
| 11/25/2010 02:33:00 | 33.5 | 7/27/2011 12:34:01 | 22.636 |
| 11/25/2010 03:08:00 | 33.5 | 7/27/2011 13:10:01 | 22.636 |

|                     |      |                    |        |
|---------------------|------|--------------------|--------|
| 11/25/2010 03:43:00 | 33.5 | 7/27/2011 13:46:01 | 22.636 |
| 11/25/2010 04:18:00 | 33.0 | 7/27/2011 14:22:01 | 22.636 |
| 11/25/2010 04:53:00 | 33.0 | 7/27/2011 14:58:01 | 22.636 |
| 11/25/2010 05:28:00 | 32.5 | 7/27/2011 15:34:01 | 22.636 |
| 11/25/2010 06:03:00 | 32.0 | 7/27/2011 16:10:01 | 22.636 |
| 11/25/2010 06:38:00 | 32.0 | 7/27/2011 16:46:01 | 22.636 |
| 11/25/2010 07:13:00 | 32.0 | 7/27/2011 17:22:01 | 22.636 |
| 11/25/2010 07:48:00 | 32.0 | 7/27/2011 17:58:01 | 22.636 |
| 11/25/2010 08:23:00 | 32.5 | 7/27/2011 18:34:01 | 22.636 |
| 11/25/2010 08:58:00 | 32.5 | 7/27/2011 19:10:01 | 22.636 |
| 11/25/2010 09:33:00 | 32.0 | 7/27/2011 19:46:01 | 22.636 |
| 11/25/2010 10:08:00 | 30.0 | 7/27/2011 20:22:01 | 22.636 |
| 11/25/2010 10:43:00 | 27.5 | 7/27/2011 20:58:01 | 22.636 |
| 11/25/2010 11:18:00 | 26.5 | 7/27/2011 21:34:01 | 22.636 |
| 11/25/2010 11:53:00 | 27.0 | 7/27/2011 22:10:01 | 22.636 |
| 11/25/2010 12:28:00 | 26.0 | 7/27/2011 22:46:01 | 22.636 |
| 11/25/2010 13:03:00 | 24.5 | 7/27/2011 23:22:01 | 22.636 |
| 11/25/2010 13:38:00 | 24.0 | 7/27/2011 23:58:01 | 22.636 |
| 11/25/2010 14:13:00 | 23.0 | 7/28/2011 00:34:01 | 22.636 |
| 11/25/2010 14:48:00 | 22.5 | 7/28/2011 01:10:01 | 22.636 |
| 11/25/2010 15:23:00 | 22.0 | 7/28/2011 01:46:01 | 22.636 |
| 11/25/2010 15:58:00 | 21.0 | 7/28/2011 02:22:01 | 22.636 |
| 11/25/2010 16:33:00 | 20.5 | 7/28/2011 02:58:01 | 22.636 |
| 11/25/2010 17:08:00 | 22.5 | 7/28/2011 03:34:01 | 22.636 |
| 11/25/2010 17:43:00 | 27.5 | 7/28/2011 04:10:01 | 22.636 |
| 11/25/2010 18:18:00 | 31.0 | 7/28/2011 04:46:01 | 22.636 |
| 11/25/2010 18:53:00 | 32.5 | 7/28/2011 05:22:01 | 22.636 |
| 11/25/2010 19:28:00 | 33.5 | 7/28/2011 05:58:01 | 22.636 |
| 11/25/2010 20:03:00 | 34.0 | 7/28/2011 06:34:01 | 22.636 |
| 11/25/2010 20:38:00 | 34.5 | 7/28/2011 07:10:01 | 22.636 |
| 11/25/2010 21:13:00 | 35.0 | 7/28/2011 07:46:01 | 22.636 |
| 11/25/2010 21:48:00 | 34.5 | 7/28/2011 08:22:01 | 22.636 |
| 11/25/2010 22:23:00 | 34.5 | 7/28/2011 08:58:01 | 22.636 |
| 11/25/2010 22:58:00 | 34.5 | 7/28/2011 09:34:01 | 22.636 |
| 11/25/2010 23:33:00 | 34.5 | 7/28/2011 10:10:01 | 22.636 |
| 11/26/2010 00:08:00 | 34.5 | 7/28/2011 10:46:01 | 22.636 |
| 11/26/2010 00:43:00 | 34.5 | 7/28/2011 11:22:01 | 22.636 |
| 11/26/2010 01:18:00 | 34.0 | 7/28/2011 11:58:01 | 22.636 |
| 11/26/2010 01:53:00 | 34.5 | 7/28/2011 12:34:01 | 22.636 |
| 11/26/2010 02:28:00 | 34.5 | 7/28/2011 13:10:01 | 22.636 |
| 11/26/2010 03:03:00 | 34.5 | 7/28/2011 13:46:01 | 22.636 |
| 11/26/2010 03:38:00 | 34.0 | 7/28/2011 14:22:01 | 22.636 |
| 11/26/2010 04:13:00 | 34.0 | 7/28/2011 14:58:01 | 22.636 |
| 11/26/2010 04:48:00 | 34.0 | 7/28/2011 15:34:01 | 22.636 |
| 11/26/2010 05:23:00 | 34.0 | 7/28/2011 16:10:01 | 22.636 |
| 11/26/2010 05:58:00 | 34.0 | 7/28/2011 16:46:01 | 22.636 |
| 11/26/2010 06:33:00 | 34.0 | 7/28/2011 17:22:01 | 22.636 |
| 11/26/2010 07:08:00 | 34.0 | 7/28/2011 17:58:01 | 22.636 |
| 11/26/2010 07:43:00 | 34.0 | 7/28/2011 18:34:01 | 22.636 |
| 11/26/2010 08:18:00 | 34.0 | 7/28/2011 19:10:01 | 22.636 |

|                     |      |                    |        |
|---------------------|------|--------------------|--------|
| 11/26/2010 08:53:00 | 33.5 | 7/28/2011 19:46:01 | 22.636 |
| 11/26/2010 09:28:00 | 33.5 | 7/28/2011 20:22:01 | 22.636 |
| 11/26/2010 10:03:00 | 33.5 | 7/28/2011 20:58:01 | 22.636 |
| 11/26/2010 10:38:00 | 33.0 | 7/28/2011 21:34:01 | 22.636 |
| 11/26/2010 11:13:00 | 33.0 | 7/28/2011 22:10:01 | 22.636 |
| 11/26/2010 11:48:00 | 33.0 | 7/28/2011 22:46:01 | 22.636 |
| 11/26/2010 12:23:00 | 33.0 | 7/28/2011 23:22:01 | 22.636 |
| 11/26/2010 12:58:00 | 33.0 | 7/28/2011 23:58:01 | 22.636 |
| 11/26/2010 13:33:00 | 33.0 | 7/29/2011 00:34:01 | 22.636 |
| 11/26/2010 14:08:00 | 33.5 | 7/29/2011 01:10:01 | 22.636 |
| 11/26/2010 14:43:00 | 33.5 | 7/29/2011 01:46:01 | 22.636 |
| 11/26/2010 15:18:00 | 33.5 | 7/29/2011 02:22:01 | 22.636 |
| 11/26/2010 15:53:00 | 33.5 | 7/29/2011 02:58:01 | 22.636 |
| 11/26/2010 16:28:00 | 34.0 | 7/29/2011 03:34:01 | 22.636 |
| 11/26/2010 17:03:00 | 34.0 | 7/29/2011 04:10:01 | 22.636 |
| 11/26/2010 17:38:00 | 34.0 | 7/29/2011 04:46:01 | 22.636 |
| 11/26/2010 18:13:00 | 34.0 | 7/29/2011 05:22:01 | 22.636 |
| 11/26/2010 18:48:00 | 33.5 | 7/29/2011 05:58:01 | 22.636 |
| 11/26/2010 19:23:00 | 33.5 | 7/29/2011 06:34:01 | 22.636 |
| 11/26/2010 19:58:00 | 34.0 | 7/29/2011 07:10:01 | 22.636 |
| 11/26/2010 20:33:00 | 34.0 | 7/29/2011 07:46:01 | 22.636 |
| 11/26/2010 21:08:00 | 34.0 | 7/29/2011 08:22:01 | 22.636 |
| 11/26/2010 21:43:00 | 34.0 | 7/29/2011 08:58:01 | 22.636 |
| 11/26/2010 22:18:00 | 34.0 | 7/29/2011 09:34:01 | 22.636 |
| 11/26/2010 22:53:00 | 34.0 | 7/29/2011 10:10:01 | 22.636 |
| 11/26/2010 23:28:00 | 34.0 | 7/29/2011 10:46:01 | 22.636 |
| 11/27/2010 00:03:00 | 34.0 | 7/29/2011 11:22:01 | 22.636 |
| 11/27/2010 00:38:00 | 34.0 | 7/29/2011 11:58:01 | 22.636 |
| 11/27/2010 01:13:00 | 34.5 | 7/29/2011 12:34:01 | 22.636 |
| 11/27/2010 01:48:00 | 34.5 | 7/29/2011 13:10:01 | 22.636 |
| 11/27/2010 02:23:00 | 34.5 | 7/29/2011 13:46:01 | 22.636 |
| 11/27/2010 02:58:00 | 34.0 | 7/29/2011 14:22:01 | 22.636 |
| 11/27/2010 03:33:00 | 33.5 | 7/29/2011 14:58:01 | 22.636 |
| 11/27/2010 04:08:00 | 33.5 | 7/29/2011 15:34:01 | 22.136 |
| 11/27/2010 04:43:00 | 33.0 | 7/29/2011 16:10:01 | 22.636 |
| 11/27/2010 05:18:00 | 33.0 | 7/29/2011 16:46:01 | 22.636 |
| 11/27/2010 05:53:00 | 32.5 | 7/29/2011 17:22:01 | 22.636 |
| 11/27/2010 06:28:00 | 32.5 | 7/29/2011 17:58:01 | 22.636 |
| 11/27/2010 07:03:00 | 32.0 | 7/29/2011 18:34:01 | 22.636 |
| 11/27/2010 07:38:00 | 32.5 | 7/29/2011 19:10:01 | 22.636 |
| 11/27/2010 08:13:00 | 33.5 | 7/29/2011 19:46:01 | 22.636 |
| 11/27/2010 08:48:00 | 34.5 | 7/29/2011 20:22:01 | 22.636 |
| 11/27/2010 09:23:00 | 35.0 | 7/29/2011 20:58:01 | 22.636 |
| 11/27/2010 09:58:00 | 35.0 | 7/29/2011 21:34:01 | 22.636 |
| 11/27/2010 10:33:00 | 35.0 | 7/29/2011 22:10:01 | 22.636 |
| 11/27/2010 11:08:00 | 35.0 | 7/29/2011 22:46:01 | 22.636 |
| 11/27/2010 11:43:00 | 35.0 | 7/29/2011 23:22:01 | 22.636 |
| 11/27/2010 12:18:00 | 35.5 | 7/29/2011 23:58:01 | 22.636 |
| 11/27/2010 12:53:00 | 35.5 | 7/30/2011 00:34:01 | 22.636 |
| 11/27/2010 13:28:00 | 35.5 | 7/30/2011 01:10:01 | 22.636 |



|                     |      |                    |        |
|---------------------|------|--------------------|--------|
| 11/27/2010 14:03:00 | 35.5 | 7/30/2011 01:46:01 | 22.636 |
| 11/27/2010 14:38:00 | 34.5 | 7/30/2011 02:22:01 | 22.636 |
| 11/27/2010 15:13:00 | 34.0 | 7/30/2011 02:58:01 | 22.636 |
| 11/27/2010 15:48:00 | 33.5 | 7/30/2011 03:34:01 | 22.636 |
| 11/27/2010 16:23:00 | 33.5 | 7/30/2011 04:10:01 | 22.636 |
| 11/27/2010 16:58:00 | 33.5 | 7/30/2011 04:46:01 | 22.636 |
| 11/27/2010 17:33:00 | 33.0 | 7/30/2011 05:22:01 | 22.636 |
| 11/27/2010 18:08:00 | 33.0 | 7/30/2011 05:58:01 | 22.636 |
| 11/27/2010 18:43:00 | 33.0 | 7/30/2011 06:34:01 | 22.636 |
| 11/27/2010 19:18:00 | 33.5 | 7/30/2011 07:10:01 | 22.636 |
| 11/27/2010 19:53:00 | 34.0 | 7/30/2011 07:46:01 | 22.636 |
| 11/27/2010 20:28:00 | 33.5 | 7/30/2011 08:22:01 | 22.636 |
| 11/27/2010 21:03:00 | 34.5 | 7/30/2011 08:58:01 | 22.636 |
| 11/27/2010 21:38:00 | 34.5 | 7/30/2011 09:34:01 | 22.636 |
| 11/27/2010 22:13:00 | 34.5 | 7/30/2011 10:10:01 | 22.636 |
| 11/27/2010 22:48:00 | 34.5 | 7/30/2011 10:46:01 | 22.636 |
| 11/27/2010 23:23:00 | 34.0 | 7/30/2011 11:22:01 | 22.636 |
| 11/27/2010 23:58:00 | 34.0 | 7/30/2011 11:58:01 | 22.636 |
| 11/28/2010 00:33:00 | 34.5 | 7/30/2011 12:34:01 | 22.636 |
| 11/28/2010 01:08:00 | 34.5 | 7/30/2011 13:10:01 | 22.636 |
| 11/28/2010 01:43:00 | 34.0 | 7/30/2011 13:46:01 | 22.636 |
| 11/28/2010 02:18:00 | 34.5 | 7/30/2011 14:22:01 | 22.636 |
| 11/28/2010 02:53:00 | 34.5 | 7/30/2011 14:58:01 | 22.636 |
| 11/28/2010 03:28:00 | 34.5 | 7/30/2011 15:34:01 | 22.636 |
| 11/28/2010 04:03:00 | 33.5 | 7/30/2011 16:10:01 | 22.636 |
| 11/28/2010 04:38:00 | 33.0 | 7/30/2011 16:46:01 | 22.636 |
| 11/28/2010 05:13:00 | 33.0 | 7/30/2011 17:22:01 | 22.636 |
| 11/28/2010 05:48:00 | 33.0 | 7/30/2011 17:58:01 | 22.636 |
| 11/28/2010 06:23:00 | 33.0 | 7/30/2011 18:34:01 | 22.636 |
| 11/28/2010 06:58:00 | 32.5 | 7/30/2011 19:10:01 | 22.636 |
| 11/28/2010 07:33:00 | 32.5 | 7/30/2011 19:46:01 | 22.636 |
| 11/28/2010 08:08:00 | 32.5 | 7/30/2011 20:22:01 | 22.636 |
| 11/28/2010 08:43:00 | 32.5 | 7/30/2011 20:58:01 | 22.636 |
| 11/28/2010 09:18:00 | 32.5 | 7/30/2011 21:34:01 | 22.636 |
| 11/28/2010 09:53:00 | 32.5 | 7/30/2011 22:10:01 | 22.636 |
| 11/28/2010 10:28:00 | 32.5 | 7/30/2011 22:46:01 | 22.636 |
| 11/28/2010 11:03:00 | 32.5 | 7/30/2011 23:22:01 | 22.636 |
| 11/28/2010 11:38:00 | 32.5 | 7/30/2011 23:58:01 | 23.137 |
| 11/28/2010 12:13:00 | 32.5 | 7/31/2011 00:34:01 | 23.137 |
| 11/28/2010 12:48:00 | 33.0 | 7/31/2011 01:10:01 | 23.137 |
| 11/28/2010 13:23:00 | 33.0 | 7/31/2011 01:46:01 | 23.137 |
| 11/28/2010 13:58:00 | 33.0 | 7/31/2011 02:22:01 | 23.137 |
| 11/28/2010 14:33:00 | 33.0 | 7/31/2011 02:58:01 | 23.137 |
| 11/28/2010 15:08:00 | 33.0 | 7/31/2011 03:34:01 | 23.137 |
| 11/28/2010 15:43:00 | 33.0 | 7/31/2011 04:10:01 | 23.137 |
| 11/28/2010 16:18:00 | 33.0 | 7/31/2011 04:46:01 | 22.636 |
| 11/28/2010 16:53:00 | 33.0 | 7/31/2011 05:22:01 | 22.636 |
| 11/28/2010 17:28:00 | 33.0 | 7/31/2011 05:58:01 | 22.636 |
| 11/28/2010 18:03:00 | 33.0 | 7/31/2011 06:34:01 | 22.636 |
| 11/28/2010 18:38:00 | 33.0 | 7/31/2011 07:10:01 | 22.636 |

|                     |      |                    |        |
|---------------------|------|--------------------|--------|
| 11/28/2010 19:13:00 | 33.0 | 7/31/2011 07:46:01 | 22.636 |
| 11/28/2010 19:48:00 | 33.0 | 7/31/2011 08:22:01 | 22.636 |
| 11/28/2010 20:23:00 | 33.0 | 7/31/2011 08:58:01 | 22.636 |
| 11/28/2010 20:58:00 | 33.5 | 7/31/2011 09:34:01 | 22.636 |
| 11/28/2010 21:33:00 | 33.5 | 7/31/2011 10:10:01 | 22.636 |
| 11/28/2010 22:08:00 | 34.0 | 7/31/2011 10:46:01 | 22.636 |
| 11/28/2010 22:43:00 | 34.5 | 7/31/2011 11:22:01 | 22.636 |
| 11/28/2010 23:18:00 | 34.5 | 7/31/2011 11:58:01 | 22.636 |
| 11/28/2010 23:53:00 | 35.0 | 7/31/2011 12:34:01 | 22.636 |
| 11/29/2010 00:28:00 | 34.5 | 7/31/2011 13:10:01 | 22.636 |
| 11/29/2010 01:03:00 | 34.5 | 7/31/2011 13:46:01 | 22.636 |
| 11/29/2010 01:38:00 | 35.0 | 7/31/2011 14:22:01 | 22.636 |
| 11/29/2010 02:13:00 | 34.5 | 7/31/2011 14:58:01 | 22.636 |
| 11/29/2010 02:48:00 | 34.5 | 7/31/2011 15:34:01 | 22.636 |
| 11/29/2010 03:23:00 | 34.0 | 7/31/2011 16:10:01 | 22.636 |
| 11/29/2010 03:58:00 | 34.0 | 7/31/2011 16:46:01 | 22.636 |
| 11/29/2010 04:33:00 | 34.0 | 7/31/2011 17:22:01 | 22.636 |
| 11/29/2010 05:08:00 | 33.5 | 7/31/2011 17:58:01 | 22.636 |
| 11/29/2010 05:43:00 | 33.5 | 7/31/2011 18:34:01 | 22.636 |
| 11/29/2010 06:18:00 | 33.5 | 7/31/2011 19:10:01 | 22.636 |
| 11/29/2010 06:53:00 | 33.5 | 7/31/2011 19:46:01 | 22.636 |
| 11/29/2010 07:28:00 | 33.5 | 7/31/2011 20:22:01 | 22.636 |
| 11/29/2010 08:03:00 | 33.5 | 7/31/2011 20:58:01 | 22.636 |
| 11/29/2010 08:38:00 | 33.0 | 7/31/2011 21:34:01 | 22.636 |
| 11/29/2010 09:13:00 | 32.0 | 7/31/2011 22:10:01 | 22.636 |
| 11/29/2010 09:48:00 | 32.0 | 7/31/2011 22:46:01 | 22.636 |
| 11/29/2010 10:23:00 | 31.5 | 7/31/2011 23:22:01 | 22.636 |
| 11/29/2010 10:58:00 | 31.0 | 7/31/2011 23:58:01 | 22.636 |
| 11/29/2010 11:33:00 | 31.0 | 8/1/2011 00:34:01  | 22.636 |
| 11/29/2010 12:08:00 | 30.5 | 8/1/2011 01:10:01  | 22.636 |
| 11/29/2010 12:43:00 | 30.5 | 8/1/2011 01:46:01  | 23.137 |
| 11/29/2010 13:18:00 | 30.0 | 8/1/2011 02:22:01  | 23.137 |
| 11/29/2010 13:53:00 | 30.0 | 8/1/2011 02:58:01  | 23.137 |
| 11/29/2010 14:28:00 | 29.5 | 8/1/2011 03:34:01  | 23.137 |
| 11/29/2010 15:03:00 | 31.0 | 8/1/2011 04:10:01  | 23.137 |
| 11/29/2010 15:38:00 | 31.0 | 8/1/2011 04:46:01  | 23.137 |
| 11/29/2010 16:13:00 | 31.0 | 8/1/2011 05:22:01  | 22.636 |
| 11/29/2010 16:48:00 | 31.0 | 8/1/2011 05:58:01  | 22.636 |
| 11/29/2010 17:23:00 | 32.5 | 8/1/2011 06:34:01  | 22.636 |
| 11/29/2010 17:58:00 | 32.5 | 8/1/2011 07:10:01  | 22.636 |
| 11/29/2010 18:33:00 | 32.0 | 8/1/2011 07:46:01  | 22.636 |
| 11/29/2010 19:08:00 | 32.5 | 8/1/2011 08:22:01  | 22.636 |
| 11/29/2010 19:43:00 | 33.0 | 8/1/2011 08:58:01  | 22.636 |
| 11/29/2010 20:18:00 | 33.5 | 8/1/2011 09:34:01  | 22.636 |
| 11/29/2010 20:53:00 | 33.0 | 8/1/2011 10:10:01  | 22.636 |
| 11/29/2010 21:28:00 | 33.5 | 8/1/2011 10:46:01  | 22.636 |
| 11/29/2010 22:03:00 | 33.5 | 8/1/2011 11:22:01  | 22.636 |
| 11/29/2010 22:38:00 | 33.0 | 8/1/2011 11:58:01  | 22.636 |
| 11/29/2010 23:13:00 | 34.0 | 8/1/2011 12:34:01  | 22.636 |
| 11/29/2010 23:48:00 | 34.0 | 8/1/2011 13:10:01  | 22.636 |

|                     |      |                   |        |
|---------------------|------|-------------------|--------|
| 11/30/2010 00:23:00 | 34.0 | 8/1/2011 13:46:01 | 22.636 |
| 11/30/2010 00:58:00 | 34.5 | 8/1/2011 14:22:01 | 22.636 |
| 11/30/2010 01:33:00 | 34.5 | 8/1/2011 14:58:01 | 22.636 |
| 11/30/2010 02:08:00 | 34.5 | 8/1/2011 15:34:01 | 22.636 |
| 11/30/2010 02:43:00 | 34.5 | 8/1/2011 16:10:01 | 22.636 |
| 11/30/2010 03:18:00 | 34.0 | 8/1/2011 16:46:01 | 22.636 |
| 11/30/2010 03:53:00 | 34.0 | 8/1/2011 17:22:01 | 22.636 |
| 11/30/2010 04:28:00 | 34.0 | 8/1/2011 17:58:01 | 22.636 |
| 11/30/2010 05:03:00 | 33.5 | 8/1/2011 18:34:01 | 22.636 |
| 11/30/2010 05:38:00 | 33.5 | 8/1/2011 19:10:01 | 22.636 |
| 11/30/2010 06:13:00 | 33.5 | 8/1/2011 19:46:01 | 22.636 |
| 11/30/2010 06:48:00 | 33.5 | 8/1/2011 20:22:01 | 22.636 |
| 11/30/2010 07:23:00 | 33.5 | 8/1/2011 20:58:01 | 22.636 |
| 11/30/2010 07:58:00 | 33.5 | 8/1/2011 21:34:01 | 22.636 |
| 11/30/2010 08:33:00 | 33.5 | 8/1/2011 22:10:01 | 22.636 |
| 11/30/2010 09:08:00 | 33.5 | 8/1/2011 22:46:01 | 22.636 |
| 11/30/2010 09:43:00 | 33.0 | 8/1/2011 23:22:01 | 22.636 |
| 11/30/2010 10:18:00 | 33.0 | 8/1/2011 23:58:01 | 22.636 |
| 11/30/2010 10:53:00 | 32.5 | 8/2/2011 00:34:01 | 22.636 |
| 11/30/2010 11:28:00 | 32.0 | 8/2/2011 01:10:01 | 22.636 |
| 11/30/2010 12:03:00 | 32.5 | 8/2/2011 01:46:01 | 22.636 |
| 11/30/2010 12:38:00 | 32.5 | 8/2/2011 02:22:01 | 22.636 |
| 11/30/2010 13:13:00 | 32.5 | 8/2/2011 02:58:01 | 22.636 |
| 11/30/2010 13:48:00 | 33.0 | 8/2/2011 03:34:01 | 22.636 |
| 11/30/2010 14:23:00 | 33.0 | 8/2/2011 04:10:01 | 22.636 |
| 11/30/2010 14:58:00 | 33.0 | 8/2/2011 04:46:01 | 22.636 |
| 11/30/2010 15:33:00 | 33.0 | 8/2/2011 05:22:01 | 23.137 |
| 11/30/2010 16:08:00 | 33.0 | 8/2/2011 05:58:01 | 23.137 |
| 11/30/2010 16:43:00 | 33.0 | 8/2/2011 06:34:01 | 23.137 |
| 11/30/2010 17:18:00 | 33.0 | 8/2/2011 07:10:01 | 23.137 |
| 11/30/2010 17:53:00 | 33.5 | 8/2/2011 07:46:01 | 22.636 |
| 11/30/2010 18:28:00 | 33.0 | 8/2/2011 08:22:01 | 23.137 |
| 11/30/2010 19:03:00 | 33.0 | 8/2/2011 08:58:01 | 22.636 |
| 11/30/2010 19:38:00 | 33.0 | 8/2/2011 09:34:01 | 22.636 |
| 11/30/2010 20:13:00 | 34.0 | 8/2/2011 10:10:01 | 22.636 |
| 11/30/2010 20:48:00 | 34.0 | 8/2/2011 10:46:01 | 22.636 |
| 11/30/2010 21:23:00 | 35.0 | 8/2/2011 11:22:01 | 22.636 |
| 11/30/2010 21:58:00 | 34.5 | 8/2/2011 11:58:01 | 22.636 |
| 11/30/2010 22:33:00 | 34.5 | 8/2/2011 12:34:01 | 22.636 |
| 11/30/2010 23:08:00 | 34.0 | 8/2/2011 13:10:01 | 22.636 |
| 11/30/2010 23:43:00 | 34.0 | 8/2/2011 13:46:01 | 22.636 |
| 12/1/2010 00:18:00  | 34.0 | 8/2/2011 14:22:01 | 22.636 |
| 12/1/2010 00:53:00  | 34.0 | 8/2/2011 14:58:01 | 22.636 |
| 12/1/2010 01:28:00  | 34.0 | 8/2/2011 15:34:01 | 22.636 |
| 12/1/2010 02:03:00  | 34.5 | 8/2/2011 16:10:01 | 22.636 |
| 12/1/2010 02:38:00  | 34.5 | 8/2/2011 16:46:01 | 22.636 |
| 12/1/2010 03:13:00  | 34.5 | 8/2/2011 17:22:01 | 22.636 |
| 12/1/2010 03:48:00  | 34.0 | 8/2/2011 17:58:01 | 22.636 |
| 12/1/2010 04:23:00  | 33.5 | 8/2/2011 18:34:01 | 22.636 |
| 12/1/2010 04:58:00  | 33.0 | 8/2/2011 19:10:01 | 22.636 |

|                    |      |                   |        |
|--------------------|------|-------------------|--------|
| 12/1/2010 05:33:00 | 33.0 | 8/2/2011 19:46:01 | 22.636 |
| 12/1/2010 06:08:00 | 32.5 | 8/2/2011 20:22:01 | 22.636 |
| 12/1/2010 06:43:00 | 32.5 | 8/2/2011 20:58:01 | 22.636 |
| 12/1/2010 07:18:00 | 32.5 | 8/2/2011 21:34:01 | 22.636 |
| 12/1/2010 07:53:00 | 32.5 | 8/2/2011 22:10:01 | 23.137 |
| 12/1/2010 08:28:00 | 32.5 | 8/2/2011 22:46:01 | 23.137 |
| 12/1/2010 09:03:00 | 32.0 | 8/2/2011 23:22:01 | 23.137 |
| 12/1/2010 09:38:00 | 32.0 | 8/2/2011 23:58:01 | 23.137 |
| 12/1/2010 10:13:00 | 32.5 | 8/3/2011 00:34:01 | 23.137 |
| 12/1/2010 10:48:00 | 32.0 | 8/3/2011 01:10:01 | 23.137 |
| 12/1/2010 11:23:00 | 32.5 | 8/3/2011 01:46:01 | 23.137 |
| 12/1/2010 11:58:00 | 32.5 | 8/3/2011 02:22:01 | 23.137 |
| 12/1/2010 12:33:00 | 32.5 | 8/3/2011 02:58:01 | 23.137 |
| 12/1/2010 13:08:00 | 32.5 | 8/3/2011 03:34:01 | 23.137 |
| 12/1/2010 13:43:00 | 32.5 | 8/3/2011 04:10:01 | 23.137 |
| 12/1/2010 14:18:00 | 32.5 | 8/3/2011 04:46:01 | 23.137 |
| 12/1/2010 14:53:00 | 33.0 | 8/3/2011 05:22:01 | 23.137 |
| 12/1/2010 15:28:00 | 33.0 | 8/3/2011 05:58:01 | 23.137 |
| 12/1/2010 16:03:00 | 33.0 | 8/3/2011 06:34:01 | 23.137 |
| 12/1/2010 16:38:00 | 33.0 | 8/3/2011 07:10:01 | 23.137 |
| 12/1/2010 17:13:00 | 33.0 | 8/3/2011 07:46:01 | 23.137 |
| 12/1/2010 17:48:00 | 33.0 | 8/3/2011 08:22:01 | 23.137 |
| 12/1/2010 18:23:00 | 32.5 | 8/3/2011 08:58:01 | 23.137 |
| 12/1/2010 18:58:00 | 33.0 | 8/3/2011 09:34:01 | 23.137 |
| 12/1/2010 19:33:00 | 33.5 | 8/3/2011 10:10:01 | 23.137 |
| 12/1/2010 20:08:00 | 34.0 | 8/3/2011 10:46:01 | 23.137 |
| 12/1/2010 20:43:00 | 34.5 | 8/3/2011 11:22:01 | 23.137 |
| 12/1/2010 21:18:00 | 34.5 | 8/3/2011 11:58:01 | 23.137 |
| 12/1/2010 21:53:00 | 34.5 | 8/3/2011 12:34:01 | 23.137 |
| 12/1/2010 22:28:00 | 34.5 | 8/3/2011 13:10:01 | 23.137 |
| 12/1/2010 23:03:00 | 35.0 | 8/3/2011 13:46:01 | 23.137 |
| 12/1/2010 23:38:00 | 34.5 | 8/3/2011 14:22:01 | 23.137 |
| 12/2/2010 00:13:00 | 34.5 | 8/3/2011 14:58:01 | 23.137 |
| 12/2/2010 00:48:00 | 35.0 | 8/3/2011 15:34:01 | 23.137 |
| 12/2/2010 01:23:00 | 35.5 | 8/3/2011 16:10:01 | 23.137 |
| 12/2/2010 01:58:00 | 35.5 | 8/3/2011 16:46:01 | 23.137 |
| 12/2/2010 02:33:00 | 35.0 | 8/3/2011 17:22:01 | 23.137 |
| 12/2/2010 03:08:00 | 35.5 | 8/3/2011 17:58:01 | 23.137 |
| 12/2/2010 03:43:00 | 35.0 | 8/3/2011 18:34:01 | 23.137 |
| 12/2/2010 04:18:00 | 35.0 | 8/3/2011 19:10:01 | 23.137 |
| 12/2/2010 04:53:00 | 34.5 | 8/3/2011 19:46:01 | 23.137 |
| 12/2/2010 05:28:00 | 33.5 | 8/3/2011 20:22:01 | 23.137 |
| 12/2/2010 06:03:00 | 33.0 | 8/3/2011 20:58:01 | 23.137 |
| 12/2/2010 06:38:00 | 33.0 | 8/3/2011 21:34:01 | 23.137 |
| 12/2/2010 07:13:00 | 32.5 | 8/3/2011 22:10:01 | 23.137 |
| 12/2/2010 07:48:00 | 32.0 | 8/3/2011 22:46:01 | 23.137 |
| 12/2/2010 08:23:00 | 32.0 | 8/3/2011 23:22:01 | 23.137 |
| 12/2/2010 08:58:00 | 32.0 | 8/3/2011 23:58:01 | 23.137 |
| 12/2/2010 09:33:00 | 32.0 | 8/4/2011 00:34:01 | 23.137 |
| 12/2/2010 10:08:00 | 32.0 | 8/4/2011 01:10:01 | 23.137 |

|                    |      |                   |        |
|--------------------|------|-------------------|--------|
| 12/2/2010 10:43:00 | 32.0 | 8/4/2011 01:46:01 | 23.637 |
| 12/2/2010 11:18:00 | 32.0 | 8/4/2011 02:22:01 | 23.137 |
| 12/2/2010 11:53:00 | 32.0 | 8/4/2011 02:58:01 | 23.137 |
| 12/2/2010 12:28:00 | 32.5 | 8/4/2011 03:34:01 | 23.137 |
| 12/2/2010 13:03:00 | 33.0 | 8/4/2011 04:10:01 | 23.137 |
| 12/2/2010 13:38:00 | 32.5 | 8/4/2011 04:46:01 | 23.137 |
| 12/2/2010 14:13:00 | 32.5 | 8/4/2011 05:22:01 | 23.137 |
| 12/2/2010 14:48:00 | 32.5 | 8/4/2011 05:58:01 | 23.137 |
| 12/2/2010 15:23:00 | 33.0 | 8/4/2011 06:34:01 | 23.137 |
| 12/2/2010 15:58:00 | 32.5 | 8/4/2011 07:10:01 | 23.137 |
| 12/2/2010 16:33:00 | 32.5 | 8/4/2011 07:46:01 | 23.137 |
| 12/2/2010 17:08:00 | 32.5 | 8/4/2011 08:22:01 | 23.137 |
| 12/2/2010 17:43:00 | 32.5 | 8/4/2011 08:58:01 | 23.137 |
| 12/2/2010 18:18:00 | 32.5 | 8/4/2011 09:34:01 | 23.137 |
| 12/2/2010 18:53:00 | 32.5 | 8/4/2011 10:10:01 | 23.137 |
| 12/2/2010 19:28:00 | 32.5 | 8/4/2011 10:46:01 | 23.137 |
| 12/2/2010 20:03:00 | 33.0 | 8/4/2011 11:22:01 | 23.137 |
| 12/2/2010 20:38:00 | 33.5 | 8/4/2011 11:58:01 | 23.137 |
| 12/2/2010 21:13:00 | 34.0 | 8/4/2011 12:34:01 | 23.137 |
| 12/2/2010 21:48:00 | 34.0 | 8/4/2011 13:10:01 | 23.137 |
| 12/2/2010 22:23:00 | 34.5 | 8/4/2011 13:46:01 | 23.137 |
| 12/2/2010 22:58:00 | 34.5 | 8/4/2011 14:22:01 | 23.137 |
| 12/2/2010 23:33:00 | 34.0 | 8/4/2011 14:58:01 | 23.137 |
| 12/3/2010 00:08:00 | 34.0 | 8/4/2011 15:34:01 | 23.137 |
| 12/3/2010 00:43:00 | 34.5 | 8/4/2011 16:10:01 | 23.137 |
| 12/3/2010 01:18:00 | 34.5 | 8/4/2011 16:46:01 | 23.137 |
| 12/3/2010 01:53:00 | 34.0 | 8/4/2011 17:22:01 | 23.137 |
| 12/3/2010 02:28:00 | 34.5 | 8/4/2011 17:58:01 | 23.137 |
| 12/3/2010 03:03:00 | 34.5 | 8/4/2011 18:34:01 | 23.137 |
| 12/3/2010 03:38:00 | 34.5 | 8/4/2011 19:10:01 | 23.137 |
| 12/3/2010 04:13:00 | 34.0 | 8/4/2011 19:46:01 | 23.137 |
| 12/3/2010 04:48:00 | 34.0 | 8/4/2011 20:22:01 | 23.137 |
| 12/3/2010 05:23:00 | 33.5 | 8/4/2011 20:58:01 | 23.137 |
| 12/3/2010 05:58:00 | 33.5 | 8/4/2011 21:34:01 | 23.137 |
| 12/3/2010 06:33:00 | 34.0 | 8/4/2011 22:10:01 | 23.137 |
| 12/3/2010 07:08:00 | 33.5 | 8/4/2011 22:46:01 | 23.137 |
| 12/3/2010 07:43:00 | 33.5 | 8/4/2011 23:22:01 | 23.137 |
| 12/3/2010 08:18:00 | 33.5 | 8/4/2011 23:58:01 | 23.137 |
| 12/3/2010 08:53:00 | 33.5 | 8/5/2011 00:34:01 | 23.137 |
| 12/3/2010 09:28:00 | 33.0 | 8/5/2011 01:10:01 | 23.137 |
| 12/3/2010 10:03:00 | 33.0 | 8/5/2011 01:46:01 | 23.137 |
| 12/3/2010 10:38:00 | 33.0 | 8/5/2011 02:22:01 | 23.137 |
| 12/3/2010 11:13:00 | 32.5 | 8/5/2011 02:58:01 | 23.137 |
| 12/3/2010 11:48:00 | 32.5 | 8/5/2011 03:34:01 | 23.137 |
| 12/3/2010 12:23:00 | 32.5 | 8/5/2011 04:10:01 | 23.137 |
| 12/3/2010 12:58:00 | 34.0 | 8/5/2011 04:46:01 | 23.137 |
| 12/3/2010 13:33:00 | 33.5 | 8/5/2011 05:22:01 | 23.137 |
| 12/3/2010 14:08:00 | 33.0 | 8/5/2011 05:58:01 | 23.137 |
| 12/3/2010 14:43:00 | 32.5 | 8/5/2011 06:34:01 | 23.137 |
| 12/3/2010 15:18:00 | 32.5 | 8/5/2011 07:10:01 | 23.137 |

|                    |      |                   |        |
|--------------------|------|-------------------|--------|
| 12/3/2010 15:53:00 | 32.0 | 8/5/2011 07:46:01 | 23.137 |
| 12/3/2010 16:28:00 | 32.5 | 8/5/2011 08:22:01 | 23.137 |
| 12/3/2010 17:03:00 | 32.5 | 8/5/2011 08:58:01 | 23.137 |
| 12/3/2010 17:38:00 | 32.5 | 8/5/2011 09:34:01 | 23.137 |
| 12/3/2010 18:13:00 | 32.5 | 8/5/2011 10:10:01 | 23.137 |
| 12/3/2010 18:48:00 | 33.5 | 8/5/2011 10:46:01 | 23.137 |
| 12/3/2010 19:23:00 | 34.0 | 8/5/2011 11:22:01 | 23.137 |
| 12/3/2010 19:58:00 | 34.0 | 8/5/2011 11:58:01 | 23.137 |
| 12/3/2010 20:33:00 | 33.5 | 8/5/2011 12:34:01 | 23.137 |
| 12/3/2010 21:08:00 | 34.0 | 8/5/2011 13:10:01 | 23.137 |
| 12/3/2010 21:43:00 | 34.0 | 8/5/2011 13:46:01 | 23.137 |
| 12/3/2010 22:18:00 | 34.0 | 8/5/2011 14:22:01 | 23.137 |
| 12/3/2010 22:53:00 | 33.5 | 8/5/2011 14:58:01 | 23.137 |
| 12/3/2010 23:28:00 | 34.0 | 8/5/2011 15:34:01 | 23.137 |
| 12/4/2010 00:03:00 | 33.5 | 8/5/2011 16:10:01 | 23.137 |
| 12/4/2010 00:38:00 | 34.5 | 8/5/2011 16:46:01 | 23.137 |
| 12/4/2010 01:13:00 | 34.5 | 8/5/2011 17:22:01 | 23.137 |
| 12/4/2010 01:48:00 | 34.0 | 8/5/2011 17:58:01 | 23.137 |
| 12/4/2010 02:23:00 | 33.5 | 8/5/2011 18:34:01 | 23.137 |
| 12/4/2010 02:58:00 | 33.5 | 8/5/2011 19:10:01 | 23.137 |
| 12/4/2010 03:33:00 | 33.5 | 8/5/2011 19:46:01 | 23.137 |
| 12/4/2010 04:08:00 | 33.0 | 8/5/2011 20:22:01 | 23.137 |
| 12/4/2010 04:43:00 | 33.0 | 8/5/2011 20:58:01 | 23.137 |
| 12/4/2010 05:18:00 | 32.5 | 8/5/2011 21:34:01 | 23.137 |
| 12/4/2010 05:53:00 | 32.5 | 8/5/2011 22:10:01 | 23.137 |
| 12/4/2010 06:28:00 | 32.5 | 8/5/2011 22:46:01 | 23.137 |
| 12/4/2010 07:03:00 | 32.5 | 8/5/2011 23:22:01 | 23.137 |
| 12/4/2010 07:38:00 | 32.5 | 8/5/2011 23:58:01 | 23.137 |
| 12/4/2010 08:13:00 | 32.5 | 8/6/2011 00:34:01 | 23.137 |
| 12/4/2010 08:48:00 | 32.0 | 8/6/2011 01:10:01 | 23.137 |
| 12/4/2010 09:23:00 | 32.0 | 8/6/2011 01:46:01 | 23.137 |
| 12/4/2010 09:58:00 | 32.0 | 8/6/2011 02:22:01 | 23.137 |
| 12/4/2010 10:33:00 | 32.0 | 8/6/2011 02:58:01 | 23.137 |
| 12/4/2010 11:08:00 | 31.5 | 8/6/2011 03:34:01 | 23.137 |
| 12/4/2010 11:43:00 | 31.5 | 8/6/2011 04:10:01 | 23.137 |
| 12/4/2010 12:18:00 | 31.5 | 8/6/2011 04:46:01 | 23.137 |
| 12/4/2010 12:53:00 | 31.5 | 8/6/2011 05:22:01 | 23.137 |
| 12/4/2010 13:28:00 | 32.0 | 8/6/2011 05:58:01 | 23.137 |
| 12/4/2010 14:03:00 | 32.0 | 8/6/2011 06:34:01 | 23.137 |
| 12/4/2010 14:38:00 | 32.0 | 8/6/2011 07:10:01 | 23.137 |
| 12/4/2010 15:13:00 | 32.0 | 8/6/2011 07:46:01 | 23.137 |
| 12/4/2010 15:48:00 | 32.5 | 8/6/2011 08:22:01 | 23.137 |
| 12/4/2010 16:23:00 | 32.5 | 8/6/2011 08:58:01 | 23.137 |
| 12/4/2010 16:58:00 | 32.5 | 8/6/2011 09:34:01 | 23.137 |
| 12/4/2010 17:33:00 | 32.5 | 8/6/2011 10:10:01 | 23.137 |
| 12/4/2010 18:08:00 | 32.5 | 8/6/2011 10:46:01 | 23.137 |
| 12/4/2010 18:43:00 | 32.5 | 8/6/2011 11:22:01 | 23.137 |
| 12/4/2010 19:18:00 | 33.0 | 8/6/2011 11:58:01 | 23.137 |
| 12/4/2010 19:53:00 | 34.0 | 8/6/2011 12:34:01 | 23.137 |
| 12/4/2010 20:28:00 | 34.5 | 8/6/2011 13:10:01 | 23.137 |

|                    |      |                   |        |
|--------------------|------|-------------------|--------|
| 12/4/2010 21:03:00 | 35.0 | 8/6/2011 13:46:01 | 23.137 |
| 12/4/2010 21:38:00 | 35.0 | 8/6/2011 14:22:01 | 23.137 |
| 12/4/2010 22:13:00 | 34.5 | 8/6/2011 14:58:01 | 23.137 |
| 12/4/2010 22:48:00 | 34.5 | 8/6/2011 15:34:01 | 23.137 |
| 12/4/2010 23:23:00 | 34.5 | 8/6/2011 16:10:01 | 23.137 |
| 12/4/2010 23:58:00 | 34.0 | 8/6/2011 16:46:01 | 23.137 |
| 12/5/2010 00:33:00 | 34.0 | 8/6/2011 17:22:01 | 23.137 |
| 12/5/2010 01:08:00 | 34.0 | 8/6/2011 17:58:01 | 23.137 |
| 12/5/2010 01:43:00 | 34.0 | 8/6/2011 18:34:01 | 23.137 |
| 12/5/2010 02:18:00 | 34.0 | 8/6/2011 19:10:01 | 23.137 |
| 12/5/2010 02:53:00 | 34.0 | 8/6/2011 19:46:01 | 23.137 |
| 12/5/2010 03:28:00 | 33.5 | 8/6/2011 20:22:01 | 23.137 |
| 12/5/2010 04:03:00 | 33.0 | 8/6/2011 20:58:01 | 23.137 |
| 12/5/2010 04:38:00 | 33.0 | 8/6/2011 21:34:01 | 23.137 |
| 12/5/2010 05:13:00 | 33.0 | 8/6/2011 22:10:01 | 23.137 |
| 12/5/2010 05:48:00 | 32.5 | 8/6/2011 22:46:01 | 23.137 |
| 12/5/2010 06:23:00 | 32.5 | 8/6/2011 23:22:01 | 23.137 |
| 12/5/2010 06:58:00 | 32.5 | 8/6/2011 23:58:01 | 23.137 |
| 12/5/2010 07:33:00 | 32.5 | 8/7/2011 00:34:01 | 23.137 |
| 12/5/2010 08:08:00 | 32.5 | 8/7/2011 01:10:01 | 23.137 |
| 12/5/2010 08:43:00 | 33.0 | 8/7/2011 01:46:01 | 23.137 |
| 12/5/2010 09:18:00 | 33.0 | 8/7/2011 02:22:01 | 23.137 |
| 12/5/2010 09:53:00 | 32.5 | 8/7/2011 02:58:01 | 23.137 |
| 12/5/2010 10:28:00 | 32.5 | 8/7/2011 03:34:01 | 23.137 |
| 12/5/2010 11:03:00 | 32.0 | 8/7/2011 04:10:01 | 23.137 |
| 12/5/2010 11:38:00 | 32.5 | 8/7/2011 04:46:01 | 23.137 |
| 12/5/2010 12:13:00 | 32.5 | 8/7/2011 05:22:01 | 23.137 |
| 12/5/2010 12:48:00 | 32.0 | 8/7/2011 05:58:01 | 23.137 |
| 12/5/2010 13:23:00 | 32.0 | 8/7/2011 06:34:01 | 23.137 |
| 12/5/2010 13:58:00 | 32.0 | 8/7/2011 07:10:01 | 23.137 |
| 12/5/2010 14:33:00 | 32.0 | 8/7/2011 07:46:01 | 23.137 |
| 12/5/2010 15:08:00 | 32.0 | 8/7/2011 08:22:01 | 23.137 |
| 12/5/2010 15:43:00 | 32.0 | 8/7/2011 08:58:01 | 23.137 |
| 12/5/2010 16:18:00 | 32.0 | 8/7/2011 09:34:01 | 23.137 |
| 12/5/2010 16:53:00 | 32.0 | 8/7/2011 10:10:01 | 23.137 |
| 12/5/2010 17:28:00 | 32.0 | 8/7/2011 10:46:01 | 23.137 |
| 12/5/2010 18:03:00 | 32.0 | 8/7/2011 11:22:01 | 23.137 |
| 12/5/2010 18:38:00 | 32.0 | 8/7/2011 11:58:01 | 23.137 |
| 12/5/2010 19:13:00 | 32.0 | 8/7/2011 12:34:01 | 23.137 |
| 12/5/2010 19:48:00 | 34.0 | 8/7/2011 13:10:01 | 23.137 |
| 12/5/2010 20:23:00 | 34.5 | 8/7/2011 13:46:01 | 23.137 |
| 12/5/2010 20:58:00 | 34.5 | 8/7/2011 14:22:01 | 23.137 |
| 12/5/2010 21:33:00 | 34.0 | 8/7/2011 14:58:01 | 23.137 |
| 12/5/2010 22:08:00 | 34.0 | 8/7/2011 15:34:01 | 23.137 |
| 12/5/2010 22:43:00 | 34.0 | 8/7/2011 16:10:01 | 23.137 |
| 12/5/2010 23:18:00 | 34.5 | 8/7/2011 16:46:01 | 23.137 |
| 12/5/2010 23:53:00 | 34.0 | 8/7/2011 17:22:01 | 23.137 |
| 12/6/2010 00:28:00 | 33.5 | 8/7/2011 17:58:01 | 23.137 |
| 12/6/2010 01:03:00 | 33.5 | 8/7/2011 18:34:01 | 23.137 |
| 12/6/2010 01:38:00 | 34.0 | 8/7/2011 19:10:01 | 23.137 |

|                    |      |                   |        |
|--------------------|------|-------------------|--------|
| 12/6/2010 02:13:00 | 34.0 | 8/7/2011 19:46:01 | 23.137 |
| 12/6/2010 02:48:00 | 34.5 | 8/7/2011 20:22:01 | 23.137 |
| 12/6/2010 03:23:00 | 34.0 | 8/7/2011 20:58:01 | 23.137 |
| 12/6/2010 03:58:00 | 34.0 | 8/7/2011 21:34:01 | 23.637 |
| 12/6/2010 04:33:00 | 33.5 | 8/7/2011 22:10:01 | 23.637 |
| 12/6/2010 05:08:00 | 33.5 | 8/7/2011 22:46:01 | 23.637 |
| 12/6/2010 05:43:00 | 33.0 | 8/7/2011 23:22:01 | 23.637 |
| 12/6/2010 06:18:00 | 32.5 | 8/7/2011 23:58:01 | 23.637 |
| 12/6/2010 06:53:00 | 32.5 | 8/8/2011 00:34:01 | 23.637 |
| 12/6/2010 07:28:00 | 33.0 | 8/8/2011 01:10:01 | 23.137 |
| 12/6/2010 08:03:00 | 33.0 | 8/8/2011 01:46:01 | 23.637 |
| 12/6/2010 08:38:00 | 32.5 | 8/8/2011 02:22:01 | 23.637 |
| 12/6/2010 09:13:00 | 32.5 | 8/8/2011 02:58:01 | 23.637 |
| 12/6/2010 09:48:00 | 32.5 | 8/8/2011 03:34:01 | 23.637 |
| 12/6/2010 10:23:00 | 32.5 | 8/8/2011 04:10:01 | 23.637 |
| 12/6/2010 10:58:00 | 32.5 | 8/8/2011 04:46:01 | 23.637 |
| 12/6/2010 11:33:00 | 32.5 | 8/8/2011 05:22:01 | 23.637 |
| 12/6/2010 12:08:00 | 32.5 | 8/8/2011 05:58:01 | 23.637 |
| 12/6/2010 12:43:00 | 32.5 | 8/8/2011 06:34:01 | 23.637 |
| 12/6/2010 13:18:00 | 33.0 | 8/8/2011 07:10:01 | 23.637 |
| 12/6/2010 13:53:00 | 33.0 | 8/8/2011 07:46:01 | 23.637 |
| 12/6/2010 14:28:00 | 33.0 | 8/8/2011 08:22:01 | 23.637 |
| 12/6/2010 15:03:00 | 33.0 | 8/8/2011 08:58:01 | 23.637 |
| 12/6/2010 15:38:00 | 33.0 | 8/8/2011 09:34:01 | 23.637 |
| 12/6/2010 16:13:00 | 33.0 | 8/8/2011 10:10:01 | 23.637 |
| 12/6/2010 16:48:00 | 33.0 | 8/8/2011 10:46:01 | 23.137 |
| 12/6/2010 17:23:00 | 33.0 | 8/8/2011 11:22:01 | 23.137 |
| 12/6/2010 17:58:00 | 33.0 | 8/8/2011 11:58:01 | 23.137 |
| 12/6/2010 18:33:00 | 33.0 | 8/8/2011 12:34:01 | 23.137 |
| 12/6/2010 19:08:00 | 33.0 | 8/8/2011 13:10:01 | 23.137 |
| 12/6/2010 19:43:00 | 33.5 | 8/8/2011 13:46:01 | 23.137 |
| 12/6/2010 20:18:00 | 33.0 | 8/8/2011 14:22:01 | 23.137 |
| 12/6/2010 20:53:00 | 33.5 | 8/8/2011 14:58:01 | 23.137 |
| 12/6/2010 21:28:00 | 34.0 | 8/8/2011 15:34:01 | 23.137 |
| 12/6/2010 22:03:00 | 34.0 | 8/8/2011 16:10:01 | 23.137 |
| 12/6/2010 22:38:00 | 34.5 | 8/8/2011 16:46:01 | 23.137 |
| 12/6/2010 23:13:00 | 34.5 | 8/8/2011 17:22:01 | 23.137 |
| 12/6/2010 23:48:00 | 34.5 | 8/8/2011 17:58:01 | 23.137 |
| 12/7/2010 00:23:00 | 34.0 | 8/8/2011 18:34:01 | 23.137 |
| 12/7/2010 00:58:00 | 34.5 | 8/8/2011 19:10:01 | 23.137 |
| 12/7/2010 01:33:00 | 34.0 | 8/8/2011 19:46:01 | 23.137 |
| 12/7/2010 02:08:00 | 34.0 | 8/8/2011 20:22:01 | 23.137 |
| 12/7/2010 02:43:00 | 33.5 | 8/8/2011 20:58:01 | 23.137 |
| 12/7/2010 03:18:00 | 33.5 | 8/8/2011 21:34:01 | 23.137 |
| 12/7/2010 03:53:00 | 33.5 | 8/8/2011 22:10:01 | 23.137 |
| 12/7/2010 04:28:00 | 34.0 | 8/8/2011 22:46:01 | 23.137 |
| 12/7/2010 05:03:00 | 34.0 | 8/8/2011 23:22:01 | 23.137 |
| 12/7/2010 05:38:00 | 34.0 | 8/8/2011 23:58:01 | 23.137 |
| 12/7/2010 06:13:00 | 34.0 | 8/9/2011 00:34:01 | 23.137 |
| 12/7/2010 06:48:00 | 33.5 | 8/9/2011 01:10:01 | 23.137 |



|                    |      |                    |        |
|--------------------|------|--------------------|--------|
| 12/7/2010 07:23:00 | 33.5 | 8/9/2011 01:46:01  | 23.137 |
| 12/7/2010 07:58:00 | 34.0 | 8/9/2011 02:22:01  | 23.137 |
| 12/7/2010 08:33:00 | 34.0 | 8/9/2011 02:58:01  | 23.137 |
| 12/7/2010 09:08:00 | 33.5 | 8/9/2011 03:34:01  | 23.137 |
| 12/7/2010 09:43:00 | 33.0 | 8/9/2011 04:10:01  | 23.137 |
| 12/7/2010 10:18:00 | 32.5 | 8/9/2011 04:46:01  | 23.137 |
| 12/7/2010 10:53:00 | 32.5 | 8/9/2011 05:22:01  | 23.137 |
| 12/7/2010 11:28:00 | 32.5 | 8/9/2011 05:58:01  | 23.137 |
| 12/7/2010 12:03:00 | 32.0 | 8/9/2011 06:34:01  | 23.137 |
| 12/7/2010 12:38:00 | 32.0 | 8/9/2011 07:10:01  | 23.137 |
| 12/7/2010 13:13:00 | 32.5 | 8/9/2011 07:46:01  | 23.137 |
| 12/7/2010 13:48:00 | 32.5 | 8/9/2011 08:22:01  | 23.137 |
| 12/7/2010 14:23:00 | 32.5 | 8/9/2011 08:58:01  | 23.137 |
| 12/7/2010 14:58:00 | 32.5 | 8/9/2011 09:34:01  | 23.137 |
| 12/7/2010 15:33:00 | 32.5 | 8/9/2011 10:10:01  | 23.137 |
| 12/7/2010 16:08:00 | 32.5 | 8/9/2011 10:46:01  | 23.137 |
| 12/7/2010 16:43:00 | 32.5 | 8/9/2011 11:22:01  | 23.137 |
| 12/7/2010 17:18:00 | 32.5 | 8/9/2011 11:58:01  | 23.137 |
| 12/7/2010 17:53:00 | 32.0 | 8/9/2011 12:34:01  | 23.137 |
| 12/7/2010 18:28:00 | 32.0 | 8/9/2011 13:10:01  | 23.137 |
| 12/7/2010 19:03:00 | 32.0 | 8/9/2011 13:46:01  | 23.137 |
| 12/7/2010 19:38:00 | 32.0 | 8/9/2011 14:22:01  | 23.137 |
| 12/7/2010 20:13:00 | 32.5 | 8/9/2011 14:58:01  | 23.137 |
| 12/7/2010 20:48:00 | 32.0 | 8/9/2011 15:34:01  | 23.137 |
| 12/7/2010 21:23:00 | 33.0 | 8/9/2011 16:10:01  | 23.137 |
| 12/7/2010 21:58:00 | 33.5 | 8/9/2011 16:46:01  | 23.137 |
| 12/7/2010 22:33:00 | 33.5 | 8/9/2011 17:22:01  | 23.137 |
| 12/7/2010 23:08:00 | 33.5 | 8/9/2011 17:58:01  | 23.137 |
| 12/7/2010 23:43:00 | 33.0 | 8/9/2011 18:34:01  | 23.137 |
| 12/8/2010 00:18:00 | 33.0 | 8/9/2011 19:10:01  | 23.137 |
| 12/8/2010 00:53:00 | 33.0 | 8/9/2011 19:46:01  | 23.137 |
| 12/8/2010 01:28:00 | 33.0 | 8/9/2011 20:22:01  | 23.137 |
| 12/8/2010 02:03:00 | 33.5 | 8/9/2011 20:58:01  | 23.137 |
| 12/8/2010 02:38:00 | 33.5 | 8/9/2011 21:34:01  | 23.137 |
| 12/8/2010 03:13:00 | 33.5 | 8/9/2011 22:10:01  | 23.137 |
| 12/8/2010 03:48:00 | 33.5 | 8/9/2011 22:46:01  | 23.137 |
| 12/8/2010 04:23:00 | 33.5 | 8/9/2011 23:22:01  | 23.137 |
| 12/8/2010 04:58:00 | 33.5 | 8/9/2011 23:58:01  | 23.137 |
| 12/8/2010 05:33:00 | 33.0 | 8/10/2011 00:34:01 | 23.137 |
| 12/8/2010 06:08:00 | 33.5 | 8/10/2011 01:10:01 | 23.137 |
| 12/8/2010 06:43:00 | 33.0 | 8/10/2011 01:46:01 | 23.137 |
| 12/8/2010 07:18:00 | 33.0 | 8/10/2011 02:22:01 | 23.137 |
| 12/8/2010 07:53:00 | 32.5 | 8/10/2011 02:58:01 | 23.137 |
| 12/8/2010 08:28:00 | 32.5 | 8/10/2011 03:34:01 | 23.137 |
| 12/8/2010 09:03:00 | 32.5 | 8/10/2011 04:10:01 | 23.137 |
| 12/8/2010 09:38:00 | 33.0 | 8/10/2011 04:46:01 | 23.137 |
| 12/8/2010 10:13:00 | 32.5 | 8/10/2011 05:22:01 | 23.137 |
| 12/8/2010 10:48:00 | 33.0 | 8/10/2011 05:58:01 | 23.137 |
| 12/8/2010 11:23:00 | 33.0 | 8/10/2011 06:34:01 | 23.137 |
| 12/8/2010 11:58:00 | 32.5 | 8/10/2011 07:10:01 | 23.137 |

|                    |      |                    |        |
|--------------------|------|--------------------|--------|
| 12/8/2010 12:33:00 | 32.5 | 8/10/2011 07:46:01 | 23.137 |
| 12/8/2010 13:08:00 | 30.0 | 8/10/2011 08:22:01 | 23.137 |
| 12/8/2010 13:43:00 | 27.0 | 8/10/2011 08:58:01 | 23.137 |
| 12/8/2010 14:18:00 | 29.5 | 8/10/2011 09:34:01 | 23.137 |
| 12/8/2010 14:53:00 | 30.5 | 8/10/2011 10:10:01 | 23.137 |
| 12/8/2010 15:28:00 | 31.0 | 8/10/2011 10:46:01 | 23.137 |
| 12/8/2010 16:03:00 | 30.5 | 8/10/2011 11:22:01 | 23.137 |
| 12/8/2010 16:38:00 | 30.5 | 8/10/2011 11:58:01 | 23.137 |
| 12/8/2010 17:13:00 | 30.5 | 8/10/2011 12:34:01 | 23.137 |
| 12/8/2010 17:48:00 | 30.0 | 8/10/2011 13:10:01 | 23.137 |
| 12/8/2010 18:23:00 | 30.0 | 8/10/2011 13:46:01 | 23.137 |
| 12/8/2010 18:58:00 | 30.0 | 8/10/2011 14:22:01 | 23.137 |
| 12/8/2010 19:33:00 | 30.0 | 8/10/2011 14:58:01 | 23.137 |
| 12/8/2010 20:08:00 | 29.5 | 8/10/2011 15:34:01 | 23.137 |
| 12/8/2010 20:43:00 | 29.0 | 8/10/2011 16:10:01 | 23.137 |
| 12/8/2010 21:18:00 | 29.0 | 8/10/2011 16:46:01 | 23.137 |
| 12/8/2010 21:53:00 | 28.5 | 8/10/2011 17:22:01 | 23.137 |
| 12/8/2010 22:28:00 | 28.5 | 8/10/2011 17:58:01 | 23.137 |
| 12/8/2010 23:03:00 | 28.0 | 8/10/2011 18:34:01 | 23.137 |
| 12/8/2010 23:38:00 | 28.0 | 8/10/2011 19:10:01 | 23.137 |
| 12/9/2010 00:13:00 | 27.5 | 8/10/2011 19:46:01 | 23.137 |
| 12/9/2010 00:48:00 | 27.5 | 8/10/2011 20:22:01 | 23.137 |
| 12/9/2010 01:23:00 | 27.5 | 8/10/2011 20:58:01 | 23.137 |
| 12/9/2010 01:58:00 | 27.5 | 8/10/2011 21:34:01 | 23.137 |
| 12/9/2010 02:33:00 | 27.5 | 8/10/2011 22:10:01 | 23.137 |
| 12/9/2010 03:08:00 | 27.5 | 8/10/2011 22:46:01 | 23.137 |
| 12/9/2010 03:43:00 | 27.0 | 8/10/2011 23:22:01 | 23.137 |
| 12/9/2010 04:18:00 | 27.0 | 8/10/2011 23:58:01 | 23.137 |
| 12/9/2010 04:53:00 | 26.5 | 8/11/2011 00:34:01 | 23.137 |
| 12/9/2010 05:28:00 | 26.5 | 8/11/2011 01:10:01 | 23.137 |
| 12/9/2010 06:03:00 | 26.5 | 8/11/2011 01:46:01 | 23.137 |
| 12/9/2010 06:38:00 | 26.5 | 8/11/2011 02:22:01 | 23.137 |
| 12/9/2010 07:13:00 | 26.5 | 8/11/2011 02:58:01 | 23.137 |
| 12/9/2010 07:48:00 | 26.5 | 8/11/2011 03:34:01 | 23.137 |
| 12/9/2010 08:23:00 | 26.5 | 8/11/2011 04:10:01 | 23.137 |
| 12/9/2010 08:58:00 | 27.0 | 8/11/2011 04:46:01 | 23.137 |
| 12/9/2010 09:33:00 | 27.0 | 8/11/2011 05:22:01 | 23.137 |
| 12/9/2010 10:08:00 | 27.0 | 8/11/2011 05:58:01 | 23.137 |
| 12/9/2010 10:43:00 | 28.0 | 8/11/2011 06:34:01 | 23.137 |
| 12/9/2010 11:18:00 | 29.0 | 8/11/2011 07:10:01 | 23.137 |
| 12/9/2010 11:53:00 | 29.0 | 8/11/2011 07:46:01 | 23.137 |
| 12/9/2010 12:28:00 | 29.5 | 8/11/2011 08:22:01 | 23.137 |
| 12/9/2010 13:03:00 | 30.0 | 8/11/2011 08:58:01 | 23.137 |
| 12/9/2010 13:38:00 | 30.5 | 8/11/2011 09:34:01 | 23.137 |
| 12/9/2010 14:13:00 | 31.0 | 8/11/2011 10:10:01 | 23.137 |
| 12/9/2010 14:48:00 | 30.5 | 8/11/2011 10:46:01 | 23.137 |
| 12/9/2010 15:23:00 | 30.5 | 8/11/2011 11:22:01 | 23.137 |
| 12/9/2010 15:58:00 | 30.5 | 8/11/2011 11:58:01 | 23.137 |
| 12/9/2010 16:33:00 | 30.5 | 8/11/2011 12:34:01 | 23.137 |
| 12/9/2010 17:08:00 | 30.5 | 8/11/2011 13:10:01 | 23.137 |

|                     |      |                    |        |
|---------------------|------|--------------------|--------|
| 12/9/2010 17:43:00  | 30.5 | 8/11/2011 13:46:01 | 23.137 |
| 12/9/2010 18:18:00  | 30.5 | 8/11/2011 14:22:01 | 23.137 |
| 12/9/2010 18:53:00  | 30.0 | 8/11/2011 14:58:01 | 23.137 |
| 12/9/2010 19:28:00  | 29.5 | 8/11/2011 15:34:01 | 23.137 |
| 12/9/2010 20:03:00  | 29.5 | 8/11/2011 16:10:01 | 23.137 |
| 12/9/2010 20:38:00  | 29.0 | 8/11/2011 16:46:01 | 23.137 |
| 12/9/2010 21:13:00  | 28.5 | 8/11/2011 17:22:01 | 23.137 |
| 12/9/2010 21:48:00  | 29.0 | 8/11/2011 17:58:01 | 23.137 |
| 12/9/2010 22:23:00  | 28.5 | 8/11/2011 18:34:01 | 23.137 |
| 12/9/2010 22:58:00  | 28.5 | 8/11/2011 19:10:01 | 23.137 |
| 12/9/2010 23:33:00  | 28.0 | 8/11/2011 19:46:01 | 23.137 |
| 12/10/2010 00:08:00 | 27.5 | 8/11/2011 20:22:01 | 23.137 |
| 12/10/2010 00:43:00 | 27.5 | 8/11/2011 20:58:01 | 23.137 |
| 12/10/2010 01:18:00 | 27.5 | 8/11/2011 21:34:01 | 23.137 |
| 12/10/2010 01:53:00 | 27.0 | 8/11/2011 22:10:01 | 23.137 |
| 12/10/2010 02:28:00 | 27.0 | 8/11/2011 22:46:01 | 23.137 |
| 12/10/2010 03:03:00 | 26.5 | 8/11/2011 23:22:01 | 23.137 |
| 12/10/2010 03:38:00 | 26.5 | 8/11/2011 23:58:01 | 23.137 |
| 12/10/2010 04:13:00 | 26.0 | 8/12/2011 00:34:01 | 23.137 |
| 12/10/2010 04:48:00 | 26.0 | 8/12/2011 01:10:01 | 23.137 |
| 12/10/2010 05:23:00 | 26.0 | 8/12/2011 01:46:01 | 23.137 |
| 12/10/2010 05:58:00 | 26.0 | 8/12/2011 02:22:01 | 23.137 |
| 12/10/2010 06:33:00 | 26.0 | 8/12/2011 02:58:01 | 23.137 |
| 12/10/2010 07:08:00 | 26.0 | 8/12/2011 03:34:01 | 23.137 |
| 12/10/2010 07:43:00 | 26.0 | 8/12/2011 04:10:01 | 23.137 |
| 12/10/2010 08:18:00 | 26.0 | 8/12/2011 04:46:01 | 23.137 |
| 12/10/2010 08:53:00 | 26.0 | 8/12/2011 05:22:01 | 23.137 |
| 12/10/2010 09:28:00 | 26.5 | 8/12/2011 05:58:01 | 23.137 |
| 12/10/2010 10:03:00 | 26.5 | 8/12/2011 06:34:01 | 23.137 |
| 12/10/2010 10:38:00 | 27.0 | 8/12/2011 07:10:01 | 23.137 |
| 12/10/2010 11:13:00 | 27.5 | 8/12/2011 07:46:01 | 23.137 |
| 12/10/2010 11:48:00 | 28.0 | 8/12/2011 08:22:01 | 23.137 |
| 12/10/2010 12:23:00 | 28.0 | 8/12/2011 08:58:01 | 23.137 |
| 12/10/2010 12:58:00 | 28.0 | 8/12/2011 09:34:01 | 23.137 |
| 12/10/2010 13:33:00 | 28.0 | 8/12/2011 10:10:01 | 23.137 |
| 12/10/2010 14:08:00 | 28.0 | 8/12/2011 10:46:01 | 23.137 |
| 12/10/2010 14:43:00 | 28.0 | 8/12/2011 11:22:01 | 23.137 |
| 12/10/2010 15:18:00 | 28.5 | 8/12/2011 11:58:01 | 23.137 |
| 12/10/2010 15:53:00 | 28.5 | 8/12/2011 12:34:01 | 23.137 |
| 12/10/2010 16:28:00 | 28.5 | 8/12/2011 13:10:01 | 23.137 |
| 12/10/2010 17:03:00 | 28.5 | 8/12/2011 13:46:01 | 23.137 |
| 12/10/2010 17:38:00 | 28.5 | 8/12/2011 14:22:01 | 23.137 |
| 12/10/2010 18:13:00 | 28.5 | 8/12/2011 14:58:01 | 23.137 |
| 12/10/2010 18:48:00 | 28.5 | 8/12/2011 15:34:01 | 23.137 |
| 12/10/2010 19:23:00 | 28.0 | 8/12/2011 16:10:01 | 23.137 |
| 12/10/2010 19:58:00 | 27.5 | 8/12/2011 16:46:01 | 23.137 |
| 12/10/2010 20:33:00 | 27.5 | 8/12/2011 17:22:01 | 23.137 |
| 12/10/2010 21:08:00 | 27.0 | 8/12/2011 17:58:01 | 23.137 |
| 12/10/2010 21:43:00 | 26.5 | 8/12/2011 18:34:01 | 23.137 |
| 12/10/2010 22:18:00 | 26.5 | 8/12/2011 19:10:01 | 23.137 |

|                     |      |                    |        |
|---------------------|------|--------------------|--------|
| 12/10/2010 22:53:00 | 26.5 | 8/12/2011 19:46:01 | 23.137 |
| 12/10/2010 23:28:00 | 26.0 | 8/12/2011 20:22:01 | 23.137 |
| 12/11/2010 00:03:00 | 26.0 | 8/12/2011 20:58:01 | 23.137 |
| 12/11/2010 00:38:00 | 26.0 | 8/12/2011 21:34:01 | 23.137 |
| 12/11/2010 01:13:00 | 26.0 | 8/12/2011 22:10:01 | 23.137 |
| 12/11/2010 01:48:00 | 26.0 | 8/12/2011 22:46:01 | 23.137 |
| 12/11/2010 02:23:00 | 26.0 | 8/12/2011 23:22:01 | 23.137 |
| 12/11/2010 02:58:00 | 26.0 | 8/12/2011 23:58:01 | 23.137 |
| 12/11/2010 03:33:00 | 25.5 | 8/13/2011 00:34:01 | 23.137 |
| 12/11/2010 04:08:00 | 25.5 | 8/13/2011 01:10:01 | 23.137 |
| 12/11/2010 04:43:00 | 25.5 | 8/13/2011 01:46:01 | 23.137 |
| 12/11/2010 05:18:00 | 25.5 | 8/13/2011 02:22:01 | 23.137 |
| 12/11/2010 05:53:00 | 25.5 | 8/13/2011 02:58:01 | 23.137 |
| 12/11/2010 06:28:00 | 25.5 | 8/13/2011 03:34:01 | 23.137 |
| 12/11/2010 07:03:00 | 25.5 | 8/13/2011 04:10:01 | 23.137 |
| 12/11/2010 07:38:00 | 26.0 | 8/13/2011 04:46:01 | 23.137 |
| 12/11/2010 08:13:00 | 26.0 | 8/13/2011 05:22:01 | 23.137 |
| 12/11/2010 08:48:00 | 26.5 | 8/13/2011 05:58:01 | 23.137 |
| 12/11/2010 09:23:00 | 27.0 | 8/13/2011 06:34:01 | 23.137 |
| 12/11/2010 09:58:00 | 27.5 | 8/13/2011 07:10:01 | 23.137 |
| 12/11/2010 10:33:00 | 28.0 | 8/13/2011 07:46:01 | 23.137 |
| 12/11/2010 11:08:00 | 28.5 | 8/13/2011 08:22:01 | 23.137 |
| 12/11/2010 11:43:00 | 28.5 | 8/13/2011 08:58:01 | 23.137 |
| 12/11/2010 12:18:00 | 28.5 | 8/13/2011 09:34:01 | 23.137 |
| 12/11/2010 12:53:00 | 29.0 | 8/13/2011 10:10:01 | 23.137 |
| 12/11/2010 13:28:00 | 29.0 | 8/13/2011 10:46:01 | 23.137 |
| 12/11/2010 14:03:00 | 30.0 | 8/13/2011 11:22:01 | 23.137 |
| 12/11/2010 14:38:00 | 30.0 | 8/13/2011 11:58:01 | 23.137 |
| 12/11/2010 15:13:00 | 30.0 | 8/13/2011 12:34:01 | 23.137 |
| 12/11/2010 15:48:00 | 30.0 | 8/13/2011 13:10:01 | 23.137 |
| 12/11/2010 16:23:00 | 30.0 | 8/13/2011 13:46:01 | 23.137 |
| 12/11/2010 16:58:00 | 30.0 | 8/13/2011 14:22:01 | 23.137 |
| 12/11/2010 17:33:00 | 30.0 | 8/13/2011 14:58:01 | 23.137 |
| 12/11/2010 18:08:00 | 30.0 | 8/13/2011 15:34:01 | 23.137 |
| 12/11/2010 18:43:00 | 30.0 | 8/13/2011 16:10:01 | 23.137 |
| 12/11/2010 19:18:00 | 29.5 | 8/13/2011 16:46:01 | 23.137 |
| 12/11/2010 19:53:00 | 29.5 | 8/13/2011 17:22:01 | 23.137 |
| 12/11/2010 20:28:00 | 29.0 | 8/13/2011 17:58:01 | 23.137 |
| 12/11/2010 21:03:00 | 29.0 | 8/13/2011 18:34:01 | 23.137 |
| 12/11/2010 21:38:00 | 28.5 | 8/13/2011 19:10:01 | 23.137 |
| 12/11/2010 22:13:00 | 28.5 | 8/13/2011 19:46:01 | 23.137 |
| 12/11/2010 22:48:00 | 28.0 | 8/13/2011 20:22:01 | 23.137 |
| 12/11/2010 23:23:00 | 28.0 | 8/13/2011 20:58:01 | 23.137 |
| 12/11/2010 23:58:00 | 27.5 | 8/13/2011 21:34:01 | 23.137 |
| 12/12/2010 00:33:00 | 27.5 | 8/13/2011 22:10:01 | 23.137 |
| 12/12/2010 01:08:00 | 27.5 | 8/13/2011 22:46:01 | 23.137 |
| 12/12/2010 01:43:00 | 27.5 | 8/13/2011 23:22:01 | 23.137 |
| 12/12/2010 02:18:00 | 27.0 | 8/13/2011 23:58:01 | 23.137 |
| 12/12/2010 02:53:00 | 27.0 | 8/14/2011 00:34:01 | 23.137 |
| 12/12/2010 03:28:00 | 27.0 | 8/14/2011 01:10:01 | 23.137 |

|                     |      |                    |        |
|---------------------|------|--------------------|--------|
| 12/12/2010 04:03:00 | 27.0 | 8/14/2011 01:46:01 | 23.137 |
| 12/12/2010 04:38:00 | 27.0 | 8/14/2011 02:22:01 | 23.137 |
| 12/12/2010 05:13:00 | 26.5 | 8/14/2011 02:58:01 | 23.137 |
| 12/12/2010 05:48:00 | 26.5 | 8/14/2011 03:34:01 | 23.137 |
| 12/12/2010 06:23:00 | 26.5 | 8/14/2011 04:10:01 | 23.137 |
| 12/12/2010 06:58:00 | 26.5 | 8/14/2011 04:46:01 | 23.137 |
| 12/12/2010 07:33:00 | 27.0 | 8/14/2011 05:22:01 | 23.137 |
| 12/12/2010 08:08:00 | 27.0 | 8/14/2011 05:58:01 | 23.137 |
| 12/12/2010 08:43:00 | 27.5 | 8/14/2011 06:34:01 | 23.137 |
| 12/12/2010 09:18:00 | 28.0 | 8/14/2011 07:10:01 | 23.137 |
| 12/12/2010 09:53:00 | 28.5 | 8/14/2011 07:46:01 | 23.137 |
| 12/12/2010 10:28:00 | 28.5 | 8/14/2011 08:22:01 | 23.137 |
| 12/12/2010 11:03:00 | 29.0 | 8/14/2011 08:58:01 | 23.137 |
| 12/12/2010 11:38:00 | 29.5 | 8/14/2011 09:34:01 | 23.137 |
| 12/12/2010 12:13:00 | 29.5 | 8/14/2011 10:10:01 | 23.137 |
| 12/12/2010 12:48:00 | 29.5 | 8/14/2011 10:46:01 | 23.137 |
| 12/12/2010 13:23:00 | 30.0 | 8/14/2011 11:22:01 | 23.137 |
| 12/12/2010 13:58:00 | 30.0 | 8/14/2011 11:58:01 | 23.137 |
| 12/12/2010 14:33:00 | 30.0 | 8/14/2011 12:34:01 | 23.137 |
| 12/12/2010 15:08:00 | 30.0 | 8/14/2011 13:10:01 | 23.137 |
| 12/12/2010 15:43:00 | 30.5 | 8/14/2011 13:46:01 | 23.137 |
| 12/12/2010 16:18:00 | 30.5 | 8/14/2011 14:22:01 | 23.137 |
| 12/12/2010 16:53:00 | 30.5 | 8/14/2011 14:58:01 | 23.137 |
| 12/12/2010 17:28:00 | 31.0 | 8/14/2011 15:34:01 | 23.137 |
| 12/12/2010 18:03:00 | 31.0 | 8/14/2011 16:10:01 | 23.137 |
| 12/12/2010 18:38:00 | 31.0 | 8/14/2011 16:46:01 | 23.137 |
| 12/12/2010 19:13:00 | 30.5 | 8/14/2011 17:22:01 | 23.137 |
| 12/12/2010 19:48:00 | 30.0 | 8/14/2011 17:58:01 | 23.137 |
| 12/12/2010 20:23:00 | 30.0 | 8/14/2011 18:34:01 | 23.137 |
| 12/12/2010 20:58:00 | 29.5 | 8/14/2011 19:10:01 | 23.137 |
| 12/12/2010 21:33:00 | 29.5 | 8/14/2011 19:46:01 | 23.137 |
| 12/12/2010 22:08:00 | 29.0 | 8/14/2011 20:22:01 | 23.137 |
| 12/12/2010 22:43:00 | 29.0 | 8/14/2011 20:58:01 | 23.137 |
| 12/12/2010 23:18:00 | 29.0 | 8/14/2011 21:34:01 | 23.137 |
| 12/12/2010 23:53:00 | 28.5 | 8/14/2011 22:10:01 | 23.137 |
| 12/13/2010 00:28:00 | 28.5 | 8/14/2011 22:46:01 | 23.137 |
| 12/13/2010 01:03:00 | 28.5 | 8/14/2011 23:22:01 | 23.137 |
| 12/13/2010 01:38:00 | 28.0 | 8/14/2011 23:58:01 | 23.137 |
| 12/13/2010 02:13:00 | 28.0 | 8/15/2011 00:34:01 | 23.137 |
| 12/13/2010 02:48:00 | 28.0 | 8/15/2011 01:10:01 | 23.137 |
| 12/13/2010 03:23:00 | 27.5 | 8/15/2011 01:46:01 | 23.137 |
| 12/13/2010 03:58:00 | 27.5 | 8/15/2011 02:22:01 | 23.137 |
| 12/13/2010 04:33:00 | 27.5 | 8/15/2011 02:58:01 | 23.137 |
| 12/13/2010 05:08:00 | 27.5 | 8/15/2011 03:34:01 | 23.137 |
| 12/13/2010 05:43:00 | 27.5 | 8/15/2011 04:10:01 | 23.137 |
| 12/13/2010 06:18:00 | 27.5 | 8/15/2011 04:46:01 | 23.137 |
| 12/13/2010 06:53:00 | 27.5 | 8/15/2011 05:22:01 | 23.137 |
| 12/13/2010 07:28:00 | 28.0 | 8/15/2011 05:58:01 | 23.137 |
| 12/13/2010 08:03:00 | 28.0 | 8/15/2011 06:34:01 | 23.137 |
| 12/13/2010 08:38:00 | 28.5 | 8/15/2011 07:10:01 | 23.137 |

|                     |      |                    |        |
|---------------------|------|--------------------|--------|
| 12/13/2010 09:13:00 | 28.5 | 8/15/2011 07:46:01 | 23.137 |
| 12/13/2010 09:48:00 | 28.5 | 8/15/2011 08:22:01 | 23.137 |
| 12/13/2010 10:23:00 | 29.0 | 8/15/2011 08:58:01 | 23.137 |
| 12/13/2010 10:58:00 | 29.5 | 8/15/2011 09:34:01 | 23.137 |
| 12/13/2010 11:33:00 | 30.5 | 8/15/2011 10:10:01 | 23.137 |
| 12/13/2010 12:08:00 | 30.5 | 8/15/2011 10:46:01 | 23.137 |
| 12/13/2010 12:43:00 | 31.0 | 8/15/2011 11:22:01 | 23.137 |
| 12/13/2010 13:18:00 | 31.5 | 8/15/2011 11:58:01 | 23.137 |
| 12/13/2010 13:53:00 | 31.5 | 8/15/2011 12:34:01 | 23.137 |
| 12/13/2010 14:28:00 | 32.0 | 8/15/2011 13:10:01 | 23.137 |
| 12/13/2010 15:03:00 | 32.0 | 8/15/2011 13:46:01 | 23.137 |
| 12/13/2010 15:38:00 | 31.5 | 8/15/2011 14:22:01 | 23.137 |
| 12/13/2010 16:13:00 | 31.5 | 8/15/2011 14:58:01 | 23.137 |
| 12/13/2010 16:48:00 | 32.0 | 8/15/2011 15:34:01 | 23.137 |
| 12/13/2010 17:23:00 | 31.5 | 8/15/2011 16:10:01 | 23.137 |
| 12/13/2010 17:58:00 | 31.0 | 8/15/2011 16:46:01 | 23.137 |
| 12/13/2010 18:33:00 | 31.0 | 8/15/2011 17:22:01 | 23.137 |
| 12/13/2010 19:08:00 | 30.5 | 8/15/2011 17:58:01 | 23.137 |
| 12/13/2010 19:43:00 | 30.5 | 8/15/2011 18:34:01 | 23.137 |
| 12/13/2010 20:18:00 | 30.5 | 8/15/2011 19:10:01 | 23.137 |
| 12/13/2010 20:53:00 | 30.0 | 8/15/2011 19:46:01 | 23.137 |
| 12/13/2010 21:28:00 | 29.5 | 8/15/2011 20:22:01 | 23.137 |
| 12/13/2010 22:03:00 | 29.5 | 8/15/2011 20:58:01 | 23.137 |
| 12/13/2010 22:38:00 | 29.0 | 8/15/2011 21:34:01 | 23.137 |
| 12/13/2010 23:13:00 | 28.5 | 8/15/2011 22:10:01 | 23.137 |
| 12/13/2010 23:48:00 | 28.5 | 8/15/2011 22:46:01 | 23.137 |
| 12/14/2010 00:23:00 | 28.5 | 8/15/2011 23:22:01 | 23.137 |
| 12/14/2010 00:58:00 | 28.0 | 8/15/2011 23:58:01 | 23.137 |
| 12/14/2010 01:33:00 | 28.0 | 8/16/2011 00:34:01 | 23.137 |
| 12/14/2010 02:08:00 | 27.5 | 8/16/2011 01:10:01 | 23.137 |
| 12/14/2010 02:43:00 | 27.5 | 8/16/2011 01:46:01 | 23.137 |
| 12/14/2010 03:18:00 | 27.5 | 8/16/2011 02:22:01 | 23.137 |
| 12/14/2010 03:53:00 | 27.0 | 8/16/2011 02:58:01 | 23.137 |
| 12/14/2010 04:28:00 | 27.0 | 8/16/2011 03:34:01 | 23.137 |
| 12/14/2010 05:03:00 | 26.5 | 8/16/2011 04:10:01 | 23.137 |
| 12/14/2010 05:38:00 | 26.5 | 8/16/2011 04:46:01 | 23.137 |
| 12/14/2010 06:13:00 | 26.5 | 8/16/2011 05:22:01 | 23.137 |
| 12/14/2010 06:48:00 | 26.0 | 8/16/2011 05:58:01 | 23.137 |
| 12/14/2010 07:23:00 | 26.5 | 8/16/2011 06:34:01 | 23.137 |
| 12/14/2010 07:58:00 | 27.0 | 8/16/2011 07:10:01 | 23.137 |
| 12/14/2010 08:33:00 | 27.5 | 8/16/2011 07:46:01 | 23.137 |
| 12/14/2010 09:08:00 | 28.0 | 8/16/2011 08:22:01 | 23.137 |
| 12/14/2010 09:43:00 | 28.5 | 8/16/2011 08:58:01 | 23.137 |
| 12/14/2010 10:18:00 | 29.0 | 8/16/2011 09:34:01 | 23.137 |
| 12/14/2010 10:53:00 | 29.0 | 8/16/2011 10:10:01 | 23.137 |
| 12/14/2010 11:28:00 | 29.5 | 8/16/2011 10:46:01 | 23.137 |
| 12/14/2010 12:03:00 | 30.0 | 8/16/2011 11:22:01 | 23.137 |
| 12/14/2010 12:38:00 | 30.5 | 8/16/2011 11:58:01 | 23.137 |
| 12/14/2010 13:13:00 | 31.0 | 8/16/2011 12:34:01 | 23.137 |
| 12/14/2010 13:48:00 | 31.5 | 8/16/2011 13:10:01 | 23.137 |

|                     |      |                    |        |
|---------------------|------|--------------------|--------|
| 12/14/2010 14:23:00 | 31.5 | 8/16/2011 13:46:01 | 23.137 |
| 12/14/2010 14:58:00 | 32.0 | 8/16/2011 14:22:01 | 23.137 |
| 12/14/2010 15:33:00 | 31.0 | 8/16/2011 14:58:01 | 23.137 |
| 12/14/2010 16:08:00 | 31.0 | 8/16/2011 15:34:01 | 23.137 |
| 12/14/2010 16:43:00 | 30.5 | 8/16/2011 16:10:01 | 23.137 |
| 12/14/2010 17:18:00 | 30.5 | 8/16/2011 16:46:01 | 23.137 |
| 12/14/2010 17:53:00 | 30.5 | 8/16/2011 17:22:01 | 23.137 |
| 12/14/2010 18:28:00 | 30.5 | 8/16/2011 17:58:01 | 23.137 |
| 12/14/2010 19:03:00 | 29.0 | 8/16/2011 18:34:01 | 23.137 |
| 12/14/2010 19:38:00 | 28.5 | 8/16/2011 19:10:01 | 23.137 |
| 12/14/2010 20:13:00 | 28.0 | 8/16/2011 19:46:01 | 23.137 |
| 12/14/2010 20:48:00 | 28.0 | 8/16/2011 20:22:01 | 23.137 |
| 12/14/2010 21:23:00 | 28.0 | 8/16/2011 20:58:01 | 23.137 |
| 12/14/2010 21:58:00 | 27.5 | 8/16/2011 21:34:01 | 23.137 |
| 12/14/2010 22:33:00 | 27.0 | 8/16/2011 22:10:01 | 23.137 |
| 12/14/2010 23:08:00 | 27.0 | 8/16/2011 22:46:01 | 23.137 |
| 12/14/2010 23:43:00 | 26.5 | 8/16/2011 23:22:01 | 23.137 |
| 12/15/2010 00:18:00 | 26.5 | 8/16/2011 23:58:01 | 23.137 |
| 12/15/2010 00:53:00 | 26.5 | 8/17/2011 00:34:01 | 23.137 |
| 12/15/2010 01:28:00 | 26.0 | 8/17/2011 01:10:01 | 23.137 |
| 12/15/2010 02:03:00 | 26.0 | 8/17/2011 01:46:01 | 23.137 |
| 12/15/2010 02:38:00 | 26.0 | 8/17/2011 02:22:01 | 23.137 |
| 12/15/2010 03:13:00 | 26.0 | 8/17/2011 02:58:01 | 23.137 |
| 12/15/2010 03:48:00 | 26.0 | 8/17/2011 03:34:01 | 23.137 |
| 12/15/2010 04:23:00 | 25.5 | 8/17/2011 04:10:01 | 23.137 |
| 12/15/2010 04:58:00 | 25.5 | 8/17/2011 04:46:01 | 23.137 |
| 12/15/2010 05:33:00 | 25.5 | 8/17/2011 05:22:01 | 23.137 |
| 12/15/2010 06:08:00 | 25.5 | 8/17/2011 05:58:01 | 23.137 |
| 12/15/2010 06:43:00 | 25.5 | 8/17/2011 06:34:01 | 23.137 |
| 12/15/2010 07:18:00 | 25.5 | 8/17/2011 07:10:01 | 23.137 |
| 12/15/2010 07:53:00 | 26.0 | 8/17/2011 07:46:01 | 23.137 |
| 12/15/2010 08:28:00 | 26.5 | 8/17/2011 08:22:01 | 23.137 |
| 12/15/2010 09:03:00 | 27.0 | 8/17/2011 08:58:01 | 23.137 |
| 12/15/2010 09:38:00 | 27.5 | 8/17/2011 09:34:01 | 23.137 |
| 12/15/2010 10:13:00 | 28.0 | 8/17/2011 10:10:01 | 23.137 |
| 12/15/2010 10:48:00 | 28.5 | 8/17/2011 10:46:01 | 23.137 |
| 12/15/2010 11:23:00 | 28.5 | 8/17/2011 11:22:01 | 23.137 |
| 12/15/2010 11:58:00 | 33.0 | 8/17/2011 11:58:01 | 23.137 |
| 12/15/2010 12:33:00 | 33.0 | 8/17/2011 12:34:01 | 23.137 |
|                     |      | 8/17/2011 13:10:01 | 23.137 |
|                     |      | 8/17/2011 13:46:01 | 23.137 |
|                     |      | 8/17/2011 14:22:01 | 23.137 |
|                     |      | 8/17/2011 14:58:01 | 23.137 |
|                     |      | 8/17/2011 15:34:01 | 23.137 |
|                     |      | 8/17/2011 16:10:01 | 23.137 |
|                     |      | 8/17/2011 16:46:01 | 23.137 |
|                     |      | 8/17/2011 17:22:01 | 23.137 |
|                     |      | 8/17/2011 17:58:01 | 23.137 |
|                     |      | 8/17/2011 18:34:01 | 23.137 |
|                     |      | 8/17/2011 19:10:01 | 23.137 |

|                    |        |
|--------------------|--------|
| 8/17/2011 19:46:01 | 23.137 |
| 8/17/2011 20:22:01 | 23.137 |
| 8/17/2011 20:58:01 | 23.137 |
| 8/17/2011 21:34:01 | 23.137 |
| 8/17/2011 22:10:01 | 23.137 |
| 8/17/2011 22:46:01 | 23.137 |
| 8/17/2011 23:22:01 | 23.137 |
| 8/17/2011 23:58:01 | 23.137 |
| 8/18/2011 00:34:01 | 23.137 |
| 8/18/2011 01:10:01 | 23.137 |
| 8/18/2011 01:46:01 | 23.137 |
| 8/18/2011 02:22:01 | 23.137 |
| 8/18/2011 02:58:01 | 23.137 |
| 8/18/2011 03:34:01 | 23.137 |
| 8/18/2011 04:10:01 | 23.137 |
| 8/18/2011 04:46:01 | 23.137 |
| 8/18/2011 05:22:01 | 23.137 |
| 8/18/2011 05:58:01 | 23.137 |
| 8/18/2011 06:34:01 | 23.137 |
| 8/18/2011 07:10:01 | 23.137 |
| 8/18/2011 07:46:01 | 23.637 |
| 8/18/2011 08:22:01 | 23.637 |
| 8/18/2011 08:58:01 | 23.637 |
| 8/18/2011 09:34:01 | 23.137 |
| 8/18/2011 10:10:01 | 23.137 |
| 8/18/2011 10:46:01 | 23.137 |
| 8/18/2011 11:22:01 | 23.137 |
| 8/18/2011 11:58:01 | 23.137 |
| 8/18/2011 12:34:01 | 23.137 |
| 8/18/2011 13:10:01 | 23.137 |
| 8/18/2011 13:46:01 | 23.137 |
| 8/18/2011 14:22:01 | 23.137 |
| 8/18/2011 14:58:01 | 23.137 |
| 8/18/2011 15:34:01 | 23.137 |
| 8/18/2011 16:10:01 | 23.137 |
| 8/18/2011 16:46:01 | 23.137 |
| 8/18/2011 17:22:01 | 23.137 |
| 8/18/2011 17:58:01 | 23.137 |
| 8/18/2011 18:34:01 | 23.137 |
| 8/18/2011 19:10:01 | 23.137 |
| 8/18/2011 19:46:01 | 23.137 |
| 8/18/2011 20:22:01 | 23.137 |
| 8/18/2011 20:58:01 | 23.137 |
| 8/18/2011 21:34:01 | 23.137 |
| 8/18/2011 22:10:01 | 23.137 |
| 8/18/2011 22:46:01 | 23.137 |
| 8/18/2011 23:22:01 | 23.137 |
| 8/18/2011 23:58:01 | 23.137 |
| 8/19/2011 00:34:01 | 23.137 |
| 8/19/2011 01:10:01 | 23.137 |



|                    |        |
|--------------------|--------|
| 8/19/2011 01:46:01 | 23.137 |
| 8/19/2011 02:22:01 | 23.137 |
| 8/19/2011 02:58:01 | 23.137 |
| 8/19/2011 03:34:01 | 23.137 |
| 8/19/2011 04:10:01 | 23.137 |
| 8/19/2011 04:46:01 | 23.137 |
| 8/19/2011 05:22:01 | 23.137 |
| 8/19/2011 05:58:01 | 23.137 |
| 8/19/2011 06:34:01 | 23.137 |
| 8/19/2011 07:10:01 | 23.137 |
| 8/19/2011 07:46:01 | 23.137 |
| 8/19/2011 08:22:01 | 23.137 |
| 8/19/2011 08:58:01 | 23.137 |
| 8/19/2011 09:34:01 | 23.137 |
| 8/19/2011 10:10:01 | 23.137 |
| 8/19/2011 10:46:01 | 23.137 |
| 8/19/2011 11:22:01 | 23.137 |
| 8/19/2011 11:58:01 | 23.137 |
| 8/19/2011 12:34:01 | 23.137 |
| 8/19/2011 13:10:01 | 23.137 |
| 8/19/2011 13:46:01 | 23.137 |
| 8/19/2011 14:22:01 | 23.137 |
| 8/19/2011 14:58:01 | 23.137 |
| 8/19/2011 15:34:01 | 23.137 |
| 8/19/2011 16:10:01 | 23.137 |
| 8/19/2011 16:46:01 | 23.137 |
| 8/19/2011 17:22:01 | 23.137 |
| 8/19/2011 17:58:01 | 23.137 |
| 8/19/2011 18:34:01 | 23.137 |
| 8/19/2011 19:10:01 | 23.137 |
| 8/19/2011 19:46:01 | 23.137 |
| 8/19/2011 20:22:01 | 23.137 |
| 8/19/2011 20:58:01 | 23.137 |
| 8/19/2011 21:34:01 | 23.137 |
| 8/19/2011 22:10:01 | 23.137 |
| 8/19/2011 22:46:01 | 23.137 |
| 8/19/2011 23:22:01 | 23.137 |
| 8/19/2011 23:58:01 | 23.137 |
| 8/20/2011 00:34:01 | 23.137 |
| 8/20/2011 01:10:01 | 23.137 |
| 8/20/2011 01:46:01 | 23.137 |
| 8/20/2011 02:22:01 | 23.137 |
| 8/20/2011 02:58:01 | 23.137 |
| 8/20/2011 03:34:01 | 23.137 |
| 8/20/2011 04:10:01 | 23.137 |
| 8/20/2011 04:46:01 | 23.137 |
| 8/20/2011 05:22:01 | 23.137 |
| 8/20/2011 05:58:01 | 23.137 |
| 8/20/2011 06:34:01 | 23.137 |
| 8/20/2011 07:10:01 | 23.137 |

|                    |        |
|--------------------|--------|
| 8/20/2011 07:46:01 | 23.137 |
| 8/20/2011 08:22:01 | 23.137 |
| 8/20/2011 08:58:01 | 23.137 |
| 8/20/2011 09:34:01 | 23.137 |
| 8/20/2011 10:10:01 | 23.137 |
| 8/20/2011 10:46:01 | 23.137 |
| 8/20/2011 11:22:01 | 23.137 |
| 8/20/2011 11:58:01 | 23.137 |
| 8/20/2011 12:34:01 | 23.137 |
| 8/20/2011 13:10:01 | 23.137 |
| 8/20/2011 13:46:01 | 23.137 |
| 8/20/2011 14:22:01 | 23.137 |
| 8/20/2011 14:58:01 | 23.137 |
| 8/20/2011 15:34:01 | 23.137 |
| 8/20/2011 16:10:01 | 23.137 |
| 8/20/2011 16:46:01 | 23.137 |
| 8/20/2011 17:22:01 | 23.137 |
| 8/20/2011 17:58:01 | 23.137 |
| 8/20/2011 18:34:01 | 23.137 |
| 8/20/2011 19:10:01 | 23.137 |
| 8/20/2011 19:46:01 | 23.137 |
| 8/20/2011 20:22:01 | 23.137 |
| 8/20/2011 20:58:01 | 23.137 |
| 8/20/2011 21:34:01 | 23.137 |
| 8/20/2011 22:10:01 | 23.137 |
| 8/20/2011 22:46:01 | 23.137 |
| 8/20/2011 23:22:01 | 23.137 |
| 8/20/2011 23:58:01 | 23.137 |
| 8/21/2011 00:34:01 | 23.137 |
| 8/21/2011 01:10:01 | 23.137 |
| 8/21/2011 01:46:01 | 23.137 |
| 8/21/2011 02:22:01 | 23.137 |
| 8/21/2011 02:58:01 | 23.137 |
| 8/21/2011 03:34:01 | 23.137 |
| 8/21/2011 04:10:01 | 23.137 |
| 8/21/2011 04:46:01 | 23.137 |
| 8/21/2011 05:22:01 | 23.137 |
| 8/21/2011 05:58:01 | 23.137 |
| 8/21/2011 06:34:01 | 23.137 |
| 8/21/2011 07:10:01 | 23.137 |
| 8/21/2011 07:46:01 | 23.137 |
| 8/21/2011 08:22:01 | 23.137 |
| 8/21/2011 08:58:01 | 23.137 |
| 8/21/2011 09:34:01 | 23.137 |
| 8/21/2011 10:10:01 | 23.137 |
| 8/21/2011 10:46:01 | 23.137 |
| 8/21/2011 11:22:01 | 23.137 |
| 8/21/2011 11:58:01 | 23.137 |
| 8/21/2011 12:34:01 | 23.137 |
| 8/21/2011 13:10:01 | 23.137 |

|                    |        |
|--------------------|--------|
| 8/21/2011 13:46:01 | 23.137 |
| 8/21/2011 14:22:01 | 23.137 |
| 8/21/2011 14:58:01 | 23.137 |
| 8/21/2011 15:34:01 | 23.137 |
| 8/21/2011 16:10:01 | 23.137 |
| 8/21/2011 16:46:01 | 23.137 |
| 8/21/2011 17:22:01 | 23.137 |
| 8/21/2011 17:58:01 | 23.137 |
| 8/21/2011 18:34:01 | 23.137 |
| 8/21/2011 19:10:01 | 23.137 |
| 8/21/2011 19:46:01 | 23.137 |
| 8/21/2011 20:22:01 | 23.137 |
| 8/21/2011 20:58:01 | 23.137 |
| 8/21/2011 21:34:01 | 23.137 |
| 8/21/2011 22:10:01 | 23.137 |
| 8/21/2011 22:46:01 | 23.137 |
| 8/21/2011 23:22:01 | 23.137 |
| 8/21/2011 23:58:01 | 23.137 |
| 8/22/2011 00:34:01 | 23.137 |
| 8/22/2011 01:10:01 | 23.137 |
| 8/22/2011 01:46:01 | 23.137 |
| 8/22/2011 02:22:01 | 23.137 |
| 8/22/2011 02:58:01 | 23.137 |
| 8/22/2011 03:34:01 | 23.137 |
| 8/22/2011 04:10:01 | 23.137 |
| 8/22/2011 04:46:01 | 23.137 |
| 8/22/2011 05:22:01 | 23.137 |
| 8/22/2011 05:58:01 | 23.137 |
| 8/22/2011 06:34:01 | 23.137 |
| 8/22/2011 07:10:01 | 23.137 |
| 8/22/2011 07:46:01 | 23.137 |
| 8/22/2011 08:22:01 | 23.137 |
| 8/22/2011 08:58:01 | 23.137 |
| 8/22/2011 09:34:01 | 23.137 |
| 8/22/2011 10:10:01 | 23.137 |
| 8/22/2011 10:46:01 | 23.137 |
| 8/22/2011 11:22:01 | 23.137 |
| 8/22/2011 11:58:01 | 23.137 |
| 8/22/2011 12:34:01 | 23.137 |
| 8/22/2011 13:10:01 | 23.137 |
| 8/22/2011 13:46:01 | 23.137 |
| 8/22/2011 14:22:01 | 23.137 |
| 8/22/2011 14:58:01 | 23.137 |
| 8/22/2011 15:34:01 | 23.137 |
| 8/22/2011 16:10:01 | 23.137 |
| 8/22/2011 16:46:01 | 23.137 |
| 8/22/2011 17:22:01 | 23.137 |
| 8/22/2011 17:58:01 | 23.137 |
| 8/22/2011 18:34:01 | 23.137 |
| 8/22/2011 19:10:01 | 23.137 |

|                    |        |
|--------------------|--------|
| 8/22/2011 19:46:01 | 23.137 |
| 8/22/2011 20:22:01 | 23.137 |
| 8/22/2011 20:58:01 | 23.137 |
| 8/22/2011 21:34:01 | 23.137 |
| 8/22/2011 22:10:01 | 23.137 |
| 8/22/2011 22:46:01 | 23.637 |
| 8/22/2011 23:22:01 | 23.137 |
| 8/22/2011 23:58:01 | 23.137 |
| 8/23/2011 00:34:01 | 23.137 |
| 8/23/2011 01:10:01 | 23.137 |
| 8/23/2011 01:46:01 | 23.137 |
| 8/23/2011 02:22:01 | 23.137 |
| 8/23/2011 02:58:01 | 23.137 |
| 8/23/2011 03:34:01 | 23.637 |
| 8/23/2011 04:10:01 | 23.637 |
| 8/23/2011 04:46:01 | 23.637 |
| 8/23/2011 05:22:01 | 23.637 |
| 8/23/2011 05:58:01 | 23.637 |
| 8/23/2011 06:34:01 | 23.637 |
| 8/23/2011 07:10:01 | 23.637 |
| 8/23/2011 07:46:01 | 23.637 |
| 8/23/2011 08:22:01 | 23.637 |
| 8/23/2011 08:58:01 | 23.637 |
| 8/23/2011 09:34:01 | 23.637 |
| 8/23/2011 10:10:01 | 23.637 |
| 8/23/2011 10:46:01 | 23.637 |
| 8/23/2011 11:22:01 | 23.637 |
| 8/23/2011 11:58:01 | 23.637 |
| 8/23/2011 12:34:01 | 23.637 |
| 8/23/2011 13:10:01 | 23.637 |
| 8/23/2011 13:46:01 | 23.637 |
| 8/23/2011 14:22:01 | 23.637 |
| 8/23/2011 14:58:01 | 23.637 |
| 8/23/2011 15:34:01 | 23.637 |
| 8/23/2011 16:10:01 | 23.637 |
| 8/23/2011 16:46:01 | 23.637 |
| 8/23/2011 17:22:01 | 23.637 |
| 8/23/2011 17:58:01 | 23.637 |
| 8/23/2011 18:34:01 | 23.637 |
| 8/23/2011 19:10:01 | 23.637 |
| 8/23/2011 19:46:01 | 23.637 |
| 8/23/2011 20:22:01 | 23.637 |
| 8/23/2011 20:58:01 | 23.637 |
| 8/23/2011 21:34:01 | 23.637 |
| 8/23/2011 22:10:01 | 23.637 |
| 8/23/2011 22:46:01 | 23.637 |
| 8/23/2011 23:22:01 | 23.637 |
| 8/23/2011 23:58:01 | 23.637 |
| 8/24/2011 00:34:01 | 23.637 |
| 8/24/2011 01:10:01 | 23.637 |

|                    |        |
|--------------------|--------|
| 8/24/2011 01:46:01 | 23.637 |
| 8/24/2011 02:22:01 | 23.637 |
| 8/24/2011 02:58:01 | 23.637 |
| 8/24/2011 03:34:01 | 23.637 |
| 8/24/2011 04:10:01 | 23.637 |
| 8/24/2011 04:46:01 | 23.637 |
| 8/24/2011 05:22:01 | 23.637 |
| 8/24/2011 05:58:01 | 23.637 |
| 8/24/2011 06:34:01 | 23.637 |
| 8/24/2011 07:10:01 | 23.637 |
| 8/24/2011 07:46:01 | 23.637 |
| 8/24/2011 08:22:01 | 23.637 |
| 8/24/2011 08:58:01 | 23.637 |
| 8/24/2011 09:34:01 | 23.637 |
| 8/24/2011 10:10:01 | 23.637 |
| 8/24/2011 10:46:01 | 23.637 |
| 8/24/2011 11:22:01 | 23.637 |
| 8/24/2011 11:58:01 | 23.637 |
| 8/24/2011 12:34:01 | 23.637 |
| 8/24/2011 13:10:01 | 23.637 |
| 8/24/2011 13:46:01 | 23.637 |
| 8/24/2011 14:22:01 | 23.637 |
| 8/24/2011 14:58:01 | 23.637 |
| 8/24/2011 15:34:01 | 23.637 |
| 8/24/2011 16:10:01 | 23.637 |
| 8/24/2011 16:46:01 | 23.637 |
| 8/24/2011 17:22:01 | 23.637 |
| 8/24/2011 17:58:01 | 23.637 |
| 8/24/2011 18:34:01 | 23.637 |
| 8/24/2011 19:10:01 | 23.637 |
| 8/24/2011 19:46:01 | 23.637 |
| 8/24/2011 20:22:01 | 23.637 |
| 8/24/2011 20:58:01 | 23.637 |
| 8/24/2011 21:34:01 | 23.637 |
| 8/24/2011 22:10:01 | 23.637 |
| 8/24/2011 22:46:01 | 23.637 |
| 8/24/2011 23:22:01 | 23.637 |
| 8/24/2011 23:58:01 | 23.637 |
| 8/25/2011 00:34:01 | 23.637 |
| 8/25/2011 01:10:01 | 23.637 |
| 8/25/2011 01:46:01 | 23.637 |
| 8/25/2011 02:22:01 | 23.637 |
| 8/25/2011 02:58:01 | 23.637 |
| 8/25/2011 03:34:01 | 23.637 |
| 8/25/2011 04:10:01 | 23.637 |
| 8/25/2011 04:46:01 | 23.637 |
| 8/25/2011 05:22:01 | 23.637 |
| 8/25/2011 05:58:01 | 23.637 |
| 8/25/2011 06:34:01 | 23.637 |
| 8/25/2011 07:10:01 | 23.637 |

|                    |        |
|--------------------|--------|
| 8/25/2011 07:46:01 | 23.637 |
| 8/25/2011 08:22:01 | 23.637 |
| 8/25/2011 08:58:01 | 23.637 |
| 8/25/2011 09:34:01 | 23.637 |
| 8/25/2011 10:10:01 | 23.637 |
| 8/25/2011 10:46:01 | 23.637 |
| 8/25/2011 11:22:01 | 23.637 |
| 8/25/2011 11:58:01 | 23.137 |
| 8/25/2011 12:34:01 | 23.137 |
| 8/25/2011 13:10:01 | 23.137 |
| 8/25/2011 13:46:01 | 23.137 |
| 8/25/2011 14:22:01 | 23.137 |
| 8/25/2011 14:58:01 | 23.137 |
| 8/25/2011 15:34:01 | 23.137 |
| 8/25/2011 16:10:01 | 23.137 |
| 8/25/2011 16:46:01 | 23.137 |
| 8/25/2011 17:22:01 | 23.137 |
| 8/25/2011 17:58:01 | 23.137 |
| 8/25/2011 18:34:01 | 23.137 |
| 8/25/2011 19:10:01 | 23.137 |
| 8/25/2011 19:46:01 | 23.137 |
| 8/25/2011 20:22:01 | 23.137 |
| 8/25/2011 20:58:01 | 23.137 |
| 8/25/2011 21:34:01 | 23.137 |
| 8/25/2011 22:10:01 | 23.137 |
| 8/25/2011 22:46:01 | 23.137 |
| 8/25/2011 23:22:01 | 23.137 |
| 8/25/2011 23:58:01 | 23.637 |
| 8/26/2011 00:34:01 | 23.637 |
| 8/26/2011 01:10:01 | 23.637 |
| 8/26/2011 01:46:01 | 23.637 |
| 8/26/2011 02:22:01 | 23.637 |
| 8/26/2011 02:58:01 | 23.637 |
| 8/26/2011 03:34:01 | 23.637 |
| 8/26/2011 04:10:01 | 23.637 |
| 8/26/2011 04:46:01 | 23.637 |
| 8/26/2011 05:22:01 | 23.137 |
| 8/26/2011 05:58:01 | 23.137 |
| 8/26/2011 06:34:01 | 23.137 |
| 8/26/2011 07:10:01 | 23.137 |
| 8/26/2011 07:46:01 | 23.137 |
| 8/26/2011 08:22:01 | 23.137 |
| 8/26/2011 08:58:01 | 23.137 |
| 8/26/2011 09:34:01 | 23.137 |
| 8/26/2011 10:10:01 | 23.137 |
| 8/26/2011 10:46:01 | 23.137 |
| 8/26/2011 11:22:01 | 23.137 |
| 8/26/2011 11:58:01 | 23.137 |
| 8/26/2011 12:34:01 | 23.137 |
| 8/26/2011 13:10:01 | 23.137 |

|                    |        |
|--------------------|--------|
| 8/26/2011 13:46:01 | 23.137 |
| 8/26/2011 14:22:01 | 23.137 |
| 8/26/2011 14:58:01 | 23.137 |
| 8/26/2011 15:34:01 | 23.137 |
| 8/26/2011 16:10:01 | 23.137 |
| 8/26/2011 16:46:01 | 23.137 |
| 8/26/2011 17:22:01 | 23.137 |
| 8/26/2011 17:58:01 | 23.137 |
| 8/26/2011 18:34:01 | 23.137 |
| 8/26/2011 19:10:01 | 23.137 |
| 8/26/2011 19:46:01 | 23.137 |
| 8/26/2011 20:22:01 | 23.137 |
| 8/26/2011 20:58:01 | 23.137 |
| 8/26/2011 21:34:01 | 23.137 |
| 8/26/2011 22:10:01 | 23.137 |
| 8/26/2011 22:46:01 | 23.137 |
| 8/26/2011 23:22:01 | 23.137 |
| 8/26/2011 23:58:01 | 23.137 |
| 8/27/2011 00:34:01 | 23.137 |
| 8/27/2011 01:10:01 | 23.137 |
| 8/27/2011 01:46:01 | 23.137 |
| 8/27/2011 02:22:01 | 23.137 |
| 8/27/2011 02:58:01 | 23.137 |
| 8/27/2011 03:34:01 | 23.137 |
| 8/27/2011 04:10:01 | 23.137 |
| 8/27/2011 04:46:01 | 23.137 |
| 8/27/2011 05:22:01 | 23.137 |
| 8/27/2011 05:58:01 | 23.137 |
| 8/27/2011 06:34:01 | 23.137 |
| 8/27/2011 07:10:01 | 23.137 |
| 8/27/2011 07:46:01 | 23.137 |
| 8/27/2011 08:22:01 | 23.137 |
| 8/27/2011 08:58:01 | 23.137 |
| 8/27/2011 09:34:01 | 23.137 |
| 8/27/2011 10:10:01 | 23.137 |
| 8/27/2011 10:46:01 | 23.137 |
| 8/27/2011 11:22:01 | 23.137 |
| 8/27/2011 11:58:01 | 23.137 |
| 8/27/2011 12:34:01 | 23.137 |
| 8/27/2011 13:10:01 | 23.137 |
| 8/27/2011 13:46:01 | 23.137 |
| 8/27/2011 14:22:01 | 23.137 |
| 8/27/2011 14:58:01 | 23.137 |
| 8/27/2011 15:34:01 | 23.137 |
| 8/27/2011 16:10:01 | 23.137 |
| 8/27/2011 16:46:01 | 23.137 |
| 8/27/2011 17:22:01 | 23.137 |
| 8/27/2011 17:58:01 | 23.137 |
| 8/27/2011 18:34:01 | 23.137 |
| 8/27/2011 19:10:01 | 23.137 |

|                    |        |
|--------------------|--------|
| 8/27/2011 19:46:01 | 23.137 |
| 8/27/2011 20:22:01 | 23.137 |
| 8/27/2011 20:58:01 | 23.137 |
| 8/27/2011 21:34:01 | 23.137 |
| 8/27/2011 22:10:01 | 23.137 |
| 8/27/2011 22:46:01 | 23.137 |
| 8/27/2011 23:22:01 | 23.137 |
| 8/27/2011 23:58:01 | 23.137 |
| 8/28/2011 00:34:01 | 23.137 |
| 8/28/2011 01:10:01 | 23.137 |
| 8/28/2011 01:46:01 | 23.137 |
| 8/28/2011 02:22:01 | 23.137 |
| 8/28/2011 02:58:01 | 23.137 |
| 8/28/2011 03:34:01 | 23.137 |
| 8/28/2011 04:10:01 | 23.137 |
| 8/28/2011 04:46:01 | 23.137 |
| 8/28/2011 05:22:01 | 23.137 |
| 8/28/2011 05:58:01 | 23.137 |
| 8/28/2011 06:34:01 | 23.137 |
| 8/28/2011 07:10:01 | 23.137 |
| 8/28/2011 07:46:01 | 23.137 |
| 8/28/2011 08:22:01 | 23.137 |
| 8/28/2011 08:58:01 | 23.137 |
| 8/28/2011 09:34:01 | 23.137 |
| 8/28/2011 10:10:01 | 23.137 |
| 8/28/2011 10:46:01 | 23.137 |
| 8/28/2011 11:22:01 | 23.137 |
| 8/28/2011 11:58:01 | 23.137 |
| 8/28/2011 12:34:01 | 23.137 |
| 8/28/2011 13:10:01 | 23.137 |
| 8/28/2011 13:46:01 | 23.137 |
| 8/28/2011 14:22:01 | 23.137 |
| 8/28/2011 14:58:01 | 23.137 |
| 8/28/2011 15:34:01 | 23.137 |
| 8/28/2011 16:10:01 | 23.137 |
| 8/28/2011 16:46:01 | 23.137 |
| 8/28/2011 17:22:01 | 23.137 |
| 8/28/2011 17:58:01 | 23.137 |
| 8/28/2011 18:34:01 | 23.137 |
| 8/28/2011 19:10:01 | 23.137 |
| 8/28/2011 19:46:01 | 23.137 |
| 8/28/2011 20:22:01 | 23.137 |
| 8/28/2011 20:58:01 | 23.137 |
| 8/28/2011 21:34:01 | 23.137 |
| 8/28/2011 22:10:01 | 23.137 |
| 8/28/2011 22:46:01 | 23.137 |
| 8/28/2011 23:22:01 | 23.137 |
| 8/28/2011 23:58:01 | 23.137 |
| 8/29/2011 00:34:01 | 23.137 |
| 8/29/2011 01:10:01 | 23.137 |



|                    |        |
|--------------------|--------|
| 8/29/2011 01:46:01 | 23.137 |
| 8/29/2011 02:22:01 | 23.137 |
| 8/29/2011 02:58:01 | 23.137 |
| 8/29/2011 03:34:01 | 23.137 |
| 8/29/2011 04:10:01 | 23.137 |
| 8/29/2011 04:46:01 | 23.137 |
| 8/29/2011 05:22:01 | 23.137 |
| 8/29/2011 05:58:01 | 23.137 |
| 8/29/2011 06:34:01 | 23.137 |
| 8/29/2011 07:10:01 | 23.137 |
| 8/29/2011 07:46:01 | 23.137 |
| 8/29/2011 08:22:01 | 23.137 |
| 8/29/2011 08:58:01 | 23.137 |
| 8/29/2011 09:34:01 | 23.137 |
| 8/29/2011 10:10:01 | 23.137 |
| 8/29/2011 10:46:01 | 23.137 |
| 8/29/2011 11:22:01 | 23.137 |
| 8/29/2011 11:58:01 | 23.137 |
| 8/29/2011 12:34:01 | 23.137 |
| 8/29/2011 13:10:01 | 23.137 |
| 8/29/2011 13:46:01 | 23.137 |
| 8/29/2011 14:22:01 | 23.137 |
| 8/29/2011 14:58:01 | 23.137 |
| 8/29/2011 15:34:01 | 23.137 |
| 8/29/2011 16:10:01 | 23.137 |
| 8/29/2011 16:46:01 | 23.137 |
| 8/29/2011 17:22:01 | 23.137 |
| 8/29/2011 17:58:01 | 23.137 |
| 8/29/2011 18:34:01 | 23.137 |
| 8/29/2011 19:10:01 | 23.137 |
| 8/29/2011 19:46:01 | 23.137 |
| 8/29/2011 20:22:01 | 23.137 |
| 8/29/2011 20:58:01 | 23.137 |
| 8/29/2011 21:34:01 | 23.137 |
| 8/29/2011 22:10:01 | 23.137 |
| 8/29/2011 22:46:01 | 23.137 |
| 8/29/2011 23:22:01 | 23.637 |
| 8/29/2011 23:58:01 | 23.637 |
| 8/30/2011 00:34:01 | 23.637 |
| 8/30/2011 01:10:01 | 23.637 |
| 8/30/2011 01:46:01 | 23.637 |
| 8/30/2011 02:22:01 | 23.637 |
| 8/30/2011 02:58:01 | 23.637 |
| 8/30/2011 03:34:01 | 23.637 |
| 8/30/2011 04:10:01 | 23.637 |
| 8/30/2011 04:46:01 | 23.637 |
| 8/30/2011 05:22:01 | 23.637 |
| 8/30/2011 05:58:01 | 23.637 |
| 8/30/2011 06:34:01 | 23.637 |
| 8/30/2011 07:10:01 | 23.137 |

|                    |        |
|--------------------|--------|
| 8/30/2011 07:46:01 | 23.137 |
| 8/30/2011 08:22:01 | 23.137 |
| 8/30/2011 08:58:01 | 23.137 |
| 8/30/2011 09:34:01 | 23.137 |
| 8/30/2011 10:10:01 | 23.637 |
| 8/30/2011 10:46:01 | 23.637 |
| 8/30/2011 11:22:01 | 23.637 |
| 8/30/2011 11:58:01 | 23.637 |
| 8/30/2011 12:34:01 | 23.637 |
| 8/30/2011 13:10:01 | 23.137 |
| 8/30/2011 13:46:01 | 23.137 |
| 8/30/2011 14:22:01 | 23.137 |
| 8/30/2011 14:58:01 | 23.137 |
| 8/30/2011 15:34:01 | 23.137 |
| 8/30/2011 16:10:01 | 23.137 |
| 8/30/2011 16:46:01 | 23.137 |
| 8/30/2011 17:22:01 | 23.137 |
| 8/30/2011 17:58:01 | 23.137 |
| 8/30/2011 18:34:01 | 23.137 |
| 8/30/2011 19:10:01 | 23.137 |
| 8/30/2011 19:46:01 | 23.137 |
| 8/30/2011 20:22:01 | 23.137 |
| 8/30/2011 20:58:01 | 23.137 |
| 8/30/2011 21:34:01 | 23.137 |
| 8/30/2011 22:10:01 | 23.137 |
| 8/30/2011 22:46:01 | 23.137 |
| 8/30/2011 23:22:01 | 23.137 |
| 8/30/2011 23:58:01 | 23.137 |
| 8/31/2011 00:34:01 | 23.637 |
| 8/31/2011 01:10:01 | 23.637 |
| 8/31/2011 01:46:01 | 23.637 |
| 8/31/2011 02:22:01 | 23.637 |
| 8/31/2011 02:58:01 | 23.637 |
| 8/31/2011 03:34:01 | 23.637 |
| 8/31/2011 04:10:01 | 23.637 |
| 8/31/2011 04:46:01 | 23.637 |
| 8/31/2011 05:22:01 | 23.637 |
| 8/31/2011 05:58:01 | 23.637 |
| 8/31/2011 06:34:01 | 23.637 |
| 8/31/2011 07:10:01 | 23.637 |
| 8/31/2011 07:46:01 | 23.637 |
| 8/31/2011 08:22:01 | 23.137 |
| 8/31/2011 08:58:01 | 23.137 |
| 8/31/2011 09:34:01 | 23.137 |
| 8/31/2011 10:10:01 | 23.137 |
| 8/31/2011 10:46:01 | 23.137 |
| 8/31/2011 11:22:01 | 23.137 |
| 8/31/2011 11:58:01 | 23.137 |
| 8/31/2011 12:34:01 | 23.137 |
| 8/31/2011 13:10:01 | 23.137 |

|                    |        |
|--------------------|--------|
| 8/31/2011 13:46:01 | 23.137 |
| 8/31/2011 14:22:01 | 23.137 |
| 8/31/2011 14:58:01 | 23.137 |
| 8/31/2011 15:34:01 | 23.137 |
| 8/31/2011 16:10:01 | 23.137 |
| 8/31/2011 16:46:01 | 23.137 |
| 8/31/2011 17:22:01 | 23.137 |
| 8/31/2011 17:58:01 | 23.137 |
| 8/31/2011 18:34:01 | 23.137 |
| 8/31/2011 19:10:01 | 23.637 |
| 8/31/2011 19:46:01 | 23.137 |
| 8/31/2011 20:22:01 | 23.137 |
| 8/31/2011 20:58:01 | 23.137 |
| 8/31/2011 21:34:01 | 23.637 |
| 8/31/2011 22:10:01 | 23.637 |
| 8/31/2011 22:46:01 | 23.637 |
| 8/31/2011 23:22:01 | 23.637 |
| 8/31/2011 23:58:01 | 23.637 |
| 9/1/2011 00:34:01  | 23.637 |
| 9/1/2011 01:10:01  | 23.637 |
| 9/1/2011 01:46:01  | 23.637 |
| 9/1/2011 02:22:01  | 23.637 |
| 9/1/2011 02:58:01  | 23.637 |
| 9/1/2011 03:34:01  | 23.637 |
| 9/1/2011 04:10:01  | 23.637 |
| 9/1/2011 04:46:01  | 23.637 |
| 9/1/2011 05:22:01  | 23.637 |
| 9/1/2011 05:58:01  | 23.637 |
| 9/1/2011 06:34:01  | 23.637 |
| 9/1/2011 07:10:01  | 23.637 |
| 9/1/2011 07:46:01  | 23.637 |
| 9/1/2011 08:22:01  | 23.637 |
| 9/1/2011 08:58:01  | 23.637 |
| 9/1/2011 09:34:01  | 23.637 |
| 9/1/2011 10:10:01  | 23.637 |
| 9/1/2011 10:46:01  | 23.137 |
| 9/1/2011 11:22:01  | 23.137 |
| 9/1/2011 11:58:01  | 23.637 |
| 9/1/2011 12:34:01  | 23.637 |
| 9/1/2011 13:10:01  | 23.637 |
| 9/1/2011 13:46:01  | 23.137 |
| 9/1/2011 14:22:01  | 23.137 |
| 9/1/2011 14:58:01  | 23.137 |
| 9/1/2011 15:34:01  | 23.137 |
| 9/1/2011 16:10:01  | 23.137 |
| 9/1/2011 16:46:01  | 23.137 |
| 9/1/2011 17:22:01  | 23.137 |
| 9/1/2011 17:58:01  | 23.137 |
| 9/1/2011 18:34:01  | 23.137 |
| 9/1/2011 19:10:01  | 23.137 |

|                   |        |
|-------------------|--------|
| 9/1/2011 19:46:01 | 23.137 |
| 9/1/2011 20:22:01 | 23.637 |
| 9/1/2011 20:58:01 | 23.637 |
| 9/1/2011 21:34:01 | 23.137 |
| 9/1/2011 22:10:01 | 23.637 |
| 9/1/2011 22:46:01 | 23.637 |
| 9/1/2011 23:22:01 | 23.637 |
| 9/1/2011 23:58:01 | 23.637 |
| 9/2/2011 00:34:01 | 23.637 |
| 9/2/2011 01:10:01 | 23.637 |
| 9/2/2011 01:46:01 | 23.637 |
| 9/2/2011 02:22:01 | 23.637 |
| 9/2/2011 02:58:01 | 23.637 |
| 9/2/2011 03:34:01 | 23.637 |
| 9/2/2011 04:10:01 | 23.637 |
| 9/2/2011 04:46:01 | 23.637 |
| 9/2/2011 05:22:01 | 23.637 |
| 9/2/2011 05:58:01 | 23.637 |
| 9/2/2011 06:34:01 | 23.637 |
| 9/2/2011 07:10:01 | 23.637 |
| 9/2/2011 07:46:01 | 23.637 |
| 9/2/2011 08:22:01 | 23.637 |
| 9/2/2011 08:58:01 | 23.637 |
| 9/2/2011 09:34:01 | 23.637 |
| 9/2/2011 10:10:01 | 23.637 |
| 9/2/2011 10:46:01 | 23.637 |
| 9/2/2011 11:22:01 | 23.637 |
| 9/2/2011 11:58:01 | 23.637 |
| 9/2/2011 12:34:01 | 23.637 |
| 9/2/2011 13:10:01 | 23.637 |
| 9/2/2011 13:46:01 | 23.637 |
| 9/2/2011 14:22:01 | 23.637 |
| 9/2/2011 14:58:01 | 23.637 |
| 9/2/2011 15:34:01 | 23.637 |
| 9/2/2011 16:10:01 | 23.637 |
| 9/2/2011 16:46:01 | 23.637 |
| 9/2/2011 17:22:01 | 23.637 |
| 9/2/2011 17:58:01 | 23.637 |
| 9/2/2011 18:34:01 | 23.637 |
| 9/2/2011 19:10:01 | 23.637 |
| 9/2/2011 19:46:01 | 23.637 |
| 9/2/2011 20:22:01 | 23.637 |
| 9/2/2011 20:58:01 | 23.637 |
| 9/2/2011 21:34:01 | 23.637 |
| 9/2/2011 22:10:01 | 23.637 |
| 9/2/2011 22:46:01 | 23.637 |
| 9/2/2011 23:22:01 | 23.637 |
| 9/2/2011 23:58:01 | 23.637 |
| 9/3/2011 00:34:01 | 23.637 |
| 9/3/2011 01:10:01 | 23.637 |

|                   |        |
|-------------------|--------|
| 9/3/2011 01:46:01 | 23.637 |
| 9/3/2011 02:22:01 | 23.637 |
| 9/3/2011 02:58:01 | 23.637 |
| 9/3/2011 03:34:01 | 23.637 |
| 9/3/2011 04:10:01 | 23.637 |
| 9/3/2011 04:46:01 | 23.637 |
| 9/3/2011 05:22:01 | 23.637 |
| 9/3/2011 05:58:01 | 23.637 |
| 9/3/2011 06:34:01 | 23.637 |
| 9/3/2011 07:10:01 | 23.637 |
| 9/3/2011 07:46:01 | 23.637 |
| 9/3/2011 08:22:01 | 23.637 |
| 9/3/2011 08:58:01 | 23.637 |
| 9/3/2011 09:34:01 | 23.637 |
| 9/3/2011 10:10:01 | 23.637 |
| 9/3/2011 10:46:01 | 23.637 |
| 9/3/2011 11:22:01 | 23.637 |
| 9/3/2011 11:58:01 | 23.637 |
| 9/3/2011 12:34:01 | 23.637 |
| 9/3/2011 13:10:01 | 23.637 |
| 9/3/2011 13:46:01 | 23.637 |
| 9/3/2011 14:22:01 | 23.637 |
| 9/3/2011 14:58:01 | 23.637 |
| 9/3/2011 15:34:01 | 23.637 |
| 9/3/2011 16:10:01 | 23.637 |
| 9/3/2011 16:46:01 | 23.637 |
| 9/3/2011 17:22:01 | 23.637 |
| 9/3/2011 17:58:01 | 23.637 |
| 9/3/2011 18:34:01 | 23.637 |
| 9/3/2011 19:10:01 | 23.637 |
| 9/3/2011 19:46:01 | 23.637 |
| 9/3/2011 20:22:01 | 23.637 |
| 9/3/2011 20:58:01 | 23.637 |
| 9/3/2011 21:34:01 | 23.637 |
| 9/3/2011 22:10:01 | 23.637 |
| 9/3/2011 22:46:01 | 23.637 |
| 9/3/2011 23:22:01 | 23.637 |
| 9/3/2011 23:58:01 | 23.637 |
| 9/4/2011 00:34:01 | 23.637 |
| 9/4/2011 01:10:01 | 23.637 |
| 9/4/2011 01:46:01 | 23.637 |
| 9/4/2011 02:22:01 | 23.637 |
| 9/4/2011 02:58:01 | 23.637 |
| 9/4/2011 03:34:01 | 23.637 |
| 9/4/2011 04:10:01 | 23.637 |
| 9/4/2011 04:46:01 | 23.637 |
| 9/4/2011 05:22:01 | 23.637 |
| 9/4/2011 05:58:01 | 23.637 |
| 9/4/2011 06:34:01 | 23.637 |
| 9/4/2011 07:10:01 | 23.637 |

|                   |        |
|-------------------|--------|
| 9/4/2011 07:46:01 | 23.637 |
| 9/4/2011 08:22:01 | 23.637 |
| 9/4/2011 08:58:01 | 23.637 |
| 9/4/2011 09:34:01 | 23.637 |
| 9/4/2011 10:10:01 | 23.637 |
| 9/4/2011 10:46:01 | 23.637 |
| 9/4/2011 11:22:01 | 23.637 |
| 9/4/2011 11:58:01 | 23.637 |
| 9/4/2011 12:34:01 | 23.637 |
| 9/4/2011 13:10:01 | 23.637 |
| 9/4/2011 13:46:01 | 23.637 |
| 9/4/2011 14:22:01 | 23.637 |
| 9/4/2011 14:58:01 | 23.637 |
| 9/4/2011 15:34:01 | 23.637 |
| 9/4/2011 16:10:01 | 23.637 |
| 9/4/2011 16:46:01 | 23.637 |
| 9/4/2011 17:22:01 | 23.637 |
| 9/4/2011 17:58:01 | 23.637 |
| 9/4/2011 18:34:01 | 23.637 |
| 9/4/2011 19:10:01 | 23.637 |
| 9/4/2011 19:46:01 | 23.637 |
| 9/4/2011 20:22:01 | 23.637 |
| 9/4/2011 20:58:01 | 23.637 |
| 9/4/2011 21:34:01 | 23.637 |
| 9/4/2011 22:10:01 | 23.637 |
| 9/4/2011 22:46:01 | 23.637 |
| 9/4/2011 23:22:01 | 23.637 |
| 9/4/2011 23:58:01 | 23.637 |
| 9/5/2011 00:34:01 | 23.637 |
| 9/5/2011 01:10:01 | 23.637 |
| 9/5/2011 01:46:01 | 23.637 |
| 9/5/2011 02:22:01 | 23.637 |
| 9/5/2011 02:58:01 | 23.637 |
| 9/5/2011 03:34:01 | 23.637 |
| 9/5/2011 04:10:01 | 23.637 |
| 9/5/2011 04:46:01 | 23.637 |
| 9/5/2011 05:22:01 | 23.637 |
| 9/5/2011 05:58:01 | 23.637 |
| 9/5/2011 06:34:01 | 23.637 |
| 9/5/2011 07:10:01 | 23.637 |
| 9/5/2011 07:46:01 | 23.637 |
| 9/5/2011 08:22:01 | 23.637 |
| 9/5/2011 08:58:01 | 23.637 |
| 9/5/2011 09:34:01 | 23.637 |
| 9/5/2011 10:10:01 | 23.637 |
| 9/5/2011 10:46:01 | 23.637 |
| 9/5/2011 11:22:01 | 23.637 |
| 9/5/2011 11:58:01 | 23.637 |
| 9/5/2011 12:34:01 | 23.637 |
| 9/5/2011 13:10:01 | 23.637 |

|                   |        |
|-------------------|--------|
| 9/5/2011 13:46:01 | 23.637 |
| 9/5/2011 14:22:01 | 23.637 |
| 9/5/2011 14:58:01 | 23.637 |
| 9/5/2011 15:34:01 | 23.637 |
| 9/5/2011 16:10:01 | 23.637 |
| 9/5/2011 16:46:01 | 23.637 |
| 9/5/2011 17:22:01 | 23.637 |
| 9/5/2011 17:58:01 | 23.637 |
| 9/5/2011 18:34:01 | 23.637 |
| 9/5/2011 19:10:01 | 23.637 |
| 9/5/2011 19:46:01 | 23.637 |
| 9/5/2011 20:22:01 | 23.637 |
| 9/5/2011 20:58:01 | 23.637 |
| 9/5/2011 21:34:01 | 23.637 |
| 9/5/2011 22:10:01 | 23.637 |
| 9/5/2011 22:46:01 | 23.637 |
| 9/5/2011 23:22:01 | 23.637 |
| 9/5/2011 23:58:01 | 23.637 |
| 9/6/2011 00:34:01 | 23.637 |
| 9/6/2011 01:10:01 | 23.637 |
| 9/6/2011 01:46:01 | 23.637 |
| 9/6/2011 02:22:01 | 23.637 |
| 9/6/2011 02:58:01 | 23.637 |
| 9/6/2011 03:34:01 | 23.637 |
| 9/6/2011 04:10:01 | 23.637 |
| 9/6/2011 04:46:01 | 23.637 |
| 9/6/2011 05:22:01 | 23.637 |
| 9/6/2011 05:58:01 | 23.637 |
| 9/6/2011 06:34:01 | 23.637 |
| 9/6/2011 07:10:01 | 23.637 |
| 9/6/2011 07:46:01 | 23.637 |
| 9/6/2011 08:22:01 | 23.637 |
| 9/6/2011 08:58:01 | 23.637 |
| 9/6/2011 09:34:01 | 23.637 |
| 9/6/2011 10:10:01 | 23.637 |
| 9/6/2011 10:46:01 | 23.637 |
| 9/6/2011 11:22:01 | 23.637 |
| 9/6/2011 11:58:01 | 23.637 |
| 9/6/2011 12:34:01 | 23.637 |
| 9/6/2011 13:10:01 | 23.637 |
| 9/6/2011 13:46:01 | 23.637 |
| 9/6/2011 14:22:01 | 23.637 |
| 9/6/2011 14:58:01 | 23.637 |
| 9/6/2011 15:34:01 | 23.637 |
| 9/6/2011 16:10:01 | 23.637 |
| 9/6/2011 16:46:01 | 23.637 |
| 9/6/2011 17:22:01 | 23.637 |
| 9/6/2011 17:58:01 | 23.637 |
| 9/6/2011 18:34:01 | 23.637 |
| 9/6/2011 19:10:01 | 23.637 |

|                   |        |
|-------------------|--------|
| 9/6/2011 19:46:01 | 23.637 |
| 9/6/2011 20:22:01 | 23.637 |
| 9/6/2011 20:58:01 | 23.637 |
| 9/6/2011 21:34:01 | 23.637 |
| 9/6/2011 22:10:01 | 23.637 |
| 9/6/2011 22:46:01 | 23.637 |
| 9/6/2011 23:22:01 | 23.637 |
| 9/6/2011 23:58:01 | 23.637 |
| 9/7/2011 00:34:01 | 23.637 |
| 9/7/2011 01:10:01 | 23.637 |
| 9/7/2011 01:46:01 | 23.637 |
| 9/7/2011 02:22:01 | 23.637 |
| 9/7/2011 02:58:01 | 23.637 |
| 9/7/2011 03:34:01 | 23.637 |
| 9/7/2011 04:10:01 | 23.637 |
| 9/7/2011 04:46:01 | 23.637 |
| 9/7/2011 05:22:01 | 23.637 |
| 9/7/2011 05:58:01 | 23.637 |
| 9/7/2011 06:34:01 | 23.637 |
| 9/7/2011 07:10:01 | 23.637 |
| 9/7/2011 07:46:01 | 23.637 |
| 9/7/2011 08:22:01 | 23.637 |
| 9/7/2011 08:58:01 | 23.637 |
| 9/7/2011 09:34:01 | 23.637 |
| 9/7/2011 10:10:01 | 23.637 |
| 9/7/2011 10:46:01 | 23.637 |
| 9/7/2011 11:22:01 | 23.637 |
| 9/7/2011 11:58:01 | 23.637 |
| 9/7/2011 12:34:01 | 23.637 |
| 9/7/2011 13:10:01 | 23.637 |
| 9/7/2011 13:46:01 | 23.637 |
| 9/7/2011 14:22:01 | 23.637 |
| 9/7/2011 14:58:01 | 23.637 |
| 9/7/2011 15:34:01 | 23.637 |
| 9/7/2011 16:10:01 | 23.637 |
| 9/7/2011 16:46:01 | 23.637 |
| 9/7/2011 17:22:01 | 23.637 |
| 9/7/2011 17:58:01 | 23.637 |
| 9/7/2011 18:34:01 | 23.637 |
| 9/7/2011 19:10:01 | 23.637 |
| 9/7/2011 19:46:01 | 23.637 |
| 9/7/2011 20:22:01 | 23.637 |
| 9/7/2011 20:58:01 | 23.637 |
| 9/7/2011 21:34:01 | 23.637 |
| 9/7/2011 22:10:01 | 23.637 |
| 9/7/2011 22:46:01 | 23.637 |
| 9/7/2011 23:22:01 | 23.637 |
| 9/7/2011 23:58:01 | 23.637 |
| 9/8/2011 00:34:01 | 23.637 |
| 9/8/2011 01:10:01 | 23.637 |



|                   |        |
|-------------------|--------|
| 9/8/2011 01:46:01 | 23.637 |
| 9/8/2011 02:22:01 | 23.637 |
| 9/8/2011 02:58:01 | 23.637 |
| 9/8/2011 03:34:01 | 23.637 |
| 9/8/2011 04:10:01 | 23.637 |
| 9/8/2011 04:46:01 | 23.637 |
| 9/8/2011 05:22:01 | 23.637 |
| 9/8/2011 05:58:01 | 23.637 |
| 9/8/2011 06:34:01 | 23.637 |
| 9/8/2011 07:10:01 | 23.637 |
| 9/8/2011 07:46:01 | 23.637 |
| 9/8/2011 08:22:01 | 23.637 |
| 9/8/2011 08:58:01 | 23.637 |
| 9/8/2011 09:34:01 | 23.637 |
| 9/8/2011 10:10:01 | 23.637 |
| 9/8/2011 10:46:01 | 23.637 |
| 9/8/2011 11:22:01 | 23.637 |
| 9/8/2011 11:58:01 | 23.637 |
| 9/8/2011 12:34:01 | 23.637 |
| 9/8/2011 13:10:01 | 23.637 |
| 9/8/2011 13:46:01 | 23.637 |
| 9/8/2011 14:22:01 | 23.637 |
| 9/8/2011 14:58:01 | 23.637 |
| 9/8/2011 15:34:01 | 23.637 |
| 9/8/2011 16:10:01 | 23.637 |
| 9/8/2011 16:46:01 | 23.637 |
| 9/8/2011 17:22:01 | 23.637 |
| 9/8/2011 17:58:01 | 23.637 |
| 9/8/2011 18:34:01 | 23.637 |
| 9/8/2011 19:10:01 | 23.637 |
| 9/8/2011 19:46:01 | 23.637 |
| 9/8/2011 20:22:01 | 23.637 |
| 9/8/2011 20:58:01 | 23.637 |
| 9/8/2011 21:34:01 | 23.637 |
| 9/8/2011 22:10:01 | 23.637 |
| 9/8/2011 22:46:01 | 23.637 |
| 9/8/2011 23:22:01 | 23.637 |
| 9/8/2011 23:58:01 | 23.637 |
| 9/9/2011 00:34:01 | 23.637 |
| 9/9/2011 01:10:01 | 23.637 |
| 9/9/2011 01:46:01 | 23.637 |
| 9/9/2011 02:22:01 | 23.637 |
| 9/9/2011 02:58:01 | 23.637 |
| 9/9/2011 03:34:01 | 23.637 |
| 9/9/2011 04:10:01 | 23.637 |
| 9/9/2011 04:46:01 | 23.637 |
| 9/9/2011 05:22:01 | 23.637 |
| 9/9/2011 05:58:01 | 23.637 |
| 9/9/2011 06:34:01 | 23.637 |
| 9/9/2011 07:10:01 | 23.637 |

|                    |        |
|--------------------|--------|
| 9/9/2011 07:46:01  | 23.637 |
| 9/9/2011 08:22:01  | 23.637 |
| 9/9/2011 08:58:01  | 23.637 |
| 9/9/2011 09:34:01  | 23.637 |
| 9/9/2011 10:10:01  | 23.637 |
| 9/9/2011 10:46:01  | 23.637 |
| 9/9/2011 11:22:01  | 23.637 |
| 9/9/2011 11:58:01  | 23.637 |
| 9/9/2011 12:34:01  | 23.637 |
| 9/9/2011 13:10:01  | 23.637 |
| 9/9/2011 13:46:01  | 23.637 |
| 9/9/2011 14:22:01  | 23.637 |
| 9/9/2011 14:58:01  | 23.637 |
| 9/9/2011 15:34:01  | 23.637 |
| 9/9/2011 16:10:01  | 23.637 |
| 9/9/2011 16:46:01  | 23.637 |
| 9/9/2011 17:22:01  | 23.637 |
| 9/9/2011 17:58:01  | 23.637 |
| 9/9/2011 18:34:01  | 23.637 |
| 9/9/2011 19:10:01  | 23.637 |
| 9/9/2011 19:46:01  | 23.637 |
| 9/9/2011 20:22:01  | 23.637 |
| 9/9/2011 20:58:01  | 23.637 |
| 9/9/2011 21:34:01  | 23.637 |
| 9/9/2011 22:10:01  | 23.637 |
| 9/9/2011 22:46:01  | 23.637 |
| 9/9/2011 23:22:01  | 23.637 |
| 9/9/2011 23:58:01  | 23.637 |
| 9/10/2011 00:34:01 | 23.637 |
| 9/10/2011 01:10:01 | 23.637 |
| 9/10/2011 01:46:01 | 23.637 |
| 9/10/2011 02:22:01 | 23.637 |
| 9/10/2011 02:58:01 | 23.637 |
| 9/10/2011 03:34:01 | 23.637 |
| 9/10/2011 04:10:01 | 23.637 |
| 9/10/2011 04:46:01 | 23.637 |
| 9/10/2011 05:22:01 | 23.637 |
| 9/10/2011 05:58:01 | 23.637 |
| 9/10/2011 06:34:01 | 23.637 |
| 9/10/2011 07:10:01 | 23.637 |
| 9/10/2011 07:46:01 | 23.637 |
| 9/10/2011 08:22:01 | 23.637 |
| 9/10/2011 08:58:01 | 23.637 |
| 9/10/2011 09:34:01 | 23.637 |
| 9/10/2011 10:10:01 | 23.637 |
| 9/10/2011 10:46:01 | 23.637 |
| 9/10/2011 11:22:01 | 23.637 |
| 9/10/2011 11:58:01 | 23.637 |
| 9/10/2011 12:34:01 | 23.637 |
| 9/10/2011 13:10:01 | 23.637 |

|                    |        |
|--------------------|--------|
| 9/10/2011 13:46:01 | 23.637 |
| 9/10/2011 14:22:01 | 23.637 |
| 9/10/2011 14:58:01 | 23.637 |
| 9/10/2011 15:34:01 | 23.637 |
| 9/10/2011 16:10:01 | 23.637 |
| 9/10/2011 16:46:01 | 23.637 |
| 9/10/2011 17:22:01 | 23.637 |
| 9/10/2011 17:58:01 | 23.637 |
| 9/10/2011 18:34:01 | 23.637 |
| 9/10/2011 19:10:01 | 23.637 |
| 9/10/2011 19:46:01 | 23.637 |
| 9/10/2011 20:22:01 | 23.637 |
| 9/10/2011 20:58:01 | 23.637 |
| 9/10/2011 21:34:01 | 23.637 |
| 9/10/2011 22:10:01 | 23.637 |
| 9/10/2011 22:46:01 | 23.637 |
| 9/10/2011 23:22:01 | 23.637 |
| 9/10/2011 23:58:01 | 23.637 |
| 9/11/2011 00:34:01 | 23.637 |
| 9/11/2011 01:10:01 | 23.637 |
| 9/11/2011 01:46:01 | 23.637 |
| 9/11/2011 02:22:01 | 23.637 |
| 9/11/2011 02:58:01 | 23.637 |
| 9/11/2011 03:34:01 | 23.637 |
| 9/11/2011 04:10:01 | 23.637 |
| 9/11/2011 04:46:01 | 23.637 |
| 9/11/2011 05:22:01 | 23.637 |
| 9/11/2011 05:58:01 | 23.637 |
| 9/11/2011 06:34:01 | 23.637 |
| 9/11/2011 07:10:01 | 23.637 |
| 9/11/2011 07:46:01 | 23.637 |
| 9/11/2011 08:22:01 | 23.637 |
| 9/11/2011 08:58:01 | 23.637 |
| 9/11/2011 09:34:01 | 23.637 |
| 9/11/2011 10:10:01 | 23.637 |
| 9/11/2011 10:46:01 | 23.637 |
| 9/11/2011 11:22:01 | 23.637 |
| 9/11/2011 11:58:01 | 23.637 |
| 9/11/2011 12:34:01 | 23.637 |
| 9/11/2011 13:10:01 | 23.637 |
| 9/11/2011 13:46:01 | 23.637 |
| 9/11/2011 14:22:01 | 23.637 |
| 9/11/2011 14:58:01 | 23.637 |
| 9/11/2011 15:34:01 | 23.637 |
| 9/11/2011 16:10:01 | 23.637 |
| 9/11/2011 16:46:01 | 23.637 |
| 9/11/2011 17:22:01 | 23.637 |
| 9/11/2011 17:58:01 | 23.637 |
| 9/11/2011 18:34:01 | 23.637 |
| 9/11/2011 19:10:01 | 23.637 |

|                    |        |
|--------------------|--------|
| 9/11/2011 19:46:01 | 23.637 |
| 9/11/2011 20:22:01 | 23.637 |
| 9/11/2011 20:58:01 | 23.637 |
| 9/11/2011 21:34:01 | 23.637 |
| 9/11/2011 22:10:01 | 23.637 |
| 9/11/2011 22:46:01 | 23.637 |
| 9/11/2011 23:22:01 | 23.637 |
| 9/11/2011 23:58:01 | 23.637 |
| 9/12/2011 00:34:01 | 23.637 |
| 9/12/2011 01:10:01 | 23.637 |
| 9/12/2011 01:46:01 | 23.637 |
| 9/12/2011 02:22:01 | 23.637 |
| 9/12/2011 02:58:01 | 23.637 |
| 9/12/2011 03:34:01 | 23.637 |
| 9/12/2011 04:10:01 | 23.637 |
| 9/12/2011 04:46:01 | 23.637 |
| 9/12/2011 05:22:01 | 23.637 |
| 9/12/2011 05:58:01 | 23.637 |
| 9/12/2011 06:34:01 | 23.637 |
| 9/12/2011 07:10:01 | 23.637 |
| 9/12/2011 07:46:01 | 23.637 |
| 9/12/2011 08:22:01 | 23.637 |
| 9/12/2011 08:58:01 | 23.637 |
| 9/12/2011 09:34:01 | 23.637 |
| 9/12/2011 10:10:01 | 23.637 |
| 9/12/2011 10:46:01 | 23.637 |
| 9/12/2011 11:22:01 | 23.637 |
| 9/12/2011 11:58:01 | 23.637 |
| 9/12/2011 12:34:01 | 23.637 |
| 9/12/2011 13:10:01 | 23.637 |
| 9/12/2011 13:46:01 | 23.637 |
| 9/12/2011 14:22:01 | 23.637 |
| 9/12/2011 14:58:01 | 23.637 |
| 9/12/2011 15:34:01 | 23.637 |
| 9/12/2011 16:10:01 | 23.637 |
| 9/12/2011 16:46:01 | 23.637 |
| 9/12/2011 17:22:01 | 23.637 |
| 9/12/2011 17:58:01 | 23.637 |
| 9/12/2011 18:34:01 | 23.637 |
| 9/12/2011 19:10:01 | 23.637 |
| 9/12/2011 19:46:01 | 23.637 |
| 9/12/2011 20:22:01 | 23.637 |
| 9/12/2011 20:58:01 | 23.637 |
| 9/12/2011 21:34:01 | 23.637 |
| 9/12/2011 22:10:01 | 23.637 |
| 9/12/2011 22:46:01 | 23.637 |
| 9/12/2011 23:22:01 | 23.637 |
| 9/12/2011 23:58:01 | 23.637 |
| 9/13/2011 00:34:01 | 23.637 |
| 9/13/2011 01:10:01 | 23.637 |

|                    |        |
|--------------------|--------|
| 9/13/2011 01:46:01 | 23.637 |
| 9/13/2011 02:22:01 | 23.637 |
| 9/13/2011 02:58:01 | 23.637 |
| 9/13/2011 03:34:01 | 23.637 |
| 9/13/2011 04:10:01 | 23.637 |
| 9/13/2011 04:46:01 | 23.637 |
| 9/13/2011 05:22:01 | 23.637 |
| 9/13/2011 05:58:01 | 23.637 |
| 9/13/2011 06:34:01 | 23.637 |
| 9/13/2011 07:10:01 | 23.637 |
| 9/13/2011 07:46:01 | 23.637 |
| 9/13/2011 08:22:01 | 23.637 |
| 9/13/2011 08:58:01 | 23.637 |
| 9/13/2011 09:34:01 | 23.637 |
| 9/13/2011 10:10:01 | 23.637 |
| 9/13/2011 10:46:01 | 23.637 |
| 9/13/2011 11:22:01 | 23.637 |
| 9/13/2011 11:58:01 | 23.637 |
| 9/13/2011 12:34:01 | 23.637 |
| 9/13/2011 13:10:01 | 23.637 |
| 9/13/2011 13:46:01 | 23.637 |
| 9/13/2011 14:22:01 | 23.637 |
| 9/13/2011 14:58:01 | 23.637 |
| 9/13/2011 15:34:01 | 23.637 |
| 9/13/2011 16:10:01 | 23.637 |
| 9/13/2011 16:46:01 | 23.637 |
| 9/13/2011 17:22:01 | 23.637 |
| 9/13/2011 17:58:01 | 23.637 |
| 9/13/2011 18:34:01 | 23.637 |
| 9/13/2011 19:10:01 | 23.637 |
| 9/13/2011 19:46:01 | 23.637 |
| 9/13/2011 20:22:01 | 23.637 |
| 9/13/2011 20:58:01 | 23.637 |
| 9/13/2011 21:34:01 | 23.637 |
| 9/13/2011 22:10:01 | 23.637 |
| 9/13/2011 22:46:01 | 23.637 |
| 9/13/2011 23:22:01 | 23.637 |
| 9/13/2011 23:58:01 | 23.637 |
| 9/14/2011 00:34:01 | 23.637 |
| 9/14/2011 01:10:01 | 23.637 |
| 9/14/2011 01:46:01 | 23.637 |
| 9/14/2011 02:22:01 | 23.637 |
| 9/14/2011 02:58:01 | 23.637 |
| 9/14/2011 03:34:01 | 23.637 |
| 9/14/2011 04:10:01 | 23.637 |
| 9/14/2011 04:46:01 | 23.637 |
| 9/14/2011 05:22:01 | 23.637 |
| 9/14/2011 05:58:01 | 23.637 |
| 9/14/2011 06:34:01 | 23.637 |
| 9/14/2011 07:10:01 | 23.637 |

|                    |        |
|--------------------|--------|
| 9/14/2011 07:46:01 | 23.637 |
| 9/14/2011 08:22:01 | 23.637 |
| 9/14/2011 08:58:01 | 23.637 |
| 9/14/2011 09:34:01 | 23.637 |
| 9/14/2011 10:10:01 | 23.637 |
| 9/14/2011 10:46:01 | 23.637 |
| 9/14/2011 11:22:01 | 23.637 |
| 9/14/2011 11:58:01 | 23.637 |
| 9/14/2011 12:34:01 | 23.637 |
| 9/14/2011 13:10:01 | 23.637 |
| 9/14/2011 13:46:01 | 23.637 |
| 9/14/2011 14:22:01 | 23.637 |
| 9/14/2011 14:58:01 | 23.637 |
| 9/14/2011 15:34:01 | 23.637 |
| 9/14/2011 16:10:01 | 23.637 |
| 9/14/2011 16:46:01 | 23.637 |
| 9/14/2011 17:22:01 | 23.637 |
| 9/14/2011 17:58:01 | 23.637 |
| 9/14/2011 18:34:01 | 23.637 |
| 9/14/2011 19:10:01 | 23.637 |
| 9/14/2011 19:46:01 | 23.637 |
| 9/14/2011 20:22:01 | 23.637 |
| 9/14/2011 20:58:01 | 23.637 |
| 9/14/2011 21:34:01 | 23.637 |
| 9/14/2011 22:10:01 | 23.637 |
| 9/14/2011 22:46:01 | 23.637 |
| 9/14/2011 23:22:01 | 23.637 |
| 9/14/2011 23:58:01 | 23.637 |
| 9/15/2011 00:34:01 | 23.637 |
| 9/15/2011 01:10:01 | 23.637 |
| 9/15/2011 01:46:01 | 23.637 |
| 9/15/2011 02:22:01 | 23.637 |
| 9/15/2011 02:58:01 | 23.637 |
| 9/15/2011 03:34:01 | 23.637 |
| 9/15/2011 04:10:01 | 23.637 |
| 9/15/2011 04:46:01 | 23.637 |
| 9/15/2011 05:22:01 | 23.637 |
| 9/15/2011 05:58:01 | 23.637 |
| 9/15/2011 06:34:01 | 23.637 |
| 9/15/2011 07:10:01 | 23.637 |
| 9/15/2011 07:46:01 | 23.637 |
| 9/15/2011 08:22:01 | 23.637 |
| 9/15/2011 08:58:01 | 23.637 |
| 9/15/2011 09:34:01 | 23.637 |
| 9/15/2011 10:10:01 | 23.637 |
| 9/15/2011 10:46:01 | 23.637 |
| 9/15/2011 11:22:01 | 23.637 |
| 9/15/2011 11:58:01 | 23.637 |
| 9/15/2011 12:34:01 | 23.637 |
| 9/15/2011 13:10:01 | 23.637 |

|                    |        |
|--------------------|--------|
| 9/15/2011 13:46:01 | 23.637 |
| 9/15/2011 14:22:01 | 23.637 |
| 9/15/2011 14:58:01 | 23.637 |
| 9/15/2011 15:34:01 | 23.637 |
| 9/15/2011 16:10:01 | 23.637 |
| 9/15/2011 16:46:01 | 23.637 |
| 9/15/2011 17:22:01 | 23.637 |
| 9/15/2011 17:58:01 | 23.637 |
| 9/15/2011 18:34:01 | 23.637 |
| 9/15/2011 19:10:01 | 23.637 |
| 9/15/2011 19:46:01 | 23.637 |
| 9/15/2011 20:22:01 | 23.637 |
| 9/15/2011 20:58:01 | 23.637 |
| 9/15/2011 21:34:01 | 23.637 |
| 9/15/2011 22:10:01 | 23.637 |
| 9/15/2011 22:46:01 | 23.637 |
| 9/15/2011 23:22:01 | 23.637 |
| 9/15/2011 23:58:01 | 23.637 |
| 9/16/2011 00:34:01 | 23.637 |
| 9/16/2011 01:10:01 | 23.637 |
| 9/16/2011 01:46:01 | 23.637 |
| 9/16/2011 02:22:01 | 23.637 |
| 9/16/2011 02:58:01 | 23.637 |
| 9/16/2011 03:34:01 | 23.637 |
| 9/16/2011 04:10:01 | 23.637 |
| 9/16/2011 04:46:01 | 23.637 |
| 9/16/2011 05:22:01 | 23.637 |
| 9/16/2011 05:58:01 | 23.637 |
| 9/16/2011 06:34:01 | 23.637 |
| 9/16/2011 07:10:01 | 23.637 |
| 9/16/2011 07:46:01 | 23.637 |
| 9/16/2011 08:22:01 | 23.637 |
| 9/16/2011 08:58:01 | 23.637 |
| 9/16/2011 09:34:01 | 23.637 |
| 9/16/2011 10:10:01 | 23.637 |
| 9/16/2011 10:46:01 | 23.637 |
| 9/16/2011 11:22:01 | 23.637 |
| 9/16/2011 11:58:01 | 23.637 |
| 9/16/2011 12:34:01 | 23.637 |
| 9/16/2011 13:10:01 | 23.637 |
| 9/16/2011 13:46:01 | 23.637 |
| 9/16/2011 14:22:01 | 23.637 |
| 9/16/2011 14:58:01 | 23.637 |
| 9/16/2011 15:34:01 | 23.637 |
| 9/16/2011 16:10:01 | 23.637 |
| 9/16/2011 16:46:01 | 23.637 |
| 9/16/2011 17:22:01 | 23.637 |
| 9/16/2011 17:58:01 | 23.637 |
| 9/16/2011 18:34:01 | 23.637 |
| 9/16/2011 19:10:01 | 23.637 |

|                    |        |
|--------------------|--------|
| 9/16/2011 19:46:01 | 23.637 |
| 9/16/2011 20:22:01 | 23.637 |
| 9/16/2011 20:58:01 | 23.637 |
| 9/16/2011 21:34:01 | 23.637 |
| 9/16/2011 22:10:01 | 24.137 |
| 9/16/2011 22:46:01 | 24.137 |
| 9/16/2011 23:22:01 | 24.137 |
| 9/16/2011 23:58:01 | 24.137 |
| 9/17/2011 00:34:01 | 24.137 |
| 9/17/2011 01:10:01 | 24.137 |
| 9/17/2011 01:46:01 | 24.137 |
| 9/17/2011 02:22:01 | 24.137 |
| 9/17/2011 02:58:01 | 24.137 |
| 9/17/2011 03:34:01 | 24.137 |
| 9/17/2011 04:10:01 | 24.137 |
| 9/17/2011 04:46:01 | 24.137 |
| 9/17/2011 05:22:01 | 24.137 |
| 9/17/2011 05:58:01 | 24.137 |
| 9/17/2011 06:34:01 | 24.137 |
| 9/17/2011 07:10:01 | 24.137 |
| 9/17/2011 07:46:01 | 24.137 |
| 9/17/2011 08:22:01 | 24.137 |
| 9/17/2011 08:58:01 | 24.137 |
| 9/17/2011 09:34:01 | 24.137 |
| 9/17/2011 10:10:01 | 24.137 |
| 9/17/2011 10:46:01 | 24.137 |
| 9/17/2011 11:22:01 | 24.137 |
| 9/17/2011 11:58:01 | 24.137 |
| 9/17/2011 12:34:01 | 24.137 |
| 9/17/2011 13:10:01 | 24.137 |
| 9/17/2011 13:46:01 | 24.137 |
| 9/17/2011 14:22:01 | 24.137 |
| 9/17/2011 14:58:01 | 24.137 |
| 9/17/2011 15:34:01 | 24.137 |
| 9/17/2011 16:10:01 | 24.137 |
| 9/17/2011 16:46:01 | 24.137 |
| 9/17/2011 17:22:01 | 24.137 |
| 9/17/2011 17:58:01 | 24.137 |
| 9/17/2011 18:34:01 | 24.137 |
| 9/17/2011 19:10:01 | 24.137 |
| 9/17/2011 19:46:01 | 24.137 |
| 9/17/2011 20:22:01 | 24.137 |
| 9/17/2011 20:58:01 | 24.137 |
| 9/17/2011 21:34:01 | 24.137 |
| 9/17/2011 22:10:01 | 24.137 |
| 9/17/2011 22:46:01 | 24.137 |
| 9/17/2011 23:22:01 | 24.137 |
| 9/17/2011 23:58:01 | 24.137 |
| 9/18/2011 00:34:01 | 24.137 |
| 9/18/2011 01:10:01 | 24.137 |



|                    |        |
|--------------------|--------|
| 9/18/2011 01:46:01 | 24.137 |
| 9/18/2011 02:22:01 | 24.137 |
| 9/18/2011 02:58:01 | 24.137 |
| 9/18/2011 03:34:01 | 24.137 |
| 9/18/2011 04:10:01 | 24.137 |
| 9/18/2011 04:46:01 | 24.137 |
| 9/18/2011 05:22:01 | 24.137 |
| 9/18/2011 05:58:01 | 24.137 |
| 9/18/2011 06:34:01 | 24.137 |
| 9/18/2011 07:10:01 | 24.137 |
| 9/18/2011 07:46:01 | 24.137 |
| 9/18/2011 08:22:01 | 24.137 |
| 9/18/2011 08:58:01 | 24.137 |
| 9/18/2011 09:34:01 | 24.137 |
| 9/18/2011 10:10:01 | 24.137 |
| 9/18/2011 10:46:01 | 24.137 |
| 9/18/2011 11:22:01 | 24.137 |
| 9/18/2011 11:58:01 | 24.137 |
| 9/18/2011 12:34:01 | 24.137 |
| 9/18/2011 13:10:01 | 24.137 |
| 9/18/2011 13:46:01 | 24.137 |
| 9/18/2011 14:22:01 | 24.137 |
| 9/18/2011 14:58:01 | 24.137 |
| 9/18/2011 15:34:01 | 24.137 |
| 9/18/2011 16:10:01 | 24.137 |
| 9/18/2011 16:46:01 | 24.137 |
| 9/18/2011 17:22:01 | 24.137 |
| 9/18/2011 17:58:01 | 24.137 |
| 9/18/2011 18:34:01 | 24.137 |
| 9/18/2011 19:10:01 | 24.137 |
| 9/18/2011 19:46:01 | 24.137 |
| 9/18/2011 20:22:01 | 24.137 |
| 9/18/2011 20:58:01 | 24.137 |
| 9/18/2011 21:34:01 | 24.137 |
| 9/18/2011 22:10:01 | 24.137 |
| 9/18/2011 22:46:01 | 24.137 |
| 9/18/2011 23:22:01 | 24.137 |
| 9/18/2011 23:58:01 | 24.137 |
| 9/19/2011 00:34:01 | 24.137 |
| 9/19/2011 01:10:01 | 24.137 |
| 9/19/2011 01:46:01 | 24.137 |
| 9/19/2011 02:22:01 | 24.137 |
| 9/19/2011 02:58:01 | 24.137 |
| 9/19/2011 03:34:01 | 24.137 |
| 9/19/2011 04:10:01 | 24.137 |
| 9/19/2011 04:46:01 | 24.137 |
| 9/19/2011 05:22:01 | 24.137 |
| 9/19/2011 05:58:01 | 24.137 |
| 9/19/2011 06:34:01 | 24.137 |
| 9/19/2011 07:10:01 | 24.137 |

|                    |        |
|--------------------|--------|
| 9/19/2011 07:46:01 | 24.137 |
| 9/19/2011 08:22:01 | 24.137 |
| 9/19/2011 08:58:01 | 24.137 |
| 9/19/2011 09:34:01 | 24.137 |
| 9/19/2011 10:10:01 | 24.137 |
| 9/19/2011 10:46:01 | 24.137 |
| 9/19/2011 11:22:01 | 24.137 |
| 9/19/2011 11:58:01 | 24.137 |
| 9/19/2011 12:34:01 | 24.137 |
| 9/19/2011 13:10:01 | 24.137 |
| 9/19/2011 13:46:01 | 24.137 |
| 9/19/2011 14:22:01 | 24.137 |
| 9/19/2011 14:58:01 | 24.137 |
| 9/19/2011 15:34:01 | 24.137 |
| 9/19/2011 16:10:01 | 24.137 |
| 9/19/2011 16:46:01 | 24.137 |
| 9/19/2011 17:22:01 | 24.137 |
| 9/19/2011 17:58:01 | 24.137 |
| 9/19/2011 18:34:01 | 24.137 |
| 9/19/2011 19:10:01 | 24.137 |
| 9/19/2011 19:46:01 | 24.137 |
| 9/19/2011 20:22:01 | 24.137 |
| 9/19/2011 20:58:01 | 24.137 |
| 9/19/2011 21:34:01 | 24.137 |
| 9/19/2011 22:10:01 | 24.137 |
| 9/19/2011 22:46:01 | 24.137 |
| 9/19/2011 23:22:01 | 24.137 |
| 9/19/2011 23:58:01 | 24.137 |
| 9/20/2011 00:34:01 | 24.137 |
| 9/20/2011 01:10:01 | 24.137 |
| 9/20/2011 01:46:01 | 24.137 |
| 9/20/2011 02:22:01 | 24.137 |
| 9/20/2011 02:58:01 | 24.137 |
| 9/20/2011 03:34:01 | 24.137 |
| 9/20/2011 04:10:01 | 24.137 |
| 9/20/2011 04:46:01 | 24.137 |
| 9/20/2011 05:22:01 | 24.137 |
| 9/20/2011 05:58:01 | 24.137 |
| 9/20/2011 06:34:01 | 24.137 |
| 9/20/2011 07:10:01 | 24.137 |
| 9/20/2011 07:46:01 | 24.137 |
| 9/20/2011 08:22:01 | 24.137 |
| 9/20/2011 08:58:01 | 24.137 |
| 9/20/2011 09:34:01 | 24.137 |
| 9/20/2011 10:10:01 | 24.137 |
| 9/20/2011 10:46:01 | 24.137 |
| 9/20/2011 11:22:01 | 24.137 |
| 9/20/2011 11:58:01 | 24.137 |
| 9/20/2011 12:34:01 | 24.137 |
| 9/20/2011 13:10:01 | 24.137 |

|                    |        |
|--------------------|--------|
| 9/20/2011 13:46:01 | 24.137 |
| 9/20/2011 14:22:01 | 24.137 |
| 9/20/2011 14:58:01 | 24.137 |
| 9/20/2011 15:34:01 | 24.137 |
| 9/20/2011 16:10:01 | 24.137 |
| 9/20/2011 16:46:01 | 24.137 |
| 9/20/2011 17:22:01 | 24.137 |
| 9/20/2011 17:58:01 | 24.137 |
| 9/20/2011 18:34:01 | 24.137 |
| 9/20/2011 19:10:01 | 24.137 |
| 9/20/2011 19:46:01 | 24.137 |
| 9/20/2011 20:22:01 | 24.137 |
| 9/20/2011 20:58:01 | 24.137 |
| 9/20/2011 21:34:01 | 24.137 |
| 9/20/2011 22:10:01 | 24.137 |
| 9/20/2011 22:46:01 | 24.137 |
| 9/20/2011 23:22:01 | 24.137 |
| 9/20/2011 23:58:01 | 24.137 |
| 9/21/2011 00:34:01 | 24.137 |
| 9/21/2011 01:10:01 | 24.137 |
| 9/21/2011 01:46:01 | 24.137 |
| 9/21/2011 02:22:01 | 24.137 |
| 9/21/2011 02:58:01 | 24.137 |
| 9/21/2011 03:34:01 | 24.137 |
| 9/21/2011 04:10:01 | 24.637 |
| 9/21/2011 04:46:01 | 24.637 |
| 9/21/2011 05:22:01 | 24.637 |
| 9/21/2011 05:58:01 | 24.637 |
| 9/21/2011 06:34:01 | 24.637 |
| 9/21/2011 07:10:01 | 24.637 |
| 9/21/2011 07:46:01 | 24.637 |
| 9/21/2011 08:22:01 | 24.637 |
| 9/21/2011 08:58:01 | 24.137 |
| 9/21/2011 09:34:01 | 24.137 |
| 9/21/2011 10:10:01 | 24.137 |
| 9/21/2011 10:46:01 | 24.137 |
| 9/21/2011 11:22:01 | 24.137 |
| 9/21/2011 11:58:01 | 24.137 |
| 9/21/2011 12:34:01 | 24.137 |
| 9/21/2011 13:10:01 | 24.137 |
| 9/21/2011 13:46:01 | 24.137 |
| 9/21/2011 14:22:01 | 24.137 |
| 9/21/2011 14:58:01 | 24.137 |
| 9/21/2011 15:34:01 | 24.137 |
| 9/21/2011 16:10:01 | 24.137 |
| 9/21/2011 16:46:01 | 24.137 |
| 9/21/2011 17:22:01 | 24.137 |
| 9/21/2011 17:58:01 | 24.137 |
| 9/21/2011 18:34:01 | 24.137 |
| 9/21/2011 19:10:01 | 24.137 |

|                    |        |
|--------------------|--------|
| 9/21/2011 19:46:01 | 24.137 |
| 9/21/2011 20:22:01 | 24.137 |
| 9/21/2011 20:58:01 | 24.637 |
| 9/21/2011 21:34:01 | 24.637 |
| 9/21/2011 22:10:01 | 24.637 |
| 9/21/2011 22:46:01 | 24.637 |
| 9/21/2011 23:22:01 | 24.637 |
| 9/21/2011 23:58:01 | 24.637 |
| 9/22/2011 00:34:01 | 24.637 |
| 9/22/2011 01:10:01 | 24.637 |
| 9/22/2011 01:46:01 | 24.637 |
| 9/22/2011 02:22:01 | 24.637 |
| 9/22/2011 02:58:01 | 24.637 |
| 9/22/2011 03:34:01 | 24.637 |
| 9/22/2011 04:10:01 | 24.637 |
| 9/22/2011 04:46:01 | 24.637 |
| 9/22/2011 05:22:01 | 24.637 |
| 9/22/2011 05:58:01 | 24.637 |
| 9/22/2011 06:34:01 | 24.637 |
| 9/22/2011 07:10:01 | 24.637 |
| 9/22/2011 07:46:01 | 24.637 |
| 9/22/2011 08:22:01 | 24.637 |
| 9/22/2011 08:58:01 | 24.637 |
| 9/22/2011 09:34:01 | 24.637 |
| 9/22/2011 10:10:01 | 24.637 |
| 9/22/2011 10:46:01 | 24.637 |
| 9/22/2011 11:22:01 | 24.637 |
| 9/22/2011 11:58:01 | 24.637 |
| 9/22/2011 12:34:01 | 24.637 |
| 9/22/2011 13:10:01 | 24.637 |
| 9/22/2011 13:46:01 | 24.637 |
| 9/22/2011 14:22:01 | 24.637 |
| 9/22/2011 14:58:01 | 24.637 |
| 9/22/2011 15:34:01 | 24.637 |
| 9/22/2011 16:10:01 | 24.637 |
| 9/22/2011 16:46:01 | 24.637 |
| 9/22/2011 17:22:01 | 24.637 |
| 9/22/2011 17:58:01 | 24.637 |
| 9/22/2011 18:34:01 | 24.637 |
| 9/22/2011 19:10:01 | 24.637 |
| 9/22/2011 19:46:01 | 24.637 |
| 9/22/2011 20:22:01 | 24.637 |
| 9/22/2011 20:58:01 | 24.637 |
| 9/22/2011 21:34:01 | 24.637 |
| 9/22/2011 22:10:01 | 24.637 |
| 9/22/2011 22:46:01 | 24.637 |
| 9/22/2011 23:22:01 | 24.637 |
| 9/22/2011 23:58:01 | 25.137 |
| 9/23/2011 00:34:01 | 25.137 |
| 9/23/2011 01:10:01 | 25.137 |

|                    |        |
|--------------------|--------|
| 9/23/2011 01:46:01 | 25.137 |
| 9/23/2011 02:22:01 | 25.137 |
| 9/23/2011 02:58:01 | 25.137 |
| 9/23/2011 03:34:01 | 25.137 |
| 9/23/2011 04:10:01 | 25.137 |
| 9/23/2011 04:46:01 | 25.137 |
| 9/23/2011 05:22:01 | 25.137 |
| 9/23/2011 05:58:01 | 25.137 |
| 9/23/2011 06:34:01 | 25.137 |
| 9/23/2011 07:10:01 | 25.137 |
| 9/23/2011 07:46:01 | 24.637 |
| 9/23/2011 08:22:01 | 25.137 |
| 9/23/2011 08:58:01 | 25.137 |
| 9/23/2011 09:34:01 | 25.137 |
| 9/23/2011 10:10:01 | 25.137 |
| 9/23/2011 10:46:01 | 25.137 |
| 9/23/2011 11:22:01 | 25.137 |
| 9/23/2011 11:58:01 | 25.137 |
| 9/23/2011 12:34:01 | 25.137 |
| 9/23/2011 13:10:01 | 25.137 |
| 9/23/2011 13:46:01 | 25.137 |
| 9/23/2011 14:22:01 | 25.137 |
| 9/23/2011 14:58:01 | 24.637 |
| 9/23/2011 15:34:01 | 24.637 |
| 9/23/2011 16:10:01 | 25.137 |
| 9/23/2011 16:46:01 | 25.137 |
| 9/23/2011 17:22:01 | 25.137 |
| 9/23/2011 17:58:01 | 25.137 |
| 9/23/2011 18:34:01 | 25.137 |
| 9/23/2011 19:10:01 | 25.137 |
| 9/23/2011 19:46:01 | 25.137 |
| 9/23/2011 20:22:01 | 25.137 |
| 9/23/2011 20:58:01 | 25.137 |
| 9/23/2011 21:34:01 | 25.137 |
| 9/23/2011 22:10:01 | 25.137 |
| 9/23/2011 22:46:01 | 25.137 |
| 9/23/2011 23:22:01 | 25.137 |
| 9/23/2011 23:58:01 | 25.137 |
| 9/24/2011 00:34:01 | 25.137 |
| 9/24/2011 01:10:01 | 25.137 |
| 9/24/2011 01:46:01 | 25.137 |
| 9/24/2011 02:22:01 | 25.137 |
| 9/24/2011 02:58:01 | 25.137 |
| 9/24/2011 03:34:01 | 25.137 |
| 9/24/2011 04:10:01 | 25.137 |
| 9/24/2011 04:46:01 | 25.137 |
| 9/24/2011 05:22:01 | 25.137 |
| 9/24/2011 05:58:01 | 25.137 |
| 9/24/2011 06:34:01 | 25.137 |
| 9/24/2011 07:10:01 | 25.137 |

|                    |        |
|--------------------|--------|
| 9/24/2011 07:46:01 | 25.137 |
| 9/24/2011 08:22:01 | 25.137 |
| 9/24/2011 08:58:01 | 25.137 |
| 9/24/2011 09:34:01 | 25.137 |
| 9/24/2011 10:10:01 | 25.137 |
| 9/24/2011 10:46:01 | 25.137 |
| 9/24/2011 11:22:01 | 25.137 |
| 9/24/2011 11:58:01 | 25.137 |
| 9/24/2011 12:34:01 | 25.137 |
| 9/24/2011 13:10:01 | 25.137 |
| 9/24/2011 13:46:01 | 25.137 |
| 9/24/2011 14:22:01 | 25.137 |
| 9/24/2011 14:58:01 | 25.137 |
| 9/24/2011 15:34:01 | 25.137 |
| 9/24/2011 16:10:01 | 25.137 |
| 9/24/2011 16:46:01 | 25.137 |
| 9/24/2011 17:22:01 | 25.137 |
| 9/24/2011 17:58:01 | 25.137 |
| 9/24/2011 18:34:01 | 25.137 |
| 9/24/2011 19:10:01 | 25.137 |
| 9/24/2011 19:46:01 | 25.137 |
| 9/24/2011 20:22:01 | 25.137 |
| 9/24/2011 20:58:01 | 25.137 |
| 9/24/2011 21:34:01 | 25.137 |
| 9/24/2011 22:10:01 | 25.137 |
| 9/24/2011 22:46:01 | 25.137 |
| 9/24/2011 23:22:01 | 25.137 |
| 9/24/2011 23:58:01 | 25.137 |
| 9/25/2011 00:34:01 | 25.137 |
| 9/25/2011 01:10:01 | 25.137 |
| 9/25/2011 01:46:01 | 25.137 |
| 9/25/2011 02:22:01 | 25.137 |
| 9/25/2011 02:58:01 | 25.137 |
| 9/25/2011 03:34:01 | 25.137 |
| 9/25/2011 04:10:01 | 25.137 |
| 9/25/2011 04:46:01 | 25.137 |
| 9/25/2011 05:22:01 | 25.137 |
| 9/25/2011 05:58:01 | 25.137 |
| 9/25/2011 06:34:01 | 25.137 |
| 9/25/2011 07:10:01 | 25.137 |
| 9/25/2011 07:46:01 | 25.137 |
| 9/25/2011 08:22:01 | 25.137 |
| 9/25/2011 08:58:01 | 25.137 |
| 9/25/2011 09:34:01 | 25.137 |
| 9/25/2011 10:10:01 | 25.137 |
| 9/25/2011 10:46:01 | 25.137 |
| 9/25/2011 11:22:01 | 25.137 |
| 9/25/2011 11:58:01 | 25.137 |
| 9/25/2011 12:34:01 | 25.137 |
| 9/25/2011 13:10:01 | 25.137 |

|                    |        |
|--------------------|--------|
| 9/25/2011 13:46:01 | 25.137 |
| 9/25/2011 14:22:01 | 25.137 |
| 9/25/2011 14:58:01 | 25.137 |
| 9/25/2011 15:34:01 | 25.137 |
| 9/25/2011 16:10:01 | 25.137 |
| 9/25/2011 16:46:01 | 25.137 |
| 9/25/2011 17:22:01 | 25.137 |
| 9/25/2011 17:58:01 | 25.137 |
| 9/25/2011 18:34:01 | 25.137 |
| 9/25/2011 19:10:01 | 25.137 |
| 9/25/2011 19:46:01 | 25.137 |
| 9/25/2011 20:22:01 | 25.137 |
| 9/25/2011 20:58:01 | 25.137 |
| 9/25/2011 21:34:01 | 25.137 |
| 9/25/2011 22:10:01 | 25.137 |
| 9/25/2011 22:46:01 | 25.137 |
| 9/25/2011 23:22:01 | 25.137 |
| 9/25/2011 23:58:01 | 25.137 |
| 9/26/2011 00:34:01 | 25.137 |
| 9/26/2011 01:10:01 | 25.137 |
| 9/26/2011 01:46:01 | 25.137 |
| 9/26/2011 02:22:01 | 25.137 |
| 9/26/2011 02:58:01 | 25.137 |
| 9/26/2011 03:34:01 | 25.137 |
| 9/26/2011 04:10:01 | 25.137 |
| 9/26/2011 04:46:01 | 25.137 |
| 9/26/2011 05:22:01 | 25.137 |
| 9/26/2011 05:58:01 | 25.137 |
| 9/26/2011 06:34:01 | 25.137 |
| 9/26/2011 07:10:01 | 25.137 |
| 9/26/2011 07:46:01 | 25.137 |
| 9/26/2011 08:22:01 | 25.137 |
| 9/26/2011 08:58:01 | 25.137 |
| 9/26/2011 09:34:01 | 25.137 |
| 9/26/2011 10:10:01 | 25.137 |
| 9/26/2011 10:46:01 | 25.137 |
| 9/26/2011 11:22:01 | 25.137 |
| 9/26/2011 11:58:01 | 25.137 |
| 9/26/2011 12:34:01 | 25.137 |
| 9/26/2011 13:10:01 | 25.137 |
| 9/26/2011 13:46:01 | 25.137 |
| 9/26/2011 14:22:01 | 25.137 |
| 9/26/2011 14:58:01 | 25.137 |
| 9/26/2011 15:34:01 | 25.137 |
| 9/26/2011 16:10:01 | 25.137 |
| 9/26/2011 16:46:01 | 26.137 |
| 9/26/2011 17:22:01 | 27.137 |
| 9/26/2011 17:58:01 | 28.136 |
| 9/26/2011 18:34:01 | 29.135 |
| 9/26/2011 19:10:01 | 29.634 |

|                    |        |
|--------------------|--------|
| 9/26/2011 19:46:01 | 30.134 |
| 9/26/2011 20:22:01 | 30.633 |
| 9/26/2011 20:58:01 | 30.633 |
| 9/26/2011 21:34:01 | 30.633 |
| 9/26/2011 22:10:01 | 30.633 |
| 9/26/2011 22:46:01 | 30.633 |
| 9/26/2011 23:22:01 | 30.134 |
| 9/26/2011 23:58:01 | 30.134 |











































































































































































































































































































| <b>Valley black bulb Ta time</b> | <b>Valley Ta black bulb</b> | <b>Soil Temp time (0 mm, surface)</b> | <b>Soil temp (0 mm, surface)</b> | <b>Time: tenrec eaten by snake</b> |
|----------------------------------|-----------------------------|---------------------------------------|----------------------------------|------------------------------------|
| 11/9/2010 17:05:01               | 34.719                      | 11/8/2010 00:09:01                    | 27.175                           | 12/6/2010 15:46:01                 |
| 11/9/2010 17:25:01               | 33.597                      | 11/8/2010 00:29:01                    | 27.175                           | 12/6/2010 16:18:01                 |
| 11/9/2010 17:45:01               | 32.475                      | 11/8/2010 00:49:01                    | 27.175                           | 12/6/2010 16:50:01                 |
| 11/9/2010 18:05:01               | 31.415                      | 11/8/2010 01:09:01                    | 27.175                           | 12/6/2010 17:22:01                 |
| 11/9/2010 18:25:01               | 29.731                      | 11/8/2010 01:29:01                    | 27.175                           | 12/6/2010 17:54:01                 |
| 11/9/2010 18:45:01               | 28.420                      | 11/8/2010 01:49:01                    | 27.112                           | 12/6/2010 18:26:01                 |
| 11/9/2010 19:05:01               | 27.483                      | 11/8/2010 02:09:01                    | 27.112                           | 12/6/2010 18:58:01                 |
| 11/9/2010 19:25:01               | 26.609                      | 11/8/2010 02:29:01                    | 27.112                           | 12/6/2010 19:30:01                 |
| 11/9/2010 19:45:01               | 26.359                      | 11/8/2010 02:49:01                    | 27.112                           | 12/6/2010 20:02:01                 |
| 11/9/2010 20:05:01               | 27.358                      | 11/8/2010 03:09:01                    | 27.112                           | 12/6/2010 20:34:01                 |
| 11/9/2010 20:25:01               | 27.920                      | 11/8/2010 03:29:01                    | 27.112                           | 12/6/2010 21:06:01                 |
| 11/9/2010 20:45:01               | 27.983                      | 11/8/2010 03:49:01                    | 27.112                           | 12/6/2010 21:38:01                 |
| 11/9/2010 21:05:01               | 27.983                      | 11/8/2010 04:09:01                    | 27.112                           | 12/6/2010 22:10:01                 |
| 11/9/2010 21:25:01               | 27.546                      | 11/8/2010 04:29:01                    | 27.050                           | 12/6/2010 22:42:01                 |
| 11/9/2010 21:45:01               | 26.546                      | 11/8/2010 04:49:01                    | 27.050                           | 12/6/2010 23:14:01                 |
| 11/9/2010 22:05:01               | 25.672                      | 11/8/2010 05:09:01                    | 27.050                           | 12/6/2010 23:46:01                 |
| 11/9/2010 22:25:01               | 24.797                      | 11/8/2010 05:29:01                    | 27.050                           | 12/7/2010 00:18:01                 |
| 11/9/2010 22:45:01               | 24.047                      | 11/8/2010 05:49:01                    | 26.987                           | 12/7/2010 00:50:01                 |
| 11/9/2010 23:05:01               | 23.547                      | 11/8/2010 06:09:01                    | 26.987                           | 12/7/2010 01:22:01                 |
| 11/9/2010 23:25:01               | 23.047                      | 11/8/2010 06:29:01                    | 26.987                           | 12/7/2010 01:54:01                 |
| 11/9/2010 23:45:01               | 22.609                      | 11/8/2010 06:49:01                    | 26.987                           | 12/7/2010 02:26:01                 |
| 11/10/2010 00:05:01              | 22.171                      | 11/8/2010 07:09:01                    | 26.987                           | 12/7/2010 02:58:01                 |
| 11/10/2010 00:25:01              | 21.733                      | 11/8/2010 07:29:01                    | 26.925                           | 12/7/2010 03:30:01                 |
| 11/10/2010 00:45:01              | 21.358                      | 11/8/2010 07:49:01                    | 26.925                           | 12/7/2010 04:02:01                 |
| 11/10/2010 01:05:01              | 21.045                      | 11/8/2010 08:09:01                    | 26.925                           | 12/7/2010 04:34:01                 |
| 11/10/2010 01:25:01              | 20.732                      | 11/8/2010 08:29:01                    | 26.862                           | 12/7/2010 05:06:01                 |
| 11/10/2010 01:45:01              | 20.544                      | 11/8/2010 08:49:01                    | 26.862                           | 12/7/2010 05:38:01                 |
| 11/10/2010 02:05:01              | 20.169                      | 11/8/2010 09:09:01                    | 26.862                           | 12/7/2010 06:10:01                 |
| 11/10/2010 02:25:01              | 19.793                      | 11/8/2010 09:29:01                    | 26.862                           | 12/7/2010 06:42:01                 |
| 11/10/2010 02:45:01              | 19.480                      | 11/8/2010 09:49:01                    | 26.800                           | 12/7/2010 07:14:01                 |
| 11/10/2010 03:05:01              | 19.042                      | 11/8/2010 10:09:01                    | 26.800                           | 12/7/2010 07:46:01                 |
| 11/10/2010 03:25:01              | 18.917                      | 11/8/2010 10:29:01                    | 26.800                           | 12/7/2010 08:18:01                 |
| 11/10/2010 03:45:01              | 18.666                      | 11/8/2010 10:49:01                    | 26.800                           | 12/7/2010 08:50:01                 |
| 11/10/2010 04:05:01              | 18.541                      | 11/8/2010 11:09:01                    | 26.738                           | 12/7/2010 09:22:01                 |
| 11/10/2010 04:25:01              | 18.353                      | 11/8/2010 11:29:01                    | 26.738                           | 12/7/2010 09:54:01                 |
| 11/10/2010 04:45:01              | 18.103                      | 11/8/2010 11:49:01                    | 26.738                           | 12/7/2010 10:26:01                 |
| 11/10/2010 05:05:01              | 17.978                      | 11/8/2010 12:09:01                    | 26.738                           | 12/7/2010 10:58:01                 |
| 11/10/2010 05:25:01              | 18.040                      | 11/8/2010 12:29:01                    | 26.800                           | 12/7/2010 11:30:01                 |
| 11/10/2010 05:45:01              | 18.228                      | 11/8/2010 12:49:01                    | 26.800                           | 12/7/2010 12:02:01                 |
| 11/10/2010 06:05:01              | 18.792                      | 11/8/2010 13:09:01                    | 26.800                           | 12/7/2010 12:34:01                 |
| 11/10/2010 06:25:01              | 20.231                      | 11/8/2010 13:29:01                    | 26.800                           | 12/7/2010 13:06:01                 |
| 11/10/2010 06:45:01              | 22.546                      | 11/8/2010 13:49:01                    | 26.862                           | 12/7/2010 13:38:01                 |
| 11/10/2010 07:05:01              | 26.172                      | 11/8/2010 14:09:01                    | 26.862                           | 12/7/2010 14:10:01                 |
| 11/10/2010 07:25:01              | 28.545                      | 11/8/2010 14:29:01                    | 26.862                           | 12/7/2010 14:42:01                 |
| 11/10/2010 07:45:01              | 29.980                      | 11/8/2010 14:49:01                    | 26.925                           | 12/7/2010 15:14:01                 |

|                     |        |                    |        |                    |
|---------------------|--------|--------------------|--------|--------------------|
| 11/10/2010 08:05:01 | 32.538 | 11/8/2010 15:09:01 | 26.925 | 12/7/2010 15:46:01 |
| 11/10/2010 08:25:01 | 32.288 | 11/8/2010 15:29:01 | 26.925 | 12/7/2010 16:18:01 |
| 11/10/2010 08:45:01 | 32.351 | 11/8/2010 15:49:01 | 26.987 | 12/7/2010 16:50:01 |
| 11/10/2010 09:05:01 | 32.974 | 11/8/2010 16:09:01 | 26.987 | 12/7/2010 17:22:01 |
| 11/10/2010 09:25:01 | 34.408 | 11/8/2010 16:29:01 | 27.050 | 12/7/2010 17:54:01 |
| 11/10/2010 09:45:01 | 36.027 | 11/8/2010 16:49:01 | 27.050 | 12/7/2010 18:26:01 |
| 11/10/2010 10:05:01 | 36.214 | 11/8/2010 17:09:01 | 27.112 | 12/7/2010 18:58:01 |
| 11/10/2010 10:25:01 | 36.712 | 11/8/2010 17:29:01 | 27.112 | 12/7/2010 19:30:01 |
| 11/10/2010 10:45:01 | 37.086 | 11/8/2010 17:49:01 | 27.175 | 12/7/2010 20:02:01 |
| 11/10/2010 11:05:01 | 37.397 | 11/8/2010 18:09:01 | 27.175 | 12/7/2010 20:34:01 |
| 11/10/2010 11:25:01 | 38.020 | 11/8/2010 18:29:01 | 27.237 | 12/7/2010 21:06:01 |
| 11/10/2010 11:45:01 | 38.456 | 11/8/2010 18:49:01 | 27.237 | 12/7/2010 21:38:01 |
| 11/10/2010 12:05:01 | 39.513 | 11/8/2010 19:09:01 | 27.237 | 12/7/2010 22:10:01 |
| 11/10/2010 12:25:01 | 39.949 | 11/8/2010 19:29:01 | 27.300 | 12/7/2010 22:42:01 |
| 11/10/2010 12:45:01 | 39.576 | 11/8/2010 19:49:01 | 27.300 | 12/7/2010 23:14:01 |
| 11/10/2010 13:05:01 | 39.824 | 11/8/2010 20:09:01 | 27.300 | 12/7/2010 23:46:01 |
| 11/10/2010 13:25:01 | 39.327 | 11/8/2010 20:29:01 | 27.300 | 12/8/2010 00:18:01 |
| 11/10/2010 13:45:01 | 39.576 | 11/8/2010 20:49:01 | 27.300 | 12/8/2010 00:50:01 |
| 11/10/2010 14:05:01 | 40.322 | 11/8/2010 21:09:01 | 27.362 | 12/8/2010 01:22:01 |
| 11/10/2010 14:25:01 | 39.762 | 11/8/2010 21:29:01 | 27.300 | 12/8/2010 01:54:01 |
| 11/10/2010 14:45:01 | 38.207 | 11/8/2010 21:49:01 | 27.362 | 12/8/2010 02:26:01 |
| 11/10/2010 15:05:01 | 37.771 | 11/8/2010 22:09:01 | 27.362 | 12/8/2010 02:58:01 |
| 11/10/2010 15:25:01 | 37.273 | 11/8/2010 22:29:01 | 27.362 | 12/8/2010 03:30:01 |
| 11/10/2010 15:45:01 | 36.962 | 11/8/2010 22:49:01 | 27.300 | 12/8/2010 04:02:01 |
| 11/10/2010 16:05:01 | 36.650 | 11/8/2010 23:09:01 | 27.362 | 12/8/2010 04:34:01 |
| 11/10/2010 16:25:01 | 36.276 | 11/8/2010 23:29:01 | 27.300 | 12/8/2010 05:06:01 |
| 11/10/2010 16:45:01 | 35.280 | 11/8/2010 23:49:01 | 27.300 | 12/8/2010 05:38:01 |
| 11/10/2010 17:05:01 | 34.408 | 11/9/2010 00:09:01 | 27.300 | 12/8/2010 06:10:01 |
| 11/10/2010 17:25:01 | 32.974 | 11/9/2010 00:29:01 | 27.300 | 12/8/2010 06:42:01 |
| 11/10/2010 17:45:01 | 31.852 | 11/9/2010 00:49:01 | 27.300 | 12/8/2010 07:14:01 |
| 11/10/2010 18:05:01 | 30.292 | 11/9/2010 01:09:01 | 27.300 | 12/8/2010 07:46:01 |
| 11/10/2010 18:25:01 | 28.794 | 11/9/2010 01:29:01 | 27.300 | 12/8/2010 08:18:01 |
| 11/10/2010 18:45:01 | 27.483 | 11/9/2010 01:49:01 | 27.300 | 12/8/2010 08:50:01 |
| 11/10/2010 19:05:01 | 26.671 | 11/9/2010 02:09:01 | 27.300 | 12/8/2010 09:22:01 |
| 11/10/2010 19:25:01 | 26.234 | 11/9/2010 02:29:01 | 27.237 | 12/8/2010 09:54:01 |
| 11/10/2010 19:45:01 | 25.859 | 11/9/2010 02:49:01 | 27.237 | 12/8/2010 10:26:01 |
| 11/10/2010 20:05:01 | 25.359 | 11/9/2010 03:09:01 | 27.237 | 12/8/2010 10:58:01 |
| 11/10/2010 20:25:01 | 24.859 | 11/9/2010 03:29:01 | 27.237 | 12/8/2010 11:30:01 |
| 11/10/2010 20:45:01 | 24.484 | 11/9/2010 03:49:01 | 27.175 | 12/8/2010 12:02:01 |
| 11/10/2010 21:05:01 | 24.047 | 11/9/2010 04:09:01 | 27.175 | 12/8/2010 12:34:01 |
| 11/10/2010 21:25:01 | 23.484 | 11/9/2010 04:29:01 | 27.175 | 12/8/2010 13:06:01 |
| 11/10/2010 21:45:01 | 22.921 | 11/9/2010 04:49:01 | 27.175 | 12/8/2010 13:38:01 |
| 11/10/2010 22:05:01 | 22.671 | 11/9/2010 05:09:01 | 27.112 | 12/8/2010 14:10:01 |
| 11/10/2010 22:25:01 | 22.359 | 11/9/2010 05:29:01 | 27.112 | 12/8/2010 14:42:01 |
| 11/10/2010 22:45:01 | 22.171 | 11/9/2010 05:49:01 | 27.112 | 12/8/2010 15:14:01 |
| 11/10/2010 23:05:01 | 21.796 | 11/9/2010 06:09:01 | 27.112 | 12/8/2010 15:46:01 |
| 11/10/2010 23:25:01 | 21.671 | 11/9/2010 06:29:01 | 27.050 | 12/8/2010 16:18:01 |
| 11/10/2010 23:45:01 | 21.608 | 11/9/2010 06:49:01 | 27.050 | 12/8/2010 16:50:01 |
| 11/11/2010 00:05:01 | 21.483 | 11/9/2010 07:09:01 | 27.050 | 12/8/2010 17:22:01 |
| 11/11/2010 00:25:01 | 21.107 | 11/9/2010 07:29:01 | 27.050 | 12/8/2010 17:54:01 |

|                     |        |                     |        |                    |
|---------------------|--------|---------------------|--------|--------------------|
| 11/11/2010 00:45:01 | 20.544 | 11/9/2010 07:49:01  | 26.987 | 12/8/2010 18:26:01 |
| 11/11/2010 01:05:01 | 20.106 | 11/9/2010 08:09:01  | 26.987 | 12/8/2010 18:58:01 |
| 11/11/2010 01:25:01 | 19.668 | 11/9/2010 08:29:01  | 26.987 | 12/8/2010 19:30:01 |
| 11/11/2010 01:45:01 | 19.230 | 11/9/2010 08:49:01  | 26.925 | 12/8/2010 20:02:01 |
| 11/11/2010 02:05:01 | 18.729 | 11/9/2010 09:09:01  | 26.925 | 12/8/2010 20:34:01 |
| 11/11/2010 02:25:01 | 18.040 | 11/9/2010 09:29:01  | 26.925 | 12/8/2010 21:06:01 |
| 11/11/2010 02:45:01 | 17.602 | 11/9/2010 09:49:01  | 26.925 | 12/8/2010 21:38:01 |
| 11/11/2010 03:05:01 | 17.226 | 11/9/2010 10:09:01  | 26.862 | 12/8/2010 22:10:01 |
| 11/11/2010 03:25:01 | 17.289 | 11/9/2010 10:29:01  | 26.862 | 12/8/2010 22:42:01 |
| 11/11/2010 03:45:01 | 17.539 | 11/9/2010 10:49:01  | 26.862 | 12/8/2010 23:14:01 |
| 11/11/2010 04:05:01 | 17.790 | 11/9/2010 11:09:01  | 26.862 | 12/8/2010 23:46:01 |
| 11/11/2010 04:25:01 | 17.414 | 11/9/2010 11:29:01  | 26.862 | 12/9/2010 00:18:01 |
| 11/11/2010 04:45:01 | 17.351 | 11/9/2010 11:49:01  | 26.862 | 12/9/2010 00:50:01 |
| 11/11/2010 05:05:01 | 17.351 | 11/9/2010 12:09:01  | 26.862 | 12/9/2010 01:22:01 |
| 11/11/2010 05:25:01 | 17.226 | 11/9/2010 12:29:01  | 26.862 | 12/9/2010 01:54:01 |
| 11/11/2010 05:45:01 | 17.477 | 11/9/2010 12:49:01  | 26.862 | 12/9/2010 02:26:01 |
| 11/11/2010 06:05:01 | 19.167 | 11/9/2010 13:09:01  | 26.862 | 12/9/2010 02:58:01 |
| 11/11/2010 06:25:01 | 21.545 | 11/9/2010 13:29:01  | 26.862 | 12/9/2010 03:30:01 |
| 11/11/2010 06:45:01 | 24.359 | 11/9/2010 13:49:01  | 26.925 | 12/9/2010 04:02:01 |
| 11/11/2010 07:05:01 | 26.422 | 11/9/2010 14:09:01  | 26.925 | 12/9/2010 04:34:01 |
| 11/11/2010 07:25:01 | 28.170 | 11/9/2010 14:29:01  | 26.925 | 12/9/2010 05:06:01 |
| 11/11/2010 07:45:01 | 29.294 | 11/9/2010 14:49:01  | 26.987 | 12/9/2010 05:38:01 |
| 11/11/2010 08:05:01 | 31.852 | 11/9/2010 15:09:01  | 26.987 | 12/9/2010 06:10:01 |
| 11/11/2010 08:25:01 | 31.914 | 11/9/2010 15:29:01  | 26.987 | 12/9/2010 06:42:01 |
| 11/11/2010 08:45:01 | 32.662 | 11/9/2010 15:49:01  | 27.050 | 12/9/2010 07:14:01 |
| 11/11/2010 09:05:01 | 33.348 | 11/9/2010 16:09:01  | 27.112 | 12/9/2010 07:46:01 |
| 11/11/2010 09:25:01 | 34.470 | 11/9/2010 16:29:01  | 27.112 | 12/9/2010 08:18:01 |
| 11/11/2010 09:45:01 | 36.152 | 11/9/2010 16:49:01  | 27.175 | 12/9/2010 08:50:01 |
| 11/11/2010 10:05:01 | 36.526 | 11/9/2010 17:09:01  | 27.175 | 12/9/2010 09:22:01 |
| 11/11/2010 10:25:01 | 36.775 | 11/9/2010 17:29:01  | 27.237 | 12/9/2010 09:54:01 |
| 11/11/2010 10:45:01 | 35.529 | 11/9/2010 17:49:01  | 27.237 | 12/9/2010 10:26:01 |
| 11/11/2010 11:05:01 | 37.397 | 11/9/2010 18:09:01  | 27.300 | 12/9/2010 10:58:01 |
| 11/11/2010 11:25:01 | 37.771 | 11/9/2010 18:29:01  | 27.300 | 12/9/2010 11:30:01 |
| 11/11/2010 11:45:01 | 38.642 | 11/9/2010 18:49:01  | 27.362 | 12/9/2010 12:02:01 |
| 11/11/2010 12:05:01 | 37.584 | 11/9/2010 19:09:01  | 27.362 | 12/9/2010 12:34:01 |
| 11/11/2010 12:25:01 | 38.393 | 11/9/2010 19:29:01  | 27.362 | 12/9/2010 13:06:01 |
| 11/11/2010 12:45:01 | 38.829 | 11/9/2010 19:49:01  | 27.362 | 12/9/2010 13:38:01 |
| 11/11/2010 13:05:01 | 38.767 | 11/9/2010 20:09:01  | 27.425 | 12/9/2010 14:10:01 |
| 11/11/2010 13:25:01 | 38.580 | 11/9/2010 20:29:01  | 27.425 | 12/9/2010 14:42:01 |
| 11/11/2010 13:45:01 | 39.513 | 11/9/2010 20:49:01  | 27.425 | 12/9/2010 15:14:01 |
| 11/11/2010 14:05:01 | 39.887 | 11/9/2010 21:09:01  | 27.425 | 12/9/2010 15:46:01 |
| 11/11/2010 14:25:01 | 39.140 | 11/9/2010 21:29:01  | 27.425 | 12/9/2010 16:18:01 |
| 11/11/2010 14:45:01 | 39.016 | 11/9/2010 21:49:01  | 27.425 | 12/9/2010 16:50:01 |
| 11/11/2010 15:05:01 | 37.833 | 11/9/2010 22:09:01  | 27.425 | 12/9/2010 17:22:01 |
| 11/11/2010 15:25:01 | 37.335 | 11/9/2010 22:29:01  | 27.425 | 12/9/2010 17:54:01 |
| 11/11/2010 15:45:01 | 36.962 | 11/9/2010 22:49:01  | 27.425 | 12/9/2010 18:26:01 |
| 11/11/2010 16:05:01 | 36.276 | 11/9/2010 23:09:01  | 27.425 | 12/9/2010 18:58:01 |
| 11/11/2010 16:25:01 | 35.778 | 11/9/2010 23:29:01  | 27.425 | 12/9/2010 19:30:01 |
| 11/11/2010 16:45:01 | 35.031 | 11/9/2010 23:49:01  | 27.425 | 12/9/2010 20:02:01 |
| 11/11/2010 17:05:01 | 34.221 | 11/10/2010 00:09:01 | 27.425 | 12/9/2010 20:34:01 |

|                     |        |                     |        |                     |
|---------------------|--------|---------------------|--------|---------------------|
| 11/11/2010 17:25:01 | 33.223 | 11/10/2010 00:29:01 | 27.425 | 12/9/2010 21:06:01  |
| 11/11/2010 17:45:01 | 32.288 | 11/10/2010 00:49:01 | 27.425 | 12/9/2010 21:38:01  |
| 11/11/2010 18:05:01 | 31.103 | 11/10/2010 01:09:01 | 27.425 | 12/9/2010 22:10:01  |
| 11/11/2010 18:25:01 | 29.606 | 11/10/2010 01:29:01 | 27.362 | 12/9/2010 22:42:01  |
| 11/11/2010 18:45:01 | 28.482 | 11/10/2010 01:49:01 | 27.362 | 12/9/2010 23:14:01  |
| 11/11/2010 19:05:01 | 28.982 | 11/10/2010 02:09:01 | 27.362 | 12/9/2010 23:46:01  |
| 11/11/2010 19:25:01 | 29.044 | 11/10/2010 02:29:01 | 27.362 | 12/10/2010 00:18:01 |
| 11/11/2010 19:45:01 | 28.732 | 11/10/2010 02:49:01 | 27.362 | 12/10/2010 00:50:01 |
| 11/11/2010 20:05:01 | 28.607 | 11/10/2010 03:09:01 | 27.300 | 12/10/2010 01:22:01 |
| 11/11/2010 20:25:01 | 28.295 | 11/10/2010 03:29:01 | 27.300 | 12/10/2010 01:54:01 |
| 11/11/2010 20:45:01 | 28.233 | 11/10/2010 03:49:01 | 27.300 | 12/10/2010 02:26:01 |
| 11/11/2010 21:05:01 | 27.858 | 11/10/2010 04:09:01 | 27.237 | 12/10/2010 02:58:01 |
| 11/11/2010 21:25:01 | 27.171 | 11/10/2010 04:29:01 | 27.237 | 12/10/2010 03:30:01 |
| 11/11/2010 21:45:01 | 26.671 | 11/10/2010 04:49:01 | 27.237 | 12/10/2010 04:02:01 |
| 11/11/2010 22:05:01 | 26.109 | 11/10/2010 05:09:01 | 27.237 | 12/10/2010 04:34:01 |
| 11/11/2010 22:25:01 | 25.422 | 11/10/2010 05:29:01 | 27.175 | 12/10/2010 05:06:01 |
| 11/11/2010 22:45:01 | 24.484 | 11/10/2010 05:49:01 | 27.175 | 12/10/2010 05:38:01 |
| 11/11/2010 23:05:01 | 24.109 | 11/10/2010 06:09:01 | 27.175 | 12/10/2010 06:10:01 |
| 11/11/2010 23:25:01 | 23.422 | 11/10/2010 06:29:01 | 27.112 | 12/10/2010 06:42:01 |
| 11/11/2010 23:45:01 | 22.671 | 11/10/2010 06:49:01 | 27.112 | 12/10/2010 07:14:01 |
| 11/12/2010 00:05:01 | 21.983 | 11/10/2010 07:09:01 | 27.050 | 12/10/2010 07:46:01 |
| 11/12/2010 00:25:01 | 21.358 | 11/10/2010 07:29:01 | 27.050 | 12/10/2010 08:18:01 |
| 11/12/2010 00:45:01 | 20.669 | 11/10/2010 07:49:01 | 27.050 | 12/10/2010 08:50:01 |
| 11/12/2010 01:05:01 | 20.044 | 11/10/2010 08:09:01 | 26.987 | 12/10/2010 09:22:01 |
| 11/12/2010 01:25:01 | 19.543 | 11/10/2010 08:29:01 | 26.987 | 12/10/2010 09:54:01 |
| 11/12/2010 01:45:01 | 19.167 | 11/10/2010 08:49:01 | 26.925 | 12/10/2010 10:26:01 |
| 11/12/2010 02:05:01 | 18.917 | 11/10/2010 09:09:01 | 26.925 | 12/10/2010 10:58:01 |
| 11/12/2010 02:25:01 | 18.479 | 11/10/2010 09:29:01 | 26.925 | 12/10/2010 11:30:01 |
| 11/12/2010 02:45:01 | 17.978 | 11/10/2010 09:49:01 | 26.862 | 12/10/2010 12:02:01 |
| 11/12/2010 03:05:01 | 17.602 | 11/10/2010 10:09:01 | 26.862 | 12/10/2010 12:34:01 |
| 11/12/2010 03:25:01 | 17.163 | 11/10/2010 10:29:01 | 26.862 | 12/10/2010 13:06:01 |
| 11/12/2010 03:45:01 | 16.850 | 11/10/2010 10:49:01 | 26.862 | 12/10/2010 13:38:01 |
| 11/12/2010 04:05:01 | 17.038 | 11/10/2010 11:09:01 | 26.800 | 12/10/2010 14:10:01 |
| 11/12/2010 04:25:01 | 17.351 | 11/10/2010 11:29:01 | 26.800 | 12/10/2010 14:42:01 |
| 11/12/2010 04:45:01 | 17.477 | 11/10/2010 11:49:01 | 26.800 | 12/10/2010 15:14:01 |
| 11/12/2010 05:05:01 | 17.289 | 11/10/2010 12:09:01 | 26.800 | 12/10/2010 15:46:01 |
| 11/12/2010 05:25:01 | 17.414 | 11/10/2010 12:29:01 | 26.862 | 12/10/2010 16:18:01 |
| 11/12/2010 05:45:01 | 17.852 | 11/10/2010 12:49:01 | 26.862 | 12/10/2010 16:50:01 |
| 11/12/2010 06:05:01 | 19.293 | 11/10/2010 13:09:01 | 26.862 | 12/10/2010 17:22:01 |
| 11/12/2010 06:25:01 | 21.045 | 11/10/2010 13:29:01 | 26.862 | 12/10/2010 17:54:01 |
| 11/12/2010 06:45:01 | 24.172 | 11/10/2010 13:49:01 | 26.862 | 12/10/2010 18:26:01 |
| 11/12/2010 07:05:01 | 26.359 | 11/10/2010 14:09:01 | 26.925 | 12/10/2010 18:58:01 |
| 11/12/2010 07:25:01 | 27.733 | 11/10/2010 14:29:01 | 26.925 | 12/10/2010 19:30:01 |
| 11/12/2010 07:45:01 | 28.794 | 11/10/2010 14:49:01 | 26.925 | 12/10/2010 20:02:01 |
| 11/12/2010 08:05:01 | 31.041 | 11/10/2010 15:09:01 | 26.987 | 12/10/2010 20:34:01 |
| 11/12/2010 08:25:01 | 31.789 | 11/10/2010 15:29:01 | 26.987 | 12/10/2010 21:06:01 |
| 11/12/2010 08:45:01 | 32.163 | 11/10/2010 15:49:01 | 27.050 | 12/10/2010 21:38:01 |
| 11/12/2010 09:05:01 | 32.600 | 11/10/2010 16:09:01 | 27.112 | 12/10/2010 22:10:01 |
| 11/12/2010 09:25:01 | 33.909 | 11/10/2010 16:29:01 | 27.112 | 12/10/2010 22:42:01 |
| 11/12/2010 09:45:01 | 36.152 | 11/10/2010 16:49:01 | 27.175 | 12/10/2010 23:14:01 |



|                     |        |                     |        |                     |
|---------------------|--------|---------------------|--------|---------------------|
| 11/12/2010 10:05:01 | 36.526 | 11/10/2010 17:09:01 | 27.175 | 12/10/2010 23:46:01 |
| 11/12/2010 10:25:01 | 36.899 | 11/10/2010 17:29:01 | 27.237 | 12/11/2010 00:18:01 |
| 11/12/2010 10:45:01 | 37.460 | 11/10/2010 17:49:01 | 27.237 | 12/11/2010 00:50:01 |
| 11/12/2010 11:05:01 | 38.020 | 11/10/2010 18:09:01 | 27.300 | 12/11/2010 01:22:01 |
| 11/12/2010 11:25:01 | 38.331 | 11/10/2010 18:29:01 | 27.300 | 12/11/2010 01:54:01 |
| 11/12/2010 11:45:01 | 39.078 | 11/10/2010 18:49:01 | 27.362 | 12/11/2010 02:26:01 |
| 11/12/2010 12:05:01 | 39.824 | 11/10/2010 19:09:01 | 27.362 | 12/11/2010 02:58:01 |
| 11/12/2010 12:25:01 | 39.887 | 11/10/2010 19:29:01 | 27.362 | 12/11/2010 03:30:01 |
| 11/12/2010 12:45:01 | 39.202 | 11/10/2010 19:49:01 | 27.362 | 12/11/2010 04:02:01 |
| 11/12/2010 13:05:01 | 39.265 | 11/10/2010 20:09:01 | 27.425 | 12/11/2010 04:34:01 |
| 11/12/2010 13:25:01 | 39.762 | 11/10/2010 20:29:01 | 27.425 | 12/11/2010 05:06:01 |
| 11/12/2010 13:45:01 | 39.389 | 11/10/2010 20:49:01 | 27.425 | 12/11/2010 05:38:01 |
| 11/12/2010 14:05:01 | 39.762 | 11/10/2010 21:09:01 | 27.425 | 12/11/2010 06:10:01 |
| 11/12/2010 14:25:01 | 39.949 | 11/10/2010 21:29:01 | 27.425 | 12/11/2010 06:42:01 |
| 11/12/2010 14:45:01 | 38.393 | 11/10/2010 21:49:01 | 27.425 | 12/11/2010 07:14:01 |
| 11/12/2010 15:05:01 | 37.584 | 11/10/2010 22:09:01 | 27.425 | 12/11/2010 07:46:01 |
| 11/12/2010 15:25:01 | 37.397 | 11/10/2010 22:29:01 | 27.425 | 12/11/2010 08:18:01 |
| 11/12/2010 15:45:01 | 36.899 | 11/10/2010 22:49:01 | 27.425 | 12/11/2010 08:50:01 |
| 11/12/2010 16:05:01 | 36.339 | 11/10/2010 23:09:01 | 27.425 | 12/11/2010 09:22:01 |
| 11/12/2010 16:25:01 | 35.903 | 11/10/2010 23:29:01 | 27.425 | 12/11/2010 09:54:01 |
| 11/12/2010 16:45:01 | 35.093 | 11/10/2010 23:49:01 | 27.425 | 12/11/2010 10:26:01 |
| 11/12/2010 17:05:01 | 34.034 | 11/11/2010 00:09:01 | 27.425 | 12/11/2010 10:58:01 |
| 11/12/2010 17:25:01 | 32.413 | 11/11/2010 00:29:01 | 27.362 | 12/11/2010 11:30:01 |
| 11/12/2010 17:45:01 | 31.103 | 11/11/2010 00:49:01 | 27.362 | 12/11/2010 12:02:01 |
| 11/12/2010 18:05:01 | 29.731 | 11/11/2010 01:09:01 | 27.362 | 12/11/2010 12:34:01 |
| 11/12/2010 18:25:01 | 28.233 | 11/11/2010 01:29:01 | 27.362 | 12/11/2010 13:06:01 |
| 11/12/2010 18:45:01 | 27.358 | 11/11/2010 01:49:01 | 27.300 | 12/11/2010 13:38:01 |
| 11/12/2010 19:05:01 | 27.358 | 11/11/2010 02:09:01 | 27.300 | 12/11/2010 14:10:01 |
| 11/12/2010 19:25:01 | 27.920 | 11/11/2010 02:29:01 | 27.300 | 12/11/2010 14:42:01 |
| 11/12/2010 19:45:01 | 28.045 | 11/11/2010 02:49:01 | 27.237 | 12/11/2010 15:14:01 |
| 11/12/2010 20:05:01 | 28.170 | 11/11/2010 03:09:01 | 27.237 | 12/11/2010 15:46:01 |
| 11/12/2010 20:25:01 | 28.108 | 11/11/2010 03:29:01 | 27.237 | 12/11/2010 16:18:01 |
| 11/12/2010 20:45:01 | 27.796 | 11/11/2010 03:49:01 | 27.175 | 12/11/2010 16:50:01 |
| 11/12/2010 21:05:01 | 26.984 | 11/11/2010 04:09:01 | 27.175 | 12/11/2010 17:22:01 |
| 11/12/2010 21:25:01 | 25.984 | 11/11/2010 04:29:01 | 27.175 | 12/11/2010 17:54:01 |
| 11/12/2010 21:45:01 | 25.172 | 11/11/2010 04:49:01 | 27.112 | 12/11/2010 18:26:01 |
| 11/12/2010 22:05:01 | 24.547 | 11/11/2010 05:09:01 | 27.112 | 12/11/2010 18:58:01 |
| 11/12/2010 22:25:01 | 23.797 | 11/11/2010 05:29:01 | 27.050 | 12/11/2010 19:30:01 |
| 11/12/2010 22:45:01 | 22.984 | 11/11/2010 05:49:01 | 27.050 | 12/11/2010 20:02:01 |
| 11/12/2010 23:05:01 | 22.421 | 11/11/2010 06:09:01 | 27.050 | 12/11/2010 20:34:01 |
| 11/12/2010 23:25:01 | 21.796 | 11/11/2010 06:29:01 | 26.987 | 12/11/2010 21:06:01 |
| 11/12/2010 23:45:01 | 21.295 | 11/11/2010 06:49:01 | 26.987 | 12/11/2010 21:38:01 |
| 11/13/2010 00:05:01 | 20.795 | 11/11/2010 07:09:01 | 26.925 | 12/11/2010 22:10:01 |
| 11/13/2010 00:25:01 | 20.294 | 11/11/2010 07:29:01 | 26.925 | 12/11/2010 22:42:01 |
| 11/13/2010 00:45:01 | 19.793 | 11/11/2010 07:49:01 | 26.862 | 12/11/2010 23:14:01 |
| 11/13/2010 01:05:01 | 19.167 | 11/11/2010 08:09:01 | 26.862 | 12/11/2010 23:46:01 |
| 11/13/2010 01:25:01 | 18.729 | 11/11/2010 08:29:01 | 26.862 | 12/12/2010 00:18:01 |
| 11/13/2010 01:45:01 | 18.228 | 11/11/2010 08:49:01 | 26.800 | 12/12/2010 00:50:01 |
| 11/13/2010 02:05:01 | 17.978 | 11/11/2010 09:09:01 | 26.800 | 12/12/2010 01:22:01 |
| 11/13/2010 02:25:01 | 17.539 | 11/11/2010 09:29:01 | 26.738 | 12/12/2010 01:54:01 |

|                     |        |                     |        |                     |
|---------------------|--------|---------------------|--------|---------------------|
| 11/13/2010 02:45:01 | 17.163 | 11/11/2010 09:49:01 | 26.738 | 12/12/2010 02:26:01 |
| 11/13/2010 03:05:01 | 16.850 | 11/11/2010 10:09:01 | 26.738 | 12/12/2010 02:58:01 |
| 11/13/2010 03:25:01 | 16.599 | 11/11/2010 10:29:01 | 26.738 | 12/12/2010 03:30:01 |
| 11/13/2010 03:45:01 | 16.412 | 11/11/2010 10:49:01 | 26.675 | 12/12/2010 04:02:01 |
| 11/13/2010 04:05:01 | 16.036 | 11/11/2010 11:09:01 | 26.675 | 12/12/2010 04:34:01 |
| 11/13/2010 04:25:01 | 15.848 | 11/11/2010 11:29:01 | 26.675 | 12/12/2010 05:06:01 |
| 11/13/2010 04:45:01 | 15.597 | 11/11/2010 11:49:01 | 26.675 | 12/12/2010 05:38:01 |
| 11/13/2010 05:05:01 | 15.409 | 11/11/2010 12:09:01 | 26.675 | 12/12/2010 06:10:01 |
| 11/13/2010 05:25:01 | 15.472 | 11/11/2010 12:29:01 | 26.675 | 12/12/2010 06:42:01 |
| 11/13/2010 05:45:01 | 15.534 | 11/11/2010 12:49:01 | 26.675 | 12/12/2010 07:14:01 |
| 11/13/2010 06:05:01 | 16.161 | 11/11/2010 13:09:01 | 26.675 | 12/12/2010 07:46:01 |
| 11/13/2010 06:25:01 | 17.163 | 11/11/2010 13:29:01 | 26.738 | 12/12/2010 08:18:01 |
| 11/13/2010 06:45:01 | 19.793 | 11/11/2010 13:49:01 | 26.738 | 12/12/2010 08:50:01 |
| 11/13/2010 07:05:01 | 23.359 | 11/11/2010 14:09:01 | 26.738 | 12/12/2010 09:22:01 |
| 11/13/2010 07:25:01 | 26.734 | 11/11/2010 14:29:01 | 26.800 | 12/12/2010 09:54:01 |
| 11/13/2010 07:45:01 | 28.607 | 11/11/2010 14:49:01 | 26.800 | 12/12/2010 10:26:01 |
| 11/13/2010 08:05:01 | 30.292 | 11/11/2010 15:09:01 | 26.862 | 12/12/2010 10:58:01 |
| 11/13/2010 08:25:01 | 31.727 | 11/11/2010 15:29:01 | 26.862 | 12/12/2010 11:30:01 |
| 11/13/2010 08:45:01 | 32.101 | 11/11/2010 15:49:01 | 26.925 | 12/12/2010 12:02:01 |
| 11/13/2010 09:05:01 | 33.286 | 11/11/2010 16:09:01 | 26.925 | 12/12/2010 12:34:01 |
| 11/13/2010 09:25:01 | 33.784 | 11/11/2010 16:29:01 | 26.987 | 12/12/2010 13:06:01 |
| 11/13/2010 09:45:01 | 33.036 | 11/11/2010 16:49:01 | 26.987 | 12/12/2010 13:38:01 |
| 11/13/2010 10:05:01 | 36.152 | 11/11/2010 17:09:01 | 27.050 | 12/12/2010 14:10:01 |
| 11/13/2010 10:25:01 | 36.712 | 11/11/2010 17:29:01 | 27.050 | 12/12/2010 14:42:01 |
| 11/13/2010 10:45:01 | 37.895 | 11/11/2010 17:49:01 | 27.112 | 12/12/2010 15:14:01 |
| 11/13/2010 11:05:01 | 37.646 | 11/11/2010 18:09:01 | 27.112 | 12/12/2010 15:46:01 |
| 11/13/2010 11:25:01 | 38.393 | 11/11/2010 18:29:01 | 27.175 | 12/12/2010 16:18:01 |
| 11/13/2010 11:45:01 | 39.451 | 11/11/2010 18:49:01 | 27.175 | 12/12/2010 16:50:01 |
| 11/13/2010 12:05:01 | 40.136 | 11/11/2010 19:09:01 | 27.237 | 12/12/2010 17:22:01 |
| 11/13/2010 12:25:01 | 40.882 | 11/11/2010 19:29:01 | 27.237 | 12/12/2010 17:54:01 |
| 11/13/2010 12:45:01 | 39.327 | 11/11/2010 19:49:01 | 27.237 | 12/12/2010 18:26:01 |
| 11/13/2010 13:05:01 | 39.265 | 11/11/2010 20:09:01 | 27.237 | 12/12/2010 18:58:01 |
| 11/13/2010 13:25:01 | 37.646 | 11/11/2010 20:29:01 | 27.300 | 12/12/2010 19:30:01 |
| 11/13/2010 13:45:01 | 38.953 | 11/11/2010 20:49:01 | 27.300 | 12/12/2010 20:02:01 |
| 11/13/2010 14:05:01 | 39.265 | 11/11/2010 21:09:01 | 27.300 | 12/12/2010 20:34:01 |
| 11/13/2010 14:25:01 | 39.327 | 11/11/2010 21:29:01 | 27.300 | 12/12/2010 21:06:01 |
| 11/13/2010 14:45:01 | 37.958 | 11/11/2010 21:49:01 | 27.300 | 12/12/2010 21:38:01 |
| 11/13/2010 15:05:01 | 36.899 | 11/11/2010 22:09:01 | 27.300 | 12/12/2010 22:10:01 |
| 11/13/2010 15:25:01 | 36.899 | 11/11/2010 22:29:01 | 27.300 | 12/12/2010 22:42:01 |
| 11/13/2010 15:45:01 | 35.654 | 11/11/2010 22:49:01 | 27.300 | 12/12/2010 23:14:01 |
| 11/13/2010 16:05:01 | 35.031 | 11/11/2010 23:09:01 | 27.300 | 12/12/2010 23:46:01 |
| 11/13/2010 16:25:01 | 34.719 | 11/11/2010 23:29:01 | 27.300 | 12/13/2010 00:18:01 |
| 11/13/2010 16:45:01 | 34.034 | 11/11/2010 23:49:01 | 27.300 | 12/13/2010 00:50:01 |
| 11/13/2010 17:05:01 | 33.223 | 11/12/2010 00:09:01 | 27.300 | 12/13/2010 01:22:01 |
| 11/13/2010 17:25:01 | 32.288 | 11/12/2010 00:29:01 | 27.300 | 12/13/2010 01:54:01 |
| 11/13/2010 17:45:01 | 30.729 | 11/12/2010 00:49:01 | 27.300 | 12/13/2010 02:26:01 |
| 11/13/2010 18:05:01 | 29.231 | 11/12/2010 01:09:01 | 27.237 | 12/13/2010 02:58:01 |
| 11/13/2010 18:25:01 | 27.733 | 11/12/2010 01:29:01 | 27.237 | 12/13/2010 03:30:01 |
| 11/13/2010 18:45:01 | 26.546 | 11/12/2010 01:49:01 | 27.237 | 12/13/2010 04:02:01 |
| 11/13/2010 19:05:01 | 25.797 | 11/12/2010 02:09:01 | 27.237 | 12/13/2010 04:34:01 |

|                     |        |                     |        |                     |
|---------------------|--------|---------------------|--------|---------------------|
| 11/13/2010 19:25:01 | 25.109 | 11/12/2010 02:29:01 | 27.237 | 12/13/2010 05:06:01 |
| 11/13/2010 19:45:01 | 24.609 | 11/12/2010 02:49:01 | 27.175 | 12/13/2010 05:38:01 |
| 11/13/2010 20:05:01 | 24.234 | 11/12/2010 03:09:01 | 27.175 | 12/13/2010 06:10:01 |
| 11/13/2010 20:25:01 | 24.484 | 11/12/2010 03:29:01 | 27.175 | 12/13/2010 06:42:01 |
| 11/13/2010 20:45:01 | 24.984 | 11/12/2010 03:49:01 | 27.175 | 12/13/2010 07:14:01 |
| 11/13/2010 21:05:01 | 25.172 | 11/12/2010 04:09:01 | 27.112 | 12/13/2010 07:46:01 |
| 11/13/2010 21:25:01 | 24.922 | 11/12/2010 04:29:01 | 27.112 | 12/13/2010 08:18:01 |
| 11/13/2010 21:45:01 | 24.422 | 11/12/2010 04:49:01 | 27.112 | 12/13/2010 08:50:01 |
| 11/13/2010 22:05:01 | 23.922 | 11/12/2010 05:09:01 | 27.050 | 12/13/2010 09:22:01 |
| 11/13/2010 22:25:01 | 23.609 | 11/12/2010 05:29:01 | 27.050 | 12/13/2010 09:54:01 |
| 11/13/2010 22:45:01 | 23.234 | 11/12/2010 05:49:01 | 27.050 | 12/13/2010 10:26:01 |
| 11/13/2010 23:05:01 | 22.796 | 11/12/2010 06:09:01 | 26.987 | 12/13/2010 10:58:01 |
| 11/13/2010 23:25:01 | 22.359 | 11/12/2010 06:29:01 | 26.987 | 12/13/2010 11:30:01 |
| 11/13/2010 23:45:01 | 21.983 | 11/12/2010 06:49:01 | 26.987 | 12/13/2010 12:02:01 |
| 11/14/2010 00:05:01 | 21.483 | 11/12/2010 07:09:01 | 26.925 | 12/13/2010 12:34:01 |
| 11/14/2010 00:25:01 | 21.045 | 11/12/2010 07:29:01 | 26.925 | 12/13/2010 13:06:01 |
| 11/14/2010 00:45:01 | 20.419 | 11/12/2010 07:49:01 | 26.862 | 12/13/2010 13:38:01 |
| 11/14/2010 01:05:01 | 20.044 | 11/12/2010 08:09:01 | 26.862 | 12/13/2010 14:10:01 |
| 11/14/2010 01:25:01 | 19.355 | 11/12/2010 08:29:01 | 26.862 | 12/13/2010 14:42:01 |
| 11/14/2010 01:45:01 | 18.979 | 11/12/2010 08:49:01 | 26.800 | 12/13/2010 15:14:01 |
| 11/14/2010 02:05:01 | 18.291 | 11/12/2010 09:09:01 | 26.800 | 12/13/2010 15:46:01 |
| 11/14/2010 02:25:01 | 17.852 | 11/12/2010 09:29:01 | 26.738 | 12/13/2010 16:18:01 |
| 11/14/2010 02:45:01 | 17.477 | 11/12/2010 09:49:01 | 26.738 | 12/13/2010 16:50:01 |
| 11/14/2010 03:05:01 | 17.163 | 11/12/2010 10:09:01 | 26.738 | 12/13/2010 17:22:01 |
| 11/14/2010 03:25:01 | 16.787 | 11/12/2010 10:29:01 | 26.738 | 12/13/2010 17:54:01 |
| 11/14/2010 03:45:01 | 16.474 | 11/12/2010 10:49:01 | 26.675 | 12/13/2010 18:26:01 |
| 11/14/2010 04:05:01 | 16.224 | 11/12/2010 11:09:01 | 26.675 | 12/13/2010 18:58:01 |
| 11/14/2010 04:25:01 | 15.910 | 11/12/2010 11:29:01 | 26.675 | 12/13/2010 19:30:01 |
| 11/14/2010 04:45:01 | 15.597 | 11/12/2010 11:49:01 | 26.675 | 12/13/2010 20:02:01 |
| 11/14/2010 05:05:01 | 15.283 | 11/12/2010 12:09:01 | 26.675 | 12/13/2010 20:34:01 |
| 11/14/2010 05:25:01 | 15.221 | 11/12/2010 12:29:01 | 26.675 | 12/13/2010 21:06:01 |
| 11/14/2010 05:45:01 | 15.409 | 11/12/2010 12:49:01 | 26.675 | 12/13/2010 21:38:01 |
| 11/14/2010 06:05:01 | 16.286 | 11/12/2010 13:09:01 | 26.738 | 12/13/2010 22:10:01 |
| 11/14/2010 06:25:01 | 18.416 | 11/12/2010 13:29:01 | 26.738 | 12/13/2010 22:42:01 |
| 11/14/2010 06:45:01 | 22.046 | 11/12/2010 13:49:01 | 26.738 | 12/13/2010 23:14:01 |
| 11/14/2010 07:05:01 | 25.547 | 11/12/2010 14:09:01 | 26.800 | 12/13/2010 23:46:01 |
| 11/14/2010 07:25:01 | 27.671 | 11/12/2010 14:29:01 | 26.800 | 12/14/2010 00:18:01 |
| 11/14/2010 07:45:01 | 28.982 | 11/12/2010 14:49:01 | 26.800 | 12/14/2010 00:50:01 |
| 11/14/2010 08:05:01 | 30.916 | 11/12/2010 15:09:01 | 26.862 | 12/14/2010 01:22:01 |
| 11/14/2010 08:25:01 | 31.914 | 11/12/2010 15:29:01 | 26.925 | 12/14/2010 01:54:01 |
| 11/14/2010 08:45:01 | 32.226 | 11/12/2010 15:49:01 | 26.925 | 12/14/2010 02:26:01 |
| 11/14/2010 09:05:01 | 32.163 | 11/12/2010 16:09:01 | 26.987 | 12/14/2010 02:58:01 |
| 11/14/2010 09:25:01 | 34.408 | 11/12/2010 16:29:01 | 26.987 | 12/14/2010 03:30:01 |
| 11/14/2010 09:45:01 | 36.401 | 11/12/2010 16:49:01 | 27.050 | 12/14/2010 04:02:01 |
| 11/14/2010 10:05:01 | 37.584 | 11/12/2010 17:09:01 | 27.112 | 12/14/2010 04:34:01 |
| 11/14/2010 10:25:01 | 37.584 | 11/12/2010 17:29:01 | 27.112 | 12/14/2010 05:06:01 |
| 11/14/2010 10:45:01 | 38.020 | 11/12/2010 17:49:01 | 27.175 | 12/14/2010 05:38:01 |
| 11/14/2010 11:05:01 | 38.269 | 11/12/2010 18:09:01 | 27.175 | 12/14/2010 06:10:01 |
| 11/14/2010 11:25:01 | 38.891 | 11/12/2010 18:29:01 | 27.237 | 12/14/2010 06:42:01 |
| 11/14/2010 11:45:01 | 39.202 | 11/12/2010 18:49:01 | 27.237 | 12/14/2010 07:14:01 |

|                     |        |                     |        |                     |
|---------------------|--------|---------------------|--------|---------------------|
| 11/14/2010 12:05:01 | 40.820 | 11/12/2010 19:09:01 | 27.300 | 12/14/2010 07:46:01 |
| 11/14/2010 12:25:01 | 40.260 | 11/12/2010 19:29:01 | 27.300 | 12/14/2010 08:18:01 |
| 11/14/2010 12:45:01 | 40.509 | 11/12/2010 19:49:01 | 27.300 | 12/14/2010 08:50:01 |
| 11/14/2010 13:05:01 | 41.317 | 11/12/2010 20:09:01 | 27.300 | 12/14/2010 09:22:01 |
| 11/14/2010 13:25:01 | 41.379 | 11/12/2010 20:29:01 | 27.362 | 12/14/2010 09:54:01 |
| 11/14/2010 13:45:01 | 39.389 | 11/12/2010 20:49:01 | 27.362 | 12/14/2010 10:26:01 |
| 11/14/2010 14:05:01 | 39.949 | 11/12/2010 21:09:01 | 27.362 | 12/14/2010 10:58:01 |
| 11/14/2010 14:25:01 | 41.068 | 11/12/2010 21:29:01 | 27.362 | 12/14/2010 11:30:01 |
| 11/14/2010 14:45:01 | 37.024 | 11/12/2010 21:49:01 | 27.362 | 12/14/2010 12:02:01 |
| 11/14/2010 15:05:01 | 38.580 | 11/12/2010 22:09:01 | 27.362 | 12/14/2010 12:34:01 |
| 11/14/2010 15:25:01 | 37.895 | 11/12/2010 22:29:01 | 27.362 | 12/14/2010 13:06:01 |
| 11/14/2010 15:45:01 | 36.463 | 11/12/2010 22:49:01 | 27.362 | 12/14/2010 13:38:01 |
| 11/14/2010 16:05:01 | 35.529 | 11/12/2010 23:09:01 | 27.362 | 12/14/2010 14:10:01 |
| 11/14/2010 16:25:01 | 35.654 | 11/12/2010 23:29:01 | 27.362 | 12/14/2010 14:42:01 |
| 11/14/2010 16:45:01 | 35.342 | 11/12/2010 23:49:01 | 27.362 | 12/14/2010 15:14:01 |
| 11/14/2010 17:05:01 | 34.595 | 11/13/2010 00:09:01 | 27.362 | 12/14/2010 15:46:01 |
| 11/14/2010 17:25:01 | 33.473 | 11/13/2010 00:29:01 | 27.362 | 12/14/2010 16:18:01 |
| 11/14/2010 17:45:01 | 32.351 | 11/13/2010 00:49:01 | 27.300 | 12/14/2010 16:50:01 |
| 11/14/2010 18:05:01 | 31.041 | 11/13/2010 01:09:01 | 27.300 | 12/14/2010 17:22:01 |
| 11/14/2010 18:25:01 | 30.230 | 11/13/2010 01:29:01 | 27.300 | 12/14/2010 17:54:01 |
| 11/14/2010 18:45:01 | 30.043 | 11/13/2010 01:49:01 | 27.300 | 12/14/2010 18:26:01 |
| 11/14/2010 19:05:01 | 29.980 | 11/13/2010 02:09:01 | 27.300 | 12/14/2010 18:58:01 |
| 11/14/2010 19:25:01 | 29.481 | 11/13/2010 02:29:01 | 27.237 | 12/14/2010 19:30:01 |
| 11/14/2010 19:45:01 | 29.419 | 11/13/2010 02:49:01 | 27.237 | 12/14/2010 20:02:01 |
| 11/14/2010 20:05:01 | 29.044 | 11/13/2010 03:09:01 | 27.237 | 12/14/2010 20:34:01 |
| 11/14/2010 20:25:01 | 28.607 | 11/13/2010 03:29:01 | 27.175 | 12/14/2010 21:06:01 |
| 11/14/2010 20:45:01 | 28.108 | 11/13/2010 03:49:01 | 27.175 | 12/14/2010 21:38:01 |
| 11/14/2010 21:05:01 | 27.983 | 11/13/2010 04:09:01 | 27.175 | 12/14/2010 22:10:01 |
| 11/14/2010 21:25:01 | 27.858 | 11/13/2010 04:29:01 | 27.175 | 12/14/2010 22:42:01 |
| 11/14/2010 21:45:01 | 27.546 | 11/13/2010 04:49:01 | 27.112 | 12/14/2010 23:14:01 |
| 11/14/2010 22:05:01 | 26.984 | 11/13/2010 05:09:01 | 27.112 | 12/14/2010 23:46:01 |
| 11/14/2010 22:25:01 | 26.172 | 11/13/2010 05:29:01 | 27.050 | 12/15/2010 00:18:01 |
| 11/14/2010 22:45:01 | 25.422 | 11/13/2010 05:49:01 | 27.050 | 12/15/2010 00:50:01 |
| 11/14/2010 23:05:01 | 25.047 | 11/13/2010 06:09:01 | 27.050 | 12/15/2010 01:22:01 |
| 11/14/2010 23:25:01 | 24.422 | 11/13/2010 06:29:01 | 26.987 | 12/15/2010 01:54:01 |
| 11/14/2010 23:45:01 | 24.672 | 11/13/2010 06:49:01 | 26.987 | 12/15/2010 02:26:01 |
| 11/15/2010 00:05:01 | 25.047 | 11/13/2010 07:09:01 | 26.925 | 12/15/2010 02:58:01 |
| 11/15/2010 00:25:01 | 24.859 | 11/13/2010 07:29:01 | 26.925 | 12/15/2010 03:30:01 |
| 11/15/2010 00:45:01 | 24.547 | 11/13/2010 07:49:01 | 26.925 | 12/15/2010 04:02:01 |
| 11/15/2010 01:05:01 | 24.172 | 11/13/2010 08:09:01 | 26.862 | 12/15/2010 04:34:01 |
| 11/15/2010 01:25:01 | 23.609 | 11/13/2010 08:29:01 | 26.862 | 12/15/2010 05:06:01 |
| 11/15/2010 01:45:01 | 23.172 | 11/13/2010 08:49:01 | 26.800 | 12/15/2010 05:38:01 |
| 11/15/2010 02:05:01 | 22.796 | 11/13/2010 09:09:01 | 26.800 | 12/15/2010 06:10:01 |
| 11/15/2010 02:25:01 | 22.234 | 11/13/2010 09:29:01 | 26.738 | 12/15/2010 06:42:01 |
| 11/15/2010 02:45:01 | 21.733 | 11/13/2010 09:49:01 | 26.738 | 12/15/2010 07:14:01 |
| 11/15/2010 03:05:01 | 21.170 | 11/13/2010 10:09:01 | 26.675 | 12/15/2010 07:46:01 |
| 11/15/2010 03:25:01 | 20.669 | 11/13/2010 10:29:01 | 26.675 | 12/15/2010 08:18:01 |
| 11/15/2010 03:45:01 | 20.357 | 11/13/2010 10:49:01 | 26.675 | 12/15/2010 08:50:01 |
| 11/15/2010 04:05:01 | 20.044 | 11/13/2010 11:09:01 | 26.675 | 12/15/2010 09:22:01 |
| 11/15/2010 04:25:01 | 19.918 | 11/13/2010 11:29:01 | 26.675 | 12/15/2010 09:54:01 |

|                     |        |                     |        |                     |
|---------------------|--------|---------------------|--------|---------------------|
| 11/15/2010 04:45:01 | 19.793 | 11/13/2010 11:49:01 | 26.613 | 12/15/2010 10:26:01 |
| 11/15/2010 05:05:01 | 19.418 | 11/13/2010 12:09:01 | 26.613 | 12/15/2010 10:58:01 |
| 11/15/2010 05:25:01 | 19.105 | 11/13/2010 12:29:01 | 26.613 | 12/15/2010 11:30:01 |
| 11/15/2010 05:45:01 | 19.105 | 11/13/2010 12:49:01 | 26.675 | 12/15/2010 12:02:01 |
| 11/15/2010 06:05:01 | 19.731 | 11/13/2010 13:09:01 | 26.675 | 12/15/2010 12:34:01 |
| 11/15/2010 06:25:01 | 21.107 | 11/13/2010 13:29:01 | 26.675 | 12/15/2010 13:06:01 |
| 11/15/2010 06:45:01 | 23.359 | 11/13/2010 13:49:01 | 26.675 | 12/15/2010 13:38:01 |
| 11/15/2010 07:05:01 | 26.297 | 11/13/2010 14:09:01 | 26.738 | 12/15/2010 14:10:01 |
| 11/15/2010 07:25:01 | 28.045 | 11/13/2010 14:29:01 | 26.738 | 12/15/2010 14:42:01 |
| 11/15/2010 07:45:01 | 29.294 | 11/13/2010 14:49:01 | 26.800 | 12/15/2010 15:14:01 |
| 11/15/2010 08:05:01 | 31.228 | 11/13/2010 15:09:01 | 26.800 | 12/15/2010 15:46:01 |
| 11/15/2010 08:25:01 | 32.475 | 11/13/2010 15:29:01 | 26.800 | 12/15/2010 16:18:01 |
| 11/15/2010 08:45:01 | 33.348 | 11/13/2010 15:49:01 | 26.862 | 12/15/2010 16:50:01 |
| 11/15/2010 09:05:01 | 34.345 | 11/13/2010 16:09:01 | 26.925 | 12/15/2010 17:22:01 |
| 11/15/2010 09:25:01 | 35.093 | 11/13/2010 16:29:01 | 26.925 | 12/15/2010 17:54:01 |
| 11/15/2010 09:45:01 | 35.529 | 11/13/2010 16:49:01 | 26.987 | 12/15/2010 18:26:01 |
| 11/15/2010 10:05:01 | 34.470 | 11/13/2010 17:09:01 | 26.987 | 12/15/2010 18:58:01 |
| 11/15/2010 10:25:01 | 34.781 | 11/13/2010 17:29:01 | 27.050 | 12/15/2010 19:30:01 |
| 11/15/2010 10:45:01 | 37.024 | 11/13/2010 17:49:01 | 27.050 | 12/15/2010 20:02:01 |
| 11/15/2010 11:05:01 | 36.775 | 11/13/2010 18:09:01 | 27.112 | 12/15/2010 20:34:01 |
| 11/15/2010 11:25:01 | 37.771 | 11/13/2010 18:29:01 | 27.112 | 12/15/2010 21:06:01 |
| 11/15/2010 11:45:01 | 38.704 | 11/13/2010 18:49:01 | 27.175 | 12/15/2010 21:38:01 |
| 11/15/2010 12:05:01 | 40.011 | 11/13/2010 19:09:01 | 27.175 | 12/15/2010 22:10:01 |
| 11/15/2010 12:25:01 | 40.136 | 11/13/2010 19:29:01 | 27.175 | 12/15/2010 22:42:01 |
| 11/15/2010 12:45:01 | 39.576 | 11/13/2010 19:49:01 | 27.237 | 12/15/2010 23:14:01 |
| 11/15/2010 13:05:01 | 39.513 | 11/13/2010 20:09:01 | 27.237 | 12/15/2010 23:46:01 |
| 11/15/2010 13:25:01 | 40.882 | 11/13/2010 20:29:01 | 27.237 | 12/16/2010 00:18:01 |
| 11/15/2010 13:45:01 | 40.260 | 11/13/2010 20:49:01 | 27.237 | 12/16/2010 00:50:01 |
| 11/15/2010 14:05:01 | 39.887 | 11/13/2010 21:09:01 | 27.237 | 12/16/2010 01:22:01 |
| 11/15/2010 14:25:01 | 39.389 | 11/13/2010 21:29:01 | 27.237 | 12/16/2010 01:54:01 |
| 11/15/2010 14:45:01 | 38.767 | 11/13/2010 21:49:01 | 27.237 | 12/16/2010 02:26:01 |
| 11/15/2010 15:05:01 | 36.837 | 11/13/2010 22:09:01 | 27.237 | 12/16/2010 02:58:01 |
| 11/15/2010 15:25:01 | 37.024 | 11/13/2010 22:29:01 | 27.237 | 12/16/2010 03:30:01 |
| 11/15/2010 15:45:01 | 37.086 | 11/13/2010 22:49:01 | 27.237 | 12/16/2010 04:02:01 |
| 11/15/2010 16:05:01 | 36.027 | 11/13/2010 23:09:01 | 27.237 | 12/16/2010 04:34:01 |
| 11/15/2010 16:25:01 | 35.093 | 11/13/2010 23:29:01 | 27.237 | 12/16/2010 05:06:01 |
| 11/15/2010 16:45:01 | 34.844 | 11/13/2010 23:49:01 | 27.237 | 12/16/2010 05:38:01 |
| 11/15/2010 17:05:01 | 33.660 | 11/14/2010 00:09:01 | 27.237 | 12/16/2010 06:10:01 |
| 11/15/2010 17:25:01 | 32.039 | 11/14/2010 00:29:01 | 27.175 | 12/16/2010 06:42:01 |
| 11/15/2010 17:45:01 | 30.417 | 11/14/2010 00:49:01 | 27.175 | 12/16/2010 07:14:01 |
| 11/15/2010 18:05:01 | 28.732 | 11/14/2010 01:09:01 | 27.175 | 12/16/2010 07:46:01 |
| 11/15/2010 18:25:01 | 27.296 | 11/14/2010 01:29:01 | 27.175 | 12/16/2010 08:18:01 |
| 11/15/2010 18:45:01 | 26.047 | 11/14/2010 01:49:01 | 27.175 | 12/16/2010 08:50:01 |
| 11/15/2010 19:05:01 | 25.047 | 11/14/2010 02:09:01 | 27.112 | 12/16/2010 09:22:01 |
| 11/15/2010 19:25:01 | 24.109 | 11/14/2010 02:29:01 | 27.112 | 12/16/2010 09:54:01 |
| 11/15/2010 19:45:01 | 23.422 | 11/14/2010 02:49:01 | 27.112 | 12/16/2010 10:26:01 |
| 11/15/2010 20:05:01 | 23.109 | 11/14/2010 03:09:01 | 27.050 | 12/16/2010 10:58:01 |
| 11/15/2010 20:25:01 | 23.172 | 11/14/2010 03:29:01 | 27.050 | 12/16/2010 11:30:01 |
| 11/15/2010 20:45:01 | 25.984 | 11/14/2010 03:49:01 | 27.050 | 12/16/2010 12:02:01 |
| 11/15/2010 21:05:01 | 25.922 | 11/14/2010 04:09:01 | 26.987 | 12/16/2010 12:34:01 |

|                     |        |                     |        |                     |
|---------------------|--------|---------------------|--------|---------------------|
| 11/15/2010 21:25:01 | 25.297 | 11/14/2010 04:29:01 | 26.987 | 12/16/2010 13:06:01 |
| 11/15/2010 21:45:01 | 24.609 | 11/14/2010 04:49:01 | 26.987 | 12/16/2010 13:38:01 |
| 11/15/2010 22:05:01 | 23.984 | 11/14/2010 05:09:01 | 26.987 | 12/16/2010 14:10:01 |
| 11/15/2010 22:25:01 | 23.359 | 11/14/2010 05:29:01 | 26.925 | 12/16/2010 14:42:01 |
| 11/15/2010 22:45:01 | 23.047 | 11/14/2010 05:49:01 | 26.925 | 12/16/2010 15:14:01 |
| 11/15/2010 23:05:01 | 22.859 | 11/14/2010 06:09:01 | 26.862 | 12/16/2010 15:46:01 |
| 11/15/2010 23:25:01 | 22.859 | 11/14/2010 06:29:01 | 26.862 | 12/16/2010 16:18:01 |
| 11/15/2010 23:45:01 | 23.109 | 11/14/2010 06:49:01 | 26.862 | 12/16/2010 16:50:01 |
| 11/16/2010 00:05:01 | 23.109 | 11/14/2010 07:09:01 | 26.800 | 12/16/2010 17:22:01 |
| 11/16/2010 00:25:01 | 22.796 | 11/14/2010 07:29:01 | 26.800 | 12/16/2010 17:54:01 |
| 11/16/2010 00:45:01 | 22.671 | 11/14/2010 07:49:01 | 26.738 | 12/16/2010 18:26:01 |
| 11/16/2010 01:05:01 | 22.546 | 11/14/2010 08:09:01 | 26.738 | 12/16/2010 18:58:01 |
| 11/16/2010 01:25:01 | 22.296 | 11/14/2010 08:29:01 | 26.675 | 12/16/2010 19:30:01 |
| 11/16/2010 01:45:01 | 21.921 | 11/14/2010 08:49:01 | 26.675 | 12/16/2010 20:02:01 |
| 11/16/2010 02:05:01 | 21.608 | 11/14/2010 09:09:01 | 26.675 | 12/16/2010 20:34:01 |
| 11/16/2010 02:25:01 | 21.483 | 11/14/2010 09:29:01 | 26.613 | 12/16/2010 21:06:01 |
| 11/16/2010 02:45:01 | 21.170 | 11/14/2010 09:49:01 | 26.613 | 12/16/2010 21:38:01 |
| 11/16/2010 03:05:01 | 20.732 | 11/14/2010 10:09:01 | 26.613 | 12/16/2010 22:10:01 |
| 11/16/2010 03:25:01 | 20.544 | 11/14/2010 10:29:01 | 26.550 | 12/16/2010 22:42:01 |
| 11/16/2010 03:45:01 | 20.607 | 11/14/2010 10:49:01 | 26.550 | 12/16/2010 23:14:01 |
| 11/16/2010 04:05:01 | 20.169 | 11/14/2010 11:09:01 | 26.550 | 12/16/2010 23:46:01 |
| 11/16/2010 04:25:01 | 19.918 | 11/14/2010 11:29:01 | 26.550 | 12/17/2010 00:18:01 |
| 11/16/2010 04:45:01 | 19.543 | 11/14/2010 11:49:01 | 26.550 | 12/17/2010 00:50:01 |
| 11/16/2010 05:05:01 | 19.042 | 11/14/2010 12:09:01 | 26.550 | 12/17/2010 01:22:01 |
| 11/16/2010 05:25:01 | 18.729 | 11/14/2010 12:29:01 | 26.550 | 12/17/2010 01:54:01 |
| 11/16/2010 05:45:01 | 18.854 | 11/14/2010 12:49:01 | 26.550 | 12/17/2010 02:26:01 |
| 11/16/2010 06:05:01 | 19.418 | 11/14/2010 13:09:01 | 26.550 | 12/17/2010 02:58:01 |
| 11/16/2010 06:25:01 | 20.982 | 11/14/2010 13:29:01 | 26.550 | 12/17/2010 03:30:01 |
| 11/16/2010 06:45:01 | 23.672 | 11/14/2010 13:49:01 | 26.613 | 12/17/2010 04:02:01 |
| 11/16/2010 07:05:01 | 26.546 | 11/14/2010 14:09:01 | 26.613 | 12/17/2010 04:34:01 |
| 11/16/2010 07:25:01 | 28.482 | 11/14/2010 14:29:01 | 26.675 | 12/17/2010 05:06:01 |
| 11/16/2010 07:45:01 | 29.543 | 11/14/2010 14:49:01 | 26.675 | 12/17/2010 05:38:01 |
| 11/16/2010 08:05:01 | 31.041 | 11/14/2010 15:09:01 | 26.738 | 12/17/2010 06:10:01 |
| 11/16/2010 08:25:01 | 31.789 | 11/14/2010 15:29:01 | 26.800 | 12/17/2010 06:42:01 |
| 11/16/2010 08:45:01 | 32.538 | 11/14/2010 15:49:01 | 26.800 | 12/17/2010 07:14:01 |
| 11/16/2010 09:05:01 | 33.597 | 11/14/2010 16:09:01 | 26.862 | 12/17/2010 07:46:01 |
| 11/16/2010 09:25:01 | 35.218 | 11/14/2010 16:29:01 | 26.925 | 12/17/2010 08:18:01 |
| 11/16/2010 09:45:01 | 36.339 | 11/14/2010 16:49:01 | 26.925 | 12/17/2010 08:50:01 |
| 11/16/2010 10:05:01 | 37.086 | 11/14/2010 17:09:01 | 26.987 | 12/17/2010 09:22:01 |
| 11/16/2010 10:25:01 | 37.646 | 11/14/2010 17:29:01 | 26.987 | 12/17/2010 09:54:01 |
| 11/16/2010 10:45:01 | 37.771 | 11/14/2010 17:49:01 | 27.050 | 12/17/2010 10:26:01 |
| 11/16/2010 11:05:01 | 38.144 | 11/14/2010 18:09:01 | 27.112 | 12/17/2010 10:58:01 |
| 11/16/2010 11:25:01 | 37.895 | 11/14/2010 18:29:01 | 27.112 | 12/17/2010 11:30:01 |
| 11/16/2010 11:45:01 | 38.767 | 11/14/2010 18:49:01 | 27.175 | 12/17/2010 12:02:01 |
| 11/16/2010 12:05:01 | 39.762 | 11/14/2010 19:09:01 | 27.175 | 12/17/2010 12:34:01 |
| 11/16/2010 12:25:01 | 40.011 | 11/14/2010 19:29:01 | 27.237 | 12/17/2010 13:06:01 |
| 11/16/2010 12:45:01 | 40.011 | 11/14/2010 19:49:01 | 27.237 | 12/17/2010 13:38:01 |
| 11/16/2010 13:05:01 | 40.198 | 11/14/2010 20:09:01 | 27.237 | 12/17/2010 14:10:01 |
| 11/16/2010 13:25:01 | 40.384 | 11/14/2010 20:29:01 | 27.300 | 12/17/2010 14:42:01 |
| 11/16/2010 13:45:01 | 40.384 | 11/14/2010 20:49:01 | 27.300 | 12/17/2010 15:14:01 |

|                     |        |                     |        |                     |
|---------------------|--------|---------------------|--------|---------------------|
| 11/16/2010 14:05:01 | 39.700 | 11/14/2010 21:09:01 | 27.300 | 12/17/2010 15:46:01 |
| 11/16/2010 14:25:01 | 39.451 | 11/14/2010 21:29:01 | 27.300 | 12/17/2010 16:18:01 |
| 11/16/2010 14:45:01 | 39.078 | 11/14/2010 21:49:01 | 27.300 | 12/17/2010 16:50:01 |
| 11/16/2010 15:05:01 | 38.082 | 11/14/2010 22:09:01 | 27.300 | 12/17/2010 17:22:01 |
| 11/16/2010 15:25:01 | 37.273 | 11/14/2010 22:29:01 | 27.300 | 12/17/2010 17:54:01 |
| 11/16/2010 15:45:01 | 36.962 | 11/14/2010 22:49:01 | 27.300 | 12/17/2010 18:26:01 |
| 11/16/2010 16:05:01 | 36.712 | 11/14/2010 23:09:01 | 27.300 | 12/17/2010 18:58:01 |
| 11/16/2010 16:25:01 | 36.027 | 11/14/2010 23:29:01 | 27.300 | 12/17/2010 19:30:01 |
| 11/16/2010 16:45:01 | 35.280 | 11/14/2010 23:49:01 | 27.300 | 12/17/2010 20:02:01 |
| 11/16/2010 17:05:01 | 34.034 | 11/15/2010 00:09:01 | 27.300 | 12/17/2010 20:34:01 |
| 11/16/2010 17:25:01 | 33.161 | 11/15/2010 00:29:01 | 27.300 | 12/17/2010 21:06:01 |
| 11/16/2010 17:45:01 | 31.914 | 11/15/2010 00:49:01 | 27.300 | 12/17/2010 21:38:01 |
| 11/16/2010 18:05:01 | 30.230 | 11/15/2010 01:09:01 | 27.300 | 12/17/2010 22:10:01 |
| 11/16/2010 18:25:01 | 28.607 | 11/15/2010 01:29:01 | 27.300 | 12/17/2010 22:42:01 |
| 11/16/2010 18:45:01 | 27.233 | 11/15/2010 01:49:01 | 27.300 | 12/17/2010 23:14:01 |
| 11/16/2010 19:05:01 | 26.359 | 11/15/2010 02:09:01 | 27.300 | 12/17/2010 23:46:01 |
| 11/16/2010 19:25:01 | 25.672 | 11/15/2010 02:29:01 | 27.300 | 12/18/2010 00:18:01 |
| 11/16/2010 19:45:01 | 25.359 | 11/15/2010 02:49:01 | 27.237 | 12/18/2010 00:50:01 |
| 11/16/2010 20:05:01 | 25.109 | 11/15/2010 03:09:01 | 27.237 | 12/18/2010 01:22:01 |
| 11/16/2010 20:25:01 | 25.172 | 11/15/2010 03:29:01 | 27.237 | 12/18/2010 01:54:01 |
| 11/16/2010 20:45:01 | 25.297 | 11/15/2010 03:49:01 | 27.237 | 12/18/2010 02:26:01 |
| 11/16/2010 21:05:01 | 25.172 | 11/15/2010 04:09:01 | 27.237 | 12/18/2010 02:58:01 |
| 11/16/2010 21:25:01 | 25.109 | 11/15/2010 04:29:01 | 27.175 | 12/18/2010 03:30:01 |
| 11/16/2010 21:45:01 | 24.859 | 11/15/2010 04:49:01 | 27.175 | 12/18/2010 04:02:01 |
| 11/16/2010 22:05:01 | 24.547 | 11/15/2010 05:09:01 | 27.175 | 12/18/2010 04:34:01 |
| 11/16/2010 22:25:01 | 24.297 | 11/15/2010 05:29:01 | 27.175 | 12/18/2010 05:06:01 |
| 11/16/2010 22:45:01 | 23.859 | 11/15/2010 05:49:01 | 27.175 | 12/18/2010 05:38:01 |
| 11/16/2010 23:05:01 | 23.297 | 11/15/2010 06:09:01 | 27.112 | 12/18/2010 06:10:01 |
| 11/16/2010 23:25:01 | 22.921 | 11/15/2010 06:29:01 | 27.112 | 12/18/2010 06:42:01 |
| 11/16/2010 23:45:01 | 22.546 | 11/15/2010 06:49:01 | 27.112 | 12/18/2010 07:14:01 |
| 11/17/2010 00:05:01 | 22.234 | 11/15/2010 07:09:01 | 27.050 | 12/18/2010 07:46:01 |
| 11/17/2010 00:25:01 | 22.108 | 11/15/2010 07:29:01 | 27.050 | 12/18/2010 08:18:01 |
| 11/17/2010 00:45:01 | 21.983 | 11/15/2010 07:49:01 | 27.050 | 12/18/2010 08:50:01 |
| 11/17/2010 01:05:01 | 21.671 | 11/15/2010 08:09:01 | 26.987 | 12/18/2010 09:22:01 |
| 11/17/2010 01:25:01 | 21.420 | 11/15/2010 08:29:01 | 26.987 | 12/18/2010 09:54:01 |
| 11/17/2010 01:45:01 | 21.358 | 11/15/2010 08:49:01 | 26.987 | 12/18/2010 10:26:01 |
| 11/17/2010 02:05:01 | 21.358 | 11/15/2010 09:09:01 | 26.925 | 12/18/2010 10:58:01 |
| 11/17/2010 02:25:01 | 21.358 | 11/15/2010 09:29:01 | 26.925 | 12/18/2010 11:30:01 |
| 11/17/2010 02:45:01 | 21.295 | 11/15/2010 09:49:01 | 26.925 |                     |
| 11/17/2010 03:05:01 | 20.920 | 11/15/2010 10:09:01 | 26.862 |                     |
| 11/17/2010 03:25:01 | 20.544 | 11/15/2010 10:29:01 | 26.862 |                     |
| 11/17/2010 03:45:01 | 20.544 | 11/15/2010 10:49:01 | 26.862 |                     |
| 11/17/2010 04:05:01 | 20.482 | 11/15/2010 11:09:01 | 26.862 |                     |
| 11/17/2010 04:25:01 | 20.419 | 11/15/2010 11:29:01 | 26.862 |                     |
| 11/17/2010 04:45:01 | 20.044 | 11/15/2010 11:49:01 | 26.862 |                     |
| 11/17/2010 05:05:01 | 19.668 | 11/15/2010 12:09:01 | 26.862 |                     |
| 11/17/2010 05:25:01 | 19.543 | 11/15/2010 12:29:01 | 26.862 |                     |
| 11/17/2010 05:45:01 | 19.480 | 11/15/2010 12:49:01 | 26.862 |                     |
| 11/17/2010 06:05:01 | 20.419 | 11/15/2010 13:09:01 | 26.862 |                     |
| 11/17/2010 06:25:01 | 22.359 | 11/15/2010 13:29:01 | 26.862 |                     |

|                     |        |                     |        |
|---------------------|--------|---------------------|--------|
| 11/17/2010 06:45:01 | 25.109 | 11/15/2010 13:49:01 | 26.862 |
| 11/17/2010 07:05:01 | 26.859 | 11/15/2010 14:09:01 | 26.925 |
| 11/17/2010 07:25:01 | 27.983 | 11/15/2010 14:29:01 | 26.925 |
| 11/17/2010 07:45:01 | 28.732 | 11/15/2010 14:49:01 | 26.925 |
| 11/17/2010 08:05:01 | 29.855 | 11/15/2010 15:09:01 | 26.987 |
| 11/17/2010 08:25:01 | 31.914 | 11/15/2010 15:29:01 | 27.050 |
| 11/17/2010 08:45:01 | 32.538 | 11/15/2010 15:49:01 | 27.050 |
| 11/17/2010 09:05:01 | 32.912 | 11/15/2010 16:09:01 | 27.112 |
| 11/17/2010 09:25:01 | 34.781 | 11/15/2010 16:29:01 | 27.112 |
| 11/17/2010 09:45:01 | 36.276 | 11/15/2010 16:49:01 | 27.175 |
| 11/17/2010 10:05:01 | 37.211 | 11/15/2010 17:09:01 | 27.175 |
| 11/17/2010 10:25:01 | 37.397 | 11/15/2010 17:29:01 | 27.237 |
| 11/17/2010 10:45:01 | 37.895 | 11/15/2010 17:49:01 | 27.300 |
| 11/17/2010 11:05:01 | 38.642 | 11/15/2010 18:09:01 | 27.300 |
| 11/17/2010 11:25:01 | 37.522 | 11/15/2010 18:29:01 | 27.300 |
| 11/17/2010 11:45:01 | 37.709 | 11/15/2010 18:49:01 | 27.362 |
| 11/17/2010 12:05:01 | 39.451 | 11/15/2010 19:09:01 | 27.362 |
| 11/17/2010 12:25:01 | 37.086 | 11/15/2010 19:29:01 | 27.425 |
| 11/17/2010 12:45:01 | 36.526 | 11/15/2010 19:49:01 | 27.425 |
| 11/17/2010 13:05:01 | 35.778 | 11/15/2010 20:09:01 | 27.425 |
| 11/17/2010 13:25:01 | 38.829 | 11/15/2010 20:29:01 | 27.425 |
| 11/17/2010 13:45:01 | 38.767 | 11/15/2010 20:49:01 | 27.425 |
| 11/17/2010 14:05:01 | 36.090 | 11/15/2010 21:09:01 | 27.425 |
| 11/17/2010 14:25:01 | 36.526 | 11/15/2010 21:29:01 | 27.425 |
| 11/17/2010 14:45:01 | 35.280 | 11/15/2010 21:49:01 | 27.425 |
| 11/17/2010 15:05:01 | 34.595 | 11/15/2010 22:09:01 | 27.487 |
| 11/17/2010 15:25:01 | 35.218 | 11/15/2010 22:29:01 | 27.425 |
| 11/17/2010 15:45:01 | 34.781 | 11/15/2010 22:49:01 | 27.425 |
| 11/17/2010 16:05:01 | 35.155 | 11/15/2010 23:09:01 | 27.425 |
| 11/17/2010 16:25:01 | 34.034 | 11/15/2010 23:29:01 | 27.425 |
| 11/17/2010 16:45:01 | 33.410 | 11/15/2010 23:49:01 | 27.425 |
| 11/17/2010 17:05:01 | 33.099 | 11/16/2010 00:09:01 | 27.425 |
| 11/17/2010 17:25:01 | 32.475 | 11/16/2010 00:29:01 | 27.362 |
| 11/17/2010 17:45:01 | 31.477 | 11/16/2010 00:49:01 | 27.362 |
| 11/17/2010 18:05:01 | 30.417 | 11/16/2010 01:09:01 | 27.362 |
| 11/17/2010 18:25:01 | 29.169 | 11/16/2010 01:29:01 | 27.362 |
| 11/17/2010 18:45:01 | 28.482 | 11/16/2010 01:49:01 | 27.362 |
| 11/17/2010 19:05:01 | 27.546 | 11/16/2010 02:09:01 | 27.300 |
| 11/17/2010 19:25:01 | 27.421 | 11/16/2010 02:29:01 | 27.300 |
| 11/17/2010 19:45:01 | 27.109 | 11/16/2010 02:49:01 | 27.300 |
| 11/17/2010 20:05:01 | 26.546 | 11/16/2010 03:09:01 | 27.237 |
| 11/17/2010 20:25:01 | 25.734 | 11/16/2010 03:29:01 | 27.237 |
| 11/17/2010 20:45:01 | 24.984 | 11/16/2010 03:49:01 | 27.237 |
| 11/17/2010 21:05:01 | 24.359 | 11/16/2010 04:09:01 | 27.237 |
| 11/17/2010 21:25:01 | 23.797 | 11/16/2010 04:29:01 | 27.175 |
| 11/17/2010 21:45:01 | 23.422 | 11/16/2010 04:49:01 | 27.175 |
| 11/17/2010 22:05:01 | 23.172 | 11/16/2010 05:09:01 | 27.175 |
| 11/17/2010 22:25:01 | 22.859 | 11/16/2010 05:29:01 | 27.112 |
| 11/17/2010 22:45:01 | 22.734 | 11/16/2010 05:49:01 | 27.112 |
| 11/17/2010 23:05:01 | 22.546 | 11/16/2010 06:09:01 | 27.112 |



|                     |        |                     |        |
|---------------------|--------|---------------------|--------|
| 11/17/2010 23:25:01 | 22.234 | 11/16/2010 06:29:01 | 27.112 |
| 11/17/2010 23:45:01 | 22.108 | 11/16/2010 06:49:01 | 27.050 |
| 11/18/2010 00:05:01 | 22.484 | 11/16/2010 07:09:01 | 27.050 |
| 11/18/2010 00:25:01 | 22.921 | 11/16/2010 07:29:01 | 26.987 |
| 11/18/2010 00:45:01 | 22.984 | 11/16/2010 07:49:01 | 26.987 |
| 11/18/2010 01:05:01 | 22.484 | 11/16/2010 08:09:01 | 26.987 |
| 11/18/2010 01:25:01 | 21.921 | 11/16/2010 08:29:01 | 26.925 |
| 11/18/2010 01:45:01 | 21.483 | 11/16/2010 08:49:01 | 26.925 |
| 11/18/2010 02:05:01 | 21.170 | 11/16/2010 09:09:01 | 26.925 |
| 11/18/2010 02:25:01 | 20.857 | 11/16/2010 09:29:01 | 26.862 |
| 11/18/2010 02:45:01 | 20.544 | 11/16/2010 09:49:01 | 26.862 |
| 11/18/2010 03:05:01 | 20.482 | 11/16/2010 10:09:01 | 26.862 |
| 11/18/2010 03:25:01 | 20.419 | 11/16/2010 10:29:01 | 26.862 |
| 11/18/2010 03:45:01 | 20.231 | 11/16/2010 10:49:01 | 26.862 |
| 11/18/2010 04:05:01 | 20.044 | 11/16/2010 11:09:01 | 26.800 |
| 11/18/2010 04:25:01 | 19.918 | 11/16/2010 11:29:01 | 26.800 |
| 11/18/2010 04:45:01 | 19.856 | 11/16/2010 11:49:01 | 26.800 |
| 11/18/2010 05:05:01 | 19.731 | 11/16/2010 12:09:01 | 26.800 |
| 11/18/2010 05:25:01 | 19.606 | 11/16/2010 12:29:01 | 26.800 |
| 11/18/2010 05:45:01 | 19.918 | 11/16/2010 12:49:01 | 26.862 |
| 11/18/2010 06:05:01 | 20.669 | 11/16/2010 13:09:01 | 26.862 |
| 11/18/2010 06:25:01 | 22.234 | 11/16/2010 13:29:01 | 26.862 |
| 11/18/2010 06:45:01 | 24.359 | 11/16/2010 13:49:01 | 26.862 |
| 11/18/2010 07:05:01 | 26.484 | 11/16/2010 14:09:01 | 26.925 |
| 11/18/2010 07:25:01 | 28.482 | 11/16/2010 14:29:01 | 26.925 |
| 11/18/2010 07:45:01 | 29.668 | 11/16/2010 14:49:01 | 26.987 |
| 11/18/2010 08:05:01 | 31.353 | 11/16/2010 15:09:01 | 26.987 |
| 11/18/2010 08:25:01 | 32.849 | 11/16/2010 15:29:01 | 27.050 |
| 11/18/2010 08:45:01 | 33.223 | 11/16/2010 15:49:01 | 27.112 |
| 11/18/2010 09:05:01 | 34.470 | 11/16/2010 16:09:01 | 27.112 |
| 11/18/2010 09:25:01 | 36.463 | 11/16/2010 16:29:01 | 27.175 |
| 11/18/2010 09:45:01 | 39.140 | 11/16/2010 16:49:01 | 27.237 |
| 11/18/2010 10:05:01 | 37.273 | 11/16/2010 17:09:01 | 27.237 |
| 11/18/2010 10:25:01 | 36.276 | 11/16/2010 17:29:01 | 27.300 |
| 11/18/2010 10:45:01 | 35.529 | 11/16/2010 17:49:01 | 27.362 |
| 11/18/2010 11:05:01 | 37.397 | 11/16/2010 18:09:01 | 27.362 |
| 11/18/2010 11:25:01 | 39.576 | 11/16/2010 18:29:01 | 27.425 |
| 11/18/2010 11:45:01 | 35.529 | 11/16/2010 18:49:01 | 27.425 |
| 11/18/2010 12:05:01 | 37.273 | 11/16/2010 19:09:01 | 27.425 |
| 11/18/2010 12:25:01 | 37.771 | 11/16/2010 19:29:01 | 27.487 |
| 11/18/2010 12:45:01 | 36.775 | 11/16/2010 19:49:01 | 27.487 |
| 11/18/2010 13:05:01 | 37.024 | 11/16/2010 20:09:01 | 27.487 |
| 11/18/2010 13:25:01 | 41.131 | 11/16/2010 20:29:01 | 27.550 |
| 11/18/2010 13:45:01 | 39.638 | 11/16/2010 20:49:01 | 27.550 |
| 11/18/2010 14:05:01 | 39.389 | 11/16/2010 21:09:01 | 27.550 |
| 11/18/2010 14:25:01 | 40.758 | 11/16/2010 21:29:01 | 27.550 |
| 11/18/2010 14:45:01 | 39.576 | 11/16/2010 21:49:01 | 27.550 |
| 11/18/2010 15:05:01 | 38.269 | 11/16/2010 22:09:01 | 27.550 |
| 11/18/2010 15:25:01 | 38.082 | 11/16/2010 22:29:01 | 27.550 |
| 11/18/2010 15:45:01 | 37.148 | 11/16/2010 22:49:01 | 27.550 |

|                     |        |                     |        |
|---------------------|--------|---------------------|--------|
| 11/18/2010 16:05:01 | 35.965 | 11/16/2010 23:09:01 | 27.550 |
| 11/18/2010 16:25:01 | 34.345 | 11/16/2010 23:29:01 | 27.550 |
| 11/18/2010 16:45:01 | 33.473 | 11/16/2010 23:49:01 | 27.487 |
| 11/18/2010 17:05:01 | 32.600 | 11/17/2010 00:09:01 | 27.487 |
| 11/18/2010 17:25:01 | 31.602 | 11/17/2010 00:29:01 | 27.487 |
| 11/18/2010 17:45:01 | 30.667 | 11/17/2010 00:49:01 | 27.487 |
| 11/18/2010 18:05:01 | 29.668 | 11/17/2010 01:09:01 | 27.487 |
| 11/18/2010 18:25:01 | 28.857 | 11/17/2010 01:29:01 | 27.425 |
| 11/18/2010 18:45:01 | 28.357 | 11/17/2010 01:49:01 | 27.425 |
| 11/18/2010 19:05:01 | 27.920 | 11/17/2010 02:09:01 | 27.425 |
| 11/18/2010 19:25:01 | 27.546 | 11/17/2010 02:29:01 | 27.425 |
| 11/18/2010 19:45:01 | 27.171 | 11/17/2010 02:49:01 | 27.362 |
| 11/18/2010 20:05:01 | 26.671 | 11/17/2010 03:09:01 | 27.362 |
| 11/18/2010 20:25:01 | 26.172 | 11/17/2010 03:29:01 | 27.362 |
| 11/18/2010 20:45:01 | 25.672 | 11/17/2010 03:49:01 | 27.362 |
| 11/18/2010 21:05:01 | 25.422 | 11/17/2010 04:09:01 | 27.300 |
| 11/18/2010 21:25:01 | 24.859 | 11/17/2010 04:29:01 | 27.300 |
| 11/18/2010 21:45:01 | 24.359 | 11/17/2010 04:49:01 | 27.300 |
| 11/18/2010 22:05:01 | 23.984 | 11/17/2010 05:09:01 | 27.237 |
| 11/18/2010 22:25:01 | 23.797 | 11/17/2010 05:29:01 | 27.237 |
| 11/18/2010 22:45:01 | 23.609 | 11/17/2010 05:49:01 | 27.237 |
| 11/18/2010 23:05:01 | 23.422 | 11/17/2010 06:09:01 | 27.175 |
| 11/18/2010 23:25:01 | 23.297 | 11/17/2010 06:29:01 | 27.175 |
| 11/18/2010 23:45:01 | 23.297 | 11/17/2010 06:49:01 | 27.175 |
| 11/19/2010 00:05:01 | 23.547 | 11/17/2010 07:09:01 | 27.175 |
| 11/19/2010 00:25:01 | 23.734 | 11/17/2010 07:29:01 | 27.112 |
| 11/19/2010 00:45:01 | 24.047 | 11/17/2010 07:49:01 | 27.112 |
| 11/19/2010 01:05:01 | 24.609 | 11/17/2010 08:09:01 | 27.112 |
| 11/19/2010 01:25:01 | 24.547 | 11/17/2010 08:29:01 | 27.050 |
| 11/19/2010 01:45:01 | 23.297 | 11/17/2010 08:49:01 | 27.050 |
| 11/19/2010 02:05:01 | 22.984 | 11/17/2010 09:09:01 | 27.050 |
| 11/19/2010 02:25:01 | 22.984 | 11/17/2010 09:29:01 | 26.987 |
| 11/19/2010 02:45:01 | 22.984 | 11/17/2010 09:49:01 | 26.987 |
| 11/19/2010 03:05:01 | 22.921 | 11/17/2010 10:09:01 | 26.987 |
| 11/19/2010 03:25:01 | 22.859 | 11/17/2010 10:29:01 | 26.925 |
| 11/19/2010 03:45:01 | 22.671 | 11/17/2010 10:49:01 | 26.925 |
| 11/19/2010 04:05:01 | 22.796 | 11/17/2010 11:09:01 | 26.925 |
| 11/19/2010 04:25:01 | 22.609 | 11/17/2010 11:29:01 | 26.925 |
| 11/19/2010 04:45:01 | 22.296 | 11/17/2010 11:49:01 | 26.925 |
| 11/19/2010 05:05:01 | 22.108 | 11/17/2010 12:09:01 | 26.925 |
| 11/19/2010 05:25:01 | 21.983 | 11/17/2010 12:29:01 | 26.925 |
| 11/19/2010 05:45:01 | 21.921 | 11/17/2010 12:49:01 | 26.925 |
| 11/19/2010 06:05:01 | 22.046 | 11/17/2010 13:09:01 | 26.925 |
| 11/19/2010 06:25:01 | 22.484 | 11/17/2010 13:29:01 | 26.987 |
| 11/19/2010 06:45:01 | 23.234 | 11/17/2010 13:49:01 | 26.987 |
| 11/19/2010 07:05:01 | 25.609 | 11/17/2010 14:09:01 | 26.987 |
| 11/19/2010 07:25:01 | 28.482 | 11/17/2010 14:29:01 | 27.050 |
| 11/19/2010 07:45:01 | 29.793 | 11/17/2010 14:49:01 | 27.050 |
| 11/19/2010 08:05:01 | 30.916 | 11/17/2010 15:09:01 | 27.112 |
| 11/19/2010 08:25:01 | 32.039 | 11/17/2010 15:29:01 | 27.112 |

|                     |        |                     |        |
|---------------------|--------|---------------------|--------|
| 11/19/2010 08:45:01 | 33.036 | 11/17/2010 15:49:01 | 27.175 |
| 11/19/2010 09:05:01 | 34.719 | 11/17/2010 16:09:01 | 27.175 |
| 11/19/2010 09:25:01 | 34.470 | 11/17/2010 16:29:01 | 27.175 |
| 11/19/2010 09:45:01 | 38.144 | 11/17/2010 16:49:01 | 27.237 |
| 11/19/2010 10:05:01 | 39.140 | 11/17/2010 17:09:01 | 27.237 |
| 11/19/2010 10:25:01 | 36.339 | 11/17/2010 17:29:01 | 27.300 |
| 11/19/2010 10:45:01 | 34.968 | 11/17/2010 17:49:01 | 27.300 |
| 11/19/2010 11:05:01 | 33.847 | 11/17/2010 18:09:01 | 27.300 |
| 11/19/2010 11:25:01 | 34.345 | 11/17/2010 18:29:01 | 27.362 |
| 11/19/2010 11:45:01 | 35.841 | 11/17/2010 18:49:01 | 27.362 |
| 11/19/2010 12:05:01 | 37.273 | 11/17/2010 19:09:01 | 27.362 |
| 11/19/2010 12:25:01 | 38.269 | 11/17/2010 19:29:01 | 27.362 |
| 11/19/2010 12:45:01 | 36.526 | 11/17/2010 19:49:01 | 27.425 |
| 11/19/2010 13:05:01 | 36.712 | 11/17/2010 20:09:01 | 27.425 |
| 11/19/2010 13:25:01 | 35.155 | 11/17/2010 20:29:01 | 27.425 |
| 11/19/2010 13:45:01 | 37.522 | 11/17/2010 20:49:01 | 27.425 |
| 11/19/2010 14:05:01 | 40.260 | 11/17/2010 21:09:01 | 27.425 |
| 11/19/2010 14:25:01 | 34.844 | 11/17/2010 21:29:01 | 27.425 |
| 11/19/2010 14:45:01 | 29.668 | 11/17/2010 21:49:01 | 27.425 |
| 11/19/2010 15:05:01 | 26.609 | 11/17/2010 22:09:01 | 27.425 |
| 11/19/2010 15:25:01 | 24.922 | 11/17/2010 22:29:01 | 27.425 |
| 11/19/2010 15:45:01 | 24.609 | 11/17/2010 22:49:01 | 27.425 |
| 11/19/2010 16:05:01 | 24.797 | 11/17/2010 23:09:01 | 27.425 |
| 11/19/2010 16:25:01 | 24.672 | 11/17/2010 23:29:01 | 27.425 |
| 11/19/2010 16:45:01 | 24.359 | 11/17/2010 23:49:01 | 27.425 |
| 11/19/2010 17:05:01 | 24.234 | 11/18/2010 00:09:01 | 27.425 |
| 11/19/2010 17:25:01 | 24.109 | 11/18/2010 00:29:01 | 27.425 |
| 11/19/2010 17:45:01 | 24.109 | 11/18/2010 00:49:01 | 27.362 |
| 11/19/2010 18:05:01 | 24.109 | 11/18/2010 01:09:01 | 27.362 |
| 11/19/2010 18:25:01 | 24.109 | 11/18/2010 01:29:01 | 27.362 |
| 11/19/2010 18:45:01 | 23.984 | 11/18/2010 01:49:01 | 27.362 |
| 11/19/2010 19:05:01 | 23.984 | 11/18/2010 02:09:01 | 27.362 |
| 11/19/2010 19:25:01 | 23.922 | 11/18/2010 02:29:01 | 27.300 |
| 11/19/2010 19:45:01 | 23.797 | 11/18/2010 02:49:01 | 27.300 |
| 11/19/2010 20:05:01 | 23.609 | 11/18/2010 03:09:01 | 27.300 |
| 11/19/2010 20:25:01 | 23.422 | 11/18/2010 03:29:01 | 27.300 |
| 11/19/2010 20:45:01 | 23.422 | 11/18/2010 03:49:01 | 27.300 |
| 11/19/2010 21:05:01 | 23.234 | 11/18/2010 04:09:01 | 27.237 |
| 11/19/2010 21:25:01 | 23.234 | 11/18/2010 04:29:01 | 27.237 |
| 11/19/2010 21:45:01 | 23.172 | 11/18/2010 04:49:01 | 27.237 |
| 11/19/2010 22:05:01 | 23.359 | 11/18/2010 05:09:01 | 27.175 |
| 11/19/2010 22:25:01 | 23.484 | 11/18/2010 05:29:01 | 27.175 |
| 11/19/2010 22:45:01 | 23.672 | 11/18/2010 05:49:01 | 27.175 |
| 11/19/2010 23:05:01 | 23.609 | 11/18/2010 06:09:01 | 27.175 |
| 11/19/2010 23:25:01 | 23.484 | 11/18/2010 06:29:01 | 27.112 |
| 11/19/2010 23:45:01 | 22.796 | 11/18/2010 06:49:01 | 27.112 |
| 11/20/2010 00:05:01 | 21.921 | 11/18/2010 07:09:01 | 27.112 |
| 11/20/2010 00:25:01 | 21.295 | 11/18/2010 07:29:01 | 27.112 |
| 11/20/2010 00:45:01 | 20.920 | 11/18/2010 07:49:01 | 27.050 |
| 11/20/2010 01:05:01 | 20.920 | 11/18/2010 08:09:01 | 27.050 |

|                     |        |                     |        |
|---------------------|--------|---------------------|--------|
| 11/20/2010 01:25:01 | 20.857 | 11/18/2010 08:29:01 | 26.987 |
| 11/20/2010 01:45:01 | 20.795 | 11/18/2010 08:49:01 | 26.987 |
| 11/20/2010 02:05:01 | 20.795 | 11/18/2010 09:09:01 | 26.987 |
| 11/20/2010 02:25:01 | 20.732 | 11/18/2010 09:29:01 | 26.987 |
| 11/20/2010 02:45:01 | 20.732 | 11/18/2010 09:49:01 | 26.925 |
| 11/20/2010 03:05:01 | 20.795 | 11/18/2010 10:09:01 | 26.925 |
| 11/20/2010 03:25:01 | 20.920 | 11/18/2010 10:29:01 | 26.925 |
| 11/20/2010 03:45:01 | 20.857 | 11/18/2010 10:49:01 | 26.925 |
| 11/20/2010 04:05:01 | 20.857 | 11/18/2010 11:09:01 | 26.925 |
| 11/20/2010 04:25:01 | 20.857 | 11/18/2010 11:29:01 | 26.925 |
| 11/20/2010 04:45:01 | 20.795 | 11/18/2010 11:49:01 | 26.925 |
| 11/20/2010 05:05:01 | 20.920 | 11/18/2010 12:09:01 | 26.925 |
| 11/20/2010 05:25:01 | 20.857 | 11/18/2010 12:29:01 | 26.925 |
| 11/20/2010 05:45:01 | 20.982 | 11/18/2010 12:49:01 | 26.925 |
| 11/20/2010 06:05:01 | 21.358 | 11/18/2010 13:09:01 | 26.925 |
| 11/20/2010 06:25:01 | 21.796 | 11/18/2010 13:29:01 | 26.987 |
| 11/20/2010 06:45:01 | 22.108 | 11/18/2010 13:49:01 | 26.987 |
| 11/20/2010 07:05:01 | 22.609 | 11/18/2010 14:09:01 | 27.050 |
| 11/20/2010 07:25:01 | 23.047 | 11/18/2010 14:29:01 | 27.050 |
| 11/20/2010 07:45:01 | 23.922 | 11/18/2010 14:49:01 | 27.050 |
| 11/20/2010 08:05:01 | 25.234 | 11/18/2010 15:09:01 | 27.112 |
| 11/20/2010 08:25:01 | 26.234 | 11/18/2010 15:29:01 | 27.112 |
| 11/20/2010 08:45:01 | 27.046 | 11/18/2010 15:49:01 | 27.175 |
| 11/20/2010 09:05:01 | 28.857 | 11/18/2010 16:09:01 | 27.175 |
| 11/20/2010 09:25:01 | 30.355 | 11/18/2010 16:29:01 | 27.237 |
| 11/20/2010 09:45:01 | 32.912 | 11/18/2010 16:49:01 | 27.237 |
| 11/20/2010 10:05:01 | 32.288 | 11/18/2010 17:09:01 | 27.300 |
| 11/20/2010 10:25:01 | 32.475 | 11/18/2010 17:29:01 | 27.300 |
| 11/20/2010 10:45:01 | 30.916 | 11/18/2010 17:49:01 | 27.300 |
| 11/20/2010 11:05:01 | 33.784 | 11/18/2010 18:09:01 | 27.362 |
| 11/20/2010 11:25:01 | 35.280 | 11/18/2010 18:29:01 | 27.362 |
| 11/20/2010 11:45:01 | 35.093 | 11/18/2010 18:49:01 | 27.425 |
| 11/20/2010 12:05:01 | 34.221 | 11/18/2010 19:09:01 | 27.425 |
| 11/20/2010 12:25:01 | 35.404 | 11/18/2010 19:29:01 | 27.425 |
| 11/20/2010 12:45:01 | 37.211 | 11/18/2010 19:49:01 | 27.487 |
| 11/20/2010 13:05:01 | 34.906 | 11/18/2010 20:09:01 | 27.487 |
| 11/20/2010 13:25:01 | 35.342 | 11/18/2010 20:29:01 | 27.487 |
| 11/20/2010 13:45:01 | 36.712 | 11/18/2010 20:49:01 | 27.550 |
| 11/20/2010 14:05:01 | 34.968 | 11/18/2010 21:09:01 | 27.550 |
| 11/20/2010 14:25:01 | 36.214 | 11/18/2010 21:29:01 | 27.550 |
| 11/20/2010 14:45:01 | 33.473 | 11/18/2010 21:49:01 | 27.550 |
| 11/20/2010 15:05:01 | 33.597 | 11/18/2010 22:09:01 | 27.550 |
| 11/20/2010 15:25:01 | 33.036 | 11/18/2010 22:29:01 | 27.550 |
| 11/20/2010 15:45:01 | 33.660 | 11/18/2010 22:49:01 | 27.550 |
| 11/20/2010 16:05:01 | 33.410 | 11/18/2010 23:09:01 | 27.550 |
| 11/20/2010 16:25:01 | 31.976 | 11/18/2010 23:29:01 | 27.550 |
| 11/20/2010 16:45:01 | 28.857 | 11/18/2010 23:49:01 | 27.550 |
| 11/20/2010 17:05:01 | 27.421 | 11/19/2010 00:09:01 | 27.550 |
| 11/20/2010 17:25:01 | 27.796 | 11/19/2010 00:29:01 | 27.550 |
| 11/20/2010 17:45:01 | 25.797 | 11/19/2010 00:49:01 | 27.550 |

|                     |        |                     |        |
|---------------------|--------|---------------------|--------|
| 11/20/2010 18:05:01 | 24.859 | 11/19/2010 01:09:01 | 27.487 |
| 11/20/2010 18:25:01 | 24.172 | 11/19/2010 01:29:01 | 27.487 |
| 11/20/2010 18:45:01 | 23.672 | 11/19/2010 01:49:01 | 27.487 |
| 11/20/2010 19:05:01 | 23.359 | 11/19/2010 02:09:01 | 27.487 |
| 11/20/2010 19:25:01 | 23.172 | 11/19/2010 02:29:01 | 27.487 |
| 11/20/2010 19:45:01 | 23.047 | 11/19/2010 02:49:01 | 27.425 |
| 11/20/2010 20:05:01 | 22.921 | 11/19/2010 03:09:01 | 27.425 |
| 11/20/2010 20:25:01 | 22.921 | 11/19/2010 03:29:01 | 27.425 |
| 11/20/2010 20:45:01 | 22.984 | 11/19/2010 03:49:01 | 27.425 |
| 11/20/2010 21:05:01 | 23.047 | 11/19/2010 04:09:01 | 27.425 |
| 11/20/2010 21:25:01 | 23.109 | 11/19/2010 04:29:01 | 27.362 |
| 11/20/2010 21:45:01 | 23.109 | 11/19/2010 04:49:01 | 27.362 |
| 11/20/2010 22:05:01 | 23.234 | 11/19/2010 05:09:01 | 27.362 |
| 11/20/2010 22:25:01 | 23.359 | 11/19/2010 05:29:01 | 27.362 |
| 11/20/2010 22:45:01 | 23.422 | 11/19/2010 05:49:01 | 27.300 |
| 11/20/2010 23:05:01 | 23.297 | 11/19/2010 06:09:01 | 27.300 |
| 11/20/2010 23:25:01 | 23.297 | 11/19/2010 06:29:01 | 27.300 |
| 11/20/2010 23:45:01 | 23.422 | 11/19/2010 06:49:01 | 27.300 |
| 11/21/2010 00:05:01 | 23.422 | 11/19/2010 07:09:01 | 27.300 |
| 11/21/2010 00:25:01 | 23.484 | 11/19/2010 07:29:01 | 27.237 |
| 11/21/2010 00:45:01 | 23.672 | 11/19/2010 07:49:01 | 27.237 |
| 11/21/2010 01:05:01 | 23.609 | 11/19/2010 08:09:01 | 27.237 |
| 11/21/2010 01:25:01 | 23.547 | 11/19/2010 08:29:01 | 27.175 |
| 11/21/2010 01:45:01 | 23.609 | 11/19/2010 08:49:01 | 27.175 |
| 11/21/2010 02:05:01 | 23.672 | 11/19/2010 09:09:01 | 27.175 |
| 11/21/2010 02:25:01 | 23.734 | 11/19/2010 09:29:01 | 27.175 |
| 11/21/2010 02:45:01 | 22.484 | 11/19/2010 09:49:01 | 27.175 |
| 11/21/2010 03:05:01 | 21.170 | 11/19/2010 10:09:01 | 27.112 |
| 11/21/2010 03:25:01 | 21.107 | 11/19/2010 10:29:01 | 27.112 |
| 11/21/2010 03:45:01 | 21.045 | 11/19/2010 10:49:01 | 27.112 |
| 11/21/2010 04:05:01 | 21.107 | 11/19/2010 11:09:01 | 27.112 |
| 11/21/2010 04:25:01 | 21.107 | 11/19/2010 11:29:01 | 27.112 |
| 11/21/2010 04:45:01 | 21.170 | 11/19/2010 11:49:01 | 27.112 |
| 11/21/2010 05:05:01 | 20.920 | 11/19/2010 12:09:01 | 27.112 |
| 11/21/2010 05:25:01 | 20.857 | 11/19/2010 12:29:01 | 27.112 |
| 11/21/2010 05:45:01 | 20.920 | 11/19/2010 12:49:01 | 27.112 |
| 11/21/2010 06:05:01 | 20.857 | 11/19/2010 13:09:01 | 27.175 |
| 11/21/2010 06:25:01 | 20.607 | 11/19/2010 13:29:01 | 27.175 |
| 11/21/2010 06:45:01 | 20.669 | 11/19/2010 13:49:01 | 27.175 |
| 11/21/2010 07:05:01 | 20.857 | 11/19/2010 14:09:01 | 27.237 |
| 11/21/2010 07:25:01 | 20.920 | 11/19/2010 14:29:01 | 27.237 |
| 11/21/2010 07:45:01 | 21.295 | 11/19/2010 14:49:01 | 27.237 |
| 11/21/2010 08:05:01 | 21.796 | 11/19/2010 15:09:01 | 27.300 |
| 11/21/2010 08:25:01 | 22.296 | 11/19/2010 15:29:01 | 27.300 |
| 11/21/2010 08:45:01 | 23.234 | 11/19/2010 15:49:01 | 27.300 |
| 11/21/2010 09:05:01 | 24.297 | 11/19/2010 16:09:01 | 27.362 |
| 11/21/2010 09:25:01 | 25.359 | 11/19/2010 16:29:01 | 27.362 |
| 11/21/2010 09:45:01 | 26.109 | 11/19/2010 16:49:01 | 27.362 |
| 11/21/2010 10:05:01 | 28.545 | 11/19/2010 17:09:01 | 27.425 |
| 11/21/2010 10:25:01 | 30.230 | 11/19/2010 17:29:01 | 27.425 |

|                     |        |                     |        |
|---------------------|--------|---------------------|--------|
| 11/21/2010 10:45:01 | 30.667 | 11/19/2010 17:49:01 | 27.487 |
| 11/21/2010 11:05:01 | 32.101 | 11/19/2010 18:09:01 | 27.487 |
| 11/21/2010 11:25:01 | 31.228 | 11/19/2010 18:29:01 | 27.487 |
| 11/21/2010 11:45:01 | 31.228 | 11/19/2010 18:49:01 | 27.487 |
| 11/21/2010 12:05:01 | 29.668 | 11/19/2010 19:09:01 | 27.487 |
| 11/21/2010 12:25:01 | 28.233 | 11/19/2010 19:29:01 | 27.487 |
| 11/21/2010 12:45:01 | 27.920 | 11/19/2010 19:49:01 | 27.487 |
| 11/21/2010 13:05:01 | 25.859 | 11/19/2010 20:09:01 | 27.550 |
| 11/21/2010 13:25:01 | 26.921 | 11/19/2010 20:29:01 | 27.487 |
| 11/21/2010 13:45:01 | 29.668 | 11/19/2010 20:49:01 | 27.487 |
| 11/21/2010 14:05:01 | 31.540 | 11/19/2010 21:09:01 | 27.550 |
| 11/21/2010 14:25:01 | 32.351 | 11/19/2010 21:29:01 | 27.487 |
| 11/21/2010 14:45:01 | 32.538 | 11/19/2010 21:49:01 | 27.487 |
| 11/21/2010 15:05:01 | 30.791 | 11/19/2010 22:09:01 | 27.487 |
| 11/21/2010 15:25:01 | 29.107 | 11/19/2010 22:29:01 | 27.487 |
| 11/21/2010 15:45:01 | 28.233 | 11/19/2010 22:49:01 | 27.487 |
| 11/21/2010 16:05:01 | 27.296 | 11/19/2010 23:09:01 | 27.487 |
| 11/21/2010 16:25:01 | 25.547 | 11/19/2010 23:29:01 | 27.487 |
| 11/21/2010 16:45:01 | 24.859 | 11/19/2010 23:49:01 | 27.425 |
| 11/21/2010 17:05:01 | 24.484 | 11/20/2010 00:09:01 | 27.425 |
| 11/21/2010 17:25:01 | 23.547 | 11/20/2010 00:29:01 | 27.425 |
| 11/21/2010 17:45:01 | 23.109 | 11/20/2010 00:49:01 | 27.425 |
| 11/21/2010 18:05:01 | 23.047 | 11/20/2010 01:09:01 | 27.300 |
| 11/21/2010 18:25:01 | 22.921 | 11/20/2010 01:29:01 | 27.050 |
| 11/21/2010 18:45:01 | 22.859 | 11/20/2010 01:49:01 | 26.862 |
| 11/21/2010 19:05:01 | 22.859 | 11/20/2010 02:09:01 | 26.800 |
| 11/21/2010 19:25:01 | 22.921 | 11/20/2010 02:29:01 | 26.675 |
| 11/21/2010 19:45:01 | 22.921 | 11/20/2010 02:49:01 | 26.550 |
| 11/21/2010 20:05:01 | 22.921 | 11/20/2010 03:09:01 | 26.488 |
| 11/21/2010 20:25:01 | 22.859 | 11/20/2010 03:29:01 | 26.425 |
| 11/21/2010 20:45:01 | 22.859 | 11/20/2010 03:49:01 | 26.363 |
| 11/21/2010 21:05:01 | 22.671 | 11/20/2010 04:09:01 | 26.363 |
| 11/21/2010 21:25:01 | 22.484 | 11/20/2010 04:29:01 | 26.300 |
| 11/21/2010 21:45:01 | 22.296 | 11/20/2010 04:49:01 | 26.238 |
| 11/21/2010 22:05:01 | 22.234 | 11/20/2010 05:09:01 | 26.238 |
| 11/21/2010 22:25:01 | 22.171 | 11/20/2010 05:29:01 | 26.175 |
| 11/21/2010 22:45:01 | 22.046 | 11/20/2010 05:49:01 | 26.175 |
| 11/21/2010 23:05:01 | 22.046 | 11/20/2010 06:09:01 | 26.175 |
| 11/21/2010 23:25:01 | 21.983 | 11/20/2010 06:29:01 | 26.113 |
| 11/21/2010 23:45:01 | 21.983 | 11/20/2010 06:49:01 | 26.113 |
| 11/22/2010 00:05:01 | 21.921 | 11/20/2010 07:09:01 | 26.113 |
| 11/22/2010 00:25:01 | 21.858 | 11/20/2010 07:29:01 | 26.050 |
| 11/22/2010 00:45:01 | 21.796 | 11/20/2010 07:49:01 | 26.050 |
| 11/22/2010 01:05:01 | 21.858 | 11/20/2010 08:09:01 | 26.050 |
| 11/22/2010 01:25:01 | 21.858 | 11/20/2010 08:29:01 | 26.050 |
| 11/22/2010 01:45:01 | 21.796 | 11/20/2010 08:49:01 | 25.988 |
| 11/22/2010 02:05:01 | 21.858 | 11/20/2010 09:09:01 | 25.988 |
| 11/22/2010 02:25:01 | 21.858 | 11/20/2010 09:29:01 | 25.988 |
| 11/22/2010 02:45:01 | 21.858 | 11/20/2010 09:49:01 | 25.988 |
| 11/22/2010 03:05:01 | 21.983 | 11/20/2010 10:09:01 | 25.988 |

|                     |        |                     |        |
|---------------------|--------|---------------------|--------|
| 11/22/2010 03:25:01 | 22.108 | 11/20/2010 10:29:01 | 25.988 |
| 11/22/2010 03:45:01 | 22.171 | 11/20/2010 10:49:01 | 25.988 |
| 11/22/2010 04:05:01 | 22.359 | 11/20/2010 11:09:01 | 26.050 |
| 11/22/2010 04:25:01 | 22.296 | 11/20/2010 11:29:01 | 26.050 |
| 11/22/2010 04:45:01 | 22.296 | 11/20/2010 11:49:01 | 26.050 |
| 11/22/2010 05:05:01 | 22.234 | 11/20/2010 12:09:01 | 26.113 |
| 11/22/2010 05:25:01 | 22.234 | 11/20/2010 12:29:01 | 26.113 |
| 11/22/2010 05:45:01 | 22.359 | 11/20/2010 12:49:01 | 26.113 |
| 11/22/2010 06:05:01 | 22.671 | 11/20/2010 13:09:01 | 26.175 |
| 11/22/2010 06:25:01 | 23.047 | 11/20/2010 13:29:01 | 26.238 |
| 11/22/2010 06:45:01 | 23.359 | 11/20/2010 13:49:01 | 26.238 |
| 11/22/2010 07:05:01 | 23.859 | 11/20/2010 14:09:01 | 26.300 |
| 11/22/2010 07:25:01 | 25.234 | 11/20/2010 14:29:01 | 26.363 |
| 11/22/2010 07:45:01 | 26.734 | 11/20/2010 14:49:01 | 26.363 |
| 11/22/2010 08:05:01 | 28.295 | 11/20/2010 15:09:01 | 26.425 |
| 11/22/2010 08:25:01 | 29.231 | 11/20/2010 15:29:01 | 26.488 |
| 11/22/2010 08:45:01 | 29.731 | 11/20/2010 15:49:01 | 26.488 |
| 11/22/2010 09:05:01 | 31.290 | 11/20/2010 16:09:01 | 26.550 |
| 11/22/2010 09:25:01 | 32.226 | 11/20/2010 16:29:01 | 26.613 |
| 11/22/2010 09:45:01 | 33.847 | 11/20/2010 16:49:01 | 26.613 |
| 11/22/2010 10:05:01 | 33.784 | 11/20/2010 17:09:01 | 26.675 |
| 11/22/2010 10:25:01 | 33.971 | 11/20/2010 17:29:01 | 26.675 |
| 11/22/2010 10:45:01 | 35.093 | 11/20/2010 17:49:01 | 26.738 |
| 11/22/2010 11:05:01 | 35.404 | 11/20/2010 18:09:01 | 26.738 |
| 11/22/2010 11:25:01 | 35.965 | 11/20/2010 18:29:01 | 26.738 |
| 11/22/2010 11:45:01 | 36.027 | 11/20/2010 18:49:01 | 26.800 |
| 11/22/2010 12:05:01 | 36.775 | 11/20/2010 19:09:01 | 26.800 |
| 11/22/2010 12:25:01 | 36.962 | 11/20/2010 19:29:01 | 26.800 |
| 11/22/2010 12:45:01 | 36.712 | 11/20/2010 19:49:01 | 26.800 |
| 11/22/2010 13:05:01 | 37.273 | 11/20/2010 20:09:01 | 26.862 |
| 11/22/2010 13:25:01 | 38.393 | 11/20/2010 20:29:01 | 26.862 |
| 11/22/2010 13:45:01 | 38.269 | 11/20/2010 20:49:01 | 26.862 |
| 11/22/2010 14:05:01 | 38.642 | 11/20/2010 21:09:01 | 26.862 |
| 11/22/2010 14:25:01 | 37.335 | 11/20/2010 21:29:01 | 26.862 |
| 11/22/2010 14:45:01 | 36.650 | 11/20/2010 21:49:01 | 26.862 |
| 11/22/2010 15:05:01 | 35.841 | 11/20/2010 22:09:01 | 26.862 |
| 11/22/2010 15:25:01 | 35.654 | 11/20/2010 22:29:01 | 26.862 |
| 11/22/2010 15:45:01 | 35.342 | 11/20/2010 22:49:01 | 26.862 |
| 11/22/2010 16:05:01 | 34.657 | 11/20/2010 23:09:01 | 26.800 |
| 11/22/2010 16:25:01 | 34.532 | 11/20/2010 23:29:01 | 26.800 |
| 11/22/2010 16:45:01 | 33.597 | 11/20/2010 23:49:01 | 26.800 |
| 11/22/2010 17:05:01 | 32.475 | 11/21/2010 00:09:01 | 26.800 |
| 11/22/2010 17:25:01 | 31.290 | 11/21/2010 00:29:01 | 26.800 |
| 11/22/2010 17:45:01 | 30.417 | 11/21/2010 00:49:01 | 26.800 |
| 11/22/2010 18:05:01 | 29.231 | 11/21/2010 01:09:01 | 26.800 |
| 11/22/2010 18:25:01 | 28.233 | 11/21/2010 01:29:01 | 26.738 |
| 11/22/2010 18:45:01 | 27.358 | 11/21/2010 01:49:01 | 26.738 |
| 11/22/2010 19:05:01 | 26.671 | 11/21/2010 02:09:01 | 26.738 |
| 11/22/2010 19:25:01 | 26.109 | 11/21/2010 02:29:01 | 26.738 |
| 11/22/2010 19:45:01 | 25.484 | 11/21/2010 02:49:01 | 26.738 |

|                     |        |                     |        |
|---------------------|--------|---------------------|--------|
| 11/22/2010 20:05:01 | 25.109 | 11/21/2010 03:09:01 | 26.738 |
| 11/22/2010 20:25:01 | 25.234 | 11/21/2010 03:29:01 | 26.675 |
| 11/22/2010 20:45:01 | 24.984 | 11/21/2010 03:49:01 | 26.675 |
| 11/22/2010 21:05:01 | 25.609 | 11/21/2010 04:09:01 | 26.675 |
| 11/22/2010 21:25:01 | 25.859 | 11/21/2010 04:29:01 | 26.675 |
| 11/22/2010 21:45:01 | 25.797 | 11/21/2010 04:49:01 | 26.675 |
| 11/22/2010 22:05:01 | 25.547 | 11/21/2010 05:09:01 | 26.675 |
| 11/22/2010 22:25:01 | 25.047 | 11/21/2010 05:29:01 | 26.613 |
| 11/22/2010 22:45:01 | 24.609 | 11/21/2010 05:49:01 | 26.613 |
| 11/22/2010 23:05:01 | 24.297 | 11/21/2010 06:09:01 | 26.613 |
| 11/22/2010 23:25:01 | 23.922 | 11/21/2010 06:29:01 | 26.550 |
| 11/22/2010 23:45:01 | 23.547 | 11/21/2010 06:49:01 | 26.550 |
| 11/23/2010 00:05:01 | 23.422 | 11/21/2010 07:09:01 | 26.488 |
| 11/23/2010 00:25:01 | 23.422 | 11/21/2010 07:29:01 | 26.488 |
| 11/23/2010 00:45:01 | 23.234 | 11/21/2010 07:49:01 | 26.425 |
| 11/23/2010 01:05:01 | 22.921 | 11/21/2010 08:09:01 | 26.425 |
| 11/23/2010 01:25:01 | 22.609 | 11/21/2010 08:29:01 | 26.363 |
| 11/23/2010 01:45:01 | 22.546 | 11/21/2010 08:49:01 | 26.363 |
| 11/23/2010 02:05:01 | 22.108 | 11/21/2010 09:09:01 | 26.300 |
| 11/23/2010 02:25:01 | 21.796 | 11/21/2010 09:29:01 | 26.300 |
| 11/23/2010 02:45:01 | 21.295 | 11/21/2010 09:49:01 | 26.300 |
| 11/23/2010 03:05:01 | 20.857 | 11/21/2010 10:09:01 | 26.238 |
| 11/23/2010 03:25:01 | 20.419 | 11/21/2010 10:29:01 | 26.238 |
| 11/23/2010 03:45:01 | 19.981 | 11/21/2010 10:49:01 | 26.238 |
| 11/23/2010 04:05:01 | 19.668 | 11/21/2010 11:09:01 | 26.238 |
| 11/23/2010 04:25:01 | 19.480 | 11/21/2010 11:29:01 | 26.238 |
| 11/23/2010 04:45:01 | 19.293 | 11/21/2010 11:49:01 | 26.238 |
| 11/23/2010 05:05:01 | 19.042 | 11/21/2010 12:09:01 | 26.238 |
| 11/23/2010 05:25:01 | 18.792 | 11/21/2010 12:29:01 | 26.238 |
| 11/23/2010 05:45:01 | 19.105 | 11/21/2010 12:49:01 | 26.238 |
| 11/23/2010 06:05:01 | 20.231 | 11/21/2010 13:09:01 | 26.238 |
| 11/23/2010 06:25:01 | 21.921 | 11/21/2010 13:29:01 | 26.238 |
| 11/23/2010 06:45:01 | 23.484 | 11/21/2010 13:49:01 | 26.300 |
| 11/23/2010 07:05:01 | 25.797 | 11/21/2010 14:09:01 | 26.300 |
| 11/23/2010 07:25:01 | 28.295 | 11/21/2010 14:29:01 | 26.300 |
| 11/23/2010 07:45:01 | 29.668 | 11/21/2010 14:49:01 | 26.363 |
| 11/23/2010 08:05:01 | 30.729 | 11/21/2010 15:09:01 | 26.363 |
| 11/23/2010 08:25:01 | 31.166 | 11/21/2010 15:29:01 | 26.363 |
| 11/23/2010 08:45:01 | 31.665 | 11/21/2010 15:49:01 | 26.425 |
| 11/23/2010 09:05:01 | 33.036 | 11/21/2010 16:09:01 | 26.425 |
| 11/23/2010 09:25:01 | 34.221 | 11/21/2010 16:29:01 | 26.425 |
| 11/23/2010 09:45:01 | 35.404 | 11/21/2010 16:49:01 | 26.488 |
| 11/23/2010 10:05:01 | 35.404 | 11/21/2010 17:09:01 | 26.488 |
| 11/23/2010 10:25:01 | 35.716 | 11/21/2010 17:29:01 | 26.550 |
| 11/23/2010 10:45:01 | 37.148 | 11/21/2010 17:49:01 | 26.550 |
| 11/23/2010 11:05:01 | 37.086 | 11/21/2010 18:09:01 | 26.550 |
| 11/23/2010 11:25:01 | 37.584 | 11/21/2010 18:29:01 | 26.550 |
| 11/23/2010 11:45:01 | 38.269 | 11/21/2010 18:49:01 | 26.613 |
| 11/23/2010 12:05:01 | 38.953 | 11/21/2010 19:09:01 | 26.613 |
| 11/23/2010 12:25:01 | 38.456 | 11/21/2010 19:29:01 | 26.613 |



|                     |        |                     |        |
|---------------------|--------|---------------------|--------|
| 11/23/2010 12:45:01 | 38.269 | 11/21/2010 19:49:01 | 26.613 |
| 11/23/2010 13:05:01 | 39.202 | 11/21/2010 20:09:01 | 26.613 |
| 11/23/2010 13:25:01 | 39.638 | 11/21/2010 20:29:01 | 26.613 |
| 11/23/2010 13:45:01 | 39.513 | 11/21/2010 20:49:01 | 26.613 |
| 11/23/2010 14:05:01 | 39.513 | 11/21/2010 21:09:01 | 26.613 |
| 11/23/2010 14:25:01 | 39.140 | 11/21/2010 21:29:01 | 26.613 |
| 11/23/2010 14:45:01 | 38.704 | 11/21/2010 21:49:01 | 26.613 |
| 11/23/2010 15:05:01 | 36.712 | 11/21/2010 22:09:01 | 26.613 |
| 11/23/2010 15:25:01 | 36.276 | 11/21/2010 22:29:01 | 26.613 |
| 11/23/2010 15:45:01 | 36.152 | 11/21/2010 22:49:01 | 26.613 |
| 11/23/2010 16:05:01 | 35.529 | 11/21/2010 23:09:01 | 26.550 |
| 11/23/2010 16:25:01 | 34.968 | 11/21/2010 23:29:01 | 26.550 |
| 11/23/2010 16:45:01 | 34.408 | 11/21/2010 23:49:01 | 26.550 |
| 11/23/2010 17:05:01 | 33.597 | 11/22/2010 00:09:01 | 26.550 |
| 11/23/2010 17:25:01 | 32.288 | 11/22/2010 00:29:01 | 26.550 |
| 11/23/2010 17:45:01 | 31.041 | 11/22/2010 00:49:01 | 26.488 |
| 11/23/2010 18:05:01 | 30.043 | 11/22/2010 01:09:01 | 26.488 |
| 11/23/2010 18:25:01 | 28.794 | 11/22/2010 01:29:01 | 26.488 |
| 11/23/2010 18:45:01 | 27.421 | 11/22/2010 01:49:01 | 26.488 |
| 11/23/2010 19:05:01 | 26.546 | 11/22/2010 02:09:01 | 26.488 |
| 11/23/2010 19:25:01 | 25.859 | 11/22/2010 02:29:01 | 26.488 |
| 11/23/2010 19:45:01 | 25.484 | 11/22/2010 02:49:01 | 26.425 |
| 11/23/2010 20:05:01 | 25.234 | 11/22/2010 03:09:01 | 26.425 |
| 11/23/2010 20:25:01 | 26.609 | 11/22/2010 03:29:01 | 26.425 |
| 11/23/2010 20:45:01 | 26.734 | 11/22/2010 03:49:01 | 26.425 |
| 11/23/2010 21:05:01 | 26.234 | 11/22/2010 04:09:01 | 26.425 |
| 11/23/2010 21:25:01 | 25.797 | 11/22/2010 04:29:01 | 26.363 |
| 11/23/2010 21:45:01 | 25.359 | 11/22/2010 04:49:01 | 26.363 |
| 11/23/2010 22:05:01 | 25.047 | 11/22/2010 05:09:01 | 26.363 |
| 11/23/2010 22:25:01 | 24.609 | 11/22/2010 05:29:01 | 26.363 |
| 11/23/2010 22:45:01 | 24.172 | 11/22/2010 05:49:01 | 26.363 |
| 11/23/2010 23:05:01 | 23.797 | 11/22/2010 06:09:01 | 26.300 |
| 11/23/2010 23:25:01 | 23.547 | 11/22/2010 06:29:01 | 26.300 |
| 11/23/2010 23:45:01 | 23.297 | 11/22/2010 06:49:01 | 26.300 |
| 11/24/2010 00:05:01 | 23.172 | 11/22/2010 07:09:01 | 26.300 |
| 11/24/2010 00:25:01 | 23.109 | 11/22/2010 07:29:01 | 26.300 |
| 11/24/2010 00:45:01 | 23.047 | 11/22/2010 07:49:01 | 26.238 |
| 11/24/2010 01:05:01 | 23.047 | 11/22/2010 08:09:01 | 26.238 |
| 11/24/2010 01:25:01 | 22.921 | 11/22/2010 08:29:01 | 26.238 |
| 11/24/2010 01:45:01 | 22.671 | 11/22/2010 08:49:01 | 26.238 |
| 11/24/2010 02:05:01 | 22.484 | 11/22/2010 09:09:01 | 26.238 |
| 11/24/2010 02:25:01 | 22.296 | 11/22/2010 09:29:01 | 26.238 |
| 11/24/2010 02:45:01 | 22.171 | 11/22/2010 09:49:01 | 26.238 |
| 11/24/2010 03:05:01 | 21.983 | 11/22/2010 10:09:01 | 26.238 |
| 11/24/2010 03:25:01 | 21.796 | 11/22/2010 10:29:01 | 26.238 |
| 11/24/2010 03:45:01 | 21.608 | 11/22/2010 10:49:01 | 26.238 |
| 11/24/2010 04:05:01 | 21.545 | 11/22/2010 11:09:01 | 26.238 |
| 11/24/2010 04:25:01 | 21.358 | 11/22/2010 11:29:01 | 26.300 |
| 11/24/2010 04:45:01 | 21.107 | 11/22/2010 11:49:01 | 26.300 |
| 11/24/2010 05:05:01 | 20.920 | 11/22/2010 12:09:01 | 26.363 |

|                     |        |                     |        |
|---------------------|--------|---------------------|--------|
| 11/24/2010 05:25:01 | 20.857 | 11/22/2010 12:29:01 | 26.363 |
| 11/24/2010 05:45:01 | 21.045 | 11/22/2010 12:49:01 | 26.425 |
| 11/24/2010 06:05:01 | 21.796 | 11/22/2010 13:09:01 | 26.425 |
| 11/24/2010 06:25:01 | 22.921 | 11/22/2010 13:29:01 | 26.488 |
| 11/24/2010 06:45:01 | 23.984 | 11/22/2010 13:49:01 | 26.550 |
| 11/24/2010 07:05:01 | 26.047 | 11/22/2010 14:09:01 | 26.550 |
| 11/24/2010 07:25:01 | 29.419 | 11/22/2010 14:29:01 | 26.613 |
| 11/24/2010 07:45:01 | 30.854 | 11/22/2010 14:49:01 | 26.675 |
| 11/24/2010 08:05:01 | 32.413 | 11/22/2010 15:09:01 | 26.738 |
| 11/24/2010 08:25:01 | 32.725 | 11/22/2010 15:29:01 | 26.800 |
| 11/24/2010 08:45:01 | 32.912 | 11/22/2010 15:49:01 | 26.862 |
| 11/24/2010 09:05:01 | 34.034 | 11/22/2010 16:09:01 | 26.862 |
| 11/24/2010 09:25:01 | 34.968 | 11/22/2010 16:29:01 | 26.925 |
| 11/24/2010 09:45:01 | 36.526 | 11/22/2010 16:49:01 | 26.987 |
| 11/24/2010 10:05:01 | 36.712 | 11/22/2010 17:09:01 | 26.987 |
| 11/24/2010 10:25:01 | 36.899 | 11/22/2010 17:29:01 | 27.050 |
| 11/24/2010 10:45:01 | 37.335 | 11/22/2010 17:49:01 | 27.050 |
| 11/24/2010 11:05:01 | 36.526 | 11/22/2010 18:09:01 | 27.112 |
| 11/24/2010 11:25:01 | 38.020 | 11/22/2010 18:29:01 | 27.112 |
| 11/24/2010 11:45:01 | 37.522 | 11/22/2010 18:49:01 | 27.175 |
| 11/24/2010 12:05:01 | 36.526 | 11/22/2010 19:09:01 | 27.175 |
| 11/24/2010 12:25:01 | 36.962 | 11/22/2010 19:29:01 | 27.175 |
| 11/24/2010 12:45:01 | 37.958 | 11/22/2010 19:49:01 | 27.175 |
| 11/24/2010 13:05:01 | 39.451 | 11/22/2010 20:09:01 | 27.175 |
| 11/24/2010 13:25:01 | 37.148 | 11/22/2010 20:29:01 | 27.175 |
| 11/24/2010 13:45:01 | 38.767 | 11/22/2010 20:49:01 | 27.175 |
| 11/24/2010 14:05:01 | 39.700 | 11/22/2010 21:09:01 | 27.237 |
| 11/24/2010 14:25:01 | 39.638 | 11/22/2010 21:29:01 | 27.175 |
| 11/24/2010 14:45:01 | 39.078 | 11/22/2010 21:49:01 | 27.175 |
| 11/24/2010 15:05:01 | 37.522 | 11/22/2010 22:09:01 | 27.175 |
| 11/24/2010 15:25:01 | 36.027 | 11/22/2010 22:29:01 | 27.175 |
| 11/24/2010 15:45:01 | 35.965 | 11/22/2010 22:49:01 | 27.175 |
| 11/24/2010 16:05:01 | 36.401 | 11/22/2010 23:09:01 | 27.175 |
| 11/24/2010 16:25:01 | 35.529 | 11/22/2010 23:29:01 | 27.175 |
| 11/24/2010 16:45:01 | 34.719 | 11/22/2010 23:49:01 | 27.175 |
| 11/24/2010 17:05:01 | 33.784 | 11/23/2010 00:09:01 | 27.175 |
| 11/24/2010 17:25:01 | 33.223 | 11/23/2010 00:29:01 | 27.112 |
| 11/24/2010 17:45:01 | 32.288 | 11/23/2010 00:49:01 | 27.112 |
| 11/24/2010 18:05:01 | 31.103 | 11/23/2010 01:09:01 | 27.112 |
| 11/24/2010 18:25:01 | 29.481 | 11/23/2010 01:29:01 | 27.112 |
| 11/24/2010 18:45:01 | 28.919 | 11/23/2010 01:49:01 | 27.112 |
| 11/24/2010 19:05:01 | 28.670 | 11/23/2010 02:09:01 | 27.112 |
| 11/24/2010 19:25:01 | 28.170 | 11/23/2010 02:29:01 | 27.050 |
| 11/24/2010 19:45:01 | 27.546 | 11/23/2010 02:49:01 | 27.050 |
| 11/24/2010 20:05:01 | 26.859 | 11/23/2010 03:09:01 | 27.050 |
| 11/24/2010 20:25:01 | 26.484 | 11/23/2010 03:29:01 | 26.987 |
| 11/24/2010 20:45:01 | 25.984 | 11/23/2010 03:49:01 | 26.987 |
| 11/24/2010 21:05:01 | 25.297 | 11/23/2010 04:09:01 | 26.987 |
| 11/24/2010 21:25:01 | 24.922 | 11/23/2010 04:29:01 | 26.987 |
| 11/24/2010 21:45:01 | 24.609 | 11/23/2010 04:49:01 | 26.925 |

|                     |        |                     |        |
|---------------------|--------|---------------------|--------|
| 11/24/2010 22:05:01 | 24.359 | 11/23/2010 05:09:01 | 26.925 |
| 11/24/2010 22:25:01 | 24.484 | 11/23/2010 05:29:01 | 26.925 |
| 11/24/2010 22:45:01 | 24.609 | 11/23/2010 05:49:01 | 26.925 |
| 11/24/2010 23:05:01 | 24.984 | 11/23/2010 06:09:01 | 26.862 |
| 11/24/2010 23:25:01 | 24.859 | 11/23/2010 06:29:01 | 26.862 |
| 11/24/2010 23:45:01 | 24.672 | 11/23/2010 06:49:01 | 26.862 |
| 11/25/2010 00:05:01 | 24.484 | 11/23/2010 07:09:01 | 26.800 |
| 11/25/2010 00:25:01 | 24.234 | 11/23/2010 07:29:01 | 26.800 |
| 11/25/2010 00:45:01 | 23.859 | 11/23/2010 07:49:01 | 26.800 |
| 11/25/2010 01:05:01 | 23.484 | 11/23/2010 08:09:01 | 26.738 |
| 11/25/2010 01:25:01 | 23.422 | 11/23/2010 08:29:01 | 26.738 |
| 11/25/2010 01:45:01 | 23.359 | 11/23/2010 08:49:01 | 26.738 |
| 11/25/2010 02:05:01 | 23.109 | 11/23/2010 09:09:01 | 26.675 |
| 11/25/2010 02:25:01 | 23.047 | 11/23/2010 09:29:01 | 26.675 |
| 11/25/2010 02:45:01 | 22.859 | 11/23/2010 09:49:01 | 26.675 |
| 11/25/2010 03:05:01 | 22.984 | 11/23/2010 10:09:01 | 26.675 |
| 11/25/2010 03:25:01 | 23.047 | 11/23/2010 10:29:01 | 26.675 |
| 11/25/2010 03:45:01 | 23.234 | 11/23/2010 10:49:01 | 26.675 |
| 11/25/2010 04:05:01 | 23.547 | 11/23/2010 11:09:01 | 26.675 |
| 11/25/2010 04:25:01 | 23.547 | 11/23/2010 11:29:01 | 26.675 |
| 11/25/2010 04:45:01 | 23.734 | 11/23/2010 11:49:01 | 26.675 |
| 11/25/2010 05:05:01 | 23.859 | 11/23/2010 12:09:01 | 26.675 |
| 11/25/2010 05:25:01 | 23.922 | 11/23/2010 12:29:01 | 26.738 |
| 11/25/2010 05:45:01 | 23.797 | 11/23/2010 12:49:01 | 26.738 |
| 11/25/2010 06:05:01 | 23.797 | 11/23/2010 13:09:01 | 26.800 |
| 11/25/2010 06:25:01 | 23.797 | 11/23/2010 13:29:01 | 26.800 |
| 11/25/2010 06:45:01 | 23.734 | 11/23/2010 13:49:01 | 26.862 |
| 11/25/2010 07:05:01 | 23.609 | 11/23/2010 14:09:01 | 26.925 |
| 11/25/2010 07:25:01 | 23.609 | 11/23/2010 14:29:01 | 26.925 |
| 11/25/2010 07:45:01 | 23.672 | 11/23/2010 14:49:01 | 26.987 |
| 11/25/2010 08:05:01 | 23.859 | 11/23/2010 15:09:01 | 27.050 |
| 11/25/2010 08:25:01 | 24.422 | 11/23/2010 15:29:01 | 27.112 |
| 11/25/2010 08:45:01 | 25.547 | 11/23/2010 15:49:01 | 27.112 |
| 11/25/2010 09:05:01 | 26.359 | 11/23/2010 16:09:01 | 27.175 |
| 11/25/2010 09:25:01 | 27.046 | 11/23/2010 16:29:01 | 27.237 |
| 11/25/2010 09:45:01 | 28.045 | 11/23/2010 16:49:01 | 27.237 |
| 11/25/2010 10:05:01 | 29.231 | 11/23/2010 17:09:01 | 27.300 |
| 11/25/2010 10:25:01 | 30.105 | 11/23/2010 17:29:01 | 27.300 |
| 11/25/2010 10:45:01 | 30.542 | 11/23/2010 17:49:01 | 27.362 |
| 11/25/2010 11:05:01 | 31.540 | 11/23/2010 18:09:01 | 27.362 |
| 11/25/2010 11:25:01 | 32.288 | 11/23/2010 18:29:01 | 27.425 |
| 11/25/2010 11:45:01 | 32.413 | 11/23/2010 18:49:01 | 27.425 |
| 11/25/2010 12:05:01 | 32.163 | 11/23/2010 19:09:01 | 27.425 |
| 11/25/2010 12:25:01 | 32.725 | 11/23/2010 19:29:01 | 27.425 |
| 11/25/2010 12:45:01 | 33.660 | 11/23/2010 19:49:01 | 27.425 |
| 11/25/2010 13:05:01 | 33.722 | 11/23/2010 20:09:01 | 27.425 |
| 11/25/2010 13:25:01 | 33.099 | 11/23/2010 20:29:01 | 27.425 |
| 11/25/2010 13:45:01 | 32.600 | 11/23/2010 20:49:01 | 27.425 |
| 11/25/2010 14:05:01 | 32.413 | 11/23/2010 21:09:01 | 27.425 |
| 11/25/2010 14:25:01 | 31.852 | 11/23/2010 21:29:01 | 27.425 |

|                     |        |                     |        |
|---------------------|--------|---------------------|--------|
| 11/25/2010 14:45:01 | 31.477 | 11/23/2010 21:49:01 | 27.425 |
| 11/25/2010 15:05:01 | 31.290 | 11/23/2010 22:09:01 | 27.425 |
| 11/25/2010 15:25:01 | 30.916 | 11/23/2010 22:29:01 | 27.425 |
| 11/25/2010 15:45:01 | 30.667 | 11/23/2010 22:49:01 | 27.425 |
| 11/25/2010 16:05:01 | 30.479 | 11/23/2010 23:09:01 | 27.362 |
| 11/25/2010 16:25:01 | 30.230 | 11/23/2010 23:29:01 | 27.362 |
| 11/25/2010 16:45:01 | 30.043 | 11/23/2010 23:49:01 | 27.362 |
| 11/25/2010 17:05:01 | 29.668 | 11/24/2010 00:09:01 | 27.362 |
| 11/25/2010 17:25:01 | 29.294 | 11/24/2010 00:29:01 | 27.300 |
| 11/25/2010 17:45:01 | 28.670 | 11/24/2010 00:49:01 | 27.300 |
| 11/25/2010 18:05:01 | 28.045 | 11/24/2010 01:09:01 | 27.300 |
| 11/25/2010 18:25:01 | 27.046 | 11/24/2010 01:29:01 | 27.300 |
| 11/25/2010 18:45:01 | 26.172 | 11/24/2010 01:49:01 | 27.300 |
| 11/25/2010 19:05:01 | 25.672 | 11/24/2010 02:09:01 | 27.237 |
| 11/25/2010 19:25:01 | 25.672 | 11/24/2010 02:29:01 | 27.237 |
| 11/25/2010 19:45:01 | 25.422 | 11/24/2010 02:49:01 | 27.237 |
| 11/25/2010 20:05:01 | 25.297 | 11/24/2010 03:09:01 | 27.175 |
| 11/25/2010 20:25:01 | 25.109 | 11/24/2010 03:29:01 | 27.175 |
| 11/25/2010 20:45:01 | 24.859 | 11/24/2010 03:49:01 | 27.175 |
| 11/25/2010 21:05:01 | 24.422 | 11/24/2010 04:09:01 | 27.175 |
| 11/25/2010 21:25:01 | 24.047 | 11/24/2010 04:29:01 | 27.112 |
| 11/25/2010 21:45:01 | 23.547 | 11/24/2010 04:49:01 | 27.112 |
| 11/25/2010 22:05:01 | 23.422 | 11/24/2010 05:09:01 | 27.112 |
| 11/25/2010 22:25:01 | 23.297 | 11/24/2010 05:29:01 | 27.050 |
| 11/25/2010 22:45:01 | 23.172 | 11/24/2010 05:49:01 | 27.050 |
| 11/25/2010 23:05:01 | 22.859 | 11/24/2010 06:09:01 | 27.050 |
| 11/25/2010 23:25:01 | 22.421 | 11/24/2010 06:29:01 | 26.987 |
| 11/25/2010 23:45:01 | 22.108 | 11/24/2010 06:49:01 | 26.987 |
| 11/26/2010 00:05:01 | 22.359 | 11/24/2010 07:09:01 | 26.987 |
| 11/26/2010 00:25:01 | 22.421 | 11/24/2010 07:29:01 | 26.925 |
| 11/26/2010 00:45:01 | 22.546 | 11/24/2010 07:49:01 | 26.925 |
| 11/26/2010 01:05:01 | 22.609 | 11/24/2010 08:09:01 | 26.925 |
| 11/26/2010 01:25:01 | 22.609 | 11/24/2010 08:29:01 | 26.925 |
| 11/26/2010 01:45:01 | 22.484 | 11/24/2010 08:49:01 | 26.862 |
| 11/26/2010 02:05:01 | 22.359 | 11/24/2010 09:09:01 | 26.862 |
| 11/26/2010 02:25:01 | 22.921 | 11/24/2010 09:29:01 | 26.862 |
| 11/26/2010 02:45:01 | 23.297 | 11/24/2010 09:49:01 | 26.862 |
| 11/26/2010 03:05:01 | 23.422 | 11/24/2010 10:09:01 | 26.862 |
| 11/26/2010 03:25:01 | 23.359 | 11/24/2010 10:29:01 | 26.862 |
| 11/26/2010 03:45:01 | 23.359 | 11/24/2010 10:49:01 | 26.862 |
| 11/26/2010 04:05:01 | 23.359 | 11/24/2010 11:09:01 | 26.862 |
| 11/26/2010 04:25:01 | 23.484 | 11/24/2010 11:29:01 | 26.862 |
| 11/26/2010 04:45:01 | 23.609 | 11/24/2010 11:49:01 | 26.862 |
| 11/26/2010 05:05:01 | 23.547 | 11/24/2010 12:09:01 | 26.862 |
| 11/26/2010 05:25:01 | 23.297 | 11/24/2010 12:29:01 | 26.925 |
| 11/26/2010 05:45:01 | 23.297 | 11/24/2010 12:49:01 | 26.925 |
| 11/26/2010 06:05:01 | 23.234 | 11/24/2010 13:09:01 | 26.925 |
| 11/26/2010 06:25:01 | 22.984 | 11/24/2010 13:29:01 | 26.987 |
| 11/26/2010 06:45:01 | 21.733 | 11/24/2010 13:49:01 | 27.050 |
| 11/26/2010 07:05:01 | 21.107 | 11/24/2010 14:09:01 | 27.050 |

|                     |        |                     |        |
|---------------------|--------|---------------------|--------|
| 11/26/2010 07:25:01 | 21.358 | 11/24/2010 14:29:01 | 27.112 |
| 11/26/2010 07:45:01 | 21.796 | 11/24/2010 14:49:01 | 27.112 |
| 11/26/2010 08:05:01 | 22.108 | 11/24/2010 15:09:01 | 27.175 |
| 11/26/2010 08:25:01 | 22.859 | 11/24/2010 15:29:01 | 27.237 |
| 11/26/2010 08:45:01 | 22.984 | 11/24/2010 15:49:01 | 27.237 |
| 11/26/2010 09:05:01 | 23.984 | 11/24/2010 16:09:01 | 27.300 |
| 11/26/2010 09:25:01 | 25.359 | 11/24/2010 16:29:01 | 27.300 |
| 11/26/2010 09:45:01 | 26.234 | 11/24/2010 16:49:01 | 27.362 |
| 11/26/2010 10:05:01 | 27.046 | 11/24/2010 17:09:01 | 27.362 |
| 11/26/2010 10:25:01 | 30.791 | 11/24/2010 17:29:01 | 27.425 |
| 11/26/2010 10:45:01 | 32.351 | 11/24/2010 17:49:01 | 27.425 |
| 11/26/2010 11:05:01 | 33.473 | 11/24/2010 18:09:01 | 27.425 |
| 11/26/2010 11:25:01 | 34.657 | 11/24/2010 18:29:01 | 27.487 |
| 11/26/2010 11:45:01 | 33.223 | 11/24/2010 18:49:01 | 27.487 |
| 11/26/2010 12:05:01 | 32.662 | 11/24/2010 19:09:01 | 27.487 |
| 11/26/2010 12:25:01 | 31.540 | 11/24/2010 19:29:01 | 27.487 |
| 11/26/2010 12:45:01 | 32.163 | 11/24/2010 19:49:01 | 27.550 |
| 11/26/2010 13:05:01 | 36.152 | 11/24/2010 20:09:01 | 27.550 |
| 11/26/2010 13:25:01 | 33.971 | 11/24/2010 20:29:01 | 27.550 |
| 11/26/2010 13:45:01 | 32.475 | 11/24/2010 20:49:01 | 27.550 |
| 11/26/2010 14:05:01 | 32.101 | 11/24/2010 21:09:01 | 27.550 |
| 11/26/2010 14:25:01 | 33.722 | 11/24/2010 21:29:01 | 27.550 |
| 11/26/2010 14:45:01 | 35.155 | 11/24/2010 21:49:01 | 27.487 |
| 11/26/2010 15:05:01 | 34.781 | 11/24/2010 22:09:01 | 27.487 |
| 11/26/2010 15:25:01 | 34.283 | 11/24/2010 22:29:01 | 27.487 |
| 11/26/2010 15:45:01 | 33.473 | 11/24/2010 22:49:01 | 27.487 |
| 11/26/2010 16:05:01 | 33.410 | 11/24/2010 23:09:01 | 27.487 |
| 11/26/2010 16:25:01 | 32.787 | 11/24/2010 23:29:01 | 27.487 |
| 11/26/2010 16:45:01 | 32.101 | 11/24/2010 23:49:01 | 27.487 |
| 11/26/2010 17:05:01 | 31.290 | 11/25/2010 00:09:01 | 27.425 |
| 11/26/2010 17:25:01 | 30.417 | 11/25/2010 00:29:01 | 27.425 |
| 11/26/2010 17:45:01 | 29.481 | 11/25/2010 00:49:01 | 27.425 |
| 11/26/2010 18:05:01 | 28.482 | 11/25/2010 01:09:01 | 27.425 |
| 11/26/2010 18:25:01 | 27.608 | 11/25/2010 01:29:01 | 27.362 |
| 11/26/2010 18:45:01 | 26.984 | 11/25/2010 01:49:01 | 27.362 |
| 11/26/2010 19:05:01 | 26.546 | 11/25/2010 02:09:01 | 27.362 |
| 11/26/2010 19:25:01 | 25.984 | 11/25/2010 02:29:01 | 27.362 |
| 11/26/2010 19:45:01 | 25.547 | 11/25/2010 02:49:01 | 27.362 |
| 11/26/2010 20:05:01 | 25.172 | 11/25/2010 03:09:01 | 27.300 |
| 11/26/2010 20:25:01 | 24.797 | 11/25/2010 03:29:01 | 27.300 |
| 11/26/2010 20:45:01 | 24.297 | 11/25/2010 03:49:01 | 27.300 |
| 11/26/2010 21:05:01 | 23.922 | 11/25/2010 04:09:01 | 27.300 |
| 11/26/2010 21:25:01 | 23.672 | 11/25/2010 04:29:01 | 27.237 |
| 11/26/2010 21:45:01 | 23.547 | 11/25/2010 04:49:01 | 27.237 |
| 11/26/2010 22:05:01 | 23.297 | 11/25/2010 05:09:01 | 27.237 |
| 11/26/2010 22:25:01 | 23.047 | 11/25/2010 05:29:01 | 27.237 |
| 11/26/2010 22:45:01 | 22.734 | 11/25/2010 05:49:01 | 27.175 |
| 11/26/2010 23:05:01 | 22.421 | 11/25/2010 06:09:01 | 27.175 |
| 11/26/2010 23:25:01 | 22.171 | 11/25/2010 06:29:01 | 27.175 |
| 11/26/2010 23:45:01 | 22.046 | 11/25/2010 06:49:01 | 27.175 |

|                     |        |                     |        |
|---------------------|--------|---------------------|--------|
| 11/27/2010 00:05:01 | 21.921 | 11/25/2010 07:09:01 | 27.175 |
| 11/27/2010 00:25:01 | 21.796 | 11/25/2010 07:29:01 | 27.112 |
| 11/27/2010 00:45:01 | 21.796 | 11/25/2010 07:49:01 | 27.112 |
| 11/27/2010 01:05:01 | 22.108 | 11/25/2010 08:09:01 | 27.112 |
| 11/27/2010 01:25:01 | 22.296 | 11/25/2010 08:29:01 | 27.050 |
| 11/27/2010 01:45:01 | 22.171 | 11/25/2010 08:49:01 | 27.050 |
| 11/27/2010 02:05:01 | 22.108 | 11/25/2010 09:09:01 | 27.050 |
| 11/27/2010 02:25:01 | 21.983 | 11/25/2010 09:29:01 | 27.050 |
| 11/27/2010 02:45:01 | 21.796 | 11/25/2010 09:49:01 | 27.050 |
| 11/27/2010 03:05:01 | 21.608 | 11/25/2010 10:09:01 | 26.987 |
| 11/27/2010 03:25:01 | 21.545 | 11/25/2010 10:29:01 | 26.987 |
| 11/27/2010 03:45:01 | 21.358 | 11/25/2010 10:49:01 | 26.987 |
| 11/27/2010 04:05:01 | 21.233 | 11/25/2010 11:09:01 | 26.987 |
| 11/27/2010 04:25:01 | 21.107 | 11/25/2010 11:29:01 | 26.987 |
| 11/27/2010 04:45:01 | 21.170 | 11/25/2010 11:49:01 | 26.987 |
| 11/27/2010 05:05:01 | 21.483 | 11/25/2010 12:09:01 | 26.987 |
| 11/27/2010 05:25:01 | 21.671 | 11/25/2010 12:29:01 | 26.987 |
| 11/27/2010 05:45:01 | 22.046 | 11/25/2010 12:49:01 | 26.987 |
| 11/27/2010 06:05:01 | 22.421 | 11/25/2010 13:09:01 | 26.987 |
| 11/27/2010 06:25:01 | 23.797 | 11/25/2010 13:29:01 | 26.987 |
| 11/27/2010 06:45:01 | 24.359 | 11/25/2010 13:49:01 | 26.987 |
| 11/27/2010 07:05:01 | 24.547 | 11/25/2010 14:09:01 | 26.987 |
| 11/27/2010 07:25:01 | 24.422 | 11/25/2010 14:29:01 | 26.987 |
| 11/27/2010 07:45:01 | 24.484 | 11/25/2010 14:49:01 | 26.987 |
| 11/27/2010 08:05:01 | 25.484 | 11/25/2010 15:09:01 | 27.050 |
| 11/27/2010 08:25:01 | 28.295 | 11/25/2010 15:29:01 | 27.050 |
| 11/27/2010 08:45:01 | 30.167 | 11/25/2010 15:49:01 | 27.050 |
| 11/27/2010 09:05:01 | 30.479 | 11/25/2010 16:09:01 | 27.050 |
| 11/27/2010 09:25:01 | 29.731 | 11/25/2010 16:29:01 | 27.050 |
| 11/27/2010 09:45:01 | 32.351 | 11/25/2010 16:49:01 | 27.112 |
| 11/27/2010 10:05:01 | 31.477 | 11/25/2010 17:09:01 | 27.112 |
| 11/27/2010 10:25:01 | 34.221 | 11/25/2010 17:29:01 | 27.112 |
| 11/27/2010 10:45:01 | 34.595 | 11/25/2010 17:49:01 | 27.112 |
| 11/27/2010 11:05:01 | 33.535 | 11/25/2010 18:09:01 | 27.112 |
| 11/27/2010 11:25:01 | 33.099 | 11/25/2010 18:29:01 | 27.112 |
| 11/27/2010 11:45:01 | 34.283 | 11/25/2010 18:49:01 | 27.112 |
| 11/27/2010 12:05:01 | 34.844 | 11/25/2010 19:09:01 | 27.112 |
| 11/27/2010 12:25:01 | 33.847 | 11/25/2010 19:29:01 | 27.175 |
| 11/27/2010 12:45:01 | 33.784 | 11/25/2010 19:49:01 | 27.112 |
| 11/27/2010 13:05:01 | 34.532 | 11/25/2010 20:09:01 | 27.112 |
| 11/27/2010 13:25:01 | 35.093 | 11/25/2010 20:29:01 | 27.112 |
| 11/27/2010 13:45:01 | 34.844 | 11/25/2010 20:49:01 | 27.112 |
| 11/27/2010 14:05:01 | 35.778 | 11/25/2010 21:09:01 | 27.112 |
| 11/27/2010 14:25:01 | 35.404 | 11/25/2010 21:29:01 | 27.112 |
| 11/27/2010 14:45:01 | 35.778 | 11/25/2010 21:49:01 | 27.112 |
| 11/27/2010 15:05:01 | 34.470 | 11/25/2010 22:09:01 | 27.112 |
| 11/27/2010 15:25:01 | 33.597 | 11/25/2010 22:29:01 | 27.112 |
| 11/27/2010 15:45:01 | 33.286 | 11/25/2010 22:49:01 | 27.112 |
| 11/27/2010 16:05:01 | 32.725 | 11/25/2010 23:09:01 | 27.112 |
| 11/27/2010 16:25:01 | 32.912 | 11/25/2010 23:29:01 | 27.112 |

|                     |        |                     |        |
|---------------------|--------|---------------------|--------|
| 11/27/2010 16:45:01 | 32.600 | 11/25/2010 23:49:01 | 27.050 |
| 11/27/2010 17:05:01 | 31.727 | 11/26/2010 00:09:01 | 27.050 |
| 11/27/2010 17:25:01 | 30.167 | 11/26/2010 00:29:01 | 27.050 |
| 11/27/2010 17:45:01 | 29.419 | 11/26/2010 00:49:01 | 27.050 |
| 11/27/2010 18:05:01 | 28.732 | 11/26/2010 01:09:01 | 27.050 |
| 11/27/2010 18:25:01 | 27.920 | 11/26/2010 01:29:01 | 27.050 |
| 11/27/2010 18:45:01 | 27.233 | 11/26/2010 01:49:01 | 26.987 |
| 11/27/2010 19:05:01 | 26.671 | 11/26/2010 02:09:01 | 26.987 |
| 11/27/2010 19:25:01 | 26.234 | 11/26/2010 02:29:01 | 26.987 |
| 11/27/2010 19:45:01 | 25.859 | 11/26/2010 02:49:01 | 26.987 |
| 11/27/2010 20:05:01 | 25.484 | 11/26/2010 03:09:01 | 26.925 |
| 11/27/2010 20:25:01 | 25.172 | 11/26/2010 03:29:01 | 26.925 |
| 11/27/2010 20:45:01 | 25.047 | 11/26/2010 03:49:01 | 26.925 |
| 11/27/2010 21:05:01 | 24.984 | 11/26/2010 04:09:01 | 26.925 |
| 11/27/2010 21:25:01 | 24.672 | 11/26/2010 04:29:01 | 26.925 |
| 11/27/2010 21:45:01 | 24.297 | 11/26/2010 04:49:01 | 26.862 |
| 11/27/2010 22:05:01 | 23.922 | 11/26/2010 05:09:01 | 26.862 |
| 11/27/2010 22:25:01 | 23.609 | 11/26/2010 05:29:01 | 26.862 |
| 11/27/2010 22:45:01 | 23.359 | 11/26/2010 05:49:01 | 26.862 |
| 11/27/2010 23:05:01 | 23.172 | 11/26/2010 06:09:01 | 26.800 |
| 11/27/2010 23:25:01 | 23.172 | 11/26/2010 06:29:01 | 26.800 |
| 11/27/2010 23:45:01 | 23.297 | 11/26/2010 06:49:01 | 26.800 |
| 11/28/2010 00:05:01 | 23.359 | 11/26/2010 07:09:01 | 26.800 |
| 11/28/2010 00:25:01 | 23.359 | 11/26/2010 07:29:01 | 26.800 |
| 11/28/2010 00:45:01 | 23.672 | 11/26/2010 07:49:01 | 26.800 |
| 11/28/2010 01:05:01 | 23.609 | 11/26/2010 08:09:01 | 26.738 |
| 11/28/2010 01:25:01 | 23.422 | 11/26/2010 08:29:01 | 26.738 |
| 11/28/2010 01:45:01 | 23.234 | 11/26/2010 08:49:01 | 26.738 |
| 11/28/2010 02:05:01 | 23.109 | 11/26/2010 09:09:01 | 26.738 |
| 11/28/2010 02:25:01 | 23.047 | 11/26/2010 09:29:01 | 26.738 |
| 11/28/2010 02:45:01 | 22.984 | 11/26/2010 09:49:01 | 26.675 |
| 11/28/2010 03:05:01 | 22.796 | 11/26/2010 10:09:01 | 26.675 |
| 11/28/2010 03:25:01 | 22.859 | 11/26/2010 10:29:01 | 26.675 |
| 11/28/2010 03:45:01 | 22.921 | 11/26/2010 10:49:01 | 26.675 |
| 11/28/2010 04:05:01 | 22.921 | 11/26/2010 11:09:01 | 26.613 |
| 11/28/2010 04:25:01 | 22.734 | 11/26/2010 11:29:01 | 26.613 |
| 11/28/2010 04:45:01 | 22.921 | 11/26/2010 11:49:01 | 26.613 |
| 11/28/2010 05:05:01 | 23.109 | 11/26/2010 12:09:01 | 26.613 |
| 11/28/2010 05:25:01 | 23.047 | 11/26/2010 12:29:01 | 26.613 |
| 11/28/2010 05:45:01 | 22.984 | 11/26/2010 12:49:01 | 26.675 |
| 11/28/2010 06:05:01 | 23.547 | 11/26/2010 13:09:01 | 26.675 |
| 11/28/2010 06:25:01 | 24.297 | 11/26/2010 13:29:01 | 26.675 |
| 11/28/2010 06:45:01 | 24.859 | 11/26/2010 13:49:01 | 26.738 |
| 11/28/2010 07:05:01 | 26.172 | 11/26/2010 14:09:01 | 26.738 |
| 11/28/2010 07:25:01 | 25.984 | 11/26/2010 14:29:01 | 26.800 |
| 11/28/2010 07:45:01 | 26.297 | 11/26/2010 14:49:01 | 26.800 |
| 11/28/2010 08:05:01 | 26.859 | 11/26/2010 15:09:01 | 26.862 |
| 11/28/2010 08:25:01 | 27.733 | 11/26/2010 15:29:01 | 26.862 |
| 11/28/2010 08:45:01 | 29.419 | 11/26/2010 15:49:01 | 26.862 |
| 11/28/2010 09:05:01 | 30.355 | 11/26/2010 16:09:01 | 26.925 |

|                     |        |                     |        |
|---------------------|--------|---------------------|--------|
| 11/28/2010 09:25:01 | 32.226 | 11/26/2010 16:29:01 | 26.925 |
| 11/28/2010 09:45:01 | 34.034 | 11/26/2010 16:49:01 | 26.987 |
| 11/28/2010 10:05:01 | 34.408 | 11/26/2010 17:09:01 | 26.987 |
| 11/28/2010 10:25:01 | 34.844 | 11/26/2010 17:29:01 | 26.987 |
| 11/28/2010 10:45:01 | 34.906 | 11/26/2010 17:49:01 | 27.050 |
| 11/28/2010 11:05:01 | 34.844 | 11/26/2010 18:09:01 | 27.050 |
| 11/28/2010 11:25:01 | 33.784 | 11/26/2010 18:29:01 | 27.050 |
| 11/28/2010 11:45:01 | 32.787 | 11/26/2010 18:49:01 | 27.112 |
| 11/28/2010 12:05:01 | 34.345 | 11/26/2010 19:09:01 | 27.112 |
| 11/28/2010 12:25:01 | 36.837 | 11/26/2010 19:29:01 | 27.112 |
| 11/28/2010 12:45:01 | 35.529 | 11/26/2010 19:49:01 | 27.112 |
| 11/28/2010 13:05:01 | 35.778 | 11/26/2010 20:09:01 | 27.112 |
| 11/28/2010 13:25:01 | 35.529 | 11/26/2010 20:29:01 | 27.112 |
| 11/28/2010 13:45:01 | 35.404 | 11/26/2010 20:49:01 | 27.112 |
| 11/28/2010 14:05:01 | 37.273 | 11/26/2010 21:09:01 | 27.112 |
| 11/28/2010 14:25:01 | 35.654 | 11/26/2010 21:29:01 | 27.112 |
| 11/28/2010 14:45:01 | 33.597 | 11/26/2010 21:49:01 | 27.112 |
| 11/28/2010 15:05:01 | 32.475 | 11/26/2010 22:09:01 | 27.112 |
| 11/28/2010 15:25:01 | 33.847 | 11/26/2010 22:29:01 | 27.112 |
| 11/28/2010 15:45:01 | 34.345 | 11/26/2010 22:49:01 | 27.112 |
| 11/28/2010 16:05:01 | 34.345 | 11/26/2010 23:09:01 | 27.112 |
| 11/28/2010 16:25:01 | 33.410 | 11/26/2010 23:29:01 | 27.112 |
| 11/28/2010 16:45:01 | 32.475 | 11/26/2010 23:49:01 | 27.112 |
| 11/28/2010 17:05:01 | 31.290 | 11/27/2010 00:09:01 | 27.050 |
| 11/28/2010 17:25:01 | 30.230 | 11/27/2010 00:29:01 | 27.050 |
| 11/28/2010 17:45:01 | 29.356 | 11/27/2010 00:49:01 | 27.050 |
| 11/28/2010 18:05:01 | 28.545 | 11/27/2010 01:09:01 | 27.050 |
| 11/28/2010 18:25:01 | 27.858 | 11/27/2010 01:29:01 | 27.050 |
| 11/28/2010 18:45:01 | 27.358 | 11/27/2010 01:49:01 | 26.987 |
| 11/28/2010 19:05:01 | 26.921 | 11/27/2010 02:09:01 | 26.987 |
| 11/28/2010 19:25:01 | 26.609 | 11/27/2010 02:29:01 | 26.987 |
| 11/28/2010 19:45:01 | 26.297 | 11/27/2010 02:49:01 | 26.987 |
| 11/28/2010 20:05:01 | 25.672 | 11/27/2010 03:09:01 | 26.925 |
| 11/28/2010 20:25:01 | 25.047 | 11/27/2010 03:29:01 | 26.925 |
| 11/28/2010 20:45:01 | 24.547 | 11/27/2010 03:49:01 | 26.925 |
| 11/28/2010 21:05:01 | 24.109 | 11/27/2010 04:09:01 | 26.925 |
| 11/28/2010 21:25:01 | 23.734 | 11/27/2010 04:29:01 | 26.925 |
| 11/28/2010 21:45:01 | 23.484 | 11/27/2010 04:49:01 | 26.862 |
| 11/28/2010 22:05:01 | 23.109 | 11/27/2010 05:09:01 | 26.862 |
| 11/28/2010 22:25:01 | 22.921 | 11/27/2010 05:29:01 | 26.862 |
| 11/28/2010 22:45:01 | 22.671 | 11/27/2010 05:49:01 | 26.800 |
| 11/28/2010 23:05:01 | 22.546 | 11/27/2010 06:09:01 | 26.800 |
| 11/28/2010 23:25:01 | 22.359 | 11/27/2010 06:29:01 | 26.800 |
| 11/28/2010 23:45:01 | 22.234 | 11/27/2010 06:49:01 | 26.800 |
| 11/29/2010 00:05:01 | 22.108 | 11/27/2010 07:09:01 | 26.738 |
| 11/29/2010 00:25:01 | 22.234 | 11/27/2010 07:29:01 | 26.738 |
| 11/29/2010 00:45:01 | 22.484 | 11/27/2010 07:49:01 | 26.738 |
| 11/29/2010 01:05:01 | 22.609 | 11/27/2010 08:09:01 | 26.738 |
| 11/29/2010 01:25:01 | 22.734 | 11/27/2010 08:29:01 | 26.675 |
| 11/29/2010 01:45:01 | 22.609 | 11/27/2010 08:49:01 | 26.675 |



|                     |        |                     |        |
|---------------------|--------|---------------------|--------|
| 11/29/2010 02:05:01 | 22.609 | 11/27/2010 09:09:01 | 26.675 |
| 11/29/2010 02:25:01 | 22.421 | 11/27/2010 09:29:01 | 26.675 |
| 11/29/2010 02:45:01 | 22.171 | 11/27/2010 09:49:01 | 26.675 |
| 11/29/2010 03:05:01 | 21.921 | 11/27/2010 10:09:01 | 26.675 |
| 11/29/2010 03:25:01 | 21.733 | 11/27/2010 10:29:01 | 26.675 |
| 11/29/2010 03:45:01 | 21.671 | 11/27/2010 10:49:01 | 26.613 |
| 11/29/2010 04:05:01 | 21.483 | 11/27/2010 11:09:01 | 26.675 |
| 11/29/2010 04:25:01 | 21.295 | 11/27/2010 11:29:01 | 26.675 |
| 11/29/2010 04:45:01 | 21.295 | 11/27/2010 11:49:01 | 26.675 |
| 11/29/2010 05:05:01 | 21.358 | 11/27/2010 12:09:01 | 26.675 |
| 11/29/2010 05:25:01 | 21.295 | 11/27/2010 12:29:01 | 26.675 |
| 11/29/2010 05:45:01 | 21.608 | 11/27/2010 12:49:01 | 26.675 |
| 11/29/2010 06:05:01 | 22.046 | 11/27/2010 13:09:01 | 26.738 |
| 11/29/2010 06:25:01 | 22.734 | 11/27/2010 13:29:01 | 26.738 |
| 11/29/2010 06:45:01 | 23.547 | 11/27/2010 13:49:01 | 26.738 |
| 11/29/2010 07:05:01 | 24.734 | 11/27/2010 14:09:01 | 26.800 |
| 11/29/2010 07:25:01 | 25.359 | 11/27/2010 14:29:01 | 26.800 |
| 11/29/2010 07:45:01 | 25.672 | 11/27/2010 14:49:01 | 26.800 |
| 11/29/2010 08:05:01 | 26.984 | 11/27/2010 15:09:01 | 26.862 |
| 11/29/2010 08:25:01 | 27.233 | 11/27/2010 15:29:01 | 26.862 |
| 11/29/2010 08:45:01 | 26.921 | 11/27/2010 15:49:01 | 26.925 |
| 11/29/2010 09:05:01 | 25.609 | 11/27/2010 16:09:01 | 26.925 |
| 11/29/2010 09:25:01 | 23.234 | 11/27/2010 16:29:01 | 26.925 |
| 11/29/2010 09:45:01 | 23.172 | 11/27/2010 16:49:01 | 26.987 |
| 11/29/2010 10:05:01 | 23.609 | 11/27/2010 17:09:01 | 26.987 |
| 11/29/2010 10:25:01 | 24.484 | 11/27/2010 17:29:01 | 26.987 |
| 11/29/2010 10:45:01 | 25.672 | 11/27/2010 17:49:01 | 27.050 |
| 11/29/2010 11:05:01 | 26.359 | 11/27/2010 18:09:01 | 27.050 |
| 11/29/2010 11:25:01 | 27.109 | 11/27/2010 18:29:01 | 27.050 |
| 11/29/2010 11:45:01 | 29.731 | 11/27/2010 18:49:01 | 27.050 |
| 11/29/2010 12:05:01 | 30.729 | 11/27/2010 19:09:01 | 27.050 |
| 11/29/2010 12:25:01 | 31.228 | 11/27/2010 19:29:01 | 27.050 |
| 11/29/2010 12:45:01 | 32.163 | 11/27/2010 19:49:01 | 27.112 |
| 11/29/2010 13:05:01 | 33.099 | 11/27/2010 20:09:01 | 27.112 |
| 11/29/2010 13:25:01 | 34.345 | 11/27/2010 20:29:01 | 27.112 |
| 11/29/2010 13:45:01 | 35.093 | 11/27/2010 20:49:01 | 27.112 |
| 11/29/2010 14:05:01 | 35.218 | 11/27/2010 21:09:01 | 27.112 |
| 11/29/2010 14:25:01 | 35.280 | 11/27/2010 21:29:01 | 27.112 |
| 11/29/2010 14:45:01 | 34.158 | 11/27/2010 21:49:01 | 27.112 |
| 11/29/2010 15:05:01 | 32.725 | 11/27/2010 22:09:01 | 27.050 |
| 11/29/2010 15:25:01 | 31.976 | 11/27/2010 22:29:01 | 27.112 |
| 11/29/2010 15:45:01 | 30.916 | 11/27/2010 22:49:01 | 27.050 |
| 11/29/2010 16:05:01 | 30.292 | 11/27/2010 23:09:01 | 27.050 |
| 11/29/2010 16:25:01 | 29.543 | 11/27/2010 23:29:01 | 27.050 |
| 11/29/2010 16:45:01 | 28.919 | 11/27/2010 23:49:01 | 27.050 |
| 11/29/2010 17:05:01 | 28.108 | 11/28/2010 00:09:01 | 27.050 |
| 11/29/2010 17:25:01 | 27.358 | 11/28/2010 00:29:01 | 27.050 |
| 11/29/2010 17:45:01 | 26.671 | 11/28/2010 00:49:01 | 26.987 |
| 11/29/2010 18:05:01 | 26.172 | 11/28/2010 01:09:01 | 26.987 |
| 11/29/2010 18:25:01 | 25.734 | 11/28/2010 01:29:01 | 26.987 |

|                     |        |                     |        |
|---------------------|--------|---------------------|--------|
| 11/29/2010 18:45:01 | 25.422 | 11/28/2010 01:49:01 | 26.987 |
| 11/29/2010 19:05:01 | 25.172 | 11/28/2010 02:09:01 | 26.987 |
| 11/29/2010 19:25:01 | 25.109 | 11/28/2010 02:29:01 | 26.925 |
| 11/29/2010 19:45:01 | 24.922 | 11/28/2010 02:49:01 | 26.925 |
| 11/29/2010 20:24:01 | 25.689 | 11/28/2010 03:09:01 | 26.925 |
| 11/29/2010 20:44:01 | 25.064 | 11/28/2010 03:29:01 | 26.925 |
| 11/29/2010 21:04:01 | 24.814 | 11/28/2010 03:49:01 | 26.925 |
| 11/29/2010 21:24:01 | 24.564 | 11/28/2010 04:09:01 | 26.862 |
| 11/29/2010 21:44:01 | 24.252 | 11/28/2010 04:29:01 | 26.862 |
| 11/29/2010 22:04:01 | 24.064 | 11/28/2010 04:49:01 | 26.862 |
| 11/29/2010 22:24:01 | 23.814 | 11/28/2010 05:09:01 | 26.862 |
| 11/29/2010 22:44:01 | 23.627 | 11/28/2010 05:29:01 | 26.862 |
| 11/29/2010 23:04:01 | 23.564 | 11/28/2010 05:49:01 | 26.800 |
| 11/29/2010 23:24:01 | 23.439 | 11/28/2010 06:09:01 | 26.800 |
| 11/29/2010 23:44:01 | 23.376 | 11/28/2010 06:29:01 | 26.800 |
| 11/30/2010 00:04:01 | 23.439 | 11/28/2010 06:49:01 | 26.800 |
| 11/30/2010 00:24:01 | 23.627 | 11/28/2010 07:09:01 | 26.800 |
| 11/30/2010 00:44:01 | 23.752 | 11/28/2010 07:29:01 | 26.738 |
| 11/30/2010 01:04:01 | 23.752 | 11/28/2010 07:49:01 | 26.738 |
| 11/30/2010 01:24:01 | 23.814 | 11/28/2010 08:09:01 | 26.738 |
| 11/30/2010 01:44:01 | 23.939 | 11/28/2010 08:29:01 | 26.738 |
| 11/30/2010 02:04:01 | 24.127 | 11/28/2010 08:49:01 | 26.738 |
| 11/30/2010 02:24:01 | 24.127 | 11/28/2010 09:09:01 | 26.738 |
| 11/30/2010 02:44:01 | 23.814 | 11/28/2010 09:29:01 | 26.675 |
| 11/30/2010 03:04:01 | 23.627 | 11/28/2010 09:49:01 | 26.675 |
| 11/30/2010 03:24:01 | 23.752 | 11/28/2010 10:09:01 | 26.675 |
| 11/30/2010 03:44:01 | 23.939 | 11/28/2010 10:29:01 | 26.675 |
| 11/30/2010 04:04:01 | 23.877 | 11/28/2010 10:49:01 | 26.675 |
| 11/30/2010 04:24:01 | 23.689 | 11/28/2010 11:09:01 | 26.675 |
| 11/30/2010 04:44:01 | 23.376 | 11/28/2010 11:29:01 | 26.675 |
| 11/30/2010 05:04:01 | 23.251 | 11/28/2010 11:49:01 | 26.675 |
| 11/30/2010 05:24:01 | 23.501 | 11/28/2010 12:09:01 | 26.738 |
| 11/30/2010 05:44:01 | 23.814 | 11/28/2010 12:29:01 | 26.738 |
| 11/30/2010 06:04:01 | 24.689 | 11/28/2010 12:49:01 | 26.738 |
| 11/30/2010 06:24:01 | 25.377 | 11/28/2010 13:09:01 | 26.738 |
| 11/30/2010 06:44:01 | 26.064 | 11/28/2010 13:29:01 | 26.800 |
| 11/30/2010 07:04:01 | 26.564 | 11/28/2010 13:49:01 | 26.800 |
| 11/30/2010 07:24:01 | 26.877 | 11/28/2010 14:09:01 | 26.800 |
| 11/30/2010 07:44:01 | 27.501 | 11/28/2010 14:29:01 | 26.862 |
| 11/30/2010 08:04:01 | 27.938 | 11/28/2010 14:49:01 | 26.862 |
| 11/30/2010 08:24:01 | 28.063 | 11/28/2010 15:09:01 | 26.862 |
| 11/30/2010 08:44:01 | 29.000 | 11/28/2010 15:29:01 | 26.925 |
| 11/30/2010 09:04:01 | 29.874 | 11/28/2010 15:49:01 | 26.925 |
| 11/30/2010 09:24:01 | 31.870 | 11/28/2010 16:09:01 | 26.925 |
| 11/30/2010 09:44:01 | 29.874 | 11/28/2010 16:29:01 | 26.987 |
| 11/30/2010 10:04:01 | 31.933 | 11/28/2010 16:49:01 | 26.987 |
| 11/30/2010 10:24:01 | 34.053 | 11/28/2010 17:09:01 | 26.987 |
| 11/30/2010 10:44:01 | 34.988 | 11/28/2010 17:29:01 | 27.050 |
| 11/30/2010 11:04:01 | 35.922 | 11/28/2010 17:49:01 | 27.050 |
| 11/30/2010 11:24:01 | 35.860 | 11/28/2010 18:09:01 | 27.050 |

|                     |        |                     |        |
|---------------------|--------|---------------------|--------|
| 11/30/2010 11:44:01 | 34.427 | 11/28/2010 18:29:01 | 27.112 |
| 11/30/2010 12:04:01 | 35.112 | 11/28/2010 18:49:01 | 27.112 |
| 11/30/2010 12:24:01 | 36.607 | 11/28/2010 19:09:01 | 27.112 |
| 11/30/2010 12:44:01 | 33.928 | 11/28/2010 19:29:01 | 27.112 |
| 11/30/2010 13:04:01 | 35.050 | 11/28/2010 19:49:01 | 27.112 |
| 11/30/2010 13:24:01 | 38.040 | 11/28/2010 20:09:01 | 27.112 |
| 11/30/2010 13:44:01 | 38.102 | 11/28/2010 20:29:01 | 27.112 |
| 11/30/2010 14:04:01 | 35.361 | 11/28/2010 20:49:01 | 27.112 |
| 11/30/2010 14:24:01 | 37.853 | 11/28/2010 21:09:01 | 27.112 |
| 11/30/2010 14:44:01 | 36.919 | 11/28/2010 21:29:01 | 27.112 |
| 11/30/2010 15:04:01 | 35.361 | 11/28/2010 21:49:01 | 27.112 |
| 11/30/2010 15:24:01 | 35.361 | 11/28/2010 22:09:01 | 27.112 |
| 11/30/2010 15:44:01 | 34.801 | 11/28/2010 22:29:01 | 27.112 |
| 11/30/2010 16:04:01 | 34.738 | 11/28/2010 22:49:01 | 27.112 |
| 11/30/2010 16:24:01 | 33.492 | 11/28/2010 23:09:01 | 27.112 |
| 11/30/2010 16:44:01 | 31.933 | 11/28/2010 23:29:01 | 27.050 |
| 11/30/2010 17:04:01 | 30.685 | 11/28/2010 23:49:01 | 27.050 |
| 11/30/2010 17:24:01 | 29.811 | 11/29/2010 00:09:01 | 27.050 |
| 11/30/2010 17:44:01 | 29.250 | 11/29/2010 00:29:01 | 27.050 |
| 11/30/2010 18:04:01 | 28.813 | 11/29/2010 00:49:01 | 27.050 |
| 11/30/2010 18:24:01 | 28.376 | 11/29/2010 01:09:01 | 27.050 |
| 11/30/2010 18:44:01 | 28.063 | 11/29/2010 01:29:01 | 26.987 |
| 11/30/2010 19:04:01 | 27.813 | 11/29/2010 01:49:01 | 26.987 |
| 11/30/2010 19:24:01 | 27.376 | 11/29/2010 02:09:01 | 26.987 |
| 11/30/2010 19:44:01 | 26.877 | 11/29/2010 02:29:01 | 26.987 |
| 11/30/2010 20:04:01 | 26.564 | 11/29/2010 02:49:01 | 26.925 |
| 11/30/2010 20:24:01 | 26.314 | 11/29/2010 03:09:01 | 26.925 |
| 11/30/2010 20:44:01 | 26.314 | 11/29/2010 03:29:01 | 26.925 |
| 11/30/2010 21:04:01 | 26.002 | 11/29/2010 03:49:01 | 26.925 |
| 11/30/2010 21:24:01 | 25.439 | 11/29/2010 04:09:01 | 26.925 |
| 11/30/2010 21:44:01 | 24.814 | 11/29/2010 04:29:01 | 26.862 |
| 11/30/2010 22:04:01 | 24.314 | 11/29/2010 04:49:01 | 26.862 |
| 11/30/2010 22:24:01 | 23.752 | 11/29/2010 05:09:01 | 26.862 |
| 11/30/2010 22:44:01 | 23.314 | 11/29/2010 05:29:01 | 26.800 |
| 11/30/2010 23:04:01 | 22.939 | 11/29/2010 05:49:01 | 26.800 |
| 11/30/2010 23:24:01 | 22.688 | 11/29/2010 06:09:01 | 26.800 |
| 11/30/2010 23:44:01 | 22.501 | 11/29/2010 06:29:01 | 26.800 |
| 12/1/2010 00:04:01  | 22.438 | 11/29/2010 06:49:01 | 26.738 |
| 12/1/2010 00:24:01  | 22.313 | 11/29/2010 07:09:01 | 26.738 |
| 12/1/2010 00:44:01  | 22.125 | 11/29/2010 07:29:01 | 26.738 |
| 12/1/2010 01:04:01  | 22.376 | 11/29/2010 07:49:01 | 26.738 |
| 12/1/2010 01:24:01  | 22.438 | 11/29/2010 08:09:01 | 26.675 |
| 12/1/2010 01:44:01  | 22.438 | 11/29/2010 08:29:01 | 26.675 |
| 12/1/2010 02:04:01  | 22.188 | 11/29/2010 08:49:01 | 26.675 |
| 12/1/2010 02:24:01  | 21.813 | 11/29/2010 09:09:01 | 26.675 |
| 12/1/2010 02:44:01  | 21.562 | 11/29/2010 09:29:01 | 26.675 |
| 12/1/2010 03:04:01  | 21.312 | 11/29/2010 09:49:01 | 26.675 |
| 12/1/2010 03:24:01  | 21.124 | 11/29/2010 10:09:01 | 26.613 |
| 12/1/2010 03:44:01  | 21.124 | 11/29/2010 10:29:01 | 26.613 |
| 12/1/2010 04:04:01  | 21.187 | 11/29/2010 10:49:01 | 26.613 |

|                    |        |                     |        |
|--------------------|--------|---------------------|--------|
| 12/1/2010 04:24:01 | 21.249 | 11/29/2010 11:09:01 | 26.613 |
| 12/1/2010 04:44:01 | 21.375 | 11/29/2010 11:29:01 | 26.613 |
| 12/1/2010 05:04:01 | 21.562 | 11/29/2010 11:49:01 | 26.613 |
| 12/1/2010 05:24:01 | 21.625 | 11/29/2010 12:09:01 | 26.613 |
| 12/1/2010 05:44:01 | 21.813 | 11/29/2010 12:29:01 | 26.613 |
| 12/1/2010 06:04:01 | 22.313 | 11/29/2010 12:49:01 | 26.613 |
| 12/1/2010 06:24:01 | 23.376 | 11/29/2010 13:09:01 | 26.613 |
| 12/1/2010 06:44:01 | 25.002 | 11/29/2010 13:29:01 | 26.613 |
| 12/1/2010 07:04:01 | 26.064 | 11/29/2010 13:49:01 | 26.613 |
| 12/1/2010 07:24:01 | 28.563 | 11/29/2010 14:09:01 | 26.613 |
| 12/1/2010 07:44:01 | 30.123 | 11/29/2010 14:29:01 | 26.613 |
| 12/1/2010 08:04:01 | 30.810 | 11/29/2010 14:49:01 | 26.675 |
| 12/1/2010 08:24:01 | 31.309 | 11/29/2010 15:09:01 | 26.675 |
| 12/1/2010 08:44:01 | 31.808 | 11/29/2010 15:29:01 | 26.675 |
| 12/1/2010 09:04:01 | 32.556 | 11/29/2010 15:49:01 | 26.738 |
| 12/1/2010 09:24:01 | 33.616 | 11/29/2010 16:09:01 | 26.800 |
| 12/1/2010 09:44:01 | 35.860 | 11/29/2010 16:29:01 | 26.800 |
| 12/1/2010 10:04:01 | 36.358 | 11/29/2010 16:49:01 | 26.862 |
| 12/1/2010 10:24:01 | 35.673 | 11/29/2010 17:09:01 | 26.862 |
| 12/1/2010 10:44:01 | 36.981 | 11/29/2010 17:29:01 | 26.862 |
| 12/1/2010 11:04:01 | 37.355 | 11/29/2010 17:49:01 | 26.925 |
| 12/1/2010 11:24:01 | 37.853 | 11/29/2010 18:09:01 | 26.925 |
| 12/1/2010 11:44:01 | 38.538 | 11/29/2010 18:29:01 | 26.925 |
| 12/1/2010 12:04:01 | 38.164 | 11/29/2010 18:49:01 | 26.987 |
| 12/1/2010 12:24:01 | 38.351 | 11/29/2010 19:09:01 | 26.987 |
| 12/1/2010 12:44:01 | 37.791 | 11/29/2010 19:29:01 | 26.987 |
| 12/1/2010 13:04:01 | 39.160 | 11/29/2010 19:49:01 | 26.987 |
| 12/1/2010 13:24:01 | 37.853 | 11/29/2010 20:09:01 | 26.987 |
| 12/1/2010 13:44:01 | 40.093 | 11/29/2010 20:29:01 | 26.987 |
| 12/1/2010 14:04:01 | 39.098 | 11/29/2010 20:49:01 | 26.987 |
| 12/1/2010 14:24:01 | 38.040 | 11/29/2010 21:09:01 | 26.987 |
| 12/1/2010 14:44:01 | 39.471 | 11/29/2010 21:29:01 | 26.987 |
| 12/1/2010 15:04:01 | 37.168 | 11/29/2010 21:49:01 | 26.987 |
| 12/1/2010 15:24:01 | 36.794 | 11/29/2010 22:09:01 | 26.987 |
| 12/1/2010 15:44:01 | 36.981 | 11/29/2010 22:29:01 | 26.987 |
| 12/1/2010 16:04:01 | 37.043 | 11/29/2010 22:49:01 | 26.987 |
| 12/1/2010 16:24:01 | 35.984 | 11/29/2010 23:09:01 | 26.987 |
| 12/1/2010 16:44:01 | 34.676 | 11/29/2010 23:29:01 | 26.987 |
| 12/1/2010 17:04:01 | 33.616 | 11/29/2010 23:49:01 | 26.925 |
| 12/1/2010 17:24:01 | 32.619 | 11/30/2010 00:09:01 | 26.925 |
| 12/1/2010 17:44:01 | 31.558 | 11/30/2010 00:29:01 | 26.925 |
| 12/1/2010 18:04:01 | 30.623 | 11/30/2010 00:49:01 | 26.925 |
| 12/1/2010 18:24:01 | 29.999 | 11/30/2010 01:09:01 | 26.925 |
| 12/1/2010 18:44:01 | 29.562 | 11/30/2010 01:29:01 | 26.925 |
| 12/1/2010 19:04:01 | 29.312 | 11/30/2010 01:49:01 | 26.925 |
| 12/1/2010 19:24:01 | 29.062 | 11/30/2010 02:09:01 | 26.862 |
| 12/1/2010 19:44:01 | 28.001 | 11/30/2010 02:29:01 | 26.862 |
| 12/1/2010 20:04:01 | 26.564 | 11/30/2010 02:49:01 | 26.862 |
| 12/1/2010 20:24:01 | 25.939 | 11/30/2010 03:09:01 | 26.862 |
| 12/1/2010 20:44:01 | 25.627 | 11/30/2010 03:29:01 | 26.862 |

|                    |        |                     |        |
|--------------------|--------|---------------------|--------|
| 12/1/2010 21:04:01 | 25.439 | 11/30/2010 03:49:01 | 26.800 |
| 12/1/2010 21:24:01 | 25.252 | 11/30/2010 04:09:01 | 26.800 |
| 12/1/2010 21:44:01 | 25.002 | 11/30/2010 04:29:01 | 26.800 |
| 12/1/2010 22:04:01 | 24.877 | 11/30/2010 04:49:01 | 26.800 |
| 12/1/2010 22:24:01 | 24.627 | 11/30/2010 05:09:01 | 26.800 |
| 12/1/2010 22:44:01 | 24.189 | 11/30/2010 05:29:01 | 26.738 |
| 12/1/2010 23:04:01 | 23.877 | 11/30/2010 05:49:01 | 26.738 |
| 12/1/2010 23:24:01 | 23.689 | 11/30/2010 06:09:01 | 26.738 |
| 12/1/2010 23:44:01 | 23.689 | 11/30/2010 06:29:01 | 26.738 |
| 12/2/2010 00:04:01 | 23.627 | 11/30/2010 06:49:01 | 26.738 |
| 12/2/2010 00:24:01 | 23.689 | 11/30/2010 07:09:01 | 26.738 |
| 12/2/2010 00:44:01 | 23.689 | 11/30/2010 07:29:01 | 26.675 |
| 12/2/2010 01:04:01 | 23.564 | 11/30/2010 07:49:01 | 26.675 |
| 12/2/2010 01:24:01 | 23.564 | 11/30/2010 08:09:01 | 26.675 |
| 12/2/2010 01:44:01 | 23.564 | 11/30/2010 08:29:01 | 26.675 |
| 12/2/2010 02:04:01 | 23.439 | 11/30/2010 08:49:01 | 26.675 |
| 12/2/2010 02:24:01 | 23.251 | 11/30/2010 09:09:01 | 26.675 |
| 12/2/2010 02:44:01 | 23.001 | 11/30/2010 09:29:01 | 26.675 |
| 12/2/2010 03:04:01 | 22.751 | 11/30/2010 09:49:01 | 26.675 |
| 12/2/2010 03:24:01 | 22.626 | 11/30/2010 10:09:01 | 26.675 |
| 12/2/2010 03:44:01 | 22.376 | 11/30/2010 10:29:01 | 26.613 |
| 12/2/2010 04:04:01 | 22.313 | 11/30/2010 10:49:01 | 26.675 |
| 12/2/2010 04:24:01 | 22.125 | 11/30/2010 11:09:01 | 26.613 |
| 12/2/2010 04:44:01 | 22.063 | 11/30/2010 11:29:01 | 26.675 |
| 12/2/2010 05:04:01 | 22.063 | 11/30/2010 11:49:01 | 26.675 |
| 12/2/2010 05:24:01 | 22.063 | 11/30/2010 12:09:01 | 26.675 |
| 12/2/2010 05:44:01 | 22.501 | 11/30/2010 12:29:01 | 26.675 |
| 12/2/2010 06:04:01 | 23.376 | 11/30/2010 12:49:01 | 26.738 |
| 12/2/2010 06:24:01 | 24.502 | 11/30/2010 13:09:01 | 26.738 |
| 12/2/2010 06:44:01 | 25.252 | 11/30/2010 13:29:01 | 26.738 |
| 12/2/2010 07:04:01 | 26.377 | 11/30/2010 13:49:01 | 26.800 |
| 12/2/2010 07:24:01 | 26.752 | 11/30/2010 14:09:01 | 26.800 |
| 12/2/2010 07:44:01 | 27.002 | 11/30/2010 14:29:01 | 26.862 |
| 12/2/2010 08:04:01 | 27.689 | 11/30/2010 14:49:01 | 26.862 |
| 12/2/2010 08:24:01 | 28.563 | 11/30/2010 15:09:01 | 26.925 |
| 12/2/2010 08:44:01 | 29.811 | 11/30/2010 15:29:01 | 26.925 |
| 12/2/2010 09:04:01 | 30.498 | 11/30/2010 15:49:01 | 26.987 |
| 12/2/2010 09:24:01 | 31.247 | 11/30/2010 16:09:01 | 27.050 |
| 12/2/2010 09:44:01 | 30.248 | 11/30/2010 16:29:01 | 27.050 |
| 12/2/2010 10:04:01 | 30.435 | 11/30/2010 16:49:01 | 27.112 |
| 12/2/2010 10:24:01 | 31.496 | 11/30/2010 17:09:01 | 27.112 |
| 12/2/2010 10:44:01 | 32.743 | 11/30/2010 17:29:01 | 27.112 |
| 12/2/2010 11:04:01 | 34.115 | 11/30/2010 17:49:01 | 27.175 |
| 12/2/2010 11:24:01 | 33.242 | 11/30/2010 18:09:01 | 27.175 |
| 12/2/2010 11:44:01 | 32.931 | 11/30/2010 18:29:01 | 27.237 |
| 12/2/2010 12:04:01 | 35.673 | 11/30/2010 18:49:01 | 27.237 |
| 12/2/2010 12:24:01 | 34.676 | 11/30/2010 19:09:01 | 27.237 |
| 12/2/2010 12:44:01 | 34.676 | 11/30/2010 19:29:01 | 27.237 |
| 12/2/2010 13:04:01 | 35.735 | 11/30/2010 19:49:01 | 27.237 |
| 12/2/2010 13:24:01 | 35.548 | 11/30/2010 20:09:01 | 27.237 |

|                    |        |                     |        |
|--------------------|--------|---------------------|--------|
| 12/2/2010 13:44:01 | 35.237 | 11/30/2010 20:29:01 | 27.237 |
| 12/2/2010 14:04:01 | 34.427 | 11/30/2010 20:49:01 | 27.237 |
| 12/2/2010 14:24:01 | 34.988 | 11/30/2010 21:09:01 | 27.237 |
| 12/2/2010 14:44:01 | 35.611 | 11/30/2010 21:29:01 | 27.237 |
| 12/2/2010 15:04:01 | 35.486 | 11/30/2010 21:49:01 | 27.237 |
| 12/2/2010 15:24:01 | 33.928 | 11/30/2010 22:09:01 | 27.237 |
| 12/2/2010 15:44:01 | 33.367 | 11/30/2010 22:29:01 | 27.237 |
| 12/2/2010 16:04:01 | 32.494 | 11/30/2010 22:49:01 | 27.237 |
| 12/2/2010 16:24:01 | 31.683 | 11/30/2010 23:09:01 | 27.237 |
| 12/2/2010 16:44:01 | 31.184 | 11/30/2010 23:29:01 | 27.237 |
| 12/2/2010 17:04:01 | 29.874 | 11/30/2010 23:49:01 | 27.237 |
| 12/2/2010 17:24:01 | 29.125 | 12/1/2010 00:09:01  | 27.237 |
| 12/2/2010 17:44:01 | 28.813 | 12/1/2010 00:29:01  | 27.175 |
| 12/2/2010 18:04:01 | 28.376 | 12/1/2010 00:49:01  | 27.175 |
| 12/2/2010 18:24:01 | 27.938 | 12/1/2010 01:09:01  | 27.175 |
| 12/2/2010 18:44:01 | 27.376 | 12/1/2010 01:29:01  | 27.175 |
| 12/2/2010 19:04:01 | 26.564 | 12/1/2010 01:49:01  | 27.175 |
| 12/2/2010 19:24:01 | 24.564 | 12/1/2010 02:09:01  | 27.112 |
| 12/2/2010 19:44:01 | 24.064 | 12/1/2010 02:29:01  | 27.112 |
| 12/2/2010 20:04:01 | 23.877 | 12/1/2010 02:49:01  | 27.112 |
| 12/2/2010 20:24:01 | 23.814 | 12/1/2010 03:09:01  | 27.112 |
| 12/2/2010 20:44:01 | 23.814 | 12/1/2010 03:29:01  | 27.050 |
| 12/2/2010 21:04:01 | 23.752 | 12/1/2010 03:49:01  | 27.050 |
| 12/2/2010 21:24:01 | 23.689 | 12/1/2010 04:09:01  | 27.050 |
| 12/2/2010 21:44:01 | 23.564 | 12/1/2010 04:29:01  | 26.987 |
| 12/2/2010 22:04:01 | 23.439 | 12/1/2010 04:49:01  | 26.987 |
| 12/2/2010 22:24:01 | 23.314 | 12/1/2010 05:09:01  | 26.987 |
| 12/2/2010 22:44:01 | 23.126 | 12/1/2010 05:29:01  | 26.925 |
| 12/2/2010 23:04:01 | 23.189 | 12/1/2010 05:49:01  | 26.925 |
| 12/2/2010 23:24:01 | 23.376 | 12/1/2010 06:09:01  | 26.925 |
| 12/2/2010 23:44:01 | 23.439 | 12/1/2010 06:29:01  | 26.925 |
| 12/3/2010 00:04:01 | 23.251 | 12/1/2010 06:49:01  | 26.862 |
| 12/3/2010 00:24:01 | 23.126 | 12/1/2010 07:09:01  | 26.862 |
| 12/3/2010 00:44:01 | 23.189 | 12/1/2010 07:19:01  | 27.509 |
| 12/3/2010 01:04:01 | 23.126 | 12/1/2010 07:39:01  | 27.446 |
| 12/3/2010 01:24:01 | 22.939 | 12/1/2010 07:59:01  | 27.446 |
| 12/3/2010 01:44:01 | 23.126 | 12/1/2010 08:19:01  | 27.446 |
| 12/3/2010 02:04:01 | 23.314 | 12/1/2010 08:39:01  | 27.446 |
| 12/3/2010 02:24:01 | 23.376 | 12/1/2010 08:59:01  | 27.384 |
| 12/3/2010 02:44:01 | 23.501 | 12/1/2010 09:19:01  | 27.384 |
| 12/3/2010 03:04:01 | 23.564 | 12/1/2010 09:39:01  | 27.384 |
| 12/3/2010 03:24:01 | 23.564 | 12/1/2010 09:59:01  | 27.384 |
| 12/3/2010 03:44:01 | 23.564 | 12/1/2010 10:19:01  | 27.384 |
| 12/3/2010 04:04:01 | 23.439 | 12/1/2010 10:39:01  | 27.384 |
| 12/3/2010 04:24:01 | 23.501 | 12/1/2010 10:59:01  | 27.384 |
| 12/3/2010 04:44:01 | 23.501 | 12/1/2010 11:19:01  | 27.384 |
| 12/3/2010 05:04:01 | 23.439 | 12/1/2010 11:39:01  | 27.384 |
| 12/3/2010 05:24:01 | 23.376 | 12/1/2010 11:59:01  | 27.384 |
| 12/3/2010 05:44:01 | 23.627 | 12/1/2010 12:19:01  | 27.384 |
| 12/3/2010 06:04:01 | 24.002 | 12/1/2010 12:39:01  | 27.384 |

|                    |        |                    |        |
|--------------------|--------|--------------------|--------|
| 12/3/2010 06:24:01 | 23.939 | 12/1/2010 12:59:01 | 27.446 |
| 12/3/2010 06:44:01 | 24.064 | 12/1/2010 13:19:01 | 27.446 |
| 12/3/2010 07:04:01 | 24.189 | 12/1/2010 13:39:01 | 27.446 |
| 12/3/2010 07:24:01 | 24.439 | 12/1/2010 13:59:01 | 27.509 |
| 12/3/2010 07:44:01 | 24.752 | 12/1/2010 14:19:01 | 27.509 |
| 12/3/2010 08:04:01 | 24.877 | 12/1/2010 14:39:01 | 27.509 |
| 12/3/2010 08:24:01 | 25.252 | 12/1/2010 14:59:01 | 27.571 |
| 12/3/2010 08:44:01 | 25.752 | 12/1/2010 15:19:01 | 27.571 |
| 12/3/2010 09:04:01 | 26.502 | 12/1/2010 15:39:01 | 27.634 |
| 12/3/2010 09:24:01 | 27.189 | 12/1/2010 15:59:01 | 27.634 |
| 12/3/2010 09:44:01 | 28.063 | 12/1/2010 16:19:01 | 27.696 |
| 12/3/2010 10:04:01 | 29.187 | 12/1/2010 16:39:01 | 27.696 |
| 12/3/2010 10:24:01 | 30.123 | 12/1/2010 16:59:01 | 27.759 |
| 12/3/2010 10:44:01 | 30.935 | 12/1/2010 17:19:01 | 27.759 |
| 12/3/2010 11:04:01 | 31.683 | 12/1/2010 17:39:01 | 27.821 |
| 12/3/2010 11:24:01 | 31.933 | 12/1/2010 17:59:01 | 27.821 |
| 12/3/2010 11:44:01 | 31.933 | 12/1/2010 18:19:01 | 27.883 |
| 12/3/2010 12:04:01 | 32.182 | 12/1/2010 18:39:01 | 27.883 |
| 12/3/2010 12:24:01 | 32.931 | 12/1/2010 18:59:01 | 27.883 |
| 12/3/2010 12:44:01 | 32.369 | 12/1/2010 19:19:01 | 27.946 |
| 12/3/2010 13:04:01 | 33.118 | 12/1/2010 19:39:01 | 27.946 |
| 12/3/2010 13:24:01 | 34.925 | 12/1/2010 19:59:01 | 27.946 |
| 12/3/2010 13:44:01 | 36.047 | 12/1/2010 20:19:01 | 27.946 |
| 12/3/2010 14:04:01 | 34.863 | 12/1/2010 20:39:01 | 28.008 |
| 12/3/2010 14:24:01 | 33.679 | 12/1/2010 20:59:01 | 28.008 |
| 12/3/2010 14:44:01 | 33.741 | 12/1/2010 21:19:01 | 28.008 |
| 12/3/2010 15:04:01 | 33.429 | 12/1/2010 21:39:01 | 28.008 |
| 12/3/2010 15:24:01 | 33.118 | 12/1/2010 21:59:01 | 28.008 |
| 12/3/2010 15:44:01 | 32.619 | 12/1/2010 22:19:01 | 28.008 |
| 12/3/2010 16:04:01 | 32.494 | 12/1/2010 22:39:01 | 28.008 |
| 12/3/2010 16:24:01 | 32.556 | 12/1/2010 22:59:01 | 28.008 |
| 12/3/2010 16:44:01 | 32.307 | 12/1/2010 23:19:01 | 28.008 |
| 12/3/2010 17:04:01 | 32.120 | 12/1/2010 23:39:01 | 28.008 |
| 12/3/2010 17:24:01 | 31.434 | 12/1/2010 23:59:01 | 28.008 |
| 12/3/2010 17:44:01 | 30.498 | 12/2/2010 00:19:01 | 28.008 |
| 12/3/2010 18:04:01 | 29.374 | 12/2/2010 00:39:01 | 28.008 |
| 12/3/2010 18:24:01 | 28.188 | 12/2/2010 00:59:01 | 27.946 |
| 12/3/2010 18:44:01 | 27.189 | 12/2/2010 01:19:01 | 27.946 |
| 12/3/2010 19:04:01 | 26.439 | 12/2/2010 01:39:01 | 27.946 |
| 12/3/2010 19:24:01 | 25.689 | 12/2/2010 01:59:01 | 27.946 |
| 12/3/2010 19:44:01 | 25.189 | 12/2/2010 02:19:01 | 27.946 |
| 12/3/2010 20:04:01 | 24.752 | 12/2/2010 02:39:01 | 27.883 |
| 12/3/2010 20:24:01 | 24.502 | 12/2/2010 02:59:01 | 27.883 |
| 12/3/2010 20:44:01 | 24.189 | 12/2/2010 03:19:01 | 27.883 |
| 12/3/2010 21:04:01 | 23.939 | 12/2/2010 03:39:01 | 27.883 |
| 12/3/2010 21:24:01 | 23.689 | 12/2/2010 03:59:01 | 27.821 |
| 12/3/2010 21:44:01 | 23.564 | 12/2/2010 04:19:01 | 27.821 |
| 12/3/2010 22:04:01 | 23.564 | 12/2/2010 04:39:01 | 27.821 |
| 12/3/2010 22:24:01 | 23.376 | 12/2/2010 04:59:01 | 27.821 |
| 12/3/2010 22:44:01 | 23.251 | 12/2/2010 05:19:01 | 27.821 |

|                    |        |                    |        |
|--------------------|--------|--------------------|--------|
| 12/3/2010 23:04:01 | 23.126 | 12/2/2010 05:39:01 | 27.759 |
| 12/3/2010 23:24:01 | 22.939 | 12/2/2010 05:59:01 | 27.759 |
| 12/3/2010 23:44:01 | 22.751 | 12/2/2010 06:19:01 | 27.759 |
| 12/4/2010 00:04:01 | 22.626 | 12/2/2010 06:39:01 | 27.696 |
| 12/4/2010 00:24:01 | 22.438 | 12/2/2010 06:59:01 | 27.696 |
| 12/4/2010 00:44:01 | 22.438 | 12/2/2010 07:19:01 | 27.696 |
| 12/4/2010 01:04:01 | 22.563 | 12/2/2010 07:39:01 | 27.696 |
| 12/4/2010 01:24:01 | 22.751 | 12/2/2010 07:59:01 | 27.634 |
| 12/4/2010 01:44:01 | 22.876 | 12/2/2010 08:19:01 | 27.634 |
| 12/4/2010 02:04:01 | 22.876 | 12/2/2010 08:39:01 | 27.634 |
| 12/4/2010 02:24:01 | 22.814 | 12/2/2010 08:59:01 | 27.634 |
| 12/4/2010 02:44:01 | 23.001 | 12/2/2010 09:19:01 | 27.571 |
| 12/4/2010 03:04:01 | 23.001 | 12/2/2010 09:39:01 | 27.571 |
| 12/4/2010 03:24:01 | 23.439 | 12/2/2010 09:59:01 | 27.571 |
| 12/4/2010 03:44:01 | 23.439 | 12/2/2010 10:19:01 | 27.571 |
| 12/4/2010 04:04:01 | 23.564 | 12/2/2010 10:39:01 | 27.571 |
| 12/4/2010 04:24:01 | 23.564 | 12/2/2010 10:59:01 | 27.571 |
| 12/4/2010 04:44:01 | 23.564 | 12/2/2010 11:19:01 | 27.571 |
| 12/4/2010 05:04:01 | 23.627 | 12/2/2010 11:39:01 | 27.571 |
| 12/4/2010 05:24:01 | 23.752 | 12/2/2010 11:59:01 | 27.571 |
| 12/4/2010 05:44:01 | 23.877 | 12/2/2010 12:19:01 | 27.571 |
| 12/4/2010 06:04:01 | 24.064 | 12/2/2010 12:39:01 | 27.571 |
| 12/4/2010 06:24:01 | 24.377 | 12/2/2010 12:59:01 | 27.571 |
| 12/4/2010 06:44:01 | 25.064 | 12/2/2010 13:19:01 | 27.571 |
| 12/4/2010 07:04:01 | 25.502 | 12/2/2010 13:39:01 | 27.571 |
| 12/4/2010 07:24:01 | 26.189 | 12/2/2010 13:59:01 | 27.571 |
| 12/4/2010 07:44:01 | 26.627 | 12/2/2010 14:19:01 | 27.571 |
| 12/4/2010 08:04:01 | 27.689 | 12/2/2010 14:39:01 | 27.571 |
| 12/4/2010 08:24:01 | 29.811 | 12/2/2010 14:59:01 | 27.634 |
| 12/4/2010 08:44:01 | 30.373 | 12/2/2010 15:19:01 | 27.634 |
| 12/4/2010 09:04:01 | 30.872 | 12/2/2010 15:39:01 | 27.634 |
| 12/4/2010 09:24:01 | 32.245 | 12/2/2010 15:59:01 | 27.634 |
| 12/4/2010 09:44:01 | 34.240 | 12/2/2010 16:19:01 | 27.696 |
| 12/4/2010 10:04:01 | 34.551 | 12/2/2010 16:39:01 | 27.696 |
| 12/4/2010 10:24:01 | 34.988 | 12/2/2010 16:59:01 | 27.696 |
| 12/4/2010 10:44:01 | 35.548 | 12/2/2010 17:19:01 | 27.696 |
| 12/4/2010 11:04:01 | 35.922 | 12/2/2010 17:39:01 | 27.759 |
| 12/4/2010 11:24:01 | 35.922 | 12/2/2010 17:59:01 | 27.759 |
| 12/4/2010 11:44:01 | 36.171 | 12/2/2010 18:19:01 | 27.759 |
| 12/4/2010 12:04:01 | 36.358 | 12/2/2010 18:39:01 | 27.821 |
| 12/4/2010 12:24:01 | 37.106 | 12/2/2010 18:59:01 | 27.821 |
| 12/4/2010 12:44:01 | 36.794 | 12/2/2010 19:19:01 | 27.821 |
| 12/4/2010 13:04:01 | 37.168 | 12/2/2010 19:39:01 | 27.821 |
| 12/4/2010 13:24:01 | 37.853 | 12/2/2010 19:59:01 | 27.821 |
| 12/4/2010 13:44:01 | 37.604 | 12/2/2010 20:19:01 | 27.821 |
| 12/4/2010 14:04:01 | 38.040 | 12/2/2010 20:39:01 | 27.821 |
| 12/4/2010 14:24:01 | 38.040 | 12/2/2010 20:59:01 | 27.821 |
| 12/4/2010 14:44:01 | 37.417 | 12/2/2010 21:19:01 | 27.821 |
| 12/4/2010 15:04:01 | 35.860 | 12/2/2010 21:39:01 | 27.821 |
| 12/4/2010 15:24:01 | 35.175 | 12/2/2010 21:59:01 | 27.821 |



|                    |        |                    |        |
|--------------------|--------|--------------------|--------|
| 12/4/2010 15:44:01 | 34.551 | 12/2/2010 22:19:01 | 27.821 |
| 12/4/2010 16:04:01 | 34.053 | 12/2/2010 22:39:01 | 27.821 |
| 12/4/2010 16:24:01 | 33.429 | 12/2/2010 22:59:01 | 27.821 |
| 12/4/2010 16:44:01 | 32.619 | 12/2/2010 23:19:01 | 27.821 |
| 12/4/2010 17:04:01 | 31.434 | 12/2/2010 23:39:01 | 27.821 |
| 12/4/2010 17:24:01 | 30.311 | 12/2/2010 23:59:01 | 27.759 |
| 12/4/2010 17:44:01 | 29.125 | 12/3/2010 00:19:01 | 27.759 |
| 12/4/2010 18:04:01 | 27.938 | 12/3/2010 00:39:01 | 27.759 |
| 12/4/2010 18:24:01 | 26.939 | 12/3/2010 00:59:01 | 27.759 |
| 12/4/2010 18:44:01 | 26.002 | 12/3/2010 01:19:01 | 27.759 |
| 12/4/2010 19:04:01 | 25.189 | 12/3/2010 01:39:01 | 27.759 |
| 12/4/2010 19:24:01 | 24.377 | 12/3/2010 01:59:01 | 27.696 |
| 12/4/2010 19:44:01 | 23.814 | 12/3/2010 02:19:01 | 27.696 |
| 12/4/2010 20:04:01 | 23.689 | 12/3/2010 02:39:01 | 27.696 |
| 12/4/2010 20:24:01 | 23.752 | 12/3/2010 02:59:01 | 27.696 |
| 12/4/2010 20:44:01 | 23.689 | 12/3/2010 03:19:01 | 27.696 |
| 12/4/2010 21:04:01 | 23.439 | 12/3/2010 03:39:01 | 27.634 |
| 12/4/2010 21:24:01 | 23.251 | 12/3/2010 03:59:01 | 27.634 |
| 12/4/2010 21:44:01 | 23.126 | 12/3/2010 04:19:01 | 27.634 |
| 12/4/2010 22:04:01 | 23.001 | 12/3/2010 04:39:01 | 27.571 |
| 12/4/2010 22:24:01 | 22.751 | 12/3/2010 04:59:01 | 27.571 |
| 12/4/2010 22:44:01 | 22.688 | 12/3/2010 05:19:01 | 27.571 |
| 12/4/2010 23:04:01 | 22.688 | 12/3/2010 05:39:01 | 27.571 |
| 12/4/2010 23:24:01 | 22.438 | 12/3/2010 05:59:01 | 27.509 |
| 12/4/2010 23:44:01 | 22.188 | 12/3/2010 06:19:01 | 27.509 |
| 12/5/2010 00:04:01 | 22.000 | 12/3/2010 06:39:01 | 27.509 |
| 12/5/2010 00:24:01 | 21.750 | 12/3/2010 06:59:01 | 27.446 |
| 12/5/2010 00:44:01 | 21.500 | 12/3/2010 07:19:01 | 27.446 |
| 12/5/2010 01:04:01 | 21.500 | 12/3/2010 07:39:01 | 27.446 |
| 12/5/2010 01:24:01 | 21.562 | 12/3/2010 07:59:01 | 27.446 |
| 12/5/2010 01:44:01 | 21.562 | 12/3/2010 08:19:01 | 27.384 |
| 12/5/2010 02:04:01 | 21.813 | 12/3/2010 08:39:01 | 27.384 |
| 12/5/2010 02:24:01 | 21.875 | 12/3/2010 08:59:01 | 27.384 |
| 12/5/2010 02:44:01 | 21.750 | 12/3/2010 09:19:01 | 27.384 |
| 12/5/2010 03:04:01 | 21.500 | 12/3/2010 09:39:01 | 27.384 |
| 12/5/2010 03:24:01 | 21.312 | 12/3/2010 09:59:01 | 27.384 |
| 12/5/2010 03:44:01 | 21.437 | 12/3/2010 10:19:01 | 27.321 |
| 12/5/2010 04:04:01 | 21.562 | 12/3/2010 10:39:01 | 27.321 |
| 12/5/2010 04:24:01 | 21.938 | 12/3/2010 10:59:01 | 27.321 |
| 12/5/2010 04:44:01 | 22.188 | 12/3/2010 11:19:01 | 27.321 |
| 12/5/2010 05:04:01 | 22.251 | 12/3/2010 11:39:01 | 27.321 |
| 12/5/2010 05:24:01 | 22.313 | 12/3/2010 11:59:01 | 27.321 |
| 12/5/2010 05:44:01 | 22.376 | 12/3/2010 12:19:01 | 27.321 |
| 12/5/2010 06:04:01 | 22.876 | 12/3/2010 12:39:01 | 27.321 |
| 12/5/2010 06:24:01 | 23.814 | 12/3/2010 12:59:01 | 27.321 |
| 12/5/2010 06:44:01 | 24.877 | 12/3/2010 13:19:01 | 27.321 |
| 12/5/2010 07:04:01 | 26.064 | 12/3/2010 13:39:01 | 27.321 |
| 12/5/2010 07:24:01 | 27.751 | 12/3/2010 13:59:01 | 27.384 |
| 12/5/2010 07:44:01 | 29.374 | 12/3/2010 14:19:01 | 27.384 |
| 12/5/2010 08:04:01 | 30.373 | 12/3/2010 14:39:01 | 27.384 |

|                    |        |                    |        |
|--------------------|--------|--------------------|--------|
| 12/5/2010 08:24:01 | 28.813 | 12/3/2010 14:59:01 | 27.446 |
| 12/5/2010 08:44:01 | 28.438 | 12/3/2010 15:19:01 | 27.446 |
| 12/5/2010 09:04:01 | 28.813 | 12/3/2010 15:39:01 | 27.446 |
| 12/5/2010 09:24:01 | 30.311 | 12/3/2010 15:59:01 | 27.446 |
| 12/5/2010 09:44:01 | 31.558 | 12/3/2010 16:19:01 | 27.509 |
| 12/5/2010 10:04:01 | 31.122 | 12/3/2010 16:39:01 | 27.509 |
| 12/5/2010 10:24:01 | 34.115 | 12/3/2010 16:59:01 | 27.509 |
| 12/5/2010 10:44:01 | 35.299 | 12/3/2010 17:19:01 | 27.571 |
| 12/5/2010 11:04:01 | 33.367 | 12/3/2010 17:39:01 | 27.571 |
| 12/5/2010 11:24:01 | 34.115 | 12/3/2010 17:59:01 | 27.571 |
| 12/5/2010 11:44:01 | 33.429 | 12/3/2010 18:19:01 | 27.634 |
| 12/5/2010 12:04:01 | 35.611 | 12/3/2010 18:39:01 | 27.634 |
| 12/5/2010 12:24:01 | 36.171 | 12/3/2010 18:59:01 | 27.634 |
| 12/5/2010 12:44:01 | 37.541 | 12/3/2010 19:19:01 | 27.634 |
| 12/5/2010 13:04:01 | 37.915 | 12/3/2010 19:39:01 | 27.696 |
| 12/5/2010 13:24:01 | 39.098 | 12/3/2010 19:59:01 | 27.696 |
| 12/5/2010 13:44:01 | 38.040 | 12/3/2010 20:19:01 | 27.696 |
| 12/5/2010 14:04:01 | 39.284 | 12/3/2010 20:39:01 | 27.696 |
| 12/5/2010 14:24:01 | 39.409 | 12/3/2010 20:59:01 | 27.696 |
| 12/5/2010 14:44:01 | 38.475 | 12/3/2010 21:19:01 | 27.696 |
| 12/5/2010 15:04:01 | 36.732 | 12/3/2010 21:39:01 | 27.696 |
| 12/5/2010 15:24:01 | 36.047 | 12/3/2010 21:59:01 | 27.696 |
| 12/5/2010 15:44:01 | 35.361 | 12/3/2010 22:19:01 | 27.696 |
| 12/5/2010 16:04:01 | 34.925 | 12/3/2010 22:39:01 | 27.696 |
| 12/5/2010 16:24:01 | 34.427 | 12/3/2010 22:59:01 | 27.696 |
| 12/5/2010 16:44:01 | 33.616 | 12/3/2010 23:19:01 | 27.696 |
| 12/5/2010 17:04:01 | 32.619 | 12/3/2010 23:39:01 | 27.696 |
| 12/5/2010 17:24:01 | 31.309 | 12/3/2010 23:59:01 | 27.634 |
| 12/5/2010 17:44:01 | 29.999 | 12/4/2010 00:19:01 | 27.634 |
| 12/5/2010 18:04:01 | 29.312 | 12/4/2010 00:39:01 | 27.634 |
| 12/5/2010 18:24:01 | 29.437 | 12/4/2010 00:59:01 | 27.634 |
| 12/5/2010 18:44:01 | 28.813 | 12/4/2010 01:19:01 | 27.634 |
| 12/5/2010 19:04:01 | 28.188 | 12/4/2010 01:39:01 | 27.634 |
| 12/5/2010 19:24:01 | 27.689 | 12/4/2010 01:59:01 | 27.571 |
| 12/5/2010 19:44:01 | 27.376 | 12/4/2010 02:19:01 | 27.571 |
| 12/5/2010 20:04:01 | 27.064 | 12/4/2010 02:39:01 | 27.571 |
| 12/5/2010 20:24:01 | 26.752 | 12/4/2010 02:59:01 | 27.571 |
| 12/5/2010 20:44:01 | 26.314 | 12/4/2010 03:19:01 | 27.509 |
| 12/5/2010 21:04:01 | 25.752 | 12/4/2010 03:39:01 | 27.509 |
| 12/5/2010 21:24:01 | 25.252 | 12/4/2010 03:59:01 | 27.509 |
| 12/5/2010 21:44:01 | 24.814 | 12/4/2010 04:19:01 | 27.509 |
| 12/5/2010 22:04:01 | 24.502 | 12/4/2010 04:39:01 | 27.446 |
| 12/5/2010 22:24:01 | 24.252 | 12/4/2010 04:59:01 | 27.446 |
| 12/5/2010 22:44:01 | 23.939 | 12/4/2010 05:19:01 | 27.446 |
| 12/5/2010 23:04:01 | 23.939 | 12/4/2010 05:39:01 | 27.446 |
| 12/5/2010 23:24:01 | 23.689 | 12/4/2010 05:59:01 | 27.384 |
| 12/5/2010 23:44:01 | 23.314 | 12/4/2010 06:19:01 | 27.384 |
| 12/6/2010 00:04:01 | 23.064 | 12/4/2010 06:39:01 | 27.384 |
| 12/6/2010 00:24:01 | 22.939 | 12/4/2010 06:59:01 | 27.384 |
| 12/6/2010 00:44:01 | 23.126 | 12/4/2010 07:19:01 | 27.384 |

|                    |        |                    |        |
|--------------------|--------|--------------------|--------|
| 12/6/2010 01:04:01 | 23.251 | 12/4/2010 07:39:01 | 27.321 |
| 12/6/2010 01:24:01 | 23.126 | 12/4/2010 07:59:01 | 27.321 |
| 12/6/2010 01:44:01 | 23.251 | 12/4/2010 08:19:01 | 27.321 |
| 12/6/2010 02:04:01 | 23.376 | 12/4/2010 08:39:01 | 27.321 |
| 12/6/2010 02:24:01 | 23.376 | 12/4/2010 08:59:01 | 27.321 |
| 12/6/2010 02:44:01 | 23.501 | 12/4/2010 09:19:01 | 27.259 |
| 12/6/2010 03:04:01 | 23.189 | 12/4/2010 09:39:01 | 27.259 |
| 12/6/2010 03:24:01 | 23.001 | 12/4/2010 09:59:01 | 27.259 |
| 12/6/2010 03:44:01 | 22.751 | 12/4/2010 10:19:01 | 27.259 |
| 12/6/2010 04:04:01 | 22.563 | 12/4/2010 10:39:01 | 27.259 |
| 12/6/2010 04:24:01 | 22.626 | 12/4/2010 10:59:01 | 27.259 |
| 12/6/2010 04:44:01 | 23.001 | 12/4/2010 11:19:01 | 27.259 |
| 12/6/2010 05:04:01 | 23.251 | 12/4/2010 11:39:01 | 27.259 |
| 12/6/2010 05:24:01 | 23.251 | 12/4/2010 11:59:01 | 27.259 |
| 12/6/2010 05:44:01 | 23.564 | 12/4/2010 12:19:01 | 27.259 |
| 12/6/2010 06:04:01 | 23.814 | 12/4/2010 12:39:01 | 27.259 |
| 12/6/2010 06:24:01 | 24.064 | 12/4/2010 12:59:01 | 27.321 |
| 12/6/2010 06:44:01 | 24.189 | 12/4/2010 13:19:01 | 27.321 |
| 12/6/2010 07:04:01 | 23.939 | 12/4/2010 13:39:01 | 27.321 |
| 12/6/2010 07:24:01 | 23.126 | 12/4/2010 13:59:01 | 27.384 |
| 12/6/2010 07:44:01 | 22.626 | 12/4/2010 14:19:01 | 27.384 |
| 12/6/2010 08:04:01 | 22.876 | 12/4/2010 14:39:01 | 27.384 |
| 12/6/2010 08:24:01 | 24.252 | 12/4/2010 14:59:01 | 27.384 |
| 12/6/2010 08:44:01 | 23.939 | 12/4/2010 15:19:01 | 27.446 |
| 12/6/2010 09:04:01 | 24.377 | 12/4/2010 15:39:01 | 27.446 |
| 12/6/2010 09:24:01 | 25.189 | 12/4/2010 15:59:01 | 27.509 |
| 12/6/2010 09:44:01 | 27.501 | 12/4/2010 16:19:01 | 27.509 |
| 12/6/2010 10:04:01 | 26.627 | 12/4/2010 16:39:01 | 27.571 |
| 12/6/2010 10:24:01 | 28.126 | 12/4/2010 16:59:01 | 27.571 |
| 12/6/2010 10:44:01 | 30.685 | 12/4/2010 17:19:01 | 27.634 |
| 12/6/2010 11:04:01 | 30.498 | 12/4/2010 17:39:01 | 27.634 |
| 12/6/2010 11:24:01 | 29.936 | 12/4/2010 17:59:01 | 27.696 |
| 12/6/2010 11:44:01 | 32.369 | 12/4/2010 18:19:01 | 27.696 |
| 12/6/2010 12:04:01 | 33.305 | 12/4/2010 18:39:01 | 27.696 |
| 12/6/2010 12:24:01 | 33.928 | 12/4/2010 18:59:01 | 27.759 |
| 12/6/2010 12:44:01 | 34.551 | 12/4/2010 19:19:01 | 27.759 |
| 12/6/2010 13:04:01 | 34.489 | 12/4/2010 19:39:01 | 27.759 |
| 12/6/2010 13:24:01 | 33.492 | 12/4/2010 19:59:01 | 27.759 |
| 12/6/2010 13:44:01 | 35.237 | 12/4/2010 20:19:01 | 27.821 |
| 12/6/2010 14:04:01 | 36.234 | 12/4/2010 20:39:01 | 27.821 |
| 12/6/2010 14:24:01 | 35.673 | 12/4/2010 20:59:01 | 27.821 |
| 12/6/2010 14:44:01 | 35.424 | 12/4/2010 21:19:01 | 27.821 |
| 12/6/2010 15:04:01 | 34.614 | 12/4/2010 21:39:01 | 27.821 |
| 12/6/2010 15:24:01 | 34.240 | 12/4/2010 21:59:01 | 27.821 |
| 12/6/2010 15:44:01 | 33.429 | 12/4/2010 22:19:01 | 27.821 |
| 12/6/2010 16:04:01 | 32.681 | 12/4/2010 22:39:01 | 27.759 |
| 12/6/2010 16:24:01 | 32.057 | 12/4/2010 22:59:01 | 27.759 |
| 12/6/2010 16:44:01 | 31.434 | 12/4/2010 23:19:01 | 27.759 |
| 12/6/2010 17:04:01 | 31.184 | 12/4/2010 23:39:01 | 27.759 |
| 12/6/2010 17:24:01 | 30.747 | 12/4/2010 23:59:01 | 27.759 |

|                    |        |                    |        |
|--------------------|--------|--------------------|--------|
| 12/6/2010 17:44:01 | 29.811 | 12/5/2010 00:19:01 | 27.696 |
| 12/6/2010 18:04:01 | 28.937 | 12/5/2010 00:39:01 | 27.696 |
| 12/6/2010 18:24:01 | 28.251 | 12/5/2010 00:59:01 | 27.696 |
| 12/6/2010 18:44:01 | 27.626 | 12/5/2010 01:19:01 | 27.696 |
| 12/6/2010 19:04:01 | 27.189 | 12/5/2010 01:39:01 | 27.634 |
| 12/6/2010 19:24:01 | 26.814 | 12/5/2010 01:59:01 | 27.634 |
| 12/6/2010 19:44:01 | 26.439 | 12/5/2010 02:19:01 | 27.634 |
| 12/6/2010 20:04:01 | 26.189 | 12/5/2010 02:39:01 | 27.634 |
| 12/6/2010 20:24:01 | 25.814 | 12/5/2010 02:59:01 | 27.571 |
| 12/6/2010 20:44:01 | 25.439 | 12/5/2010 03:19:01 | 27.571 |
| 12/6/2010 21:04:01 | 25.064 | 12/5/2010 03:39:01 | 27.571 |
| 12/6/2010 21:24:01 | 24.689 | 12/5/2010 03:59:01 | 27.509 |
| 12/6/2010 21:44:01 | 24.314 | 12/5/2010 04:19:01 | 27.509 |
| 12/6/2010 22:04:01 | 24.002 | 12/5/2010 04:39:01 | 27.509 |
| 12/6/2010 22:24:01 | 23.877 | 12/5/2010 04:59:01 | 27.446 |
| 12/6/2010 22:44:01 | 23.627 | 12/5/2010 05:19:01 | 27.446 |
| 12/6/2010 23:04:01 | 23.376 | 12/5/2010 05:39:01 | 27.446 |
| 12/6/2010 23:24:01 | 23.126 | 12/5/2010 05:59:01 | 27.446 |
| 12/6/2010 23:44:01 | 23.251 | 12/5/2010 06:19:01 | 27.384 |
| 12/7/2010 00:04:01 | 23.251 | 12/5/2010 06:39:01 | 27.384 |
| 12/7/2010 00:24:01 | 23.439 | 12/5/2010 06:59:01 | 27.384 |
| 12/7/2010 00:44:01 | 23.501 | 12/5/2010 07:19:01 | 27.321 |
| 12/7/2010 01:04:01 | 23.439 | 12/5/2010 07:39:01 | 27.321 |
| 12/7/2010 01:24:01 | 23.126 | 12/5/2010 07:59:01 | 27.321 |
| 12/7/2010 01:44:01 | 22.876 | 12/5/2010 08:19:01 | 27.321 |
| 12/7/2010 02:04:01 | 22.626 | 12/5/2010 08:39:01 | 27.259 |
| 12/7/2010 02:24:01 | 22.376 | 12/5/2010 08:59:01 | 27.259 |
| 12/7/2010 02:44:01 | 22.188 | 12/5/2010 09:19:01 | 27.259 |
| 12/7/2010 03:04:01 | 22.000 | 12/5/2010 09:39:01 | 27.259 |
| 12/7/2010 03:24:01 | 21.875 | 12/5/2010 09:59:01 | 27.197 |
| 12/7/2010 03:44:01 | 21.750 | 12/5/2010 10:19:01 | 27.197 |
| 12/7/2010 04:04:01 | 21.562 | 12/5/2010 10:39:01 | 27.197 |
| 12/7/2010 04:24:01 | 21.500 | 12/5/2010 10:59:01 | 27.197 |
| 12/7/2010 04:44:01 | 21.375 | 12/5/2010 11:19:01 | 27.197 |
| 12/7/2010 05:04:01 | 21.249 | 12/5/2010 11:39:01 | 27.197 |
| 12/7/2010 05:24:01 | 25.189 | 12/5/2010 11:59:01 | 27.197 |
| 12/7/2010 05:44:01 | 26.939 | 12/5/2010 12:19:01 | 27.197 |
| 12/7/2010 06:04:01 | 27.126 | 12/5/2010 12:39:01 | 27.197 |
| 12/7/2010 06:24:01 | 27.751 | 12/5/2010 12:59:01 | 27.259 |
| 12/7/2010 06:44:01 | 28.500 | 12/5/2010 13:19:01 | 27.259 |
| 12/7/2010 07:04:01 | 28.750 | 12/5/2010 13:39:01 | 27.259 |
| 12/7/2010 07:24:01 | 29.749 | 12/5/2010 13:59:01 | 27.259 |
| 12/7/2010 07:44:01 | 29.936 | 12/5/2010 14:19:01 | 27.321 |
| 12/7/2010 08:04:01 | 30.435 | 12/5/2010 14:39:01 | 27.321 |
| 12/7/2010 08:24:01 | 31.434 | 12/5/2010 14:59:01 | 27.321 |
| 12/7/2010 08:44:01 | 30.997 | 12/5/2010 15:19:01 | 27.384 |
| 12/7/2010 09:04:01 | 31.621 | 12/5/2010 15:39:01 | 27.384 |
| 12/7/2010 09:24:01 | 32.931 | 12/5/2010 15:59:01 | 27.384 |
| 12/7/2010 09:44:01 | 31.558 | 12/5/2010 16:19:01 | 27.446 |
| 12/7/2010 10:04:01 | 31.995 | 12/5/2010 16:39:01 | 27.446 |

|                    |        |                    |        |
|--------------------|--------|--------------------|--------|
| 12/7/2010 10:24:01 | 32.556 | 12/5/2010 16:59:01 | 27.509 |
| 12/7/2010 10:44:01 | 34.676 | 12/5/2010 17:19:01 | 27.509 |
| 12/7/2010 11:04:01 | 33.803 | 12/5/2010 17:39:01 | 27.571 |
| 12/7/2010 11:24:01 | 35.984 | 12/5/2010 17:59:01 | 27.571 |
| 12/7/2010 11:44:01 | 34.551 | 12/5/2010 18:19:01 | 27.634 |
| 12/7/2010 12:04:01 | 34.614 | 12/5/2010 18:39:01 | 27.634 |
| 12/7/2010 12:24:01 | 35.798 | 12/5/2010 18:59:01 | 27.696 |
| 12/7/2010 12:44:01 | 37.604 | 12/5/2010 19:19:01 | 27.696 |
| 12/7/2010 13:04:01 | 37.106 | 12/5/2010 19:39:01 | 27.696 |
| 12/7/2010 13:24:01 | 36.171 | 12/5/2010 19:59:01 | 27.696 |
| 12/7/2010 13:44:01 | 38.351 | 12/5/2010 20:19:01 | 27.759 |
| 12/7/2010 14:04:01 | 38.289 | 12/5/2010 20:39:01 | 27.759 |
| 12/7/2010 14:24:01 | 38.351 | 12/5/2010 20:59:01 | 27.759 |
| 12/7/2010 14:44:01 | 36.981 | 12/5/2010 21:19:01 | 27.759 |
| 12/7/2010 15:04:01 | 35.424 | 12/5/2010 21:39:01 | 27.759 |
| 12/7/2010 15:24:01 | 34.427 | 12/5/2010 21:59:01 | 27.759 |
| 12/7/2010 15:44:01 | 33.803 | 12/5/2010 22:19:01 | 27.759 |
| 12/7/2010 16:04:01 | 33.305 | 12/5/2010 22:39:01 | 27.759 |
| 12/7/2010 16:24:01 | 31.870 | 12/5/2010 22:59:01 | 27.759 |
| 12/7/2010 16:44:01 | 31.683 | 12/5/2010 23:19:01 | 27.759 |
| 12/7/2010 17:04:01 | 31.621 | 12/5/2010 23:39:01 | 27.759 |
| 12/7/2010 17:24:01 | 30.935 | 12/5/2010 23:59:01 | 27.696 |
| 12/7/2010 17:44:01 | 30.810 | 12/6/2010 00:19:01 | 27.696 |
| 12/7/2010 18:04:01 | 29.499 | 12/6/2010 00:39:01 | 27.696 |
| 12/7/2010 18:24:01 | 28.438 | 12/6/2010 00:59:01 | 27.696 |
| 12/7/2010 18:44:01 | 27.689 | 12/6/2010 01:19:01 | 27.696 |
| 12/7/2010 19:04:01 | 27.251 | 12/6/2010 01:39:01 | 27.696 |
| 12/7/2010 19:24:01 | 26.939 | 12/6/2010 01:59:01 | 27.696 |
| 12/7/2010 19:44:01 | 26.752 | 12/6/2010 02:19:01 | 27.634 |
| 12/7/2010 20:04:01 | 26.564 | 12/6/2010 02:39:01 | 27.634 |
| 12/7/2010 20:24:01 | 26.314 | 12/6/2010 02:59:01 | 27.634 |
| 12/7/2010 20:44:01 | 26.127 | 12/6/2010 03:19:01 | 27.634 |
| 12/7/2010 21:04:01 | 26.189 | 12/6/2010 03:39:01 | 27.571 |
| 12/7/2010 21:24:01 | 26.127 | 12/6/2010 03:59:01 | 27.571 |
| 12/7/2010 21:44:01 | 25.752 | 12/6/2010 04:19:01 | 27.571 |
| 12/7/2010 22:04:01 | 25.377 | 12/6/2010 04:39:01 | 27.571 |
| 12/7/2010 22:24:01 | 25.252 | 12/6/2010 04:59:01 | 27.571 |
| 12/7/2010 22:44:01 | 25.252 | 12/6/2010 05:19:01 | 27.509 |
| 12/7/2010 23:04:01 | 25.064 | 12/6/2010 05:39:01 | 27.509 |
| 12/7/2010 23:24:01 | 24.939 | 12/6/2010 05:59:01 | 27.509 |
| 12/7/2010 23:44:01 | 24.939 | 12/6/2010 06:19:01 | 27.509 |
| 12/8/2010 00:04:01 | 24.877 | 12/6/2010 06:39:01 | 27.446 |
| 12/8/2010 00:24:01 | 25.002 | 12/6/2010 06:59:01 | 27.446 |
| 12/8/2010 00:44:01 | 25.127 | 12/6/2010 07:19:01 | 27.446 |
| 12/8/2010 01:04:01 | 25.189 | 12/6/2010 07:39:01 | 27.446 |
| 12/8/2010 01:24:01 | 25.189 | 12/6/2010 07:59:01 | 27.446 |
| 12/8/2010 01:44:01 | 25.002 | 12/6/2010 08:19:01 | 27.384 |
| 12/8/2010 02:04:01 | 24.752 | 12/6/2010 08:39:01 | 27.384 |
| 12/8/2010 02:24:01 | 24.564 | 12/6/2010 08:59:01 | 27.384 |
| 12/8/2010 02:44:01 | 24.564 | 12/6/2010 09:19:01 | 27.384 |

|                    |        |                    |        |
|--------------------|--------|--------------------|--------|
| 12/8/2010 03:04:01 | 24.564 | 12/6/2010 09:39:01 | 27.321 |
| 12/8/2010 03:24:01 | 24.502 | 12/6/2010 09:59:01 | 27.321 |
| 12/8/2010 03:44:01 | 24.377 | 12/6/2010 10:19:01 | 27.321 |
| 12/8/2010 04:04:01 | 24.377 | 12/6/2010 10:39:01 | 27.321 |
| 12/8/2010 04:24:01 | 24.314 | 12/6/2010 10:59:01 | 27.259 |
| 12/8/2010 04:44:01 | 24.314 | 12/6/2010 11:19:01 | 27.259 |
| 12/8/2010 05:04:01 | 24.252 | 12/6/2010 11:39:01 | 27.259 |
| 12/8/2010 05:24:01 | 24.252 | 12/6/2010 11:59:01 | 27.259 |
| 12/8/2010 05:44:01 | 24.377 | 12/6/2010 12:19:01 | 27.259 |
| 12/8/2010 06:04:01 | 24.689 | 12/6/2010 12:39:01 | 27.259 |
| 12/8/2010 06:24:01 | 24.877 | 12/6/2010 12:59:01 | 27.259 |
| 12/8/2010 06:44:01 | 25.127 | 12/6/2010 13:19:01 | 27.259 |
| 12/8/2010 07:04:01 | 25.377 | 12/6/2010 13:39:01 | 27.259 |
| 12/8/2010 07:24:01 | 25.752 | 12/6/2010 13:59:01 | 27.259 |
| 12/8/2010 07:44:01 | 26.439 | 12/6/2010 14:19:01 | 27.259 |
| 12/8/2010 08:04:01 | 26.877 | 12/6/2010 14:39:01 | 27.259 |
| 12/8/2010 08:24:01 | 27.189 | 12/6/2010 14:59:01 | 27.321 |
| 12/8/2010 08:44:01 | 28.063 | 12/6/2010 15:19:01 | 27.321 |
| 12/8/2010 09:04:01 | 27.751 | 12/6/2010 15:39:01 | 27.321 |
| 12/8/2010 09:24:01 | 28.126 | 12/6/2010 15:59:01 | 27.321 |
| 12/8/2010 09:44:01 | 29.499 | 12/6/2010 16:19:01 | 27.384 |
| 12/8/2010 10:04:01 | 29.874 | 12/6/2010 16:39:01 | 27.384 |
| 12/8/2010 10:24:01 | 30.061 | 12/6/2010 16:59:01 | 27.446 |
| 12/8/2010 10:44:01 | 30.872 | 12/6/2010 17:19:01 | 27.446 |
| 12/8/2010 11:04:01 | 31.247 | 12/6/2010 17:39:01 | 27.509 |
| 12/8/2010 11:24:01 | 32.369 | 12/6/2010 17:59:01 | 27.509 |
| 12/8/2010 11:44:01 | 32.120 | 12/6/2010 18:19:01 | 27.571 |
| 12/8/2010 12:04:01 | 29.936 | 12/6/2010 18:39:01 | 27.571 |
| 12/8/2010 12:24:01 | 27.876 | 12/6/2010 18:59:01 | 27.571 |
| 12/8/2010 12:44:01 | 29.000 | 12/6/2010 19:19:01 | 27.634 |
| 12/8/2010 13:04:01 | 31.434 | 12/6/2010 19:39:01 | 27.634 |
| 12/8/2010 13:24:01 | 31.746 | 12/6/2010 19:59:01 | 27.634 |
| 12/8/2010 13:44:01 | 31.309 | 12/6/2010 20:19:01 | 27.634 |
| 12/8/2010 14:04:01 | 30.623 | 12/6/2010 20:39:01 | 27.634 |
| 12/8/2010 14:24:01 | 29.624 | 12/6/2010 20:59:01 | 27.696 |
| 12/8/2010 14:44:01 | 29.125 | 12/6/2010 21:19:01 | 27.696 |
| 12/8/2010 15:04:01 | 28.563 | 12/6/2010 21:39:01 | 27.696 |
| 12/8/2010 15:24:01 | 28.500 | 12/6/2010 21:59:01 | 27.696 |
| 12/8/2010 15:44:01 | 28.625 | 12/6/2010 22:19:01 | 27.696 |
| 12/8/2010 16:04:01 | 28.937 | 12/6/2010 22:39:01 | 27.696 |
| 12/8/2010 16:24:01 | 28.750 | 12/6/2010 22:59:01 | 27.696 |
| 12/8/2010 16:44:01 | 28.500 | 12/6/2010 23:19:01 | 27.696 |
| 12/8/2010 17:04:01 | 28.063 | 12/6/2010 23:39:01 | 27.634 |
| 12/8/2010 17:24:01 | 27.689 | 12/6/2010 23:59:01 | 27.634 |
| 12/8/2010 17:44:01 | 27.376 | 12/7/2010 00:19:01 | 27.634 |
| 12/8/2010 18:04:01 | 27.251 | 12/7/2010 00:39:01 | 27.634 |
| 12/8/2010 18:24:01 | 26.939 | 12/7/2010 00:59:01 | 27.634 |
| 12/8/2010 18:44:01 | 26.502 | 12/7/2010 01:19:01 | 27.634 |
| 12/8/2010 19:04:01 | 26.127 | 12/7/2010 01:39:01 | 27.634 |
| 12/8/2010 19:24:01 | 25.689 | 12/7/2010 01:59:01 | 27.571 |

|                    |        |                    |        |
|--------------------|--------|--------------------|--------|
| 12/8/2010 19:44:01 | 25.252 | 12/7/2010 02:19:01 | 27.571 |
| 12/8/2010 20:04:01 | 25.002 | 12/7/2010 02:39:01 | 27.571 |
| 12/8/2010 20:24:01 | 24.752 | 12/7/2010 02:59:01 | 27.571 |
| 12/8/2010 20:44:01 | 24.689 | 12/7/2010 03:19:01 | 27.509 |
| 12/8/2010 21:04:01 | 24.502 | 12/7/2010 03:39:01 | 27.509 |
| 12/8/2010 21:24:01 | 24.502 | 12/7/2010 03:59:01 | 27.509 |
| 12/8/2010 21:44:01 | 24.377 | 12/7/2010 04:19:01 | 27.509 |
| 12/8/2010 22:04:01 | 24.377 | 12/7/2010 04:39:01 | 27.509 |
| 12/8/2010 22:24:01 | 24.439 | 12/7/2010 04:59:01 | 27.446 |
| 12/8/2010 22:44:01 | 24.127 | 12/7/2010 05:19:01 | 27.446 |
| 12/8/2010 23:04:01 | 23.939 | 12/7/2010 05:39:01 | 27.446 |
| 12/8/2010 23:24:01 | 23.752 | 12/7/2010 05:59:01 | 27.446 |
| 12/8/2010 23:44:01 | 23.814 | 12/7/2010 06:19:01 | 27.384 |
| 12/9/2010 00:04:01 | 23.752 | 12/7/2010 06:39:01 | 27.384 |
| 12/9/2010 00:24:01 | 23.689 | 12/7/2010 06:59:01 | 27.384 |
| 12/9/2010 00:44:01 | 23.877 | 12/7/2010 07:19:01 | 27.321 |
| 12/9/2010 01:04:01 | 24.127 | 12/7/2010 07:39:01 | 27.321 |
| 12/9/2010 01:24:01 | 24.127 | 12/7/2010 07:59:01 | 27.321 |
| 12/9/2010 01:44:01 | 24.127 | 12/7/2010 08:19:01 | 27.321 |
| 12/9/2010 02:04:01 | 24.064 | 12/7/2010 08:39:01 | 27.259 |
| 12/9/2010 02:24:01 | 24.064 | 12/7/2010 08:59:01 | 27.259 |
| 12/9/2010 02:44:01 | 23.939 | 12/7/2010 09:19:01 | 27.259 |
| 12/9/2010 03:04:01 | 23.627 | 12/7/2010 09:39:01 | 27.259 |
| 12/9/2010 03:24:01 | 23.376 | 12/7/2010 09:59:01 | 27.197 |
| 12/9/2010 03:44:01 | 23.064 | 12/7/2010 10:19:01 | 27.197 |
| 12/9/2010 04:04:01 | 22.876 | 12/7/2010 10:39:01 | 27.197 |
| 12/9/2010 04:24:01 | 22.626 | 12/7/2010 10:59:01 | 27.197 |
| 12/9/2010 04:44:01 | 22.501 | 12/7/2010 11:19:01 | 27.197 |
| 12/9/2010 05:04:01 | 22.563 | 12/7/2010 11:39:01 | 27.197 |
| 12/9/2010 05:24:01 | 22.563 | 12/7/2010 11:59:01 | 27.197 |
| 12/9/2010 05:44:01 | 22.814 | 12/7/2010 12:19:01 | 27.197 |
| 12/9/2010 06:04:01 | 23.001 | 12/7/2010 12:39:01 | 27.197 |
| 12/9/2010 06:24:01 | 23.314 | 12/7/2010 12:59:01 | 27.259 |
| 12/9/2010 06:44:01 | 23.627 | 12/7/2010 13:19:01 | 27.259 |
| 12/9/2010 07:04:01 | 24.064 | 12/7/2010 13:39:01 | 27.259 |
| 12/9/2010 07:24:01 | 24.689 | 12/7/2010 13:59:01 | 27.259 |
| 12/9/2010 07:44:01 | 24.939 | 12/7/2010 14:19:01 | 27.321 |
| 12/9/2010 08:04:01 | 25.877 | 12/7/2010 14:39:01 | 27.321 |
| 12/9/2010 08:24:01 | 28.188 | 12/7/2010 14:59:01 | 27.321 |
| 12/9/2010 08:44:01 | 29.000 | 12/7/2010 15:19:01 | 27.321 |
| 12/9/2010 09:04:01 | 29.999 | 12/7/2010 15:39:01 | 27.384 |
| 12/9/2010 09:24:01 | 31.122 | 12/7/2010 15:59:01 | 27.384 |
| 12/9/2010 09:44:01 | 31.683 | 12/7/2010 16:19:01 | 27.446 |
| 12/9/2010 10:04:01 | 31.309 | 12/7/2010 16:39:01 | 27.446 |
| 12/9/2010 10:24:01 | 32.619 | 12/7/2010 16:59:01 | 27.509 |
| 12/9/2010 10:44:01 | 32.556 | 12/7/2010 17:19:01 | 27.509 |
| 12/9/2010 11:04:01 | 31.683 | 12/7/2010 17:39:01 | 27.509 |
| 12/9/2010 11:24:01 | 31.746 | 12/7/2010 17:59:01 | 27.571 |
| 12/9/2010 11:44:01 | 32.307 | 12/7/2010 18:19:01 | 27.571 |
| 12/9/2010 12:04:01 | 33.180 | 12/7/2010 18:39:01 | 27.571 |

|                     |        |                    |        |
|---------------------|--------|--------------------|--------|
| 12/9/2010 12:24:01  | 33.367 | 12/7/2010 18:59:01 | 27.634 |
| 12/9/2010 12:44:01  | 32.868 | 12/7/2010 19:19:01 | 27.634 |
| 12/9/2010 13:04:01  | 33.554 | 12/7/2010 19:39:01 | 27.634 |
| 12/9/2010 13:24:01  | 34.988 | 12/7/2010 19:59:01 | 27.634 |
| 12/9/2010 13:44:01  | 34.240 | 12/7/2010 20:19:01 | 27.696 |
| 12/9/2010 14:04:01  | 35.112 | 12/7/2010 20:39:01 | 27.696 |
| 12/9/2010 14:24:01  | 35.984 | 12/7/2010 20:59:01 | 27.696 |
| 12/9/2010 14:44:01  | 36.109 | 12/7/2010 21:19:01 | 27.696 |
| 12/9/2010 15:04:01  | 35.548 | 12/7/2010 21:39:01 | 27.696 |
| 12/9/2010 15:24:01  | 34.489 | 12/7/2010 21:59:01 | 27.696 |
| 12/9/2010 15:44:01  | 33.866 | 12/7/2010 22:19:01 | 27.696 |
| 12/9/2010 16:04:01  | 33.554 | 12/7/2010 22:39:01 | 27.696 |
| 12/9/2010 16:24:01  | 33.055 | 12/7/2010 22:59:01 | 27.696 |
| 12/9/2010 16:44:01  | 32.494 | 12/7/2010 23:19:01 | 27.696 |
| 12/9/2010 17:04:01  | 31.558 | 12/7/2010 23:39:01 | 27.634 |
| 12/9/2010 17:24:01  | 30.560 | 12/7/2010 23:59:01 | 27.634 |
| 12/9/2010 17:44:01  | 29.687 | 12/8/2010 00:19:01 | 27.634 |
| 12/9/2010 18:04:01  | 29.062 | 12/8/2010 00:39:01 | 27.634 |
| 12/9/2010 18:24:01  | 28.500 | 12/8/2010 00:59:01 | 27.634 |
| 12/9/2010 18:44:01  | 27.938 | 12/8/2010 01:19:01 | 27.634 |
| 12/9/2010 19:04:01  | 27.564 | 12/8/2010 01:39:01 | 27.634 |
| 12/9/2010 19:24:01  | 27.189 | 12/8/2010 01:59:01 | 27.571 |
| 12/9/2010 19:44:01  | 26.752 | 12/8/2010 02:19:01 | 27.571 |
| 12/9/2010 20:04:01  | 26.252 | 12/8/2010 02:39:01 | 27.571 |
| 12/9/2010 20:24:01  | 25.752 | 12/8/2010 02:59:01 | 27.571 |
| 12/9/2010 20:44:01  | 25.314 | 12/8/2010 03:19:01 | 27.571 |
| 12/9/2010 21:04:01  | 25.127 | 12/8/2010 03:39:01 | 27.571 |
| 12/9/2010 21:24:01  | 24.877 | 12/8/2010 03:59:01 | 27.571 |
| 12/9/2010 21:44:01  | 24.814 | 12/8/2010 04:19:01 | 27.571 |
| 12/9/2010 22:04:01  | 24.689 | 12/8/2010 04:39:01 | 27.571 |
| 12/9/2010 22:24:01  | 24.564 | 12/8/2010 04:59:01 | 27.509 |
| 12/9/2010 22:44:01  | 24.439 | 12/8/2010 05:19:01 | 27.509 |
| 12/9/2010 23:04:01  | 24.314 | 12/8/2010 05:39:01 | 27.509 |
| 12/9/2010 23:24:01  | 24.377 | 12/8/2010 05:59:01 | 27.509 |
| 12/9/2010 23:44:01  | 24.439 | 12/8/2010 06:19:01 | 27.509 |
| 12/10/2010 00:04:01 | 24.564 | 12/8/2010 06:39:01 | 27.509 |
| 12/10/2010 00:24:01 | 24.752 | 12/8/2010 06:59:01 | 27.446 |
| 12/10/2010 00:44:01 | 24.939 | 12/8/2010 07:19:01 | 27.446 |
| 12/10/2010 01:04:01 | 25.064 | 12/8/2010 07:39:01 | 27.446 |
| 12/10/2010 01:24:01 | 25.127 | 12/8/2010 07:59:01 | 27.446 |
| 12/10/2010 01:44:01 | 25.064 | 12/8/2010 08:19:01 | 27.446 |
| 12/10/2010 02:04:01 | 25.064 | 12/8/2010 08:39:01 | 27.446 |
| 12/10/2010 02:24:01 | 25.002 | 12/8/2010 08:59:01 | 27.384 |
| 12/10/2010 02:44:01 | 24.877 | 12/8/2010 09:19:01 | 27.384 |
| 12/10/2010 03:04:01 | 24.627 | 12/8/2010 09:39:01 | 27.384 |
| 12/10/2010 03:24:01 | 24.564 | 12/8/2010 09:59:01 | 27.384 |
| 12/10/2010 03:44:01 | 24.252 | 12/8/2010 10:19:01 | 27.384 |
| 12/10/2010 04:04:01 | 23.752 | 12/8/2010 10:39:01 | 27.384 |
| 12/10/2010 04:24:01 | 23.877 | 12/8/2010 10:59:01 | 27.384 |
| 12/10/2010 04:44:01 | 23.814 | 12/8/2010 11:19:01 | 27.384 |



|                     |        |                    |        |
|---------------------|--------|--------------------|--------|
| 12/10/2010 05:04:01 | 23.814 | 12/8/2010 11:39:01 | 27.384 |
| 12/10/2010 05:24:01 | 23.877 | 12/8/2010 11:59:01 | 27.384 |
| 12/10/2010 05:44:01 | 24.002 | 12/8/2010 12:19:01 | 27.384 |
| 12/10/2010 06:04:01 | 24.252 | 12/8/2010 12:39:01 | 27.384 |
| 12/10/2010 06:24:01 | 24.939 | 12/8/2010 12:59:01 | 27.384 |
| 12/10/2010 06:44:01 | 25.127 | 12/8/2010 13:19:01 | 27.384 |
| 12/10/2010 07:04:01 | 25.377 | 12/8/2010 13:39:01 | 27.384 |
| 12/10/2010 07:24:01 | 25.939 | 12/8/2010 13:59:01 | 27.384 |
| 12/10/2010 07:44:01 | 27.002 | 12/8/2010 14:19:01 | 27.384 |
| 12/10/2010 08:04:01 | 27.751 | 12/8/2010 14:39:01 | 27.384 |
| 12/10/2010 08:24:01 | 28.251 | 12/8/2010 14:59:01 | 27.384 |
| 12/10/2010 08:44:01 | 28.251 | 12/8/2010 15:19:01 | 27.446 |
| 12/10/2010 09:04:01 | 28.251 | 12/8/2010 15:39:01 | 27.446 |
| 12/10/2010 09:24:01 | 28.813 | 12/8/2010 15:59:01 | 27.446 |
| 12/10/2010 09:44:01 | 29.437 | 12/8/2010 16:19:01 | 27.446 |
| 12/10/2010 10:04:01 | 30.186 | 12/8/2010 16:39:01 | 27.446 |
| 12/10/2010 10:24:01 | 31.371 | 12/8/2010 16:59:01 | 27.446 |
| 12/10/2010 10:44:01 | 32.245 | 12/8/2010 17:19:01 | 27.446 |
| 12/10/2010 11:04:01 | 33.242 | 12/8/2010 17:39:01 | 27.446 |
| 12/10/2010 11:24:01 | 34.676 | 12/8/2010 17:59:01 | 27.509 |
| 12/10/2010 11:44:01 | 35.984 | 12/8/2010 18:19:01 | 27.509 |
| 12/10/2010 12:04:01 | 37.604 | 12/8/2010 18:39:01 | 27.509 |
| 12/10/2010 12:24:01 | 37.604 | 12/8/2010 18:59:01 | 27.509 |
| 12/10/2010 12:44:01 | 37.417 | 12/8/2010 19:19:01 | 27.509 |
| 12/10/2010 13:04:01 | 36.856 | 12/8/2010 19:39:01 | 27.509 |
| 12/10/2010 13:24:01 | 34.302 | 12/8/2010 19:59:01 | 27.509 |
| 12/10/2010 13:44:01 | 34.925 | 12/8/2010 20:19:01 | 27.509 |
| 12/10/2010 14:04:01 | 34.738 | 12/8/2010 20:39:01 | 27.509 |
| 12/10/2010 14:24:01 | 34.863 | 12/8/2010 20:59:01 | 27.509 |
| 12/10/2010 14:44:01 | 34.489 | 12/8/2010 21:19:01 | 27.509 |
| 12/10/2010 15:04:01 | 33.492 | 12/8/2010 21:39:01 | 27.509 |
| 12/10/2010 15:24:01 | 35.175 | 12/8/2010 21:59:01 | 27.509 |
| 12/10/2010 15:44:01 | 34.988 | 12/8/2010 22:19:01 | 27.509 |
| 12/10/2010 16:04:01 | 34.489 | 12/8/2010 22:39:01 | 27.509 |
| 12/10/2010 16:24:01 | 34.427 | 12/8/2010 22:59:01 | 27.509 |
| 12/10/2010 16:44:01 | 33.180 | 12/8/2010 23:19:01 | 27.446 |
| 12/10/2010 17:04:01 | 32.369 | 12/8/2010 23:39:01 | 27.446 |
| 12/10/2010 17:24:01 | 31.870 | 12/8/2010 23:59:01 | 27.446 |
| 12/10/2010 17:44:01 | 31.122 | 12/9/2010 00:19:01 | 27.446 |
| 12/10/2010 18:04:01 | 30.186 | 12/9/2010 00:39:01 | 27.446 |
| 12/10/2010 18:24:01 | 29.374 | 12/9/2010 00:59:01 | 27.446 |
| 12/10/2010 18:44:01 | 28.625 | 12/9/2010 01:19:01 | 27.446 |
| 12/10/2010 19:04:01 | 28.063 | 12/9/2010 01:39:01 | 27.446 |
| 12/10/2010 19:24:01 | 27.501 | 12/9/2010 01:59:01 | 27.446 |
| 12/10/2010 19:44:01 | 27.002 | 12/9/2010 02:19:01 | 27.384 |
| 12/10/2010 20:04:01 | 26.502 | 12/9/2010 02:39:01 | 27.384 |
| 12/10/2010 20:24:01 | 26.002 | 12/9/2010 02:59:01 | 27.384 |
| 12/10/2010 20:44:01 | 25.502 | 12/9/2010 03:19:01 | 27.384 |
| 12/10/2010 21:04:01 | 25.439 | 12/9/2010 03:39:01 | 27.384 |
| 12/10/2010 21:24:01 | 25.189 | 12/9/2010 03:59:01 | 27.321 |

|                     |        |                    |        |
|---------------------|--------|--------------------|--------|
| 12/10/2010 21:44:01 | 25.002 | 12/9/2010 04:19:01 | 27.321 |
| 12/10/2010 22:04:01 | 24.877 | 12/9/2010 04:39:01 | 27.321 |
| 12/10/2010 22:24:01 | 24.877 | 12/9/2010 04:59:01 | 27.321 |
| 12/10/2010 22:44:01 | 24.689 | 12/9/2010 05:19:01 | 27.321 |
| 12/10/2010 23:04:01 | 24.377 | 12/9/2010 05:39:01 | 27.321 |
| 12/10/2010 23:24:01 | 24.064 | 12/9/2010 05:59:01 | 27.259 |
| 12/10/2010 23:44:01 | 23.752 | 12/9/2010 06:19:01 | 27.259 |
| 12/11/2010 00:04:01 | 23.627 | 12/9/2010 06:39:01 | 27.259 |
| 12/11/2010 00:24:01 | 23.689 | 12/9/2010 06:59:01 | 27.259 |
| 12/11/2010 00:44:01 | 23.752 | 12/9/2010 07:19:01 | 27.259 |
| 12/11/2010 01:04:01 | 23.627 | 12/9/2010 07:39:01 | 27.259 |
| 12/11/2010 01:24:01 | 23.439 | 12/9/2010 07:59:01 | 27.197 |
| 12/11/2010 01:44:01 | 23.251 | 12/9/2010 08:19:01 | 27.197 |
| 12/11/2010 02:04:01 | 23.001 | 12/9/2010 08:39:01 | 27.197 |
| 12/11/2010 02:24:01 | 22.751 | 12/9/2010 08:59:01 | 27.197 |
| 12/11/2010 02:44:01 | 22.563 | 12/9/2010 09:19:01 | 27.197 |
| 12/11/2010 03:04:01 | 22.501 | 12/9/2010 09:39:01 | 27.134 |
| 12/11/2010 03:24:01 | 22.563 | 12/9/2010 09:59:01 | 27.134 |
| 12/11/2010 03:44:01 | 22.501 | 12/9/2010 10:19:01 | 27.134 |
| 12/11/2010 04:04:01 | 22.626 | 12/9/2010 10:39:01 | 27.134 |
| 12/11/2010 04:24:01 | 22.751 | 12/9/2010 10:59:01 | 27.134 |
| 12/11/2010 04:44:01 | 22.626 | 12/9/2010 11:19:01 | 27.134 |
| 12/11/2010 05:04:01 | 22.376 | 12/9/2010 11:39:01 | 27.134 |
| 12/11/2010 05:24:01 | 22.438 | 12/9/2010 11:59:01 | 27.134 |
| 12/11/2010 05:44:01 | 22.688 | 12/9/2010 12:19:01 | 27.134 |
| 12/11/2010 06:04:01 | 23.001 | 12/9/2010 12:39:01 | 27.134 |
| 12/11/2010 06:24:01 | 23.314 | 12/9/2010 12:59:01 | 27.134 |
| 12/11/2010 06:44:01 | 23.752 | 12/9/2010 13:19:01 | 27.134 |
| 12/11/2010 07:04:01 | 23.939 | 12/9/2010 13:39:01 | 27.134 |
| 12/11/2010 07:24:01 | 24.002 | 12/9/2010 13:59:01 | 27.134 |
| 12/11/2010 07:44:01 | 24.377 | 12/9/2010 14:19:01 | 27.197 |
| 12/11/2010 08:04:01 | 25.064 | 12/9/2010 14:39:01 | 27.197 |
| 12/11/2010 08:24:01 | 25.064 | 12/9/2010 14:59:01 | 27.197 |
| 12/11/2010 08:44:01 | 25.064 | 12/9/2010 15:19:01 | 27.197 |
| 12/11/2010 09:04:01 | 25.377 | 12/9/2010 15:39:01 | 27.197 |
| 12/11/2010 09:24:01 | 27.751 | 12/9/2010 15:59:01 | 27.259 |
| 12/11/2010 09:44:01 | 29.749 | 12/9/2010 16:19:01 | 27.259 |
| 12/11/2010 10:04:01 | 31.184 | 12/9/2010 16:39:01 | 27.259 |
| 12/11/2010 10:24:01 | 30.685 | 12/9/2010 16:59:01 | 27.321 |
| 12/11/2010 10:44:01 | 30.997 | 12/9/2010 17:19:01 | 27.321 |
| 12/11/2010 11:04:01 | 30.685 | 12/9/2010 17:39:01 | 27.321 |
| 12/11/2010 11:24:01 | 31.746 | 12/9/2010 17:59:01 | 27.321 |
| 12/11/2010 11:44:01 | 30.435 | 12/9/2010 18:19:01 | 27.384 |
| 12/11/2010 12:04:01 | 31.746 | 12/9/2010 18:39:01 | 27.384 |
| 12/11/2010 12:24:01 | 30.373 | 12/9/2010 18:59:01 | 27.384 |
| 12/11/2010 12:44:01 | 30.186 | 12/9/2010 19:19:01 | 27.446 |
| 12/11/2010 13:04:01 | 30.123 | 12/9/2010 19:39:01 | 27.446 |
| 12/11/2010 13:24:01 | 29.811 | 12/9/2010 19:59:01 | 27.446 |
| 12/11/2010 13:44:01 | 29.437 | 12/9/2010 20:19:01 | 27.446 |
| 12/11/2010 14:04:01 | 29.437 | 12/9/2010 20:39:01 | 27.446 |

|                     |        |                     |        |
|---------------------|--------|---------------------|--------|
| 12/11/2010 14:24:01 | 29.499 | 12/9/2010 20:59:01  | 27.446 |
| 12/11/2010 14:44:01 | 29.562 | 12/9/2010 21:19:01  | 27.446 |
| 12/11/2010 15:04:01 | 29.562 | 12/9/2010 21:39:01  | 27.446 |
| 12/11/2010 15:24:01 | 29.187 | 12/9/2010 21:59:01  | 27.446 |
| 12/11/2010 15:44:01 | 30.747 | 12/9/2010 22:19:01  | 27.446 |
| 12/11/2010 16:04:01 | 31.558 | 12/9/2010 22:39:01  | 27.446 |
| 12/11/2010 16:24:01 | 31.059 | 12/9/2010 22:59:01  | 27.446 |
| 12/11/2010 16:44:01 | 30.311 | 12/9/2010 23:19:01  | 27.446 |
| 12/11/2010 17:04:01 | 29.749 | 12/9/2010 23:39:01  | 27.446 |
| 12/11/2010 17:24:01 | 29.312 | 12/9/2010 23:59:01  | 27.446 |
| 12/11/2010 17:44:01 | 28.688 | 12/10/2010 00:19:01 | 27.446 |
| 12/11/2010 18:04:01 | 28.001 | 12/10/2010 00:39:01 | 27.446 |
| 12/11/2010 18:24:01 | 26.814 | 12/10/2010 00:59:01 | 27.446 |
| 12/11/2010 18:44:01 | 25.752 | 12/10/2010 01:19:01 | 27.446 |
| 12/11/2010 19:04:01 | 25.002 | 12/10/2010 01:39:01 | 27.446 |
| 12/11/2010 19:24:01 | 24.502 | 12/10/2010 01:59:01 | 27.446 |
| 12/11/2010 19:44:01 | 24.064 | 12/10/2010 02:19:01 | 27.384 |
| 12/11/2010 20:04:01 | 23.689 | 12/10/2010 02:39:01 | 27.384 |
| 12/11/2010 20:24:01 | 23.564 | 12/10/2010 02:59:01 | 27.384 |
| 12/11/2010 20:44:01 | 23.564 | 12/10/2010 03:19:01 | 27.384 |
| 12/11/2010 21:04:01 | 23.376 | 12/10/2010 03:39:01 | 27.384 |
| 12/11/2010 21:24:01 | 23.251 | 12/10/2010 03:59:01 | 27.384 |
| 12/11/2010 21:44:01 | 23.126 | 12/10/2010 04:19:01 | 27.384 |
| 12/11/2010 22:04:01 | 23.064 | 12/10/2010 04:39:01 | 27.384 |
| 12/11/2010 22:24:01 | 23.001 | 12/10/2010 04:59:01 | 27.321 |
| 12/11/2010 22:44:01 | 22.876 | 12/10/2010 05:19:01 | 27.321 |
| 12/11/2010 23:04:01 | 23.126 | 12/10/2010 05:39:01 | 27.321 |
| 12/11/2010 23:24:01 | 23.314 | 12/10/2010 05:59:01 | 27.321 |
| 12/11/2010 23:44:01 | 23.251 | 12/10/2010 06:19:01 | 27.321 |
| 12/12/2010 00:04:01 | 23.251 | 12/10/2010 06:39:01 | 27.321 |
| 12/12/2010 00:24:01 | 23.376 | 12/10/2010 06:59:01 | 27.321 |
| 12/12/2010 00:44:01 | 23.376 | 12/10/2010 07:19:01 | 27.259 |
| 12/12/2010 01:04:01 | 23.251 | 12/10/2010 07:39:01 | 27.259 |
| 12/12/2010 01:24:01 | 23.126 | 12/10/2010 07:59:01 | 27.259 |
| 12/12/2010 01:44:01 | 23.126 | 12/10/2010 08:19:01 | 27.259 |
| 12/12/2010 02:04:01 | 23.251 | 12/10/2010 08:39:01 | 27.259 |
| 12/12/2010 02:24:01 | 23.376 | 12/10/2010 08:59:01 | 27.197 |
| 12/12/2010 02:44:01 | 23.251 | 12/10/2010 09:19:01 | 27.259 |
| 12/12/2010 03:04:01 | 23.376 | 12/10/2010 09:39:01 | 27.197 |
| 12/12/2010 03:24:01 | 23.501 | 12/10/2010 09:59:01 | 27.197 |
| 12/12/2010 03:44:01 | 23.627 | 12/10/2010 10:19:01 | 27.197 |
| 12/12/2010 04:04:01 | 23.564 | 12/10/2010 10:39:01 | 27.197 |
| 12/12/2010 04:24:01 | 23.439 | 12/10/2010 10:59:01 | 27.197 |
| 12/12/2010 04:44:01 | 23.376 | 12/10/2010 11:19:01 | 27.197 |
| 12/12/2010 05:04:01 | 23.189 | 12/10/2010 11:39:01 | 27.197 |
| 12/12/2010 05:24:01 | 23.064 | 12/10/2010 11:59:01 | 27.197 |
| 12/12/2010 05:44:01 | 23.001 | 12/10/2010 12:19:01 | 27.197 |
| 12/12/2010 06:04:01 | 23.314 | 12/10/2010 12:39:01 | 27.197 |
| 12/12/2010 06:24:01 | 23.814 | 12/10/2010 12:59:01 | 27.197 |
| 12/12/2010 06:44:01 | 24.502 | 12/10/2010 13:19:01 | 27.197 |

|                     |        |                     |        |
|---------------------|--------|---------------------|--------|
| 12/12/2010 07:04:01 | 25.439 | 12/10/2010 13:39:01 | 27.197 |
| 12/12/2010 07:24:01 | 25.689 | 12/10/2010 13:59:01 | 27.197 |
| 12/12/2010 07:44:01 | 26.377 | 12/10/2010 14:19:01 | 27.197 |
| 12/12/2010 08:04:01 | 27.689 | 12/10/2010 14:39:01 | 27.197 |
| 12/12/2010 08:24:01 | 28.313 | 12/10/2010 14:59:01 | 27.259 |
| 12/12/2010 08:44:01 | 28.688 | 12/10/2010 15:19:01 | 27.259 |
| 12/12/2010 09:04:01 | 28.937 | 12/10/2010 15:39:01 | 27.259 |
| 12/12/2010 09:24:01 | 31.059 | 12/10/2010 15:59:01 | 27.259 |
| 12/12/2010 09:44:01 | 33.118 | 12/10/2010 16:19:01 | 27.321 |
| 12/12/2010 10:04:01 | 32.931 | 12/10/2010 16:39:01 | 27.321 |
| 12/12/2010 10:24:01 | 33.492 | 12/10/2010 16:59:01 | 27.321 |
| 12/12/2010 10:44:01 | 31.933 | 12/10/2010 17:19:01 | 27.321 |
| 12/12/2010 11:04:01 | 31.059 | 12/10/2010 17:39:01 | 27.384 |
| 12/12/2010 11:24:01 | 33.055 | 12/10/2010 17:59:01 | 27.384 |
| 12/12/2010 11:44:01 | 35.361 | 12/10/2010 18:19:01 | 27.384 |
| 12/12/2010 12:04:01 | 34.364 | 12/10/2010 18:39:01 | 27.446 |
| 12/12/2010 12:24:01 | 36.047 | 12/10/2010 18:59:01 | 27.446 |
| 12/12/2010 12:44:01 | 35.237 | 12/10/2010 19:19:01 | 27.446 |
| 12/12/2010 13:04:01 | 35.112 | 12/10/2010 19:39:01 | 27.446 |
| 12/12/2010 13:24:01 | 37.666 | 12/10/2010 19:59:01 | 27.446 |
| 12/12/2010 13:44:01 | 38.040 | 12/10/2010 20:19:01 | 27.446 |
| 12/12/2010 14:04:01 | 35.486 | 12/10/2010 20:39:01 | 27.509 |
| 12/12/2010 14:24:01 | 34.801 | 12/10/2010 20:59:01 | 27.509 |
| 12/12/2010 14:44:01 | 35.984 | 12/10/2010 21:19:01 | 27.509 |
| 12/12/2010 15:04:01 | 34.364 | 12/10/2010 21:39:01 | 27.509 |
| 12/12/2010 15:24:01 | 32.619 | 12/10/2010 21:59:01 | 27.509 |
| 12/12/2010 15:44:01 | 31.621 | 12/10/2010 22:19:01 | 27.509 |
| 12/12/2010 16:04:01 | 32.743 | 12/10/2010 22:39:01 | 27.509 |
| 12/12/2010 16:24:01 | 32.806 | 12/10/2010 22:59:01 | 27.509 |
| 12/12/2010 16:44:01 | 32.494 | 12/10/2010 23:19:01 | 27.509 |
| 12/12/2010 17:04:01 | 32.432 | 12/10/2010 23:39:01 | 27.509 |
| 12/12/2010 17:24:01 | 31.683 | 12/10/2010 23:59:01 | 27.509 |
| 12/12/2010 17:44:01 | 30.498 | 12/11/2010 00:19:01 | 27.509 |
| 12/12/2010 18:04:01 | 29.999 | 12/11/2010 00:39:01 | 27.446 |
| 12/12/2010 18:24:01 | 29.374 | 12/11/2010 00:59:01 | 27.446 |
| 12/12/2010 18:44:01 | 28.750 | 12/11/2010 01:19:01 | 27.446 |
| 12/12/2010 19:04:01 | 28.063 | 12/11/2010 01:39:01 | 27.446 |
| 12/12/2010 19:24:01 | 27.251 | 12/11/2010 01:59:01 | 27.446 |
| 12/12/2010 19:44:01 | 26.939 | 12/11/2010 02:19:01 | 27.446 |
| 12/12/2010 20:04:01 | 26.814 | 12/11/2010 02:39:01 | 27.446 |
| 12/12/2010 20:24:01 | 26.564 | 12/11/2010 02:59:01 | 27.446 |
| 12/12/2010 20:44:01 | 25.939 | 12/11/2010 03:19:01 | 27.384 |
| 12/12/2010 21:04:01 | 25.377 | 12/11/2010 03:39:01 | 27.384 |
| 12/12/2010 21:24:01 | 25.064 | 12/11/2010 03:59:01 | 27.384 |
| 12/12/2010 21:44:01 | 24.752 | 12/11/2010 04:19:01 | 27.384 |
| 12/12/2010 22:04:01 | 24.502 | 12/11/2010 04:39:01 | 27.384 |
| 12/12/2010 22:24:01 | 24.314 | 12/11/2010 04:59:01 | 27.384 |
| 12/12/2010 22:44:01 | 24.127 | 12/11/2010 05:19:01 | 27.321 |
| 12/12/2010 23:04:01 | 23.877 | 12/11/2010 05:39:01 | 27.321 |
| 12/12/2010 23:24:01 | 23.752 | 12/11/2010 05:59:01 | 27.321 |

|                     |        |                     |        |
|---------------------|--------|---------------------|--------|
| 12/12/2010 23:44:01 | 23.877 | 12/11/2010 06:19:01 | 27.321 |
| 12/13/2010 00:04:01 | 24.002 | 12/11/2010 06:39:01 | 27.259 |
| 12/13/2010 00:24:01 | 24.252 | 12/11/2010 06:59:01 | 27.259 |
| 12/13/2010 00:44:01 | 24.252 | 12/11/2010 07:19:01 | 27.259 |
| 12/13/2010 01:04:01 | 24.314 | 12/11/2010 07:39:01 | 27.259 |
| 12/13/2010 01:24:01 | 24.189 | 12/11/2010 07:59:01 | 27.259 |
| 12/13/2010 01:44:01 | 24.002 | 12/11/2010 08:19:01 | 27.197 |
| 12/13/2010 02:04:01 | 24.064 | 12/11/2010 08:39:01 | 27.197 |
| 12/13/2010 02:24:01 | 24.064 | 12/11/2010 08:59:01 | 27.197 |
| 12/13/2010 02:44:01 | 24.252 | 12/11/2010 09:19:01 | 27.197 |
| 12/13/2010 03:04:01 | 24.314 | 12/11/2010 09:39:01 | 27.197 |
| 12/13/2010 03:24:01 | 24.377 | 12/11/2010 09:59:01 | 27.134 |
| 12/13/2010 03:44:01 | 24.377 | 12/11/2010 10:19:01 | 27.134 |
| 12/13/2010 04:04:01 | 24.252 | 12/11/2010 10:39:01 | 27.134 |
| 12/13/2010 04:24:01 | 24.002 | 12/11/2010 10:59:01 | 27.134 |
| 12/13/2010 04:44:01 | 23.689 | 12/11/2010 11:19:01 | 27.134 |
| 12/13/2010 05:04:01 | 23.501 | 12/11/2010 11:39:01 | 27.134 |
| 12/13/2010 05:24:01 | 23.501 | 12/11/2010 11:59:01 | 27.134 |
| 12/13/2010 05:44:01 | 23.627 | 12/11/2010 12:19:01 | 27.134 |
| 12/13/2010 06:04:01 | 24.127 | 12/11/2010 12:39:01 | 27.134 |
| 12/13/2010 06:24:01 | 24.814 | 12/11/2010 12:59:01 | 27.134 |
| 12/13/2010 06:44:01 | 25.939 | 12/11/2010 13:19:01 | 27.134 |
| 12/13/2010 07:04:01 | 26.627 | 12/11/2010 13:39:01 | 27.134 |
| 12/13/2010 07:24:01 | 27.376 | 12/11/2010 13:59:01 | 27.134 |
| 12/13/2010 07:44:01 | 28.063 | 12/11/2010 14:19:01 | 27.134 |
| 12/13/2010 08:04:01 | 29.312 | 12/11/2010 14:39:01 | 27.134 |
| 12/13/2010 08:24:01 | 30.186 | 12/11/2010 14:59:01 | 27.197 |
| 12/13/2010 08:44:01 | 30.810 | 12/11/2010 15:19:01 | 27.197 |
| 12/13/2010 09:04:01 | 31.870 | 12/11/2010 15:39:01 | 27.197 |
| 12/13/2010 09:24:01 | 33.305 | 12/11/2010 15:59:01 | 27.197 |
| 12/13/2010 09:44:01 | 34.240 | 12/11/2010 16:19:01 | 27.197 |
| 12/13/2010 10:04:01 | 33.803 | 12/11/2010 16:39:01 | 27.197 |
| 12/13/2010 10:24:01 | 33.803 | 12/11/2010 16:59:01 | 27.197 |
| 12/13/2010 10:44:01 | 34.863 | 12/11/2010 17:19:01 | 27.197 |
| 12/13/2010 11:04:01 | 35.050 | 12/11/2010 17:39:01 | 27.259 |
| 12/13/2010 11:24:01 | 33.990 | 12/11/2010 17:59:01 | 27.259 |
| 12/13/2010 11:44:01 | 33.616 | 12/11/2010 18:19:01 | 27.259 |
| 12/13/2010 12:04:01 | 33.928 | 12/11/2010 18:39:01 | 27.259 |
| 12/13/2010 12:24:01 | 33.928 | 12/11/2010 18:59:01 | 27.259 |
| 12/13/2010 12:44:01 | 34.551 | 12/11/2010 19:19:01 | 27.259 |
| 12/13/2010 13:04:01 | 35.798 | 12/11/2010 19:39:01 | 27.259 |
| 12/13/2010 13:24:01 | 37.541 | 12/11/2010 19:59:01 | 27.259 |
| 12/13/2010 13:44:01 | 38.787 | 12/11/2010 20:19:01 | 27.259 |
| 12/13/2010 14:04:01 | 36.358 | 12/11/2010 20:39:01 | 27.259 |
| 12/13/2010 14:24:01 | 36.421 | 12/11/2010 20:59:01 | 27.259 |
| 12/13/2010 14:44:01 | 34.801 | 12/11/2010 21:19:01 | 27.259 |
| 12/13/2010 15:04:01 | 35.175 | 12/11/2010 21:39:01 | 27.259 |
| 12/13/2010 15:24:01 | 35.611 | 12/11/2010 21:59:01 | 27.259 |
| 12/13/2010 15:44:01 | 35.611 | 12/11/2010 22:19:01 | 27.259 |
| 12/13/2010 16:04:01 | 35.486 | 12/11/2010 22:39:01 | 27.259 |

|                     |        |                     |        |
|---------------------|--------|---------------------|--------|
| 12/13/2010 16:24:01 | 34.863 | 12/11/2010 22:59:01 | 27.259 |
| 12/13/2010 16:44:01 | 33.866 | 12/11/2010 23:19:01 | 27.259 |
| 12/13/2010 17:04:01 | 33.180 | 12/11/2010 23:39:01 | 27.259 |
| 12/13/2010 17:24:01 | 32.556 | 12/11/2010 23:59:01 | 27.259 |
| 12/13/2010 17:44:01 | 31.808 | 12/12/2010 00:19:01 | 27.259 |
| 12/13/2010 18:04:01 | 31.247 | 12/12/2010 00:39:01 | 27.259 |
| 12/13/2010 18:24:01 | 30.435 | 12/12/2010 00:59:01 | 27.197 |
| 12/13/2010 18:44:01 | 29.624 | 12/12/2010 01:19:01 | 27.197 |
| 12/13/2010 19:04:01 | 29.000 | 12/12/2010 01:39:01 | 27.197 |
| 12/13/2010 19:24:01 | 28.500 | 12/12/2010 01:59:01 | 27.197 |
| 12/13/2010 19:44:01 | 28.063 | 12/12/2010 02:19:01 | 27.197 |
| 12/13/2010 20:04:01 | 27.689 | 12/12/2010 02:39:01 | 27.134 |
| 12/13/2010 20:24:01 | 27.376 | 12/12/2010 02:59:01 | 27.134 |
| 12/13/2010 20:44:01 | 27.189 | 12/12/2010 03:19:01 | 27.134 |
| 12/13/2010 21:04:01 | 26.877 | 12/12/2010 03:39:01 | 27.134 |
| 12/13/2010 21:24:01 | 26.502 | 12/12/2010 03:59:01 | 27.134 |
| 12/13/2010 21:44:01 | 26.314 | 12/12/2010 04:19:01 | 27.072 |
| 12/13/2010 22:04:01 | 25.939 | 12/12/2010 04:39:01 | 27.072 |
| 12/13/2010 22:24:01 | 25.689 | 12/12/2010 04:59:01 | 27.072 |
| 12/13/2010 22:44:01 | 25.564 | 12/12/2010 05:19:01 | 27.072 |
| 12/13/2010 23:04:01 | 25.439 | 12/12/2010 05:39:01 | 27.072 |
| 12/13/2010 23:24:01 | 25.439 | 12/12/2010 05:59:01 | 27.072 |
| 12/13/2010 23:44:01 | 25.252 | 12/12/2010 06:19:01 | 27.009 |
| 12/14/2010 00:04:01 | 25.377 | 12/12/2010 06:39:01 | 27.009 |
| 12/14/2010 00:24:01 | 25.752 | 12/12/2010 06:59:01 | 27.009 |
| 12/14/2010 00:44:01 | 25.689 | 12/12/2010 07:19:01 | 27.009 |
| 12/14/2010 01:04:01 | 25.377 | 12/12/2010 07:39:01 | 27.009 |
| 12/14/2010 01:24:01 | 25.127 | 12/12/2010 07:59:01 | 27.009 |
| 12/14/2010 01:44:01 | 25.002 | 12/12/2010 08:19:01 | 26.947 |
| 12/14/2010 02:04:01 | 25.127 | 12/12/2010 08:39:01 | 26.947 |
| 12/14/2010 02:24:01 | 25.127 | 12/12/2010 08:59:01 | 26.947 |
| 12/14/2010 02:44:01 | 25.189 | 12/12/2010 09:19:01 | 26.947 |
| 12/14/2010 03:04:01 | 25.252 | 12/12/2010 09:39:01 | 26.947 |
| 12/14/2010 03:24:01 | 25.252 | 12/12/2010 09:59:01 | 26.947 |
| 12/14/2010 03:44:01 | 25.252 | 12/12/2010 10:19:01 | 26.947 |
| 12/14/2010 04:04:01 | 25.064 | 12/12/2010 10:39:01 | 26.947 |
| 12/14/2010 04:24:01 | 25.002 | 12/12/2010 10:59:01 | 26.947 |
| 12/14/2010 04:44:01 | 24.939 | 12/12/2010 11:19:01 | 26.947 |
| 12/14/2010 05:04:01 | 24.752 | 12/12/2010 11:39:01 | 26.947 |
| 12/14/2010 05:24:01 | 24.627 | 12/12/2010 11:59:01 | 26.947 |
| 12/14/2010 05:44:01 | 24.752 | 12/12/2010 12:19:01 | 26.947 |
| 12/14/2010 06:04:01 | 25.252 | 12/12/2010 12:39:01 | 26.947 |
| 12/14/2010 06:24:01 | 25.877 | 12/12/2010 12:59:01 | 27.009 |
| 12/14/2010 06:44:01 | 26.564 | 12/12/2010 13:19:01 | 27.009 |
| 12/14/2010 07:04:01 | 27.064 | 12/12/2010 13:39:01 | 27.009 |
| 12/14/2010 07:24:01 | 27.751 | 12/12/2010 13:59:01 | 27.072 |
| 12/14/2010 07:44:01 | 28.688 | 12/12/2010 14:19:01 | 27.072 |
| 12/14/2010 08:04:01 | 29.187 | 12/12/2010 14:39:01 | 27.072 |
| 12/14/2010 08:24:01 | 29.499 | 12/12/2010 14:59:01 | 27.072 |
| 12/14/2010 08:44:01 | 29.687 | 12/12/2010 15:19:01 | 27.134 |

|                     |        |                     |        |
|---------------------|--------|---------------------|--------|
| 12/14/2010 09:04:01 | 29.999 | 12/12/2010 15:39:01 | 27.134 |
| 12/14/2010 09:24:01 | 30.061 | 12/12/2010 15:59:01 | 27.197 |
| 12/14/2010 09:44:01 | 30.435 | 12/12/2010 16:19:01 | 27.197 |
| 12/14/2010 10:04:01 | 33.616 | 12/12/2010 16:39:01 | 27.259 |
| 12/14/2010 10:24:01 | 33.492 | 12/12/2010 16:59:01 | 27.259 |
| 12/14/2010 10:44:01 | 35.673 | 12/12/2010 17:19:01 | 27.321 |
| 12/14/2010 11:04:01 | 36.856 | 12/12/2010 17:39:01 | 27.321 |
| 12/14/2010 11:24:01 | 34.240 | 12/12/2010 17:59:01 | 27.321 |
| 12/14/2010 11:44:01 | 35.299 | 12/12/2010 18:19:01 | 27.384 |
| 12/14/2010 12:04:01 | 35.860 | 12/12/2010 18:39:01 | 27.384 |
| 12/14/2010 12:24:01 | 38.600 | 12/12/2010 18:59:01 | 27.384 |
| 12/14/2010 12:44:01 | 37.479 | 12/12/2010 19:19:01 | 27.446 |
| 12/14/2010 13:04:01 | 37.106 | 12/12/2010 19:39:01 | 27.446 |
| 12/14/2010 13:24:01 | 37.666 | 12/12/2010 19:59:01 | 27.446 |
| 12/14/2010 13:44:01 | 39.284 | 12/12/2010 20:19:01 | 27.446 |
| 12/14/2010 14:04:01 | 39.596 | 12/12/2010 20:39:01 | 27.509 |
| 12/14/2010 14:24:01 | 39.845 | 12/12/2010 20:59:01 | 27.509 |
| 12/14/2010 14:44:01 | 36.421 | 12/12/2010 21:19:01 | 27.509 |
| 12/14/2010 15:04:01 | 35.112 | 12/12/2010 21:39:01 | 27.509 |
| 12/14/2010 15:24:01 | 34.676 | 12/12/2010 21:59:01 | 27.509 |
| 12/14/2010 15:44:01 | 35.798 | 12/12/2010 22:19:01 | 27.509 |
| 12/14/2010 16:04:01 | 34.925 | 12/12/2010 22:39:01 | 27.509 |
| 12/14/2010 16:24:01 | 34.302 | 12/12/2010 22:59:01 | 27.509 |
| 12/14/2010 16:44:01 | 32.681 | 12/12/2010 23:19:01 | 27.509 |
| 12/14/2010 17:04:01 | 31.122 | 12/12/2010 23:39:01 | 27.509 |
| 12/14/2010 17:24:01 | 30.435 | 12/12/2010 23:59:01 | 27.509 |
| 12/14/2010 17:44:01 | 29.874 | 12/13/2010 00:19:01 | 27.509 |
| 12/14/2010 18:04:01 | 29.499 | 12/13/2010 00:39:01 | 27.509 |
| 12/14/2010 18:24:01 | 29.125 | 12/13/2010 00:59:01 | 27.509 |
| 12/14/2010 18:44:01 | 28.875 | 12/13/2010 01:19:01 | 27.509 |
| 12/14/2010 19:04:01 | 28.625 | 12/13/2010 01:39:01 | 27.509 |
| 12/14/2010 19:24:01 | 28.376 | 12/13/2010 01:59:01 | 27.509 |
| 12/14/2010 19:44:01 | 28.001 | 12/13/2010 02:19:01 | 27.446 |
| 12/14/2010 20:04:01 | 27.626 | 12/13/2010 02:39:01 | 27.446 |
| 12/14/2010 20:24:01 | 27.126 | 12/13/2010 02:59:01 | 27.446 |
| 12/14/2010 20:44:01 | 26.939 | 12/13/2010 03:19:01 | 27.446 |
| 12/14/2010 21:04:01 | 26.627 | 12/13/2010 03:39:01 | 27.446 |
| 12/14/2010 21:24:01 | 26.189 | 12/13/2010 03:59:01 | 27.446 |
| 12/14/2010 21:44:01 | 25.627 | 12/13/2010 04:19:01 | 27.384 |
| 12/14/2010 22:04:01 | 25.314 | 12/13/2010 04:39:01 | 27.384 |
| 12/14/2010 22:24:01 | 25.064 | 12/13/2010 04:59:01 | 27.384 |
| 12/14/2010 22:44:01 | 24.752 | 12/13/2010 05:19:01 | 27.384 |
| 12/14/2010 23:04:01 | 24.814 | 12/13/2010 05:39:01 | 27.384 |
| 12/14/2010 23:24:01 | 24.939 | 12/13/2010 05:59:01 | 27.321 |
| 12/14/2010 23:44:01 | 24.689 | 12/13/2010 06:19:01 | 27.321 |
| 12/15/2010 00:04:01 | 24.439 | 12/13/2010 06:39:01 | 27.321 |
| 12/15/2010 00:24:01 | 24.189 | 12/13/2010 06:59:01 | 27.321 |
| 12/15/2010 00:44:01 | 24.127 | 12/13/2010 07:19:01 | 27.321 |
| 12/15/2010 01:04:01 | 23.939 | 12/13/2010 07:39:01 | 27.321 |
| 12/15/2010 01:24:01 | 23.689 | 12/13/2010 07:59:01 | 27.259 |

|                     |        |                     |        |
|---------------------|--------|---------------------|--------|
| 12/15/2010 01:44:01 | 23.564 | 12/13/2010 08:19:01 | 27.259 |
| 12/15/2010 02:04:01 | 23.501 | 12/13/2010 08:39:01 | 27.259 |
| 12/15/2010 02:24:01 | 23.501 | 12/13/2010 08:59:01 | 27.259 |
| 12/15/2010 02:44:01 | 23.501 | 12/13/2010 09:19:01 | 27.259 |
| 12/15/2010 03:04:01 | 23.376 | 12/13/2010 09:39:01 | 27.259 |
| 12/15/2010 03:24:01 | 23.251 | 12/13/2010 09:59:01 | 27.197 |
| 12/15/2010 03:44:01 | 23.064 | 12/13/2010 10:19:01 | 27.197 |
| 12/15/2010 04:04:01 | 22.939 | 12/13/2010 10:39:01 | 27.197 |
| 12/15/2010 04:24:01 | 22.688 | 12/13/2010 10:59:01 | 27.197 |
| 12/15/2010 04:44:01 | 22.563 | 12/13/2010 11:19:01 | 27.197 |
| 12/15/2010 05:04:01 | 22.438 | 12/13/2010 11:39:01 | 27.197 |
| 12/15/2010 05:24:01 | 22.313 | 12/13/2010 11:59:01 | 27.197 |
| 12/15/2010 05:44:01 | 22.438 | 12/13/2010 12:19:01 | 27.259 |
| 12/15/2010 06:04:01 | 22.751 | 12/13/2010 12:39:01 | 27.259 |
| 12/15/2010 06:24:01 | 23.439 | 12/13/2010 12:59:01 | 27.259 |
| 12/15/2010 06:44:01 | 24.564 | 12/13/2010 13:19:01 | 27.259 |
| 12/15/2010 07:04:01 | 26.127 | 12/13/2010 13:39:01 | 27.259 |
| 12/15/2010 07:24:01 | 27.689 | 12/13/2010 13:59:01 | 27.259 |
| 12/15/2010 07:44:01 | 28.813 | 12/13/2010 14:19:01 | 27.321 |
| 12/15/2010 08:04:01 | 30.248 | 12/13/2010 14:39:01 | 27.321 |
| 12/15/2010 08:24:01 | 31.122 | 12/13/2010 14:59:01 | 27.321 |
| 12/15/2010 08:44:01 | 32.057 | 12/13/2010 15:19:01 | 27.321 |
| 12/15/2010 09:04:01 | 32.494 | 12/13/2010 15:39:01 | 27.384 |
| 12/15/2010 09:24:01 | 33.679 | 12/13/2010 15:59:01 | 27.384 |
| 12/15/2010 09:44:01 | 32.806 | 12/13/2010 16:19:01 | 27.384 |
| 12/15/2010 10:04:01 | 34.177 | 12/13/2010 16:39:01 | 27.384 |
| 12/15/2010 10:24:01 | 34.053 | 12/13/2010 16:59:01 | 27.446 |
| 12/15/2010 10:44:01 | 34.427 | 12/13/2010 17:19:01 | 27.446 |
| 12/15/2010 11:04:01 | 35.611 | 12/13/2010 17:39:01 | 27.446 |
| 12/15/2010 11:24:01 | 36.670 | 12/13/2010 17:59:01 | 27.509 |
| 12/15/2010 11:44:01 | 37.604 | 12/13/2010 18:19:01 | 27.509 |
| 12/15/2010 12:04:01 | 37.915 | 12/13/2010 18:39:01 | 27.509 |
| 12/15/2010 12:24:01 | 39.284 | 12/13/2010 18:59:01 | 27.509 |
| 12/15/2010 12:44:01 | 38.351 | 12/13/2010 19:19:01 | 27.571 |
| 12/15/2010 13:04:01 | 38.787 | 12/13/2010 19:39:01 | 27.571 |
| 12/15/2010 13:24:01 | 38.724 | 12/13/2010 19:59:01 | 27.571 |
| 12/15/2010 13:44:01 | 39.533 | 12/13/2010 20:19:01 | 27.571 |
| 12/15/2010 14:04:01 | 40.778 | 12/13/2010 20:39:01 | 27.571 |
| 12/15/2010 14:24:01 | 39.409 | 12/13/2010 20:59:01 | 27.571 |
| 12/15/2010 14:44:01 | 35.050 | 12/13/2010 21:19:01 | 27.571 |
| 12/15/2010 15:04:01 | 30.872 | 12/13/2010 21:39:01 | 27.634 |
| 12/15/2010 15:24:01 | 29.687 | 12/13/2010 21:59:01 | 27.634 |
| 12/15/2010 15:44:01 | 31.808 | 12/13/2010 22:19:01 | 27.634 |
| 12/15/2010 16:04:01 | 31.933 | 12/13/2010 22:39:01 | 27.634 |
| 12/15/2010 16:24:01 | 30.373 | 12/13/2010 22:59:01 | 27.634 |
| 12/15/2010 16:44:01 | 30.623 | 12/13/2010 23:19:01 | 27.634 |
| 12/15/2010 17:04:01 | 29.811 | 12/13/2010 23:39:01 | 27.634 |
| 12/15/2010 17:24:01 | 29.499 | 12/13/2010 23:59:01 | 27.634 |
| 12/15/2010 17:44:01 | 29.624 | 12/14/2010 00:19:01 | 27.634 |
| 12/15/2010 18:04:01 | 29.250 | 12/14/2010 00:39:01 | 27.634 |



|                     |        |                     |        |
|---------------------|--------|---------------------|--------|
| 12/15/2010 18:24:01 | 26.439 | 12/14/2010 00:59:01 | 27.571 |
| 12/15/2010 18:44:01 | 24.939 | 12/14/2010 01:19:01 | 27.571 |
| 12/15/2010 19:04:01 | 24.502 | 12/14/2010 01:39:01 | 27.571 |
| 12/15/2010 19:24:01 | 24.314 | 12/14/2010 01:59:01 | 27.571 |
| 12/15/2010 19:44:01 | 24.377 | 12/14/2010 02:19:01 | 27.571 |
| 12/15/2010 20:04:01 | 24.314 | 12/14/2010 02:39:01 | 27.571 |
| 12/15/2010 20:24:01 | 24.189 | 12/14/2010 02:59:01 | 27.571 |
| 12/15/2010 20:44:01 | 24.064 | 12/14/2010 03:19:01 | 27.571 |
| 12/15/2010 21:04:01 | 24.002 | 12/14/2010 03:39:01 | 27.571 |
| 12/15/2010 21:24:01 | 24.127 | 12/14/2010 03:59:01 | 27.509 |
| 12/15/2010 21:44:01 | 24.314 | 12/14/2010 04:19:01 | 27.509 |
| 12/15/2010 22:04:01 | 24.314 | 12/14/2010 04:39:01 | 27.509 |
| 12/15/2010 22:24:01 | 24.127 | 12/14/2010 04:59:01 | 27.509 |
| 12/15/2010 22:44:01 | 24.127 | 12/14/2010 05:19:01 | 27.509 |
| 12/15/2010 23:04:01 | 24.064 | 12/14/2010 05:39:01 | 27.509 |
| 12/15/2010 23:24:01 | 23.939 | 12/14/2010 05:59:01 | 27.509 |
| 12/15/2010 23:44:01 | 23.814 | 12/14/2010 06:19:01 | 27.509 |
| 12/16/2010 00:04:01 | 23.627 | 12/14/2010 06:39:01 | 27.446 |
| 12/16/2010 00:24:01 | 23.564 | 12/14/2010 06:59:01 | 27.446 |
| 12/16/2010 00:44:01 | 23.251 | 12/14/2010 07:19:01 | 27.446 |
| 12/16/2010 01:04:01 | 23.126 | 12/14/2010 07:39:01 | 27.446 |
| 12/16/2010 01:24:01 | 23.126 | 12/14/2010 07:59:01 | 27.446 |
| 12/16/2010 01:44:01 | 23.189 | 12/14/2010 08:19:01 | 27.446 |
| 12/16/2010 02:04:01 | 23.189 | 12/14/2010 08:39:01 | 27.446 |
| 12/16/2010 02:24:01 | 23.064 | 12/14/2010 08:59:01 | 27.446 |
| 12/16/2010 02:44:01 | 23.126 | 12/14/2010 09:19:01 | 27.384 |
| 12/16/2010 03:04:01 | 23.376 | 12/14/2010 09:39:01 | 27.384 |
| 12/16/2010 03:24:01 | 23.439 | 12/14/2010 09:59:01 | 27.384 |
| 12/16/2010 03:44:01 | 23.189 | 12/14/2010 10:19:01 | 27.384 |
| 12/16/2010 04:04:01 | 23.064 | 12/14/2010 10:39:01 | 27.384 |
| 12/16/2010 04:24:01 | 22.876 | 12/14/2010 10:59:01 | 27.384 |
| 12/16/2010 04:44:01 | 22.876 | 12/14/2010 11:19:01 | 27.384 |
| 12/16/2010 05:04:01 | 23.064 | 12/14/2010 11:39:01 | 27.384 |
| 12/16/2010 05:24:01 | 23.126 | 12/14/2010 11:59:01 | 27.384 |
| 12/16/2010 05:44:01 | 23.376 | 12/14/2010 12:19:01 | 27.384 |
| 12/16/2010 06:04:01 | 23.439 | 12/14/2010 12:39:01 | 27.446 |
| 12/16/2010 06:24:01 | 24.127 | 12/14/2010 12:59:01 | 27.446 |
| 12/16/2010 06:44:01 | 25.064 | 12/14/2010 13:19:01 | 27.446 |
| 12/16/2010 07:04:01 | 26.189 | 12/14/2010 13:39:01 | 27.446 |
| 12/16/2010 07:24:01 | 27.439 | 12/14/2010 13:59:01 | 27.446 |
| 12/16/2010 07:44:01 | 28.750 | 12/14/2010 14:19:01 | 27.509 |
| 12/16/2010 08:04:01 | 28.625 | 12/14/2010 14:39:01 | 27.509 |
| 12/16/2010 08:24:01 | 28.937 | 12/14/2010 14:59:01 | 27.509 |
| 12/16/2010 08:44:01 | 30.311 | 12/14/2010 15:19:01 | 27.571 |
| 12/16/2010 09:04:01 | 30.810 | 12/14/2010 15:39:01 | 27.571 |
| 12/16/2010 09:24:01 | 32.556 | 12/14/2010 15:59:01 | 27.571 |
| 12/16/2010 09:44:01 | 33.118 | 12/14/2010 16:19:01 | 27.634 |
| 12/16/2010 10:04:01 | 31.746 | 12/14/2010 16:39:01 | 27.634 |
| 12/16/2010 10:24:01 | 33.118 | 12/14/2010 16:59:01 | 27.696 |
| 12/16/2010 10:44:01 | 34.115 | 12/14/2010 17:19:01 | 27.696 |

|                     |        |                     |        |
|---------------------|--------|---------------------|--------|
| 12/16/2010 11:04:01 | 35.611 | 12/14/2010 17:39:01 | 27.696 |
| 12/16/2010 11:24:01 | 36.545 | 12/14/2010 17:59:01 | 27.759 |
| 12/16/2010 11:44:01 | 36.171 | 12/14/2010 18:19:01 | 27.759 |
| 12/16/2010 12:04:01 | 36.670 | 12/14/2010 18:39:01 | 27.759 |
| 12/16/2010 12:24:01 | 36.919 | 12/14/2010 18:59:01 | 27.821 |
| 12/16/2010 12:44:01 | 36.483 | 12/14/2010 19:19:01 | 27.821 |
| 12/16/2010 13:04:01 | 37.355 | 12/14/2010 19:39:01 | 27.821 |
| 12/16/2010 13:24:01 | 38.787 | 12/14/2010 19:59:01 | 27.821 |
| 12/16/2010 13:44:01 | 39.782 | 12/14/2010 20:19:01 | 27.821 |
| 12/16/2010 14:04:01 | 38.102 | 12/14/2010 20:39:01 | 27.883 |
| 12/16/2010 14:24:01 | 36.421 | 12/14/2010 20:59:01 | 27.883 |
| 12/16/2010 14:44:01 | 30.935 | 12/14/2010 21:19:01 | 27.883 |
| 12/16/2010 15:04:01 | 28.376 | 12/14/2010 21:39:01 | 27.883 |
| 12/16/2010 15:24:01 | 27.251 | 12/14/2010 21:59:01 | 27.883 |
| 12/16/2010 15:44:01 | 26.502 | 12/14/2010 22:19:01 | 27.883 |
| 12/16/2010 16:04:01 | 26.127 | 12/14/2010 22:39:01 | 27.883 |
| 12/16/2010 16:24:01 | 26.189 | 12/14/2010 22:59:01 | 27.883 |
| 12/16/2010 16:44:01 | 26.314 | 12/14/2010 23:19:01 | 27.883 |
| 12/16/2010 17:04:01 | 26.189 | 12/14/2010 23:39:01 | 27.883 |
| 12/16/2010 17:24:01 | 25.877 | 12/14/2010 23:59:01 | 27.883 |
| 12/16/2010 17:44:01 | 25.939 | 12/15/2010 00:19:01 | 27.883 |
| 12/16/2010 18:04:01 | 25.814 | 12/15/2010 00:39:01 | 27.821 |
| 12/16/2010 18:24:01 | 25.752 | 12/15/2010 00:59:01 | 27.821 |
| 12/16/2010 18:44:01 | 25.439 | 12/15/2010 01:19:01 | 27.821 |
| 12/16/2010 19:04:01 | 25.189 | 12/15/2010 01:39:01 | 27.821 |
| 12/16/2010 19:24:01 | 24.939 | 12/15/2010 01:59:01 | 27.821 |
| 12/16/2010 19:44:01 | 24.752 | 12/15/2010 02:19:01 | 27.821 |
| 12/16/2010 20:04:01 | 24.377 | 12/15/2010 02:39:01 | 27.759 |
| 12/16/2010 20:24:01 | 23.877 | 12/15/2010 02:59:01 | 27.759 |
| 12/16/2010 20:44:01 | 23.627 | 12/15/2010 03:19:01 | 27.759 |
| 12/16/2010 21:04:01 | 23.627 | 12/15/2010 03:39:01 | 27.759 |
| 12/16/2010 21:24:01 | 23.439 | 12/15/2010 03:59:01 | 27.759 |
| 12/16/2010 21:44:01 | 23.501 | 12/15/2010 04:19:01 | 27.759 |
| 12/16/2010 22:04:01 | 23.689 | 12/15/2010 04:39:01 | 27.696 |
| 12/16/2010 22:24:01 | 23.564 | 12/15/2010 04:59:01 | 27.696 |
| 12/16/2010 22:44:01 | 23.439 | 12/15/2010 05:19:01 | 27.696 |
| 12/16/2010 23:04:01 | 23.314 | 12/15/2010 05:39:01 | 27.696 |
| 12/16/2010 23:24:01 | 23.251 | 12/15/2010 05:59:01 | 27.634 |
| 12/16/2010 23:44:01 | 23.189 | 12/15/2010 06:19:01 | 27.634 |
| 12/17/2010 00:04:01 | 23.001 | 12/15/2010 06:39:01 | 27.634 |
| 12/17/2010 00:24:01 | 22.876 | 12/15/2010 06:59:01 | 27.634 |
| 12/17/2010 00:44:01 | 22.751 | 12/15/2010 07:19:01 | 27.571 |
| 12/17/2010 01:04:01 | 22.876 | 12/15/2010 07:39:01 | 27.571 |
| 12/17/2010 01:24:01 | 23.001 | 12/15/2010 07:59:01 | 27.571 |
| 12/17/2010 01:44:01 | 23.126 | 12/15/2010 08:19:01 | 27.571 |
| 12/17/2010 02:04:01 | 23.251 | 12/15/2010 08:39:01 | 27.509 |
| 12/17/2010 02:24:01 | 23.251 | 12/15/2010 08:59:01 | 27.509 |
| 12/17/2010 02:44:01 | 23.314 | 12/15/2010 09:19:01 | 27.509 |
| 12/17/2010 03:04:01 | 23.439 | 12/15/2010 09:39:01 | 27.509 |
| 12/17/2010 03:24:01 | 23.501 | 12/15/2010 09:59:01 | 27.509 |

|                     |        |                     |        |
|---------------------|--------|---------------------|--------|
| 12/17/2010 03:44:01 | 23.501 | 12/15/2010 10:19:01 | 27.446 |
| 12/17/2010 04:04:01 | 23.376 | 12/15/2010 10:39:01 | 27.446 |
| 12/17/2010 04:24:01 | 23.376 | 12/15/2010 10:59:01 | 27.446 |
| 12/17/2010 04:44:01 | 23.439 | 12/15/2010 11:19:01 | 27.446 |
| 12/17/2010 05:04:01 | 23.501 | 12/15/2010 11:39:01 | 27.446 |
| 12/17/2010 05:24:01 | 23.689 | 12/15/2010 11:59:01 | 27.446 |
| 12/17/2010 05:44:01 | 23.939 | 12/15/2010 12:19:01 | 27.446 |
| 12/17/2010 06:04:01 | 24.252 | 12/15/2010 12:39:01 | 27.446 |
| 12/17/2010 06:24:01 | 24.627 | 12/15/2010 12:59:01 | 27.446 |
| 12/17/2010 06:44:01 | 25.314 | 12/15/2010 13:19:01 | 27.509 |
| 12/17/2010 07:04:01 | 26.002 | 12/15/2010 13:39:01 | 27.509 |
| 12/17/2010 07:24:01 | 27.002 | 12/15/2010 13:59:01 | 27.509 |
| 12/17/2010 07:44:01 | 28.063 | 12/15/2010 14:19:01 | 27.571 |
| 12/17/2010 08:04:01 | 28.438 | 12/15/2010 14:39:01 | 27.571 |
| 12/17/2010 08:24:01 | 28.937 | 12/15/2010 14:59:01 | 27.571 |
| 12/17/2010 08:44:01 | 29.687 | 12/15/2010 15:19:01 | 27.571 |
| 12/17/2010 09:04:01 | 30.935 | 12/15/2010 15:39:01 | 27.634 |
| 12/17/2010 09:24:01 | 29.936 | 12/15/2010 15:59:01 | 27.634 |
| 12/17/2010 09:44:01 | 33.305 | 12/15/2010 16:19:01 | 27.696 |
| 12/17/2010 10:04:01 | 34.302 | 12/15/2010 16:39:01 | 27.696 |
| 12/17/2010 10:24:01 | 34.863 | 12/15/2010 16:59:01 | 27.759 |
| 12/17/2010 10:44:01 | 34.302 | 12/15/2010 17:19:01 | 27.759 |
| 12/17/2010 11:04:01 | 34.863 | 12/15/2010 17:39:01 | 27.759 |
| 12/17/2010 11:24:01 | 36.296 | 12/15/2010 17:59:01 | 27.821 |
| 12/17/2010 11:44:01 | 36.171 | 12/15/2010 18:19:01 | 27.821 |
| 12/17/2010 12:04:01 | 33.803 | 12/15/2010 18:39:01 | 27.821 |
| 12/17/2010 12:24:01 | 32.245 | 12/15/2010 18:59:01 | 27.821 |
| 12/17/2010 12:44:01 | 30.872 | 12/15/2010 19:19:01 | 27.883 |
| 12/17/2010 13:04:01 | 30.311 | 12/15/2010 19:39:01 | 27.883 |
| 12/17/2010 13:24:01 | 32.307 | 12/15/2010 19:59:01 | 27.883 |
| 12/17/2010 13:44:01 | 34.302 | 12/15/2010 20:19:01 | 27.883 |
| 12/17/2010 14:04:01 | 35.735 | 12/15/2010 20:39:01 | 27.883 |
| 12/17/2010 14:24:01 | 36.109 | 12/15/2010 20:59:01 | 27.883 |
| 12/17/2010 14:44:01 | 36.109 | 12/15/2010 21:19:01 | 27.883 |
| 12/17/2010 15:04:01 | 34.738 | 12/15/2010 21:39:01 | 27.883 |
| 12/17/2010 15:24:01 | 33.180 | 12/15/2010 21:59:01 | 27.883 |
| 12/17/2010 15:44:01 | 32.993 | 12/15/2010 22:19:01 | 27.883 |
| 12/17/2010 16:04:01 | 32.743 | 12/15/2010 22:39:01 | 27.883 |
| 12/17/2010 16:24:01 | 31.995 | 12/15/2010 22:59:01 | 27.883 |
| 12/17/2010 16:44:01 | 30.997 | 12/15/2010 23:19:01 | 27.883 |
| 12/17/2010 17:04:01 | 30.248 | 12/15/2010 23:39:01 | 27.883 |
| 12/17/2010 17:24:01 | 29.312 | 12/15/2010 23:59:01 | 27.883 |
| 12/17/2010 17:44:01 | 28.813 | 12/16/2010 00:19:01 | 27.821 |
| 12/17/2010 18:04:01 | 28.376 | 12/16/2010 00:39:01 | 27.821 |
| 12/17/2010 18:24:01 | 27.689 | 12/16/2010 00:59:01 | 27.821 |
| 12/17/2010 18:44:01 | 27.002 | 12/16/2010 01:19:01 | 27.821 |
| 12/17/2010 19:04:01 | 26.564 | 12/16/2010 01:39:01 | 27.821 |
| 12/17/2010 19:24:01 | 26.377 | 12/16/2010 01:59:01 | 27.821 |
| 12/17/2010 19:44:01 | 26.064 | 12/16/2010 02:19:01 | 27.759 |
| 12/17/2010 20:04:01 | 25.752 | 12/16/2010 02:39:01 | 27.759 |

|                     |        |                     |        |
|---------------------|--------|---------------------|--------|
| 12/17/2010 20:24:01 | 25.502 | 12/16/2010 02:59:01 | 27.759 |
| 12/17/2010 20:44:01 | 25.439 | 12/16/2010 03:19:01 | 27.759 |
| 12/17/2010 21:04:01 | 25.314 | 12/16/2010 03:39:01 | 27.696 |
| 12/17/2010 21:24:01 | 25.127 | 12/16/2010 03:59:01 | 27.696 |
| 12/17/2010 21:44:01 | 25.189 | 12/16/2010 04:19:01 | 27.696 |
| 12/17/2010 22:04:01 | 25.252 | 12/16/2010 04:39:01 | 27.696 |
| 12/17/2010 22:24:01 | 25.064 | 12/16/2010 04:59:01 | 27.696 |
| 12/17/2010 22:44:01 | 24.814 | 12/16/2010 05:19:01 | 27.634 |
| 12/17/2010 23:04:01 | 24.689 | 12/16/2010 05:39:01 | 27.634 |
| 12/17/2010 23:24:01 | 24.689 | 12/16/2010 05:59:01 | 27.634 |
| 12/17/2010 23:44:01 | 24.814 | 12/16/2010 06:19:01 | 27.634 |
| 12/18/2010 00:04:01 | 25.002 | 12/16/2010 06:39:01 | 27.571 |
| 12/18/2010 00:24:01 | 25.002 | 12/16/2010 06:59:01 | 27.571 |
| 12/18/2010 00:44:01 | 24.939 | 12/16/2010 07:19:01 | 27.571 |
| 12/18/2010 01:04:01 | 25.002 | 12/16/2010 07:39:01 | 27.571 |
| 12/18/2010 01:24:01 | 24.127 | 12/16/2010 07:59:01 | 27.509 |
| 12/18/2010 01:44:01 | 23.627 | 12/16/2010 08:19:01 | 27.509 |
| 12/18/2010 02:04:01 | 23.376 | 12/16/2010 08:39:01 | 27.509 |
| 12/18/2010 02:24:01 | 23.376 | 12/16/2010 08:59:01 | 27.509 |
| 12/18/2010 02:44:01 | 23.439 | 12/16/2010 09:19:01 | 27.509 |
| 12/18/2010 03:04:01 | 23.376 | 12/16/2010 09:39:01 | 27.446 |
| 12/18/2010 03:24:01 | 23.439 | 12/16/2010 09:59:01 | 27.446 |
| 12/18/2010 03:44:01 | 23.439 | 12/16/2010 10:19:01 | 27.446 |
| 12/18/2010 04:04:01 | 23.376 | 12/16/2010 10:39:01 | 27.446 |
| 12/18/2010 04:24:01 | 23.314 | 12/16/2010 10:59:01 | 27.446 |
| 12/18/2010 04:44:01 | 23.439 | 12/16/2010 11:19:01 | 27.446 |
| 12/18/2010 05:04:01 | 23.439 | 12/16/2010 11:39:01 | 27.446 |
| 12/18/2010 05:24:01 | 23.439 | 12/16/2010 11:59:01 | 27.446 |
| 12/18/2010 05:44:01 | 23.501 | 12/16/2010 12:19:01 | 27.446 |
| 12/18/2010 06:04:01 | 23.752 | 12/16/2010 12:39:01 | 27.446 |
| 12/18/2010 06:24:01 | 23.877 | 12/16/2010 12:59:01 | 27.446 |
| 12/18/2010 06:44:01 | 24.252 | 12/16/2010 13:19:01 | 27.446 |
| 12/18/2010 07:04:01 | 24.502 | 12/16/2010 13:39:01 | 27.446 |
| 12/18/2010 07:24:01 | 24.689 | 12/16/2010 13:59:01 | 27.509 |
| 12/18/2010 07:44:01 | 25.127 | 12/16/2010 14:19:01 | 27.509 |
| 12/18/2010 08:04:01 | 25.314 | 12/16/2010 14:39:01 | 27.509 |
| 12/18/2010 08:24:01 | 27.126 | 12/16/2010 14:59:01 | 27.571 |
| 12/18/2010 08:44:01 | 27.751 | 12/16/2010 15:19:01 | 27.571 |
| 12/18/2010 09:04:01 | 28.251 | 12/16/2010 15:39:01 | 27.571 |
| 12/18/2010 09:24:01 | 29.187 | 12/16/2010 15:59:01 | 27.634 |
| 12/18/2010 09:44:01 | 31.746 | 12/16/2010 16:19:01 | 27.634 |
| 12/18/2010 10:04:01 | 32.307 | 12/16/2010 16:39:01 | 27.634 |
| 12/18/2010 10:24:01 | 32.120 | 12/16/2010 16:59:01 | 27.696 |
| 12/18/2010 10:44:01 | 33.118 | 12/16/2010 17:19:01 | 27.696 |
| 12/18/2010 11:04:01 | 33.990 | 12/16/2010 17:39:01 | 27.696 |
| 12/18/2010 11:24:01 | 34.676 | 12/16/2010 17:59:01 | 27.759 |
| 12/18/2010 11:44:01 | 34.115 | 12/16/2010 18:19:01 | 27.759 |
| 12/18/2010 12:04:01 | 33.554 | 12/16/2010 18:39:01 | 27.759 |
| 12/18/2010 12:24:01 | 35.175 | 12/16/2010 18:59:01 | 27.759 |
| 12/18/2010 12:44:01 | 34.801 | 12/16/2010 19:19:01 | 27.759 |

|                     |        |                     |        |
|---------------------|--------|---------------------|--------|
| 12/18/2010 13:04:01 | 34.115 | 12/16/2010 19:39:01 | 27.821 |
| 12/18/2010 13:24:01 | 33.367 | 12/16/2010 19:59:01 | 27.821 |
| 12/18/2010 13:44:01 | 33.990 | 12/16/2010 20:19:01 | 27.821 |
| 12/18/2010 14:04:01 | 36.171 | 12/16/2010 20:39:01 | 27.821 |
| 12/18/2010 14:24:01 | 36.234 | 12/16/2010 20:59:01 | 27.821 |
| 12/18/2010 14:44:01 | 34.489 | 12/16/2010 21:19:01 | 27.759 |
| 12/18/2010 15:04:01 | 33.866 | 12/16/2010 21:39:01 | 27.759 |
| 12/18/2010 15:24:01 | 32.619 | 12/16/2010 21:59:01 | 27.759 |
| 12/18/2010 15:44:01 | 32.619 | 12/16/2010 22:19:01 | 27.759 |
| 12/18/2010 16:04:01 | 31.995 | 12/16/2010 22:39:01 | 27.759 |
| 12/18/2010 16:24:01 | 31.746 | 12/16/2010 22:59:01 | 27.759 |
| 12/18/2010 16:44:01 | 31.496 | 12/16/2010 23:19:01 | 27.759 |
| 12/18/2010 17:04:01 | 31.434 | 12/16/2010 23:39:01 | 27.759 |
| 12/18/2010 17:24:01 | 28.063 | 12/16/2010 23:59:01 | 27.759 |
| 12/18/2010 17:44:01 | 25.502 | 12/17/2010 00:19:01 | 27.696 |
| 12/18/2010 18:04:01 | 25.064 | 12/17/2010 00:39:01 | 27.696 |
| 12/18/2010 18:24:01 | 25.189 | 12/17/2010 00:59:01 | 27.696 |
| 12/18/2010 18:44:01 | 25.252 | 12/17/2010 01:19:01 | 27.696 |
| 12/18/2010 19:04:01 | 25.252 | 12/17/2010 01:39:01 | 27.696 |
| 12/18/2010 19:24:01 | 25.189 | 12/17/2010 01:59:01 | 27.634 |
| 12/18/2010 19:44:01 | 25.127 | 12/17/2010 02:19:01 | 27.634 |
| 12/18/2010 20:04:01 | 25.002 | 12/17/2010 02:39:01 | 27.634 |
| 12/18/2010 20:24:01 | 24.939 | 12/17/2010 02:59:01 | 27.634 |
| 12/18/2010 20:44:01 | 24.939 | 12/17/2010 03:19:01 | 27.634 |
| 12/18/2010 21:04:01 | 24.939 | 12/17/2010 03:39:01 | 27.571 |
| 12/18/2010 21:24:01 | 24.877 | 12/17/2010 03:59:01 | 27.571 |
| 12/18/2010 21:44:01 | 24.689 | 12/17/2010 04:19:01 | 27.571 |
| 12/18/2010 22:04:01 | 24.689 | 12/17/2010 04:39:01 | 27.571 |
| 12/18/2010 22:24:01 | 24.689 | 12/17/2010 04:59:01 | 27.509 |
| 12/18/2010 22:44:01 | 24.627 | 12/17/2010 05:19:01 | 27.509 |
| 12/18/2010 23:04:01 | 24.627 | 12/17/2010 05:39:01 | 27.509 |
| 12/18/2010 23:24:01 | 24.377 | 12/17/2010 05:59:01 | 27.509 |
| 12/18/2010 23:44:01 | 24.189 | 12/17/2010 06:19:01 | 27.509 |
| 12/19/2010 00:04:01 | 24.189 | 12/17/2010 06:39:01 | 27.446 |
| 12/19/2010 00:24:01 | 24.314 | 12/17/2010 06:59:01 | 27.446 |
| 12/19/2010 00:44:01 | 24.502 | 12/17/2010 07:19:01 | 27.446 |
| 12/19/2010 01:04:01 | 24.627 | 12/17/2010 07:39:01 | 27.446 |
| 12/19/2010 01:24:01 | 24.752 | 12/17/2010 07:59:01 | 27.446 |
| 12/19/2010 01:44:01 | 24.814 | 12/17/2010 08:19:01 | 27.384 |
| 12/19/2010 02:04:01 | 24.939 | 12/17/2010 08:39:01 | 27.384 |
| 12/19/2010 02:24:01 | 24.814 | 12/17/2010 08:59:01 | 27.384 |
| 12/19/2010 02:44:01 | 24.877 | 12/17/2010 09:19:01 | 27.384 |
| 12/19/2010 03:04:01 | 24.314 | 12/17/2010 09:39:01 | 27.384 |
| 12/19/2010 03:24:01 | 23.627 | 12/17/2010 09:59:01 | 27.384 |
| 12/19/2010 03:44:01 | 22.876 | 12/17/2010 10:19:01 | 27.321 |
| 12/19/2010 04:04:01 | 22.501 | 12/17/2010 10:39:01 | 27.321 |
| 12/19/2010 04:24:01 | 22.376 | 12/17/2010 10:59:01 | 27.321 |
| 12/19/2010 04:44:01 | 22.376 | 12/17/2010 11:19:01 | 27.321 |
| 12/19/2010 05:04:01 | 22.563 | 12/17/2010 11:39:01 | 27.321 |
| 12/19/2010 05:24:01 | 22.626 | 12/17/2010 11:59:01 | 27.321 |

|                     |        |                     |        |
|---------------------|--------|---------------------|--------|
| 12/19/2010 05:44:01 | 22.814 | 12/17/2010 12:19:01 | 27.321 |
| 12/19/2010 06:04:01 | 22.814 | 12/17/2010 12:39:01 | 27.321 |
| 12/19/2010 06:24:01 | 23.126 | 12/17/2010 12:59:01 | 27.384 |
| 12/19/2010 06:44:01 | 23.126 | 12/17/2010 13:19:01 | 27.384 |
| 12/19/2010 07:04:01 | 23.439 | 12/17/2010 13:39:01 | 27.384 |
| 12/19/2010 07:24:01 | 24.189 | 12/17/2010 13:59:01 | 27.384 |
| 12/19/2010 07:44:01 | 24.252 | 12/17/2010 14:19:01 | 27.384 |
| 12/19/2010 08:04:01 | 24.627 | 12/17/2010 14:39:01 | 27.446 |
| 12/19/2010 08:24:01 | 24.564 | 12/17/2010 14:59:01 | 27.446 |
| 12/19/2010 08:44:01 | 25.064 | 12/17/2010 15:19:01 | 27.446 |
| 12/19/2010 09:04:01 | 25.564 | 12/17/2010 15:39:01 | 27.509 |
| 12/19/2010 09:24:01 | 26.377 | 12/17/2010 15:59:01 | 27.509 |
| 12/19/2010 09:44:01 | 26.814 | 12/17/2010 16:19:01 | 27.509 |
| 12/19/2010 10:04:01 | 26.814 | 12/17/2010 16:39:01 | 27.571 |
| 12/19/2010 10:24:01 | 26.314 | 12/17/2010 16:59:01 | 27.571 |
| 12/19/2010 10:44:01 | 27.376 | 12/17/2010 17:19:01 | 27.634 |
| 12/19/2010 11:04:01 | 29.000 | 12/17/2010 17:39:01 | 27.634 |
| 12/19/2010 11:24:01 | 28.813 | 12/17/2010 17:59:01 | 27.634 |
| 12/19/2010 11:44:01 | 28.750 | 12/17/2010 18:19:01 | 27.696 |
| 12/19/2010 12:04:01 | 28.438 | 12/17/2010 18:39:01 | 27.696 |
| 12/19/2010 12:24:01 | 29.687 | 12/17/2010 18:59:01 | 27.696 |
| 12/19/2010 12:44:01 | 31.371 | 12/17/2010 19:19:01 | 27.759 |
| 12/19/2010 13:04:01 | 31.247 | 12/17/2010 19:39:01 | 27.759 |
| 12/19/2010 13:24:01 | 29.312 | 12/17/2010 19:59:01 | 27.759 |
| 12/19/2010 13:44:01 | 28.063 | 12/17/2010 20:19:01 | 27.759 |
| 12/19/2010 14:04:01 | 27.439 | 12/17/2010 20:39:01 | 27.759 |
| 12/19/2010 14:24:01 | 27.126 | 12/17/2010 20:59:01 | 27.759 |
| 12/19/2010 14:44:01 | 27.064 | 12/17/2010 21:19:01 | 27.759 |
| 12/19/2010 15:04:01 | 27.751 | 12/17/2010 21:39:01 | 27.759 |
| 12/19/2010 15:24:01 | 28.376 | 12/17/2010 21:59:01 | 27.759 |
| 12/19/2010 15:44:01 | 29.562 | 12/17/2010 22:19:01 | 27.759 |
| 12/19/2010 16:04:01 | 28.188 | 12/17/2010 22:39:01 | 27.759 |
| 12/19/2010 16:24:01 | 27.501 | 12/17/2010 22:59:01 | 27.759 |
| 12/19/2010 16:44:01 | 27.251 | 12/17/2010 23:19:01 | 27.759 |
| 12/19/2010 17:04:01 | 27.064 | 12/17/2010 23:39:01 | 27.759 |
| 12/19/2010 17:24:01 | 26.814 | 12/17/2010 23:59:01 | 27.759 |
| 12/19/2010 17:44:01 | 26.439 | 12/18/2010 00:19:01 | 27.759 |
| 12/19/2010 18:04:01 | 26.127 | 12/18/2010 00:39:01 | 27.759 |
| 12/19/2010 18:24:01 | 25.877 | 12/18/2010 00:59:01 | 27.759 |
| 12/19/2010 18:44:01 | 25.752 | 12/18/2010 01:19:01 | 27.759 |
| 12/19/2010 19:04:01 | 25.627 | 12/18/2010 01:39:01 | 27.759 |
| 12/19/2010 19:24:01 | 25.564 | 12/18/2010 01:59:01 | 27.696 |
| 12/19/2010 19:44:01 | 25.439 | 12/18/2010 02:19:01 | 27.696 |
| 12/19/2010 20:04:01 | 25.314 | 12/18/2010 02:39:01 | 27.696 |
| 12/19/2010 20:24:01 | 25.127 | 12/18/2010 02:59:01 | 27.696 |
| 12/19/2010 20:44:01 | 24.814 | 12/18/2010 03:19:01 | 27.696 |
| 12/19/2010 21:04:01 | 24.564 | 12/18/2010 03:39:01 | 27.696 |
| 12/19/2010 21:24:01 | 24.439 | 12/18/2010 03:59:01 | 27.634 |
| 12/19/2010 21:44:01 | 24.314 | 12/18/2010 04:19:01 | 27.634 |
| 12/19/2010 22:04:01 | 24.127 | 12/18/2010 04:39:01 | 27.634 |

|                     |        |                     |        |
|---------------------|--------|---------------------|--------|
| 12/19/2010 22:24:01 | 24.064 | 12/18/2010 04:59:01 | 27.634 |
| 12/19/2010 22:44:01 | 24.002 | 12/18/2010 05:19:01 | 27.571 |
| 12/19/2010 23:04:01 | 23.939 | 12/18/2010 05:39:01 | 27.571 |
| 12/19/2010 23:24:01 | 23.877 | 12/18/2010 05:59:01 | 27.571 |
| 12/19/2010 23:44:01 | 23.877 | 12/18/2010 06:19:01 | 27.571 |
| 12/20/2010 00:04:01 | 23.814 | 12/18/2010 06:39:01 | 27.509 |
| 12/20/2010 00:24:01 | 23.814 | 12/18/2010 06:59:01 | 27.509 |
| 12/20/2010 00:44:01 | 23.752 | 12/18/2010 07:19:01 | 27.509 |
| 12/20/2010 01:04:01 | 23.877 | 12/18/2010 07:39:01 | 27.509 |
| 12/20/2010 01:24:01 | 23.877 | 12/18/2010 07:59:01 | 27.446 |
| 12/20/2010 01:44:01 | 23.939 | 12/18/2010 08:19:01 | 27.446 |
| 12/20/2010 02:04:01 | 24.002 | 12/18/2010 08:39:01 | 27.446 |
| 12/20/2010 02:24:01 | 24.002 | 12/18/2010 08:59:01 | 27.446 |
| 12/20/2010 02:44:01 | 24.064 | 12/18/2010 09:19:01 | 27.446 |
| 12/20/2010 03:04:01 | 24.127 | 12/18/2010 09:39:01 | 27.384 |
| 12/20/2010 03:24:01 | 24.127 | 12/18/2010 09:59:01 | 27.384 |
| 12/20/2010 03:44:01 | 23.939 | 12/18/2010 10:19:01 | 27.384 |
| 12/20/2010 04:04:01 | 23.814 | 12/18/2010 10:39:01 | 27.384 |
| 12/20/2010 04:24:01 | 23.752 | 12/18/2010 10:59:01 | 27.384 |
| 12/20/2010 04:44:01 | 23.689 | 12/18/2010 11:19:01 | 27.384 |
| 12/20/2010 05:04:01 | 23.627 | 12/18/2010 11:39:01 | 27.384 |
| 12/20/2010 05:24:01 | 23.564 | 12/18/2010 11:59:01 | 27.384 |
| 12/20/2010 05:44:01 | 23.564 | 12/18/2010 12:19:01 | 27.384 |
| 12/20/2010 06:04:01 | 23.564 | 12/18/2010 12:39:01 | 27.384 |
| 12/20/2010 06:24:01 | 23.752 | 12/18/2010 12:59:01 | 27.384 |
| 12/20/2010 06:44:01 | 23.877 | 12/18/2010 13:19:01 | 27.384 |
| 12/20/2010 07:04:01 | 24.127 | 12/18/2010 13:39:01 | 27.446 |
| 12/20/2010 07:24:01 | 24.314 | 12/18/2010 13:59:01 | 27.446 |
| 12/20/2010 07:44:01 | 24.377 | 12/18/2010 14:19:01 | 27.446 |
| 12/20/2010 08:04:01 | 24.689 | 12/18/2010 14:39:01 | 27.509 |
| 12/20/2010 08:24:01 | 25.502 | 12/18/2010 14:59:01 | 27.509 |
| 12/20/2010 08:44:01 | 25.752 | 12/18/2010 15:19:01 | 27.509 |
| 12/20/2010 09:04:01 | 26.314 | 12/18/2010 15:39:01 | 27.571 |
| 12/20/2010 09:24:01 | 26.502 | 12/18/2010 15:59:01 | 27.571 |
| 12/20/2010 09:44:01 | 27.126 | 12/18/2010 16:19:01 | 27.571 |
| 12/20/2010 10:04:01 | 28.001 | 12/18/2010 16:39:01 | 27.634 |
| 12/20/2010 10:24:01 | 27.751 | 12/18/2010 16:59:01 | 27.634 |
| 12/20/2010 10:44:01 | 28.188 | 12/18/2010 17:19:01 | 27.696 |
| 12/20/2010 11:04:01 | 28.313 | 12/18/2010 17:39:01 | 27.696 |
| 12/20/2010 11:24:01 | 28.500 | 12/18/2010 17:59:01 | 27.696 |
| 12/20/2010 11:44:01 | 28.313 | 12/18/2010 18:19:01 | 27.759 |
| 12/20/2010 12:04:01 | 28.063 | 12/18/2010 18:39:01 | 27.759 |
| 12/20/2010 12:24:01 | 28.126 | 12/18/2010 18:59:01 | 27.759 |
| 12/20/2010 12:44:01 | 28.001 | 12/18/2010 19:19:01 | 27.759 |
| 12/20/2010 13:04:01 | 28.313 | 12/18/2010 19:39:01 | 27.821 |
| 12/20/2010 13:24:01 | 28.813 | 12/18/2010 19:59:01 | 27.821 |
| 12/20/2010 13:44:01 | 29.312 | 12/18/2010 20:19:01 | 27.821 |
| 12/20/2010 14:04:01 | 28.563 | 12/18/2010 20:39:01 | 27.821 |
| 12/20/2010 14:24:01 | 27.876 | 12/18/2010 20:59:01 | 27.821 |
| 12/20/2010 14:44:01 | 27.439 | 12/18/2010 21:19:01 | 27.759 |

|                     |        |                     |        |
|---------------------|--------|---------------------|--------|
| 12/20/2010 15:04:01 | 26.939 | 12/18/2010 21:39:01 | 27.821 |
| 12/20/2010 15:24:01 | 26.439 | 12/18/2010 21:59:01 | 27.759 |
| 12/20/2010 15:44:01 | 25.877 | 12/18/2010 22:19:01 | 27.759 |
| 12/20/2010 16:04:01 | 25.127 | 12/18/2010 22:39:01 | 27.759 |
| 12/20/2010 16:24:01 | 24.689 | 12/18/2010 22:59:01 | 27.759 |
| 12/20/2010 16:44:01 | 24.814 | 12/18/2010 23:19:01 | 27.759 |
| 12/20/2010 17:04:01 | 24.814 | 12/18/2010 23:39:01 | 27.759 |
| 12/20/2010 17:24:01 | 24.564 | 12/18/2010 23:59:01 | 27.759 |
| 12/20/2010 17:44:01 | 24.377 | 12/19/2010 00:19:01 | 27.696 |
| 12/20/2010 18:04:01 | 24.189 | 12/19/2010 00:39:01 | 27.696 |
| 12/20/2010 18:24:01 | 23.814 | 12/19/2010 00:59:01 | 27.696 |
| 12/20/2010 18:44:01 | 23.564 | 12/19/2010 01:19:01 | 27.696 |
| 12/20/2010 19:04:01 | 23.376 | 12/19/2010 01:39:01 | 27.696 |
| 12/20/2010 19:24:01 | 23.126 | 12/19/2010 01:59:01 | 27.696 |
| 12/20/2010 19:44:01 | 22.876 | 12/19/2010 02:19:01 | 27.696 |
| 12/20/2010 20:04:01 | 22.688 | 12/19/2010 02:39:01 | 27.634 |
| 12/20/2010 20:24:01 | 22.438 | 12/19/2010 02:59:01 | 27.634 |
| 12/20/2010 20:44:01 | 22.125 | 12/19/2010 03:19:01 | 27.634 |
| 12/20/2010 21:04:01 | 22.063 | 12/19/2010 03:39:01 | 27.634 |
| 12/20/2010 21:24:01 | 22.000 | 12/19/2010 03:59:01 | 27.571 |
| 12/20/2010 21:44:01 | 22.063 | 12/19/2010 04:19:01 | 27.571 |
| 12/20/2010 22:04:01 | 22.063 | 12/19/2010 04:39:01 | 27.571 |
| 12/20/2010 22:24:01 | 22.251 | 12/19/2010 04:59:01 | 27.571 |
| 12/20/2010 22:44:01 | 22.501 | 12/19/2010 05:19:01 | 27.571 |
| 12/20/2010 23:04:01 | 22.563 | 12/19/2010 05:39:01 | 27.571 |
| 12/20/2010 23:24:01 | 22.626 | 12/19/2010 05:59:01 | 27.571 |
| 12/20/2010 23:44:01 | 22.626 | 12/19/2010 06:19:01 | 27.509 |
| 12/21/2010 00:04:01 | 22.688 | 12/19/2010 06:39:01 | 27.509 |
| 12/21/2010 00:24:01 | 22.751 | 12/19/2010 06:59:01 | 27.509 |
| 12/21/2010 00:44:01 | 22.876 | 12/19/2010 07:19:01 | 27.509 |
| 12/21/2010 01:04:01 | 22.876 | 12/19/2010 07:39:01 | 27.446 |
| 12/21/2010 01:24:01 | 22.939 | 12/19/2010 07:59:01 | 27.446 |
| 12/21/2010 01:44:01 | 22.876 | 12/19/2010 08:19:01 | 27.446 |
| 12/21/2010 02:04:01 | 22.751 | 12/19/2010 08:39:01 | 27.446 |
| 12/21/2010 02:24:01 | 22.751 | 12/19/2010 08:59:01 | 27.384 |
| 12/21/2010 02:44:01 | 22.751 | 12/19/2010 09:19:01 | 27.384 |
| 12/21/2010 03:04:01 | 22.626 | 12/19/2010 09:39:01 | 27.384 |
| 12/21/2010 03:24:01 | 22.501 | 12/19/2010 09:59:01 | 27.384 |
| 12/21/2010 03:44:01 | 22.313 | 12/19/2010 10:19:01 | 27.384 |
| 12/21/2010 04:04:01 | 22.063 | 12/19/2010 10:39:01 | 27.321 |
| 12/21/2010 04:24:01 | 21.813 | 12/19/2010 10:59:01 | 27.321 |
| 12/21/2010 04:44:01 | 21.500 | 12/19/2010 11:19:01 | 27.321 |
| 12/21/2010 05:04:01 | 21.249 | 12/19/2010 11:39:01 | 27.321 |
| 12/21/2010 05:24:01 | 21.249 | 12/19/2010 11:59:01 | 27.321 |
| 12/21/2010 05:44:01 | 21.375 | 12/19/2010 12:19:01 | 27.321 |
| 12/21/2010 06:04:01 | 21.813 | 12/19/2010 12:39:01 | 27.321 |
| 12/21/2010 06:24:01 | 22.501 | 12/19/2010 12:59:01 | 27.321 |
| 12/21/2010 06:44:01 | 23.251 | 12/19/2010 13:19:01 | 27.321 |
| 12/21/2010 07:04:01 | 24.314 | 12/19/2010 13:39:01 | 27.321 |
| 12/21/2010 07:24:01 | 25.002 | 12/19/2010 13:59:01 | 27.321 |



|                     |        |                     |        |
|---------------------|--------|---------------------|--------|
| 12/21/2010 07:44:01 | 26.064 | 12/19/2010 14:19:01 | 27.321 |
| 12/21/2010 08:04:01 | 26.939 | 12/19/2010 14:39:01 | 27.321 |
| 12/21/2010 08:24:01 | 27.938 | 12/19/2010 14:59:01 | 27.321 |
| 12/21/2010 08:44:01 | 28.188 | 12/19/2010 15:19:01 | 27.321 |
| 12/21/2010 09:04:01 | 29.374 | 12/19/2010 15:39:01 | 27.384 |
| 12/21/2010 09:24:01 | 29.374 | 12/19/2010 15:59:01 | 27.384 |
| 12/21/2010 09:44:01 | 30.435 | 12/19/2010 16:19:01 | 27.384 |
| 12/21/2010 10:04:01 | 32.057 | 12/19/2010 16:39:01 | 27.384 |
| 12/21/2010 10:24:01 | 31.184 | 12/19/2010 16:59:01 | 27.384 |
| 12/21/2010 10:44:01 | 29.374 | 12/19/2010 17:19:01 | 27.384 |
| 12/21/2010 11:04:01 | 28.625 | 12/19/2010 17:39:01 | 27.384 |
| 12/21/2010 11:24:01 | 27.751 | 12/19/2010 17:59:01 | 27.384 |
| 12/21/2010 11:44:01 | 26.377 | 12/19/2010 18:19:01 | 27.446 |
| 12/21/2010 12:04:01 | 26.627 | 12/19/2010 18:39:01 | 27.446 |
| 12/21/2010 12:24:01 | 26.689 | 12/19/2010 18:59:01 | 27.446 |
| 12/21/2010 12:44:01 | 26.877 | 12/19/2010 19:19:01 | 27.446 |
| 12/21/2010 13:04:01 | 28.813 | 12/19/2010 19:39:01 | 27.446 |
| 12/21/2010 13:24:01 | 28.251 | 12/19/2010 19:59:01 | 27.446 |
| 12/21/2010 13:44:01 | 27.314 | 12/19/2010 20:19:01 | 27.446 |
| 12/21/2010 14:04:01 | 30.311 | 12/19/2010 20:39:01 | 27.446 |
| 12/21/2010 14:24:01 | 32.681 | 12/19/2010 20:59:01 | 27.446 |
| 12/21/2010 14:44:01 | 33.990 | 12/19/2010 21:19:01 | 27.446 |
| 12/21/2010 15:04:01 | 32.931 | 12/19/2010 21:39:01 | 27.446 |
| 12/21/2010 15:24:01 | 32.120 | 12/19/2010 21:59:01 | 27.446 |
| 12/21/2010 15:44:01 | 31.683 | 12/19/2010 22:19:01 | 27.446 |
| 12/21/2010 16:04:01 | 31.247 | 12/19/2010 22:39:01 | 27.446 |
| 12/21/2010 16:24:01 | 31.434 | 12/19/2010 22:59:01 | 27.446 |
| 12/21/2010 16:44:01 | 30.685 | 12/19/2010 23:19:01 | 27.446 |
| 12/21/2010 17:04:01 | 29.562 | 12/19/2010 23:39:01 | 27.384 |
| 12/21/2010 17:24:01 | 28.937 | 12/19/2010 23:59:01 | 27.384 |
| 12/21/2010 17:44:01 | 28.313 | 12/20/2010 00:19:01 | 27.384 |
| 12/21/2010 18:04:01 | 27.689 | 12/20/2010 00:39:01 | 27.384 |
| 12/21/2010 18:24:01 | 26.814 | 12/20/2010 00:59:01 | 27.384 |
| 12/21/2010 18:44:01 | 25.877 | 12/20/2010 01:19:01 | 27.384 |
| 12/21/2010 19:04:01 | 25.189 | 12/20/2010 01:39:01 | 27.384 |
| 12/21/2010 19:24:01 | 24.877 | 12/20/2010 01:59:01 | 27.384 |
| 12/21/2010 19:44:01 | 24.564 | 12/20/2010 02:19:01 | 27.384 |
| 12/21/2010 20:04:01 | 24.252 | 12/20/2010 02:39:01 | 27.321 |
| 12/21/2010 20:24:01 | 24.189 | 12/20/2010 02:59:01 | 27.321 |
| 12/21/2010 20:44:01 | 24.127 | 12/20/2010 03:19:01 | 27.321 |
| 12/21/2010 21:04:01 | 24.127 | 12/20/2010 03:39:01 | 27.321 |
| 12/21/2010 21:24:01 | 23.814 | 12/20/2010 03:59:01 | 27.321 |
| 12/21/2010 21:44:01 | 23.564 | 12/20/2010 04:19:01 | 27.321 |
| 12/21/2010 22:04:01 | 23.251 | 12/20/2010 04:39:01 | 27.259 |
| 12/21/2010 22:24:01 | 22.939 | 12/20/2010 04:59:01 | 27.259 |
| 12/21/2010 22:44:01 | 22.814 | 12/20/2010 05:19:01 | 27.259 |
| 12/21/2010 23:04:01 | 22.626 | 12/20/2010 05:39:01 | 27.259 |
| 12/21/2010 23:24:01 | 22.376 | 12/20/2010 05:59:01 | 27.259 |
| 12/21/2010 23:44:01 | 22.188 | 12/20/2010 06:19:01 | 27.259 |
| 12/22/2010 00:04:01 | 21.938 | 12/20/2010 06:39:01 | 27.197 |

|                     |        |                     |        |
|---------------------|--------|---------------------|--------|
| 12/22/2010 00:24:01 | 21.813 | 12/20/2010 06:59:01 | 27.197 |
| 12/22/2010 00:44:01 | 21.687 | 12/20/2010 07:19:01 | 27.197 |
| 12/22/2010 01:04:01 | 21.562 | 12/20/2010 07:39:01 | 27.197 |
| 12/22/2010 01:24:01 | 21.437 | 12/20/2010 07:59:01 | 27.197 |
| 12/22/2010 01:44:01 | 21.312 | 12/20/2010 08:19:01 | 27.197 |
| 12/22/2010 02:04:01 | 21.249 | 12/20/2010 08:39:01 | 27.197 |
| 12/22/2010 02:24:01 | 21.124 | 12/20/2010 08:59:01 | 27.134 |
| 12/22/2010 02:44:01 | 21.062 | 12/20/2010 09:19:01 | 27.134 |
| 12/22/2010 03:04:01 | 20.999 | 12/20/2010 09:39:01 | 27.134 |
| 12/22/2010 03:24:01 | 20.937 | 12/20/2010 09:59:01 | 27.134 |
| 12/22/2010 03:44:01 | 20.749 | 12/20/2010 10:19:01 | 27.134 |
| 12/22/2010 04:04:01 | 20.624 | 12/20/2010 10:39:01 | 27.134 |
| 12/22/2010 04:24:01 | 20.561 | 12/20/2010 10:59:01 | 27.134 |
| 12/22/2010 04:44:01 | 20.436 | 12/20/2010 11:19:01 | 27.072 |
| 12/22/2010 05:04:01 | 20.373 | 12/20/2010 11:39:01 | 27.072 |
| 12/22/2010 05:24:01 | 20.311 | 12/20/2010 11:59:01 | 27.072 |
| 12/22/2010 05:44:01 | 20.373 | 12/20/2010 12:19:01 | 27.072 |
| 12/22/2010 06:04:01 | 20.749 | 12/20/2010 12:39:01 | 27.072 |
| 12/22/2010 06:24:01 | 21.437 | 12/20/2010 12:59:01 | 27.072 |
| 12/22/2010 06:44:01 | 22.376 | 12/20/2010 13:19:01 | 27.072 |
| 12/22/2010 07:04:01 | 23.689 | 12/20/2010 13:39:01 | 27.072 |
| 12/22/2010 07:24:01 | 25.127 | 12/20/2010 13:59:01 | 27.072 |
| 12/22/2010 07:44:01 | 26.689 | 12/20/2010 14:19:01 | 27.134 |
| 12/22/2010 08:04:01 | 28.188 | 12/20/2010 14:39:01 | 27.134 |
| 12/22/2010 08:24:01 | 28.625 | 12/20/2010 14:59:01 | 27.134 |
| 12/22/2010 08:44:01 | 29.250 | 12/20/2010 15:19:01 | 27.134 |
| 12/22/2010 09:04:01 | 30.248 | 12/20/2010 15:39:01 | 27.134 |
| 12/22/2010 09:24:01 | 31.122 | 12/20/2010 15:59:01 | 27.134 |
| 12/22/2010 09:44:01 | 31.808 | 12/20/2010 16:19:01 | 27.134 |
| 12/22/2010 10:04:01 | 32.307 | 12/20/2010 16:39:01 | 27.134 |
| 12/22/2010 10:24:01 | 32.120 | 12/20/2010 16:59:01 | 27.134 |
| 12/22/2010 10:44:01 | 32.931 | 12/20/2010 17:19:01 | 27.134 |
| 12/22/2010 11:04:01 | 32.993 | 12/20/2010 17:39:01 | 27.134 |
| 12/22/2010 11:24:01 | 34.364 | 12/20/2010 17:59:01 | 27.134 |
| 12/22/2010 11:44:01 | 35.050 | 12/20/2010 18:19:01 | 27.134 |
| 12/22/2010 12:04:01 | 35.237 | 12/20/2010 18:39:01 | 27.134 |
| 12/22/2010 12:24:01 | 35.673 | 12/20/2010 18:59:01 | 27.134 |
| 12/22/2010 12:44:01 | 36.670 | 12/20/2010 19:19:01 | 27.134 |
| 12/22/2010 13:04:01 | 35.798 | 12/20/2010 19:39:01 | 27.134 |
| 12/22/2010 13:24:01 | 33.803 | 12/20/2010 19:59:01 | 27.134 |
| 12/22/2010 13:44:01 | 35.548 | 12/20/2010 20:19:01 | 27.134 |
| 12/22/2010 14:04:01 | 35.050 | 12/20/2010 20:39:01 | 27.134 |
| 12/22/2010 14:24:01 | 35.922 | 12/20/2010 20:59:01 | 27.134 |
| 12/22/2010 14:44:01 | 35.922 | 12/20/2010 21:19:01 | 27.134 |
| 12/22/2010 15:04:01 | 34.925 | 12/20/2010 21:39:01 | 27.134 |
| 12/22/2010 15:24:01 | 32.369 | 12/20/2010 21:59:01 | 27.134 |
| 12/22/2010 15:44:01 | 32.931 | 12/20/2010 22:19:01 | 27.134 |
| 12/22/2010 16:04:01 | 32.556 | 12/20/2010 22:39:01 | 27.072 |
| 12/22/2010 16:24:01 | 32.182 | 12/20/2010 22:59:01 | 27.072 |
| 12/22/2010 16:44:01 | 31.621 | 12/20/2010 23:19:01 | 27.072 |

|                     |        |                     |        |
|---------------------|--------|---------------------|--------|
| 12/22/2010 17:04:01 | 31.122 | 12/20/2010 23:39:01 | 27.072 |
| 12/22/2010 17:24:01 | 30.435 | 12/20/2010 23:59:01 | 27.072 |
| 12/22/2010 17:44:01 | 29.811 | 12/21/2010 00:19:01 | 27.072 |
| 12/22/2010 18:04:01 | 29.187 | 12/21/2010 00:39:01 | 27.009 |
| 12/22/2010 18:24:01 | 28.625 | 12/21/2010 00:59:01 | 27.009 |
| 12/22/2010 18:44:01 | 28.126 | 12/21/2010 01:19:01 | 27.009 |
| 12/22/2010 19:04:01 | 27.689 | 12/21/2010 01:39:01 | 27.009 |
| 12/22/2010 19:24:01 | 27.064 | 12/21/2010 01:59:01 | 27.009 |
| 12/22/2010 19:44:01 | 26.627 | 12/21/2010 02:19:01 | 26.947 |
| 12/22/2010 20:04:01 | 26.377 | 12/21/2010 02:39:01 | 26.947 |
| 12/22/2010 20:24:01 | 25.752 | 12/21/2010 02:59:01 | 26.947 |
| 12/22/2010 20:44:01 | 25.189 | 12/21/2010 03:19:01 | 26.947 |
| 12/22/2010 21:04:01 | 24.814 | 12/21/2010 03:39:01 | 26.947 |
| 12/22/2010 21:24:01 | 24.689 | 12/21/2010 03:59:01 | 26.884 |
| 12/22/2010 21:44:01 | 24.502 | 12/21/2010 04:19:01 | 26.884 |
| 12/22/2010 22:04:01 | 24.252 | 12/21/2010 04:39:01 | 26.884 |
| 12/22/2010 22:24:01 | 24.127 | 12/21/2010 04:59:01 | 26.884 |
| 12/22/2010 22:44:01 | 24.064 | 12/21/2010 05:19:01 | 26.884 |
| 12/22/2010 23:04:01 | 24.189 | 12/21/2010 05:39:01 | 26.822 |
| 12/22/2010 23:24:01 | 23.939 | 12/21/2010 05:59:01 | 26.822 |
| 12/22/2010 23:44:01 | 23.627 | 12/21/2010 06:19:01 | 26.822 |
| 12/23/2010 00:04:01 | 23.752 | 12/21/2010 06:39:01 | 26.822 |
| 12/23/2010 00:24:01 | 23.752 | 12/21/2010 06:59:01 | 26.822 |
| 12/23/2010 00:44:01 | 23.501 | 12/21/2010 07:19:01 | 26.759 |
| 12/23/2010 01:04:01 | 23.314 | 12/21/2010 07:39:01 | 26.759 |
| 12/23/2010 01:24:01 | 23.126 | 12/21/2010 07:59:01 | 26.759 |
| 12/23/2010 01:44:01 | 23.001 | 12/21/2010 08:19:01 | 26.759 |
| 12/23/2010 02:04:01 | 22.814 | 12/21/2010 08:39:01 | 26.759 |
| 12/23/2010 02:24:01 | 22.626 | 12/21/2010 08:59:01 | 26.697 |
| 12/23/2010 02:44:01 | 22.563 | 12/21/2010 09:19:01 | 26.697 |
| 12/23/2010 03:04:01 | 22.626 | 12/21/2010 09:39:01 | 26.697 |
| 12/23/2010 03:24:01 | 22.688 | 12/21/2010 09:59:01 | 26.697 |
| 12/23/2010 03:44:01 | 22.626 | 12/21/2010 10:19:01 | 26.697 |
| 12/23/2010 04:04:01 | 22.563 | 12/21/2010 10:39:01 | 26.697 |
| 12/23/2010 04:24:01 | 22.438 | 12/21/2010 10:59:01 | 26.697 |
| 12/23/2010 04:44:01 | 22.438 | 12/21/2010 11:19:01 | 26.697 |
| 12/23/2010 05:04:01 | 22.313 | 12/21/2010 11:39:01 | 26.697 |
| 12/23/2010 05:24:01 | 22.251 | 12/21/2010 11:59:01 | 26.697 |
| 12/23/2010 05:44:01 | 22.251 | 12/21/2010 12:19:01 | 26.697 |
| 12/23/2010 06:04:01 | 22.814 | 12/21/2010 12:39:01 | 26.697 |
| 12/23/2010 06:24:01 | 23.564 | 12/21/2010 12:59:01 | 26.697 |
| 12/23/2010 06:44:01 | 24.564 | 12/21/2010 13:19:01 | 26.697 |
| 12/23/2010 07:04:01 | 26.189 | 12/21/2010 13:39:01 | 26.759 |
| 12/23/2010 07:24:01 | 27.314 | 12/21/2010 13:59:01 | 26.759 |
| 12/23/2010 07:44:01 | 28.688 | 12/21/2010 14:19:01 | 26.759 |
| 12/23/2010 08:04:01 | 28.438 | 12/21/2010 14:39:01 | 26.759 |
| 12/23/2010 08:24:01 | 30.186 | 12/21/2010 14:59:01 | 26.759 |
| 12/23/2010 08:44:01 | 29.250 | 12/21/2010 15:19:01 | 26.822 |
| 12/23/2010 09:04:01 | 30.311 | 12/21/2010 15:39:01 | 26.822 |
| 12/23/2010 09:24:01 | 31.247 | 12/21/2010 15:59:01 | 26.822 |

|                     |        |                     |        |
|---------------------|--------|---------------------|--------|
| 12/23/2010 09:44:01 | 33.679 | 12/21/2010 16:19:01 | 26.822 |
| 12/23/2010 10:04:01 | 34.302 | 12/21/2010 16:39:01 | 26.822 |
| 12/23/2010 10:24:01 | 30.935 | 12/21/2010 16:59:01 | 26.884 |
| 12/23/2010 10:44:01 | 26.877 | 12/21/2010 17:19:01 | 26.884 |
| 12/23/2010 11:04:01 | 27.938 | 12/21/2010 17:39:01 | 26.947 |
| 12/23/2010 11:24:01 | 29.374 | 12/21/2010 17:59:01 | 26.947 |
| 12/23/2010 11:44:01 | 30.810 | 12/21/2010 18:19:01 | 26.947 |
| 12/23/2010 12:04:01 | 32.556 | 12/21/2010 18:39:01 | 27.009 |
| 12/23/2010 12:24:01 | 30.685 | 12/21/2010 18:59:01 | 27.009 |
| 12/23/2010 12:44:01 | 32.057 | 12/21/2010 19:19:01 | 27.009 |
| 12/23/2010 13:04:01 | 29.125 | 12/21/2010 19:39:01 | 27.072 |
| 12/23/2010 13:24:01 | 26.939 | 12/21/2010 19:59:01 | 27.072 |
| 12/23/2010 13:44:01 | 27.251 | 12/21/2010 20:19:01 | 27.072 |
| 12/23/2010 14:04:01 | 29.000 | 12/21/2010 20:39:01 | 27.072 |
| 12/23/2010 14:24:01 | 29.624 | 12/21/2010 20:59:01 | 27.072 |
| 12/23/2010 14:44:01 | 28.376 | 12/21/2010 21:19:01 | 27.072 |
| 12/23/2010 15:04:01 | 28.625 | 12/21/2010 21:39:01 | 27.134 |
| 12/23/2010 15:24:01 | 29.250 | 12/21/2010 21:59:01 | 27.134 |
| 12/23/2010 15:44:01 | 29.687 | 12/21/2010 22:19:01 | 27.134 |
| 12/23/2010 16:04:01 | 29.936 | 12/21/2010 22:39:01 | 27.134 |
| 12/23/2010 16:24:01 | 29.811 | 12/21/2010 22:59:01 | 27.134 |
| 12/23/2010 16:44:01 | 30.248 | 12/21/2010 23:19:01 | 27.134 |
| 12/23/2010 17:04:01 | 30.373 | 12/21/2010 23:39:01 | 27.134 |
| 12/23/2010 17:24:01 | 29.499 | 12/21/2010 23:59:01 | 27.072 |
| 12/23/2010 17:44:01 | 28.750 | 12/22/2010 00:19:01 | 27.072 |
| 12/23/2010 18:04:01 | 27.813 | 12/22/2010 00:39:01 | 27.072 |
| 12/23/2010 18:24:01 | 27.501 | 12/22/2010 00:59:01 | 27.072 |
| 12/23/2010 18:44:01 | 27.126 | 12/22/2010 01:19:01 | 27.072 |
| 12/23/2010 19:04:01 | 26.564 | 12/22/2010 01:39:01 | 27.072 |
| 12/23/2010 19:24:01 | 26.064 | 12/22/2010 01:59:01 | 27.072 |
| 12/23/2010 19:44:01 | 25.752 | 12/22/2010 02:19:01 | 27.072 |
| 12/23/2010 20:04:01 | 25.377 | 12/22/2010 02:39:01 | 27.009 |
| 12/23/2010 20:24:01 | 25.127 | 12/22/2010 02:59:01 | 27.009 |
| 12/23/2010 20:44:01 | 24.877 | 12/22/2010 03:19:01 | 27.009 |
| 12/23/2010 21:04:01 | 24.814 | 12/22/2010 03:39:01 | 27.009 |
| 12/23/2010 21:24:01 | 24.752 | 12/22/2010 03:59:01 | 27.009 |
| 12/23/2010 21:44:01 | 24.627 | 12/22/2010 04:19:01 | 26.947 |
| 12/23/2010 22:04:01 | 24.439 | 12/22/2010 04:39:01 | 26.947 |
| 12/23/2010 22:24:01 | 24.252 | 12/22/2010 04:59:01 | 26.947 |
| 12/23/2010 22:44:01 | 24.189 | 12/22/2010 05:19:01 | 26.884 |
| 12/23/2010 23:04:01 | 24.127 | 12/22/2010 05:39:01 | 26.884 |
| 12/23/2010 23:24:01 | 24.002 | 12/22/2010 05:59:01 | 26.884 |
| 12/23/2010 23:44:01 | 23.814 | 12/22/2010 06:19:01 | 26.884 |
| 12/24/2010 00:04:01 | 23.627 | 12/22/2010 06:39:01 | 26.822 |
| 12/24/2010 00:24:01 | 23.564 | 12/22/2010 06:59:01 | 26.822 |
| 12/24/2010 00:44:01 | 23.439 | 12/22/2010 07:19:01 | 26.822 |
| 12/24/2010 01:04:01 | 23.314 | 12/22/2010 07:39:01 | 26.759 |
| 12/24/2010 01:24:01 | 23.126 | 12/22/2010 07:59:01 | 26.759 |
| 12/24/2010 01:44:01 | 23.001 | 12/22/2010 08:19:01 | 26.759 |
| 12/24/2010 02:04:01 | 22.939 | 12/22/2010 08:39:01 | 26.759 |

|                     |        |                     |        |
|---------------------|--------|---------------------|--------|
| 12/24/2010 02:24:01 | 22.939 | 12/22/2010 08:59:01 | 26.697 |
| 12/24/2010 02:44:01 | 22.751 | 12/22/2010 09:19:01 | 26.697 |
| 12/24/2010 03:04:01 | 22.626 | 12/22/2010 09:39:01 | 26.697 |
| 12/24/2010 03:24:01 | 22.563 | 12/22/2010 09:59:01 | 26.697 |
| 12/24/2010 03:44:01 | 22.438 | 12/22/2010 10:19:01 | 26.634 |
| 12/24/2010 04:04:01 | 22.376 | 12/22/2010 10:39:01 | 26.634 |
| 12/24/2010 04:24:01 | 22.313 | 12/22/2010 10:59:01 | 26.634 |
| 12/24/2010 04:44:01 | 22.251 | 12/22/2010 11:19:01 | 26.634 |
| 12/24/2010 05:04:01 | 22.063 | 12/22/2010 11:39:01 | 26.634 |
| 12/24/2010 05:24:01 | 22.188 | 12/22/2010 11:59:01 | 26.634 |
| 12/24/2010 05:44:01 | 22.313 | 12/22/2010 12:19:01 | 26.697 |
| 12/24/2010 06:04:01 | 22.751 | 12/22/2010 12:39:01 | 26.697 |
| 12/24/2010 06:24:01 | 23.501 | 12/22/2010 12:59:01 | 26.697 |
| 12/24/2010 06:44:01 | 24.502 | 12/22/2010 13:19:01 | 26.697 |
| 12/24/2010 07:04:01 | 25.752 | 12/22/2010 13:39:01 | 26.697 |
| 12/24/2010 07:24:01 | 26.502 | 12/22/2010 13:59:01 | 26.759 |
| 12/24/2010 07:44:01 | 27.689 | 12/22/2010 14:19:01 | 26.759 |
| 12/24/2010 08:04:01 | 28.937 | 12/22/2010 14:39:01 | 26.759 |
| 12/24/2010 08:24:01 | 29.374 | 12/22/2010 14:59:01 | 26.822 |
| 12/24/2010 08:44:01 | 29.811 | 12/22/2010 15:19:01 | 26.822 |
| 12/24/2010 09:04:01 | 30.311 | 12/22/2010 15:39:01 | 26.822 |
| 12/24/2010 09:24:01 | 31.496 | 12/22/2010 15:59:01 | 26.884 |
| 12/24/2010 09:44:01 | 33.866 | 12/22/2010 16:19:01 | 26.884 |
| 12/24/2010 10:04:01 | 34.177 | 12/22/2010 16:39:01 | 26.947 |
| 12/24/2010 10:24:01 | 32.057 | 12/22/2010 16:59:01 | 26.947 |
| 12/24/2010 10:44:01 | 34.177 | 12/22/2010 17:19:01 | 27.009 |
| 12/24/2010 11:04:01 | 34.801 | 12/22/2010 17:39:01 | 27.009 |
| 12/24/2010 11:24:01 | 36.109 | 12/22/2010 17:59:01 | 27.072 |
| 12/24/2010 11:44:01 | 34.364 | 12/22/2010 18:19:01 | 27.072 |
| 12/24/2010 12:04:01 | 32.931 | 12/22/2010 18:39:01 | 27.072 |
| 12/24/2010 12:24:01 | 26.252 | 12/22/2010 18:59:01 | 27.134 |
| 12/24/2010 12:44:01 | 25.627 | 12/22/2010 19:19:01 | 27.134 |
| 12/24/2010 13:04:01 | 27.189 | 12/22/2010 19:39:01 | 27.134 |
| 12/24/2010 13:24:01 | 29.250 | 12/22/2010 19:59:01 | 27.197 |
| 12/24/2010 13:44:01 | 30.872 | 12/22/2010 20:19:01 | 27.197 |
| 12/24/2010 14:04:01 | 32.245 | 12/22/2010 20:39:01 | 27.197 |
| 12/24/2010 14:24:01 | 31.933 | 12/22/2010 20:59:01 | 27.197 |
| 12/24/2010 14:44:01 | 30.498 | 12/22/2010 21:19:01 | 27.197 |
| 12/24/2010 15:04:01 | 29.999 | 12/22/2010 21:39:01 | 27.197 |
| 12/24/2010 15:24:01 | 29.312 | 12/22/2010 21:59:01 | 27.259 |
| 12/24/2010 15:44:01 | 28.500 | 12/22/2010 22:19:01 | 27.259 |
| 12/24/2010 16:04:01 | 27.564 | 12/22/2010 22:39:01 | 27.259 |
| 12/24/2010 16:24:01 | 26.877 | 12/22/2010 22:59:01 | 27.259 |
| 12/24/2010 16:44:01 | 26.064 | 12/22/2010 23:19:01 | 27.259 |
| 12/24/2010 17:04:01 | 25.752 | 12/22/2010 23:39:01 | 27.259 |
| 12/24/2010 17:24:01 | 25.689 | 12/22/2010 23:59:01 | 27.259 |
| 12/24/2010 17:44:01 | 25.502 | 12/23/2010 00:19:01 | 27.259 |
| 12/24/2010 18:04:01 | 25.064 | 12/23/2010 00:39:01 | 27.197 |
| 12/24/2010 18:24:01 | 24.877 | 12/23/2010 00:59:01 | 27.197 |
| 12/24/2010 18:44:01 | 24.752 | 12/23/2010 01:19:01 | 27.197 |

|                     |        |                     |        |
|---------------------|--------|---------------------|--------|
| 12/24/2010 19:04:01 | 24.627 | 12/23/2010 01:39:01 | 27.197 |
| 12/24/2010 19:24:01 | 24.377 | 12/23/2010 01:59:01 | 27.197 |
| 12/24/2010 19:44:01 | 23.439 | 12/23/2010 02:19:01 | 27.197 |
| 12/24/2010 20:04:01 | 22.939 | 12/23/2010 02:39:01 | 27.197 |
| 12/24/2010 20:24:01 | 22.876 | 12/23/2010 02:59:01 | 27.197 |
| 12/24/2010 20:44:01 | 22.876 | 12/23/2010 03:19:01 | 27.134 |
| 12/24/2010 21:04:01 | 22.876 | 12/23/2010 03:39:01 | 27.134 |
| 12/24/2010 21:24:01 | 22.939 | 12/23/2010 03:59:01 | 27.134 |
| 12/24/2010 21:44:01 | 22.876 | 12/23/2010 04:19:01 | 27.134 |
| 12/24/2010 22:04:01 | 22.814 | 12/23/2010 04:39:01 | 27.134 |
| 12/24/2010 22:24:01 | 22.814 | 12/23/2010 04:59:01 | 27.134 |
| 12/24/2010 22:44:01 | 22.814 | 12/23/2010 05:19:01 | 27.072 |
| 12/24/2010 23:04:01 | 22.688 | 12/23/2010 05:39:01 | 27.072 |
| 12/24/2010 23:24:01 | 22.563 | 12/23/2010 05:59:01 | 27.072 |
| 12/24/2010 23:44:01 | 22.688 | 12/23/2010 06:19:01 | 27.072 |
| 12/25/2010 00:04:01 | 22.501 | 12/23/2010 06:39:01 | 27.009 |
| 12/25/2010 00:24:01 | 22.438 | 12/23/2010 06:59:01 | 27.009 |
| 12/25/2010 00:44:01 | 22.563 | 12/23/2010 07:19:01 | 27.009 |
| 12/25/2010 01:04:01 | 22.626 | 12/23/2010 07:39:01 | 27.009 |
| 12/25/2010 01:24:01 | 22.626 | 12/23/2010 07:59:01 | 27.009 |
| 12/25/2010 01:44:01 | 22.376 | 12/23/2010 08:19:01 | 26.947 |
| 12/25/2010 02:04:01 | 22.125 | 12/23/2010 08:39:01 | 26.947 |
| 12/25/2010 02:24:01 | 21.938 | 12/23/2010 08:59:01 | 26.947 |
| 12/25/2010 02:44:01 | 21.750 | 12/23/2010 09:19:01 | 26.947 |
| 12/25/2010 03:04:01 | 21.687 | 12/23/2010 09:39:01 | 26.947 |
| 12/25/2010 03:24:01 | 21.750 | 12/23/2010 09:59:01 | 26.947 |
| 12/25/2010 03:44:01 | 21.750 | 12/23/2010 10:19:01 | 26.884 |
| 12/25/2010 04:04:01 | 21.625 | 12/23/2010 10:39:01 | 26.884 |
| 12/25/2010 04:24:01 | 21.437 | 12/23/2010 10:59:01 | 26.884 |
| 12/25/2010 04:44:01 | 21.249 | 12/23/2010 11:19:01 | 26.884 |
| 12/25/2010 05:04:01 | 21.124 | 12/23/2010 11:39:01 | 26.884 |
| 12/25/2010 05:24:01 | 20.937 | 12/23/2010 11:59:01 | 26.947 |
| 12/25/2010 05:44:01 | 20.937 | 12/23/2010 12:19:01 | 26.947 |
| 12/25/2010 06:04:01 | 21.187 | 12/23/2010 12:39:01 | 26.947 |
| 12/25/2010 06:24:01 | 21.750 | 12/23/2010 12:59:01 | 26.947 |
| 12/25/2010 06:44:01 | 22.501 | 12/23/2010 13:19:01 | 26.947 |
| 12/25/2010 07:04:01 | 23.439 | 12/23/2010 13:39:01 | 26.947 |
| 12/25/2010 07:24:01 | 24.627 | 12/23/2010 13:59:01 | 27.009 |
| 12/25/2010 07:44:01 | 25.689 | 12/23/2010 14:19:01 | 27.009 |
| 12/25/2010 08:04:01 | 26.627 | 12/23/2010 14:39:01 | 27.009 |
| 12/25/2010 08:24:01 | 27.126 | 12/23/2010 14:59:01 | 27.072 |
| 12/25/2010 08:44:01 | 27.376 | 12/23/2010 15:19:01 | 27.072 |
| 12/25/2010 09:04:01 | 28.063 | 12/23/2010 15:39:01 | 27.072 |
| 12/25/2010 09:24:01 | 28.937 | 12/23/2010 15:59:01 | 27.134 |
| 12/25/2010 09:44:01 | 31.184 | 12/23/2010 16:19:01 | 27.134 |
| 12/25/2010 10:04:01 | 30.935 | 12/23/2010 16:39:01 | 27.134 |
| 12/25/2010 10:24:01 | 32.120 | 12/23/2010 16:59:01 | 27.197 |
| 12/25/2010 10:44:01 | 32.931 | 12/23/2010 17:19:01 | 27.197 |
| 12/25/2010 11:04:01 | 32.993 | 12/23/2010 17:39:01 | 27.197 |
| 12/25/2010 11:24:01 | 31.558 | 12/23/2010 17:59:01 | 27.197 |

|                     |        |                     |        |
|---------------------|--------|---------------------|--------|
| 12/25/2010 11:44:01 | 30.935 | 12/23/2010 18:19:01 | 27.259 |
| 12/25/2010 12:04:01 | 31.746 | 12/23/2010 18:39:01 | 27.259 |
| 12/25/2010 12:24:01 | 34.614 | 12/23/2010 18:59:01 | 27.259 |
| 12/25/2010 12:44:01 | 32.681 | 12/23/2010 19:19:01 | 27.321 |
| 12/25/2010 13:04:01 | 33.429 | 12/23/2010 19:39:01 | 27.321 |
| 12/25/2010 13:24:01 | 35.237 | 12/23/2010 19:59:01 | 27.321 |
| 12/25/2010 13:44:01 | 34.240 | 12/23/2010 20:19:01 | 27.321 |
| 12/25/2010 14:04:01 | 31.496 | 12/23/2010 20:39:01 | 27.321 |
| 12/25/2010 14:24:01 | 35.175 | 12/23/2010 20:59:01 | 27.384 |
| 12/25/2010 14:44:01 | 36.109 | 12/23/2010 21:19:01 | 27.384 |
| 12/25/2010 15:04:01 | 35.424 | 12/23/2010 21:39:01 | 27.384 |
| 12/25/2010 15:24:01 | 33.180 | 12/23/2010 21:59:01 | 27.384 |
| 12/25/2010 15:44:01 | 33.180 | 12/23/2010 22:19:01 | 27.384 |
| 12/25/2010 16:04:01 | 32.931 | 12/23/2010 22:39:01 | 27.384 |
| 12/25/2010 16:24:01 | 32.619 | 12/23/2010 22:59:01 | 27.384 |
| 12/25/2010 16:44:01 | 32.182 | 12/23/2010 23:19:01 | 27.384 |
| 12/25/2010 17:04:01 | 31.558 | 12/23/2010 23:39:01 | 27.384 |
| 12/25/2010 17:24:01 | 30.935 | 12/23/2010 23:59:01 | 27.384 |
| 12/25/2010 17:44:01 | 30.123 | 12/24/2010 00:19:01 | 27.384 |
| 12/25/2010 18:04:01 | 29.499 | 12/24/2010 00:39:01 | 27.384 |
| 12/25/2010 18:24:01 | 28.750 | 12/24/2010 00:59:01 | 27.384 |
| 12/25/2010 18:44:01 | 28.126 | 12/24/2010 01:19:01 | 27.384 |
| 12/25/2010 19:04:01 | 27.564 | 12/24/2010 01:39:01 | 27.321 |
| 12/25/2010 19:24:01 | 27.189 | 12/24/2010 01:59:01 | 27.321 |
| 12/25/2010 19:44:01 | 26.689 | 12/24/2010 02:19:01 | 27.321 |
| 12/25/2010 20:04:01 | 26.189 | 12/24/2010 02:39:01 | 27.321 |
| 12/25/2010 20:24:01 | 25.439 | 12/24/2010 02:59:01 | 27.321 |
| 12/25/2010 20:44:01 | 24.939 | 12/24/2010 03:19:01 | 27.321 |
| 12/25/2010 21:04:01 | 24.752 | 12/24/2010 03:39:01 | 27.259 |
| 12/25/2010 21:24:01 | 24.502 | 12/24/2010 03:59:01 | 27.259 |
| 12/25/2010 21:44:01 | 24.314 | 12/24/2010 04:19:01 | 27.259 |
| 12/25/2010 22:04:01 | 23.939 | 12/24/2010 04:39:01 | 27.259 |
| 12/25/2010 22:24:01 | 23.752 | 12/24/2010 04:59:01 | 27.259 |
| 12/25/2010 22:44:01 | 23.501 | 12/24/2010 05:19:01 | 27.259 |
| 12/25/2010 23:04:01 | 23.627 | 12/24/2010 05:39:01 | 27.197 |
| 12/25/2010 23:24:01 | 23.877 | 12/24/2010 05:59:01 | 27.197 |
| 12/25/2010 23:44:01 | 23.939 | 12/24/2010 06:19:01 | 27.197 |
| 12/26/2010 00:04:01 | 23.877 | 12/24/2010 06:39:01 | 27.197 |
| 12/26/2010 00:24:01 | 23.939 | 12/24/2010 06:59:01 | 27.134 |
| 12/26/2010 00:44:01 | 23.939 | 12/24/2010 07:19:01 | 27.134 |
| 12/26/2010 01:04:01 | 23.877 | 12/24/2010 07:39:01 | 27.134 |
| 12/26/2010 01:24:01 | 23.689 | 12/24/2010 07:59:01 | 27.134 |
| 12/26/2010 01:44:01 | 23.564 | 12/24/2010 08:19:01 | 27.072 |
| 12/26/2010 02:04:01 | 23.689 | 12/24/2010 08:39:01 | 27.072 |
| 12/26/2010 02:24:01 | 23.564 | 12/24/2010 08:59:01 | 27.072 |
| 12/26/2010 02:44:01 | 23.627 | 12/24/2010 09:19:01 | 27.072 |
| 12/26/2010 03:04:01 | 23.564 | 12/24/2010 09:39:01 | 27.009 |
| 12/26/2010 03:24:01 | 23.689 | 12/24/2010 09:59:01 | 27.009 |
| 12/26/2010 03:44:01 | 23.689 | 12/24/2010 10:19:01 | 27.009 |
| 12/26/2010 04:04:01 | 23.439 | 12/24/2010 10:39:01 | 27.009 |

|                     |        |                     |        |
|---------------------|--------|---------------------|--------|
| 12/26/2010 04:24:01 | 23.314 | 12/24/2010 10:59:01 | 27.009 |
| 12/26/2010 04:44:01 | 23.376 | 12/24/2010 11:19:01 | 27.009 |
| 12/26/2010 05:04:01 | 23.627 | 12/24/2010 11:39:01 | 27.009 |
| 12/26/2010 05:24:01 | 23.814 | 12/24/2010 11:59:01 | 27.009 |
| 12/26/2010 05:44:01 | 23.627 | 12/24/2010 12:19:01 | 27.072 |
| 12/26/2010 06:04:01 | 24.064 | 12/24/2010 12:39:01 | 27.072 |
| 12/26/2010 06:24:01 | 24.689 | 12/24/2010 12:59:01 | 27.072 |
| 12/26/2010 06:44:01 | 25.189 | 12/24/2010 13:19:01 | 27.072 |
| 12/26/2010 07:04:01 | 25.939 | 12/24/2010 13:39:01 | 27.134 |
| 12/26/2010 07:24:01 | 26.752 | 12/24/2010 13:59:01 | 27.134 |
| 12/26/2010 07:44:01 | 27.626 | 12/24/2010 14:19:01 | 27.134 |
| 12/26/2010 08:04:01 | 28.813 | 12/24/2010 14:39:01 | 27.197 |
| 12/26/2010 08:24:01 | 29.187 | 12/24/2010 14:59:01 | 27.197 |
| 12/26/2010 08:44:01 | 29.187 | 12/24/2010 15:19:01 | 27.197 |
| 12/26/2010 09:04:01 | 29.874 | 12/24/2010 15:39:01 | 27.259 |
| 12/26/2010 09:24:01 | 30.935 | 12/24/2010 15:59:01 | 27.259 |
| 12/26/2010 09:44:01 | 32.494 | 12/24/2010 16:19:01 | 27.259 |
| 12/26/2010 10:04:01 | 34.053 | 12/24/2010 16:39:01 | 27.321 |
| 12/26/2010 10:24:01 | 33.928 | 12/24/2010 16:59:01 | 27.321 |
| 12/26/2010 10:44:01 | 34.551 | 12/24/2010 17:19:01 | 27.384 |
| 12/26/2010 11:04:01 | 35.424 | 12/24/2010 17:39:01 | 27.384 |
| 12/26/2010 11:24:01 | 35.922 | 12/24/2010 17:59:01 | 27.384 |
| 12/26/2010 11:44:01 | 36.171 | 12/24/2010 18:19:01 | 27.446 |
| 12/26/2010 12:04:01 | 36.919 | 12/24/2010 18:39:01 | 27.446 |
| 12/26/2010 12:24:01 | 37.417 | 12/24/2010 18:59:01 | 27.446 |
| 12/26/2010 12:44:01 | 37.604 | 12/24/2010 19:19:01 | 27.446 |
| 12/26/2010 13:04:01 | 38.102 | 12/24/2010 19:39:01 | 27.446 |
| 12/26/2010 13:24:01 | 38.351 | 12/24/2010 19:59:01 | 27.509 |
| 12/26/2010 13:44:01 | 38.724 | 12/24/2010 20:19:01 | 27.509 |
| 12/26/2010 14:04:01 | 36.856 | 12/24/2010 20:39:01 | 27.509 |
| 12/26/2010 14:24:01 | 36.421 | 12/24/2010 20:59:01 | 27.509 |
| 12/26/2010 14:44:01 | 37.541 | 12/24/2010 21:19:01 | 27.446 |
| 12/26/2010 15:04:01 | 36.607 | 12/24/2010 21:39:01 | 27.446 |
| 12/26/2010 15:24:01 | 34.551 | 12/24/2010 21:59:01 | 27.446 |
| 12/26/2010 15:44:01 | 34.240 | 12/24/2010 22:19:01 | 27.446 |
| 12/26/2010 16:04:01 | 32.806 | 12/24/2010 22:39:01 | 27.446 |
| 12/26/2010 16:24:01 | 31.309 | 12/24/2010 22:59:01 | 27.384 |
| 12/26/2010 16:44:01 | 31.247 | 12/24/2010 23:19:01 | 27.384 |
| 12/26/2010 17:04:01 | 30.435 | 12/24/2010 23:39:01 | 27.384 |
| 12/26/2010 17:24:01 | 29.999 | 12/24/2010 23:59:01 | 27.321 |
| 12/26/2010 17:44:01 | 29.374 | 12/25/2010 00:19:01 | 27.321 |
| 12/26/2010 18:04:01 | 28.937 | 12/25/2010 00:39:01 | 27.321 |
| 12/26/2010 18:24:01 | 29.374 | 12/25/2010 00:59:01 | 27.259 |
| 12/26/2010 18:44:01 | 29.125 | 12/25/2010 01:19:01 | 27.259 |
| 12/26/2010 19:04:01 | 28.688 | 12/25/2010 01:39:01 | 27.259 |
| 12/26/2010 19:24:01 | 28.251 | 12/25/2010 01:59:01 | 27.197 |
| 12/26/2010 19:44:01 | 27.689 | 12/25/2010 02:19:01 | 27.197 |
| 12/26/2010 20:04:01 | 27.251 | 12/25/2010 02:39:01 | 27.197 |
| 12/26/2010 20:24:01 | 26.752 | 12/25/2010 02:59:01 | 27.197 |
| 12/26/2010 20:44:01 | 26.127 | 12/25/2010 03:19:01 | 27.134 |



|                     |        |                     |        |
|---------------------|--------|---------------------|--------|
| 12/26/2010 21:04:01 | 25.564 | 12/25/2010 03:39:01 | 27.134 |
| 12/26/2010 21:24:01 | 24.939 | 12/25/2010 03:59:01 | 27.134 |
| 12/26/2010 21:44:01 | 24.439 | 12/25/2010 04:19:01 | 27.072 |
| 12/26/2010 22:04:01 | 24.127 | 12/25/2010 04:39:01 | 27.072 |
| 12/26/2010 22:24:01 | 23.814 | 12/25/2010 04:59:01 | 27.072 |
| 12/26/2010 22:44:01 | 23.564 | 12/25/2010 05:19:01 | 27.072 |
| 12/26/2010 23:04:01 | 23.376 | 12/25/2010 05:39:01 | 27.009 |
| 12/26/2010 23:24:01 | 23.376 | 12/25/2010 05:59:01 | 27.009 |
| 12/26/2010 23:44:01 | 23.251 | 12/25/2010 06:19:01 | 27.009 |
| 12/27/2010 00:04:01 | 23.752 | 12/25/2010 06:39:01 | 26.947 |
| 12/27/2010 00:24:01 | 23.689 | 12/25/2010 06:59:01 | 26.947 |
| 12/27/2010 00:44:01 | 23.439 | 12/25/2010 07:19:01 | 26.947 |
| 12/27/2010 01:04:01 | 23.689 | 12/25/2010 07:39:01 | 26.947 |
| 12/27/2010 01:24:01 | 23.627 | 12/25/2010 07:59:01 | 26.884 |
| 12/27/2010 01:44:01 | 23.627 | 12/25/2010 08:19:01 | 26.884 |
| 12/27/2010 02:04:01 | 23.752 | 12/25/2010 08:39:01 | 26.884 |
| 12/27/2010 02:24:01 | 24.002 | 12/25/2010 08:59:01 | 26.822 |
| 12/27/2010 02:44:01 | 24.252 | 12/25/2010 09:19:01 | 26.822 |
| 12/27/2010 03:04:01 | 24.252 | 12/25/2010 09:39:01 | 26.822 |
| 12/27/2010 03:24:01 | 24.064 | 12/25/2010 09:59:01 | 26.822 |
| 12/27/2010 03:44:01 | 23.814 | 12/25/2010 10:19:01 | 26.822 |
| 12/27/2010 04:04:01 | 23.814 | 12/25/2010 10:39:01 | 26.822 |
| 12/27/2010 04:24:01 | 23.814 | 12/25/2010 10:59:01 | 26.759 |
| 12/27/2010 04:44:01 | 23.752 | 12/25/2010 11:19:01 | 26.759 |
| 12/27/2010 05:04:01 | 23.501 | 12/25/2010 11:39:01 | 26.822 |
| 12/27/2010 05:24:01 | 23.376 | 12/25/2010 11:59:01 | 26.822 |
| 12/27/2010 05:44:01 | 23.189 | 12/25/2010 12:19:01 | 26.822 |
| 12/27/2010 06:04:01 | 23.314 | 12/25/2010 12:39:01 | 26.822 |
| 12/27/2010 06:24:01 | 23.689 | 12/25/2010 12:59:01 | 26.822 |
| 12/27/2010 06:44:01 | 24.377 | 12/25/2010 13:19:01 | 26.822 |
| 12/27/2010 07:04:01 | 25.377 | 12/25/2010 13:39:01 | 26.884 |
| 12/27/2010 07:24:01 | 26.127 | 12/25/2010 13:59:01 | 26.884 |
| 12/27/2010 07:44:01 | 27.689 | 12/25/2010 14:19:01 | 26.884 |
| 12/27/2010 08:04:01 | 28.813 | 12/25/2010 14:39:01 | 26.947 |
| 12/27/2010 08:24:01 | 29.062 | 12/25/2010 14:59:01 | 26.947 |
| 12/27/2010 08:44:01 | 29.687 | 12/25/2010 15:19:01 | 26.947 |
| 12/27/2010 09:04:01 | 30.186 | 12/25/2010 15:39:01 | 27.009 |
| 12/27/2010 09:24:01 | 29.499 | 12/25/2010 15:59:01 | 27.009 |
| 12/27/2010 09:44:01 | 32.369 | 12/25/2010 16:19:01 | 27.072 |
| 12/27/2010 10:04:01 | 32.806 | 12/25/2010 16:39:01 | 27.072 |
| 12/27/2010 10:24:01 | 33.990 | 12/25/2010 16:59:01 | 27.072 |
| 12/27/2010 10:44:01 | 33.928 | 12/25/2010 17:19:01 | 27.134 |
| 12/27/2010 11:04:01 | 33.990 | 12/25/2010 17:39:01 | 27.134 |
| 12/27/2010 11:24:01 | 32.556 | 12/25/2010 17:59:01 | 27.197 |
| 12/27/2010 11:44:01 | 34.115 | 12/25/2010 18:19:01 | 27.197 |
| 12/27/2010 12:04:01 | 34.863 | 12/25/2010 18:39:01 | 27.259 |
| 12/27/2010 12:24:01 | 35.611 | 12/25/2010 18:59:01 | 27.259 |
| 12/27/2010 12:44:01 | 36.421 | 12/25/2010 19:19:01 | 27.259 |
| 12/27/2010 13:04:01 | 34.427 | 12/25/2010 19:39:01 | 27.321 |
| 12/27/2010 13:24:01 | 33.741 | 12/25/2010 19:59:01 | 27.321 |

|                     |        |                     |        |
|---------------------|--------|---------------------|--------|
| 12/27/2010 13:44:01 | 35.424 | 12/25/2010 20:19:01 | 27.321 |
| 12/27/2010 14:04:01 | 34.863 | 12/25/2010 20:39:01 | 27.321 |
| 12/27/2010 14:24:01 | 36.856 | 12/25/2010 20:59:01 | 27.384 |
| 12/27/2010 14:44:01 | 35.424 | 12/25/2010 21:19:01 | 27.384 |
| 12/27/2010 15:04:01 | 33.492 | 12/25/2010 21:39:01 | 27.384 |
| 12/27/2010 15:24:01 | 34.614 | 12/25/2010 21:59:01 | 27.384 |
| 12/27/2010 15:44:01 | 34.177 | 12/25/2010 22:19:01 | 27.384 |
| 12/27/2010 16:04:01 | 32.931 | 12/25/2010 22:39:01 | 27.384 |
| 12/27/2010 16:24:01 | 32.743 | 12/25/2010 22:59:01 | 27.384 |
| 12/27/2010 16:44:01 | 32.120 | 12/25/2010 23:19:01 | 27.384 |
| 12/27/2010 17:04:01 | 31.371 | 12/25/2010 23:39:01 | 27.384 |
| 12/27/2010 17:24:01 | 30.685 | 12/25/2010 23:59:01 | 27.384 |
| 12/27/2010 17:44:01 | 29.874 | 12/26/2010 00:19:01 | 27.384 |
| 12/27/2010 18:04:01 | 28.875 | 12/26/2010 00:39:01 | 27.384 |
| 12/27/2010 18:24:01 | 28.188 | 12/26/2010 00:59:01 | 27.384 |
| 12/27/2010 18:44:01 | 27.501 | 12/26/2010 01:19:01 | 27.384 |
| 12/27/2010 19:04:01 | 26.752 | 12/26/2010 01:39:01 | 27.321 |
| 12/27/2010 19:24:01 | 26.439 | 12/26/2010 01:59:01 | 27.321 |
| 12/27/2010 19:44:01 | 26.564 | 12/26/2010 02:19:01 | 27.321 |
| 12/27/2010 20:04:01 | 26.314 | 12/26/2010 02:39:01 | 27.321 |
| 12/27/2010 20:24:01 | 26.064 | 12/26/2010 02:59:01 | 27.321 |
| 12/27/2010 20:44:01 | 26.127 | 12/26/2010 03:19:01 | 27.321 |
| 12/27/2010 21:04:01 | 26.627 | 12/26/2010 03:39:01 | 27.259 |
| 12/27/2010 21:24:01 | 26.564 | 12/26/2010 03:59:01 | 27.259 |
| 12/27/2010 21:44:01 | 26.377 | 12/26/2010 04:19:01 | 27.259 |
| 12/27/2010 22:04:01 | 26.564 | 12/26/2010 04:39:01 | 27.259 |
| 12/27/2010 22:24:01 | 26.564 | 12/26/2010 04:59:01 | 27.259 |
| 12/27/2010 22:44:01 | 26.439 | 12/26/2010 05:19:01 | 27.259 |
| 12/27/2010 23:04:01 | 26.314 | 12/26/2010 05:39:01 | 27.197 |
| 12/27/2010 23:24:01 | 26.002 | 12/26/2010 05:59:01 | 27.197 |
| 12/27/2010 23:44:01 | 25.689 | 12/26/2010 06:19:01 | 27.197 |
| 12/28/2010 00:04:01 | 25.377 | 12/26/2010 06:39:01 | 27.197 |
| 12/28/2010 00:24:01 | 25.502 | 12/26/2010 06:59:01 | 27.197 |
| 12/28/2010 00:44:01 | 25.314 | 12/26/2010 07:19:01 | 27.197 |
| 12/28/2010 01:04:01 | 24.127 | 12/26/2010 07:39:01 | 27.134 |
| 12/28/2010 01:24:01 | 22.939 | 12/26/2010 07:59:01 | 27.134 |
| 12/28/2010 01:44:01 | 22.751 | 12/26/2010 08:19:01 | 27.134 |
| 12/28/2010 02:04:01 | 22.501 | 12/26/2010 08:39:01 | 27.134 |
| 12/28/2010 02:24:01 | 22.501 | 12/26/2010 08:59:01 | 27.134 |
| 12/28/2010 02:44:01 | 22.438 | 12/26/2010 09:19:01 | 27.072 |
| 12/28/2010 03:04:01 | 22.438 | 12/26/2010 09:39:01 | 27.072 |
| 12/28/2010 03:24:01 | 22.438 | 12/26/2010 09:59:01 | 27.072 |
| 12/28/2010 03:44:01 | 22.438 | 12/26/2010 10:19:01 | 27.072 |
| 12/28/2010 04:04:01 | 22.501 | 12/26/2010 10:39:01 | 27.072 |
| 12/28/2010 04:24:01 | 22.501 | 12/26/2010 10:59:01 | 27.072 |
| 12/28/2010 04:44:01 | 22.501 | 12/26/2010 11:19:01 | 27.072 |
| 12/28/2010 05:04:01 | 22.501 | 12/26/2010 11:39:01 | 27.072 |
| 12/28/2010 05:24:01 | 22.688 | 12/26/2010 11:59:01 | 27.072 |
| 12/28/2010 05:44:01 | 22.876 | 12/26/2010 12:19:01 | 27.072 |
| 12/28/2010 06:04:01 | 23.064 | 12/26/2010 12:39:01 | 27.134 |

|                     |        |                     |        |
|---------------------|--------|---------------------|--------|
| 12/28/2010 06:24:01 | 22.939 | 12/26/2010 12:59:01 | 27.134 |
| 12/28/2010 06:44:01 | 23.376 | 12/26/2010 13:19:01 | 27.134 |
| 12/28/2010 07:04:01 | 23.877 | 12/26/2010 13:39:01 | 27.134 |
| 12/28/2010 07:24:01 | 24.314 | 12/26/2010 13:59:01 | 27.197 |
| 12/28/2010 07:44:01 | 24.377 | 12/26/2010 14:19:01 | 27.197 |
| 12/28/2010 08:04:01 | 24.814 | 12/26/2010 14:39:01 | 27.197 |
| 12/28/2010 08:24:01 | 25.127 | 12/26/2010 14:59:01 | 27.259 |
| 12/28/2010 08:44:01 | 25.564 | 12/26/2010 15:19:01 | 27.259 |
| 12/28/2010 09:04:01 | 27.064 | 12/26/2010 15:39:01 | 27.321 |
| 12/28/2010 09:24:01 | 27.689 | 12/26/2010 15:59:01 | 27.321 |
| 12/28/2010 09:44:01 | 29.624 | 12/26/2010 16:19:01 | 27.321 |
| 12/28/2010 10:04:01 | 30.498 | 12/26/2010 16:39:01 | 27.384 |
| 12/28/2010 10:24:01 | 30.560 | 12/26/2010 16:59:01 | 27.446 |
| 12/28/2010 10:44:01 | 31.496 | 12/26/2010 17:19:01 | 27.446 |
| 12/28/2010 11:04:01 | 31.683 | 12/26/2010 17:39:01 | 27.509 |
| 12/28/2010 11:24:01 | 32.619 | 12/26/2010 17:59:01 | 27.509 |
| 12/28/2010 11:44:01 | 32.245 | 12/26/2010 18:19:01 | 27.571 |
| 12/28/2010 12:04:01 | 31.746 | 12/26/2010 18:39:01 | 27.571 |
| 12/28/2010 12:24:01 | 31.933 | 12/26/2010 18:59:01 | 27.571 |
| 12/28/2010 12:44:01 | 33.118 | 12/26/2010 19:19:01 | 27.571 |
| 12/28/2010 13:04:01 | 34.551 | 12/26/2010 19:39:01 | 27.634 |
| 12/28/2010 13:24:01 | 35.673 | 12/26/2010 19:59:01 | 27.634 |
| 12/28/2010 13:44:01 | 33.679 | 12/26/2010 20:19:01 | 27.634 |
| 12/28/2010 14:04:01 | 33.741 | 12/26/2010 20:39:01 | 27.634 |
| 12/28/2010 14:24:01 | 35.486 | 12/26/2010 20:59:01 | 27.696 |
| 12/28/2010 14:44:01 | 36.358 | 12/26/2010 21:19:01 | 27.696 |
| 12/28/2010 15:04:01 | 34.551 | 12/26/2010 21:39:01 | 27.696 |
| 12/28/2010 15:24:01 | 33.429 | 12/26/2010 21:59:01 | 27.696 |
| 12/28/2010 15:44:01 | 32.806 | 12/26/2010 22:19:01 | 27.696 |
| 12/28/2010 16:04:01 | 32.307 | 12/26/2010 22:39:01 | 27.696 |
| 12/28/2010 16:24:01 | 31.746 | 12/26/2010 22:59:01 | 27.696 |
| 12/28/2010 16:44:01 | 30.747 | 12/26/2010 23:19:01 | 27.696 |
| 12/28/2010 17:04:01 | 29.999 | 12/26/2010 23:39:01 | 27.696 |
| 12/28/2010 17:24:01 | 29.374 | 12/26/2010 23:59:01 | 27.634 |
| 12/28/2010 17:44:01 | 28.688 | 12/27/2010 00:19:01 | 27.634 |
| 12/28/2010 18:04:01 | 28.188 | 12/27/2010 00:39:01 | 27.634 |
| 12/28/2010 18:24:01 | 28.313 | 12/27/2010 00:59:01 | 27.634 |
| 12/28/2010 18:44:01 | 28.251 | 12/27/2010 01:19:01 | 27.634 |
| 12/28/2010 19:04:01 | 27.751 | 12/27/2010 01:39:01 | 27.634 |
| 12/28/2010 19:24:01 | 27.314 | 12/27/2010 01:59:01 | 27.634 |
| 12/28/2010 19:44:01 | 27.189 | 12/27/2010 02:19:01 | 27.571 |
| 12/28/2010 20:04:01 | 26.752 | 12/27/2010 02:39:01 | 27.571 |
| 12/28/2010 20:24:01 | 26.564 | 12/27/2010 02:59:01 | 27.571 |
| 12/28/2010 20:44:01 | 26.939 | 12/27/2010 03:19:01 | 27.571 |
| 12/28/2010 21:04:01 | 26.877 | 12/27/2010 03:39:01 | 27.509 |
| 12/28/2010 21:24:01 | 26.564 | 12/27/2010 03:59:01 | 27.509 |
| 12/28/2010 21:44:01 | 25.502 | 12/27/2010 04:19:01 | 27.509 |
| 12/28/2010 22:04:01 | 24.877 | 12/27/2010 04:39:01 | 27.509 |
| 12/28/2010 22:24:01 | 24.627 | 12/27/2010 04:59:01 | 27.509 |
| 12/28/2010 22:44:01 | 24.627 | 12/27/2010 05:19:01 | 27.446 |

|                     |        |                     |        |
|---------------------|--------|---------------------|--------|
| 12/28/2010 23:04:01 | 22.876 | 12/27/2010 05:39:01 | 27.446 |
| 12/28/2010 23:24:01 | 22.125 | 12/27/2010 05:59:01 | 27.446 |
| 12/28/2010 23:44:01 | 21.813 | 12/27/2010 06:19:01 | 27.446 |
| 12/29/2010 00:04:01 | 21.813 | 12/27/2010 06:39:01 | 27.384 |
| 12/29/2010 00:24:01 | 21.750 | 12/27/2010 06:59:01 | 27.384 |
| 12/29/2010 00:44:01 | 22.376 | 12/27/2010 07:19:01 | 27.384 |
| 12/29/2010 01:04:01 | 22.626 | 12/27/2010 07:39:01 | 27.384 |
| 12/29/2010 01:24:01 | 22.626 | 12/27/2010 07:59:01 | 27.321 |
| 12/29/2010 01:44:01 | 22.626 | 12/27/2010 08:19:01 | 27.321 |
| 12/29/2010 02:04:01 | 22.688 | 12/27/2010 08:39:01 | 27.321 |
| 12/29/2010 02:24:01 | 22.688 | 12/27/2010 08:59:01 | 27.321 |
| 12/29/2010 02:44:01 | 22.626 | 12/27/2010 09:19:01 | 27.321 |
| 12/29/2010 03:04:01 | 22.688 | 12/27/2010 09:39:01 | 27.321 |
| 12/29/2010 03:24:01 | 22.688 | 12/27/2010 09:59:01 | 27.259 |
| 12/29/2010 03:44:01 | 22.563 | 12/27/2010 10:19:01 | 27.259 |
| 12/29/2010 04:04:01 | 22.626 | 12/27/2010 10:39:01 | 27.259 |
| 12/29/2010 04:24:01 | 22.563 | 12/27/2010 10:59:01 | 27.259 |
| 12/29/2010 04:44:01 | 22.688 | 12/27/2010 11:19:01 | 27.259 |
| 12/29/2010 05:04:01 | 22.563 | 12/27/2010 11:39:01 | 27.259 |
| 12/29/2010 05:24:01 | 22.501 | 12/27/2010 11:59:01 | 27.259 |
| 12/29/2010 05:44:01 | 22.751 | 12/27/2010 12:19:01 | 27.259 |
| 12/29/2010 06:04:01 | 22.939 | 12/27/2010 12:39:01 | 27.259 |
| 12/29/2010 06:24:01 | 23.501 | 12/27/2010 12:59:01 | 27.259 |
| 12/29/2010 06:44:01 | 24.064 | 12/27/2010 13:19:01 | 27.259 |
| 12/29/2010 07:04:01 | 24.627 | 12/27/2010 13:39:01 | 27.321 |
| 12/29/2010 07:24:01 | 24.939 | 12/27/2010 13:59:01 | 27.321 |
| 12/29/2010 07:44:01 | 26.752 | 12/27/2010 14:19:01 | 27.321 |
| 12/29/2010 08:04:01 | 27.751 | 12/27/2010 14:39:01 | 27.321 |
| 12/29/2010 08:24:01 | 27.564 | 12/27/2010 14:59:01 | 27.321 |
| 12/29/2010 08:44:01 | 27.938 | 12/27/2010 15:19:01 | 27.384 |
| 12/29/2010 09:04:01 | 28.126 | 12/27/2010 15:39:01 | 27.384 |
| 12/29/2010 09:24:01 | 29.562 | 12/27/2010 15:59:01 | 27.384 |
| 12/29/2010 09:44:01 | 30.872 | 12/27/2010 16:19:01 | 27.446 |
| 12/29/2010 10:04:01 | 30.498 | 12/27/2010 16:39:01 | 27.446 |
| 12/29/2010 10:24:01 | 32.120 | 12/27/2010 16:59:01 | 27.446 |
| 12/29/2010 10:44:01 | 32.993 | 12/27/2010 17:19:01 | 27.509 |
| 12/29/2010 11:04:01 | 32.868 | 12/27/2010 17:39:01 | 27.509 |
| 12/29/2010 11:24:01 | 32.931 | 12/27/2010 17:59:01 | 27.509 |
| 12/29/2010 11:44:01 | 31.995 | 12/27/2010 18:19:01 | 27.571 |
| 12/29/2010 12:04:01 | 32.806 | 12/27/2010 18:39:01 | 27.571 |
| 12/29/2010 12:24:01 | 33.242 | 12/27/2010 18:59:01 | 27.571 |
| 12/29/2010 12:44:01 | 34.925 | 12/27/2010 19:19:01 | 27.571 |
| 12/29/2010 13:04:01 | 36.171 | 12/27/2010 19:39:01 | 27.634 |
| 12/29/2010 13:24:01 | 36.296 | 12/27/2010 19:59:01 | 27.634 |
| 12/29/2010 13:44:01 | 37.168 | 12/27/2010 20:19:01 | 27.634 |
| 12/29/2010 14:04:01 | 35.673 | 12/27/2010 20:39:01 | 27.634 |
| 12/29/2010 14:24:01 | 36.732 | 12/27/2010 20:59:01 | 27.634 |
| 12/29/2010 14:44:01 | 36.171 | 12/27/2010 21:19:01 | 27.634 |
| 12/29/2010 15:04:01 | 34.925 | 12/27/2010 21:39:01 | 27.634 |
| 12/29/2010 15:24:01 | 33.429 | 12/27/2010 21:59:01 | 27.634 |

|                     |        |                     |        |
|---------------------|--------|---------------------|--------|
| 12/29/2010 15:44:01 | 31.621 | 12/27/2010 22:19:01 | 27.634 |
| 12/29/2010 16:04:01 | 30.373 | 12/27/2010 22:39:01 | 27.634 |
| 12/29/2010 16:24:01 | 30.747 | 12/27/2010 22:59:01 | 27.634 |
| 12/29/2010 16:44:01 | 31.247 | 12/27/2010 23:19:01 | 27.634 |
| 12/29/2010 17:04:01 | 31.059 | 12/27/2010 23:39:01 | 27.634 |
| 12/29/2010 17:24:01 | 30.872 | 12/27/2010 23:59:01 | 27.634 |
| 12/29/2010 17:44:01 | 30.311 | 12/28/2010 00:19:01 | 27.634 |
| 12/29/2010 18:04:01 | 29.562 | 12/28/2010 00:39:01 | 27.634 |
| 12/29/2010 18:24:01 | 28.937 | 12/28/2010 00:59:01 | 27.634 |
| 12/29/2010 18:44:01 | 28.126 | 12/28/2010 01:19:01 | 27.634 |
| 12/29/2010 19:04:01 | 27.876 | 12/28/2010 01:39:01 | 27.571 |
| 12/29/2010 19:24:01 | 27.501 | 12/28/2010 01:59:01 | 27.571 |
| 12/29/2010 19:44:01 | 27.002 | 12/28/2010 02:19:01 | 27.509 |
| 12/29/2010 20:04:01 | 26.439 | 12/28/2010 02:39:01 | 27.509 |
| 12/29/2010 20:24:01 | 25.752 | 12/28/2010 02:59:01 | 27.446 |
| 12/29/2010 20:44:01 | 25.377 | 12/28/2010 03:19:01 | 27.384 |
| 12/29/2010 21:04:01 | 25.189 | 12/28/2010 03:39:01 | 27.384 |
| 12/29/2010 21:24:01 | 24.877 | 12/28/2010 03:59:01 | 27.321 |
| 12/29/2010 21:44:01 | 24.502 | 12/28/2010 04:19:01 | 27.259 |
| 12/29/2010 22:04:01 | 24.252 | 12/28/2010 04:39:01 | 27.259 |
| 12/29/2010 22:24:01 | 24.002 | 12/28/2010 04:59:01 | 27.197 |
| 12/29/2010 22:44:01 | 23.877 | 12/28/2010 05:19:01 | 27.197 |
| 12/29/2010 23:04:01 | 23.939 | 12/28/2010 05:39:01 | 27.134 |
| 12/29/2010 23:24:01 | 23.814 | 12/28/2010 05:59:01 | 27.134 |
| 12/29/2010 23:44:01 | 23.689 | 12/28/2010 06:19:01 | 27.134 |
| 12/30/2010 00:04:01 | 23.564 | 12/28/2010 06:39:01 | 27.072 |
| 12/30/2010 00:24:01 | 24.127 | 12/28/2010 06:59:01 | 27.072 |
| 12/30/2010 00:44:01 | 24.252 | 12/28/2010 07:19:01 | 27.009 |
| 12/30/2010 01:04:01 | 23.564 | 12/28/2010 07:39:01 | 27.009 |
| 12/30/2010 01:24:01 | 23.251 | 12/28/2010 07:59:01 | 27.009 |
| 12/30/2010 01:44:01 | 23.126 | 12/28/2010 08:19:01 | 27.009 |
| 12/30/2010 02:04:01 | 22.939 | 12/28/2010 08:39:01 | 26.947 |
| 12/30/2010 02:24:01 | 22.688 | 12/28/2010 08:59:01 | 26.947 |
| 12/30/2010 02:44:01 | 22.438 | 12/28/2010 09:19:01 | 26.947 |
| 12/30/2010 03:04:01 | 22.501 | 12/28/2010 09:39:01 | 26.947 |
| 12/30/2010 03:24:01 | 22.626 | 12/28/2010 09:59:01 | 26.884 |
| 12/30/2010 03:44:01 | 22.876 | 12/28/2010 10:19:01 | 26.884 |
| 12/30/2010 04:04:01 | 23.001 | 12/28/2010 10:39:01 | 26.884 |
| 12/30/2010 04:24:01 | 22.626 | 12/28/2010 10:59:01 | 26.884 |
| 12/30/2010 04:44:01 | 22.626 | 12/28/2010 11:19:01 | 26.884 |
| 12/30/2010 05:04:01 | 22.814 | 12/28/2010 11:39:01 | 26.884 |
| 12/30/2010 05:24:01 | 23.001 | 12/28/2010 11:59:01 | 26.884 |
| 12/30/2010 05:44:01 | 23.064 | 12/28/2010 12:19:01 | 26.884 |
| 12/30/2010 06:04:01 | 23.126 | 12/28/2010 12:39:01 | 26.884 |
| 12/30/2010 06:24:01 | 23.251 | 12/28/2010 12:59:01 | 26.884 |
| 12/30/2010 06:44:01 | 23.439 | 12/28/2010 13:19:01 | 26.884 |
| 12/30/2010 07:04:01 | 23.689 | 12/28/2010 13:39:01 | 26.947 |
| 12/30/2010 07:24:01 | 24.002 | 12/28/2010 13:59:01 | 26.947 |
| 12/30/2010 07:44:01 | 24.314 | 12/28/2010 14:19:01 | 26.947 |
| 12/30/2010 08:04:01 | 25.564 | 12/28/2010 14:39:01 | 27.009 |

|                     |        |                     |        |
|---------------------|--------|---------------------|--------|
| 12/30/2010 08:24:01 | 25.127 | 12/28/2010 14:59:01 | 27.009 |
| 12/30/2010 08:44:01 | 25.689 | 12/28/2010 15:19:01 | 27.009 |
| 12/30/2010 09:04:01 | 26.064 | 12/28/2010 15:39:01 | 27.072 |
| 12/30/2010 09:24:01 | 26.939 | 12/28/2010 15:59:01 | 27.072 |
| 12/30/2010 09:44:01 | 28.313 | 12/28/2010 16:19:01 | 27.134 |
| 12/30/2010 10:04:01 | 29.437 | 12/28/2010 16:39:01 | 27.134 |
| 12/30/2010 10:24:01 | 30.061 | 12/28/2010 16:59:01 | 27.197 |
| 12/30/2010 10:44:01 | 30.623 | 12/28/2010 17:19:01 | 27.197 |
| 12/30/2010 11:04:01 | 31.995 | 12/28/2010 17:39:01 | 27.197 |
| 12/30/2010 11:24:01 | 32.556 | 12/28/2010 17:59:01 | 27.259 |
| 12/30/2010 11:44:01 | 33.367 | 12/28/2010 18:19:01 | 27.321 |
| 12/30/2010 12:04:01 | 34.427 | 12/28/2010 18:39:01 | 27.321 |
| 12/30/2010 12:24:01 | 34.676 | 12/28/2010 18:59:01 | 27.321 |
| 12/30/2010 12:44:01 | 35.050 | 12/28/2010 19:19:01 | 27.384 |
| 12/30/2010 13:04:01 | 35.361 | 12/28/2010 19:39:01 | 27.384 |
| 12/30/2010 13:24:01 | 35.798 | 12/28/2010 19:59:01 | 27.384 |
| 12/30/2010 13:44:01 | 36.296 | 12/28/2010 20:19:01 | 27.446 |
| 12/30/2010 14:04:01 | 36.171 | 12/28/2010 20:39:01 | 27.446 |
| 12/30/2010 14:24:01 | 36.607 | 12/28/2010 20:59:01 | 27.446 |
| 12/30/2010 14:44:01 | 36.421 | 12/28/2010 21:19:01 | 27.446 |
| 12/30/2010 15:04:01 | 35.299 | 12/28/2010 21:39:01 | 27.446 |
| 12/30/2010 15:24:01 | 33.990 | 12/28/2010 21:59:01 | 27.446 |
| 12/30/2010 15:44:01 | 33.242 | 12/28/2010 22:19:01 | 27.446 |
| 12/30/2010 16:04:01 | 32.245 | 12/28/2010 22:39:01 | 27.446 |
| 12/30/2010 16:24:01 | 31.933 | 12/28/2010 22:59:01 | 27.446 |
| 12/30/2010 16:44:01 | 30.810 | 12/28/2010 23:19:01 | 27.509 |
| 12/30/2010 17:04:01 | 30.747 | 12/28/2010 23:39:01 | 27.446 |
| 12/30/2010 17:24:01 | 30.311 | 12/28/2010 23:59:01 | 27.446 |
| 12/30/2010 17:44:01 | 29.312 | 12/29/2010 00:19:01 | 27.446 |
| 12/30/2010 18:04:01 | 28.126 | 12/29/2010 00:39:01 | 27.446 |
| 12/30/2010 18:24:01 | 27.064 | 12/29/2010 00:59:01 | 27.446 |
| 12/30/2010 18:44:01 | 26.127 | 12/29/2010 01:19:01 | 27.446 |
| 12/30/2010 19:04:01 | 25.377 | 12/29/2010 01:39:01 | 27.446 |
| 12/30/2010 19:24:01 | 24.939 | 12/29/2010 01:59:01 | 27.446 |
| 12/30/2010 19:44:01 | 24.502 | 12/29/2010 02:19:01 | 27.446 |
| 12/30/2010 20:04:01 | 24.252 | 12/29/2010 02:39:01 | 27.384 |
| 12/30/2010 20:24:01 | 24.002 | 12/29/2010 02:59:01 | 27.384 |
| 12/30/2010 20:44:01 | 23.814 | 12/29/2010 03:19:01 | 27.384 |
| 12/30/2010 21:04:01 | 23.752 | 12/29/2010 03:39:01 | 27.384 |
| 12/30/2010 21:24:01 | 23.814 | 12/29/2010 03:59:01 | 27.384 |
| 12/30/2010 21:44:01 | 23.877 | 12/29/2010 04:19:01 | 27.321 |
| 12/30/2010 22:04:01 | 23.689 | 12/29/2010 04:39:01 | 27.321 |
| 12/30/2010 22:24:01 | 23.689 | 12/29/2010 04:59:01 | 27.321 |
| 12/30/2010 22:44:01 | 23.564 | 12/29/2010 05:19:01 | 27.321 |
| 12/30/2010 23:04:01 | 23.439 | 12/29/2010 05:39:01 | 27.259 |
| 12/30/2010 23:24:01 | 23.251 | 12/29/2010 05:59:01 | 27.259 |
| 12/30/2010 23:44:01 | 23.126 | 12/29/2010 06:19:01 | 27.259 |
| 12/31/2010 00:04:01 | 23.126 | 12/29/2010 06:39:01 | 27.259 |
| 12/31/2010 00:24:01 | 23.126 | 12/29/2010 06:59:01 | 27.197 |
| 12/31/2010 00:44:01 | 23.126 | 12/29/2010 07:19:01 | 27.197 |

|                     |        |                     |        |
|---------------------|--------|---------------------|--------|
| 12/31/2010 01:04:01 | 23.376 | 12/29/2010 07:39:01 | 27.197 |
| 12/31/2010 01:24:01 | 23.439 | 12/29/2010 07:59:01 | 27.197 |
| 12/31/2010 01:44:01 | 23.627 | 12/29/2010 08:19:01 | 27.134 |
| 12/31/2010 02:04:01 | 23.689 | 12/29/2010 08:39:01 | 27.134 |
| 12/31/2010 02:24:01 | 23.814 | 12/29/2010 08:59:01 | 27.134 |
| 12/31/2010 02:44:01 | 23.689 | 12/29/2010 09:19:01 | 27.134 |
| 12/31/2010 03:04:01 | 23.564 | 12/29/2010 09:39:01 | 27.134 |
| 12/31/2010 03:24:01 | 23.439 | 12/29/2010 09:59:01 | 27.134 |
| 12/31/2010 03:44:01 | 23.251 | 12/29/2010 10:19:01 | 27.072 |
| 12/31/2010 04:04:01 | 22.939 | 12/29/2010 10:39:01 | 27.072 |
| 12/31/2010 04:24:01 | 22.626 | 12/29/2010 10:59:01 | 27.072 |
| 12/31/2010 04:44:01 | 22.438 | 12/29/2010 11:19:01 | 27.072 |
| 12/31/2010 05:04:01 | 22.313 | 12/29/2010 11:39:01 | 27.072 |
| 12/31/2010 05:24:01 | 22.188 | 12/29/2010 11:59:01 | 27.072 |
| 12/31/2010 05:44:01 | 22.188 | 12/29/2010 12:19:01 | 27.072 |
| 12/31/2010 06:04:01 | 22.563 | 12/29/2010 12:39:01 | 27.072 |
| 12/31/2010 06:24:01 | 23.376 | 12/29/2010 12:59:01 | 27.072 |
| 12/31/2010 06:44:01 | 24.127 | 12/29/2010 13:19:01 | 27.134 |
| 12/31/2010 07:04:01 | 24.689 | 12/29/2010 13:39:01 | 27.134 |
| 12/31/2010 07:24:01 | 25.377 | 12/29/2010 13:59:01 | 27.134 |
| 12/31/2010 07:44:01 | 25.939 | 12/29/2010 14:19:01 | 27.134 |
| 12/31/2010 08:04:01 | 26.814 | 12/29/2010 14:39:01 | 27.134 |
| 12/31/2010 08:24:01 | 27.626 | 12/29/2010 14:59:01 | 27.197 |
| 12/31/2010 08:44:01 | 28.126 | 12/29/2010 15:19:01 | 27.197 |
| 12/31/2010 09:04:01 | 29.000 | 12/29/2010 15:39:01 | 27.197 |
| 12/31/2010 09:24:01 | 30.186 | 12/29/2010 15:59:01 | 27.197 |
| 12/31/2010 09:44:01 | 32.182 | 12/29/2010 16:19:01 | 27.259 |
| 12/31/2010 10:04:01 | 33.118 | 12/29/2010 16:39:01 | 27.259 |
| 12/31/2010 10:24:01 | 33.616 | 12/29/2010 16:59:01 | 27.321 |
| 12/31/2010 10:44:01 | 33.803 | 12/29/2010 17:19:01 | 27.321 |
| 12/31/2010 11:04:01 | 34.489 | 12/29/2010 17:39:01 | 27.384 |
| 12/31/2010 11:24:01 | 35.175 | 12/29/2010 17:59:01 | 27.384 |
| 12/31/2010 11:44:01 | 35.548 | 12/29/2010 18:19:01 | 27.384 |
| 12/31/2010 12:04:01 | 36.296 | 12/29/2010 18:39:01 | 27.446 |
| 12/31/2010 12:24:01 | 36.794 | 12/29/2010 18:59:01 | 27.446 |
| 12/31/2010 12:44:01 | 37.106 | 12/29/2010 19:19:01 | 27.446 |
| 12/31/2010 13:04:01 | 37.168 | 12/29/2010 19:39:01 | 27.446 |
| 12/31/2010 13:24:01 | 37.230 | 12/29/2010 19:59:01 | 27.509 |
| 12/31/2010 13:44:01 | 37.977 | 12/29/2010 20:19:01 | 27.509 |
| 12/31/2010 14:04:01 | 37.977 | 12/29/2010 20:39:01 | 27.509 |
| 12/31/2010 14:24:01 | 37.915 | 12/29/2010 20:59:01 | 27.509 |
| 12/31/2010 14:44:01 | 37.977 | 12/29/2010 21:19:01 | 27.509 |
| 12/31/2010 15:04:01 | 36.732 | 12/29/2010 21:39:01 | 27.509 |
| 12/31/2010 15:24:01 | 35.424 | 12/29/2010 21:59:01 | 27.509 |
| 12/31/2010 15:44:01 | 34.551 | 12/29/2010 22:19:01 | 27.509 |
| 12/31/2010 16:04:01 | 33.866 | 12/29/2010 22:39:01 | 27.509 |
| 12/31/2010 16:24:01 | 33.118 | 12/29/2010 22:59:01 | 27.509 |
| 12/31/2010 16:44:01 | 32.369 | 12/29/2010 23:19:01 | 27.509 |
| 12/31/2010 17:04:01 | 31.122 | 12/29/2010 23:39:01 | 27.509 |
| 12/31/2010 17:24:01 | 30.123 | 12/29/2010 23:59:01 | 27.509 |

|                     |        |                     |        |
|---------------------|--------|---------------------|--------|
| 12/31/2010 17:44:01 | 29.187 | 12/30/2010 00:19:01 | 27.509 |
| 12/31/2010 18:04:01 | 28.126 | 12/30/2010 00:39:01 | 27.509 |
| 12/31/2010 18:24:01 | 27.439 | 12/30/2010 00:59:01 | 27.509 |
| 12/31/2010 18:44:01 | 27.876 | 12/30/2010 01:19:01 | 27.509 |
| 12/31/2010 19:04:01 | 28.001 | 12/30/2010 01:39:01 | 27.446 |
| 12/31/2010 19:24:01 | 27.626 | 12/30/2010 01:59:01 | 27.446 |
| 12/31/2010 19:44:01 | 27.064 | 12/30/2010 02:19:01 | 27.446 |
| 12/31/2010 20:04:01 | 26.502 | 12/30/2010 02:39:01 | 27.446 |
| 12/31/2010 20:24:01 | 25.627 | 12/30/2010 02:59:01 | 27.446 |
| 12/31/2010 20:44:01 | 25.002 | 12/30/2010 03:19:01 | 27.446 |
| 12/31/2010 21:04:01 | 24.564 | 12/30/2010 03:39:01 | 27.384 |
| 12/31/2010 21:24:01 | 24.252 | 12/30/2010 03:59:01 | 27.384 |
| 12/31/2010 21:44:01 | 24.002 | 12/30/2010 04:19:01 | 27.384 |
| 12/31/2010 22:04:01 | 23.752 | 12/30/2010 04:39:01 | 27.384 |
| 12/31/2010 22:24:01 | 23.501 | 12/30/2010 04:59:01 | 27.384 |
| 12/31/2010 22:44:01 | 23.314 | 12/30/2010 05:19:01 | 27.321 |
| 12/31/2010 23:04:01 | 23.126 | 12/30/2010 05:39:01 | 27.321 |
| 12/31/2010 23:24:01 | 23.001 | 12/30/2010 05:59:01 | 27.321 |
| 12/31/2010 23:44:01 | 23.064 | 12/30/2010 06:19:01 | 27.321 |
| 1/1/2011 00:04:01   | 23.189 | 12/30/2010 06:39:01 | 27.259 |
| 1/1/2011 00:24:01   | 23.314 | 12/30/2010 06:59:01 | 27.259 |
| 1/1/2011 00:44:01   | 23.314 | 12/30/2010 07:19:01 | 27.259 |
| 1/1/2011 01:04:01   | 23.376 | 12/30/2010 07:39:01 | 27.259 |
| 1/1/2011 01:24:01   | 23.251 | 12/30/2010 07:59:01 | 27.197 |
| 1/1/2011 01:44:01   | 23.251 | 12/30/2010 08:19:01 | 27.197 |
| 1/1/2011 02:04:01   | 23.376 | 12/30/2010 08:39:01 | 27.197 |
| 1/1/2011 02:24:01   | 23.064 | 12/30/2010 08:59:01 | 27.197 |
| 1/1/2011 02:44:01   | 22.939 | 12/30/2010 09:19:01 | 27.134 |
| 1/1/2011 03:04:01   | 22.876 | 12/30/2010 09:39:01 | 27.134 |
| 1/1/2011 03:24:01   | 23.001 | 12/30/2010 09:59:01 | 27.134 |
| 1/1/2011 03:44:01   | 22.939 | 12/30/2010 10:19:01 | 27.134 |
| 1/1/2011 04:04:01   | 22.939 | 12/30/2010 10:39:01 | 27.134 |
| 1/1/2011 04:24:01   | 22.876 | 12/30/2010 10:59:01 | 27.072 |
| 1/1/2011 04:44:01   | 22.688 | 12/30/2010 11:19:01 | 27.134 |
| 1/1/2011 05:04:01   | 22.438 | 12/30/2010 11:39:01 | 27.072 |
| 1/1/2011 05:24:01   | 22.313 | 12/30/2010 11:59:01 | 27.072 |
| 1/1/2011 05:44:01   | 22.563 | 12/30/2010 12:19:01 | 27.072 |
| 1/1/2011 06:04:01   | 23.064 | 12/30/2010 12:39:01 | 27.072 |
| 1/1/2011 06:24:01   | 23.439 | 12/30/2010 12:59:01 | 27.134 |
| 1/1/2011 06:44:01   | 24.127 | 12/30/2010 13:19:01 | 27.134 |
| 1/1/2011 07:04:01   | 25.064 | 12/30/2010 13:39:01 | 27.134 |
| 1/1/2011 07:24:01   | 26.377 | 12/30/2010 13:59:01 | 27.134 |
| 1/1/2011 07:44:01   | 27.626 | 12/30/2010 14:19:01 | 27.134 |
| 1/1/2011 08:04:01   | 29.437 | 12/30/2010 14:39:01 | 27.197 |
| 1/1/2011 08:24:01   | 28.063 | 12/30/2010 14:59:01 | 27.197 |
| 1/1/2011 08:44:01   | 28.625 | 12/30/2010 15:19:01 | 27.197 |
| 1/1/2011 09:04:01   | 29.874 | 12/30/2010 15:39:01 | 27.259 |
| 1/1/2011 09:24:01   | 30.623 | 12/30/2010 15:59:01 | 27.259 |
| 1/1/2011 09:44:01   | 32.307 | 12/30/2010 16:19:01 | 27.321 |
| 1/1/2011 10:04:01   | 32.494 | 12/30/2010 16:39:01 | 27.321 |



|                   |        |                     |        |
|-------------------|--------|---------------------|--------|
| 1/1/2011 10:24:01 | 33.554 | 12/30/2010 16:59:01 | 27.384 |
| 1/1/2011 10:44:01 | 32.868 | 12/30/2010 17:19:01 | 27.384 |
| 1/1/2011 11:04:01 | 34.364 | 12/30/2010 17:39:01 | 27.384 |
| 1/1/2011 11:24:01 | 35.175 | 12/30/2010 17:59:01 | 27.446 |
| 1/1/2011 11:44:01 | 36.234 | 12/30/2010 18:19:01 | 27.509 |
| 1/1/2011 12:04:01 | 36.794 | 12/30/2010 18:39:01 | 27.509 |
| 1/1/2011 12:24:01 | 37.292 | 12/30/2010 18:59:01 | 27.509 |
| 1/1/2011 12:44:01 | 37.541 | 12/30/2010 19:19:01 | 27.571 |
| 1/1/2011 13:04:01 | 37.479 | 12/30/2010 19:39:01 | 27.571 |
| 1/1/2011 13:24:01 | 37.728 | 12/30/2010 19:59:01 | 27.571 |
| 1/1/2011 13:44:01 | 38.226 | 12/30/2010 20:19:01 | 27.571 |
| 1/1/2011 14:04:01 | 37.541 | 12/30/2010 20:39:01 | 27.634 |
| 1/1/2011 14:24:01 | 38.102 | 12/30/2010 20:59:01 | 27.634 |
| 1/1/2011 14:44:01 | 38.164 | 12/30/2010 21:19:01 | 27.634 |
| 1/1/2011 15:04:01 | 37.292 | 12/30/2010 21:39:01 | 27.634 |
| 1/1/2011 15:24:01 | 35.922 | 12/30/2010 21:59:01 | 27.634 |
| 1/1/2011 15:44:01 | 34.925 | 12/30/2010 22:19:01 | 27.634 |
| 1/1/2011 16:04:01 | 34.115 | 12/30/2010 22:39:01 | 27.634 |
| 1/1/2011 16:24:01 | 33.492 | 12/30/2010 22:59:01 | 27.634 |
| 1/1/2011 16:44:01 | 32.743 | 12/30/2010 23:19:01 | 27.571 |
| 1/1/2011 17:04:01 | 31.746 | 12/30/2010 23:39:01 | 27.571 |
| 1/1/2011 17:24:01 | 30.935 | 12/30/2010 23:59:01 | 27.571 |
| 1/1/2011 17:44:01 | 29.999 | 12/31/2010 00:19:01 | 27.571 |
| 1/1/2011 18:04:01 | 29.000 | 12/31/2010 00:39:01 | 27.571 |
| 1/1/2011 18:24:01 | 28.438 | 12/31/2010 00:59:01 | 27.571 |
| 1/1/2011 18:44:01 | 28.688 | 12/31/2010 01:19:01 | 27.571 |
| 1/1/2011 19:04:01 | 28.937 | 12/31/2010 01:39:01 | 27.509 |
| 1/1/2011 19:24:01 | 28.750 | 12/31/2010 01:59:01 | 27.509 |
| 1/1/2011 19:44:01 | 28.500 | 12/31/2010 02:19:01 | 27.509 |
| 1/1/2011 20:04:01 | 28.001 | 12/31/2010 02:39:01 | 27.509 |
| 1/1/2011 20:24:01 | 27.564 | 12/31/2010 02:59:01 | 27.446 |
| 1/1/2011 20:44:01 | 27.439 | 12/31/2010 03:19:01 | 27.446 |
| 1/1/2011 21:04:01 | 27.064 | 12/31/2010 03:39:01 | 27.446 |
| 1/1/2011 21:24:01 | 26.439 | 12/31/2010 03:59:01 | 27.446 |
| 1/1/2011 21:44:01 | 26.002 | 12/31/2010 04:19:01 | 27.446 |
| 1/1/2011 22:04:01 | 25.439 | 12/31/2010 04:39:01 | 27.384 |
| 1/1/2011 22:24:01 | 25.127 | 12/31/2010 04:59:01 | 27.384 |
| 1/1/2011 22:44:01 | 24.752 | 12/31/2010 05:19:01 | 27.384 |
| 1/1/2011 23:04:01 | 24.502 | 12/31/2010 05:39:01 | 27.384 |
| 1/1/2011 23:24:01 | 24.439 | 12/31/2010 05:59:01 | 27.321 |
| 1/1/2011 23:44:01 | 24.252 | 12/31/2010 06:19:01 | 27.321 |
| 1/2/2011 00:04:01 | 24.502 | 12/31/2010 06:39:01 | 27.321 |
| 1/2/2011 00:24:01 | 24.627 | 12/31/2010 06:59:01 | 27.321 |
| 1/2/2011 00:44:01 | 24.752 | 12/31/2010 07:19:01 | 27.321 |
| 1/2/2011 01:04:01 | 24.689 | 12/31/2010 07:39:01 | 27.259 |
| 1/2/2011 01:24:01 | 24.689 | 12/31/2010 07:59:01 | 27.259 |
| 1/2/2011 01:44:01 | 24.939 | 12/31/2010 08:19:01 | 27.259 |
| 1/2/2011 02:04:01 | 24.877 | 12/31/2010 08:39:01 | 27.259 |
| 1/2/2011 02:24:01 | 24.877 | 12/31/2010 08:59:01 | 27.259 |
| 1/2/2011 02:44:01 | 25.002 | 12/31/2010 09:19:01 | 27.197 |

|                   |        |                     |        |
|-------------------|--------|---------------------|--------|
| 1/2/2011 03:04:01 | 25.064 | 12/31/2010 09:39:01 | 27.197 |
| 1/2/2011 03:24:01 | 25.064 | 12/31/2010 09:59:01 | 27.197 |
| 1/2/2011 03:44:01 | 24.877 | 12/31/2010 10:19:01 | 27.197 |
| 1/2/2011 04:04:01 | 24.377 | 12/31/2010 10:39:01 | 27.197 |
| 1/2/2011 04:24:01 | 24.127 | 12/31/2010 10:59:01 | 27.197 |
| 1/2/2011 04:44:01 | 23.814 | 12/31/2010 11:19:01 | 27.197 |
| 1/2/2011 05:04:01 | 23.752 | 12/31/2010 11:39:01 | 27.197 |
| 1/2/2011 05:24:01 | 23.564 | 12/31/2010 11:59:01 | 27.134 |
| 1/2/2011 05:44:01 | 23.376 | 12/31/2010 12:19:01 | 27.197 |
| 1/2/2011 06:04:01 | 23.689 | 12/31/2010 12:39:01 | 27.197 |
| 1/2/2011 06:24:01 | 24.752 | 12/31/2010 12:59:01 | 27.197 |
| 1/2/2011 06:44:01 | 25.189 | 12/31/2010 13:19:01 | 27.197 |
| 1/2/2011 07:04:01 | 25.939 | 12/31/2010 13:39:01 | 27.197 |
| 1/2/2011 07:24:01 | 26.502 | 12/31/2010 13:59:01 | 27.197 |
| 1/2/2011 07:44:01 | 27.251 | 12/31/2010 14:19:01 | 27.197 |
| 1/2/2011 08:04:01 | 29.562 | 12/31/2010 14:39:01 | 27.259 |
| 1/2/2011 08:24:01 | 29.624 | 12/31/2010 14:59:01 | 27.259 |
| 1/2/2011 08:44:01 | 29.999 | 12/31/2010 15:19:01 | 27.259 |
| 1/2/2011 09:04:01 | 30.248 | 12/31/2010 15:39:01 | 27.321 |
| 1/2/2011 09:24:01 | 31.122 | 12/31/2010 15:59:01 | 27.321 |
| 1/2/2011 09:44:01 | 32.494 | 12/31/2010 16:19:01 | 27.321 |
| 1/2/2011 10:04:01 | 33.305 | 12/31/2010 16:39:01 | 27.384 |
| 1/2/2011 10:24:01 | 33.429 | 12/31/2010 16:59:01 | 27.384 |
| 1/2/2011 10:44:01 | 33.803 | 12/31/2010 17:19:01 | 27.446 |
| 1/2/2011 11:04:01 | 34.614 | 12/31/2010 17:39:01 | 27.446 |
| 1/2/2011 11:24:01 | 34.115 | 12/31/2010 17:59:01 | 27.509 |
| 1/2/2011 11:44:01 | 35.237 | 12/31/2010 18:19:01 | 27.509 |
| 1/2/2011 12:04:01 | 36.171 | 12/31/2010 18:39:01 | 27.571 |
| 1/2/2011 12:24:01 | 36.296 | 12/31/2010 18:59:01 | 27.571 |
| 1/2/2011 12:44:01 | 36.981 | 12/31/2010 19:19:01 | 27.571 |
| 1/2/2011 13:04:01 | 37.479 | 12/31/2010 19:39:01 | 27.571 |
| 1/2/2011 13:24:01 | 37.292 | 12/31/2010 19:59:01 | 27.634 |
| 1/2/2011 13:44:01 | 36.545 | 12/31/2010 20:19:01 | 27.634 |
| 1/2/2011 14:04:01 | 36.794 | 12/31/2010 20:39:01 | 27.634 |
| 1/2/2011 14:24:01 | 36.981 | 12/31/2010 20:59:01 | 27.634 |
| 1/2/2011 14:44:01 | 36.234 | 12/31/2010 21:19:01 | 27.634 |
| 1/2/2011 15:04:01 | 36.109 | 12/31/2010 21:39:01 | 27.634 |
| 1/2/2011 15:24:01 | 35.673 | 12/31/2010 21:59:01 | 27.634 |
| 1/2/2011 15:44:01 | 35.361 | 12/31/2010 22:19:01 | 27.634 |
| 1/2/2011 16:04:01 | 34.676 | 12/31/2010 22:39:01 | 27.634 |
| 1/2/2011 16:24:01 | 33.679 | 12/31/2010 22:59:01 | 27.634 |
| 1/2/2011 16:44:01 | 33.118 | 12/31/2010 23:19:01 | 27.634 |
| 1/2/2011 17:04:01 | 32.432 | 12/31/2010 23:39:01 | 27.634 |
| 1/2/2011 17:24:01 | 31.621 | 12/31/2010 23:59:01 | 27.634 |
| 1/2/2011 17:44:01 | 30.498 | 1/1/2011 00:19:01   | 27.634 |
| 1/2/2011 18:04:01 | 29.437 | 1/1/2011 00:39:01   | 27.571 |
| 1/2/2011 18:24:01 | 28.376 | 1/1/2011 00:59:01   | 27.571 |
| 1/2/2011 18:44:01 | 27.376 | 1/1/2011 01:19:01   | 27.571 |
| 1/2/2011 19:04:01 | 27.376 | 1/1/2011 01:39:01   | 27.571 |
| 1/2/2011 19:24:01 | 27.439 | 1/1/2011 01:59:01   | 27.571 |

|                   |        |                   |        |
|-------------------|--------|-------------------|--------|
| 1/2/2011 19:44:01 | 27.439 | 1/1/2011 02:19:01 | 27.571 |
| 1/2/2011 20:04:01 | 27.126 | 1/1/2011 02:39:01 | 27.509 |
| 1/2/2011 20:24:01 | 26.439 | 1/1/2011 02:59:01 | 27.509 |
| 1/2/2011 20:44:01 | 25.752 | 1/1/2011 03:19:01 | 27.509 |
| 1/2/2011 21:04:01 | 25.064 | 1/1/2011 03:39:01 | 27.509 |
| 1/2/2011 21:24:01 | 24.439 | 1/1/2011 03:59:01 | 27.446 |
| 1/2/2011 21:44:01 | 24.127 | 1/1/2011 04:19:01 | 27.446 |
| 1/2/2011 22:04:01 | 23.877 | 1/1/2011 04:39:01 | 27.446 |
| 1/2/2011 22:24:01 | 23.627 | 1/1/2011 04:59:01 | 27.446 |
| 1/2/2011 22:44:01 | 23.314 | 1/1/2011 05:19:01 | 27.446 |
| 1/2/2011 23:04:01 | 23.001 | 1/1/2011 05:39:01 | 27.384 |
| 1/2/2011 23:24:01 | 22.939 | 1/1/2011 05:59:01 | 27.384 |
| 1/2/2011 23:44:01 | 23.189 | 1/1/2011 06:19:01 | 27.384 |
| 1/3/2011 00:04:01 | 22.939 | 1/1/2011 06:39:01 | 27.384 |
| 1/3/2011 00:24:01 | 22.563 | 1/1/2011 06:59:01 | 27.321 |
| 1/3/2011 00:44:01 | 22.313 | 1/1/2011 07:19:01 | 27.321 |
| 1/3/2011 01:04:01 | 22.063 | 1/1/2011 07:39:01 | 27.321 |
| 1/3/2011 01:24:01 | 21.875 | 1/1/2011 07:59:01 | 27.321 |
| 1/3/2011 01:44:01 | 21.562 | 1/1/2011 08:19:01 | 27.259 |
| 1/3/2011 02:04:01 | 21.375 | 1/1/2011 08:39:01 | 27.259 |
| 1/3/2011 02:24:01 | 21.124 | 1/1/2011 08:59:01 | 27.259 |
| 1/3/2011 02:44:01 | 20.999 | 1/1/2011 09:19:01 | 27.259 |
| 1/3/2011 03:04:01 | 20.811 | 1/1/2011 09:39:01 | 27.259 |
| 1/3/2011 03:24:01 | 20.686 | 1/1/2011 09:59:01 | 27.259 |
| 1/3/2011 03:44:01 | 20.561 | 1/1/2011 10:19:01 | 27.259 |
| 1/3/2011 04:04:01 | 20.498 | 1/1/2011 10:39:01 | 27.197 |
| 1/3/2011 04:24:01 | 20.373 | 1/1/2011 10:59:01 | 27.197 |
| 1/3/2011 04:44:01 | 20.311 | 1/1/2011 11:19:01 | 27.197 |
| 1/3/2011 05:04:01 | 20.186 | 1/1/2011 11:39:01 | 27.197 |
| 1/3/2011 05:24:01 | 20.123 | 1/1/2011 11:59:01 | 27.197 |
| 1/3/2011 05:44:01 | 20.123 | 1/1/2011 12:19:01 | 27.197 |
| 1/3/2011 06:04:01 | 20.248 | 1/1/2011 12:39:01 | 27.197 |
| 1/3/2011 06:24:01 | 20.937 | 1/1/2011 12:59:01 | 27.259 |
| 1/3/2011 06:44:01 | 21.875 | 1/1/2011 13:19:01 | 27.259 |
| 1/3/2011 07:04:01 | 23.376 | 1/1/2011 13:39:01 | 27.259 |
| 1/3/2011 07:24:01 | 24.252 | 1/1/2011 13:59:01 | 27.259 |
| 1/3/2011 07:44:01 | 25.627 | 1/1/2011 14:19:01 | 27.259 |
| 1/3/2011 08:04:01 | 27.938 | 1/1/2011 14:39:01 | 27.321 |
| 1/3/2011 08:24:01 | 28.438 | 1/1/2011 14:59:01 | 27.321 |
| 1/3/2011 08:44:01 | 29.187 | 1/1/2011 15:19:01 | 27.321 |
| 1/3/2011 09:04:01 | 30.123 | 1/1/2011 15:39:01 | 27.384 |
| 1/3/2011 09:24:01 | 30.747 | 1/1/2011 15:59:01 | 27.384 |
| 1/3/2011 09:44:01 | 32.743 | 1/1/2011 16:19:01 | 27.384 |
| 1/3/2011 10:04:01 | 33.616 | 1/1/2011 16:39:01 | 27.446 |
| 1/3/2011 10:24:01 | 34.053 | 1/1/2011 16:59:01 | 27.446 |
| 1/3/2011 10:44:01 | 34.302 | 1/1/2011 17:19:01 | 27.509 |
| 1/3/2011 11:04:01 | 35.112 | 1/1/2011 17:39:01 | 27.509 |
| 1/3/2011 11:24:01 | 35.486 | 1/1/2011 17:59:01 | 27.571 |
| 1/3/2011 11:44:01 | 35.860 | 1/1/2011 18:19:01 | 27.571 |
| 1/3/2011 12:04:01 | 36.607 | 1/1/2011 18:39:01 | 27.634 |

|                   |        |                   |        |
|-------------------|--------|-------------------|--------|
| 1/3/2011 12:24:01 | 37.355 | 1/1/2011 18:59:01 | 27.634 |
| 1/3/2011 12:44:01 | 37.915 | 1/1/2011 19:19:01 | 27.634 |
| 1/3/2011 13:04:01 | 37.915 | 1/1/2011 19:39:01 | 27.696 |
| 1/3/2011 13:24:01 | 36.545 | 1/1/2011 19:59:01 | 27.696 |
| 1/3/2011 13:44:01 | 37.977 | 1/1/2011 20:19:01 | 27.696 |
| 1/3/2011 14:04:01 | 38.475 | 1/1/2011 20:39:01 | 27.696 |
| 1/3/2011 14:24:01 | 36.109 | 1/1/2011 20:59:01 | 27.696 |
| 1/3/2011 14:44:01 | 34.925 | 1/1/2011 21:19:01 | 27.696 |
| 1/3/2011 15:04:01 | 36.981 | 1/1/2011 21:39:01 | 27.696 |
| 1/3/2011 15:24:01 | 36.109 | 1/1/2011 21:59:01 | 27.759 |
| 1/3/2011 15:44:01 | 35.486 | 1/1/2011 22:19:01 | 27.759 |
| 1/3/2011 16:04:01 | 34.863 | 1/1/2011 22:39:01 | 27.759 |
| 1/3/2011 16:24:01 | 34.115 | 1/1/2011 22:59:01 | 27.759 |
| 1/3/2011 16:44:01 | 33.429 | 1/1/2011 23:19:01 | 27.759 |
| 1/3/2011 17:04:01 | 32.619 | 1/1/2011 23:39:01 | 27.759 |
| 1/3/2011 17:24:01 | 31.621 | 1/1/2011 23:59:01 | 27.696 |
| 1/3/2011 17:44:01 | 30.747 | 1/2/2011 00:19:01 | 27.696 |
| 1/3/2011 18:04:01 | 29.374 | 1/2/2011 00:39:01 | 27.696 |
| 1/3/2011 18:24:01 | 28.376 | 1/2/2011 00:59:01 | 27.696 |
| 1/3/2011 18:44:01 | 27.439 | 1/2/2011 01:19:01 | 27.696 |
| 1/3/2011 19:04:01 | 26.752 | 1/2/2011 01:39:01 | 27.696 |
| 1/3/2011 19:24:01 | 26.127 | 1/2/2011 01:59:01 | 27.696 |
| 1/3/2011 19:44:01 | 26.314 | 1/2/2011 02:19:01 | 27.696 |
| 1/3/2011 20:04:01 | 26.689 | 1/2/2011 02:39:01 | 27.696 |
| 1/3/2011 20:24:01 | 27.189 | 1/2/2011 02:59:01 | 27.634 |
| 1/3/2011 20:44:01 | 26.877 | 1/2/2011 03:19:01 | 27.634 |
| 1/3/2011 21:04:01 | 26.127 | 1/2/2011 03:39:01 | 27.634 |
| 1/3/2011 21:24:01 | 25.689 | 1/2/2011 03:59:01 | 27.634 |
| 1/3/2011 21:44:01 | 25.189 | 1/2/2011 04:19:01 | 27.634 |
| 1/3/2011 22:04:01 | 24.877 | 1/2/2011 04:39:01 | 27.634 |
| 1/3/2011 22:24:01 | 24.564 | 1/2/2011 04:59:01 | 27.571 |
| 1/3/2011 22:44:01 | 24.314 | 1/2/2011 05:19:01 | 27.571 |
| 1/3/2011 23:04:01 | 24.002 | 1/2/2011 05:39:01 | 27.571 |
| 1/3/2011 23:24:01 | 24.189 | 1/2/2011 05:59:01 | 27.571 |
| 1/3/2011 23:44:01 | 24.439 | 1/2/2011 06:19:01 | 27.571 |
| 1/4/2011 00:04:01 | 24.564 | 1/2/2011 06:39:01 | 27.571 |
| 1/4/2011 00:24:01 | 24.314 | 1/2/2011 06:59:01 | 27.509 |
| 1/4/2011 00:44:01 | 24.064 | 1/2/2011 07:19:01 | 27.509 |
| 1/4/2011 01:04:01 | 23.564 | 1/2/2011 07:39:01 | 27.509 |
| 1/4/2011 01:24:01 | 23.251 | 1/2/2011 07:59:01 | 27.509 |
| 1/4/2011 01:44:01 | 23.314 | 1/2/2011 08:19:01 | 27.509 |
| 1/4/2011 02:04:01 | 23.064 | 1/2/2011 08:39:01 | 27.509 |
| 1/4/2011 02:24:01 | 22.751 | 1/2/2011 08:59:01 | 27.446 |
| 1/4/2011 02:44:01 | 22.626 | 1/2/2011 09:19:01 | 27.446 |
| 1/4/2011 03:04:01 | 22.626 | 1/2/2011 09:39:01 | 27.446 |
| 1/4/2011 03:24:01 | 22.814 | 1/2/2011 09:59:01 | 27.446 |
| 1/4/2011 03:44:01 | 23.001 | 1/2/2011 10:19:01 | 27.446 |
| 1/4/2011 04:04:01 | 23.126 | 1/2/2011 10:39:01 | 27.446 |
| 1/4/2011 04:24:01 | 22.876 | 1/2/2011 10:59:01 | 27.446 |
| 1/4/2011 04:44:01 | 22.876 | 1/2/2011 11:19:01 | 27.384 |

|                   |        |                   |        |
|-------------------|--------|-------------------|--------|
| 1/4/2011 05:04:01 | 22.814 | 1/2/2011 11:39:01 | 27.446 |
| 1/4/2011 05:24:01 | 22.751 | 1/2/2011 11:59:01 | 27.446 |
| 1/4/2011 05:44:01 | 22.876 | 1/2/2011 12:19:01 | 27.384 |
| 1/4/2011 06:04:01 | 23.251 | 1/2/2011 12:39:01 | 27.446 |
| 1/4/2011 06:24:01 | 23.877 | 1/2/2011 12:59:01 | 27.446 |
| 1/4/2011 06:44:01 | 24.377 | 1/2/2011 13:19:01 | 27.446 |
| 1/4/2011 07:04:01 | 24.689 | 1/2/2011 13:39:01 | 27.446 |
| 1/4/2011 07:24:01 | 25.314 | 1/2/2011 13:59:01 | 27.446 |
| 1/4/2011 07:44:01 | 26.189 | 1/2/2011 14:19:01 | 27.446 |
| 1/4/2011 08:04:01 | 27.251 | 1/2/2011 14:39:01 | 27.446 |
| 1/4/2011 08:24:01 | 28.875 | 1/2/2011 14:59:01 | 27.509 |
| 1/4/2011 08:44:01 | 30.123 | 1/2/2011 15:19:01 | 27.509 |
| 1/4/2011 09:04:01 | 30.311 | 1/2/2011 15:39:01 | 27.509 |
| 1/4/2011 09:24:01 | 31.371 | 1/2/2011 15:59:01 | 27.509 |
| 1/4/2011 09:44:01 | 31.808 | 1/2/2011 16:19:01 | 27.571 |
| 1/4/2011 10:04:01 | 34.115 | 1/2/2011 16:39:01 | 27.571 |
| 1/4/2011 10:24:01 | 34.863 | 1/2/2011 16:59:01 | 27.571 |
| 1/4/2011 10:44:01 | 35.175 | 1/2/2011 17:19:01 | 27.634 |
| 1/4/2011 11:04:01 | 35.922 | 1/2/2011 17:39:01 | 27.634 |
| 1/4/2011 11:24:01 | 36.421 | 1/2/2011 17:59:01 | 27.634 |
| 1/4/2011 11:44:01 | 36.919 | 1/2/2011 18:19:01 | 27.696 |
| 1/4/2011 12:04:01 | 37.479 | 1/2/2011 18:39:01 | 27.696 |
| 1/4/2011 12:24:01 | 38.351 | 1/2/2011 18:59:01 | 27.696 |
| 1/4/2011 12:44:01 | 38.600 | 1/2/2011 19:19:01 | 27.759 |
| 1/4/2011 13:04:01 | 39.036 | 1/2/2011 19:39:01 | 27.759 |
| 1/4/2011 13:24:01 | 38.413 | 1/2/2011 19:59:01 | 27.759 |
| 1/4/2011 13:44:01 | 38.351 | 1/2/2011 20:19:01 | 27.759 |
| 1/4/2011 14:04:01 | 38.600 | 1/2/2011 20:39:01 | 27.759 |
| 1/4/2011 14:24:01 | 38.351 | 1/2/2011 20:59:01 | 27.821 |
| 1/4/2011 14:44:01 | 35.673 | 1/2/2011 21:19:01 | 27.821 |
| 1/4/2011 15:04:01 | 34.364 | 1/2/2011 21:39:01 | 27.821 |
| 1/4/2011 15:24:01 | 33.803 | 1/2/2011 21:59:01 | 27.759 |
| 1/4/2011 15:44:01 | 34.551 | 1/2/2011 22:19:01 | 27.759 |
| 1/4/2011 16:04:01 | 34.925 | 1/2/2011 22:39:01 | 27.759 |
| 1/4/2011 16:24:01 | 34.676 | 1/2/2011 22:59:01 | 27.759 |
| 1/4/2011 16:44:01 | 34.302 | 1/2/2011 23:19:01 | 27.759 |
| 1/4/2011 17:04:01 | 33.118 | 1/2/2011 23:39:01 | 27.759 |
| 1/4/2011 17:24:01 | 32.307 | 1/2/2011 23:59:01 | 27.759 |
| 1/4/2011 17:44:01 | 31.184 | 1/3/2011 00:19:01 | 27.759 |
| 1/4/2011 18:04:01 | 29.749 | 1/3/2011 00:39:01 | 27.759 |
| 1/4/2011 18:24:01 | 28.563 | 1/3/2011 00:59:01 | 27.759 |
| 1/4/2011 18:44:01 | 27.439 | 1/3/2011 01:19:01 | 27.759 |
| 1/4/2011 19:04:01 | 26.627 | 1/3/2011 01:39:01 | 27.696 |
| 1/4/2011 19:24:01 | 26.939 | 1/3/2011 01:59:01 | 27.696 |
| 1/4/2011 19:44:01 | 27.626 | 1/3/2011 02:19:01 | 27.696 |
| 1/4/2011 20:04:01 | 28.063 | 1/3/2011 02:39:01 | 27.696 |
| 1/4/2011 20:24:01 | 28.063 | 1/3/2011 02:59:01 | 27.634 |
| 1/4/2011 20:44:01 | 27.876 | 1/3/2011 03:19:01 | 27.634 |
| 1/4/2011 21:04:01 | 27.439 | 1/3/2011 03:39:01 | 27.634 |
| 1/4/2011 21:24:01 | 26.627 | 1/3/2011 03:59:01 | 27.634 |

|                   |        |                   |        |
|-------------------|--------|-------------------|--------|
| 1/4/2011 21:44:01 | 25.752 | 1/3/2011 04:19:01 | 27.571 |
| 1/4/2011 22:04:01 | 25.877 | 1/3/2011 04:39:01 | 27.571 |
| 1/4/2011 22:24:01 | 26.502 | 1/3/2011 04:59:01 | 27.571 |
| 1/4/2011 22:44:01 | 25.627 | 1/3/2011 05:19:01 | 27.509 |
| 1/4/2011 23:04:01 | 22.125 | 1/3/2011 05:39:01 | 27.509 |
| 1/4/2011 23:24:01 | 21.687 | 1/3/2011 05:59:01 | 27.509 |
| 1/4/2011 23:44:01 | 22.000 | 1/3/2011 06:19:01 | 27.509 |
| 1/5/2011 00:04:01 | 22.063 | 1/3/2011 06:39:01 | 27.446 |
| 1/5/2011 00:24:01 | 21.938 | 1/3/2011 06:59:01 | 27.446 |
| 1/5/2011 00:44:01 | 21.813 | 1/3/2011 07:19:01 | 27.446 |
| 1/5/2011 01:04:01 | 21.625 | 1/3/2011 07:39:01 | 27.384 |
| 1/5/2011 01:24:01 | 21.500 | 1/3/2011 07:59:01 | 27.384 |
| 1/5/2011 01:44:01 | 21.687 | 1/3/2011 08:19:01 | 27.321 |
| 1/5/2011 02:04:01 | 21.750 | 1/3/2011 08:39:01 | 27.321 |
| 1/5/2011 02:24:01 | 21.750 | 1/3/2011 08:59:01 | 27.321 |
| 1/5/2011 02:44:01 | 21.687 | 1/3/2011 09:19:01 | 27.321 |
| 1/5/2011 03:04:01 | 21.687 | 1/3/2011 09:39:01 | 27.259 |
| 1/5/2011 03:24:01 | 21.562 | 1/3/2011 09:59:01 | 27.259 |
| 1/5/2011 03:44:01 | 21.375 | 1/3/2011 10:19:01 | 27.259 |
| 1/5/2011 04:04:01 | 21.124 | 1/3/2011 10:39:01 | 27.259 |
| 1/5/2011 04:24:01 | 20.937 | 1/3/2011 10:59:01 | 27.259 |
| 1/5/2011 04:44:01 | 20.749 | 1/3/2011 11:19:01 | 27.197 |
| 1/5/2011 05:04:01 | 20.498 | 1/3/2011 11:39:01 | 27.197 |
| 1/5/2011 05:24:01 | 20.373 | 1/3/2011 11:59:01 | 27.197 |
| 1/5/2011 05:44:01 | 20.248 | 1/3/2011 12:19:01 | 27.197 |
| 1/5/2011 06:04:01 | 20.248 | 1/3/2011 12:39:01 | 27.197 |
| 1/5/2011 06:24:01 | 20.686 | 1/3/2011 12:59:01 | 27.197 |
| 1/5/2011 06:44:01 | 21.312 | 1/3/2011 13:19:01 | 27.197 |
| 1/5/2011 07:04:01 | 22.438 | 1/3/2011 13:39:01 | 27.259 |
| 1/5/2011 07:24:01 | 23.439 | 1/3/2011 13:59:01 | 27.259 |
| 1/5/2011 07:44:01 | 24.502 | 1/3/2011 14:19:01 | 27.259 |
| 1/5/2011 08:04:01 | 25.877 | 1/3/2011 14:39:01 | 27.259 |
| 1/5/2011 08:24:01 | 25.939 | 1/3/2011 14:59:01 | 27.259 |
| 1/5/2011 08:44:01 | 26.627 | 1/3/2011 15:19:01 | 27.321 |
| 1/5/2011 09:04:01 | 26.752 | 1/3/2011 15:39:01 | 27.321 |
| 1/5/2011 09:24:01 | 27.439 | 1/3/2011 15:59:01 | 27.321 |
| 1/5/2011 09:44:01 | 29.312 | 1/3/2011 16:19:01 | 27.384 |
| 1/5/2011 10:04:01 | 30.560 | 1/3/2011 16:39:01 | 27.384 |
| 1/5/2011 10:24:01 | 30.810 | 1/3/2011 16:59:01 | 27.384 |
| 1/5/2011 10:44:01 | 31.247 | 1/3/2011 17:19:01 | 27.446 |
| 1/5/2011 11:04:01 | 32.057 | 1/3/2011 17:39:01 | 27.446 |
| 1/5/2011 11:24:01 | 32.806 | 1/3/2011 17:59:01 | 27.509 |
| 1/5/2011 11:44:01 | 33.429 | 1/3/2011 18:19:01 | 27.509 |
| 1/5/2011 12:04:01 | 34.053 | 1/3/2011 18:39:01 | 27.509 |
| 1/5/2011 12:24:01 | 34.801 | 1/3/2011 18:59:01 | 27.571 |
| 1/5/2011 12:44:01 | 35.299 | 1/3/2011 19:19:01 | 27.571 |
| 1/5/2011 13:04:01 | 35.361 | 1/3/2011 19:39:01 | 27.571 |
| 1/5/2011 13:24:01 | 35.361 | 1/3/2011 19:59:01 | 27.634 |
| 1/5/2011 13:44:01 | 35.798 | 1/3/2011 20:19:01 | 27.634 |
| 1/5/2011 14:04:01 | 36.047 | 1/3/2011 20:39:01 | 27.634 |

|                   |        |                   |        |
|-------------------|--------|-------------------|--------|
| 1/5/2011 14:24:01 | 36.234 | 1/3/2011 20:59:01 | 27.634 |
| 1/5/2011 14:44:01 | 36.171 | 1/3/2011 21:19:01 | 27.634 |
| 1/5/2011 15:04:01 | 35.673 | 1/3/2011 21:39:01 | 27.634 |
| 1/5/2011 15:24:01 | 33.990 | 1/3/2011 21:59:01 | 27.634 |
| 1/5/2011 15:44:01 | 32.743 | 1/3/2011 22:19:01 | 27.634 |
| 1/5/2011 16:04:01 | 31.995 | 1/3/2011 22:39:01 | 27.634 |
| 1/5/2011 16:24:01 | 31.247 | 1/3/2011 22:59:01 | 27.634 |
| 1/5/2011 16:44:01 | 30.311 | 1/3/2011 23:19:01 | 27.634 |
| 1/5/2011 17:04:01 | 29.499 | 1/3/2011 23:39:01 | 27.634 |
| 1/5/2011 17:24:01 | 28.750 | 1/3/2011 23:59:01 | 27.634 |
| 1/5/2011 17:44:01 | 28.188 | 1/4/2011 00:19:01 | 27.634 |
| 1/5/2011 18:04:01 | 27.501 | 1/4/2011 00:39:01 | 27.634 |
| 1/5/2011 18:24:01 | 26.814 | 1/4/2011 00:59:01 | 27.634 |
| 1/5/2011 18:44:01 | 26.064 | 1/4/2011 01:19:01 | 27.634 |
| 1/5/2011 19:04:01 | 25.564 | 1/4/2011 01:39:01 | 27.571 |
| 1/5/2011 19:24:01 | 25.377 | 1/4/2011 01:59:01 | 27.571 |
| 1/5/2011 19:44:01 | 25.439 | 1/4/2011 02:19:01 | 27.571 |
| 1/5/2011 20:04:01 | 25.064 | 1/4/2011 02:39:01 | 27.571 |
| 1/5/2011 20:24:01 | 24.627 | 1/4/2011 02:59:01 | 27.571 |
| 1/5/2011 20:44:01 | 24.377 | 1/4/2011 03:19:01 | 27.509 |
| 1/5/2011 21:04:01 | 24.189 | 1/4/2011 03:39:01 | 27.509 |
| 1/5/2011 21:24:01 | 24.064 | 1/4/2011 03:59:01 | 27.509 |
| 1/5/2011 21:44:01 | 23.877 | 1/4/2011 04:19:01 | 27.509 |
| 1/5/2011 22:04:01 | 23.814 | 1/4/2011 04:39:01 | 27.509 |
| 1/5/2011 22:24:01 | 23.939 | 1/4/2011 04:59:01 | 27.446 |
| 1/5/2011 22:44:01 | 24.064 | 1/4/2011 05:19:01 | 27.446 |
| 1/5/2011 23:04:01 | 24.189 | 1/4/2011 05:39:01 | 27.446 |
| 1/5/2011 23:24:01 | 24.314 | 1/4/2011 05:59:01 | 27.446 |
| 1/5/2011 23:44:01 | 24.439 | 1/4/2011 06:19:01 | 27.446 |
| 1/6/2011 00:04:01 | 23.752 | 1/4/2011 06:39:01 | 27.384 |
| 1/6/2011 00:24:01 | 23.189 | 1/4/2011 06:59:01 | 27.384 |
| 1/6/2011 00:44:01 | 22.876 | 1/4/2011 07:19:01 | 27.384 |
| 1/6/2011 01:04:01 | 22.814 | 1/4/2011 07:39:01 | 27.384 |
| 1/6/2011 01:24:01 | 22.814 | 1/4/2011 07:59:01 | 27.321 |
| 1/6/2011 01:44:01 | 22.688 | 1/4/2011 08:19:01 | 27.321 |
| 1/6/2011 02:04:01 | 22.626 | 1/4/2011 08:39:01 | 27.321 |
| 1/6/2011 02:24:01 | 22.501 | 1/4/2011 08:59:01 | 27.321 |
| 1/6/2011 02:44:01 | 22.376 | 1/4/2011 09:19:01 | 27.321 |
| 1/6/2011 03:04:01 | 22.438 | 1/4/2011 09:39:01 | 27.259 |
| 1/6/2011 03:24:01 | 22.438 | 1/4/2011 09:59:01 | 27.259 |
| 1/6/2011 03:44:01 | 22.313 | 1/4/2011 10:19:01 | 27.259 |
| 1/6/2011 04:04:01 | 22.313 | 1/4/2011 10:39:01 | 27.259 |
| 1/6/2011 04:24:01 | 22.376 | 1/4/2011 10:59:01 | 27.259 |
| 1/6/2011 04:44:01 | 22.376 | 1/4/2011 11:19:01 | 27.259 |
| 1/6/2011 05:04:01 | 22.438 | 1/4/2011 11:39:01 | 27.259 |
| 1/6/2011 05:24:01 | 22.501 | 1/4/2011 11:59:01 | 27.259 |
| 1/6/2011 05:44:01 | 22.438 | 1/4/2011 12:19:01 | 27.259 |
| 1/6/2011 06:04:01 | 22.501 | 1/4/2011 12:39:01 | 27.259 |
| 1/6/2011 06:24:01 | 23.126 | 1/4/2011 12:59:01 | 27.259 |
| 1/6/2011 06:44:01 | 23.627 | 1/4/2011 13:19:01 | 27.259 |

|                   |        |                   |        |
|-------------------|--------|-------------------|--------|
| 1/6/2011 07:04:01 | 23.939 | 1/4/2011 13:39:01 | 27.259 |
| 1/6/2011 07:24:01 | 24.314 | 1/4/2011 13:59:01 | 27.259 |
| 1/6/2011 07:44:01 | 25.377 | 1/4/2011 14:19:01 | 27.321 |
| 1/6/2011 08:04:01 | 26.189 | 1/4/2011 14:39:01 | 27.321 |
| 1/6/2011 08:24:01 | 26.002 | 1/4/2011 14:59:01 | 27.321 |
| 1/6/2011 08:44:01 | 27.689 | 1/4/2011 15:19:01 | 27.384 |
| 1/6/2011 09:04:01 | 28.188 | 1/4/2011 15:39:01 | 27.384 |
| 1/6/2011 09:24:01 | 28.875 | 1/4/2011 15:59:01 | 27.384 |
| 1/6/2011 09:44:01 | 30.997 | 1/4/2011 16:19:01 | 27.446 |
| 1/6/2011 10:04:01 | 31.746 | 1/4/2011 16:39:01 | 27.446 |
| 1/6/2011 10:24:01 | 32.245 | 1/4/2011 16:59:01 | 27.509 |
| 1/6/2011 10:44:01 | 32.307 | 1/4/2011 17:19:01 | 27.509 |
| 1/6/2011 11:04:01 | 32.681 | 1/4/2011 17:39:01 | 27.509 |
| 1/6/2011 11:24:01 | 33.305 | 1/4/2011 17:59:01 | 27.571 |
| 1/6/2011 11:44:01 | 31.995 | 1/4/2011 18:19:01 | 27.571 |
| 1/6/2011 12:04:01 | 32.432 | 1/4/2011 18:39:01 | 27.634 |
| 1/6/2011 12:24:01 | 34.925 | 1/4/2011 18:59:01 | 27.634 |
| 1/6/2011 12:44:01 | 35.424 | 1/4/2011 19:19:01 | 27.634 |
| 1/6/2011 13:04:01 | 35.548 | 1/4/2011 19:39:01 | 27.634 |
| 1/6/2011 13:24:01 | 34.364 | 1/4/2011 19:59:01 | 27.696 |
| 1/6/2011 13:44:01 | 35.673 | 1/4/2011 20:19:01 | 27.696 |
| 1/6/2011 14:04:01 | 36.109 | 1/4/2011 20:39:01 | 27.696 |
| 1/6/2011 14:24:01 | 36.171 | 1/4/2011 20:59:01 | 27.696 |
| 1/6/2011 14:44:01 | 35.860 | 1/4/2011 21:19:01 | 27.696 |
| 1/6/2011 15:04:01 | 35.237 | 1/4/2011 21:39:01 | 27.696 |
| 1/6/2011 15:24:01 | 34.115 | 1/4/2011 21:59:01 | 27.696 |
| 1/6/2011 15:44:01 | 33.367 | 1/4/2011 22:19:01 | 27.696 |
| 1/6/2011 16:04:01 | 32.743 | 1/4/2011 22:39:01 | 27.696 |
| 1/6/2011 16:24:01 | 32.057 | 1/4/2011 22:59:01 | 27.696 |
| 1/6/2011 16:44:01 | 31.309 | 1/4/2011 23:19:01 | 27.696 |
| 1/6/2011 17:04:01 | 30.685 | 1/4/2011 23:39:01 | 27.696 |
| 1/6/2011 17:24:01 | 30.248 | 1/4/2011 23:59:01 | 27.696 |
| 1/6/2011 17:44:01 | 29.749 | 1/5/2011 00:19:01 | 27.696 |
| 1/6/2011 18:04:01 | 29.125 | 1/5/2011 00:39:01 | 27.634 |
| 1/6/2011 18:24:01 | 28.438 | 1/5/2011 00:59:01 | 27.634 |
| 1/6/2011 18:44:01 | 27.751 | 1/5/2011 01:19:01 | 27.571 |
| 1/6/2011 19:04:01 | 26.877 | 1/5/2011 01:39:01 | 27.509 |
| 1/6/2011 19:24:01 | 26.189 | 1/5/2011 01:59:01 | 27.446 |
| 1/6/2011 19:44:01 | 25.627 | 1/5/2011 02:19:01 | 27.384 |
| 1/6/2011 20:04:01 | 25.252 | 1/5/2011 02:39:01 | 27.321 |
| 1/6/2011 20:24:01 | 25.002 | 1/5/2011 02:59:01 | 27.259 |
| 1/6/2011 20:44:01 | 24.752 | 1/5/2011 03:19:01 | 27.259 |
| 1/6/2011 21:04:01 | 24.502 | 1/5/2011 03:39:01 | 27.197 |
| 1/6/2011 21:24:01 | 24.252 | 1/5/2011 03:59:01 | 27.134 |
| 1/6/2011 21:44:01 | 23.939 | 1/5/2011 04:19:01 | 27.134 |
| 1/6/2011 22:04:01 | 23.689 | 1/5/2011 04:39:01 | 27.072 |
| 1/6/2011 22:24:01 | 23.564 | 1/5/2011 04:59:01 | 27.072 |
| 1/6/2011 22:44:01 | 23.376 | 1/5/2011 05:19:01 | 27.009 |
| 1/6/2011 23:04:01 | 23.314 | 1/5/2011 05:39:01 | 27.009 |
| 1/6/2011 23:24:01 | 23.189 | 1/5/2011 05:59:01 | 26.947 |



|                   |        |                   |        |
|-------------------|--------|-------------------|--------|
| 1/6/2011 23:44:01 | 23.314 | 1/5/2011 06:19:01 | 26.947 |
| 1/7/2011 00:04:01 | 23.314 | 1/5/2011 06:39:01 | 26.947 |
| 1/7/2011 00:24:01 | 23.439 | 1/5/2011 06:59:01 | 26.884 |
| 1/7/2011 00:44:01 | 23.564 | 1/5/2011 07:19:01 | 26.884 |
| 1/7/2011 01:04:01 | 23.501 | 1/5/2011 07:39:01 | 26.884 |
| 1/7/2011 01:24:01 | 23.314 | 1/5/2011 07:59:01 | 26.822 |
| 1/7/2011 01:44:01 | 23.251 | 1/5/2011 08:19:01 | 26.822 |
| 1/7/2011 02:04:01 | 23.064 | 1/5/2011 08:39:01 | 26.822 |
| 1/7/2011 02:24:01 | 22.876 | 1/5/2011 08:59:01 | 26.759 |
| 1/7/2011 02:44:01 | 22.751 | 1/5/2011 09:19:01 | 26.759 |
| 1/7/2011 03:04:01 | 23.001 | 1/5/2011 09:39:01 | 26.759 |
| 1/7/2011 03:24:01 | 23.189 | 1/5/2011 09:59:01 | 26.697 |
| 1/7/2011 03:44:01 | 23.251 | 1/5/2011 10:19:01 | 26.697 |
| 1/7/2011 04:04:01 | 23.564 | 1/5/2011 10:39:01 | 26.697 |
| 1/7/2011 04:24:01 | 23.376 | 1/5/2011 10:59:01 | 26.697 |
| 1/7/2011 04:44:01 | 22.814 | 1/5/2011 11:19:01 | 26.697 |
| 1/7/2011 05:04:01 | 22.751 | 1/5/2011 11:39:01 | 26.697 |
| 1/7/2011 05:24:01 | 22.751 | 1/5/2011 11:59:01 | 26.697 |
| 1/7/2011 05:44:01 | 22.688 | 1/5/2011 12:19:01 | 26.697 |
| 1/7/2011 06:04:01 | 22.876 | 1/5/2011 12:39:01 | 26.697 |
| 1/7/2011 06:24:01 | 23.251 | 1/5/2011 12:59:01 | 26.697 |
| 1/7/2011 06:44:01 | 23.814 | 1/5/2011 13:19:01 | 26.759 |
| 1/7/2011 07:04:01 | 24.189 | 1/5/2011 13:39:01 | 26.759 |
| 1/7/2011 07:24:01 | 24.502 | 1/5/2011 13:59:01 | 26.759 |
| 1/7/2011 07:44:01 | 24.627 | 1/5/2011 14:19:01 | 26.759 |
| 1/7/2011 08:04:01 | 25.189 | 1/5/2011 14:39:01 | 26.822 |
| 1/7/2011 08:24:01 | 25.752 | 1/5/2011 14:59:01 | 26.822 |
| 1/7/2011 08:44:01 | 25.689 | 1/5/2011 15:19:01 | 26.884 |
| 1/7/2011 09:04:01 | 25.877 | 1/5/2011 15:39:01 | 26.884 |
| 1/7/2011 09:24:01 | 26.064 | 1/5/2011 15:59:01 | 26.884 |
| 1/7/2011 09:44:01 | 29.062 | 1/5/2011 16:19:01 | 26.947 |
| 1/7/2011 10:04:01 | 29.624 | 1/5/2011 16:39:01 | 26.947 |
| 1/7/2011 10:24:01 | 29.624 | 1/5/2011 16:59:01 | 27.009 |
| 1/7/2011 10:44:01 | 29.062 | 1/5/2011 17:19:01 | 27.009 |
| 1/7/2011 11:04:01 | 29.936 | 1/5/2011 17:39:01 | 27.072 |
| 1/7/2011 11:24:01 | 28.937 | 1/5/2011 17:59:01 | 27.072 |
| 1/7/2011 11:44:01 | 29.312 | 1/5/2011 18:19:01 | 27.134 |
| 1/7/2011 12:04:01 | 29.624 | 1/5/2011 18:39:01 | 27.134 |
| 1/7/2011 12:24:01 | 31.496 | 1/5/2011 18:59:01 | 27.197 |
| 1/7/2011 12:44:01 | 32.619 | 1/5/2011 19:19:01 | 27.197 |
| 1/7/2011 13:04:01 | 33.242 | 1/5/2011 19:39:01 | 27.197 |
| 1/7/2011 13:24:01 | 33.741 | 1/5/2011 19:59:01 | 27.259 |
| 1/7/2011 13:44:01 | 33.741 | 1/5/2011 20:19:01 | 27.259 |
| 1/7/2011 14:04:01 | 34.614 | 1/5/2011 20:39:01 | 27.259 |
| 1/7/2011 14:24:01 | 31.434 | 1/5/2011 20:59:01 | 27.259 |
| 1/7/2011 14:44:01 | 31.870 | 1/5/2011 21:19:01 | 27.259 |
| 1/7/2011 15:04:01 | 33.741 | 1/5/2011 21:39:01 | 27.259 |
| 1/7/2011 15:24:01 | 32.432 | 1/5/2011 21:59:01 | 27.259 |
| 1/7/2011 15:44:01 | 31.309 | 1/5/2011 22:19:01 | 27.259 |
| 1/7/2011 16:04:01 | 30.560 | 1/5/2011 22:39:01 | 27.259 |

|                   |        |                   |        |
|-------------------|--------|-------------------|--------|
| 1/7/2011 16:24:01 | 29.936 | 1/5/2011 22:59:01 | 27.259 |
| 1/7/2011 16:44:01 | 29.125 | 1/5/2011 23:19:01 | 27.259 |
| 1/7/2011 17:04:01 | 28.688 | 1/5/2011 23:39:01 | 27.259 |
| 1/7/2011 17:24:01 | 28.438 | 1/5/2011 23:59:01 | 27.259 |
| 1/7/2011 17:44:01 | 28.126 | 1/6/2011 00:19:01 | 27.259 |
| 1/7/2011 18:04:01 | 27.938 | 1/6/2011 00:39:01 | 27.259 |
| 1/7/2011 18:24:01 | 27.501 | 1/6/2011 00:59:01 | 27.259 |
| 1/7/2011 18:44:01 | 26.939 | 1/6/2011 01:19:01 | 27.259 |
| 1/7/2011 19:04:01 | 26.127 | 1/6/2011 01:39:01 | 27.259 |
| 1/7/2011 19:24:01 | 25.439 | 1/6/2011 01:59:01 | 27.259 |
| 1/7/2011 19:44:01 | 25.002 | 1/6/2011 02:19:01 | 27.197 |
| 1/7/2011 20:04:01 | 24.939 | 1/6/2011 02:39:01 | 27.197 |
| 1/7/2011 20:24:01 | 24.752 | 1/6/2011 02:59:01 | 27.197 |
| 1/7/2011 20:44:01 | 24.564 | 1/6/2011 03:19:01 | 27.197 |
| 1/7/2011 21:04:01 | 24.377 | 1/6/2011 03:39:01 | 27.197 |
| 1/7/2011 21:24:01 | 24.314 | 1/6/2011 03:59:01 | 27.134 |
| 1/7/2011 21:44:01 | 24.377 | 1/6/2011 04:19:01 | 27.134 |
| 1/7/2011 22:04:01 | 24.439 | 1/6/2011 04:39:01 | 27.134 |
| 1/7/2011 22:24:01 | 24.377 | 1/6/2011 04:59:01 | 27.134 |
| 1/7/2011 22:44:01 | 24.252 | 1/6/2011 05:19:01 | 27.134 |
| 1/7/2011 23:04:01 | 24.064 | 1/6/2011 05:39:01 | 27.134 |
| 1/7/2011 23:24:01 | 23.877 | 1/6/2011 05:59:01 | 27.072 |
| 1/7/2011 23:44:01 | 23.877 | 1/6/2011 06:19:01 | 27.072 |
| 1/8/2011 00:04:01 | 24.064 | 1/6/2011 06:39:01 | 27.072 |
| 1/8/2011 00:24:01 | 24.189 | 1/6/2011 06:59:01 | 27.072 |
| 1/8/2011 00:44:01 | 24.189 | 1/6/2011 07:19:01 | 27.009 |
| 1/8/2011 01:04:01 | 24.252 | 1/6/2011 07:39:01 | 27.009 |
| 1/8/2011 01:24:01 | 24.314 | 1/6/2011 07:59:01 | 27.009 |
| 1/8/2011 01:44:01 | 24.502 | 1/6/2011 08:19:01 | 27.009 |
| 1/8/2011 02:04:01 | 24.502 | 1/6/2011 08:39:01 | 27.009 |
| 1/8/2011 02:24:01 | 24.064 | 1/6/2011 08:59:01 | 26.947 |
| 1/8/2011 02:44:01 | 23.439 | 1/6/2011 09:19:01 | 26.947 |
| 1/8/2011 03:04:01 | 23.064 | 1/6/2011 09:39:01 | 26.947 |
| 1/8/2011 03:24:01 | 22.939 | 1/6/2011 09:59:01 | 26.947 |
| 1/8/2011 03:44:01 | 22.939 | 1/6/2011 10:19:01 | 26.947 |
| 1/8/2011 04:04:01 | 22.814 | 1/6/2011 10:39:01 | 26.947 |
| 1/8/2011 04:24:01 | 22.814 | 1/6/2011 10:59:01 | 26.947 |
| 1/8/2011 04:44:01 | 22.751 | 1/6/2011 11:19:01 | 26.947 |
| 1/8/2011 05:04:01 | 22.751 | 1/6/2011 11:39:01 | 26.947 |
| 1/8/2011 05:24:01 | 22.688 | 1/6/2011 11:59:01 | 26.947 |
| 1/8/2011 05:44:01 | 22.751 | 1/6/2011 12:19:01 | 26.947 |
| 1/8/2011 06:04:01 | 22.876 | 1/6/2011 12:39:01 | 26.947 |
| 1/8/2011 06:24:01 | 23.251 | 1/6/2011 12:59:01 | 26.947 |
| 1/8/2011 06:44:01 | 23.564 | 1/6/2011 13:19:01 | 26.947 |
| 1/8/2011 07:04:01 | 24.314 | 1/6/2011 13:39:01 | 26.947 |
| 1/8/2011 07:24:01 | 24.877 | 1/6/2011 13:59:01 | 26.947 |
| 1/8/2011 07:44:01 | 25.252 | 1/6/2011 14:19:01 | 27.009 |
| 1/8/2011 08:04:01 | 26.189 | 1/6/2011 14:39:01 | 27.009 |
| 1/8/2011 08:24:01 | 27.002 | 1/6/2011 14:59:01 | 27.009 |
| 1/8/2011 08:44:01 | 27.189 | 1/6/2011 15:19:01 | 27.009 |

|                   |        |                   |        |
|-------------------|--------|-------------------|--------|
| 1/8/2011 09:04:01 | 27.689 | 1/6/2011 15:39:01 | 27.072 |
| 1/8/2011 09:24:01 | 28.563 | 1/6/2011 15:59:01 | 27.072 |
| 1/8/2011 09:44:01 | 30.061 | 1/6/2011 16:19:01 | 27.072 |
| 1/8/2011 10:04:01 | 31.309 | 1/6/2011 16:39:01 | 27.134 |
| 1/8/2011 10:24:01 | 31.746 | 1/6/2011 16:59:01 | 27.134 |
| 1/8/2011 10:44:01 | 30.061 | 1/6/2011 17:19:01 | 27.197 |
| 1/8/2011 11:04:01 | 29.374 | 1/6/2011 17:39:01 | 27.197 |
| 1/8/2011 11:24:01 | 31.933 | 1/6/2011 17:59:01 | 27.197 |
| 1/8/2011 11:44:01 | 33.180 | 1/6/2011 18:19:01 | 27.259 |
| 1/8/2011 12:04:01 | 31.059 | 1/6/2011 18:39:01 | 27.259 |
| 1/8/2011 12:24:01 | 32.120 | 1/6/2011 18:59:01 | 27.259 |
| 1/8/2011 12:44:01 | 31.933 | 1/6/2011 19:19:01 | 27.321 |
| 1/8/2011 13:04:01 | 31.995 | 1/6/2011 19:39:01 | 27.321 |
| 1/8/2011 13:24:01 | 30.560 | 1/6/2011 19:59:01 | 27.321 |
| 1/8/2011 13:44:01 | 33.803 | 1/6/2011 20:19:01 | 27.321 |
| 1/8/2011 14:04:01 | 34.801 | 1/6/2011 20:39:01 | 27.321 |
| 1/8/2011 14:24:01 | 34.738 | 1/6/2011 20:59:01 | 27.321 |
| 1/8/2011 14:44:01 | 32.806 | 1/6/2011 21:19:01 | 27.384 |
| 1/8/2011 15:04:01 | 31.933 | 1/6/2011 21:39:01 | 27.384 |
| 1/8/2011 15:24:01 | 30.810 | 1/6/2011 21:59:01 | 27.384 |
| 1/8/2011 15:44:01 | 30.435 | 1/6/2011 22:19:01 | 27.384 |
| 1/8/2011 16:04:01 | 30.810 | 1/6/2011 22:39:01 | 27.384 |
| 1/8/2011 16:24:01 | 30.498 | 1/6/2011 22:59:01 | 27.384 |
| 1/8/2011 16:44:01 | 29.874 | 1/6/2011 23:19:01 | 27.321 |
| 1/8/2011 17:04:01 | 29.250 | 1/6/2011 23:39:01 | 27.321 |
| 1/8/2011 17:24:01 | 29.125 | 1/6/2011 23:59:01 | 27.321 |
| 1/8/2011 17:44:01 | 28.937 | 1/7/2011 00:19:01 | 27.321 |
| 1/8/2011 18:04:01 | 28.563 | 1/7/2011 00:39:01 | 27.321 |
| 1/8/2011 18:24:01 | 28.500 | 1/7/2011 00:59:01 | 27.321 |
| 1/8/2011 18:44:01 | 28.001 | 1/7/2011 01:19:01 | 27.321 |
| 1/8/2011 19:04:01 | 27.564 | 1/7/2011 01:39:01 | 27.321 |
| 1/8/2011 19:24:01 | 27.189 | 1/7/2011 01:59:01 | 27.321 |
| 1/8/2011 19:44:01 | 26.939 | 1/7/2011 02:19:01 | 27.259 |
| 1/8/2011 20:04:01 | 26.752 | 1/7/2011 02:39:01 | 27.259 |
| 1/8/2011 20:24:01 | 26.627 | 1/7/2011 02:59:01 | 27.259 |
| 1/8/2011 20:44:01 | 26.439 | 1/7/2011 03:19:01 | 27.259 |
| 1/8/2011 21:04:01 | 26.314 | 1/7/2011 03:39:01 | 27.259 |
| 1/8/2011 21:24:01 | 26.002 | 1/7/2011 03:59:01 | 27.197 |
| 1/8/2011 21:44:01 | 25.752 | 1/7/2011 04:19:01 | 27.197 |
| 1/8/2011 22:04:01 | 25.752 | 1/7/2011 04:39:01 | 27.197 |
| 1/8/2011 22:24:01 | 25.877 | 1/7/2011 04:59:01 | 27.197 |
| 1/8/2011 22:44:01 | 25.377 | 1/7/2011 05:19:01 | 27.197 |
| 1/8/2011 23:04:01 | 24.502 | 1/7/2011 05:39:01 | 27.134 |
| 1/8/2011 23:24:01 | 23.939 | 1/7/2011 05:59:01 | 27.134 |
| 1/8/2011 23:44:01 | 23.251 | 1/7/2011 06:19:01 | 27.134 |
| 1/9/2011 00:04:01 | 23.064 | 1/7/2011 06:39:01 | 27.134 |
| 1/9/2011 00:24:01 | 23.189 | 1/7/2011 06:59:01 | 27.072 |
| 1/9/2011 00:44:01 | 23.376 | 1/7/2011 07:19:01 | 27.072 |
| 1/9/2011 01:04:01 | 23.251 | 1/7/2011 07:39:01 | 27.072 |
| 1/9/2011 01:24:01 | 23.064 | 1/7/2011 07:59:01 | 27.072 |

|                   |        |                   |        |
|-------------------|--------|-------------------|--------|
| 1/9/2011 01:44:01 | 22.751 | 1/7/2011 08:19:01 | 27.009 |
| 1/9/2011 02:04:01 | 22.626 | 1/7/2011 08:39:01 | 27.009 |
| 1/9/2011 02:24:01 | 22.501 | 1/7/2011 08:59:01 | 27.009 |
| 1/9/2011 02:44:01 | 22.376 | 1/7/2011 09:19:01 | 26.947 |
| 1/9/2011 03:04:01 | 22.438 | 1/7/2011 09:39:01 | 26.947 |
| 1/9/2011 03:24:01 | 22.563 | 1/7/2011 09:59:01 | 26.947 |
| 1/9/2011 03:44:01 | 22.626 | 1/7/2011 10:19:01 | 26.947 |
| 1/9/2011 04:04:01 | 22.751 | 1/7/2011 10:39:01 | 26.947 |
| 1/9/2011 04:24:01 | 23.001 | 1/7/2011 10:59:01 | 26.884 |
| 1/9/2011 04:44:01 | 23.126 | 1/7/2011 11:19:01 | 26.884 |
| 1/9/2011 05:04:01 | 23.126 | 1/7/2011 11:39:01 | 26.884 |
| 1/9/2011 05:24:01 | 23.126 | 1/7/2011 11:59:01 | 26.884 |
| 1/9/2011 05:44:01 | 23.064 | 1/7/2011 12:19:01 | 26.884 |
| 1/9/2011 06:04:01 | 23.126 | 1/7/2011 12:39:01 | 26.884 |
| 1/9/2011 06:24:01 | 23.376 | 1/7/2011 12:59:01 | 26.884 |
| 1/9/2011 06:44:01 | 23.501 | 1/7/2011 13:19:01 | 26.884 |
| 1/9/2011 07:04:01 | 23.627 | 1/7/2011 13:39:01 | 26.947 |
| 1/9/2011 07:24:01 | 24.002 | 1/7/2011 13:59:01 | 26.947 |
| 1/9/2011 07:44:01 | 24.377 | 1/7/2011 14:19:01 | 26.947 |
| 1/9/2011 08:04:01 | 25.252 | 1/7/2011 14:39:01 | 26.947 |
| 1/9/2011 08:24:01 | 26.189 | 1/7/2011 14:59:01 | 26.947 |
| 1/9/2011 08:44:01 | 26.814 | 1/7/2011 15:19:01 | 27.009 |
| 1/9/2011 09:04:01 | 27.376 | 1/7/2011 15:39:01 | 27.009 |
| 1/9/2011 09:24:01 | 28.126 | 1/7/2011 15:59:01 | 27.009 |
| 1/9/2011 09:44:01 | 30.123 | 1/7/2011 16:19:01 | 27.072 |
| 1/9/2011 10:04:01 | 30.311 | 1/7/2011 16:39:01 | 27.072 |
| 1/9/2011 10:24:01 | 30.435 | 1/7/2011 16:59:01 | 27.072 |
| 1/9/2011 10:44:01 | 31.122 | 1/7/2011 17:19:01 | 27.134 |
| 1/9/2011 11:04:01 | 30.186 | 1/7/2011 17:39:01 | 27.134 |
| 1/9/2011 11:24:01 | 31.621 | 1/7/2011 17:59:01 | 27.197 |
| 1/9/2011 11:44:01 | 31.621 | 1/7/2011 18:19:01 | 27.197 |
| 1/9/2011 12:04:01 | 31.247 | 1/7/2011 18:39:01 | 27.197 |
| 1/9/2011 12:24:01 | 30.186 | 1/7/2011 18:59:01 | 27.259 |
| 1/9/2011 12:44:01 | 31.621 | 1/7/2011 19:19:01 | 27.259 |
| 1/9/2011 13:04:01 | 33.554 | 1/7/2011 19:39:01 | 27.259 |
| 1/9/2011 13:24:01 | 33.055 | 1/7/2011 19:59:01 | 27.259 |
| 1/9/2011 13:44:01 | 31.621 | 1/7/2011 20:19:01 | 27.259 |
| 1/9/2011 14:04:01 | 32.619 | 1/7/2011 20:39:01 | 27.321 |
| 1/9/2011 14:24:01 | 32.931 | 1/7/2011 20:59:01 | 27.321 |
| 1/9/2011 14:44:01 | 32.993 | 1/7/2011 21:19:01 | 27.321 |
| 1/9/2011 15:04:01 | 33.679 | 1/7/2011 21:39:01 | 27.321 |
| 1/9/2011 15:24:01 | 32.681 | 1/7/2011 21:59:01 | 27.321 |
| 1/9/2011 15:44:01 | 31.995 | 1/7/2011 22:19:01 | 27.321 |
| 1/9/2011 16:04:01 | 31.621 | 1/7/2011 22:39:01 | 27.321 |
| 1/9/2011 16:24:01 | 31.184 | 1/7/2011 22:59:01 | 27.321 |
| 1/9/2011 16:44:01 | 30.685 | 1/7/2011 23:19:01 | 27.321 |
| 1/9/2011 17:04:01 | 30.248 | 1/7/2011 23:39:01 | 27.321 |
| 1/9/2011 17:24:01 | 29.437 | 1/7/2011 23:59:01 | 27.321 |
| 1/9/2011 17:44:01 | 29.687 | 1/8/2011 00:19:01 | 27.321 |
| 1/9/2011 18:04:01 | 29.437 | 1/8/2011 00:39:01 | 27.259 |

|                    |        |                   |        |
|--------------------|--------|-------------------|--------|
| 1/9/2011 18:24:01  | 28.937 | 1/8/2011 00:59:01 | 27.259 |
| 1/9/2011 18:44:01  | 28.500 | 1/8/2011 01:19:01 | 27.259 |
| 1/9/2011 19:04:01  | 28.126 | 1/8/2011 01:39:01 | 27.259 |
| 1/9/2011 19:24:01  | 27.751 | 1/8/2011 01:59:01 | 27.259 |
| 1/9/2011 19:44:01  | 27.439 | 1/8/2011 02:19:01 | 27.259 |
| 1/9/2011 20:04:01  | 27.251 | 1/8/2011 02:39:01 | 27.259 |
| 1/9/2011 20:24:01  | 27.002 | 1/8/2011 02:59:01 | 27.259 |
| 1/9/2011 20:44:01  | 26.627 | 1/8/2011 03:19:01 | 27.197 |
| 1/9/2011 21:04:01  | 26.127 | 1/8/2011 03:39:01 | 27.197 |
| 1/9/2011 21:24:01  | 26.002 | 1/8/2011 03:59:01 | 27.197 |
| 1/9/2011 21:44:01  | 25.752 | 1/8/2011 04:19:01 | 27.197 |
| 1/9/2011 22:04:01  | 25.189 | 1/8/2011 04:39:01 | 27.197 |
| 1/9/2011 22:24:01  | 24.939 | 1/8/2011 04:59:01 | 27.197 |
| 1/9/2011 22:44:01  | 24.939 | 1/8/2011 05:19:01 | 27.134 |
| 1/9/2011 23:04:01  | 24.814 | 1/8/2011 05:39:01 | 27.134 |
| 1/9/2011 23:24:01  | 24.814 | 1/8/2011 05:59:01 | 27.134 |
| 1/9/2011 23:44:01  | 24.939 | 1/8/2011 06:19:01 | 27.134 |
| 1/10/2011 00:04:01 | 25.002 | 1/8/2011 06:39:01 | 27.134 |
| 1/10/2011 00:24:01 | 25.127 | 1/8/2011 06:59:01 | 27.072 |
| 1/10/2011 00:44:01 | 25.127 | 1/8/2011 07:19:01 | 27.072 |
| 1/10/2011 01:04:01 | 25.127 | 1/8/2011 07:39:01 | 27.072 |
| 1/10/2011 01:24:01 | 25.002 | 1/8/2011 07:59:01 | 27.072 |
| 1/10/2011 01:44:01 | 23.439 | 1/8/2011 08:19:01 | 27.072 |
| 1/10/2011 02:04:01 | 22.814 | 1/8/2011 08:39:01 | 27.009 |
| 1/10/2011 02:24:01 | 22.626 | 1/8/2011 08:59:01 | 27.009 |
| 1/10/2011 02:44:01 | 22.563 | 1/8/2011 09:19:01 | 27.009 |
| 1/10/2011 03:04:01 | 22.438 | 1/8/2011 09:39:01 | 27.009 |
| 1/10/2011 03:24:01 | 22.251 | 1/8/2011 09:59:01 | 27.009 |
| 1/10/2011 03:44:01 | 22.188 | 1/8/2011 10:19:01 | 26.947 |
| 1/10/2011 04:04:01 | 22.376 | 1/8/2011 10:39:01 | 26.947 |
| 1/10/2011 04:24:01 | 22.313 | 1/8/2011 10:59:01 | 26.947 |
| 1/10/2011 04:44:01 | 22.125 | 1/8/2011 11:19:01 | 26.947 |
| 1/10/2011 05:04:01 | 21.938 | 1/8/2011 11:39:01 | 26.947 |
| 1/10/2011 05:24:01 | 21.938 | 1/8/2011 11:59:01 | 26.947 |
| 1/10/2011 05:44:01 | 21.875 | 1/8/2011 12:19:01 | 26.947 |
| 1/10/2011 06:04:01 | 21.938 | 1/8/2011 12:39:01 | 27.009 |
| 1/10/2011 06:24:01 | 22.313 | 1/8/2011 12:59:01 | 27.009 |
| 1/10/2011 06:44:01 | 23.126 | 1/8/2011 13:19:01 | 27.009 |
| 1/10/2011 07:04:01 | 23.627 | 1/8/2011 13:39:01 | 27.009 |
| 1/10/2011 07:24:01 | 24.127 | 1/8/2011 13:59:01 | 27.009 |
| 1/10/2011 07:44:01 | 24.877 | 1/8/2011 14:19:01 | 27.072 |
| 1/10/2011 08:04:01 | 25.627 | 1/8/2011 14:39:01 | 27.072 |
| 1/10/2011 08:24:01 | 25.814 | 1/8/2011 14:59:01 | 27.072 |
| 1/10/2011 08:44:01 | 26.377 | 1/8/2011 15:19:01 | 27.072 |
| 1/10/2011 09:04:01 | 26.564 | 1/8/2011 15:39:01 | 27.134 |
| 1/10/2011 09:24:01 | 27.126 | 1/8/2011 15:59:01 | 27.134 |
| 1/10/2011 09:44:01 | 27.501 | 1/8/2011 16:19:01 | 27.197 |
| 1/10/2011 10:04:01 | 27.002 | 1/8/2011 16:39:01 | 27.197 |
| 1/10/2011 10:24:01 | 27.439 | 1/8/2011 16:59:01 | 27.197 |
| 1/10/2011 10:44:01 | 27.751 | 1/8/2011 17:19:01 | 27.259 |

|                    |        |                   |        |
|--------------------|--------|-------------------|--------|
| 1/10/2011 11:04:01 | 28.500 | 1/8/2011 17:39:01 | 27.259 |
| 1/10/2011 11:24:01 | 29.874 | 1/8/2011 17:59:01 | 27.259 |
| 1/10/2011 11:44:01 | 29.687 | 1/8/2011 18:19:01 | 27.321 |
| 1/10/2011 12:04:01 | 31.496 | 1/8/2011 18:39:01 | 27.321 |
| 1/10/2011 12:24:01 | 32.432 | 1/8/2011 18:59:01 | 27.321 |
| 1/10/2011 12:44:01 | 32.556 | 1/8/2011 19:19:01 | 27.321 |
| 1/10/2011 13:04:01 | 33.242 | 1/8/2011 19:39:01 | 27.384 |
| 1/10/2011 13:24:01 | 33.679 | 1/8/2011 19:59:01 | 27.384 |
| 1/10/2011 13:44:01 | 33.367 | 1/8/2011 20:19:01 | 27.384 |
| 1/10/2011 14:04:01 | 32.182 | 1/8/2011 20:39:01 | 27.384 |
| 1/10/2011 14:24:01 | 32.993 | 1/8/2011 20:59:01 | 27.384 |
| 1/10/2011 14:44:01 | 33.990 | 1/8/2011 21:19:01 | 27.384 |
| 1/10/2011 15:04:01 | 33.679 | 1/8/2011 21:39:01 | 27.384 |
| 1/10/2011 15:24:01 | 32.619 | 1/8/2011 21:59:01 | 27.384 |
| 1/10/2011 15:44:01 | 31.933 | 1/8/2011 22:19:01 | 27.384 |
| 1/10/2011 16:04:01 | 30.560 | 1/8/2011 22:39:01 | 27.384 |
| 1/10/2011 16:24:01 | 30.248 | 1/8/2011 22:59:01 | 27.384 |
| 1/10/2011 16:44:01 | 29.374 | 1/8/2011 23:19:01 | 27.384 |
| 1/10/2011 17:04:01 | 28.376 | 1/8/2011 23:39:01 | 27.384 |
| 1/10/2011 17:24:01 | 27.813 | 1/8/2011 23:59:01 | 27.384 |
| 1/10/2011 17:44:01 | 27.126 | 1/9/2011 00:19:01 | 27.384 |
| 1/10/2011 18:04:01 | 26.564 | 1/9/2011 00:39:01 | 27.384 |
| 1/10/2011 18:24:01 | 25.939 | 1/9/2011 00:59:01 | 27.384 |
| 1/10/2011 18:44:01 | 25.439 | 1/9/2011 01:19:01 | 27.384 |
| 1/10/2011 19:04:01 | 25.002 | 1/9/2011 01:39:01 | 27.384 |
| 1/10/2011 19:24:01 | 24.564 | 1/9/2011 01:59:01 | 27.384 |
| 1/10/2011 19:44:01 | 24.314 | 1/9/2011 02:19:01 | 27.384 |
| 1/10/2011 20:04:01 | 24.314 | 1/9/2011 02:39:01 | 27.321 |
| 1/10/2011 20:24:01 | 24.189 | 1/9/2011 02:59:01 | 27.321 |
| 1/10/2011 20:44:01 | 24.064 | 1/9/2011 03:19:01 | 27.321 |
| 1/10/2011 21:04:01 | 23.814 | 1/9/2011 03:39:01 | 27.321 |
| 1/10/2011 21:24:01 | 23.689 | 1/9/2011 03:59:01 | 27.321 |
| 1/10/2011 21:44:01 | 23.752 | 1/9/2011 04:19:01 | 27.259 |
| 1/10/2011 22:04:01 | 23.627 | 1/9/2011 04:39:01 | 27.259 |
| 1/10/2011 22:24:01 | 23.564 | 1/9/2011 04:59:01 | 27.259 |
| 1/10/2011 22:44:01 | 23.501 | 1/9/2011 05:19:01 | 27.259 |
| 1/10/2011 23:04:01 | 23.564 | 1/9/2011 05:39:01 | 27.197 |
| 1/10/2011 23:24:01 | 23.564 | 1/9/2011 05:59:01 | 27.197 |
| 1/10/2011 23:44:01 | 23.564 | 1/9/2011 06:19:01 | 27.197 |
| 1/11/2011 00:04:01 | 23.564 | 1/9/2011 06:39:01 | 27.197 |
| 1/11/2011 00:24:01 | 23.501 | 1/9/2011 06:59:01 | 27.197 |
| 1/11/2011 00:44:01 | 23.439 | 1/9/2011 07:19:01 | 27.134 |
| 1/11/2011 01:04:01 | 23.564 | 1/9/2011 07:39:01 | 27.134 |
| 1/11/2011 01:24:01 | 23.564 | 1/9/2011 07:59:01 | 27.134 |
| 1/11/2011 01:44:01 | 23.752 | 1/9/2011 08:19:01 | 27.134 |
| 1/11/2011 02:04:01 | 23.814 | 1/9/2011 08:39:01 | 27.072 |
| 1/11/2011 02:24:01 | 23.877 | 1/9/2011 08:59:01 | 27.072 |
| 1/11/2011 02:44:01 | 24.002 | 1/9/2011 09:19:01 | 27.072 |
| 1/11/2011 03:04:01 | 24.002 | 1/9/2011 09:39:01 | 27.072 |
| 1/11/2011 03:24:01 | 23.752 | 1/9/2011 09:59:01 | 27.072 |

|                    |        |                    |        |
|--------------------|--------|--------------------|--------|
| 1/11/2011 03:44:01 | 23.689 | 1/9/2011 10:19:01  | 27.009 |
| 1/11/2011 04:04:01 | 23.752 | 1/9/2011 10:39:01  | 27.009 |
| 1/11/2011 04:24:01 | 23.814 | 1/9/2011 10:59:01  | 27.009 |
| 1/11/2011 04:44:01 | 23.752 | 1/9/2011 11:19:01  | 27.009 |
| 1/11/2011 05:04:01 | 23.752 | 1/9/2011 11:39:01  | 27.009 |
| 1/11/2011 05:24:01 | 23.564 | 1/9/2011 11:59:01  | 27.009 |
| 1/11/2011 05:44:01 | 23.627 | 1/9/2011 12:19:01  | 27.009 |
| 1/11/2011 06:04:01 | 23.814 | 1/9/2011 12:39:01  | 27.009 |
| 1/11/2011 06:24:01 | 24.314 | 1/9/2011 12:59:01  | 27.009 |
| 1/11/2011 06:44:01 | 24.877 | 1/9/2011 13:19:01  | 27.072 |
| 1/11/2011 07:04:01 | 25.502 | 1/9/2011 13:39:01  | 27.072 |
| 1/11/2011 07:24:01 | 26.189 | 1/9/2011 13:59:01  | 27.072 |
| 1/11/2011 07:44:01 | 27.251 | 1/9/2011 14:19:01  | 27.072 |
| 1/11/2011 08:04:01 | 27.501 | 1/9/2011 14:39:01  | 27.072 |
| 1/11/2011 08:24:01 | 27.002 | 1/9/2011 14:59:01  | 27.134 |
| 1/11/2011 08:44:01 | 28.063 | 1/9/2011 15:19:01  | 27.134 |
| 1/11/2011 09:04:01 | 28.313 | 1/9/2011 15:39:01  | 27.134 |
| 1/11/2011 09:24:01 | 29.312 | 1/9/2011 15:59:01  | 27.134 |
| 1/11/2011 09:44:01 | 31.621 | 1/9/2011 16:19:01  | 27.197 |
| 1/11/2011 10:04:01 | 31.870 | 1/9/2011 16:39:01  | 27.197 |
| 1/11/2011 10:24:01 | 31.496 | 1/9/2011 16:59:01  | 27.197 |
| 1/11/2011 10:44:01 | 32.307 | 1/9/2011 17:19:01  | 27.259 |
| 1/11/2011 11:04:01 | 32.931 | 1/9/2011 17:39:01  | 27.259 |
| 1/11/2011 11:24:01 | 33.492 | 1/9/2011 17:59:01  | 27.321 |
| 1/11/2011 11:44:01 | 33.990 | 1/9/2011 18:19:01  | 27.321 |
| 1/11/2011 12:04:01 | 34.489 | 1/9/2011 18:39:01  | 27.321 |
| 1/11/2011 12:24:01 | 35.237 | 1/9/2011 18:59:01  | 27.321 |
| 1/11/2011 12:44:01 | 35.798 | 1/9/2011 19:19:01  | 27.384 |
| 1/11/2011 13:04:01 | 35.984 | 1/9/2011 19:39:01  | 27.384 |
| 1/11/2011 13:24:01 | 35.237 | 1/9/2011 19:59:01  | 27.384 |
| 1/11/2011 13:44:01 | 35.424 | 1/9/2011 20:19:01  | 27.446 |
| 1/11/2011 14:04:01 | 34.614 | 1/9/2011 20:39:01  | 27.446 |
| 1/11/2011 14:24:01 | 31.746 | 1/9/2011 20:59:01  | 27.446 |
| 1/11/2011 14:44:01 | 32.494 | 1/9/2011 21:19:01  | 27.446 |
| 1/11/2011 15:04:01 | 34.427 | 1/9/2011 21:39:01  | 27.446 |
| 1/11/2011 15:24:01 | 33.616 | 1/9/2011 21:59:01  | 27.446 |
| 1/11/2011 15:44:01 | 33.180 | 1/9/2011 22:19:01  | 27.446 |
| 1/11/2011 16:04:01 | 32.743 | 1/9/2011 22:39:01  | 27.446 |
| 1/11/2011 16:24:01 | 32.120 | 1/9/2011 22:59:01  | 27.446 |
| 1/11/2011 16:44:01 | 31.621 | 1/9/2011 23:19:01  | 27.446 |
| 1/11/2011 17:04:01 | 31.247 | 1/9/2011 23:39:01  | 27.446 |
| 1/11/2011 17:24:01 | 30.560 | 1/9/2011 23:59:01  | 27.446 |
| 1/11/2011 17:44:01 | 29.811 | 1/10/2011 00:19:01 | 27.446 |
| 1/11/2011 18:04:01 | 29.125 | 1/10/2011 00:39:01 | 27.446 |
| 1/11/2011 18:24:01 | 28.438 | 1/10/2011 00:59:01 | 27.446 |
| 1/11/2011 18:44:01 | 27.751 | 1/10/2011 01:19:01 | 27.446 |
| 1/11/2011 19:04:01 | 27.126 | 1/10/2011 01:39:01 | 27.446 |
| 1/11/2011 19:24:01 | 26.814 | 1/10/2011 01:59:01 | 27.446 |
| 1/11/2011 19:44:01 | 26.877 | 1/10/2011 02:19:01 | 27.384 |
| 1/11/2011 20:04:01 | 27.064 | 1/10/2011 02:39:01 | 27.384 |

|                    |        |                    |        |
|--------------------|--------|--------------------|--------|
| 1/11/2011 20:24:01 | 27.126 | 1/10/2011 02:59:01 | 27.384 |
| 1/11/2011 20:44:01 | 26.564 | 1/10/2011 03:19:01 | 27.321 |
| 1/11/2011 21:04:01 | 26.127 | 1/10/2011 03:39:01 | 27.321 |
| 1/11/2011 21:24:01 | 25.877 | 1/10/2011 03:59:01 | 27.259 |
| 1/11/2011 21:44:01 | 25.564 | 1/10/2011 04:19:01 | 27.197 |
| 1/11/2011 22:04:01 | 25.252 | 1/10/2011 04:39:01 | 27.197 |
| 1/11/2011 22:24:01 | 25.002 | 1/10/2011 04:59:01 | 27.134 |
| 1/11/2011 22:44:01 | 25.064 | 1/10/2011 05:19:01 | 27.134 |
| 1/11/2011 23:04:01 | 25.127 | 1/10/2011 05:39:01 | 27.072 |
| 1/11/2011 23:24:01 | 25.064 | 1/10/2011 05:59:01 | 27.072 |
| 1/11/2011 23:44:01 | 25.002 | 1/10/2011 06:19:01 | 27.009 |
| 1/12/2011 00:04:01 | 25.189 | 1/10/2011 06:39:01 | 27.009 |
| 1/12/2011 00:24:01 | 25.689 | 1/10/2011 06:59:01 | 27.009 |
| 1/12/2011 00:44:01 | 25.064 | 1/10/2011 07:19:01 | 26.947 |
| 1/12/2011 01:04:01 | 23.189 | 1/10/2011 07:39:01 | 26.947 |
| 1/12/2011 01:24:01 | 22.751 | 1/10/2011 07:59:01 | 26.884 |
| 1/12/2011 01:44:01 | 22.626 | 1/10/2011 08:19:01 | 26.884 |
| 1/12/2011 02:04:01 | 22.438 | 1/10/2011 08:39:01 | 26.884 |
| 1/12/2011 02:24:01 | 22.501 | 1/10/2011 08:59:01 | 26.884 |
| 1/12/2011 02:44:01 | 22.251 | 1/10/2011 09:19:01 | 26.822 |
| 1/12/2011 03:04:01 | 22.313 | 1/10/2011 09:39:01 | 26.822 |
| 1/12/2011 03:24:01 | 22.313 | 1/10/2011 09:59:01 | 26.822 |
| 1/12/2011 03:44:01 | 22.376 | 1/10/2011 10:19:01 | 26.822 |
| 1/12/2011 04:04:01 | 22.313 | 1/10/2011 10:39:01 | 26.822 |
| 1/12/2011 04:24:01 | 22.376 | 1/10/2011 10:59:01 | 26.822 |
| 1/12/2011 04:44:01 | 22.438 | 1/10/2011 11:19:01 | 26.759 |
| 1/12/2011 05:04:01 | 22.563 | 1/10/2011 11:39:01 | 26.759 |
| 1/12/2011 05:24:01 | 22.688 | 1/10/2011 11:59:01 | 26.759 |
| 1/12/2011 05:44:01 | 22.751 | 1/10/2011 12:19:01 | 26.822 |
| 1/12/2011 06:04:01 | 22.876 | 1/10/2011 12:39:01 | 26.759 |
| 1/12/2011 06:24:01 | 23.189 | 1/10/2011 12:59:01 | 26.822 |
| 1/12/2011 06:44:01 | 23.564 | 1/10/2011 13:19:01 | 26.822 |
| 1/12/2011 07:04:01 | 24.002 | 1/10/2011 13:39:01 | 26.822 |
| 1/12/2011 07:24:01 | 24.189 | 1/10/2011 13:59:01 | 26.822 |
| 1/12/2011 07:44:01 | 24.939 | 1/10/2011 14:19:01 | 26.822 |
| 1/12/2011 08:04:01 | 25.314 | 1/10/2011 14:39:01 | 26.822 |
| 1/12/2011 08:24:01 | 25.752 | 1/10/2011 14:59:01 | 26.884 |
| 1/12/2011 08:44:01 | 26.127 | 1/10/2011 15:19:01 | 26.884 |
| 1/12/2011 09:04:01 | 26.814 | 1/10/2011 15:39:01 | 26.884 |
| 1/12/2011 09:24:01 | 26.939 | 1/10/2011 15:59:01 | 26.884 |
| 1/12/2011 09:44:01 | 28.188 | 1/10/2011 16:19:01 | 26.947 |
| 1/12/2011 10:04:01 | 29.125 | 1/10/2011 16:39:01 | 26.947 |
| 1/12/2011 10:24:01 | 29.125 | 1/10/2011 16:59:01 | 26.947 |
| 1/12/2011 10:44:01 | 28.688 | 1/10/2011 17:19:01 | 27.009 |
| 1/12/2011 11:04:01 | 28.750 | 1/10/2011 17:39:01 | 27.009 |
| 1/12/2011 11:24:01 | 31.059 | 1/10/2011 17:59:01 | 27.072 |
| 1/12/2011 11:44:01 | 29.250 | 1/10/2011 18:19:01 | 27.072 |
| 1/12/2011 12:04:01 | 30.435 | 1/10/2011 18:39:01 | 27.072 |
| 1/12/2011 12:24:01 | 31.371 | 1/10/2011 18:59:01 | 27.134 |
| 1/12/2011 12:44:01 | 32.619 | 1/10/2011 19:19:01 | 27.134 |



|                    |        |                    |        |
|--------------------|--------|--------------------|--------|
| 1/12/2011 13:04:01 | 32.494 | 1/10/2011 19:39:01 | 27.134 |
| 1/12/2011 13:24:01 | 32.120 | 1/10/2011 19:59:01 | 27.134 |
| 1/12/2011 13:44:01 | 33.803 | 1/10/2011 20:19:01 | 27.197 |
| 1/12/2011 14:04:01 | 30.560 | 1/10/2011 20:39:01 | 27.197 |
| 1/12/2011 14:24:01 | 30.935 | 1/10/2011 20:59:01 | 27.197 |
| 1/12/2011 14:44:01 | 30.311 | 1/10/2011 21:19:01 | 27.197 |
| 1/12/2011 15:04:01 | 31.933 | 1/10/2011 21:39:01 | 27.197 |
| 1/12/2011 15:24:01 | 30.560 | 1/10/2011 21:59:01 | 27.197 |
| 1/12/2011 15:44:01 | 30.311 | 1/10/2011 22:19:01 | 27.197 |
| 1/12/2011 16:04:01 | 30.248 | 1/10/2011 22:39:01 | 27.197 |
| 1/12/2011 16:24:01 | 29.187 | 1/10/2011 22:59:01 | 27.197 |
| 1/12/2011 16:44:01 | 28.937 | 1/10/2011 23:19:01 | 27.197 |
| 1/12/2011 17:04:01 | 28.813 | 1/10/2011 23:39:01 | 27.197 |
| 1/12/2011 17:24:01 | 28.625 | 1/10/2011 23:59:01 | 27.197 |
| 1/12/2011 17:44:01 | 28.188 | 1/11/2011 00:19:01 | 27.134 |
| 1/12/2011 18:04:01 | 27.689 | 1/11/2011 00:39:01 | 27.134 |
| 1/12/2011 18:24:01 | 27.189 | 1/11/2011 00:59:01 | 27.134 |
| 1/12/2011 18:44:01 | 26.627 | 1/11/2011 01:19:01 | 27.134 |
| 1/12/2011 19:04:01 | 26.252 | 1/11/2011 01:39:01 | 27.134 |
| 1/12/2011 19:24:01 | 25.877 | 1/11/2011 01:59:01 | 27.134 |
| 1/12/2011 19:44:01 | 25.439 | 1/11/2011 02:19:01 | 27.134 |
| 1/12/2011 20:04:01 | 25.127 | 1/11/2011 02:39:01 | 27.134 |
| 1/12/2011 20:24:01 | 24.877 | 1/11/2011 02:59:01 | 27.072 |
| 1/12/2011 20:44:01 | 24.814 | 1/11/2011 03:19:01 | 27.072 |
| 1/12/2011 21:04:01 | 24.689 | 1/11/2011 03:39:01 | 27.072 |
| 1/12/2011 21:24:01 | 24.814 | 1/11/2011 03:59:01 | 27.072 |
| 1/12/2011 21:44:01 | 25.002 | 1/11/2011 04:19:01 | 27.072 |
| 1/12/2011 22:04:01 | 25.064 | 1/11/2011 04:39:01 | 27.072 |
| 1/12/2011 22:24:01 | 25.002 | 1/11/2011 04:59:01 | 27.009 |
| 1/12/2011 22:44:01 | 24.939 | 1/11/2011 05:19:01 | 27.009 |
| 1/12/2011 23:04:01 | 25.127 | 1/11/2011 05:39:01 | 27.009 |
| 1/12/2011 23:24:01 | 25.252 | 1/11/2011 05:59:01 | 27.009 |
| 1/12/2011 23:44:01 | 25.252 | 1/11/2011 06:19:01 | 27.009 |
| 1/13/2011 00:04:01 | 21.687 | 1/11/2011 06:39:01 | 27.009 |
| 1/13/2011 00:24:01 | 21.500 | 1/11/2011 06:59:01 | 27.009 |
| 1/13/2011 00:44:01 | 21.562 | 1/11/2011 07:19:01 | 27.009 |
| 1/13/2011 01:04:01 | 21.813 | 1/11/2011 07:39:01 | 26.947 |
| 1/13/2011 01:24:01 | 21.875 | 1/11/2011 07:59:01 | 26.947 |
| 1/13/2011 01:44:01 | 21.938 | 1/11/2011 08:19:01 | 26.947 |
| 1/13/2011 02:04:01 | 21.938 | 1/11/2011 08:39:01 | 26.947 |
| 1/13/2011 02:24:01 | 21.875 | 1/11/2011 08:59:01 | 26.947 |
| 1/13/2011 02:44:01 | 21.813 | 1/11/2011 09:19:01 | 26.947 |
| 1/13/2011 03:04:01 | 21.875 | 1/11/2011 09:39:01 | 26.947 |
| 1/13/2011 03:24:01 | 21.813 | 1/11/2011 09:59:01 | 26.947 |
| 1/13/2011 03:44:01 | 21.875 | 1/11/2011 10:19:01 | 26.947 |
| 1/13/2011 04:04:01 | 21.875 | 1/11/2011 10:39:01 | 26.947 |
| 1/13/2011 04:24:01 | 21.875 | 1/11/2011 10:59:01 | 26.947 |
| 1/13/2011 04:44:01 | 21.813 | 1/11/2011 11:19:01 | 26.947 |
| 1/13/2011 05:04:01 | 21.750 | 1/11/2011 11:39:01 | 26.947 |
| 1/13/2011 05:24:01 | 21.750 | 1/11/2011 11:59:01 | 26.947 |

|                    |        |                    |        |
|--------------------|--------|--------------------|--------|
| 1/13/2011 05:44:01 | 21.813 | 1/11/2011 12:19:01 | 26.947 |
| 1/13/2011 06:04:01 | 22.063 | 1/11/2011 12:39:01 | 26.947 |
| 1/13/2011 06:24:01 | 22.626 | 1/11/2011 12:59:01 | 26.947 |
| 1/13/2011 06:44:01 | 23.314 | 1/11/2011 13:19:01 | 26.947 |
| 1/13/2011 07:04:01 | 23.752 | 1/11/2011 13:39:01 | 26.947 |
| 1/13/2011 07:24:01 | 24.377 | 1/11/2011 13:59:01 | 27.009 |
| 1/13/2011 07:44:01 | 25.189 | 1/11/2011 14:19:01 | 27.009 |
| 1/13/2011 08:04:01 | 25.689 | 1/11/2011 14:39:01 | 27.009 |
| 1/13/2011 08:24:01 | 26.189 | 1/11/2011 14:59:01 | 27.072 |
| 1/13/2011 08:44:01 | 25.814 | 1/11/2011 15:19:01 | 27.072 |
| 1/13/2011 09:04:01 | 26.502 | 1/11/2011 15:39:01 | 27.072 |
| 1/13/2011 09:24:01 | 26.252 | 1/11/2011 15:59:01 | 27.134 |
| 1/13/2011 09:44:01 | 28.688 | 1/11/2011 16:19:01 | 27.134 |
| 1/13/2011 10:04:01 | 29.437 | 1/11/2011 16:39:01 | 27.134 |
| 1/13/2011 10:24:01 | 27.064 | 1/11/2011 16:59:01 | 27.197 |
| 1/13/2011 10:44:01 | 27.501 | 1/11/2011 17:19:01 | 27.197 |
| 1/13/2011 11:04:01 | 29.187 | 1/11/2011 17:39:01 | 27.197 |
| 1/13/2011 11:24:01 | 29.687 | 1/11/2011 17:59:01 | 27.259 |
| 1/13/2011 11:44:01 | 30.997 | 1/11/2011 18:19:01 | 27.259 |
| 1/13/2011 12:04:01 | 29.374 | 1/11/2011 18:39:01 | 27.321 |
| 1/13/2011 12:24:01 | 30.747 | 1/11/2011 18:59:01 | 27.321 |
| 1/13/2011 12:44:01 | 29.936 | 1/11/2011 19:19:01 | 27.321 |
| 1/13/2011 13:04:01 | 30.248 | 1/11/2011 19:39:01 | 27.321 |
| 1/13/2011 13:24:01 | 31.683 | 1/11/2011 19:59:01 | 27.384 |
| 1/13/2011 13:44:01 | 32.182 | 1/11/2011 20:19:01 | 27.384 |
| 1/13/2011 14:04:01 | 31.122 | 1/11/2011 20:39:01 | 27.384 |
| 1/13/2011 14:24:01 | 33.055 | 1/11/2011 20:59:01 | 27.384 |
| 1/13/2011 14:44:01 | 33.118 | 1/11/2011 21:19:01 | 27.384 |
| 1/13/2011 15:04:01 | 33.180 | 1/11/2011 21:39:01 | 27.384 |
| 1/13/2011 15:24:01 | 32.307 | 1/11/2011 21:59:01 | 27.384 |
| 1/13/2011 15:44:01 | 32.182 | 1/11/2011 22:19:01 | 27.384 |
| 1/13/2011 16:04:01 | 31.184 | 1/11/2011 22:39:01 | 27.446 |
| 1/13/2011 16:24:01 | 30.810 | 1/11/2011 22:59:01 | 27.446 |
| 1/13/2011 16:44:01 | 29.749 | 1/11/2011 23:19:01 | 27.446 |
| 1/13/2011 17:04:01 | 29.062 | 1/11/2011 23:39:01 | 27.446 |
| 1/13/2011 17:24:01 | 28.875 | 1/11/2011 23:59:01 | 27.446 |
| 1/13/2011 17:44:01 | 28.750 | 1/12/2011 00:19:01 | 27.384 |
| 1/13/2011 18:04:01 | 29.062 | 1/12/2011 00:39:01 | 27.384 |
| 1/13/2011 18:24:01 | 28.688 | 1/12/2011 00:59:01 | 27.384 |
| 1/13/2011 18:44:01 | 28.001 | 1/12/2011 01:19:01 | 27.384 |
| 1/13/2011 19:04:01 | 27.376 | 1/12/2011 01:39:01 | 27.384 |
| 1/13/2011 19:24:01 | 27.002 | 1/12/2011 01:59:01 | 27.384 |
| 1/13/2011 19:44:01 | 26.564 | 1/12/2011 02:19:01 | 27.321 |
| 1/13/2011 20:04:01 | 26.377 | 1/12/2011 02:39:01 | 27.259 |
| 1/13/2011 20:24:01 | 26.189 | 1/12/2011 02:59:01 | 27.259 |
| 1/13/2011 20:44:01 | 25.752 | 1/12/2011 03:19:01 | 27.197 |
| 1/13/2011 21:04:01 | 23.376 | 1/12/2011 03:39:01 | 27.134 |
| 1/13/2011 21:24:01 | 22.063 | 1/12/2011 03:59:01 | 27.072 |
| 1/13/2011 21:44:01 | 21.249 | 1/12/2011 04:19:01 | 27.072 |
| 1/13/2011 22:04:01 | 21.750 | 1/12/2011 04:39:01 | 27.009 |

|                    |        |                    |        |
|--------------------|--------|--------------------|--------|
| 1/13/2011 22:24:01 | 22.000 | 1/12/2011 04:59:01 | 26.947 |
| 1/13/2011 22:44:01 | 22.000 | 1/12/2011 05:19:01 | 26.947 |
| 1/13/2011 23:04:01 | 21.813 | 1/12/2011 05:39:01 | 26.884 |
| 1/13/2011 23:24:01 | 21.625 | 1/12/2011 05:59:01 | 26.884 |
| 1/13/2011 23:44:01 | 21.500 | 1/12/2011 06:19:01 | 26.822 |
| 1/14/2011 00:04:01 | 21.437 | 1/12/2011 06:39:01 | 26.822 |
| 1/14/2011 00:24:01 | 21.249 | 1/12/2011 06:59:01 | 26.759 |
| 1/14/2011 00:44:01 | 21.249 | 1/12/2011 07:19:01 | 26.759 |
| 1/14/2011 01:04:01 | 21.249 | 1/12/2011 07:39:01 | 26.759 |
| 1/14/2011 01:24:01 | 21.124 | 1/12/2011 07:59:01 | 26.697 |
| 1/14/2011 01:44:01 | 21.187 | 1/12/2011 08:19:01 | 26.697 |
| 1/14/2011 02:04:01 | 21.124 | 1/12/2011 08:39:01 | 26.697 |
| 1/14/2011 02:24:01 | 21.124 | 1/12/2011 08:59:01 | 26.697 |
| 1/14/2011 02:44:01 | 21.249 | 1/12/2011 09:19:01 | 26.634 |
| 1/14/2011 03:04:01 | 21.375 | 1/12/2011 09:39:01 | 26.634 |
| 1/14/2011 03:24:01 | 21.500 | 1/12/2011 09:59:01 | 26.634 |
| 1/14/2011 03:44:01 | 21.687 | 1/12/2011 10:19:01 | 26.634 |
| 1/14/2011 04:04:01 | 21.813 | 1/12/2011 10:39:01 | 26.634 |
| 1/14/2011 04:24:01 | 21.938 | 1/12/2011 10:59:01 | 26.634 |
| 1/14/2011 04:44:01 | 21.938 | 1/12/2011 11:19:01 | 26.634 |
| 1/14/2011 05:04:01 | 22.000 | 1/12/2011 11:39:01 | 26.634 |
| 1/14/2011 05:24:01 | 21.938 | 1/12/2011 11:59:01 | 26.634 |
| 1/14/2011 05:44:01 | 21.875 | 1/12/2011 12:19:01 | 26.634 |
| 1/14/2011 06:04:01 | 22.063 | 1/12/2011 12:39:01 | 26.634 |
| 1/14/2011 06:24:01 | 22.501 | 1/12/2011 12:59:01 | 26.634 |
| 1/14/2011 06:44:01 | 22.876 | 1/12/2011 13:19:01 | 26.634 |
| 1/14/2011 07:04:01 | 23.314 | 1/12/2011 13:39:01 | 26.634 |
| 1/14/2011 07:24:01 | 23.376 | 1/12/2011 13:59:01 | 26.634 |
| 1/14/2011 07:44:01 | 24.002 | 1/12/2011 14:19:01 | 26.697 |
| 1/14/2011 08:04:01 | 25.064 | 1/12/2011 14:39:01 | 26.697 |
| 1/14/2011 08:24:01 | 25.627 | 1/12/2011 14:59:01 | 26.697 |
| 1/14/2011 08:44:01 | 26.064 | 1/12/2011 15:19:01 | 26.759 |
| 1/14/2011 09:04:01 | 26.814 | 1/12/2011 15:39:01 | 26.759 |
| 1/14/2011 09:24:01 | 27.501 | 1/12/2011 15:59:01 | 26.759 |
| 1/14/2011 09:44:01 | 28.500 | 1/12/2011 16:19:01 | 26.759 |
| 1/14/2011 10:04:01 | 27.626 | 1/12/2011 16:39:01 | 26.822 |
| 1/14/2011 10:24:01 | 28.813 | 1/12/2011 16:59:01 | 26.822 |
| 1/14/2011 10:44:01 | 28.625 | 1/12/2011 17:19:01 | 26.884 |
| 1/14/2011 11:04:01 | 29.562 | 1/12/2011 17:39:01 | 26.884 |
| 1/14/2011 11:24:01 | 31.059 | 1/12/2011 17:59:01 | 26.884 |
| 1/14/2011 11:44:01 | 29.936 | 1/12/2011 18:19:01 | 26.947 |
| 1/14/2011 12:04:01 | 31.496 | 1/12/2011 18:39:01 | 26.947 |
| 1/14/2011 12:24:01 | 29.936 | 1/12/2011 18:59:01 | 26.947 |
| 1/14/2011 12:44:01 | 30.373 | 1/12/2011 19:19:01 | 26.947 |
| 1/14/2011 13:04:01 | 30.498 | 1/12/2011 19:39:01 | 27.009 |
| 1/14/2011 13:24:01 | 30.935 | 1/12/2011 19:59:01 | 27.009 |
| 1/14/2011 13:44:01 | 29.562 | 1/12/2011 20:19:01 | 27.009 |
| 1/14/2011 14:04:01 | 33.118 | 1/12/2011 20:39:01 | 27.009 |
| 1/14/2011 14:24:01 | 31.122 | 1/12/2011 20:59:01 | 27.072 |
| 1/14/2011 14:44:01 | 30.186 | 1/12/2011 21:19:01 | 27.072 |

|                    |        |                    |        |
|--------------------|--------|--------------------|--------|
| 1/14/2011 15:04:01 | 30.123 | 1/12/2011 21:39:01 | 27.072 |
| 1/14/2011 15:24:01 | 28.625 | 1/12/2011 21:59:01 | 27.072 |
| 1/14/2011 15:44:01 | 28.563 | 1/12/2011 22:19:01 | 27.072 |
| 1/14/2011 16:04:01 | 29.499 | 1/12/2011 22:39:01 | 27.072 |
| 1/14/2011 16:24:01 | 27.938 | 1/12/2011 22:59:01 | 27.072 |
| 1/14/2011 16:44:01 | 27.626 | 1/12/2011 23:19:01 | 27.072 |
| 1/14/2011 17:04:01 | 27.564 | 1/12/2011 23:39:01 | 27.072 |
| 1/14/2011 17:24:01 | 26.814 | 1/12/2011 23:59:01 | 27.072 |
| 1/14/2011 17:44:01 | 26.314 | 1/13/2011 00:19:01 | 27.072 |
| 1/14/2011 18:04:01 | 25.814 | 1/13/2011 00:39:01 | 27.072 |
| 1/14/2011 18:24:01 | 25.377 | 1/13/2011 00:59:01 | 27.072 |
| 1/14/2011 18:44:01 | 24.814 | 1/13/2011 01:19:01 | 27.009 |
| 1/14/2011 19:04:01 | 24.252 | 1/13/2011 01:39:01 | 27.009 |
| 1/14/2011 19:24:01 | 24.064 | 1/13/2011 01:59:01 | 26.947 |
| 1/14/2011 19:44:01 | 24.002 | 1/13/2011 02:19:01 | 26.947 |
| 1/14/2011 20:04:01 | 23.939 | 1/13/2011 02:39:01 | 26.884 |
| 1/14/2011 20:24:01 | 23.877 | 1/13/2011 02:59:01 | 26.884 |
| 1/14/2011 20:44:01 | 23.939 | 1/13/2011 03:19:01 | 26.822 |
| 1/14/2011 21:04:01 | 24.002 | 1/13/2011 03:39:01 | 26.822 |
| 1/14/2011 21:24:01 | 24.189 | 1/13/2011 03:59:01 | 26.759 |
| 1/14/2011 21:44:01 | 24.377 | 1/13/2011 04:19:01 | 26.759 |
| 1/14/2011 22:04:01 | 24.564 | 1/13/2011 04:39:01 | 26.697 |
| 1/14/2011 22:24:01 | 24.939 | 1/13/2011 04:59:01 | 26.697 |
| 1/14/2011 22:44:01 | 24.752 | 1/13/2011 05:19:01 | 26.634 |
| 1/14/2011 23:04:01 | 24.502 | 1/13/2011 05:39:01 | 26.634 |
| 1/14/2011 23:24:01 | 24.127 | 1/13/2011 05:59:01 | 26.572 |
| 1/14/2011 23:44:01 | 23.627 | 1/13/2011 06:19:01 | 26.572 |
| 1/15/2011 00:04:01 | 23.251 | 1/13/2011 06:39:01 | 26.572 |
| 1/15/2011 00:24:01 | 23.064 | 1/13/2011 06:59:01 | 26.572 |
| 1/15/2011 00:44:01 | 23.001 | 1/13/2011 07:19:01 | 26.509 |
| 1/15/2011 01:04:01 | 22.939 | 1/13/2011 07:39:01 | 26.509 |
| 1/15/2011 01:24:01 | 22.876 | 1/13/2011 07:59:01 | 26.509 |
| 1/15/2011 01:44:01 | 22.751 | 1/13/2011 08:19:01 | 26.447 |
| 1/15/2011 02:04:01 | 22.751 | 1/13/2011 08:39:01 | 26.447 |
| 1/15/2011 02:24:01 | 22.814 | 1/13/2011 08:59:01 | 26.447 |
| 1/15/2011 02:44:01 | 22.876 | 1/13/2011 09:19:01 | 26.447 |
| 1/15/2011 03:04:01 | 22.814 | 1/13/2011 09:39:01 | 26.447 |
| 1/15/2011 03:24:01 | 22.688 | 1/13/2011 09:59:01 | 26.384 |
| 1/15/2011 03:44:01 | 22.688 | 1/13/2011 10:19:01 | 26.384 |
| 1/15/2011 04:04:01 | 22.626 | 1/13/2011 10:39:01 | 26.384 |
| 1/15/2011 04:24:01 | 22.688 | 1/13/2011 10:59:01 | 26.384 |
| 1/15/2011 04:44:01 | 22.876 | 1/13/2011 11:19:01 | 26.384 |
| 1/15/2011 05:04:01 | 22.939 | 1/13/2011 11:39:01 | 26.384 |
| 1/15/2011 05:24:01 | 22.876 | 1/13/2011 11:59:01 | 26.384 |
| 1/15/2011 05:44:01 | 22.876 | 1/13/2011 12:19:01 | 26.447 |
| 1/15/2011 06:04:01 | 22.814 | 1/13/2011 12:39:01 | 26.447 |
| 1/15/2011 06:24:01 | 23.001 | 1/13/2011 12:59:01 | 26.447 |
| 1/15/2011 06:44:01 | 23.314 | 1/13/2011 13:19:01 | 26.447 |
| 1/15/2011 07:04:01 | 23.564 | 1/13/2011 13:39:01 | 26.447 |
| 1/15/2011 07:24:01 | 23.939 | 1/13/2011 13:59:01 | 26.447 |

|                    |        |                    |        |
|--------------------|--------|--------------------|--------|
| 1/15/2011 07:44:01 | 24.752 | 1/13/2011 14:19:01 | 26.509 |
| 1/15/2011 08:04:01 | 25.314 | 1/13/2011 14:39:01 | 26.509 |
| 1/15/2011 08:24:01 | 25.627 | 1/13/2011 14:59:01 | 26.509 |
| 1/15/2011 08:44:01 | 26.252 | 1/13/2011 15:19:01 | 26.509 |
| 1/15/2011 09:04:01 | 27.002 | 1/13/2011 15:39:01 | 26.572 |
| 1/15/2011 09:24:01 | 27.938 | 1/13/2011 15:59:01 | 26.572 |
| 1/15/2011 09:44:01 | 29.499 | 1/13/2011 16:19:01 | 26.572 |
| 1/15/2011 10:04:01 | 30.935 | 1/13/2011 16:39:01 | 26.634 |
| 1/15/2011 10:24:01 | 30.810 | 1/13/2011 16:59:01 | 26.634 |
| 1/15/2011 10:44:01 | 31.309 | 1/13/2011 17:19:01 | 26.634 |
| 1/15/2011 11:04:01 | 31.995 | 1/13/2011 17:39:01 | 26.697 |
| 1/15/2011 11:24:01 | 32.556 | 1/13/2011 17:59:01 | 26.697 |
| 1/15/2011 11:44:01 | 33.180 | 1/13/2011 18:19:01 | 26.759 |
| 1/15/2011 12:04:01 | 33.492 | 1/13/2011 18:39:01 | 26.759 |
| 1/15/2011 12:24:01 | 33.990 | 1/13/2011 18:59:01 | 26.759 |
| 1/15/2011 12:44:01 | 34.427 | 1/13/2011 19:19:01 | 26.822 |
| 1/15/2011 13:04:01 | 34.427 | 1/13/2011 19:39:01 | 26.822 |
| 1/15/2011 13:24:01 | 34.489 | 1/13/2011 19:59:01 | 26.822 |
| 1/15/2011 13:44:01 | 34.551 | 1/13/2011 20:19:01 | 26.884 |
| 1/15/2011 14:04:01 | 34.863 | 1/13/2011 20:39:01 | 26.884 |
| 1/15/2011 14:24:01 | 34.801 | 1/13/2011 20:59:01 | 26.884 |
| 1/15/2011 14:44:01 | 34.302 | 1/13/2011 21:19:01 | 26.884 |
| 1/15/2011 15:04:01 | 33.803 | 1/13/2011 21:39:01 | 26.947 |
| 1/15/2011 15:24:01 | 32.619 | 1/13/2011 21:59:01 | 26.947 |
| 1/15/2011 15:44:01 | 32.057 | 1/13/2011 22:19:01 | 26.947 |
| 1/15/2011 16:04:01 | 31.496 | 1/13/2011 22:39:01 | 26.884 |
| 1/15/2011 16:24:01 | 30.872 | 1/13/2011 22:59:01 | 26.884 |
| 1/15/2011 16:44:01 | 30.435 | 1/13/2011 23:19:01 | 26.884 |
| 1/15/2011 17:04:01 | 29.936 | 1/13/2011 23:39:01 | 26.822 |
| 1/15/2011 17:24:01 | 29.499 | 1/13/2011 23:59:01 | 26.759 |
| 1/15/2011 17:44:01 | 29.187 | 1/14/2011 00:19:01 | 26.759 |
| 1/15/2011 18:04:01 | 28.688 | 1/14/2011 00:39:01 | 26.697 |
| 1/15/2011 18:24:01 | 28.063 | 1/14/2011 00:59:01 | 26.697 |
| 1/15/2011 18:44:01 | 27.439 | 1/14/2011 01:19:01 | 26.634 |
| 1/15/2011 19:04:01 | 26.939 | 1/14/2011 01:39:01 | 26.634 |
| 1/15/2011 19:24:01 | 26.814 | 1/14/2011 01:59:01 | 26.572 |
| 1/15/2011 19:44:01 | 26.627 | 1/14/2011 02:19:01 | 26.572 |
| 1/15/2011 20:04:01 | 26.127 | 1/14/2011 02:39:01 | 26.509 |
| 1/15/2011 20:24:01 | 25.814 | 1/14/2011 02:59:01 | 26.509 |
| 1/15/2011 20:44:01 | 25.564 | 1/14/2011 03:19:01 | 26.447 |
| 1/15/2011 21:04:01 | 25.439 | 1/14/2011 03:39:01 | 26.447 |
| 1/15/2011 21:24:01 | 25.377 | 1/14/2011 03:59:01 | 26.447 |
| 1/15/2011 21:44:01 | 25.439 | 1/14/2011 04:19:01 | 26.384 |
| 1/15/2011 22:04:01 | 25.377 | 1/14/2011 04:39:01 | 26.384 |
| 1/15/2011 22:24:01 | 25.127 | 1/14/2011 04:59:01 | 26.384 |
| 1/15/2011 22:44:01 | 25.002 | 1/14/2011 05:19:01 | 26.384 |
| 1/15/2011 23:04:01 | 24.939 | 1/14/2011 05:39:01 | 26.322 |
| 1/15/2011 23:24:01 | 24.877 | 1/14/2011 05:59:01 | 26.322 |
| 1/15/2011 23:44:01 | 24.877 | 1/14/2011 06:19:01 | 26.322 |
| 1/16/2011 00:04:01 | 24.814 | 1/14/2011 06:39:01 | 26.322 |

|                    |        |                    |        |
|--------------------|--------|--------------------|--------|
| 1/16/2011 00:24:01 | 24.752 | 1/14/2011 06:59:01 | 26.260 |
| 1/16/2011 00:44:01 | 24.502 | 1/14/2011 07:19:01 | 26.260 |
| 1/16/2011 01:04:01 | 24.127 | 1/14/2011 07:39:01 | 26.260 |
| 1/16/2011 01:24:01 | 23.501 | 1/14/2011 07:59:01 | 26.260 |
| 1/16/2011 01:44:01 | 23.376 | 1/14/2011 08:19:01 | 26.197 |
| 1/16/2011 02:04:01 | 23.439 | 1/14/2011 08:39:01 | 26.197 |
| 1/16/2011 02:24:01 | 23.439 | 1/14/2011 08:59:01 | 26.197 |
| 1/16/2011 02:44:01 | 23.501 | 1/14/2011 09:19:01 | 26.197 |
| 1/16/2011 03:04:01 | 23.564 | 1/14/2011 09:39:01 | 26.197 |
| 1/16/2011 03:24:01 | 23.627 | 1/14/2011 09:59:01 | 26.197 |
| 1/16/2011 03:44:01 | 23.627 | 1/14/2011 10:19:01 | 26.197 |
| 1/16/2011 04:04:01 | 23.627 | 1/14/2011 10:39:01 | 26.197 |
| 1/16/2011 04:24:01 | 23.627 | 1/14/2011 10:59:01 | 26.197 |
| 1/16/2011 04:44:01 | 23.627 | 1/14/2011 11:19:01 | 26.197 |
| 1/16/2011 05:04:01 | 23.627 | 1/14/2011 11:39:01 | 26.197 |
| 1/16/2011 05:24:01 | 23.689 | 1/14/2011 11:59:01 | 26.197 |
| 1/16/2011 05:44:01 | 23.689 | 1/14/2011 12:19:01 | 26.197 |
| 1/16/2011 06:04:01 | 23.752 | 1/14/2011 12:39:01 | 26.197 |
| 1/16/2011 06:24:01 | 23.877 | 1/14/2011 12:59:01 | 26.197 |
| 1/16/2011 06:44:01 | 23.814 | 1/14/2011 13:19:01 | 26.197 |
| 1/16/2011 07:04:01 | 23.752 | 1/14/2011 13:39:01 | 26.260 |
| 1/16/2011 07:24:01 | 23.814 | 1/14/2011 13:59:01 | 26.260 |
| 1/16/2011 07:44:01 | 23.939 | 1/14/2011 14:19:01 | 26.260 |
| 1/16/2011 08:04:01 | 24.064 | 1/14/2011 14:39:01 | 26.322 |
| 1/16/2011 08:24:01 | 24.127 | 1/14/2011 14:59:01 | 26.322 |
| 1/16/2011 08:44:01 | 24.064 | 1/14/2011 15:19:01 | 26.322 |
| 1/16/2011 09:04:01 | 24.064 | 1/14/2011 15:39:01 | 26.322 |
| 1/16/2011 09:24:01 | 23.939 | 1/14/2011 15:59:01 | 26.384 |
| 1/16/2011 09:44:01 | 23.939 | 1/14/2011 16:19:01 | 26.384 |
| 1/16/2011 10:04:01 | 24.189 | 1/14/2011 16:39:01 | 26.384 |
| 1/16/2011 10:24:01 | 24.439 | 1/14/2011 16:59:01 | 26.447 |
| 1/16/2011 10:44:01 | 24.314 | 1/14/2011 17:19:01 | 26.447 |
| 1/16/2011 11:04:01 | 24.814 | 1/14/2011 17:39:01 | 26.509 |
| 1/16/2011 11:24:01 | 24.877 | 1/14/2011 17:59:01 | 26.509 |
| 1/16/2011 11:44:01 | 24.752 | 1/14/2011 18:19:01 | 26.509 |
| 1/16/2011 12:04:01 | 24.752 | 1/14/2011 18:39:01 | 26.509 |
| 1/16/2011 12:24:01 | 25.189 | 1/14/2011 18:59:01 | 26.572 |
| 1/16/2011 12:44:01 | 25.439 | 1/14/2011 19:19:01 | 26.572 |
| 1/16/2011 13:04:01 | 25.689 | 1/14/2011 19:39:01 | 26.572 |
| 1/16/2011 13:24:01 | 25.814 | 1/14/2011 19:59:01 | 26.572 |
| 1/16/2011 13:44:01 | 25.314 | 1/14/2011 20:19:01 | 26.634 |
| 1/16/2011 14:04:01 | 25.814 | 1/14/2011 20:39:01 | 26.634 |
| 1/16/2011 14:24:01 | 25.752 | 1/14/2011 20:59:01 | 26.634 |
| 1/16/2011 14:44:01 | 25.127 | 1/14/2011 21:19:01 | 26.634 |
| 1/16/2011 15:04:01 | 24.814 | 1/14/2011 21:39:01 | 26.634 |
| 1/16/2011 15:24:01 | 25.002 | 1/14/2011 21:59:01 | 26.634 |
| 1/16/2011 15:44:01 | 25.689 | 1/14/2011 22:19:01 | 26.634 |
| 1/16/2011 16:04:01 | 25.814 | 1/14/2011 22:39:01 | 26.634 |
| 1/16/2011 16:24:01 | 25.502 | 1/14/2011 22:59:01 | 26.634 |
| 1/16/2011 16:44:01 | 24.939 | 1/14/2011 23:19:01 | 26.634 |

|                    |        |                    |        |
|--------------------|--------|--------------------|--------|
| 1/16/2011 17:04:01 | 24.814 | 1/14/2011 23:39:01 | 26.634 |
| 1/16/2011 17:24:01 | 24.877 | 1/14/2011 23:59:01 | 26.634 |
| 1/16/2011 17:44:01 | 25.064 | 1/15/2011 00:19:01 | 26.634 |
| 1/16/2011 18:04:01 | 24.627 | 1/15/2011 00:39:01 | 26.634 |
| 1/16/2011 18:24:01 | 24.189 | 1/15/2011 00:59:01 | 26.634 |
| 1/16/2011 18:44:01 | 23.814 | 1/15/2011 01:19:01 | 26.634 |
| 1/16/2011 19:04:01 | 23.501 | 1/15/2011 01:39:01 | 26.572 |
| 1/16/2011 19:24:01 | 23.126 | 1/15/2011 01:59:01 | 26.572 |
| 1/16/2011 19:44:01 | 22.876 | 1/15/2011 02:19:01 | 26.572 |
| 1/16/2011 20:04:01 | 22.814 | 1/15/2011 02:39:01 | 26.572 |
| 1/16/2011 20:24:01 | 22.626 | 1/15/2011 02:59:01 | 26.572 |
| 1/16/2011 20:44:01 | 22.438 | 1/15/2011 03:19:01 | 26.572 |
| 1/16/2011 21:04:01 | 22.376 | 1/15/2011 03:39:01 | 26.572 |
| 1/16/2011 21:24:01 | 22.251 | 1/15/2011 03:59:01 | 26.572 |
| 1/16/2011 21:44:01 | 22.313 | 1/15/2011 04:19:01 | 26.572 |
| 1/16/2011 22:04:01 | 22.438 | 1/15/2011 04:39:01 | 26.509 |
| 1/16/2011 22:24:01 | 22.501 | 1/15/2011 04:59:01 | 26.509 |
| 1/16/2011 22:44:01 | 22.501 | 1/15/2011 05:19:01 | 26.509 |
| 1/16/2011 23:04:01 | 22.563 | 1/15/2011 05:39:01 | 26.509 |
| 1/16/2011 23:24:01 | 22.563 | 1/15/2011 05:59:01 | 26.509 |
| 1/16/2011 23:44:01 | 22.563 | 1/15/2011 06:19:01 | 26.509 |
| 1/17/2011 00:04:01 | 22.563 | 1/15/2011 06:39:01 | 26.509 |
| 1/17/2011 00:24:01 | 22.626 | 1/15/2011 06:59:01 | 26.509 |
| 1/17/2011 00:44:01 | 22.626 | 1/15/2011 07:19:01 | 26.447 |
| 1/17/2011 01:04:01 | 22.501 | 1/15/2011 07:39:01 | 26.447 |
| 1/17/2011 01:24:01 | 22.313 | 1/15/2011 07:59:01 | 26.447 |
| 1/17/2011 01:44:01 | 22.188 | 1/15/2011 08:19:01 | 26.447 |
| 1/17/2011 02:04:01 | 22.251 | 1/15/2011 08:39:01 | 26.447 |
| 1/17/2011 02:24:01 | 22.313 | 1/15/2011 08:59:01 | 26.447 |
| 1/17/2011 02:44:01 | 22.376 | 1/15/2011 09:19:01 | 26.384 |
| 1/17/2011 03:04:01 | 22.251 | 1/15/2011 09:39:01 | 26.384 |
| 1/17/2011 03:24:01 | 22.063 | 1/15/2011 09:59:01 | 26.384 |
| 1/17/2011 03:44:01 | 21.938 | 1/15/2011 10:19:01 | 26.384 |
| 1/17/2011 04:04:01 | 22.000 | 1/15/2011 10:39:01 | 26.384 |
| 1/17/2011 04:24:01 | 22.125 | 1/15/2011 10:59:01 | 26.384 |
| 1/17/2011 04:44:01 | 22.251 | 1/15/2011 11:19:01 | 26.384 |
| 1/17/2011 05:04:01 | 22.251 | 1/15/2011 11:39:01 | 26.384 |
| 1/17/2011 05:24:01 | 22.063 | 1/15/2011 11:59:01 | 26.384 |
| 1/17/2011 05:44:01 | 21.875 | 1/15/2011 12:19:01 | 26.447 |
| 1/17/2011 06:04:01 | 21.813 | 1/15/2011 12:39:01 | 26.447 |
| 1/17/2011 06:24:01 | 22.063 | 1/15/2011 12:59:01 | 26.447 |
| 1/17/2011 06:44:01 | 22.563 | 1/15/2011 13:19:01 | 26.447 |
| 1/17/2011 07:04:01 | 23.251 | 1/15/2011 13:39:01 | 26.447 |
| 1/17/2011 07:24:01 | 24.064 | 1/15/2011 13:59:01 | 26.447 |
| 1/17/2011 07:44:01 | 25.314 | 1/15/2011 14:19:01 | 26.509 |
| 1/17/2011 08:04:01 | 26.189 | 1/15/2011 14:39:01 | 26.509 |
| 1/17/2011 08:24:01 | 27.189 | 1/15/2011 14:59:01 | 26.509 |
| 1/17/2011 08:44:01 | 27.439 | 1/15/2011 15:19:01 | 26.572 |
| 1/17/2011 09:04:01 | 28.001 | 1/15/2011 15:39:01 | 26.572 |
| 1/17/2011 09:24:01 | 28.376 | 1/15/2011 15:59:01 | 26.634 |

|                    |        |                    |        |
|--------------------|--------|--------------------|--------|
| 1/17/2011 09:44:01 | 28.563 | 1/15/2011 16:19:01 | 26.634 |
| 1/17/2011 10:04:01 | 29.624 | 1/15/2011 16:39:01 | 26.634 |
| 1/17/2011 10:24:01 | 29.999 | 1/15/2011 16:59:01 | 26.697 |
| 1/17/2011 10:44:01 | 31.434 | 1/15/2011 17:19:01 | 26.697 |
| 1/17/2011 11:04:01 | 30.498 | 1/15/2011 17:39:01 | 26.759 |
| 1/17/2011 11:24:01 | 29.062 | 1/15/2011 17:59:01 | 26.759 |
| 1/17/2011 11:44:01 | 29.187 | 1/15/2011 18:19:01 | 26.759 |
| 1/17/2011 12:04:01 | 29.999 | 1/15/2011 18:39:01 | 26.822 |
| 1/17/2011 12:24:01 | 30.685 | 1/15/2011 18:59:01 | 26.822 |
| 1/17/2011 12:44:01 | 32.494 | 1/15/2011 19:19:01 | 26.884 |
| 1/17/2011 13:04:01 | 32.806 | 1/15/2011 19:39:01 | 26.884 |
| 1/17/2011 13:24:01 | 31.746 | 1/15/2011 19:59:01 | 26.884 |
| 1/17/2011 13:44:01 | 30.311 | 1/15/2011 20:19:01 | 26.884 |
| 1/17/2011 14:04:01 | 31.995 | 1/15/2011 20:39:01 | 26.947 |
| 1/17/2011 14:24:01 | 33.055 | 1/15/2011 20:59:01 | 26.947 |
| 1/17/2011 14:44:01 | 31.371 | 1/15/2011 21:19:01 | 26.947 |
| 1/17/2011 15:04:01 | 32.494 | 1/15/2011 21:39:01 | 26.947 |
| 1/17/2011 15:24:01 | 31.247 | 1/15/2011 21:59:01 | 26.947 |
| 1/17/2011 15:44:01 | 30.435 | 1/15/2011 22:19:01 | 26.947 |
| 1/17/2011 16:04:01 | 30.248 | 1/15/2011 22:39:01 | 26.947 |
| 1/17/2011 16:24:01 | 30.123 | 1/15/2011 22:59:01 | 26.947 |
| 1/17/2011 16:44:01 | 29.562 | 1/15/2011 23:19:01 | 26.947 |
| 1/17/2011 17:04:01 | 29.125 | 1/15/2011 23:39:01 | 26.947 |
| 1/17/2011 17:24:01 | 28.625 | 1/15/2011 23:59:01 | 26.947 |
| 1/17/2011 17:44:01 | 28.063 | 1/16/2011 00:19:01 | 27.009 |
| 1/17/2011 18:04:01 | 27.689 | 1/16/2011 00:39:01 | 26.947 |
| 1/17/2011 18:24:01 | 27.938 | 1/16/2011 00:59:01 | 26.947 |
| 1/17/2011 18:44:01 | 27.689 | 1/16/2011 01:19:01 | 26.947 |
| 1/17/2011 19:04:01 | 26.939 | 1/16/2011 01:39:01 | 26.947 |
| 1/17/2011 19:24:01 | 26.377 | 1/16/2011 01:59:01 | 26.947 |
| 1/17/2011 19:44:01 | 25.939 | 1/16/2011 02:19:01 | 26.947 |
| 1/17/2011 20:04:01 | 26.002 | 1/16/2011 02:39:01 | 26.884 |
| 1/17/2011 20:24:01 | 25.814 | 1/16/2011 02:59:01 | 26.884 |
| 1/17/2011 20:44:01 | 25.377 | 1/16/2011 03:19:01 | 26.822 |
| 1/17/2011 21:04:01 | 24.939 | 1/16/2011 03:39:01 | 26.822 |
| 1/17/2011 21:24:01 | 24.939 | 1/16/2011 03:59:01 | 26.759 |
| 1/17/2011 21:44:01 | 25.127 | 1/16/2011 04:19:01 | 26.759 |
| 1/17/2011 22:04:01 | 25.564 | 1/16/2011 04:39:01 | 26.697 |
| 1/17/2011 22:24:01 | 25.752 | 1/16/2011 04:59:01 | 26.697 |
| 1/17/2011 22:44:01 | 25.689 | 1/16/2011 05:19:01 | 26.634 |
| 1/17/2011 23:04:01 | 24.689 | 1/16/2011 05:39:01 | 26.634 |
| 1/17/2011 23:24:01 | 23.314 | 1/16/2011 05:59:01 | 26.572 |
| 1/17/2011 23:44:01 | 23.314 | 1/16/2011 06:19:01 | 26.572 |
| 1/18/2011 00:04:01 | 23.251 | 1/16/2011 06:39:01 | 26.509 |
| 1/18/2011 00:24:01 | 23.251 | 1/16/2011 06:59:01 | 26.509 |
| 1/18/2011 00:44:01 | 23.126 | 1/16/2011 07:19:01 | 26.509 |
| 1/18/2011 01:04:01 | 23.064 | 1/16/2011 07:39:01 | 26.447 |
| 1/18/2011 01:24:01 | 22.939 | 1/16/2011 07:59:01 | 26.447 |
| 1/18/2011 01:44:01 | 22.876 | 1/16/2011 08:19:01 | 26.447 |
| 1/18/2011 02:04:01 | 22.751 | 1/16/2011 08:39:01 | 26.447 |



|                    |        |                    |        |
|--------------------|--------|--------------------|--------|
| 1/18/2011 02:24:01 | 22.751 | 1/16/2011 08:59:01 | 26.384 |
| 1/18/2011 02:44:01 | 22.814 | 1/16/2011 09:19:01 | 26.384 |
| 1/18/2011 03:04:01 | 22.939 | 1/16/2011 09:39:01 | 26.384 |
| 1/18/2011 03:24:01 | 23.126 | 1/16/2011 09:59:01 | 26.384 |
| 1/18/2011 03:44:01 | 23.189 | 1/16/2011 10:19:01 | 26.384 |
| 1/18/2011 04:04:01 | 23.189 | 1/16/2011 10:39:01 | 26.322 |
| 1/18/2011 04:24:01 | 23.251 | 1/16/2011 10:59:01 | 26.322 |
| 1/18/2011 04:44:01 | 23.439 | 1/16/2011 11:19:01 | 26.322 |
| 1/18/2011 05:04:01 | 23.501 | 1/16/2011 11:39:01 | 26.322 |
| 1/18/2011 05:24:01 | 23.564 | 1/16/2011 11:59:01 | 26.322 |
| 1/18/2011 05:44:01 | 23.627 | 1/16/2011 12:19:01 | 26.322 |
| 1/18/2011 06:04:01 | 23.689 | 1/16/2011 12:39:01 | 26.322 |
| 1/18/2011 06:24:01 | 23.814 | 1/16/2011 12:59:01 | 26.322 |
| 1/18/2011 06:44:01 | 23.939 | 1/16/2011 13:19:01 | 26.260 |
| 1/18/2011 07:04:01 | 24.127 | 1/16/2011 13:39:01 | 26.322 |
| 1/18/2011 07:24:01 | 24.564 | 1/16/2011 13:59:01 | 26.260 |
| 1/18/2011 07:44:01 | 25.127 | 1/16/2011 14:19:01 | 26.260 |
| 1/18/2011 08:04:01 | 25.877 | 1/16/2011 14:39:01 | 26.260 |
| 1/18/2011 08:24:01 | 26.064 | 1/16/2011 14:59:01 | 26.260 |
| 1/18/2011 08:44:01 | 26.314 | 1/16/2011 15:19:01 | 26.260 |
| 1/18/2011 09:04:01 | 27.064 | 1/16/2011 15:39:01 | 26.260 |
| 1/18/2011 09:24:01 | 27.126 | 1/16/2011 15:59:01 | 26.260 |
| 1/18/2011 09:44:01 | 26.627 | 1/16/2011 16:19:01 | 26.322 |
| 1/18/2011 10:04:01 | 26.689 | 1/16/2011 16:39:01 | 26.322 |
| 1/18/2011 10:24:01 | 26.627 | 1/16/2011 16:59:01 | 26.322 |
| 1/18/2011 10:44:01 | 26.439 | 1/16/2011 17:19:01 | 26.322 |
| 1/18/2011 11:04:01 | 27.126 | 1/16/2011 17:39:01 | 26.322 |
| 1/18/2011 11:24:01 | 28.063 | 1/16/2011 17:59:01 | 26.322 |
| 1/18/2011 11:44:01 | 28.875 | 1/16/2011 18:19:01 | 26.322 |
| 1/18/2011 12:04:01 | 29.374 | 1/16/2011 18:39:01 | 26.322 |
| 1/18/2011 12:24:01 | 29.499 | 1/16/2011 18:59:01 | 26.322 |
| 1/18/2011 12:44:01 | 28.625 | 1/16/2011 19:19:01 | 26.322 |
| 1/18/2011 13:04:01 | 28.625 | 1/16/2011 19:39:01 | 26.322 |
| 1/18/2011 13:24:01 | 30.248 | 1/16/2011 19:59:01 | 26.322 |
| 1/18/2011 13:44:01 | 28.563 | 1/16/2011 20:19:01 | 26.322 |
| 1/18/2011 14:04:01 | 29.811 | 1/16/2011 20:39:01 | 26.322 |
| 1/18/2011 14:24:01 | 28.376 | 1/16/2011 20:59:01 | 26.322 |
| 1/18/2011 14:44:01 | 29.000 | 1/16/2011 21:19:01 | 26.322 |
| 1/18/2011 15:04:01 | 29.000 | 1/16/2011 21:39:01 | 26.322 |
| 1/18/2011 15:24:01 | 28.563 | 1/16/2011 21:59:01 | 26.322 |
| 1/18/2011 15:44:01 | 28.063 | 1/16/2011 22:19:01 | 26.322 |
| 1/18/2011 16:04:01 | 27.876 | 1/16/2011 22:39:01 | 26.322 |
| 1/18/2011 16:24:01 | 27.314 | 1/16/2011 22:59:01 | 26.322 |
| 1/18/2011 16:44:01 | 27.064 | 1/16/2011 23:19:01 | 26.322 |
| 1/18/2011 17:04:01 | 26.877 | 1/16/2011 23:39:01 | 26.322 |
| 1/18/2011 17:24:01 | 26.502 | 1/16/2011 23:59:01 | 26.322 |
| 1/18/2011 17:44:01 | 26.564 | 1/17/2011 00:19:01 | 26.322 |
| 1/18/2011 18:04:01 | 26.752 | 1/17/2011 00:39:01 | 26.260 |
| 1/18/2011 18:24:01 | 26.689 | 1/17/2011 00:59:01 | 26.260 |
| 1/18/2011 18:44:01 | 26.377 | 1/17/2011 01:19:01 | 26.260 |

|                    |        |                    |        |
|--------------------|--------|--------------------|--------|
| 1/18/2011 19:04:01 | 26.002 | 1/17/2011 01:39:01 | 26.260 |
| 1/18/2011 19:24:01 | 25.689 | 1/17/2011 01:59:01 | 26.260 |
| 1/18/2011 19:44:01 | 25.564 | 1/17/2011 02:19:01 | 26.260 |
| 1/18/2011 20:04:01 | 25.314 | 1/17/2011 02:39:01 | 26.260 |
| 1/18/2011 20:24:01 | 25.252 | 1/17/2011 02:59:01 | 26.260 |
| 1/18/2011 20:44:01 | 25.064 | 1/17/2011 03:19:01 | 26.197 |
| 1/18/2011 21:04:01 | 24.814 | 1/17/2011 03:39:01 | 26.197 |
| 1/18/2011 21:24:01 | 24.752 | 1/17/2011 03:59:01 | 26.197 |
| 1/18/2011 21:44:01 | 24.689 | 1/17/2011 04:19:01 | 26.197 |
| 1/18/2011 22:04:01 | 24.564 | 1/17/2011 04:39:01 | 26.197 |
| 1/18/2011 22:24:01 | 24.564 | 1/17/2011 04:59:01 | 26.197 |
| 1/18/2011 22:44:01 | 24.439 | 1/17/2011 05:19:01 | 26.197 |
| 1/18/2011 23:04:01 | 24.377 | 1/17/2011 05:39:01 | 26.135 |
| 1/18/2011 23:24:01 | 24.502 | 1/17/2011 05:59:01 | 26.135 |
| 1/18/2011 23:44:01 | 23.564 | 1/17/2011 06:19:01 | 26.135 |
| 1/19/2011 00:04:01 | 22.563 | 1/17/2011 06:39:01 | 26.135 |
| 1/19/2011 00:24:01 | 22.376 | 1/17/2011 06:59:01 | 26.135 |
| 1/19/2011 00:44:01 | 22.438 | 1/17/2011 07:19:01 | 26.135 |
| 1/19/2011 01:04:01 | 22.501 | 1/17/2011 07:39:01 | 26.135 |
| 1/19/2011 01:24:01 | 22.626 | 1/17/2011 07:59:01 | 26.072 |
| 1/19/2011 01:44:01 | 22.751 | 1/17/2011 08:19:01 | 26.072 |
| 1/19/2011 02:04:01 | 22.751 | 1/17/2011 08:39:01 | 26.072 |
| 1/19/2011 02:24:01 | 22.688 | 1/17/2011 08:59:01 | 26.072 |
| 1/19/2011 02:44:01 | 22.626 | 1/17/2011 09:19:01 | 26.072 |
| 1/19/2011 03:04:01 | 22.438 | 1/17/2011 09:39:01 | 26.072 |
| 1/19/2011 03:24:01 | 22.313 | 1/17/2011 09:59:01 | 26.072 |
| 1/19/2011 03:44:01 | 22.188 | 1/17/2011 10:19:01 | 26.072 |
| 1/19/2011 04:04:01 | 22.063 | 1/17/2011 10:39:01 | 26.072 |
| 1/19/2011 04:24:01 | 21.938 | 1/17/2011 10:59:01 | 26.072 |
| 1/19/2011 04:44:01 | 21.813 | 1/17/2011 11:19:01 | 26.072 |
| 1/19/2011 05:04:01 | 21.625 | 1/17/2011 11:39:01 | 26.072 |
| 1/19/2011 05:24:01 | 21.187 | 1/17/2011 11:59:01 | 26.072 |
| 1/19/2011 05:44:01 | 20.874 | 1/17/2011 12:19:01 | 26.072 |
| 1/19/2011 06:04:01 | 20.749 | 1/17/2011 12:39:01 | 26.072 |
| 1/19/2011 06:24:01 | 20.937 | 1/17/2011 12:59:01 | 26.135 |
| 1/19/2011 06:44:01 | 21.187 | 1/17/2011 13:19:01 | 26.135 |
| 1/19/2011 07:04:01 | 21.375 | 1/17/2011 13:39:01 | 26.135 |
| 1/19/2011 07:24:01 | 21.813 | 1/17/2011 13:59:01 | 26.135 |
| 1/19/2011 07:44:01 | 22.313 | 1/17/2011 14:19:01 | 26.197 |
| 1/19/2011 08:04:01 | 22.688 | 1/17/2011 14:39:01 | 26.197 |
| 1/19/2011 08:24:01 | 23.376 | 1/17/2011 14:59:01 | 26.197 |
| 1/19/2011 08:44:01 | 24.564 | 1/17/2011 15:19:01 | 26.260 |
| 1/19/2011 09:04:01 | 25.314 | 1/17/2011 15:39:01 | 26.260 |
| 1/19/2011 09:24:01 | 25.439 | 1/17/2011 15:59:01 | 26.260 |
| 1/19/2011 09:44:01 | 26.502 | 1/17/2011 16:19:01 | 26.322 |
| 1/19/2011 10:04:01 | 26.064 | 1/17/2011 16:39:01 | 26.322 |
| 1/19/2011 10:24:01 | 26.814 | 1/17/2011 16:59:01 | 26.322 |
| 1/19/2011 10:44:01 | 28.376 | 1/17/2011 17:19:01 | 26.384 |
| 1/19/2011 11:04:01 | 29.250 | 1/17/2011 17:39:01 | 26.384 |
| 1/19/2011 11:24:01 | 29.624 | 1/17/2011 17:59:01 | 26.447 |

|                    |        |                    |        |
|--------------------|--------|--------------------|--------|
| 1/19/2011 11:44:01 | 30.685 | 1/17/2011 18:19:01 | 26.447 |
| 1/19/2011 12:04:01 | 31.621 | 1/17/2011 18:39:01 | 26.447 |
| 1/19/2011 12:24:01 | 32.245 | 1/17/2011 18:59:01 | 26.509 |
| 1/19/2011 12:44:01 | 32.993 | 1/17/2011 19:19:01 | 26.509 |
| 1/19/2011 13:04:01 | 33.180 | 1/17/2011 19:39:01 | 26.509 |
| 1/19/2011 13:24:01 | 33.118 | 1/17/2011 19:59:01 | 26.509 |
| 1/19/2011 13:44:01 | 33.242 | 1/17/2011 20:19:01 | 26.572 |
| 1/19/2011 14:04:01 | 33.180 | 1/17/2011 20:39:01 | 26.572 |
| 1/19/2011 14:24:01 | 32.806 | 1/17/2011 20:59:01 | 26.572 |
| 1/19/2011 14:44:01 | 33.367 | 1/17/2011 21:19:01 | 26.572 |
| 1/19/2011 15:04:01 | 33.305 | 1/17/2011 21:39:01 | 26.572 |
| 1/19/2011 15:24:01 | 32.432 | 1/17/2011 21:59:01 | 26.634 |
| 1/19/2011 15:44:01 | 31.434 | 1/17/2011 22:19:01 | 26.634 |
| 1/19/2011 16:04:01 | 31.122 | 1/17/2011 22:39:01 | 26.634 |
| 1/19/2011 16:24:01 | 30.623 | 1/17/2011 22:59:01 | 26.634 |
| 1/19/2011 16:44:01 | 29.624 | 1/17/2011 23:19:01 | 26.634 |
| 1/19/2011 17:04:01 | 29.062 | 1/17/2011 23:39:01 | 26.634 |
| 1/19/2011 17:24:01 | 28.376 | 1/17/2011 23:59:01 | 26.634 |
| 1/19/2011 17:44:01 | 27.938 | 1/18/2011 00:19:01 | 26.634 |
| 1/19/2011 18:04:01 | 27.501 | 1/18/2011 00:39:01 | 26.634 |
| 1/19/2011 18:24:01 | 27.064 | 1/18/2011 00:59:01 | 26.634 |
| 1/19/2011 18:44:01 | 26.564 | 1/18/2011 01:19:01 | 26.634 |
| 1/19/2011 19:04:01 | 26.127 | 1/18/2011 01:39:01 | 26.634 |
| 1/19/2011 19:24:01 | 25.877 | 1/18/2011 01:59:01 | 26.634 |
| 1/19/2011 19:44:01 | 25.752 | 1/18/2011 02:19:01 | 26.634 |
| 1/19/2011 20:04:01 | 24.752 | 1/18/2011 02:39:01 | 26.634 |
| 1/19/2011 20:24:01 | 24.314 | 1/18/2011 02:59:01 | 26.634 |
| 1/19/2011 20:44:01 | 23.501 | 1/18/2011 03:19:01 | 26.634 |
| 1/19/2011 21:04:01 | 23.126 | 1/18/2011 03:39:01 | 26.572 |
| 1/19/2011 21:24:01 | 23.064 | 1/18/2011 03:59:01 | 26.572 |
| 1/19/2011 21:44:01 | 22.501 | 1/18/2011 04:19:01 | 26.572 |
| 1/19/2011 22:04:01 | 22.251 | 1/18/2011 04:39:01 | 26.572 |
| 1/19/2011 22:24:01 | 22.313 | 1/18/2011 04:59:01 | 26.572 |
| 1/19/2011 22:44:01 | 22.251 | 1/18/2011 05:19:01 | 26.572 |
| 1/19/2011 23:04:01 | 22.251 | 1/18/2011 05:39:01 | 26.509 |
| 1/19/2011 23:24:01 | 22.313 | 1/18/2011 05:59:01 | 26.509 |
| 1/19/2011 23:44:01 | 22.376 | 1/18/2011 06:19:01 | 26.509 |
| 1/20/2011 00:04:01 | 22.376 | 1/18/2011 06:39:01 | 26.509 |
| 1/20/2011 00:24:01 | 22.313 | 1/18/2011 06:59:01 | 26.509 |
| 1/20/2011 00:44:01 | 22.438 | 1/18/2011 07:19:01 | 26.509 |
| 1/20/2011 01:04:01 | 22.501 | 1/18/2011 07:39:01 | 26.509 |
| 1/20/2011 01:24:01 | 22.563 | 1/18/2011 07:59:01 | 26.447 |
| 1/20/2011 01:44:01 | 22.876 | 1/18/2011 08:19:01 | 26.447 |
| 1/20/2011 02:04:01 | 22.626 | 1/18/2011 08:39:01 | 26.447 |
| 1/20/2011 02:24:01 | 22.376 | 1/18/2011 08:59:01 | 26.447 |
| 1/20/2011 02:44:01 | 22.313 | 1/18/2011 09:19:01 | 26.447 |
| 1/20/2011 03:04:01 | 22.313 | 1/18/2011 09:39:01 | 26.447 |
| 1/20/2011 03:24:01 | 22.376 | 1/18/2011 09:59:01 | 26.447 |
| 1/20/2011 03:44:01 | 22.188 | 1/18/2011 10:19:01 | 26.447 |
| 1/20/2011 04:04:01 | 22.000 | 1/18/2011 10:39:01 | 26.447 |

|                    |        |                    |        |
|--------------------|--------|--------------------|--------|
| 1/20/2011 04:24:01 | 21.938 | 1/18/2011 10:59:01 | 26.447 |
| 1/20/2011 04:44:01 | 21.813 | 1/18/2011 11:19:01 | 26.447 |
| 1/20/2011 05:04:01 | 21.625 | 1/18/2011 11:39:01 | 26.447 |
| 1/20/2011 05:24:01 | 21.562 | 1/18/2011 11:59:01 | 26.447 |
| 1/20/2011 05:44:01 | 21.500 | 1/18/2011 12:19:01 | 26.447 |
| 1/20/2011 06:04:01 | 21.625 | 1/18/2011 12:39:01 | 26.447 |
| 1/20/2011 06:24:01 | 21.813 | 1/18/2011 12:59:01 | 26.447 |
| 1/20/2011 06:44:01 | 22.188 | 1/18/2011 13:19:01 | 26.447 |
| 1/20/2011 07:04:01 | 22.501 | 1/18/2011 13:39:01 | 26.447 |
| 1/20/2011 07:24:01 | 23.376 | 1/18/2011 13:59:01 | 26.447 |
| 1/20/2011 07:44:01 | 24.002 | 1/18/2011 14:19:01 | 26.447 |
| 1/20/2011 08:04:01 | 24.877 | 1/18/2011 14:39:01 | 26.509 |
| 1/20/2011 08:24:01 | 25.689 | 1/18/2011 14:59:01 | 26.509 |
| 1/20/2011 08:44:01 | 26.189 | 1/18/2011 15:19:01 | 26.509 |
| 1/20/2011 09:04:01 | 26.314 | 1/18/2011 15:39:01 | 26.509 |
| 1/20/2011 09:24:01 | 27.126 | 1/18/2011 15:59:01 | 26.509 |
| 1/20/2011 09:44:01 | 27.501 | 1/18/2011 16:19:01 | 26.572 |
| 1/20/2011 10:04:01 | 27.938 | 1/18/2011 16:39:01 | 26.572 |
| 1/20/2011 10:24:01 | 27.876 | 1/18/2011 16:59:01 | 26.572 |
| 1/20/2011 10:44:01 | 29.125 | 1/18/2011 17:19:01 | 26.634 |
| 1/20/2011 11:04:01 | 30.248 | 1/18/2011 17:39:01 | 26.634 |
| 1/20/2011 11:24:01 | 30.935 | 1/18/2011 17:59:01 | 26.634 |
| 1/20/2011 11:44:01 | 32.307 | 1/18/2011 18:19:01 | 26.634 |
| 1/20/2011 12:04:01 | 32.182 | 1/18/2011 18:39:01 | 26.697 |
| 1/20/2011 12:24:01 | 31.309 | 1/18/2011 18:59:01 | 26.697 |
| 1/20/2011 12:44:01 | 30.186 | 1/18/2011 19:19:01 | 26.697 |
| 1/20/2011 13:04:01 | 31.683 | 1/18/2011 19:39:01 | 26.697 |
| 1/20/2011 13:24:01 | 31.184 | 1/18/2011 19:59:01 | 26.759 |
| 1/20/2011 13:44:01 | 32.868 | 1/18/2011 20:19:01 | 26.759 |
| 1/20/2011 14:04:01 | 33.554 | 1/18/2011 20:39:01 | 26.759 |
| 1/20/2011 14:24:01 | 32.931 | 1/18/2011 20:59:01 | 26.759 |
| 1/20/2011 14:44:01 | 32.993 | 1/18/2011 21:19:01 | 26.759 |
| 1/20/2011 15:04:01 | 33.305 | 1/18/2011 21:39:01 | 26.759 |
| 1/20/2011 15:24:01 | 32.307 | 1/18/2011 21:59:01 | 26.759 |
| 1/20/2011 15:44:01 | 31.558 | 1/18/2011 22:19:01 | 26.759 |
| 1/20/2011 16:04:01 | 30.872 | 1/18/2011 22:39:01 | 26.759 |
| 1/20/2011 16:24:01 | 29.874 | 1/18/2011 22:59:01 | 26.759 |
| 1/20/2011 16:44:01 | 29.250 | 1/18/2011 23:19:01 | 26.759 |
| 1/20/2011 17:04:01 | 28.813 | 1/18/2011 23:39:01 | 26.759 |
| 1/20/2011 17:24:01 | 28.376 | 1/18/2011 23:59:01 | 26.759 |
| 1/20/2011 17:44:01 | 27.938 | 1/19/2011 00:19:01 | 26.759 |
| 1/20/2011 18:04:01 | 27.314 | 1/19/2011 00:39:01 | 26.759 |
| 1/20/2011 18:24:01 | 26.814 | 1/19/2011 00:59:01 | 26.759 |
| 1/20/2011 18:44:01 | 27.064 | 1/19/2011 01:19:01 | 26.759 |
| 1/20/2011 19:04:01 | 27.064 | 1/19/2011 01:39:01 | 26.759 |
| 1/20/2011 19:24:01 | 26.627 | 1/19/2011 01:59:01 | 26.759 |
| 1/20/2011 19:44:01 | 26.064 | 1/19/2011 02:19:01 | 26.759 |
| 1/20/2011 20:04:01 | 25.752 | 1/19/2011 02:39:01 | 26.759 |
| 1/20/2011 20:24:01 | 25.439 | 1/19/2011 02:59:01 | 26.759 |
| 1/20/2011 20:44:01 | 25.189 | 1/19/2011 03:19:01 | 26.697 |

|                    |        |                    |        |
|--------------------|--------|--------------------|--------|
| 1/20/2011 21:04:01 | 25.064 | 1/19/2011 03:39:01 | 26.697 |
| 1/20/2011 21:24:01 | 24.877 | 1/19/2011 03:59:01 | 26.697 |
| 1/20/2011 21:44:01 | 24.814 | 1/19/2011 04:19:01 | 26.697 |
| 1/20/2011 22:04:01 | 24.689 | 1/19/2011 04:39:01 | 26.697 |
| 1/20/2011 22:24:01 | 24.752 | 1/19/2011 04:59:01 | 26.634 |
| 1/20/2011 22:44:01 | 24.814 | 1/19/2011 05:19:01 | 26.634 |
| 1/20/2011 23:04:01 | 25.002 | 1/19/2011 05:39:01 | 26.634 |
| 1/20/2011 23:24:01 | 25.064 | 1/19/2011 05:59:01 | 26.634 |
| 1/20/2011 23:44:01 | 23.752 | 1/19/2011 06:19:01 | 26.634 |
| 1/21/2011 00:04:01 | 23.189 | 1/19/2011 06:39:01 | 26.572 |
| 1/21/2011 00:24:01 | 22.688 | 1/19/2011 06:59:01 | 26.572 |
| 1/21/2011 00:44:01 | 22.376 | 1/19/2011 07:19:01 | 26.572 |
| 1/21/2011 01:04:01 | 22.251 | 1/19/2011 07:39:01 | 26.572 |
| 1/21/2011 01:24:01 | 22.063 | 1/19/2011 07:59:01 | 26.509 |
| 1/21/2011 01:44:01 | 22.063 | 1/19/2011 08:19:01 | 26.509 |
| 1/21/2011 02:04:01 | 21.813 | 1/19/2011 08:39:01 | 26.509 |
| 1/21/2011 02:24:01 | 21.750 | 1/19/2011 08:59:01 | 26.509 |
| 1/21/2011 02:44:01 | 21.750 | 1/19/2011 09:19:01 | 26.447 |
| 1/21/2011 03:04:01 | 21.813 | 1/19/2011 09:39:01 | 26.447 |
| 1/21/2011 03:24:01 | 21.875 | 1/19/2011 09:59:01 | 26.447 |
| 1/21/2011 03:44:01 | 21.938 | 1/19/2011 10:19:01 | 26.447 |
| 1/21/2011 04:04:01 | 21.938 | 1/19/2011 10:39:01 | 26.447 |
| 1/21/2011 04:24:01 | 21.813 | 1/19/2011 10:59:01 | 26.384 |
| 1/21/2011 04:44:01 | 21.562 | 1/19/2011 11:19:01 | 26.384 |
| 1/21/2011 05:04:01 | 21.249 | 1/19/2011 11:39:01 | 26.384 |
| 1/21/2011 05:24:01 | 20.999 | 1/19/2011 11:59:01 | 26.384 |
| 1/21/2011 05:44:01 | 20.937 | 1/19/2011 12:19:01 | 26.384 |
| 1/21/2011 06:04:01 | 20.999 | 1/19/2011 12:39:01 | 26.384 |
| 1/21/2011 06:24:01 | 21.187 | 1/19/2011 12:59:01 | 26.384 |
| 1/21/2011 06:44:01 | 21.562 | 1/19/2011 13:19:01 | 26.384 |
| 1/21/2011 07:04:01 | 21.938 | 1/19/2011 13:39:01 | 26.384 |
| 1/21/2011 07:24:01 | 22.376 | 1/19/2011 13:59:01 | 26.384 |
| 1/21/2011 07:44:01 | 22.688 | 1/19/2011 14:19:01 | 26.447 |
| 1/21/2011 08:04:01 | 23.126 | 1/19/2011 14:39:01 | 26.447 |
| 1/21/2011 08:24:01 | 23.814 | 1/19/2011 14:59:01 | 26.447 |
| 1/21/2011 08:44:01 | 24.377 | 1/19/2011 15:19:01 | 26.509 |
| 1/21/2011 09:04:01 | 25.814 | 1/19/2011 15:39:01 | 26.509 |
| 1/21/2011 09:24:01 | 26.189 | 1/19/2011 15:59:01 | 26.509 |
| 1/21/2011 09:44:01 | 26.064 | 1/19/2011 16:19:01 | 26.509 |
| 1/21/2011 10:04:01 | 26.252 | 1/19/2011 16:39:01 | 26.572 |
| 1/21/2011 10:24:01 | 27.189 | 1/19/2011 16:59:01 | 26.572 |
| 1/21/2011 10:44:01 | 27.626 | 1/19/2011 17:19:01 | 26.634 |
| 1/21/2011 11:04:01 | 27.938 | 1/19/2011 17:39:01 | 26.634 |
| 1/21/2011 11:24:01 | 29.687 | 1/19/2011 17:59:01 | 26.697 |
| 1/21/2011 11:44:01 | 29.312 | 1/19/2011 18:19:01 | 26.697 |
| 1/21/2011 12:04:01 | 28.750 | 1/19/2011 18:39:01 | 26.697 |
| 1/21/2011 12:24:01 | 29.936 | 1/19/2011 18:59:01 | 26.759 |
| 1/21/2011 12:44:01 | 30.373 | 1/19/2011 19:19:01 | 26.759 |
| 1/21/2011 13:04:01 | 31.808 | 1/19/2011 19:39:01 | 26.759 |
| 1/21/2011 13:24:01 | 31.808 | 1/19/2011 19:59:01 | 26.822 |

|                    |        |                    |        |
|--------------------|--------|--------------------|--------|
| 1/21/2011 13:44:01 | 32.432 | 1/19/2011 20:19:01 | 26.822 |
| 1/21/2011 14:04:01 | 32.245 | 1/19/2011 20:39:01 | 26.822 |
| 1/21/2011 14:24:01 | 31.122 | 1/19/2011 20:59:01 | 26.822 |
| 1/21/2011 14:44:01 | 29.250 | 1/19/2011 21:19:01 | 26.822 |
| 1/21/2011 15:04:01 | 29.499 | 1/19/2011 21:39:01 | 26.822 |
| 1/21/2011 15:24:01 | 30.248 | 1/19/2011 21:59:01 | 26.884 |
| 1/21/2011 15:44:01 | 30.373 | 1/19/2011 22:19:01 | 26.884 |
| 1/21/2011 16:04:01 | 29.125 | 1/19/2011 22:39:01 | 26.884 |
| 1/21/2011 16:24:01 | 28.500 | 1/19/2011 22:59:01 | 26.884 |
| 1/21/2011 16:44:01 | 28.188 | 1/19/2011 23:19:01 | 26.884 |
| 1/21/2011 17:04:01 | 28.001 | 1/19/2011 23:39:01 | 26.884 |
| 1/21/2011 17:24:01 | 26.564 | 1/19/2011 23:59:01 | 26.884 |
| 1/21/2011 17:44:01 | 25.877 | 1/20/2011 00:19:01 | 26.822 |
| 1/21/2011 18:04:01 | 25.502 | 1/20/2011 00:39:01 | 26.822 |
| 1/21/2011 18:24:01 | 25.127 | 1/20/2011 00:59:01 | 26.822 |
| 1/21/2011 18:44:01 | 24.877 | 1/20/2011 01:19:01 | 26.822 |
| 1/21/2011 19:04:01 | 24.502 | 1/20/2011 01:39:01 | 26.822 |
| 1/21/2011 19:24:01 | 24.189 | 1/20/2011 01:59:01 | 26.822 |
| 1/21/2011 19:44:01 | 23.877 | 1/20/2011 02:19:01 | 26.822 |
| 1/21/2011 20:04:01 | 23.939 | 1/20/2011 02:39:01 | 26.759 |
| 1/21/2011 20:24:01 | 24.189 | 1/20/2011 02:59:01 | 26.759 |
| 1/21/2011 20:44:01 | 24.377 | 1/20/2011 03:19:01 | 26.759 |
| 1/21/2011 21:04:01 | 24.377 | 1/20/2011 03:39:01 | 26.759 |
| 1/21/2011 21:24:01 | 24.314 | 1/20/2011 03:59:01 | 26.759 |
| 1/21/2011 21:44:01 | 24.127 | 1/20/2011 04:19:01 | 26.697 |
| 1/21/2011 22:04:01 | 23.814 | 1/20/2011 04:39:01 | 26.697 |
| 1/21/2011 22:24:01 | 23.501 | 1/20/2011 04:59:01 | 26.697 |
| 1/21/2011 22:44:01 | 23.314 | 1/20/2011 05:19:01 | 26.697 |
| 1/21/2011 23:04:01 | 23.126 | 1/20/2011 05:39:01 | 26.634 |
| 1/21/2011 23:24:01 | 22.814 | 1/20/2011 05:59:01 | 26.634 |
| 1/21/2011 23:44:01 | 22.563 | 1/20/2011 06:19:01 | 26.634 |
| 1/22/2011 00:04:01 | 22.438 | 1/20/2011 06:39:01 | 26.634 |
| 1/22/2011 00:24:01 | 22.313 | 1/20/2011 06:59:01 | 26.634 |
| 1/22/2011 00:44:01 | 22.125 | 1/20/2011 07:19:01 | 26.572 |
| 1/22/2011 01:04:01 | 21.938 | 1/20/2011 07:39:01 | 26.572 |
| 1/22/2011 01:24:01 | 21.875 | 1/20/2011 07:59:01 | 26.572 |
| 1/22/2011 01:44:01 | 21.813 | 1/20/2011 08:19:01 | 26.572 |
| 1/22/2011 02:04:01 | 21.750 | 1/20/2011 08:39:01 | 26.509 |
| 1/22/2011 02:24:01 | 21.625 | 1/20/2011 08:59:01 | 26.509 |
| 1/22/2011 02:44:01 | 21.562 | 1/20/2011 09:19:01 | 26.509 |
| 1/22/2011 03:04:01 | 21.437 | 1/20/2011 09:39:01 | 26.509 |
| 1/22/2011 03:24:01 | 21.312 | 1/20/2011 09:59:01 | 26.509 |
| 1/22/2011 03:44:01 | 21.375 | 1/20/2011 10:19:01 | 26.447 |
| 1/22/2011 04:04:01 | 21.437 | 1/20/2011 10:39:01 | 26.447 |
| 1/22/2011 04:24:01 | 21.312 | 1/20/2011 10:59:01 | 26.447 |
| 1/22/2011 04:44:01 | 21.187 | 1/20/2011 11:19:01 | 26.447 |
| 1/22/2011 05:04:01 | 21.187 | 1/20/2011 11:39:01 | 26.447 |
| 1/22/2011 05:24:01 | 21.437 | 1/20/2011 11:59:01 | 26.447 |
| 1/22/2011 05:44:01 | 21.687 | 1/20/2011 12:19:01 | 26.447 |
| 1/22/2011 06:04:01 | 21.938 | 1/20/2011 12:39:01 | 26.447 |

|                    |        |                    |        |
|--------------------|--------|--------------------|--------|
| 1/22/2011 06:24:01 | 22.251 | 1/20/2011 12:59:01 | 26.447 |
| 1/22/2011 06:44:01 | 22.563 | 1/20/2011 13:19:01 | 26.509 |
| 1/22/2011 07:04:01 | 23.001 | 1/20/2011 13:39:01 | 26.509 |
| 1/22/2011 07:24:01 | 23.501 | 1/20/2011 13:59:01 | 26.509 |
| 1/22/2011 07:44:01 | 24.377 | 1/20/2011 14:19:01 | 26.509 |
| 1/22/2011 08:04:01 | 25.127 | 1/20/2011 14:39:01 | 26.572 |
| 1/22/2011 08:24:01 | 26.064 | 1/20/2011 14:59:01 | 26.572 |
| 1/22/2011 08:44:01 | 27.002 | 1/20/2011 15:19:01 | 26.572 |
| 1/22/2011 09:04:01 | 27.564 | 1/20/2011 15:39:01 | 26.572 |
| 1/22/2011 09:24:01 | 28.188 | 1/20/2011 15:59:01 | 26.634 |
| 1/22/2011 09:44:01 | 29.250 | 1/20/2011 16:19:01 | 26.634 |
| 1/22/2011 10:04:01 | 30.248 | 1/20/2011 16:39:01 | 26.634 |
| 1/22/2011 10:24:01 | 30.935 | 1/20/2011 16:59:01 | 26.697 |
| 1/22/2011 10:44:01 | 31.496 | 1/20/2011 17:19:01 | 26.697 |
| 1/22/2011 11:04:01 | 32.245 | 1/20/2011 17:39:01 | 26.697 |
| 1/22/2011 11:24:01 | 32.556 | 1/20/2011 17:59:01 | 26.759 |
| 1/22/2011 11:44:01 | 32.494 | 1/20/2011 18:19:01 | 26.759 |
| 1/22/2011 12:04:01 | 29.936 | 1/20/2011 18:39:01 | 26.822 |
| 1/22/2011 12:24:01 | 31.808 | 1/20/2011 18:59:01 | 26.822 |
| 1/22/2011 12:44:01 | 30.935 | 1/20/2011 19:19:01 | 26.822 |
| 1/22/2011 13:04:01 | 29.874 | 1/20/2011 19:39:01 | 26.822 |
| 1/22/2011 13:24:01 | 30.685 | 1/20/2011 19:59:01 | 26.884 |
| 1/22/2011 13:44:01 | 31.558 | 1/20/2011 20:19:01 | 26.884 |
| 1/22/2011 14:04:01 | 32.120 | 1/20/2011 20:39:01 | 26.884 |
| 1/22/2011 14:24:01 | 30.123 | 1/20/2011 20:59:01 | 26.884 |
| 1/22/2011 14:44:01 | 29.374 | 1/20/2011 21:19:01 | 26.884 |
| 1/22/2011 15:04:01 | 29.374 | 1/20/2011 21:39:01 | 26.884 |
| 1/22/2011 15:24:01 | 28.438 | 1/20/2011 21:59:01 | 26.947 |
| 1/22/2011 15:44:01 | 27.751 | 1/20/2011 22:19:01 | 26.947 |
| 1/22/2011 16:04:01 | 27.439 | 1/20/2011 22:39:01 | 26.947 |
| 1/22/2011 16:24:01 | 27.189 | 1/20/2011 22:59:01 | 26.947 |
| 1/22/2011 16:44:01 | 27.126 | 1/20/2011 23:19:01 | 26.947 |
| 1/22/2011 17:04:01 | 27.064 | 1/20/2011 23:39:01 | 26.884 |
| 1/22/2011 17:24:01 | 26.877 | 1/20/2011 23:59:01 | 26.884 |
| 1/22/2011 17:44:01 | 26.814 | 1/21/2011 00:19:01 | 26.697 |
| 1/22/2011 18:04:01 | 26.502 | 1/21/2011 00:39:01 | 26.697 |
| 1/22/2011 18:24:01 | 26.002 | 1/21/2011 00:59:01 | 26.697 |
| 1/22/2011 18:44:01 | 25.564 | 1/21/2011 01:19:01 | 26.634 |
| 1/22/2011 19:04:01 | 25.064 | 1/21/2011 01:39:01 | 26.634 |
| 1/22/2011 19:24:01 | 24.752 | 1/21/2011 01:59:01 | 26.572 |
| 1/22/2011 19:44:01 | 24.564 | 1/21/2011 02:19:01 | 26.509 |
| 1/22/2011 20:04:01 | 24.377 | 1/21/2011 02:39:01 | 26.447 |
| 1/22/2011 20:24:01 | 24.252 | 1/21/2011 02:59:01 | 26.384 |
| 1/22/2011 20:44:01 | 24.252 | 1/21/2011 03:19:01 | 26.322 |
| 1/22/2011 21:04:01 | 24.127 | 1/21/2011 03:39:01 | 26.322 |
| 1/22/2011 21:24:01 | 24.189 | 1/21/2011 03:59:01 | 26.260 |
| 1/22/2011 21:44:01 | 24.189 | 1/21/2011 04:19:01 | 26.197 |
| 1/22/2011 22:04:01 | 24.314 | 1/21/2011 04:39:01 | 26.197 |
| 1/22/2011 22:24:01 | 24.439 | 1/21/2011 04:59:01 | 26.135 |
| 1/22/2011 22:44:01 | 24.502 | 1/21/2011 05:19:01 | 26.135 |

|                    |        |                    |        |
|--------------------|--------|--------------------|--------|
| 1/22/2011 23:04:01 | 24.314 | 1/21/2011 05:39:01 | 26.072 |
| 1/22/2011 23:24:01 | 24.314 | 1/21/2011 05:59:01 | 26.072 |
| 1/22/2011 23:44:01 | 24.127 | 1/21/2011 06:19:01 | 26.072 |
| 1/23/2011 00:04:01 | 23.814 | 1/21/2011 06:39:01 | 26.010 |
| 1/23/2011 00:24:01 | 23.564 | 1/21/2011 06:59:01 | 26.010 |
| 1/23/2011 00:44:01 | 23.376 | 1/21/2011 07:19:01 | 26.010 |
| 1/23/2011 01:04:01 | 23.314 | 1/21/2011 07:39:01 | 26.010 |
| 1/23/2011 01:24:01 | 23.376 | 1/21/2011 07:59:01 | 25.947 |
| 1/23/2011 01:44:01 | 23.376 | 1/21/2011 08:19:01 | 25.947 |
| 1/23/2011 02:04:01 | 23.376 | 1/21/2011 08:39:01 | 25.947 |
| 1/23/2011 02:24:01 | 23.314 | 1/21/2011 08:59:01 | 25.947 |
| 1/23/2011 02:44:01 | 23.126 | 1/21/2011 09:19:01 | 25.885 |
| 1/23/2011 03:04:01 | 23.001 | 1/21/2011 09:39:01 | 25.885 |
| 1/23/2011 03:24:01 | 22.939 | 1/21/2011 09:59:01 | 25.885 |
| 1/23/2011 03:44:01 | 22.688 | 1/21/2011 10:19:01 | 25.885 |
| 1/23/2011 04:04:01 | 22.376 | 1/21/2011 10:39:01 | 25.885 |
| 1/23/2011 04:24:01 | 22.188 | 1/21/2011 10:59:01 | 25.885 |
| 1/23/2011 04:44:01 | 21.938 | 1/21/2011 11:19:01 | 25.885 |
| 1/23/2011 05:04:01 | 21.813 | 1/21/2011 11:39:01 | 25.885 |
| 1/23/2011 05:24:01 | 21.687 | 1/21/2011 11:59:01 | 25.885 |
| 1/23/2011 05:44:01 | 21.562 | 1/21/2011 12:19:01 | 25.885 |
| 1/23/2011 06:04:01 | 21.562 | 1/21/2011 12:39:01 | 25.885 |
| 1/23/2011 06:24:01 | 21.875 | 1/21/2011 12:59:01 | 25.885 |
| 1/23/2011 06:44:01 | 22.188 | 1/21/2011 13:19:01 | 25.885 |
| 1/23/2011 07:04:01 | 23.001 | 1/21/2011 13:39:01 | 25.885 |
| 1/23/2011 07:24:01 | 24.002 | 1/21/2011 13:59:01 | 25.947 |
| 1/23/2011 07:44:01 | 25.064 | 1/21/2011 14:19:01 | 25.947 |
| 1/23/2011 08:04:01 | 26.127 | 1/21/2011 14:39:01 | 25.947 |
| 1/23/2011 08:24:01 | 27.376 | 1/21/2011 14:59:01 | 25.947 |
| 1/23/2011 08:44:01 | 27.938 | 1/21/2011 15:19:01 | 26.010 |
| 1/23/2011 09:04:01 | 28.376 | 1/21/2011 15:39:01 | 26.010 |
| 1/23/2011 09:24:01 | 29.062 | 1/21/2011 15:59:01 | 26.010 |
| 1/23/2011 09:44:01 | 29.936 | 1/21/2011 16:19:01 | 26.072 |
| 1/23/2011 10:04:01 | 30.810 | 1/21/2011 16:39:01 | 26.072 |
| 1/23/2011 10:24:01 | 31.746 | 1/21/2011 16:59:01 | 26.072 |
| 1/23/2011 10:44:01 | 30.997 | 1/21/2011 17:19:01 | 26.135 |
| 1/23/2011 11:04:01 | 31.995 | 1/21/2011 17:39:01 | 26.135 |
| 1/23/2011 11:24:01 | 33.055 | 1/21/2011 17:59:01 | 26.135 |
| 1/23/2011 11:44:01 | 33.367 | 1/21/2011 18:19:01 | 26.197 |
| 1/23/2011 12:04:01 | 32.494 | 1/21/2011 18:39:01 | 26.197 |
| 1/23/2011 12:24:01 | 30.747 | 1/21/2011 18:59:01 | 26.197 |
| 1/23/2011 12:44:01 | 30.373 | 1/21/2011 19:19:01 | 26.260 |
| 1/23/2011 13:04:01 | 32.681 | 1/21/2011 19:39:01 | 26.260 |
| 1/23/2011 13:24:01 | 29.187 | 1/21/2011 19:59:01 | 26.260 |
| 1/23/2011 13:44:01 | 27.314 | 1/21/2011 20:19:01 | 26.260 |
| 1/23/2011 14:04:01 | 27.126 | 1/21/2011 20:39:01 | 26.260 |
| 1/23/2011 14:24:01 | 29.187 | 1/21/2011 20:59:01 | 26.322 |
| 1/23/2011 14:44:01 | 27.564 | 1/21/2011 21:19:01 | 26.322 |
| 1/23/2011 15:04:01 | 27.002 | 1/21/2011 21:39:01 | 26.322 |
| 1/23/2011 15:24:01 | 27.064 | 1/21/2011 21:59:01 | 26.322 |



|                    |        |                    |        |
|--------------------|--------|--------------------|--------|
| 1/23/2011 15:44:01 | 27.126 | 1/21/2011 22:19:01 | 26.322 |
| 1/23/2011 16:04:01 | 27.751 | 1/21/2011 22:39:01 | 26.322 |
| 1/23/2011 16:24:01 | 27.876 | 1/21/2011 22:59:01 | 26.322 |
| 1/23/2011 16:44:01 | 27.938 | 1/21/2011 23:19:01 | 26.322 |
| 1/23/2011 17:04:01 | 28.063 | 1/21/2011 23:39:01 | 26.322 |
| 1/23/2011 17:24:01 | 27.626 | 1/21/2011 23:59:01 | 26.322 |
| 1/23/2011 17:44:01 | 27.251 | 1/22/2011 00:19:01 | 26.322 |
| 1/23/2011 18:04:01 | 27.189 | 1/22/2011 00:39:01 | 26.322 |
| 1/23/2011 18:24:01 | 26.752 | 1/22/2011 00:59:01 | 26.322 |
| 1/23/2011 18:44:01 | 26.189 | 1/22/2011 01:19:01 | 26.322 |
| 1/23/2011 19:04:01 | 25.939 | 1/22/2011 01:39:01 | 26.322 |
| 1/23/2011 19:24:01 | 25.564 | 1/22/2011 01:59:01 | 26.322 |
| 1/23/2011 19:44:01 | 25.127 | 1/22/2011 02:19:01 | 26.322 |
| 1/23/2011 20:04:01 | 24.627 | 1/22/2011 02:39:01 | 26.260 |
| 1/23/2011 20:24:01 | 24.252 | 1/22/2011 02:59:01 | 26.260 |
| 1/23/2011 20:44:01 | 23.877 | 1/22/2011 03:19:01 | 26.260 |
| 1/23/2011 21:04:01 | 23.689 | 1/22/2011 03:39:01 | 26.260 |
| 1/23/2011 21:24:01 | 23.627 | 1/22/2011 03:59:01 | 26.260 |
| 1/23/2011 21:44:01 | 23.689 | 1/22/2011 04:19:01 | 26.260 |
| 1/23/2011 22:04:01 | 23.627 | 1/22/2011 04:39:01 | 26.197 |
| 1/23/2011 22:24:01 | 23.501 | 1/22/2011 04:59:01 | 26.197 |
| 1/23/2011 22:44:01 | 23.501 | 1/22/2011 05:19:01 | 26.197 |
| 1/23/2011 23:04:01 | 23.501 | 1/22/2011 05:39:01 | 26.197 |
| 1/23/2011 23:24:01 | 23.501 | 1/22/2011 05:59:01 | 26.197 |
| 1/23/2011 23:44:01 | 23.689 | 1/22/2011 06:19:01 | 26.197 |
| 1/24/2011 00:04:01 | 23.627 | 1/22/2011 06:39:01 | 26.135 |
| 1/24/2011 00:24:01 | 23.689 | 1/22/2011 06:59:01 | 26.135 |
| 1/24/2011 00:44:01 | 23.752 | 1/22/2011 07:19:01 | 26.135 |
| 1/24/2011 01:04:01 | 23.752 | 1/22/2011 07:39:01 | 26.135 |
| 1/24/2011 01:24:01 | 23.814 | 1/22/2011 07:59:01 | 26.135 |
| 1/24/2011 01:44:01 | 23.501 | 1/22/2011 08:19:01 | 26.072 |
| 1/24/2011 02:04:01 | 23.126 | 1/22/2011 08:39:01 | 26.072 |
| 1/24/2011 02:24:01 | 22.939 | 1/22/2011 08:59:01 | 26.072 |
| 1/24/2011 02:44:01 | 22.751 | 1/22/2011 09:19:01 | 26.072 |
| 1/24/2011 03:04:01 | 22.626 | 1/22/2011 09:39:01 | 26.072 |
| 1/24/2011 03:24:01 | 22.563 | 1/22/2011 09:59:01 | 26.072 |
| 1/24/2011 03:44:01 | 22.501 | 1/22/2011 10:19:01 | 26.072 |
| 1/24/2011 04:04:01 | 22.563 | 1/22/2011 10:39:01 | 26.072 |
| 1/24/2011 04:24:01 | 22.563 | 1/22/2011 10:59:01 | 26.072 |
| 1/24/2011 04:44:01 | 22.563 | 1/22/2011 11:19:01 | 26.010 |
| 1/24/2011 05:04:01 | 22.563 | 1/22/2011 11:39:01 | 26.010 |
| 1/24/2011 05:24:01 | 22.563 | 1/22/2011 11:59:01 | 26.072 |
| 1/24/2011 05:44:01 | 22.501 | 1/22/2011 12:19:01 | 26.072 |
| 1/24/2011 06:04:01 | 22.563 | 1/22/2011 12:39:01 | 26.072 |
| 1/24/2011 06:24:01 | 22.751 | 1/22/2011 12:59:01 | 26.072 |
| 1/24/2011 06:44:01 | 23.064 | 1/22/2011 13:19:01 | 26.072 |
| 1/24/2011 07:04:01 | 23.251 | 1/22/2011 13:39:01 | 26.072 |
| 1/24/2011 07:24:01 | 23.627 | 1/22/2011 13:59:01 | 26.135 |
| 1/24/2011 07:44:01 | 23.939 | 1/22/2011 14:19:01 | 26.135 |
| 1/24/2011 08:04:01 | 24.127 | 1/22/2011 14:39:01 | 26.135 |

|                    |        |                    |        |
|--------------------|--------|--------------------|--------|
| 1/24/2011 08:24:01 | 24.439 | 1/22/2011 14:59:01 | 26.197 |
| 1/24/2011 08:44:01 | 24.939 | 1/22/2011 15:19:01 | 26.197 |
| 1/24/2011 09:04:01 | 25.439 | 1/22/2011 15:39:01 | 26.197 |
| 1/24/2011 09:24:01 | 25.752 | 1/22/2011 15:59:01 | 26.197 |
| 1/24/2011 09:44:01 | 26.377 | 1/22/2011 16:19:01 | 26.260 |
| 1/24/2011 10:04:01 | 26.939 | 1/22/2011 16:39:01 | 26.260 |
| 1/24/2011 10:24:01 | 27.376 | 1/22/2011 16:59:01 | 26.260 |
| 1/24/2011 10:44:01 | 28.251 | 1/22/2011 17:19:01 | 26.322 |
| 1/24/2011 11:04:01 | 28.313 | 1/22/2011 17:39:01 | 26.322 |
| 1/24/2011 11:24:01 | 27.376 | 1/22/2011 17:59:01 | 26.322 |
| 1/24/2011 11:44:01 | 27.938 | 1/22/2011 18:19:01 | 26.322 |
| 1/24/2011 12:04:01 | 28.625 | 1/22/2011 18:39:01 | 26.384 |
| 1/24/2011 12:24:01 | 28.750 | 1/22/2011 18:59:01 | 26.384 |
| 1/24/2011 12:44:01 | 28.063 | 1/22/2011 19:19:01 | 26.384 |
| 1/24/2011 13:04:01 | 29.374 | 1/22/2011 19:39:01 | 26.384 |
| 1/24/2011 13:24:01 | 29.125 | 1/22/2011 19:59:01 | 26.384 |
| 1/24/2011 13:44:01 | 28.625 | 1/22/2011 20:19:01 | 26.384 |
| 1/24/2011 14:04:01 | 30.373 | 1/22/2011 20:39:01 | 26.447 |
| 1/24/2011 14:24:01 | 31.683 | 1/22/2011 20:59:01 | 26.447 |
| 1/24/2011 14:44:01 | 31.808 | 1/22/2011 21:19:01 | 26.447 |
| 1/24/2011 15:04:01 | 31.059 | 1/22/2011 21:39:01 | 26.447 |
| 1/24/2011 15:24:01 | 30.311 | 1/22/2011 21:59:01 | 26.447 |
| 1/24/2011 15:44:01 | 30.311 | 1/22/2011 22:19:01 | 26.447 |
| 1/24/2011 16:04:01 | 29.874 | 1/22/2011 22:39:01 | 26.447 |
| 1/24/2011 16:24:01 | 29.437 | 1/22/2011 22:59:01 | 26.447 |
| 1/24/2011 16:44:01 | 29.125 | 1/22/2011 23:19:01 | 26.447 |
| 1/24/2011 17:04:01 | 28.188 | 1/22/2011 23:39:01 | 26.447 |
| 1/24/2011 17:24:01 | 27.689 | 1/22/2011 23:59:01 | 26.447 |
| 1/24/2011 17:44:01 | 27.626 | 1/23/2011 00:19:01 | 26.447 |
| 1/24/2011 18:04:01 | 27.501 | 1/23/2011 00:39:01 | 26.447 |
| 1/24/2011 18:24:01 | 27.064 | 1/23/2011 00:59:01 | 26.384 |
| 1/24/2011 18:44:01 | 26.564 | 1/23/2011 01:19:01 | 26.384 |
| 1/24/2011 19:04:01 | 25.939 | 1/23/2011 01:39:01 | 26.384 |
| 1/24/2011 19:24:01 | 25.439 | 1/23/2011 01:59:01 | 26.384 |
| 1/24/2011 19:44:01 | 25.127 | 1/23/2011 02:19:01 | 26.384 |
| 1/24/2011 20:04:01 | 24.939 | 1/23/2011 02:39:01 | 26.384 |
| 1/24/2011 20:24:01 | 24.814 | 1/23/2011 02:59:01 | 26.384 |
| 1/24/2011 20:44:01 | 24.502 | 1/23/2011 03:19:01 | 26.384 |
| 1/24/2011 21:04:01 | 24.314 | 1/23/2011 03:39:01 | 26.384 |
| 1/24/2011 21:24:01 | 24.252 | 1/23/2011 03:59:01 | 26.384 |
| 1/24/2011 21:44:01 | 24.189 | 1/23/2011 04:19:01 | 26.384 |
| 1/24/2011 22:04:01 | 24.189 | 1/23/2011 04:39:01 | 26.384 |
| 1/24/2011 22:24:01 | 24.127 | 1/23/2011 04:59:01 | 26.384 |
| 1/24/2011 22:44:01 | 24.189 | 1/23/2011 05:19:01 | 26.322 |
| 1/24/2011 23:04:01 | 24.127 | 1/23/2011 05:39:01 | 26.322 |
| 1/24/2011 23:24:01 | 24.127 | 1/23/2011 05:59:01 | 26.322 |
| 1/24/2011 23:44:01 | 24.127 | 1/23/2011 06:19:01 | 26.322 |
| 1/25/2011 00:04:01 | 24.189 | 1/23/2011 06:39:01 | 26.322 |
| 1/25/2011 00:24:01 | 24.127 | 1/23/2011 06:59:01 | 26.322 |
| 1/25/2011 00:44:01 | 24.002 | 1/23/2011 07:19:01 | 26.322 |

|                    |        |                    |        |
|--------------------|--------|--------------------|--------|
| 1/25/2011 01:04:01 | 24.002 | 1/23/2011 07:39:01 | 26.260 |
| 1/25/2011 01:24:01 | 24.002 | 1/23/2011 07:59:01 | 26.260 |
| 1/25/2011 01:44:01 | 23.877 | 1/23/2011 08:19:01 | 26.260 |
| 1/25/2011 02:04:01 | 23.877 | 1/23/2011 08:39:01 | 26.260 |
| 1/25/2011 02:24:01 | 23.814 | 1/23/2011 08:59:01 | 26.260 |
| 1/25/2011 02:44:01 | 23.814 | 1/23/2011 09:19:01 | 26.260 |
| 1/25/2011 03:04:01 | 23.752 | 1/23/2011 09:39:01 | 26.197 |
| 1/25/2011 03:24:01 | 23.689 | 1/23/2011 09:59:01 | 26.197 |
| 1/25/2011 03:44:01 | 23.877 | 1/23/2011 10:19:01 | 26.197 |
| 1/25/2011 04:04:01 | 24.002 | 1/23/2011 10:39:01 | 26.197 |
| 1/25/2011 04:24:01 | 24.002 | 1/23/2011 10:59:01 | 26.197 |
| 1/25/2011 04:44:01 | 24.064 | 1/23/2011 11:19:01 | 26.197 |
| 1/25/2011 05:04:01 | 24.127 | 1/23/2011 11:39:01 | 26.197 |
| 1/25/2011 05:24:01 | 23.939 | 1/23/2011 11:59:01 | 26.197 |
| 1/25/2011 05:44:01 | 23.814 | 1/23/2011 12:19:01 | 26.197 |
| 1/25/2011 06:04:01 | 23.627 | 1/23/2011 12:39:01 | 26.197 |
| 1/25/2011 06:24:01 | 23.689 | 1/23/2011 12:59:01 | 26.260 |
| 1/25/2011 06:44:01 | 23.877 | 1/23/2011 13:19:01 | 26.260 |
| 1/25/2011 07:04:01 | 24.064 | 1/23/2011 13:39:01 | 26.260 |
| 1/25/2011 07:24:01 | 24.502 | 1/23/2011 13:59:01 | 26.260 |
| 1/25/2011 07:44:01 | 24.814 | 1/23/2011 14:19:01 | 26.322 |
| 1/25/2011 08:04:01 | 25.189 | 1/23/2011 14:39:01 | 26.322 |
| 1/25/2011 08:24:01 | 25.564 | 1/23/2011 14:59:01 | 26.322 |
| 1/25/2011 08:44:01 | 25.752 | 1/23/2011 15:19:01 | 26.322 |
| 1/25/2011 09:04:01 | 25.689 | 1/23/2011 15:39:01 | 26.384 |
| 1/25/2011 09:24:01 | 25.939 | 1/23/2011 15:59:01 | 26.384 |
| 1/25/2011 09:44:01 | 26.314 | 1/23/2011 16:19:01 | 26.384 |
| 1/25/2011 10:04:01 | 26.939 | 1/23/2011 16:39:01 | 26.384 |
| 1/25/2011 10:24:01 | 27.626 | 1/23/2011 16:59:01 | 26.447 |
| 1/25/2011 10:44:01 | 28.688 | 1/23/2011 17:19:01 | 26.447 |
| 1/25/2011 11:04:01 | 28.875 | 1/23/2011 17:39:01 | 26.447 |
| 1/25/2011 11:24:01 | 29.874 | 1/23/2011 18:15:01 | 25.617 |
| 1/25/2011 11:44:01 | 29.187 | 1/23/2011 18:35:01 | 25.617 |
| 1/25/2011 12:04:01 | 28.313 | 1/23/2011 18:55:01 | 25.617 |
| 1/25/2011 12:24:01 | 27.064 | 1/23/2011 19:15:01 | 25.617 |
| 1/25/2011 12:44:01 | 26.314 | 1/23/2011 19:35:01 | 25.617 |
| 1/25/2011 13:04:01 | 26.189 | 1/23/2011 19:55:01 | 25.617 |
| 1/25/2011 13:24:01 | 26.189 | 1/23/2011 20:15:01 | 25.617 |
| 1/25/2011 13:44:01 | 26.627 | 1/23/2011 20:35:01 | 25.617 |
| 1/25/2011 14:04:01 | 26.689 | 1/23/2011 20:55:01 | 25.617 |
| 1/25/2011 14:24:01 | 26.439 | 1/23/2011 21:15:01 | 25.617 |
| 1/25/2011 14:44:01 | 27.002 | 1/23/2011 21:35:01 | 25.617 |
| 1/25/2011 15:04:01 | 28.001 | 1/23/2011 21:55:01 | 25.617 |
| 1/27/2011 16:06:01 | 24.961 | 1/23/2011 22:15:01 | 25.554 |
| 1/27/2011 16:26:01 | 24.899 | 1/23/2011 22:35:01 | 25.554 |
| 1/27/2011 16:46:01 | 24.899 | 1/23/2011 22:55:01 | 25.554 |
| 1/27/2011 17:06:01 | 24.899 | 1/23/2011 23:15:01 | 25.554 |
| 1/27/2011 17:26:01 | 24.648 | 1/23/2011 23:35:01 | 25.554 |
| 1/27/2011 17:46:01 | 24.398 | 1/23/2011 23:55:01 | 25.554 |
| 1/27/2011 18:06:01 | 23.836 | 1/24/2011 00:15:01 | 25.492 |

|                    |        |                    |        |
|--------------------|--------|--------------------|--------|
| 1/27/2011 18:26:01 | 23.461 | 1/24/2011 00:35:01 | 25.492 |
| 1/27/2011 18:46:01 | 23.336 | 1/24/2011 00:55:01 | 25.492 |
| 1/27/2011 19:06:01 | 23.086 | 1/24/2011 01:15:01 | 25.492 |
| 1/27/2011 19:26:01 | 22.773 | 1/24/2011 01:35:01 | 25.492 |
| 1/27/2011 19:46:01 | 22.710 | 1/24/2011 01:55:01 | 25.429 |
| 1/27/2011 20:06:01 | 22.648 | 1/24/2011 02:15:01 | 25.429 |
| 1/27/2011 20:26:01 | 22.648 | 1/24/2011 02:35:01 | 25.429 |
| 1/27/2011 20:46:01 | 22.648 | 1/24/2011 02:55:01 | 25.429 |
| 1/27/2011 21:06:01 | 22.585 | 1/24/2011 03:15:01 | 25.429 |
| 1/27/2011 21:26:01 | 22.523 | 1/24/2011 03:35:01 | 25.429 |
| 1/27/2011 21:46:01 | 22.335 | 1/24/2011 03:55:01 | 25.367 |
| 1/27/2011 22:06:01 | 22.147 | 1/24/2011 04:15:01 | 25.367 |
| 1/27/2011 22:26:01 | 22.147 | 1/24/2011 04:35:01 | 25.367 |
| 1/27/2011 22:46:01 | 22.147 | 1/24/2011 04:55:01 | 25.367 |
| 1/27/2011 23:06:01 | 22.022 | 1/24/2011 05:15:01 | 25.304 |
| 1/27/2011 23:26:01 | 22.022 | 1/24/2011 05:35:01 | 25.304 |
| 1/27/2011 23:46:01 | 21.960 | 1/24/2011 05:55:01 | 25.304 |
| 1/28/2011 00:06:01 | 21.835 | 1/24/2011 06:15:01 | 25.304 |
| 1/28/2011 00:26:01 | 21.835 | 1/24/2011 06:35:01 | 25.242 |
| 1/28/2011 00:46:01 | 21.897 | 1/24/2011 06:55:01 | 25.242 |
| 1/28/2011 01:06:01 | 21.960 | 1/24/2011 07:15:01 | 25.242 |
| 1/28/2011 01:26:01 | 21.897 | 1/24/2011 07:35:01 | 25.242 |
| 1/28/2011 01:46:01 | 21.897 | 1/24/2011 07:55:01 | 25.242 |
| 1/28/2011 02:06:01 | 21.960 | 1/24/2011 08:15:01 | 25.179 |
| 1/28/2011 02:26:01 | 22.022 | 1/24/2011 08:35:01 | 25.179 |
| 1/28/2011 02:46:01 | 22.085 | 1/24/2011 08:55:01 | 25.179 |
| 1/28/2011 03:06:01 | 22.147 | 1/24/2011 09:15:01 | 25.179 |
| 1/28/2011 03:26:01 | 22.210 | 1/24/2011 09:35:01 | 25.179 |
| 1/28/2011 03:46:01 | 22.335 | 1/24/2011 09:55:01 | 25.179 |
| 1/28/2011 04:06:01 | 22.335 | 1/24/2011 10:15:01 | 25.117 |
| 1/28/2011 04:26:01 | 22.210 | 1/24/2011 10:35:01 | 25.179 |
| 1/28/2011 04:46:01 | 22.147 | 1/24/2011 10:55:01 | 25.117 |
| 1/28/2011 05:06:01 | 22.147 | 1/24/2011 11:15:01 | 25.117 |
| 1/28/2011 05:26:01 | 22.147 | 1/24/2011 11:35:01 | 25.117 |
| 1/28/2011 05:46:01 | 22.210 | 1/24/2011 11:55:01 | 25.117 |
| 1/28/2011 06:06:01 | 22.273 | 1/24/2011 12:15:01 | 25.179 |
| 1/28/2011 06:26:01 | 22.335 | 1/24/2011 12:35:01 | 25.179 |
| 1/28/2011 06:46:01 | 22.710 | 1/24/2011 12:55:01 | 25.179 |
| 1/28/2011 07:06:01 | 23.023 | 1/24/2011 13:15:01 | 25.179 |
| 1/28/2011 07:26:01 | 23.211 | 1/24/2011 13:35:01 | 25.179 |
| 1/28/2011 07:46:01 | 23.461 | 1/24/2011 13:55:01 | 25.179 |
| 1/28/2011 08:06:01 | 24.148 | 1/24/2011 14:15:01 | 25.242 |
| 1/28/2011 08:26:01 | 24.023 | 1/24/2011 14:35:01 | 25.242 |
| 1/28/2011 08:46:01 | 24.586 | 1/24/2011 14:55:01 | 25.242 |
| 1/28/2011 09:06:01 | 25.211 | 1/24/2011 15:15:01 | 25.242 |
| 1/28/2011 09:26:01 | 25.649 | 1/24/2011 15:35:01 | 25.304 |
| 1/28/2011 09:46:01 | 25.586 | 1/24/2011 15:55:01 | 25.304 |
| 1/28/2011 10:06:01 | 25.711 | 1/24/2011 16:15:01 | 25.304 |
| 1/28/2011 10:26:01 | 26.148 | 1/24/2011 16:35:01 | 25.304 |
| 1/28/2011 10:46:01 | 26.461 | 1/24/2011 16:55:01 | 25.367 |

|                    |        |                    |        |
|--------------------|--------|--------------------|--------|
| 1/28/2011 11:06:01 | 26.086 | 1/24/2011 17:15:01 | 25.367 |
| 1/28/2011 11:26:01 | 26.461 | 1/24/2011 17:35:01 | 25.367 |
| 1/28/2011 11:46:01 | 27.086 | 1/24/2011 17:55:01 | 25.429 |
| 1/28/2011 12:06:01 | 27.461 | 1/24/2011 18:15:01 | 25.429 |
| 1/28/2011 12:26:01 | 27.586 | 1/24/2011 18:35:01 | 25.429 |
| 1/28/2011 12:46:01 | 27.710 | 1/24/2011 18:55:01 | 25.492 |
| 1/28/2011 13:06:01 | 27.398 | 1/24/2011 19:15:01 | 25.492 |
| 1/28/2011 13:26:01 | 28.210 | 1/24/2011 19:35:01 | 25.492 |
| 1/28/2011 13:46:01 | 27.648 | 1/24/2011 19:55:01 | 25.492 |
| 1/28/2011 14:06:01 | 26.836 | 1/24/2011 20:15:01 | 25.492 |
| 1/28/2011 14:26:01 | 25.961 | 1/24/2011 20:35:01 | 25.492 |
| 1/28/2011 14:46:01 | 24.836 | 1/24/2011 20:55:01 | 25.492 |
| 1/28/2011 15:06:01 | 24.523 | 1/24/2011 21:15:01 | 25.492 |
| 1/28/2011 15:26:01 | 24.523 | 1/24/2011 21:35:01 | 25.492 |
| 1/28/2011 15:46:01 | 24.211 | 1/24/2011 21:55:01 | 25.554 |
| 1/28/2011 16:06:01 | 24.461 | 1/24/2011 22:15:01 | 25.492 |
| 1/28/2011 16:26:01 | 24.586 | 1/24/2011 22:35:01 | 25.492 |
| 1/28/2011 16:46:01 | 24.648 | 1/24/2011 22:55:01 | 25.492 |
| 1/28/2011 17:06:01 | 24.336 | 1/24/2011 23:15:01 | 25.492 |
| 1/28/2011 17:26:01 | 24.336 | 1/24/2011 23:35:01 | 25.492 |
| 1/28/2011 17:46:01 | 24.461 | 1/24/2011 23:55:01 | 25.492 |
| 1/28/2011 18:06:01 | 24.586 | 1/25/2011 00:15:01 | 25.492 |
| 1/28/2011 18:26:01 | 24.398 | 1/25/2011 00:35:01 | 25.492 |
| 1/28/2011 18:46:01 | 24.211 | 1/25/2011 00:55:01 | 25.492 |
| 1/28/2011 19:06:01 | 24.023 | 1/25/2011 01:15:01 | 25.429 |
| 1/28/2011 19:26:01 | 24.023 | 1/25/2011 01:35:01 | 25.429 |
| 1/28/2011 19:46:01 | 23.961 | 1/25/2011 01:55:01 | 25.429 |
| 1/28/2011 20:06:01 | 23.898 | 1/25/2011 02:15:01 | 25.429 |
| 1/28/2011 20:26:01 | 23.836 | 1/25/2011 02:35:01 | 25.429 |
| 1/28/2011 20:46:01 | 23.648 | 1/25/2011 02:55:01 | 25.429 |
| 1/28/2011 21:06:01 | 23.648 | 1/25/2011 03:15:01 | 25.429 |
| 1/28/2011 21:26:01 | 23.461 | 1/25/2011 03:35:01 | 25.429 |
| 1/28/2011 21:46:01 | 23.336 | 1/25/2011 03:55:01 | 25.367 |
| 1/28/2011 22:06:01 | 23.211 | 1/25/2011 04:15:01 | 25.367 |
| 1/28/2011 22:26:01 | 23.273 | 1/25/2011 04:35:01 | 25.367 |
| 1/28/2011 22:46:01 | 23.398 | 1/25/2011 04:55:01 | 25.367 |
| 1/28/2011 23:06:01 | 23.398 | 1/25/2011 05:15:01 | 25.367 |
| 1/28/2011 23:26:01 | 23.336 | 1/25/2011 05:35:01 | 25.367 |
| 1/28/2011 23:46:01 | 23.336 | 1/25/2011 05:55:01 | 25.367 |
| 1/29/2011 00:06:01 | 23.273 | 1/25/2011 06:15:01 | 25.367 |
| 1/29/2011 00:26:01 | 23.211 | 1/25/2011 06:35:01 | 25.304 |
| 1/29/2011 00:46:01 | 23.086 | 1/25/2011 06:55:01 | 25.304 |
| 1/29/2011 01:06:01 | 23.211 | 1/25/2011 07:15:01 | 25.304 |
| 1/29/2011 01:26:01 | 23.211 | 1/25/2011 07:35:01 | 25.304 |
| 1/29/2011 01:46:01 | 23.273 | 1/25/2011 07:55:01 | 25.304 |
| 1/29/2011 02:06:01 | 23.273 | 1/25/2011 08:15:01 | 25.304 |
| 1/29/2011 02:26:01 | 23.211 | 1/25/2011 08:35:01 | 25.304 |
| 1/29/2011 02:46:01 | 23.211 | 1/25/2011 08:55:01 | 25.304 |
| 1/29/2011 03:06:01 | 23.273 | 1/25/2011 09:15:01 | 25.304 |
| 1/29/2011 03:26:01 | 22.398 | 1/25/2011 09:35:01 | 25.242 |

|                    |        |                    |        |
|--------------------|--------|--------------------|--------|
| 1/29/2011 03:46:01 | 21.585 | 1/25/2011 09:55:01 | 25.242 |
| 1/29/2011 04:06:01 | 21.459 | 1/25/2011 10:15:01 | 25.242 |
| 1/29/2011 04:26:01 | 21.397 | 1/25/2011 10:35:01 | 25.242 |
| 1/29/2011 04:46:01 | 21.397 | 1/25/2011 10:55:01 | 25.242 |
| 1/29/2011 05:06:01 | 21.397 | 1/25/2011 11:15:01 | 25.242 |
| 1/29/2011 05:26:01 | 21.459 | 1/25/2011 11:35:01 | 25.304 |
| 1/29/2011 05:46:01 | 21.459 | 1/25/2011 11:55:01 | 25.304 |
| 1/29/2011 06:06:01 | 21.522 | 1/25/2011 12:15:01 | 25.304 |
| 1/29/2011 06:26:01 | 21.647 | 1/25/2011 12:35:01 | 25.304 |
| 1/29/2011 06:46:01 | 21.647 | 1/25/2011 12:55:01 | 25.304 |
| 1/29/2011 07:06:01 | 21.835 | 1/25/2011 13:15:01 | 25.304 |
| 1/29/2011 07:26:01 | 22.147 | 1/25/2011 13:35:01 | 25.367 |
| 1/29/2011 07:46:01 | 22.460 | 1/25/2011 13:55:01 | 25.367 |
| 1/29/2011 08:06:01 | 22.648 | 1/25/2011 14:15:01 | 25.367 |
| 1/29/2011 08:26:01 | 23.148 | 1/25/2011 14:35:01 | 25.367 |
| 1/29/2011 08:46:01 | 23.711 | 1/25/2011 14:55:01 | 25.367 |
| 1/29/2011 09:06:01 | 24.273 | 1/25/2011 15:15:01 | 25.429 |
| 1/29/2011 09:26:01 | 24.398 | 1/25/2011 15:35:01 | 25.429 |
| 1/29/2011 09:46:01 | 24.899 | 1/25/2011 15:55:01 | 25.429 |
| 1/29/2011 10:06:01 | 25.399 | 1/25/2011 16:15:01 | 25.429 |
| 1/29/2011 10:26:01 | 26.273 | 1/25/2011 16:35:01 | 25.429 |
| 1/29/2011 10:46:01 | 26.523 | 1/25/2011 16:55:01 | 25.492 |
| 1/29/2011 11:06:01 | 26.398 | 1/25/2011 17:15:01 | 25.492 |
| 1/29/2011 11:26:01 | 27.023 | 1/25/2011 17:35:01 | 25.492 |
| 1/29/2011 11:46:01 | 27.273 | 1/25/2011 17:55:01 | 25.492 |
| 1/29/2011 12:06:01 | 27.023 | 1/25/2011 18:15:01 | 25.492 |
| 1/29/2011 12:26:01 | 28.273 | 1/25/2011 18:35:01 | 25.492 |
| 1/29/2011 12:46:01 | 27.461 | 1/25/2011 18:55:01 | 25.492 |
| 1/29/2011 13:06:01 | 27.398 | 1/25/2011 19:15:01 | 25.554 |
| 1/29/2011 13:26:01 | 27.586 | 1/25/2011 19:35:01 | 25.554 |
| 1/29/2011 13:46:01 | 26.961 | 1/25/2011 19:55:01 | 25.554 |
| 1/29/2011 14:06:01 | 25.774 | 1/25/2011 20:15:01 | 25.554 |
| 1/29/2011 14:26:01 | 26.148 | 1/25/2011 20:35:01 | 25.554 |
| 1/29/2011 14:46:01 | 24.211 | 1/25/2011 20:55:01 | 25.554 |
| 1/29/2011 15:06:01 | 22.460 | 1/25/2011 21:15:01 | 25.554 |
| 1/29/2011 15:26:01 | 22.335 | 1/25/2011 21:35:01 | 25.554 |
| 1/29/2011 15:46:01 | 22.460 | 1/25/2011 21:55:01 | 25.554 |
| 1/29/2011 16:06:01 | 22.585 | 1/25/2011 22:15:01 | 25.554 |
| 1/29/2011 16:26:01 | 22.585 | 1/25/2011 22:35:01 | 25.492 |
| 1/29/2011 16:46:01 | 22.523 | 1/25/2011 22:55:01 | 25.492 |
| 1/29/2011 17:06:01 | 22.460 | 1/25/2011 23:15:01 | 25.492 |
| 1/29/2011 17:26:01 | 22.398 | 1/25/2011 23:35:01 | 25.492 |
| 1/29/2011 17:46:01 | 22.335 | 1/25/2011 23:55:01 | 25.492 |
| 1/29/2011 18:06:01 | 22.147 | 1/26/2011 00:15:01 | 25.492 |
| 1/29/2011 18:26:01 | 22.210 | 1/26/2011 00:35:01 | 25.492 |
| 1/29/2011 18:46:01 | 22.085 | 1/26/2011 00:55:01 | 25.429 |
| 1/29/2011 19:06:01 | 21.897 | 1/26/2011 01:15:01 | 25.429 |
| 1/29/2011 19:26:01 | 21.835 | 1/26/2011 01:35:01 | 25.429 |
| 1/29/2011 19:46:01 | 21.772 | 1/26/2011 01:55:01 | 25.429 |
| 1/29/2011 20:06:01 | 21.835 | 1/26/2011 02:15:01 | 25.429 |

|                    |        |                    |        |
|--------------------|--------|--------------------|--------|
| 1/29/2011 20:26:01 | 21.960 | 1/26/2011 02:35:01 | 25.429 |
| 1/29/2011 20:46:01 | 22.022 | 1/26/2011 02:55:01 | 25.367 |
| 1/29/2011 21:06:01 | 22.085 | 1/26/2011 03:15:01 | 25.367 |
| 1/29/2011 21:26:01 | 22.085 | 1/26/2011 03:35:01 | 25.367 |
| 1/29/2011 21:46:01 | 22.147 | 1/26/2011 03:55:01 | 25.367 |
| 1/29/2011 22:06:01 | 22.022 | 1/26/2011 04:15:01 | 25.367 |
| 1/29/2011 22:26:01 | 22.022 | 1/26/2011 04:35:01 | 25.367 |
| 1/29/2011 22:46:01 | 21.960 | 1/26/2011 04:55:01 | 25.304 |
| 1/29/2011 23:06:01 | 21.960 | 1/26/2011 05:15:01 | 25.304 |
| 1/29/2011 23:26:01 | 22.085 | 1/26/2011 05:35:01 | 25.304 |
| 1/29/2011 23:46:01 | 22.085 | 1/26/2011 05:55:01 | 25.242 |
| 1/30/2011 00:06:01 | 22.085 | 1/26/2011 06:15:01 | 25.242 |
| 1/30/2011 00:26:01 | 22.022 | 1/26/2011 06:35:01 | 25.242 |
| 1/30/2011 00:46:01 | 21.960 | 1/26/2011 06:55:01 | 25.242 |
| 1/30/2011 01:06:01 | 21.960 | 1/26/2011 07:15:01 | 25.179 |
| 1/30/2011 01:26:01 | 21.960 | 1/26/2011 07:35:01 | 25.179 |
| 1/30/2011 01:46:01 | 21.960 | 1/26/2011 07:55:01 | 25.179 |
| 1/30/2011 02:06:01 | 21.960 | 1/26/2011 08:15:01 | 25.179 |
| 1/30/2011 02:26:01 | 21.960 | 1/26/2011 08:35:01 | 25.179 |
| 1/30/2011 02:46:01 | 22.022 | 1/26/2011 08:55:01 | 25.179 |
| 1/30/2011 03:06:01 | 22.085 | 1/26/2011 09:15:01 | 25.117 |
| 1/30/2011 03:26:01 | 22.147 | 1/26/2011 09:35:01 | 25.117 |
| 1/30/2011 03:46:01 | 22.147 | 1/26/2011 09:55:01 | 25.117 |
| 1/30/2011 04:06:01 | 22.210 | 1/26/2011 10:15:01 | 25.117 |
| 1/30/2011 04:26:01 | 22.273 | 1/26/2011 10:35:01 | 25.117 |
| 1/30/2011 04:46:01 | 22.335 | 1/26/2011 10:55:01 | 25.117 |
| 1/30/2011 05:06:01 | 22.523 | 1/26/2011 11:15:01 | 25.117 |
| 1/30/2011 05:26:01 | 22.710 | 1/26/2011 11:35:01 | 25.117 |
| 1/30/2011 05:46:01 | 22.835 | 1/26/2011 11:55:01 | 25.117 |
| 1/30/2011 06:06:01 | 22.960 | 1/26/2011 12:15:01 | 25.117 |
| 1/30/2011 06:26:01 | 23.023 | 1/26/2011 12:35:01 | 25.117 |
| 1/30/2011 06:46:01 | 23.086 | 1/26/2011 12:55:01 | 25.117 |
| 1/30/2011 07:06:01 | 23.148 | 1/26/2011 13:15:01 | 25.117 |
| 1/30/2011 07:26:01 | 23.211 | 1/26/2011 13:35:01 | 25.117 |
| 1/30/2011 07:46:01 | 23.273 | 1/26/2011 13:55:01 | 25.117 |
| 1/30/2011 08:06:01 | 23.336 | 1/26/2011 14:15:01 | 25.117 |
| 1/30/2011 08:26:01 | 23.273 | 1/26/2011 14:35:01 | 25.117 |
| 1/30/2011 08:46:01 | 22.585 | 1/26/2011 14:55:01 | 25.117 |
| 1/30/2011 09:06:01 | 22.273 | 1/26/2011 15:15:01 | 25.117 |
| 1/30/2011 09:26:01 | 22.085 | 1/26/2011 15:35:01 | 25.117 |
| 1/30/2011 09:46:01 | 22.210 | 1/26/2011 15:55:01 | 25.179 |
| 1/30/2011 10:06:01 | 22.335 | 1/26/2011 16:15:01 | 25.179 |
| 1/30/2011 10:26:01 | 22.460 | 1/26/2011 16:35:01 | 25.179 |
| 1/30/2011 10:46:01 | 22.585 | 1/26/2011 16:55:01 | 25.179 |
| 1/30/2011 11:06:01 | 22.773 | 1/26/2011 17:15:01 | 25.179 |
| 1/30/2011 11:26:01 | 22.898 | 1/26/2011 17:35:01 | 25.179 |
| 1/30/2011 11:46:01 | 22.960 | 1/26/2011 17:55:01 | 25.179 |
| 1/30/2011 12:06:01 | 23.023 | 1/26/2011 18:15:01 | 25.179 |
| 1/30/2011 12:26:01 | 23.023 | 1/26/2011 18:35:01 | 25.179 |
| 1/30/2011 12:46:01 | 23.148 | 1/26/2011 18:55:01 | 25.179 |

|                    |        |                    |        |
|--------------------|--------|--------------------|--------|
| 1/30/2011 13:06:01 | 23.336 | 1/26/2011 19:15:01 | 25.179 |
| 1/30/2011 13:26:01 | 23.336 | 1/26/2011 19:35:01 | 25.179 |
| 1/30/2011 13:46:01 | 23.461 | 1/26/2011 19:55:01 | 25.179 |
| 1/30/2011 14:06:01 | 23.523 | 1/26/2011 20:15:01 | 25.179 |
| 1/30/2011 14:26:01 | 23.836 | 1/26/2011 20:35:01 | 25.179 |
| 1/30/2011 14:46:01 | 23.961 | 1/26/2011 20:55:01 | 25.179 |
| 1/30/2011 15:06:01 | 24.086 | 1/26/2011 21:15:01 | 25.179 |
| 1/30/2011 15:26:01 | 24.273 | 1/26/2011 21:35:01 | 25.179 |
| 1/30/2011 15:46:01 | 24.461 | 1/26/2011 21:55:01 | 25.179 |
| 1/30/2011 16:06:01 | 24.523 | 1/26/2011 22:15:01 | 25.179 |
| 1/30/2011 16:26:01 | 24.711 | 1/26/2011 22:35:01 | 25.179 |
| 1/30/2011 16:46:01 | 24.961 | 1/26/2011 22:55:01 | 25.117 |
| 1/30/2011 17:06:01 | 25.086 | 1/26/2011 23:15:01 | 25.117 |
| 1/30/2011 17:26:01 | 24.961 | 1/26/2011 23:35:01 | 25.117 |
| 1/30/2011 17:46:01 | 24.774 | 1/26/2011 23:55:01 | 25.117 |
| 1/30/2011 18:06:01 | 24.586 | 1/27/2011 00:15:01 | 25.117 |
| 1/30/2011 18:26:01 | 24.398 | 1/27/2011 00:35:01 | 25.117 |
| 1/30/2011 18:46:01 | 24.336 | 1/27/2011 00:55:01 | 25.117 |
| 1/30/2011 19:06:01 | 24.273 | 1/27/2011 01:15:01 | 25.117 |
| 1/30/2011 19:26:01 | 24.273 | 1/27/2011 01:35:01 | 25.117 |
| 1/30/2011 19:46:01 | 24.148 | 1/27/2011 01:55:01 | 25.117 |
| 1/30/2011 20:06:01 | 24.023 | 1/27/2011 02:15:01 | 25.117 |
| 1/30/2011 20:26:01 | 23.961 | 1/27/2011 02:35:01 | 25.117 |
| 1/30/2011 20:46:01 | 23.898 | 1/27/2011 02:55:01 | 25.054 |
| 1/30/2011 21:06:01 | 23.898 | 1/27/2011 03:15:01 | 25.054 |
| 1/30/2011 21:26:01 | 23.836 | 1/27/2011 03:35:01 | 25.054 |
| 1/30/2011 21:46:01 | 23.836 | 1/27/2011 03:55:01 | 25.054 |
| 1/30/2011 22:06:01 | 23.773 | 1/27/2011 04:15:01 | 25.054 |
| 1/30/2011 22:26:01 | 23.773 | 1/27/2011 04:35:01 | 25.054 |
| 1/30/2011 22:46:01 | 23.961 | 1/27/2011 04:55:01 | 25.054 |
| 1/30/2011 23:06:01 | 24.148 | 1/27/2011 05:15:01 | 25.054 |
| 1/30/2011 23:26:01 | 24.273 | 1/27/2011 05:35:01 | 25.054 |
| 1/30/2011 23:46:01 | 24.398 | 1/27/2011 05:55:01 | 24.992 |
| 1/31/2011 00:06:01 | 24.398 | 1/27/2011 06:15:01 | 24.992 |
| 1/31/2011 00:26:01 | 24.461 | 1/27/2011 06:35:01 | 24.992 |
| 1/31/2011 00:46:01 | 24.398 | 1/27/2011 06:55:01 | 24.992 |
| 1/31/2011 01:06:01 | 24.398 | 1/27/2011 07:15:01 | 24.992 |
| 1/31/2011 01:26:01 | 24.461 | 1/27/2011 07:35:01 | 24.992 |
| 1/31/2011 01:46:01 | 24.523 | 1/27/2011 07:55:01 | 24.992 |
| 1/31/2011 02:06:01 | 24.523 | 1/27/2011 08:15:01 | 24.929 |
| 1/31/2011 02:26:01 | 24.461 | 1/27/2011 08:35:01 | 24.929 |
| 1/31/2011 02:46:01 | 24.336 | 1/27/2011 08:55:01 | 24.929 |
| 1/31/2011 03:06:01 | 24.398 | 1/27/2011 09:15:01 | 24.929 |
| 1/31/2011 03:26:01 | 24.398 | 1/27/2011 09:35:01 | 24.929 |
| 1/31/2011 03:46:01 | 24.398 | 1/27/2011 09:55:01 | 24.929 |
| 1/31/2011 04:06:01 | 24.273 | 1/27/2011 10:15:01 | 24.867 |
| 1/31/2011 04:26:01 | 23.961 | 1/27/2011 10:35:01 | 24.867 |
| 1/31/2011 04:46:01 | 23.773 | 1/27/2011 10:55:01 | 24.867 |
| 1/31/2011 05:06:01 | 23.711 | 1/27/2011 11:15:01 | 24.804 |
| 1/31/2011 05:26:01 | 23.648 | 1/27/2011 11:35:01 | 24.804 |



|                    |        |                    |        |
|--------------------|--------|--------------------|--------|
| 1/31/2011 05:46:01 | 23.523 | 1/27/2011 11:55:01 | 24.804 |
| 1/31/2011 06:06:01 | 23.461 | 1/27/2011 12:15:01 | 24.804 |
| 1/31/2011 06:26:01 | 23.461 | 1/27/2011 12:35:01 | 24.742 |
| 1/31/2011 06:46:01 | 23.836 | 1/27/2011 12:55:01 | 24.742 |
| 1/31/2011 07:06:01 | 24.086 | 1/27/2011 13:15:01 | 24.742 |
| 1/31/2011 07:26:01 | 24.523 | 1/27/2011 13:35:01 | 24.742 |
| 1/31/2011 07:46:01 | 24.648 | 1/27/2011 13:55:01 | 24.679 |
| 1/31/2011 08:06:01 | 25.024 | 1/27/2011 14:15:01 | 24.679 |
| 1/31/2011 08:26:01 | 25.211 | 1/27/2011 14:35:01 | 24.679 |
| 1/31/2011 08:46:01 | 25.461 | 1/27/2011 14:55:01 | 24.679 |
| 1/31/2011 09:06:01 | 26.086 | 1/27/2011 15:15:01 | 24.679 |
| 1/31/2011 09:26:01 | 26.148 | 1/27/2011 15:35:01 | 24.679 |
| 1/31/2011 09:46:01 | 26.648 | 1/27/2011 15:55:01 | 24.679 |
| 1/31/2011 10:06:01 | 26.961 | 1/27/2011 16:15:01 | 24.679 |
| 1/31/2011 10:26:01 | 27.336 | 1/27/2011 16:35:01 | 24.617 |
| 1/31/2011 10:46:01 | 27.336 | 1/27/2011 16:55:01 | 24.617 |
| 1/31/2011 11:06:01 | 26.773 | 1/27/2011 17:15:01 | 24.617 |
| 1/31/2011 11:26:01 | 25.836 | 1/27/2011 17:35:01 | 24.617 |
| 1/31/2011 11:46:01 | 25.836 | 1/27/2011 17:55:01 | 24.617 |
| 1/31/2011 12:06:01 | 25.711 | 1/27/2011 18:15:01 | 24.617 |
| 1/31/2011 12:26:01 | 25.899 | 1/27/2011 18:35:01 | 24.679 |
| 1/31/2011 12:46:01 | 25.461 | 1/27/2011 18:55:01 | 24.679 |
| 1/31/2011 13:06:01 | 25.024 | 1/27/2011 19:15:01 | 24.492 |
| 1/31/2011 13:26:01 | 24.899 | 1/27/2011 19:35:01 | 24.429 |
| 1/31/2011 13:46:01 | 24.961 | 1/27/2011 19:55:01 | 24.429 |
| 1/31/2011 14:06:01 | 25.149 | 1/27/2011 20:15:01 | 24.429 |
| 1/31/2011 14:26:01 | 25.461 | 1/27/2011 20:35:01 | 24.429 |
| 1/31/2011 14:46:01 | 26.024 | 1/27/2011 20:55:01 | 24.429 |
| 1/31/2011 15:06:01 | 26.461 | 1/27/2011 21:15:01 | 24.367 |
| 1/31/2011 15:26:01 | 26.898 | 1/27/2011 21:35:01 | 24.367 |
| 1/31/2011 15:46:01 | 27.086 | 1/27/2011 21:55:01 | 24.304 |
| 1/31/2011 16:06:01 | 27.273 | 1/27/2011 22:15:01 | 24.304 |
| 1/31/2011 16:26:01 | 27.211 | 1/27/2011 22:35:01 | 24.304 |
| 1/31/2011 16:46:01 | 26.898 | 1/27/2011 22:55:01 | 24.242 |
| 1/31/2011 17:06:01 | 26.773 | 1/27/2011 23:15:01 | 24.242 |
| 1/31/2011 17:26:01 | 26.086 | 1/27/2011 23:35:01 | 24.242 |
| 1/31/2011 17:46:01 | 25.461 | 1/27/2011 23:55:01 | 24.242 |
| 1/31/2011 18:06:01 | 25.336 | 1/28/2011 00:15:01 | 24.242 |
| 1/31/2011 18:26:01 | 25.086 | 1/28/2011 00:35:01 | 24.242 |
| 1/31/2011 18:46:01 | 24.899 | 1/28/2011 00:55:01 | 24.179 |
| 1/31/2011 19:06:01 | 24.648 | 1/28/2011 01:15:01 | 24.179 |
| 1/31/2011 19:26:01 | 24.336 | 1/28/2011 01:35:01 | 24.179 |
| 1/31/2011 19:46:01 | 24.086 | 1/28/2011 01:55:01 | 24.179 |
| 1/31/2011 20:06:01 | 23.836 | 1/28/2011 02:15:01 | 24.179 |
| 1/31/2011 20:26:01 | 23.586 | 1/28/2011 02:35:01 | 24.179 |
| 1/31/2011 20:46:01 | 23.398 | 1/28/2011 02:55:01 | 24.179 |
| 1/31/2011 21:06:01 | 23.461 | 1/28/2011 03:15:01 | 24.117 |
| 1/31/2011 21:26:01 | 23.398 | 1/28/2011 03:35:01 | 24.117 |
| 1/31/2011 21:46:01 | 23.336 | 1/28/2011 03:55:01 | 24.117 |
| 1/31/2011 22:06:01 | 23.148 | 1/28/2011 04:15:01 | 24.117 |

|                    |        |                    |        |
|--------------------|--------|--------------------|--------|
| 1/31/2011 22:26:01 | 23.023 | 1/28/2011 04:35:01 | 24.117 |
| 1/31/2011 22:46:01 | 22.898 | 1/28/2011 04:55:01 | 24.117 |
| 1/31/2011 23:06:01 | 22.773 | 1/28/2011 05:15:01 | 24.117 |
| 1/31/2011 23:26:01 | 22.710 | 1/28/2011 05:35:01 | 24.117 |
| 1/31/2011 23:46:01 | 23.023 | 1/28/2011 05:55:01 | 24.117 |
| 2/1/2011 00:06:01  | 23.148 | 1/28/2011 06:15:01 | 24.117 |
| 2/1/2011 00:26:01  | 23.273 | 1/28/2011 06:35:01 | 24.117 |
| 2/1/2011 00:46:01  | 23.336 | 1/28/2011 06:55:01 | 24.117 |
| 2/1/2011 01:06:01  | 23.398 | 1/28/2011 07:15:01 | 24.054 |
| 2/1/2011 01:26:01  | 23.648 | 1/28/2011 07:35:01 | 24.054 |
| 2/1/2011 01:46:01  | 23.711 | 1/28/2011 07:55:01 | 24.054 |
| 2/1/2011 02:06:01  | 23.648 | 1/28/2011 08:15:01 | 24.054 |
| 2/1/2011 02:26:01  | 23.648 | 1/28/2011 08:35:01 | 24.054 |
| 2/1/2011 02:46:01  | 23.586 | 1/28/2011 08:55:01 | 24.054 |
| 2/1/2011 03:06:01  | 23.711 | 1/28/2011 09:15:01 | 24.054 |
| 2/1/2011 03:26:01  | 23.773 | 1/28/2011 09:35:01 | 24.054 |
| 2/1/2011 03:46:01  | 23.898 | 1/28/2011 09:55:01 | 24.054 |
| 2/1/2011 04:06:01  | 24.086 | 1/28/2011 10:15:01 | 24.054 |
| 2/1/2011 04:26:01  | 24.086 | 1/28/2011 10:35:01 | 24.054 |
| 2/1/2011 04:46:01  | 24.086 | 1/28/2011 10:55:01 | 24.117 |
| 2/1/2011 05:06:01  | 24.023 | 1/28/2011 11:15:01 | 24.117 |
| 2/1/2011 05:26:01  | 23.836 | 1/28/2011 11:35:01 | 24.117 |
| 2/1/2011 05:46:01  | 23.648 | 1/28/2011 11:55:01 | 24.117 |
| 2/1/2011 06:06:01  | 23.586 | 1/28/2011 12:15:01 | 24.117 |
| 2/1/2011 06:26:01  | 23.773 | 1/28/2011 12:35:01 | 24.179 |
| 2/1/2011 06:46:01  | 24.148 | 1/28/2011 12:55:01 | 24.179 |
| 2/1/2011 07:06:01  | 24.586 | 1/28/2011 13:15:01 | 24.179 |
| 2/1/2011 07:26:01  | 24.899 | 1/28/2011 13:35:01 | 24.179 |
| 2/1/2011 07:46:01  | 25.149 | 1/28/2011 13:55:01 | 24.242 |
| 2/1/2011 08:06:01  | 25.461 | 1/28/2011 14:15:01 | 24.242 |
| 2/1/2011 08:26:01  | 25.961 | 1/28/2011 14:35:01 | 24.242 |
| 2/1/2011 08:46:01  | 26.336 | 1/28/2011 14:55:01 | 24.304 |
| 2/1/2011 09:06:01  | 27.086 | 1/28/2011 15:15:01 | 24.304 |
| 2/1/2011 09:26:01  | 26.773 | 1/28/2011 15:35:01 | 24.304 |
| 2/1/2011 09:46:01  | 26.648 | 1/28/2011 15:55:01 | 24.367 |
| 2/1/2011 10:06:01  | 27.898 | 1/28/2011 16:15:01 | 24.367 |
| 2/1/2011 10:26:01  | 29.085 | 1/28/2011 16:35:01 | 24.367 |
| 2/1/2011 10:46:01  | 28.210 | 1/28/2011 16:55:01 | 24.367 |
| 2/1/2011 11:06:01  | 29.334 | 1/28/2011 17:15:01 | 24.429 |
| 2/1/2011 11:26:01  | 29.459 | 1/28/2011 17:35:01 | 24.429 |
| 2/1/2011 11:46:01  | 29.397 | 1/28/2011 17:55:01 | 24.429 |
| 2/1/2011 12:06:01  | 29.522 | 1/28/2011 18:15:01 | 24.429 |
| 2/1/2011 12:26:01  | 29.334 | 1/28/2011 18:35:01 | 24.429 |
| 2/1/2011 12:46:01  | 28.835 | 1/28/2011 18:55:01 | 24.492 |
| 2/1/2011 13:06:01  | 29.210 | 1/28/2011 19:15:01 | 24.492 |
| 2/1/2011 13:26:01  | 29.896 | 1/28/2011 19:35:01 | 24.492 |
| 2/1/2011 13:46:01  | 29.334 | 1/28/2011 19:55:01 | 24.492 |
| 2/1/2011 14:06:01  | 27.835 | 1/28/2011 20:15:01 | 24.492 |
| 2/1/2011 14:26:01  | 28.897 | 1/28/2011 20:35:01 | 24.492 |
| 2/1/2011 14:46:01  | 30.334 | 1/28/2011 20:55:01 | 24.492 |

|                   |        |                    |        |
|-------------------|--------|--------------------|--------|
| 2/1/2011 15:06:01 | 30.583 | 1/28/2011 21:15:01 | 24.492 |
| 2/1/2011 15:26:01 | 30.771 | 1/28/2011 21:35:01 | 24.492 |
| 2/1/2011 15:46:01 | 29.834 | 1/28/2011 21:55:01 | 24.492 |
| 2/1/2011 16:06:01 | 29.022 | 1/28/2011 22:15:01 | 24.492 |
| 2/1/2011 16:26:01 | 28.835 | 1/28/2011 22:35:01 | 24.492 |
| 2/1/2011 16:46:01 | 28.647 | 1/28/2011 22:55:01 | 24.492 |
| 2/1/2011 17:06:01 | 28.398 | 1/28/2011 23:15:01 | 24.492 |
| 2/1/2011 17:26:01 | 28.460 | 1/28/2011 23:35:01 | 24.492 |
| 2/1/2011 17:46:01 | 27.898 | 1/28/2011 23:55:01 | 24.492 |
| 2/1/2011 18:06:01 | 26.836 | 1/29/2011 00:15:01 | 24.492 |
| 2/1/2011 18:26:01 | 26.336 | 1/29/2011 00:35:01 | 24.492 |
| 2/1/2011 18:46:01 | 26.024 | 1/29/2011 00:55:01 | 24.492 |
| 2/1/2011 19:06:01 | 25.711 | 1/29/2011 01:15:01 | 24.492 |
| 2/1/2011 19:26:01 | 25.399 | 1/29/2011 01:35:01 | 24.492 |
| 2/1/2011 19:46:01 | 25.211 | 1/29/2011 01:55:01 | 24.492 |
| 2/1/2011 20:06:01 | 25.086 | 1/29/2011 02:15:01 | 24.492 |
| 2/1/2011 20:26:01 | 24.899 | 1/29/2011 02:35:01 | 24.492 |
| 2/1/2011 20:46:01 | 24.774 | 1/29/2011 02:55:01 | 24.492 |
| 2/1/2011 21:06:01 | 24.586 | 1/29/2011 03:15:01 | 24.492 |
| 2/1/2011 21:26:01 | 24.586 | 1/29/2011 03:35:01 | 24.492 |
| 2/1/2011 21:46:01 | 24.648 | 1/29/2011 03:55:01 | 24.492 |
| 2/1/2011 22:06:01 | 24.648 | 1/29/2011 04:15:01 | 24.492 |
| 2/1/2011 22:26:01 | 24.586 | 1/29/2011 04:35:01 | 24.429 |
| 2/1/2011 22:46:01 | 24.336 | 1/29/2011 04:55:01 | 24.429 |
| 2/1/2011 23:06:01 | 24.336 | 1/29/2011 05:15:01 | 24.429 |
| 2/1/2011 23:26:01 | 24.273 | 1/29/2011 05:35:01 | 24.429 |
| 2/1/2011 23:46:01 | 24.148 | 1/29/2011 05:55:01 | 24.429 |
| 2/2/2011 00:06:01 | 24.086 | 1/29/2011 06:15:01 | 24.429 |
| 2/2/2011 00:26:01 | 24.086 | 1/29/2011 06:35:01 | 24.367 |
| 2/2/2011 00:46:01 | 24.273 | 1/29/2011 06:55:01 | 24.367 |
| 2/2/2011 01:06:01 | 24.273 | 1/29/2011 07:15:01 | 24.367 |
| 2/2/2011 01:26:01 | 24.086 | 1/29/2011 07:35:01 | 24.367 |
| 2/2/2011 01:46:01 | 23.961 | 1/29/2011 07:55:01 | 24.367 |
| 2/2/2011 02:06:01 | 23.836 | 1/29/2011 08:15:01 | 24.304 |
| 2/2/2011 02:26:01 | 23.773 | 1/29/2011 08:35:01 | 24.304 |
| 2/2/2011 02:46:01 | 23.711 | 1/29/2011 08:55:01 | 24.304 |
| 2/2/2011 03:06:01 | 23.586 | 1/29/2011 09:15:01 | 24.304 |
| 2/2/2011 03:26:01 | 23.523 | 1/29/2011 09:35:01 | 24.304 |
| 2/2/2011 03:46:01 | 23.586 | 1/29/2011 09:55:01 | 24.242 |
| 2/2/2011 04:06:01 | 23.648 | 1/29/2011 10:15:01 | 24.242 |
| 2/2/2011 04:26:01 | 23.586 | 1/29/2011 10:35:01 | 24.242 |
| 2/2/2011 04:46:01 | 23.461 | 1/29/2011 10:55:01 | 24.242 |
| 2/2/2011 05:06:01 | 23.211 | 1/29/2011 11:15:01 | 24.242 |
| 2/2/2011 05:26:01 | 23.086 | 1/29/2011 11:35:01 | 24.242 |
| 2/2/2011 05:46:01 | 23.086 | 1/29/2011 11:55:01 | 24.242 |
| 2/2/2011 06:06:01 | 23.148 | 1/29/2011 12:15:01 | 24.242 |
| 2/2/2011 06:26:01 | 23.523 | 1/29/2011 12:35:01 | 24.242 |
| 2/2/2011 06:46:01 | 23.898 | 1/29/2011 12:55:01 | 24.304 |
| 2/2/2011 07:06:01 | 24.211 | 1/29/2011 13:15:01 | 24.304 |
| 2/2/2011 07:26:01 | 24.774 | 1/29/2011 13:35:01 | 24.304 |

|                   |        |                    |        |
|-------------------|--------|--------------------|--------|
| 2/2/2011 07:46:01 | 25.211 | 1/29/2011 13:55:01 | 24.304 |
| 2/2/2011 08:06:01 | 25.586 | 1/29/2011 14:15:01 | 24.367 |
| 2/2/2011 08:26:01 | 25.836 | 1/29/2011 14:35:01 | 24.367 |
| 2/2/2011 08:46:01 | 26.273 | 1/29/2011 14:55:01 | 24.367 |
| 2/2/2011 09:06:01 | 26.773 | 1/29/2011 15:15:01 | 24.367 |
| 2/2/2011 09:26:01 | 27.710 | 1/29/2011 15:35:01 | 24.429 |
| 2/2/2011 09:46:01 | 28.897 | 1/29/2011 15:55:01 | 24.429 |
| 2/2/2011 10:06:01 | 29.896 | 1/29/2011 16:15:01 | 24.429 |
| 2/2/2011 10:26:01 | 30.833 | 1/29/2011 16:35:01 | 24.429 |
| 2/2/2011 10:46:01 | 31.332 | 1/29/2011 16:55:01 | 24.492 |
| 2/2/2011 11:06:01 | 31.332 | 1/29/2011 17:15:01 | 24.492 |
| 2/2/2011 11:26:01 | 31.894 | 1/29/2011 17:35:01 | 24.492 |
| 2/2/2011 11:46:01 | 32.394 | 1/29/2011 17:55:01 | 24.492 |
| 2/2/2011 12:06:01 | 32.456 | 1/29/2011 18:15:01 | 24.492 |
| 2/2/2011 12:26:01 | 32.144 | 1/29/2011 18:35:01 | 24.492 |
| 2/2/2011 12:46:01 | 31.520 | 1/29/2011 18:55:01 | 24.492 |
| 2/2/2011 13:06:01 | 31.582 | 1/29/2011 19:15:01 | 24.492 |
| 2/2/2011 13:26:01 | 29.210 | 1/29/2011 19:35:01 | 24.429 |
| 2/2/2011 13:46:01 | 28.210 | 1/29/2011 19:55:01 | 24.429 |
| 2/2/2011 14:06:01 | 27.648 | 1/29/2011 20:15:01 | 24.429 |
| 2/2/2011 14:26:01 | 27.523 | 1/29/2011 20:35:01 | 24.429 |
| 2/2/2011 14:46:01 | 27.586 | 1/29/2011 20:55:01 | 24.429 |
| 2/2/2011 15:06:01 | 27.398 | 1/29/2011 21:15:01 | 24.429 |
| 2/2/2011 15:26:01 | 27.398 | 1/29/2011 21:35:01 | 24.429 |
| 2/2/2011 15:46:01 | 27.586 | 1/29/2011 21:55:01 | 24.367 |
| 2/2/2011 16:06:01 | 27.773 | 1/29/2011 22:15:01 | 24.367 |
| 2/2/2011 16:26:01 | 27.835 | 1/29/2011 22:35:01 | 24.367 |
| 2/2/2011 16:46:01 | 27.835 | 1/29/2011 22:55:01 | 24.304 |
| 2/2/2011 17:06:01 | 27.710 | 1/29/2011 23:15:01 | 24.304 |
| 2/2/2011 17:26:01 | 27.523 | 1/29/2011 23:35:01 | 24.242 |
| 2/2/2011 17:46:01 | 27.273 | 1/29/2011 23:55:01 | 24.242 |
| 2/2/2011 18:06:01 | 27.023 | 1/30/2011 00:15:01 | 24.179 |
| 2/2/2011 18:26:01 | 26.773 | 1/30/2011 00:35:01 | 24.179 |
| 2/2/2011 18:46:01 | 26.586 | 1/30/2011 00:55:01 | 24.179 |
| 2/2/2011 19:06:01 | 26.398 | 1/30/2011 01:15:01 | 24.117 |
| 2/2/2011 19:26:01 | 26.211 | 1/30/2011 01:35:01 | 24.117 |
| 2/2/2011 19:46:01 | 25.961 | 1/30/2011 01:55:01 | 24.054 |
| 2/2/2011 20:06:01 | 25.649 | 1/30/2011 02:15:01 | 24.054 |
| 2/2/2011 20:26:01 | 25.336 | 1/30/2011 02:35:01 | 23.992 |
| 2/2/2011 20:46:01 | 25.086 | 1/30/2011 02:55:01 | 23.992 |
| 2/2/2011 21:06:01 | 24.961 | 1/30/2011 03:15:01 | 23.929 |
| 2/2/2011 21:26:01 | 24.836 | 1/30/2011 03:35:01 | 23.929 |
| 2/2/2011 21:46:01 | 24.774 | 1/30/2011 03:55:01 | 23.929 |
| 2/2/2011 22:06:01 | 24.774 | 1/30/2011 04:15:01 | 23.867 |
| 2/2/2011 22:26:01 | 24.774 | 1/30/2011 04:35:01 | 23.867 |
| 2/2/2011 22:46:01 | 24.711 | 1/30/2011 04:55:01 | 23.867 |
| 2/2/2011 23:06:01 | 24.836 | 1/30/2011 05:15:01 | 23.867 |
| 2/2/2011 23:26:01 | 24.899 | 1/30/2011 05:35:01 | 23.867 |
| 2/2/2011 23:46:01 | 24.961 | 1/30/2011 05:55:01 | 23.804 |
| 2/3/2011 00:06:01 | 24.961 | 1/30/2011 06:15:01 | 23.804 |

|                   |        |                    |        |
|-------------------|--------|--------------------|--------|
| 2/3/2011 00:26:01 | 24.961 | 1/30/2011 06:35:01 | 23.804 |
| 2/3/2011 00:46:01 | 25.024 | 1/30/2011 06:55:01 | 23.804 |
| 2/3/2011 01:06:01 | 24.899 | 1/30/2011 07:15:01 | 23.804 |
| 2/3/2011 01:26:01 | 24.648 | 1/30/2011 07:35:01 | 23.804 |
| 2/3/2011 01:46:01 | 24.523 | 1/30/2011 07:55:01 | 23.742 |
| 2/3/2011 02:06:01 | 24.523 | 1/30/2011 08:15:01 | 23.742 |
| 2/3/2011 02:26:01 | 24.398 | 1/30/2011 08:35:01 | 23.742 |
| 2/3/2011 02:46:01 | 24.273 | 1/30/2011 08:55:01 | 23.742 |
| 2/3/2011 03:06:01 | 24.148 | 1/30/2011 09:15:01 | 23.742 |
| 2/3/2011 03:26:01 | 24.023 | 1/30/2011 09:35:01 | 23.742 |
| 2/3/2011 03:46:01 | 24.023 | 1/30/2011 09:55:01 | 23.742 |
| 2/3/2011 04:06:01 | 23.898 | 1/30/2011 10:15:01 | 23.742 |
| 2/3/2011 04:26:01 | 23.773 | 1/30/2011 10:35:01 | 23.679 |
| 2/3/2011 04:46:01 | 23.711 | 1/30/2011 10:55:01 | 23.679 |
| 2/3/2011 05:06:01 | 23.711 | 1/30/2011 11:15:01 | 23.679 |
| 2/3/2011 05:26:01 | 23.898 | 1/30/2011 11:35:01 | 23.679 |
| 2/3/2011 05:46:01 | 24.023 | 1/30/2011 11:55:01 | 23.679 |
| 2/3/2011 06:06:01 | 24.023 | 1/30/2011 12:15:01 | 23.679 |
| 2/3/2011 06:26:01 | 24.211 | 1/30/2011 12:35:01 | 23.679 |
| 2/3/2011 06:46:01 | 24.836 | 1/30/2011 12:55:01 | 23.679 |
| 2/3/2011 07:06:01 | 25.274 | 1/30/2011 13:15:01 | 23.679 |
| 2/3/2011 07:26:01 | 25.461 | 1/30/2011 13:35:01 | 23.679 |
| 2/3/2011 07:46:01 | 25.961 | 1/30/2011 13:55:01 | 23.679 |
| 2/3/2011 08:06:01 | 26.148 | 1/30/2011 14:15:01 | 23.679 |
| 2/3/2011 08:26:01 | 26.773 | 1/30/2011 14:35:01 | 23.679 |
| 2/3/2011 08:46:01 | 27.023 | 1/30/2011 14:55:01 | 23.679 |
| 2/3/2011 09:06:01 | 27.710 | 1/30/2011 15:15:01 | 23.679 |
| 2/3/2011 09:26:01 | 28.148 | 1/30/2011 15:35:01 | 23.679 |
| 2/3/2011 09:46:01 | 28.523 | 1/30/2011 15:55:01 | 23.679 |
| 2/3/2011 10:06:01 | 28.148 | 1/30/2011 16:15:01 | 23.679 |
| 2/3/2011 10:26:01 | 28.523 | 1/30/2011 16:35:01 | 23.679 |
| 2/3/2011 10:46:01 | 28.710 | 1/30/2011 16:55:01 | 23.679 |
| 2/3/2011 11:06:01 | 27.898 | 1/30/2011 17:15:01 | 23.679 |
| 2/3/2011 11:26:01 | 25.649 | 1/30/2011 17:35:01 | 23.679 |
| 2/3/2011 11:46:01 | 25.149 | 1/30/2011 17:55:01 | 23.742 |
| 2/3/2011 12:06:01 | 24.836 | 1/30/2011 18:15:01 | 23.742 |
| 2/3/2011 12:26:01 | 24.961 | 1/30/2011 18:35:01 | 23.742 |
| 2/3/2011 12:46:01 | 26.024 | 1/30/2011 18:55:01 | 23.742 |
| 2/3/2011 13:06:01 | 26.773 | 1/30/2011 19:15:01 | 23.742 |
| 2/3/2011 13:26:01 | 28.273 | 1/30/2011 19:35:01 | 23.742 |
| 2/3/2011 13:46:01 | 29.772 | 1/30/2011 19:55:01 | 23.742 |
| 2/3/2011 14:06:01 | 30.209 | 1/30/2011 20:15:01 | 23.742 |
| 2/3/2011 14:26:01 | 29.459 | 1/30/2011 20:35:01 | 23.742 |
| 2/3/2011 14:46:01 | 30.209 | 1/30/2011 20:55:01 | 23.804 |
| 2/3/2011 15:06:01 | 29.522 | 1/30/2011 21:15:01 | 23.804 |
| 2/3/2011 15:26:01 | 27.211 | 1/30/2011 21:35:01 | 23.804 |
| 2/3/2011 15:46:01 | 26.461 | 1/30/2011 21:55:01 | 23.804 |
| 2/3/2011 16:06:01 | 26.586 | 1/30/2011 22:15:01 | 23.804 |
| 2/3/2011 16:26:01 | 26.711 | 1/30/2011 22:35:01 | 23.804 |
| 2/3/2011 16:46:01 | 26.836 | 1/30/2011 22:55:01 | 23.804 |

|                   |        |                    |        |
|-------------------|--------|--------------------|--------|
| 2/3/2011 17:06:01 | 26.898 | 1/30/2011 23:15:01 | 23.804 |
| 2/3/2011 17:26:01 | 26.961 | 1/30/2011 23:35:01 | 23.867 |
| 2/3/2011 17:46:01 | 26.898 | 1/30/2011 23:55:01 | 23.867 |
| 2/3/2011 18:06:01 | 26.836 | 1/31/2011 00:15:01 | 23.867 |
| 2/3/2011 18:26:01 | 26.586 | 1/31/2011 00:35:01 | 23.867 |
| 2/3/2011 18:46:01 | 26.336 | 1/31/2011 00:55:01 | 23.867 |
| 2/3/2011 19:06:01 | 26.086 | 1/31/2011 01:15:01 | 23.867 |
| 2/3/2011 19:26:01 | 25.961 | 1/31/2011 01:35:01 | 23.867 |
| 2/3/2011 19:46:01 | 25.836 | 1/31/2011 01:55:01 | 23.867 |
| 2/3/2011 20:06:01 | 25.711 | 1/31/2011 02:15:01 | 23.867 |
| 2/3/2011 20:26:01 | 25.586 | 1/31/2011 02:35:01 | 23.867 |
| 2/3/2011 20:46:01 | 25.524 | 1/31/2011 02:55:01 | 23.867 |
| 2/3/2011 21:06:01 | 25.461 | 1/31/2011 03:15:01 | 23.867 |
| 2/3/2011 21:26:01 | 25.274 | 1/31/2011 03:35:01 | 23.929 |
| 2/3/2011 21:46:01 | 25.086 | 1/31/2011 03:55:01 | 23.929 |
| 2/3/2011 22:06:01 | 24.961 | 1/31/2011 04:15:01 | 23.929 |
| 2/3/2011 22:26:01 | 24.899 | 1/31/2011 04:35:01 | 23.929 |
| 2/3/2011 22:46:01 | 24.899 | 1/31/2011 04:55:01 | 23.929 |
| 2/3/2011 23:06:01 | 24.711 | 1/31/2011 05:15:01 | 23.929 |
| 2/3/2011 23:26:01 | 24.711 | 1/31/2011 05:35:01 | 23.929 |
| 2/3/2011 23:46:01 | 24.711 | 1/31/2011 05:55:01 | 23.929 |
| 2/4/2011 00:06:01 | 24.711 | 1/31/2011 06:15:01 | 23.929 |
| 2/4/2011 00:26:01 | 24.836 | 1/31/2011 06:35:01 | 23.992 |
| 2/4/2011 00:46:01 | 24.023 | 1/31/2011 06:55:01 | 23.992 |
| 2/4/2011 01:06:01 | 22.710 | 1/31/2011 07:15:01 | 23.992 |
| 2/4/2011 01:26:01 | 22.335 | 1/31/2011 07:35:01 | 23.992 |
| 2/4/2011 01:46:01 | 22.210 | 1/31/2011 07:55:01 | 23.992 |
| 2/4/2011 02:06:01 | 22.147 | 1/31/2011 08:15:01 | 23.992 |
| 2/4/2011 02:26:01 | 22.210 | 1/31/2011 08:35:01 | 23.992 |
| 2/4/2011 02:46:01 | 22.335 | 1/31/2011 08:55:01 | 23.992 |
| 2/4/2011 03:06:01 | 22.460 | 1/31/2011 09:15:01 | 23.992 |
| 2/4/2011 03:26:01 | 22.523 | 1/31/2011 09:35:01 | 23.992 |
| 2/4/2011 03:46:01 | 22.460 | 1/31/2011 09:55:01 | 23.992 |
| 2/4/2011 04:06:01 | 22.460 | 1/31/2011 10:15:01 | 23.992 |
| 2/4/2011 04:26:01 | 22.523 | 1/31/2011 10:35:01 | 23.992 |
| 2/4/2011 04:46:01 | 22.460 | 1/31/2011 10:55:01 | 23.992 |
| 2/4/2011 05:06:01 | 22.398 | 1/31/2011 11:15:01 | 24.054 |
| 2/4/2011 05:26:01 | 22.335 | 1/31/2011 11:35:01 | 24.054 |
| 2/4/2011 05:46:01 | 22.335 | 1/31/2011 11:55:01 | 24.054 |
| 2/4/2011 06:06:01 | 22.460 | 1/31/2011 12:15:01 | 24.054 |
| 2/4/2011 06:26:01 | 22.648 | 1/31/2011 12:35:01 | 24.117 |
| 2/4/2011 06:46:01 | 22.898 | 1/31/2011 12:55:01 | 24.117 |
| 2/4/2011 07:06:01 | 23.148 | 1/31/2011 13:15:01 | 24.117 |
| 2/4/2011 07:26:01 | 23.461 | 1/31/2011 13:35:01 | 24.179 |
| 2/4/2011 07:46:01 | 23.648 | 1/31/2011 13:55:01 | 24.179 |
| 2/4/2011 08:06:01 | 23.773 | 1/31/2011 14:15:01 | 24.179 |
| 2/4/2011 08:26:01 | 24.273 | 1/31/2011 14:35:01 | 24.179 |
| 2/4/2011 08:46:01 | 24.648 | 1/31/2011 14:55:01 | 24.242 |
| 2/4/2011 09:06:01 | 25.211 | 1/31/2011 15:15:01 | 24.242 |
| 2/4/2011 09:26:01 | 25.711 | 1/31/2011 15:35:01 | 24.242 |

|                   |                           |        |
|-------------------|---------------------------|--------|
| 2/4/2011 09:46:01 | 25.836 1/31/2011 15:55:01 | 24.242 |
| 2/4/2011 10:06:01 | 26.398 1/31/2011 16:15:01 | 24.242 |
| 2/4/2011 10:26:01 | 27.336 1/31/2011 16:35:01 | 24.304 |
| 2/4/2011 10:46:01 | 28.210 1/31/2011 16:55:01 | 24.304 |
| 2/4/2011 11:06:01 | 28.273 1/31/2011 17:15:01 | 24.304 |
| 2/4/2011 11:26:01 | 28.273 1/31/2011 17:35:01 | 24.304 |
| 2/4/2011 11:46:01 | 28.897 1/31/2011 17:55:01 | 24.304 |
| 2/4/2011 12:06:01 | 28.273 1/31/2011 18:15:01 | 24.304 |
| 2/4/2011 12:26:01 | 29.334 1/31/2011 18:35:01 | 24.367 |
| 2/4/2011 12:46:01 | 28.398 1/31/2011 18:55:01 | 24.367 |
| 2/4/2011 13:06:01 | 27.773 1/31/2011 19:15:01 | 24.367 |
| 2/4/2011 13:26:01 | 28.398 1/31/2011 19:35:01 | 24.367 |
| 2/4/2011 13:46:01 | 26.586 1/31/2011 19:55:01 | 24.367 |
| 2/4/2011 14:06:01 | 25.899 1/31/2011 20:15:01 | 24.429 |
| 2/4/2011 14:26:01 | 25.711 1/31/2011 20:35:01 | 24.429 |
| 2/4/2011 14:46:01 | 25.649 1/31/2011 20:55:01 | 24.429 |
| 2/4/2011 15:06:01 | 25.961 1/31/2011 21:15:01 | 24.429 |
| 2/4/2011 15:26:01 | 26.336 1/31/2011 21:35:01 | 24.429 |
| 2/4/2011 15:46:01 | 26.648 1/31/2011 21:55:01 | 24.429 |
| 2/4/2011 16:06:01 | 27.086 1/31/2011 22:15:01 | 24.429 |
| 2/4/2011 16:26:01 | 26.961 1/31/2011 22:35:01 | 24.429 |
| 2/4/2011 16:46:01 | 27.148 1/31/2011 22:55:01 | 24.429 |
| 2/4/2011 17:06:01 | 27.148 1/31/2011 23:15:01 | 24.429 |
| 2/4/2011 17:26:01 | 27.211 1/31/2011 23:35:01 | 24.429 |
| 2/4/2011 17:46:01 | 26.024 1/31/2011 23:55:01 | 24.429 |
| 2/4/2011 18:06:01 | 25.461 2/1/2011 00:15:01  | 24.429 |
| 2/4/2011 18:26:01 | 24.961 2/1/2011 00:35:01  | 24.429 |
| 2/4/2011 18:46:01 | 24.586 2/1/2011 00:55:01  | 24.429 |
| 2/4/2011 19:06:01 | 24.398 2/1/2011 01:15:01  | 24.367 |
| 2/4/2011 19:26:01 | 24.398 2/1/2011 01:35:01  | 24.367 |
| 2/4/2011 19:46:01 | 24.211 2/1/2011 01:55:01  | 24.367 |
| 2/4/2011 20:06:01 | 23.961 2/1/2011 02:15:01  | 24.367 |
| 2/4/2011 20:26:01 | 23.773 2/1/2011 02:35:01  | 24.367 |
| 2/4/2011 20:46:01 | 23.586 2/1/2011 02:55:01  | 24.367 |
| 2/4/2011 21:06:01 | 23.461 2/1/2011 03:15:01  | 24.367 |
| 2/4/2011 21:26:01 | 23.398 2/1/2011 03:35:01  | 24.367 |
| 2/4/2011 21:46:01 | 23.273 2/1/2011 03:55:01  | 24.367 |
| 2/4/2011 22:06:01 | 23.461 2/1/2011 04:15:01  | 24.367 |
| 2/4/2011 22:26:01 | 23.648 2/1/2011 04:35:01  | 24.304 |
| 2/4/2011 22:46:01 | 23.836 2/1/2011 04:55:01  | 24.304 |
| 2/4/2011 23:06:01 | 24.086 2/1/2011 05:15:01  | 24.304 |
| 2/4/2011 23:26:01 | 24.148 2/1/2011 05:35:01  | 24.304 |
| 2/4/2011 23:46:01 | 24.086 2/1/2011 05:55:01  | 24.304 |
| 2/5/2011 00:06:01 | 24.023 2/1/2011 06:15:01  | 24.304 |
| 2/5/2011 00:26:01 | 23.898 2/1/2011 06:35:01  | 24.304 |
| 2/5/2011 00:46:01 | 23.773 2/1/2011 06:55:01  | 24.304 |
| 2/5/2011 01:06:01 | 23.648 2/1/2011 07:15:01  | 24.304 |
| 2/5/2011 01:26:01 | 23.398 2/1/2011 07:35:01  | 24.304 |
| 2/5/2011 01:46:01 | 23.148 2/1/2011 07:55:01  | 24.304 |
| 2/5/2011 02:06:01 | 23.023 2/1/2011 08:15:01  | 24.304 |

|                   |        |                   |        |
|-------------------|--------|-------------------|--------|
| 2/5/2011 02:26:01 | 22.898 | 2/1/2011 08:35:01 | 24.304 |
| 2/5/2011 02:46:01 | 22.835 | 2/1/2011 08:55:01 | 24.304 |
| 2/5/2011 03:06:01 | 22.835 | 2/1/2011 09:15:01 | 24.304 |
| 2/5/2011 03:26:01 | 22.960 | 2/1/2011 09:35:01 | 24.304 |
| 2/5/2011 03:46:01 | 23.023 | 2/1/2011 09:55:01 | 24.304 |
| 2/5/2011 04:06:01 | 23.148 | 2/1/2011 10:15:01 | 24.304 |
| 2/5/2011 04:26:01 | 23.148 | 2/1/2011 10:35:01 | 24.304 |
| 2/5/2011 04:46:01 | 23.086 | 2/1/2011 10:55:01 | 24.304 |
| 2/5/2011 05:06:01 | 23.023 | 2/1/2011 11:15:01 | 24.367 |
| 2/5/2011 05:26:01 | 22.960 | 2/1/2011 11:35:01 | 24.367 |
| 2/5/2011 05:46:01 | 22.898 | 2/1/2011 11:55:01 | 24.367 |
| 2/5/2011 06:06:01 | 22.835 | 2/1/2011 12:15:01 | 24.367 |
| 2/5/2011 06:26:01 | 23.023 | 2/1/2011 12:35:01 | 24.429 |
| 2/5/2011 06:46:01 | 23.398 | 2/1/2011 12:55:01 | 24.429 |
| 2/5/2011 07:06:01 | 23.961 | 2/1/2011 13:15:01 | 24.429 |
| 2/5/2011 07:26:01 | 24.273 | 2/1/2011 13:35:01 | 24.492 |
| 2/5/2011 07:46:01 | 24.523 | 2/1/2011 13:55:01 | 24.492 |
| 2/5/2011 08:06:01 | 25.024 | 2/1/2011 14:15:01 | 24.554 |
| 2/5/2011 08:26:01 | 25.586 | 2/1/2011 14:35:01 | 24.554 |
| 2/5/2011 08:46:01 | 25.836 | 2/1/2011 14:55:01 | 24.554 |
| 2/5/2011 09:06:01 | 26.523 | 2/1/2011 15:15:01 | 24.617 |
| 2/5/2011 09:26:01 | 27.086 | 2/1/2011 15:35:01 | 24.617 |
| 2/5/2011 09:46:01 | 27.710 | 2/1/2011 15:55:01 | 24.617 |
| 2/5/2011 10:06:01 | 28.523 | 2/1/2011 16:15:01 | 24.679 |
| 2/5/2011 10:26:01 | 28.897 | 2/1/2011 16:35:01 | 24.679 |
| 2/5/2011 10:46:01 | 29.397 | 2/1/2011 16:55:01 | 24.742 |
| 2/5/2011 11:06:01 | 29.772 | 2/1/2011 17:15:01 | 24.742 |
| 2/5/2011 11:26:01 | 30.271 | 2/1/2011 17:35:01 | 24.742 |
| 2/5/2011 11:46:01 | 30.458 | 2/1/2011 17:55:01 | 24.804 |
| 2/5/2011 12:06:01 | 31.145 | 2/1/2011 18:15:01 | 24.804 |
| 2/5/2011 12:26:01 | 31.270 | 2/1/2011 18:35:01 | 24.804 |
| 2/5/2011 12:46:01 | 31.894 | 2/1/2011 18:55:01 | 24.867 |
| 2/5/2011 13:06:01 | 32.331 | 2/1/2011 19:15:01 | 24.867 |
| 2/5/2011 13:26:01 | 32.955 | 2/1/2011 19:35:01 | 24.867 |
| 2/5/2011 13:46:01 | 32.331 | 2/1/2011 19:55:01 | 24.867 |
| 2/5/2011 14:06:01 | 32.955 | 2/1/2011 20:15:01 | 24.929 |
| 2/5/2011 14:26:01 | 31.083 | 2/1/2011 20:35:01 | 24.929 |
| 2/5/2011 14:46:01 | 30.583 | 2/1/2011 20:55:01 | 24.929 |
| 2/5/2011 15:06:01 | 31.645 | 2/1/2011 21:15:01 | 24.929 |
| 2/5/2011 15:26:01 | 31.457 | 2/1/2011 21:35:01 | 24.929 |
| 2/5/2011 15:46:01 | 30.334 | 2/1/2011 21:55:01 | 24.992 |
| 2/5/2011 16:06:01 | 28.835 | 2/1/2011 22:15:01 | 24.992 |
| 2/5/2011 16:26:01 | 28.460 | 2/1/2011 22:35:01 | 24.992 |
| 2/5/2011 16:46:01 | 28.460 | 2/1/2011 22:55:01 | 24.992 |
| 2/5/2011 17:06:01 | 28.523 | 2/1/2011 23:15:01 | 24.992 |
| 2/5/2011 17:26:01 | 29.085 | 2/1/2011 23:35:01 | 24.992 |
| 2/5/2011 17:46:01 | 28.210 | 2/1/2011 23:55:01 | 24.992 |
| 2/5/2011 18:06:01 | 27.461 | 2/2/2011 00:15:01 | 24.992 |
| 2/5/2011 18:26:01 | 26.773 | 2/2/2011 00:35:01 | 24.992 |
| 2/5/2011 18:46:01 | 26.148 | 2/2/2011 00:55:01 | 24.992 |



|                   |        |                   |        |
|-------------------|--------|-------------------|--------|
| 2/5/2011 19:06:01 | 25.649 | 2/2/2011 01:15:01 | 24.929 |
| 2/5/2011 19:26:01 | 25.336 | 2/2/2011 01:35:01 | 24.929 |
| 2/5/2011 19:46:01 | 25.649 | 2/2/2011 01:55:01 | 24.929 |
| 2/5/2011 20:06:01 | 25.711 | 2/2/2011 02:15:01 | 24.929 |
| 2/5/2011 20:26:01 | 25.711 | 2/2/2011 02:35:01 | 24.929 |
| 2/5/2011 20:46:01 | 25.586 | 2/2/2011 02:55:01 | 24.929 |
| 2/5/2011 21:06:01 | 25.399 | 2/2/2011 03:15:01 | 24.929 |
| 2/5/2011 21:26:01 | 25.336 | 2/2/2011 03:35:01 | 24.929 |
| 2/5/2011 21:46:01 | 25.149 | 2/2/2011 03:55:01 | 24.929 |
| 2/5/2011 22:06:01 | 25.024 | 2/2/2011 04:15:01 | 24.867 |
| 2/5/2011 22:26:01 | 24.961 | 2/2/2011 04:35:01 | 24.867 |
| 2/5/2011 22:46:01 | 24.961 | 2/2/2011 04:55:01 | 24.867 |
| 2/5/2011 23:06:01 | 24.899 | 2/2/2011 05:15:01 | 24.867 |
| 2/5/2011 23:26:01 | 24.273 | 2/2/2011 05:35:01 | 24.867 |
| 2/5/2011 23:46:01 | 22.835 | 2/2/2011 05:55:01 | 24.867 |
| 2/6/2011 00:06:01 | 22.273 | 2/2/2011 06:15:01 | 24.867 |
| 2/6/2011 00:26:01 | 22.273 | 2/2/2011 06:35:01 | 24.804 |
| 2/6/2011 00:46:01 | 22.273 | 2/2/2011 06:55:01 | 24.804 |
| 2/6/2011 01:06:01 | 22.398 | 2/2/2011 07:15:01 | 24.804 |
| 2/6/2011 01:26:01 | 22.398 | 2/2/2011 07:35:01 | 24.804 |
| 2/6/2011 01:46:01 | 22.460 | 2/2/2011 07:55:01 | 24.804 |
| 2/6/2011 02:06:01 | 22.523 | 2/2/2011 08:15:01 | 24.804 |
| 2/6/2011 02:26:01 | 22.585 | 2/2/2011 08:35:01 | 24.742 |
| 2/6/2011 02:46:01 | 22.585 | 2/2/2011 08:55:01 | 24.742 |
| 2/6/2011 03:06:01 | 22.523 | 2/2/2011 09:15:01 | 24.742 |
| 2/6/2011 03:26:01 | 22.523 | 2/2/2011 09:35:01 | 24.742 |
| 2/6/2011 03:46:01 | 22.523 | 2/2/2011 09:55:01 | 24.742 |
| 2/6/2011 04:06:01 | 22.585 | 2/2/2011 10:15:01 | 24.742 |
| 2/6/2011 04:26:01 | 22.460 | 2/2/2011 10:35:01 | 24.742 |
| 2/6/2011 04:46:01 | 22.460 | 2/2/2011 10:55:01 | 24.742 |
| 2/6/2011 05:06:01 | 22.398 | 2/2/2011 11:15:01 | 24.742 |
| 2/6/2011 05:26:01 | 22.335 | 2/2/2011 11:35:01 | 24.742 |
| 2/6/2011 05:46:01 | 22.273 | 2/2/2011 11:55:01 | 24.742 |
| 2/6/2011 06:06:01 | 22.335 | 2/2/2011 12:15:01 | 24.804 |
| 2/6/2011 06:26:01 | 22.773 | 2/2/2011 12:35:01 | 24.804 |
| 2/6/2011 06:46:01 | 23.211 | 2/2/2011 12:55:01 | 24.867 |
| 2/6/2011 07:06:01 | 23.711 | 2/2/2011 13:15:01 | 24.867 |
| 2/6/2011 07:26:01 | 24.086 | 2/2/2011 13:35:01 | 24.929 |
| 2/6/2011 07:46:01 | 24.774 | 2/2/2011 13:55:01 | 24.929 |
| 2/6/2011 08:06:01 | 25.336 | 2/2/2011 14:15:01 | 24.992 |
| 2/6/2011 08:26:01 | 25.774 | 2/2/2011 14:35:01 | 24.992 |
| 2/6/2011 08:46:01 | 26.086 | 2/2/2011 14:55:01 | 24.992 |
| 2/6/2011 09:06:01 | 26.398 | 2/2/2011 15:15:01 | 25.054 |
| 2/6/2011 09:26:01 | 26.961 | 2/2/2011 15:35:01 | 25.054 |
| 2/6/2011 09:46:01 | 27.648 | 2/2/2011 15:55:01 | 25.117 |
| 2/6/2011 10:06:01 | 28.210 | 2/2/2011 16:15:01 | 25.117 |
| 2/6/2011 10:26:01 | 29.147 | 2/2/2011 16:35:01 | 25.117 |
| 2/6/2011 10:46:01 | 29.085 | 2/2/2011 16:55:01 | 25.179 |
| 2/6/2011 11:06:01 | 30.271 | 2/2/2011 17:15:01 | 25.179 |
| 2/6/2011 11:26:01 | 30.396 | 2/2/2011 17:35:01 | 25.179 |

|                   |        |                   |        |
|-------------------|--------|-------------------|--------|
| 2/6/2011 11:46:01 | 30.895 | 2/2/2011 17:55:01 | 25.179 |
| 2/6/2011 12:06:01 | 31.083 | 2/2/2011 18:15:01 | 25.242 |
| 2/6/2011 12:26:01 | 29.772 | 2/2/2011 18:35:01 | 25.242 |
| 2/6/2011 12:46:01 | 29.459 | 2/2/2011 18:55:01 | 25.242 |
| 2/6/2011 13:06:01 | 29.709 | 2/2/2011 19:15:01 | 25.242 |
| 2/6/2011 13:26:01 | 30.958 | 2/2/2011 19:35:01 | 25.242 |
| 2/6/2011 13:46:01 | 31.270 | 2/2/2011 19:55:01 | 25.242 |
| 2/6/2011 14:06:01 | 31.083 | 2/2/2011 20:15:01 | 25.242 |
| 2/6/2011 14:26:01 | 30.209 | 2/2/2011 20:35:01 | 25.242 |
| 2/6/2011 14:46:01 | 29.210 | 2/2/2011 20:55:01 | 25.242 |
| 2/6/2011 15:06:01 | 31.083 | 2/2/2011 21:15:01 | 25.304 |
| 2/6/2011 15:26:01 | 31.270 | 2/2/2011 21:35:01 | 25.304 |
| 2/6/2011 15:46:01 | 30.771 | 2/2/2011 21:55:01 | 25.304 |
| 2/6/2011 16:06:01 | 29.522 | 2/2/2011 22:15:01 | 25.304 |
| 2/6/2011 16:26:01 | 29.397 | 2/2/2011 22:35:01 | 25.242 |
| 2/6/2011 16:46:01 | 29.272 | 2/2/2011 22:55:01 | 25.242 |
| 2/6/2011 17:06:01 | 28.772 | 2/2/2011 23:15:01 | 25.242 |
| 2/6/2011 17:26:01 | 28.710 | 2/2/2011 23:35:01 | 25.242 |
| 2/6/2011 17:46:01 | 28.335 | 2/2/2011 23:55:01 | 25.242 |
| 2/6/2011 18:06:01 | 27.211 | 2/3/2011 00:15:01 | 25.242 |
| 2/6/2011 18:26:01 | 26.211 | 2/3/2011 00:35:01 | 25.242 |
| 2/6/2011 18:46:01 | 25.649 | 2/3/2011 00:55:01 | 25.242 |
| 2/6/2011 19:06:01 | 25.336 | 2/3/2011 01:15:01 | 25.242 |
| 2/6/2011 19:26:01 | 25.086 | 2/3/2011 01:35:01 | 25.179 |
| 2/6/2011 19:46:01 | 24.899 | 2/3/2011 01:55:01 | 25.179 |
| 2/6/2011 20:06:01 | 24.774 | 2/3/2011 02:15:01 | 25.179 |
| 2/6/2011 20:26:01 | 24.836 | 2/3/2011 02:35:01 | 25.179 |
| 2/6/2011 20:46:01 | 25.586 | 2/3/2011 02:55:01 | 25.179 |
| 2/6/2011 21:06:01 | 24.836 | 2/3/2011 03:15:01 | 25.179 |
| 2/6/2011 21:26:01 | 24.336 | 2/3/2011 03:35:01 | 25.179 |
| 2/6/2011 21:46:01 | 24.336 | 2/3/2011 03:55:01 | 25.117 |
| 2/6/2011 22:06:01 | 24.273 | 2/3/2011 04:15:01 | 25.117 |
| 2/6/2011 22:26:01 | 24.211 | 2/3/2011 04:35:01 | 25.117 |
| 2/6/2011 22:46:01 | 24.086 | 2/3/2011 04:55:01 | 25.117 |
| 2/6/2011 23:06:01 | 23.773 | 2/3/2011 05:15:01 | 25.117 |
| 2/6/2011 23:26:01 | 23.648 | 2/3/2011 05:35:01 | 25.117 |
| 2/6/2011 23:46:01 | 23.398 | 2/3/2011 05:55:01 | 25.117 |
| 2/7/2011 00:06:01 | 23.211 | 2/3/2011 06:15:01 | 25.054 |
| 2/7/2011 00:26:01 | 23.211 | 2/3/2011 06:35:01 | 25.054 |
| 2/7/2011 00:46:01 | 23.211 | 2/3/2011 06:55:01 | 25.054 |
| 2/7/2011 01:06:01 | 23.211 | 2/3/2011 07:15:01 | 25.054 |
| 2/7/2011 01:26:01 | 23.211 | 2/3/2011 07:35:01 | 25.054 |
| 2/7/2011 01:46:01 | 23.336 | 2/3/2011 07:55:01 | 24.992 |
| 2/7/2011 02:06:01 | 23.523 | 2/3/2011 08:15:01 | 24.992 |
| 2/7/2011 02:26:01 | 23.586 | 2/3/2011 08:35:01 | 24.992 |
| 2/7/2011 02:46:01 | 23.648 | 2/3/2011 08:55:01 | 24.992 |
| 2/7/2011 03:06:01 | 23.711 | 2/3/2011 09:15:01 | 24.992 |
| 2/7/2011 03:26:01 | 23.648 | 2/3/2011 09:35:01 | 24.992 |
| 2/7/2011 03:46:01 | 23.711 | 2/3/2011 09:55:01 | 24.992 |
| 2/7/2011 04:06:01 | 23.773 | 2/3/2011 10:15:01 | 24.992 |

|                   |        |                   |        |
|-------------------|--------|-------------------|--------|
| 2/7/2011 04:26:01 | 23.836 | 2/3/2011 10:35:01 | 24.992 |
| 2/7/2011 04:46:01 | 23.711 | 2/3/2011 10:55:01 | 24.992 |
| 2/7/2011 05:06:01 | 23.523 | 2/3/2011 11:15:01 | 24.992 |
| 2/7/2011 05:26:01 | 23.461 | 2/3/2011 11:35:01 | 24.992 |
| 2/7/2011 05:46:01 | 23.336 | 2/3/2011 11:55:01 | 24.992 |
| 2/7/2011 06:06:01 | 23.211 | 2/3/2011 12:15:01 | 24.992 |
| 2/7/2011 06:26:01 | 23.336 | 2/3/2011 12:35:01 | 24.992 |
| 2/7/2011 06:46:01 | 23.898 | 2/3/2011 12:55:01 | 24.992 |
| 2/7/2011 07:06:01 | 24.211 | 2/3/2011 13:15:01 | 25.054 |
| 2/7/2011 07:26:01 | 24.523 | 2/3/2011 13:35:01 | 25.054 |
| 2/7/2011 07:46:01 | 24.711 | 2/3/2011 13:55:01 | 25.054 |
| 2/7/2011 08:06:01 | 25.024 | 2/3/2011 14:15:01 | 24.992 |
| 2/7/2011 08:26:01 | 25.336 | 2/3/2011 14:35:01 | 25.054 |
| 2/7/2011 08:46:01 | 25.649 | 2/3/2011 14:55:01 | 25.054 |
| 2/7/2011 09:06:01 | 26.148 | 2/3/2011 15:15:01 | 25.054 |
| 2/7/2011 09:26:01 | 26.461 | 2/3/2011 15:35:01 | 25.054 |
| 2/7/2011 09:46:01 | 26.773 | 2/3/2011 15:55:01 | 25.054 |
| 2/7/2011 10:06:01 | 27.148 | 2/3/2011 16:15:01 | 25.054 |
| 2/7/2011 10:26:01 | 27.398 | 2/3/2011 16:35:01 | 25.117 |
| 2/7/2011 10:46:01 | 27.461 | 2/3/2011 16:55:01 | 25.117 |
| 2/7/2011 11:06:01 | 27.710 | 2/3/2011 17:15:01 | 25.117 |
| 2/7/2011 11:26:01 | 28.023 | 2/3/2011 17:35:01 | 25.117 |
| 2/7/2011 11:46:01 | 28.210 | 2/3/2011 17:55:01 | 25.117 |
| 2/7/2011 12:06:01 | 28.398 | 2/3/2011 18:15:01 | 25.179 |
| 2/7/2011 12:26:01 | 28.647 | 2/3/2011 18:35:01 | 25.179 |
| 2/7/2011 12:46:01 | 29.210 | 2/3/2011 18:55:01 | 25.179 |
| 2/7/2011 13:06:01 | 29.647 | 2/3/2011 19:15:01 | 25.179 |
| 2/7/2011 13:26:01 | 29.334 | 2/3/2011 19:35:01 | 25.179 |
| 2/7/2011 13:46:01 | 29.834 | 2/3/2011 19:55:01 | 25.179 |
| 2/7/2011 14:06:01 | 30.021 | 2/3/2011 20:15:01 | 25.242 |
| 2/7/2011 14:26:01 | 29.959 | 2/3/2011 20:35:01 | 25.242 |
| 2/7/2011 14:46:01 | 30.021 | 2/3/2011 20:55:01 | 25.242 |
| 2/7/2011 15:06:01 | 29.834 | 2/3/2011 21:15:01 | 25.242 |
| 2/7/2011 15:26:01 | 29.584 | 2/3/2011 21:35:01 | 25.242 |
| 2/7/2011 15:46:01 | 29.147 | 2/3/2011 21:55:01 | 25.242 |
| 2/7/2011 16:06:01 | 28.960 | 2/3/2011 22:15:01 | 25.242 |
| 2/7/2011 16:26:01 | 28.772 | 2/3/2011 22:35:01 | 25.242 |
| 2/7/2011 16:46:01 | 28.647 | 2/3/2011 22:55:01 | 25.242 |
| 2/7/2011 17:06:01 | 28.398 | 2/3/2011 23:15:01 | 25.242 |
| 2/7/2011 17:26:01 | 28.085 | 2/3/2011 23:35:01 | 25.242 |
| 2/7/2011 17:46:01 | 27.898 | 2/3/2011 23:55:01 | 25.242 |
| 2/7/2011 18:06:01 | 27.648 | 2/4/2011 00:15:01 | 25.242 |
| 2/7/2011 18:26:01 | 27.336 | 2/4/2011 00:35:01 | 25.242 |
| 2/7/2011 18:46:01 | 27.023 | 2/4/2011 00:55:01 | 25.242 |
| 2/7/2011 19:06:01 | 26.648 | 2/4/2011 01:15:01 | 25.242 |
| 2/7/2011 19:26:01 | 25.899 | 2/4/2011 01:35:01 | 25.179 |
| 2/7/2011 19:46:01 | 24.648 | 2/4/2011 01:55:01 | 25.179 |
| 2/7/2011 20:06:01 | 24.461 | 2/4/2011 02:15:01 | 25.179 |
| 2/7/2011 20:26:01 | 24.398 | 2/4/2011 02:35:01 | 25.179 |
| 2/7/2011 20:46:01 | 24.398 | 2/4/2011 02:55:01 | 25.117 |

|                   |        |                   |        |
|-------------------|--------|-------------------|--------|
| 2/7/2011 21:06:01 | 24.398 | 2/4/2011 03:15:01 | 25.117 |
| 2/7/2011 21:26:01 | 24.398 | 2/4/2011 03:35:01 | 25.054 |
| 2/7/2011 21:46:01 | 24.211 | 2/4/2011 03:55:01 | 24.992 |
| 2/7/2011 22:06:01 | 24.086 | 2/4/2011 04:15:01 | 24.929 |
| 2/7/2011 22:26:01 | 23.961 | 2/4/2011 04:35:01 | 24.929 |
| 2/7/2011 22:46:01 | 23.836 | 2/4/2011 04:55:01 | 24.867 |
| 2/7/2011 23:06:01 | 23.711 | 2/4/2011 05:15:01 | 24.804 |
| 2/7/2011 23:26:01 | 23.711 | 2/4/2011 05:35:01 | 24.804 |
| 2/7/2011 23:46:01 | 23.586 | 2/4/2011 05:55:01 | 24.742 |
| 2/8/2011 00:06:01 | 23.461 | 2/4/2011 06:15:01 | 24.742 |
| 2/8/2011 00:26:01 | 23.461 | 2/4/2011 06:35:01 | 24.679 |
| 2/8/2011 00:46:01 | 23.461 | 2/4/2011 06:55:01 | 24.679 |
| 2/8/2011 01:06:01 | 23.523 | 2/4/2011 07:15:01 | 24.617 |
| 2/8/2011 01:26:01 | 23.523 | 2/4/2011 07:35:01 | 24.617 |
| 2/8/2011 01:46:01 | 23.586 | 2/4/2011 07:55:01 | 24.617 |
| 2/8/2011 02:06:01 | 23.648 | 2/4/2011 08:15:01 | 24.554 |
| 2/8/2011 02:26:01 | 23.898 | 2/4/2011 08:35:01 | 24.554 |
| 2/8/2011 02:46:01 | 24.086 | 2/4/2011 08:55:01 | 24.554 |
| 2/8/2011 03:06:01 | 24.086 | 2/4/2011 09:15:01 | 24.554 |
| 2/8/2011 03:26:01 | 24.023 | 2/4/2011 09:35:01 | 24.554 |
| 2/8/2011 03:46:01 | 23.836 | 2/4/2011 09:55:01 | 24.492 |
| 2/8/2011 04:06:01 | 23.836 | 2/4/2011 10:15:01 | 24.492 |
| 2/8/2011 04:26:01 | 23.898 | 2/4/2011 10:35:01 | 24.492 |
| 2/8/2011 04:46:01 | 23.898 | 2/4/2011 10:55:01 | 24.492 |
| 2/8/2011 05:06:01 | 23.898 | 2/4/2011 11:15:01 | 24.492 |
| 2/8/2011 05:26:01 | 23.836 | 2/4/2011 11:35:01 | 24.492 |
| 2/8/2011 05:46:01 | 23.898 | 2/4/2011 11:55:01 | 24.492 |
| 2/8/2011 06:06:01 | 23.961 | 2/4/2011 12:15:01 | 24.492 |
| 2/8/2011 06:26:01 | 24.211 | 2/4/2011 12:35:01 | 24.492 |
| 2/8/2011 06:46:01 | 24.461 | 2/4/2011 12:55:01 | 24.554 |
| 2/8/2011 07:06:01 | 24.586 | 2/4/2011 13:15:01 | 24.554 |
| 2/8/2011 07:26:01 | 24.774 | 2/4/2011 13:35:01 | 24.554 |
| 2/8/2011 07:46:01 | 25.086 | 2/4/2011 13:55:01 | 24.617 |
| 2/8/2011 08:06:01 | 25.211 | 2/4/2011 14:15:01 | 24.617 |
| 2/8/2011 08:26:01 | 25.586 | 2/4/2011 14:35:01 | 24.617 |
| 2/8/2011 08:46:01 | 25.899 | 2/4/2011 14:55:01 | 24.617 |
| 2/8/2011 09:06:01 | 26.711 | 2/4/2011 15:15:01 | 24.679 |
| 2/8/2011 09:26:01 | 27.648 | 2/4/2011 15:35:01 | 24.679 |
| 2/8/2011 09:46:01 | 28.647 | 2/4/2011 15:55:01 | 24.679 |
| 2/8/2011 10:06:01 | 29.459 | 2/4/2011 16:15:01 | 24.742 |
| 2/8/2011 10:26:01 | 29.334 | 2/4/2011 16:35:01 | 24.742 |
| 2/8/2011 10:46:01 | 29.896 | 2/4/2011 16:55:01 | 24.742 |
| 2/8/2011 11:06:01 | 29.334 | 2/4/2011 17:15:01 | 24.742 |
| 2/8/2011 11:26:01 | 30.646 | 2/4/2011 17:35:01 | 24.742 |
| 2/8/2011 11:46:01 | 30.021 | 2/4/2011 17:55:01 | 24.804 |
| 2/8/2011 12:06:01 | 30.334 | 2/4/2011 18:15:01 | 24.804 |
| 2/8/2011 12:26:01 | 29.647 | 2/4/2011 18:35:01 | 24.804 |
| 2/8/2011 12:46:01 | 31.083 | 2/4/2011 18:55:01 | 24.804 |
| 2/8/2011 13:06:01 | 31.395 | 2/4/2011 19:15:01 | 24.867 |
| 2/8/2011 13:26:01 | 32.269 | 2/4/2011 19:35:01 | 24.867 |

|                   |        |                   |        |
|-------------------|--------|-------------------|--------|
| 2/8/2011 13:46:01 | 32.019 | 2/4/2011 19:55:01 | 24.867 |
| 2/8/2011 14:06:01 | 32.456 | 2/4/2011 20:15:01 | 24.867 |
| 2/8/2011 14:26:01 | 32.206 | 2/4/2011 20:35:01 | 24.867 |
| 2/8/2011 14:46:01 | 32.019 | 2/4/2011 20:55:01 | 24.867 |
| 2/8/2011 15:06:01 | 31.832 | 2/4/2011 21:15:01 | 24.867 |
| 2/8/2011 15:26:01 | 31.645 | 2/4/2011 21:35:01 | 24.867 |
| 2/8/2011 15:46:01 | 30.895 | 2/4/2011 21:55:01 | 24.867 |
| 2/8/2011 16:06:01 | 30.334 | 2/4/2011 22:15:01 | 24.867 |
| 2/8/2011 16:26:01 | 29.896 | 2/4/2011 22:35:01 | 24.867 |
| 2/8/2011 16:46:01 | 29.522 | 2/4/2011 22:55:01 | 24.867 |
| 2/8/2011 17:06:01 | 29.022 | 2/4/2011 23:15:01 | 24.867 |
| 2/8/2011 17:26:01 | 29.085 | 2/4/2011 23:35:01 | 24.867 |
| 2/8/2011 17:46:01 | 28.960 | 2/4/2011 23:55:01 | 24.867 |
| 2/8/2011 18:06:01 | 28.585 | 2/5/2011 00:15:01 | 24.867 |
| 2/8/2011 18:26:01 | 28.335 | 2/5/2011 00:35:01 | 24.867 |
| 2/8/2011 18:46:01 | 27.586 | 2/5/2011 00:55:01 | 24.804 |
| 2/8/2011 19:06:01 | 26.148 | 2/5/2011 01:15:01 | 24.804 |
| 2/8/2011 19:26:01 | 25.711 | 2/5/2011 01:35:01 | 24.804 |
| 2/8/2011 19:46:01 | 25.274 | 2/5/2011 01:55:01 | 24.804 |
| 2/8/2011 20:06:01 | 24.899 | 2/5/2011 02:15:01 | 24.804 |
| 2/8/2011 20:26:01 | 24.836 | 2/5/2011 02:35:01 | 24.804 |
| 2/8/2011 20:46:01 | 24.774 | 2/5/2011 02:55:01 | 24.804 |
| 2/8/2011 21:06:01 | 23.711 | 2/5/2011 03:15:01 | 24.804 |
| 2/8/2011 21:26:01 | 22.710 | 2/5/2011 03:35:01 | 24.804 |
| 2/8/2011 21:46:01 | 22.147 | 2/5/2011 03:55:01 | 24.804 |
| 2/8/2011 22:06:01 | 22.022 | 2/5/2011 04:15:01 | 24.804 |
| 2/8/2011 22:26:01 | 21.897 | 2/5/2011 04:35:01 | 24.742 |
| 2/8/2011 22:46:01 | 21.835 | 2/5/2011 04:55:01 | 24.742 |
| 2/8/2011 23:06:01 | 22.022 | 2/5/2011 05:15:01 | 24.742 |
| 2/8/2011 23:26:01 | 21.960 | 2/5/2011 05:35:01 | 24.742 |
| 2/8/2011 23:46:01 | 22.147 | 2/5/2011 05:55:01 | 24.742 |
| 2/9/2011 00:06:01 | 21.960 | 2/5/2011 06:15:01 | 24.742 |
| 2/9/2011 00:26:01 | 21.960 | 2/5/2011 06:35:01 | 24.742 |
| 2/9/2011 00:46:01 | 22.147 | 2/5/2011 06:55:01 | 24.679 |
| 2/9/2011 01:06:01 | 22.398 | 2/5/2011 07:15:01 | 24.679 |
| 2/9/2011 01:26:01 | 22.585 | 2/5/2011 07:35:01 | 24.679 |
| 2/9/2011 01:46:01 | 22.773 | 2/5/2011 07:55:01 | 24.679 |
| 2/9/2011 02:06:01 | 22.835 | 2/5/2011 08:15:01 | 24.679 |
| 2/9/2011 02:26:01 | 22.710 | 2/5/2011 08:35:01 | 24.679 |
| 2/9/2011 02:46:01 | 22.460 | 2/5/2011 08:55:01 | 24.617 |
| 2/9/2011 03:06:01 | 22.335 | 2/5/2011 09:15:01 | 24.617 |
| 2/9/2011 03:26:01 | 22.273 | 2/5/2011 09:35:01 | 24.617 |
| 2/9/2011 03:46:01 | 22.210 | 2/5/2011 09:55:01 | 24.617 |
| 2/9/2011 04:06:01 | 22.210 | 2/5/2011 10:15:01 | 24.617 |
| 2/9/2011 04:26:01 | 22.022 | 2/5/2011 10:35:01 | 24.617 |
| 2/9/2011 04:46:01 | 21.960 | 2/5/2011 10:55:01 | 24.617 |
| 2/9/2011 05:06:01 | 21.835 | 2/5/2011 11:15:01 | 24.617 |
| 2/9/2011 05:26:01 | 21.772 | 2/5/2011 11:35:01 | 24.617 |
| 2/9/2011 05:46:01 | 21.710 | 2/5/2011 11:55:01 | 24.617 |
| 2/9/2011 06:06:01 | 21.710 | 2/5/2011 12:15:01 | 24.679 |

|                   |        |                   |        |
|-------------------|--------|-------------------|--------|
| 2/9/2011 06:26:01 | 22.022 | 2/5/2011 12:35:01 | 24.679 |
| 2/9/2011 06:46:01 | 22.523 | 2/5/2011 12:55:01 | 24.742 |
| 2/9/2011 07:06:01 | 23.148 | 2/5/2011 13:15:01 | 24.742 |
| 2/9/2011 07:26:01 | 24.023 | 2/5/2011 13:35:01 | 24.804 |
| 2/9/2011 07:46:01 | 24.899 | 2/5/2011 13:55:01 | 24.804 |
| 2/9/2011 08:06:01 | 26.086 | 2/5/2011 14:15:01 | 24.867 |
| 2/9/2011 08:26:01 | 27.086 | 2/5/2011 14:35:01 | 24.867 |
| 2/9/2011 08:46:01 | 27.648 | 2/5/2011 14:55:01 | 24.929 |
| 2/9/2011 09:06:01 | 27.586 | 2/5/2011 15:15:01 | 24.929 |
| 2/9/2011 09:26:01 | 28.085 | 2/5/2011 15:35:01 | 24.992 |
| 2/9/2011 09:46:01 | 28.523 | 2/5/2011 15:55:01 | 24.992 |
| 2/9/2011 10:06:01 | 28.148 | 2/5/2011 16:15:01 | 24.992 |
| 2/9/2011 10:26:01 | 29.397 | 2/5/2011 16:35:01 | 25.054 |
| 2/9/2011 10:46:01 | 30.146 | 2/5/2011 16:55:01 | 25.054 |
| 2/9/2011 11:06:01 | 30.271 | 2/5/2011 17:15:01 | 25.117 |
| 2/9/2011 11:26:01 | 30.396 | 2/5/2011 17:35:01 | 25.117 |
| 2/9/2011 11:46:01 | 30.521 | 2/5/2011 17:55:01 | 25.117 |
| 2/9/2011 12:06:01 | 30.833 | 2/5/2011 18:15:01 | 25.179 |
| 2/9/2011 12:26:01 | 31.520 | 2/5/2011 18:35:01 | 25.179 |
| 2/9/2011 12:46:01 | 32.144 | 2/5/2011 18:55:01 | 25.179 |
| 2/9/2011 13:06:01 | 32.518 | 2/5/2011 19:15:01 | 25.179 |
| 2/9/2011 13:26:01 | 32.394 | 2/5/2011 19:35:01 | 25.242 |
| 2/9/2011 13:46:01 | 32.269 | 2/5/2011 19:55:01 | 25.242 |
| 2/9/2011 14:06:01 | 32.581 | 2/5/2011 20:15:01 | 25.242 |
| 2/9/2011 14:26:01 | 32.581 | 2/5/2011 20:35:01 | 25.242 |
| 2/9/2011 14:46:01 | 32.706 | 2/5/2011 20:55:01 | 25.242 |
| 2/9/2011 15:06:01 | 32.269 | 2/5/2011 21:15:01 | 25.242 |
| 2/9/2011 15:26:01 | 31.707 | 2/5/2011 21:35:01 | 25.242 |
| 2/9/2011 15:46:01 | 31.270 | 2/5/2011 21:55:01 | 25.242 |
| 2/9/2011 16:06:01 | 30.771 | 2/5/2011 22:15:01 | 25.242 |
| 2/9/2011 16:26:01 | 30.521 | 2/5/2011 22:35:01 | 25.242 |
| 2/9/2011 16:46:01 | 30.146 | 2/5/2011 22:55:01 | 25.242 |
| 2/9/2011 17:06:01 | 29.772 | 2/5/2011 23:15:01 | 25.242 |
| 2/9/2011 17:26:01 | 29.085 | 2/5/2011 23:35:01 | 25.242 |
| 2/9/2011 17:46:01 | 28.523 | 2/5/2011 23:55:01 | 25.242 |
| 2/9/2011 18:06:01 | 28.023 | 2/6/2011 00:15:01 | 25.242 |
| 2/9/2011 18:26:01 | 27.336 | 2/6/2011 00:35:01 | 25.242 |
| 2/9/2011 18:46:01 | 26.711 | 2/6/2011 00:55:01 | 25.179 |
| 2/9/2011 19:06:01 | 26.211 | 2/6/2011 01:15:01 | 25.179 |
| 2/9/2011 19:26:01 | 25.961 | 2/6/2011 01:35:01 | 25.117 |
| 2/9/2011 19:46:01 | 25.899 | 2/6/2011 01:55:01 | 25.117 |
| 2/9/2011 20:06:01 | 25.711 | 2/6/2011 02:15:01 | 25.117 |
| 2/9/2011 20:26:01 | 25.586 | 2/6/2011 02:35:01 | 25.054 |
| 2/9/2011 20:46:01 | 25.399 | 2/6/2011 02:55:01 | 24.992 |
| 2/9/2011 21:06:01 | 25.211 | 2/6/2011 03:15:01 | 24.992 |
| 2/9/2011 21:26:01 | 25.149 | 2/6/2011 03:35:01 | 24.929 |
| 2/9/2011 21:46:01 | 24.836 | 2/6/2011 03:55:01 | 24.929 |
| 2/9/2011 22:06:01 | 24.711 | 2/6/2011 04:15:01 | 24.929 |
| 2/9/2011 22:26:01 | 24.586 | 2/6/2011 04:35:01 | 24.867 |
| 2/9/2011 22:46:01 | 24.336 | 2/6/2011 04:55:01 | 24.867 |

|                    |        |                   |        |
|--------------------|--------|-------------------|--------|
| 2/9/2011 23:06:01  | 24.273 | 2/6/2011 05:15:01 | 24.804 |
| 2/9/2011 23:26:01  | 24.211 | 2/6/2011 05:35:01 | 24.804 |
| 2/9/2011 23:46:01  | 24.086 | 2/6/2011 05:55:01 | 24.804 |
| 2/10/2011 00:06:01 | 24.086 | 2/6/2011 06:15:01 | 24.742 |
| 2/10/2011 00:26:01 | 24.023 | 2/6/2011 06:35:01 | 24.742 |
| 2/10/2011 00:46:01 | 24.086 | 2/6/2011 06:55:01 | 24.742 |
| 2/10/2011 01:06:01 | 23.961 | 2/6/2011 07:15:01 | 24.742 |
| 2/10/2011 01:26:01 | 23.711 | 2/6/2011 07:35:01 | 24.679 |
| 2/10/2011 01:46:01 | 23.586 | 2/6/2011 07:55:01 | 24.679 |
| 2/10/2011 02:06:01 | 23.398 | 2/6/2011 08:15:01 | 24.679 |
| 2/10/2011 02:26:01 | 23.211 | 2/6/2011 08:35:01 | 24.679 |
| 2/10/2011 02:46:01 | 23.148 | 2/6/2011 08:55:01 | 24.617 |
| 2/10/2011 03:06:01 | 23.211 | 2/6/2011 09:15:01 | 24.617 |
| 2/10/2011 03:26:01 | 23.273 | 2/6/2011 09:35:01 | 24.617 |
| 2/10/2011 03:46:01 | 23.336 | 2/6/2011 09:55:01 | 24.617 |
| 2/10/2011 04:06:01 | 23.211 | 2/6/2011 10:15:01 | 24.617 |
| 2/10/2011 04:26:01 | 23.023 | 2/6/2011 10:35:01 | 24.617 |
| 2/10/2011 04:46:01 | 22.898 | 2/6/2011 10:55:01 | 24.617 |
| 2/10/2011 05:06:01 | 22.898 | 2/6/2011 11:15:01 | 24.617 |
| 2/10/2011 05:26:01 | 22.835 | 2/6/2011 11:35:01 | 24.679 |
| 2/10/2011 05:46:01 | 22.710 | 2/6/2011 11:55:01 | 24.679 |
| 2/10/2011 06:06:01 | 22.523 | 2/6/2011 12:15:01 | 24.679 |
| 2/10/2011 06:26:01 | 22.710 | 2/6/2011 12:35:01 | 24.742 |
| 2/10/2011 06:46:01 | 23.273 | 2/6/2011 12:55:01 | 24.742 |
| 2/10/2011 07:06:01 | 24.086 | 2/6/2011 13:15:01 | 24.742 |
| 2/10/2011 07:26:01 | 24.836 | 2/6/2011 13:35:01 | 24.804 |
| 2/10/2011 07:46:01 | 25.586 | 2/6/2011 13:55:01 | 24.804 |
| 2/10/2011 08:06:01 | 26.336 | 2/6/2011 14:15:01 | 24.867 |
| 2/10/2011 08:26:01 | 27.148 | 2/6/2011 14:35:01 | 24.867 |
| 2/10/2011 08:46:01 | 28.023 | 2/6/2011 14:55:01 | 24.929 |
| 2/10/2011 09:06:01 | 28.647 | 2/6/2011 15:15:01 | 24.929 |
| 2/10/2011 09:26:01 | 28.647 | 2/6/2011 15:35:01 | 24.992 |
| 2/10/2011 09:46:01 | 29.772 | 2/6/2011 15:55:01 | 24.992 |
| 2/10/2011 10:06:01 | 29.334 | 2/6/2011 16:15:01 | 24.992 |
| 2/10/2011 10:26:01 | 30.209 | 2/6/2011 16:35:01 | 25.054 |
| 2/10/2011 10:46:01 | 30.521 | 2/6/2011 16:55:01 | 25.054 |
| 2/10/2011 11:06:01 | 30.021 | 2/6/2011 17:15:01 | 25.054 |
| 2/10/2011 11:26:01 | 31.083 | 2/6/2011 17:35:01 | 25.117 |
| 2/10/2011 11:46:01 | 32.019 | 2/6/2011 17:55:01 | 25.117 |
| 2/10/2011 12:06:01 | 31.957 | 2/6/2011 18:15:01 | 25.117 |
| 2/10/2011 12:26:01 | 32.394 | 2/6/2011 18:35:01 | 25.179 |
| 2/10/2011 12:46:01 | 31.020 | 2/6/2011 18:55:01 | 25.179 |
| 2/10/2011 13:06:01 | 31.832 | 2/6/2011 19:15:01 | 25.179 |
| 2/10/2011 13:26:01 | 33.454 | 2/6/2011 19:35:01 | 25.179 |
| 2/10/2011 13:46:01 | 33.454 | 2/6/2011 19:55:01 | 25.242 |
| 2/10/2011 14:06:01 | 32.081 | 2/6/2011 20:15:01 | 25.242 |
| 2/10/2011 14:26:01 | 33.142 | 2/6/2011 20:35:01 | 25.242 |
| 2/10/2011 14:46:01 | 32.269 | 2/6/2011 20:55:01 | 25.242 |
| 2/10/2011 15:06:01 | 31.457 | 2/6/2011 21:15:01 | 25.242 |
| 2/10/2011 15:26:01 | 30.583 | 2/6/2011 21:35:01 | 25.242 |

|                    |        |                   |        |
|--------------------|--------|-------------------|--------|
| 2/10/2011 15:46:01 | 30.646 | 2/6/2011 21:55:01 | 25.242 |
| 2/10/2011 16:06:01 | 30.646 | 2/6/2011 22:15:01 | 25.242 |
| 2/10/2011 16:26:01 | 30.271 | 2/6/2011 22:35:01 | 25.242 |
| 2/10/2011 16:46:01 | 29.834 | 2/6/2011 22:55:01 | 25.242 |
| 2/10/2011 17:06:01 | 29.459 | 2/6/2011 23:15:01 | 25.242 |
| 2/10/2011 17:26:01 | 29.147 | 2/6/2011 23:35:01 | 25.242 |
| 2/10/2011 17:46:01 | 28.835 | 2/6/2011 23:55:01 | 25.179 |
| 2/10/2011 18:06:01 | 28.398 | 2/7/2011 00:15:01 | 25.179 |
| 2/10/2011 18:26:01 | 27.773 | 2/7/2011 00:35:01 | 25.179 |
| 2/10/2011 18:46:01 | 27.211 | 2/7/2011 00:55:01 | 25.179 |
| 2/10/2011 19:06:01 | 26.836 | 2/7/2011 01:15:01 | 25.179 |
| 2/10/2011 19:26:01 | 26.523 | 2/7/2011 01:35:01 | 25.179 |
| 2/10/2011 19:46:01 | 26.211 | 2/7/2011 01:55:01 | 25.117 |
| 2/10/2011 20:06:01 | 25.899 | 2/7/2011 02:15:01 | 25.117 |
| 2/10/2011 20:26:01 | 25.711 | 2/7/2011 02:35:01 | 25.117 |
| 2/10/2011 20:46:01 | 25.586 | 2/7/2011 02:55:01 | 25.117 |
| 2/10/2011 21:06:01 | 25.524 | 2/7/2011 03:15:01 | 25.117 |
| 2/10/2011 21:26:01 | 25.711 | 2/7/2011 03:35:01 | 25.054 |
| 2/10/2011 21:46:01 | 25.836 | 2/7/2011 03:55:01 | 25.054 |
| 2/10/2011 22:06:01 | 25.961 | 2/7/2011 04:15:01 | 25.054 |
| 2/10/2011 22:26:01 | 25.774 | 2/7/2011 04:35:01 | 25.054 |
| 2/10/2011 22:46:01 | 25.336 | 2/7/2011 04:55:01 | 25.054 |
| 2/10/2011 23:06:01 | 24.836 | 2/7/2011 05:15:01 | 24.992 |
| 2/10/2011 23:26:01 | 24.648 | 2/7/2011 05:35:01 | 24.992 |
| 2/10/2011 23:46:01 | 24.336 | 2/7/2011 05:55:01 | 24.992 |
| 2/11/2011 00:06:01 | 24.086 | 2/7/2011 06:15:01 | 24.992 |
| 2/11/2011 00:26:01 | 23.898 | 2/7/2011 06:35:01 | 24.992 |
| 2/11/2011 00:46:01 | 23.711 | 2/7/2011 06:55:01 | 24.929 |
| 2/11/2011 01:06:01 | 23.648 | 2/7/2011 07:15:01 | 24.929 |
| 2/11/2011 01:26:01 | 23.523 | 2/7/2011 07:35:01 | 24.929 |
| 2/11/2011 01:46:01 | 23.461 | 2/7/2011 07:55:01 | 24.929 |
| 2/11/2011 02:06:01 | 23.523 | 2/7/2011 08:15:01 | 24.929 |
| 2/11/2011 02:26:01 | 23.461 | 2/7/2011 08:35:01 | 24.929 |
| 2/11/2011 02:46:01 | 23.461 | 2/7/2011 08:55:01 | 24.867 |
| 2/11/2011 03:06:01 | 23.523 | 2/7/2011 09:15:01 | 24.867 |
| 2/11/2011 03:26:01 | 23.523 | 2/7/2011 09:35:01 | 24.867 |
| 2/11/2011 03:46:01 | 23.523 | 2/7/2011 09:55:01 | 24.867 |
| 2/11/2011 04:06:01 | 23.336 | 2/7/2011 10:15:01 | 24.867 |
| 2/11/2011 04:26:01 | 23.148 | 2/7/2011 10:35:01 | 24.867 |
| 2/11/2011 04:46:01 | 23.023 | 2/7/2011 10:55:01 | 24.867 |
| 2/11/2011 05:06:01 | 22.898 | 2/7/2011 11:15:01 | 24.867 |
| 2/11/2011 05:26:01 | 22.835 | 2/7/2011 11:35:01 | 24.867 |
| 2/11/2011 05:46:01 | 22.648 | 2/7/2011 11:55:01 | 24.867 |
| 2/11/2011 06:06:01 | 22.648 | 2/7/2011 12:15:01 | 24.867 |
| 2/11/2011 06:26:01 | 22.710 | 2/7/2011 12:35:01 | 24.867 |
| 2/11/2011 06:46:01 | 23.148 | 2/7/2011 12:55:01 | 24.929 |
| 2/11/2011 07:06:01 | 23.773 | 2/7/2011 13:15:01 | 24.929 |
| 2/11/2011 07:26:01 | 24.711 | 2/7/2011 13:35:01 | 24.929 |
| 2/11/2011 07:46:01 | 25.649 | 2/7/2011 13:55:01 | 24.929 |
| 2/11/2011 08:06:01 | 26.461 | 2/7/2011 14:15:01 | 24.929 |



|                    |        |                   |        |
|--------------------|--------|-------------------|--------|
| 2/11/2011 08:26:01 | 27.461 | 2/7/2011 14:35:01 | 24.992 |
| 2/11/2011 08:46:01 | 28.148 | 2/7/2011 14:55:01 | 24.992 |
| 2/11/2011 09:06:01 | 28.085 | 2/7/2011 15:15:01 | 24.992 |
| 2/11/2011 09:26:01 | 28.523 | 2/7/2011 15:35:01 | 24.992 |
| 2/11/2011 09:46:01 | 28.960 | 2/7/2011 15:55:01 | 25.054 |
| 2/11/2011 10:06:01 | 29.085 | 2/7/2011 16:15:01 | 25.054 |
| 2/11/2011 10:26:01 | 29.334 | 2/7/2011 16:35:01 | 25.054 |
| 2/11/2011 10:46:01 | 30.708 | 2/7/2011 16:55:01 | 25.117 |
| 2/11/2011 11:06:01 | 31.520 | 2/7/2011 17:15:01 | 25.117 |
| 2/11/2011 11:26:01 | 32.456 | 2/7/2011 17:35:01 | 25.117 |
| 2/11/2011 11:46:01 | 31.457 | 2/7/2011 17:55:01 | 25.179 |
| 2/11/2011 12:06:01 | 31.395 | 2/7/2011 18:15:01 | 25.179 |
| 2/11/2011 12:26:01 | 31.769 | 2/7/2011 18:35:01 | 25.179 |
| 2/11/2011 12:46:01 | 31.332 | 2/7/2011 18:55:01 | 25.242 |
| 2/11/2011 13:06:01 | 31.145 | 2/7/2011 19:15:01 | 25.242 |
| 2/11/2011 13:26:01 | 30.708 | 2/7/2011 19:35:01 | 25.242 |
| 2/11/2011 13:46:01 | 32.019 | 2/7/2011 19:55:01 | 25.242 |
| 2/11/2011 14:06:01 | 33.267 | 2/7/2011 20:15:01 | 25.242 |
| 2/11/2011 14:26:01 | 33.642 | 2/7/2011 20:35:01 | 25.304 |
| 2/11/2011 14:46:01 | 33.080 | 2/7/2011 20:55:01 | 25.304 |
| 2/11/2011 15:06:01 | 32.394 | 2/7/2011 21:15:01 | 25.304 |
| 2/11/2011 15:26:01 | 30.833 | 2/7/2011 21:35:01 | 25.304 |
| 2/11/2011 15:46:01 | 30.708 | 2/7/2011 21:55:01 | 25.304 |
| 2/11/2011 16:06:01 | 30.084 | 2/7/2011 22:15:01 | 25.304 |
| 2/11/2011 16:26:01 | 29.772 | 2/7/2011 22:35:01 | 25.304 |
| 2/11/2011 16:46:01 | 29.959 | 2/7/2011 22:55:01 | 25.304 |
| 2/11/2011 17:06:01 | 29.272 | 2/7/2011 23:15:01 | 25.304 |
| 2/11/2011 17:26:01 | 29.022 | 2/7/2011 23:35:01 | 25.304 |
| 2/11/2011 17:46:01 | 28.772 | 2/7/2011 23:55:01 | 25.304 |
| 2/11/2011 18:06:01 | 28.273 | 2/8/2011 00:15:01 | 25.242 |
| 2/11/2011 18:26:01 | 27.773 | 2/8/2011 00:35:01 | 25.242 |
| 2/11/2011 18:46:01 | 27.211 | 2/8/2011 00:55:01 | 25.242 |
| 2/11/2011 19:06:01 | 26.773 | 2/8/2011 01:15:01 | 25.242 |
| 2/11/2011 19:26:01 | 26.398 | 2/8/2011 01:35:01 | 25.242 |
| 2/11/2011 19:46:01 | 26.086 | 2/8/2011 01:55:01 | 25.242 |
| 2/11/2011 20:06:01 | 25.899 | 2/8/2011 02:15:01 | 25.179 |
| 2/11/2011 20:26:01 | 25.711 | 2/8/2011 02:35:01 | 25.179 |
| 2/11/2011 20:46:01 | 25.649 | 2/8/2011 02:55:01 | 25.179 |
| 2/11/2011 21:06:01 | 25.836 | 2/8/2011 03:15:01 | 25.179 |
| 2/11/2011 21:26:01 | 25.836 | 2/8/2011 03:35:01 | 25.179 |
| 2/11/2011 21:46:01 | 25.711 | 2/8/2011 03:55:01 | 25.117 |
| 2/11/2011 22:06:01 | 25.774 | 2/8/2011 04:15:01 | 25.117 |
| 2/11/2011 22:26:01 | 25.836 | 2/8/2011 04:35:01 | 25.117 |
| 2/11/2011 22:46:01 | 25.336 | 2/8/2011 04:55:01 | 25.117 |
| 2/11/2011 23:06:01 | 24.774 | 2/8/2011 05:15:01 | 25.117 |
| 2/11/2011 23:26:01 | 24.398 | 2/8/2011 05:35:01 | 25.117 |
| 2/11/2011 23:46:01 | 24.023 | 2/8/2011 05:55:01 | 25.054 |
| 2/12/2011 00:06:01 | 23.773 | 2/8/2011 06:15:01 | 25.054 |
| 2/12/2011 00:26:01 | 23.586 | 2/8/2011 06:35:01 | 25.054 |
| 2/12/2011 00:46:01 | 23.461 | 2/8/2011 06:55:01 | 25.054 |

|                    |        |                   |        |
|--------------------|--------|-------------------|--------|
| 2/12/2011 01:06:01 | 23.461 | 2/8/2011 07:15:01 | 25.054 |
| 2/12/2011 01:26:01 | 23.273 | 2/8/2011 07:35:01 | 25.054 |
| 2/12/2011 01:46:01 | 23.336 | 2/8/2011 07:55:01 | 25.054 |
| 2/12/2011 02:06:01 | 23.586 | 2/8/2011 08:15:01 | 25.054 |
| 2/12/2011 02:26:01 | 23.836 | 2/8/2011 08:35:01 | 24.992 |
| 2/12/2011 02:46:01 | 23.773 | 2/8/2011 08:55:01 | 24.992 |
| 2/12/2011 03:06:01 | 23.648 | 2/8/2011 09:15:01 | 24.992 |
| 2/12/2011 03:26:01 | 23.648 | 2/8/2011 09:35:01 | 24.992 |
| 2/12/2011 03:46:01 | 23.773 | 2/8/2011 09:55:01 | 24.992 |
| 2/12/2011 04:06:01 | 23.711 | 2/8/2011 10:15:01 | 24.992 |
| 2/12/2011 04:26:01 | 23.648 | 2/8/2011 10:35:01 | 24.992 |
| 2/12/2011 04:46:01 | 23.711 | 2/8/2011 10:55:01 | 24.992 |
| 2/12/2011 05:06:01 | 23.711 | 2/8/2011 11:15:01 | 24.992 |
| 2/12/2011 05:26:01 | 23.648 | 2/8/2011 11:35:01 | 24.992 |
| 2/12/2011 05:46:01 | 23.523 | 2/8/2011 11:55:01 | 24.992 |
| 2/12/2011 06:06:01 | 23.523 | 2/8/2011 12:15:01 | 25.054 |
| 2/12/2011 06:26:01 | 23.648 | 2/8/2011 12:35:01 | 25.054 |
| 2/12/2011 06:46:01 | 23.898 | 2/8/2011 12:55:01 | 25.054 |
| 2/12/2011 07:06:01 | 24.336 | 2/8/2011 13:15:01 | 25.117 |
| 2/12/2011 07:26:01 | 24.961 | 2/8/2011 13:35:01 | 25.117 |
| 2/12/2011 07:46:01 | 25.711 | 2/8/2011 13:55:01 | 25.117 |
| 2/12/2011 08:06:01 | 26.773 | 2/8/2011 14:15:01 | 25.179 |
| 2/12/2011 08:26:01 | 27.648 | 2/8/2011 14:35:01 | 25.179 |
| 2/12/2011 08:46:01 | 28.335 | 2/8/2011 14:55:01 | 25.179 |
| 2/12/2011 09:06:01 | 28.897 | 2/8/2011 15:15:01 | 25.242 |
| 2/12/2011 09:26:01 | 29.522 | 2/8/2011 15:35:01 | 25.242 |
| 2/12/2011 09:46:01 | 30.084 | 2/8/2011 15:55:01 | 25.304 |
| 2/12/2011 10:06:01 | 30.833 | 2/8/2011 16:15:01 | 25.304 |
| 2/12/2011 10:26:01 | 31.457 | 2/8/2011 16:35:01 | 25.304 |
| 2/12/2011 10:46:01 | 31.957 | 2/8/2011 16:55:01 | 25.367 |
| 2/12/2011 11:06:01 | 32.456 | 2/8/2011 17:15:01 | 25.367 |
| 2/12/2011 11:26:01 | 32.893 | 2/8/2011 17:35:01 | 25.367 |
| 2/12/2011 11:46:01 | 33.267 | 2/8/2011 17:55:01 | 25.429 |
| 2/12/2011 12:06:01 | 33.642 | 2/8/2011 18:15:01 | 25.429 |
| 2/12/2011 12:26:01 | 33.891 | 2/8/2011 18:35:01 | 25.429 |
| 2/12/2011 12:46:01 | 34.016 | 2/8/2011 18:55:01 | 25.429 |
| 2/12/2011 13:06:01 | 34.328 | 2/8/2011 19:15:01 | 25.492 |
| 2/12/2011 13:26:01 | 34.453 | 2/8/2011 19:35:01 | 25.492 |
| 2/12/2011 13:46:01 | 34.640 | 2/8/2011 19:55:01 | 25.492 |
| 2/12/2011 14:06:01 | 34.702 | 2/8/2011 20:15:01 | 25.492 |
| 2/12/2011 14:26:01 | 34.577 | 2/8/2011 20:35:01 | 25.492 |
| 2/12/2011 14:46:01 | 34.702 | 2/8/2011 20:55:01 | 25.554 |
| 2/12/2011 15:06:01 | 34.453 | 2/8/2011 21:15:01 | 25.554 |
| 2/12/2011 15:26:01 | 33.579 | 2/8/2011 21:35:01 | 25.554 |
| 2/12/2011 15:46:01 | 32.643 | 2/8/2011 21:55:01 | 25.554 |
| 2/12/2011 16:06:01 | 31.832 | 2/8/2011 22:15:01 | 25.554 |
| 2/12/2011 16:26:01 | 30.833 | 2/8/2011 22:35:01 | 25.554 |
| 2/12/2011 16:46:01 | 30.209 | 2/8/2011 22:55:01 | 25.492 |
| 2/12/2011 17:06:01 | 29.709 | 2/8/2011 23:15:01 | 25.492 |
| 2/12/2011 17:26:01 | 29.147 | 2/8/2011 23:35:01 | 25.492 |

|                    |        |                   |        |
|--------------------|--------|-------------------|--------|
| 2/12/2011 17:46:01 | 28.647 | 2/8/2011 23:55:01 | 25.492 |
| 2/12/2011 18:06:01 | 28.023 | 2/9/2011 00:15:01 | 25.429 |
| 2/12/2011 18:26:01 | 27.461 | 2/9/2011 00:35:01 | 25.429 |
| 2/12/2011 18:46:01 | 27.086 | 2/9/2011 00:55:01 | 25.429 |
| 2/12/2011 19:06:01 | 26.773 | 2/9/2011 01:15:01 | 25.367 |
| 2/12/2011 19:26:01 | 26.586 | 2/9/2011 01:35:01 | 25.367 |
| 2/12/2011 19:46:01 | 26.461 | 2/9/2011 01:55:01 | 25.367 |
| 2/12/2011 20:06:01 | 26.273 | 2/9/2011 02:15:01 | 25.304 |
| 2/12/2011 20:26:01 | 26.648 | 2/9/2011 02:35:01 | 25.304 |
| 2/12/2011 20:46:01 | 26.898 | 2/9/2011 02:55:01 | 25.242 |
| 2/12/2011 21:06:01 | 27.148 | 2/9/2011 03:15:01 | 25.242 |
| 2/12/2011 21:26:01 | 27.461 | 2/9/2011 03:35:01 | 25.242 |
| 2/12/2011 21:46:01 | 26.211 | 2/9/2011 03:55:01 | 25.179 |
| 2/12/2011 22:06:01 | 21.897 | 2/9/2011 04:15:01 | 25.179 |
| 2/12/2011 22:26:01 | 21.459 | 2/9/2011 04:35:01 | 25.179 |
| 2/12/2011 22:46:01 | 21.835 | 2/9/2011 04:55:01 | 25.117 |
| 2/12/2011 23:06:01 | 22.210 | 2/9/2011 05:15:01 | 25.117 |
| 2/12/2011 23:26:01 | 22.648 | 2/9/2011 05:35:01 | 25.117 |
| 2/12/2011 23:46:01 | 22.710 | 2/9/2011 05:55:01 | 25.117 |
| 2/13/2011 00:06:01 | 22.773 | 2/9/2011 06:15:01 | 25.054 |
| 2/13/2011 00:26:01 | 22.835 | 2/9/2011 06:35:01 | 25.054 |
| 2/13/2011 00:46:01 | 22.898 | 2/9/2011 06:55:01 | 24.992 |
| 2/13/2011 01:06:01 | 22.960 | 2/9/2011 07:15:01 | 24.992 |
| 2/13/2011 01:26:01 | 22.898 | 2/9/2011 07:35:01 | 24.992 |
| 2/13/2011 01:46:01 | 22.773 | 2/9/2011 07:55:01 | 24.992 |
| 2/13/2011 02:06:01 | 22.773 | 2/9/2011 08:15:01 | 24.929 |
| 2/13/2011 02:26:01 | 22.773 | 2/9/2011 08:35:01 | 24.929 |
| 2/13/2011 02:46:01 | 22.835 | 2/9/2011 08:55:01 | 24.929 |
| 2/13/2011 03:06:01 | 22.898 | 2/9/2011 09:15:01 | 24.929 |
| 2/13/2011 03:26:01 | 22.960 | 2/9/2011 09:35:01 | 24.867 |
| 2/13/2011 03:46:01 | 22.960 | 2/9/2011 09:55:01 | 24.867 |
| 2/13/2011 04:06:01 | 23.023 | 2/9/2011 10:15:01 | 24.867 |
| 2/13/2011 04:26:01 | 22.960 | 2/9/2011 10:35:01 | 24.867 |
| 2/13/2011 04:46:01 | 22.960 | 2/9/2011 10:55:01 | 24.867 |
| 2/13/2011 05:06:01 | 22.898 | 2/9/2011 11:15:01 | 24.867 |
| 2/13/2011 05:26:01 | 22.835 | 2/9/2011 11:35:01 | 24.929 |
| 2/13/2011 05:46:01 | 22.773 | 2/9/2011 11:55:01 | 24.929 |
| 2/13/2011 06:06:01 | 22.773 | 2/9/2011 12:15:01 | 24.929 |
| 2/13/2011 06:26:01 | 22.835 | 2/9/2011 12:35:01 | 24.929 |
| 2/13/2011 06:46:01 | 23.148 | 2/9/2011 12:55:01 | 24.992 |
| 2/13/2011 07:06:01 | 23.523 | 2/9/2011 13:15:01 | 24.992 |
| 2/13/2011 07:26:01 | 24.086 | 2/9/2011 13:35:01 | 24.992 |
| 2/13/2011 07:46:01 | 24.273 | 2/9/2011 13:55:01 | 25.054 |
| 2/13/2011 08:06:01 | 24.711 | 2/9/2011 14:15:01 | 25.054 |
| 2/13/2011 08:26:01 | 25.899 | 2/9/2011 14:35:01 | 25.117 |
| 2/13/2011 08:46:01 | 26.211 | 2/9/2011 14:55:01 | 25.117 |
| 2/13/2011 09:06:01 | 26.586 | 2/9/2011 15:15:01 | 25.117 |
| 2/13/2011 09:26:01 | 26.648 | 2/9/2011 15:35:01 | 25.179 |
| 2/13/2011 09:46:01 | 27.398 | 2/9/2011 15:55:01 | 25.179 |
| 2/13/2011 10:06:01 | 28.210 | 2/9/2011 16:15:01 | 25.242 |

|                    |        |                    |        |
|--------------------|--------|--------------------|--------|
| 2/13/2011 10:26:01 | 28.460 | 2/9/2011 16:35:01  | 25.242 |
| 2/13/2011 10:46:01 | 28.772 | 2/9/2011 16:55:01  | 25.304 |
| 2/13/2011 11:06:01 | 29.210 | 2/9/2011 17:15:01  | 25.304 |
| 2/13/2011 11:26:01 | 29.459 | 2/9/2011 17:35:01  | 25.304 |
| 2/13/2011 11:46:01 | 29.459 | 2/9/2011 17:55:01  | 25.367 |
| 2/13/2011 12:06:01 | 29.522 | 2/9/2011 18:15:01  | 25.367 |
| 2/13/2011 12:26:01 | 29.584 | 2/9/2011 18:35:01  | 25.367 |
| 2/13/2011 12:46:01 | 29.896 | 2/9/2011 18:55:01  | 25.429 |
| 2/13/2011 13:06:01 | 29.522 | 2/9/2011 19:15:01  | 25.429 |
| 2/13/2011 13:26:01 | 29.896 | 2/9/2011 19:35:01  | 25.429 |
| 2/13/2011 13:46:01 | 31.208 | 2/9/2011 19:55:01  | 25.429 |
| 2/13/2011 14:06:01 | 31.457 | 2/9/2011 20:15:01  | 25.429 |
| 2/13/2011 14:26:01 | 31.645 | 2/9/2011 20:35:01  | 25.429 |
| 2/13/2011 14:46:01 | 31.769 | 2/9/2011 20:55:01  | 25.429 |
| 2/13/2011 15:06:01 | 31.270 | 2/9/2011 21:15:01  | 25.492 |
| 2/13/2011 15:26:01 | 31.083 | 2/9/2011 21:35:01  | 25.492 |
| 2/13/2011 15:46:01 | 30.833 | 2/9/2011 21:55:01  | 25.492 |
| 2/13/2011 16:06:01 | 30.209 | 2/9/2011 22:15:01  | 25.492 |
| 2/13/2011 16:26:01 | 29.896 | 2/9/2011 22:35:01  | 25.492 |
| 2/13/2011 16:46:01 | 29.772 | 2/9/2011 22:55:01  | 25.492 |
| 2/13/2011 17:06:01 | 30.084 | 2/9/2011 23:15:01  | 25.492 |
| 2/13/2011 17:26:01 | 29.896 | 2/9/2011 23:35:01  | 25.492 |
| 2/13/2011 17:46:01 | 28.897 | 2/9/2011 23:55:01  | 25.429 |
| 2/13/2011 18:06:01 | 27.648 | 2/10/2011 00:15:01 | 25.429 |
| 2/13/2011 18:26:01 | 24.273 | 2/10/2011 00:35:01 | 25.429 |
| 2/13/2011 18:46:01 | 23.523 | 2/10/2011 00:55:01 | 25.429 |
| 2/13/2011 19:06:01 | 23.461 | 2/10/2011 01:15:01 | 25.429 |
| 2/13/2011 19:26:01 | 23.398 | 2/10/2011 01:35:01 | 25.429 |
| 2/13/2011 19:46:01 | 23.398 | 2/10/2011 01:55:01 | 25.429 |
| 2/13/2011 20:06:01 | 23.336 | 2/10/2011 02:15:01 | 25.367 |
| 2/13/2011 20:26:01 | 23.273 | 2/10/2011 02:35:01 | 25.367 |
| 2/13/2011 20:46:01 | 23.273 | 2/10/2011 02:55:01 | 25.367 |
| 2/13/2011 21:06:01 | 23.398 | 2/10/2011 03:15:01 | 25.367 |
| 2/13/2011 21:26:01 | 23.273 | 2/10/2011 03:35:01 | 25.367 |
| 2/13/2011 21:46:01 | 23.398 | 2/10/2011 03:55:01 | 25.367 |
| 2/13/2011 22:06:01 | 23.461 | 2/10/2011 04:15:01 | 25.304 |
| 2/13/2011 22:26:01 | 23.586 | 2/10/2011 04:35:01 | 25.304 |
| 2/13/2011 22:46:01 | 23.648 | 2/10/2011 04:55:01 | 25.304 |
| 2/13/2011 23:06:01 | 23.773 | 2/10/2011 05:15:01 | 25.304 |
| 2/13/2011 23:26:01 | 23.836 | 2/10/2011 05:35:01 | 25.242 |
| 2/13/2011 23:46:01 | 23.773 | 2/10/2011 05:55:01 | 25.242 |
| 2/14/2011 00:06:01 | 23.836 | 2/10/2011 06:15:01 | 25.242 |
| 2/14/2011 00:26:01 | 23.836 | 2/10/2011 06:35:01 | 25.242 |
| 2/14/2011 00:46:01 | 23.648 | 2/10/2011 06:55:01 | 25.179 |
| 2/14/2011 01:06:01 | 23.523 | 2/10/2011 07:15:01 | 25.179 |
| 2/14/2011 01:26:01 | 23.586 | 2/10/2011 07:35:01 | 25.179 |
| 2/14/2011 01:46:01 | 23.648 | 2/10/2011 07:55:01 | 25.179 |
| 2/14/2011 02:06:01 | 23.586 | 2/10/2011 08:15:01 | 25.117 |
| 2/14/2011 02:26:01 | 23.586 | 2/10/2011 08:35:01 | 25.117 |
| 2/14/2011 02:46:01 | 23.523 | 2/10/2011 08:55:01 | 25.117 |

|                    |        |                    |        |
|--------------------|--------|--------------------|--------|
| 2/14/2011 03:06:01 | 23.461 | 2/10/2011 09:15:01 | 25.117 |
| 2/14/2011 03:26:01 | 23.523 | 2/10/2011 09:35:01 | 25.117 |
| 2/14/2011 03:46:01 | 23.586 | 2/10/2011 09:55:01 | 25.117 |
| 2/14/2011 04:06:01 | 23.648 | 2/10/2011 10:15:01 | 25.117 |
| 2/14/2011 04:26:01 | 23.586 | 2/10/2011 10:35:01 | 25.117 |
| 2/14/2011 04:46:01 | 23.648 | 2/10/2011 10:55:01 | 25.054 |
| 2/14/2011 05:06:01 | 23.648 | 2/10/2011 11:15:01 | 25.117 |
| 2/14/2011 05:26:01 | 23.586 | 2/10/2011 11:35:01 | 25.117 |
| 2/14/2011 05:46:01 | 23.648 | 2/10/2011 11:55:01 | 25.117 |
| 2/14/2011 06:06:01 | 23.711 | 2/10/2011 12:15:01 | 25.117 |
| 2/14/2011 06:26:01 | 23.773 | 2/10/2011 12:35:01 | 25.117 |
| 2/14/2011 06:46:01 | 23.961 | 2/10/2011 12:55:01 | 25.179 |
| 2/14/2011 07:06:01 | 24.211 | 2/10/2011 13:15:01 | 25.179 |
| 2/14/2011 07:26:01 | 24.398 | 2/10/2011 13:35:01 | 25.242 |
| 2/14/2011 07:46:01 | 24.586 | 2/10/2011 13:55:01 | 25.242 |
| 2/14/2011 08:06:01 | 24.711 | 2/10/2011 14:15:01 | 25.242 |
| 2/14/2011 08:26:01 | 24.774 | 2/10/2011 14:35:01 | 25.304 |
| 2/14/2011 08:46:01 | 24.961 | 2/10/2011 14:55:01 | 25.304 |
| 2/14/2011 09:06:01 | 24.586 | 2/10/2011 15:15:01 | 25.304 |
| 2/14/2011 09:26:01 | 24.336 | 2/10/2011 15:35:01 | 25.367 |
| 2/14/2011 09:46:01 | 24.398 | 2/10/2011 15:55:01 | 25.367 |
| 2/14/2011 10:06:01 | 24.273 | 2/10/2011 16:15:01 | 25.429 |
| 2/14/2011 10:26:01 | 24.086 | 2/10/2011 16:35:01 | 25.429 |
| 2/14/2011 10:46:01 | 23.898 | 2/10/2011 16:55:01 | 25.492 |
| 2/14/2011 11:06:01 | 23.898 | 2/10/2011 17:15:01 | 25.492 |
| 2/14/2011 11:26:01 | 23.773 | 2/10/2011 17:35:01 | 25.492 |
| 2/14/2011 11:46:01 | 23.773 | 2/10/2011 17:55:01 | 25.554 |
| 2/14/2011 12:06:01 | 23.773 | 2/10/2011 18:15:01 | 25.554 |
| 2/14/2011 12:26:01 | 23.648 | 2/10/2011 18:35:01 | 25.554 |
| 2/14/2011 12:46:01 | 23.586 | 2/10/2011 18:55:01 | 25.554 |
| 2/14/2011 13:06:01 | 23.586 | 2/10/2011 19:15:01 | 25.617 |
| 2/14/2011 13:26:01 | 23.461 | 2/10/2011 19:35:01 | 25.617 |
| 2/14/2011 13:46:01 | 23.398 | 2/10/2011 19:55:01 | 25.617 |
| 2/14/2011 14:06:01 | 23.398 | 2/10/2011 20:15:01 | 25.617 |
| 2/14/2011 14:26:01 | 23.211 | 2/10/2011 20:35:01 | 25.679 |
| 2/14/2011 14:46:01 | 23.023 | 2/10/2011 20:55:01 | 25.679 |
| 2/14/2011 15:06:01 | 22.835 | 2/10/2011 21:15:01 | 25.679 |
| 2/14/2011 15:26:01 | 22.960 | 2/10/2011 21:35:01 | 25.679 |
| 2/14/2011 15:46:01 | 22.835 | 2/10/2011 21:55:01 | 25.679 |
| 2/14/2011 16:06:01 | 22.710 | 2/10/2011 22:15:01 | 25.679 |
| 2/14/2011 16:26:01 | 22.710 | 2/10/2011 22:35:01 | 25.679 |
| 2/14/2011 16:46:01 | 22.710 | 2/10/2011 22:55:01 | 25.679 |
| 2/14/2011 17:06:01 | 22.773 | 2/10/2011 23:15:01 | 25.679 |
| 2/14/2011 17:26:01 | 22.835 | 2/10/2011 23:35:01 | 25.679 |
| 2/14/2011 17:46:01 | 22.960 | 2/10/2011 23:55:01 | 25.679 |
| 2/14/2011 18:06:01 | 22.960 | 2/11/2011 00:15:01 | 25.617 |
| 2/14/2011 18:26:01 | 22.960 | 2/11/2011 00:35:01 | 25.617 |
| 2/14/2011 18:46:01 | 22.960 | 2/11/2011 00:55:01 | 25.617 |
| 2/14/2011 19:06:01 | 22.960 | 2/11/2011 01:15:01 | 25.617 |
| 2/14/2011 19:26:01 | 22.960 | 2/11/2011 01:35:01 | 25.617 |

|                    |        |                    |        |
|--------------------|--------|--------------------|--------|
| 2/14/2011 19:46:01 | 22.960 | 2/11/2011 01:55:01 | 25.617 |
| 2/14/2011 20:06:01 | 22.835 | 2/11/2011 02:15:01 | 25.617 |
| 2/14/2011 20:26:01 | 22.773 | 2/11/2011 02:35:01 | 25.554 |
| 2/14/2011 20:46:01 | 22.773 | 2/11/2011 02:55:01 | 25.554 |
| 2/14/2011 21:06:01 | 22.835 | 2/11/2011 03:15:01 | 25.554 |
| 2/14/2011 21:26:01 | 22.835 | 2/11/2011 03:35:01 | 25.554 |
| 2/14/2011 21:46:01 | 22.898 | 2/11/2011 03:55:01 | 25.554 |
| 2/14/2011 22:06:01 | 22.960 | 2/11/2011 04:15:01 | 25.492 |
| 2/14/2011 22:26:01 | 23.023 | 2/11/2011 04:35:01 | 25.492 |
| 2/14/2011 22:46:01 | 23.086 | 2/11/2011 04:55:01 | 25.492 |
| 2/14/2011 23:06:01 | 23.148 | 2/11/2011 05:15:01 | 25.492 |
| 2/14/2011 23:26:01 | 23.148 | 2/11/2011 05:35:01 | 25.429 |
| 2/14/2011 23:46:01 | 23.211 | 2/11/2011 05:55:01 | 25.429 |
| 2/15/2011 00:06:01 | 23.211 | 2/11/2011 06:15:01 | 25.429 |
| 2/15/2011 00:26:01 | 23.211 | 2/11/2011 06:35:01 | 25.429 |
| 2/15/2011 00:46:01 | 23.273 | 2/11/2011 06:55:01 | 25.367 |
| 2/15/2011 01:06:01 | 23.273 | 2/11/2011 07:15:01 | 25.367 |
| 2/15/2011 01:26:01 | 23.273 | 2/11/2011 07:35:01 | 25.367 |
| 2/15/2011 01:46:01 | 23.273 | 2/11/2011 07:55:01 | 25.367 |
| 2/15/2011 02:06:01 | 23.273 | 2/11/2011 08:15:01 | 25.304 |
| 2/15/2011 02:26:01 | 23.273 | 2/11/2011 08:35:01 | 25.304 |
| 2/15/2011 02:46:01 | 23.273 | 2/11/2011 08:55:01 | 25.304 |
| 2/15/2011 03:06:01 | 23.211 | 2/11/2011 09:15:01 | 25.304 |
| 2/15/2011 03:26:01 | 23.211 | 2/11/2011 09:35:01 | 25.304 |
| 2/15/2011 03:46:01 | 23.211 | 2/11/2011 09:55:01 | 25.242 |
| 2/15/2011 04:06:01 | 23.148 | 2/11/2011 10:15:01 | 25.242 |
| 2/15/2011 04:26:01 | 23.148 | 2/11/2011 10:35:01 | 25.242 |
| 2/15/2011 04:46:01 | 23.211 | 2/11/2011 10:55:01 | 25.242 |
| 2/15/2011 05:06:01 | 23.336 | 2/11/2011 11:15:01 | 25.242 |
| 2/15/2011 05:26:01 | 23.336 | 2/11/2011 11:35:01 | 25.242 |
| 2/15/2011 05:46:01 | 23.398 | 2/11/2011 11:55:01 | 25.242 |
| 2/15/2011 06:06:01 | 23.398 | 2/11/2011 12:15:01 | 25.304 |
| 2/15/2011 06:26:01 | 23.586 | 2/11/2011 12:35:01 | 25.304 |
| 2/15/2011 06:46:01 | 23.836 | 2/11/2011 12:55:01 | 25.304 |
| 2/15/2011 07:06:01 | 23.711 | 2/11/2011 13:15:01 | 25.367 |
| 2/15/2011 07:26:01 | 23.898 | 2/11/2011 13:35:01 | 25.367 |
| 2/15/2011 07:46:01 | 23.961 | 2/11/2011 13:55:01 | 25.367 |
| 2/15/2011 08:06:01 | 23.961 | 2/11/2011 14:15:01 | 25.429 |
| 2/15/2011 08:26:01 | 24.086 | 2/11/2011 14:35:01 | 25.429 |
| 2/15/2011 08:46:01 | 24.398 | 2/11/2011 14:55:01 | 25.429 |
| 2/15/2011 09:06:01 | 24.336 | 2/11/2011 15:15:01 | 25.492 |
| 2/15/2011 09:26:01 | 24.461 | 2/11/2011 15:35:01 | 25.492 |
| 2/15/2011 09:46:01 | 24.398 | 2/11/2011 15:55:01 | 25.492 |
| 2/15/2011 10:06:01 | 24.398 | 2/11/2011 16:15:01 | 25.554 |
| 2/15/2011 10:26:01 | 24.774 | 2/11/2011 16:35:01 | 25.554 |
| 2/15/2011 10:46:01 | 25.086 | 2/11/2011 16:55:01 | 25.554 |
| 2/15/2011 11:06:01 | 25.336 | 2/11/2011 17:15:01 | 25.617 |
| 2/15/2011 11:26:01 | 25.336 | 2/11/2011 17:35:01 | 25.617 |
| 2/15/2011 11:46:01 | 24.586 | 2/11/2011 17:55:01 | 25.617 |
| 2/15/2011 12:06:01 | 25.524 | 2/11/2011 18:15:01 | 25.679 |

|                    |        |                    |        |
|--------------------|--------|--------------------|--------|
| 2/15/2011 12:26:01 | 26.523 | 2/11/2011 18:35:01 | 25.679 |
| 2/15/2011 12:46:01 | 26.773 | 2/11/2011 18:55:01 | 25.679 |
| 2/15/2011 13:06:01 | 26.086 | 2/11/2011 19:15:01 | 25.679 |
| 2/15/2011 13:26:01 | 25.524 | 2/11/2011 19:35:01 | 25.742 |
| 2/15/2011 13:46:01 | 25.024 | 2/11/2011 19:55:01 | 25.742 |
| 2/15/2011 14:06:01 | 25.149 | 2/11/2011 20:15:01 | 25.742 |
| 2/15/2011 14:26:01 | 23.586 | 2/11/2011 20:35:01 | 25.742 |
| 2/15/2011 14:46:01 | 24.086 | 2/11/2011 20:55:01 | 25.742 |
| 2/15/2011 15:06:01 | 25.086 | 2/11/2011 21:15:01 | 25.742 |
| 2/15/2011 15:26:01 | 25.336 | 2/11/2011 21:35:01 | 25.742 |
| 2/15/2011 15:46:01 | 24.836 | 2/11/2011 21:55:01 | 25.742 |
| 2/15/2011 16:06:01 | 24.336 | 2/11/2011 22:15:01 | 25.742 |
| 2/15/2011 16:26:01 | 24.211 | 2/11/2011 22:35:01 | 25.742 |
| 2/15/2011 16:46:01 | 24.273 | 2/11/2011 22:55:01 | 25.742 |
| 2/15/2011 17:06:01 | 24.398 | 2/11/2011 23:15:01 | 25.742 |
| 2/15/2011 17:26:01 | 24.523 | 2/11/2011 23:35:01 | 25.742 |
| 2/15/2011 17:46:01 | 24.523 | 2/11/2011 23:55:01 | 25.742 |
| 2/15/2011 18:06:01 | 24.586 | 2/12/2011 00:15:01 | 25.742 |
| 2/15/2011 18:26:01 | 24.398 | 2/12/2011 00:35:01 | 25.742 |
| 2/15/2011 18:46:01 | 23.836 | 2/12/2011 00:55:01 | 25.742 |
| 2/15/2011 19:06:01 | 24.211 | 2/12/2011 01:15:01 | 25.742 |
| 2/15/2011 19:26:01 | 24.336 | 2/12/2011 01:35:01 | 25.679 |
| 2/15/2011 19:46:01 | 24.211 | 2/12/2011 01:55:01 | 25.679 |
| 2/15/2011 20:06:01 | 24.086 | 2/12/2011 02:15:01 | 25.679 |
| 2/15/2011 20:26:01 | 24.086 | 2/12/2011 02:35:01 | 25.679 |
| 2/15/2011 20:46:01 | 24.086 | 2/12/2011 02:55:01 | 25.617 |
| 2/15/2011 21:06:01 | 23.898 | 2/12/2011 03:15:01 | 25.617 |
| 2/15/2011 21:26:01 | 23.773 | 2/12/2011 03:35:01 | 25.617 |
| 2/15/2011 21:46:01 | 23.836 | 2/12/2011 03:55:01 | 25.617 |
| 2/15/2011 22:06:01 | 24.023 | 2/12/2011 04:15:01 | 25.554 |
| 2/15/2011 22:26:01 | 24.211 | 2/12/2011 04:35:01 | 25.554 |
| 2/15/2011 22:46:01 | 24.211 | 2/12/2011 04:55:01 | 25.554 |
| 2/15/2011 23:06:01 | 23.961 | 2/12/2011 05:15:01 | 25.554 |
| 2/15/2011 23:26:01 | 23.586 | 2/12/2011 05:35:01 | 25.492 |
| 2/15/2011 23:46:01 | 23.461 | 2/12/2011 05:55:01 | 25.492 |
| 2/16/2011 00:06:01 | 23.523 | 2/12/2011 06:15:01 | 25.492 |
| 2/16/2011 00:26:01 | 23.648 | 2/12/2011 06:35:01 | 25.492 |
| 2/16/2011 00:46:01 | 23.711 | 2/12/2011 06:55:01 | 25.429 |
| 2/16/2011 01:06:01 | 23.836 | 2/12/2011 07:15:01 | 25.429 |
| 2/16/2011 01:26:01 | 23.648 | 2/12/2011 07:35:01 | 25.429 |
| 2/16/2011 01:46:01 | 23.273 | 2/12/2011 07:55:01 | 25.429 |
| 2/16/2011 02:06:01 | 23.211 | 2/12/2011 08:15:01 | 25.367 |
| 2/16/2011 02:26:01 | 23.336 | 2/12/2011 08:35:01 | 25.367 |
| 2/16/2011 02:46:01 | 23.461 | 2/12/2011 08:55:01 | 25.367 |
| 2/16/2011 03:06:01 | 23.461 | 2/12/2011 09:15:01 | 25.367 |
| 2/16/2011 03:26:01 | 23.273 | 2/12/2011 09:35:01 | 25.367 |
| 2/16/2011 03:46:01 | 23.086 | 2/12/2011 09:55:01 | 25.367 |
| 2/16/2011 04:06:01 | 23.023 | 2/12/2011 10:15:01 | 25.367 |
| 2/16/2011 04:26:01 | 23.086 | 2/12/2011 10:35:01 | 25.367 |
| 2/16/2011 04:46:01 | 23.148 | 2/12/2011 10:55:01 | 25.367 |

|                    |        |                    |        |
|--------------------|--------|--------------------|--------|
| 2/16/2011 05:06:01 | 23.273 | 2/12/2011 11:15:01 | 25.367 |
| 2/16/2011 05:26:01 | 23.336 | 2/12/2011 11:35:01 | 25.367 |
| 2/16/2011 05:46:01 | 23.398 | 2/12/2011 11:55:01 | 25.367 |
| 2/16/2011 06:06:01 | 23.398 | 2/12/2011 12:15:01 | 25.367 |
| 2/16/2011 06:26:01 | 23.461 | 2/12/2011 12:35:01 | 25.429 |
| 2/16/2011 06:46:01 | 23.586 | 2/12/2011 12:55:01 | 25.429 |
| 2/16/2011 07:06:01 | 23.586 | 2/12/2011 13:15:01 | 25.492 |
| 2/16/2011 07:26:01 | 23.398 | 2/12/2011 13:35:01 | 25.492 |
| 2/16/2011 07:46:01 | 23.086 | 2/12/2011 13:55:01 | 25.492 |
| 2/16/2011 08:06:01 | 22.960 | 2/12/2011 14:15:01 | 25.554 |
| 2/16/2011 08:26:01 | 22.960 | 2/12/2011 14:35:01 | 25.554 |
| 2/16/2011 08:46:01 | 23.023 | 2/12/2011 14:55:01 | 25.617 |
| 2/16/2011 09:06:01 | 23.023 | 2/12/2011 15:15:01 | 25.617 |
| 2/16/2011 09:26:01 | 23.086 | 2/12/2011 15:35:01 | 25.617 |
| 2/16/2011 09:46:01 | 23.336 | 2/12/2011 15:55:01 | 25.679 |
| 2/16/2011 10:06:01 | 23.648 | 2/12/2011 16:15:01 | 25.679 |
| 2/16/2011 10:26:01 | 23.836 | 2/12/2011 16:35:01 | 25.679 |
| 2/16/2011 10:46:01 | 24.023 | 2/12/2011 16:55:01 | 25.742 |
| 2/16/2011 11:06:01 | 24.211 | 2/12/2011 17:15:01 | 25.742 |
| 2/16/2011 11:26:01 | 24.211 | 2/12/2011 17:35:01 | 25.742 |
| 2/16/2011 11:46:01 | 24.398 | 2/12/2011 17:55:01 | 25.742 |
| 2/16/2011 12:06:01 | 24.774 | 2/12/2011 18:15:01 | 25.804 |
| 2/16/2011 12:26:01 | 25.336 | 2/12/2011 18:35:01 | 25.804 |
| 2/16/2011 12:46:01 | 25.899 | 2/12/2011 18:55:01 | 25.804 |
| 2/16/2011 13:06:01 | 25.461 | 2/12/2011 19:15:01 | 25.804 |
| 2/16/2011 13:26:01 | 25.274 | 2/12/2011 19:35:01 | 25.804 |
| 2/16/2011 13:46:01 | 25.399 | 2/12/2011 19:55:01 | 25.867 |
| 2/16/2011 14:06:01 | 25.336 | 2/12/2011 20:15:01 | 25.867 |
| 2/16/2011 14:26:01 | 25.461 | 2/12/2011 20:35:01 | 25.867 |
| 2/16/2011 14:46:01 | 25.149 | 2/12/2011 20:55:01 | 25.867 |
| 2/16/2011 15:06:01 | 24.523 | 2/12/2011 21:15:01 | 25.867 |
| 2/16/2011 15:26:01 | 24.273 | 2/12/2011 21:35:01 | 25.867 |
| 2/16/2011 15:46:01 | 24.148 | 2/12/2011 21:55:01 | 25.867 |
| 2/16/2011 16:06:01 | 24.336 | 2/12/2011 22:15:01 | 25.867 |
| 2/16/2011 16:26:01 | 24.648 | 2/12/2011 22:35:01 | 25.867 |
| 2/16/2011 16:46:01 | 24.774 | 2/12/2011 22:55:01 | 25.867 |
| 2/16/2011 17:06:01 | 24.711 | 2/12/2011 23:15:01 | 25.804 |
| 2/16/2011 17:26:01 | 24.586 | 2/12/2011 23:35:01 | 25.742 |
| 2/16/2011 17:46:01 | 24.523 | 2/12/2011 23:55:01 | 25.679 |
| 2/16/2011 18:06:01 | 24.461 | 2/13/2011 00:15:01 | 25.617 |
| 2/16/2011 18:26:01 | 24.398 | 2/13/2011 00:35:01 | 25.554 |
| 2/16/2011 18:46:01 | 24.336 | 2/13/2011 00:55:01 | 25.492 |
| 2/16/2011 19:06:01 | 24.336 | 2/13/2011 01:15:01 | 25.429 |
| 2/16/2011 19:26:01 | 24.336 | 2/13/2011 01:35:01 | 25.429 |
| 2/16/2011 19:46:01 | 24.336 | 2/13/2011 01:55:01 | 25.367 |
| 2/16/2011 20:06:01 | 24.336 | 2/13/2011 02:15:01 | 25.367 |
| 2/16/2011 20:26:01 | 24.273 | 2/13/2011 02:35:01 | 25.304 |
| 2/16/2011 20:46:01 | 24.273 | 2/13/2011 02:55:01 | 25.304 |
| 2/16/2011 21:06:01 | 24.273 | 2/13/2011 03:15:01 | 25.242 |
| 2/16/2011 21:26:01 | 24.273 | 2/13/2011 03:35:01 | 25.242 |



|                    |        |                    |        |
|--------------------|--------|--------------------|--------|
| 2/16/2011 21:46:01 | 24.398 | 2/13/2011 03:55:01 | 25.242 |
| 2/16/2011 22:06:01 | 24.461 | 2/13/2011 04:15:01 | 25.179 |
| 2/16/2011 22:26:01 | 24.461 | 2/13/2011 04:35:01 | 25.179 |
| 2/16/2011 22:46:01 | 24.523 | 2/13/2011 04:55:01 | 25.179 |
| 2/16/2011 23:06:01 | 24.586 | 2/13/2011 05:15:01 | 25.117 |
| 2/16/2011 23:26:01 | 24.648 | 2/13/2011 05:35:01 | 25.117 |
| 2/16/2011 23:46:01 | 24.648 | 2/13/2011 05:55:01 | 25.117 |
| 2/17/2011 00:06:01 | 24.711 | 2/13/2011 06:15:01 | 25.117 |
| 2/17/2011 00:26:01 | 24.711 | 2/13/2011 06:35:01 | 25.054 |
| 2/17/2011 00:46:01 | 24.711 | 2/13/2011 06:55:01 | 25.054 |
| 2/17/2011 01:06:01 | 24.648 | 2/13/2011 07:15:01 | 25.054 |
| 2/17/2011 01:26:01 | 24.648 | 2/13/2011 07:35:01 | 25.054 |
| 2/17/2011 01:46:01 | 24.648 | 2/13/2011 07:55:01 | 25.054 |
| 2/17/2011 02:06:01 | 24.523 | 2/13/2011 08:15:01 | 24.992 |
| 2/17/2011 02:26:01 | 24.523 | 2/13/2011 08:35:01 | 24.992 |
| 2/17/2011 02:46:01 | 24.523 | 2/13/2011 08:55:01 | 24.992 |
| 2/17/2011 03:06:01 | 24.086 | 2/13/2011 09:15:01 | 24.992 |
| 2/17/2011 03:26:01 | 24.148 | 2/13/2011 09:35:01 | 24.992 |
| 2/17/2011 03:46:01 | 24.336 | 2/13/2011 09:55:01 | 24.992 |
| 2/17/2011 04:06:01 | 24.398 | 2/13/2011 10:15:01 | 24.992 |
| 2/17/2011 04:26:01 | 24.461 | 2/13/2011 10:35:01 | 24.992 |
| 2/17/2011 04:46:01 | 24.461 | 2/13/2011 10:55:01 | 24.992 |
| 2/17/2011 05:06:01 | 24.461 | 2/13/2011 11:15:01 | 24.992 |
| 2/17/2011 05:26:01 | 24.461 | 2/13/2011 11:35:01 | 24.992 |
| 2/17/2011 05:46:01 | 24.586 | 2/13/2011 11:55:01 | 24.992 |
| 2/17/2011 06:06:01 | 24.711 | 2/13/2011 12:15:01 | 24.992 |
| 2/17/2011 06:26:01 | 24.836 | 2/13/2011 12:35:01 | 25.054 |
| 2/17/2011 06:46:01 | 25.149 | 2/13/2011 12:55:01 | 25.054 |
| 2/17/2011 07:06:01 | 25.149 | 2/13/2011 13:15:01 | 25.117 |
| 2/17/2011 07:26:01 | 24.961 | 2/13/2011 13:35:01 | 25.117 |
| 2/17/2011 07:46:01 | 25.649 | 2/13/2011 13:55:01 | 25.117 |
| 2/17/2011 08:06:01 | 24.899 | 2/13/2011 14:15:01 | 25.179 |
| 2/17/2011 08:26:01 | 24.086 | 2/13/2011 14:35:01 | 25.179 |
| 2/17/2011 08:46:01 | 24.398 | 2/13/2011 14:55:01 | 25.242 |
| 2/17/2011 09:06:01 | 24.899 | 2/13/2011 15:15:01 | 25.242 |
| 2/17/2011 09:26:01 | 25.336 | 2/13/2011 15:35:01 | 25.242 |
| 2/17/2011 09:46:01 | 24.711 | 2/13/2011 15:55:01 | 25.242 |
| 2/17/2011 10:06:01 | 24.211 | 2/13/2011 16:15:01 | 25.304 |
| 2/17/2011 10:26:01 | 24.148 | 2/13/2011 16:35:01 | 25.304 |
| 2/17/2011 10:46:01 | 24.148 | 2/13/2011 16:55:01 | 25.367 |
| 2/17/2011 11:06:01 | 24.336 | 2/13/2011 17:15:01 | 25.367 |
| 2/17/2011 11:26:01 | 24.523 | 2/13/2011 17:35:01 | 25.367 |
| 2/17/2011 11:46:01 | 24.586 | 2/13/2011 17:55:01 | 25.367 |
| 2/17/2011 12:06:01 | 25.024 | 2/13/2011 18:15:01 | 25.429 |
| 2/17/2011 12:26:01 | 25.961 | 2/13/2011 18:35:01 | 25.429 |
| 2/17/2011 12:46:01 | 26.461 | 2/13/2011 18:55:01 | 25.429 |
| 2/17/2011 13:06:01 | 26.836 | 2/13/2011 19:15:01 | 25.492 |
| 2/17/2011 13:26:01 | 26.523 | 2/13/2011 19:35:01 | 25.492 |
| 2/17/2011 13:46:01 | 26.711 | 2/13/2011 19:55:01 | 25.492 |
| 2/17/2011 14:06:01 | 27.023 | 2/13/2011 20:15:01 | 25.492 |

|                    |        |                    |        |
|--------------------|--------|--------------------|--------|
| 2/17/2011 14:26:01 | 26.086 | 2/13/2011 20:35:01 | 25.492 |
| 2/17/2011 14:46:01 | 25.274 | 2/13/2011 20:55:01 | 25.492 |
| 2/17/2011 15:06:01 | 25.211 | 2/13/2011 21:15:01 | 25.492 |
| 2/17/2011 15:26:01 | 24.836 | 2/13/2011 21:35:01 | 25.492 |
| 2/17/2011 15:46:01 | 23.961 | 2/13/2011 21:55:01 | 25.429 |
| 2/17/2011 16:06:01 | 23.523 | 2/13/2011 22:15:01 | 25.429 |
| 2/17/2011 16:26:01 | 23.586 | 2/13/2011 22:35:01 | 25.429 |
| 2/17/2011 16:46:01 | 23.773 | 2/13/2011 22:55:01 | 25.429 |
| 2/17/2011 17:06:01 | 23.711 | 2/13/2011 23:15:01 | 25.429 |
| 2/17/2011 17:26:01 | 23.711 | 2/13/2011 23:35:01 | 25.367 |
| 2/17/2011 17:46:01 | 23.836 | 2/13/2011 23:55:01 | 25.367 |
| 2/17/2011 18:06:01 | 24.086 | 2/14/2011 00:15:01 | 25.367 |
| 2/17/2011 18:26:01 | 23.773 | 2/14/2011 00:35:01 | 25.367 |
| 2/17/2011 18:46:01 | 23.711 | 2/14/2011 00:55:01 | 25.367 |
| 2/17/2011 19:06:01 | 23.773 | 2/14/2011 01:15:01 | 25.304 |
| 2/17/2011 19:26:01 | 23.836 | 2/14/2011 01:35:01 | 25.304 |
| 2/17/2011 19:46:01 | 23.836 | 2/14/2011 01:55:01 | 25.304 |
| 2/17/2011 20:06:01 | 23.898 | 2/14/2011 02:15:01 | 25.304 |
| 2/17/2011 20:26:01 | 24.023 | 2/14/2011 02:35:01 | 25.304 |
| 2/17/2011 20:46:01 | 24.086 | 2/14/2011 02:55:01 | 25.242 |
| 2/17/2011 21:06:01 | 24.148 | 2/14/2011 03:15:01 | 25.242 |
| 2/17/2011 21:26:01 | 24.211 | 2/14/2011 03:35:01 | 25.242 |
| 2/17/2011 21:46:01 | 24.336 | 2/14/2011 03:55:01 | 25.242 |
| 2/17/2011 22:06:01 | 24.461 | 2/14/2011 04:15:01 | 25.242 |
| 2/17/2011 22:26:01 | 24.523 | 2/14/2011 04:35:01 | 25.179 |
| 2/17/2011 22:46:01 | 24.586 | 2/14/2011 04:55:01 | 25.179 |
| 2/17/2011 23:06:01 | 24.523 | 2/14/2011 05:15:01 | 25.179 |
| 2/17/2011 23:26:01 | 24.461 | 2/14/2011 05:35:01 | 25.179 |
| 2/17/2011 23:46:01 | 24.523 | 2/14/2011 05:55:01 | 25.179 |
| 2/18/2011 00:06:01 | 24.648 | 2/14/2011 06:15:01 | 25.179 |
| 2/18/2011 00:26:01 | 24.774 | 2/14/2011 06:35:01 | 25.117 |
| 2/18/2011 00:46:01 | 24.899 | 2/14/2011 06:55:01 | 25.117 |
| 2/18/2011 01:06:01 | 24.961 | 2/14/2011 07:15:01 | 25.117 |
| 2/18/2011 01:26:01 | 25.024 | 2/14/2011 07:35:01 | 25.117 |
| 2/18/2011 01:46:01 | 25.086 | 2/14/2011 07:55:01 | 25.117 |
| 2/18/2011 02:06:01 | 25.149 | 2/14/2011 08:15:01 | 25.117 |
| 2/18/2011 02:26:01 | 25.149 | 2/14/2011 08:35:01 | 25.054 |
| 2/18/2011 02:46:01 | 25.086 | 2/14/2011 08:55:01 | 25.054 |
| 2/18/2011 03:06:01 | 25.086 | 2/14/2011 09:15:01 | 25.054 |
| 2/18/2011 03:26:01 | 25.086 | 2/14/2011 09:35:01 | 25.054 |
| 2/18/2011 03:46:01 | 25.149 | 2/14/2011 09:55:01 | 25.054 |
| 2/18/2011 04:06:01 | 25.149 | 2/14/2011 10:15:01 | 25.054 |
| 2/18/2011 04:26:01 | 25.211 | 2/14/2011 10:35:01 | 25.054 |
| 2/18/2011 04:46:01 | 25.149 | 2/14/2011 10:55:01 | 25.054 |
| 2/18/2011 05:06:01 | 25.086 | 2/14/2011 11:15:01 | 25.054 |
| 2/18/2011 05:26:01 | 25.024 | 2/14/2011 11:35:01 | 25.054 |
| 2/18/2011 05:46:01 | 24.961 | 2/14/2011 11:55:01 | 25.054 |
| 2/18/2011 06:06:01 | 24.961 | 2/14/2011 12:15:01 | 25.054 |
| 2/18/2011 06:26:01 | 25.086 | 2/14/2011 12:35:01 | 25.054 |
| 2/18/2011 06:46:01 | 23.023 | 2/14/2011 12:55:01 | 25.054 |

|                    |        |                    |        |
|--------------------|--------|--------------------|--------|
| 2/18/2011 07:06:01 | 22.773 | 2/14/2011 13:15:01 | 24.992 |
| 2/18/2011 07:26:01 | 22.898 | 2/14/2011 13:35:01 | 24.992 |
| 2/18/2011 07:46:01 | 22.960 | 2/14/2011 13:55:01 | 24.992 |
| 2/18/2011 08:06:01 | 23.148 | 2/14/2011 14:15:01 | 24.992 |
| 2/18/2011 08:26:01 | 23.398 | 2/14/2011 14:35:01 | 24.992 |
| 2/18/2011 08:46:01 | 23.711 | 2/14/2011 14:55:01 | 24.992 |
| 2/18/2011 09:06:01 | 24.086 | 2/14/2011 15:15:01 | 24.992 |
| 2/18/2011 09:26:01 | 24.586 | 2/14/2011 15:35:01 | 24.992 |
| 2/18/2011 09:46:01 | 24.774 | 2/14/2011 15:55:01 | 24.992 |
| 2/18/2011 10:06:01 | 24.899 | 2/14/2011 16:15:01 | 24.929 |
| 2/18/2011 10:26:01 | 25.586 | 2/14/2011 16:35:01 | 24.929 |
| 2/18/2011 10:46:01 | 25.836 | 2/14/2011 16:55:01 | 24.929 |
| 2/18/2011 11:06:01 | 25.774 | 2/14/2011 17:15:01 | 24.929 |
| 2/18/2011 11:26:01 | 26.024 | 2/14/2011 17:35:01 | 24.929 |
| 2/18/2011 11:46:01 | 25.649 | 2/14/2011 17:55:01 | 24.867 |
| 2/18/2011 12:06:01 | 24.899 | 2/14/2011 18:15:01 | 24.867 |
| 2/18/2011 12:26:01 | 25.899 | 2/14/2011 18:35:01 | 24.867 |
| 2/18/2011 12:46:01 | 26.523 | 2/14/2011 18:55:01 | 24.867 |
| 2/18/2011 13:06:01 | 26.711 | 2/14/2011 19:15:01 | 24.867 |
| 2/18/2011 13:26:01 | 26.773 | 2/14/2011 19:35:01 | 24.804 |
| 2/18/2011 13:46:01 | 26.336 | 2/14/2011 19:55:01 | 24.804 |
| 2/18/2011 14:06:01 | 26.398 | 2/14/2011 20:15:01 | 24.804 |
| 2/18/2011 14:26:01 | 26.398 | 2/14/2011 20:35:01 | 24.742 |
| 2/18/2011 14:46:01 | 26.461 | 2/14/2011 20:55:01 | 24.742 |
| 2/18/2011 15:06:01 | 26.586 | 2/14/2011 21:15:01 | 24.679 |
| 2/18/2011 15:26:01 | 26.773 | 2/14/2011 21:35:01 | 24.679 |
| 2/18/2011 15:46:01 | 26.398 | 2/14/2011 21:55:01 | 24.679 |
| 2/18/2011 16:06:01 | 26.273 | 2/14/2011 22:15:01 | 24.617 |
| 2/18/2011 16:26:01 | 25.961 | 2/14/2011 22:35:01 | 24.617 |
| 2/18/2011 16:46:01 | 24.836 | 2/14/2011 22:55:01 | 24.617 |
| 2/18/2011 17:06:01 | 24.961 | 2/14/2011 23:15:01 | 24.617 |
| 2/18/2011 17:26:01 | 25.399 | 2/14/2011 23:35:01 | 24.554 |
| 2/18/2011 17:46:01 | 25.586 | 2/14/2011 23:55:01 | 24.554 |
| 2/18/2011 18:06:01 | 25.711 | 2/15/2011 00:15:01 | 24.554 |
| 2/18/2011 18:26:01 | 25.586 | 2/15/2011 00:35:01 | 24.554 |
| 2/18/2011 18:46:01 | 25.524 | 2/15/2011 00:55:01 | 24.492 |
| 2/18/2011 19:06:01 | 25.461 | 2/15/2011 01:15:01 | 24.492 |
| 2/18/2011 19:26:01 | 25.399 | 2/15/2011 01:35:01 | 24.492 |
| 2/18/2011 19:46:01 | 25.399 | 2/15/2011 01:55:01 | 24.492 |
| 2/18/2011 20:06:01 | 25.336 | 2/15/2011 02:15:01 | 24.492 |
| 2/18/2011 20:26:01 | 25.274 | 2/15/2011 02:35:01 | 24.492 |
| 2/18/2011 20:46:01 | 25.211 | 2/15/2011 02:55:01 | 24.492 |
| 2/18/2011 21:06:01 | 25.149 | 2/15/2011 03:15:01 | 24.429 |
| 2/18/2011 21:26:01 | 25.149 | 2/15/2011 03:35:01 | 24.429 |
| 2/18/2011 21:46:01 | 25.149 | 2/15/2011 03:55:01 | 24.429 |
| 2/18/2011 22:06:01 | 25.149 | 2/15/2011 04:15:01 | 24.429 |
| 2/18/2011 22:26:01 | 25.149 | 2/15/2011 04:35:01 | 24.429 |
| 2/18/2011 22:46:01 | 25.149 | 2/15/2011 04:55:01 | 24.429 |
| 2/18/2011 23:06:01 | 25.149 | 2/15/2011 05:15:01 | 24.429 |
| 2/18/2011 23:26:01 | 24.961 | 2/15/2011 05:35:01 | 24.429 |

|                    |        |                    |        |
|--------------------|--------|--------------------|--------|
| 2/18/2011 23:46:01 | 24.648 | 2/15/2011 05:55:01 | 24.429 |
| 2/19/2011 00:06:01 | 24.523 | 2/15/2011 06:15:01 | 24.429 |
| 2/19/2011 00:26:01 | 24.523 | 2/15/2011 06:35:01 | 24.429 |
| 2/19/2011 00:46:01 | 24.523 | 2/15/2011 06:55:01 | 24.367 |
| 2/19/2011 01:06:01 | 24.586 | 2/15/2011 07:15:01 | 24.429 |
| 2/19/2011 01:26:01 | 24.648 | 2/15/2011 07:35:01 | 24.367 |
| 2/19/2011 01:46:01 | 24.711 | 2/15/2011 07:55:01 | 24.429 |
| 2/19/2011 02:06:01 | 24.711 | 2/15/2011 08:15:01 | 24.367 |
| 2/19/2011 02:26:01 | 24.711 | 2/15/2011 08:35:01 | 24.367 |
| 2/19/2011 02:46:01 | 24.711 | 2/15/2011 08:55:01 | 24.367 |
| 2/19/2011 03:06:01 | 24.711 | 2/15/2011 09:15:01 | 24.367 |
| 2/19/2011 03:26:01 | 24.774 | 2/15/2011 09:35:01 | 24.367 |
| 2/19/2011 03:46:01 | 24.711 | 2/15/2011 09:55:01 | 24.367 |
| 2/19/2011 04:06:01 | 24.774 | 2/15/2011 10:15:01 | 24.367 |
| 2/19/2011 04:26:01 | 24.836 | 2/15/2011 10:35:01 | 24.367 |
| 2/19/2011 04:46:01 | 24.836 | 2/15/2011 10:55:01 | 24.367 |
| 2/19/2011 05:06:01 | 24.774 | 2/15/2011 11:15:01 | 24.367 |
| 2/19/2011 05:26:01 | 24.836 | 2/15/2011 11:35:01 | 24.367 |
| 2/19/2011 05:46:01 | 24.774 | 2/15/2011 11:55:01 | 24.367 |
| 2/19/2011 06:06:01 | 24.711 | 2/15/2011 12:15:01 | 24.367 |
| 2/19/2011 06:26:01 | 24.586 | 2/15/2011 12:35:01 | 24.367 |
| 2/19/2011 06:46:01 | 24.648 | 2/15/2011 12:55:01 | 24.367 |
| 2/19/2011 07:06:01 | 24.836 | 2/15/2011 13:15:01 | 24.367 |
| 2/19/2011 07:26:01 | 25.024 | 2/15/2011 13:35:01 | 24.367 |
| 2/19/2011 07:46:01 | 25.336 | 2/15/2011 13:55:01 | 24.367 |
| 2/19/2011 08:06:01 | 25.461 | 2/15/2011 14:15:01 | 24.367 |
| 2/19/2011 08:26:01 | 25.649 | 2/15/2011 14:35:01 | 24.429 |
| 2/19/2011 08:46:01 | 25.711 | 2/15/2011 14:55:01 | 24.429 |
| 2/19/2011 09:06:01 | 25.899 | 2/15/2011 15:15:01 | 24.429 |
| 2/19/2011 09:26:01 | 26.024 | 2/15/2011 15:35:01 | 24.429 |
| 2/19/2011 09:46:01 | 26.148 | 2/15/2011 15:55:01 | 24.429 |
| 2/19/2011 10:06:01 | 26.648 | 2/15/2011 16:15:01 | 24.429 |
| 2/19/2011 10:26:01 | 27.148 | 2/15/2011 16:35:01 | 24.492 |
| 2/19/2011 10:46:01 | 27.773 | 2/15/2011 16:55:01 | 24.492 |
| 2/19/2011 11:06:01 | 27.586 | 2/15/2011 17:15:01 | 24.492 |
| 2/19/2011 11:26:01 | 28.210 | 2/15/2011 17:35:01 | 24.492 |
| 2/19/2011 11:46:01 | 28.085 | 2/15/2011 17:55:01 | 24.492 |
| 2/19/2011 12:06:01 | 28.460 | 2/15/2011 18:15:01 | 24.492 |
| 2/19/2011 12:26:01 | 29.459 | 2/15/2011 18:35:01 | 24.492 |
| 2/19/2011 12:46:01 | 29.272 | 2/15/2011 18:55:01 | 24.492 |
| 2/19/2011 13:06:01 | 29.522 | 2/15/2011 19:15:01 | 24.492 |
| 2/19/2011 13:26:01 | 29.584 | 2/15/2011 19:35:01 | 24.492 |
| 2/19/2011 13:46:01 | 30.084 | 2/15/2011 19:55:01 | 24.492 |
| 2/19/2011 14:06:01 | 29.085 | 2/15/2011 20:15:01 | 24.492 |
| 2/19/2011 14:26:01 | 29.772 | 2/15/2011 20:35:01 | 24.492 |
| 2/19/2011 14:46:01 | 30.021 | 2/15/2011 20:55:01 | 24.492 |
| 2/19/2011 15:06:01 | 29.210 | 2/15/2011 21:15:01 | 24.492 |
| 2/19/2011 15:26:01 | 29.210 | 2/15/2011 21:35:01 | 24.492 |
| 2/19/2011 15:46:01 | 29.085 | 2/15/2011 21:55:01 | 24.492 |
| 2/19/2011 16:06:01 | 28.772 | 2/15/2011 22:15:01 | 24.492 |

|                    |        |                    |        |
|--------------------|--------|--------------------|--------|
| 2/19/2011 16:26:01 | 28.772 | 2/15/2011 22:35:01 | 24.492 |
| 2/19/2011 16:46:01 | 28.398 | 2/15/2011 22:55:01 | 24.492 |
| 2/19/2011 17:06:01 | 28.085 | 2/15/2011 23:15:01 | 24.492 |
| 2/19/2011 17:26:01 | 27.898 | 2/15/2011 23:35:01 | 24.492 |
| 2/19/2011 17:46:01 | 27.523 | 2/15/2011 23:55:01 | 24.492 |
| 2/19/2011 18:06:01 | 27.023 | 2/16/2011 00:15:01 | 24.492 |
| 2/19/2011 18:26:01 | 26.773 | 2/16/2011 00:35:01 | 24.492 |
| 2/19/2011 18:46:01 | 26.523 | 2/16/2011 00:55:01 | 24.492 |
| 2/19/2011 19:06:01 | 26.024 | 2/16/2011 01:15:01 | 24.492 |
| 2/19/2011 19:26:01 | 25.649 | 2/16/2011 01:35:01 | 24.492 |
| 2/19/2011 19:46:01 | 25.461 | 2/16/2011 01:55:01 | 24.429 |
| 2/19/2011 20:06:01 | 25.149 | 2/16/2011 02:15:01 | 24.429 |
| 2/19/2011 20:26:01 | 24.961 | 2/16/2011 02:35:01 | 24.429 |
| 2/19/2011 20:46:01 | 24.899 | 2/16/2011 02:55:01 | 24.429 |
| 2/19/2011 21:06:01 | 24.899 | 2/16/2011 03:15:01 | 24.429 |
| 2/19/2011 21:26:01 | 24.836 | 2/16/2011 03:35:01 | 24.429 |
| 2/19/2011 21:46:01 | 24.711 | 2/16/2011 03:55:01 | 24.429 |
| 2/19/2011 22:06:01 | 24.648 | 2/16/2011 04:15:01 | 24.429 |
| 2/19/2011 22:26:01 | 24.461 | 2/16/2011 04:35:01 | 24.429 |
| 2/19/2011 22:46:01 | 24.336 | 2/16/2011 04:55:01 | 24.367 |
| 2/19/2011 23:06:01 | 24.273 | 2/16/2011 05:15:01 | 24.367 |
| 2/19/2011 23:26:01 | 24.211 | 2/16/2011 05:35:01 | 24.367 |
| 2/19/2011 23:46:01 | 24.211 | 2/16/2011 05:55:01 | 24.367 |
| 2/20/2011 00:06:01 | 24.148 | 2/16/2011 06:15:01 | 24.367 |
| 2/20/2011 00:26:01 | 24.086 | 2/16/2011 06:35:01 | 24.367 |
| 2/20/2011 00:46:01 | 23.898 | 2/16/2011 06:55:01 | 24.367 |
| 2/20/2011 01:06:01 | 23.773 | 2/16/2011 07:15:01 | 24.367 |
| 2/20/2011 01:26:01 | 23.836 | 2/16/2011 07:35:01 | 24.367 |
| 2/20/2011 01:46:01 | 24.023 | 2/16/2011 07:55:01 | 24.367 |
| 2/20/2011 02:06:01 | 24.086 | 2/16/2011 08:15:01 | 24.367 |
| 2/20/2011 02:26:01 | 24.023 | 2/16/2011 08:35:01 | 24.304 |
| 2/20/2011 02:46:01 | 23.898 | 2/16/2011 08:55:01 | 24.367 |
| 2/20/2011 03:06:01 | 23.836 | 2/16/2011 09:15:01 | 24.304 |
| 2/20/2011 03:26:01 | 23.773 | 2/16/2011 09:35:01 | 24.304 |
| 2/20/2011 03:46:01 | 23.836 | 2/16/2011 09:55:01 | 24.304 |
| 2/20/2011 04:06:01 | 23.836 | 2/16/2011 10:15:01 | 24.304 |
| 2/20/2011 04:26:01 | 23.898 | 2/16/2011 10:35:01 | 24.304 |
| 2/20/2011 04:46:01 | 24.023 | 2/16/2011 10:55:01 | 24.304 |
| 2/20/2011 05:06:01 | 24.086 | 2/16/2011 11:15:01 | 24.304 |
| 2/20/2011 05:26:01 | 24.086 | 2/16/2011 11:35:01 | 24.304 |
| 2/20/2011 05:46:01 | 24.086 | 2/16/2011 11:55:01 | 24.304 |
| 2/20/2011 06:06:01 | 24.086 | 2/16/2011 12:15:01 | 24.304 |
| 2/20/2011 06:26:01 | 24.398 | 2/16/2011 12:35:01 | 24.304 |
| 2/20/2011 06:46:01 | 24.774 | 2/16/2011 12:55:01 | 24.304 |
| 2/20/2011 07:06:01 | 25.274 | 2/16/2011 13:15:01 | 24.304 |
| 2/20/2011 07:26:01 | 25.899 | 2/16/2011 13:35:01 | 24.304 |
| 2/20/2011 07:46:01 | 26.273 | 2/16/2011 13:55:01 | 24.304 |
| 2/20/2011 08:06:01 | 26.586 | 2/16/2011 14:15:01 | 24.304 |
| 2/20/2011 08:26:01 | 27.586 | 2/16/2011 14:35:01 | 24.304 |
| 2/20/2011 08:46:01 | 28.085 | 2/16/2011 14:55:01 | 24.304 |

|                    |        |                    |        |
|--------------------|--------|--------------------|--------|
| 2/20/2011 09:06:01 | 28.647 | 2/16/2011 15:15:01 | 24.304 |
| 2/20/2011 09:26:01 | 28.897 | 2/16/2011 15:35:01 | 24.304 |
| 2/20/2011 09:46:01 | 28.585 | 2/16/2011 15:55:01 | 24.304 |
| 2/20/2011 10:06:01 | 29.397 | 2/16/2011 16:15:01 | 24.304 |
| 2/20/2011 10:26:01 | 29.834 | 2/16/2011 16:35:01 | 24.367 |
| 2/20/2011 10:46:01 | 29.584 | 2/16/2011 16:55:01 | 24.367 |
| 2/20/2011 11:06:01 | 30.146 | 2/16/2011 17:15:01 | 24.367 |
| 2/20/2011 11:26:01 | 29.459 | 2/16/2011 17:35:01 | 24.367 |
| 2/20/2011 11:46:01 | 30.021 | 2/16/2011 17:55:01 | 24.367 |
| 2/20/2011 12:06:01 | 30.708 | 2/16/2011 18:15:01 | 24.367 |
| 2/20/2011 12:26:01 | 31.645 | 2/16/2011 18:35:01 | 24.367 |
| 2/20/2011 12:46:01 | 31.769 | 2/16/2011 18:55:01 | 24.367 |
| 2/20/2011 13:06:01 | 31.957 | 2/16/2011 19:15:01 | 24.367 |
| 2/20/2011 13:26:01 | 32.206 | 2/16/2011 19:35:01 | 24.367 |
| 2/20/2011 13:46:01 | 30.084 | 2/16/2011 19:55:01 | 24.367 |
| 2/20/2011 14:06:01 | 30.209 | 2/16/2011 20:15:01 | 24.367 |
| 2/20/2011 14:26:01 | 31.395 | 2/16/2011 20:35:01 | 24.429 |
| 2/20/2011 14:46:01 | 31.707 | 2/16/2011 20:55:01 | 24.367 |
| 2/20/2011 15:06:01 | 31.832 | 2/16/2011 21:15:01 | 24.429 |
| 2/20/2011 15:26:01 | 30.458 | 2/16/2011 21:35:01 | 24.429 |
| 2/20/2011 15:46:01 | 30.833 | 2/16/2011 21:55:01 | 24.429 |
| 2/20/2011 16:06:01 | 30.271 | 2/16/2011 22:15:01 | 24.429 |
| 2/20/2011 16:26:01 | 29.772 | 2/16/2011 22:35:01 | 24.429 |
| 2/20/2011 16:46:01 | 28.960 | 2/16/2011 22:55:01 | 24.429 |
| 2/20/2011 17:06:01 | 28.835 | 2/16/2011 23:15:01 | 24.429 |
| 2/20/2011 17:26:01 | 28.585 | 2/16/2011 23:35:01 | 24.429 |
| 2/20/2011 17:46:01 | 28.398 | 2/16/2011 23:55:01 | 24.429 |
| 2/20/2011 18:06:01 | 28.148 | 2/17/2011 00:15:01 | 24.429 |
| 2/20/2011 18:26:01 | 27.710 | 2/17/2011 00:35:01 | 24.429 |
| 2/20/2011 18:46:01 | 27.148 | 2/17/2011 00:55:01 | 24.429 |
| 2/20/2011 19:06:01 | 26.586 | 2/17/2011 01:15:01 | 24.429 |
| 2/20/2011 19:26:01 | 26.148 | 2/17/2011 01:35:01 | 24.429 |
| 2/20/2011 19:46:01 | 25.899 | 2/17/2011 01:55:01 | 24.429 |
| 2/20/2011 20:06:01 | 25.649 | 2/17/2011 02:15:01 | 24.429 |
| 2/20/2011 20:26:01 | 25.399 | 2/17/2011 02:35:01 | 24.429 |
| 2/20/2011 20:46:01 | 25.086 | 2/17/2011 02:55:01 | 24.429 |
| 2/20/2011 21:06:01 | 24.899 | 2/17/2011 03:15:01 | 24.429 |
| 2/20/2011 21:26:01 | 24.774 | 2/17/2011 03:35:01 | 24.429 |
| 2/20/2011 21:46:01 | 24.774 | 2/17/2011 03:55:01 | 24.429 |
| 2/20/2011 22:06:01 | 24.648 | 2/17/2011 04:15:01 | 24.429 |
| 2/20/2011 22:26:01 | 24.523 | 2/17/2011 04:35:01 | 24.429 |
| 2/20/2011 22:46:01 | 24.461 | 2/17/2011 04:55:01 | 24.429 |
| 2/20/2011 23:06:01 | 24.461 | 2/17/2011 05:15:01 | 24.429 |
| 2/20/2011 23:26:01 | 24.461 | 2/17/2011 05:35:01 | 24.492 |
| 2/20/2011 23:46:01 | 24.461 | 2/17/2011 05:55:01 | 24.492 |
| 2/21/2011 00:06:01 | 24.523 | 2/17/2011 06:15:01 | 24.492 |
| 2/21/2011 00:26:01 | 24.711 | 2/17/2011 06:35:01 | 24.492 |
| 2/21/2011 00:46:01 | 24.836 | 2/17/2011 06:55:01 | 24.492 |
| 2/21/2011 01:06:01 | 24.899 | 2/17/2011 07:15:01 | 24.492 |
| 2/21/2011 01:26:01 | 24.836 | 2/17/2011 07:35:01 | 24.492 |

|                    |        |                    |        |
|--------------------|--------|--------------------|--------|
| 2/21/2011 01:46:01 | 24.836 | 2/17/2011 07:55:01 | 24.492 |
| 2/21/2011 02:06:01 | 24.899 | 2/17/2011 08:15:01 | 24.492 |
| 2/21/2011 02:26:01 | 24.836 | 2/17/2011 08:35:01 | 24.492 |
| 2/21/2011 02:46:01 | 24.648 | 2/17/2011 08:55:01 | 24.492 |
| 2/21/2011 03:06:01 | 24.336 | 2/17/2011 09:15:01 | 24.492 |
| 2/21/2011 03:26:01 | 24.086 | 2/17/2011 09:35:01 | 24.492 |
| 2/21/2011 03:46:01 | 23.961 | 2/17/2011 09:55:01 | 24.492 |
| 2/21/2011 04:06:01 | 23.836 | 2/17/2011 10:15:01 | 24.492 |
| 2/21/2011 04:26:01 | 23.648 | 2/17/2011 10:35:01 | 24.492 |
| 2/21/2011 04:46:01 | 23.711 | 2/17/2011 10:55:01 | 24.492 |
| 2/21/2011 05:06:01 | 23.898 | 2/17/2011 11:15:01 | 24.492 |
| 2/21/2011 05:26:01 | 24.023 | 2/17/2011 11:35:01 | 24.492 |
| 2/21/2011 05:46:01 | 24.023 | 2/17/2011 11:55:01 | 24.492 |
| 2/21/2011 06:06:01 | 23.961 | 2/17/2011 12:15:01 | 24.554 |
| 2/21/2011 06:26:01 | 23.961 | 2/17/2011 12:35:01 | 24.554 |
| 2/21/2011 06:46:01 | 24.273 | 2/17/2011 12:55:01 | 24.492 |
| 2/21/2011 07:06:01 | 25.024 | 2/17/2011 13:15:01 | 24.554 |
| 2/21/2011 07:26:01 | 25.836 | 2/17/2011 13:35:01 | 24.554 |
| 2/21/2011 07:46:01 | 26.711 | 2/17/2011 13:55:01 | 24.554 |
| 2/21/2011 08:06:01 | 26.961 | 2/17/2011 14:15:01 | 24.554 |
| 2/21/2011 08:26:01 | 27.211 | 2/17/2011 14:35:01 | 24.554 |
| 2/21/2011 08:46:01 | 27.461 | 2/17/2011 14:55:01 | 24.554 |
| 2/21/2011 09:06:01 | 28.148 | 2/17/2011 15:15:01 | 24.554 |
| 2/21/2011 09:26:01 | 28.772 | 2/17/2011 15:35:01 | 24.554 |
| 2/21/2011 09:46:01 | 29.522 | 2/17/2011 15:55:01 | 24.554 |
| 2/21/2011 10:06:01 | 29.085 | 2/17/2011 16:15:01 | 24.554 |
| 2/21/2011 10:26:01 | 28.085 | 2/17/2011 16:35:01 | 24.554 |
| 2/21/2011 10:46:01 | 28.460 | 2/17/2011 16:55:01 | 24.554 |
| 2/21/2011 11:06:01 | 29.772 | 2/17/2011 17:15:01 | 24.554 |
| 2/21/2011 11:26:01 | 30.084 | 2/17/2011 17:35:01 | 24.554 |
| 2/21/2011 11:46:01 | 30.958 | 2/17/2011 17:55:01 | 24.554 |
| 2/21/2011 12:06:01 | 31.645 | 2/17/2011 18:15:01 | 24.492 |
| 2/21/2011 12:26:01 | 32.206 | 2/17/2011 18:35:01 | 24.492 |
| 2/21/2011 12:46:01 | 32.643 | 2/17/2011 18:55:01 | 24.492 |
| 2/21/2011 13:06:01 | 32.081 | 2/17/2011 19:15:01 | 24.492 |
| 2/21/2011 13:26:01 | 32.331 | 2/17/2011 19:35:01 | 24.429 |
| 2/21/2011 13:46:01 | 32.081 | 2/17/2011 19:55:01 | 24.429 |
| 2/21/2011 14:06:01 | 30.708 | 2/17/2011 20:15:01 | 24.429 |
| 2/21/2011 14:26:01 | 30.209 | 2/17/2011 20:35:01 | 24.429 |
| 2/21/2011 14:46:01 | 30.583 | 2/17/2011 20:55:01 | 24.429 |
| 2/21/2011 15:06:01 | 30.146 | 2/17/2011 21:15:01 | 24.429 |
| 2/21/2011 15:26:01 | 29.772 | 2/17/2011 21:35:01 | 24.429 |
| 2/21/2011 15:46:01 | 28.460 | 2/17/2011 21:55:01 | 24.429 |
| 2/21/2011 16:06:01 | 27.960 | 2/17/2011 22:15:01 | 24.429 |
| 2/21/2011 16:26:01 | 27.773 | 2/17/2011 22:35:01 | 24.367 |
| 2/21/2011 16:46:01 | 26.648 | 2/17/2011 22:55:01 | 24.367 |
| 2/21/2011 17:06:01 | 25.649 | 2/17/2011 23:15:01 | 24.367 |
| 2/21/2011 17:26:01 | 25.586 | 2/17/2011 23:35:01 | 24.367 |
| 2/21/2011 17:46:01 | 25.524 | 2/17/2011 23:55:01 | 24.367 |
| 2/21/2011 18:06:01 | 25.399 | 2/18/2011 00:15:01 | 24.367 |

|                    |        |                    |        |
|--------------------|--------|--------------------|--------|
| 2/21/2011 18:26:01 | 25.336 | 2/18/2011 00:35:01 | 24.367 |
| 2/21/2011 18:46:01 | 25.086 | 2/18/2011 00:55:01 | 24.367 |
| 2/21/2011 19:06:01 | 24.961 | 2/18/2011 01:15:01 | 24.367 |
| 2/21/2011 19:26:01 | 24.836 | 2/18/2011 01:35:01 | 24.367 |
| 2/21/2011 19:46:01 | 24.711 | 2/18/2011 01:55:01 | 24.367 |
| 2/21/2011 20:06:01 | 24.648 | 2/18/2011 02:15:01 | 24.367 |
| 2/21/2011 20:26:01 | 24.648 | 2/18/2011 02:35:01 | 24.367 |
| 2/21/2011 20:46:01 | 24.586 | 2/18/2011 02:55:01 | 24.367 |
| 2/21/2011 21:06:01 | 24.523 | 2/18/2011 03:15:01 | 24.367 |
| 2/21/2011 21:26:01 | 24.586 | 2/18/2011 03:35:01 | 24.429 |
| 2/21/2011 21:46:01 | 24.461 | 2/18/2011 03:55:01 | 24.429 |
| 2/21/2011 22:06:01 | 24.398 | 2/18/2011 04:15:01 | 24.429 |
| 2/21/2011 22:26:01 | 24.211 | 2/18/2011 04:35:01 | 24.429 |
| 2/21/2011 22:46:01 | 24.086 | 2/18/2011 04:55:01 | 24.429 |
| 2/21/2011 23:06:01 | 24.023 | 2/18/2011 05:15:01 | 24.429 |
| 2/21/2011 23:26:01 | 24.148 | 2/18/2011 05:35:01 | 24.429 |
| 2/21/2011 23:46:01 | 24.086 | 2/18/2011 05:55:01 | 24.429 |
| 2/22/2011 00:06:01 | 24.086 | 2/18/2011 06:15:01 | 24.429 |
| 2/22/2011 00:26:01 | 23.898 | 2/18/2011 06:35:01 | 24.429 |
| 2/22/2011 00:46:01 | 23.648 | 2/18/2011 06:55:01 | 24.429 |
| 2/22/2011 01:06:01 | 23.523 | 2/18/2011 07:15:01 | 24.429 |
| 2/22/2011 01:26:01 | 23.398 | 2/18/2011 07:35:01 | 24.429 |
| 2/22/2011 01:46:01 | 23.398 | 2/18/2011 07:55:01 | 24.429 |
| 2/22/2011 02:06:01 | 23.336 | 2/18/2011 08:15:01 | 24.429 |
| 2/22/2011 02:26:01 | 23.336 | 2/18/2011 08:35:01 | 24.429 |
| 2/22/2011 02:46:01 | 23.336 | 2/18/2011 08:55:01 | 24.429 |
| 2/22/2011 03:06:01 | 23.398 | 2/18/2011 09:15:01 | 24.429 |
| 2/22/2011 03:26:01 | 23.336 | 2/18/2011 09:35:01 | 24.429 |
| 2/22/2011 03:46:01 | 23.211 | 2/18/2011 09:55:01 | 24.429 |
| 2/22/2011 04:06:01 | 23.086 | 2/18/2011 10:15:01 | 24.429 |
| 2/22/2011 04:26:01 | 22.960 | 2/18/2011 10:35:01 | 24.429 |
| 2/22/2011 04:46:01 | 22.835 | 2/18/2011 10:55:01 | 24.429 |
| 2/22/2011 05:06:01 | 22.773 | 2/18/2011 11:15:01 | 24.429 |
| 2/22/2011 05:26:01 | 22.648 | 2/18/2011 11:35:01 | 24.429 |
| 2/22/2011 05:46:01 | 22.585 | 2/18/2011 11:55:01 | 24.429 |
| 2/22/2011 06:06:01 | 22.585 | 2/18/2011 12:15:01 | 24.429 |
| 2/22/2011 06:26:01 | 22.898 | 2/18/2011 12:35:01 | 24.429 |
| 2/22/2011 06:46:01 | 23.273 | 2/18/2011 12:55:01 | 24.429 |
| 2/22/2011 07:06:01 | 23.836 | 2/18/2011 13:15:01 | 24.429 |
| 2/22/2011 07:26:01 | 24.523 | 2/18/2011 13:35:01 | 24.429 |
| 2/22/2011 07:46:01 | 25.336 | 2/18/2011 13:55:01 | 24.429 |
| 2/22/2011 08:06:01 | 25.961 | 2/18/2011 14:15:01 | 24.492 |
| 2/22/2011 08:26:01 | 26.523 | 2/18/2011 14:35:01 | 24.492 |
| 2/22/2011 08:46:01 | 27.211 | 2/18/2011 14:55:01 | 24.492 |
| 2/22/2011 09:06:01 | 27.336 | 2/18/2011 15:15:01 | 24.492 |
| 2/22/2011 09:26:01 | 27.710 | 2/18/2011 15:35:01 | 24.492 |
| 2/22/2011 09:46:01 | 27.648 | 2/18/2011 15:55:01 | 24.492 |
| 2/22/2011 10:06:01 | 28.523 | 2/18/2011 16:15:01 | 24.492 |
| 2/22/2011 10:26:01 | 28.835 | 2/18/2011 16:35:01 | 24.554 |
| 2/22/2011 10:46:01 | 29.210 | 2/18/2011 16:55:01 | 24.554 |



|                    |        |                    |        |
|--------------------|--------|--------------------|--------|
| 2/22/2011 11:06:01 | 29.022 | 2/18/2011 17:15:01 | 24.554 |
| 2/22/2011 11:26:01 | 28.897 | 2/18/2011 17:35:01 | 24.554 |
| 2/22/2011 11:46:01 | 29.834 | 2/18/2011 17:55:01 | 24.554 |
| 2/22/2011 12:06:01 | 29.334 | 2/18/2011 18:15:01 | 24.554 |
| 2/22/2011 12:26:01 | 29.459 | 2/18/2011 18:35:01 | 24.617 |
| 2/22/2011 12:46:01 | 30.021 | 2/18/2011 18:55:01 | 24.617 |
| 2/22/2011 13:06:01 | 30.521 | 2/18/2011 19:15:01 | 24.617 |
| 2/22/2011 13:26:01 | 32.081 | 2/18/2011 19:35:01 | 24.617 |
| 2/22/2011 13:46:01 | 31.957 | 2/18/2011 19:55:01 | 24.617 |
| 2/22/2011 14:06:01 | 32.144 | 2/18/2011 20:15:01 | 24.617 |
| 2/22/2011 14:26:01 | 32.206 | 2/18/2011 20:35:01 | 24.617 |
| 2/22/2011 14:46:01 | 32.206 | 2/18/2011 20:55:01 | 24.617 |
| 2/22/2011 15:06:01 | 32.206 | 2/18/2011 21:15:01 | 24.679 |
| 2/22/2011 15:26:01 | 31.145 | 2/18/2011 21:35:01 | 24.679 |
| 2/22/2011 15:46:01 | 30.458 | 2/18/2011 21:55:01 | 24.679 |
| 2/22/2011 16:06:01 | 30.708 | 2/18/2011 22:15:01 | 24.679 |
| 2/22/2011 16:26:01 | 30.396 | 2/18/2011 22:35:01 | 24.679 |
| 2/22/2011 16:46:01 | 29.459 | 2/18/2011 22:55:01 | 24.679 |
| 2/22/2011 17:06:01 | 28.523 | 2/18/2011 23:15:01 | 24.679 |
| 2/22/2011 17:26:01 | 27.835 | 2/18/2011 23:35:01 | 24.679 |
| 2/22/2011 17:46:01 | 27.835 | 2/18/2011 23:55:01 | 24.679 |
| 2/22/2011 18:06:01 | 27.586 | 2/19/2011 00:15:01 | 24.679 |
| 2/22/2011 18:26:01 | 27.211 | 2/19/2011 00:35:01 | 24.679 |
| 2/22/2011 18:46:01 | 26.898 | 2/19/2011 00:55:01 | 24.679 |
| 2/22/2011 19:06:01 | 25.649 | 2/19/2011 01:15:01 | 24.679 |
| 2/22/2011 19:26:01 | 23.398 | 2/19/2011 01:35:01 | 24.679 |
| 2/22/2011 19:46:01 | 22.648 | 2/19/2011 01:55:01 | 24.679 |
| 2/22/2011 20:06:01 | 22.710 | 2/19/2011 02:15:01 | 24.679 |
| 2/22/2011 20:26:01 | 22.835 | 2/19/2011 02:35:01 | 24.679 |
| 2/22/2011 20:46:01 | 22.835 | 2/19/2011 02:55:01 | 24.679 |
| 2/22/2011 21:06:01 | 22.773 | 2/19/2011 03:15:01 | 24.679 |
| 2/22/2011 21:26:01 | 22.773 | 2/19/2011 03:35:01 | 24.679 |
| 2/22/2011 21:46:01 | 22.835 | 2/19/2011 03:55:01 | 24.679 |
| 2/22/2011 22:06:01 | 22.898 | 2/19/2011 04:15:01 | 24.679 |
| 2/22/2011 22:26:01 | 22.773 | 2/19/2011 04:35:01 | 24.679 |
| 2/22/2011 22:46:01 | 22.898 | 2/19/2011 04:55:01 | 24.679 |
| 2/22/2011 23:06:01 | 23.148 | 2/19/2011 05:15:01 | 24.679 |
| 2/22/2011 23:26:01 | 23.148 | 2/19/2011 05:35:01 | 24.679 |
| 2/22/2011 23:46:01 | 23.148 | 2/19/2011 05:55:01 | 24.679 |
| 2/23/2011 00:06:01 | 23.086 | 2/19/2011 06:15:01 | 24.679 |
| 2/23/2011 00:26:01 | 23.211 | 2/19/2011 06:35:01 | 24.679 |
| 2/23/2011 00:46:01 | 23.086 | 2/19/2011 06:55:01 | 24.679 |
| 2/23/2011 01:06:01 | 23.023 | 2/19/2011 07:15:01 | 24.679 |
| 2/23/2011 01:26:01 | 22.898 | 2/19/2011 07:35:01 | 24.679 |
| 2/23/2011 01:46:01 | 22.835 | 2/19/2011 07:55:01 | 24.679 |
| 2/23/2011 02:06:01 | 22.773 | 2/19/2011 08:15:01 | 24.679 |
| 2/23/2011 02:26:01 | 22.773 | 2/19/2011 08:35:01 | 24.679 |
| 2/23/2011 02:46:01 | 22.773 | 2/19/2011 08:55:01 | 24.679 |
| 2/23/2011 03:06:01 | 22.835 | 2/19/2011 09:15:01 | 24.679 |
| 2/23/2011 03:26:01 | 22.898 | 2/19/2011 09:35:01 | 24.679 |

|                    |        |                    |        |
|--------------------|--------|--------------------|--------|
| 2/23/2011 03:46:01 | 22.898 | 2/19/2011 09:55:01 | 24.679 |
| 2/23/2011 04:06:01 | 22.960 | 2/19/2011 10:15:01 | 24.679 |
| 2/23/2011 04:26:01 | 22.835 | 2/19/2011 10:35:01 | 24.679 |
| 2/23/2011 04:46:01 | 22.835 | 2/19/2011 10:55:01 | 24.679 |
| 2/23/2011 05:06:01 | 22.835 | 2/19/2011 11:15:01 | 24.679 |
| 2/23/2011 05:26:01 | 22.898 | 2/19/2011 11:35:01 | 24.679 |
| 2/23/2011 05:46:01 | 22.898 | 2/19/2011 11:55:01 | 24.679 |
| 2/23/2011 06:06:01 | 22.835 | 2/19/2011 12:15:01 | 24.679 |
| 2/23/2011 06:26:01 | 23.148 | 2/19/2011 12:35:01 | 24.742 |
| 2/23/2011 06:46:01 | 23.586 | 2/19/2011 12:55:01 | 24.742 |
| 2/23/2011 07:06:01 | 23.898 | 2/19/2011 13:15:01 | 24.742 |
| 2/23/2011 07:26:01 | 24.273 | 2/19/2011 13:35:01 | 24.742 |
| 2/23/2011 07:46:01 | 24.523 | 2/19/2011 13:55:01 | 24.804 |
| 2/23/2011 08:06:01 | 24.961 | 2/19/2011 14:15:01 | 24.804 |
| 2/23/2011 08:26:01 | 25.899 | 2/19/2011 14:35:01 | 24.804 |
| 2/23/2011 08:46:01 | 26.711 | 2/19/2011 14:55:01 | 24.804 |
| 2/23/2011 09:06:01 | 27.148 | 2/19/2011 15:15:01 | 24.867 |
| 2/23/2011 09:26:01 | 27.648 | 2/19/2011 15:35:01 | 24.867 |
| 2/23/2011 09:46:01 | 27.960 | 2/19/2011 15:55:01 | 24.867 |
| 2/23/2011 10:06:01 | 27.960 | 2/19/2011 16:15:01 | 24.929 |
| 2/23/2011 10:26:01 | 28.523 | 2/19/2011 16:35:01 | 24.929 |
| 2/23/2011 10:46:01 | 28.273 | 2/19/2011 16:55:01 | 24.929 |
| 2/23/2011 11:06:01 | 29.397 | 2/19/2011 17:15:01 | 24.992 |
| 2/23/2011 11:26:01 | 28.647 | 2/19/2011 17:35:01 | 24.992 |
| 2/23/2011 11:46:01 | 29.709 | 2/19/2011 17:55:01 | 24.992 |
| 2/23/2011 12:06:01 | 30.583 | 2/19/2011 18:15:01 | 25.054 |
| 2/23/2011 12:26:01 | 31.020 | 2/19/2011 18:35:01 | 25.054 |
| 2/23/2011 12:46:01 | 29.459 | 2/19/2011 18:55:01 | 25.054 |
| 2/23/2011 13:06:01 | 29.709 | 2/19/2011 19:15:01 | 25.054 |
| 2/23/2011 13:26:01 | 30.209 | 2/19/2011 19:35:01 | 25.117 |
| 2/23/2011 13:46:01 | 29.147 | 2/19/2011 19:55:01 | 25.117 |
| 2/23/2011 14:06:01 | 29.147 | 2/19/2011 20:15:01 | 25.117 |
| 2/23/2011 14:26:01 | 29.397 | 2/19/2011 20:35:01 | 25.117 |
| 2/23/2011 14:46:01 | 30.396 | 2/19/2011 20:55:01 | 25.117 |
| 2/23/2011 15:06:01 | 29.834 | 2/19/2011 21:15:01 | 25.117 |
| 2/23/2011 15:26:01 | 29.522 | 2/19/2011 21:35:01 | 25.117 |
| 2/23/2011 15:46:01 | 28.460 | 2/19/2011 21:55:01 | 25.117 |
| 2/23/2011 16:06:01 | 27.960 | 2/19/2011 22:15:01 | 25.117 |
| 2/23/2011 16:26:01 | 26.711 | 2/19/2011 22:35:01 | 25.117 |
| 2/23/2011 16:46:01 | 25.211 | 2/19/2011 22:55:01 | 25.117 |
| 2/23/2011 17:06:01 | 25.461 | 2/19/2011 23:15:01 | 25.117 |
| 2/23/2011 17:26:01 | 25.711 | 2/19/2011 23:35:01 | 25.117 |
| 2/23/2011 17:46:01 | 25.711 | 2/19/2011 23:55:01 | 25.117 |
| 2/23/2011 18:06:01 | 25.586 | 2/20/2011 00:15:01 | 25.117 |
| 2/23/2011 18:26:01 | 25.336 | 2/20/2011 00:35:01 | 25.117 |
| 2/23/2011 18:46:01 | 25.086 | 2/20/2011 00:55:01 | 25.117 |
| 2/23/2011 19:06:01 | 25.024 | 2/20/2011 01:15:01 | 25.117 |
| 2/23/2011 19:26:01 | 24.961 | 2/20/2011 01:35:01 | 25.117 |
| 2/23/2011 19:46:01 | 24.211 | 2/20/2011 01:55:01 | 25.054 |
| 2/23/2011 20:06:01 | 23.711 | 2/20/2011 02:15:01 | 25.054 |

|                    |        |                    |        |
|--------------------|--------|--------------------|--------|
| 2/23/2011 20:26:01 | 23.398 | 2/20/2011 02:35:01 | 25.054 |
| 2/23/2011 20:46:01 | 23.461 | 2/20/2011 02:55:01 | 25.054 |
| 2/23/2011 21:06:01 | 23.148 | 2/20/2011 03:15:01 | 25.054 |
| 2/23/2011 21:26:01 | 23.148 | 2/20/2011 03:35:01 | 25.054 |
| 2/23/2011 21:46:01 | 23.086 | 2/20/2011 03:55:01 | 25.054 |
| 2/23/2011 22:06:01 | 23.086 | 2/20/2011 04:15:01 | 25.054 |
| 2/23/2011 22:26:01 | 23.023 | 2/20/2011 04:35:01 | 24.992 |
| 2/23/2011 22:46:01 | 22.960 | 2/20/2011 04:55:01 | 24.992 |
| 2/23/2011 23:06:01 | 22.960 | 2/20/2011 05:15:01 | 24.992 |
| 2/23/2011 23:26:01 | 22.960 | 2/20/2011 05:35:01 | 24.992 |
| 2/23/2011 23:46:01 | 22.898 | 2/20/2011 05:55:01 | 24.992 |
| 2/24/2011 00:06:01 | 22.898 | 2/20/2011 06:15:01 | 24.992 |
| 2/24/2011 00:26:01 | 23.023 | 2/20/2011 06:35:01 | 24.992 |
| 2/24/2011 00:46:01 | 23.086 | 2/20/2011 06:55:01 | 24.929 |
| 2/24/2011 01:06:01 | 23.086 | 2/20/2011 07:15:01 | 24.929 |
| 2/24/2011 01:26:01 | 22.960 | 2/20/2011 07:35:01 | 24.929 |
| 2/24/2011 01:46:01 | 22.710 | 2/20/2011 07:55:01 | 24.929 |
| 2/24/2011 02:06:01 | 22.398 | 2/20/2011 08:15:01 | 24.929 |
| 2/24/2011 02:26:01 | 22.210 | 2/20/2011 08:35:01 | 24.929 |
| 2/24/2011 02:46:01 | 22.210 | 2/20/2011 08:55:01 | 24.929 |
| 2/24/2011 03:06:01 | 22.273 | 2/20/2011 09:15:01 | 24.929 |
| 2/24/2011 03:26:01 | 22.398 | 2/20/2011 09:35:01 | 24.929 |
| 2/24/2011 03:46:01 | 22.398 | 2/20/2011 09:55:01 | 24.929 |
| 2/24/2011 04:06:01 | 22.335 | 2/20/2011 10:15:01 | 24.867 |
| 2/24/2011 04:26:01 | 22.210 | 2/20/2011 10:35:01 | 24.929 |
| 2/24/2011 04:46:01 | 22.085 | 2/20/2011 10:55:01 | 24.929 |
| 2/24/2011 05:06:01 | 21.960 | 2/20/2011 11:15:01 | 24.929 |
| 2/24/2011 05:26:01 | 21.835 | 2/20/2011 11:35:01 | 24.929 |
| 2/24/2011 05:46:01 | 21.772 | 2/20/2011 11:55:01 | 24.929 |
| 2/24/2011 06:06:01 | 21.772 | 2/20/2011 12:15:01 | 24.992 |
| 2/24/2011 06:26:01 | 21.960 | 2/20/2011 12:35:01 | 24.992 |
| 2/24/2011 06:46:01 | 22.273 | 2/20/2011 12:55:01 | 25.054 |
| 2/24/2011 07:06:01 | 22.835 | 2/20/2011 13:15:01 | 25.054 |
| 2/24/2011 07:26:01 | 23.461 | 2/20/2011 13:35:01 | 25.054 |
| 2/24/2011 07:46:01 | 24.211 | 2/20/2011 13:55:01 | 25.054 |
| 2/24/2011 08:06:01 | 24.461 | 2/20/2011 14:15:01 | 25.117 |
| 2/24/2011 08:26:01 | 24.899 | 2/20/2011 14:35:01 | 25.117 |
| 2/24/2011 08:46:01 | 25.399 | 2/20/2011 14:55:01 | 25.117 |
| 2/24/2011 09:06:01 | 26.211 | 2/20/2011 15:15:01 | 25.179 |
| 2/24/2011 09:26:01 | 26.648 | 2/20/2011 15:35:01 | 25.179 |
| 2/24/2011 09:46:01 | 27.336 | 2/20/2011 15:55:01 | 25.242 |
| 2/24/2011 10:06:01 | 28.023 | 2/20/2011 16:15:01 | 25.242 |
| 2/24/2011 10:26:01 | 28.460 | 2/20/2011 16:35:01 | 25.242 |
| 2/24/2011 10:46:01 | 28.835 | 2/20/2011 16:55:01 | 25.304 |
| 2/24/2011 11:06:01 | 29.397 | 2/20/2011 17:15:01 | 25.304 |
| 2/24/2011 11:26:01 | 30.021 | 2/20/2011 17:35:01 | 25.304 |
| 2/24/2011 11:46:01 | 30.708 | 2/20/2011 17:55:01 | 25.304 |
| 2/24/2011 12:06:01 | 28.960 | 2/20/2011 18:15:01 | 25.367 |
| 2/24/2011 12:26:01 | 28.772 | 2/20/2011 18:35:01 | 25.367 |
| 2/24/2011 12:46:01 | 30.021 | 2/20/2011 18:55:01 | 25.367 |

|                    |        |                    |        |
|--------------------|--------|--------------------|--------|
| 2/24/2011 13:06:01 | 29.085 | 2/20/2011 19:15:01 | 25.367 |
| 2/24/2011 13:26:01 | 30.583 | 2/20/2011 19:35:01 | 25.367 |
| 2/24/2011 13:46:01 | 30.895 | 2/20/2011 19:55:01 | 25.367 |
| 2/24/2011 14:06:01 | 30.521 | 2/20/2011 20:15:01 | 25.429 |
| 2/24/2011 14:26:01 | 31.395 | 2/20/2011 20:35:01 | 25.429 |
| 2/24/2011 14:46:01 | 30.396 | 2/20/2011 20:55:01 | 25.429 |
| 2/24/2011 15:06:01 | 30.209 | 2/20/2011 21:15:01 | 25.429 |
| 2/24/2011 15:26:01 | 30.521 | 2/20/2011 21:35:01 | 25.429 |
| 2/24/2011 15:46:01 | 29.834 | 2/20/2011 21:55:01 | 25.429 |
| 2/24/2011 16:06:01 | 29.584 | 2/20/2011 22:15:01 | 25.429 |
| 2/24/2011 16:26:01 | 29.272 | 2/20/2011 22:35:01 | 25.429 |
| 2/24/2011 16:46:01 | 29.522 | 2/20/2011 22:55:01 | 25.429 |
| 2/24/2011 17:06:01 | 28.960 | 2/20/2011 23:15:01 | 25.429 |
| 2/24/2011 17:26:01 | 28.710 | 2/20/2011 23:35:01 | 25.367 |
| 2/24/2011 17:46:01 | 28.398 | 2/20/2011 23:55:01 | 25.367 |
| 2/24/2011 18:06:01 | 27.960 | 2/21/2011 00:15:01 | 25.367 |
| 2/24/2011 18:26:01 | 27.273 | 2/21/2011 00:35:01 | 25.367 |
| 2/24/2011 18:46:01 | 26.523 | 2/21/2011 00:55:01 | 25.367 |
| 2/24/2011 19:06:01 | 25.961 | 2/21/2011 01:15:01 | 25.367 |
| 2/24/2011 19:26:01 | 25.586 | 2/21/2011 01:35:01 | 25.367 |
| 2/24/2011 19:46:01 | 25.399 | 2/21/2011 01:55:01 | 25.367 |
| 2/24/2011 20:06:01 | 25.336 | 2/21/2011 02:15:01 | 25.304 |
| 2/24/2011 20:26:01 | 25.336 | 2/21/2011 02:35:01 | 25.304 |
| 2/24/2011 20:46:01 | 25.274 | 2/21/2011 02:55:01 | 25.304 |
| 2/24/2011 21:06:01 | 25.211 | 2/21/2011 03:15:01 | 25.304 |
| 2/24/2011 21:26:01 | 25.149 | 2/21/2011 03:35:01 | 25.304 |
| 2/24/2011 21:46:01 | 25.086 | 2/21/2011 03:55:01 | 25.304 |
| 2/24/2011 22:06:01 | 25.024 | 2/21/2011 04:15:01 | 25.242 |
| 2/24/2011 22:26:01 | 25.024 | 2/21/2011 04:35:01 | 25.242 |
| 2/24/2011 22:46:01 | 25.024 | 2/21/2011 04:55:01 | 25.242 |
| 2/24/2011 23:06:01 | 24.961 | 2/21/2011 05:15:01 | 25.242 |
| 2/24/2011 23:26:01 | 24.899 | 2/21/2011 05:35:01 | 25.242 |
| 2/24/2011 23:46:01 | 24.711 | 2/21/2011 05:55:01 | 25.242 |
| 2/25/2011 00:06:01 | 24.774 | 2/21/2011 06:15:01 | 25.242 |
| 2/25/2011 00:26:01 | 24.836 | 2/21/2011 06:35:01 | 25.179 |
| 2/25/2011 00:46:01 | 24.899 | 2/21/2011 06:55:01 | 25.179 |
| 2/25/2011 01:06:01 | 25.086 | 2/21/2011 07:15:01 | 25.179 |
| 2/25/2011 01:26:01 | 25.086 | 2/21/2011 07:35:01 | 25.179 |
| 2/25/2011 01:46:01 | 24.899 | 2/21/2011 07:55:01 | 25.179 |
| 2/25/2011 02:06:01 | 24.648 | 2/21/2011 08:15:01 | 25.179 |
| 2/25/2011 02:26:01 | 24.211 | 2/21/2011 08:35:01 | 25.179 |
| 2/25/2011 02:46:01 | 23.461 | 2/21/2011 08:55:01 | 25.117 |
| 2/25/2011 03:06:01 | 23.211 | 2/21/2011 09:15:01 | 25.117 |
| 2/25/2011 03:26:01 | 23.148 | 2/21/2011 09:35:01 | 25.117 |
| 2/25/2011 03:46:01 | 23.086 | 2/21/2011 09:55:01 | 25.117 |
| 2/25/2011 04:06:01 | 23.086 | 2/21/2011 10:15:01 | 25.117 |
| 2/25/2011 04:26:01 | 23.086 | 2/21/2011 10:35:01 | 25.117 |
| 2/25/2011 04:46:01 | 23.086 | 2/21/2011 10:55:01 | 25.117 |
| 2/25/2011 05:06:01 | 23.086 | 2/21/2011 11:15:01 | 25.117 |
| 2/25/2011 05:26:01 | 23.086 | 2/21/2011 11:35:01 | 25.117 |

|                    |        |                    |        |
|--------------------|--------|--------------------|--------|
| 2/25/2011 05:46:01 | 23.086 | 2/21/2011 11:55:01 | 25.117 |
| 2/25/2011 06:06:01 | 23.211 | 2/21/2011 12:15:01 | 25.179 |
| 2/25/2011 06:26:01 | 23.211 | 2/21/2011 12:35:01 | 25.179 |
| 2/25/2011 06:46:01 | 23.211 | 2/21/2011 12:55:01 | 25.179 |
| 2/25/2011 07:06:01 | 23.336 | 2/21/2011 13:15:01 | 25.179 |
| 2/25/2011 07:26:01 | 23.461 | 2/21/2011 13:35:01 | 25.242 |
| 2/25/2011 07:46:01 | 23.648 | 2/21/2011 13:55:01 | 25.242 |
| 2/25/2011 08:06:01 | 23.898 | 2/21/2011 14:15:01 | 25.242 |
| 2/25/2011 08:26:01 | 24.148 | 2/21/2011 14:35:01 | 25.304 |
| 2/25/2011 08:46:01 | 24.586 | 2/21/2011 14:55:01 | 25.304 |
| 2/25/2011 09:06:01 | 25.211 | 2/21/2011 15:15:01 | 25.304 |
| 2/25/2011 09:26:01 | 26.148 | 2/21/2011 15:35:01 | 25.304 |
| 2/25/2011 09:46:01 | 26.773 | 2/21/2011 15:55:01 | 25.367 |
| 2/25/2011 10:06:01 | 27.648 | 2/21/2011 16:15:01 | 25.367 |
| 2/25/2011 10:26:01 | 27.773 | 2/21/2011 16:35:01 | 25.367 |
| 2/25/2011 10:46:01 | 27.835 | 2/21/2011 16:55:01 | 25.367 |
| 2/25/2011 11:06:01 | 27.523 | 2/21/2011 17:15:01 | 25.429 |
| 2/25/2011 11:26:01 | 27.898 | 2/21/2011 17:35:01 | 25.429 |
| 2/25/2011 11:46:01 | 27.960 | 2/21/2011 17:55:01 | 25.429 |
| 2/25/2011 12:06:01 | 29.522 | 2/21/2011 18:15:01 | 25.429 |
| 2/25/2011 12:26:01 | 30.084 | 2/21/2011 18:35:01 | 25.429 |
| 2/25/2011 12:46:01 | 30.958 | 2/21/2011 18:55:01 | 25.429 |
| 2/25/2011 13:06:01 | 30.958 | 2/21/2011 19:15:01 | 25.429 |
| 2/25/2011 13:26:01 | 31.270 | 2/21/2011 19:35:01 | 25.429 |
| 2/25/2011 13:46:01 | 31.707 | 2/21/2011 19:55:01 | 25.429 |
| 2/25/2011 14:06:01 | 31.769 | 2/21/2011 20:15:01 | 25.429 |
| 2/25/2011 14:26:01 | 29.085 | 2/21/2011 20:35:01 | 25.429 |
| 2/25/2011 14:46:01 | 28.210 | 2/21/2011 20:55:01 | 25.429 |
| 2/25/2011 15:06:01 | 27.898 | 2/21/2011 21:15:01 | 25.429 |
| 2/25/2011 15:26:01 | 27.960 | 2/21/2011 21:35:01 | 25.429 |
| 2/25/2011 15:46:01 | 27.960 | 2/21/2011 21:55:01 | 25.429 |
| 2/25/2011 16:06:01 | 28.023 | 2/21/2011 22:15:01 | 25.429 |
| 2/25/2011 16:26:01 | 28.085 | 2/21/2011 22:35:01 | 25.429 |
| 2/25/2011 16:46:01 | 27.835 | 2/21/2011 22:55:01 | 25.429 |
| 2/25/2011 17:06:01 | 27.398 | 2/21/2011 23:15:01 | 25.367 |
| 2/25/2011 17:26:01 | 26.961 | 2/21/2011 23:35:01 | 25.367 |
| 2/25/2011 17:46:01 | 26.461 | 2/21/2011 23:55:01 | 25.367 |
| 2/25/2011 18:06:01 | 26.086 | 2/22/2011 00:15:01 | 25.367 |
| 2/25/2011 18:26:01 | 25.899 | 2/22/2011 00:35:01 | 25.367 |
| 2/25/2011 18:46:01 | 25.461 | 2/22/2011 00:55:01 | 25.304 |
| 2/25/2011 19:06:01 | 25.211 | 2/22/2011 01:15:01 | 25.304 |
| 2/25/2011 19:26:01 | 25.086 | 2/22/2011 01:35:01 | 25.304 |
| 2/25/2011 19:46:01 | 24.961 | 2/22/2011 01:55:01 | 25.304 |
| 2/25/2011 20:06:01 | 24.899 | 2/22/2011 02:15:01 | 25.304 |
| 2/25/2011 20:26:01 | 24.836 | 2/22/2011 02:35:01 | 25.242 |
| 2/25/2011 20:46:01 | 24.648 | 2/22/2011 02:55:01 | 25.242 |
| 2/25/2011 21:06:01 | 24.398 | 2/22/2011 03:15:01 | 25.242 |
| 2/25/2011 21:26:01 | 24.211 | 2/22/2011 03:35:01 | 25.242 |
| 2/25/2011 21:46:01 | 24.086 | 2/22/2011 03:55:01 | 25.242 |
| 2/25/2011 22:06:01 | 23.961 | 2/22/2011 04:15:01 | 25.179 |

|                    |        |                    |        |
|--------------------|--------|--------------------|--------|
| 2/25/2011 22:26:01 | 23.898 | 2/22/2011 04:35:01 | 25.179 |
| 2/25/2011 22:46:01 | 23.961 | 2/22/2011 04:55:01 | 25.179 |
| 2/25/2011 23:06:01 | 24.148 | 2/22/2011 05:15:01 | 25.179 |
| 2/25/2011 23:26:01 | 23.961 | 2/22/2011 05:35:01 | 25.179 |
| 2/25/2011 23:46:01 | 23.898 | 2/22/2011 05:55:01 | 25.117 |
| 2/26/2011 00:06:01 | 23.961 | 2/22/2011 06:15:01 | 25.117 |
| 2/26/2011 00:26:01 | 23.898 | 2/22/2011 06:35:01 | 25.117 |
| 2/26/2011 00:46:01 | 23.836 | 2/22/2011 06:55:01 | 25.117 |
| 2/26/2011 01:06:01 | 23.836 | 2/22/2011 07:15:01 | 25.054 |
| 2/26/2011 01:26:01 | 23.898 | 2/22/2011 07:35:01 | 25.054 |
| 2/26/2011 01:46:01 | 24.023 | 2/22/2011 07:55:01 | 25.054 |
| 2/26/2011 02:06:01 | 24.148 | 2/22/2011 08:15:01 | 25.054 |
| 2/26/2011 02:26:01 | 24.148 | 2/22/2011 08:35:01 | 24.992 |
| 2/26/2011 02:46:01 | 24.273 | 2/22/2011 08:55:01 | 24.992 |
| 2/26/2011 03:06:01 | 24.023 | 2/22/2011 09:15:01 | 24.992 |
| 2/26/2011 03:26:01 | 23.773 | 2/22/2011 09:35:01 | 24.992 |
| 2/26/2011 03:46:01 | 23.336 | 2/22/2011 09:55:01 | 24.992 |
| 2/26/2011 04:06:01 | 23.148 | 2/22/2011 10:15:01 | 24.992 |
| 2/26/2011 04:26:01 | 23.023 | 2/22/2011 10:35:01 | 24.992 |
| 2/26/2011 04:46:01 | 22.898 | 2/22/2011 10:55:01 | 24.992 |
| 2/26/2011 05:06:01 | 22.898 | 2/22/2011 11:15:01 | 24.992 |
| 2/26/2011 05:26:01 | 22.898 | 2/22/2011 11:35:01 | 24.992 |
| 2/26/2011 05:46:01 | 22.898 | 2/22/2011 11:55:01 | 24.992 |
| 2/26/2011 06:06:01 | 22.898 | 2/22/2011 12:15:01 | 24.992 |
| 2/26/2011 06:26:01 | 23.023 | 2/22/2011 12:35:01 | 25.054 |
| 2/26/2011 06:46:01 | 23.273 | 2/22/2011 12:55:01 | 25.054 |
| 2/26/2011 07:06:01 | 23.398 | 2/22/2011 13:15:01 | 25.054 |
| 2/26/2011 07:26:01 | 23.398 | 2/22/2011 13:35:01 | 25.117 |
| 2/26/2011 07:46:01 | 23.461 | 2/22/2011 13:55:01 | 25.117 |
| 2/26/2011 08:06:01 | 23.648 | 2/22/2011 14:15:01 | 25.117 |
| 2/26/2011 08:26:01 | 24.086 | 2/22/2011 14:35:01 | 25.117 |
| 2/26/2011 08:46:01 | 24.336 | 2/22/2011 14:55:01 | 25.179 |
| 2/26/2011 09:06:01 | 25.024 | 2/22/2011 15:15:01 | 25.179 |
| 2/26/2011 09:26:01 | 25.774 | 2/22/2011 15:35:01 | 25.242 |
| 2/26/2011 09:46:01 | 26.024 | 2/22/2011 15:55:01 | 25.242 |
| 2/26/2011 10:06:01 | 26.586 | 2/22/2011 16:15:01 | 25.242 |
| 2/26/2011 10:26:01 | 26.898 | 2/22/2011 16:35:01 | 25.304 |
| 2/26/2011 10:46:01 | 26.898 | 2/22/2011 16:55:01 | 25.304 |
| 2/26/2011 11:06:01 | 27.710 | 2/22/2011 17:15:01 | 25.304 |
| 2/26/2011 11:26:01 | 28.772 | 2/22/2011 17:35:01 | 25.367 |
| 2/26/2011 11:46:01 | 29.210 | 2/22/2011 17:55:01 | 25.367 |
| 2/26/2011 12:06:01 | 29.147 | 2/22/2011 18:15:01 | 25.367 |
| 2/26/2011 12:26:01 | 30.334 | 2/22/2011 18:35:01 | 25.429 |
| 2/26/2011 12:46:01 | 30.646 | 2/22/2011 18:55:01 | 25.429 |
| 2/26/2011 13:06:01 | 29.584 | 2/22/2011 19:15:01 | 25.429 |
| 2/26/2011 13:26:01 | 30.396 | 2/22/2011 19:35:01 | 25.429 |
| 2/26/2011 13:46:01 | 29.959 | 2/22/2011 19:55:01 | 25.429 |
| 2/26/2011 14:06:01 | 30.271 | 2/22/2011 20:15:01 | 25.429 |
| 2/26/2011 14:26:01 | 28.835 | 2/22/2011 20:35:01 | 25.492 |
| 2/26/2011 14:46:01 | 28.460 | 2/22/2011 20:55:01 | 25.492 |

|                    |        |                    |        |
|--------------------|--------|--------------------|--------|
| 2/26/2011 15:06:01 | 28.835 | 2/22/2011 21:15:01 | 25.492 |
| 2/26/2011 15:26:01 | 29.647 | 2/22/2011 21:35:01 | 25.429 |
| 2/26/2011 15:46:01 | 29.147 | 2/22/2011 21:55:01 | 25.429 |
| 2/26/2011 16:06:01 | 28.398 | 2/22/2011 22:15:01 | 25.429 |
| 2/26/2011 16:26:01 | 28.210 | 2/22/2011 22:35:01 | 25.429 |
| 2/26/2011 16:46:01 | 27.586 | 2/22/2011 22:55:01 | 25.367 |
| 2/26/2011 17:06:01 | 27.086 | 2/22/2011 23:15:01 | 25.367 |
| 2/26/2011 17:26:01 | 26.586 | 2/22/2011 23:35:01 | 25.367 |
| 2/26/2011 17:46:01 | 26.148 | 2/22/2011 23:55:01 | 25.367 |
| 2/26/2011 18:06:01 | 25.836 | 2/23/2011 00:15:01 | 25.304 |
| 2/26/2011 18:26:01 | 25.649 | 2/23/2011 00:35:01 | 25.304 |
| 2/26/2011 18:46:01 | 25.211 | 2/23/2011 00:55:01 | 25.304 |
| 2/26/2011 19:06:01 | 24.961 | 2/23/2011 01:15:01 | 25.242 |
| 2/26/2011 19:26:01 | 24.711 | 2/23/2011 01:35:01 | 25.242 |
| 2/26/2011 19:46:01 | 24.523 | 2/23/2011 01:55:01 | 25.242 |
| 2/26/2011 20:06:01 | 24.461 | 2/23/2011 02:15:01 | 25.242 |
| 2/26/2011 20:26:01 | 24.273 | 2/23/2011 02:35:01 | 25.179 |
| 2/26/2011 20:46:01 | 24.086 | 2/23/2011 02:55:01 | 25.179 |
| 2/26/2011 21:06:01 | 23.961 | 2/23/2011 03:15:01 | 25.179 |
| 2/26/2011 21:26:01 | 23.961 | 2/23/2011 03:35:01 | 25.117 |
| 2/26/2011 21:46:01 | 24.148 | 2/23/2011 03:55:01 | 25.117 |
| 2/26/2011 22:06:01 | 24.398 | 2/23/2011 04:15:01 | 25.117 |
| 2/26/2011 22:26:01 | 24.398 | 2/23/2011 04:35:01 | 25.117 |
| 2/26/2011 22:46:01 | 24.398 | 2/23/2011 04:55:01 | 25.054 |
| 2/26/2011 23:06:01 | 24.461 | 2/23/2011 05:15:01 | 25.054 |
| 2/26/2011 23:26:01 | 24.461 | 2/23/2011 05:35:01 | 25.054 |
| 2/26/2011 23:46:01 | 24.523 | 2/23/2011 05:55:01 | 25.054 |
| 2/27/2011 00:06:01 | 24.586 | 2/23/2011 06:15:01 | 24.992 |
| 2/27/2011 00:26:01 | 24.711 | 2/23/2011 06:35:01 | 24.992 |
| 2/27/2011 00:46:01 | 23.836 | 2/23/2011 06:55:01 | 24.992 |
| 2/27/2011 01:06:01 | 23.023 | 2/23/2011 07:15:01 | 24.992 |
| 2/27/2011 01:26:01 | 22.773 | 2/23/2011 07:35:01 | 24.929 |
| 2/27/2011 01:46:01 | 22.648 | 2/23/2011 07:55:01 | 24.929 |
| 2/27/2011 02:06:01 | 22.523 | 2/23/2011 08:15:01 | 24.929 |
| 2/27/2011 02:26:01 | 22.460 | 2/23/2011 08:35:01 | 24.929 |
| 2/27/2011 02:46:01 | 22.460 | 2/23/2011 08:55:01 | 24.929 |
| 2/27/2011 03:06:01 | 22.460 | 2/23/2011 09:15:01 | 24.867 |
| 2/27/2011 03:26:01 | 22.523 | 2/23/2011 09:35:01 | 24.867 |
| 2/27/2011 03:46:01 | 22.460 | 2/23/2011 09:55:01 | 24.867 |
| 2/27/2011 04:06:01 | 22.460 | 2/23/2011 10:15:01 | 24.867 |
| 2/27/2011 04:26:01 | 22.523 | 2/23/2011 10:35:01 | 24.867 |
| 2/27/2011 04:46:01 | 22.523 | 2/23/2011 10:55:01 | 24.867 |
| 2/27/2011 05:06:01 | 22.523 | 2/23/2011 11:15:01 | 24.867 |
| 2/27/2011 05:26:01 | 22.460 | 2/23/2011 11:35:01 | 24.867 |
| 2/27/2011 05:46:01 | 22.335 | 2/23/2011 11:55:01 | 24.929 |
| 2/27/2011 06:06:01 | 22.460 | 2/23/2011 12:15:01 | 24.929 |
| 2/27/2011 06:26:01 | 22.585 | 2/23/2011 12:35:01 | 24.929 |
| 2/27/2011 06:46:01 | 22.898 | 2/23/2011 12:55:01 | 24.992 |
| 2/27/2011 07:06:01 | 23.336 | 2/23/2011 13:15:01 | 24.992 |
| 2/27/2011 07:26:01 | 23.773 | 2/23/2011 13:35:01 | 24.992 |

|                    |        |                    |        |
|--------------------|--------|--------------------|--------|
| 2/27/2011 07:46:01 | 24.148 | 2/23/2011 13:55:01 | 25.054 |
| 2/27/2011 08:06:01 | 24.648 | 2/23/2011 14:15:01 | 25.054 |
| 2/27/2011 08:26:01 | 25.336 | 2/23/2011 14:35:01 | 25.054 |
| 2/27/2011 08:46:01 | 25.899 | 2/23/2011 14:55:01 | 25.117 |
| 2/27/2011 09:06:01 | 26.273 | 2/23/2011 15:15:01 | 25.117 |
| 2/27/2011 09:26:01 | 26.648 | 2/23/2011 15:35:01 | 25.117 |
| 2/27/2011 09:46:01 | 27.148 | 2/23/2011 15:55:01 | 25.179 |
| 2/27/2011 10:06:01 | 27.523 | 2/23/2011 16:15:01 | 25.179 |
| 2/27/2011 10:26:01 | 27.773 | 2/23/2011 16:35:01 | 25.179 |
| 2/27/2011 10:46:01 | 27.835 | 2/23/2011 16:55:01 | 25.242 |
| 2/27/2011 11:06:01 | 28.273 | 2/23/2011 17:15:01 | 25.242 |
| 2/27/2011 11:26:01 | 28.897 | 2/23/2011 17:35:01 | 25.242 |
| 2/27/2011 11:46:01 | 29.334 | 2/23/2011 17:55:01 | 25.242 |
| 2/27/2011 12:06:01 | 28.523 | 2/23/2011 18:15:01 | 25.304 |
| 2/27/2011 12:26:01 | 28.148 | 2/23/2011 18:35:01 | 25.304 |
| 2/27/2011 12:46:01 | 28.273 | 2/23/2011 18:55:01 | 25.304 |
| 2/27/2011 13:06:01 | 28.273 | 2/23/2011 19:15:01 | 25.304 |
| 2/27/2011 13:26:01 | 30.084 | 2/23/2011 19:35:01 | 25.304 |
| 2/27/2011 13:46:01 | 30.708 | 2/23/2011 19:55:01 | 25.304 |
| 2/27/2011 14:06:01 | 31.270 | 2/23/2011 20:15:01 | 25.304 |
| 2/27/2011 14:26:01 | 30.646 | 2/23/2011 20:35:01 | 25.304 |
| 2/27/2011 14:46:01 | 29.085 | 2/23/2011 20:55:01 | 25.304 |
| 2/27/2011 15:06:01 | 27.898 | 2/23/2011 21:15:01 | 25.304 |
| 2/27/2011 15:26:01 | 27.586 | 2/23/2011 21:35:01 | 25.304 |
| 2/27/2011 15:46:01 | 27.336 | 2/23/2011 21:55:01 | 25.304 |
| 2/27/2011 16:06:01 | 27.336 | 2/23/2011 22:15:01 | 25.242 |
| 2/27/2011 16:26:01 | 27.398 | 2/23/2011 22:35:01 | 25.242 |
| 2/27/2011 16:46:01 | 27.273 | 2/23/2011 22:55:01 | 25.242 |
| 2/27/2011 17:06:01 | 27.398 | 2/23/2011 23:15:01 | 25.179 |
| 2/27/2011 17:26:01 | 27.586 | 2/23/2011 23:35:01 | 25.179 |
| 2/27/2011 17:46:01 | 27.586 | 2/23/2011 23:55:01 | 25.179 |
| 2/27/2011 18:06:01 | 27.336 | 2/24/2011 00:15:01 | 25.179 |
| 2/27/2011 18:26:01 | 26.898 | 2/24/2011 00:35:01 | 25.117 |
| 2/27/2011 18:46:01 | 26.461 | 2/24/2011 00:55:01 | 25.117 |
| 2/27/2011 19:06:01 | 26.024 | 2/24/2011 01:15:01 | 25.117 |
| 2/27/2011 19:26:01 | 25.711 | 2/24/2011 01:35:01 | 25.054 |
| 2/27/2011 19:46:01 | 25.399 | 2/24/2011 01:55:01 | 25.054 |
| 2/27/2011 20:06:01 | 25.211 | 2/24/2011 02:15:01 | 25.054 |
| 2/27/2011 20:26:01 | 25.149 | 2/24/2011 02:35:01 | 25.054 |
| 2/27/2011 20:46:01 | 25.211 | 2/24/2011 02:55:01 | 24.992 |
| 2/27/2011 21:06:01 | 25.461 | 2/24/2011 03:15:01 | 24.992 |
| 2/27/2011 21:26:01 | 25.649 | 2/24/2011 03:35:01 | 24.992 |
| 2/27/2011 21:46:01 | 25.649 | 2/24/2011 03:55:01 | 24.992 |
| 2/27/2011 22:06:01 | 25.649 | 2/24/2011 04:15:01 | 24.929 |
| 2/27/2011 22:26:01 | 25.586 | 2/24/2011 04:35:01 | 24.929 |
| 2/27/2011 22:46:01 | 25.461 | 2/24/2011 04:55:01 | 24.929 |
| 2/27/2011 23:06:01 | 25.336 | 2/24/2011 05:15:01 | 24.867 |
| 2/27/2011 23:26:01 | 25.211 | 2/24/2011 05:35:01 | 24.867 |
| 2/27/2011 23:46:01 | 25.086 | 2/24/2011 05:55:01 | 24.867 |
| 2/28/2011 00:06:01 | 25.024 | 2/24/2011 06:15:01 | 24.867 |



|                    |        |                    |        |
|--------------------|--------|--------------------|--------|
| 2/28/2011 00:26:01 | 24.899 | 2/24/2011 06:35:01 | 24.804 |
| 2/28/2011 00:46:01 | 24.774 | 2/24/2011 06:55:01 | 24.804 |
| 2/28/2011 01:06:01 | 24.648 | 2/24/2011 07:15:01 | 24.804 |
| 2/28/2011 01:26:01 | 24.586 | 2/24/2011 07:35:01 | 24.804 |
| 2/28/2011 01:46:01 | 24.523 | 2/24/2011 07:55:01 | 24.804 |
| 2/28/2011 02:06:01 | 24.523 | 2/24/2011 08:15:01 | 24.742 |
| 2/28/2011 02:26:01 | 24.461 | 2/24/2011 08:35:01 | 24.742 |
| 2/28/2011 02:46:01 | 24.398 | 2/24/2011 08:55:01 | 24.742 |
| 2/28/2011 03:06:01 | 24.336 | 2/24/2011 09:15:01 | 24.742 |
| 2/28/2011 03:26:01 | 24.273 | 2/24/2011 09:35:01 | 24.679 |
| 2/28/2011 03:46:01 | 24.273 | 2/24/2011 09:55:01 | 24.679 |
| 2/28/2011 04:06:01 | 24.398 | 2/24/2011 10:15:01 | 24.679 |
| 2/28/2011 04:26:01 | 24.398 | 2/24/2011 10:35:01 | 24.679 |
| 2/28/2011 04:46:01 | 24.398 | 2/24/2011 10:55:01 | 24.679 |
| 2/28/2011 05:06:01 | 24.336 | 2/24/2011 11:15:01 | 24.679 |
| 2/28/2011 05:26:01 | 24.336 | 2/24/2011 11:35:01 | 24.679 |
| 2/28/2011 05:46:01 | 24.336 | 2/24/2011 11:55:01 | 24.742 |
| 2/28/2011 06:06:01 | 24.086 | 2/24/2011 12:15:01 | 24.742 |
| 2/28/2011 06:26:01 | 24.148 | 2/24/2011 12:35:01 | 24.742 |
| 2/28/2011 06:46:01 | 24.461 | 2/24/2011 12:55:01 | 24.804 |
| 2/28/2011 07:06:01 | 24.836 | 2/24/2011 13:15:01 | 24.804 |
| 2/28/2011 07:26:01 | 25.274 | 2/24/2011 13:35:01 | 24.867 |
| 2/28/2011 07:46:01 | 25.649 | 2/24/2011 13:55:01 | 24.867 |
| 2/28/2011 08:06:01 | 25.899 | 2/24/2011 14:15:01 | 24.867 |
| 2/28/2011 08:26:01 | 26.336 | 2/24/2011 14:35:01 | 24.929 |
| 2/28/2011 08:46:01 | 26.711 | 2/24/2011 14:55:01 | 24.929 |
| 2/28/2011 09:06:01 | 27.273 | 2/24/2011 15:15:01 | 24.929 |
| 2/28/2011 09:26:01 | 27.710 | 2/24/2011 15:35:01 | 24.992 |
| 2/28/2011 09:46:01 | 28.085 | 2/24/2011 15:55:01 | 24.992 |
| 2/28/2011 10:06:01 | 28.335 | 2/24/2011 16:15:01 | 25.054 |
| 2/28/2011 10:26:01 | 28.772 | 2/24/2011 16:35:01 | 25.054 |
| 2/28/2011 10:46:01 | 29.647 | 2/24/2011 16:55:01 | 25.054 |
| 2/28/2011 11:06:01 | 30.021 | 2/24/2011 17:15:01 | 25.117 |
| 2/28/2011 11:26:01 | 29.959 | 2/24/2011 17:35:01 | 25.117 |
| 2/28/2011 11:46:01 | 29.459 | 2/24/2011 17:55:01 | 25.117 |
| 2/28/2011 12:06:01 | 29.210 | 2/24/2011 18:15:01 | 25.179 |
| 2/28/2011 12:26:01 | 29.959 | 2/24/2011 18:35:01 | 25.179 |
| 2/28/2011 12:46:01 | 30.833 | 2/24/2011 18:55:01 | 25.179 |
| 2/28/2011 13:06:01 | 30.521 | 2/24/2011 19:15:01 | 25.179 |
| 2/28/2011 13:26:01 | 29.397 | 2/24/2011 19:35:01 | 25.242 |
| 2/28/2011 13:46:01 | 29.272 | 2/24/2011 19:55:01 | 25.242 |
| 2/28/2011 14:06:01 | 29.584 | 2/24/2011 20:15:01 | 25.242 |
| 2/28/2011 14:26:01 | 29.772 | 2/24/2011 20:35:01 | 25.242 |
| 2/28/2011 14:46:01 | 29.210 | 2/24/2011 20:55:01 | 25.242 |
| 2/28/2011 15:06:01 | 28.585 | 2/24/2011 21:15:01 | 25.242 |
| 2/28/2011 15:26:01 | 28.273 | 2/24/2011 21:35:01 | 25.242 |
| 2/28/2011 15:46:01 | 28.085 | 2/24/2011 21:55:01 | 25.242 |
| 2/28/2011 16:06:01 | 27.835 | 2/24/2011 22:15:01 | 25.242 |
| 2/28/2011 16:26:01 | 27.586 | 2/24/2011 22:35:01 | 25.242 |
| 2/28/2011 16:46:01 | 27.336 | 2/24/2011 22:55:01 | 25.242 |

|                    |        |                    |        |
|--------------------|--------|--------------------|--------|
| 2/28/2011 17:06:01 | 27.273 | 2/24/2011 23:15:01 | 25.242 |
| 2/28/2011 17:26:01 | 27.086 | 2/24/2011 23:35:01 | 25.242 |
| 2/28/2011 17:46:01 | 26.836 | 2/24/2011 23:55:01 | 25.242 |
| 2/28/2011 18:06:01 | 26.586 | 2/25/2011 00:15:01 | 25.242 |
| 2/28/2011 18:26:01 | 26.211 | 2/25/2011 00:35:01 | 25.242 |
| 2/28/2011 18:46:01 | 26.148 | 2/25/2011 00:55:01 | 25.242 |
| 2/28/2011 19:06:01 | 25.399 | 2/25/2011 01:15:01 | 25.242 |
| 2/28/2011 19:26:01 | 24.648 | 2/25/2011 01:35:01 | 25.242 |
| 2/28/2011 19:46:01 | 24.336 | 2/25/2011 01:55:01 | 25.242 |
| 2/28/2011 20:06:01 | 24.211 | 2/25/2011 02:15:01 | 25.242 |
| 2/28/2011 20:26:01 | 24.211 | 2/25/2011 02:35:01 | 25.242 |
| 2/28/2011 20:46:01 | 24.398 | 2/25/2011 02:55:01 | 25.242 |
| 2/28/2011 21:06:01 | 24.336 | 2/25/2011 03:15:01 | 25.179 |
| 2/28/2011 21:26:01 | 24.023 | 2/25/2011 03:35:01 | 25.179 |
| 2/28/2011 21:46:01 | 23.773 | 2/25/2011 03:55:01 | 25.179 |
| 2/28/2011 22:06:01 | 23.523 | 2/25/2011 04:15:01 | 25.179 |
| 2/28/2011 22:26:01 | 23.273 | 2/25/2011 04:35:01 | 25.179 |
| 2/28/2011 22:46:01 | 23.148 | 2/25/2011 04:55:01 | 25.179 |
| 2/28/2011 23:06:01 | 23.086 | 2/25/2011 05:15:01 | 25.179 |
| 2/28/2011 23:26:01 | 23.148 | 2/25/2011 05:35:01 | 25.179 |
| 2/28/2011 23:46:01 | 23.273 | 2/25/2011 05:55:01 | 25.117 |
| 3/1/2011 00:06:01  | 23.336 | 2/25/2011 06:15:01 | 25.117 |
| 3/1/2011 00:26:01  | 23.273 | 2/25/2011 06:35:01 | 25.117 |
| 3/1/2011 00:46:01  | 23.398 | 2/25/2011 06:55:01 | 25.117 |
| 3/1/2011 01:06:01  | 23.398 | 2/25/2011 07:15:01 | 25.117 |
| 3/1/2011 01:26:01  | 23.523 | 2/25/2011 07:35:01 | 25.054 |
| 3/1/2011 01:46:01  | 23.586 | 2/25/2011 07:55:01 | 25.054 |
| 3/1/2011 02:06:01  | 23.711 | 2/25/2011 08:15:01 | 25.054 |
| 3/1/2011 02:26:01  | 23.711 | 2/25/2011 08:35:01 | 25.054 |
| 3/1/2011 02:46:01  | 23.586 | 2/25/2011 08:55:01 | 25.054 |
| 3/1/2011 03:06:01  | 23.461 | 2/25/2011 09:15:01 | 24.992 |
| 3/1/2011 03:26:01  | 23.398 | 2/25/2011 09:35:01 | 24.992 |
| 3/1/2011 03:46:01  | 23.211 | 2/25/2011 09:55:01 | 24.992 |
| 3/1/2011 04:06:01  | 23.023 | 2/25/2011 10:15:01 | 24.992 |
| 3/1/2011 04:26:01  | 22.898 | 2/25/2011 10:35:01 | 24.992 |
| 3/1/2011 04:46:01  | 22.710 | 2/25/2011 10:55:01 | 24.992 |
| 3/1/2011 05:06:01  | 22.460 | 2/25/2011 11:15:01 | 24.929 |
| 3/1/2011 05:26:01  | 22.210 | 2/25/2011 11:35:01 | 24.992 |
| 3/1/2011 05:46:01  | 22.022 | 2/25/2011 11:55:01 | 24.992 |
| 3/1/2011 06:06:01  | 21.960 | 2/25/2011 12:15:01 | 24.992 |
| 3/1/2011 06:26:01  | 22.022 | 2/25/2011 12:35:01 | 24.992 |
| 3/1/2011 06:46:01  | 22.585 | 2/25/2011 12:55:01 | 24.992 |
| 3/1/2011 07:06:01  | 23.023 | 2/25/2011 13:15:01 | 24.992 |
| 3/1/2011 07:26:01  | 23.523 | 2/25/2011 13:35:01 | 24.992 |
| 3/1/2011 07:46:01  | 24.336 | 2/25/2011 13:55:01 | 25.054 |
| 3/1/2011 08:06:01  | 24.711 | 2/25/2011 14:15:01 | 25.054 |
| 3/1/2011 08:26:01  | 25.649 | 2/25/2011 14:35:01 | 25.054 |
| 3/1/2011 08:46:01  | 26.273 | 2/25/2011 14:55:01 | 25.054 |
| 3/1/2011 09:06:01  | 26.773 | 2/25/2011 15:15:01 | 25.117 |
| 3/1/2011 09:26:01  | 27.461 | 2/25/2011 15:35:01 | 25.117 |

|                   |        |                    |        |
|-------------------|--------|--------------------|--------|
| 3/1/2011 09:46:01 | 27.586 | 2/25/2011 15:55:01 | 25.117 |
| 3/1/2011 10:06:01 | 27.398 | 2/25/2011 16:15:01 | 25.117 |
| 3/1/2011 10:26:01 | 27.710 | 2/25/2011 16:35:01 | 25.179 |
| 3/1/2011 10:46:01 | 29.334 | 2/25/2011 16:55:01 | 25.179 |
| 3/1/2011 11:06:01 | 29.085 | 2/25/2011 17:15:01 | 25.179 |
| 3/1/2011 11:26:01 | 29.459 | 2/25/2011 17:35:01 | 25.179 |
| 3/1/2011 11:46:01 | 29.584 | 2/25/2011 17:55:01 | 25.242 |
| 3/1/2011 12:06:01 | 29.896 | 2/25/2011 18:15:01 | 25.242 |
| 3/1/2011 12:26:01 | 31.395 | 2/25/2011 18:35:01 | 25.242 |
| 3/1/2011 12:46:01 | 31.832 | 2/25/2011 18:55:01 | 25.242 |
| 3/1/2011 13:06:01 | 32.394 | 2/25/2011 19:15:01 | 25.242 |
| 3/1/2011 13:26:01 | 32.518 | 2/25/2011 19:35:01 | 25.242 |
| 3/1/2011 13:46:01 | 31.894 | 2/25/2011 19:55:01 | 25.242 |
| 3/1/2011 14:06:01 | 32.456 | 2/25/2011 20:15:01 | 25.242 |
| 3/1/2011 14:26:01 | 32.643 | 2/25/2011 20:35:01 | 25.242 |
| 3/1/2011 14:46:01 | 32.331 | 2/25/2011 20:55:01 | 25.242 |
| 3/1/2011 15:06:01 | 31.520 | 2/25/2011 21:15:01 | 25.242 |
| 3/1/2011 15:26:01 | 31.832 | 2/25/2011 21:35:01 | 25.242 |
| 3/1/2011 15:46:01 | 30.334 | 2/25/2011 21:55:01 | 25.242 |
| 3/1/2011 16:06:01 | 30.521 | 2/25/2011 22:15:01 | 25.242 |
| 3/1/2011 16:26:01 | 29.459 | 2/25/2011 22:35:01 | 25.242 |
| 3/1/2011 16:46:01 | 28.398 | 2/25/2011 22:55:01 | 25.242 |
| 3/1/2011 17:06:01 | 27.960 | 2/25/2011 23:15:01 | 25.242 |
| 3/1/2011 17:26:01 | 27.586 | 2/25/2011 23:35:01 | 25.242 |
| 3/1/2011 17:46:01 | 27.461 | 2/25/2011 23:55:01 | 25.242 |
| 3/1/2011 18:06:01 | 27.273 | 2/26/2011 00:15:01 | 25.242 |
| 3/1/2011 18:26:01 | 26.898 | 2/26/2011 00:35:01 | 25.242 |
| 3/1/2011 18:46:01 | 26.586 | 2/26/2011 00:55:01 | 25.179 |
| 3/1/2011 19:06:01 | 26.336 | 2/26/2011 01:15:01 | 25.179 |
| 3/1/2011 19:26:01 | 26.024 | 2/26/2011 01:35:01 | 25.179 |
| 3/1/2011 19:46:01 | 25.836 | 2/26/2011 01:55:01 | 25.179 |
| 3/1/2011 20:06:01 | 25.586 | 2/26/2011 02:15:01 | 25.179 |
| 3/1/2011 20:26:01 | 25.399 | 2/26/2011 02:35:01 | 25.179 |
| 3/1/2011 20:46:01 | 25.274 | 2/26/2011 02:55:01 | 25.117 |
| 3/1/2011 21:06:01 | 25.149 | 2/26/2011 03:15:01 | 25.117 |
| 3/1/2011 21:26:01 | 25.086 | 2/26/2011 03:35:01 | 25.117 |
| 3/1/2011 21:46:01 | 24.961 | 2/26/2011 03:55:01 | 25.117 |
| 3/1/2011 22:06:01 | 25.086 | 2/26/2011 04:15:01 | 25.117 |
| 3/1/2011 22:26:01 | 25.149 | 2/26/2011 04:35:01 | 25.117 |
| 3/1/2011 22:46:01 | 25.211 | 2/26/2011 04:55:01 | 25.117 |
| 3/1/2011 23:06:01 | 25.274 | 2/26/2011 05:15:01 | 25.054 |
| 3/1/2011 23:26:01 | 25.149 | 2/26/2011 05:35:01 | 25.054 |
| 3/1/2011 23:46:01 | 25.086 | 2/26/2011 05:55:01 | 25.054 |
| 3/2/2011 00:06:01 | 25.024 | 2/26/2011 06:15:01 | 25.054 |
| 3/2/2011 00:26:01 | 24.086 | 2/26/2011 06:35:01 | 25.054 |
| 3/2/2011 00:46:01 | 23.586 | 2/26/2011 06:55:01 | 24.992 |
| 3/2/2011 01:06:01 | 23.398 | 2/26/2011 07:15:01 | 24.992 |
| 3/2/2011 01:26:01 | 23.336 | 2/26/2011 07:35:01 | 24.992 |
| 3/2/2011 01:46:01 | 23.273 | 2/26/2011 07:55:01 | 24.992 |
| 3/2/2011 02:06:01 | 23.211 | 2/26/2011 08:15:01 | 24.992 |

|                   |        |                    |        |
|-------------------|--------|--------------------|--------|
| 3/2/2011 02:26:01 | 22.960 | 2/26/2011 08:35:01 | 24.929 |
| 3/2/2011 02:46:01 | 22.710 | 2/26/2011 08:55:01 | 24.929 |
| 3/2/2011 03:06:01 | 22.710 | 2/26/2011 09:15:01 | 24.929 |
| 3/2/2011 03:26:01 | 22.523 | 2/26/2011 09:35:01 | 24.929 |
| 3/2/2011 03:46:01 | 22.398 | 2/26/2011 09:55:01 | 24.929 |
| 3/2/2011 04:06:01 | 22.398 | 2/26/2011 10:15:01 | 24.929 |
| 3/2/2011 04:26:01 | 22.335 | 2/26/2011 10:35:01 | 24.867 |
| 3/2/2011 04:46:01 | 22.398 | 2/26/2011 10:55:01 | 24.867 |
| 3/2/2011 05:06:01 | 22.398 | 2/26/2011 11:15:01 | 24.867 |
| 3/2/2011 05:26:01 | 22.460 | 2/26/2011 11:35:01 | 24.867 |
| 3/2/2011 05:46:01 | 22.585 | 2/26/2011 11:55:01 | 24.867 |
| 3/2/2011 06:06:01 | 22.585 | 2/26/2011 12:15:01 | 24.867 |
| 3/2/2011 06:26:01 | 22.648 | 2/26/2011 12:35:01 | 24.929 |
| 3/2/2011 06:46:01 | 22.773 | 2/26/2011 12:55:01 | 24.929 |
| 3/2/2011 07:06:01 | 23.086 | 2/26/2011 13:15:01 | 24.929 |
| 3/2/2011 07:26:01 | 23.398 | 2/26/2011 13:35:01 | 24.929 |
| 3/2/2011 07:46:01 | 23.648 | 2/26/2011 13:55:01 | 24.929 |
| 3/2/2011 08:06:01 | 24.023 | 2/26/2011 14:15:01 | 24.992 |
| 3/2/2011 08:26:01 | 24.648 | 2/26/2011 14:35:01 | 24.992 |
| 3/2/2011 08:46:01 | 24.961 | 2/26/2011 14:55:01 | 24.992 |
| 3/2/2011 09:06:01 | 25.524 | 2/26/2011 15:15:01 | 24.992 |
| 3/2/2011 09:26:01 | 25.836 | 2/26/2011 15:35:01 | 25.054 |
| 3/2/2011 09:46:01 | 26.461 | 2/26/2011 15:55:01 | 25.054 |
| 3/2/2011 10:06:01 | 26.586 | 2/26/2011 16:15:01 | 25.054 |
| 3/2/2011 10:26:01 | 27.148 | 2/26/2011 16:35:01 | 25.117 |
| 3/2/2011 10:46:01 | 27.710 | 2/26/2011 16:55:01 | 25.117 |
| 3/2/2011 11:06:01 | 28.710 | 2/26/2011 17:15:01 | 25.117 |
| 3/2/2011 11:26:01 | 29.334 | 2/26/2011 17:35:01 | 25.179 |
| 3/2/2011 11:46:01 | 29.085 | 2/26/2011 17:55:01 | 25.179 |
| 3/2/2011 12:06:01 | 29.709 | 2/26/2011 18:15:01 | 25.179 |
| 3/2/2011 12:26:01 | 29.584 | 2/26/2011 18:35:01 | 25.179 |
| 3/2/2011 12:46:01 | 29.272 | 2/26/2011 18:55:01 | 25.179 |
| 3/2/2011 13:06:01 | 29.709 | 2/26/2011 19:15:01 | 25.242 |
| 3/2/2011 13:26:01 | 29.834 | 2/26/2011 19:35:01 | 25.242 |
| 3/2/2011 13:46:01 | 28.585 | 2/26/2011 19:55:01 | 25.242 |
| 3/2/2011 14:06:01 | 29.210 | 2/26/2011 20:15:01 | 25.242 |
| 3/2/2011 14:26:01 | 29.397 | 2/26/2011 20:35:01 | 25.242 |
| 3/2/2011 14:46:01 | 29.647 | 2/26/2011 20:55:01 | 25.242 |
| 3/2/2011 15:06:01 | 29.896 | 2/26/2011 21:15:01 | 25.242 |
| 3/2/2011 15:26:01 | 28.710 | 2/26/2011 21:35:01 | 25.242 |
| 3/2/2011 15:46:01 | 28.335 | 2/26/2011 21:55:01 | 25.242 |
| 3/2/2011 16:06:01 | 28.273 | 2/26/2011 22:15:01 | 25.242 |
| 3/2/2011 16:26:01 | 28.585 | 2/26/2011 22:35:01 | 25.242 |
| 3/2/2011 16:46:01 | 28.647 | 2/26/2011 22:55:01 | 25.242 |
| 3/2/2011 17:06:01 | 28.273 | 2/26/2011 23:15:01 | 25.242 |
| 3/2/2011 17:26:01 | 28.023 | 2/26/2011 23:35:01 | 25.242 |
| 3/2/2011 17:46:01 | 27.586 | 2/26/2011 23:55:01 | 25.242 |
| 3/2/2011 18:06:01 | 27.086 | 2/27/2011 00:15:01 | 25.179 |
| 3/2/2011 18:26:01 | 26.523 | 2/27/2011 00:35:01 | 25.179 |
| 3/2/2011 18:46:01 | 26.024 | 2/27/2011 00:55:01 | 25.179 |

|                   |        |                    |        |
|-------------------|--------|--------------------|--------|
| 3/2/2011 19:06:01 | 25.711 | 2/27/2011 01:15:01 | 25.179 |
| 3/2/2011 19:26:01 | 25.524 | 2/27/2011 01:35:01 | 25.179 |
| 3/2/2011 19:46:01 | 25.211 | 2/27/2011 01:55:01 | 25.179 |
| 3/2/2011 20:06:01 | 25.024 | 2/27/2011 02:15:01 | 25.179 |
| 3/2/2011 20:26:01 | 24.899 | 2/27/2011 02:35:01 | 25.179 |
| 3/2/2011 20:46:01 | 24.711 | 2/27/2011 02:55:01 | 25.117 |
| 3/2/2011 21:06:01 | 24.523 | 2/27/2011 03:15:01 | 25.117 |
| 3/2/2011 21:26:01 | 24.523 | 2/27/2011 03:35:01 | 25.117 |
| 3/2/2011 21:46:01 | 24.836 | 2/27/2011 03:55:01 | 25.117 |
| 3/2/2011 22:06:01 | 24.961 | 2/27/2011 04:15:01 | 25.117 |
| 3/2/2011 22:26:01 | 24.711 | 2/27/2011 04:35:01 | 25.054 |
| 3/2/2011 22:46:01 | 24.523 | 2/27/2011 04:55:01 | 25.054 |
| 3/2/2011 23:06:01 | 23.961 | 2/27/2011 05:15:01 | 25.054 |
| 3/2/2011 23:26:01 | 23.648 | 2/27/2011 05:35:01 | 25.054 |
| 3/2/2011 23:46:01 | 23.398 | 2/27/2011 05:55:01 | 24.992 |
| 3/3/2011 00:06:01 | 23.273 | 2/27/2011 06:15:01 | 24.992 |
| 3/3/2011 00:26:01 | 23.336 | 2/27/2011 06:35:01 | 24.992 |
| 3/3/2011 00:46:01 | 23.398 | 2/27/2011 06:55:01 | 24.992 |
| 3/3/2011 01:06:01 | 23.398 | 2/27/2011 07:15:01 | 24.929 |
| 3/3/2011 01:26:01 | 23.336 | 2/27/2011 07:35:01 | 24.929 |
| 3/3/2011 01:46:01 | 23.211 | 2/27/2011 07:55:01 | 24.929 |
| 3/3/2011 02:06:01 | 23.148 | 2/27/2011 08:15:01 | 24.867 |
| 3/3/2011 02:26:01 | 23.086 | 2/27/2011 08:35:01 | 24.867 |
| 3/3/2011 02:46:01 | 23.086 | 2/27/2011 08:55:01 | 24.867 |
| 3/3/2011 03:06:01 | 23.023 | 2/27/2011 09:15:01 | 24.867 |
| 3/3/2011 03:26:01 | 23.086 | 2/27/2011 09:35:01 | 24.867 |
| 3/3/2011 03:46:01 | 23.023 | 2/27/2011 09:55:01 | 24.867 |
| 3/3/2011 04:06:01 | 23.023 | 2/27/2011 10:15:01 | 24.804 |
| 3/3/2011 04:26:01 | 23.023 | 2/27/2011 10:35:01 | 24.804 |
| 3/3/2011 04:46:01 | 22.960 | 2/27/2011 10:55:01 | 24.804 |
| 3/3/2011 05:06:01 | 22.898 | 2/27/2011 11:15:01 | 24.804 |
| 3/3/2011 05:26:01 | 22.835 | 2/27/2011 11:35:01 | 24.804 |
| 3/3/2011 05:46:01 | 22.835 | 2/27/2011 11:55:01 | 24.867 |
| 3/3/2011 06:06:01 | 22.710 | 2/27/2011 12:15:01 | 24.867 |
| 3/3/2011 06:26:01 | 22.835 | 2/27/2011 12:35:01 | 24.867 |
| 3/3/2011 06:46:01 | 23.336 | 2/27/2011 12:55:01 | 24.929 |
| 3/3/2011 07:06:01 | 23.773 | 2/27/2011 13:15:01 | 24.929 |
| 3/3/2011 07:26:01 | 24.398 | 2/27/2011 13:35:01 | 24.929 |
| 3/3/2011 07:46:01 | 24.648 | 2/27/2011 13:55:01 | 24.929 |
| 3/3/2011 08:06:01 | 24.836 | 2/27/2011 14:15:01 | 24.992 |
| 3/3/2011 08:26:01 | 25.149 | 2/27/2011 14:35:01 | 24.992 |
| 3/3/2011 08:46:01 | 25.461 | 2/27/2011 14:55:01 | 24.992 |
| 3/3/2011 09:06:01 | 25.711 | 2/27/2011 15:15:01 | 25.054 |
| 3/3/2011 09:26:01 | 26.773 | 2/27/2011 15:35:01 | 25.054 |
| 3/3/2011 09:46:01 | 27.586 | 2/27/2011 15:55:01 | 25.054 |
| 3/3/2011 10:06:01 | 27.461 | 2/27/2011 16:15:01 | 25.117 |
| 3/3/2011 10:26:01 | 27.086 | 2/27/2011 16:35:01 | 25.117 |
| 3/3/2011 10:46:01 | 26.773 | 2/27/2011 16:55:01 | 25.117 |
| 3/3/2011 11:06:01 | 26.961 | 2/27/2011 17:15:01 | 25.117 |
| 3/3/2011 11:26:01 | 27.586 | 2/27/2011 17:35:01 | 25.179 |

|                   |        |                    |        |
|-------------------|--------|--------------------|--------|
| 3/3/2011 11:46:01 | 29.334 | 2/27/2011 17:55:01 | 25.179 |
| 3/3/2011 12:06:01 | 28.897 | 2/27/2011 18:15:01 | 25.179 |
| 3/3/2011 12:26:01 | 27.523 | 2/27/2011 18:35:01 | 25.179 |
| 3/3/2011 12:46:01 | 28.335 | 2/27/2011 18:55:01 | 25.242 |
| 3/3/2011 13:06:01 | 27.835 | 2/27/2011 19:15:01 | 25.242 |
| 3/3/2011 13:26:01 | 27.211 | 2/27/2011 19:35:01 | 25.242 |
| 3/3/2011 13:46:01 | 27.586 | 2/27/2011 19:55:01 | 25.242 |
| 3/3/2011 14:06:01 | 27.648 | 2/27/2011 20:15:01 | 25.242 |
| 3/3/2011 14:26:01 | 28.273 | 2/27/2011 20:35:01 | 25.242 |
| 3/3/2011 14:46:01 | 28.647 | 2/27/2011 20:55:01 | 25.304 |
| 3/3/2011 15:06:01 | 27.835 | 2/27/2011 21:15:01 | 25.304 |
| 3/3/2011 15:26:01 | 27.461 | 2/27/2011 21:35:01 | 25.304 |
| 3/3/2011 15:46:01 | 27.211 | 2/27/2011 21:55:01 | 25.304 |
| 3/3/2011 16:06:01 | 27.273 | 2/27/2011 22:15:01 | 25.304 |
| 3/3/2011 16:26:01 | 27.398 | 2/27/2011 22:35:01 | 25.304 |
| 3/3/2011 16:46:01 | 27.211 | 2/27/2011 22:55:01 | 25.304 |
| 3/3/2011 17:06:01 | 27.023 | 2/27/2011 23:15:01 | 25.304 |
| 3/3/2011 17:26:01 | 27.023 | 2/27/2011 23:35:01 | 25.304 |
| 3/3/2011 17:46:01 | 27.086 | 2/27/2011 23:55:01 | 25.304 |
| 3/3/2011 18:06:01 | 26.523 | 2/28/2011 00:15:01 | 25.304 |
| 3/3/2011 18:26:01 | 25.399 | 2/28/2011 00:35:01 | 25.304 |
| 3/3/2011 18:46:01 | 24.648 | 2/28/2011 00:55:01 | 25.304 |
| 3/3/2011 19:06:01 | 24.211 | 2/28/2011 01:15:01 | 25.304 |
| 3/3/2011 19:26:01 | 23.961 | 2/28/2011 01:35:01 | 25.304 |
| 3/3/2011 19:46:01 | 23.773 | 2/28/2011 01:55:01 | 25.242 |
| 3/3/2011 20:06:01 | 23.648 | 2/28/2011 02:15:01 | 25.304 |
| 3/3/2011 20:26:01 | 23.586 | 2/28/2011 02:35:01 | 25.242 |
| 3/3/2011 20:46:01 | 23.523 | 2/28/2011 02:55:01 | 25.242 |
| 3/3/2011 21:06:01 | 23.523 | 2/28/2011 03:15:01 | 25.242 |
| 3/3/2011 21:26:01 | 23.461 | 2/28/2011 03:35:01 | 25.242 |
| 3/3/2011 21:46:01 | 23.398 | 2/28/2011 03:55:01 | 25.242 |
| 3/3/2011 22:06:01 | 23.273 | 2/28/2011 04:15:01 | 25.242 |
| 3/3/2011 22:26:01 | 23.273 | 2/28/2011 04:35:01 | 25.242 |
| 3/3/2011 22:46:01 | 23.273 | 2/28/2011 04:55:01 | 25.242 |
| 3/3/2011 23:06:01 | 23.461 | 2/28/2011 05:15:01 | 25.242 |
| 3/3/2011 23:26:01 | 23.523 | 2/28/2011 05:35:01 | 25.242 |
| 3/3/2011 23:46:01 | 23.586 | 2/28/2011 05:55:01 | 25.179 |
| 3/4/2011 00:06:01 | 23.586 | 2/28/2011 06:15:01 | 25.179 |
| 3/4/2011 00:26:01 | 23.648 | 2/28/2011 06:35:01 | 25.179 |
| 3/4/2011 00:46:01 | 23.773 | 2/28/2011 06:55:01 | 25.179 |
| 3/4/2011 01:06:01 | 23.961 | 2/28/2011 07:15:01 | 25.179 |
| 3/4/2011 01:26:01 | 23.898 | 2/28/2011 07:35:01 | 25.179 |
| 3/4/2011 01:46:01 | 23.836 | 2/28/2011 07:55:01 | 25.179 |
| 3/4/2011 02:06:01 | 23.773 | 2/28/2011 08:15:01 | 25.179 |
| 3/4/2011 02:26:01 | 23.648 | 2/28/2011 08:35:01 | 25.179 |
| 3/4/2011 02:46:01 | 23.523 | 2/28/2011 08:55:01 | 25.117 |
| 3/4/2011 03:06:01 | 23.398 | 2/28/2011 09:15:01 | 25.117 |
| 3/4/2011 03:26:01 | 23.211 | 2/28/2011 09:35:01 | 25.117 |
| 3/4/2011 03:46:01 | 22.960 | 2/28/2011 09:55:01 | 25.117 |
| 3/4/2011 04:06:01 | 22.773 | 2/28/2011 10:15:01 | 25.117 |

|                   |        |                    |        |
|-------------------|--------|--------------------|--------|
| 3/4/2011 04:26:01 | 22.585 | 2/28/2011 10:35:01 | 25.117 |
| 3/4/2011 04:46:01 | 22.398 | 2/28/2011 10:55:01 | 25.117 |
| 3/4/2011 05:06:01 | 22.335 | 2/28/2011 11:15:01 | 25.117 |
| 3/4/2011 05:26:01 | 22.210 | 2/28/2011 11:35:01 | 25.117 |
| 3/4/2011 05:46:01 | 22.085 | 2/28/2011 11:55:01 | 25.179 |
| 3/4/2011 06:06:01 | 22.273 | 2/28/2011 12:15:01 | 25.179 |
| 3/4/2011 06:26:01 | 22.585 | 2/28/2011 12:35:01 | 25.179 |
| 3/4/2011 06:46:01 | 23.023 | 2/28/2011 12:55:01 | 25.179 |
| 3/4/2011 07:06:01 | 23.461 | 2/28/2011 13:15:01 | 25.242 |
| 3/4/2011 07:26:01 | 24.148 | 2/28/2011 13:35:01 | 25.242 |
| 3/4/2011 07:46:01 | 24.648 | 2/28/2011 13:55:01 | 25.242 |
| 3/4/2011 08:06:01 | 25.399 | 2/28/2011 14:15:01 | 25.242 |
| 3/4/2011 08:26:01 | 26.148 | 2/28/2011 14:35:01 | 25.304 |
| 3/4/2011 08:46:01 | 26.523 | 2/28/2011 14:55:01 | 25.304 |
| 3/4/2011 09:06:01 | 26.961 | 2/28/2011 15:15:01 | 25.304 |
| 3/4/2011 09:26:01 | 27.523 | 2/28/2011 15:35:01 | 25.367 |
| 3/4/2011 09:46:01 | 27.835 | 2/28/2011 15:55:01 | 25.367 |
| 3/4/2011 10:06:01 | 28.460 | 2/28/2011 16:15:01 | 25.367 |
| 3/4/2011 10:26:01 | 29.147 | 2/28/2011 16:35:01 | 25.367 |
| 3/4/2011 10:46:01 | 29.272 | 2/28/2011 16:55:01 | 25.429 |
| 3/4/2011 11:06:01 | 29.709 | 2/28/2011 17:15:01 | 25.429 |
| 3/4/2011 11:26:01 | 28.710 | 2/28/2011 17:35:01 | 25.429 |
| 3/4/2011 11:46:01 | 30.084 | 2/28/2011 17:55:01 | 25.492 |
| 3/4/2011 12:06:01 | 30.021 | 2/28/2011 18:15:01 | 25.492 |
| 3/4/2011 12:26:01 | 30.958 | 2/28/2011 18:35:01 | 25.492 |
| 3/4/2011 12:46:01 | 30.146 | 2/28/2011 18:55:01 | 25.492 |
| 3/4/2011 13:06:01 | 29.022 | 2/28/2011 19:15:01 | 25.492 |
| 3/4/2011 13:26:01 | 29.210 | 2/28/2011 19:35:01 | 25.492 |
| 3/4/2011 13:46:01 | 28.585 | 2/28/2011 19:55:01 | 25.492 |
| 3/4/2011 14:06:01 | 29.584 | 2/28/2011 20:15:01 | 25.492 |
| 3/4/2011 14:26:01 | 31.145 | 2/28/2011 20:35:01 | 25.492 |
| 3/4/2011 14:46:01 | 31.582 | 2/28/2011 20:55:01 | 25.492 |
| 3/4/2011 15:06:01 | 31.145 | 2/28/2011 21:15:01 | 25.492 |
| 3/4/2011 15:26:01 | 29.709 | 2/28/2011 21:35:01 | 25.492 |
| 3/4/2011 15:46:01 | 29.584 | 2/28/2011 21:55:01 | 25.492 |
| 3/4/2011 16:06:01 | 28.897 | 2/28/2011 22:15:01 | 25.492 |
| 3/4/2011 16:26:01 | 28.585 | 2/28/2011 22:35:01 | 25.492 |
| 3/4/2011 16:46:01 | 27.023 | 2/28/2011 22:55:01 | 25.492 |
| 3/4/2011 17:06:01 | 24.148 | 2/28/2011 23:15:01 | 25.429 |
| 3/4/2011 17:26:01 | 24.023 | 2/28/2011 23:35:01 | 25.429 |
| 3/4/2011 17:46:01 | 24.023 | 2/28/2011 23:55:01 | 25.429 |
| 3/4/2011 18:06:01 | 24.023 | 3/1/2011 00:15:01  | 25.429 |
| 3/4/2011 18:26:01 | 24.086 | 3/1/2011 00:35:01  | 25.367 |
| 3/4/2011 18:46:01 | 24.148 | 3/1/2011 00:55:01  | 25.367 |
| 3/4/2011 19:06:01 | 24.148 | 3/1/2011 01:15:01  | 25.367 |
| 3/4/2011 19:26:01 | 24.148 | 3/1/2011 01:35:01  | 25.367 |
| 3/4/2011 19:46:01 | 24.148 | 3/1/2011 01:55:01  | 25.304 |
| 3/4/2011 20:06:01 | 24.086 | 3/1/2011 02:15:01  | 25.304 |
| 3/4/2011 20:26:01 | 24.148 | 3/1/2011 02:35:01  | 25.304 |
| 3/4/2011 20:46:01 | 23.961 | 3/1/2011 02:55:01  | 25.304 |

|                   |        |                   |        |
|-------------------|--------|-------------------|--------|
| 3/4/2011 21:06:01 | 23.773 | 3/1/2011 03:15:01 | 25.242 |
| 3/4/2011 21:26:01 | 23.836 | 3/1/2011 03:35:01 | 25.242 |
| 3/4/2011 21:46:01 | 23.773 | 3/1/2011 03:55:01 | 25.242 |
| 3/4/2011 22:06:01 | 23.711 | 3/1/2011 04:15:01 | 25.242 |
| 3/4/2011 22:26:01 | 23.648 | 3/1/2011 04:35:01 | 25.179 |
| 3/4/2011 22:46:01 | 23.648 | 3/1/2011 04:55:01 | 25.179 |
| 3/4/2011 23:06:01 | 23.648 | 3/1/2011 05:15:01 | 25.179 |
| 3/4/2011 23:26:01 | 23.648 | 3/1/2011 05:35:01 | 25.179 |
| 3/4/2011 23:46:01 | 23.648 | 3/1/2011 05:55:01 | 25.117 |
| 3/5/2011 00:06:01 | 23.711 | 3/1/2011 06:15:01 | 25.117 |
| 3/5/2011 00:26:01 | 23.773 | 3/1/2011 06:35:01 | 25.117 |
| 3/5/2011 00:46:01 | 23.773 | 3/1/2011 06:55:01 | 25.117 |
| 3/5/2011 01:06:01 | 23.836 | 3/1/2011 07:15:01 | 25.117 |
| 3/5/2011 01:26:01 | 23.648 | 3/1/2011 07:35:01 | 25.054 |
| 3/5/2011 01:46:01 | 23.523 | 3/1/2011 07:55:01 | 25.054 |
| 3/5/2011 02:06:01 | 23.711 | 3/1/2011 08:15:01 | 25.054 |
| 3/5/2011 02:26:01 | 23.836 | 3/1/2011 08:35:01 | 25.054 |
| 3/5/2011 02:46:01 | 23.836 | 3/1/2011 08:55:01 | 24.992 |
| 3/5/2011 03:06:01 | 23.836 | 3/1/2011 09:15:01 | 24.992 |
| 3/5/2011 03:26:01 | 23.711 | 3/1/2011 09:35:01 | 24.992 |
| 3/5/2011 03:46:01 | 23.648 | 3/1/2011 09:55:01 | 24.992 |
| 3/5/2011 04:06:01 | 23.648 | 3/1/2011 10:15:01 | 24.992 |
| 3/5/2011 04:26:01 | 23.586 | 3/1/2011 10:35:01 | 24.992 |
| 3/5/2011 04:46:01 | 23.523 | 3/1/2011 10:55:01 | 24.992 |
| 3/5/2011 05:06:01 | 23.586 | 3/1/2011 11:15:01 | 24.992 |
| 3/5/2011 05:26:01 | 23.586 | 3/1/2011 11:35:01 | 24.992 |
| 3/5/2011 05:46:01 | 23.586 | 3/1/2011 11:55:01 | 24.992 |
| 3/5/2011 06:06:01 | 23.586 | 3/1/2011 12:15:01 | 24.992 |
| 3/5/2011 06:26:01 | 23.523 | 3/1/2011 12:35:01 | 24.992 |
| 3/5/2011 06:46:01 | 23.711 | 3/1/2011 12:55:01 | 24.992 |
| 3/5/2011 07:06:01 | 23.898 | 3/1/2011 13:15:01 | 25.054 |
| 3/5/2011 07:26:01 | 24.023 | 3/1/2011 13:35:01 | 25.054 |
| 3/5/2011 07:46:01 | 24.336 | 3/1/2011 13:55:01 | 25.054 |
| 3/5/2011 08:06:01 | 24.586 | 3/1/2011 14:15:01 | 25.117 |
| 3/5/2011 08:26:01 | 25.024 | 3/1/2011 14:35:01 | 25.117 |
| 3/5/2011 08:46:01 | 25.336 | 3/1/2011 14:55:01 | 25.117 |
| 3/5/2011 09:06:01 | 25.649 | 3/1/2011 15:15:01 | 25.179 |
| 3/5/2011 09:26:01 | 26.024 | 3/1/2011 15:35:01 | 25.179 |
| 3/5/2011 09:46:01 | 26.398 | 3/1/2011 15:55:01 | 25.242 |
| 3/5/2011 10:06:01 | 26.773 | 3/1/2011 16:15:01 | 25.242 |
| 3/5/2011 10:26:01 | 26.648 | 3/1/2011 16:35:01 | 25.242 |
| 3/5/2011 10:46:01 | 27.336 | 3/1/2011 16:55:01 | 25.304 |
| 3/5/2011 11:06:01 | 28.148 | 3/1/2011 17:15:01 | 25.304 |
| 3/5/2011 11:26:01 | 28.148 | 3/1/2011 17:35:01 | 25.367 |
| 3/5/2011 11:46:01 | 29.272 | 3/1/2011 17:55:01 | 25.367 |
| 3/5/2011 12:06:01 | 29.334 | 3/1/2011 18:15:01 | 25.367 |
| 3/5/2011 12:26:01 | 29.210 | 3/1/2011 18:35:01 | 25.367 |
| 3/5/2011 12:46:01 | 29.397 | 3/1/2011 18:55:01 | 25.429 |
| 3/5/2011 13:06:01 | 30.146 | 3/1/2011 19:15:01 | 25.429 |
| 3/5/2011 13:26:01 | 30.895 | 3/1/2011 19:35:01 | 25.429 |



|                   |                          |        |
|-------------------|--------------------------|--------|
| 3/5/2011 13:46:01 | 30.771 3/1/2011 19:55:01 | 25.429 |
| 3/5/2011 14:06:01 | 30.458 3/1/2011 20:15:01 | 25.492 |
| 3/5/2011 14:26:01 | 30.271 3/1/2011 20:35:01 | 25.492 |
| 3/5/2011 14:46:01 | 30.396 3/1/2011 20:55:01 | 25.492 |
| 3/5/2011 15:06:01 | 30.833 3/1/2011 21:15:01 | 25.492 |
| 3/5/2011 15:26:01 | 30.334 3/1/2011 21:35:01 | 25.492 |
| 3/5/2011 15:46:01 | 29.584 3/1/2011 21:55:01 | 25.492 |
| 3/5/2011 16:06:01 | 29.085 3/1/2011 22:15:01 | 25.492 |
| 3/5/2011 16:26:01 | 28.835 3/1/2011 22:35:01 | 25.492 |
| 3/5/2011 16:46:01 | 28.398 3/1/2011 22:55:01 | 25.492 |
| 3/5/2011 17:06:01 | 27.086 3/1/2011 23:15:01 | 25.492 |
| 3/5/2011 17:26:01 | 26.773 3/1/2011 23:35:01 | 25.492 |
| 3/5/2011 17:46:01 | 26.148 3/1/2011 23:55:01 | 25.492 |
| 3/5/2011 18:06:01 | 25.961 3/2/2011 00:15:01 | 25.492 |
| 3/5/2011 18:26:01 | 25.649 3/2/2011 00:35:01 | 25.492 |
| 3/5/2011 18:46:01 | 25.274 3/2/2011 00:55:01 | 25.492 |
| 3/5/2011 19:06:01 | 25.149 3/2/2011 01:15:01 | 25.429 |
| 3/5/2011 19:26:01 | 25.149 3/2/2011 01:35:01 | 25.429 |
| 3/5/2011 19:46:01 | 25.024 3/2/2011 01:55:01 | 25.429 |
| 3/5/2011 20:06:01 | 24.961 3/2/2011 02:15:01 | 25.429 |
| 3/5/2011 20:26:01 | 24.899 3/2/2011 02:35:01 | 25.429 |
| 3/5/2011 20:46:01 | 24.836 3/2/2011 02:55:01 | 25.429 |
| 3/5/2011 21:06:01 | 24.774 3/2/2011 03:15:01 | 25.367 |
| 3/5/2011 21:26:01 | 24.711 3/2/2011 03:35:01 | 25.367 |
| 3/5/2011 21:46:01 | 24.586 3/2/2011 03:55:01 | 25.367 |
| 3/5/2011 22:06:01 | 24.586 3/2/2011 04:15:01 | 25.367 |
| 3/5/2011 22:26:01 | 24.523 3/2/2011 04:35:01 | 25.304 |
| 3/5/2011 22:46:01 | 24.586 3/2/2011 04:55:01 | 25.304 |
| 3/5/2011 23:06:01 | 24.711 3/2/2011 05:15:01 | 25.304 |
| 3/5/2011 23:26:01 | 24.711 3/2/2011 05:35:01 | 25.304 |
| 3/5/2011 23:46:01 | 24.586 3/2/2011 05:55:01 | 25.242 |
| 3/6/2011 00:06:01 | 24.148 3/2/2011 06:15:01 | 25.242 |
| 3/6/2011 00:26:01 | 23.836 3/2/2011 06:35:01 | 25.242 |
| 3/6/2011 00:46:01 | 23.523 3/2/2011 06:55:01 | 25.179 |
| 3/6/2011 01:06:01 | 23.398 3/2/2011 07:15:01 | 25.179 |
| 3/6/2011 01:26:01 | 23.336 3/2/2011 07:35:01 | 25.179 |
| 3/6/2011 01:46:01 | 23.398 3/2/2011 07:55:01 | 25.117 |
| 3/6/2011 02:06:01 | 23.336 3/2/2011 08:15:01 | 25.117 |
| 3/6/2011 02:26:01 | 23.086 3/2/2011 08:35:01 | 25.117 |
| 3/6/2011 02:46:01 | 22.648 3/2/2011 08:55:01 | 25.054 |
| 3/6/2011 03:06:01 | 22.273 3/2/2011 09:15:01 | 25.054 |
| 3/6/2011 03:26:01 | 22.085 3/2/2011 09:35:01 | 25.054 |
| 3/6/2011 03:46:01 | 22.022 3/2/2011 09:55:01 | 25.054 |
| 3/6/2011 04:06:01 | 21.897 3/2/2011 10:15:01 | 25.054 |
| 3/6/2011 04:26:01 | 21.835 3/2/2011 10:35:01 | 24.992 |
| 3/6/2011 04:46:01 | 21.772 3/2/2011 10:55:01 | 24.992 |
| 3/6/2011 05:06:01 | 21.772 3/2/2011 11:15:01 | 24.992 |
| 3/6/2011 05:26:01 | 21.647 3/2/2011 11:35:01 | 24.992 |
| 3/6/2011 05:46:01 | 21.647 3/2/2011 11:55:01 | 25.054 |
| 3/6/2011 06:06:01 | 21.710 3/2/2011 12:15:01 | 25.054 |

|                   |        |                   |        |
|-------------------|--------|-------------------|--------|
| 3/6/2011 06:26:01 | 21.710 | 3/2/2011 12:35:01 | 25.054 |
| 3/6/2011 06:46:01 | 21.897 | 3/2/2011 12:55:01 | 25.054 |
| 3/6/2011 07:06:01 | 22.335 | 3/2/2011 13:15:01 | 25.054 |
| 3/6/2011 07:26:01 | 22.773 | 3/2/2011 13:35:01 | 25.054 |
| 3/6/2011 07:46:01 | 23.086 | 3/2/2011 13:55:01 | 25.117 |
| 3/6/2011 08:06:01 | 23.398 | 3/2/2011 14:15:01 | 25.117 |
| 3/6/2011 08:26:01 | 23.836 | 3/2/2011 14:35:01 | 25.117 |
| 3/6/2011 08:46:01 | 24.211 | 3/2/2011 14:55:01 | 25.179 |
| 3/6/2011 09:06:01 | 24.711 | 3/2/2011 15:15:01 | 25.179 |
| 3/6/2011 09:26:01 | 25.149 | 3/2/2011 15:35:01 | 25.179 |
| 3/6/2011 09:46:01 | 25.586 | 3/2/2011 15:55:01 | 25.242 |
| 3/6/2011 10:06:01 | 25.899 | 3/2/2011 16:15:01 | 25.242 |
| 3/6/2011 10:26:01 | 26.336 | 3/2/2011 16:35:01 | 25.242 |
| 3/6/2011 10:46:01 | 26.398 | 3/2/2011 16:55:01 | 25.304 |
| 3/6/2011 11:06:01 | 26.711 | 3/2/2011 17:15:01 | 25.304 |
| 3/6/2011 11:26:01 | 26.898 | 3/2/2011 17:35:01 | 25.304 |
| 3/6/2011 11:46:01 | 26.961 | 3/2/2011 17:55:01 | 25.304 |
| 3/6/2011 12:06:01 | 26.961 | 3/2/2011 18:15:01 | 25.304 |
| 3/6/2011 12:26:01 | 27.086 | 3/2/2011 18:35:01 | 25.367 |
| 3/6/2011 12:46:01 | 27.148 | 3/2/2011 18:55:01 | 25.367 |
| 3/6/2011 13:06:01 | 27.086 | 3/2/2011 19:15:01 | 25.367 |
| 3/6/2011 13:26:01 | 27.398 | 3/2/2011 19:35:01 | 25.367 |
| 3/6/2011 13:46:01 | 27.273 | 3/2/2011 19:55:01 | 25.367 |
| 3/6/2011 14:06:01 | 27.835 | 3/2/2011 20:15:01 | 25.429 |
| 3/6/2011 14:26:01 | 27.835 | 3/2/2011 20:35:01 | 25.429 |
| 3/6/2011 14:46:01 | 27.710 | 3/2/2011 20:55:01 | 25.429 |
| 3/6/2011 15:06:01 | 27.523 | 3/2/2011 21:15:01 | 25.429 |
| 3/6/2011 15:26:01 | 27.336 | 3/2/2011 21:35:01 | 25.429 |
| 3/6/2011 15:46:01 | 27.086 | 3/2/2011 21:55:01 | 25.429 |
| 3/6/2011 16:06:01 | 26.961 | 3/2/2011 22:15:01 | 25.429 |
| 3/6/2011 16:26:01 | 26.961 | 3/2/2011 22:35:01 | 25.429 |
| 3/6/2011 16:46:01 | 26.898 | 3/2/2011 22:55:01 | 25.429 |
| 3/6/2011 17:06:01 | 26.648 | 3/2/2011 23:15:01 | 25.429 |
| 3/6/2011 17:26:01 | 26.148 | 3/2/2011 23:35:01 | 25.429 |
| 3/6/2011 17:46:01 | 25.961 | 3/2/2011 23:55:01 | 25.367 |
| 3/6/2011 18:06:01 | 25.774 | 3/3/2011 00:15:01 | 25.367 |
| 3/6/2011 18:26:01 | 25.524 | 3/3/2011 00:35:01 | 25.367 |
| 3/6/2011 18:46:01 | 25.399 | 3/3/2011 00:55:01 | 25.367 |
| 3/6/2011 19:06:01 | 25.211 | 3/3/2011 01:15:01 | 25.304 |
| 3/6/2011 19:26:01 | 25.086 | 3/3/2011 01:35:01 | 25.304 |
| 3/6/2011 19:46:01 | 25.024 | 3/3/2011 01:55:01 | 25.304 |
| 3/6/2011 20:06:01 | 24.961 | 3/3/2011 02:15:01 | 25.242 |
| 3/6/2011 20:26:01 | 24.836 | 3/3/2011 02:35:01 | 25.242 |
| 3/6/2011 20:46:01 | 24.774 | 3/3/2011 02:55:01 | 25.179 |
| 3/6/2011 21:06:01 | 24.648 | 3/3/2011 03:15:01 | 25.179 |
| 3/6/2011 21:26:01 | 24.523 | 3/3/2011 03:35:01 | 25.179 |
| 3/6/2011 21:46:01 | 24.461 | 3/3/2011 03:55:01 | 25.117 |
| 3/6/2011 22:06:01 | 24.398 | 3/3/2011 04:15:01 | 25.117 |
| 3/6/2011 22:26:01 | 24.273 | 3/3/2011 04:35:01 | 25.117 |
| 3/6/2011 22:46:01 | 24.336 | 3/3/2011 04:55:01 | 25.054 |

|                   |        |                   |        |
|-------------------|--------|-------------------|--------|
| 3/6/2011 23:06:01 | 24.211 | 3/3/2011 05:15:01 | 25.054 |
| 3/6/2011 23:26:01 | 24.148 | 3/3/2011 05:35:01 | 25.054 |
| 3/6/2011 23:46:01 | 24.023 | 3/3/2011 05:55:01 | 25.054 |
| 3/7/2011 00:06:01 | 24.023 | 3/3/2011 06:15:01 | 24.992 |
| 3/7/2011 00:26:01 | 24.023 | 3/3/2011 06:35:01 | 24.992 |
| 3/7/2011 00:46:01 | 23.898 | 3/3/2011 06:55:01 | 24.992 |
| 3/7/2011 01:06:01 | 23.836 | 3/3/2011 07:15:01 | 24.992 |
| 3/7/2011 01:26:01 | 23.773 | 3/3/2011 07:35:01 | 24.929 |
| 3/7/2011 01:46:01 | 23.648 | 3/3/2011 07:55:01 | 24.929 |
| 3/7/2011 02:06:01 | 23.586 | 3/3/2011 08:15:01 | 24.929 |
| 3/7/2011 02:26:01 | 23.586 | 3/3/2011 08:35:01 | 24.929 |
| 3/7/2011 02:46:01 | 23.586 | 3/3/2011 08:55:01 | 24.867 |
| 3/7/2011 03:06:01 | 23.586 | 3/3/2011 09:15:01 | 24.867 |
| 3/7/2011 03:26:01 | 23.711 | 3/3/2011 09:35:01 | 24.867 |
| 3/7/2011 03:46:01 | 23.648 | 3/3/2011 09:55:01 | 24.867 |
| 3/7/2011 04:06:01 | 23.648 | 3/3/2011 10:15:01 | 24.867 |
| 3/7/2011 04:26:01 | 23.586 | 3/3/2011 10:35:01 | 24.867 |
| 3/7/2011 04:46:01 | 23.648 | 3/3/2011 10:55:01 | 24.867 |
| 3/7/2011 05:06:01 | 23.648 | 3/3/2011 11:15:01 | 24.867 |
| 3/7/2011 05:26:01 | 23.586 | 3/3/2011 11:35:01 | 24.867 |
| 3/7/2011 05:46:01 | 23.461 | 3/3/2011 11:55:01 | 24.867 |
| 3/7/2011 06:06:01 | 23.461 | 3/3/2011 12:15:01 | 24.929 |
| 3/7/2011 06:26:01 | 23.586 | 3/3/2011 12:35:01 | 24.929 |
| 3/7/2011 06:46:01 | 23.773 | 3/3/2011 12:55:01 | 24.929 |
| 3/7/2011 07:06:01 | 23.836 | 3/3/2011 13:15:01 | 24.929 |
| 3/7/2011 07:26:01 | 24.023 | 3/3/2011 13:35:01 | 24.992 |
| 3/7/2011 07:46:01 | 24.336 | 3/3/2011 13:55:01 | 24.992 |
| 3/7/2011 08:06:01 | 24.711 | 3/3/2011 14:15:01 | 24.992 |
| 3/7/2011 08:26:01 | 24.899 | 3/3/2011 14:35:01 | 24.992 |
| 3/7/2011 08:46:01 | 25.586 | 3/3/2011 14:55:01 | 25.054 |
| 3/7/2011 09:06:01 | 26.523 | 3/3/2011 15:15:01 | 25.054 |
| 3/7/2011 09:26:01 | 27.461 | 3/3/2011 15:35:01 | 25.054 |
| 3/7/2011 09:46:01 | 28.148 | 3/3/2011 15:55:01 | 25.054 |
| 3/7/2011 10:06:01 | 28.897 | 3/3/2011 16:15:01 | 25.054 |
| 3/7/2011 10:26:01 | 29.397 | 3/3/2011 16:35:01 | 25.117 |
| 3/7/2011 10:46:01 | 29.896 | 3/3/2011 16:55:01 | 25.117 |
| 3/7/2011 11:06:01 | 30.209 | 3/3/2011 17:15:01 | 25.117 |
| 3/7/2011 11:26:01 | 30.833 | 3/3/2011 17:35:01 | 25.117 |
| 3/7/2011 11:46:01 | 31.457 | 3/3/2011 17:55:01 | 25.179 |
| 3/7/2011 12:06:01 | 30.833 | 3/3/2011 18:15:01 | 25.179 |
| 3/7/2011 12:26:01 | 31.145 | 3/3/2011 18:35:01 | 25.179 |
| 3/7/2011 12:46:01 | 31.270 | 3/3/2011 18:55:01 | 25.179 |
| 3/7/2011 13:06:01 | 30.646 | 3/3/2011 19:15:01 | 25.179 |
| 3/7/2011 13:26:01 | 30.583 | 3/3/2011 19:35:01 | 25.179 |
| 3/7/2011 13:46:01 | 31.332 | 3/3/2011 19:55:01 | 25.242 |
| 3/7/2011 14:06:01 | 30.084 | 3/3/2011 20:15:01 | 25.242 |
| 3/7/2011 14:26:01 | 30.334 | 3/3/2011 20:35:01 | 25.242 |
| 3/7/2011 14:46:01 | 31.332 | 3/3/2011 20:55:01 | 25.242 |
| 3/7/2011 15:06:01 | 30.833 | 3/3/2011 21:15:01 | 25.242 |
| 3/7/2011 15:26:01 | 30.521 | 3/3/2011 21:35:01 | 25.242 |

|                   |        |                   |        |
|-------------------|--------|-------------------|--------|
| 3/7/2011 15:46:01 | 29.584 | 3/3/2011 21:55:01 | 25.242 |
| 3/7/2011 16:06:01 | 29.647 | 3/3/2011 22:15:01 | 25.242 |
| 3/7/2011 16:26:01 | 28.772 | 3/3/2011 22:35:01 | 25.179 |
| 3/7/2011 16:46:01 | 28.273 | 3/3/2011 22:55:01 | 25.179 |
| 3/7/2011 17:06:01 | 28.085 | 3/3/2011 23:15:01 | 25.179 |
| 3/7/2011 17:26:01 | 27.523 | 3/3/2011 23:35:01 | 25.179 |
| 3/7/2011 17:46:01 | 27.211 | 3/3/2011 23:55:01 | 25.179 |
| 3/7/2011 18:06:01 | 26.523 | 3/4/2011 00:15:01 | 25.179 |
| 3/7/2011 18:26:01 | 26.024 | 3/4/2011 00:35:01 | 25.117 |
| 3/7/2011 18:46:01 | 25.524 | 3/4/2011 00:55:01 | 25.117 |
| 3/7/2011 19:06:01 | 24.961 | 3/4/2011 01:15:01 | 25.117 |
| 3/7/2011 19:26:01 | 24.648 | 3/4/2011 01:35:01 | 25.117 |
| 3/7/2011 19:46:01 | 24.398 | 3/4/2011 01:55:01 | 25.117 |
| 3/7/2011 20:06:01 | 24.273 | 3/4/2011 02:15:01 | 25.117 |
| 3/7/2011 20:26:01 | 24.336 | 3/4/2011 02:35:01 | 25.054 |
| 3/7/2011 20:46:01 | 24.461 | 3/4/2011 02:55:01 | 25.054 |
| 3/7/2011 21:06:01 | 24.398 | 3/4/2011 03:15:01 | 25.054 |
| 3/7/2011 21:26:01 | 24.273 | 3/4/2011 03:35:01 | 25.054 |
| 3/7/2011 21:46:01 | 24.211 | 3/4/2011 03:55:01 | 25.054 |
| 3/7/2011 22:06:01 | 24.273 | 3/4/2011 04:15:01 | 25.054 |
| 3/7/2011 22:26:01 | 24.398 | 3/4/2011 04:35:01 | 25.054 |
| 3/7/2011 22:46:01 | 24.398 | 3/4/2011 04:55:01 | 24.992 |
| 3/7/2011 23:06:01 | 24.461 | 3/4/2011 05:15:01 | 24.992 |
| 3/7/2011 23:26:01 | 24.461 | 3/4/2011 05:35:01 | 24.992 |
| 3/7/2011 23:46:01 | 24.398 | 3/4/2011 05:55:01 | 24.992 |
| 3/8/2011 00:06:01 | 24.148 | 3/4/2011 06:15:01 | 24.992 |
| 3/8/2011 00:26:01 | 24.086 | 3/4/2011 06:35:01 | 24.992 |
| 3/8/2011 00:46:01 | 24.086 | 3/4/2011 06:55:01 | 24.929 |
| 3/8/2011 01:06:01 | 24.086 | 3/4/2011 07:15:01 | 24.929 |
| 3/8/2011 01:26:01 | 24.148 | 3/4/2011 07:35:01 | 24.929 |
| 3/8/2011 01:46:01 | 24.023 | 3/4/2011 07:55:01 | 24.929 |
| 3/8/2011 02:06:01 | 24.148 | 3/4/2011 08:15:01 | 24.929 |
| 3/8/2011 02:26:01 | 24.148 | 3/4/2011 08:35:01 | 24.867 |
| 3/8/2011 02:46:01 | 24.148 | 3/4/2011 08:55:01 | 24.867 |
| 3/8/2011 03:06:01 | 24.023 | 3/4/2011 09:15:01 | 24.867 |
| 3/8/2011 03:26:01 | 23.836 | 3/4/2011 09:35:01 | 24.867 |
| 3/8/2011 03:46:01 | 23.836 | 3/4/2011 09:55:01 | 24.867 |
| 3/8/2011 04:06:01 | 23.773 | 3/4/2011 10:15:01 | 24.867 |
| 3/8/2011 04:26:01 | 23.586 | 3/4/2011 10:35:01 | 24.867 |
| 3/8/2011 04:46:01 | 23.461 | 3/4/2011 10:55:01 | 24.867 |
| 3/8/2011 05:06:01 | 23.398 | 3/4/2011 11:15:01 | 24.867 |
| 3/8/2011 05:26:01 | 23.336 | 3/4/2011 11:35:01 | 24.867 |
| 3/8/2011 05:46:01 | 23.273 | 3/4/2011 11:55:01 | 24.929 |
| 3/8/2011 06:06:01 | 23.148 | 3/4/2011 12:15:01 | 24.929 |
| 3/8/2011 06:26:01 | 23.211 | 3/4/2011 12:35:01 | 24.929 |
| 3/8/2011 06:46:01 | 23.586 | 3/4/2011 12:55:01 | 24.992 |
| 3/8/2011 07:06:01 | 24.648 | 3/4/2011 13:15:01 | 24.992 |
| 3/8/2011 07:26:01 | 24.211 | 3/4/2011 13:35:01 | 24.992 |
| 3/8/2011 07:46:01 | 24.336 | 3/4/2011 13:55:01 | 25.054 |
| 3/8/2011 08:06:01 | 24.398 | 3/4/2011 14:15:01 | 25.054 |

|                   |        |                   |        |
|-------------------|--------|-------------------|--------|
| 3/8/2011 08:26:01 | 25.086 | 3/4/2011 14:35:01 | 25.054 |
| 3/8/2011 08:46:01 | 25.774 | 3/4/2011 14:55:01 | 25.117 |
| 3/8/2011 09:06:01 | 26.336 | 3/4/2011 15:15:01 | 25.117 |
| 3/8/2011 09:26:01 | 26.648 | 3/4/2011 15:35:01 | 25.117 |
| 3/8/2011 09:46:01 | 26.836 | 3/4/2011 15:55:01 | 25.179 |
| 3/8/2011 10:06:01 | 26.648 | 3/4/2011 16:15:01 | 25.179 |
| 3/8/2011 10:26:01 | 26.773 | 3/4/2011 16:35:01 | 25.179 |
| 3/8/2011 10:46:01 | 26.836 | 3/4/2011 16:55:01 | 25.242 |
| 3/8/2011 11:06:01 | 26.148 | 3/4/2011 17:15:01 | 25.242 |
| 3/8/2011 11:26:01 | 25.461 | 3/4/2011 17:35:01 | 25.242 |
| 3/8/2011 11:46:01 | 24.774 | 3/4/2011 17:55:01 | 25.304 |
| 3/8/2011 12:06:01 | 24.648 | 3/4/2011 18:15:01 | 25.304 |
| 3/8/2011 12:26:01 | 24.961 | 3/4/2011 18:35:01 | 25.304 |
| 3/8/2011 12:46:01 | 25.149 | 3/4/2011 18:55:01 | 25.304 |
| 3/8/2011 13:06:01 | 25.524 | 3/4/2011 19:15:01 | 25.304 |
| 3/8/2011 13:26:01 | 25.836 | 3/4/2011 19:35:01 | 25.304 |
| 3/8/2011 13:46:01 | 25.899 | 3/4/2011 19:55:01 | 25.304 |
| 3/8/2011 14:06:01 | 26.336 | 3/4/2011 20:15:01 | 25.242 |
| 3/8/2011 14:26:01 | 26.523 | 3/4/2011 20:35:01 | 25.242 |
| 3/8/2011 14:46:01 | 26.523 | 3/4/2011 20:55:01 | 25.242 |
| 3/8/2011 15:06:01 | 26.711 | 3/4/2011 21:15:01 | 25.242 |
| 3/8/2011 15:26:01 | 26.586 | 3/4/2011 21:35:01 | 25.242 |
| 3/8/2011 15:46:01 | 26.773 | 3/4/2011 21:55:01 | 25.242 |
| 3/8/2011 16:06:01 | 27.148 | 3/4/2011 22:15:01 | 25.179 |
| 3/8/2011 16:26:01 | 27.086 | 3/4/2011 22:35:01 | 25.179 |
| 3/8/2011 16:46:01 | 26.586 | 3/4/2011 22:55:01 | 25.179 |
| 3/8/2011 17:06:01 | 26.336 | 3/4/2011 23:15:01 | 25.179 |
| 3/8/2011 17:26:01 | 26.148 | 3/4/2011 23:35:01 | 25.179 |
| 3/8/2011 17:46:01 | 25.899 | 3/4/2011 23:55:01 | 25.179 |
| 3/8/2011 18:06:01 | 25.649 | 3/5/2011 00:15:01 | 25.117 |
| 3/8/2011 18:26:01 | 25.149 | 3/5/2011 00:35:01 | 25.117 |
| 3/8/2011 18:46:01 | 24.836 | 3/5/2011 00:55:01 | 25.117 |
| 3/8/2011 19:06:01 | 24.523 | 3/5/2011 01:15:01 | 25.117 |
| 3/8/2011 19:26:01 | 24.273 | 3/5/2011 01:35:01 | 25.117 |
| 3/8/2011 19:46:01 | 24.273 | 3/5/2011 01:55:01 | 25.054 |
| 3/8/2011 20:06:01 | 24.273 | 3/5/2011 02:15:01 | 25.054 |
| 3/8/2011 20:26:01 | 24.273 | 3/5/2011 02:35:01 | 25.054 |
| 3/8/2011 20:46:01 | 24.086 | 3/5/2011 02:55:01 | 25.054 |
| 3/8/2011 21:06:01 | 24.023 | 3/5/2011 03:15:01 | 25.054 |
| 3/8/2011 21:26:01 | 24.086 | 3/5/2011 03:35:01 | 25.054 |
| 3/8/2011 21:46:01 | 24.023 | 3/5/2011 03:55:01 | 25.054 |
| 3/8/2011 22:06:01 | 23.898 | 3/5/2011 04:15:01 | 25.054 |
| 3/8/2011 22:26:01 | 23.711 | 3/5/2011 04:35:01 | 24.992 |
| 3/8/2011 22:46:01 | 23.523 | 3/5/2011 04:55:01 | 24.992 |
| 3/8/2011 23:06:01 | 23.398 | 3/5/2011 05:15:01 | 24.992 |
| 3/8/2011 23:26:01 | 23.398 | 3/5/2011 05:35:01 | 24.992 |
| 3/8/2011 23:46:01 | 23.211 | 3/5/2011 05:55:01 | 24.992 |
| 3/9/2011 00:06:01 | 23.148 | 3/5/2011 06:15:01 | 24.992 |
| 3/9/2011 00:26:01 | 23.086 | 3/5/2011 06:35:01 | 24.929 |
| 3/9/2011 00:46:01 | 23.148 | 3/5/2011 06:55:01 | 24.929 |

|                   |        |                   |        |
|-------------------|--------|-------------------|--------|
| 3/9/2011 01:06:01 | 23.148 | 3/5/2011 07:15:01 | 24.929 |
| 3/9/2011 01:26:01 | 23.086 | 3/5/2011 07:35:01 | 24.929 |
| 3/9/2011 01:46:01 | 22.960 | 3/5/2011 07:55:01 | 24.929 |
| 3/9/2011 02:06:01 | 22.960 | 3/5/2011 08:15:01 | 24.929 |
| 3/9/2011 02:26:01 | 23.148 | 3/5/2011 08:35:01 | 24.929 |
| 3/9/2011 02:46:01 | 23.273 | 3/5/2011 08:55:01 | 24.929 |
| 3/9/2011 03:06:01 | 23.461 | 3/5/2011 09:15:01 | 24.867 |
| 3/9/2011 03:26:01 | 23.523 | 3/5/2011 09:35:01 | 24.867 |
| 3/9/2011 03:46:01 | 23.398 | 3/5/2011 09:55:01 | 24.867 |
| 3/9/2011 04:06:01 | 23.461 | 3/5/2011 10:15:01 | 24.867 |
| 3/9/2011 04:26:01 | 23.461 | 3/5/2011 10:35:01 | 24.867 |
| 3/9/2011 04:46:01 | 23.461 | 3/5/2011 10:55:01 | 24.867 |
| 3/9/2011 05:06:01 | 23.148 | 3/5/2011 11:15:01 | 24.867 |
| 3/9/2011 05:26:01 | 22.960 | 3/5/2011 11:35:01 | 24.867 |
| 3/9/2011 05:46:01 | 22.773 | 3/5/2011 11:55:01 | 24.929 |
| 3/9/2011 06:06:01 | 22.648 | 3/5/2011 12:15:01 | 24.929 |
| 3/9/2011 06:26:01 | 22.835 | 3/5/2011 12:35:01 | 24.929 |
| 3/9/2011 06:46:01 | 23.336 | 3/5/2011 12:55:01 | 24.929 |
| 3/9/2011 07:06:01 | 23.898 | 3/5/2011 13:15:01 | 24.992 |
| 3/9/2011 07:26:01 | 24.211 | 3/5/2011 13:35:01 | 24.992 |
| 3/9/2011 07:46:01 | 24.273 | 3/5/2011 13:55:01 | 24.992 |
| 3/9/2011 08:06:01 | 24.273 | 3/5/2011 14:15:01 | 24.992 |
| 3/9/2011 08:26:01 | 25.461 | 3/5/2011 14:35:01 | 25.054 |
| 3/9/2011 08:46:01 | 26.336 | 3/5/2011 14:55:01 | 25.054 |
| 3/9/2011 09:06:01 | 26.961 | 3/5/2011 15:15:01 | 25.117 |
| 3/9/2011 09:26:01 | 27.523 | 3/5/2011 15:35:01 | 25.117 |
| 3/9/2011 09:46:01 | 27.898 | 3/5/2011 15:55:01 | 25.117 |
| 3/9/2011 10:06:01 | 28.398 | 3/5/2011 16:15:01 | 25.179 |
| 3/9/2011 10:26:01 | 28.647 | 3/5/2011 16:35:01 | 25.179 |
| 3/9/2011 10:46:01 | 29.210 | 3/5/2011 16:55:01 | 25.179 |
| 3/9/2011 11:06:01 | 29.834 | 3/5/2011 17:15:01 | 25.242 |
| 3/9/2011 11:26:01 | 30.146 | 3/5/2011 17:35:01 | 25.242 |
| 3/9/2011 11:46:01 | 30.146 | 3/5/2011 17:55:01 | 25.242 |
| 3/9/2011 12:06:01 | 30.334 | 3/5/2011 18:15:01 | 25.304 |
| 3/9/2011 12:26:01 | 31.332 | 3/5/2011 18:35:01 | 25.304 |
| 3/9/2011 12:46:01 | 31.083 | 3/5/2011 18:55:01 | 25.304 |
| 3/9/2011 13:06:01 | 31.270 | 3/5/2011 19:15:01 | 25.304 |
| 3/9/2011 13:26:01 | 31.457 | 3/5/2011 19:35:01 | 25.304 |
| 3/9/2011 13:46:01 | 31.208 | 3/5/2011 19:55:01 | 25.304 |
| 3/9/2011 14:06:01 | 31.270 | 3/5/2011 20:15:01 | 25.367 |
| 3/9/2011 14:26:01 | 31.145 | 3/5/2011 20:35:01 | 25.367 |
| 3/9/2011 14:46:01 | 30.708 | 3/5/2011 20:55:01 | 25.367 |
| 3/9/2011 15:06:01 | 30.583 | 3/5/2011 21:15:01 | 25.367 |
| 3/9/2011 15:26:01 | 29.397 | 3/5/2011 21:35:01 | 25.367 |
| 3/9/2011 15:46:01 | 27.461 | 3/5/2011 21:55:01 | 25.367 |
| 3/9/2011 16:06:01 | 26.773 | 3/5/2011 22:15:01 | 25.367 |
| 3/9/2011 16:26:01 | 26.273 | 3/5/2011 22:35:01 | 25.367 |
| 3/9/2011 16:46:01 | 26.024 | 3/5/2011 22:55:01 | 25.367 |
| 3/9/2011 17:06:01 | 25.711 | 3/5/2011 23:15:01 | 25.304 |
| 3/9/2011 17:26:01 | 25.461 | 3/5/2011 23:35:01 | 25.304 |

|                    |        |                   |        |
|--------------------|--------|-------------------|--------|
| 3/9/2011 17:46:01  | 25.274 | 3/5/2011 23:55:01 | 25.304 |
| 3/9/2011 18:06:01  | 24.961 | 3/6/2011 00:15:01 | 25.304 |
| 3/9/2011 18:26:01  | 24.648 | 3/6/2011 00:35:01 | 25.304 |
| 3/9/2011 18:46:01  | 24.461 | 3/6/2011 00:55:01 | 25.304 |
| 3/9/2011 19:06:01  | 24.148 | 3/6/2011 01:15:01 | 25.304 |
| 3/9/2011 19:26:01  | 23.898 | 3/6/2011 01:35:01 | 25.304 |
| 3/9/2011 19:46:01  | 23.773 | 3/6/2011 01:55:01 | 25.304 |
| 3/9/2011 20:06:01  | 23.586 | 3/6/2011 02:15:01 | 25.304 |
| 3/9/2011 20:26:01  | 23.273 | 3/6/2011 02:35:01 | 25.242 |
| 3/9/2011 20:46:01  | 23.086 | 3/6/2011 02:55:01 | 25.242 |
| 3/9/2011 21:06:01  | 22.960 | 3/6/2011 03:15:01 | 25.242 |
| 3/9/2011 21:26:01  | 22.898 | 3/6/2011 03:35:01 | 25.242 |
| 3/9/2011 21:46:01  | 22.773 | 3/6/2011 03:55:01 | 25.242 |
| 3/9/2011 22:06:01  | 22.710 | 3/6/2011 04:15:01 | 25.179 |
| 3/9/2011 22:26:01  | 22.710 | 3/6/2011 04:35:01 | 25.179 |
| 3/9/2011 22:46:01  | 22.835 | 3/6/2011 04:55:01 | 25.179 |
| 3/9/2011 23:06:01  | 22.960 | 3/6/2011 05:15:01 | 25.179 |
| 3/9/2011 23:26:01  | 23.086 | 3/6/2011 05:35:01 | 25.117 |
| 3/9/2011 23:46:01  | 23.211 | 3/6/2011 05:55:01 | 25.117 |
| 3/10/2011 00:06:01 | 23.273 | 3/6/2011 06:15:01 | 25.117 |
| 3/10/2011 00:26:01 | 23.273 | 3/6/2011 06:35:01 | 25.117 |
| 3/10/2011 00:46:01 | 23.211 | 3/6/2011 06:55:01 | 25.054 |
| 3/10/2011 01:06:01 | 23.148 | 3/6/2011 07:15:01 | 25.054 |
| 3/10/2011 01:26:01 | 23.086 | 3/6/2011 07:35:01 | 24.992 |
| 3/10/2011 01:46:01 | 22.960 | 3/6/2011 07:55:01 | 24.992 |
| 3/10/2011 02:06:01 | 22.773 | 3/6/2011 08:15:01 | 24.992 |
| 3/10/2011 02:26:01 | 22.585 | 3/6/2011 08:35:01 | 24.992 |
| 3/10/2011 02:46:01 | 22.523 | 3/6/2011 08:55:01 | 24.929 |
| 3/10/2011 03:06:01 | 22.835 | 3/6/2011 09:15:01 | 24.929 |
| 3/10/2011 03:26:01 | 23.086 | 3/6/2011 09:35:01 | 24.929 |
| 3/10/2011 03:46:01 | 23.148 | 3/6/2011 09:55:01 | 24.867 |
| 3/10/2011 04:06:01 | 23.086 | 3/6/2011 10:15:01 | 24.867 |
| 3/10/2011 04:26:01 | 23.211 | 3/6/2011 10:35:01 | 24.867 |
| 3/10/2011 04:46:01 | 23.336 | 3/6/2011 10:55:01 | 24.867 |
| 3/10/2011 05:06:01 | 23.586 | 3/6/2011 11:15:01 | 24.867 |
| 3/10/2011 05:26:01 | 23.586 | 3/6/2011 11:35:01 | 24.867 |
| 3/10/2011 05:46:01 | 23.398 | 3/6/2011 11:55:01 | 24.867 |
| 3/10/2011 06:06:01 | 23.148 | 3/6/2011 12:15:01 | 24.867 |
| 3/10/2011 06:26:01 | 23.086 | 3/6/2011 12:35:01 | 24.867 |
| 3/10/2011 06:46:01 | 23.148 | 3/6/2011 12:55:01 | 24.867 |
| 3/10/2011 07:06:01 | 23.336 | 3/6/2011 13:15:01 | 24.867 |
| 3/10/2011 07:26:01 | 23.523 | 3/6/2011 13:35:01 | 24.867 |
| 3/10/2011 07:46:01 | 23.961 | 3/6/2011 13:55:01 | 24.867 |
| 3/10/2011 08:06:01 | 24.586 | 3/6/2011 14:15:01 | 24.867 |
| 3/10/2011 08:26:01 | 25.336 | 3/6/2011 14:35:01 | 24.867 |
| 3/10/2011 08:46:01 | 26.336 | 3/6/2011 14:55:01 | 24.867 |
| 3/10/2011 09:06:01 | 26.961 | 3/6/2011 15:15:01 | 24.929 |
| 3/10/2011 09:26:01 | 27.523 | 3/6/2011 15:35:01 | 24.929 |
| 3/10/2011 09:46:01 | 28.273 | 3/6/2011 15:55:01 | 24.929 |
| 3/10/2011 10:06:01 | 28.335 | 3/6/2011 16:15:01 | 24.929 |

|                    |        |                   |        |
|--------------------|--------|-------------------|--------|
| 3/10/2011 10:26:01 | 29.272 | 3/6/2011 16:35:01 | 24.929 |
| 3/10/2011 10:46:01 | 29.272 | 3/6/2011 16:55:01 | 24.992 |
| 3/10/2011 11:06:01 | 29.334 | 3/6/2011 17:15:01 | 24.992 |
| 3/10/2011 11:26:01 | 30.209 | 3/6/2011 17:35:01 | 24.992 |
| 3/10/2011 11:46:01 | 30.833 | 3/6/2011 17:55:01 | 24.992 |
| 3/10/2011 12:06:01 | 31.145 | 3/6/2011 18:15:01 | 24.992 |
| 3/10/2011 12:26:01 | 31.769 | 3/6/2011 18:35:01 | 24.992 |
| 3/10/2011 12:46:01 | 32.206 | 3/6/2011 18:55:01 | 25.054 |
| 3/10/2011 13:06:01 | 29.896 | 3/6/2011 19:15:01 | 25.054 |
| 3/10/2011 13:26:01 | 31.769 | 3/6/2011 19:35:01 | 25.054 |
| 3/10/2011 13:46:01 | 32.830 | 3/6/2011 19:55:01 | 25.054 |
| 3/10/2011 14:06:01 | 32.830 | 3/6/2011 20:15:01 | 25.054 |
| 3/10/2011 14:26:01 | 32.706 | 3/6/2011 20:35:01 | 25.054 |
| 3/10/2011 14:46:01 | 32.394 | 3/6/2011 20:55:01 | 25.054 |
| 3/10/2011 15:06:01 | 32.019 | 3/6/2011 21:15:01 | 25.054 |
| 3/10/2011 15:26:01 | 31.270 | 3/6/2011 21:35:01 | 25.054 |
| 3/10/2011 15:46:01 | 30.084 | 3/6/2011 21:55:01 | 25.054 |
| 3/10/2011 16:06:01 | 28.085 | 3/6/2011 22:15:01 | 25.054 |
| 3/10/2011 16:26:01 | 25.024 | 3/6/2011 22:35:01 | 25.054 |
| 3/10/2011 16:46:01 | 23.961 | 3/6/2011 22:55:01 | 25.054 |
| 3/10/2011 17:06:01 | 24.398 | 3/6/2011 23:15:01 | 25.054 |
| 3/10/2011 17:26:01 | 24.774 | 3/6/2011 23:35:01 | 25.054 |
| 3/10/2011 17:46:01 | 24.711 | 3/6/2011 23:55:01 | 25.054 |
| 3/10/2011 18:06:01 | 24.461 | 3/7/2011 00:15:01 | 25.054 |
| 3/10/2011 18:26:01 | 24.148 | 3/7/2011 00:35:01 | 25.054 |
| 3/10/2011 18:46:01 | 23.961 | 3/7/2011 00:55:01 | 25.054 |
| 3/10/2011 19:06:01 | 23.961 | 3/7/2011 01:15:01 | 25.054 |
| 3/10/2011 19:26:01 | 23.898 | 3/7/2011 01:35:01 | 25.054 |
| 3/10/2011 19:46:01 | 23.836 | 3/7/2011 01:55:01 | 25.054 |
| 3/10/2011 20:06:01 | 23.836 | 3/7/2011 02:15:01 | 25.054 |
| 3/10/2011 20:26:01 | 23.773 | 3/7/2011 02:35:01 | 25.054 |
| 3/10/2011 20:46:01 | 23.711 | 3/7/2011 02:55:01 | 25.054 |
| 3/10/2011 21:06:01 | 23.586 | 3/7/2011 03:15:01 | 25.054 |
| 3/10/2011 21:26:01 | 23.398 | 3/7/2011 03:35:01 | 24.992 |
| 3/10/2011 21:46:01 | 23.336 | 3/7/2011 03:55:01 | 24.992 |
| 3/10/2011 22:06:01 | 23.211 | 3/7/2011 04:15:01 | 24.992 |
| 3/10/2011 22:26:01 | 23.273 | 3/7/2011 04:35:01 | 24.992 |
| 3/10/2011 22:46:01 | 23.273 | 3/7/2011 04:55:01 | 24.992 |
| 3/10/2011 23:06:01 | 23.211 | 3/7/2011 05:15:01 | 24.992 |
| 3/10/2011 23:26:01 | 23.148 | 3/7/2011 05:35:01 | 24.992 |
| 3/10/2011 23:46:01 | 23.273 | 3/7/2011 05:55:01 | 24.992 |
| 3/11/2011 00:06:01 | 23.336 | 3/7/2011 06:15:01 | 24.992 |
| 3/11/2011 00:26:01 | 23.336 | 3/7/2011 06:35:01 | 24.929 |
| 3/11/2011 00:46:01 | 23.336 | 3/7/2011 06:55:01 | 24.929 |
| 3/11/2011 01:06:01 | 23.336 | 3/7/2011 07:15:01 | 24.929 |
| 3/11/2011 01:26:01 | 23.211 | 3/7/2011 07:35:01 | 24.929 |
| 3/11/2011 01:46:01 | 23.086 | 3/7/2011 07:55:01 | 24.929 |
| 3/11/2011 02:06:01 | 23.148 | 3/7/2011 08:15:01 | 24.929 |
| 3/11/2011 02:26:01 | 22.960 | 3/7/2011 08:35:01 | 24.929 |
| 3/11/2011 02:46:01 | 22.835 | 3/7/2011 08:55:01 | 24.929 |



|                    |        |                   |        |
|--------------------|--------|-------------------|--------|
| 3/11/2011 03:06:01 | 22.648 | 3/7/2011 09:15:01 | 24.867 |
| 3/11/2011 03:26:01 | 22.710 | 3/7/2011 09:35:01 | 24.867 |
| 3/11/2011 03:46:01 | 22.648 | 3/7/2011 09:55:01 | 24.867 |
| 3/11/2011 04:06:01 | 22.523 | 3/7/2011 10:15:01 | 24.867 |
| 3/11/2011 04:26:01 | 22.398 | 3/7/2011 10:35:01 | 24.867 |
| 3/11/2011 04:46:01 | 22.273 | 3/7/2011 10:55:01 | 24.867 |
| 3/11/2011 05:06:01 | 22.210 | 3/7/2011 11:15:01 | 24.867 |
| 3/11/2011 05:26:01 | 22.147 | 3/7/2011 11:35:01 | 24.929 |
| 3/11/2011 05:46:01 | 22.022 | 3/7/2011 11:55:01 | 24.929 |
| 3/11/2011 06:06:01 | 22.147 | 3/7/2011 12:15:01 | 24.929 |
| 3/11/2011 06:26:01 | 22.273 | 3/7/2011 12:35:01 | 24.992 |
| 3/11/2011 06:46:01 | 22.523 | 3/7/2011 12:55:01 | 24.992 |
| 3/11/2011 07:06:01 | 22.960 | 3/7/2011 13:15:01 | 24.992 |
| 3/11/2011 07:26:01 | 23.648 | 3/7/2011 13:35:01 | 25.054 |
| 3/11/2011 07:46:01 | 24.398 | 3/7/2011 13:55:01 | 25.054 |
| 3/11/2011 08:06:01 | 25.336 | 3/7/2011 14:15:01 | 25.117 |
| 3/11/2011 08:26:01 | 25.899 | 3/7/2011 14:35:01 | 25.117 |
| 3/11/2011 08:46:01 | 26.273 | 3/7/2011 14:55:01 | 25.117 |
| 3/11/2011 09:06:01 | 26.586 | 3/7/2011 15:15:01 | 25.179 |
| 3/11/2011 09:26:01 | 27.148 | 3/7/2011 15:35:01 | 25.179 |
| 3/11/2011 09:46:01 | 27.586 | 3/7/2011 15:55:01 | 25.242 |
| 3/11/2011 10:06:01 | 28.148 | 3/7/2011 16:15:01 | 25.242 |
| 3/11/2011 10:26:01 | 28.585 | 3/7/2011 16:35:01 | 25.242 |
| 3/11/2011 10:46:01 | 27.773 | 3/7/2011 16:55:01 | 25.304 |
| 3/11/2011 11:06:01 | 28.335 | 3/7/2011 17:15:01 | 25.304 |
| 3/11/2011 11:26:01 | 28.585 | 3/7/2011 17:35:01 | 25.304 |
| 3/11/2011 11:46:01 | 28.023 | 3/7/2011 17:55:01 | 25.304 |
| 3/11/2011 12:06:01 | 27.835 | 3/7/2011 18:15:01 | 25.367 |
| 3/11/2011 12:26:01 | 27.710 | 3/7/2011 18:35:01 | 25.367 |
| 3/11/2011 12:46:01 | 27.148 | 3/7/2011 18:55:01 | 25.367 |
| 3/11/2011 13:06:01 | 27.710 | 3/7/2011 19:15:01 | 25.367 |
| 3/11/2011 13:26:01 | 28.835 | 3/7/2011 19:35:01 | 25.367 |
| 3/11/2011 13:46:01 | 29.459 | 3/7/2011 19:55:01 | 25.367 |
| 3/11/2011 14:06:01 | 29.834 | 3/7/2011 20:15:01 | 25.367 |
| 3/11/2011 14:26:01 | 30.021 | 3/7/2011 20:35:01 | 25.367 |
| 3/11/2011 14:46:01 | 29.959 | 3/7/2011 20:55:01 | 25.367 |
| 3/11/2011 15:06:01 | 29.834 | 3/7/2011 21:15:01 | 25.367 |
| 3/11/2011 15:26:01 | 29.272 | 3/7/2011 21:35:01 | 25.367 |
| 3/11/2011 15:46:01 | 28.585 | 3/7/2011 21:55:01 | 25.367 |
| 3/11/2011 16:06:01 | 28.335 | 3/7/2011 22:15:01 | 25.367 |
| 3/11/2011 16:26:01 | 27.960 | 3/7/2011 22:35:01 | 25.367 |
| 3/11/2011 16:46:01 | 27.648 | 3/7/2011 22:55:01 | 25.367 |
| 3/11/2011 17:06:01 | 27.398 | 3/7/2011 23:15:01 | 25.304 |
| 3/11/2011 17:26:01 | 27.273 | 3/7/2011 23:35:01 | 25.304 |
| 3/11/2011 17:46:01 | 27.148 | 3/7/2011 23:55:01 | 25.304 |
| 3/11/2011 18:06:01 | 26.836 | 3/8/2011 00:15:01 | 25.304 |
| 3/11/2011 18:26:01 | 26.586 | 3/8/2011 00:35:01 | 25.304 |
| 3/11/2011 18:46:01 | 26.398 | 3/8/2011 00:55:01 | 25.304 |
| 3/11/2011 19:06:01 | 26.398 | 3/8/2011 01:15:01 | 25.242 |
| 3/11/2011 19:26:01 | 24.711 | 3/8/2011 01:35:01 | 25.242 |

|                    |        |                   |        |
|--------------------|--------|-------------------|--------|
| 3/11/2011 19:46:01 | 23.773 | 3/8/2011 01:55:01 | 25.242 |
| 3/11/2011 20:06:01 | 23.461 | 3/8/2011 02:15:01 | 25.242 |
| 3/11/2011 20:26:01 | 23.211 | 3/8/2011 02:35:01 | 25.242 |
| 3/11/2011 20:46:01 | 23.211 | 3/8/2011 02:55:01 | 25.242 |
| 3/11/2011 21:06:01 | 23.148 | 3/8/2011 03:15:01 | 25.179 |
| 3/11/2011 21:26:01 | 22.960 | 3/8/2011 03:35:01 | 25.179 |
| 3/11/2011 21:46:01 | 23.023 | 3/8/2011 03:55:01 | 25.179 |
| 3/11/2011 22:06:01 | 22.898 | 3/8/2011 04:15:01 | 25.179 |
| 3/11/2011 22:26:01 | 22.835 | 3/8/2011 04:35:01 | 25.179 |
| 3/11/2011 22:46:01 | 22.835 | 3/8/2011 04:55:01 | 25.179 |
| 3/11/2011 23:06:01 | 22.898 | 3/8/2011 05:15:01 | 25.179 |
| 3/11/2011 23:26:01 | 22.898 | 3/8/2011 05:35:01 | 25.117 |
| 3/11/2011 23:46:01 | 22.960 | 3/8/2011 05:55:01 | 25.117 |
| 3/12/2011 00:06:01 | 22.960 | 3/8/2011 06:15:01 | 25.117 |
| 3/12/2011 00:26:01 | 22.898 | 3/8/2011 06:35:01 | 25.117 |
| 3/12/2011 00:46:01 | 22.960 | 3/8/2011 06:55:01 | 25.117 |
| 3/12/2011 01:06:01 | 23.023 | 3/8/2011 07:15:01 | 25.117 |
| 3/12/2011 01:26:01 | 22.898 | 3/8/2011 07:35:01 | 25.117 |
| 3/12/2011 01:46:01 | 22.773 | 3/8/2011 07:55:01 | 25.054 |
| 3/12/2011 02:06:01 | 22.710 | 3/8/2011 08:15:01 | 25.054 |
| 3/12/2011 02:26:01 | 22.648 | 3/8/2011 08:35:01 | 25.054 |
| 3/12/2011 02:46:01 | 22.585 | 3/8/2011 08:55:01 | 25.054 |
| 3/12/2011 03:06:01 | 22.523 | 3/8/2011 09:15:01 | 25.054 |
| 3/12/2011 03:26:01 | 22.460 | 3/8/2011 09:35:01 | 25.054 |
| 3/12/2011 03:46:01 | 22.398 | 3/8/2011 09:55:01 | 25.054 |
| 3/12/2011 04:06:01 | 22.398 | 3/8/2011 10:15:01 | 25.054 |
| 3/12/2011 04:26:01 | 22.398 | 3/8/2011 10:35:01 | 24.992 |
| 3/12/2011 04:46:01 | 22.335 | 3/8/2011 10:55:01 | 25.054 |
| 3/12/2011 05:06:01 | 22.335 | 3/8/2011 11:15:01 | 25.054 |
| 3/12/2011 05:26:01 | 22.210 | 3/8/2011 11:35:01 | 25.054 |
| 3/12/2011 05:46:01 | 22.147 | 3/8/2011 11:55:01 | 25.054 |
| 3/12/2011 06:06:01 | 22.147 | 3/8/2011 12:15:01 | 25.054 |
| 3/12/2011 06:26:01 | 22.210 | 3/8/2011 12:35:01 | 25.054 |
| 3/12/2011 06:46:01 | 22.585 | 3/8/2011 12:55:01 | 25.054 |
| 3/12/2011 07:06:01 | 23.023 | 3/8/2011 13:15:01 | 25.054 |
| 3/12/2011 07:26:01 | 23.836 | 3/8/2011 13:35:01 | 25.054 |
| 3/12/2011 07:46:01 | 24.461 | 3/8/2011 13:55:01 | 25.054 |
| 3/12/2011 08:06:01 | 24.836 | 3/8/2011 14:15:01 | 25.054 |
| 3/12/2011 08:26:01 | 25.274 | 3/8/2011 14:35:01 | 25.054 |
| 3/12/2011 08:46:01 | 25.961 | 3/8/2011 14:55:01 | 25.054 |
| 3/12/2011 09:06:01 | 26.836 | 3/8/2011 15:15:01 | 25.054 |
| 3/12/2011 09:26:01 | 27.273 | 3/8/2011 15:35:01 | 25.054 |
| 3/12/2011 09:46:01 | 27.461 | 3/8/2011 15:55:01 | 25.054 |
| 3/12/2011 10:06:01 | 27.835 | 3/8/2011 16:15:01 | 25.054 |
| 3/12/2011 10:26:01 | 27.461 | 3/8/2011 16:35:01 | 25.117 |
| 3/12/2011 10:46:01 | 27.148 | 3/8/2011 16:55:01 | 25.054 |
| 3/12/2011 11:06:01 | 28.023 | 3/8/2011 17:15:01 | 25.117 |
| 3/12/2011 11:26:01 | 29.085 | 3/8/2011 17:35:01 | 25.117 |
| 3/12/2011 11:46:01 | 29.272 | 3/8/2011 17:55:01 | 25.117 |
| 3/12/2011 12:06:01 | 30.334 | 3/8/2011 18:15:01 | 25.117 |

|                    |        |                   |        |
|--------------------|--------|-------------------|--------|
| 3/12/2011 12:26:01 | 30.771 | 3/8/2011 18:35:01 | 25.117 |
| 3/12/2011 12:46:01 | 31.020 | 3/8/2011 18:55:01 | 25.117 |
| 3/12/2011 13:06:01 | 31.332 | 3/8/2011 19:15:01 | 25.117 |
| 3/12/2011 13:26:01 | 30.895 | 3/8/2011 19:35:01 | 25.117 |
| 3/12/2011 13:46:01 | 31.208 | 3/8/2011 19:55:01 | 25.117 |
| 3/12/2011 14:06:01 | 31.582 | 3/8/2011 20:15:01 | 25.117 |
| 3/12/2011 14:26:01 | 31.520 | 3/8/2011 20:35:01 | 25.179 |
| 3/12/2011 14:46:01 | 31.145 | 3/8/2011 20:55:01 | 25.117 |
| 3/12/2011 15:06:01 | 30.708 | 3/8/2011 21:15:01 | 25.117 |
| 3/12/2011 15:26:01 | 29.959 | 3/8/2011 21:35:01 | 25.117 |
| 3/12/2011 15:46:01 | 28.835 | 3/8/2011 21:55:01 | 25.117 |
| 3/12/2011 16:06:01 | 26.711 | 3/8/2011 22:15:01 | 25.117 |
| 3/12/2011 16:26:01 | 25.336 | 3/8/2011 22:35:01 | 25.117 |
| 3/12/2011 16:46:01 | 24.523 | 3/8/2011 22:55:01 | 25.117 |
| 3/12/2011 17:06:01 | 24.148 | 3/8/2011 23:15:01 | 25.117 |
| 3/12/2011 17:26:01 | 23.648 | 3/8/2011 23:35:01 | 25.117 |
| 3/12/2011 17:46:01 | 23.586 | 3/8/2011 23:55:01 | 25.117 |
| 3/12/2011 18:06:01 | 23.711 | 3/9/2011 00:15:01 | 25.117 |
| 3/12/2011 18:26:01 | 23.586 | 3/9/2011 00:35:01 | 25.117 |
| 3/12/2011 18:46:01 | 23.586 | 3/9/2011 00:55:01 | 25.117 |
| 3/12/2011 19:06:01 | 23.586 | 3/9/2011 01:15:01 | 25.054 |
| 3/12/2011 19:26:01 | 23.523 | 3/9/2011 01:35:01 | 25.054 |
| 3/12/2011 19:46:01 | 23.398 | 3/9/2011 01:55:01 | 25.054 |
| 3/12/2011 20:06:01 | 23.336 | 3/9/2011 02:15:01 | 25.054 |
| 3/12/2011 20:26:01 | 23.336 | 3/9/2011 02:35:01 | 25.054 |
| 3/12/2011 20:46:01 | 23.211 | 3/9/2011 02:55:01 | 25.054 |
| 3/12/2011 21:06:01 | 23.148 | 3/9/2011 03:15:01 | 24.992 |
| 3/12/2011 21:26:01 | 23.148 | 3/9/2011 03:35:01 | 24.992 |
| 3/12/2011 21:46:01 | 23.148 | 3/9/2011 03:55:01 | 24.992 |
| 3/12/2011 22:06:01 | 23.148 | 3/9/2011 04:15:01 | 24.992 |
| 3/12/2011 22:26:01 | 23.086 | 3/9/2011 04:35:01 | 24.992 |
| 3/12/2011 22:46:01 | 23.023 | 3/9/2011 04:55:01 | 24.992 |
| 3/12/2011 23:06:01 | 23.023 | 3/9/2011 05:15:01 | 24.929 |
| 3/12/2011 23:26:01 | 23.023 | 3/9/2011 05:35:01 | 24.929 |
| 3/12/2011 23:46:01 | 23.023 | 3/9/2011 05:55:01 | 24.929 |
| 3/13/2011 00:06:01 | 23.086 | 3/9/2011 06:15:01 | 24.929 |
| 3/13/2011 00:26:01 | 23.148 | 3/9/2011 06:35:01 | 24.929 |
| 3/13/2011 00:46:01 | 23.273 | 3/9/2011 06:55:01 | 24.929 |
| 3/13/2011 01:06:01 | 23.336 | 3/9/2011 07:15:01 | 24.867 |
| 3/13/2011 01:26:01 | 23.336 | 3/9/2011 07:35:01 | 24.867 |
| 3/13/2011 01:46:01 | 23.336 | 3/9/2011 07:55:01 | 24.867 |
| 3/13/2011 02:06:01 | 23.273 | 3/9/2011 08:15:01 | 24.867 |
| 3/13/2011 02:26:01 | 23.211 | 3/9/2011 08:35:01 | 24.867 |
| 3/13/2011 02:46:01 | 23.211 | 3/9/2011 08:55:01 | 24.867 |
| 3/13/2011 03:06:01 | 23.086 | 3/9/2011 09:15:01 | 24.804 |
| 3/13/2011 03:26:01 | 23.086 | 3/9/2011 09:35:01 | 24.804 |
| 3/13/2011 03:46:01 | 22.960 | 3/9/2011 09:55:01 | 24.804 |
| 3/13/2011 04:06:01 | 22.898 | 3/9/2011 10:15:01 | 24.804 |
| 3/13/2011 04:26:01 | 22.898 | 3/9/2011 10:35:01 | 24.804 |
| 3/13/2011 04:46:01 | 22.835 | 3/9/2011 10:55:01 | 24.804 |

|                    |        |                    |        |
|--------------------|--------|--------------------|--------|
| 3/13/2011 05:06:01 | 22.773 | 3/9/2011 11:15:01  | 24.804 |
| 3/13/2011 05:26:01 | 22.710 | 3/9/2011 11:35:01  | 24.867 |
| 3/13/2011 05:46:01 | 22.523 | 3/9/2011 11:55:01  | 24.867 |
| 3/13/2011 06:06:01 | 22.523 | 3/9/2011 12:15:01  | 24.867 |
| 3/13/2011 06:26:01 | 22.710 | 3/9/2011 12:35:01  | 24.867 |
| 3/13/2011 06:46:01 | 23.023 | 3/9/2011 12:55:01  | 24.929 |
| 3/13/2011 07:06:01 | 23.523 | 3/9/2011 13:15:01  | 24.929 |
| 3/13/2011 07:26:01 | 24.148 | 3/9/2011 13:35:01  | 24.992 |
| 3/13/2011 07:46:01 | 24.648 | 3/9/2011 13:55:01  | 24.992 |
| 3/13/2011 08:06:01 | 25.149 | 3/9/2011 14:15:01  | 24.992 |
| 3/13/2011 08:26:01 | 25.399 | 3/9/2011 14:35:01  | 25.054 |
| 3/13/2011 08:46:01 | 25.711 | 3/9/2011 14:55:01  | 25.054 |
| 3/13/2011 09:06:01 | 25.899 | 3/9/2011 15:15:01  | 25.117 |
| 3/13/2011 09:26:01 | 25.899 | 3/9/2011 15:35:01  | 25.117 |
| 3/13/2011 09:46:01 | 26.211 | 3/9/2011 15:55:01  | 25.179 |
| 3/13/2011 10:06:01 | 27.086 | 3/9/2011 16:15:01  | 25.179 |
| 3/13/2011 10:26:01 | 27.461 | 3/9/2011 16:35:01  | 25.179 |
| 3/13/2011 10:46:01 | 28.085 | 3/9/2011 16:55:01  | 25.179 |
| 3/13/2011 11:06:01 | 28.710 | 3/9/2011 17:15:01  | 25.242 |
| 3/13/2011 11:26:01 | 28.210 | 3/9/2011 17:35:01  | 25.242 |
| 3/13/2011 11:46:01 | 28.148 | 3/9/2011 17:55:01  | 25.242 |
| 3/13/2011 12:06:01 | 28.273 | 3/9/2011 18:15:01  | 25.242 |
| 3/13/2011 12:26:01 | 29.459 | 3/9/2011 18:35:01  | 25.304 |
| 3/13/2011 12:46:01 | 29.896 | 3/9/2011 18:55:01  | 25.304 |
| 3/13/2011 13:06:01 | 30.271 | 3/9/2011 19:15:01  | 25.304 |
| 3/13/2011 13:26:01 | 30.521 | 3/9/2011 19:35:01  | 25.304 |
| 3/13/2011 13:46:01 | 30.708 | 3/9/2011 19:55:01  | 25.304 |
| 3/13/2011 14:06:01 | 30.895 | 3/9/2011 20:15:01  | 25.304 |
| 3/13/2011 14:26:01 | 30.895 | 3/9/2011 20:35:01  | 25.304 |
| 3/13/2011 14:46:01 | 30.021 | 3/9/2011 20:55:01  | 25.242 |
| 3/13/2011 15:06:01 | 30.334 | 3/9/2011 21:15:01  | 25.242 |
| 3/13/2011 15:26:01 | 29.272 | 3/9/2011 21:35:01  | 25.242 |
| 3/13/2011 15:46:01 | 28.023 | 3/9/2011 21:55:01  | 25.242 |
| 3/13/2011 16:06:01 | 27.086 | 3/9/2011 22:15:01  | 25.242 |
| 3/13/2011 16:26:01 | 26.148 | 3/9/2011 22:35:01  | 25.242 |
| 3/13/2011 16:46:01 | 25.649 | 3/9/2011 22:55:01  | 25.242 |
| 3/13/2011 17:06:01 | 25.336 | 3/9/2011 23:15:01  | 25.179 |
| 3/13/2011 17:26:01 | 25.024 | 3/9/2011 23:35:01  | 25.179 |
| 3/13/2011 17:46:01 | 24.899 | 3/9/2011 23:55:01  | 25.179 |
| 3/13/2011 18:06:01 | 24.774 | 3/10/2011 00:15:01 | 25.179 |
| 3/13/2011 18:26:01 | 24.961 | 3/10/2011 00:35:01 | 25.117 |
| 3/13/2011 18:46:01 | 23.086 | 3/10/2011 00:55:01 | 25.117 |
| 3/13/2011 19:06:01 | 22.335 | 3/10/2011 01:15:01 | 25.117 |
| 3/13/2011 19:26:01 | 22.273 | 3/10/2011 01:35:01 | 25.117 |
| 3/13/2011 19:46:01 | 22.273 | 3/10/2011 01:55:01 | 25.117 |
| 3/13/2011 20:06:01 | 22.273 | 3/10/2011 02:15:01 | 25.054 |
| 3/13/2011 20:26:01 | 22.147 | 3/10/2011 02:35:01 | 25.054 |
| 3/13/2011 20:46:01 | 22.147 | 3/10/2011 02:55:01 | 25.054 |
| 3/13/2011 21:06:01 | 22.210 | 3/10/2011 03:15:01 | 25.054 |
| 3/13/2011 21:26:01 | 22.147 | 3/10/2011 03:35:01 | 25.054 |

|                    |        |                    |        |
|--------------------|--------|--------------------|--------|
| 3/13/2011 21:46:01 | 22.147 | 3/10/2011 03:55:01 | 24.992 |
| 3/13/2011 22:06:01 | 22.210 | 3/10/2011 04:15:01 | 24.992 |
| 3/13/2011 22:26:01 | 22.147 | 3/10/2011 04:35:01 | 24.992 |
| 3/13/2011 22:46:01 | 22.147 | 3/10/2011 04:55:01 | 24.992 |
| 3/13/2011 23:06:01 | 22.147 | 3/10/2011 05:15:01 | 24.992 |
| 3/13/2011 23:26:01 | 22.210 | 3/10/2011 05:35:01 | 24.929 |
| 3/13/2011 23:46:01 | 22.147 | 3/10/2011 05:55:01 | 24.929 |
| 3/14/2011 00:06:01 | 22.147 | 3/10/2011 06:15:01 | 24.929 |
| 3/14/2011 00:26:01 | 22.085 | 3/10/2011 06:35:01 | 24.929 |
| 3/14/2011 00:46:01 | 22.085 | 3/10/2011 06:55:01 | 24.929 |
| 3/14/2011 01:06:01 | 22.147 | 3/10/2011 07:15:01 | 24.929 |
| 3/14/2011 01:26:01 | 22.273 | 3/10/2011 07:35:01 | 24.867 |
| 3/14/2011 01:46:01 | 22.398 | 3/10/2011 07:55:01 | 24.867 |
| 3/14/2011 02:06:01 | 22.523 | 3/10/2011 08:15:01 | 24.867 |
| 3/14/2011 02:26:01 | 22.710 | 3/10/2011 08:35:01 | 24.867 |
| 3/14/2011 02:46:01 | 22.773 | 3/10/2011 08:55:01 | 24.867 |
| 3/14/2011 03:06:01 | 22.898 | 3/10/2011 09:15:01 | 24.867 |
| 3/14/2011 03:26:01 | 23.023 | 3/10/2011 09:35:01 | 24.867 |
| 3/14/2011 03:46:01 | 23.086 | 3/10/2011 09:55:01 | 24.867 |
| 3/14/2011 04:06:01 | 22.960 | 3/10/2011 10:15:01 | 24.804 |
| 3/14/2011 04:26:01 | 22.898 | 3/10/2011 10:35:01 | 24.804 |
| 3/14/2011 04:46:01 | 22.898 | 3/10/2011 10:55:01 | 24.867 |
| 3/14/2011 05:06:01 | 22.773 | 3/10/2011 11:15:01 | 24.867 |
| 3/14/2011 05:26:01 | 22.710 | 3/10/2011 11:35:01 | 24.867 |
| 3/14/2011 05:46:01 | 22.585 | 3/10/2011 11:55:01 | 24.867 |
| 3/14/2011 06:06:01 | 22.710 | 3/10/2011 12:15:01 | 24.867 |
| 3/14/2011 06:26:01 | 22.960 | 3/10/2011 12:35:01 | 24.867 |
| 3/14/2011 06:46:01 | 23.211 | 3/10/2011 12:55:01 | 24.929 |
| 3/14/2011 07:06:01 | 23.836 | 3/10/2011 13:15:01 | 24.929 |
| 3/14/2011 07:26:01 | 24.461 | 3/10/2011 13:35:01 | 24.929 |
| 3/14/2011 07:46:01 | 25.024 | 3/10/2011 13:55:01 | 24.992 |
| 3/14/2011 08:06:01 | 25.274 | 3/10/2011 14:15:01 | 24.992 |
| 3/14/2011 08:26:01 | 25.211 | 3/10/2011 14:35:01 | 25.054 |
| 3/14/2011 08:46:01 | 25.649 | 3/10/2011 14:55:01 | 25.054 |
| 3/14/2011 09:06:01 | 25.899 | 3/10/2011 15:15:01 | 25.054 |
| 3/14/2011 09:26:01 | 26.273 | 3/10/2011 15:35:01 | 25.054 |
| 3/14/2011 09:46:01 | 26.211 | 3/10/2011 15:55:01 | 25.117 |
| 3/14/2011 10:06:01 | 26.648 | 3/10/2011 16:15:01 | 25.117 |
| 3/14/2011 10:26:01 | 26.898 | 3/10/2011 16:35:01 | 25.179 |
| 3/14/2011 10:46:01 | 27.336 | 3/10/2011 16:55:01 | 25.179 |
| 3/14/2011 11:06:01 | 28.085 | 3/10/2011 17:15:01 | 25.242 |
| 3/14/2011 11:26:01 | 28.710 | 3/10/2011 17:35:01 | 25.242 |
| 3/14/2011 11:46:01 | 28.897 | 3/10/2011 17:55:01 | 25.242 |
| 3/14/2011 12:06:01 | 29.272 | 3/10/2011 18:15:01 | 25.242 |
| 3/14/2011 12:26:01 | 29.772 | 3/10/2011 18:35:01 | 25.242 |
| 3/14/2011 12:46:01 | 30.209 | 3/10/2011 18:55:01 | 25.242 |
| 3/14/2011 13:06:01 | 30.334 | 3/10/2011 19:15:01 | 25.179 |
| 3/14/2011 13:26:01 | 30.521 | 3/10/2011 19:35:01 | 25.179 |
| 3/14/2011 13:46:01 | 30.958 | 3/10/2011 19:55:01 | 25.179 |
| 3/14/2011 14:06:01 | 30.895 | 3/10/2011 20:15:01 | 25.179 |

|                    |        |                    |        |
|--------------------|--------|--------------------|--------|
| 3/14/2011 14:26:01 | 30.271 | 3/10/2011 20:35:01 | 25.179 |
| 3/14/2011 14:46:01 | 29.647 | 3/10/2011 20:55:01 | 25.179 |
| 3/14/2011 15:06:01 | 29.272 | 3/10/2011 21:15:01 | 25.117 |
| 3/14/2011 15:26:01 | 28.710 | 3/10/2011 21:35:01 | 25.117 |
| 3/14/2011 15:46:01 | 27.710 | 3/10/2011 21:55:01 | 25.117 |
| 3/14/2011 16:06:01 | 27.211 | 3/10/2011 22:15:01 | 25.117 |
| 3/14/2011 16:26:01 | 27.398 | 3/10/2011 22:35:01 | 25.117 |
| 3/14/2011 16:46:01 | 27.148 | 3/10/2011 22:55:01 | 25.117 |
| 3/14/2011 17:06:01 | 27.086 | 3/10/2011 23:15:01 | 25.054 |
| 3/14/2011 17:26:01 | 26.898 | 3/10/2011 23:35:01 | 25.054 |
| 3/14/2011 17:46:01 | 26.648 | 3/10/2011 23:55:01 | 25.054 |
| 3/14/2011 18:06:01 | 26.461 | 3/11/2011 00:15:01 | 25.054 |
| 3/14/2011 18:26:01 | 25.586 | 3/11/2011 00:35:01 | 25.054 |
| 3/14/2011 18:46:01 | 25.399 | 3/11/2011 00:55:01 | 25.054 |
| 3/14/2011 19:06:01 | 25.336 | 3/11/2011 01:15:01 | 24.992 |
| 3/14/2011 19:26:01 | 25.211 | 3/11/2011 01:35:01 | 24.992 |
| 3/14/2011 19:46:01 | 25.336 | 3/11/2011 01:55:01 | 24.992 |
| 3/14/2011 20:06:01 | 25.024 | 3/11/2011 02:15:01 | 24.992 |
| 3/14/2011 20:26:01 | 24.523 | 3/11/2011 02:35:01 | 24.992 |
| 3/14/2011 20:46:01 | 23.961 | 3/11/2011 02:55:01 | 24.992 |
| 3/14/2011 21:06:01 | 23.648 | 3/11/2011 03:15:01 | 24.929 |
| 3/14/2011 21:26:01 | 23.523 | 3/11/2011 03:35:01 | 24.929 |
| 3/14/2011 21:46:01 | 23.523 | 3/11/2011 03:55:01 | 24.929 |
| 3/14/2011 22:06:01 | 23.586 | 3/11/2011 04:15:01 | 24.929 |
| 3/14/2011 22:26:01 | 23.461 | 3/11/2011 04:35:01 | 24.929 |
| 3/14/2011 22:46:01 | 23.336 | 3/11/2011 04:55:01 | 24.929 |
| 3/14/2011 23:06:01 | 23.273 | 3/11/2011 05:15:01 | 24.929 |
| 3/14/2011 23:26:01 | 23.211 | 3/11/2011 05:35:01 | 24.867 |
| 3/14/2011 23:46:01 | 23.211 | 3/11/2011 05:55:01 | 24.867 |
| 3/15/2011 00:06:01 | 23.336 | 3/11/2011 06:15:01 | 24.867 |
| 3/15/2011 00:26:01 | 23.273 | 3/11/2011 06:35:01 | 24.867 |
| 3/15/2011 00:46:01 | 23.273 | 3/11/2011 06:55:01 | 24.867 |
| 3/15/2011 01:06:01 | 23.336 | 3/11/2011 07:15:01 | 24.867 |
| 3/15/2011 01:26:01 | 23.398 | 3/11/2011 07:35:01 | 24.804 |
| 3/15/2011 01:46:01 | 23.461 | 3/11/2011 07:55:01 | 24.804 |
| 3/15/2011 02:06:01 | 23.461 | 3/11/2011 08:15:01 | 24.804 |
| 3/15/2011 02:26:01 | 23.523 | 3/11/2011 08:35:01 | 24.804 |
| 3/15/2011 02:46:01 | 23.461 | 3/11/2011 08:55:01 | 24.804 |
| 3/15/2011 03:06:01 | 23.523 | 3/11/2011 09:15:01 | 24.742 |
| 3/15/2011 03:26:01 | 23.523 | 3/11/2011 09:35:01 | 24.742 |
| 3/15/2011 03:46:01 | 23.523 | 3/11/2011 09:55:01 | 24.742 |
| 3/15/2011 04:06:01 | 23.523 | 3/11/2011 10:15:01 | 24.742 |
| 3/15/2011 04:26:01 | 23.461 | 3/11/2011 10:35:01 | 24.742 |
| 3/15/2011 04:46:01 | 23.461 | 3/11/2011 10:55:01 | 24.742 |
| 3/15/2011 05:06:01 | 23.461 | 3/11/2011 11:15:01 | 24.742 |
| 3/15/2011 05:26:01 | 23.461 | 3/11/2011 11:35:01 | 24.804 |
| 3/15/2011 05:46:01 | 23.273 | 3/11/2011 11:55:01 | 24.804 |
| 3/15/2011 06:06:01 | 23.023 | 3/11/2011 12:15:01 | 24.804 |
| 3/15/2011 06:26:01 | 22.898 | 3/11/2011 12:35:01 | 24.804 |
| 3/15/2011 06:46:01 | 23.086 | 3/11/2011 12:55:01 | 24.867 |

|                    |        |                    |        |
|--------------------|--------|--------------------|--------|
| 3/15/2011 07:06:01 | 23.523 | 3/11/2011 13:15:01 | 24.867 |
| 3/15/2011 07:26:01 | 24.398 | 3/11/2011 13:35:01 | 24.867 |
| 3/15/2011 07:46:01 | 25.274 | 3/11/2011 13:55:01 | 24.929 |
| 3/15/2011 08:06:01 | 25.649 | 3/11/2011 14:15:01 | 24.929 |
| 3/15/2011 08:26:01 | 26.586 | 3/11/2011 14:35:01 | 24.929 |
| 3/15/2011 08:46:01 | 26.024 | 3/11/2011 14:55:01 | 24.992 |
| 3/15/2011 09:06:01 | 26.586 | 3/11/2011 15:15:01 | 24.992 |
| 3/15/2011 09:26:01 | 27.586 | 3/11/2011 15:35:01 | 24.992 |
| 3/15/2011 09:46:01 | 28.085 | 3/11/2011 15:55:01 | 25.054 |
| 3/15/2011 10:06:01 | 27.898 | 3/11/2011 16:15:01 | 25.054 |
| 3/15/2011 10:26:01 | 28.585 | 3/11/2011 16:35:01 | 25.054 |
| 3/15/2011 10:46:01 | 28.897 | 3/11/2011 16:55:01 | 25.117 |
| 3/15/2011 11:06:01 | 29.459 | 3/11/2011 17:15:01 | 25.117 |
| 3/15/2011 11:26:01 | 30.021 | 3/11/2011 17:35:01 | 25.117 |
| 3/15/2011 11:46:01 | 30.521 | 3/11/2011 17:55:01 | 25.117 |
| 3/15/2011 12:06:01 | 30.958 | 3/11/2011 18:15:01 | 25.179 |
| 3/15/2011 12:26:01 | 31.270 | 3/11/2011 18:35:01 | 25.179 |
| 3/15/2011 12:46:01 | 31.520 | 3/11/2011 18:55:01 | 25.179 |
| 3/15/2011 13:06:01 | 31.520 | 3/11/2011 19:15:01 | 25.179 |
| 3/15/2011 13:26:01 | 31.832 | 3/11/2011 19:35:01 | 25.242 |
| 3/15/2011 13:46:01 | 31.894 | 3/11/2011 19:55:01 | 25.242 |
| 3/15/2011 14:06:01 | 32.081 | 3/11/2011 20:15:01 | 25.242 |
| 3/15/2011 14:26:01 | 31.957 | 3/11/2011 20:35:01 | 25.242 |
| 3/15/2011 14:46:01 | 31.832 | 3/11/2011 20:55:01 | 25.242 |
| 3/15/2011 15:06:01 | 31.270 | 3/11/2011 21:15:01 | 25.242 |
| 3/15/2011 15:26:01 | 30.521 | 3/11/2011 21:35:01 | 25.242 |
| 3/15/2011 15:46:01 | 29.834 | 3/11/2011 21:55:01 | 25.242 |
| 3/15/2011 16:06:01 | 29.459 | 3/11/2011 22:15:01 | 25.242 |
| 3/15/2011 16:26:01 | 28.960 | 3/11/2011 22:35:01 | 25.242 |
| 3/15/2011 16:46:01 | 28.460 | 3/11/2011 22:55:01 | 25.242 |
| 3/15/2011 17:06:01 | 27.835 | 3/11/2011 23:15:01 | 25.242 |
| 3/15/2011 17:26:01 | 27.398 | 3/11/2011 23:35:01 | 25.179 |
| 3/15/2011 17:46:01 | 27.211 | 3/11/2011 23:55:01 | 25.179 |
| 3/15/2011 18:06:01 | 26.711 | 3/12/2011 00:15:01 | 25.179 |
| 3/15/2011 18:26:01 | 26.398 | 3/12/2011 00:35:01 | 25.179 |
| 3/15/2011 18:46:01 | 26.211 | 3/12/2011 00:55:01 | 25.117 |
| 3/15/2011 19:06:01 | 26.148 | 3/12/2011 01:15:01 | 25.117 |
| 3/15/2011 19:26:01 | 26.148 | 3/12/2011 01:35:01 | 25.117 |
| 3/15/2011 19:46:01 | 26.273 | 3/12/2011 01:55:01 | 25.117 |
| 3/15/2011 20:06:01 | 26.148 | 3/12/2011 02:15:01 | 25.054 |
| 3/15/2011 20:26:01 | 24.461 | 3/12/2011 02:35:01 | 25.054 |
| 3/15/2011 20:46:01 | 24.086 | 3/12/2011 02:55:01 | 25.054 |
| 3/15/2011 21:06:01 | 23.961 | 3/12/2011 03:15:01 | 25.054 |
| 3/15/2011 21:26:01 | 23.898 | 3/12/2011 03:35:01 | 24.992 |
| 3/15/2011 21:46:01 | 23.961 | 3/12/2011 03:55:01 | 24.992 |
| 3/15/2011 22:06:01 | 23.898 | 3/12/2011 04:15:01 | 24.992 |
| 3/15/2011 22:26:01 | 23.898 | 3/12/2011 04:35:01 | 24.992 |
| 3/15/2011 22:46:01 | 23.773 | 3/12/2011 04:55:01 | 24.992 |
| 3/15/2011 23:06:01 | 23.711 | 3/12/2011 05:15:01 | 24.929 |
| 3/15/2011 23:26:01 | 23.648 | 3/12/2011 05:35:01 | 24.929 |

|                    |        |                    |        |
|--------------------|--------|--------------------|--------|
| 3/15/2011 23:46:01 | 23.586 | 3/12/2011 05:55:01 | 24.929 |
| 3/16/2011 00:06:01 | 23.586 | 3/12/2011 06:15:01 | 24.929 |
| 3/16/2011 00:26:01 | 23.648 | 3/12/2011 06:35:01 | 24.867 |
| 3/16/2011 00:46:01 | 23.586 | 3/12/2011 06:55:01 | 24.867 |
| 3/16/2011 01:06:01 | 23.648 | 3/12/2011 07:15:01 | 24.867 |
| 3/16/2011 01:26:01 | 23.648 | 3/12/2011 07:35:01 | 24.867 |
| 3/16/2011 01:46:01 | 23.586 | 3/12/2011 07:55:01 | 24.804 |
| 3/16/2011 02:06:01 | 23.523 | 3/12/2011 08:15:01 | 24.804 |
| 3/16/2011 02:26:01 | 23.398 | 3/12/2011 08:35:01 | 24.804 |
| 3/16/2011 02:46:01 | 23.336 | 3/12/2011 08:55:01 | 24.804 |
| 3/16/2011 03:06:01 | 23.211 | 3/12/2011 09:15:01 | 24.742 |
| 3/16/2011 03:26:01 | 23.273 | 3/12/2011 09:35:01 | 24.742 |
| 3/16/2011 03:46:01 | 23.273 | 3/12/2011 09:55:01 | 24.742 |
| 3/16/2011 04:06:01 | 23.273 | 3/12/2011 10:15:01 | 24.742 |
| 3/16/2011 04:26:01 | 23.273 | 3/12/2011 10:35:01 | 24.742 |
| 3/16/2011 04:46:01 | 23.211 | 3/12/2011 10:55:01 | 24.742 |
| 3/16/2011 05:06:01 | 23.148 | 3/12/2011 11:15:01 | 24.742 |
| 3/16/2011 05:26:01 | 23.086 | 3/12/2011 11:35:01 | 24.742 |
| 3/16/2011 05:46:01 | 23.023 | 3/12/2011 11:55:01 | 24.804 |
| 3/16/2011 06:06:01 | 22.960 | 3/12/2011 12:15:01 | 24.804 |
| 3/16/2011 06:26:01 | 23.023 | 3/12/2011 12:35:01 | 24.804 |
| 3/16/2011 06:46:01 | 23.398 | 3/12/2011 12:55:01 | 24.804 |
| 3/16/2011 07:06:01 | 23.773 | 3/12/2011 13:15:01 | 24.867 |
| 3/16/2011 07:26:01 | 24.086 | 3/12/2011 13:35:01 | 24.867 |
| 3/16/2011 07:46:01 | 24.461 | 3/12/2011 13:55:01 | 24.867 |
| 3/16/2011 08:06:01 | 24.899 | 3/12/2011 14:15:01 | 24.929 |
| 3/16/2011 08:26:01 | 25.399 | 3/12/2011 14:35:01 | 24.929 |
| 3/16/2011 08:46:01 | 26.086 | 3/12/2011 14:55:01 | 24.992 |
| 3/16/2011 09:06:01 | 26.148 | 3/12/2011 15:15:01 | 24.992 |
| 3/16/2011 09:26:01 | 26.024 | 3/12/2011 15:35:01 | 24.992 |
| 3/16/2011 09:46:01 | 26.398 | 3/12/2011 15:55:01 | 25.054 |
| 3/16/2011 10:06:01 | 26.898 | 3/12/2011 16:15:01 | 25.054 |
| 3/16/2011 10:26:01 | 27.336 | 3/12/2011 16:35:01 | 25.054 |
| 3/16/2011 10:46:01 | 27.398 | 3/12/2011 16:55:01 | 25.117 |
| 3/16/2011 11:06:01 | 28.023 | 3/12/2011 17:15:01 | 25.117 |
| 3/16/2011 11:26:01 | 28.897 | 3/12/2011 17:35:01 | 25.117 |
| 3/16/2011 11:46:01 | 29.210 | 3/12/2011 17:55:01 | 25.179 |
| 3/16/2011 12:06:01 | 29.522 | 3/12/2011 18:15:01 | 25.179 |
| 3/16/2011 12:26:01 | 29.896 | 3/12/2011 18:35:01 | 25.179 |
| 3/16/2011 12:46:01 | 29.959 | 3/12/2011 18:55:01 | 25.179 |
| 3/16/2011 13:06:01 | 30.396 | 3/12/2011 19:15:01 | 25.179 |
| 3/16/2011 13:26:01 | 30.958 | 3/12/2011 19:35:01 | 25.179 |
| 3/16/2011 13:46:01 | 30.958 | 3/12/2011 19:55:01 | 25.179 |
| 3/16/2011 14:06:01 | 30.895 | 3/12/2011 20:15:01 | 25.179 |
| 3/16/2011 14:26:01 | 30.521 | 3/12/2011 20:35:01 | 25.179 |
| 3/16/2011 14:46:01 | 30.021 | 3/12/2011 20:55:01 | 25.117 |
| 3/16/2011 15:06:01 | 30.146 | 3/12/2011 21:15:01 | 25.117 |
| 3/16/2011 15:26:01 | 29.522 | 3/12/2011 21:35:01 | 25.117 |
| 3/16/2011 15:46:01 | 29.397 | 3/12/2011 21:55:01 | 25.117 |
| 3/16/2011 16:06:01 | 28.835 | 3/12/2011 22:15:01 | 25.117 |



|                    |        |                    |        |
|--------------------|--------|--------------------|--------|
| 3/16/2011 16:26:01 | 28.460 | 3/12/2011 22:35:01 | 25.117 |
| 3/16/2011 16:46:01 | 27.960 | 3/12/2011 22:55:01 | 25.054 |
| 3/16/2011 17:06:01 | 27.710 | 3/12/2011 23:15:01 | 25.054 |
| 3/16/2011 17:26:01 | 27.398 | 3/12/2011 23:35:01 | 25.054 |
| 3/16/2011 17:46:01 | 27.086 | 3/12/2011 23:55:01 | 25.054 |
| 3/16/2011 18:06:01 | 26.773 | 3/13/2011 00:15:01 | 25.054 |
| 3/16/2011 18:26:01 | 26.398 | 3/13/2011 00:35:01 | 24.992 |
| 3/16/2011 18:46:01 | 25.774 | 3/13/2011 00:55:01 | 24.992 |
| 3/16/2011 19:06:01 | 25.274 | 3/13/2011 01:15:01 | 24.992 |
| 3/16/2011 19:26:01 | 25.024 | 3/13/2011 01:35:01 | 24.992 |
| 3/16/2011 19:46:01 | 24.774 | 3/13/2011 01:55:01 | 24.929 |
| 3/16/2011 20:06:01 | 24.461 | 3/13/2011 02:15:01 | 24.929 |
| 3/16/2011 20:26:01 | 24.398 | 3/13/2011 02:35:01 | 24.929 |
| 3/16/2011 20:46:01 | 24.211 | 3/13/2011 02:55:01 | 24.929 |
| 3/16/2011 21:06:01 | 24.023 | 3/13/2011 03:15:01 | 24.929 |
| 3/16/2011 21:26:01 | 23.836 | 3/13/2011 03:35:01 | 24.929 |
| 3/16/2011 21:46:01 | 23.711 | 3/13/2011 03:55:01 | 24.867 |
| 3/16/2011 22:06:01 | 23.648 | 3/13/2011 04:15:01 | 24.867 |
| 3/16/2011 22:26:01 | 23.836 | 3/13/2011 04:35:01 | 24.867 |
| 3/16/2011 22:46:01 | 23.961 | 3/13/2011 04:55:01 | 24.867 |
| 3/16/2011 23:06:01 | 23.961 | 3/13/2011 05:15:01 | 24.867 |
| 3/16/2011 23:26:01 | 23.898 | 3/13/2011 05:35:01 | 24.804 |
| 3/16/2011 23:46:01 | 24.086 | 3/13/2011 05:55:01 | 24.804 |
| 3/17/2011 00:06:01 | 24.086 | 3/13/2011 06:15:01 | 24.804 |
| 3/17/2011 00:26:01 | 24.148 | 3/13/2011 06:35:01 | 24.804 |
| 3/17/2011 00:46:01 | 24.148 | 3/13/2011 06:55:01 | 24.804 |
| 3/17/2011 01:06:01 | 24.148 | 3/13/2011 07:15:01 | 24.804 |
| 3/17/2011 01:26:01 | 23.898 | 3/13/2011 07:35:01 | 24.742 |
| 3/17/2011 01:46:01 | 23.711 | 3/13/2011 07:55:01 | 24.742 |
| 3/17/2011 02:06:01 | 23.398 | 3/13/2011 08:15:01 | 24.742 |
| 3/17/2011 02:26:01 | 23.148 | 3/13/2011 08:35:01 | 24.742 |
| 3/17/2011 02:46:01 | 22.835 | 3/13/2011 08:55:01 | 24.742 |
| 3/17/2011 03:06:01 | 22.585 | 3/13/2011 09:15:01 | 24.742 |
| 3/17/2011 03:26:01 | 22.460 | 3/13/2011 09:35:01 | 24.679 |
| 3/17/2011 03:46:01 | 22.210 | 3/13/2011 09:55:01 | 24.679 |
| 3/17/2011 04:06:01 | 22.147 | 3/13/2011 10:15:01 | 24.679 |
| 3/17/2011 04:26:01 | 22.085 | 3/13/2011 10:35:01 | 24.679 |
| 3/17/2011 04:46:01 | 21.960 | 3/13/2011 10:55:01 | 24.679 |
| 3/17/2011 05:06:01 | 21.960 | 3/13/2011 11:15:01 | 24.679 |
| 3/17/2011 05:26:01 | 22.022 | 3/13/2011 11:35:01 | 24.679 |
| 3/17/2011 05:46:01 | 22.022 | 3/13/2011 11:55:01 | 24.742 |
| 3/17/2011 06:06:01 | 22.022 | 3/13/2011 12:15:01 | 24.742 |
| 3/17/2011 06:26:01 | 22.210 | 3/13/2011 12:35:01 | 24.742 |
| 3/17/2011 06:46:01 | 22.585 | 3/13/2011 12:55:01 | 24.742 |
| 3/17/2011 07:06:01 | 23.023 | 3/13/2011 13:15:01 | 24.804 |
| 3/17/2011 07:26:01 | 23.648 | 3/13/2011 13:35:01 | 24.804 |
| 3/17/2011 07:46:01 | 24.398 | 3/13/2011 13:55:01 | 24.804 |
| 3/17/2011 08:06:01 | 24.648 | 3/13/2011 14:15:01 | 24.867 |
| 3/17/2011 08:26:01 | 25.524 | 3/13/2011 14:35:01 | 24.867 |
| 3/17/2011 08:46:01 | 26.148 | 3/13/2011 14:55:01 | 24.867 |

|                    |        |                    |        |
|--------------------|--------|--------------------|--------|
| 3/17/2011 09:06:01 | 27.148 | 3/13/2011 15:15:01 | 24.929 |
| 3/17/2011 09:26:01 | 27.586 | 3/13/2011 15:35:01 | 24.929 |
| 3/17/2011 09:46:01 | 28.210 | 3/13/2011 15:55:01 | 24.929 |
| 3/17/2011 10:06:01 | 28.710 | 3/13/2011 16:15:01 | 24.992 |
| 3/17/2011 10:26:01 | 29.147 | 3/13/2011 16:35:01 | 24.992 |
| 3/17/2011 10:46:01 | 29.459 | 3/13/2011 16:55:01 | 24.992 |
| 3/17/2011 11:06:01 | 29.959 | 3/13/2011 17:15:01 | 24.992 |
| 3/17/2011 11:26:01 | 30.396 | 3/13/2011 17:35:01 | 24.992 |
| 3/17/2011 11:46:01 | 30.396 | 3/13/2011 17:55:01 | 25.054 |
| 3/17/2011 12:06:01 | 30.771 | 3/13/2011 18:15:01 | 25.054 |
| 3/17/2011 12:26:01 | 30.958 | 3/13/2011 18:35:01 | 25.054 |
| 3/17/2011 12:46:01 | 31.208 | 3/13/2011 18:55:01 | 25.054 |
| 3/17/2011 13:06:01 | 31.769 | 3/13/2011 19:15:01 | 25.054 |
| 3/17/2011 13:26:01 | 31.769 | 3/13/2011 19:35:01 | 25.054 |
| 3/17/2011 13:46:01 | 31.769 | 3/13/2011 19:55:01 | 25.054 |
| 3/17/2011 14:06:01 | 31.832 | 3/13/2011 20:15:01 | 25.054 |
| 3/17/2011 14:26:01 | 31.957 | 3/13/2011 20:35:01 | 25.054 |
| 3/17/2011 14:46:01 | 31.645 | 3/13/2011 20:55:01 | 25.054 |
| 3/17/2011 15:06:01 | 31.208 | 3/13/2011 21:15:01 | 25.054 |
| 3/17/2011 15:26:01 | 30.583 | 3/13/2011 21:35:01 | 24.992 |
| 3/17/2011 15:46:01 | 30.209 | 3/13/2011 21:55:01 | 24.992 |
| 3/17/2011 16:06:01 | 29.334 | 3/13/2011 22:15:01 | 24.992 |
| 3/17/2011 16:26:01 | 29.022 | 3/13/2011 22:35:01 | 24.992 |
| 3/17/2011 16:46:01 | 28.585 | 3/13/2011 22:55:01 | 24.929 |
| 3/17/2011 17:06:01 | 28.273 | 3/13/2011 23:15:01 | 24.929 |
| 3/17/2011 17:26:01 | 28.273 | 3/13/2011 23:35:01 | 24.867 |
| 3/17/2011 17:46:01 | 27.648 | 3/13/2011 23:55:01 | 24.867 |
| 3/17/2011 18:06:01 | 25.461 | 3/14/2011 00:15:01 | 24.867 |
| 3/17/2011 18:26:01 | 24.148 | 3/14/2011 00:35:01 | 24.867 |
| 3/17/2011 18:46:01 | 23.898 | 3/14/2011 00:55:01 | 24.804 |
| 3/17/2011 19:06:01 | 23.961 | 3/14/2011 01:15:01 | 24.804 |
| 3/17/2011 19:26:01 | 24.086 | 3/14/2011 01:35:01 | 24.804 |
| 3/17/2011 19:46:01 | 24.023 | 3/14/2011 01:55:01 | 24.742 |
| 3/17/2011 20:06:01 | 23.961 | 3/14/2011 02:15:01 | 24.742 |
| 3/17/2011 20:26:01 | 23.961 | 3/14/2011 02:35:01 | 24.742 |
| 3/17/2011 20:46:01 | 23.898 | 3/14/2011 02:55:01 | 24.742 |
| 3/17/2011 21:06:01 | 23.961 | 3/14/2011 03:15:01 | 24.679 |
| 3/17/2011 21:26:01 | 23.773 | 3/14/2011 03:35:01 | 24.679 |
| 3/17/2011 21:46:01 | 23.711 | 3/14/2011 03:55:01 | 24.679 |
| 3/17/2011 22:06:01 | 23.711 | 3/14/2011 04:15:01 | 24.617 |
| 3/17/2011 22:26:01 | 23.836 | 3/14/2011 04:35:01 | 24.617 |
| 3/17/2011 22:46:01 | 23.836 | 3/14/2011 04:55:01 | 24.617 |
| 3/17/2011 23:06:01 | 23.898 | 3/14/2011 05:15:01 | 24.617 |
| 3/17/2011 23:26:01 | 24.086 | 3/14/2011 05:35:01 | 24.617 |
| 3/17/2011 23:46:01 | 24.086 | 3/14/2011 05:55:01 | 24.617 |
| 3/18/2011 00:06:01 | 23.961 | 3/14/2011 06:15:01 | 24.554 |
| 3/18/2011 00:26:01 | 23.836 | 3/14/2011 06:35:01 | 24.554 |
| 3/18/2011 00:46:01 | 23.773 | 3/14/2011 06:55:01 | 24.554 |
| 3/18/2011 01:06:01 | 23.836 | 3/14/2011 07:15:01 | 24.554 |
| 3/18/2011 01:26:01 | 23.836 | 3/14/2011 07:35:01 | 24.554 |

|                    |        |                    |        |
|--------------------|--------|--------------------|--------|
| 3/18/2011 01:46:01 | 23.836 | 3/14/2011 07:55:01 | 24.492 |
| 3/18/2011 02:06:01 | 23.961 | 3/14/2011 08:15:01 | 24.492 |
| 3/18/2011 02:26:01 | 24.023 | 3/14/2011 08:35:01 | 24.492 |
| 3/18/2011 02:46:01 | 23.898 | 3/14/2011 08:55:01 | 24.492 |
| 3/18/2011 03:06:01 | 23.773 | 3/14/2011 09:15:01 | 24.492 |
| 3/18/2011 03:26:01 | 23.711 | 3/14/2011 09:35:01 | 24.492 |
| 3/18/2011 03:46:01 | 23.523 | 3/14/2011 09:55:01 | 24.492 |
| 3/18/2011 04:06:01 | 23.273 | 3/14/2011 10:15:01 | 24.492 |
| 3/18/2011 04:26:01 | 22.898 | 3/14/2011 10:35:01 | 24.492 |
| 3/18/2011 04:46:01 | 22.523 | 3/14/2011 10:55:01 | 24.492 |
| 3/18/2011 05:06:01 | 22.273 | 3/14/2011 11:15:01 | 24.492 |
| 3/18/2011 05:26:01 | 22.147 | 3/14/2011 11:35:01 | 24.492 |
| 3/18/2011 05:46:01 | 22.147 | 3/14/2011 11:55:01 | 24.554 |
| 3/18/2011 06:06:01 | 22.022 | 3/14/2011 12:15:01 | 24.554 |
| 3/18/2011 06:26:01 | 21.522 | 3/14/2011 12:35:01 | 24.554 |
| 3/18/2011 06:46:01 | 21.897 | 3/14/2011 12:55:01 | 24.554 |
| 3/18/2011 07:06:01 | 22.523 | 3/14/2011 13:15:01 | 24.554 |
| 3/18/2011 07:26:01 | 23.023 | 3/14/2011 13:35:01 | 24.617 |
| 3/18/2011 07:46:01 | 23.648 | 3/14/2011 13:55:01 | 24.617 |
| 3/18/2011 08:06:01 | 23.898 | 3/14/2011 14:15:01 | 24.617 |
| 3/18/2011 08:26:01 | 24.148 | 3/14/2011 14:35:01 | 24.679 |
| 3/18/2011 08:46:01 | 24.586 | 3/14/2011 14:55:01 | 24.679 |
| 3/18/2011 09:06:01 | 25.024 | 3/14/2011 15:15:01 | 24.679 |
| 3/18/2011 09:26:01 | 25.586 | 3/14/2011 15:35:01 | 24.742 |
| 3/18/2011 09:46:01 | 26.086 | 3/14/2011 15:55:01 | 24.742 |
| 3/18/2011 10:06:01 | 26.586 | 3/14/2011 16:15:01 | 24.742 |
| 3/18/2011 10:26:01 | 27.398 | 3/14/2011 16:35:01 | 24.804 |
| 3/18/2011 10:46:01 | 27.773 | 3/14/2011 16:55:01 | 24.804 |
| 3/18/2011 11:06:01 | 28.960 | 3/14/2011 17:15:01 | 24.804 |
| 3/18/2011 11:26:01 | 28.772 | 3/14/2011 17:35:01 | 24.804 |
| 3/18/2011 11:46:01 | 28.835 | 3/14/2011 17:55:01 | 24.867 |
| 3/18/2011 12:06:01 | 28.960 | 3/14/2011 18:15:01 | 24.867 |
| 3/18/2011 12:26:01 | 28.585 | 3/14/2011 18:35:01 | 24.867 |
| 3/18/2011 12:46:01 | 29.022 | 3/14/2011 18:55:01 | 24.867 |
| 3/18/2011 13:06:01 | 29.459 | 3/14/2011 19:15:01 | 24.929 |
| 3/18/2011 13:26:01 | 29.210 | 3/14/2011 19:35:01 | 24.929 |
| 3/18/2011 13:46:01 | 30.583 | 3/14/2011 19:55:01 | 24.929 |
| 3/18/2011 14:06:01 | 30.708 | 3/14/2011 20:15:01 | 24.929 |
| 3/18/2011 14:26:01 | 30.646 | 3/14/2011 20:35:01 | 24.929 |
| 3/18/2011 14:46:01 | 30.521 | 3/14/2011 20:55:01 | 24.929 |
| 3/18/2011 15:06:01 | 29.397 | 3/14/2011 21:15:01 | 24.929 |
| 3/18/2011 15:26:01 | 28.710 | 3/14/2011 21:35:01 | 24.929 |
| 3/18/2011 15:46:01 | 28.210 | 3/14/2011 21:55:01 | 24.992 |
| 3/18/2011 16:06:01 | 28.148 | 3/14/2011 22:15:01 | 24.929 |
| 3/18/2011 16:26:01 | 27.773 | 3/14/2011 22:35:01 | 24.929 |
| 3/18/2011 16:46:01 | 27.710 | 3/14/2011 22:55:01 | 24.929 |
| 3/18/2011 17:06:01 | 27.586 | 3/14/2011 23:15:01 | 24.929 |
| 3/18/2011 17:26:01 | 27.523 | 3/14/2011 23:35:01 | 24.929 |
| 3/18/2011 17:46:01 | 27.461 | 3/14/2011 23:55:01 | 24.929 |
| 3/18/2011 18:06:01 | 27.086 | 3/15/2011 00:15:01 | 24.929 |

|                    |        |                    |        |
|--------------------|--------|--------------------|--------|
| 3/18/2011 18:26:01 | 26.273 | 3/15/2011 00:35:01 | 24.929 |
| 3/18/2011 18:46:01 | 25.649 | 3/15/2011 00:55:01 | 24.929 |
| 3/18/2011 19:06:01 | 25.336 | 3/15/2011 01:15:01 | 24.929 |
| 3/18/2011 19:26:01 | 24.961 | 3/15/2011 01:35:01 | 24.867 |
| 3/18/2011 19:46:01 | 24.586 | 3/15/2011 01:55:01 | 24.867 |
| 3/18/2011 20:06:01 | 24.273 | 3/15/2011 02:15:01 | 24.867 |
| 3/18/2011 20:26:01 | 23.961 | 3/15/2011 02:35:01 | 24.867 |
| 3/18/2011 20:46:01 | 23.773 | 3/15/2011 02:55:01 | 24.867 |
| 3/18/2011 21:06:01 | 23.648 | 3/15/2011 03:15:01 | 24.867 |
| 3/18/2011 21:26:01 | 23.461 | 3/15/2011 03:35:01 | 24.804 |
| 3/18/2011 21:46:01 | 23.523 | 3/15/2011 03:55:01 | 24.804 |
| 3/18/2011 22:06:01 | 23.586 | 3/15/2011 04:15:01 | 24.804 |
| 3/18/2011 22:26:01 | 23.523 | 3/15/2011 04:35:01 | 24.804 |
| 3/18/2011 22:46:01 | 23.461 | 3/15/2011 04:55:01 | 24.804 |
| 3/18/2011 23:06:01 | 23.398 | 3/15/2011 05:15:01 | 24.804 |
| 3/18/2011 23:26:01 | 23.586 | 3/15/2011 05:35:01 | 24.742 |
| 3/18/2011 23:46:01 | 23.648 | 3/15/2011 05:55:01 | 24.742 |
| 3/19/2011 00:06:01 | 23.523 | 3/15/2011 06:15:01 | 24.742 |
| 3/19/2011 00:26:01 | 23.523 | 3/15/2011 06:35:01 | 24.742 |
| 3/19/2011 00:46:01 | 23.398 | 3/15/2011 06:55:01 | 24.742 |
| 3/19/2011 01:06:01 | 23.086 | 3/15/2011 07:15:01 | 24.742 |
| 3/19/2011 01:26:01 | 22.835 | 3/15/2011 07:35:01 | 24.742 |
| 3/19/2011 01:46:01 | 22.710 | 3/15/2011 07:55:01 | 24.679 |
| 3/19/2011 02:06:01 | 22.835 | 3/15/2011 08:15:01 | 24.679 |
| 3/19/2011 02:26:01 | 22.960 | 3/15/2011 08:35:01 | 24.679 |
| 3/19/2011 02:46:01 | 22.960 | 3/15/2011 08:55:01 | 24.679 |
| 3/19/2011 03:06:01 | 22.960 | 3/15/2011 09:15:01 | 24.679 |
| 3/19/2011 03:26:01 | 22.960 | 3/15/2011 09:35:01 | 24.679 |
| 3/19/2011 03:46:01 | 22.898 | 3/15/2011 09:55:01 | 24.679 |
| 3/19/2011 04:06:01 | 22.835 | 3/15/2011 10:15:01 | 24.679 |
| 3/19/2011 04:26:01 | 22.710 | 3/15/2011 10:35:01 | 24.679 |
| 3/19/2011 04:46:01 | 22.710 | 3/15/2011 10:55:01 | 24.679 |
| 3/19/2011 05:06:01 | 22.585 | 3/15/2011 11:15:01 | 24.679 |
| 3/19/2011 05:26:01 | 22.398 | 3/15/2011 11:35:01 | 24.679 |
| 3/19/2011 05:46:01 | 21.835 | 3/15/2011 11:55:01 | 24.679 |
| 3/19/2011 06:06:01 | 21.585 | 3/15/2011 12:15:01 | 24.742 |
| 3/19/2011 06:26:01 | 21.522 | 3/15/2011 12:35:01 | 24.742 |
| 3/19/2011 06:46:01 | 21.897 | 3/15/2011 12:55:01 | 24.742 |
| 3/19/2011 07:06:01 | 22.273 | 3/15/2011 13:15:01 | 24.804 |
| 3/19/2011 07:26:01 | 22.960 | 3/15/2011 13:35:01 | 24.804 |
| 3/19/2011 07:46:01 | 23.898 | 3/15/2011 13:55:01 | 24.804 |
| 3/19/2011 08:06:01 | 24.711 | 3/15/2011 14:15:01 | 24.804 |
| 3/19/2011 08:26:01 | 25.461 | 3/15/2011 14:35:01 | 24.867 |
| 3/19/2011 08:46:01 | 26.273 | 3/15/2011 14:55:01 | 24.867 |
| 3/19/2011 09:06:01 | 26.836 | 3/15/2011 15:15:01 | 24.867 |
| 3/19/2011 09:26:01 | 27.211 | 3/15/2011 15:35:01 | 24.929 |
| 3/19/2011 09:46:01 | 27.648 | 3/15/2011 15:55:01 | 24.929 |
| 3/19/2011 10:06:01 | 28.023 | 3/15/2011 16:15:01 | 24.929 |
| 3/19/2011 10:26:01 | 28.647 | 3/15/2011 16:35:01 | 24.992 |
| 3/19/2011 10:46:01 | 28.772 | 3/15/2011 16:55:01 | 24.992 |

|                    |        |                    |        |
|--------------------|--------|--------------------|--------|
| 3/19/2011 11:06:01 | 29.210 | 3/15/2011 17:15:01 | 24.992 |
| 3/19/2011 11:26:01 | 29.522 | 3/15/2011 17:35:01 | 24.992 |
| 3/19/2011 11:46:01 | 30.146 | 3/15/2011 17:55:01 | 25.054 |
| 3/19/2011 12:06:01 | 30.583 | 3/15/2011 18:15:01 | 25.054 |
| 3/19/2011 12:26:01 | 30.958 | 3/15/2011 18:35:01 | 25.054 |
| 3/19/2011 12:46:01 | 31.270 | 3/15/2011 18:55:01 | 25.054 |
| 3/19/2011 13:06:01 | 31.520 | 3/15/2011 19:15:01 | 25.117 |
| 3/19/2011 13:26:01 | 31.894 | 3/15/2011 19:35:01 | 25.117 |
| 3/19/2011 13:46:01 | 31.894 | 3/15/2011 19:55:01 | 25.117 |
| 3/19/2011 14:06:01 | 31.957 | 3/15/2011 20:15:01 | 25.117 |
| 3/19/2011 14:26:01 | 31.832 | 3/15/2011 20:35:01 | 25.117 |
| 3/19/2011 14:46:01 | 31.707 | 3/15/2011 20:55:01 | 25.117 |
| 3/19/2011 15:06:01 | 31.083 | 3/15/2011 21:15:01 | 25.117 |
| 3/19/2011 15:26:01 | 30.334 | 3/15/2011 21:35:01 | 25.179 |
| 3/19/2011 15:46:01 | 29.647 | 3/15/2011 21:55:01 | 25.179 |
| 3/19/2011 16:06:01 | 29.085 | 3/15/2011 22:15:01 | 25.179 |
| 3/19/2011 16:26:01 | 28.647 | 3/15/2011 22:35:01 | 25.179 |
| 3/19/2011 16:46:01 | 28.085 | 3/15/2011 22:55:01 | 25.179 |
| 3/19/2011 17:06:01 | 27.523 | 3/15/2011 23:15:01 | 25.117 |
| 3/19/2011 17:26:01 | 27.086 | 3/15/2011 23:35:01 | 25.117 |
| 3/19/2011 17:46:01 | 26.773 | 3/15/2011 23:55:01 | 25.117 |
| 3/19/2011 18:06:01 | 26.523 | 3/16/2011 00:15:01 | 25.117 |
| 3/19/2011 18:26:01 | 26.086 | 3/16/2011 00:35:01 | 25.117 |
| 3/19/2011 18:46:01 | 25.524 | 3/16/2011 00:55:01 | 25.117 |
| 3/19/2011 19:06:01 | 25.149 | 3/16/2011 01:15:01 | 25.117 |
| 3/19/2011 19:26:01 | 24.711 | 3/16/2011 01:35:01 | 25.054 |
| 3/19/2011 19:46:01 | 24.398 | 3/16/2011 01:55:01 | 25.054 |
| 3/19/2011 20:06:01 | 24.086 | 3/16/2011 02:15:01 | 25.054 |
| 3/19/2011 20:26:01 | 23.898 | 3/16/2011 02:35:01 | 25.054 |
| 3/19/2011 20:46:01 | 23.648 | 3/16/2011 02:55:01 | 25.054 |
| 3/19/2011 21:06:01 | 23.586 | 3/16/2011 03:15:01 | 25.054 |
| 3/19/2011 21:26:01 | 23.586 | 3/16/2011 03:35:01 | 24.992 |
| 3/19/2011 21:46:01 | 23.648 | 3/16/2011 03:55:01 | 24.992 |
| 3/19/2011 22:06:01 | 23.523 | 3/16/2011 04:15:01 | 24.992 |
| 3/19/2011 22:26:01 | 23.523 | 3/16/2011 04:35:01 | 24.992 |
| 3/19/2011 22:46:01 | 23.773 | 3/16/2011 04:55:01 | 24.992 |
| 3/19/2011 23:06:01 | 23.898 | 3/16/2011 05:15:01 | 24.929 |
| 3/19/2011 23:26:01 | 23.836 | 3/16/2011 05:35:01 | 24.929 |
| 3/19/2011 23:46:01 | 23.773 | 3/16/2011 05:55:01 | 24.929 |
| 3/20/2011 00:06:01 | 23.711 | 3/16/2011 06:15:01 | 24.929 |
| 3/20/2011 00:26:01 | 23.711 | 3/16/2011 06:35:01 | 24.929 |
| 3/20/2011 00:46:01 | 23.586 | 3/16/2011 06:55:01 | 24.929 |
| 3/20/2011 01:06:01 | 23.586 | 3/16/2011 07:15:01 | 24.867 |
| 3/20/2011 01:26:01 | 23.336 | 3/16/2011 07:35:01 | 24.867 |
| 3/20/2011 01:46:01 | 22.898 | 3/16/2011 07:55:01 | 24.867 |
| 3/20/2011 02:06:01 | 22.460 | 3/16/2011 08:15:01 | 24.867 |
| 3/20/2011 02:26:01 | 22.210 | 3/16/2011 08:35:01 | 24.867 |
| 3/20/2011 02:46:01 | 21.960 | 3/16/2011 08:55:01 | 24.804 |
| 3/20/2011 03:06:01 | 21.585 | 3/16/2011 09:15:01 | 24.804 |
| 3/20/2011 03:26:01 | 21.334 | 3/16/2011 09:35:01 | 24.804 |

|                    |        |                    |        |
|--------------------|--------|--------------------|--------|
| 3/20/2011 03:46:01 | 21.147 | 3/16/2011 09:55:01 | 24.804 |
| 3/20/2011 04:06:01 | 20.896 | 3/16/2011 10:15:01 | 24.804 |
| 3/20/2011 04:26:01 | 20.771 | 3/16/2011 10:35:01 | 24.804 |
| 3/20/2011 04:46:01 | 20.646 | 3/16/2011 10:55:01 | 24.804 |
| 3/20/2011 05:06:01 | 20.396 | 3/16/2011 11:15:01 | 24.804 |
| 3/20/2011 05:26:01 | 20.146 | 3/16/2011 11:35:01 | 24.804 |
| 3/20/2011 05:46:01 | 19.958 | 3/16/2011 11:55:01 | 24.804 |
| 3/20/2011 06:06:01 | 19.833 | 3/16/2011 12:15:01 | 24.804 |
| 3/20/2011 06:26:01 | 19.895 | 3/16/2011 12:35:01 | 24.867 |
| 3/20/2011 06:46:01 | 20.333 | 3/16/2011 12:55:01 | 24.867 |
| 3/20/2011 07:06:01 | 20.959 | 3/16/2011 13:15:01 | 24.867 |
| 3/20/2011 07:26:01 | 21.835 | 3/16/2011 13:35:01 | 24.867 |
| 3/20/2011 07:46:01 | 22.898 | 3/16/2011 13:55:01 | 24.929 |
| 3/20/2011 08:06:01 | 23.836 | 3/16/2011 14:15:01 | 24.929 |
| 3/20/2011 08:26:01 | 24.774 | 3/16/2011 14:35:01 | 24.929 |
| 3/20/2011 08:46:01 | 25.774 | 3/16/2011 14:55:01 | 24.929 |
| 3/20/2011 09:06:01 | 26.211 | 3/16/2011 15:15:01 | 24.992 |
| 3/20/2011 09:26:01 | 26.898 | 3/16/2011 15:35:01 | 24.992 |
| 3/20/2011 09:46:01 | 27.461 | 3/16/2011 15:55:01 | 24.992 |
| 3/20/2011 10:06:01 | 28.085 | 3/16/2011 16:15:01 | 24.992 |
| 3/20/2011 10:26:01 | 28.772 | 3/16/2011 16:35:01 | 25.054 |
| 3/20/2011 10:46:01 | 29.210 | 3/16/2011 16:55:01 | 25.054 |
| 3/20/2011 11:06:01 | 29.709 | 3/16/2011 17:15:01 | 25.054 |
| 3/20/2011 11:26:01 | 30.146 | 3/16/2011 17:35:01 | 25.054 |
| 3/20/2011 11:46:01 | 30.646 | 3/16/2011 17:55:01 | 25.054 |
| 3/20/2011 12:06:01 | 30.958 | 3/16/2011 18:15:01 | 25.117 |
| 3/20/2011 12:26:01 | 31.332 | 3/16/2011 18:35:01 | 25.117 |
| 3/20/2011 12:46:01 | 31.520 | 3/16/2011 18:55:01 | 25.117 |
| 3/20/2011 13:06:01 | 31.769 | 3/16/2011 19:15:01 | 25.117 |
| 3/20/2011 13:26:01 | 31.957 | 3/16/2011 19:35:01 | 25.117 |
| 3/20/2011 13:46:01 | 32.081 | 3/16/2011 19:55:01 | 25.179 |
| 3/20/2011 14:06:01 | 32.019 | 3/16/2011 20:15:01 | 25.179 |
| 3/20/2011 14:26:01 | 31.707 | 3/16/2011 20:35:01 | 25.179 |
| 3/20/2011 14:46:01 | 31.645 | 3/16/2011 20:55:01 | 25.179 |
| 3/20/2011 15:06:01 | 31.020 | 3/16/2011 21:15:01 | 25.179 |
| 3/20/2011 15:26:01 | 30.084 | 3/16/2011 21:35:01 | 25.179 |
| 3/20/2011 15:46:01 | 29.647 | 3/16/2011 21:55:01 | 25.179 |
| 3/20/2011 16:06:01 | 29.210 | 3/16/2011 22:15:01 | 25.179 |
| 3/20/2011 16:26:01 | 28.585 | 3/16/2011 22:35:01 | 25.179 |
| 3/20/2011 16:46:01 | 27.960 | 3/16/2011 22:55:01 | 25.179 |
| 3/20/2011 17:06:01 | 27.523 | 3/16/2011 23:15:01 | 25.179 |
| 3/20/2011 17:26:01 | 27.023 | 3/16/2011 23:35:01 | 25.179 |
| 3/20/2011 17:46:01 | 26.711 | 3/16/2011 23:55:01 | 25.117 |
| 3/20/2011 18:06:01 | 26.461 | 3/17/2011 00:15:01 | 25.117 |
| 3/20/2011 18:26:01 | 25.961 | 3/17/2011 00:35:01 | 25.117 |
| 3/20/2011 18:46:01 | 25.461 | 3/17/2011 00:55:01 | 25.117 |
| 3/20/2011 19:06:01 | 25.024 | 3/17/2011 01:15:01 | 25.117 |
| 3/20/2011 19:26:01 | 24.586 | 3/17/2011 01:35:01 | 25.117 |
| 3/20/2011 19:46:01 | 24.211 | 3/17/2011 01:55:01 | 25.117 |
| 3/20/2011 20:06:01 | 23.898 | 3/17/2011 02:15:01 | 25.054 |

|                    |        |                    |        |
|--------------------|--------|--------------------|--------|
| 3/20/2011 20:26:01 | 23.648 | 3/17/2011 02:35:01 | 25.054 |
| 3/20/2011 20:46:01 | 23.461 | 3/17/2011 02:55:01 | 25.054 |
| 3/20/2011 21:06:01 | 23.273 | 3/17/2011 03:15:01 | 25.054 |
| 3/20/2011 21:26:01 | 23.023 | 3/17/2011 03:35:01 | 25.054 |
| 3/20/2011 21:46:01 | 22.835 | 3/17/2011 03:55:01 | 25.054 |
| 3/20/2011 22:06:01 | 22.648 | 3/17/2011 04:15:01 | 24.992 |
| 3/20/2011 22:26:01 | 22.523 | 3/17/2011 04:35:01 | 24.992 |
| 3/20/2011 22:46:01 | 22.335 | 3/17/2011 04:55:01 | 24.992 |
| 3/20/2011 23:06:01 | 22.335 | 3/17/2011 05:15:01 | 24.992 |
| 3/20/2011 23:26:01 | 22.273 | 3/17/2011 05:35:01 | 24.992 |
| 3/20/2011 23:46:01 | 22.460 | 3/17/2011 05:55:01 | 24.929 |
| 3/21/2011 00:06:01 | 22.585 | 3/17/2011 06:15:01 | 24.929 |
| 3/21/2011 00:26:01 | 23.086 | 3/17/2011 06:35:01 | 24.929 |
| 3/21/2011 00:46:01 | 23.398 | 3/17/2011 06:55:01 | 24.867 |
| 3/21/2011 01:06:01 | 23.461 | 3/17/2011 07:15:01 | 24.867 |
| 3/21/2011 01:26:01 | 23.461 | 3/17/2011 07:35:01 | 24.867 |
| 3/21/2011 01:46:01 | 23.273 | 3/17/2011 07:55:01 | 24.867 |
| 3/21/2011 02:06:01 | 23.086 | 3/17/2011 08:15:01 | 24.804 |
| 3/21/2011 02:26:01 | 22.960 | 3/17/2011 08:35:01 | 24.804 |
| 3/21/2011 02:46:01 | 22.710 | 3/17/2011 08:55:01 | 24.804 |
| 3/21/2011 03:06:01 | 22.460 | 3/17/2011 09:15:01 | 24.804 |
| 3/21/2011 03:26:01 | 22.210 | 3/17/2011 09:35:01 | 24.804 |
| 3/21/2011 03:46:01 | 22.022 | 3/17/2011 09:55:01 | 24.742 |
| 3/21/2011 04:06:01 | 21.897 | 3/17/2011 10:15:01 | 24.742 |
| 3/21/2011 04:26:01 | 21.897 | 3/17/2011 10:35:01 | 24.742 |
| 3/21/2011 04:46:01 | 21.772 | 3/17/2011 10:55:01 | 24.742 |
| 3/21/2011 05:06:01 | 21.522 | 3/17/2011 11:15:01 | 24.742 |
| 3/21/2011 05:26:01 | 21.334 | 3/17/2011 11:35:01 | 24.804 |
| 3/21/2011 05:46:01 | 21.084 | 3/17/2011 11:55:01 | 24.804 |
| 3/21/2011 06:06:01 | 20.834 | 3/17/2011 12:15:01 | 24.804 |
| 3/21/2011 06:26:01 | 20.771 | 3/17/2011 12:35:01 | 24.804 |
| 3/21/2011 06:46:01 | 21.022 | 3/17/2011 12:55:01 | 24.867 |
| 3/21/2011 07:06:01 | 21.647 | 3/17/2011 13:15:01 | 24.867 |
| 3/21/2011 07:26:01 | 22.398 | 3/17/2011 13:35:01 | 24.867 |
| 3/21/2011 07:46:01 | 23.398 | 3/17/2011 13:55:01 | 24.929 |
| 3/21/2011 08:06:01 | 24.273 | 3/17/2011 14:15:01 | 24.929 |
| 3/21/2011 08:26:01 | 24.711 | 3/17/2011 14:35:01 | 24.929 |
| 3/21/2011 08:46:01 | 25.524 | 3/17/2011 14:55:01 | 24.992 |
| 3/21/2011 09:06:01 | 25.961 | 3/17/2011 15:15:01 | 24.992 |
| 3/21/2011 09:26:01 | 26.398 | 3/17/2011 15:35:01 | 24.992 |
| 3/21/2011 09:46:01 | 26.836 | 3/17/2011 15:55:01 | 24.992 |
| 3/21/2011 10:06:01 | 27.835 | 3/17/2011 16:15:01 | 25.054 |
| 3/21/2011 10:42:01 | 29.238 | 3/17/2011 16:35:01 | 25.054 |
| 3/21/2011 11:12:01 | 30.112 | 3/17/2011 16:55:01 | 25.054 |
| 3/21/2011 11:42:01 | 30.737 | 3/17/2011 17:15:01 | 25.117 |
| 3/21/2011 12:12:01 | 31.236 | 3/17/2011 17:35:01 | 25.117 |
| 3/21/2011 12:42:01 | 31.673 | 3/17/2011 17:55:01 | 25.117 |
| 3/21/2011 13:12:01 | 31.985 | 3/17/2011 18:15:01 | 25.179 |
| 3/21/2011 13:42:01 | 32.235 | 3/17/2011 18:35:01 | 25.179 |
| 3/21/2011 14:12:01 | 32.360 | 3/17/2011 18:55:01 | 25.179 |

|                    |        |                    |        |
|--------------------|--------|--------------------|--------|
| 3/21/2011 14:42:01 | 31.860 | 3/17/2011 19:15:01 | 25.179 |
| 3/21/2011 15:12:01 | 30.862 | 3/17/2011 19:35:01 | 25.179 |
| 3/21/2011 15:42:01 | 29.925 | 3/17/2011 19:55:01 | 25.242 |
| 3/21/2011 16:12:01 | 28.926 | 3/17/2011 20:15:01 | 25.179 |
| 3/21/2011 16:42:01 | 27.864 | 3/17/2011 20:35:01 | 25.242 |
| 3/21/2011 17:12:01 | 26.990 | 3/17/2011 20:55:01 | 25.179 |
| 3/21/2011 17:42:01 | 26.365 | 3/17/2011 21:15:01 | 25.242 |
| 3/21/2011 18:12:01 | 25.740 | 3/17/2011 21:35:01 | 25.179 |
| 3/21/2011 18:42:01 | 25.115 | 3/17/2011 21:55:01 | 25.179 |
| 3/21/2011 19:12:01 | 24.677 | 3/17/2011 22:15:01 | 25.179 |
| 3/21/2011 19:42:01 | 24.052 | 3/17/2011 22:35:01 | 25.179 |
| 3/21/2011 20:12:01 | 23.552 | 3/17/2011 22:55:01 | 25.179 |
| 3/21/2011 20:42:01 | 23.240 | 3/17/2011 23:15:01 | 25.179 |
| 3/21/2011 21:12:01 | 23.302 | 3/17/2011 23:35:01 | 25.179 |
| 3/21/2011 21:42:01 | 23.427 | 3/17/2011 23:55:01 | 25.117 |
| 3/21/2011 22:12:01 | 23.302 | 3/18/2011 00:15:01 | 25.117 |
| 3/21/2011 22:42:01 | 23.615 | 3/18/2011 00:35:01 | 25.117 |
| 3/21/2011 23:12:01 | 23.677 | 3/18/2011 00:55:01 | 25.117 |
| 3/21/2011 23:42:01 | 23.865 | 3/18/2011 01:15:01 | 25.117 |
| 3/22/2011 00:12:01 | 23.865 | 3/18/2011 01:35:01 | 25.117 |
| 3/22/2011 00:42:01 | 23.490 | 3/18/2011 01:55:01 | 25.054 |
| 3/22/2011 01:12:01 | 23.114 | 3/18/2011 02:15:01 | 25.054 |
| 3/22/2011 01:42:01 | 23.052 | 3/18/2011 02:35:01 | 25.054 |
| 3/22/2011 02:12:01 | 22.927 | 3/18/2011 02:55:01 | 25.054 |
| 3/22/2011 02:42:01 | 23.052 | 3/18/2011 03:15:01 | 25.054 |
| 3/22/2011 03:12:01 | 22.802 | 3/18/2011 03:35:01 | 25.054 |
| 3/22/2011 03:42:01 | 22.677 | 3/18/2011 03:55:01 | 25.054 |
| 3/22/2011 04:12:01 | 22.489 | 3/18/2011 04:15:01 | 24.992 |
| 3/22/2011 04:42:01 | 22.489 | 3/18/2011 04:35:01 | 24.992 |
| 3/22/2011 05:12:01 | 22.677 | 3/18/2011 04:55:01 | 24.992 |
| 3/22/2011 05:42:01 | 22.489 | 3/18/2011 05:15:01 | 24.992 |
| 3/22/2011 06:12:01 | 22.302 | 3/18/2011 05:35:01 | 24.992 |
| 3/22/2011 06:42:01 | 22.802 | 3/18/2011 05:55:01 | 24.929 |
| 3/22/2011 07:12:01 | 23.740 | 3/18/2011 06:15:01 | 24.929 |
| 3/22/2011 07:42:01 | 24.865 | 3/18/2011 06:35:01 | 24.929 |
| 3/22/2011 08:12:01 | 26.052 | 3/18/2011 06:55:01 | 24.929 |
| 3/22/2011 08:42:01 | 27.177 | 3/18/2011 07:15:01 | 24.929 |
| 3/22/2011 09:12:01 | 27.802 | 3/18/2011 07:35:01 | 24.867 |
| 3/22/2011 09:42:01 | 28.364 | 3/18/2011 07:55:01 | 24.867 |
| 3/22/2011 10:12:01 | 29.113 | 3/18/2011 08:15:01 | 24.867 |
| 3/22/2011 10:42:01 | 29.800 | 3/18/2011 08:35:01 | 24.867 |
| 3/22/2011 11:12:01 | 29.863 | 3/18/2011 08:55:01 | 24.804 |
| 3/22/2011 11:42:01 | 30.799 | 3/18/2011 09:15:01 | 24.804 |
| 3/22/2011 12:12:01 | 30.986 | 3/18/2011 09:35:01 | 24.804 |
| 3/22/2011 12:42:01 | 31.299 | 3/18/2011 09:44:01 | 25.609 |
| 3/22/2011 13:12:01 | 31.611 | 3/18/2011 10:14:01 | 25.609 |
| 3/22/2011 13:42:01 | 31.611 | 3/18/2011 10:44:01 | 25.609 |
| 3/22/2011 14:12:01 | 32.110 | 3/18/2011 11:14:01 | 25.609 |
| 3/22/2011 14:42:01 | 31.673 | 3/18/2011 11:44:01 | 25.609 |
| 3/22/2011 15:12:01 | 30.487 | 3/18/2011 12:14:01 | 25.609 |



|                    |        |                    |        |
|--------------------|--------|--------------------|--------|
| 3/22/2011 15:42:01 | 29.426 | 3/18/2011 12:44:01 | 25.672 |
| 3/22/2011 16:12:01 | 28.614 | 3/18/2011 13:14:01 | 25.734 |
| 3/22/2011 16:42:01 | 27.802 | 3/18/2011 13:44:01 | 25.734 |
| 3/22/2011 17:12:01 | 27.115 | 3/18/2011 14:14:01 | 25.797 |
| 3/22/2011 17:42:01 | 26.365 | 3/18/2011 14:44:01 | 25.797 |
| 3/22/2011 18:12:01 | 25.490 | 3/18/2011 15:14:01 | 25.797 |
| 3/22/2011 18:42:01 | 25.052 | 3/18/2011 15:44:01 | 25.859 |
| 3/22/2011 19:12:01 | 24.427 | 3/18/2011 16:14:01 | 25.859 |
| 3/22/2011 19:42:01 | 23.927 | 3/18/2011 16:44:01 | 25.922 |
| 3/22/2011 20:12:01 | 23.927 | 3/18/2011 17:14:01 | 25.922 |
| 3/22/2011 20:42:01 | 24.177 | 3/18/2011 17:44:01 | 25.922 |
| 3/22/2011 21:12:01 | 24.302 | 3/18/2011 18:14:01 | 25.922 |
| 3/22/2011 21:42:01 | 24.115 | 3/18/2011 18:44:01 | 25.922 |
| 3/22/2011 22:12:01 | 23.990 | 3/18/2011 19:14:01 | 25.984 |
| 3/22/2011 22:42:01 | 24.052 | 3/18/2011 19:44:01 | 25.984 |
| 3/22/2011 23:12:01 | 23.802 | 3/18/2011 20:14:01 | 25.984 |
| 3/22/2011 23:42:01 | 23.677 | 3/18/2011 20:44:01 | 25.984 |
| 3/23/2011 00:12:01 | 23.802 | 3/18/2011 21:14:01 | 25.984 |
| 3/23/2011 00:42:01 | 23.677 | 3/18/2011 21:44:01 | 25.984 |
| 3/23/2011 01:12:01 | 23.615 | 3/18/2011 22:14:01 | 25.984 |
| 3/23/2011 01:42:01 | 23.865 | 3/18/2011 22:44:01 | 25.984 |
| 3/23/2011 02:12:01 | 23.990 | 3/18/2011 23:14:01 | 25.984 |
| 3/23/2011 02:42:01 | 23.802 | 3/18/2011 23:44:01 | 25.984 |
| 3/23/2011 03:12:01 | 23.740 | 3/19/2011 00:14:01 | 25.984 |
| 3/23/2011 03:42:01 | 23.552 | 3/19/2011 00:44:01 | 25.922 |
| 3/23/2011 04:12:01 | 23.302 | 3/19/2011 01:14:01 | 25.922 |
| 3/23/2011 04:42:01 | 23.052 | 3/19/2011 01:44:01 | 25.922 |
| 3/23/2011 05:12:01 | 22.864 | 3/19/2011 02:14:01 | 25.922 |
| 3/23/2011 05:42:01 | 22.677 | 3/19/2011 02:44:01 | 25.922 |
| 3/23/2011 06:12:01 | 22.614 | 3/19/2011 03:14:01 | 25.859 |
| 3/23/2011 06:42:01 | 23.114 | 3/19/2011 03:44:01 | 25.859 |
| 3/23/2011 07:12:01 | 24.115 | 3/19/2011 04:14:01 | 25.859 |
| 3/23/2011 07:42:01 | 25.052 | 3/19/2011 04:44:01 | 25.797 |
| 3/23/2011 08:12:01 | 25.740 | 3/19/2011 05:14:01 | 25.797 |
| 3/23/2011 08:42:01 | 26.490 | 3/19/2011 05:44:01 | 25.797 |
| 3/23/2011 09:12:01 | 27.802 | 3/19/2011 06:14:01 | 25.734 |
| 3/23/2011 09:42:01 | 28.926 | 3/19/2011 06:44:01 | 25.734 |
| 3/23/2011 10:12:01 | 28.426 | 3/19/2011 07:14:01 | 25.734 |
| 3/23/2011 10:42:01 | 30.487 | 3/19/2011 07:44:01 | 25.672 |
| 3/23/2011 11:12:01 | 31.923 | 3/19/2011 08:14:01 | 25.672 |
| 3/23/2011 11:42:01 | 31.985 | 3/19/2011 08:44:01 | 25.672 |
| 3/23/2011 12:12:01 | 30.986 | 3/19/2011 09:14:01 | 25.609 |
| 3/23/2011 12:42:01 | 30.862 | 3/19/2011 09:44:01 | 25.609 |
| 3/23/2011 13:12:01 | 32.859 | 3/19/2011 10:14:01 | 25.609 |
| 3/23/2011 13:42:01 | 33.358 | 3/19/2011 10:44:01 | 25.547 |
| 3/23/2011 14:12:01 | 33.108 | 3/19/2011 11:14:01 | 25.547 |
| 3/23/2011 14:42:01 | 32.484 | 3/19/2011 11:44:01 | 25.547 |
| 3/23/2011 15:12:01 | 30.549 | 3/19/2011 12:14:01 | 25.609 |
| 3/23/2011 15:42:01 | 29.113 | 3/19/2011 12:44:01 | 25.609 |
| 3/23/2011 16:12:01 | 28.239 | 3/19/2011 13:14:01 | 25.672 |

|                    |        |                    |        |
|--------------------|--------|--------------------|--------|
| 3/23/2011 16:42:01 | 27.552 | 3/19/2011 13:44:01 | 25.672 |
| 3/23/2011 17:12:01 | 27.115 | 3/19/2011 14:14:01 | 25.734 |
| 3/23/2011 17:42:01 | 26.677 | 3/19/2011 14:44:01 | 25.734 |
| 3/23/2011 18:12:01 | 26.115 | 3/19/2011 15:14:01 | 25.797 |
| 3/23/2011 18:42:01 | 25.677 | 3/19/2011 15:44:01 | 25.797 |
| 3/23/2011 19:12:01 | 25.240 | 3/19/2011 16:14:01 | 25.797 |
| 3/23/2011 19:42:01 | 24.927 | 3/19/2011 16:44:01 | 25.859 |
| 3/23/2011 20:12:01 | 24.740 | 3/19/2011 17:14:01 | 25.859 |
| 3/23/2011 20:42:01 | 24.740 | 3/19/2011 17:44:01 | 25.859 |
| 3/23/2011 21:12:01 | 24.740 | 3/19/2011 18:14:01 | 25.859 |
| 3/23/2011 21:42:01 | 25.115 | 3/19/2011 18:44:01 | 25.922 |
| 3/23/2011 22:12:01 | 24.615 | 3/19/2011 19:14:01 | 25.922 |
| 3/23/2011 22:42:01 | 24.052 | 3/19/2011 19:44:01 | 25.922 |
| 3/23/2011 23:12:01 | 23.677 | 3/19/2011 20:14:01 | 25.922 |
| 3/23/2011 23:42:01 | 23.677 | 3/19/2011 20:44:01 | 25.922 |
| 3/24/2011 00:12:01 | 23.740 | 3/19/2011 21:14:01 | 25.922 |
| 3/24/2011 00:42:01 | 23.427 | 3/19/2011 21:44:01 | 25.922 |
| 3/24/2011 01:12:01 | 23.240 | 3/19/2011 22:14:01 | 25.922 |
| 3/24/2011 01:42:01 | 23.177 | 3/19/2011 22:44:01 | 25.922 |
| 3/24/2011 02:12:01 | 22.927 | 3/19/2011 23:14:01 | 25.922 |
| 3/24/2011 02:42:01 | 22.739 | 3/19/2011 23:44:01 | 25.922 |
| 3/24/2011 03:12:01 | 22.614 | 3/20/2011 00:14:01 | 25.859 |
| 3/24/2011 03:42:01 | 22.427 | 3/20/2011 00:44:01 | 25.859 |
| 3/24/2011 04:12:01 | 22.239 | 3/20/2011 01:14:01 | 25.859 |
| 3/24/2011 04:42:01 | 21.989 | 3/20/2011 01:44:01 | 25.859 |
| 3/24/2011 05:12:01 | 21.739 | 3/20/2011 02:14:01 | 25.859 |
| 3/24/2011 05:42:01 | 21.614 | 3/20/2011 02:44:01 | 25.797 |
| 3/24/2011 06:12:01 | 21.739 | 3/20/2011 03:14:01 | 25.797 |
| 3/24/2011 06:42:01 | 22.552 | 3/20/2011 03:44:01 | 25.797 |
| 3/24/2011 07:12:01 | 23.365 | 3/20/2011 04:14:01 | 25.797 |
| 3/24/2011 07:42:01 | 24.302 | 3/20/2011 04:44:01 | 25.734 |
| 3/24/2011 08:12:01 | 25.365 | 3/20/2011 05:14:01 | 25.734 |
| 3/24/2011 08:42:01 | 26.615 | 3/20/2011 05:44:01 | 25.672 |
| 3/24/2011 09:12:01 | 27.739 | 3/20/2011 06:14:01 | 25.672 |
| 3/24/2011 09:42:01 | 28.801 | 3/20/2011 06:44:01 | 25.672 |
| 3/24/2011 10:12:01 | 29.238 | 3/20/2011 07:14:01 | 25.609 |
| 3/24/2011 10:42:01 | 29.675 | 3/20/2011 07:44:01 | 25.609 |
| 3/24/2011 11:12:01 | 29.925 | 3/20/2011 08:14:01 | 25.547 |
| 3/24/2011 11:42:01 | 30.425 | 3/20/2011 08:44:01 | 25.484 |
| 3/24/2011 12:12:01 | 29.613 | 3/20/2011 09:14:01 | 25.484 |
| 3/24/2011 12:42:01 | 31.049 | 3/20/2011 09:44:01 | 25.422 |
| 3/24/2011 13:12:01 | 32.672 | 3/20/2011 10:14:01 | 25.422 |
| 3/24/2011 13:42:01 | 32.921 | 3/20/2011 10:44:01 | 25.359 |
| 3/24/2011 14:12:01 | 32.921 | 3/20/2011 11:14:01 | 25.359 |
| 3/24/2011 14:42:01 | 31.548 | 3/20/2011 11:44:01 | 25.422 |
| 3/24/2011 15:12:01 | 31.299 | 3/20/2011 12:14:01 | 25.422 |
| 3/24/2011 15:42:01 | 29.675 | 3/20/2011 12:44:01 | 25.422 |
| 3/24/2011 16:12:01 | 28.864 | 3/20/2011 13:14:01 | 25.484 |
| 3/24/2011 16:42:01 | 28.489 | 3/20/2011 13:44:01 | 25.484 |
| 3/24/2011 17:12:01 | 28.052 | 3/20/2011 14:14:01 | 25.547 |

|                    |        |                    |        |
|--------------------|--------|--------------------|--------|
| 3/24/2011 17:42:01 | 27.302 | 3/20/2011 14:44:01 | 25.547 |
| 3/24/2011 18:12:01 | 26.802 | 3/20/2011 15:14:01 | 25.609 |
| 3/24/2011 18:42:01 | 26.240 | 3/20/2011 15:44:01 | 25.609 |
| 3/24/2011 19:12:01 | 25.802 | 3/20/2011 16:14:01 | 25.672 |
| 3/24/2011 19:42:01 | 25.303 | 3/20/2011 16:44:01 | 25.672 |
| 3/24/2011 20:12:01 | 24.990 | 3/20/2011 17:14:01 | 25.672 |
| 3/24/2011 20:42:01 | 24.677 | 3/20/2011 17:44:01 | 25.734 |
| 3/24/2011 21:12:01 | 24.677 | 3/20/2011 18:14:01 | 25.734 |
| 3/24/2011 21:42:01 | 24.802 | 3/20/2011 18:44:01 | 25.734 |
| 3/24/2011 22:12:01 | 24.615 | 3/20/2011 19:14:01 | 25.734 |
| 3/24/2011 22:42:01 | 24.365 | 3/20/2011 19:44:01 | 25.797 |
| 3/24/2011 23:12:01 | 24.490 | 3/20/2011 20:14:01 | 25.797 |
| 3/24/2011 23:42:01 | 24.365 | 3/20/2011 20:44:01 | 25.797 |
| 3/25/2011 00:12:01 | 24.240 | 3/20/2011 21:14:01 | 25.797 |
| 3/25/2011 00:42:01 | 23.927 | 3/20/2011 21:44:01 | 25.797 |
| 3/25/2011 01:12:01 | 23.740 | 3/20/2011 22:14:01 | 25.797 |
| 3/25/2011 01:42:01 | 23.990 | 3/20/2011 22:44:01 | 25.797 |
| 3/25/2011 02:12:01 | 22.614 | 3/20/2011 23:14:01 | 25.797 |
| 3/25/2011 02:42:01 | 21.551 | 3/20/2011 23:44:01 | 25.797 |
| 3/25/2011 03:12:01 | 21.238 | 3/21/2011 00:14:01 | 25.734 |
| 3/25/2011 03:42:01 | 21.301 | 3/21/2011 00:44:01 | 25.734 |
| 3/25/2011 04:12:01 | 21.426 | 3/21/2011 01:14:01 | 25.734 |
| 3/25/2011 04:42:01 | 21.488 | 3/21/2011 01:44:01 | 25.734 |
| 3/25/2011 05:12:01 | 21.551 | 3/21/2011 02:14:01 | 25.672 |
| 3/25/2011 05:42:01 | 21.551 | 3/21/2011 02:44:01 | 25.672 |
| 3/25/2011 06:12:01 | 21.551 | 3/21/2011 03:14:01 | 25.672 |
| 3/25/2011 06:42:01 | 21.739 | 3/21/2011 03:44:01 | 25.672 |
| 3/25/2011 07:12:01 | 22.427 | 3/21/2011 04:14:01 | 25.609 |
| 3/25/2011 07:42:01 | 23.302 | 3/21/2011 04:44:01 | 25.609 |
| 3/25/2011 08:12:01 | 24.115 | 3/21/2011 05:14:01 | 25.609 |
| 3/25/2011 08:42:01 | 25.178 | 3/21/2011 05:44:01 | 25.609 |
| 3/25/2011 09:12:01 | 26.240 | 3/21/2011 06:14:01 | 25.547 |
| 3/25/2011 09:42:01 | 27.052 | 3/21/2011 06:44:01 | 25.547 |
| 3/25/2011 10:12:01 | 27.927 | 3/21/2011 07:14:01 | 25.547 |
| 3/25/2011 10:42:01 | 28.676 | 3/21/2011 07:44:01 | 25.484 |
| 3/25/2011 11:12:01 | 29.488 | 3/21/2011 08:14:01 | 25.484 |
| 3/25/2011 11:42:01 | 30.112 | 3/21/2011 08:44:01 | 25.484 |
| 3/25/2011 12:12:01 | 31.111 | 3/21/2011 09:14:01 | 25.422 |
| 3/25/2011 12:42:01 | 31.361 | 3/21/2011 09:44:01 | 25.422 |
| 3/25/2011 13:12:01 | 29.925 | 3/21/2011 10:14:01 | 25.359 |
| 3/25/2011 13:42:01 | 31.361 | 3/21/2011 10:44:01 | 25.359 |
| 3/25/2011 14:12:01 | 29.238 | 3/21/2011 11:14:01 | 25.359 |
| 3/25/2011 14:42:01 | 30.674 | 3/21/2011 11:44:01 | 25.359 |
| 3/25/2011 15:12:01 | 30.175 | 3/21/2011 12:14:01 | 25.422 |
| 3/25/2011 15:42:01 | 29.301 | 3/21/2011 12:44:01 | 25.422 |
| 3/25/2011 16:12:01 | 28.614 | 3/21/2011 13:14:01 | 25.484 |
| 3/25/2011 16:42:01 | 27.802 | 3/21/2011 13:44:01 | 25.547 |
| 3/25/2011 17:12:01 | 27.614 | 3/21/2011 14:14:01 | 25.547 |
| 3/25/2011 17:42:01 | 27.302 | 3/21/2011 14:44:01 | 25.547 |
| 3/25/2011 18:12:01 | 26.740 | 3/21/2011 15:14:01 | 25.609 |

|                    |        |                    |        |
|--------------------|--------|--------------------|--------|
| 3/25/2011 18:42:01 | 25.927 | 3/21/2011 15:44:01 | 25.609 |
| 3/25/2011 19:12:01 | 25.303 | 3/21/2011 16:14:01 | 25.672 |
| 3/25/2011 19:42:01 | 24.927 | 3/21/2011 16:44:01 | 25.672 |
| 3/25/2011 20:12:01 | 24.615 | 3/21/2011 17:14:01 | 25.734 |
| 3/25/2011 20:42:01 | 24.615 | 3/21/2011 17:44:01 | 25.734 |
| 3/25/2011 21:12:01 | 24.677 | 3/21/2011 18:14:01 | 25.734 |
| 3/25/2011 21:42:01 | 24.490 | 3/21/2011 18:44:01 | 25.797 |
| 3/25/2011 22:12:01 | 24.302 | 3/21/2011 19:14:01 | 25.797 |
| 3/25/2011 22:42:01 | 24.177 | 3/21/2011 19:44:01 | 25.797 |
| 3/25/2011 23:12:01 | 23.990 | 3/21/2011 20:14:01 | 25.797 |
| 3/25/2011 23:42:01 | 23.927 | 3/21/2011 20:44:01 | 25.797 |
| 3/26/2011 00:12:01 | 23.802 | 3/21/2011 21:14:01 | 25.797 |
| 3/26/2011 00:42:01 | 23.490 | 3/21/2011 21:44:01 | 25.797 |
| 3/26/2011 01:12:01 | 23.615 | 3/21/2011 22:14:01 | 25.797 |
| 3/26/2011 01:42:01 | 24.177 | 3/21/2011 22:44:01 | 25.797 |
| 3/26/2011 02:12:01 | 24.427 | 3/21/2011 23:14:01 | 25.797 |
| 3/26/2011 02:42:01 | 24.615 | 3/21/2011 23:44:01 | 25.797 |
| 3/26/2011 03:12:01 | 24.802 | 3/22/2011 00:14:01 | 25.797 |
| 3/26/2011 03:42:01 | 24.865 | 3/22/2011 00:44:01 | 25.797 |
| 3/26/2011 04:12:01 | 24.802 | 3/22/2011 01:14:01 | 25.734 |
| 3/26/2011 04:42:01 | 24.615 | 3/22/2011 01:44:01 | 25.734 |
| 3/26/2011 05:12:01 | 24.365 | 3/22/2011 02:14:01 | 25.734 |
| 3/26/2011 05:42:01 | 23.990 | 3/22/2011 02:44:01 | 25.734 |
| 3/26/2011 06:12:01 | 23.677 | 3/22/2011 03:14:01 | 25.734 |
| 3/26/2011 06:42:01 | 23.615 | 3/22/2011 03:44:01 | 25.672 |
| 3/26/2011 07:12:01 | 23.802 | 3/22/2011 04:14:01 | 25.672 |
| 3/26/2011 07:42:01 | 25.052 | 3/22/2011 04:44:01 | 25.672 |
| 3/26/2011 08:12:01 | 26.240 | 3/22/2011 05:14:01 | 25.672 |
| 3/26/2011 08:42:01 | 26.990 | 3/22/2011 05:44:01 | 25.672 |
| 3/26/2011 09:12:01 | 27.365 | 3/22/2011 06:14:01 | 25.609 |
| 3/26/2011 09:42:01 | 28.364 | 3/22/2011 06:44:01 | 25.609 |
| 3/26/2011 10:12:01 | 29.113 | 3/22/2011 07:14:01 | 25.609 |
| 3/26/2011 10:42:01 | 29.551 | 3/22/2011 07:44:01 | 25.609 |
| 3/26/2011 11:12:01 | 30.425 | 3/22/2011 08:14:01 | 25.547 |
| 3/26/2011 11:42:01 | 30.612 | 3/22/2011 08:44:01 | 25.547 |
| 3/26/2011 12:12:01 | 30.799 | 3/22/2011 09:14:01 | 25.547 |
| 3/26/2011 12:42:01 | 31.673 | 3/22/2011 09:44:01 | 25.547 |
| 3/26/2011 13:12:01 | 32.110 | 3/22/2011 10:14:01 | 25.547 |
| 3/26/2011 13:42:01 | 32.110 | 3/22/2011 10:44:01 | 25.547 |
| 3/26/2011 14:12:01 | 30.862 | 3/22/2011 11:14:01 | 25.547 |
| 3/26/2011 14:42:01 | 31.486 | 3/22/2011 11:44:01 | 25.547 |
| 3/26/2011 15:12:01 | 30.237 | 3/22/2011 12:14:01 | 25.609 |
| 3/26/2011 15:42:01 | 29.176 | 3/22/2011 12:44:01 | 25.609 |
| 3/26/2011 16:12:01 | 28.426 | 3/22/2011 13:14:01 | 25.672 |
| 3/26/2011 16:42:01 | 27.552 | 3/22/2011 13:44:01 | 25.672 |
| 3/26/2011 17:12:01 | 27.052 | 3/22/2011 14:14:01 | 25.734 |
| 3/26/2011 17:42:01 | 26.427 | 3/22/2011 14:44:01 | 25.734 |
| 3/26/2011 18:12:01 | 25.552 | 3/22/2011 15:14:01 | 25.734 |
| 3/26/2011 18:42:01 | 24.802 | 3/22/2011 15:44:01 | 25.797 |
| 3/26/2011 19:12:01 | 24.115 | 3/22/2011 16:14:01 | 25.797 |

|                    |        |                    |        |
|--------------------|--------|--------------------|--------|
| 3/26/2011 19:42:01 | 23.677 | 3/22/2011 16:44:01 | 25.859 |
| 3/26/2011 20:12:01 | 23.302 | 3/22/2011 17:14:01 | 25.859 |
| 3/26/2011 20:42:01 | 23.114 | 3/22/2011 17:44:01 | 25.859 |
| 3/26/2011 21:12:01 | 22.864 | 3/22/2011 18:14:01 | 25.922 |
| 3/26/2011 21:42:01 | 22.677 | 3/22/2011 18:44:01 | 25.922 |
| 3/26/2011 22:12:01 | 22.427 | 3/22/2011 19:14:01 | 25.922 |
| 3/26/2011 22:42:01 | 22.302 | 3/22/2011 19:44:01 | 25.922 |
| 3/26/2011 23:12:01 | 22.176 | 3/22/2011 20:14:01 | 25.922 |
| 3/26/2011 23:42:01 | 22.114 | 3/22/2011 20:44:01 | 25.922 |
| 3/27/2011 00:12:01 | 22.114 | 3/22/2011 21:14:01 | 25.922 |
| 3/27/2011 00:42:01 | 22.427 | 3/22/2011 21:44:01 | 25.922 |
| 3/27/2011 01:12:01 | 22.677 | 3/22/2011 22:14:01 | 25.922 |
| 3/27/2011 01:42:01 | 22.802 | 3/22/2011 22:44:01 | 25.922 |
| 3/27/2011 02:12:01 | 22.927 | 3/22/2011 23:14:01 | 25.922 |
| 3/27/2011 02:42:01 | 22.864 | 3/22/2011 23:44:01 | 25.922 |
| 3/27/2011 03:12:01 | 22.739 | 3/23/2011 00:14:01 | 25.922 |
| 3/27/2011 03:42:01 | 22.552 | 3/23/2011 00:44:01 | 25.922 |
| 3/27/2011 04:12:01 | 22.802 | 3/23/2011 01:14:01 | 25.922 |
| 3/27/2011 04:42:01 | 22.802 | 3/23/2011 01:44:01 | 25.859 |
| 3/27/2011 05:12:01 | 22.927 | 3/23/2011 02:14:01 | 25.859 |
| 3/27/2011 05:42:01 | 22.739 | 3/23/2011 02:44:01 | 25.859 |
| 3/27/2011 06:12:01 | 22.427 | 3/23/2011 03:14:01 | 25.859 |
| 3/27/2011 06:42:01 | 22.739 | 3/23/2011 03:44:01 | 25.859 |
| 3/27/2011 07:12:01 | 23.427 | 3/23/2011 04:14:01 | 25.859 |
| 3/27/2011 07:42:01 | 23.990 | 3/23/2011 04:44:01 | 25.797 |
| 3/27/2011 08:12:01 | 24.927 | 3/23/2011 05:14:01 | 25.797 |
| 3/27/2011 08:42:01 | 26.115 | 3/23/2011 05:44:01 | 25.797 |
| 3/27/2011 09:12:01 | 27.177 | 3/23/2011 06:14:01 | 25.797 |
| 3/27/2011 09:42:01 | 28.177 | 3/23/2011 06:44:01 | 25.797 |
| 3/27/2011 10:12:01 | 29.051 | 3/23/2011 07:14:01 | 25.734 |
| 3/27/2011 10:42:01 | 30.050 | 3/23/2011 07:44:01 | 25.734 |
| 3/27/2011 11:12:01 | 30.674 | 3/23/2011 08:14:01 | 25.734 |
| 3/27/2011 11:42:01 | 31.423 | 3/23/2011 08:44:01 | 25.734 |
| 3/27/2011 12:12:01 | 32.048 | 3/23/2011 09:14:01 | 25.734 |
| 3/27/2011 12:42:01 | 32.360 | 3/23/2011 09:44:01 | 25.672 |
| 3/27/2011 13:12:01 | 32.609 | 3/23/2011 10:14:01 | 25.672 |
| 3/27/2011 13:42:01 | 32.672 | 3/23/2011 10:44:01 | 25.672 |
| 3/27/2011 14:12:01 | 32.921 | 3/23/2011 11:14:01 | 25.672 |
| 3/27/2011 14:42:01 | 32.172 | 3/23/2011 11:44:01 | 25.734 |
| 3/27/2011 15:12:01 | 31.299 | 3/23/2011 12:14:01 | 25.734 |
| 3/27/2011 15:42:01 | 29.800 | 3/23/2011 12:44:01 | 25.797 |
| 3/27/2011 16:12:01 | 29.051 | 3/23/2011 13:14:01 | 25.797 |
| 3/27/2011 16:42:01 | 27.927 | 3/23/2011 13:44:01 | 25.859 |
| 3/27/2011 17:12:01 | 26.802 | 3/23/2011 14:14:01 | 25.859 |
| 3/27/2011 17:42:01 | 25.865 | 3/23/2011 14:44:01 | 25.922 |
| 3/27/2011 18:12:01 | 24.990 | 3/23/2011 15:14:01 | 25.922 |
| 3/27/2011 18:42:01 | 24.177 | 3/23/2011 15:44:01 | 25.984 |
| 3/27/2011 19:12:01 | 23.427 | 3/23/2011 16:14:01 | 25.984 |
| 3/27/2011 19:42:01 | 22.864 | 3/23/2011 16:44:01 | 26.047 |
| 3/27/2011 20:12:01 | 22.552 | 3/23/2011 17:14:01 | 26.047 |

|                    |        |                    |        |
|--------------------|--------|--------------------|--------|
| 3/27/2011 20:42:01 | 22.302 | 3/23/2011 17:44:01 | 26.109 |
| 3/27/2011 21:12:01 | 22.302 | 3/23/2011 18:14:01 | 26.109 |
| 3/27/2011 21:42:01 | 22.552 | 3/23/2011 18:44:01 | 26.109 |
| 3/27/2011 22:12:01 | 22.989 | 3/23/2011 19:14:01 | 26.172 |
| 3/27/2011 22:42:01 | 22.989 | 3/23/2011 19:44:01 | 26.172 |
| 3/27/2011 23:12:01 | 22.989 | 3/23/2011 20:14:01 | 26.172 |
| 3/27/2011 23:42:01 | 22.802 | 3/23/2011 20:44:01 | 26.172 |
| 3/28/2011 00:12:01 | 22.739 | 3/23/2011 21:14:01 | 26.172 |
| 3/28/2011 00:42:01 | 22.864 | 3/23/2011 21:44:01 | 26.172 |
| 3/28/2011 01:12:01 | 22.802 | 3/23/2011 22:14:01 | 26.172 |
| 3/28/2011 01:42:01 | 22.489 | 3/23/2011 22:44:01 | 26.172 |
| 3/28/2011 02:12:01 | 22.239 | 3/23/2011 23:14:01 | 26.109 |
| 3/28/2011 02:42:01 | 22.051 | 3/23/2011 23:44:01 | 26.109 |
| 3/28/2011 03:12:01 | 21.864 | 3/24/2011 00:14:01 | 26.109 |
| 3/28/2011 03:42:01 | 21.739 | 3/24/2011 00:44:01 | 26.109 |
| 3/28/2011 04:12:01 | 21.676 | 3/24/2011 01:14:01 | 26.109 |
| 3/28/2011 04:42:01 | 21.614 | 3/24/2011 01:44:01 | 26.047 |
| 3/28/2011 05:12:01 | 21.864 | 3/24/2011 02:14:01 | 26.047 |
| 3/28/2011 05:42:01 | 21.801 | 3/24/2011 02:44:01 | 26.047 |
| 3/28/2011 06:12:01 | 21.614 | 3/24/2011 03:14:01 | 25.984 |
| 3/28/2011 06:42:01 | 21.801 | 3/24/2011 03:44:01 | 25.984 |
| 3/28/2011 07:12:01 | 22.802 | 3/24/2011 04:14:01 | 25.984 |
| 3/28/2011 07:42:01 | 24.177 | 3/24/2011 04:44:01 | 25.922 |
| 3/28/2011 08:12:01 | 25.240 | 3/24/2011 05:14:01 | 25.922 |
| 3/28/2011 08:42:01 | 26.240 | 3/24/2011 05:44:01 | 25.922 |
| 3/28/2011 09:12:01 | 27.052 | 3/24/2011 06:14:01 | 25.859 |
| 3/28/2011 09:42:01 | 28.239 | 3/24/2011 06:44:01 | 25.859 |
| 3/28/2011 10:12:01 | 29.301 | 3/24/2011 07:14:01 | 25.859 |
| 3/28/2011 10:42:01 | 30.112 | 3/24/2011 07:44:01 | 25.797 |
| 3/28/2011 11:12:01 | 30.986 | 3/24/2011 08:14:01 | 25.797 |
| 3/28/2011 11:42:01 | 31.798 | 3/24/2011 08:44:01 | 25.734 |
| 3/28/2011 12:12:01 | 32.297 | 3/24/2011 09:14:01 | 25.734 |
| 3/28/2011 12:42:01 | 32.672 | 3/24/2011 09:44:01 | 25.734 |
| 3/28/2011 13:12:01 | 33.046 | 3/24/2011 10:14:01 | 25.734 |
| 3/28/2011 13:42:01 | 33.358 | 3/24/2011 10:44:01 | 25.672 |
| 3/28/2011 14:12:01 | 33.545 | 3/24/2011 11:14:01 | 25.734 |
| 3/28/2011 14:42:01 | 32.672 | 3/24/2011 11:44:01 | 25.734 |
| 3/28/2011 15:12:01 | 31.299 | 3/24/2011 12:14:01 | 25.734 |
| 3/28/2011 15:42:01 | 29.988 | 3/24/2011 12:44:01 | 25.734 |
| 3/28/2011 16:12:01 | 29.363 | 3/24/2011 13:14:01 | 25.797 |
| 3/28/2011 16:42:01 | 28.489 | 3/24/2011 13:44:01 | 25.797 |
| 3/28/2011 17:12:01 | 27.677 | 3/24/2011 14:14:01 | 25.859 |
| 3/28/2011 17:42:01 | 27.115 | 3/24/2011 14:44:01 | 25.859 |
| 3/28/2011 18:12:01 | 26.490 | 3/24/2011 15:14:01 | 25.922 |
| 3/28/2011 18:42:01 | 26.052 | 3/24/2011 15:44:01 | 25.922 |
| 3/28/2011 19:12:01 | 25.927 | 3/24/2011 16:14:01 | 25.984 |
| 3/28/2011 19:42:01 | 26.052 | 3/24/2011 16:44:01 | 25.984 |
| 3/28/2011 20:12:01 | 26.052 | 3/24/2011 17:14:01 | 26.047 |
| 3/28/2011 20:42:01 | 24.677 | 3/24/2011 17:44:01 | 26.047 |
| 3/28/2011 21:12:01 | 23.240 | 3/24/2011 18:14:01 | 26.109 |

|                    |        |                    |        |
|--------------------|--------|--------------------|--------|
| 3/28/2011 21:42:01 | 22.989 | 3/24/2011 18:44:01 | 26.109 |
| 3/28/2011 22:12:01 | 22.802 | 3/24/2011 19:14:01 | 26.109 |
| 3/28/2011 22:42:01 | 22.802 | 3/24/2011 19:44:01 | 26.109 |
| 3/28/2011 23:12:01 | 22.927 | 3/24/2011 20:14:01 | 26.172 |
| 3/28/2011 23:42:01 | 23.177 | 3/24/2011 20:44:01 | 26.172 |
| 3/29/2011 00:12:01 | 23.365 | 3/24/2011 21:14:01 | 26.172 |
| 3/29/2011 00:42:01 | 23.365 | 3/24/2011 21:44:01 | 26.172 |
| 3/29/2011 01:12:01 | 23.177 | 3/24/2011 22:14:01 | 26.172 |
| 3/29/2011 01:42:01 | 23.177 | 3/24/2011 22:44:01 | 26.172 |
| 3/29/2011 02:12:01 | 23.052 | 3/24/2011 23:14:01 | 26.172 |
| 3/29/2011 02:42:01 | 22.989 | 3/24/2011 23:44:01 | 26.172 |
| 3/29/2011 03:12:01 | 22.864 | 3/25/2011 00:14:01 | 26.172 |
| 3/29/2011 03:42:01 | 22.552 | 3/25/2011 00:44:01 | 26.109 |
| 3/29/2011 04:12:01 | 22.364 | 3/25/2011 01:14:01 | 26.109 |
| 3/29/2011 04:42:01 | 22.489 | 3/25/2011 01:44:01 | 26.109 |
| 3/29/2011 05:12:01 | 22.677 | 3/25/2011 02:14:01 | 26.109 |
| 3/29/2011 05:42:01 | 22.614 | 3/25/2011 02:44:01 | 26.109 |
| 3/29/2011 06:12:01 | 22.489 | 3/25/2011 03:14:01 | 26.109 |
| 3/29/2011 06:42:01 | 23.177 | 3/25/2011 03:44:01 | 26.047 |
| 3/29/2011 07:12:01 | 23.802 | 3/25/2011 04:14:01 | 26.047 |
| 3/29/2011 07:42:01 | 24.740 | 3/25/2011 04:44:01 | 25.984 |
| 3/29/2011 08:12:01 | 25.927 | 3/25/2011 05:14:01 | 25.984 |
| 3/29/2011 08:42:01 | 26.365 | 3/25/2011 05:44:01 | 25.922 |
| 3/29/2011 09:12:01 | 26.490 | 3/25/2011 06:14:01 | 25.922 |
| 3/29/2011 09:42:01 | 27.614 | 3/25/2011 06:44:01 | 25.859 |
| 3/29/2011 10:12:01 | 28.676 | 3/25/2011 07:14:01 | 25.859 |
| 3/29/2011 10:42:01 | 29.613 | 3/25/2011 07:44:01 | 25.797 |
| 3/29/2011 11:12:01 | 30.300 | 3/25/2011 08:14:01 | 25.797 |
| 3/29/2011 11:42:01 | 31.361 | 3/25/2011 08:44:01 | 25.734 |
| 3/29/2011 12:12:01 | 31.860 | 3/25/2011 09:14:01 | 25.734 |
| 3/29/2011 12:42:01 | 32.172 | 3/25/2011 09:44:01 | 25.734 |
| 3/29/2011 13:12:01 | 32.609 | 3/25/2011 10:14:01 | 25.672 |
| 3/29/2011 13:42:01 | 32.360 | 3/25/2011 10:44:01 | 25.672 |
| 3/29/2011 14:12:01 | 32.859 | 3/25/2011 11:14:01 | 25.672 |
| 3/29/2011 14:42:01 | 32.547 | 3/25/2011 11:44:01 | 25.672 |
| 3/29/2011 15:12:01 | 31.611 | 3/25/2011 12:14:01 | 25.734 |
| 3/29/2011 15:42:01 | 30.549 | 3/25/2011 12:44:01 | 25.734 |
| 3/29/2011 16:12:01 | 28.864 | 3/25/2011 13:14:01 | 25.797 |
| 3/29/2011 16:42:01 | 28.302 | 3/25/2011 13:44:01 | 25.797 |
| 3/29/2011 17:12:01 | 27.739 | 3/25/2011 14:14:01 | 25.859 |
| 3/29/2011 17:42:01 | 26.865 | 3/25/2011 14:44:01 | 25.859 |
| 3/29/2011 18:12:01 | 26.052 | 3/25/2011 15:14:01 | 25.922 |
| 3/29/2011 18:42:01 | 25.428 | 3/25/2011 15:44:01 | 25.922 |
| 3/29/2011 19:12:01 | 25.052 | 3/25/2011 16:14:01 | 25.984 |
| 3/29/2011 19:42:01 | 25.303 | 3/25/2011 16:44:01 | 25.984 |
| 3/29/2011 20:12:01 | 25.303 | 3/25/2011 17:14:01 | 26.047 |
| 3/29/2011 20:42:01 | 24.990 | 3/25/2011 17:44:01 | 26.047 |
| 3/29/2011 21:12:01 | 25.428 | 3/25/2011 18:14:01 | 26.047 |
| 3/29/2011 21:42:01 | 24.240 | 3/25/2011 18:44:01 | 26.047 |
| 3/29/2011 22:12:01 | 22.927 | 3/25/2011 19:14:01 | 26.109 |

|                    |        |                    |        |
|--------------------|--------|--------------------|--------|
| 3/29/2011 22:42:01 | 22.739 | 3/25/2011 19:44:01 | 26.109 |
| 3/29/2011 23:12:01 | 22.552 | 3/25/2011 20:14:01 | 26.109 |
| 3/29/2011 23:42:01 | 22.614 | 3/25/2011 20:44:01 | 26.109 |
| 3/30/2011 00:12:01 | 22.677 | 3/25/2011 21:14:01 | 26.172 |
| 3/30/2011 00:42:01 | 22.677 | 3/25/2011 21:44:01 | 26.172 |
| 3/30/2011 01:12:01 | 22.677 | 3/25/2011 22:14:01 | 26.172 |
| 3/30/2011 01:42:01 | 22.614 | 3/25/2011 22:44:01 | 26.172 |
| 3/30/2011 02:12:01 | 22.614 | 3/25/2011 23:14:01 | 26.109 |
| 3/30/2011 02:42:01 | 22.677 | 3/25/2011 23:44:01 | 26.109 |
| 3/30/2011 03:12:01 | 22.739 | 3/26/2011 00:14:01 | 26.109 |
| 3/30/2011 03:42:01 | 22.864 | 3/26/2011 00:44:01 | 26.109 |
| 3/30/2011 04:12:01 | 22.864 | 3/26/2011 01:14:01 | 26.109 |
| 3/30/2011 04:42:01 | 22.802 | 3/26/2011 01:44:01 | 26.109 |
| 3/30/2011 05:12:01 | 22.739 | 3/26/2011 02:14:01 | 26.109 |
| 3/30/2011 05:42:01 | 22.739 | 3/26/2011 02:44:01 | 26.047 |
| 3/30/2011 06:12:01 | 22.927 | 3/26/2011 03:14:01 | 26.047 |
| 3/30/2011 06:42:01 | 23.302 | 3/26/2011 03:44:01 | 26.047 |
| 3/30/2011 07:12:01 | 23.677 | 3/26/2011 04:14:01 | 26.047 |
| 3/30/2011 07:42:01 | 24.240 | 3/26/2011 04:44:01 | 25.984 |
| 3/30/2011 08:12:01 | 24.177 | 3/26/2011 05:14:01 | 25.984 |
| 3/30/2011 08:42:01 | 24.927 | 3/26/2011 05:44:01 | 25.984 |
| 3/30/2011 09:12:01 | 25.303 | 3/26/2011 06:14:01 | 25.984 |
| 3/30/2011 09:42:01 | 26.240 | 3/26/2011 06:44:01 | 25.984 |
| 3/30/2011 10:12:01 | 26.677 | 3/26/2011 07:14:01 | 25.984 |
| 3/30/2011 10:42:01 | 27.115 | 3/26/2011 07:44:01 | 25.984 |
| 3/30/2011 11:12:01 | 27.427 | 3/26/2011 08:14:01 | 25.922 |
| 3/30/2011 11:42:01 | 27.927 | 3/26/2011 08:44:01 | 25.922 |
| 3/30/2011 12:12:01 | 29.176 | 3/26/2011 09:14:01 | 25.922 |
| 3/30/2011 12:42:01 | 28.739 | 3/26/2011 09:44:01 | 25.922 |
| 3/30/2011 13:12:01 | 29.051 | 3/26/2011 10:14:01 | 25.922 |
| 3/30/2011 13:42:01 | 29.301 | 3/26/2011 10:44:01 | 25.922 |
| 3/30/2011 14:12:01 | 29.426 | 3/26/2011 11:14:01 | 25.922 |
| 3/30/2011 14:42:01 | 28.926 | 3/26/2011 11:44:01 | 25.922 |
| 3/30/2011 15:12:01 | 28.114 | 3/26/2011 12:14:01 | 25.922 |
| 3/30/2011 15:42:01 | 27.989 | 3/26/2011 12:44:01 | 25.984 |
| 3/30/2011 16:12:01 | 27.989 | 3/26/2011 13:14:01 | 25.984 |
| 3/30/2011 16:42:01 | 27.302 | 3/26/2011 13:44:01 | 26.047 |
| 3/30/2011 17:12:01 | 26.990 | 3/26/2011 14:14:01 | 26.047 |
| 3/30/2011 17:42:01 | 26.490 | 3/26/2011 14:44:01 | 26.047 |
| 3/30/2011 18:12:01 | 26.052 | 3/26/2011 15:14:01 | 26.109 |
| 3/30/2011 18:42:01 | 25.615 | 3/26/2011 15:44:01 | 26.109 |
| 3/30/2011 19:12:01 | 25.490 | 3/26/2011 16:14:01 | 26.109 |
| 3/30/2011 19:42:01 | 25.240 | 3/26/2011 16:44:01 | 26.172 |
| 3/30/2011 20:12:01 | 24.865 | 3/26/2011 17:14:01 | 26.172 |
| 3/30/2011 20:42:01 | 24.427 | 3/26/2011 17:44:01 | 26.172 |
| 3/30/2011 21:12:01 | 24.052 | 3/26/2011 18:14:01 | 26.172 |
| 3/30/2011 21:42:01 | 23.740 | 3/26/2011 18:44:01 | 26.172 |
| 3/30/2011 22:12:01 | 23.677 | 3/26/2011 19:14:01 | 26.234 |
| 3/30/2011 22:42:01 | 23.677 | 3/26/2011 19:44:01 | 26.234 |
| 3/30/2011 23:12:01 | 23.740 | 3/26/2011 20:14:01 | 26.234 |



|                    |        |                    |        |
|--------------------|--------|--------------------|--------|
| 3/30/2011 23:42:01 | 23.927 | 3/26/2011 20:44:01 | 26.234 |
| 3/31/2011 00:12:01 | 23.865 | 3/26/2011 21:14:01 | 26.234 |
| 3/31/2011 00:42:01 | 23.677 | 3/26/2011 21:44:01 | 26.172 |
| 3/31/2011 01:12:01 | 23.427 | 3/26/2011 22:14:01 | 26.172 |
| 3/31/2011 01:42:01 | 23.302 | 3/26/2011 22:44:01 | 26.172 |
| 3/31/2011 02:12:01 | 23.302 | 3/26/2011 23:14:01 | 26.172 |
| 3/31/2011 02:42:01 | 23.427 | 3/26/2011 23:44:01 | 26.172 |
| 3/31/2011 03:12:01 | 23.490 | 3/27/2011 00:14:01 | 26.109 |
| 3/31/2011 03:42:01 | 23.490 | 3/27/2011 00:44:01 | 26.109 |
| 3/31/2011 04:12:01 | 23.365 | 3/27/2011 01:14:01 | 26.047 |
| 3/31/2011 04:42:01 | 23.114 | 3/27/2011 01:44:01 | 26.047 |
| 3/31/2011 05:12:01 | 22.864 | 3/27/2011 02:14:01 | 26.047 |
| 3/31/2011 05:42:01 | 22.614 | 3/27/2011 02:44:01 | 25.984 |
| 3/31/2011 06:12:01 | 22.427 | 3/27/2011 03:14:01 | 25.984 |
| 3/31/2011 06:42:01 | 22.927 | 3/27/2011 03:44:01 | 25.984 |
| 3/31/2011 07:12:01 | 23.802 | 3/27/2011 04:14:01 | 25.922 |
| 3/31/2011 07:42:01 | 24.552 | 3/27/2011 04:44:01 | 25.922 |
| 3/31/2011 08:12:01 | 25.677 | 3/27/2011 05:14:01 | 25.922 |
| 3/31/2011 08:42:01 | 26.052 | 3/27/2011 05:44:01 | 25.859 |
| 3/31/2011 09:12:01 | 26.552 | 3/27/2011 06:14:01 | 25.859 |
| 3/31/2011 09:42:01 | 26.865 | 3/27/2011 06:44:01 | 25.859 |
| 3/31/2011 10:12:01 | 27.989 | 3/27/2011 07:14:01 | 25.797 |
| 3/31/2011 10:42:01 | 28.614 | 3/27/2011 07:44:01 | 25.797 |
| 3/31/2011 11:12:01 | 29.613 | 3/27/2011 08:14:01 | 25.797 |
| 3/31/2011 11:42:01 | 28.926 | 3/27/2011 08:44:01 | 25.797 |
| 3/31/2011 12:12:01 | 28.801 | 3/27/2011 09:14:01 | 25.734 |
| 3/31/2011 12:42:01 | 29.488 | 3/27/2011 09:44:01 | 25.734 |
| 3/31/2011 13:12:01 | 29.051 | 3/27/2011 10:14:01 | 25.734 |
| 3/31/2011 13:42:01 | 29.238 | 3/27/2011 10:44:01 | 25.734 |
| 3/31/2011 14:12:01 | 30.175 | 3/27/2011 11:14:01 | 25.734 |
| 3/31/2011 14:42:01 | 31.049 | 3/27/2011 11:44:01 | 25.734 |
| 3/31/2011 15:12:01 | 29.800 | 3/27/2011 12:14:01 | 25.734 |
| 3/31/2011 15:42:01 | 27.489 | 3/27/2011 12:44:01 | 25.797 |
| 3/31/2011 16:12:01 | 24.990 | 3/27/2011 13:14:01 | 25.797 |
| 3/31/2011 16:42:01 | 24.740 | 3/27/2011 13:44:01 | 25.797 |
| 3/31/2011 17:12:01 | 24.865 | 3/27/2011 14:14:01 | 25.859 |
| 3/31/2011 17:42:01 | 24.865 | 3/27/2011 14:44:01 | 25.859 |
| 3/31/2011 18:12:01 | 24.677 | 3/27/2011 15:14:01 | 25.922 |
| 3/31/2011 18:42:01 | 24.365 | 3/27/2011 15:44:01 | 25.922 |
| 3/31/2011 19:12:01 | 24.177 | 3/27/2011 16:14:01 | 25.922 |
| 3/31/2011 19:42:01 | 23.990 | 3/27/2011 16:44:01 | 25.984 |
| 3/31/2011 20:12:01 | 23.927 | 3/27/2011 17:14:01 | 25.984 |
| 3/31/2011 20:42:01 | 24.115 | 3/27/2011 17:44:01 | 25.984 |
| 3/31/2011 21:12:01 | 24.552 | 3/27/2011 18:14:01 | 25.984 |
| 3/31/2011 21:42:01 | 24.490 | 3/27/2011 18:44:01 | 26.047 |
| 3/31/2011 22:12:01 | 24.490 | 3/27/2011 19:14:01 | 26.047 |
| 3/31/2011 22:42:01 | 24.302 | 3/27/2011 19:44:01 | 26.047 |
| 3/31/2011 23:12:01 | 24.427 | 3/27/2011 20:14:01 | 26.047 |
| 3/31/2011 23:42:01 | 24.427 | 3/27/2011 20:44:01 | 26.047 |
| 4/1/2011 00:12:01  | 24.552 | 3/27/2011 21:14:01 | 26.047 |

|                   |                           |        |
|-------------------|---------------------------|--------|
| 4/1/2011 00:42:01 | 24.677 3/27/2011 21:44:01 | 26.047 |
| 4/1/2011 01:12:01 | 24.677 3/27/2011 22:14:01 | 25.984 |
| 4/1/2011 01:42:01 | 24.552 3/27/2011 22:44:01 | 25.984 |
| 4/1/2011 02:12:01 | 24.490 3/27/2011 23:14:01 | 25.984 |
| 4/1/2011 02:42:01 | 24.365 3/27/2011 23:44:01 | 25.984 |
| 4/1/2011 03:12:01 | 24.115 3/28/2011 00:14:01 | 25.922 |
| 4/1/2011 03:42:01 | 24.115 3/28/2011 00:44:01 | 25.922 |
| 4/1/2011 04:12:01 | 24.052 3/28/2011 01:14:01 | 25.922 |
| 4/1/2011 04:42:01 | 24.052 3/28/2011 01:44:01 | 25.859 |
| 4/1/2011 05:12:01 | 23.740 3/28/2011 02:14:01 | 25.859 |
| 4/1/2011 05:42:01 | 23.427 3/28/2011 02:44:01 | 25.859 |
| 4/1/2011 06:12:01 | 23.177 3/28/2011 03:14:01 | 25.797 |
| 4/1/2011 06:42:01 | 23.552 3/28/2011 03:44:01 | 25.797 |
| 4/1/2011 07:12:01 | 24.365 3/28/2011 04:14:01 | 25.797 |
| 4/1/2011 07:42:01 | 24.802 3/28/2011 04:44:01 | 25.797 |
| 4/1/2011 08:12:01 | 25.240 3/28/2011 05:14:01 | 25.734 |
| 4/1/2011 08:42:01 | 25.740 3/28/2011 05:44:01 | 25.734 |
| 4/1/2011 09:12:01 | 26.240 3/28/2011 06:14:01 | 25.734 |
| 4/1/2011 09:42:01 | 26.615 3/28/2011 06:44:01 | 25.734 |
| 4/1/2011 10:12:01 | 26.990 3/28/2011 07:14:01 | 25.672 |
| 4/1/2011 10:42:01 | 27.427 3/28/2011 07:44:01 | 25.672 |
| 4/1/2011 11:12:01 | 27.677 3/28/2011 08:14:01 | 25.672 |
| 4/1/2011 11:42:01 | 28.239 3/28/2011 08:44:01 | 25.609 |
| 4/1/2011 12:12:01 | 27.927 3/28/2011 09:14:01 | 25.609 |
| 4/1/2011 12:42:01 | 27.614 3/28/2011 09:44:01 | 25.609 |
| 4/1/2011 13:12:01 | 27.989 3/28/2011 10:14:01 | 25.609 |
| 4/1/2011 13:42:01 | 28.801 3/28/2011 10:44:01 | 25.609 |
| 4/1/2011 14:12:01 | 29.238 3/28/2011 11:14:01 | 25.609 |
| 4/1/2011 14:42:01 | 29.301 3/28/2011 11:44:01 | 25.609 |
| 4/1/2011 15:12:01 | 28.052 3/28/2011 12:14:01 | 25.609 |
| 4/1/2011 15:42:01 | 27.302 3/28/2011 12:44:01 | 25.672 |
| 4/1/2011 16:12:01 | 27.177 3/28/2011 13:14:01 | 25.672 |
| 4/1/2011 16:42:01 | 26.990 3/28/2011 13:44:01 | 25.734 |
| 4/1/2011 17:12:01 | 26.927 3/28/2011 14:14:01 | 25.734 |
| 4/1/2011 17:42:01 | 26.677 3/28/2011 14:44:01 | 25.797 |
| 4/1/2011 18:12:01 | 25.990 3/28/2011 15:14:01 | 25.797 |
| 4/1/2011 18:42:01 | 24.865 3/28/2011 15:44:01 | 25.859 |
| 4/1/2011 19:12:01 | 24.240 3/28/2011 16:14:01 | 25.859 |
| 4/1/2011 19:42:01 | 23.802 3/28/2011 16:44:01 | 25.922 |
| 4/1/2011 20:12:01 | 23.427 3/28/2011 17:14:01 | 25.922 |
| 4/1/2011 20:42:01 | 23.302 3/28/2011 17:44:01 | 25.922 |
| 4/1/2011 21:12:01 | 23.177 3/28/2011 18:14:01 | 25.984 |
| 4/1/2011 21:42:01 | 22.989 3/28/2011 18:44:01 | 25.984 |
| 4/1/2011 22:12:01 | 22.802 3/28/2011 19:14:01 | 25.984 |
| 4/1/2011 22:42:01 | 22.614 3/28/2011 19:44:01 | 25.984 |
| 4/1/2011 23:12:01 | 22.364 3/28/2011 20:14:01 | 26.047 |
| 4/1/2011 23:42:01 | 22.239 3/28/2011 20:44:01 | 26.047 |
| 4/2/2011 00:12:01 | 22.239 3/28/2011 21:14:01 | 26.047 |
| 4/2/2011 00:42:01 | 22.427 3/28/2011 21:44:01 | 26.047 |
| 4/2/2011 01:12:01 | 22.302 3/28/2011 22:14:01 | 26.047 |

|                   |                           |        |
|-------------------|---------------------------|--------|
| 4/2/2011 01:42:01 | 22.302 3/28/2011 22:44:01 | 26.047 |
| 4/2/2011 02:12:01 | 22.552 3/28/2011 23:14:01 | 26.047 |
| 4/2/2011 02:42:01 | 22.677 3/28/2011 23:44:01 | 25.984 |
| 4/2/2011 03:12:01 | 22.739 3/29/2011 00:14:01 | 25.984 |
| 4/2/2011 03:42:01 | 22.677 3/29/2011 00:44:01 | 25.984 |
| 4/2/2011 04:12:01 | 22.552 3/29/2011 01:14:01 | 25.922 |
| 4/2/2011 04:42:01 | 22.302 3/29/2011 01:44:01 | 25.922 |
| 4/2/2011 05:12:01 | 22.302 3/29/2011 02:14:01 | 25.922 |
| 4/2/2011 05:42:01 | 22.176 3/29/2011 02:44:01 | 25.922 |
| 4/2/2011 06:12:01 | 22.051 3/29/2011 03:14:01 | 25.859 |
| 4/2/2011 06:42:01 | 22.427 3/29/2011 03:44:01 | 25.859 |
| 4/2/2011 07:12:01 | 23.240 3/29/2011 04:14:01 | 25.859 |
| 4/2/2011 07:42:01 | 24.302 3/29/2011 04:44:01 | 25.859 |
| 4/2/2011 08:12:01 | 25.365 3/29/2011 05:14:01 | 25.797 |
| 4/2/2011 08:42:01 | 26.302 3/29/2011 05:44:01 | 25.797 |
| 4/2/2011 09:12:01 | 27.177 3/29/2011 06:14:01 | 25.797 |
| 4/2/2011 09:42:01 | 27.927 3/29/2011 06:44:01 | 25.734 |
| 4/2/2011 10:12:01 | 28.739 3/29/2011 07:14:01 | 25.734 |
| 4/2/2011 10:42:01 | 29.301 3/29/2011 07:44:01 | 25.734 |
| 4/2/2011 11:12:01 | 29.863 3/29/2011 08:14:01 | 25.734 |
| 4/2/2011 11:42:01 | 30.674 3/29/2011 08:44:01 | 25.672 |
| 4/2/2011 12:12:01 | 31.174 3/29/2011 09:14:01 | 25.672 |
| 4/2/2011 12:42:01 | 31.423 3/29/2011 09:44:01 | 25.672 |
| 4/2/2011 13:12:01 | 31.860 3/29/2011 10:14:01 | 25.672 |
| 4/2/2011 13:42:01 | 31.798 3/29/2011 10:44:01 | 25.672 |
| 4/2/2011 14:12:01 | 31.673 3/29/2011 11:14:01 | 25.672 |
| 4/2/2011 14:42:01 | 31.423 3/29/2011 11:44:01 | 25.672 |
| 4/2/2011 15:12:01 | 30.237 3/29/2011 12:14:01 | 25.734 |
| 4/2/2011 15:42:01 | 28.926 3/29/2011 12:44:01 | 25.734 |
| 4/2/2011 16:12:01 | 28.426 3/29/2011 13:14:01 | 25.797 |
| 4/2/2011 16:42:01 | 27.489 3/29/2011 13:44:01 | 25.797 |
| 4/2/2011 17:12:01 | 27.240 3/29/2011 14:14:01 | 25.859 |
| 4/2/2011 17:42:01 | 26.802 3/29/2011 14:44:01 | 25.859 |
| 4/2/2011 18:12:01 | 26.177 3/29/2011 15:14:01 | 25.922 |
| 4/2/2011 18:42:01 | 26.115 3/29/2011 15:44:01 | 25.922 |
| 4/2/2011 19:12:01 | 25.865 3/29/2011 16:14:01 | 25.922 |
| 4/2/2011 19:42:01 | 25.428 3/29/2011 16:44:01 | 25.984 |
| 4/2/2011 20:12:01 | 25.428 3/29/2011 17:14:01 | 25.984 |
| 4/2/2011 20:42:01 | 25.552 3/29/2011 17:44:01 | 26.047 |
| 4/2/2011 21:12:01 | 24.052 3/29/2011 18:14:01 | 26.047 |
| 4/2/2011 21:42:01 | 23.615 3/29/2011 18:44:01 | 26.047 |
| 4/2/2011 22:12:01 | 23.552 3/29/2011 19:14:01 | 26.047 |
| 4/2/2011 22:42:01 | 23.615 3/29/2011 19:44:01 | 26.047 |
| 4/2/2011 23:12:01 | 23.552 3/29/2011 20:14:01 | 26.109 |
| 4/2/2011 23:42:01 | 23.677 3/29/2011 20:44:01 | 26.109 |
| 4/3/2011 00:12:01 | 23.552 3/29/2011 21:14:01 | 26.109 |
| 4/3/2011 00:42:01 | 23.240 3/29/2011 21:44:01 | 26.109 |
| 4/3/2011 01:12:01 | 22.927 3/29/2011 22:14:01 | 26.109 |
| 4/3/2011 01:42:01 | 22.677 3/29/2011 22:44:01 | 26.047 |
| 4/3/2011 02:12:01 | 22.427 3/29/2011 23:14:01 | 26.047 |

|                   |        |                    |        |
|-------------------|--------|--------------------|--------|
| 4/3/2011 02:42:01 | 22.302 | 3/29/2011 23:44:01 | 25.984 |
| 4/3/2011 03:12:01 | 22.114 | 3/30/2011 00:14:01 | 25.922 |
| 4/3/2011 03:42:01 | 21.864 | 3/30/2011 00:44:01 | 25.859 |
| 4/3/2011 04:12:01 | 21.739 | 3/30/2011 01:14:01 | 25.672 |
| 4/3/2011 04:42:01 | 21.488 | 3/30/2011 01:44:01 | 25.609 |
| 4/3/2011 05:12:01 | 21.238 | 3/30/2011 02:14:01 | 25.547 |
| 4/3/2011 05:42:01 | 20.925 | 3/30/2011 02:44:01 | 25.547 |
| 4/3/2011 06:12:01 | 20.988 | 3/30/2011 03:14:01 | 25.484 |
| 4/3/2011 06:42:01 | 21.301 | 3/30/2011 03:44:01 | 25.484 |
| 4/3/2011 07:12:01 | 21.989 | 3/30/2011 04:14:01 | 25.484 |
| 4/3/2011 07:42:01 | 23.052 | 3/30/2011 04:44:01 | 25.484 |
| 4/3/2011 08:12:01 | 23.865 | 3/30/2011 05:14:01 | 25.422 |
| 4/3/2011 08:42:01 | 24.427 | 3/30/2011 05:44:01 | 25.422 |
| 4/3/2011 09:12:01 | 25.178 | 3/30/2011 06:14:01 | 25.422 |
| 4/3/2011 09:42:01 | 26.052 | 3/30/2011 06:44:01 | 25.422 |
| 4/3/2011 10:12:01 | 26.865 | 3/30/2011 07:14:01 | 25.422 |
| 4/3/2011 10:42:01 | 27.614 | 3/30/2011 07:44:01 | 25.422 |
| 4/3/2011 11:12:01 | 28.426 | 3/30/2011 08:14:01 | 25.422 |
| 4/3/2011 11:42:01 | 29.176 | 3/30/2011 08:44:01 | 25.422 |
| 4/3/2011 12:12:01 | 29.675 | 3/30/2011 09:14:01 | 25.422 |
| 4/3/2011 12:42:01 | 30.362 | 3/30/2011 09:44:01 | 25.422 |
| 4/3/2011 13:12:01 | 30.612 | 3/30/2011 10:14:01 | 25.422 |
| 4/3/2011 13:42:01 | 30.737 | 3/30/2011 10:44:01 | 25.422 |
| 4/3/2011 14:12:01 | 31.111 | 3/30/2011 11:14:01 | 25.422 |
| 4/3/2011 14:42:01 | 30.674 | 3/30/2011 11:44:01 | 25.422 |
| 4/3/2011 15:12:01 | 28.926 | 3/30/2011 12:14:01 | 25.484 |
| 4/3/2011 15:42:01 | 28.614 | 3/30/2011 12:44:01 | 25.484 |
| 4/3/2011 16:12:01 | 27.864 | 3/30/2011 13:14:01 | 25.484 |
| 4/3/2011 16:42:01 | 27.240 | 3/30/2011 13:44:01 | 25.547 |
| 4/3/2011 17:12:01 | 26.740 | 3/30/2011 14:14:01 | 25.547 |
| 4/3/2011 17:42:01 | 26.490 | 3/30/2011 14:44:01 | 25.609 |
| 4/3/2011 18:12:01 | 26.302 | 3/30/2011 15:14:01 | 25.672 |
| 4/3/2011 18:42:01 | 26.115 | 3/30/2011 15:44:01 | 25.672 |
| 4/3/2011 19:12:01 | 25.615 | 3/30/2011 16:14:01 | 25.734 |
| 4/3/2011 19:42:01 | 25.365 | 3/30/2011 16:44:01 | 25.734 |
| 4/3/2011 20:12:01 | 25.240 | 3/30/2011 17:14:01 | 25.797 |
| 4/3/2011 20:42:01 | 24.740 | 3/30/2011 17:44:01 | 25.797 |
| 4/3/2011 21:12:01 | 24.677 | 3/30/2011 18:14:01 | 25.797 |
| 4/3/2011 21:42:01 | 23.990 | 3/30/2011 18:44:01 | 25.859 |
| 4/3/2011 22:12:01 | 24.052 | 3/30/2011 19:14:01 | 25.859 |
| 4/3/2011 22:42:01 | 24.177 | 3/30/2011 19:44:01 | 25.922 |
| 4/3/2011 23:12:01 | 24.240 | 3/30/2011 20:14:01 | 25.922 |
| 4/3/2011 23:42:01 | 24.052 | 3/30/2011 20:44:01 | 25.922 |
| 4/4/2011 00:12:01 | 23.740 | 3/30/2011 21:14:01 | 25.922 |
| 4/4/2011 00:42:01 | 23.677 | 3/30/2011 21:44:01 | 25.922 |
| 4/4/2011 01:12:01 | 23.552 | 3/30/2011 22:14:01 | 25.922 |
| 4/4/2011 01:42:01 | 23.365 | 3/30/2011 22:44:01 | 25.922 |
| 4/4/2011 02:12:01 | 23.302 | 3/30/2011 23:14:01 | 25.922 |
| 4/4/2011 02:42:01 | 22.989 | 3/30/2011 23:44:01 | 25.922 |
| 4/4/2011 03:12:01 | 22.927 | 3/31/2011 00:14:01 | 25.922 |

|                   |        |                    |        |
|-------------------|--------|--------------------|--------|
| 4/4/2011 03:42:01 | 22.864 | 3/31/2011 00:44:01 | 25.922 |
| 4/4/2011 04:12:01 | 22.677 | 3/31/2011 01:14:01 | 25.922 |
| 4/4/2011 04:42:01 | 21.926 | 3/31/2011 01:44:01 | 25.859 |
| 4/4/2011 05:12:01 | 20.425 | 3/31/2011 02:14:01 | 25.859 |
| 4/4/2011 05:42:01 | 19.862 | 3/31/2011 02:44:01 | 25.859 |
| 4/4/2011 06:12:01 | 19.737 | 3/31/2011 03:14:01 | 25.859 |
| 4/4/2011 06:42:01 | 20.112 | 3/31/2011 03:44:01 | 25.797 |
| 4/4/2011 07:12:01 | 20.863 | 3/31/2011 04:14:01 | 25.797 |
| 4/4/2011 07:42:01 | 21.739 | 3/31/2011 04:44:01 | 25.797 |
| 4/4/2011 08:12:01 | 23.114 | 3/31/2011 05:14:01 | 25.797 |
| 4/4/2011 08:42:01 | 24.427 | 3/31/2011 05:44:01 | 25.797 |
| 4/4/2011 09:12:01 | 25.365 | 3/31/2011 06:14:01 | 25.734 |
| 4/4/2011 09:42:01 | 26.240 | 3/31/2011 06:44:01 | 25.734 |
| 4/4/2011 10:12:01 | 27.302 | 3/31/2011 07:14:01 | 25.734 |
| 4/4/2011 10:42:01 | 28.239 | 3/31/2011 07:44:01 | 25.734 |
| 4/4/2011 11:12:01 | 28.989 | 3/31/2011 08:14:01 | 25.672 |
| 4/4/2011 11:42:01 | 29.675 | 3/31/2011 08:44:01 | 25.672 |
| 4/4/2011 12:12:01 | 29.738 | 3/31/2011 09:14:01 | 25.672 |
| 4/4/2011 12:42:01 | 30.799 | 3/31/2011 09:44:01 | 25.672 |
| 4/4/2011 13:12:01 | 30.862 | 3/31/2011 10:14:01 | 25.672 |
| 4/4/2011 13:42:01 | 31.049 | 3/31/2011 10:44:01 | 25.672 |
| 4/4/2011 14:12:01 | 31.361 | 3/31/2011 11:14:01 | 25.672 |
| 4/4/2011 14:42:01 | 29.925 | 3/31/2011 11:44:01 | 25.672 |
| 4/4/2011 15:12:01 | 28.489 | 3/31/2011 12:14:01 | 25.672 |
| 4/4/2011 15:42:01 | 27.802 | 3/31/2011 12:44:01 | 25.734 |
| 4/4/2011 16:12:01 | 26.927 | 3/31/2011 13:14:01 | 25.734 |
| 4/4/2011 16:42:01 | 26.115 | 3/31/2011 13:44:01 | 25.797 |
| 4/4/2011 17:12:01 | 25.552 | 3/31/2011 14:14:01 | 25.797 |
| 4/4/2011 17:42:01 | 24.990 | 3/31/2011 14:44:01 | 25.859 |
| 4/4/2011 18:12:01 | 24.740 | 3/31/2011 15:14:01 | 25.859 |
| 4/4/2011 18:42:01 | 24.115 | 3/31/2011 15:44:01 | 25.922 |
| 4/4/2011 19:12:01 | 23.490 | 3/31/2011 16:14:01 | 25.984 |
| 4/4/2011 19:42:01 | 22.989 | 3/31/2011 16:44:01 | 26.047 |
| 4/4/2011 20:12:01 | 22.614 | 3/31/2011 17:14:01 | 26.047 |
| 4/4/2011 20:42:01 | 22.302 | 3/31/2011 17:44:01 | 26.047 |
| 4/4/2011 21:12:01 | 22.176 | 3/31/2011 18:14:01 | 26.047 |
| 4/4/2011 21:42:01 | 21.989 | 3/31/2011 18:44:01 | 26.047 |
| 4/4/2011 22:12:01 | 22.302 | 3/31/2011 19:14:01 | 26.047 |
| 4/4/2011 22:42:01 | 22.614 | 3/31/2011 19:44:01 | 26.047 |
| 4/4/2011 23:12:01 | 22.927 | 3/31/2011 20:14:01 | 26.047 |
| 4/4/2011 23:42:01 | 23.177 | 3/31/2011 20:44:01 | 25.984 |
| 4/5/2011 00:12:01 | 23.177 | 3/31/2011 21:14:01 | 25.984 |
| 4/5/2011 00:42:01 | 23.240 | 3/31/2011 21:44:01 | 25.984 |
| 4/5/2011 01:12:01 | 23.240 | 3/31/2011 22:14:01 | 25.984 |
| 4/5/2011 01:42:01 | 23.240 | 3/31/2011 22:44:01 | 25.984 |
| 4/5/2011 02:12:01 | 23.114 | 3/31/2011 23:14:01 | 25.984 |
| 4/5/2011 02:42:01 | 22.677 | 3/31/2011 23:44:01 | 25.984 |
| 4/5/2011 03:12:01 | 22.176 | 4/1/2011 00:14:01  | 25.922 |
| 4/5/2011 03:42:01 | 21.989 | 4/1/2011 00:44:01  | 25.922 |
| 4/5/2011 04:12:01 | 21.739 | 4/1/2011 01:14:01  | 25.922 |

|                   |        |                   |        |
|-------------------|--------|-------------------|--------|
| 4/5/2011 04:42:01 | 21.739 | 4/1/2011 01:44:01 | 25.922 |
| 4/5/2011 05:12:01 | 21.551 | 4/1/2011 02:14:01 | 25.922 |
| 4/5/2011 05:42:01 | 21.426 | 4/1/2011 02:44:01 | 25.922 |
| 4/5/2011 06:12:01 | 21.426 | 4/1/2011 03:14:01 | 25.922 |
| 4/5/2011 06:42:01 | 21.614 | 4/1/2011 03:44:01 | 25.922 |
| 4/5/2011 07:12:01 | 22.552 | 4/1/2011 04:14:01 | 25.922 |
| 4/5/2011 07:42:01 | 23.677 | 4/1/2011 04:44:01 | 25.859 |
| 4/5/2011 08:12:01 | 24.490 | 4/1/2011 05:14:01 | 25.859 |
| 4/5/2011 08:42:01 | 25.490 | 4/1/2011 05:44:01 | 25.859 |
| 4/5/2011 09:12:01 | 26.302 | 4/1/2011 06:14:01 | 25.859 |
| 4/5/2011 09:42:01 | 27.365 | 4/1/2011 06:44:01 | 25.859 |
| 4/5/2011 10:12:01 | 28.302 | 4/1/2011 07:14:01 | 25.859 |
| 4/5/2011 10:42:01 | 29.113 | 4/1/2011 07:44:01 | 25.797 |
| 4/5/2011 11:12:01 | 30.050 | 4/1/2011 08:14:01 | 25.797 |
| 4/5/2011 11:42:01 | 30.612 | 4/1/2011 08:44:01 | 25.797 |
| 4/5/2011 12:12:01 | 31.236 | 4/1/2011 09:14:01 | 25.797 |
| 4/5/2011 12:42:01 | 31.361 | 4/1/2011 09:44:01 | 25.797 |
| 4/5/2011 13:12:01 | 31.673 | 4/1/2011 10:14:01 | 25.797 |
| 4/5/2011 13:42:01 | 31.548 | 4/1/2011 10:44:01 | 25.797 |
| 4/5/2011 14:12:01 | 32.048 | 4/1/2011 11:14:01 | 25.797 |
| 4/5/2011 14:42:01 | 31.735 | 4/1/2011 11:44:01 | 25.797 |
| 4/5/2011 15:12:01 | 30.674 | 4/1/2011 12:14:01 | 25.797 |
| 4/5/2011 15:42:01 | 29.488 | 4/1/2011 12:44:01 | 25.797 |
| 4/5/2011 16:12:01 | 28.739 | 4/1/2011 13:14:01 | 25.859 |
| 4/5/2011 16:42:01 | 28.364 | 4/1/2011 13:44:01 | 25.859 |
| 4/5/2011 17:12:01 | 27.739 | 4/1/2011 14:14:01 | 25.859 |
| 4/5/2011 17:42:01 | 27.365 | 4/1/2011 14:44:01 | 25.922 |
| 4/5/2011 18:12:01 | 26.615 | 4/1/2011 15:14:01 | 25.922 |
| 4/5/2011 18:42:01 | 26.052 | 4/1/2011 15:44:01 | 25.922 |
| 4/5/2011 19:12:01 | 25.615 | 4/1/2011 16:14:01 | 25.922 |
| 4/5/2011 19:42:01 | 25.240 | 4/1/2011 16:44:01 | 25.984 |
| 4/5/2011 20:12:01 | 24.865 | 4/1/2011 17:14:01 | 25.984 |
| 4/5/2011 20:42:01 | 24.865 | 4/1/2011 17:44:01 | 25.984 |
| 4/5/2011 21:12:01 | 24.427 | 4/1/2011 18:14:01 | 25.984 |
| 4/5/2011 21:42:01 | 24.302 | 4/1/2011 18:44:01 | 26.047 |
| 4/5/2011 22:12:01 | 24.177 | 4/1/2011 19:14:01 | 26.047 |
| 4/5/2011 22:42:01 | 24.302 | 4/1/2011 19:44:01 | 26.047 |
| 4/5/2011 23:12:01 | 24.177 | 4/1/2011 20:14:01 | 26.047 |
| 4/5/2011 23:42:01 | 24.115 | 4/1/2011 20:44:01 | 26.047 |
| 4/6/2011 00:12:01 | 23.990 | 4/1/2011 21:14:01 | 26.047 |
| 4/6/2011 00:42:01 | 23.865 | 4/1/2011 21:44:01 | 26.047 |
| 4/6/2011 01:12:01 | 23.427 | 4/1/2011 22:14:01 | 26.047 |
| 4/6/2011 01:42:01 | 23.177 | 4/1/2011 22:44:01 | 26.047 |
| 4/6/2011 02:12:01 | 22.927 | 4/1/2011 23:14:01 | 26.047 |
| 4/6/2011 02:42:01 | 22.739 | 4/1/2011 23:44:01 | 25.984 |
| 4/6/2011 03:12:01 | 22.614 | 4/2/2011 00:14:01 | 25.984 |
| 4/6/2011 03:42:01 | 22.552 | 4/2/2011 00:44:01 | 25.984 |
| 4/6/2011 04:12:01 | 22.364 | 4/2/2011 01:14:01 | 25.922 |
| 4/6/2011 04:42:01 | 21.989 | 4/2/2011 01:44:01 | 25.922 |
| 4/6/2011 05:12:01 | 21.614 | 4/2/2011 02:14:01 | 25.922 |

|                   |        |                   |        |
|-------------------|--------|-------------------|--------|
| 4/6/2011 05:42:01 | 21.301 | 4/2/2011 02:44:01 | 25.859 |
| 4/6/2011 06:12:01 | 20.988 | 4/2/2011 03:14:01 | 25.859 |
| 4/6/2011 06:42:01 | 21.488 | 4/2/2011 03:44:01 | 25.797 |
| 4/6/2011 07:12:01 | 22.489 | 4/2/2011 04:14:01 | 25.797 |
| 4/6/2011 07:42:01 | 23.552 | 4/2/2011 04:44:01 | 25.797 |
| 4/6/2011 08:12:01 | 24.927 | 4/2/2011 05:14:01 | 25.797 |
| 4/6/2011 08:42:01 | 26.490 | 4/2/2011 05:44:01 | 25.734 |
| 4/6/2011 09:12:01 | 27.489 | 4/2/2011 06:14:01 | 25.734 |
| 4/6/2011 09:42:01 | 28.052 | 4/2/2011 06:44:01 | 25.734 |
| 4/6/2011 10:12:01 | 29.051 | 4/2/2011 07:14:01 | 25.672 |
| 4/6/2011 10:42:01 | 29.488 | 4/2/2011 07:44:01 | 25.672 |
| 4/6/2011 11:12:01 | 30.300 | 4/2/2011 08:14:01 | 25.672 |
| 4/6/2011 11:42:01 | 30.862 | 4/2/2011 08:44:01 | 25.609 |
| 4/6/2011 12:12:01 | 31.299 | 4/2/2011 09:14:01 | 25.609 |
| 4/6/2011 12:42:01 | 31.548 | 4/2/2011 09:44:01 | 25.609 |
| 4/6/2011 13:12:01 | 32.048 | 4/2/2011 10:14:01 | 25.609 |
| 4/6/2011 13:42:01 | 32.048 | 4/2/2011 10:44:01 | 25.609 |
| 4/6/2011 14:12:01 | 31.611 | 4/2/2011 11:14:01 | 25.609 |
| 4/6/2011 14:42:01 | 31.423 | 4/2/2011 11:44:01 | 25.609 |
| 4/6/2011 15:12:01 | 30.799 | 4/2/2011 12:14:01 | 25.609 |
| 4/6/2011 15:42:01 | 29.613 | 4/2/2011 12:44:01 | 25.672 |
| 4/6/2011 16:12:01 | 28.801 | 4/2/2011 13:14:01 | 25.672 |
| 4/6/2011 16:42:01 | 28.364 | 4/2/2011 13:44:01 | 25.734 |
| 4/6/2011 17:12:01 | 27.802 | 4/2/2011 14:14:01 | 25.797 |
| 4/6/2011 17:42:01 | 27.489 | 4/2/2011 14:44:01 | 25.797 |
| 4/6/2011 18:12:01 | 26.615 | 4/2/2011 15:14:01 | 25.797 |
| 4/6/2011 18:42:01 | 25.927 | 4/2/2011 15:44:01 | 25.859 |
| 4/6/2011 19:12:01 | 25.490 | 4/2/2011 16:14:01 | 25.859 |
| 4/6/2011 19:42:01 | 25.178 | 4/2/2011 16:44:01 | 25.922 |
| 4/6/2011 20:12:01 | 25.115 | 4/2/2011 17:14:01 | 25.922 |
| 4/6/2011 20:42:01 | 24.990 | 4/2/2011 17:44:01 | 25.922 |
| 4/6/2011 21:12:01 | 25.178 | 4/2/2011 18:14:01 | 25.984 |
| 4/6/2011 21:42:01 | 24.615 | 4/2/2011 18:44:01 | 25.984 |
| 4/6/2011 22:12:01 | 24.427 | 4/2/2011 19:14:01 | 25.984 |
| 4/6/2011 22:42:01 | 23.990 | 4/2/2011 19:44:01 | 25.984 |
| 4/6/2011 23:12:01 | 23.427 | 4/2/2011 20:14:01 | 25.984 |
| 4/6/2011 23:42:01 | 23.052 | 4/2/2011 20:44:01 | 26.047 |
| 4/7/2011 00:12:01 | 22.677 | 4/2/2011 21:14:01 | 26.047 |
| 4/7/2011 00:42:01 | 22.489 | 4/2/2011 21:44:01 | 26.047 |
| 4/7/2011 01:12:01 | 22.176 | 4/2/2011 22:14:01 | 26.047 |
| 4/7/2011 01:42:01 | 22.114 | 4/2/2011 22:44:01 | 26.047 |
| 4/7/2011 02:12:01 | 22.051 | 4/2/2011 23:14:01 | 26.047 |
| 4/7/2011 02:42:01 | 21.864 | 4/2/2011 23:44:01 | 26.047 |
| 4/7/2011 03:12:01 | 21.551 | 4/3/2011 00:14:01 | 26.047 |
| 4/7/2011 03:42:01 | 21.238 | 4/3/2011 00:44:01 | 25.984 |
| 4/7/2011 04:12:01 | 20.988 | 4/3/2011 01:14:01 | 25.984 |
| 4/7/2011 04:42:01 | 21.176 | 4/3/2011 01:44:01 | 25.984 |
| 4/7/2011 05:12:01 | 20.863 | 4/3/2011 02:14:01 | 25.984 |
| 4/7/2011 05:42:01 | 20.863 | 4/3/2011 02:44:01 | 25.922 |
| 4/7/2011 06:12:01 | 20.863 | 4/3/2011 03:14:01 | 25.922 |

|                   |        |                   |        |
|-------------------|--------|-------------------|--------|
| 4/7/2011 06:42:01 | 21.301 | 4/3/2011 03:44:01 | 25.922 |
| 4/7/2011 07:12:01 | 22.302 | 4/3/2011 04:14:01 | 25.922 |
| 4/7/2011 07:42:01 | 23.240 | 4/3/2011 04:44:01 | 25.859 |
| 4/7/2011 08:12:01 | 24.802 | 4/3/2011 05:14:01 | 25.859 |
| 4/7/2011 08:42:01 | 25.927 | 4/3/2011 05:44:01 | 25.797 |
| 4/7/2011 09:12:01 | 26.927 | 4/3/2011 06:14:01 | 25.797 |
| 4/7/2011 09:42:01 | 27.739 | 4/3/2011 06:44:01 | 25.797 |
| 4/7/2011 10:12:01 | 28.614 | 4/3/2011 07:14:01 | 25.734 |
| 4/7/2011 10:42:01 | 28.989 | 4/3/2011 07:44:01 | 25.734 |
| 4/7/2011 11:12:01 | 29.863 | 4/3/2011 08:14:01 | 25.672 |
| 4/7/2011 11:42:01 | 30.799 | 4/3/2011 08:44:01 | 25.672 |
| 4/7/2011 12:12:01 | 30.986 | 4/3/2011 09:14:01 | 25.609 |
| 4/7/2011 12:42:01 | 31.486 | 4/3/2011 09:44:01 | 25.609 |
| 4/7/2011 13:12:01 | 31.798 | 4/3/2011 10:14:01 | 25.609 |
| 4/7/2011 13:42:01 | 31.985 | 4/3/2011 10:44:01 | 25.547 |
| 4/7/2011 14:12:01 | 32.048 | 4/3/2011 11:14:01 | 25.547 |
| 4/7/2011 14:42:01 | 32.110 | 4/3/2011 11:44:01 | 25.609 |
| 4/7/2011 15:12:01 | 31.174 | 4/3/2011 12:14:01 | 25.609 |
| 4/7/2011 15:42:01 | 29.738 | 4/3/2011 12:44:01 | 25.609 |
| 4/7/2011 16:12:01 | 29.113 | 4/3/2011 13:14:01 | 25.609 |
| 4/7/2011 16:42:01 | 28.177 | 4/3/2011 13:44:01 | 25.672 |
| 4/7/2011 17:12:01 | 27.489 | 4/3/2011 14:14:01 | 25.672 |
| 4/7/2011 17:42:01 | 26.802 | 4/3/2011 14:44:01 | 25.734 |
| 4/7/2011 18:12:01 | 26.490 | 4/3/2011 15:14:01 | 25.734 |
| 4/7/2011 18:42:01 | 26.302 | 4/3/2011 15:44:01 | 25.734 |
| 4/7/2011 19:12:01 | 26.302 | 4/3/2011 16:14:01 | 25.797 |
| 4/7/2011 19:42:01 | 25.927 | 4/3/2011 16:44:01 | 25.797 |
| 4/7/2011 20:12:01 | 25.490 | 4/3/2011 17:14:01 | 25.797 |
| 4/7/2011 20:42:01 | 25.365 | 4/3/2011 17:44:01 | 25.859 |
| 4/7/2011 21:12:01 | 25.365 | 4/3/2011 18:14:01 | 25.859 |
| 4/7/2011 21:42:01 | 24.927 | 4/3/2011 18:44:01 | 25.922 |
| 4/7/2011 22:12:01 | 24.552 | 4/3/2011 19:14:01 | 25.922 |
| 4/7/2011 22:42:01 | 24.177 | 4/3/2011 19:44:01 | 25.922 |
| 4/7/2011 23:12:01 | 23.677 | 4/3/2011 20:14:01 | 25.922 |
| 4/7/2011 23:42:01 | 23.490 | 4/3/2011 20:44:01 | 25.922 |
| 4/8/2011 00:12:01 | 23.302 | 4/3/2011 21:14:01 | 25.984 |
| 4/8/2011 00:42:01 | 23.427 | 4/3/2011 21:44:01 | 25.984 |
| 4/8/2011 01:12:01 | 23.240 | 4/3/2011 22:14:01 | 25.984 |
| 4/8/2011 01:42:01 | 23.490 | 4/3/2011 22:44:01 | 25.984 |
| 4/8/2011 02:12:01 | 23.240 | 4/3/2011 23:14:01 | 25.984 |
| 4/8/2011 02:42:01 | 23.240 | 4/3/2011 23:44:01 | 25.984 |
| 4/8/2011 03:12:01 | 23.240 | 4/4/2011 00:14:01 | 25.984 |
| 4/8/2011 03:42:01 | 23.302 | 4/4/2011 00:44:01 | 25.984 |
| 4/8/2011 04:12:01 | 22.802 | 4/4/2011 01:14:01 | 25.922 |
| 4/8/2011 04:42:01 | 22.239 | 4/4/2011 01:44:01 | 25.922 |
| 4/8/2011 05:12:01 | 21.926 | 4/4/2011 02:14:01 | 25.922 |
| 4/8/2011 05:42:01 | 21.614 | 4/4/2011 02:44:01 | 25.922 |
| 4/8/2011 06:12:01 | 21.426 | 4/4/2011 03:14:01 | 25.922 |
| 4/8/2011 06:42:01 | 21.676 | 4/4/2011 03:44:01 | 25.859 |
| 4/8/2011 07:12:01 | 22.614 | 4/4/2011 04:14:01 | 25.859 |



|                   |        |                   |        |
|-------------------|--------|-------------------|--------|
| 4/8/2011 07:42:01 | 23.990 | 4/4/2011 04:44:01 | 25.859 |
| 4/8/2011 08:12:01 | 25.615 | 4/4/2011 05:14:01 | 25.859 |
| 4/8/2011 08:42:01 | 27.052 | 4/4/2011 05:44:01 | 25.797 |
| 4/8/2011 09:12:01 | 27.989 | 4/4/2011 06:14:01 | 25.797 |
| 4/8/2011 09:42:01 | 28.551 | 4/4/2011 06:44:01 | 25.797 |
| 4/8/2011 10:12:01 | 29.488 | 4/4/2011 07:14:01 | 25.734 |
| 4/8/2011 10:42:01 | 30.175 | 4/4/2011 07:44:01 | 25.734 |
| 4/8/2011 11:12:01 | 31.049 | 4/4/2011 08:14:01 | 25.672 |
| 4/8/2011 11:42:01 | 31.735 | 4/4/2011 08:44:01 | 25.672 |
| 4/8/2011 12:12:01 | 32.235 | 4/4/2011 09:14:01 | 25.609 |
| 4/8/2011 12:42:01 | 32.484 | 4/4/2011 09:44:01 | 25.547 |
| 4/8/2011 13:12:01 | 32.984 | 4/4/2011 10:14:01 | 25.547 |
| 4/8/2011 13:42:01 | 32.360 | 4/4/2011 10:44:01 | 25.547 |
| 4/8/2011 14:12:01 | 32.297 | 4/4/2011 11:14:01 | 25.484 |
| 4/8/2011 14:42:01 | 30.924 | 4/4/2011 11:44:01 | 25.484 |
| 4/8/2011 15:12:01 | 30.862 | 4/4/2011 12:14:01 | 25.547 |
| 4/8/2011 15:42:01 | 29.800 | 4/4/2011 12:44:01 | 25.547 |
| 4/8/2011 16:12:01 | 29.051 | 4/4/2011 13:14:01 | 25.547 |
| 4/8/2011 16:42:01 | 28.239 | 4/4/2011 13:44:01 | 25.547 |
| 4/8/2011 17:12:01 | 27.552 | 4/4/2011 14:14:01 | 25.609 |
| 4/8/2011 17:42:01 | 27.240 | 4/4/2011 14:44:01 | 25.609 |
| 4/8/2011 18:12:01 | 26.552 | 4/4/2011 15:14:01 | 25.609 |
| 4/8/2011 18:42:01 | 26.365 | 4/4/2011 15:44:01 | 25.609 |
| 4/8/2011 19:12:01 | 26.427 | 4/4/2011 16:14:01 | 25.672 |
| 4/8/2011 19:42:01 | 25.990 | 4/4/2011 16:44:01 | 25.672 |
| 4/8/2011 20:12:01 | 25.303 | 4/4/2011 17:14:01 | 25.672 |
| 4/8/2011 20:42:01 | 24.740 | 4/4/2011 17:44:01 | 25.734 |
| 4/8/2011 21:12:01 | 24.677 | 4/4/2011 18:14:01 | 25.734 |
| 4/8/2011 21:42:01 | 24.615 | 4/4/2011 18:44:01 | 25.734 |
| 4/8/2011 22:12:01 | 24.302 | 4/4/2011 19:14:01 | 25.734 |
| 4/8/2011 22:42:01 | 24.365 | 4/4/2011 19:44:01 | 25.734 |
| 4/8/2011 23:12:01 | 24.677 | 4/4/2011 20:14:01 | 25.734 |
| 4/8/2011 23:42:01 | 24.365 | 4/4/2011 20:44:01 | 25.734 |
| 4/9/2011 00:12:01 | 24.052 | 4/4/2011 21:14:01 | 25.734 |
| 4/9/2011 00:42:01 | 23.927 | 4/4/2011 21:44:01 | 25.734 |
| 4/9/2011 01:12:01 | 23.927 | 4/4/2011 22:14:01 | 25.734 |
| 4/9/2011 01:42:01 | 23.865 | 4/4/2011 22:44:01 | 25.734 |
| 4/9/2011 02:12:01 | 23.927 | 4/4/2011 23:14:01 | 25.734 |
| 4/9/2011 02:42:01 | 23.552 | 4/4/2011 23:44:01 | 25.672 |
| 4/9/2011 03:12:01 | 23.240 | 4/5/2011 00:14:01 | 25.672 |
| 4/9/2011 03:42:01 | 23.114 | 4/5/2011 00:44:01 | 25.672 |
| 4/9/2011 04:12:01 | 23.114 | 4/5/2011 01:14:01 | 25.672 |
| 4/9/2011 04:42:01 | 22.989 | 4/5/2011 01:44:01 | 25.609 |
| 4/9/2011 05:12:01 | 22.989 | 4/5/2011 02:14:01 | 25.609 |
| 4/9/2011 05:42:01 | 22.989 | 4/5/2011 02:44:01 | 25.609 |
| 4/9/2011 06:12:01 | 22.802 | 4/5/2011 03:14:01 | 25.609 |
| 4/9/2011 06:42:01 | 22.989 | 4/5/2011 03:44:01 | 25.547 |
| 4/9/2011 07:12:01 | 24.052 | 4/5/2011 04:14:01 | 25.547 |
| 4/9/2011 07:42:01 | 24.740 | 4/5/2011 04:44:01 | 25.547 |
| 4/9/2011 08:12:01 | 25.740 | 4/5/2011 05:14:01 | 25.547 |

|                    |        |                   |        |
|--------------------|--------|-------------------|--------|
| 4/9/2011 08:42:01  | 26.615 | 4/5/2011 05:44:01 | 25.547 |
| 4/9/2011 09:12:01  | 27.677 | 4/5/2011 06:14:01 | 25.484 |
| 4/9/2011 09:42:01  | 28.489 | 4/5/2011 06:44:01 | 25.484 |
| 4/9/2011 10:12:01  | 29.363 | 4/5/2011 07:14:01 | 25.484 |
| 4/9/2011 10:42:01  | 29.925 | 4/5/2011 07:44:01 | 25.422 |
| 4/9/2011 11:12:01  | 30.799 | 4/5/2011 08:14:01 | 25.422 |
| 4/9/2011 11:42:01  | 31.611 | 4/5/2011 08:44:01 | 25.422 |
| 4/9/2011 12:12:01  | 30.737 | 4/5/2011 09:14:01 | 25.422 |
| 4/9/2011 12:42:01  | 31.923 | 4/5/2011 09:44:01 | 25.359 |
| 4/9/2011 13:12:01  | 32.672 | 4/5/2011 10:14:01 | 25.359 |
| 4/9/2011 13:42:01  | 33.483 | 4/5/2011 10:44:01 | 25.359 |
| 4/9/2011 14:12:01  | 33.296 | 4/5/2011 11:14:01 | 25.359 |
| 4/9/2011 14:42:01  | 32.672 | 4/5/2011 11:44:01 | 25.422 |
| 4/9/2011 15:12:01  | 31.486 | 4/5/2011 12:14:01 | 25.422 |
| 4/9/2011 15:42:01  | 29.863 | 4/5/2011 12:44:01 | 25.422 |
| 4/9/2011 16:12:01  | 28.801 | 4/5/2011 13:14:01 | 25.484 |
| 4/9/2011 16:42:01  | 28.114 | 4/5/2011 13:44:01 | 25.484 |
| 4/9/2011 17:12:01  | 27.365 | 4/5/2011 14:14:01 | 25.547 |
| 4/9/2011 17:42:01  | 26.740 | 4/5/2011 14:44:01 | 25.609 |
| 4/9/2011 18:12:01  | 26.865 | 4/5/2011 15:14:01 | 25.609 |
| 4/9/2011 18:42:01  | 26.990 | 4/5/2011 15:44:01 | 25.609 |
| 4/9/2011 19:12:01  | 26.802 | 4/5/2011 16:14:01 | 25.672 |
| 4/9/2011 19:42:01  | 26.552 | 4/5/2011 16:44:01 | 25.672 |
| 4/9/2011 20:12:01  | 25.802 | 4/5/2011 17:14:01 | 25.734 |
| 4/9/2011 20:42:01  | 25.052 | 4/5/2011 17:44:01 | 25.734 |
| 4/9/2011 21:12:01  | 24.677 | 4/5/2011 18:14:01 | 25.734 |
| 4/9/2011 21:42:01  | 24.427 | 4/5/2011 18:44:01 | 25.797 |
| 4/9/2011 22:12:01  | 24.302 | 4/5/2011 19:14:01 | 25.797 |
| 4/9/2011 22:42:01  | 24.115 | 4/5/2011 19:44:01 | 25.859 |
| 4/9/2011 23:12:01  | 23.990 | 4/5/2011 20:14:01 | 25.859 |
| 4/9/2011 23:42:01  | 23.802 | 4/5/2011 20:44:01 | 25.859 |
| 4/10/2011 00:12:01 | 23.865 | 4/5/2011 21:14:01 | 25.859 |
| 4/10/2011 00:42:01 | 23.802 | 4/5/2011 21:44:01 | 25.922 |
| 4/10/2011 01:12:01 | 23.677 | 4/5/2011 22:14:01 | 25.922 |
| 4/10/2011 01:42:01 | 23.927 | 4/5/2011 22:44:01 | 25.922 |
| 4/10/2011 02:12:01 | 23.802 | 4/5/2011 23:14:01 | 25.922 |
| 4/10/2011 02:42:01 | 23.552 | 4/5/2011 23:44:01 | 25.922 |
| 4/10/2011 03:12:01 | 23.302 | 4/6/2011 00:14:01 | 25.859 |
| 4/10/2011 03:42:01 | 23.177 | 4/6/2011 00:44:01 | 25.859 |
| 4/10/2011 04:12:01 | 22.989 | 4/6/2011 01:14:01 | 25.859 |
| 4/10/2011 04:42:01 | 22.864 | 4/6/2011 01:44:01 | 25.859 |
| 4/10/2011 05:12:01 | 22.677 | 4/6/2011 02:14:01 | 25.859 |
| 4/10/2011 05:42:01 | 22.614 | 4/6/2011 02:44:01 | 25.859 |
| 4/10/2011 06:12:01 | 22.739 | 4/6/2011 03:14:01 | 25.797 |
| 4/10/2011 06:42:01 | 22.927 | 4/6/2011 03:44:01 | 25.797 |
| 4/10/2011 07:12:01 | 23.802 | 4/6/2011 04:14:01 | 25.797 |
| 4/10/2011 07:42:01 | 24.990 | 4/6/2011 04:44:01 | 25.797 |
| 4/10/2011 08:12:01 | 26.240 | 4/6/2011 05:14:01 | 25.797 |
| 4/10/2011 08:42:01 | 27.365 | 4/6/2011 05:44:01 | 25.734 |
| 4/10/2011 09:12:01 | 27.365 | 4/6/2011 06:14:01 | 25.734 |

|                    |        |                   |        |
|--------------------|--------|-------------------|--------|
| 4/10/2011 09:42:01 | 27.614 | 4/6/2011 06:44:01 | 25.734 |
| 4/10/2011 10:12:01 | 27.739 | 4/6/2011 07:14:01 | 25.672 |
| 4/10/2011 10:42:01 | 28.801 | 4/6/2011 07:44:01 | 25.672 |
| 4/10/2011 11:12:01 | 28.926 | 4/6/2011 08:14:01 | 25.609 |
| 4/10/2011 11:42:01 | 30.362 | 4/6/2011 08:44:01 | 25.609 |
| 4/10/2011 12:12:01 | 31.798 | 4/6/2011 09:14:01 | 25.609 |
| 4/10/2011 12:42:01 | 30.674 | 4/6/2011 09:44:01 | 25.547 |
| 4/10/2011 13:12:01 | 29.738 | 4/6/2011 10:14:01 | 25.547 |
| 4/10/2011 13:42:01 | 28.926 | 4/6/2011 10:44:01 | 25.547 |
| 4/10/2011 14:12:01 | 28.739 | 4/6/2011 11:14:01 | 25.547 |
| 4/10/2011 14:42:01 | 27.427 | 4/6/2011 11:44:01 | 25.547 |
| 4/10/2011 15:12:01 | 26.615 | 4/6/2011 12:14:01 | 25.547 |
| 4/10/2011 15:42:01 | 26.615 | 4/6/2011 12:44:01 | 25.609 |
| 4/10/2011 16:12:01 | 26.365 | 4/6/2011 13:14:01 | 25.609 |
| 4/10/2011 16:42:01 | 26.615 | 4/6/2011 13:44:01 | 25.609 |
| 4/10/2011 17:12:01 | 26.490 | 4/6/2011 14:14:01 | 25.672 |
| 4/10/2011 17:42:01 | 25.802 | 4/6/2011 14:44:01 | 25.672 |
| 4/10/2011 18:12:01 | 25.115 | 4/6/2011 15:14:01 | 25.734 |
| 4/10/2011 18:42:01 | 24.802 | 4/6/2011 15:44:01 | 25.734 |
| 4/10/2011 19:12:01 | 24.302 | 4/6/2011 16:14:01 | 25.797 |
| 4/10/2011 19:42:01 | 23.927 | 4/6/2011 16:44:01 | 25.797 |
| 4/10/2011 20:12:01 | 23.615 | 4/6/2011 17:14:01 | 25.797 |
| 4/10/2011 20:42:01 | 23.490 | 4/6/2011 17:44:01 | 25.859 |
| 4/10/2011 21:12:01 | 23.302 | 4/6/2011 18:14:01 | 25.859 |
| 4/10/2011 21:42:01 | 23.177 | 4/6/2011 18:44:01 | 25.859 |
| 4/10/2011 22:12:01 | 23.302 | 4/6/2011 19:14:01 | 25.922 |
| 4/10/2011 22:42:01 | 23.052 | 4/6/2011 19:44:01 | 25.922 |
| 4/10/2011 23:12:01 | 22.802 | 4/6/2011 20:14:01 | 25.922 |
| 4/10/2011 23:42:01 | 22.677 | 4/6/2011 20:44:01 | 25.984 |
| 4/11/2011 00:12:01 | 22.677 | 4/6/2011 21:14:01 | 25.984 |
| 4/11/2011 00:42:01 | 22.489 | 4/6/2011 21:44:01 | 25.984 |
| 4/11/2011 01:12:01 | 22.364 | 4/6/2011 22:14:01 | 25.984 |
| 4/11/2011 01:42:01 | 22.364 | 4/6/2011 22:44:01 | 25.984 |
| 4/11/2011 02:12:01 | 22.302 | 4/6/2011 23:14:01 | 25.984 |
| 4/11/2011 02:42:01 | 22.302 | 4/6/2011 23:44:01 | 25.984 |
| 4/11/2011 03:12:01 | 22.302 | 4/7/2011 00:14:01 | 25.984 |
| 4/11/2011 03:42:01 | 22.427 | 4/7/2011 00:44:01 | 25.922 |
| 4/11/2011 04:12:01 | 22.427 | 4/7/2011 01:14:01 | 25.922 |
| 4/11/2011 04:42:01 | 22.489 | 4/7/2011 01:44:01 | 25.922 |
| 4/11/2011 05:12:01 | 22.614 | 4/7/2011 02:14:01 | 25.922 |
| 4/11/2011 05:42:01 | 22.739 | 4/7/2011 02:44:01 | 25.922 |
| 4/11/2011 06:12:01 | 22.927 | 4/7/2011 03:14:01 | 25.859 |
| 4/11/2011 06:42:01 | 23.302 | 4/7/2011 03:44:01 | 25.859 |
| 4/11/2011 07:12:01 | 23.865 | 4/7/2011 04:14:01 | 25.859 |
| 4/11/2011 07:42:01 | 24.802 | 4/7/2011 04:44:01 | 25.797 |
| 4/11/2011 08:12:01 | 24.990 | 4/7/2011 05:14:01 | 25.797 |
| 4/11/2011 08:42:01 | 25.740 | 4/7/2011 05:44:01 | 25.734 |
| 4/11/2011 09:12:01 | 25.865 | 4/7/2011 06:14:01 | 25.734 |
| 4/11/2011 09:42:01 | 25.677 | 4/7/2011 06:44:01 | 25.672 |
| 4/11/2011 10:12:01 | 25.490 | 4/7/2011 07:14:01 | 25.672 |

|                    |        |                   |        |
|--------------------|--------|-------------------|--------|
| 4/11/2011 10:42:01 | 25.490 | 4/7/2011 07:44:01 | 25.609 |
| 4/11/2011 11:12:01 | 26.365 | 4/7/2011 08:14:01 | 25.609 |
| 4/11/2011 11:42:01 | 26.052 | 4/7/2011 08:44:01 | 25.609 |
| 4/11/2011 12:12:01 | 26.677 | 4/7/2011 09:14:01 | 25.547 |
| 4/11/2011 12:42:01 | 27.864 | 4/7/2011 09:44:01 | 25.547 |
| 4/11/2011 13:12:01 | 28.239 | 4/7/2011 10:14:01 | 25.484 |
| 4/11/2011 13:42:01 | 28.114 | 4/7/2011 10:44:01 | 25.484 |
| 4/11/2011 14:12:01 | 27.989 | 4/7/2011 11:14:01 | 25.484 |
| 4/11/2011 14:42:01 | 27.177 | 4/7/2011 11:44:01 | 25.547 |
| 4/11/2011 15:12:01 | 27.365 | 4/7/2011 12:14:01 | 25.547 |
| 4/11/2011 15:42:01 | 26.990 | 4/7/2011 12:44:01 | 25.547 |
| 4/11/2011 16:12:01 | 25.865 | 4/7/2011 13:14:01 | 25.547 |
| 4/11/2011 16:42:01 | 25.303 | 4/7/2011 13:44:01 | 25.609 |
| 4/11/2011 17:12:01 | 24.490 | 4/7/2011 14:14:01 | 25.609 |
| 4/11/2011 17:42:01 | 24.615 | 4/7/2011 14:44:01 | 25.672 |
| 4/11/2011 18:12:01 | 24.365 | 4/7/2011 15:14:01 | 25.672 |
| 4/11/2011 18:42:01 | 24.115 | 4/7/2011 15:44:01 | 25.672 |
| 4/11/2011 19:12:01 | 24.177 | 4/7/2011 16:14:01 | 25.734 |
| 4/11/2011 19:42:01 | 24.177 | 4/7/2011 16:44:01 | 25.734 |
| 4/11/2011 20:12:01 | 24.177 | 4/7/2011 17:14:01 | 25.797 |
| 4/11/2011 20:42:01 | 24.177 | 4/7/2011 17:44:01 | 25.797 |
| 4/11/2011 21:12:01 | 23.802 | 4/7/2011 18:14:01 | 25.797 |
| 4/11/2011 21:42:01 | 23.552 | 4/7/2011 18:44:01 | 25.859 |
| 4/11/2011 22:12:01 | 23.427 | 4/7/2011 19:14:01 | 25.859 |
| 4/11/2011 22:42:01 | 23.302 | 4/7/2011 19:44:01 | 25.859 |
| 4/11/2011 23:12:01 | 23.365 | 4/7/2011 20:14:01 | 25.859 |
| 4/11/2011 23:42:01 | 23.240 | 4/7/2011 20:44:01 | 25.922 |
| 4/12/2011 00:12:01 | 22.927 | 4/7/2011 21:14:01 | 25.922 |
| 4/12/2011 00:42:01 | 22.739 | 4/7/2011 21:44:01 | 25.922 |
| 4/12/2011 01:12:01 | 22.864 | 4/7/2011 22:14:01 | 25.922 |
| 4/12/2011 01:42:01 | 23.177 | 4/7/2011 22:44:01 | 25.922 |
| 4/12/2011 02:12:01 | 23.177 | 4/7/2011 23:14:01 | 25.922 |
| 4/12/2011 02:42:01 | 23.240 | 4/7/2011 23:44:01 | 25.922 |
| 4/12/2011 03:12:01 | 23.302 | 4/8/2011 00:14:01 | 25.922 |
| 4/12/2011 03:42:01 | 23.177 | 4/8/2011 00:44:01 | 25.922 |
| 4/12/2011 04:12:01 | 23.240 | 4/8/2011 01:14:01 | 25.922 |
| 4/12/2011 04:42:01 | 23.365 | 4/8/2011 01:44:01 | 25.922 |
| 4/12/2011 05:12:01 | 23.177 | 4/8/2011 02:14:01 | 25.922 |
| 4/12/2011 05:42:01 | 23.240 | 4/8/2011 02:44:01 | 25.859 |
| 4/12/2011 06:12:01 | 23.365 | 4/8/2011 03:14:01 | 25.859 |
| 4/12/2011 06:42:01 | 23.552 | 4/8/2011 03:44:01 | 25.859 |
| 4/12/2011 07:12:01 | 23.865 | 4/8/2011 04:14:01 | 25.797 |
| 4/12/2011 07:42:01 | 24.365 | 4/8/2011 04:44:01 | 25.797 |
| 4/12/2011 08:12:01 | 24.490 | 4/8/2011 05:14:01 | 25.797 |
| 4/12/2011 08:42:01 | 24.990 | 4/8/2011 05:44:01 | 25.734 |
| 4/12/2011 09:12:01 | 25.428 | 4/8/2011 06:14:01 | 25.734 |
| 4/12/2011 09:42:01 | 25.927 | 4/8/2011 06:44:01 | 25.734 |
| 4/12/2011 10:12:01 | 27.115 | 4/8/2011 07:14:01 | 25.734 |
| 4/12/2011 10:42:01 | 27.927 | 4/8/2011 07:44:01 | 25.672 |
| 4/12/2011 11:12:01 | 28.926 | 4/8/2011 08:14:01 | 25.672 |

|                    |        |                   |        |
|--------------------|--------|-------------------|--------|
| 4/12/2011 11:42:01 | 29.863 | 4/8/2011 08:44:01 | 25.609 |
| 4/12/2011 12:12:01 | 30.112 | 4/8/2011 09:14:01 | 25.609 |
| 4/12/2011 12:42:01 | 29.738 | 4/8/2011 09:44:01 | 25.609 |
| 4/12/2011 13:12:01 | 29.113 | 4/8/2011 10:14:01 | 25.609 |
| 4/12/2011 13:42:01 | 28.426 | 4/8/2011 10:44:01 | 25.609 |
| 4/12/2011 14:12:01 | 29.363 | 4/8/2011 11:14:01 | 25.609 |
| 4/12/2011 14:42:01 | 28.551 | 4/8/2011 11:44:01 | 25.609 |
| 4/12/2011 15:12:01 | 27.552 | 4/8/2011 12:14:01 | 25.609 |
| 4/12/2011 15:42:01 | 27.927 | 4/8/2011 12:44:01 | 25.672 |
| 4/12/2011 16:12:01 | 27.427 | 4/8/2011 13:14:01 | 25.672 |
| 4/12/2011 16:42:01 | 26.802 | 4/8/2011 13:44:01 | 25.672 |
| 4/12/2011 17:12:01 | 25.990 | 4/8/2011 14:14:01 | 25.734 |
| 4/12/2011 17:42:01 | 25.428 | 4/8/2011 14:44:01 | 25.734 |
| 4/12/2011 18:12:01 | 24.802 | 4/8/2011 15:14:01 | 25.797 |
| 4/12/2011 18:42:01 | 24.177 | 4/8/2011 15:44:01 | 25.797 |
| 4/12/2011 19:12:01 | 23.865 | 4/8/2011 16:14:01 | 25.859 |
| 4/12/2011 19:42:01 | 23.740 | 4/8/2011 16:44:01 | 25.859 |
| 4/12/2011 20:12:01 | 23.802 | 4/8/2011 17:14:01 | 25.859 |
| 4/12/2011 20:42:01 | 23.865 | 4/8/2011 17:44:01 | 25.922 |
| 4/12/2011 21:12:01 | 23.927 | 4/8/2011 18:14:01 | 25.922 |
| 4/12/2011 21:42:01 | 23.802 | 4/8/2011 18:44:01 | 25.922 |
| 4/12/2011 22:12:01 | 23.677 | 4/8/2011 19:14:01 | 25.984 |
| 4/12/2011 22:42:01 | 23.552 | 4/8/2011 19:44:01 | 25.984 |
| 4/12/2011 23:12:01 | 23.490 | 4/8/2011 20:14:01 | 25.984 |
| 4/12/2011 23:42:01 | 23.365 | 4/8/2011 20:44:01 | 25.984 |
| 4/13/2011 00:12:01 | 23.240 | 4/8/2011 21:14:01 | 25.984 |
| 4/13/2011 00:42:01 | 23.177 | 4/8/2011 21:44:01 | 26.047 |
| 4/13/2011 01:12:01 | 23.114 | 4/8/2011 22:14:01 | 25.984 |
| 4/13/2011 01:42:01 | 23.052 | 4/8/2011 22:44:01 | 25.984 |
| 4/13/2011 02:12:01 | 22.864 | 4/8/2011 23:14:01 | 25.984 |
| 4/13/2011 02:42:01 | 22.864 | 4/8/2011 23:44:01 | 25.984 |
| 4/13/2011 03:12:01 | 22.614 | 4/9/2011 00:14:01 | 25.984 |
| 4/13/2011 03:42:01 | 22.552 | 4/9/2011 00:44:01 | 25.984 |
| 4/13/2011 04:12:01 | 22.427 | 4/9/2011 01:14:01 | 25.984 |
| 4/13/2011 04:42:01 | 22.302 | 4/9/2011 01:44:01 | 25.922 |
| 4/13/2011 05:12:01 | 22.302 | 4/9/2011 02:14:01 | 25.922 |
| 4/13/2011 05:42:01 | 22.114 | 4/9/2011 02:44:01 | 25.922 |
| 4/13/2011 06:12:01 | 21.989 | 4/9/2011 03:14:01 | 25.922 |
| 4/13/2011 06:42:01 | 21.926 | 4/9/2011 03:44:01 | 25.922 |
| 4/13/2011 07:12:01 | 22.739 | 4/9/2011 04:14:01 | 25.922 |
| 4/13/2011 07:42:01 | 23.677 | 4/9/2011 04:44:01 | 25.859 |
| 4/13/2011 08:12:01 | 24.802 | 4/9/2011 05:14:01 | 25.859 |
| 4/13/2011 08:42:01 | 26.427 | 4/9/2011 05:44:01 | 25.859 |
| 4/13/2011 09:12:01 | 27.365 | 4/9/2011 06:14:01 | 25.859 |
| 4/13/2011 09:42:01 | 27.739 | 4/9/2011 06:44:01 | 25.797 |
| 4/13/2011 10:12:01 | 28.801 | 4/9/2011 07:14:01 | 25.797 |
| 4/13/2011 10:42:01 | 29.551 | 4/9/2011 07:44:01 | 25.797 |
| 4/13/2011 11:12:01 | 29.863 | 4/9/2011 08:14:01 | 25.797 |
| 4/13/2011 11:42:01 | 31.049 | 4/9/2011 08:44:01 | 25.734 |
| 4/13/2011 12:12:01 | 31.860 | 4/9/2011 09:14:01 | 25.734 |

|                    |        |                    |        |
|--------------------|--------|--------------------|--------|
| 4/13/2011 12:42:01 | 31.174 | 4/9/2011 09:44:01  | 25.734 |
| 4/13/2011 13:12:01 | 30.237 | 4/9/2011 10:14:01  | 25.734 |
| 4/13/2011 13:42:01 | 30.112 | 4/9/2011 10:44:01  | 25.734 |
| 4/13/2011 14:12:01 | 31.236 | 4/9/2011 11:14:01  | 25.734 |
| 4/13/2011 14:42:01 | 29.925 | 4/9/2011 11:44:01  | 25.734 |
| 4/13/2011 15:12:01 | 29.800 | 4/9/2011 12:14:01  | 25.734 |
| 4/13/2011 15:42:01 | 29.113 | 4/9/2011 12:44:01  | 25.797 |
| 4/13/2011 16:12:01 | 27.989 | 4/9/2011 13:14:01  | 25.797 |
| 4/13/2011 16:42:01 | 26.927 | 4/9/2011 13:44:01  | 25.797 |
| 4/13/2011 17:12:01 | 26.240 | 4/9/2011 14:14:01  | 25.859 |
| 4/13/2011 17:42:01 | 25.740 | 4/9/2011 14:44:01  | 25.859 |
| 4/13/2011 18:12:01 | 24.865 | 4/9/2011 15:14:01  | 25.922 |
| 4/13/2011 18:42:01 | 24.302 | 4/9/2011 15:44:01  | 25.922 |
| 4/13/2011 19:12:01 | 23.740 | 4/9/2011 16:14:01  | 25.922 |
| 4/13/2011 19:42:01 | 23.427 | 4/9/2011 16:44:01  | 25.984 |
| 4/13/2011 20:12:01 | 23.615 | 4/9/2011 17:14:01  | 25.984 |
| 4/13/2011 20:42:01 | 23.365 | 4/9/2011 17:44:01  | 25.984 |
| 4/13/2011 21:12:01 | 23.302 | 4/9/2011 18:14:01  | 26.047 |
| 4/13/2011 21:42:01 | 22.989 | 4/9/2011 18:44:01  | 26.047 |
| 4/13/2011 22:12:01 | 22.864 | 4/9/2011 19:14:01  | 26.047 |
| 4/13/2011 22:42:01 | 22.802 | 4/9/2011 19:44:01  | 26.047 |
| 4/13/2011 23:12:01 | 22.739 | 4/9/2011 20:14:01  | 26.047 |
| 4/13/2011 23:42:01 | 22.489 | 4/9/2011 20:44:01  | 26.047 |
| 4/14/2011 00:12:01 | 22.552 | 4/9/2011 21:14:01  | 26.047 |
| 4/14/2011 00:42:01 | 22.302 | 4/9/2011 21:44:01  | 26.109 |
| 4/14/2011 01:12:01 | 21.926 | 4/9/2011 22:14:01  | 26.047 |
| 4/14/2011 01:42:01 | 21.676 | 4/9/2011 22:44:01  | 26.047 |
| 4/14/2011 02:12:01 | 21.739 | 4/9/2011 23:14:01  | 26.047 |
| 4/14/2011 02:42:01 | 21.801 | 4/9/2011 23:44:01  | 26.047 |
| 4/14/2011 03:12:01 | 21.926 | 4/10/2011 00:14:01 | 26.047 |
| 4/14/2011 03:42:01 | 21.614 | 4/10/2011 00:44:01 | 26.047 |
| 4/14/2011 04:12:01 | 21.301 | 4/10/2011 01:14:01 | 26.047 |
| 4/14/2011 04:42:01 | 20.988 | 4/10/2011 01:44:01 | 26.047 |
| 4/14/2011 05:12:01 | 20.613 | 4/10/2011 02:14:01 | 26.047 |
| 4/14/2011 05:42:01 | 20.237 | 4/10/2011 02:44:01 | 25.984 |
| 4/14/2011 06:12:01 | 20.112 | 4/10/2011 03:14:01 | 25.984 |
| 4/14/2011 06:42:01 | 20.362 | 4/10/2011 03:44:01 | 25.984 |
| 4/14/2011 07:12:01 | 21.176 | 4/10/2011 04:14:01 | 25.984 |
| 4/14/2011 07:42:01 | 22.552 | 4/10/2011 04:44:01 | 25.922 |
| 4/14/2011 08:12:01 | 24.865 | 4/10/2011 05:14:01 | 25.922 |
| 4/14/2011 08:42:01 | 25.552 | 4/10/2011 05:44:01 | 25.922 |
| 4/14/2011 09:12:01 | 27.052 | 4/10/2011 06:14:01 | 25.922 |
| 4/14/2011 09:42:01 | 27.802 | 4/10/2011 06:44:01 | 25.859 |
| 4/14/2011 10:12:01 | 28.426 | 4/10/2011 07:14:01 | 25.859 |
| 4/14/2011 10:42:01 | 29.488 | 4/10/2011 07:44:01 | 25.859 |
| 4/14/2011 11:12:01 | 30.237 | 4/10/2011 08:14:01 | 25.859 |
| 4/14/2011 11:42:01 | 31.049 | 4/10/2011 08:44:01 | 25.797 |
| 4/14/2011 12:12:01 | 31.860 | 4/10/2011 09:14:01 | 25.797 |
| 4/14/2011 12:42:01 | 32.110 | 4/10/2011 09:44:01 | 25.797 |
| 4/14/2011 13:12:01 | 32.609 | 4/10/2011 10:14:01 | 25.797 |

|                    |        |                    |        |
|--------------------|--------|--------------------|--------|
| 4/14/2011 13:42:01 | 32.172 | 4/10/2011 10:44:01 | 25.797 |
| 4/14/2011 14:12:01 | 31.548 | 4/10/2011 11:14:01 | 25.797 |
| 4/14/2011 14:42:01 | 31.798 | 4/10/2011 11:44:01 | 25.797 |
| 4/14/2011 15:12:01 | 30.487 | 4/10/2011 12:14:01 | 25.797 |
| 4/14/2011 15:42:01 | 29.863 | 4/10/2011 12:44:01 | 25.859 |
| 4/14/2011 16:12:01 | 29.051 | 4/10/2011 13:14:01 | 25.859 |
| 4/14/2011 16:42:01 | 28.239 | 4/10/2011 13:44:01 | 25.859 |
| 4/14/2011 17:12:01 | 27.240 | 4/10/2011 14:14:01 | 25.859 |
| 4/14/2011 17:42:01 | 26.490 | 4/10/2011 14:44:01 | 25.922 |
| 4/14/2011 18:12:01 | 25.802 | 4/10/2011 15:14:01 | 25.922 |
| 4/14/2011 18:42:01 | 25.052 | 4/10/2011 15:44:01 | 25.984 |
| 4/14/2011 19:12:01 | 24.240 | 4/10/2011 16:14:01 | 25.984 |
| 4/14/2011 19:42:01 | 23.740 | 4/10/2011 16:44:01 | 25.984 |
| 4/14/2011 20:12:01 | 23.365 | 4/10/2011 17:14:01 | 26.047 |
| 4/14/2011 20:42:01 | 22.989 | 4/10/2011 17:44:01 | 26.047 |
| 4/14/2011 21:12:01 | 22.802 | 4/10/2011 18:14:01 | 26.047 |
| 4/14/2011 21:42:01 | 22.739 | 4/10/2011 18:44:01 | 26.047 |
| 4/14/2011 22:12:01 | 22.739 | 4/10/2011 19:14:01 | 26.047 |
| 4/14/2011 22:42:01 | 22.552 | 4/10/2011 19:44:01 | 26.047 |
| 4/14/2011 23:12:01 | 22.739 | 4/10/2011 20:14:01 | 26.047 |
| 4/14/2011 23:42:01 | 22.802 | 4/10/2011 20:44:01 | 26.047 |
| 4/15/2011 00:12:01 | 22.614 | 4/10/2011 21:14:01 | 26.047 |
| 4/15/2011 00:42:01 | 22.364 | 4/10/2011 21:44:01 | 26.047 |
| 4/15/2011 01:12:01 | 22.302 | 4/10/2011 22:14:01 | 26.047 |
| 4/15/2011 01:42:01 | 22.051 | 4/10/2011 22:44:01 | 26.047 |
| 4/15/2011 02:12:01 | 21.926 | 4/10/2011 23:14:01 | 25.984 |
| 4/15/2011 02:42:01 | 21.989 | 4/10/2011 23:44:01 | 25.984 |
| 4/15/2011 03:12:01 | 21.801 | 4/11/2011 00:14:01 | 25.984 |
| 4/15/2011 03:42:01 | 21.614 | 4/11/2011 00:44:01 | 25.984 |
| 4/15/2011 04:12:01 | 21.363 | 4/11/2011 01:14:01 | 25.922 |
| 4/15/2011 04:42:01 | 21.176 | 4/11/2011 01:44:01 | 25.922 |
| 4/15/2011 05:12:01 | 21.238 | 4/11/2011 02:14:01 | 25.922 |
| 4/15/2011 05:42:01 | 21.238 | 4/11/2011 02:44:01 | 25.859 |
| 4/15/2011 06:12:01 | 21.488 | 4/11/2011 03:14:01 | 25.859 |
| 4/15/2011 06:42:01 | 21.676 | 4/11/2011 03:44:01 | 25.859 |
| 4/15/2011 07:12:01 | 22.489 | 4/11/2011 04:14:01 | 25.797 |
| 4/15/2011 07:42:01 | 23.427 | 4/11/2011 04:44:01 | 25.797 |
| 4/15/2011 08:12:01 | 25.240 | 4/11/2011 05:14:01 | 25.797 |
| 4/15/2011 08:42:01 | 26.427 | 4/11/2011 05:44:01 | 25.734 |
| 4/15/2011 09:12:01 | 27.614 | 4/11/2011 06:14:01 | 25.734 |
| 4/15/2011 09:42:01 | 28.739 | 4/11/2011 06:44:01 | 25.734 |
| 4/15/2011 10:12:01 | 29.738 | 4/11/2011 07:14:01 | 25.672 |
| 4/15/2011 10:42:01 | 30.425 | 4/11/2011 07:44:01 | 25.672 |
| 4/15/2011 11:12:01 | 30.612 | 4/11/2011 08:14:01 | 25.672 |
| 4/15/2011 11:42:01 | 31.548 | 4/11/2011 08:44:01 | 25.672 |
| 4/15/2011 12:12:01 | 31.923 | 4/11/2011 09:14:01 | 25.672 |
| 4/15/2011 12:42:01 | 32.297 | 4/11/2011 09:44:01 | 25.672 |
| 4/15/2011 13:12:01 | 32.360 | 4/11/2011 10:14:01 | 25.672 |
| 4/15/2011 13:42:01 | 32.921 | 4/11/2011 10:44:01 | 25.672 |
| 4/15/2011 14:12:01 | 32.484 | 4/11/2011 11:14:01 | 25.672 |

|                    |        |                    |        |
|--------------------|--------|--------------------|--------|
| 4/15/2011 14:42:01 | 31.735 | 4/11/2011 11:44:01 | 25.672 |
| 4/15/2011 15:12:01 | 31.111 | 4/11/2011 12:14:01 | 25.672 |
| 4/15/2011 15:42:01 | 28.739 | 4/11/2011 12:44:01 | 25.672 |
| 4/15/2011 16:12:01 | 28.052 | 4/11/2011 13:14:01 | 25.672 |
| 4/15/2011 16:42:01 | 28.239 | 4/11/2011 13:44:01 | 25.672 |
| 4/15/2011 17:12:01 | 27.052 | 4/11/2011 14:14:01 | 25.734 |
| 4/15/2011 17:42:01 | 27.052 | 4/11/2011 14:44:01 | 25.734 |
| 4/15/2011 18:12:01 | 26.177 | 4/11/2011 15:14:01 | 25.734 |
| 4/15/2011 18:42:01 | 25.115 | 4/11/2011 15:44:01 | 25.734 |
| 4/15/2011 19:12:01 | 24.552 | 4/11/2011 16:14:01 | 25.797 |
| 4/15/2011 19:42:01 | 24.302 | 4/11/2011 16:44:01 | 25.797 |
| 4/15/2011 20:12:01 | 24.490 | 4/11/2011 17:14:01 | 25.797 |
| 4/15/2011 20:42:01 | 24.552 | 4/11/2011 17:44:01 | 25.797 |
| 4/15/2011 21:12:01 | 24.427 | 4/11/2011 18:14:01 | 25.859 |
| 4/15/2011 21:42:01 | 24.552 | 4/11/2011 18:44:01 | 25.859 |
| 4/15/2011 22:12:01 | 24.365 | 4/11/2011 19:14:01 | 25.859 |
| 4/15/2011 22:42:01 | 24.115 | 4/11/2011 19:44:01 | 25.859 |
| 4/15/2011 23:12:01 | 24.365 | 4/11/2011 20:14:01 | 25.859 |
| 4/15/2011 23:42:01 | 23.052 | 4/11/2011 20:44:01 | 25.859 |
| 4/16/2011 00:12:01 | 22.489 | 4/11/2011 21:14:01 | 25.859 |
| 4/16/2011 00:42:01 | 22.489 | 4/11/2011 21:44:01 | 25.859 |
| 4/16/2011 01:12:01 | 22.427 | 4/11/2011 22:14:01 | 25.859 |
| 4/16/2011 01:42:01 | 22.489 | 4/11/2011 22:44:01 | 25.797 |
| 4/16/2011 02:12:01 | 22.552 | 4/11/2011 23:14:01 | 25.797 |
| 4/16/2011 02:42:01 | 22.552 | 4/11/2011 23:44:01 | 25.797 |
| 4/16/2011 03:12:01 | 22.739 | 4/12/2011 00:14:01 | 25.797 |
| 4/16/2011 03:42:01 | 22.802 | 4/12/2011 00:44:01 | 25.797 |
| 4/16/2011 04:12:01 | 22.802 | 4/12/2011 01:14:01 | 25.797 |
| 4/16/2011 04:42:01 | 22.552 | 4/12/2011 01:44:01 | 25.734 |
| 4/16/2011 05:12:01 | 22.427 | 4/12/2011 02:14:01 | 25.734 |
| 4/16/2011 05:42:01 | 21.926 | 4/12/2011 02:44:01 | 25.734 |
| 4/16/2011 06:12:01 | 21.739 | 4/12/2011 03:14:01 | 25.734 |
| 4/16/2011 06:42:01 | 21.801 | 4/12/2011 03:44:01 | 25.672 |
| 4/16/2011 07:12:01 | 22.552 | 4/12/2011 04:14:01 | 25.672 |
| 4/16/2011 07:42:01 | 23.365 | 4/12/2011 04:44:01 | 25.672 |
| 4/16/2011 08:12:01 | 23.927 | 4/12/2011 05:14:01 | 25.672 |
| 4/16/2011 08:42:01 | 24.802 | 4/12/2011 05:44:01 | 25.609 |
| 4/16/2011 09:12:01 | 25.802 | 4/12/2011 06:14:01 | 25.609 |
| 4/16/2011 09:42:01 | 26.240 | 4/12/2011 06:44:01 | 25.609 |
| 4/16/2011 10:12:01 | 26.677 | 4/12/2011 07:14:01 | 25.609 |
| 4/16/2011 10:42:01 | 27.552 | 4/12/2011 07:44:01 | 25.609 |
| 4/16/2011 11:12:01 | 28.551 | 4/12/2011 08:14:01 | 25.547 |
| 4/16/2011 11:42:01 | 27.489 | 4/12/2011 08:44:01 | 25.547 |
| 4/16/2011 12:12:01 | 29.426 | 4/12/2011 09:14:01 | 25.547 |
| 4/16/2011 12:42:01 | 28.052 | 4/12/2011 09:44:01 | 25.547 |
| 4/16/2011 13:12:01 | 29.988 | 4/12/2011 10:14:01 | 25.547 |
| 4/16/2011 13:42:01 | 29.800 | 4/12/2011 10:44:01 | 25.547 |
| 4/16/2011 14:12:01 | 29.738 | 4/12/2011 11:14:01 | 25.547 |
| 4/16/2011 14:42:01 | 29.863 | 4/12/2011 11:44:01 | 25.547 |
| 4/16/2011 15:12:01 | 29.363 | 4/12/2011 12:14:01 | 25.547 |



|                    |        |                    |        |
|--------------------|--------|--------------------|--------|
| 4/16/2011 15:42:01 | 28.177 | 4/12/2011 12:44:01 | 25.609 |
| 4/16/2011 16:12:01 | 27.427 | 4/12/2011 13:14:01 | 25.609 |
| 4/16/2011 16:42:01 | 26.865 | 4/12/2011 13:44:01 | 25.672 |
| 4/16/2011 17:12:01 | 26.365 | 4/12/2011 14:14:01 | 25.672 |
| 4/16/2011 17:42:01 | 25.802 | 4/12/2011 14:44:01 | 25.734 |
| 4/16/2011 18:12:01 | 25.178 | 4/12/2011 15:14:01 | 25.734 |
| 4/16/2011 18:42:01 | 24.802 | 4/12/2011 15:44:01 | 25.797 |
| 4/16/2011 19:12:01 | 24.427 | 4/12/2011 16:14:01 | 25.797 |
| 4/16/2011 19:42:01 | 24.052 | 4/12/2011 16:44:01 | 25.797 |
| 4/16/2011 20:12:01 | 23.677 | 4/12/2011 17:14:01 | 25.859 |
| 4/16/2011 20:42:01 | 23.427 | 4/12/2011 17:44:01 | 25.859 |
| 4/16/2011 21:12:01 | 23.365 | 4/12/2011 18:14:01 | 25.859 |
| 4/16/2011 21:42:01 | 23.302 | 4/12/2011 18:44:01 | 25.859 |
| 4/16/2011 22:12:01 | 23.240 | 4/12/2011 19:14:01 | 25.859 |
| 4/16/2011 22:42:01 | 23.114 | 4/12/2011 19:44:01 | 25.922 |
| 4/16/2011 23:12:01 | 23.052 | 4/12/2011 20:14:01 | 25.922 |
| 4/16/2011 23:42:01 | 22.989 | 4/12/2011 20:44:01 | 25.922 |
| 4/17/2011 00:12:01 | 22.989 | 4/12/2011 21:14:01 | 25.922 |
| 4/17/2011 00:42:01 | 22.927 | 4/12/2011 21:44:01 | 25.922 |
| 4/17/2011 01:12:01 | 22.739 | 4/12/2011 22:14:01 | 25.922 |
| 4/17/2011 01:42:01 | 22.552 | 4/12/2011 22:44:01 | 25.859 |
| 4/17/2011 02:12:01 | 22.302 | 4/12/2011 23:14:01 | 25.859 |
| 4/17/2011 02:42:01 | 22.114 | 4/12/2011 23:44:01 | 25.859 |
| 4/17/2011 03:12:01 | 22.051 | 4/13/2011 00:14:01 | 25.859 |
| 4/17/2011 03:42:01 | 21.926 | 4/13/2011 00:44:01 | 25.859 |
| 4/17/2011 04:12:01 | 22.114 | 4/13/2011 01:14:01 | 25.797 |
| 4/17/2011 04:42:01 | 22.176 | 4/13/2011 01:44:01 | 25.797 |
| 4/17/2011 05:12:01 | 22.114 | 4/13/2011 02:14:01 | 25.797 |
| 4/17/2011 05:42:01 | 22.051 | 4/13/2011 02:44:01 | 25.797 |
| 4/17/2011 06:12:01 | 21.864 | 4/13/2011 03:14:01 | 25.797 |
| 4/17/2011 06:42:01 | 22.239 | 4/13/2011 03:44:01 | 25.734 |
| 4/17/2011 07:12:01 | 23.240 | 4/13/2011 04:14:01 | 25.734 |
| 4/17/2011 07:42:01 | 24.302 | 4/13/2011 04:44:01 | 25.734 |
| 4/17/2011 08:12:01 | 25.365 | 4/13/2011 05:14:01 | 25.734 |
| 4/17/2011 08:42:01 | 26.365 | 4/13/2011 05:44:01 | 25.672 |
| 4/17/2011 09:12:01 | 26.802 | 4/13/2011 06:14:01 | 25.672 |
| 4/17/2011 09:42:01 | 28.177 | 4/13/2011 06:44:01 | 25.672 |
| 4/17/2011 10:12:01 | 28.614 | 4/13/2011 07:14:01 | 25.609 |
| 4/17/2011 10:42:01 | 29.363 | 4/13/2011 07:44:01 | 25.609 |
| 4/17/2011 11:12:01 | 30.112 | 4/13/2011 08:14:01 | 25.609 |
| 4/17/2011 11:42:01 | 30.799 | 4/13/2011 08:44:01 | 25.547 |
| 4/17/2011 12:12:01 | 31.111 | 4/13/2011 09:14:01 | 25.547 |
| 4/17/2011 12:42:01 | 31.423 | 4/13/2011 09:44:01 | 25.547 |
| 4/17/2011 13:12:01 | 31.548 | 4/13/2011 10:14:01 | 25.547 |
| 4/17/2011 13:42:01 | 31.548 | 4/13/2011 10:44:01 | 25.547 |
| 4/17/2011 14:12:01 | 31.423 | 4/13/2011 11:14:01 | 25.547 |
| 4/17/2011 14:42:01 | 30.924 | 4/13/2011 11:44:01 | 25.547 |
| 4/17/2011 15:12:01 | 30.300 | 4/13/2011 12:14:01 | 25.547 |
| 4/17/2011 15:42:01 | 28.676 | 4/13/2011 12:44:01 | 25.609 |
| 4/17/2011 16:12:01 | 27.864 | 4/13/2011 13:14:01 | 25.609 |

|                    |        |                    |        |
|--------------------|--------|--------------------|--------|
| 4/17/2011 16:42:01 | 27.177 | 4/13/2011 13:44:01 | 25.672 |
| 4/17/2011 17:12:01 | 26.740 | 4/13/2011 14:14:01 | 25.672 |
| 4/17/2011 17:42:01 | 26.240 | 4/13/2011 14:44:01 | 25.734 |
| 4/17/2011 18:12:01 | 25.740 | 4/13/2011 15:14:01 | 25.797 |
| 4/17/2011 18:42:01 | 25.178 | 4/13/2011 15:44:01 | 25.797 |
| 4/17/2011 19:12:01 | 24.865 | 4/13/2011 16:14:01 | 25.797 |
| 4/17/2011 19:42:01 | 24.490 | 4/13/2011 16:44:01 | 25.859 |
| 4/17/2011 20:12:01 | 24.240 | 4/13/2011 17:14:01 | 25.859 |
| 4/17/2011 20:42:01 | 24.052 | 4/13/2011 17:44:01 | 25.922 |
| 4/17/2011 21:12:01 | 24.115 | 4/13/2011 18:14:01 | 25.922 |
| 4/17/2011 21:42:01 | 24.177 | 4/13/2011 18:44:01 | 25.922 |
| 4/17/2011 22:12:01 | 24.240 | 4/13/2011 19:14:01 | 25.922 |
| 4/17/2011 22:42:01 | 24.240 | 4/13/2011 19:44:01 | 25.922 |
| 4/17/2011 23:12:01 | 24.427 | 4/13/2011 20:14:01 | 25.984 |
| 4/17/2011 23:42:01 | 24.365 | 4/13/2011 20:44:01 | 25.984 |
| 4/18/2011 00:12:01 | 24.240 | 4/13/2011 21:14:01 | 25.984 |
| 4/18/2011 00:42:01 | 24.177 | 4/13/2011 21:44:01 | 25.922 |
| 4/18/2011 01:12:01 | 23.865 | 4/13/2011 22:14:01 | 25.922 |
| 4/18/2011 01:42:01 | 23.427 | 4/13/2011 22:44:01 | 25.922 |
| 4/18/2011 02:12:01 | 23.365 | 4/13/2011 23:14:01 | 25.922 |
| 4/18/2011 02:42:01 | 23.490 | 4/13/2011 23:44:01 | 25.922 |
| 4/18/2011 03:12:01 | 23.490 | 4/14/2011 00:14:01 | 25.859 |
| 4/18/2011 03:42:01 | 23.302 | 4/14/2011 00:44:01 | 25.859 |
| 4/18/2011 04:12:01 | 22.927 | 4/14/2011 01:14:01 | 25.859 |
| 4/18/2011 04:42:01 | 22.614 | 4/14/2011 01:44:01 | 25.797 |
| 4/18/2011 05:12:01 | 22.239 | 4/14/2011 02:14:01 | 25.797 |
| 4/18/2011 05:42:01 | 22.051 | 4/14/2011 02:44:01 | 25.797 |
| 4/18/2011 06:12:01 | 22.427 | 4/14/2011 03:14:01 | 25.734 |
| 4/18/2011 06:42:01 | 22.989 | 4/14/2011 03:44:01 | 25.734 |
| 4/18/2011 07:12:01 | 23.490 | 4/14/2011 04:14:01 | 25.734 |
| 4/18/2011 07:42:01 | 23.677 | 4/14/2011 04:44:01 | 25.672 |
| 4/18/2011 08:12:01 | 24.427 | 4/14/2011 05:14:01 | 25.672 |
| 4/18/2011 08:42:01 | 25.178 | 4/14/2011 05:44:01 | 25.609 |
| 4/18/2011 09:12:01 | 26.115 | 4/14/2011 06:14:01 | 25.609 |
| 4/18/2011 09:42:01 | 26.552 | 4/14/2011 06:44:01 | 25.609 |
| 4/18/2011 10:12:01 | 27.115 | 4/14/2011 07:14:01 | 25.547 |
| 4/18/2011 10:42:01 | 27.927 | 4/14/2011 07:44:01 | 25.547 |
| 4/18/2011 11:12:01 | 28.801 | 4/14/2011 08:14:01 | 25.484 |
| 4/18/2011 11:42:01 | 29.551 | 4/14/2011 08:44:01 | 25.484 |
| 4/18/2011 12:12:01 | 30.237 | 4/14/2011 09:14:01 | 25.422 |
| 4/18/2011 12:42:01 | 30.487 | 4/14/2011 09:44:01 | 25.422 |
| 4/18/2011 13:12:01 | 30.799 | 4/14/2011 10:14:01 | 25.422 |
| 4/18/2011 13:42:01 | 30.986 | 4/14/2011 10:44:01 | 25.422 |
| 4/18/2011 14:12:01 | 30.924 | 4/14/2011 11:14:01 | 25.422 |
| 4/18/2011 14:42:01 | 30.612 | 4/14/2011 11:44:01 | 25.422 |
| 4/18/2011 15:12:01 | 29.925 | 4/14/2011 12:14:01 | 25.422 |
| 4/18/2011 15:42:01 | 28.426 | 4/14/2011 12:44:01 | 25.484 |
| 4/18/2011 16:12:01 | 27.552 | 4/14/2011 13:14:01 | 25.484 |
| 4/18/2011 16:42:01 | 27.240 | 4/14/2011 13:44:01 | 25.547 |
| 4/18/2011 17:12:01 | 26.865 | 4/14/2011 14:14:01 | 25.547 |

|                    |        |                    |        |
|--------------------|--------|--------------------|--------|
| 4/18/2011 17:42:01 | 26.240 | 4/14/2011 14:44:01 | 25.609 |
| 4/18/2011 18:12:01 | 25.552 | 4/14/2011 15:14:01 | 25.609 |
| 4/18/2011 18:42:01 | 25.052 | 4/14/2011 15:44:01 | 25.672 |
| 4/18/2011 19:12:01 | 24.677 | 4/14/2011 16:14:01 | 25.672 |
| 4/18/2011 19:42:01 | 24.240 | 4/14/2011 16:44:01 | 25.734 |
| 4/18/2011 20:12:01 | 23.865 | 4/14/2011 17:14:01 | 25.734 |
| 4/18/2011 20:42:01 | 23.615 | 4/14/2011 17:44:01 | 25.734 |
| 4/18/2011 21:12:01 | 23.615 | 4/14/2011 18:14:01 | 25.797 |
| 4/18/2011 21:42:01 | 23.427 | 4/14/2011 18:44:01 | 25.797 |
| 4/18/2011 22:12:01 | 23.302 | 4/14/2011 19:14:01 | 25.859 |
| 4/18/2011 22:42:01 | 23.490 | 4/14/2011 19:44:01 | 25.859 |
| 4/18/2011 23:12:01 | 23.865 | 4/14/2011 20:14:01 | 25.859 |
| 4/18/2011 23:42:01 | 24.240 | 4/14/2011 20:44:01 | 25.859 |
| 4/19/2011 00:12:01 | 24.240 | 4/14/2011 21:14:01 | 25.859 |
| 4/19/2011 00:42:01 | 24.427 | 4/14/2011 21:44:01 | 25.859 |
| 4/19/2011 01:12:01 | 24.552 | 4/14/2011 22:14:01 | 25.859 |
| 4/19/2011 01:42:01 | 24.302 | 4/14/2011 22:44:01 | 25.859 |
| 4/19/2011 02:12:01 | 24.365 | 4/14/2011 23:14:01 | 25.859 |
| 4/19/2011 02:42:01 | 24.490 | 4/14/2011 23:44:01 | 25.797 |
| 4/19/2011 03:12:01 | 24.427 | 4/15/2011 00:14:01 | 25.797 |
| 4/19/2011 03:42:01 | 24.365 | 4/15/2011 00:44:01 | 25.797 |
| 4/19/2011 04:12:01 | 24.365 | 4/15/2011 01:14:01 | 25.734 |
| 4/19/2011 04:42:01 | 24.427 | 4/15/2011 01:44:01 | 25.734 |
| 4/19/2011 05:12:01 | 24.240 | 4/15/2011 02:14:01 | 25.734 |
| 4/19/2011 05:42:01 | 24.052 | 4/15/2011 02:44:01 | 25.734 |
| 4/19/2011 06:12:01 | 23.740 | 4/15/2011 03:14:01 | 25.672 |
| 4/19/2011 06:42:01 | 23.615 | 4/15/2011 03:44:01 | 25.672 |
| 4/19/2011 07:12:01 | 24.177 | 4/15/2011 04:14:01 | 25.609 |
| 4/19/2011 07:42:01 | 24.927 | 4/15/2011 04:44:01 | 25.609 |
| 4/19/2011 08:12:01 | 25.615 | 4/15/2011 05:14:01 | 25.609 |
| 4/19/2011 08:42:01 | 26.177 | 4/15/2011 05:44:01 | 25.547 |
| 4/19/2011 09:12:01 | 26.802 | 4/15/2011 06:14:01 | 25.547 |
| 4/19/2011 09:42:01 | 27.427 | 4/15/2011 06:44:01 | 25.547 |
| 4/19/2011 10:12:01 | 27.927 | 4/15/2011 07:14:01 | 25.484 |
| 4/19/2011 10:42:01 | 28.926 | 4/15/2011 07:44:01 | 25.484 |
| 4/19/2011 11:12:01 | 29.613 | 4/15/2011 08:14:01 | 25.422 |
| 4/19/2011 11:42:01 | 30.112 | 4/15/2011 08:44:01 | 25.422 |
| 4/19/2011 12:12:01 | 30.674 | 4/15/2011 09:14:01 | 25.422 |
| 4/19/2011 12:42:01 | 30.986 | 4/15/2011 09:44:01 | 25.359 |
| 4/19/2011 13:12:01 | 31.361 | 4/15/2011 10:14:01 | 25.359 |
| 4/19/2011 13:42:01 | 31.174 | 4/15/2011 10:44:01 | 25.359 |
| 4/19/2011 14:12:01 | 30.487 | 4/15/2011 11:14:01 | 25.422 |
| 4/19/2011 14:42:01 | 30.986 | 4/15/2011 11:44:01 | 25.422 |
| 4/19/2011 15:12:01 | 29.988 | 4/15/2011 12:14:01 | 25.422 |
| 4/19/2011 15:42:01 | 28.739 | 4/15/2011 12:44:01 | 25.484 |
| 4/19/2011 16:12:01 | 27.677 | 4/15/2011 13:14:01 | 25.547 |
| 4/19/2011 16:42:01 | 27.365 | 4/15/2011 13:44:01 | 25.547 |
| 4/19/2011 17:12:01 | 26.677 | 4/15/2011 14:14:01 | 25.609 |
| 4/19/2011 17:42:01 | 26.177 | 4/15/2011 14:44:01 | 25.609 |
| 4/19/2011 18:12:01 | 25.178 | 4/15/2011 15:14:01 | 25.672 |

|                    |        |                    |        |
|--------------------|--------|--------------------|--------|
| 4/19/2011 18:42:01 | 24.677 | 4/15/2011 15:44:01 | 25.734 |
| 4/19/2011 19:12:01 | 24.427 | 4/15/2011 16:14:01 | 25.734 |
| 4/19/2011 19:42:01 | 24.240 | 4/15/2011 16:44:01 | 25.797 |
| 4/19/2011 20:12:01 | 23.802 | 4/15/2011 17:14:01 | 25.797 |
| 4/19/2011 20:42:01 | 23.365 | 4/15/2011 17:44:01 | 25.859 |
| 4/19/2011 21:12:01 | 23.177 | 4/15/2011 18:14:01 | 25.859 |
| 4/19/2011 21:42:01 | 23.114 | 4/15/2011 18:44:01 | 25.859 |
| 4/19/2011 22:12:01 | 23.240 | 4/15/2011 19:14:01 | 25.922 |
| 4/19/2011 22:42:01 | 23.365 | 4/15/2011 19:44:01 | 25.922 |
| 4/19/2011 23:12:01 | 23.740 | 4/15/2011 20:14:01 | 25.922 |
| 4/19/2011 23:42:01 | 23.865 | 4/15/2011 20:44:01 | 25.922 |
| 4/20/2011 00:12:01 | 23.615 | 4/15/2011 21:14:01 | 25.922 |
| 4/20/2011 00:42:01 | 23.427 | 4/15/2011 21:44:01 | 25.922 |
| 4/20/2011 01:12:01 | 23.114 | 4/15/2011 22:14:01 | 25.922 |
| 4/20/2011 01:42:01 | 22.864 | 4/15/2011 22:44:01 | 25.922 |
| 4/20/2011 02:12:01 | 22.989 | 4/15/2011 23:14:01 | 25.922 |
| 4/20/2011 02:42:01 | 23.052 | 4/15/2011 23:44:01 | 25.922 |
| 4/20/2011 03:12:01 | 22.677 | 4/16/2011 00:14:01 | 25.797 |
| 4/20/2011 03:42:01 | 22.552 | 4/16/2011 00:44:01 | 25.797 |
| 4/20/2011 04:12:01 | 22.677 | 4/16/2011 01:14:01 | 25.734 |
| 4/20/2011 04:42:01 | 22.489 | 4/16/2011 01:44:01 | 25.734 |
| 4/20/2011 05:12:01 | 22.614 | 4/16/2011 02:14:01 | 25.672 |
| 4/20/2011 05:42:01 | 22.427 | 4/16/2011 02:44:01 | 25.672 |
| 4/20/2011 06:12:01 | 22.427 | 4/16/2011 03:14:01 | 25.609 |
| 4/20/2011 06:42:01 | 23.114 | 4/16/2011 03:44:01 | 25.609 |
| 4/20/2011 07:12:01 | 23.865 | 4/16/2011 04:14:01 | 25.547 |
| 4/20/2011 07:42:01 | 24.802 | 4/16/2011 04:44:01 | 25.547 |
| 4/20/2011 08:12:01 | 26.052 | 4/16/2011 05:14:01 | 25.547 |
| 4/20/2011 08:42:01 | 27.052 | 4/16/2011 05:44:01 | 25.484 |
| 4/20/2011 09:12:01 | 28.364 | 4/16/2011 06:14:01 | 25.484 |
| 4/20/2011 09:42:01 | 29.051 | 4/16/2011 06:44:01 | 25.484 |
| 4/20/2011 10:12:01 | 29.613 | 4/16/2011 07:14:01 | 25.422 |
| 4/20/2011 10:42:01 | 29.988 | 4/16/2011 07:44:01 | 25.422 |
| 4/20/2011 11:12:01 | 30.612 | 4/16/2011 08:14:01 | 25.422 |
| 4/20/2011 11:42:01 | 30.924 | 4/16/2011 08:44:01 | 25.422 |
| 4/20/2011 12:12:01 | 31.548 | 4/16/2011 09:14:01 | 25.359 |
| 4/20/2011 12:42:01 | 31.673 | 4/16/2011 09:44:01 | 25.359 |
| 4/20/2011 13:12:01 | 31.860 | 4/16/2011 10:14:01 | 25.359 |
| 4/20/2011 13:42:01 | 32.048 | 4/16/2011 10:44:01 | 25.359 |
| 4/20/2011 14:12:01 | 31.486 | 4/16/2011 11:14:01 | 25.359 |
| 4/20/2011 14:42:01 | 30.986 | 4/16/2011 11:44:01 | 25.359 |
| 4/20/2011 15:12:01 | 30.487 | 4/16/2011 12:14:01 | 25.422 |
| 4/20/2011 15:42:01 | 28.801 | 4/16/2011 12:44:01 | 25.422 |
| 4/20/2011 16:12:01 | 28.239 | 4/16/2011 13:14:01 | 25.422 |
| 4/20/2011 16:42:01 | 27.739 | 4/16/2011 13:44:01 | 25.484 |
| 4/20/2011 17:12:01 | 26.990 | 4/16/2011 14:14:01 | 25.484 |
| 4/20/2011 17:42:01 | 26.177 | 4/16/2011 14:44:01 | 25.484 |
| 4/20/2011 18:12:01 | 25.365 | 4/16/2011 15:14:01 | 25.547 |
| 4/20/2011 18:42:01 | 24.802 | 4/16/2011 15:44:01 | 25.547 |
| 4/20/2011 19:12:01 | 24.302 | 4/16/2011 16:14:01 | 25.609 |

|                    |        |                    |        |
|--------------------|--------|--------------------|--------|
| 4/20/2011 19:42:01 | 23.802 | 4/16/2011 16:44:01 | 25.609 |
| 4/20/2011 20:12:01 | 23.615 | 4/16/2011 17:14:01 | 25.609 |
| 4/20/2011 20:42:01 | 23.302 | 4/16/2011 17:44:01 | 25.672 |
| 4/20/2011 21:12:01 | 23.240 | 4/16/2011 18:14:01 | 25.672 |
| 4/20/2011 21:42:01 | 23.490 | 4/16/2011 18:44:01 | 25.672 |
| 4/20/2011 22:12:01 | 23.615 | 4/16/2011 19:14:01 | 25.672 |
| 4/20/2011 22:42:01 | 23.865 | 4/16/2011 19:44:01 | 25.734 |
| 4/20/2011 23:12:01 | 23.802 | 4/16/2011 20:14:01 | 25.734 |
| 4/20/2011 23:42:01 | 23.552 | 4/16/2011 20:44:01 | 25.734 |
| 4/21/2011 00:12:01 | 23.802 | 4/16/2011 21:14:01 | 25.734 |
| 4/21/2011 00:42:01 | 23.927 | 4/16/2011 21:44:01 | 25.734 |
| 4/21/2011 01:12:01 | 23.927 | 4/16/2011 22:14:01 | 25.734 |
| 4/21/2011 01:42:01 | 23.740 | 4/16/2011 22:44:01 | 25.734 |
| 4/21/2011 02:12:01 | 23.615 | 4/16/2011 23:14:01 | 25.734 |
| 4/21/2011 02:42:01 | 23.240 | 4/16/2011 23:44:01 | 25.734 |
| 4/21/2011 03:12:01 | 23.302 | 4/17/2011 00:14:01 | 25.734 |
| 4/21/2011 03:42:01 | 23.052 | 4/17/2011 00:44:01 | 25.672 |
| 4/21/2011 04:12:01 | 22.927 | 4/17/2011 01:14:01 | 25.672 |
| 4/21/2011 04:42:01 | 22.864 | 4/17/2011 01:44:01 | 25.672 |
| 4/21/2011 05:12:01 | 22.864 | 4/17/2011 02:14:01 | 25.672 |
| 4/21/2011 05:42:01 | 22.802 | 4/17/2011 02:44:01 | 25.609 |
| 4/21/2011 06:12:01 | 22.802 | 4/17/2011 03:14:01 | 25.609 |
| 4/21/2011 06:42:01 | 22.864 | 4/17/2011 03:44:01 | 25.609 |
| 4/21/2011 07:12:01 | 22.989 | 4/17/2011 04:14:01 | 25.609 |
| 4/21/2011 07:42:01 | 23.677 | 4/17/2011 04:44:01 | 25.547 |
| 4/21/2011 08:12:01 | 24.990 | 4/17/2011 05:14:01 | 25.547 |
| 4/21/2011 08:42:01 | 25.428 | 4/17/2011 05:44:01 | 25.547 |
| 4/21/2011 09:12:01 | 26.365 | 4/17/2011 06:14:01 | 25.484 |
| 4/21/2011 09:42:01 | 27.115 | 4/17/2011 06:44:01 | 25.484 |
| 4/21/2011 10:12:01 | 28.052 | 4/17/2011 07:14:01 | 25.484 |
| 4/21/2011 10:42:01 | 28.989 | 4/17/2011 07:44:01 | 25.484 |
| 4/21/2011 11:12:01 | 29.988 | 4/17/2011 08:14:01 | 25.422 |
| 4/21/2011 11:42:01 | 30.674 | 4/17/2011 08:44:01 | 25.422 |
| 4/21/2011 12:12:01 | 31.111 | 4/17/2011 09:14:01 | 25.422 |
| 4/21/2011 12:42:01 | 31.361 | 4/17/2011 09:44:01 | 25.422 |
| 4/21/2011 13:12:01 | 31.423 | 4/17/2011 10:14:01 | 25.422 |
| 4/21/2011 13:42:01 | 31.611 | 4/17/2011 10:44:01 | 25.422 |
| 4/21/2011 14:12:01 | 31.361 | 4/17/2011 11:14:01 | 25.422 |
| 4/21/2011 14:42:01 | 31.361 | 4/17/2011 11:44:01 | 25.422 |
| 4/21/2011 15:12:01 | 30.362 | 4/17/2011 12:14:01 | 25.484 |
| 4/21/2011 15:42:01 | 28.926 | 4/17/2011 12:44:01 | 25.484 |
| 4/21/2011 16:12:01 | 27.927 | 4/17/2011 13:14:01 | 25.484 |
| 4/21/2011 16:42:01 | 26.927 | 4/17/2011 13:44:01 | 25.547 |
| 4/21/2011 17:12:01 | 26.365 | 4/17/2011 14:14:01 | 25.547 |
| 4/21/2011 17:42:01 | 25.802 | 4/17/2011 14:44:01 | 25.609 |
| 4/21/2011 18:12:01 | 25.240 | 4/17/2011 15:14:01 | 25.609 |
| 4/21/2011 18:42:01 | 24.615 | 4/17/2011 15:44:01 | 25.672 |
| 4/21/2011 19:12:01 | 23.927 | 4/17/2011 16:14:01 | 25.672 |
| 4/21/2011 19:42:01 | 23.302 | 4/17/2011 16:44:01 | 25.672 |
| 4/21/2011 20:12:01 | 22.802 | 4/17/2011 17:14:01 | 25.734 |

|                    |        |                    |        |
|--------------------|--------|--------------------|--------|
| 4/21/2011 20:42:01 | 22.364 | 4/17/2011 17:44:01 | 25.734 |
| 4/21/2011 21:12:01 | 22.114 | 4/17/2011 18:14:01 | 25.734 |
| 4/21/2011 21:42:01 | 21.926 | 4/17/2011 18:44:01 | 25.797 |
| 4/21/2011 22:12:01 | 21.676 | 4/17/2011 19:14:01 | 25.797 |
| 4/21/2011 22:42:01 | 21.676 | 4/17/2011 19:44:01 | 25.797 |
| 4/21/2011 23:12:01 | 21.614 | 4/17/2011 20:14:01 | 25.797 |
| 4/21/2011 23:42:01 | 21.614 | 4/17/2011 20:44:01 | 25.797 |
| 4/22/2011 00:12:01 | 21.551 | 4/17/2011 21:14:01 | 25.797 |
| 4/22/2011 00:42:01 | 21.801 | 4/17/2011 21:44:01 | 25.859 |
| 4/22/2011 01:12:01 | 22.051 | 4/17/2011 22:14:01 | 25.797 |
| 4/22/2011 01:42:01 | 22.176 | 4/17/2011 22:44:01 | 25.797 |
| 4/22/2011 02:12:01 | 21.989 | 4/17/2011 23:14:01 | 25.797 |
| 4/22/2011 02:42:01 | 21.926 | 4/17/2011 23:44:01 | 25.797 |
| 4/22/2011 03:12:01 | 22.051 | 4/18/2011 00:14:01 | 25.797 |
| 4/22/2011 03:42:01 | 22.176 | 4/18/2011 00:44:01 | 25.797 |
| 4/22/2011 04:12:01 | 22.364 | 4/18/2011 01:14:01 | 25.797 |
| 4/22/2011 04:42:01 | 22.552 | 4/18/2011 01:44:01 | 25.797 |
| 4/22/2011 05:12:01 | 22.427 | 4/18/2011 02:14:01 | 25.797 |
| 4/22/2011 05:42:01 | 22.489 | 4/18/2011 02:44:01 | 25.734 |
| 4/22/2011 06:12:01 | 22.427 | 4/18/2011 03:14:01 | 25.734 |
| 4/22/2011 06:42:01 | 22.552 | 4/18/2011 03:44:01 | 25.734 |
| 4/22/2011 07:12:01 | 23.114 | 4/18/2011 04:14:01 | 25.734 |
| 4/22/2011 07:42:01 | 23.990 | 4/18/2011 04:44:01 | 25.734 |
| 4/22/2011 08:12:01 | 25.178 | 4/18/2011 05:14:01 | 25.734 |
| 4/22/2011 08:42:01 | 26.490 | 4/18/2011 05:44:01 | 25.672 |
| 4/22/2011 09:12:01 | 27.677 | 4/18/2011 06:14:01 | 25.672 |
| 4/22/2011 09:42:01 | 28.426 | 4/18/2011 06:44:01 | 25.672 |
| 4/22/2011 10:12:01 | 29.363 | 4/18/2011 07:14:01 | 25.672 |
| 4/22/2011 10:42:01 | 30.175 | 4/18/2011 07:44:01 | 25.609 |
| 4/22/2011 11:12:01 | 30.799 | 4/18/2011 08:14:01 | 25.609 |
| 4/22/2011 11:42:01 | 31.486 | 4/18/2011 08:44:01 | 25.609 |
| 4/22/2011 12:12:01 | 32.484 | 4/18/2011 09:14:01 | 25.547 |
| 4/22/2011 12:42:01 | 31.299 | 4/18/2011 09:44:01 | 25.547 |
| 4/22/2011 13:12:01 | 31.923 | 4/18/2011 10:14:01 | 25.547 |
| 4/22/2011 13:42:01 | 30.050 | 4/18/2011 10:44:01 | 25.547 |
| 4/22/2011 14:12:01 | 30.674 | 4/18/2011 11:14:01 | 25.547 |
| 4/22/2011 14:42:01 | 31.611 | 4/18/2011 11:44:01 | 25.609 |
| 4/22/2011 15:12:01 | 30.175 | 4/18/2011 12:14:01 | 25.609 |
| 4/22/2011 15:42:01 | 28.801 | 4/18/2011 12:44:01 | 25.609 |
| 4/22/2011 16:12:01 | 28.989 | 4/18/2011 13:14:01 | 25.609 |
| 4/22/2011 16:42:01 | 28.177 | 4/18/2011 13:44:01 | 25.672 |
| 4/22/2011 17:12:01 | 27.240 | 4/18/2011 14:14:01 | 25.672 |
| 4/22/2011 17:42:01 | 26.302 | 4/18/2011 14:44:01 | 25.672 |
| 4/22/2011 18:12:01 | 25.615 | 4/18/2011 15:14:01 | 25.734 |
| 4/22/2011 18:42:01 | 24.990 | 4/18/2011 15:44:01 | 25.734 |
| 4/22/2011 19:12:01 | 24.615 | 4/18/2011 16:14:01 | 25.734 |
| 4/22/2011 19:42:01 | 24.427 | 4/18/2011 16:44:01 | 25.734 |
| 4/22/2011 20:12:01 | 24.115 | 4/18/2011 17:14:01 | 25.797 |
| 4/22/2011 20:42:01 | 23.802 | 4/18/2011 17:44:01 | 25.797 |
| 4/22/2011 21:12:01 | 23.740 | 4/18/2011 18:14:01 | 25.797 |

|                    |        |                    |        |
|--------------------|--------|--------------------|--------|
| 4/22/2011 21:42:01 | 23.865 | 4/18/2011 18:44:01 | 25.859 |
| 4/22/2011 22:12:01 | 23.927 | 4/18/2011 19:14:01 | 25.859 |
| 4/22/2011 22:42:01 | 23.802 | 4/18/2011 19:44:01 | 25.859 |
| 4/22/2011 23:12:01 | 23.427 | 4/18/2011 20:14:01 | 25.859 |
| 4/22/2011 23:42:01 | 23.427 | 4/18/2011 20:44:01 | 25.859 |
| 4/23/2011 00:12:01 | 23.302 | 4/18/2011 21:14:01 | 25.859 |
| 4/23/2011 00:42:01 | 23.114 | 4/18/2011 21:44:01 | 25.859 |
| 4/23/2011 01:12:01 | 22.927 | 4/18/2011 22:14:01 | 25.859 |
| 4/23/2011 01:42:01 | 23.114 | 4/18/2011 22:44:01 | 25.859 |
| 4/23/2011 02:12:01 | 23.302 | 4/18/2011 23:14:01 | 25.859 |
| 4/23/2011 02:42:01 | 23.114 | 4/18/2011 23:44:01 | 25.859 |
| 4/23/2011 03:12:01 | 22.864 | 4/19/2011 00:14:01 | 25.859 |
| 4/23/2011 03:42:01 | 22.677 | 4/19/2011 00:44:01 | 25.797 |
| 4/23/2011 04:12:01 | 22.614 | 4/19/2011 01:14:01 | 25.797 |
| 4/23/2011 04:42:01 | 22.927 | 4/19/2011 01:44:01 | 25.797 |
| 4/23/2011 05:12:01 | 23.114 | 4/19/2011 02:14:01 | 25.797 |
| 4/23/2011 05:42:01 | 23.177 | 4/19/2011 02:44:01 | 25.797 |
| 4/23/2011 06:12:01 | 22.989 | 4/19/2011 03:14:01 | 25.734 |
| 4/23/2011 06:42:01 | 22.989 | 4/19/2011 03:44:01 | 25.734 |
| 4/23/2011 07:12:01 | 23.552 | 4/19/2011 04:14:01 | 25.734 |
| 4/23/2011 07:42:01 | 23.802 | 4/19/2011 04:44:01 | 25.734 |
| 4/23/2011 08:12:01 | 25.115 | 4/19/2011 05:14:01 | 25.734 |
| 4/23/2011 08:42:01 | 26.552 | 4/19/2011 05:44:01 | 25.734 |
| 4/23/2011 09:12:01 | 27.802 | 4/19/2011 06:14:01 | 25.734 |
| 4/23/2011 09:42:01 | 28.489 | 4/19/2011 06:44:01 | 25.734 |
| 4/23/2011 10:12:01 | 29.301 | 4/19/2011 07:14:01 | 25.734 |
| 4/23/2011 10:42:01 | 30.050 | 4/19/2011 07:44:01 | 25.734 |
| 4/23/2011 11:12:01 | 30.924 | 4/19/2011 08:14:01 | 25.734 |
| 4/23/2011 11:42:01 | 31.548 | 4/19/2011 08:44:01 | 25.672 |
| 4/23/2011 12:12:01 | 31.985 | 4/19/2011 09:14:01 | 25.672 |
| 4/23/2011 12:42:01 | 32.422 | 4/19/2011 09:44:01 | 25.672 |
| 4/23/2011 13:12:01 | 32.360 | 4/19/2011 10:14:01 | 25.672 |
| 4/23/2011 13:42:01 | 32.609 | 4/19/2011 10:44:01 | 25.672 |
| 4/23/2011 14:12:01 | 32.672 | 4/19/2011 11:14:01 | 25.734 |
| 4/23/2011 14:42:01 | 32.921 | 4/19/2011 11:44:01 | 25.734 |
| 4/23/2011 15:12:01 | 31.423 | 4/19/2011 12:14:01 | 25.734 |
| 4/23/2011 15:42:01 | 30.487 | 4/19/2011 12:44:01 | 25.797 |
| 4/23/2011 16:12:01 | 29.113 | 4/19/2011 13:14:01 | 25.797 |
| 4/23/2011 16:42:01 | 28.052 | 4/19/2011 13:44:01 | 25.797 |
| 4/23/2011 17:12:01 | 27.427 | 4/19/2011 14:14:01 | 25.859 |
| 4/23/2011 17:42:01 | 26.677 | 4/19/2011 14:44:01 | 25.859 |
| 4/23/2011 18:12:01 | 25.865 | 4/19/2011 15:14:01 | 25.859 |
| 4/23/2011 18:42:01 | 25.802 | 4/19/2011 15:44:01 | 25.922 |
| 4/23/2011 19:12:01 | 25.677 | 4/19/2011 16:14:01 | 25.922 |
| 4/23/2011 19:42:01 | 25.552 | 4/19/2011 16:44:01 | 25.922 |
| 4/23/2011 20:12:01 | 25.428 | 4/19/2011 17:14:01 | 25.984 |
| 4/23/2011 20:42:01 | 25.240 | 4/19/2011 17:44:01 | 25.984 |
| 4/23/2011 21:12:01 | 24.990 | 4/19/2011 18:14:01 | 25.984 |
| 4/23/2011 21:42:01 | 24.927 | 4/19/2011 18:44:01 | 25.984 |
| 4/23/2011 22:12:01 | 24.552 | 4/19/2011 19:14:01 | 26.047 |

|                    |        |                    |        |
|--------------------|--------|--------------------|--------|
| 4/23/2011 22:42:01 | 24.240 | 4/19/2011 19:44:01 | 26.047 |
| 4/23/2011 23:12:01 | 24.177 | 4/19/2011 20:14:01 | 26.047 |
| 4/23/2011 23:42:01 | 23.990 | 4/19/2011 20:44:01 | 26.047 |
| 4/24/2011 00:12:01 | 23.740 | 4/19/2011 21:14:01 | 26.047 |
| 4/24/2011 00:42:01 | 23.740 | 4/19/2011 21:44:01 | 26.047 |
| 4/24/2011 01:12:01 | 23.677 | 4/19/2011 22:14:01 | 26.047 |
| 4/24/2011 01:42:01 | 23.615 | 4/19/2011 22:44:01 | 25.984 |
| 4/24/2011 02:12:01 | 23.365 | 4/19/2011 23:14:01 | 25.984 |
| 4/24/2011 02:42:01 | 23.052 | 4/19/2011 23:44:01 | 25.984 |
| 4/24/2011 03:12:01 | 22.802 | 4/20/2011 00:14:01 | 25.922 |
| 4/24/2011 03:42:01 | 22.864 | 4/20/2011 00:44:01 | 25.922 |
| 4/24/2011 04:12:01 | 22.927 | 4/20/2011 01:14:01 | 25.922 |
| 4/24/2011 04:42:01 | 22.739 | 4/20/2011 01:44:01 | 25.922 |
| 4/24/2011 05:12:01 | 22.489 | 4/20/2011 02:14:01 | 25.922 |
| 4/24/2011 05:42:01 | 22.739 | 4/20/2011 02:44:01 | 25.859 |
| 4/24/2011 06:12:01 | 22.864 | 4/20/2011 03:14:01 | 25.859 |
| 4/24/2011 06:42:01 | 23.240 | 4/20/2011 03:44:01 | 25.859 |
| 4/24/2011 07:12:01 | 23.990 | 4/20/2011 04:14:01 | 25.797 |
| 4/24/2011 07:42:01 | 25.052 | 4/20/2011 04:44:01 | 25.797 |
| 4/24/2011 08:12:01 | 25.677 | 4/20/2011 05:14:01 | 25.797 |
| 4/24/2011 08:42:01 | 27.489 | 4/20/2011 05:44:01 | 25.797 |
| 4/24/2011 09:12:01 | 28.551 | 4/20/2011 06:14:01 | 25.734 |
| 4/24/2011 09:42:01 | 29.238 | 4/20/2011 06:44:01 | 25.734 |
| 4/24/2011 10:12:01 | 28.489 | 4/20/2011 07:14:01 | 25.734 |
| 4/24/2011 10:42:01 | 30.425 | 4/20/2011 07:44:01 | 25.672 |
| 4/24/2011 11:12:01 | 31.111 | 4/20/2011 08:14:01 | 25.672 |
| 4/24/2011 11:42:01 | 31.735 | 4/20/2011 08:44:01 | 25.672 |
| 4/24/2011 12:12:01 | 29.426 | 4/20/2011 09:14:01 | 25.672 |
| 4/24/2011 12:42:01 | 30.924 | 4/20/2011 09:44:01 | 25.672 |
| 4/24/2011 13:12:01 | 31.798 | 4/20/2011 10:14:01 | 25.609 |
| 4/24/2011 13:42:01 | 32.235 | 4/20/2011 10:44:01 | 25.672 |
| 4/24/2011 14:12:01 | 32.172 | 4/20/2011 11:14:01 | 25.672 |
| 4/24/2011 14:42:01 | 32.609 | 4/20/2011 11:44:01 | 25.672 |
| 4/24/2011 15:12:01 | 31.236 | 4/20/2011 12:14:01 | 25.672 |
| 4/24/2011 15:42:01 | 29.988 | 4/20/2011 12:44:01 | 25.734 |
| 4/24/2011 16:12:01 | 28.864 | 4/20/2011 13:14:01 | 25.797 |
| 4/24/2011 16:42:01 | 27.489 | 4/20/2011 13:44:01 | 25.797 |
| 4/24/2011 17:12:01 | 26.615 | 4/20/2011 14:14:01 | 25.797 |
| 4/24/2011 17:42:01 | 25.802 | 4/20/2011 14:44:01 | 25.859 |
| 4/24/2011 18:12:01 | 25.115 | 4/20/2011 15:14:01 | 25.859 |
| 4/24/2011 18:42:01 | 25.303 | 4/20/2011 15:44:01 | 25.922 |
| 4/24/2011 19:12:01 | 25.240 | 4/20/2011 16:14:01 | 25.922 |
| 4/24/2011 19:42:01 | 24.865 | 4/20/2011 16:44:01 | 25.922 |
| 4/24/2011 20:12:01 | 24.740 | 4/20/2011 17:14:01 | 25.984 |
| 4/24/2011 20:42:01 | 24.615 | 4/20/2011 17:44:01 | 25.984 |
| 4/24/2011 21:12:01 | 24.552 | 4/20/2011 18:14:01 | 25.984 |
| 4/24/2011 21:42:01 | 24.490 | 4/20/2011 18:44:01 | 25.984 |
| 4/24/2011 22:12:01 | 24.365 | 4/20/2011 19:14:01 | 25.984 |
| 4/24/2011 22:42:01 | 24.240 | 4/20/2011 19:44:01 | 26.047 |
| 4/24/2011 23:12:01 | 23.990 | 4/20/2011 20:14:01 | 26.047 |



|                    |        |                    |        |
|--------------------|--------|--------------------|--------|
| 4/24/2011 23:42:01 | 23.615 | 4/20/2011 20:44:01 | 26.047 |
| 4/25/2011 00:12:01 | 23.427 | 4/20/2011 21:14:01 | 26.047 |
| 4/25/2011 00:42:01 | 23.365 | 4/20/2011 21:44:01 | 26.047 |
| 4/25/2011 01:12:01 | 23.177 | 4/20/2011 22:14:01 | 26.047 |
| 4/25/2011 01:42:01 | 23.177 | 4/20/2011 22:44:01 | 25.984 |
| 4/25/2011 02:12:01 | 23.052 | 4/20/2011 23:14:01 | 25.984 |
| 4/25/2011 02:42:01 | 22.802 | 4/20/2011 23:44:01 | 25.984 |
| 4/25/2011 03:12:01 | 22.614 | 4/21/2011 00:14:01 | 25.922 |
| 4/25/2011 03:42:01 | 22.489 | 4/21/2011 00:44:01 | 25.922 |
| 4/25/2011 04:12:01 | 22.239 | 4/21/2011 01:14:01 | 25.922 |
| 4/25/2011 04:42:01 | 21.989 | 4/21/2011 01:44:01 | 25.922 |
| 4/25/2011 05:12:01 | 21.864 | 4/21/2011 02:14:01 | 25.922 |
| 4/25/2011 05:42:01 | 21.801 | 4/21/2011 02:44:01 | 25.859 |
| 4/25/2011 06:12:01 | 21.801 | 4/21/2011 03:14:01 | 25.859 |
| 4/25/2011 06:42:01 | 22.239 | 4/21/2011 03:44:01 | 25.859 |
| 4/25/2011 07:12:01 | 23.552 | 4/21/2011 04:14:01 | 25.859 |
| 4/25/2011 07:42:01 | 24.427 | 4/21/2011 04:44:01 | 25.797 |
| 4/25/2011 08:12:01 | 25.865 | 4/21/2011 05:14:01 | 25.797 |
| 4/25/2011 08:42:01 | 26.927 | 4/21/2011 05:44:01 | 25.797 |
| 4/25/2011 09:12:01 | 27.927 | 4/21/2011 06:14:01 | 25.797 |
| 4/25/2011 09:42:01 | 28.614 | 4/21/2011 06:44:01 | 25.734 |
| 4/25/2011 10:12:01 | 28.989 | 4/21/2011 07:14:01 | 25.734 |
| 4/25/2011 10:42:01 | 28.239 | 4/21/2011 07:44:01 | 25.734 |
| 4/25/2011 11:12:01 | 27.739 | 4/21/2011 08:14:01 | 25.672 |
| 4/25/2011 11:42:01 | 28.426 | 4/21/2011 08:44:01 | 25.672 |
| 4/25/2011 12:12:01 | 27.989 | 4/21/2011 09:14:01 | 25.672 |
| 4/25/2011 12:42:01 | 29.113 | 4/21/2011 09:44:01 | 25.672 |
| 4/25/2011 13:12:01 | 30.050 | 4/21/2011 10:14:01 | 25.672 |
| 4/25/2011 13:42:01 | 31.361 | 4/21/2011 10:44:01 | 25.609 |
| 4/25/2011 14:12:01 | 31.673 | 4/21/2011 11:14:01 | 25.672 |
| 4/25/2011 14:42:01 | 31.985 | 4/21/2011 11:44:01 | 25.672 |
| 4/25/2011 15:12:01 | 30.986 | 4/21/2011 12:14:01 | 25.672 |
| 4/25/2011 15:42:01 | 30.050 | 4/21/2011 12:44:01 | 25.672 |
| 4/25/2011 16:12:01 | 28.926 | 4/21/2011 13:14:01 | 25.672 |
| 4/25/2011 16:42:01 | 28.114 | 4/21/2011 13:44:01 | 25.734 |
| 4/25/2011 17:12:01 | 27.427 | 4/21/2011 14:14:01 | 25.734 |
| 4/25/2011 17:42:01 | 26.677 | 4/21/2011 14:44:01 | 25.734 |
| 4/25/2011 18:12:01 | 25.865 | 4/21/2011 15:14:01 | 25.734 |
| 4/25/2011 18:42:01 | 25.365 | 4/21/2011 15:44:01 | 25.797 |
| 4/25/2011 19:12:01 | 25.052 | 4/21/2011 16:14:01 | 25.797 |
| 4/25/2011 19:42:01 | 24.740 | 4/21/2011 16:44:01 | 25.797 |
| 4/25/2011 20:12:01 | 24.365 | 4/21/2011 17:14:01 | 25.859 |
| 4/25/2011 20:42:01 | 24.052 | 4/21/2011 17:44:01 | 25.859 |
| 4/25/2011 21:12:01 | 23.990 | 4/21/2011 18:14:01 | 25.859 |
| 4/25/2011 21:42:01 | 23.802 | 4/21/2011 18:44:01 | 25.859 |
| 4/25/2011 22:12:01 | 23.615 | 4/21/2011 19:14:01 | 25.859 |
| 4/25/2011 22:42:01 | 23.365 | 4/21/2011 19:44:01 | 25.922 |
| 4/25/2011 23:12:01 | 23.114 | 4/21/2011 20:14:01 | 25.922 |
| 4/25/2011 23:42:01 | 22.989 | 4/21/2011 20:44:01 | 25.922 |
| 4/26/2011 00:12:01 | 22.739 | 4/21/2011 21:14:01 | 25.922 |

|                    |        |                    |        |
|--------------------|--------|--------------------|--------|
| 4/26/2011 00:42:01 | 22.489 | 4/21/2011 21:44:01 | 25.859 |
| 4/26/2011 01:12:01 | 22.427 | 4/21/2011 22:14:01 | 25.859 |
| 4/26/2011 01:42:01 | 22.302 | 4/21/2011 22:44:01 | 25.859 |
| 4/26/2011 02:12:01 | 22.364 | 4/21/2011 23:14:01 | 25.859 |
| 4/26/2011 02:42:01 | 22.051 | 4/21/2011 23:44:01 | 25.797 |
| 4/26/2011 03:12:01 | 21.801 | 4/22/2011 00:14:01 | 25.797 |
| 4/26/2011 03:42:01 | 21.739 | 4/22/2011 00:44:01 | 25.797 |
| 4/26/2011 04:12:01 | 21.739 | 4/22/2011 01:14:01 | 25.734 |
| 4/26/2011 04:42:01 | 21.488 | 4/22/2011 01:44:01 | 25.734 |
| 4/26/2011 05:12:01 | 21.551 | 4/22/2011 02:14:01 | 25.672 |
| 4/26/2011 05:42:01 | 21.614 | 4/22/2011 02:44:01 | 25.672 |
| 4/26/2011 06:12:01 | 21.426 | 4/22/2011 03:14:01 | 25.672 |
| 4/26/2011 06:42:01 | 21.551 | 4/22/2011 03:44:01 | 25.609 |
| 4/26/2011 07:12:01 | 22.176 | 4/22/2011 04:14:01 | 25.609 |
| 4/26/2011 07:42:01 | 23.365 | 4/22/2011 04:44:01 | 25.609 |
| 4/26/2011 08:12:01 | 24.927 | 4/22/2011 05:14:01 | 25.547 |
| 4/26/2011 08:42:01 | 26.427 | 4/22/2011 05:44:01 | 25.547 |
| 4/26/2011 09:12:01 | 27.739 | 4/22/2011 06:14:01 | 25.547 |
| 4/26/2011 09:42:01 | 28.614 | 4/22/2011 06:44:01 | 25.484 |
| 4/26/2011 10:12:01 | 29.488 | 4/22/2011 07:14:01 | 25.484 |
| 4/26/2011 10:42:01 | 30.674 | 4/22/2011 07:44:01 | 25.484 |
| 4/26/2011 11:12:01 | 31.611 | 4/22/2011 08:14:01 | 25.484 |
| 4/26/2011 11:42:01 | 32.048 | 4/22/2011 08:44:01 | 25.422 |
| 4/26/2011 12:12:01 | 32.422 | 4/22/2011 09:14:01 | 25.422 |
| 4/26/2011 12:42:01 | 32.547 | 4/22/2011 09:44:01 | 25.422 |
| 4/26/2011 13:12:01 | 32.672 | 4/22/2011 10:14:01 | 25.422 |
| 4/26/2011 13:42:01 | 33.046 | 4/22/2011 10:44:01 | 25.422 |
| 4/26/2011 14:12:01 | 32.048 | 4/22/2011 11:14:01 | 25.422 |
| 4/26/2011 14:42:01 | 31.611 | 4/22/2011 11:44:01 | 25.422 |
| 4/26/2011 15:12:01 | 31.174 | 4/22/2011 12:14:01 | 25.484 |
| 4/26/2011 15:42:01 | 30.112 | 4/22/2011 12:44:01 | 25.484 |
| 4/26/2011 16:12:01 | 28.864 | 4/22/2011 13:14:01 | 25.547 |
| 4/26/2011 16:42:01 | 27.739 | 4/22/2011 13:44:01 | 25.547 |
| 4/26/2011 17:12:01 | 26.990 | 4/22/2011 14:14:01 | 25.609 |
| 4/26/2011 17:42:01 | 26.240 | 4/22/2011 14:44:01 | 25.609 |
| 4/26/2011 18:12:01 | 25.677 | 4/22/2011 15:14:01 | 25.672 |
| 4/26/2011 18:42:01 | 25.052 | 4/22/2011 15:44:01 | 25.672 |
| 4/26/2011 19:12:01 | 24.552 | 4/22/2011 16:14:01 | 25.734 |
| 4/26/2011 19:42:01 | 24.115 | 4/22/2011 16:44:01 | 25.734 |
| 4/26/2011 20:12:01 | 23.927 | 4/22/2011 17:14:01 | 25.797 |
| 4/26/2011 20:42:01 | 23.740 | 4/22/2011 17:44:01 | 25.797 |
| 4/26/2011 21:12:01 | 23.615 | 4/22/2011 18:14:01 | 25.797 |
| 4/26/2011 21:42:01 | 23.240 | 4/22/2011 18:44:01 | 25.859 |
| 4/26/2011 22:12:01 | 22.989 | 4/22/2011 19:14:01 | 25.859 |
| 4/26/2011 22:42:01 | 22.802 | 4/22/2011 19:44:01 | 25.859 |
| 4/26/2011 23:12:01 | 22.614 | 4/22/2011 20:14:01 | 25.922 |
| 4/26/2011 23:42:01 | 22.489 | 4/22/2011 20:44:01 | 25.922 |
| 4/27/2011 00:12:01 | 22.427 | 4/22/2011 21:14:01 | 25.922 |
| 4/27/2011 00:42:01 | 22.302 | 4/22/2011 21:44:01 | 25.922 |
| 4/27/2011 01:12:01 | 21.989 | 4/22/2011 22:14:01 | 25.922 |

|                    |        |                    |        |
|--------------------|--------|--------------------|--------|
| 4/27/2011 01:42:01 | 21.864 | 4/22/2011 22:44:01 | 25.922 |
| 4/27/2011 02:12:01 | 21.614 | 4/22/2011 23:14:01 | 25.859 |
| 4/27/2011 02:42:01 | 21.363 | 4/22/2011 23:44:01 | 25.859 |
| 4/27/2011 03:12:01 | 21.176 | 4/23/2011 00:14:01 | 25.859 |
| 4/27/2011 03:42:01 | 20.925 | 4/23/2011 00:44:01 | 25.859 |
| 4/27/2011 04:12:01 | 20.800 | 4/23/2011 01:14:01 | 25.859 |
| 4/27/2011 04:42:01 | 20.738 | 4/23/2011 01:44:01 | 25.797 |
| 4/27/2011 05:12:01 | 20.550 | 4/23/2011 02:14:01 | 25.797 |
| 4/27/2011 05:42:01 | 20.425 | 4/23/2011 02:44:01 | 25.797 |
| 4/27/2011 06:12:01 | 20.738 | 4/23/2011 03:14:01 | 25.797 |
| 4/27/2011 06:42:01 | 20.800 | 4/23/2011 03:44:01 | 25.734 |
| 4/27/2011 07:12:01 | 21.676 | 4/23/2011 04:14:01 | 25.734 |
| 4/27/2011 07:42:01 | 22.927 | 4/23/2011 04:44:01 | 25.734 |
| 4/27/2011 08:12:01 | 24.677 | 4/23/2011 05:14:01 | 25.734 |
| 4/27/2011 08:42:01 | 26.365 | 4/23/2011 05:44:01 | 25.672 |
| 4/27/2011 09:12:01 | 27.552 | 4/23/2011 06:14:01 | 25.672 |
| 4/27/2011 09:42:01 | 28.614 | 4/23/2011 06:44:01 | 25.672 |
| 4/27/2011 10:12:01 | 29.488 | 4/23/2011 07:14:01 | 25.672 |
| 4/27/2011 10:42:01 | 30.799 | 4/23/2011 07:44:01 | 25.609 |
| 4/27/2011 11:12:01 | 32.235 | 4/23/2011 08:14:01 | 25.609 |
| 4/27/2011 11:42:01 | 32.609 | 4/23/2011 08:44:01 | 25.609 |
| 4/27/2011 12:12:01 | 32.110 | 4/23/2011 09:14:01 | 25.547 |
| 4/27/2011 12:42:01 | 31.611 | 4/23/2011 09:44:01 | 25.547 |
| 4/27/2011 13:12:01 | 29.925 | 4/23/2011 10:14:01 | 25.547 |
| 4/27/2011 13:42:01 | 32.672 | 4/23/2011 10:44:01 | 25.547 |
| 4/27/2011 14:12:01 | 33.046 | 4/23/2011 11:14:01 | 25.547 |
| 4/27/2011 14:42:01 | 32.422 | 4/23/2011 11:44:01 | 25.609 |
| 4/27/2011 15:12:01 | 30.362 | 4/23/2011 12:14:01 | 25.609 |
| 4/27/2011 15:42:01 | 29.551 | 4/23/2011 12:44:01 | 25.609 |
| 4/27/2011 16:12:01 | 28.489 | 4/23/2011 13:14:01 | 25.672 |
| 4/27/2011 16:42:01 | 27.927 | 4/23/2011 13:44:01 | 25.672 |
| 4/27/2011 17:12:01 | 27.115 | 4/23/2011 14:14:01 | 25.734 |
| 4/27/2011 17:42:01 | 26.552 | 4/23/2011 14:44:01 | 25.734 |
| 4/27/2011 18:12:01 | 25.802 | 4/23/2011 15:14:01 | 25.797 |
| 4/27/2011 18:42:01 | 25.178 | 4/23/2011 15:44:01 | 25.797 |
| 4/27/2011 19:12:01 | 24.490 | 4/23/2011 16:14:01 | 25.797 |
| 4/27/2011 19:42:01 | 23.927 | 4/23/2011 16:44:01 | 25.859 |
| 4/27/2011 20:12:01 | 23.427 | 4/23/2011 17:14:01 | 25.859 |
| 4/27/2011 20:42:01 | 23.114 | 4/23/2011 17:44:01 | 25.859 |
| 4/27/2011 21:12:01 | 22.989 | 4/23/2011 18:14:01 | 25.922 |
| 4/27/2011 21:42:01 | 22.739 | 4/23/2011 18:44:01 | 25.922 |
| 4/27/2011 22:12:01 | 22.552 | 4/23/2011 19:14:01 | 25.922 |
| 4/27/2011 22:42:01 | 22.427 | 4/23/2011 19:44:01 | 25.922 |
| 4/27/2011 23:12:01 | 22.176 | 4/23/2011 20:14:01 | 25.922 |
| 4/27/2011 23:42:01 | 21.926 | 4/23/2011 20:44:01 | 25.922 |
| 4/28/2011 00:12:01 | 21.614 | 4/23/2011 21:14:01 | 25.984 |
| 4/28/2011 00:42:01 | 21.426 | 4/23/2011 21:44:01 | 25.984 |
| 4/28/2011 01:12:01 | 21.238 | 4/23/2011 22:14:01 | 25.984 |
| 4/28/2011 01:42:01 | 21.051 | 4/23/2011 22:44:01 | 25.984 |
| 4/28/2011 02:12:01 | 21.113 | 4/23/2011 23:14:01 | 25.984 |

|                    |        |                    |        |
|--------------------|--------|--------------------|--------|
| 4/28/2011 02:42:01 | 21.363 | 4/23/2011 23:44:01 | 25.984 |
| 4/28/2011 03:12:01 | 21.488 | 4/24/2011 00:14:01 | 25.922 |
| 4/28/2011 03:42:01 | 21.488 | 4/24/2011 00:44:01 | 25.922 |
| 4/28/2011 04:12:01 | 21.238 | 4/24/2011 01:14:01 | 25.922 |
| 4/28/2011 04:42:01 | 21.051 | 4/24/2011 01:44:01 | 25.922 |
| 4/28/2011 05:12:01 | 21.113 | 4/24/2011 02:14:01 | 25.922 |
| 4/28/2011 05:42:01 | 21.363 | 4/24/2011 02:44:01 | 25.922 |
| 4/28/2011 06:12:01 | 21.238 | 4/24/2011 03:14:01 | 25.922 |
| 4/28/2011 06:42:01 | 21.176 | 4/24/2011 03:44:01 | 25.859 |
| 4/28/2011 07:12:01 | 22.114 | 4/24/2011 04:14:01 | 25.859 |
| 4/28/2011 07:42:01 | 23.240 | 4/24/2011 04:44:01 | 25.859 |
| 4/28/2011 08:12:01 | 24.615 | 4/24/2011 05:14:01 | 25.859 |
| 4/28/2011 08:42:01 | 26.177 | 4/24/2011 05:44:01 | 25.797 |
| 4/28/2011 09:12:01 | 27.677 | 4/24/2011 06:14:01 | 25.797 |
| 4/28/2011 09:42:01 | 28.614 | 4/24/2011 06:44:01 | 25.797 |
| 4/28/2011 10:12:01 | 29.613 | 4/24/2011 07:14:01 | 25.734 |
| 4/28/2011 10:42:01 | 29.613 | 4/24/2011 07:44:01 | 25.734 |
| 4/28/2011 11:12:01 | 29.675 | 4/24/2011 08:14:01 | 25.734 |
| 4/28/2011 11:42:01 | 30.799 | 4/24/2011 08:44:01 | 25.734 |
| 4/28/2011 12:12:01 | 30.487 | 4/24/2011 09:14:01 | 25.672 |
| 4/28/2011 12:42:01 | 28.739 | 4/24/2011 09:44:01 | 25.672 |
| 4/28/2011 13:12:01 | 31.548 | 4/24/2011 10:14:01 | 25.672 |
| 4/28/2011 13:42:01 | 32.172 | 4/24/2011 10:44:01 | 25.672 |
| 4/28/2011 14:12:01 | 31.174 | 4/24/2011 11:14:01 | 25.734 |
| 4/28/2011 14:42:01 | 31.486 | 4/24/2011 11:44:01 | 25.734 |
| 4/28/2011 15:12:01 | 30.737 | 4/24/2011 12:14:01 | 25.734 |
| 4/28/2011 15:42:01 | 29.800 | 4/24/2011 12:44:01 | 25.797 |
| 4/28/2011 16:12:01 | 28.926 | 4/24/2011 13:14:01 | 25.797 |
| 4/28/2011 16:42:01 | 27.927 | 4/24/2011 13:44:01 | 25.859 |
| 4/28/2011 17:12:01 | 27.302 | 4/24/2011 14:14:01 | 25.859 |
| 4/28/2011 17:42:01 | 26.677 | 4/24/2011 14:44:01 | 25.922 |
| 4/28/2011 18:12:01 | 26.052 | 4/24/2011 15:14:01 | 25.922 |
| 4/28/2011 18:42:01 | 25.365 | 4/24/2011 15:44:01 | 25.922 |
| 4/28/2011 19:12:01 | 24.990 | 4/24/2011 16:14:01 | 25.984 |
| 4/28/2011 19:42:01 | 24.490 | 4/24/2011 16:44:01 | 25.984 |
| 4/28/2011 20:12:01 | 24.240 | 4/24/2011 17:14:01 | 25.984 |
| 4/28/2011 20:42:01 | 24.177 | 4/24/2011 17:44:01 | 25.984 |
| 4/28/2011 21:12:01 | 24.052 | 4/24/2011 18:14:01 | 26.047 |
| 4/28/2011 21:42:01 | 23.927 | 4/24/2011 18:44:01 | 26.047 |
| 4/28/2011 22:12:01 | 23.927 | 4/24/2011 19:14:01 | 26.047 |
| 4/28/2011 22:42:01 | 23.740 | 4/24/2011 19:44:01 | 26.047 |
| 4/28/2011 23:12:01 | 24.115 | 4/24/2011 20:14:01 | 26.047 |
| 4/28/2011 23:42:01 | 24.552 | 4/24/2011 20:44:01 | 26.047 |
| 4/29/2011 00:12:01 | 24.552 | 4/24/2011 21:14:01 | 26.047 |
| 4/29/2011 00:42:01 | 24.427 | 4/24/2011 21:44:01 | 26.047 |
| 4/29/2011 01:12:01 | 23.552 | 4/24/2011 22:14:01 | 26.047 |
| 4/29/2011 01:42:01 | 22.364 | 4/24/2011 22:44:01 | 26.047 |
| 4/29/2011 02:12:01 | 22.239 | 4/24/2011 23:14:01 | 26.047 |
| 4/29/2011 02:42:01 | 22.176 | 4/24/2011 23:44:01 | 25.984 |
| 4/29/2011 03:12:01 | 21.926 | 4/25/2011 00:14:01 | 25.984 |

|                    |        |                    |        |
|--------------------|--------|--------------------|--------|
| 4/29/2011 03:42:01 | 21.801 | 4/25/2011 00:44:01 | 25.984 |
| 4/29/2011 04:12:01 | 21.551 | 4/25/2011 01:14:01 | 25.984 |
| 4/29/2011 04:42:01 | 21.363 | 4/25/2011 01:44:01 | 25.984 |
| 4/29/2011 05:12:01 | 21.301 | 4/25/2011 02:14:01 | 25.984 |
| 4/29/2011 05:42:01 | 21.113 | 4/25/2011 02:44:01 | 25.922 |
| 4/29/2011 06:12:01 | 20.863 | 4/25/2011 03:14:01 | 25.922 |
| 4/29/2011 06:42:01 | 20.988 | 4/25/2011 03:44:01 | 25.922 |
| 4/29/2011 07:12:01 | 21.739 | 4/25/2011 04:14:01 | 25.859 |
| 4/29/2011 07:42:01 | 22.802 | 4/25/2011 04:44:01 | 25.859 |
| 4/29/2011 08:12:01 | 23.865 | 4/25/2011 05:14:01 | 25.859 |
| 4/29/2011 08:42:01 | 24.740 | 4/25/2011 05:44:01 | 25.797 |
| 4/29/2011 09:12:01 | 25.740 | 4/25/2011 06:14:01 | 25.797 |
| 4/29/2011 09:42:01 | 26.302 | 4/25/2011 06:44:01 | 25.797 |
| 4/29/2011 10:12:01 | 27.052 | 4/25/2011 07:14:01 | 25.734 |
| 4/29/2011 10:42:01 | 28.177 | 4/25/2011 07:44:01 | 25.734 |
| 4/29/2011 11:12:01 | 28.926 | 4/25/2011 08:14:01 | 25.734 |
| 4/29/2011 11:42:01 | 29.675 | 4/25/2011 08:44:01 | 25.672 |
| 4/29/2011 12:12:01 | 30.549 | 4/25/2011 09:14:01 | 25.672 |
| 4/29/2011 12:42:01 | 30.862 | 4/25/2011 09:44:01 | 25.672 |
| 4/29/2011 13:12:01 | 31.049 | 4/25/2011 10:14:01 | 25.672 |
| 4/29/2011 13:42:01 | 31.299 | 4/25/2011 10:44:01 | 25.672 |
| 4/29/2011 14:12:01 | 30.986 | 4/25/2011 11:14:01 | 25.672 |
| 4/29/2011 14:42:01 | 30.612 | 4/25/2011 11:44:01 | 25.672 |
| 4/29/2011 15:12:01 | 29.675 | 4/25/2011 12:14:01 | 25.734 |
| 4/29/2011 15:42:01 | 28.551 | 4/25/2011 12:44:01 | 25.734 |
| 4/29/2011 16:12:01 | 27.802 | 4/25/2011 13:14:01 | 25.734 |
| 4/29/2011 16:42:01 | 27.115 | 4/25/2011 13:44:01 | 25.734 |
| 4/29/2011 17:12:01 | 26.302 | 4/25/2011 14:14:01 | 25.797 |
| 4/29/2011 17:42:01 | 25.552 | 4/25/2011 14:44:01 | 25.797 |
| 4/29/2011 18:12:01 | 24.552 | 4/25/2011 15:14:01 | 25.797 |
| 4/29/2011 18:42:01 | 23.990 | 4/25/2011 15:44:01 | 25.859 |
| 4/29/2011 19:12:01 | 23.427 | 4/25/2011 16:14:01 | 25.859 |
| 4/29/2011 19:42:01 | 22.927 | 4/25/2011 16:44:01 | 25.859 |
| 4/29/2011 20:12:01 | 22.552 | 4/25/2011 17:14:01 | 25.922 |
| 4/29/2011 20:42:01 | 22.302 | 4/25/2011 17:44:01 | 25.922 |
| 4/29/2011 21:12:01 | 22.176 | 4/25/2011 18:14:01 | 25.922 |
| 4/29/2011 21:42:01 | 21.989 | 4/25/2011 18:44:01 | 25.922 |
| 4/29/2011 22:12:01 | 21.801 | 4/25/2011 19:14:01 | 25.984 |
| 4/29/2011 22:42:01 | 21.801 | 4/25/2011 19:44:01 | 25.984 |
| 4/29/2011 23:12:01 | 21.926 | 4/25/2011 20:14:01 | 25.984 |
| 4/29/2011 23:42:01 | 21.801 | 4/25/2011 20:44:01 | 25.984 |
| 4/30/2011 00:12:01 | 21.676 | 4/25/2011 21:14:01 | 25.984 |
| 4/30/2011 00:42:01 | 21.801 | 4/25/2011 21:44:01 | 25.984 |
| 4/30/2011 01:12:01 | 21.676 | 4/25/2011 22:14:01 | 25.984 |
| 4/30/2011 01:42:01 | 21.488 | 4/25/2011 22:44:01 | 25.984 |
| 4/30/2011 02:12:01 | 21.363 | 4/25/2011 23:14:01 | 25.984 |
| 4/30/2011 02:42:01 | 21.176 | 4/25/2011 23:44:01 | 25.984 |
| 4/30/2011 03:12:01 | 21.051 | 4/26/2011 00:14:01 | 25.922 |
| 4/30/2011 03:42:01 | 20.925 | 4/26/2011 00:44:01 | 25.922 |
| 4/30/2011 04:12:01 | 20.800 | 4/26/2011 01:14:01 | 25.922 |

|                    |        |                    |        |
|--------------------|--------|--------------------|--------|
| 4/30/2011 04:42:01 | 20.738 | 4/26/2011 01:44:01 | 25.922 |
| 4/30/2011 05:12:01 | 20.675 | 4/26/2011 02:14:01 | 25.859 |
| 4/30/2011 05:42:01 | 20.425 | 4/26/2011 02:44:01 | 25.859 |
| 4/30/2011 06:12:01 | 20.237 | 4/26/2011 03:14:01 | 25.859 |
| 4/30/2011 06:42:01 | 20.237 | 4/26/2011 03:44:01 | 25.797 |
| 4/30/2011 07:12:01 | 21.051 | 4/26/2011 04:14:01 | 25.797 |
| 4/30/2011 07:42:01 | 22.427 | 4/26/2011 04:44:01 | 25.797 |
| 4/30/2011 08:12:01 | 23.927 | 4/26/2011 05:14:01 | 25.734 |
| 4/30/2011 08:42:01 | 25.552 | 4/26/2011 05:44:01 | 25.734 |
| 4/30/2011 09:12:01 | 26.740 | 4/26/2011 06:14:01 | 25.672 |
| 4/30/2011 09:42:01 | 27.614 | 4/26/2011 06:44:01 | 25.672 |
| 4/30/2011 10:12:01 | 28.426 | 4/26/2011 07:14:01 | 25.672 |
| 4/30/2011 10:42:01 | 29.363 | 4/26/2011 07:44:01 | 25.609 |
| 4/30/2011 11:12:01 | 29.925 | 4/26/2011 08:14:01 | 25.609 |
| 4/30/2011 11:42:01 | 30.549 | 4/26/2011 08:44:01 | 25.547 |
| 4/30/2011 12:12:01 | 31.111 | 4/26/2011 09:14:01 | 25.547 |
| 4/30/2011 12:42:01 | 31.299 | 4/26/2011 09:44:01 | 25.547 |
| 4/30/2011 13:12:01 | 31.423 | 4/26/2011 10:14:01 | 25.547 |
| 4/30/2011 13:42:01 | 31.923 | 4/26/2011 10:44:01 | 25.547 |
| 4/30/2011 14:12:01 | 31.611 | 4/26/2011 11:14:01 | 25.547 |
| 4/30/2011 14:42:01 | 31.111 | 4/26/2011 11:44:01 | 25.547 |
| 4/30/2011 15:12:01 | 29.863 | 4/26/2011 12:14:01 | 25.547 |
| 4/30/2011 15:42:01 | 28.864 | 4/26/2011 12:44:01 | 25.609 |
| 4/30/2011 16:12:01 | 27.864 | 4/26/2011 13:14:01 | 25.609 |
| 4/30/2011 16:42:01 | 27.115 | 4/26/2011 13:44:01 | 25.672 |
| 4/30/2011 17:12:01 | 26.427 | 4/26/2011 14:14:01 | 25.672 |
| 4/30/2011 17:42:01 | 25.677 | 4/26/2011 14:44:01 | 25.734 |
| 4/30/2011 18:12:01 | 24.865 | 4/26/2011 15:14:01 | 25.734 |
| 4/30/2011 18:42:01 | 24.177 | 4/26/2011 15:44:01 | 25.797 |
| 4/30/2011 19:12:01 | 23.490 | 4/26/2011 16:14:01 | 25.797 |
| 4/30/2011 19:42:01 | 23.052 | 4/26/2011 16:44:01 | 25.797 |
| 4/30/2011 20:12:01 | 22.739 | 4/26/2011 17:14:01 | 25.859 |
| 4/30/2011 20:42:01 | 22.489 | 4/26/2011 17:44:01 | 25.859 |
| 4/30/2011 21:12:01 | 22.302 | 4/26/2011 18:14:01 | 25.859 |
| 4/30/2011 21:42:01 | 22.176 | 4/26/2011 18:44:01 | 25.922 |
| 4/30/2011 22:12:01 | 22.239 | 4/26/2011 19:14:01 | 25.922 |
| 4/30/2011 22:42:01 | 22.239 | 4/26/2011 19:44:01 | 25.922 |
| 4/30/2011 23:12:01 | 22.176 | 4/26/2011 20:14:01 | 25.922 |
| 4/30/2011 23:42:01 | 22.677 | 4/26/2011 20:44:01 | 25.922 |
| 5/1/2011 00:12:01  | 22.739 | 4/26/2011 21:14:01 | 25.922 |
| 5/1/2011 00:42:01  | 22.802 | 4/26/2011 21:44:01 | 25.922 |
| 5/1/2011 01:12:01  | 22.989 | 4/26/2011 22:14:01 | 25.922 |
| 5/1/2011 01:42:01  | 23.302 | 4/26/2011 22:44:01 | 25.922 |
| 5/1/2011 02:12:01  | 23.490 | 4/26/2011 23:14:01 | 25.859 |
| 5/1/2011 02:42:01  | 23.490 | 4/26/2011 23:44:01 | 25.859 |
| 5/1/2011 03:12:01  | 23.427 | 4/27/2011 00:14:01 | 25.859 |
| 5/1/2011 03:42:01  | 23.365 | 4/27/2011 00:44:01 | 25.859 |
| 5/1/2011 04:12:01  | 23.365 | 4/27/2011 01:14:01 | 25.797 |
| 5/1/2011 04:42:01  | 23.302 | 4/27/2011 01:44:01 | 25.797 |
| 5/1/2011 05:12:01  | 23.302 | 4/27/2011 02:14:01 | 25.797 |

|                   |        |                    |        |
|-------------------|--------|--------------------|--------|
| 5/1/2011 05:42:01 | 23.177 | 4/27/2011 02:44:01 | 25.734 |
| 5/1/2011 06:12:01 | 22.927 | 4/27/2011 03:14:01 | 25.734 |
| 5/1/2011 06:42:01 | 23.052 | 4/27/2011 03:44:01 | 25.734 |
| 5/1/2011 07:12:01 | 23.365 | 4/27/2011 04:14:01 | 25.672 |
| 5/1/2011 07:42:01 | 24.177 | 4/27/2011 04:44:01 | 25.672 |
| 5/1/2011 08:12:01 | 25.052 | 4/27/2011 05:14:01 | 25.609 |
| 5/1/2011 08:42:01 | 25.865 | 4/27/2011 05:44:01 | 25.609 |
| 5/1/2011 09:12:01 | 26.240 | 4/27/2011 06:14:01 | 25.609 |
| 5/1/2011 09:42:01 | 26.677 | 4/27/2011 06:44:01 | 25.547 |
| 5/1/2011 10:12:01 | 27.427 | 4/27/2011 07:14:01 | 25.547 |
| 5/1/2011 10:42:01 | 28.489 | 4/27/2011 07:44:01 | 25.484 |
| 5/1/2011 11:12:01 | 29.113 | 4/27/2011 08:14:01 | 25.484 |
| 5/1/2011 11:42:01 | 29.613 | 4/27/2011 08:44:01 | 25.422 |
| 5/1/2011 12:12:01 | 30.362 | 4/27/2011 09:14:01 | 25.422 |
| 5/1/2011 12:42:01 | 30.549 | 4/27/2011 09:44:01 | 25.422 |
| 5/1/2011 13:12:01 | 30.799 | 4/27/2011 10:14:01 | 25.422 |
| 5/1/2011 13:42:01 | 30.487 | 4/27/2011 10:44:01 | 25.422 |
| 5/1/2011 14:12:01 | 30.487 | 4/27/2011 11:14:01 | 25.422 |
| 5/1/2011 14:42:01 | 29.988 | 4/27/2011 11:44:01 | 25.422 |
| 5/1/2011 15:12:01 | 28.614 | 4/27/2011 12:14:01 | 25.484 |
| 5/1/2011 15:42:01 | 27.739 | 4/27/2011 12:44:01 | 25.484 |
| 5/1/2011 16:12:01 | 27.302 | 4/27/2011 13:14:01 | 25.547 |
| 5/1/2011 16:42:01 | 26.615 | 4/27/2011 13:44:01 | 25.547 |
| 5/1/2011 17:12:01 | 26.427 | 4/27/2011 14:14:01 | 25.609 |
| 5/1/2011 17:42:01 | 25.740 | 4/27/2011 14:44:01 | 25.609 |
| 5/1/2011 18:12:01 | 24.990 | 4/27/2011 15:14:01 | 25.609 |
| 5/1/2011 18:42:01 | 24.365 | 4/27/2011 15:44:01 | 25.672 |
| 5/1/2011 19:12:01 | 23.990 | 4/27/2011 16:14:01 | 25.672 |
| 5/1/2011 19:42:01 | 23.677 | 4/27/2011 16:44:01 | 25.734 |
| 5/1/2011 20:12:01 | 23.615 | 4/27/2011 17:14:01 | 25.734 |
| 5/1/2011 20:42:01 | 23.865 | 4/27/2011 17:44:01 | 25.797 |
| 5/1/2011 21:12:01 | 23.865 | 4/27/2011 18:14:01 | 25.797 |
| 5/1/2011 21:42:01 | 23.990 | 4/27/2011 18:44:01 | 25.797 |
| 5/1/2011 22:12:01 | 24.115 | 4/27/2011 19:14:01 | 25.797 |
| 5/1/2011 22:42:01 | 23.990 | 4/27/2011 19:44:01 | 25.859 |
| 5/1/2011 23:12:01 | 23.927 | 4/27/2011 20:14:01 | 25.859 |
| 5/1/2011 23:42:01 | 23.802 | 4/27/2011 20:44:01 | 25.859 |
| 5/2/2011 00:12:01 | 23.927 | 4/27/2011 21:14:01 | 25.859 |
| 5/2/2011 00:42:01 | 23.927 | 4/27/2011 21:44:01 | 25.859 |
| 5/2/2011 01:12:01 | 23.802 | 4/27/2011 22:14:01 | 25.859 |
| 5/2/2011 01:42:01 | 23.552 | 4/27/2011 22:44:01 | 25.859 |
| 5/2/2011 02:12:01 | 23.177 | 4/27/2011 23:14:01 | 25.797 |
| 5/2/2011 02:42:01 | 22.989 | 4/27/2011 23:44:01 | 25.797 |
| 5/2/2011 03:12:01 | 23.240 | 4/28/2011 00:14:01 | 25.797 |
| 5/2/2011 03:42:01 | 23.052 | 4/28/2011 00:44:01 | 25.734 |
| 5/2/2011 04:12:01 | 22.927 | 4/28/2011 01:14:01 | 25.734 |
| 5/2/2011 04:42:01 | 23.240 | 4/28/2011 01:44:01 | 25.734 |
| 5/2/2011 05:12:01 | 22.989 | 4/28/2011 02:14:01 | 25.672 |
| 5/2/2011 05:42:01 | 22.552 | 4/28/2011 02:44:01 | 25.672 |
| 5/2/2011 06:12:01 | 22.302 | 4/28/2011 03:14:01 | 25.672 |

|                   |        |                    |        |
|-------------------|--------|--------------------|--------|
| 5/2/2011 06:42:01 | 22.176 | 4/28/2011 03:44:01 | 25.609 |
| 5/2/2011 07:12:01 | 22.677 | 4/28/2011 04:14:01 | 25.609 |
| 5/2/2011 07:42:01 | 23.615 | 4/28/2011 04:44:01 | 25.547 |
| 5/2/2011 08:12:01 | 24.302 | 4/28/2011 05:14:01 | 25.547 |
| 5/2/2011 08:42:01 | 25.490 | 4/28/2011 05:44:01 | 25.484 |
| 5/2/2011 09:12:01 | 26.802 | 4/28/2011 06:14:01 | 25.484 |
| 5/2/2011 09:42:01 | 27.614 | 4/28/2011 06:44:01 | 25.484 |
| 5/2/2011 10:12:01 | 28.801 | 4/28/2011 07:14:01 | 25.422 |
| 5/2/2011 10:42:01 | 29.675 | 4/28/2011 07:44:01 | 25.422 |
| 5/2/2011 11:12:01 | 30.362 | 4/28/2011 08:14:01 | 25.359 |
| 5/2/2011 11:42:01 | 30.112 | 4/28/2011 08:44:01 | 25.359 |
| 5/2/2011 12:12:01 | 29.925 | 4/28/2011 09:14:01 | 25.359 |
| 5/2/2011 12:42:01 | 30.549 | 4/28/2011 09:44:01 | 25.297 |
| 5/2/2011 13:12:01 | 30.612 | 4/28/2011 10:14:01 | 25.297 |
| 5/2/2011 13:42:01 | 30.799 | 4/28/2011 10:44:01 | 25.297 |
| 5/2/2011 14:12:01 | 30.425 | 4/28/2011 11:14:01 | 25.359 |
| 5/2/2011 14:42:01 | 29.800 | 4/28/2011 11:44:01 | 25.359 |
| 5/2/2011 15:12:01 | 28.864 | 4/28/2011 12:14:01 | 25.359 |
| 5/2/2011 15:42:01 | 27.739 | 4/28/2011 12:44:01 | 25.422 |
| 5/2/2011 16:12:01 | 27.177 | 4/28/2011 13:14:01 | 25.422 |
| 5/2/2011 16:42:01 | 26.052 | 4/28/2011 13:44:01 | 25.484 |
| 5/2/2011 17:12:01 | 25.677 | 4/28/2011 14:14:01 | 25.484 |
| 5/2/2011 17:42:01 | 24.802 | 4/28/2011 14:44:01 | 25.547 |
| 5/2/2011 18:12:01 | 23.802 | 4/28/2011 15:14:01 | 25.547 |
| 5/2/2011 18:42:01 | 23.240 | 4/28/2011 15:44:01 | 25.609 |
| 5/2/2011 19:12:01 | 22.677 | 4/28/2011 16:14:01 | 25.609 |
| 5/2/2011 19:42:01 | 22.302 | 4/28/2011 16:44:01 | 25.672 |
| 5/2/2011 20:12:01 | 22.114 | 4/28/2011 17:14:01 | 25.672 |
| 5/2/2011 20:42:01 | 22.427 | 4/28/2011 17:44:01 | 25.672 |
| 5/2/2011 21:12:01 | 22.677 | 4/28/2011 18:14:01 | 25.734 |
| 5/2/2011 21:42:01 | 22.677 | 4/28/2011 18:44:01 | 25.734 |
| 5/2/2011 22:12:01 | 23.114 | 4/28/2011 19:14:01 | 25.734 |
| 5/2/2011 22:42:01 | 23.490 | 4/28/2011 19:44:01 | 25.734 |
| 5/2/2011 23:12:01 | 23.490 | 4/28/2011 20:14:01 | 25.797 |
| 5/2/2011 23:42:01 | 23.302 | 4/28/2011 20:44:01 | 25.797 |
| 5/3/2011 00:12:01 | 22.989 | 4/28/2011 21:14:01 | 25.797 |
| 5/3/2011 00:42:01 | 22.677 | 4/28/2011 21:44:01 | 25.797 |
| 5/3/2011 01:12:01 | 22.552 | 4/28/2011 22:14:01 | 25.797 |
| 5/3/2011 01:42:01 | 22.427 | 4/28/2011 22:44:01 | 25.797 |
| 5/3/2011 02:12:01 | 22.114 | 4/28/2011 23:14:01 | 25.797 |
| 5/3/2011 02:42:01 | 21.864 | 4/28/2011 23:44:01 | 25.797 |
| 5/3/2011 03:12:01 | 21.676 | 4/29/2011 00:14:01 | 25.734 |
| 5/3/2011 03:42:01 | 22.051 | 4/29/2011 00:44:01 | 25.734 |
| 5/3/2011 04:12:01 | 22.552 | 4/29/2011 01:14:01 | 25.734 |
| 5/3/2011 04:42:01 | 22.677 | 4/29/2011 01:44:01 | 25.734 |
| 5/3/2011 05:12:01 | 22.802 | 4/29/2011 02:14:01 | 25.734 |
| 5/3/2011 05:42:01 | 22.176 | 4/29/2011 02:44:01 | 25.734 |
| 5/3/2011 06:12:01 | 21.426 | 4/29/2011 03:14:01 | 25.734 |
| 5/3/2011 06:42:01 | 21.301 | 4/29/2011 03:44:01 | 25.672 |
| 5/3/2011 07:12:01 | 22.051 | 4/29/2011 04:14:01 | 25.672 |



|                   |        |                    |        |
|-------------------|--------|--------------------|--------|
| 5/3/2011 07:42:01 | 22.927 | 4/29/2011 04:44:01 | 25.672 |
| 5/3/2011 08:12:01 | 23.865 | 4/29/2011 05:14:01 | 25.609 |
| 5/3/2011 08:42:01 | 24.990 | 4/29/2011 05:44:01 | 25.609 |
| 5/3/2011 09:12:01 | 25.990 | 4/29/2011 06:14:01 | 25.609 |
| 5/3/2011 09:42:01 | 26.490 | 4/29/2011 06:44:01 | 25.547 |
| 5/3/2011 10:12:01 | 27.365 | 4/29/2011 07:14:01 | 25.547 |
| 5/3/2011 10:42:01 | 28.364 | 4/29/2011 07:44:01 | 25.484 |
| 5/3/2011 11:12:01 | 29.613 | 4/29/2011 08:14:01 | 25.484 |
| 5/3/2011 11:42:01 | 29.988 | 4/29/2011 08:44:01 | 25.422 |
| 5/3/2011 12:12:01 | 30.425 | 4/29/2011 09:14:01 | 25.422 |
| 5/3/2011 12:42:01 | 30.612 | 4/29/2011 09:44:01 | 25.422 |
| 5/3/2011 13:12:01 | 30.674 | 4/29/2011 10:14:01 | 25.422 |
| 5/3/2011 13:42:01 | 30.737 | 4/29/2011 10:44:01 | 25.422 |
| 5/3/2011 14:12:01 | 30.612 | 4/29/2011 11:14:01 | 25.422 |
| 5/3/2011 14:42:01 | 29.863 | 4/29/2011 11:44:01 | 25.422 |
| 5/3/2011 15:12:01 | 28.864 | 4/29/2011 12:14:01 | 25.422 |
| 5/3/2011 15:42:01 | 27.802 | 4/29/2011 12:44:01 | 25.484 |
| 5/3/2011 16:12:01 | 26.490 | 4/29/2011 13:14:01 | 25.484 |
| 5/3/2011 16:42:01 | 25.303 | 4/29/2011 13:44:01 | 25.484 |
| 5/3/2011 17:12:01 | 24.677 | 4/29/2011 14:14:01 | 25.547 |
| 5/3/2011 17:42:01 | 24.052 | 4/29/2011 14:44:01 | 25.547 |
| 5/3/2011 18:12:01 | 23.240 | 4/29/2011 15:14:01 | 25.547 |
| 5/3/2011 18:42:01 | 22.552 | 4/29/2011 15:44:01 | 25.609 |
| 5/3/2011 19:12:01 | 21.989 | 4/29/2011 16:14:01 | 25.609 |
| 5/3/2011 19:42:01 | 21.801 | 4/29/2011 16:44:01 | 25.609 |
| 5/3/2011 20:12:01 | 21.801 | 4/29/2011 17:14:01 | 25.672 |
| 5/3/2011 20:42:01 | 21.864 | 4/29/2011 17:44:01 | 25.672 |
| 5/3/2011 21:12:01 | 21.739 | 4/29/2011 18:14:01 | 25.672 |
| 5/3/2011 21:42:01 | 21.864 | 4/29/2011 18:44:01 | 25.672 |
| 5/3/2011 22:12:01 | 21.989 | 4/29/2011 19:14:01 | 25.672 |
| 5/3/2011 22:42:01 | 22.176 | 4/29/2011 19:44:01 | 25.734 |
| 5/3/2011 23:12:01 | 22.364 | 4/29/2011 20:14:01 | 25.734 |
| 5/3/2011 23:42:01 | 22.364 | 4/29/2011 20:44:01 | 25.734 |
| 5/4/2011 00:12:01 | 22.176 | 4/29/2011 21:14:01 | 25.734 |
| 5/4/2011 00:42:01 | 22.552 | 4/29/2011 21:44:01 | 25.734 |
| 5/4/2011 01:12:01 | 22.739 | 4/29/2011 22:14:01 | 25.672 |
| 5/4/2011 01:42:01 | 22.302 | 4/29/2011 22:44:01 | 25.672 |
| 5/4/2011 02:12:01 | 21.801 | 4/29/2011 23:14:01 | 25.672 |
| 5/4/2011 02:42:01 | 21.238 | 4/29/2011 23:44:01 | 25.672 |
| 5/4/2011 03:12:01 | 20.675 | 4/30/2011 00:14:01 | 25.609 |
| 5/4/2011 03:42:01 | 20.362 | 4/30/2011 00:44:01 | 25.609 |
| 5/4/2011 04:12:01 | 20.300 | 4/30/2011 01:14:01 | 25.609 |
| 5/4/2011 04:42:01 | 20.237 | 4/30/2011 01:44:01 | 25.547 |
| 5/4/2011 05:12:01 | 20.425 | 4/30/2011 02:14:01 | 25.547 |
| 5/4/2011 05:42:01 | 20.362 | 4/30/2011 02:44:01 | 25.484 |
| 5/4/2011 06:12:01 | 20.112 | 4/30/2011 03:14:01 | 25.484 |
| 5/4/2011 06:42:01 | 20.237 | 4/30/2011 03:44:01 | 25.484 |
| 5/4/2011 07:12:01 | 20.863 | 4/30/2011 04:14:01 | 25.422 |
| 5/4/2011 07:42:01 | 21.926 | 4/30/2011 04:44:01 | 25.422 |
| 5/4/2011 08:12:01 | 23.114 | 4/30/2011 05:14:01 | 25.422 |

|                   |        |                    |        |
|-------------------|--------|--------------------|--------|
| 5/4/2011 08:42:01 | 24.615 | 4/30/2011 05:44:01 | 25.359 |
| 5/4/2011 09:12:01 | 25.865 | 4/30/2011 06:14:01 | 25.359 |
| 5/4/2011 09:42:01 | 26.615 | 4/30/2011 06:44:01 | 25.359 |
| 5/4/2011 10:12:01 | 27.365 | 4/30/2011 07:14:01 | 25.297 |
| 5/4/2011 10:42:01 | 28.426 | 4/30/2011 07:44:01 | 25.297 |
| 5/4/2011 11:12:01 | 29.675 | 4/30/2011 08:14:01 | 25.234 |
| 5/4/2011 11:42:01 | 30.237 | 4/30/2011 08:44:01 | 25.234 |
| 5/4/2011 12:12:01 | 30.737 | 4/30/2011 09:14:01 | 25.234 |
| 5/4/2011 12:42:01 | 30.986 | 4/30/2011 09:44:01 | 25.172 |
| 5/4/2011 13:12:01 | 31.174 | 4/30/2011 10:14:01 | 25.172 |
| 5/4/2011 13:42:01 | 31.423 | 4/30/2011 10:44:01 | 25.172 |
| 5/4/2011 14:12:01 | 31.299 | 4/30/2011 11:14:01 | 25.172 |
| 5/4/2011 14:42:01 | 30.362 | 4/30/2011 11:44:01 | 25.234 |
| 5/4/2011 15:12:01 | 29.738 | 4/30/2011 12:14:01 | 25.234 |
| 5/4/2011 15:42:01 | 28.489 | 4/30/2011 12:44:01 | 25.234 |
| 5/4/2011 16:12:01 | 27.302 | 4/30/2011 13:14:01 | 25.234 |
| 5/4/2011 16:42:01 | 26.490 | 4/30/2011 13:44:01 | 25.297 |
| 5/4/2011 17:12:01 | 25.802 | 4/30/2011 14:14:01 | 25.297 |
| 5/4/2011 17:42:01 | 24.990 | 4/30/2011 14:44:01 | 25.359 |
| 5/4/2011 18:12:01 | 24.240 | 4/30/2011 15:14:01 | 25.359 |
| 5/4/2011 18:42:01 | 23.427 | 4/30/2011 15:44:01 | 25.359 |
| 5/4/2011 19:12:01 | 22.864 | 4/30/2011 16:14:01 | 25.422 |
| 5/4/2011 19:42:01 | 22.239 | 4/30/2011 16:44:01 | 25.422 |
| 5/4/2011 20:12:01 | 21.926 | 4/30/2011 17:14:01 | 25.422 |
| 5/4/2011 20:42:01 | 21.801 | 4/30/2011 17:44:01 | 25.484 |
| 5/4/2011 21:12:01 | 21.551 | 4/30/2011 18:14:01 | 25.484 |
| 5/4/2011 21:42:01 | 21.426 | 4/30/2011 18:44:01 | 25.484 |
| 5/4/2011 22:12:01 | 21.614 | 4/30/2011 19:14:01 | 25.484 |
| 5/4/2011 22:42:01 | 21.801 | 4/30/2011 19:44:01 | 25.547 |
| 5/4/2011 23:12:01 | 21.801 | 4/30/2011 20:14:01 | 25.547 |
| 5/4/2011 23:42:01 | 21.301 | 4/30/2011 20:44:01 | 25.547 |
| 5/5/2011 00:12:01 | 21.113 | 4/30/2011 21:14:01 | 25.547 |
| 5/5/2011 00:42:01 | 21.176 | 4/30/2011 21:44:01 | 25.547 |
| 5/5/2011 01:12:01 | 21.363 | 4/30/2011 22:14:01 | 25.547 |
| 5/5/2011 01:42:01 | 21.488 | 4/30/2011 22:44:01 | 25.547 |
| 5/5/2011 02:12:01 | 21.238 | 4/30/2011 23:14:01 | 25.484 |
| 5/5/2011 02:42:01 | 20.988 | 4/30/2011 23:44:01 | 25.484 |
| 5/5/2011 03:12:01 | 20.800 | 5/1/2011 00:14:01  | 25.484 |
| 5/5/2011 03:42:01 | 20.800 | 5/1/2011 00:44:01  | 25.484 |
| 5/5/2011 04:12:01 | 21.238 | 5/1/2011 01:14:01  | 25.484 |
| 5/5/2011 04:42:01 | 21.551 | 5/1/2011 01:44:01  | 25.422 |
| 5/5/2011 05:12:01 | 21.801 | 5/1/2011 02:14:01  | 25.422 |
| 5/5/2011 05:42:01 | 21.739 | 5/1/2011 02:44:01  | 25.172 |
| 5/5/2011 06:12:01 | 21.363 | 5/1/2011 03:14:01  | 25.172 |
| 5/5/2011 06:42:01 | 20.925 | 5/1/2011 03:44:01  | 25.172 |
| 5/5/2011 07:12:01 | 21.363 | 5/1/2011 04:14:01  | 25.234 |
| 5/5/2011 07:42:01 | 21.739 | 5/1/2011 04:44:01  | 25.234 |
| 5/5/2011 08:12:01 | 22.302 | 5/1/2011 05:14:01  | 25.234 |
| 5/5/2011 08:42:01 | 23.427 | 5/1/2011 05:44:01  | 25.234 |
| 5/5/2011 09:12:01 | 24.365 | 5/1/2011 06:14:01  | 25.234 |

|                   |        |                   |        |
|-------------------|--------|-------------------|--------|
| 5/5/2011 09:42:01 | 25.240 | 5/1/2011 06:44:01 | 25.234 |
| 5/5/2011 10:12:01 | 26.427 | 5/1/2011 07:14:01 | 25.234 |
| 5/5/2011 10:42:01 | 27.427 | 5/1/2011 07:44:01 | 25.234 |
| 5/5/2011 11:12:01 | 28.489 | 5/1/2011 08:14:01 | 25.234 |
| 5/5/2011 11:42:01 | 29.238 | 5/1/2011 08:44:01 | 25.234 |
| 5/5/2011 12:12:01 | 29.738 | 5/1/2011 09:14:01 | 25.234 |
| 5/5/2011 12:42:01 | 30.112 | 5/1/2011 09:44:01 | 25.234 |
| 5/5/2011 13:12:01 | 30.362 | 5/1/2011 10:14:01 | 25.234 |
| 5/5/2011 13:42:01 | 30.487 | 5/1/2011 10:44:01 | 25.234 |
| 5/5/2011 14:12:01 | 29.301 | 5/1/2011 11:14:01 | 25.234 |
| 5/5/2011 14:42:01 | 29.426 | 5/1/2011 11:44:01 | 25.234 |
| 5/5/2011 15:12:01 | 28.739 | 5/1/2011 12:14:01 | 25.297 |
| 5/5/2011 15:42:01 | 27.365 | 5/1/2011 12:44:01 | 25.297 |
| 5/5/2011 16:12:01 | 26.240 | 5/1/2011 13:14:01 | 25.359 |
| 5/5/2011 16:42:01 | 25.615 | 5/1/2011 13:44:01 | 25.359 |
| 5/5/2011 17:12:01 | 24.927 | 5/1/2011 14:14:01 | 25.422 |
| 5/5/2011 17:42:01 | 24.302 | 5/1/2011 14:44:01 | 25.422 |
| 5/5/2011 18:12:01 | 23.740 | 5/1/2011 15:14:01 | 25.484 |
| 5/5/2011 18:42:01 | 23.114 | 5/1/2011 15:44:01 | 25.484 |
| 5/5/2011 19:12:01 | 22.364 | 5/1/2011 16:14:01 | 25.547 |
| 5/5/2011 19:42:01 | 21.926 | 5/1/2011 16:44:01 | 25.547 |
| 5/5/2011 20:12:01 | 21.551 | 5/1/2011 17:14:01 | 25.547 |
| 5/5/2011 20:42:01 | 21.176 | 5/1/2011 17:44:01 | 25.609 |
| 5/5/2011 21:12:01 | 20.988 | 5/1/2011 18:14:01 | 25.609 |
| 5/5/2011 21:42:01 | 20.988 | 5/1/2011 18:44:01 | 25.609 |
| 5/5/2011 22:12:01 | 20.988 | 5/1/2011 19:14:01 | 25.672 |
| 5/5/2011 22:42:01 | 20.800 | 5/1/2011 19:44:01 | 25.672 |
| 5/5/2011 23:12:01 | 20.675 | 5/1/2011 20:14:01 | 25.672 |
| 5/5/2011 23:42:01 | 20.613 | 5/1/2011 20:44:01 | 25.672 |
| 5/6/2011 00:12:01 | 20.425 | 5/1/2011 21:14:01 | 25.672 |
| 5/6/2011 00:42:01 | 20.550 | 5/1/2011 21:44:01 | 25.672 |
| 5/6/2011 01:12:01 | 20.613 | 5/1/2011 22:14:01 | 25.672 |
| 5/6/2011 01:42:01 | 20.800 | 5/1/2011 22:44:01 | 25.672 |
| 5/6/2011 02:12:01 | 20.863 | 5/1/2011 23:14:01 | 25.672 |
| 5/6/2011 02:42:01 | 20.738 | 5/1/2011 23:44:01 | 25.609 |
| 5/6/2011 03:12:01 | 20.675 | 5/2/2011 00:14:01 | 25.609 |
| 5/6/2011 03:42:01 | 20.988 | 5/2/2011 00:44:01 | 25.609 |
| 5/6/2011 04:12:01 | 21.051 | 5/2/2011 01:14:01 | 25.609 |
| 5/6/2011 04:42:01 | 21.301 | 5/2/2011 01:44:01 | 25.609 |
| 5/6/2011 05:12:01 | 21.614 | 5/2/2011 02:14:01 | 25.609 |
| 5/6/2011 05:42:01 | 21.739 | 5/2/2011 02:44:01 | 25.609 |
| 5/6/2011 06:12:01 | 21.926 | 5/2/2011 03:14:01 | 25.547 |
| 5/6/2011 06:42:01 | 22.051 | 5/2/2011 03:44:01 | 25.547 |
| 5/6/2011 07:12:01 | 22.364 | 5/2/2011 04:14:01 | 25.547 |
| 5/6/2011 07:42:01 | 22.864 | 5/2/2011 04:44:01 | 25.547 |
| 5/6/2011 08:12:01 | 24.490 | 5/2/2011 05:14:01 | 25.547 |
| 5/6/2011 08:42:01 | 25.865 | 5/2/2011 05:44:01 | 25.547 |
| 5/6/2011 09:12:01 | 26.115 | 5/2/2011 06:14:01 | 25.484 |
| 5/6/2011 09:42:01 | 27.365 | 5/2/2011 06:44:01 | 25.484 |
| 5/6/2011 10:12:01 | 28.177 | 5/2/2011 07:14:01 | 25.484 |

|                   |        |                   |        |
|-------------------|--------|-------------------|--------|
| 5/6/2011 10:42:01 | 29.113 | 5/2/2011 07:44:01 | 25.484 |
| 5/6/2011 11:12:01 | 30.112 | 5/2/2011 08:14:01 | 25.422 |
| 5/6/2011 11:42:01 | 30.362 | 5/2/2011 08:44:01 | 25.422 |
| 5/6/2011 12:12:01 | 31.049 | 5/2/2011 09:14:01 | 25.422 |
| 5/6/2011 12:42:01 | 30.737 | 5/2/2011 09:44:01 | 25.422 |
| 5/6/2011 13:12:01 | 30.549 | 5/2/2011 10:14:01 | 25.422 |
| 5/6/2011 13:42:01 | 29.863 | 5/2/2011 10:44:01 | 25.422 |
| 5/6/2011 14:12:01 | 30.487 | 5/2/2011 11:14:01 | 25.422 |
| 5/6/2011 14:42:01 | 29.113 | 5/2/2011 11:44:01 | 25.422 |
| 5/6/2011 15:12:01 | 28.989 | 5/2/2011 12:14:01 | 25.422 |
| 5/6/2011 15:42:01 | 27.927 | 5/2/2011 12:44:01 | 25.484 |
| 5/6/2011 16:12:01 | 27.177 | 5/2/2011 13:14:01 | 25.484 |
| 5/6/2011 16:42:01 | 26.240 | 5/2/2011 13:44:01 | 25.484 |
| 5/6/2011 17:12:01 | 25.677 | 5/2/2011 14:14:01 | 25.547 |
| 5/6/2011 17:42:01 | 25.115 | 5/2/2011 14:44:01 | 25.547 |
| 5/6/2011 18:12:01 | 24.490 | 5/2/2011 15:14:01 | 25.547 |
| 5/6/2011 18:42:01 | 23.927 | 5/2/2011 15:44:01 | 25.609 |
| 5/6/2011 19:12:01 | 23.365 | 5/2/2011 16:14:01 | 25.609 |
| 5/6/2011 19:42:01 | 22.739 | 5/2/2011 16:44:01 | 25.609 |
| 5/6/2011 20:12:01 | 22.489 | 5/2/2011 17:14:01 | 25.672 |
| 5/6/2011 20:42:01 | 22.239 | 5/2/2011 17:44:01 | 25.672 |
| 5/6/2011 21:12:01 | 22.176 | 5/2/2011 18:14:01 | 25.672 |
| 5/6/2011 21:42:01 | 22.239 | 5/2/2011 18:44:01 | 25.672 |
| 5/6/2011 22:12:01 | 22.302 | 5/2/2011 19:14:01 | 25.672 |
| 5/6/2011 22:42:01 | 22.427 | 5/2/2011 19:44:01 | 25.672 |
| 5/6/2011 23:12:01 | 22.677 | 5/2/2011 20:14:01 | 25.672 |
| 5/6/2011 23:42:01 | 22.739 | 5/2/2011 20:44:01 | 25.672 |
| 5/7/2011 00:12:01 | 22.427 | 5/2/2011 21:14:01 | 25.672 |
| 5/7/2011 00:42:01 | 22.176 | 5/2/2011 21:44:01 | 25.672 |
| 5/7/2011 01:12:01 | 21.739 | 5/2/2011 22:14:01 | 25.609 |
| 5/7/2011 01:42:01 | 21.426 | 5/2/2011 22:44:01 | 25.609 |
| 5/7/2011 02:12:01 | 21.176 | 5/2/2011 23:14:01 | 25.609 |
| 5/7/2011 02:42:01 | 20.988 | 5/2/2011 23:44:01 | 25.547 |
| 5/7/2011 03:12:01 | 20.863 | 5/3/2011 00:14:01 | 25.547 |
| 5/7/2011 03:42:01 | 20.675 | 5/3/2011 00:44:01 | 25.547 |
| 5/7/2011 04:12:01 | 20.487 | 5/3/2011 01:14:01 | 25.547 |
| 5/7/2011 04:42:01 | 20.362 | 5/3/2011 01:44:01 | 25.547 |
| 5/7/2011 05:12:01 | 20.425 | 5/3/2011 02:14:01 | 25.484 |
| 5/7/2011 05:42:01 | 20.738 | 5/3/2011 02:44:01 | 25.484 |
| 5/7/2011 06:12:01 | 20.863 | 5/3/2011 03:14:01 | 25.484 |
| 5/7/2011 06:42:01 | 20.863 | 5/3/2011 03:44:01 | 25.484 |
| 5/7/2011 07:12:01 | 21.363 | 5/3/2011 04:14:01 | 25.422 |
| 5/7/2011 07:42:01 | 22.489 | 5/3/2011 04:44:01 | 25.422 |
| 5/7/2011 08:12:01 | 23.990 | 5/3/2011 05:14:01 | 25.422 |
| 5/7/2011 08:42:01 | 25.615 | 5/3/2011 05:44:01 | 25.422 |
| 5/7/2011 09:12:01 | 26.552 | 5/3/2011 06:14:01 | 25.359 |
| 5/7/2011 09:42:01 | 27.552 | 5/3/2011 06:44:01 | 25.359 |
| 5/7/2011 10:12:01 | 28.864 | 5/3/2011 07:14:01 | 25.359 |
| 5/7/2011 10:42:01 | 29.988 | 5/3/2011 07:44:01 | 25.359 |
| 5/7/2011 11:12:01 | 29.301 | 5/3/2011 08:14:01 | 25.297 |

|                   |        |                   |        |
|-------------------|--------|-------------------|--------|
| 5/7/2011 11:42:01 | 30.050 | 5/3/2011 08:44:01 | 25.297 |
| 5/7/2011 12:12:01 | 30.924 | 5/3/2011 09:14:01 | 25.297 |
| 5/7/2011 12:42:01 | 29.426 | 5/3/2011 09:44:01 | 25.234 |
| 5/7/2011 13:12:01 | 28.614 | 5/3/2011 10:14:01 | 25.234 |
| 5/7/2011 13:42:01 | 30.300 | 5/3/2011 10:44:01 | 25.234 |
| 5/7/2011 14:12:01 | 30.612 | 5/3/2011 11:14:01 | 25.234 |
| 5/7/2011 14:42:01 | 30.487 | 5/3/2011 11:44:01 | 25.234 |
| 5/7/2011 15:12:01 | 29.988 | 5/3/2011 12:14:01 | 25.297 |
| 5/7/2011 15:42:01 | 28.614 | 5/3/2011 12:44:01 | 25.297 |
| 5/7/2011 16:12:01 | 27.365 | 5/3/2011 13:14:01 | 25.297 |
| 5/7/2011 16:42:01 | 26.302 | 5/3/2011 13:44:01 | 25.297 |
| 5/7/2011 17:12:01 | 25.428 | 5/3/2011 14:14:01 | 25.297 |
| 5/7/2011 17:42:01 | 24.677 | 5/3/2011 14:44:01 | 25.359 |
| 5/7/2011 18:12:01 | 23.990 | 5/3/2011 15:14:01 | 25.359 |
| 5/7/2011 18:42:01 | 23.365 | 5/3/2011 15:44:01 | 25.359 |
| 5/7/2011 19:12:01 | 22.677 | 5/3/2011 16:14:01 | 25.422 |
| 5/7/2011 19:42:01 | 22.176 | 5/3/2011 16:44:01 | 25.422 |
| 5/7/2011 20:12:01 | 21.989 | 5/3/2011 17:14:01 | 25.422 |
| 5/7/2011 20:42:01 | 21.989 | 5/3/2011 17:44:01 | 25.422 |
| 5/7/2011 21:12:01 | 21.864 | 5/3/2011 18:14:01 | 25.422 |
| 5/7/2011 21:42:01 | 21.739 | 5/3/2011 18:44:01 | 25.422 |
| 5/7/2011 22:12:01 | 21.488 | 5/3/2011 19:14:01 | 25.422 |
| 5/7/2011 22:42:01 | 21.363 | 5/3/2011 19:44:01 | 25.422 |
| 5/7/2011 23:12:01 | 21.301 | 5/3/2011 20:14:01 | 25.422 |
| 5/7/2011 23:42:01 | 20.988 | 5/3/2011 20:44:01 | 25.422 |
| 5/8/2011 00:12:01 | 20.863 | 5/3/2011 21:14:01 | 25.422 |
| 5/8/2011 00:42:01 | 20.800 | 5/3/2011 21:44:01 | 25.422 |
| 5/8/2011 01:12:01 | 20.550 | 5/3/2011 22:14:01 | 25.359 |
| 5/8/2011 01:42:01 | 20.425 | 5/3/2011 22:44:01 | 25.359 |
| 5/8/2011 02:12:01 | 20.237 | 5/3/2011 23:14:01 | 25.359 |
| 5/8/2011 02:42:01 | 19.987 | 5/3/2011 23:44:01 | 25.297 |
| 5/8/2011 03:12:01 | 20.237 | 5/4/2011 00:14:01 | 25.297 |
| 5/8/2011 03:42:01 | 20.425 | 5/4/2011 00:44:01 | 25.297 |
| 5/8/2011 04:12:01 | 20.487 | 5/4/2011 01:14:01 | 25.297 |
| 5/8/2011 04:42:01 | 20.425 | 5/4/2011 01:44:01 | 25.234 |
| 5/8/2011 05:12:01 | 20.237 | 5/4/2011 02:14:01 | 25.234 |
| 5/8/2011 05:42:01 | 19.987 | 5/4/2011 02:44:01 | 25.234 |
| 5/8/2011 06:12:01 | 19.674 | 5/4/2011 03:14:01 | 25.234 |
| 5/8/2011 06:42:01 | 19.611 | 5/4/2011 03:44:01 | 25.234 |
| 5/8/2011 07:12:01 | 20.237 | 5/4/2011 04:14:01 | 25.172 |
| 5/8/2011 07:42:01 | 21.551 | 5/4/2011 04:44:01 | 25.172 |
| 5/8/2011 08:12:01 | 23.302 | 5/4/2011 05:14:01 | 25.172 |
| 5/8/2011 08:42:01 | 24.927 | 5/4/2011 05:44:01 | 25.109 |
| 5/8/2011 09:12:01 | 26.302 | 5/4/2011 06:14:01 | 25.109 |
| 5/8/2011 09:42:01 | 27.489 | 5/4/2011 06:44:01 | 25.109 |
| 5/8/2011 10:12:01 | 28.676 | 5/4/2011 07:14:01 | 25.047 |
| 5/8/2011 10:42:01 | 29.613 | 5/4/2011 07:44:01 | 25.047 |
| 5/8/2011 11:12:01 | 30.612 | 5/4/2011 08:14:01 | 25.047 |
| 5/8/2011 11:42:01 | 30.050 | 5/4/2011 08:44:01 | 24.984 |
| 5/8/2011 12:12:01 | 30.674 | 5/4/2011 09:14:01 | 24.984 |

|                   |        |                   |        |
|-------------------|--------|-------------------|--------|
| 5/8/2011 12:42:01 | 31.236 | 5/4/2011 09:44:01 | 24.922 |
| 5/8/2011 13:12:01 | 30.300 | 5/4/2011 10:14:01 | 24.922 |
| 5/8/2011 13:42:01 | 30.986 | 5/4/2011 10:44:01 | 24.922 |
| 5/8/2011 14:12:01 | 30.549 | 5/4/2011 11:14:01 | 24.922 |
| 5/8/2011 14:42:01 | 31.049 | 5/4/2011 11:44:01 | 24.922 |
| 5/8/2011 15:12:01 | 29.988 | 5/4/2011 12:14:01 | 24.922 |
| 5/8/2011 15:42:01 | 28.426 | 5/4/2011 12:44:01 | 24.922 |
| 5/8/2011 16:12:01 | 27.552 | 5/4/2011 13:14:01 | 24.984 |
| 5/8/2011 16:42:01 | 26.552 | 5/4/2011 13:44:01 | 24.984 |
| 5/8/2011 17:12:01 | 25.552 | 5/4/2011 14:14:01 | 24.984 |
| 5/8/2011 17:42:01 | 24.552 | 5/4/2011 14:44:01 | 25.047 |
| 5/8/2011 18:12:01 | 23.802 | 5/4/2011 15:14:01 | 25.047 |
| 5/8/2011 18:42:01 | 23.052 | 5/4/2011 15:44:01 | 25.109 |
| 5/8/2011 19:12:01 | 22.302 | 5/4/2011 16:14:01 | 25.109 |
| 5/8/2011 19:42:01 | 21.676 | 5/4/2011 16:44:01 | 25.109 |
| 5/8/2011 20:12:01 | 21.176 | 5/4/2011 17:14:01 | 25.172 |
| 5/8/2011 20:42:01 | 21.176 | 5/4/2011 17:44:01 | 25.172 |
| 5/8/2011 21:12:01 | 20.988 | 5/4/2011 18:14:01 | 25.234 |
| 5/8/2011 21:42:01 | 20.800 | 5/4/2011 18:44:01 | 25.234 |
| 5/8/2011 22:12:01 | 20.675 | 5/4/2011 19:14:01 | 25.234 |
| 5/8/2011 22:42:01 | 20.362 | 5/4/2011 19:44:01 | 25.234 |
| 5/8/2011 23:12:01 | 20.112 | 5/4/2011 20:14:01 | 25.234 |
| 5/8/2011 23:42:01 | 19.924 | 5/4/2011 20:44:01 | 25.234 |
| 5/9/2011 00:12:01 | 19.674 | 5/4/2011 21:14:01 | 25.234 |
| 5/9/2011 00:42:01 | 19.486 | 5/4/2011 21:44:01 | 25.234 |
| 5/9/2011 01:12:01 | 19.111 | 5/4/2011 22:14:01 | 25.234 |
| 5/9/2011 01:42:01 | 18.735 | 5/4/2011 22:44:01 | 25.234 |
| 5/9/2011 02:12:01 | 18.485 | 5/4/2011 23:14:01 | 25.234 |
| 5/9/2011 02:42:01 | 18.235 | 5/4/2011 23:44:01 | 25.234 |
| 5/9/2011 03:12:01 | 18.109 | 5/5/2011 00:14:01 | 25.172 |
| 5/9/2011 03:42:01 | 17.859 | 5/5/2011 00:44:01 | 25.172 |
| 5/9/2011 04:12:01 | 17.609 | 5/5/2011 01:14:01 | 25.172 |
| 5/9/2011 04:42:01 | 17.233 | 5/5/2011 01:44:01 | 25.109 |
| 5/9/2011 05:12:01 | 16.920 | 5/5/2011 02:14:01 | 25.109 |
| 5/9/2011 05:42:01 | 16.795 | 5/5/2011 02:44:01 | 25.109 |
| 5/9/2011 06:12:01 | 16.607 | 5/5/2011 03:14:01 | 25.109 |
| 5/9/2011 06:42:01 | 16.732 | 5/5/2011 03:44:01 | 25.047 |
| 5/9/2011 07:12:01 | 17.546 | 5/5/2011 04:14:01 | 25.047 |
| 5/9/2011 07:42:01 | 18.986 | 5/5/2011 04:44:01 | 25.047 |
| 5/9/2011 08:12:01 | 20.738 | 5/5/2011 05:14:01 | 24.984 |
| 5/9/2011 08:42:01 | 22.864 | 5/5/2011 05:44:01 | 24.984 |
| 5/9/2011 09:12:01 | 24.490 | 5/5/2011 06:14:01 | 24.984 |
| 5/9/2011 09:42:01 | 25.927 | 5/5/2011 06:44:01 | 24.922 |
| 5/9/2011 10:12:01 | 27.052 | 5/5/2011 07:14:01 | 24.922 |
| 5/9/2011 10:42:01 | 28.239 | 5/5/2011 07:44:01 | 24.922 |
| 5/9/2011 11:12:01 | 29.301 | 5/5/2011 08:14:01 | 24.922 |
| 5/9/2011 11:42:01 | 29.800 | 5/5/2011 08:44:01 | 24.922 |
| 5/9/2011 12:12:01 | 30.612 | 5/5/2011 09:14:01 | 24.859 |
| 5/9/2011 12:42:01 | 30.737 | 5/5/2011 09:44:01 | 24.859 |
| 5/9/2011 13:12:01 | 30.799 | 5/5/2011 10:14:01 | 24.859 |

|                    |        |                   |        |
|--------------------|--------|-------------------|--------|
| 5/9/2011 13:42:01  | 31.236 | 5/5/2011 10:44:01 | 24.859 |
| 5/9/2011 14:12:01  | 31.049 | 5/5/2011 11:14:01 | 24.859 |
| 5/9/2011 14:42:01  | 30.487 | 5/5/2011 11:44:01 | 24.859 |
| 5/9/2011 15:12:01  | 29.363 | 5/5/2011 12:14:01 | 24.859 |
| 5/9/2011 15:42:01  | 27.739 | 5/5/2011 12:44:01 | 24.922 |
| 5/9/2011 16:12:01  | 26.240 | 5/5/2011 13:14:01 | 24.922 |
| 5/9/2011 16:42:01  | 24.990 | 5/5/2011 13:44:01 | 24.922 |
| 5/9/2011 17:12:01  | 23.740 | 5/5/2011 14:14:01 | 24.984 |
| 5/9/2011 17:42:01  | 23.052 | 5/5/2011 14:44:01 | 24.984 |
| 5/9/2011 18:12:01  | 22.114 | 5/5/2011 15:14:01 | 24.984 |
| 5/9/2011 18:42:01  | 21.363 | 5/5/2011 15:44:01 | 25.047 |
| 5/9/2011 19:12:01  | 20.800 | 5/5/2011 16:14:01 | 25.047 |
| 5/9/2011 19:42:01  | 20.175 | 5/5/2011 16:44:01 | 25.109 |
| 5/9/2011 20:12:01  | 19.924 | 5/5/2011 17:14:01 | 25.109 |
| 5/9/2011 20:42:01  | 19.987 | 5/5/2011 17:44:01 | 25.109 |
| 5/9/2011 21:12:01  | 20.112 | 5/5/2011 18:14:01 | 25.172 |
| 5/9/2011 21:42:01  | 20.237 | 5/5/2011 18:44:01 | 25.172 |
| 5/9/2011 22:12:01  | 19.799 | 5/5/2011 19:14:01 | 25.172 |
| 5/9/2011 22:42:01  | 19.611 | 5/5/2011 19:44:01 | 25.172 |
| 5/9/2011 23:12:01  | 19.361 | 5/5/2011 20:14:01 | 25.172 |
| 5/9/2011 23:42:01  | 19.111 | 5/5/2011 20:44:01 | 25.234 |
| 5/10/2011 00:12:01 | 18.860 | 5/5/2011 21:14:01 | 25.234 |
| 5/10/2011 00:42:01 | 18.610 | 5/5/2011 21:44:01 | 25.172 |
| 5/10/2011 01:12:01 | 18.297 | 5/5/2011 22:14:01 | 25.172 |
| 5/10/2011 01:42:01 | 18.172 | 5/5/2011 22:44:01 | 25.172 |
| 5/10/2011 02:12:01 | 18.235 | 5/5/2011 23:14:01 | 25.172 |
| 5/10/2011 02:42:01 | 18.109 | 5/5/2011 23:44:01 | 25.109 |
| 5/10/2011 03:12:01 | 17.984 | 5/6/2011 00:14:01 | 25.109 |
| 5/10/2011 03:42:01 | 18.047 | 5/6/2011 00:44:01 | 25.109 |
| 5/10/2011 04:12:01 | 17.984 | 5/6/2011 01:14:01 | 25.047 |
| 5/10/2011 04:42:01 | 17.984 | 5/6/2011 01:44:01 | 25.047 |
| 5/10/2011 05:12:01 | 17.859 | 5/6/2011 02:14:01 | 25.047 |
| 5/10/2011 05:42:01 | 17.734 | 5/6/2011 02:44:01 | 24.984 |
| 5/10/2011 06:12:01 | 17.671 | 5/6/2011 03:14:01 | 24.984 |
| 5/10/2011 06:42:01 | 17.734 | 5/6/2011 03:44:01 | 24.922 |
| 5/10/2011 07:12:01 | 18.422 | 5/6/2011 04:14:01 | 24.922 |
| 5/10/2011 07:42:01 | 19.862 | 5/6/2011 04:44:01 | 24.922 |
| 5/10/2011 08:12:01 | 21.739 | 5/6/2011 05:14:01 | 24.859 |
| 5/10/2011 08:42:01 | 23.552 | 5/6/2011 05:44:01 | 24.859 |
| 5/10/2011 09:12:01 | 25.115 | 5/6/2011 06:14:01 | 24.859 |
| 5/10/2011 09:42:01 | 26.552 | 5/6/2011 06:44:01 | 24.797 |
| 5/10/2011 10:12:01 | 27.802 | 5/6/2011 07:14:01 | 24.797 |
| 5/10/2011 10:42:01 | 29.051 | 5/6/2011 07:44:01 | 24.797 |
| 5/10/2011 11:12:01 | 30.050 | 5/6/2011 08:14:01 | 24.797 |
| 5/10/2011 11:42:01 | 30.674 | 5/6/2011 08:44:01 | 24.797 |
| 5/10/2011 12:12:01 | 30.300 | 5/6/2011 09:14:01 | 24.797 |
| 5/10/2011 12:42:01 | 31.486 | 5/6/2011 09:44:01 | 24.797 |
| 5/10/2011 13:12:01 | 30.549 | 5/6/2011 10:14:01 | 24.734 |
| 5/10/2011 13:42:01 | 31.236 | 5/6/2011 10:44:01 | 24.797 |
| 5/10/2011 14:12:01 | 30.862 | 5/6/2011 11:14:01 | 24.797 |

|                    |        |                   |        |
|--------------------|--------|-------------------|--------|
| 5/10/2011 14:42:01 | 30.425 | 5/6/2011 11:44:01 | 24.797 |
| 5/10/2011 15:12:01 | 29.863 | 5/6/2011 12:14:01 | 24.859 |
| 5/10/2011 15:42:01 | 28.302 | 5/6/2011 12:44:01 | 24.859 |
| 5/10/2011 16:12:01 | 26.740 | 5/6/2011 13:14:01 | 24.922 |
| 5/10/2011 16:42:01 | 25.927 | 5/6/2011 13:44:01 | 24.922 |
| 5/10/2011 17:12:01 | 25.240 | 5/6/2011 14:14:01 | 24.984 |
| 5/10/2011 17:42:01 | 24.115 | 5/6/2011 14:44:01 | 24.984 |
| 5/10/2011 18:12:01 | 23.052 | 5/6/2011 15:14:01 | 25.047 |
| 5/10/2011 18:42:01 | 22.239 | 5/6/2011 15:44:01 | 25.047 |
| 5/10/2011 19:12:01 | 21.676 | 5/6/2011 16:14:01 | 25.109 |
| 5/10/2011 19:42:01 | 21.301 | 5/6/2011 16:44:01 | 25.109 |
| 5/10/2011 20:12:01 | 21.238 | 5/6/2011 17:14:01 | 25.109 |
| 5/10/2011 20:42:01 | 21.051 | 5/6/2011 17:44:01 | 25.172 |
| 5/10/2011 21:12:01 | 21.113 | 5/6/2011 18:14:01 | 25.172 |
| 5/10/2011 21:42:01 | 20.863 | 5/6/2011 18:44:01 | 25.172 |
| 5/10/2011 22:12:01 | 20.613 | 5/6/2011 19:14:01 | 25.234 |
| 5/10/2011 22:42:01 | 20.300 | 5/6/2011 19:44:01 | 25.234 |
| 5/10/2011 23:12:01 | 20.112 | 5/6/2011 20:14:01 | 25.234 |
| 5/10/2011 23:42:01 | 20.175 | 5/6/2011 20:44:01 | 25.234 |
| 5/11/2011 00:12:01 | 19.862 | 5/6/2011 21:14:01 | 25.234 |
| 5/11/2011 00:42:01 | 19.799 | 5/6/2011 21:44:01 | 25.234 |
| 5/11/2011 01:12:01 | 20.237 | 5/6/2011 22:14:01 | 25.234 |
| 5/11/2011 01:42:01 | 20.487 | 5/6/2011 22:44:01 | 25.234 |
| 5/11/2011 02:12:01 | 20.237 | 5/6/2011 23:14:01 | 25.234 |
| 5/11/2011 02:42:01 | 19.737 | 5/6/2011 23:44:01 | 25.172 |
| 5/11/2011 03:12:01 | 19.361 | 5/7/2011 00:14:01 | 25.172 |
| 5/11/2011 03:42:01 | 19.048 | 5/7/2011 00:44:01 | 25.172 |
| 5/11/2011 04:12:01 | 18.798 | 5/7/2011 01:14:01 | 25.172 |
| 5/11/2011 04:42:01 | 18.610 | 5/7/2011 01:44:01 | 25.109 |
| 5/11/2011 05:12:01 | 18.485 | 5/7/2011 02:14:01 | 25.109 |
| 5/11/2011 05:42:01 | 18.422 | 5/7/2011 02:44:01 | 25.109 |
| 5/11/2011 06:12:01 | 18.548 | 5/7/2011 03:14:01 | 25.109 |
| 5/11/2011 06:42:01 | 19.048 | 5/7/2011 03:44:01 | 25.047 |
| 5/11/2011 07:12:01 | 19.924 | 5/7/2011 04:14:01 | 25.047 |
| 5/11/2011 07:42:01 | 21.113 | 5/7/2011 04:44:01 | 25.047 |
| 5/11/2011 08:12:01 | 22.114 | 5/7/2011 05:14:01 | 25.047 |
| 5/11/2011 08:42:01 | 23.740 | 5/7/2011 05:44:01 | 24.984 |
| 5/11/2011 09:12:01 | 25.240 | 5/7/2011 06:14:01 | 24.984 |
| 5/11/2011 09:42:01 | 26.677 | 5/7/2011 06:44:01 | 24.984 |
| 5/11/2011 10:12:01 | 27.552 | 5/7/2011 07:14:01 | 24.922 |
| 5/11/2011 10:42:01 | 28.739 | 5/7/2011 07:44:01 | 24.922 |
| 5/11/2011 11:12:01 | 29.738 | 5/7/2011 08:14:01 | 24.922 |
| 5/11/2011 11:42:01 | 30.549 | 5/7/2011 08:44:01 | 24.859 |
| 5/11/2011 12:12:01 | 31.111 | 5/7/2011 09:14:01 | 24.859 |
| 5/11/2011 12:42:01 | 30.549 | 5/7/2011 09:44:01 | 24.859 |
| 5/11/2011 13:12:01 | 31.423 | 5/7/2011 10:14:01 | 24.859 |
| 5/11/2011 13:42:01 | 30.924 | 5/7/2011 10:44:01 | 24.859 |
| 5/11/2011 14:12:01 | 29.988 | 5/7/2011 11:14:01 | 24.859 |
| 5/11/2011 14:42:01 | 29.800 | 5/7/2011 11:44:01 | 24.859 |
| 5/11/2011 15:12:01 | 28.989 | 5/7/2011 12:14:01 | 24.859 |



|                    |        |                   |        |
|--------------------|--------|-------------------|--------|
| 5/11/2011 15:42:01 | 28.177 | 5/7/2011 12:44:01 | 24.922 |
| 5/11/2011 16:12:01 | 27.177 | 5/7/2011 13:14:01 | 24.922 |
| 5/11/2011 16:42:01 | 25.990 | 5/7/2011 13:44:01 | 24.984 |
| 5/11/2011 17:12:01 | 24.677 | 5/7/2011 14:14:01 | 24.984 |
| 5/11/2011 17:42:01 | 23.740 | 5/7/2011 14:44:01 | 25.047 |
| 5/11/2011 18:12:01 | 22.864 | 5/7/2011 15:14:01 | 25.047 |
| 5/11/2011 18:42:01 | 22.114 | 5/7/2011 15:44:01 | 25.109 |
| 5/11/2011 19:12:01 | 21.676 | 5/7/2011 16:14:01 | 25.109 |
| 5/11/2011 19:42:01 | 21.426 | 5/7/2011 16:44:01 | 25.109 |
| 5/11/2011 20:12:01 | 21.363 | 5/7/2011 17:14:01 | 25.172 |
| 5/11/2011 20:42:01 | 21.426 | 5/7/2011 17:44:01 | 25.172 |
| 5/11/2011 21:12:01 | 21.051 | 5/7/2011 18:14:01 | 25.172 |
| 5/11/2011 21:42:01 | 20.925 | 5/7/2011 18:44:01 | 25.234 |
| 5/11/2011 22:12:01 | 20.550 | 5/7/2011 19:14:01 | 25.234 |
| 5/11/2011 22:42:01 | 20.362 | 5/7/2011 19:44:01 | 25.234 |
| 5/11/2011 23:12:01 | 20.487 | 5/7/2011 20:14:01 | 25.234 |
| 5/11/2011 23:42:01 | 20.425 | 5/7/2011 20:44:01 | 25.234 |
| 5/12/2011 00:12:01 | 20.425 | 5/7/2011 21:14:01 | 25.234 |
| 5/12/2011 00:42:01 | 20.300 | 5/7/2011 21:44:01 | 25.234 |
| 5/12/2011 01:12:01 | 20.112 | 5/7/2011 22:14:01 | 25.234 |
| 5/12/2011 01:42:01 | 19.924 | 5/7/2011 22:44:01 | 25.234 |
| 5/12/2011 02:12:01 | 19.611 | 5/7/2011 23:14:01 | 25.172 |
| 5/12/2011 02:42:01 | 19.236 | 5/7/2011 23:44:01 | 25.172 |
| 5/12/2011 03:12:01 | 18.923 | 5/8/2011 00:14:01 | 25.172 |
| 5/12/2011 03:42:01 | 18.860 | 5/8/2011 00:44:01 | 25.109 |
| 5/12/2011 04:12:01 | 18.986 | 5/8/2011 01:14:01 | 25.109 |
| 5/12/2011 04:42:01 | 19.299 | 5/8/2011 01:44:01 | 25.109 |
| 5/12/2011 05:12:01 | 19.361 | 5/8/2011 02:14:01 | 25.047 |
| 5/12/2011 05:42:01 | 19.361 | 5/8/2011 02:44:01 | 25.047 |
| 5/12/2011 06:12:01 | 19.173 | 5/8/2011 03:14:01 | 25.047 |
| 5/12/2011 06:42:01 | 18.923 | 5/8/2011 03:44:01 | 24.984 |
| 5/12/2011 07:12:01 | 19.299 | 5/8/2011 04:14:01 | 24.984 |
| 5/12/2011 07:42:01 | 20.550 | 5/8/2011 04:44:01 | 24.922 |
| 5/12/2011 08:12:01 | 22.114 | 5/8/2011 05:14:01 | 24.922 |
| 5/12/2011 08:42:01 | 23.990 | 5/8/2011 05:44:01 | 24.922 |
| 5/12/2011 09:12:01 | 25.490 | 5/8/2011 06:14:01 | 24.859 |
| 5/12/2011 09:42:01 | 26.740 | 5/8/2011 06:44:01 | 24.859 |
| 5/12/2011 10:12:01 | 28.052 | 5/8/2011 07:14:01 | 24.797 |
| 5/12/2011 10:42:01 | 29.238 | 5/8/2011 07:44:01 | 24.797 |
| 5/12/2011 11:12:01 | 30.362 | 5/8/2011 08:14:01 | 24.797 |
| 5/12/2011 11:42:01 | 30.799 | 5/8/2011 08:44:01 | 24.734 |
| 5/12/2011 12:12:01 | 31.174 | 5/8/2011 09:14:01 | 24.734 |
| 5/12/2011 12:42:01 | 31.735 | 5/8/2011 09:44:01 | 24.734 |
| 5/12/2011 13:12:01 | 31.860 | 5/8/2011 10:14:01 | 24.734 |
| 5/12/2011 13:42:01 | 31.174 | 5/8/2011 10:44:01 | 24.672 |
| 5/12/2011 14:12:01 | 31.174 | 5/8/2011 11:14:01 | 24.672 |
| 5/12/2011 14:42:01 | 31.423 | 5/8/2011 11:44:01 | 24.734 |
| 5/12/2011 15:12:01 | 29.800 | 5/8/2011 12:14:01 | 24.734 |
| 5/12/2011 15:42:01 | 28.614 | 5/8/2011 12:44:01 | 24.797 |
| 5/12/2011 16:12:01 | 27.240 | 5/8/2011 13:14:01 | 24.797 |

|                    |        |                   |        |
|--------------------|--------|-------------------|--------|
| 5/12/2011 16:42:01 | 26.365 | 5/8/2011 13:44:01 | 24.859 |
| 5/12/2011 17:12:01 | 25.615 | 5/8/2011 14:14:01 | 24.859 |
| 5/12/2011 17:42:01 | 24.927 | 5/8/2011 14:44:01 | 24.922 |
| 5/12/2011 18:12:01 | 24.115 | 5/8/2011 15:14:01 | 24.922 |
| 5/12/2011 18:42:01 | 23.427 | 5/8/2011 15:44:01 | 24.984 |
| 5/12/2011 19:12:01 | 22.927 | 5/8/2011 16:14:01 | 24.984 |
| 5/12/2011 19:42:01 | 22.364 | 5/8/2011 16:44:01 | 24.984 |
| 5/12/2011 20:12:01 | 22.364 | 5/8/2011 17:14:01 | 25.047 |
| 5/12/2011 20:42:01 | 22.614 | 5/8/2011 17:44:01 | 25.047 |
| 5/12/2011 21:12:01 | 22.614 | 5/8/2011 18:14:01 | 25.047 |
| 5/12/2011 21:42:01 | 22.739 | 5/8/2011 18:44:01 | 25.109 |
| 5/12/2011 22:12:01 | 22.802 | 5/8/2011 19:14:01 | 25.109 |
| 5/12/2011 22:42:01 | 22.989 | 5/8/2011 19:44:01 | 25.109 |
| 5/12/2011 23:12:01 | 22.802 | 5/8/2011 20:14:01 | 25.109 |
| 5/12/2011 23:42:01 | 22.427 | 5/8/2011 20:44:01 | 25.109 |
| 5/13/2011 00:12:01 | 22.239 | 5/8/2011 21:14:01 | 25.109 |
| 5/13/2011 00:42:01 | 21.926 | 5/8/2011 21:44:01 | 25.109 |
| 5/13/2011 01:12:01 | 21.926 | 5/8/2011 22:14:01 | 25.109 |
| 5/13/2011 01:42:01 | 21.864 | 5/8/2011 22:44:01 | 25.109 |
| 5/13/2011 02:12:01 | 21.989 | 5/8/2011 23:14:01 | 25.047 |
| 5/13/2011 02:42:01 | 21.739 | 5/8/2011 23:44:01 | 25.047 |
| 5/13/2011 03:12:01 | 21.739 | 5/9/2011 00:14:01 | 25.047 |
| 5/13/2011 03:42:01 | 21.426 | 5/9/2011 00:44:01 | 24.984 |
| 5/13/2011 04:12:01 | 21.051 | 5/9/2011 01:14:01 | 24.984 |
| 5/13/2011 04:42:01 | 20.988 | 5/9/2011 01:44:01 | 24.984 |
| 5/13/2011 05:12:01 | 20.988 | 5/9/2011 02:14:01 | 24.922 |
| 5/13/2011 05:42:01 | 20.550 | 5/9/2011 02:44:01 | 24.922 |
| 5/13/2011 06:12:01 | 20.237 | 5/9/2011 03:14:01 | 24.859 |
| 5/13/2011 06:42:01 | 20.050 | 5/9/2011 03:44:01 | 24.797 |
| 5/13/2011 07:12:01 | 20.613 | 5/9/2011 04:14:01 | 24.797 |
| 5/13/2011 07:42:01 | 21.676 | 5/9/2011 04:44:01 | 24.734 |
| 5/13/2011 08:12:01 | 23.427 | 5/9/2011 05:14:01 | 24.734 |
| 5/13/2011 08:42:01 | 24.865 | 5/9/2011 05:44:01 | 24.672 |
| 5/13/2011 09:12:01 | 26.240 | 5/9/2011 06:14:01 | 24.672 |
| 5/13/2011 09:42:01 | 27.427 | 5/9/2011 06:44:01 | 24.609 |
| 5/13/2011 10:12:01 | 28.614 | 5/9/2011 07:14:01 | 24.547 |
| 5/13/2011 10:42:01 | 29.675 | 5/9/2011 07:44:01 | 24.547 |
| 5/13/2011 11:12:01 | 29.988 | 5/9/2011 08:14:01 | 24.484 |
| 5/13/2011 11:42:01 | 29.551 | 5/9/2011 08:44:01 | 24.422 |
| 5/13/2011 12:12:01 | 29.863 | 5/9/2011 09:14:01 | 24.422 |
| 5/13/2011 12:42:01 | 31.111 | 5/9/2011 09:44:01 | 24.359 |
| 5/13/2011 13:12:01 | 29.426 | 5/9/2011 10:14:01 | 24.359 |
| 5/13/2011 13:42:01 | 30.300 | 5/9/2011 10:44:01 | 24.297 |
| 5/13/2011 14:12:01 | 29.301 | 5/9/2011 11:14:01 | 24.297 |
| 5/13/2011 14:42:01 | 30.112 | 5/9/2011 11:44:01 | 24.297 |
| 5/13/2011 15:12:01 | 28.926 | 5/9/2011 12:14:01 | 24.359 |
| 5/13/2011 15:42:01 | 27.802 | 5/9/2011 12:44:01 | 24.359 |
| 5/13/2011 16:12:01 | 26.865 | 5/9/2011 13:14:01 | 24.359 |
| 5/13/2011 16:42:01 | 25.927 | 5/9/2011 13:44:01 | 24.422 |
| 5/13/2011 17:12:01 | 25.178 | 5/9/2011 14:14:01 | 24.422 |

|                    |        |                    |        |
|--------------------|--------|--------------------|--------|
| 5/13/2011 17:42:01 | 24.365 | 5/9/2011 14:44:01  | 24.484 |
| 5/13/2011 18:12:01 | 23.552 | 5/9/2011 15:14:01  | 24.484 |
| 5/13/2011 18:42:01 | 22.802 | 5/9/2011 15:44:01  | 24.547 |
| 5/13/2011 19:12:01 | 22.051 | 5/9/2011 16:14:01  | 24.547 |
| 5/13/2011 19:42:01 | 21.614 | 5/9/2011 16:44:01  | 24.609 |
| 5/13/2011 20:12:01 | 21.301 | 5/9/2011 17:14:01  | 24.609 |
| 5/13/2011 20:42:01 | 21.113 | 5/9/2011 17:44:01  | 24.609 |
| 5/13/2011 21:12:01 | 21.238 | 5/9/2011 18:14:01  | 24.672 |
| 5/13/2011 21:42:01 | 21.238 | 5/9/2011 18:44:01  | 24.672 |
| 5/13/2011 22:12:01 | 21.301 | 5/9/2011 19:14:01  | 24.672 |
| 5/13/2011 22:42:01 | 21.238 | 5/9/2011 19:44:01  | 24.672 |
| 5/13/2011 23:12:01 | 21.426 | 5/9/2011 20:14:01  | 24.672 |
| 5/13/2011 23:42:01 | 21.801 | 5/9/2011 20:44:01  | 24.672 |
| 5/14/2011 00:12:01 | 21.864 | 5/9/2011 21:14:01  | 24.672 |
| 5/14/2011 00:42:01 | 21.926 | 5/9/2011 21:44:01  | 24.672 |
| 5/14/2011 01:12:01 | 21.614 | 5/9/2011 22:14:01  | 24.672 |
| 5/14/2011 01:42:01 | 21.614 | 5/9/2011 22:44:01  | 24.672 |
| 5/14/2011 02:12:01 | 21.488 | 5/9/2011 23:14:01  | 24.609 |
| 5/14/2011 02:42:01 | 21.426 | 5/9/2011 23:44:01  | 24.609 |
| 5/14/2011 03:12:01 | 21.614 | 5/10/2011 00:14:01 | 24.547 |
| 5/14/2011 03:42:01 | 21.864 | 5/10/2011 00:44:01 | 24.547 |
| 5/14/2011 04:12:01 | 22.302 | 5/10/2011 01:14:01 | 24.547 |
| 5/14/2011 04:42:01 | 22.176 | 5/10/2011 01:44:01 | 24.484 |
| 5/14/2011 05:12:01 | 22.239 | 5/10/2011 02:14:01 | 24.484 |
| 5/14/2011 05:42:01 | 22.051 | 5/10/2011 02:44:01 | 24.484 |
| 5/14/2011 06:12:01 | 21.051 | 5/10/2011 03:14:01 | 24.422 |
| 5/14/2011 06:42:01 | 20.550 | 5/10/2011 03:44:01 | 24.422 |
| 5/14/2011 07:12:01 | 21.363 | 5/10/2011 04:14:01 | 24.359 |
| 5/14/2011 07:42:01 | 22.614 | 5/10/2011 04:44:01 | 24.359 |
| 5/14/2011 08:12:01 | 23.865 | 5/10/2011 05:14:01 | 24.359 |
| 5/14/2011 08:42:01 | 24.427 | 5/10/2011 05:44:01 | 24.297 |
| 5/14/2011 09:12:01 | 24.677 | 5/10/2011 06:14:01 | 24.297 |
| 5/14/2011 09:42:01 | 26.240 | 5/10/2011 06:44:01 | 24.234 |
| 5/14/2011 10:12:01 | 27.552 | 5/10/2011 07:14:01 | 24.234 |
| 5/14/2011 10:42:01 | 28.739 | 5/10/2011 07:44:01 | 24.172 |
| 5/14/2011 11:12:01 | 29.800 | 5/10/2011 08:14:01 | 24.172 |
| 5/14/2011 11:42:01 | 30.362 | 5/10/2011 08:44:01 | 24.172 |
| 5/14/2011 12:12:01 | 30.924 | 5/10/2011 09:14:01 | 24.109 |
| 5/14/2011 12:42:01 | 31.111 | 5/10/2011 09:44:01 | 24.109 |
| 5/14/2011 13:12:01 | 31.174 | 5/10/2011 10:14:01 | 24.109 |
| 5/14/2011 13:42:01 | 31.486 | 5/10/2011 10:44:01 | 24.109 |
| 5/14/2011 14:12:01 | 31.486 | 5/10/2011 11:14:01 | 24.109 |
| 5/14/2011 14:42:01 | 31.923 | 5/10/2011 11:44:01 | 24.109 |
| 5/14/2011 15:12:01 | 29.613 | 5/10/2011 12:14:01 | 24.109 |
| 5/14/2011 15:42:01 | 28.302 | 5/10/2011 12:44:01 | 24.172 |
| 5/14/2011 16:12:01 | 27.115 | 5/10/2011 13:14:01 | 24.172 |
| 5/14/2011 16:42:01 | 26.052 | 5/10/2011 13:44:01 | 24.234 |
| 5/14/2011 17:12:01 | 25.052 | 5/10/2011 14:14:01 | 24.234 |
| 5/14/2011 17:42:01 | 24.427 | 5/10/2011 14:44:01 | 24.297 |
| 5/14/2011 18:12:01 | 23.114 | 5/10/2011 15:14:01 | 24.359 |

|                    |        |                    |        |
|--------------------|--------|--------------------|--------|
| 5/14/2011 18:42:01 | 22.239 | 5/10/2011 15:44:01 | 24.359 |
| 5/14/2011 19:12:01 | 21.551 | 5/10/2011 16:14:01 | 24.422 |
| 5/14/2011 19:42:01 | 21.051 | 5/10/2011 16:44:01 | 24.422 |
| 5/14/2011 20:12:01 | 20.487 | 5/10/2011 17:14:01 | 24.484 |
| 5/14/2011 20:42:01 | 20.112 | 5/10/2011 17:44:01 | 24.484 |
| 5/14/2011 21:12:01 | 19.799 | 5/10/2011 18:14:01 | 24.547 |
| 5/14/2011 21:42:01 | 19.549 | 5/10/2011 18:44:01 | 24.547 |
| 5/14/2011 22:12:01 | 19.424 | 5/10/2011 19:14:01 | 24.547 |
| 5/14/2011 22:42:01 | 19.361 | 5/10/2011 19:44:01 | 24.547 |
| 5/14/2011 23:12:01 | 19.674 | 5/10/2011 20:14:01 | 24.609 |
| 5/14/2011 23:42:01 | 19.674 | 5/10/2011 20:44:01 | 24.609 |
| 5/15/2011 00:12:01 | 19.862 | 5/10/2011 21:14:01 | 24.609 |
| 5/15/2011 00:42:01 | 19.611 | 5/10/2011 21:44:01 | 24.609 |
| 5/15/2011 01:12:01 | 19.361 | 5/10/2011 22:14:01 | 24.609 |
| 5/15/2011 01:42:01 | 19.236 | 5/10/2011 22:44:01 | 24.547 |
| 5/15/2011 02:12:01 | 19.173 | 5/10/2011 23:14:01 | 24.547 |
| 5/15/2011 02:42:01 | 18.986 | 5/10/2011 23:44:01 | 24.547 |
| 5/15/2011 03:12:01 | 18.610 | 5/11/2011 00:14:01 | 24.547 |
| 5/15/2011 03:42:01 | 18.422 | 5/11/2011 00:44:01 | 24.547 |
| 5/15/2011 04:12:01 | 18.548 | 5/11/2011 01:14:01 | 24.484 |
| 5/15/2011 04:42:01 | 18.735 | 5/11/2011 01:44:01 | 24.484 |
| 5/15/2011 05:12:01 | 18.485 | 5/11/2011 02:14:01 | 24.484 |
| 5/15/2011 05:42:01 | 18.235 | 5/11/2011 02:44:01 | 24.484 |
| 5/15/2011 06:12:01 | 17.984 | 5/11/2011 03:14:01 | 24.422 |
| 5/15/2011 06:42:01 | 17.859 | 5/11/2011 03:44:01 | 24.422 |
| 5/15/2011 07:12:01 | 18.422 | 5/11/2011 04:14:01 | 24.422 |
| 5/15/2011 07:42:01 | 19.737 | 5/11/2011 04:44:01 | 24.359 |
| 5/15/2011 08:12:01 | 21.864 | 5/11/2011 05:14:01 | 24.359 |
| 5/15/2011 08:42:01 | 23.615 | 5/11/2011 05:44:01 | 24.359 |
| 5/15/2011 09:12:01 | 25.178 | 5/11/2011 06:14:01 | 24.297 |
| 5/15/2011 09:42:01 | 26.365 | 5/11/2011 06:44:01 | 24.297 |
| 5/15/2011 10:12:01 | 27.677 | 5/11/2011 07:14:01 | 24.297 |
| 5/15/2011 10:42:01 | 28.801 | 5/11/2011 07:44:01 | 24.234 |
| 5/15/2011 11:12:01 | 29.426 | 5/11/2011 08:14:01 | 24.234 |
| 5/15/2011 11:42:01 | 30.300 | 5/11/2011 08:44:01 | 24.234 |
| 5/15/2011 12:12:01 | 30.924 | 5/11/2011 09:14:01 | 24.172 |
| 5/15/2011 12:42:01 | 31.111 | 5/11/2011 09:44:01 | 24.172 |
| 5/15/2011 13:12:01 | 31.236 | 5/11/2011 10:14:01 | 24.172 |
| 5/15/2011 13:42:01 | 31.361 | 5/11/2011 10:44:01 | 24.172 |
| 5/15/2011 14:12:01 | 31.236 | 5/11/2011 11:14:01 | 24.172 |
| 5/15/2011 14:42:01 | 31.049 | 5/11/2011 11:44:01 | 24.172 |
| 5/15/2011 15:12:01 | 29.363 | 5/11/2011 12:14:01 | 24.234 |
| 5/15/2011 15:42:01 | 27.927 | 5/11/2011 12:44:01 | 24.234 |
| 5/15/2011 16:12:01 | 26.552 | 5/11/2011 13:14:01 | 24.234 |
| 5/15/2011 16:42:01 | 25.490 | 5/11/2011 13:44:01 | 24.297 |
| 5/15/2011 17:12:01 | 24.615 | 5/11/2011 14:14:01 | 24.297 |
| 5/15/2011 17:42:01 | 23.615 | 5/11/2011 14:44:01 | 24.359 |
| 5/15/2011 18:12:01 | 22.802 | 5/11/2011 15:14:01 | 24.359 |
| 5/15/2011 18:42:01 | 21.926 | 5/11/2011 15:44:01 | 24.422 |
| 5/15/2011 19:12:01 | 21.238 | 5/11/2011 16:14:01 | 24.422 |

|                    |        |                    |        |
|--------------------|--------|--------------------|--------|
| 5/15/2011 19:42:01 | 20.613 | 5/11/2011 16:44:01 | 24.422 |
| 5/15/2011 20:12:01 | 20.112 | 5/11/2011 17:14:01 | 24.484 |
| 5/15/2011 20:42:01 | 19.674 | 5/11/2011 17:44:01 | 24.484 |
| 5/15/2011 21:12:01 | 19.236 | 5/11/2011 18:14:01 | 24.547 |
| 5/15/2011 21:42:01 | 18.923 | 5/11/2011 18:44:01 | 24.547 |
| 5/15/2011 22:12:01 | 18.735 | 5/11/2011 19:14:01 | 24.547 |
| 5/15/2011 22:42:01 | 18.548 | 5/11/2011 19:44:01 | 24.547 |
| 5/15/2011 23:12:01 | 18.422 | 5/11/2011 20:14:01 | 24.547 |
| 5/15/2011 23:42:01 | 18.548 | 5/11/2011 20:44:01 | 24.547 |
| 5/16/2011 00:12:01 | 18.735 | 5/11/2011 21:14:01 | 24.547 |
| 5/16/2011 00:42:01 | 18.548 | 5/11/2011 21:44:01 | 24.547 |
| 5/16/2011 01:12:01 | 18.360 | 5/11/2011 22:14:01 | 24.547 |
| 5/16/2011 01:42:01 | 17.984 | 5/11/2011 22:44:01 | 24.547 |
| 5/16/2011 02:12:01 | 17.734 | 5/11/2011 23:14:01 | 24.547 |
| 5/16/2011 02:42:01 | 17.546 | 5/11/2011 23:44:01 | 24.547 |
| 5/16/2011 03:12:01 | 17.358 | 5/12/2011 00:14:01 | 24.484 |
| 5/16/2011 03:42:01 | 17.170 | 5/12/2011 00:44:01 | 24.484 |
| 5/16/2011 04:12:01 | 17.108 | 5/12/2011 01:14:01 | 24.484 |
| 5/16/2011 04:42:01 | 16.982 | 5/12/2011 01:44:01 | 24.484 |
| 5/16/2011 05:12:01 | 16.732 | 5/12/2011 02:14:01 | 24.422 |
| 5/16/2011 05:42:01 | 16.607 | 5/12/2011 02:44:01 | 24.422 |
| 5/16/2011 06:12:01 | 16.419 | 5/12/2011 03:14:01 | 24.422 |
| 5/16/2011 06:42:01 | 16.419 | 5/12/2011 03:44:01 | 24.359 |
| 5/16/2011 07:12:01 | 17.108 | 5/12/2011 04:14:01 | 24.359 |
| 5/16/2011 07:42:01 | 18.673 | 5/12/2011 04:44:01 | 24.359 |
| 5/16/2011 08:12:01 | 20.613 | 5/12/2011 05:14:01 | 24.297 |
| 5/16/2011 08:42:01 | 22.739 | 5/12/2011 05:44:01 | 24.297 |
| 5/16/2011 09:12:01 | 24.115 | 5/12/2011 06:14:01 | 24.234 |
| 5/16/2011 09:42:01 | 25.490 | 5/12/2011 06:44:01 | 24.234 |
| 5/16/2011 10:12:01 | 26.927 | 5/12/2011 07:14:01 | 24.234 |
| 5/16/2011 10:42:01 | 27.989 | 5/12/2011 07:44:01 | 24.172 |
| 5/16/2011 11:12:01 | 29.051 | 5/12/2011 08:14:01 | 24.172 |
| 5/16/2011 11:42:01 | 29.863 | 5/12/2011 08:44:01 | 24.172 |
| 5/16/2011 12:12:01 | 30.425 | 5/12/2011 09:14:01 | 24.172 |
| 5/16/2011 12:42:01 | 30.674 | 5/12/2011 09:44:01 | 24.109 |
| 5/16/2011 13:12:01 | 30.862 | 5/12/2011 10:14:01 | 24.109 |
| 5/16/2011 13:42:01 | 31.111 | 5/12/2011 10:44:01 | 24.109 |
| 5/16/2011 14:12:01 | 31.236 | 5/12/2011 11:14:01 | 24.109 |
| 5/16/2011 14:42:01 | 30.862 | 5/12/2011 11:44:01 | 24.109 |
| 5/16/2011 15:12:01 | 29.176 | 5/12/2011 12:14:01 | 24.172 |
| 5/16/2011 15:42:01 | 27.739 | 5/12/2011 12:44:01 | 24.172 |
| 5/16/2011 16:12:01 | 26.302 | 5/12/2011 13:14:01 | 24.234 |
| 5/16/2011 16:42:01 | 25.115 | 5/12/2011 13:44:01 | 24.234 |
| 5/16/2011 17:12:01 | 24.240 | 5/12/2011 14:14:01 | 24.297 |
| 5/16/2011 17:42:01 | 23.302 | 5/12/2011 14:44:01 | 24.297 |
| 5/16/2011 18:12:01 | 22.302 | 5/12/2011 15:14:01 | 24.359 |
| 5/16/2011 18:42:01 | 21.363 | 5/12/2011 15:44:01 | 24.359 |
| 5/16/2011 19:12:01 | 20.487 | 5/12/2011 16:14:01 | 24.422 |
| 5/16/2011 19:42:01 | 19.799 | 5/12/2011 16:44:01 | 24.422 |
| 5/16/2011 20:12:01 | 19.299 | 5/12/2011 17:14:01 | 24.484 |

|                    |        |                    |        |
|--------------------|--------|--------------------|--------|
| 5/16/2011 20:42:01 | 18.860 | 5/12/2011 17:44:01 | 24.484 |
| 5/16/2011 21:12:01 | 18.422 | 5/12/2011 18:14:01 | 24.484 |
| 5/16/2011 21:42:01 | 18.047 | 5/12/2011 18:44:01 | 24.547 |
| 5/16/2011 22:12:01 | 17.796 | 5/12/2011 19:14:01 | 24.547 |
| 5/16/2011 22:42:01 | 17.609 | 5/12/2011 19:44:01 | 24.547 |
| 5/16/2011 23:12:01 | 17.358 | 5/12/2011 20:14:01 | 24.547 |
| 5/16/2011 23:42:01 | 17.108 | 5/12/2011 20:44:01 | 24.609 |
| 5/17/2011 00:12:01 | 17.170 | 5/12/2011 21:14:01 | 24.609 |
| 5/17/2011 00:42:01 | 17.108 | 5/12/2011 21:44:01 | 24.609 |
| 5/17/2011 01:12:01 | 16.982 | 5/12/2011 22:14:01 | 24.609 |
| 5/17/2011 01:42:01 | 16.920 | 5/12/2011 22:44:01 | 24.609 |
| 5/17/2011 02:12:01 | 16.669 | 5/12/2011 23:14:01 | 24.609 |
| 5/17/2011 02:42:01 | 16.544 | 5/12/2011 23:44:01 | 24.609 |
| 5/17/2011 03:12:01 | 16.356 | 5/13/2011 00:14:01 | 24.609 |
| 5/17/2011 03:42:01 | 16.231 | 5/13/2011 00:44:01 | 24.547 |
| 5/17/2011 04:12:01 | 15.981 | 5/13/2011 01:14:01 | 24.547 |
| 5/17/2011 04:42:01 | 15.730 | 5/13/2011 01:44:01 | 24.547 |
| 5/17/2011 05:12:01 | 15.667 | 5/13/2011 02:14:01 | 24.547 |
| 5/17/2011 05:42:01 | 15.605 | 5/13/2011 02:44:01 | 24.547 |
| 5/17/2011 06:12:01 | 15.354 | 5/13/2011 03:14:01 | 24.547 |
| 5/17/2011 06:42:01 | 15.417 | 5/13/2011 03:44:01 | 24.547 |
| 5/17/2011 07:12:01 | 16.043 | 5/13/2011 04:14:01 | 24.547 |
| 5/17/2011 07:42:01 | 17.546 | 5/13/2011 04:44:01 | 24.484 |
| 5/17/2011 08:12:01 | 19.486 | 5/13/2011 05:14:01 | 24.484 |
| 5/17/2011 08:42:01 | 21.801 | 5/13/2011 05:44:01 | 24.484 |
| 5/17/2011 09:12:01 | 23.802 | 5/13/2011 06:14:01 | 24.484 |
| 5/17/2011 09:42:01 | 25.115 | 5/13/2011 06:44:01 | 24.484 |
| 5/17/2011 10:12:01 | 26.927 | 5/13/2011 07:14:01 | 24.422 |
| 5/17/2011 10:42:01 | 28.114 | 5/13/2011 07:44:01 | 24.422 |
| 5/17/2011 11:12:01 | 29.176 | 5/13/2011 08:14:01 | 24.422 |
| 5/17/2011 11:42:01 | 29.988 | 5/13/2011 08:44:01 | 24.422 |
| 5/17/2011 12:12:01 | 30.487 | 5/13/2011 09:14:01 | 24.359 |
| 5/17/2011 12:42:01 | 30.612 | 5/13/2011 09:44:01 | 24.359 |
| 5/17/2011 13:12:01 | 30.924 | 5/13/2011 10:14:01 | 24.359 |
| 5/17/2011 13:42:01 | 31.174 | 5/13/2011 10:44:01 | 24.359 |
| 5/17/2011 14:12:01 | 30.924 | 5/13/2011 11:14:01 | 24.359 |
| 5/17/2011 14:42:01 | 30.362 | 5/13/2011 11:44:01 | 24.359 |
| 5/17/2011 15:12:01 | 28.364 | 5/13/2011 12:14:01 | 24.422 |
| 5/17/2011 15:42:01 | 27.052 | 5/13/2011 12:44:01 | 24.422 |
| 5/17/2011 16:12:01 | 25.740 | 5/13/2011 13:14:01 | 24.422 |
| 5/17/2011 16:42:01 | 24.427 | 5/13/2011 13:44:01 | 24.484 |
| 5/17/2011 17:12:01 | 23.552 | 5/13/2011 14:14:01 | 24.484 |
| 5/17/2011 17:42:01 | 22.552 | 5/13/2011 14:44:01 | 24.547 |
| 5/17/2011 18:12:01 | 21.488 | 5/13/2011 15:14:01 | 24.547 |
| 5/17/2011 18:42:01 | 20.487 | 5/13/2011 15:44:01 | 24.609 |
| 5/17/2011 19:12:01 | 19.486 | 5/13/2011 16:14:01 | 24.609 |
| 5/17/2011 19:42:01 | 18.798 | 5/13/2011 16:44:01 | 24.609 |
| 5/17/2011 20:12:01 | 18.172 | 5/13/2011 17:14:01 | 24.672 |
| 5/17/2011 20:42:01 | 17.796 | 5/13/2011 17:44:01 | 24.672 |
| 5/17/2011 21:12:01 | 17.546 | 5/13/2011 18:14:01 | 24.672 |

|                    |        |                    |        |
|--------------------|--------|--------------------|--------|
| 5/17/2011 21:42:01 | 17.296 | 5/13/2011 18:44:01 | 24.672 |
| 5/17/2011 22:12:01 | 17.108 | 5/13/2011 19:14:01 | 24.672 |
| 5/17/2011 22:42:01 | 16.920 | 5/13/2011 19:44:01 | 24.734 |
| 5/17/2011 23:12:01 | 16.795 | 5/13/2011 20:14:01 | 24.734 |
| 5/17/2011 23:42:01 | 16.544 | 5/13/2011 20:44:01 | 24.734 |
| 5/18/2011 00:12:01 | 16.419 | 5/13/2011 21:14:01 | 24.672 |
| 5/18/2011 00:42:01 | 16.294 | 5/13/2011 21:44:01 | 24.672 |
| 5/18/2011 01:12:01 | 16.482 | 5/13/2011 22:14:01 | 24.672 |
| 5/18/2011 01:42:01 | 16.419 | 5/13/2011 22:44:01 | 24.672 |
| 5/18/2011 02:12:01 | 16.106 | 5/13/2011 23:14:01 | 24.672 |
| 5/18/2011 02:42:01 | 15.918 | 5/13/2011 23:44:01 | 24.672 |
| 5/18/2011 03:12:01 | 15.918 | 5/14/2011 00:14:01 | 24.609 |
| 5/18/2011 03:42:01 | 15.730 | 5/14/2011 00:44:01 | 24.609 |
| 5/18/2011 04:12:01 | 15.542 | 5/14/2011 01:14:01 | 24.609 |
| 5/18/2011 04:42:01 | 15.605 | 5/14/2011 01:44:01 | 24.609 |
| 5/18/2011 05:12:01 | 15.667 | 5/14/2011 02:14:01 | 24.609 |
| 5/18/2011 05:42:01 | 15.542 | 5/14/2011 02:44:01 | 24.547 |
| 5/18/2011 06:12:01 | 15.605 | 5/14/2011 03:14:01 | 24.547 |
| 5/18/2011 06:42:01 | 15.542 | 5/14/2011 03:44:01 | 24.547 |
| 5/18/2011 07:12:01 | 16.294 | 5/14/2011 04:14:01 | 24.547 |
| 5/18/2011 07:42:01 | 17.796 | 5/14/2011 04:44:01 | 24.547 |
| 5/18/2011 08:12:01 | 20.237 | 5/14/2011 05:14:01 | 24.547 |
| 5/18/2011 08:42:01 | 23.052 | 5/14/2011 05:44:01 | 24.484 |
| 5/18/2011 09:12:01 | 24.552 | 5/14/2011 06:14:01 | 24.484 |
| 5/18/2011 09:42:01 | 25.802 | 5/14/2011 06:44:01 | 24.484 |
| 5/18/2011 10:12:01 | 27.177 | 5/14/2011 07:14:01 | 24.484 |
| 5/18/2011 10:42:01 | 28.052 | 5/14/2011 07:44:01 | 24.484 |
| 5/18/2011 11:12:01 | 29.176 | 5/14/2011 08:14:01 | 24.484 |
| 5/18/2011 11:42:01 | 29.613 | 5/14/2011 08:44:01 | 24.422 |
| 5/18/2011 12:12:01 | 30.050 | 5/14/2011 09:14:01 | 24.422 |
| 5/18/2011 12:42:01 | 30.237 | 5/14/2011 09:44:01 | 24.422 |
| 5/18/2011 13:12:01 | 30.549 | 5/14/2011 10:14:01 | 24.422 |
| 5/18/2011 13:42:01 | 30.674 | 5/14/2011 10:44:01 | 24.422 |
| 5/18/2011 14:12:01 | 30.737 | 5/14/2011 11:14:01 | 24.422 |
| 5/18/2011 14:42:01 | 30.175 | 5/14/2011 11:44:01 | 24.422 |
| 5/18/2011 15:12:01 | 28.989 | 5/14/2011 12:14:01 | 24.422 |
| 5/18/2011 15:42:01 | 27.427 | 5/14/2011 12:44:01 | 24.484 |
| 5/18/2011 16:12:01 | 26.115 | 5/14/2011 13:14:01 | 24.484 |
| 5/18/2011 16:42:01 | 24.990 | 5/14/2011 13:44:01 | 24.484 |
| 5/18/2011 17:12:01 | 23.927 | 5/14/2011 14:14:01 | 24.547 |
| 5/18/2011 17:42:01 | 22.677 | 5/14/2011 14:44:01 | 24.547 |
| 5/18/2011 18:12:01 | 21.614 | 5/14/2011 15:14:01 | 24.547 |
| 5/18/2011 18:42:01 | 20.675 | 5/14/2011 15:44:01 | 24.609 |
| 5/18/2011 19:12:01 | 19.987 | 5/14/2011 16:14:01 | 24.609 |
| 5/18/2011 19:42:01 | 19.486 | 5/14/2011 16:44:01 | 24.609 |
| 5/18/2011 20:12:01 | 18.923 | 5/14/2011 17:14:01 | 24.609 |
| 5/18/2011 20:42:01 | 18.485 | 5/14/2011 17:44:01 | 24.672 |
| 5/18/2011 21:12:01 | 18.047 | 5/14/2011 18:14:01 | 24.672 |
| 5/18/2011 21:42:01 | 17.796 | 5/14/2011 18:44:01 | 24.672 |
| 5/18/2011 22:12:01 | 17.671 | 5/14/2011 19:14:01 | 24.672 |

|                    |        |                    |        |
|--------------------|--------|--------------------|--------|
| 5/18/2011 22:42:01 | 17.483 | 5/14/2011 19:44:01 | 24.672 |
| 5/18/2011 23:12:01 | 17.358 | 5/14/2011 20:14:01 | 24.672 |
| 5/18/2011 23:42:01 | 17.546 | 5/14/2011 20:44:01 | 24.672 |
| 5/19/2011 00:12:01 | 18.360 | 5/14/2011 21:14:01 | 24.672 |
| 5/19/2011 00:42:01 | 18.172 | 5/14/2011 21:44:01 | 24.672 |
| 5/19/2011 01:12:01 | 17.796 | 5/14/2011 22:14:01 | 24.672 |
| 5/19/2011 01:42:01 | 17.483 | 5/14/2011 22:44:01 | 24.609 |
| 5/19/2011 02:12:01 | 17.296 | 5/14/2011 23:14:01 | 24.609 |
| 5/19/2011 02:42:01 | 17.170 | 5/14/2011 23:44:01 | 24.609 |
| 5/19/2011 03:12:01 | 16.920 | 5/15/2011 00:14:01 | 24.547 |
| 5/19/2011 03:42:01 | 16.795 | 5/15/2011 00:44:01 | 24.547 |
| 5/19/2011 04:12:01 | 16.669 | 5/15/2011 01:14:01 | 24.547 |
| 5/19/2011 04:42:01 | 16.482 | 5/15/2011 01:44:01 | 24.484 |
| 5/19/2011 05:12:01 | 16.231 | 5/15/2011 02:14:01 | 24.484 |
| 5/19/2011 05:42:01 | 16.356 | 5/15/2011 02:44:01 | 24.422 |
| 5/19/2011 06:12:01 | 16.294 | 5/15/2011 03:14:01 | 24.422 |
| 5/19/2011 06:42:01 | 16.231 | 5/15/2011 03:44:01 | 24.422 |
| 5/19/2011 07:12:01 | 17.045 | 5/15/2011 04:14:01 | 24.359 |
| 5/19/2011 07:42:01 | 18.485 | 5/15/2011 04:44:01 | 24.359 |
| 5/19/2011 08:12:01 | 20.237 | 5/15/2011 05:14:01 | 24.297 |
| 5/19/2011 08:42:01 | 22.114 | 5/15/2011 05:44:01 | 24.297 |
| 5/19/2011 09:12:01 | 24.052 | 5/15/2011 06:14:01 | 24.297 |
| 5/19/2011 09:42:01 | 25.490 | 5/15/2011 06:44:01 | 24.234 |
| 5/19/2011 10:12:01 | 26.865 | 5/15/2011 07:14:01 | 24.234 |
| 5/19/2011 10:42:01 | 27.739 | 5/15/2011 07:44:01 | 24.172 |
| 5/19/2011 11:12:01 | 28.926 | 5/15/2011 08:14:01 | 24.172 |
| 5/19/2011 11:42:01 | 29.488 | 5/15/2011 08:44:01 | 24.109 |
| 5/19/2011 12:12:01 | 29.925 | 5/15/2011 09:14:01 | 24.109 |
| 5/19/2011 12:42:01 | 30.300 | 5/15/2011 09:44:01 | 24.109 |
| 5/19/2011 13:12:01 | 30.549 | 5/15/2011 10:14:01 | 24.109 |
| 5/19/2011 13:42:01 | 30.799 | 5/15/2011 10:44:01 | 24.047 |
| 5/19/2011 14:12:01 | 30.862 | 5/15/2011 11:14:01 | 24.109 |
| 5/19/2011 14:42:01 | 29.925 | 5/15/2011 11:44:01 | 24.109 |
| 5/19/2011 15:12:01 | 28.739 | 5/15/2011 12:14:01 | 24.109 |
| 5/19/2011 15:42:01 | 27.052 | 5/15/2011 12:44:01 | 24.109 |
| 5/19/2011 16:12:01 | 25.490 | 5/15/2011 13:14:01 | 24.172 |
| 5/19/2011 16:42:01 | 24.490 | 5/15/2011 13:44:01 | 24.172 |
| 5/19/2011 17:12:01 | 23.427 | 5/15/2011 14:14:01 | 24.172 |
| 5/19/2011 17:42:01 | 22.427 | 5/15/2011 14:44:01 | 24.234 |
| 5/19/2011 18:12:01 | 21.301 | 5/15/2011 15:14:01 | 24.234 |
| 5/19/2011 18:42:01 | 20.300 | 5/15/2011 15:44:01 | 24.234 |
| 5/19/2011 19:12:01 | 19.424 | 5/15/2011 16:14:01 | 24.297 |
| 5/19/2011 19:42:01 | 18.735 | 5/15/2011 16:44:01 | 24.297 |
| 5/19/2011 20:12:01 | 18.109 | 5/15/2011 17:14:01 | 24.359 |
| 5/19/2011 20:42:01 | 17.609 | 5/15/2011 17:44:01 | 24.359 |
| 5/19/2011 21:12:01 | 17.233 | 5/15/2011 18:14:01 | 24.359 |
| 5/19/2011 21:42:01 | 16.920 | 5/15/2011 18:44:01 | 24.359 |
| 5/19/2011 22:12:01 | 16.607 | 5/15/2011 19:14:01 | 24.422 |
| 5/19/2011 22:42:01 | 16.482 | 5/15/2011 19:44:01 | 24.422 |
| 5/19/2011 23:12:01 | 16.419 | 5/15/2011 20:14:01 | 24.422 |



|                    |        |                    |        |
|--------------------|--------|--------------------|--------|
| 5/19/2011 23:42:01 | 16.231 | 5/15/2011 20:44:01 | 24.422 |
| 5/20/2011 00:12:01 | 16.168 | 5/15/2011 21:14:01 | 24.422 |
| 5/20/2011 00:42:01 | 16.106 | 5/15/2011 21:44:01 | 24.422 |
| 5/20/2011 01:12:01 | 16.607 | 5/15/2011 22:14:01 | 24.359 |
| 5/20/2011 01:42:01 | 16.669 | 5/15/2011 22:44:01 | 24.359 |
| 5/20/2011 02:12:01 | 16.419 | 5/15/2011 23:14:01 | 24.359 |
| 5/20/2011 02:42:01 | 16.482 | 5/15/2011 23:44:01 | 24.359 |
| 5/20/2011 03:12:01 | 16.231 | 5/16/2011 00:14:01 | 24.297 |
| 5/20/2011 03:42:01 | 16.168 | 5/16/2011 00:44:01 | 24.297 |
| 5/20/2011 04:12:01 | 16.043 | 5/16/2011 01:14:01 | 24.234 |
| 5/20/2011 04:42:01 | 16.043 | 5/16/2011 01:44:01 | 24.234 |
| 5/20/2011 05:12:01 | 15.981 | 5/16/2011 02:14:01 | 24.234 |
| 5/20/2011 05:42:01 | 15.793 | 5/16/2011 02:44:01 | 24.172 |
| 5/20/2011 06:12:01 | 15.480 | 5/16/2011 03:14:01 | 24.172 |
| 5/20/2011 06:42:01 | 15.480 | 5/16/2011 03:44:01 | 24.109 |
| 5/20/2011 07:12:01 | 16.168 | 5/16/2011 04:14:01 | 24.109 |
| 5/20/2011 07:42:01 | 17.734 | 5/16/2011 04:44:01 | 24.047 |
| 5/20/2011 08:12:01 | 19.674 | 5/16/2011 05:14:01 | 24.047 |
| 5/20/2011 08:42:01 | 21.864 | 5/16/2011 05:44:01 | 23.984 |
| 5/20/2011 09:12:01 | 24.177 | 5/16/2011 06:14:01 | 23.984 |
| 5/20/2011 09:42:01 | 25.677 | 5/16/2011 06:44:01 | 23.922 |
| 5/20/2011 10:12:01 | 27.365 | 5/16/2011 07:14:01 | 23.922 |
| 5/20/2011 10:42:01 | 28.551 | 5/16/2011 07:44:01 | 23.922 |
| 5/20/2011 11:12:01 | 29.613 | 5/16/2011 08:14:01 | 23.859 |
| 5/20/2011 11:42:01 | 30.175 | 5/16/2011 08:44:01 | 23.859 |
| 5/20/2011 12:12:01 | 30.799 | 5/16/2011 09:14:01 | 23.797 |
| 5/20/2011 12:42:01 | 30.986 | 5/16/2011 09:44:01 | 23.797 |
| 5/20/2011 13:12:01 | 31.049 | 5/16/2011 10:14:01 | 23.797 |
| 5/20/2011 13:42:01 | 31.049 | 5/16/2011 10:44:01 | 23.797 |
| 5/20/2011 14:12:01 | 31.361 | 5/16/2011 11:14:01 | 23.734 |
| 5/20/2011 14:42:01 | 30.674 | 5/16/2011 11:44:01 | 23.797 |
| 5/20/2011 15:12:01 | 29.675 | 5/16/2011 12:14:01 | 23.797 |
| 5/20/2011 15:42:01 | 27.927 | 5/16/2011 12:44:01 | 23.797 |
| 5/20/2011 16:12:01 | 26.490 | 5/16/2011 13:14:01 | 23.859 |
| 5/20/2011 16:42:01 | 25.178 | 5/16/2011 13:44:01 | 23.859 |
| 5/20/2011 17:12:01 | 23.865 | 5/16/2011 14:14:01 | 23.859 |
| 5/20/2011 17:42:01 | 22.864 | 5/16/2011 14:44:01 | 23.922 |
| 5/20/2011 18:12:01 | 21.676 | 5/16/2011 15:14:01 | 23.922 |
| 5/20/2011 18:42:01 | 20.550 | 5/16/2011 15:44:01 | 23.984 |
| 5/20/2011 19:12:01 | 19.611 | 5/16/2011 16:14:01 | 23.984 |
| 5/20/2011 19:42:01 | 18.860 | 5/16/2011 16:44:01 | 24.047 |
| 5/20/2011 20:12:01 | 18.172 | 5/16/2011 17:14:01 | 24.047 |
| 5/20/2011 20:42:01 | 17.671 | 5/16/2011 17:44:01 | 24.047 |
| 5/20/2011 21:12:01 | 17.358 | 5/16/2011 18:14:01 | 24.047 |
| 5/20/2011 21:42:01 | 17.358 | 5/16/2011 18:44:01 | 24.109 |
| 5/20/2011 22:12:01 | 17.296 | 5/16/2011 19:14:01 | 24.109 |
| 5/20/2011 22:42:01 | 17.296 | 5/16/2011 19:44:01 | 24.109 |
| 5/20/2011 23:12:01 | 17.296 | 5/16/2011 20:14:01 | 24.109 |
| 5/20/2011 23:42:01 | 18.047 | 5/16/2011 20:44:01 | 24.109 |
| 5/21/2011 00:12:01 | 18.047 | 5/16/2011 21:14:01 | 24.109 |

|                    |        |                    |        |
|--------------------|--------|--------------------|--------|
| 5/21/2011 00:42:01 | 18.109 | 5/16/2011 21:44:01 | 24.109 |
| 5/21/2011 01:12:01 | 17.859 | 5/16/2011 22:14:01 | 24.109 |
| 5/21/2011 01:42:01 | 17.609 | 5/16/2011 22:44:01 | 24.109 |
| 5/21/2011 02:12:01 | 17.233 | 5/16/2011 23:14:01 | 24.047 |
| 5/21/2011 02:42:01 | 17.045 | 5/16/2011 23:44:01 | 24.047 |
| 5/21/2011 03:12:01 | 16.857 | 5/17/2011 00:14:01 | 24.047 |
| 5/21/2011 03:42:01 | 16.857 | 5/17/2011 00:44:01 | 23.984 |
| 5/21/2011 04:12:01 | 16.482 | 5/17/2011 01:14:01 | 23.984 |
| 5/21/2011 04:42:01 | 16.294 | 5/17/2011 01:44:01 | 23.922 |
| 5/21/2011 05:12:01 | 15.981 | 5/17/2011 02:14:01 | 23.922 |
| 5/21/2011 05:42:01 | 15.981 | 5/17/2011 02:44:01 | 23.859 |
| 5/21/2011 06:12:01 | 15.855 | 5/17/2011 03:14:01 | 23.859 |
| 5/21/2011 06:42:01 | 15.981 | 5/17/2011 03:44:01 | 23.797 |
| 5/21/2011 07:12:01 | 16.607 | 5/17/2011 04:14:01 | 23.797 |
| 5/21/2011 07:42:01 | 17.922 | 5/17/2011 04:44:01 | 23.797 |
| 5/21/2011 08:12:01 | 19.862 | 5/17/2011 05:14:01 | 23.734 |
| 5/21/2011 08:42:01 | 21.989 | 5/17/2011 05:44:01 | 23.734 |
| 5/21/2011 09:12:01 | 23.927 | 5/17/2011 06:14:01 | 23.672 |
| 5/21/2011 09:42:01 | 25.677 | 5/17/2011 06:44:01 | 23.672 |
| 5/21/2011 10:12:01 | 27.052 | 5/17/2011 07:14:01 | 23.609 |
| 5/21/2011 10:42:01 | 28.052 | 5/17/2011 07:44:01 | 23.609 |
| 5/21/2011 11:12:01 | 29.051 | 5/17/2011 08:14:01 | 23.547 |
| 5/21/2011 11:42:01 | 29.613 | 5/17/2011 08:44:01 | 23.484 |
| 5/21/2011 12:12:01 | 30.175 | 5/17/2011 09:14:01 | 23.484 |
| 5/21/2011 12:42:01 | 30.549 | 5/17/2011 09:44:01 | 23.484 |
| 5/21/2011 13:12:01 | 30.737 | 5/17/2011 10:14:01 | 23.421 |
| 5/21/2011 13:42:01 | 30.737 | 5/17/2011 10:44:01 | 23.421 |
| 5/21/2011 14:12:01 | 31.049 | 5/17/2011 11:14:01 | 23.421 |
| 5/21/2011 14:42:01 | 30.237 | 5/17/2011 11:44:01 | 23.421 |
| 5/21/2011 15:12:01 | 28.801 | 5/17/2011 12:14:01 | 23.484 |
| 5/21/2011 15:42:01 | 27.302 | 5/17/2011 12:44:01 | 23.484 |
| 5/21/2011 16:12:01 | 26.115 | 5/17/2011 13:14:01 | 23.484 |
| 5/21/2011 16:42:01 | 24.990 | 5/17/2011 13:44:01 | 23.547 |
| 5/21/2011 17:12:01 | 23.927 | 5/17/2011 14:14:01 | 23.547 |
| 5/21/2011 17:42:01 | 22.552 | 5/17/2011 14:44:01 | 23.609 |
| 5/21/2011 18:12:01 | 21.176 | 5/17/2011 15:14:01 | 23.609 |
| 5/21/2011 18:42:01 | 20.175 | 5/17/2011 15:44:01 | 23.672 |
| 5/21/2011 19:12:01 | 19.361 | 5/17/2011 16:14:01 | 23.672 |
| 5/21/2011 19:42:01 | 18.673 | 5/17/2011 16:44:01 | 23.734 |
| 5/21/2011 20:12:01 | 17.922 | 5/17/2011 17:14:01 | 23.734 |
| 5/21/2011 20:42:01 | 17.358 | 5/17/2011 17:44:01 | 23.734 |
| 5/21/2011 21:12:01 | 16.982 | 5/17/2011 18:14:01 | 23.797 |
| 5/21/2011 21:42:01 | 16.482 | 5/17/2011 18:44:01 | 23.797 |
| 5/21/2011 22:12:01 | 16.231 | 5/17/2011 19:14:01 | 23.797 |
| 5/21/2011 22:42:01 | 16.106 | 5/17/2011 19:44:01 | 23.797 |
| 5/21/2011 23:12:01 | 16.168 | 5/17/2011 20:14:01 | 23.797 |
| 5/21/2011 23:42:01 | 16.168 | 5/17/2011 20:44:01 | 23.797 |
| 5/22/2011 00:12:01 | 15.855 | 5/17/2011 21:14:01 | 23.797 |
| 5/22/2011 00:42:01 | 15.730 | 5/17/2011 21:44:01 | 23.797 |
| 5/22/2011 01:12:01 | 15.605 | 5/17/2011 22:14:01 | 23.797 |

|                    |        |                    |        |
|--------------------|--------|--------------------|--------|
| 5/22/2011 01:42:01 | 15.605 | 5/17/2011 22:44:01 | 23.797 |
| 5/22/2011 02:12:01 | 15.605 | 5/17/2011 23:14:01 | 23.734 |
| 5/22/2011 02:42:01 | 15.542 | 5/17/2011 23:44:01 | 23.734 |
| 5/22/2011 03:12:01 | 15.480 | 5/18/2011 00:14:01 | 23.734 |
| 5/22/2011 03:42:01 | 15.480 | 5/18/2011 00:44:01 | 23.672 |
| 5/22/2011 04:12:01 | 15.354 | 5/18/2011 01:14:01 | 23.672 |
| 5/22/2011 04:42:01 | 15.730 | 5/18/2011 01:44:01 | 23.609 |
| 5/22/2011 05:12:01 | 15.730 | 5/18/2011 02:14:01 | 23.609 |
| 5/22/2011 05:42:01 | 15.605 | 5/18/2011 02:44:01 | 23.547 |
| 5/22/2011 06:12:01 | 15.667 | 5/18/2011 03:14:01 | 23.547 |
| 5/22/2011 06:42:01 | 15.793 | 5/18/2011 03:44:01 | 23.484 |
| 5/22/2011 07:12:01 | 16.482 | 5/18/2011 04:14:01 | 23.484 |
| 5/22/2011 07:42:01 | 17.796 | 5/18/2011 04:44:01 | 23.484 |
| 5/22/2011 08:12:01 | 19.611 | 5/18/2011 05:14:01 | 23.421 |
| 5/22/2011 08:42:01 | 21.864 | 5/18/2011 05:44:01 | 23.421 |
| 5/22/2011 09:12:01 | 24.115 | 5/18/2011 06:14:01 | 23.359 |
| 5/22/2011 09:42:01 | 26.177 | 5/18/2011 06:44:01 | 23.359 |
| 5/22/2011 10:12:01 | 27.802 | 5/18/2011 07:14:01 | 23.296 |
| 5/22/2011 10:42:01 | 29.488 | 5/18/2011 07:44:01 | 23.296 |
| 5/22/2011 11:12:01 | 29.863 | 5/18/2011 08:14:01 | 23.234 |
| 5/22/2011 11:42:01 | 29.613 | 5/18/2011 08:44:01 | 23.234 |
| 5/22/2011 12:12:01 | 30.737 | 5/18/2011 09:14:01 | 23.234 |
| 5/22/2011 12:42:01 | 31.299 | 5/18/2011 09:44:01 | 23.171 |
| 5/22/2011 13:12:01 | 31.299 | 5/18/2011 10:14:01 | 23.171 |
| 5/22/2011 13:42:01 | 31.111 | 5/18/2011 10:44:01 | 23.171 |
| 5/22/2011 14:12:01 | 31.673 | 5/18/2011 11:14:01 | 23.171 |
| 5/22/2011 14:42:01 | 30.300 | 5/18/2011 11:44:01 | 23.234 |
| 5/22/2011 15:12:01 | 29.551 | 5/18/2011 12:14:01 | 23.234 |
| 5/22/2011 15:42:01 | 28.302 | 5/18/2011 12:44:01 | 23.234 |
| 5/22/2011 16:12:01 | 27.302 | 5/18/2011 13:14:01 | 23.296 |
| 5/22/2011 16:42:01 | 26.490 | 5/18/2011 13:44:01 | 23.296 |
| 5/22/2011 17:12:01 | 25.303 | 5/18/2011 14:14:01 | 23.359 |
| 5/22/2011 17:42:01 | 24.052 | 5/18/2011 14:44:01 | 23.359 |
| 5/22/2011 18:12:01 | 22.927 | 5/18/2011 15:14:01 | 23.421 |
| 5/22/2011 18:42:01 | 22.114 | 5/18/2011 15:44:01 | 23.421 |
| 5/22/2011 19:12:01 | 21.551 | 5/18/2011 16:14:01 | 23.484 |
| 5/22/2011 19:42:01 | 20.988 | 5/18/2011 16:44:01 | 23.484 |
| 5/22/2011 20:12:01 | 20.613 | 5/18/2011 17:14:01 | 23.547 |
| 5/22/2011 20:42:01 | 20.175 | 5/18/2011 17:44:01 | 23.547 |
| 5/22/2011 21:12:01 | 19.924 | 5/18/2011 18:14:01 | 23.609 |
| 5/22/2011 21:42:01 | 19.549 | 5/18/2011 18:44:01 | 23.609 |
| 5/22/2011 22:12:01 | 19.361 | 5/18/2011 19:14:01 | 23.609 |
| 5/22/2011 22:42:01 | 19.111 | 5/18/2011 19:44:01 | 23.672 |
| 5/22/2011 23:12:01 | 18.986 | 5/18/2011 20:14:01 | 23.672 |
| 5/22/2011 23:42:01 | 18.923 | 5/18/2011 20:44:01 | 23.672 |
| 5/23/2011 00:12:01 | 18.798 | 5/18/2011 21:14:01 | 23.672 |
| 5/23/2011 00:42:01 | 19.486 | 5/18/2011 21:44:01 | 23.672 |
| 5/23/2011 01:12:01 | 20.237 | 5/18/2011 22:14:01 | 23.672 |
| 5/23/2011 01:42:01 | 20.425 | 5/18/2011 22:44:01 | 23.609 |
| 5/23/2011 02:12:01 | 20.112 | 5/18/2011 23:14:01 | 23.609 |

|                    |        |                    |        |
|--------------------|--------|--------------------|--------|
| 5/23/2011 02:42:01 | 20.175 | 5/18/2011 23:44:01 | 23.609 |
| 5/23/2011 03:12:01 | 20.237 | 5/19/2011 00:14:01 | 23.609 |
| 5/23/2011 03:42:01 | 19.799 | 5/19/2011 00:44:01 | 23.547 |
| 5/23/2011 04:12:01 | 19.549 | 5/19/2011 01:14:01 | 23.547 |
| 5/23/2011 04:42:01 | 19.236 | 5/19/2011 01:44:01 | 23.547 |
| 5/23/2011 05:12:01 | 18.986 | 5/19/2011 02:14:01 | 23.484 |
| 5/23/2011 05:42:01 | 18.735 | 5/19/2011 02:44:01 | 23.484 |
| 5/23/2011 06:12:01 | 18.548 | 5/19/2011 03:14:01 | 23.484 |
| 5/23/2011 06:42:01 | 18.360 | 5/19/2011 03:44:01 | 23.421 |
| 5/23/2011 07:12:01 | 18.860 | 5/19/2011 04:14:01 | 23.421 |
| 5/23/2011 07:42:01 | 20.112 | 5/19/2011 04:44:01 | 23.421 |
| 5/23/2011 08:12:01 | 21.926 | 5/19/2011 05:14:01 | 23.359 |
| 5/23/2011 08:42:01 | 23.740 | 5/19/2011 05:44:01 | 23.359 |
| 5/23/2011 09:12:01 | 25.365 | 5/19/2011 06:14:01 | 23.296 |
| 5/23/2011 09:42:01 | 26.865 | 5/19/2011 06:44:01 | 23.296 |
| 5/23/2011 10:12:01 | 28.489 | 5/19/2011 07:14:01 | 23.296 |
| 5/23/2011 10:42:01 | 29.488 | 5/19/2011 07:44:01 | 23.234 |
| 5/23/2011 11:12:01 | 30.487 | 5/19/2011 08:14:01 | 23.234 |
| 5/23/2011 11:42:01 | 31.236 | 5/19/2011 08:44:01 | 23.234 |
| 5/23/2011 12:12:01 | 31.548 | 5/19/2011 09:14:01 | 23.171 |
| 5/23/2011 12:42:01 | 31.985 | 5/19/2011 09:44:01 | 23.171 |
| 5/23/2011 13:12:01 | 31.798 | 5/19/2011 10:14:01 | 23.171 |
| 5/23/2011 13:42:01 | 31.611 | 5/19/2011 10:44:01 | 23.171 |
| 5/23/2011 14:12:01 | 32.235 | 5/19/2011 11:14:01 | 23.171 |
| 5/23/2011 14:42:01 | 31.423 | 5/19/2011 11:44:01 | 23.171 |
| 5/23/2011 15:12:01 | 30.300 | 5/19/2011 12:14:01 | 23.171 |
| 5/23/2011 15:42:01 | 28.801 | 5/19/2011 12:44:01 | 23.234 |
| 5/23/2011 16:12:01 | 27.489 | 5/19/2011 13:14:01 | 23.234 |
| 5/23/2011 16:42:01 | 26.302 | 5/19/2011 13:44:01 | 23.296 |
| 5/23/2011 17:12:01 | 25.240 | 5/19/2011 14:14:01 | 23.296 |
| 5/23/2011 17:42:01 | 24.365 | 5/19/2011 14:44:01 | 23.359 |
| 5/23/2011 18:12:01 | 23.365 | 5/19/2011 15:14:01 | 23.359 |
| 5/23/2011 18:42:01 | 22.739 | 5/19/2011 15:44:01 | 23.359 |
| 5/23/2011 19:12:01 | 21.926 | 5/19/2011 16:14:01 | 23.421 |
| 5/23/2011 19:42:01 | 21.301 | 5/19/2011 16:44:01 | 23.421 |
| 5/23/2011 20:12:01 | 20.738 | 5/19/2011 17:14:01 | 23.484 |
| 5/23/2011 20:42:01 | 20.550 | 5/19/2011 17:44:01 | 23.484 |
| 5/23/2011 21:12:01 | 20.550 | 5/19/2011 18:14:01 | 23.547 |
| 5/23/2011 21:42:01 | 20.362 | 5/19/2011 18:44:01 | 23.547 |
| 5/23/2011 22:12:01 | 19.924 | 5/19/2011 19:14:01 | 23.547 |
| 5/23/2011 22:42:01 | 19.799 | 5/19/2011 19:44:01 | 23.547 |
| 5/23/2011 23:12:01 | 19.611 | 5/19/2011 20:14:01 | 23.547 |
| 5/23/2011 23:42:01 | 19.611 | 5/19/2011 20:44:01 | 23.547 |
| 5/24/2011 00:12:01 | 20.050 | 5/19/2011 21:14:01 | 23.547 |
| 5/24/2011 00:42:01 | 20.175 | 5/19/2011 21:44:01 | 23.547 |
| 5/24/2011 01:12:01 | 20.175 | 5/19/2011 22:14:01 | 23.547 |
| 5/24/2011 01:42:01 | 19.737 | 5/19/2011 22:44:01 | 23.547 |
| 5/24/2011 02:12:01 | 19.486 | 5/19/2011 23:14:01 | 23.547 |
| 5/24/2011 02:42:01 | 19.299 | 5/19/2011 23:44:01 | 23.484 |
| 5/24/2011 03:12:01 | 19.048 | 5/20/2011 00:14:01 | 23.484 |

|                    |        |                    |        |
|--------------------|--------|--------------------|--------|
| 5/24/2011 03:42:01 | 19.236 | 5/20/2011 00:44:01 | 23.421 |
| 5/24/2011 04:12:01 | 19.486 | 5/20/2011 01:14:01 | 23.421 |
| 5/24/2011 04:42:01 | 20.237 | 5/20/2011 01:44:01 | 23.421 |
| 5/24/2011 05:12:01 | 20.487 | 5/20/2011 02:14:01 | 23.359 |
| 5/24/2011 05:42:01 | 20.613 | 5/20/2011 02:44:01 | 23.359 |
| 5/24/2011 06:12:01 | 20.425 | 5/20/2011 03:14:01 | 23.296 |
| 5/24/2011 06:42:01 | 19.987 | 5/20/2011 03:44:01 | 23.296 |
| 5/24/2011 07:12:01 | 20.487 | 5/20/2011 04:14:01 | 23.296 |
| 5/24/2011 07:42:01 | 21.426 | 5/20/2011 04:44:01 | 23.234 |
| 5/24/2011 08:12:01 | 22.489 | 5/20/2011 05:14:01 | 23.234 |
| 5/24/2011 08:42:01 | 24.552 | 5/20/2011 05:44:01 | 23.234 |
| 5/24/2011 09:12:01 | 25.990 | 5/20/2011 06:14:01 | 23.171 |
| 5/24/2011 09:42:01 | 27.177 | 5/20/2011 06:44:01 | 23.171 |
| 5/24/2011 10:12:01 | 28.614 | 5/20/2011 07:14:01 | 23.171 |
| 5/24/2011 10:42:01 | 29.551 | 5/20/2011 07:44:01 | 23.109 |
| 5/24/2011 11:12:01 | 30.549 | 5/20/2011 08:14:01 | 23.109 |
| 5/24/2011 11:42:01 | 31.236 | 5/20/2011 08:44:01 | 23.109 |
| 5/24/2011 12:12:01 | 31.423 | 5/20/2011 09:14:01 | 23.046 |
| 5/24/2011 12:42:01 | 31.548 | 5/20/2011 09:44:01 | 23.046 |
| 5/24/2011 13:12:01 | 31.673 | 5/20/2011 10:14:01 | 23.046 |
| 5/24/2011 13:42:01 | 31.985 | 5/20/2011 10:44:01 | 23.046 |
| 5/24/2011 14:12:01 | 31.236 | 5/20/2011 11:14:01 | 23.046 |
| 5/24/2011 14:42:01 | 30.050 | 5/20/2011 11:44:01 | 23.046 |
| 5/24/2011 15:12:01 | 29.613 | 5/20/2011 12:14:01 | 23.046 |
| 5/24/2011 15:42:01 | 28.739 | 5/20/2011 12:44:01 | 23.109 |
| 5/24/2011 16:12:01 | 28.052 | 5/20/2011 13:14:01 | 23.109 |
| 5/24/2011 16:42:01 | 27.115 | 5/20/2011 13:44:01 | 23.171 |
| 5/24/2011 17:12:01 | 26.177 | 5/20/2011 14:14:01 | 23.171 |
| 5/24/2011 17:42:01 | 25.052 | 5/20/2011 14:44:01 | 23.234 |
| 5/24/2011 18:12:01 | 24.115 | 5/20/2011 15:14:01 | 23.234 |
| 5/24/2011 18:42:01 | 23.302 | 5/20/2011 15:44:01 | 23.296 |
| 5/24/2011 19:12:01 | 22.489 | 5/20/2011 16:14:01 | 23.296 |
| 5/24/2011 19:42:01 | 22.051 | 5/20/2011 16:44:01 | 23.359 |
| 5/24/2011 20:12:01 | 21.426 | 5/20/2011 17:14:01 | 23.421 |
| 5/24/2011 20:42:01 | 21.051 | 5/20/2011 17:44:01 | 23.421 |
| 5/24/2011 21:12:01 | 21.113 | 5/20/2011 18:14:01 | 23.421 |
| 5/24/2011 21:42:01 | 21.614 | 5/20/2011 18:44:01 | 23.484 |
| 5/24/2011 22:12:01 | 21.926 | 5/20/2011 19:14:01 | 23.484 |
| 5/24/2011 22:42:01 | 22.614 | 5/20/2011 19:44:01 | 23.484 |
| 5/24/2011 23:12:01 | 23.114 | 5/20/2011 20:14:01 | 23.484 |
| 5/24/2011 23:42:01 | 23.552 | 5/20/2011 20:44:01 | 23.484 |
| 5/25/2011 00:12:01 | 23.427 | 5/20/2011 21:14:01 | 23.484 |
| 5/25/2011 00:42:01 | 23.240 | 5/20/2011 21:44:01 | 23.484 |
| 5/25/2011 01:12:01 | 22.989 | 5/20/2011 22:14:01 | 23.484 |
| 5/25/2011 01:42:01 | 23.177 | 5/20/2011 22:44:01 | 23.484 |
| 5/25/2011 02:12:01 | 22.927 | 5/20/2011 23:14:01 | 23.484 |
| 5/25/2011 02:42:01 | 22.552 | 5/20/2011 23:44:01 | 23.421 |
| 5/25/2011 03:12:01 | 21.614 | 5/21/2011 00:14:01 | 23.421 |
| 5/25/2011 03:42:01 | 21.238 | 5/21/2011 00:44:01 | 23.421 |
| 5/25/2011 04:12:01 | 20.863 | 5/21/2011 01:14:01 | 23.359 |

|                    |        |                    |        |
|--------------------|--------|--------------------|--------|
| 5/25/2011 04:42:01 | 20.425 | 5/21/2011 01:44:01 | 23.359 |
| 5/25/2011 05:12:01 | 20.050 | 5/21/2011 02:14:01 | 23.359 |
| 5/25/2011 05:42:01 | 20.050 | 5/21/2011 02:44:01 | 23.296 |
| 5/25/2011 06:12:01 | 19.549 | 5/21/2011 03:14:01 | 23.296 |
| 5/25/2011 06:42:01 | 19.361 | 5/21/2011 03:44:01 | 23.296 |
| 5/25/2011 07:12:01 | 20.050 | 5/21/2011 04:14:01 | 23.234 |
| 5/25/2011 07:42:01 | 21.301 | 5/21/2011 04:44:01 | 23.234 |
| 5/25/2011 08:12:01 | 22.864 | 5/21/2011 05:14:01 | 23.234 |
| 5/25/2011 08:42:01 | 24.865 | 5/21/2011 05:44:01 | 23.171 |
| 5/25/2011 09:12:01 | 26.490 | 5/21/2011 06:14:01 | 23.171 |
| 5/25/2011 09:42:01 | 27.489 | 5/21/2011 06:44:01 | 23.171 |
| 5/25/2011 10:12:01 | 28.989 | 5/21/2011 07:14:01 | 23.109 |
| 5/25/2011 10:42:01 | 29.301 | 5/21/2011 07:44:01 | 23.109 |
| 5/25/2011 11:12:01 | 30.237 | 5/21/2011 08:14:01 | 23.109 |
| 5/25/2011 11:42:01 | 31.236 | 5/21/2011 08:44:01 | 23.046 |
| 5/25/2011 12:12:01 | 31.611 | 5/21/2011 09:14:01 | 23.046 |
| 5/25/2011 12:42:01 | 32.048 | 5/21/2011 09:44:01 | 23.046 |
| 5/25/2011 13:12:01 | 31.361 | 5/21/2011 10:14:01 | 23.046 |
| 5/25/2011 13:42:01 | 30.300 | 5/21/2011 10:44:01 | 23.046 |
| 5/25/2011 14:12:01 | 31.111 | 5/21/2011 11:14:01 | 23.046 |
| 5/25/2011 14:42:01 | 29.800 | 5/21/2011 11:44:01 | 23.046 |
| 5/25/2011 15:12:01 | 30.050 | 5/21/2011 12:14:01 | 23.046 |
| 5/25/2011 15:42:01 | 29.488 | 5/21/2011 12:44:01 | 23.109 |
| 5/25/2011 16:12:01 | 28.551 | 5/21/2011 13:14:01 | 23.109 |
| 5/25/2011 16:42:01 | 27.240 | 5/21/2011 13:44:01 | 23.171 |
| 5/25/2011 17:12:01 | 26.302 | 5/21/2011 14:14:01 | 23.171 |
| 5/25/2011 17:42:01 | 25.428 | 5/21/2011 14:44:01 | 23.171 |
| 5/25/2011 18:12:01 | 24.365 | 5/21/2011 15:14:01 | 23.234 |
| 5/25/2011 18:42:01 | 23.365 | 5/21/2011 15:44:01 | 23.234 |
| 5/25/2011 19:12:01 | 22.739 | 5/21/2011 16:14:01 | 23.296 |
| 5/25/2011 19:42:01 | 22.114 | 5/21/2011 16:44:01 | 23.296 |
| 5/25/2011 20:12:01 | 21.926 | 5/21/2011 17:14:01 | 23.359 |
| 5/25/2011 20:42:01 | 21.739 | 5/21/2011 17:44:01 | 23.359 |
| 5/25/2011 21:12:01 | 21.551 | 5/21/2011 18:14:01 | 23.359 |
| 5/25/2011 21:42:01 | 22.114 | 5/21/2011 18:44:01 | 23.421 |
| 5/25/2011 22:12:01 | 22.864 | 5/21/2011 19:14:01 | 23.421 |
| 5/25/2011 22:42:01 | 23.052 | 5/21/2011 19:44:01 | 23.421 |
| 5/25/2011 23:12:01 | 23.177 | 5/21/2011 20:14:01 | 23.421 |
| 5/25/2011 23:42:01 | 22.864 | 5/21/2011 20:44:01 | 23.421 |
| 5/26/2011 00:12:01 | 22.051 | 5/21/2011 21:14:01 | 23.421 |
| 5/26/2011 00:42:01 | 21.864 | 5/21/2011 21:44:01 | 23.421 |
| 5/26/2011 01:12:01 | 21.614 | 5/21/2011 22:14:01 | 23.421 |
| 5/26/2011 01:42:01 | 20.800 | 5/21/2011 22:44:01 | 23.421 |
| 5/26/2011 02:12:01 | 20.237 | 5/21/2011 23:14:01 | 23.359 |
| 5/26/2011 02:42:01 | 19.862 | 5/21/2011 23:44:01 | 23.359 |
| 5/26/2011 03:12:01 | 19.424 | 5/22/2011 00:14:01 | 23.359 |
| 5/26/2011 03:42:01 | 19.173 | 5/22/2011 00:44:01 | 23.296 |
| 5/26/2011 04:12:01 | 18.923 | 5/22/2011 01:14:01 | 23.296 |
| 5/26/2011 04:42:01 | 18.860 | 5/22/2011 01:44:01 | 23.234 |
| 5/26/2011 05:12:01 | 18.673 | 5/22/2011 02:14:01 | 23.234 |

|                    |        |                    |        |
|--------------------|--------|--------------------|--------|
| 5/26/2011 05:42:01 | 18.360 | 5/22/2011 02:44:01 | 23.171 |
| 5/26/2011 06:12:01 | 18.235 | 5/22/2011 03:14:01 | 23.171 |
| 5/26/2011 06:42:01 | 18.109 | 5/22/2011 03:44:01 | 23.171 |
| 5/26/2011 07:12:01 | 18.986 | 5/22/2011 04:14:01 | 23.109 |
| 5/26/2011 07:42:01 | 20.362 | 5/22/2011 04:44:01 | 23.109 |
| 5/26/2011 08:12:01 | 21.864 | 5/22/2011 05:14:01 | 23.046 |
| 5/26/2011 08:42:01 | 23.740 | 5/22/2011 05:44:01 | 23.046 |
| 5/26/2011 09:12:01 | 25.240 | 5/22/2011 06:14:01 | 22.984 |
| 5/26/2011 09:42:01 | 26.615 | 5/22/2011 06:44:01 | 22.984 |
| 5/26/2011 10:12:01 | 28.302 | 5/22/2011 07:14:01 | 22.984 |
| 5/26/2011 10:42:01 | 29.551 | 5/22/2011 07:44:01 | 22.921 |
| 5/26/2011 11:12:01 | 30.300 | 5/22/2011 08:14:01 | 22.921 |
| 5/26/2011 11:42:01 | 31.174 | 5/22/2011 08:44:01 | 22.921 |
| 5/26/2011 12:12:01 | 31.299 | 5/22/2011 09:14:01 | 22.859 |
| 5/26/2011 12:42:01 | 31.611 | 5/22/2011 09:44:01 | 22.859 |
| 5/26/2011 13:12:01 | 31.798 | 5/22/2011 10:14:01 | 22.859 |
| 5/26/2011 13:42:01 | 32.048 | 5/22/2011 10:44:01 | 22.859 |
| 5/26/2011 14:12:01 | 31.423 | 5/22/2011 11:14:01 | 22.859 |
| 5/26/2011 14:42:01 | 29.988 | 5/22/2011 11:44:01 | 22.921 |
| 5/26/2011 15:12:01 | 29.301 | 5/22/2011 12:14:01 | 22.921 |
| 5/26/2011 15:42:01 | 28.551 | 5/22/2011 12:44:01 | 22.984 |
| 5/26/2011 16:12:01 | 27.302 | 5/22/2011 13:14:01 | 22.984 |
| 5/26/2011 16:42:01 | 26.177 | 5/22/2011 13:44:01 | 23.046 |
| 5/26/2011 17:12:01 | 25.490 | 5/22/2011 14:14:01 | 23.046 |
| 5/26/2011 17:42:01 | 24.677 | 5/22/2011 14:44:01 | 23.109 |
| 5/26/2011 18:12:01 | 24.052 | 5/22/2011 15:14:01 | 23.171 |
| 5/26/2011 18:42:01 | 23.552 | 5/22/2011 15:44:01 | 23.234 |
| 5/26/2011 19:12:01 | 23.427 | 5/22/2011 16:14:01 | 23.234 |
| 5/26/2011 19:42:01 | 23.114 | 5/22/2011 16:44:01 | 23.296 |
| 5/26/2011 20:12:01 | 23.114 | 5/22/2011 17:14:01 | 23.296 |
| 5/26/2011 20:42:01 | 22.802 | 5/22/2011 17:44:01 | 23.359 |
| 5/26/2011 21:12:01 | 22.864 | 5/22/2011 18:14:01 | 23.359 |
| 5/26/2011 21:42:01 | 22.614 | 5/22/2011 18:44:01 | 23.421 |
| 5/26/2011 22:12:01 | 22.677 | 5/22/2011 19:14:01 | 23.421 |
| 5/26/2011 22:42:01 | 22.614 | 5/22/2011 19:44:01 | 23.484 |
| 5/26/2011 23:12:01 | 22.677 | 5/22/2011 20:14:01 | 23.484 |
| 5/26/2011 23:42:01 | 22.239 | 5/22/2011 20:44:01 | 23.484 |
| 5/27/2011 00:12:01 | 21.551 | 5/22/2011 21:14:01 | 23.484 |
| 5/27/2011 00:42:01 | 21.176 | 5/22/2011 21:44:01 | 23.484 |
| 5/27/2011 01:12:01 | 21.176 | 5/22/2011 22:14:01 | 23.484 |
| 5/27/2011 01:42:01 | 20.925 | 5/22/2011 22:44:01 | 23.484 |
| 5/27/2011 02:12:01 | 20.425 | 5/22/2011 23:14:01 | 23.484 |
| 5/27/2011 02:42:01 | 20.237 | 5/22/2011 23:44:01 | 23.484 |
| 5/27/2011 03:12:01 | 19.987 | 5/23/2011 00:14:01 | 23.484 |
| 5/27/2011 03:42:01 | 19.611 | 5/23/2011 00:44:01 | 23.484 |
| 5/27/2011 04:12:01 | 19.236 | 5/23/2011 01:14:01 | 23.421 |
| 5/27/2011 04:42:01 | 18.860 | 5/23/2011 01:44:01 | 23.421 |
| 5/27/2011 05:12:01 | 18.548 | 5/23/2011 02:14:01 | 23.421 |
| 5/27/2011 05:42:01 | 18.297 | 5/23/2011 02:44:01 | 23.421 |
| 5/27/2011 06:12:01 | 17.984 | 5/23/2011 03:14:01 | 23.359 |

|                    |        |                    |        |
|--------------------|--------|--------------------|--------|
| 5/27/2011 06:42:01 | 17.734 | 5/23/2011 03:44:01 | 23.359 |
| 5/27/2011 07:12:01 | 18.548 | 5/23/2011 04:14:01 | 23.359 |
| 5/27/2011 07:42:01 | 20.112 | 5/23/2011 04:44:01 | 23.359 |
| 5/27/2011 08:12:01 | 21.551 | 5/23/2011 05:14:01 | 23.359 |
| 5/27/2011 08:42:01 | 23.302 | 5/23/2011 05:44:01 | 23.359 |
| 5/27/2011 09:12:01 | 25.052 | 5/23/2011 06:14:01 | 23.296 |
| 5/27/2011 09:42:01 | 26.677 | 5/23/2011 06:44:01 | 23.296 |
| 5/27/2011 10:12:01 | 28.052 | 5/23/2011 07:14:01 | 23.296 |
| 5/27/2011 10:42:01 | 29.113 | 5/23/2011 07:44:01 | 23.296 |
| 5/27/2011 11:12:01 | 29.925 | 5/23/2011 08:14:01 | 23.296 |
| 5/27/2011 11:42:01 | 30.612 | 5/23/2011 08:44:01 | 23.296 |
| 5/27/2011 12:12:01 | 31.174 | 5/23/2011 09:14:01 | 23.234 |
| 5/27/2011 12:42:01 | 31.361 | 5/23/2011 09:44:01 | 23.234 |
| 5/27/2011 13:12:01 | 31.548 | 5/23/2011 10:14:01 | 23.234 |
| 5/27/2011 13:42:01 | 31.673 | 5/23/2011 10:44:01 | 23.234 |
| 5/27/2011 14:12:01 | 31.735 | 5/23/2011 11:14:01 | 23.296 |
| 5/27/2011 14:42:01 | 30.986 | 5/23/2011 11:44:01 | 23.296 |
| 5/27/2011 15:12:01 | 30.050 | 5/23/2011 12:14:01 | 23.296 |
| 5/27/2011 15:42:01 | 28.614 | 5/23/2011 12:44:01 | 23.359 |
| 5/27/2011 16:12:01 | 27.240 | 5/23/2011 13:14:01 | 23.359 |
| 5/27/2011 16:42:01 | 26.302 | 5/23/2011 13:44:01 | 23.421 |
| 5/27/2011 17:12:01 | 25.178 | 5/23/2011 14:14:01 | 23.421 |
| 5/27/2011 17:42:01 | 23.865 | 5/23/2011 14:44:01 | 23.484 |
| 5/27/2011 18:12:01 | 22.802 | 5/23/2011 15:14:01 | 23.547 |
| 5/27/2011 18:42:01 | 22.051 | 5/23/2011 15:44:01 | 23.547 |
| 5/27/2011 19:12:01 | 21.363 | 5/23/2011 16:14:01 | 23.547 |
| 5/27/2011 19:42:01 | 20.863 | 5/23/2011 16:44:01 | 23.609 |
| 5/27/2011 20:12:01 | 20.425 | 5/23/2011 17:14:01 | 23.609 |
| 5/27/2011 20:42:01 | 20.362 | 5/23/2011 17:44:01 | 23.672 |
| 5/27/2011 21:12:01 | 20.050 | 5/23/2011 18:14:01 | 23.672 |
| 5/27/2011 21:42:01 | 19.862 | 5/23/2011 18:44:01 | 23.734 |
| 5/27/2011 22:12:01 | 19.799 | 5/23/2011 19:14:01 | 23.734 |
| 5/27/2011 22:42:01 | 19.799 | 5/23/2011 19:44:01 | 23.734 |
| 5/27/2011 23:12:01 | 19.799 | 5/23/2011 20:14:01 | 23.734 |
| 5/27/2011 23:42:01 | 19.737 | 5/23/2011 20:44:01 | 23.734 |
| 5/28/2011 00:12:01 | 19.611 | 5/23/2011 21:14:01 | 23.734 |
| 5/28/2011 00:42:01 | 19.424 | 5/23/2011 21:44:01 | 23.734 |
| 5/28/2011 01:12:01 | 19.236 | 5/23/2011 22:14:01 | 23.734 |
| 5/28/2011 01:42:01 | 19.111 | 5/23/2011 22:44:01 | 23.734 |
| 5/28/2011 02:12:01 | 19.111 | 5/23/2011 23:14:01 | 23.734 |
| 5/28/2011 02:42:01 | 19.236 | 5/23/2011 23:44:01 | 23.734 |
| 5/28/2011 03:12:01 | 19.361 | 5/24/2011 00:14:01 | 23.734 |
| 5/28/2011 03:42:01 | 19.299 | 5/24/2011 00:44:01 | 23.734 |
| 5/28/2011 04:12:01 | 19.173 | 5/24/2011 01:14:01 | 23.672 |
| 5/28/2011 04:42:01 | 18.986 | 5/24/2011 01:44:01 | 23.672 |
| 5/28/2011 05:12:01 | 18.860 | 5/24/2011 02:14:01 | 23.672 |
| 5/28/2011 05:42:01 | 18.798 | 5/24/2011 02:44:01 | 23.672 |
| 5/28/2011 06:12:01 | 18.673 | 5/24/2011 03:14:01 | 23.672 |
| 5/28/2011 06:42:01 | 18.485 | 5/24/2011 03:44:01 | 23.672 |
| 5/28/2011 07:12:01 | 18.860 | 5/24/2011 04:14:01 | 23.609 |



|                    |        |                    |        |
|--------------------|--------|--------------------|--------|
| 5/28/2011 07:42:01 | 20.112 | 5/24/2011 04:44:01 | 23.609 |
| 5/28/2011 08:12:01 | 21.989 | 5/24/2011 05:14:01 | 23.609 |
| 5/28/2011 08:42:01 | 23.740 | 5/24/2011 05:44:01 | 23.609 |
| 5/28/2011 09:12:01 | 25.178 | 5/24/2011 06:14:01 | 23.547 |
| 5/28/2011 09:42:01 | 26.552 | 5/24/2011 06:44:01 | 23.547 |
| 5/28/2011 10:12:01 | 28.364 | 5/24/2011 07:14:01 | 23.547 |
| 5/28/2011 10:42:01 | 29.675 | 5/24/2011 07:44:01 | 23.547 |
| 5/28/2011 11:12:01 | 30.549 | 5/24/2011 08:14:01 | 23.547 |
| 5/28/2011 11:42:01 | 31.299 | 5/24/2011 08:44:01 | 23.484 |
| 5/28/2011 12:12:01 | 31.735 | 5/24/2011 09:14:01 | 23.484 |
| 5/28/2011 12:42:01 | 29.613 | 5/24/2011 09:44:01 | 23.484 |
| 5/28/2011 13:12:01 | 31.361 | 5/24/2011 10:14:01 | 23.484 |
| 5/28/2011 13:42:01 | 31.735 | 5/24/2011 10:44:01 | 23.484 |
| 5/28/2011 14:12:01 | 32.110 | 5/24/2011 11:14:01 | 23.484 |
| 5/28/2011 14:42:01 | 31.423 | 5/24/2011 11:44:01 | 23.547 |
| 5/28/2011 15:12:01 | 29.488 | 5/24/2011 12:14:01 | 23.547 |
| 5/28/2011 15:42:01 | 27.052 | 5/24/2011 12:44:01 | 23.547 |
| 5/28/2011 16:12:01 | 26.177 | 5/24/2011 13:14:01 | 23.609 |
| 5/28/2011 16:42:01 | 25.365 | 5/24/2011 13:44:01 | 23.609 |
| 5/28/2011 17:12:01 | 24.740 | 5/24/2011 14:14:01 | 23.672 |
| 5/28/2011 17:42:01 | 23.990 | 5/24/2011 14:44:01 | 23.672 |
| 5/28/2011 18:12:01 | 23.052 | 5/24/2011 15:14:01 | 23.734 |
| 5/28/2011 18:42:01 | 21.926 | 5/24/2011 15:44:01 | 23.734 |
| 5/28/2011 19:12:01 | 21.113 | 5/24/2011 16:14:01 | 23.797 |
| 5/28/2011 19:42:01 | 20.738 | 5/24/2011 16:44:01 | 23.797 |
| 5/28/2011 20:12:01 | 20.863 | 5/24/2011 17:14:01 | 23.797 |
| 5/28/2011 20:42:01 | 20.863 | 5/24/2011 17:44:01 | 23.859 |
| 5/28/2011 21:12:01 | 20.988 | 5/24/2011 18:14:01 | 23.859 |
| 5/28/2011 21:42:01 | 20.925 | 5/24/2011 18:44:01 | 23.922 |
| 5/28/2011 22:12:01 | 20.863 | 5/24/2011 19:14:01 | 23.922 |
| 5/28/2011 22:42:01 | 20.925 | 5/24/2011 19:44:01 | 23.922 |
| 5/28/2011 23:12:01 | 20.675 | 5/24/2011 20:14:01 | 23.922 |
| 5/28/2011 23:42:01 | 20.550 | 5/24/2011 20:44:01 | 23.984 |
| 5/29/2011 00:12:01 | 20.300 | 5/24/2011 21:14:01 | 23.984 |
| 5/29/2011 00:42:01 | 19.924 | 5/24/2011 21:44:01 | 23.984 |
| 5/29/2011 01:12:01 | 19.549 | 5/24/2011 22:14:01 | 23.984 |
| 5/29/2011 01:42:01 | 19.361 | 5/24/2011 22:44:01 | 23.984 |
| 5/29/2011 02:12:01 | 19.486 | 5/24/2011 23:14:01 | 23.922 |
| 5/29/2011 02:42:01 | 19.299 | 5/24/2011 23:44:01 | 23.922 |
| 5/29/2011 03:12:01 | 19.048 | 5/25/2011 00:14:01 | 23.922 |
| 5/29/2011 03:42:01 | 18.923 | 5/25/2011 00:44:01 | 23.922 |
| 5/29/2011 04:12:01 | 18.735 | 5/25/2011 01:14:01 | 23.922 |
| 5/29/2011 04:42:01 | 18.610 | 5/25/2011 01:44:01 | 23.922 |
| 5/29/2011 05:12:01 | 18.548 | 5/25/2011 02:14:01 | 23.922 |
| 5/29/2011 05:42:01 | 18.673 | 5/25/2011 02:44:01 | 23.922 |
| 5/29/2011 06:12:01 | 18.735 | 5/25/2011 03:14:01 | 23.922 |
| 5/29/2011 06:42:01 | 18.735 | 5/25/2011 03:44:01 | 23.922 |
| 5/29/2011 07:12:01 | 19.236 | 5/25/2011 04:14:01 | 23.922 |
| 5/29/2011 07:42:01 | 20.425 | 5/25/2011 04:44:01 | 23.922 |
| 5/29/2011 08:12:01 | 22.239 | 5/25/2011 05:14:01 | 23.922 |

|                    |        |                    |        |
|--------------------|--------|--------------------|--------|
| 5/29/2011 08:42:01 | 24.177 | 5/25/2011 05:44:01 | 23.859 |
| 5/29/2011 09:12:01 | 25.740 | 5/25/2011 06:14:01 | 23.859 |
| 5/29/2011 09:42:01 | 27.115 | 5/25/2011 06:44:01 | 23.859 |
| 5/29/2011 10:12:01 | 28.801 | 5/25/2011 07:14:01 | 23.859 |
| 5/29/2011 10:42:01 | 29.551 | 5/25/2011 07:44:01 | 23.859 |
| 5/29/2011 11:12:01 | 30.612 | 5/25/2011 08:14:01 | 23.797 |
| 5/29/2011 11:42:01 | 28.364 | 5/25/2011 08:44:01 | 23.797 |
| 5/29/2011 12:12:01 | 30.924 | 5/25/2011 09:14:01 | 23.797 |
| 5/29/2011 12:42:01 | 31.673 | 5/25/2011 09:44:01 | 23.797 |
| 5/29/2011 13:12:01 | 32.422 | 5/25/2011 10:14:01 | 23.797 |
| 5/29/2011 13:42:01 | 31.860 | 5/25/2011 10:44:01 | 23.797 |
| 5/29/2011 14:12:01 | 31.299 | 5/25/2011 11:14:01 | 23.797 |
| 5/29/2011 14:42:01 | 30.425 | 5/25/2011 11:44:01 | 23.797 |
| 5/29/2011 15:12:01 | 28.989 | 5/25/2011 12:14:01 | 23.797 |
| 5/29/2011 15:42:01 | 27.989 | 5/25/2011 12:44:01 | 23.859 |
| 5/29/2011 16:12:01 | 26.865 | 5/25/2011 13:14:01 | 23.859 |
| 5/29/2011 16:42:01 | 26.177 | 5/25/2011 13:44:01 | 23.859 |
| 5/29/2011 17:12:01 | 25.240 | 5/25/2011 14:14:01 | 23.922 |
| 5/29/2011 17:42:01 | 24.552 | 5/25/2011 14:44:01 | 23.922 |
| 5/29/2011 18:12:01 | 23.677 | 5/25/2011 15:14:01 | 23.922 |
| 5/29/2011 18:42:01 | 22.927 | 5/25/2011 15:44:01 | 23.984 |
| 5/29/2011 19:12:01 | 22.427 | 5/25/2011 16:14:01 | 23.984 |
| 5/29/2011 19:42:01 | 22.176 | 5/25/2011 16:44:01 | 24.047 |
| 5/29/2011 20:12:01 | 22.051 | 5/25/2011 17:14:01 | 24.047 |
| 5/29/2011 20:42:01 | 21.614 | 5/25/2011 17:44:01 | 24.047 |
| 5/29/2011 21:12:01 | 21.614 | 5/25/2011 18:14:01 | 24.109 |
| 5/29/2011 21:42:01 | 21.614 | 5/25/2011 18:44:01 | 24.109 |
| 5/29/2011 22:12:01 | 21.551 | 5/25/2011 19:14:01 | 24.109 |
| 5/29/2011 22:42:01 | 21.363 | 5/25/2011 19:44:01 | 24.109 |
| 5/29/2011 23:12:01 | 21.301 | 5/25/2011 20:14:01 | 24.109 |
| 5/29/2011 23:42:01 | 21.113 | 5/25/2011 20:44:01 | 24.109 |
| 5/30/2011 00:12:01 | 20.925 | 5/25/2011 21:14:01 | 24.172 |
| 5/30/2011 00:42:01 | 20.988 | 5/25/2011 21:44:01 | 24.172 |
| 5/30/2011 01:12:01 | 21.488 | 5/25/2011 22:14:01 | 24.109 |
| 5/30/2011 01:42:01 | 21.864 | 5/25/2011 22:44:01 | 24.109 |
| 5/30/2011 02:12:01 | 22.427 | 5/25/2011 23:14:01 | 24.109 |
| 5/30/2011 02:42:01 | 22.427 | 5/25/2011 23:44:01 | 24.109 |
| 5/30/2011 03:12:01 | 22.239 | 5/26/2011 00:14:01 | 24.109 |
| 5/30/2011 03:42:01 | 22.364 | 5/26/2011 00:44:01 | 24.109 |
| 5/30/2011 04:12:01 | 22.302 | 5/26/2011 01:14:01 | 24.109 |
| 5/30/2011 04:42:01 | 22.114 | 5/26/2011 01:44:01 | 24.109 |
| 5/30/2011 05:12:01 | 22.051 | 5/26/2011 02:14:01 | 24.109 |
| 5/30/2011 05:42:01 | 21.926 | 5/26/2011 02:44:01 | 24.047 |
| 5/30/2011 06:12:01 | 21.676 | 5/26/2011 03:14:01 | 24.047 |
| 5/30/2011 06:42:01 | 21.551 | 5/26/2011 03:44:01 | 24.047 |
| 5/30/2011 07:12:01 | 21.739 | 5/26/2011 04:14:01 | 24.047 |
| 5/30/2011 07:42:01 | 22.364 | 5/26/2011 04:44:01 | 24.047 |
| 5/30/2011 08:12:01 | 23.365 | 5/26/2011 05:14:01 | 23.984 |
| 5/30/2011 08:42:01 | 24.427 | 5/26/2011 05:44:01 | 23.984 |
| 5/30/2011 09:12:01 | 25.677 | 5/26/2011 06:14:01 | 23.984 |

|                    |        |                    |        |
|--------------------|--------|--------------------|--------|
| 5/30/2011 09:42:01 | 27.115 | 5/26/2011 06:44:01 | 23.922 |
| 5/30/2011 10:12:01 | 28.551 | 5/26/2011 07:14:01 | 23.922 |
| 5/30/2011 10:42:01 | 29.738 | 5/26/2011 07:44:01 | 23.922 |
| 5/30/2011 11:12:01 | 30.425 | 5/26/2011 08:14:01 | 23.859 |
| 5/30/2011 11:42:01 | 30.986 | 5/26/2011 08:44:01 | 23.859 |
| 5/30/2011 12:12:01 | 30.924 | 5/26/2011 09:14:01 | 23.859 |
| 5/30/2011 12:42:01 | 31.299 | 5/26/2011 09:44:01 | 23.797 |
| 5/30/2011 13:12:01 | 31.860 | 5/26/2011 10:14:01 | 23.797 |
| 5/30/2011 13:42:01 | 31.673 | 5/26/2011 10:44:01 | 23.797 |
| 5/30/2011 14:12:01 | 32.048 | 5/26/2011 11:14:01 | 23.797 |
| 5/30/2011 14:42:01 | 31.361 | 5/26/2011 11:44:01 | 23.797 |
| 5/30/2011 15:12:01 | 29.800 | 5/26/2011 12:14:01 | 23.797 |
| 5/30/2011 15:42:01 | 28.614 | 5/26/2011 12:44:01 | 23.859 |
| 5/30/2011 16:12:01 | 27.489 | 5/26/2011 13:14:01 | 23.859 |
| 5/30/2011 16:42:01 | 26.365 | 5/26/2011 13:44:01 | 23.859 |
| 5/30/2011 17:12:01 | 25.365 | 5/26/2011 14:14:01 | 23.922 |
| 5/30/2011 17:42:01 | 24.365 | 5/26/2011 14:44:01 | 23.922 |
| 5/30/2011 18:12:01 | 23.365 | 5/26/2011 15:14:01 | 23.984 |
| 5/30/2011 18:42:01 | 22.427 | 5/26/2011 15:44:01 | 23.984 |
| 5/30/2011 19:12:01 | 21.676 | 5/26/2011 16:14:01 | 24.047 |
| 5/30/2011 19:42:01 | 21.051 | 5/26/2011 16:44:01 | 24.047 |
| 5/30/2011 20:12:01 | 20.863 | 5/26/2011 17:14:01 | 24.047 |
| 5/30/2011 20:42:01 | 20.738 | 5/26/2011 17:44:01 | 24.047 |
| 5/30/2011 21:12:01 | 20.675 | 5/26/2011 18:14:01 | 24.109 |
| 5/30/2011 21:42:01 | 20.925 | 5/26/2011 18:44:01 | 24.109 |
| 5/30/2011 22:12:01 | 20.925 | 5/26/2011 19:14:01 | 24.109 |
| 5/30/2011 22:42:01 | 20.863 | 5/26/2011 19:44:01 | 24.172 |
| 5/30/2011 23:12:01 | 20.988 | 5/26/2011 20:14:01 | 24.172 |
| 5/30/2011 23:42:01 | 20.925 | 5/26/2011 20:44:01 | 24.172 |
| 5/31/2011 00:12:01 | 20.863 | 5/26/2011 21:14:01 | 24.172 |
| 5/31/2011 00:42:01 | 20.738 | 5/26/2011 21:44:01 | 24.172 |
| 5/31/2011 01:12:01 | 20.550 | 5/26/2011 22:14:01 | 24.172 |
| 5/31/2011 01:42:01 | 20.425 | 5/26/2011 22:44:01 | 24.172 |
| 5/31/2011 02:12:01 | 20.237 | 5/26/2011 23:14:01 | 24.172 |
| 5/31/2011 02:42:01 | 20.175 | 5/26/2011 23:44:01 | 24.172 |
| 5/31/2011 03:12:01 | 20.425 | 5/27/2011 00:14:01 | 24.172 |
| 5/31/2011 03:42:01 | 20.175 | 5/27/2011 00:44:01 | 24.172 |
| 5/31/2011 04:12:01 | 19.987 | 5/27/2011 01:14:01 | 24.172 |
| 5/31/2011 04:42:01 | 19.674 | 5/27/2011 01:44:01 | 24.109 |
| 5/31/2011 05:12:01 | 19.611 | 5/27/2011 02:14:01 | 24.109 |
| 5/31/2011 05:42:01 | 19.799 | 5/27/2011 02:44:01 | 24.109 |
| 5/31/2011 06:12:01 | 19.737 | 5/27/2011 03:14:01 | 24.109 |
| 5/31/2011 06:42:01 | 19.486 | 5/27/2011 03:44:01 | 24.109 |
| 5/31/2011 07:12:01 | 19.987 | 5/27/2011 04:14:01 | 24.047 |
| 5/31/2011 07:42:01 | 21.238 | 5/27/2011 04:44:01 | 24.047 |
| 5/31/2011 08:12:01 | 22.427 | 5/27/2011 05:14:01 | 24.047 |
| 5/31/2011 08:42:01 | 23.802 | 5/27/2011 05:44:01 | 24.047 |
| 5/31/2011 09:12:01 | 25.240 | 5/27/2011 06:14:01 | 23.984 |
| 5/31/2011 09:42:01 | 26.927 | 5/27/2011 06:44:01 | 23.984 |
| 5/31/2011 10:12:01 | 28.864 | 5/27/2011 07:14:01 | 23.984 |

|                    |        |                    |        |
|--------------------|--------|--------------------|--------|
| 5/31/2011 10:42:01 | 29.925 | 5/27/2011 07:44:01 | 23.922 |
| 5/31/2011 11:12:01 | 30.612 | 5/27/2011 08:14:01 | 23.922 |
| 5/31/2011 11:42:01 | 31.236 | 5/27/2011 08:44:01 | 23.859 |
| 5/31/2011 12:12:01 | 31.611 | 5/27/2011 09:14:01 | 23.859 |
| 5/31/2011 12:42:01 | 32.110 | 5/27/2011 09:44:01 | 23.859 |
| 5/31/2011 13:12:01 | 32.110 | 5/27/2011 10:14:01 | 23.797 |
| 5/31/2011 13:42:01 | 32.110 | 5/27/2011 10:44:01 | 23.797 |
| 5/31/2011 14:12:01 | 32.048 | 5/27/2011 11:14:01 | 23.797 |
| 5/31/2011 14:42:01 | 31.486 | 5/27/2011 11:44:01 | 23.797 |
| 5/31/2011 15:12:01 | 30.175 | 5/27/2011 12:14:01 | 23.859 |
| 5/31/2011 15:42:01 | 28.489 | 5/27/2011 12:44:01 | 23.859 |
| 5/31/2011 16:12:01 | 27.240 | 5/27/2011 13:14:01 | 23.859 |
| 5/31/2011 16:42:01 | 26.115 | 5/27/2011 13:44:01 | 23.922 |
| 5/31/2011 17:12:01 | 25.052 | 5/27/2011 14:14:01 | 23.922 |
| 5/31/2011 17:42:01 | 24.115 | 5/27/2011 14:44:01 | 23.922 |
| 5/31/2011 18:12:01 | 23.240 | 5/27/2011 15:14:01 | 23.984 |
| 5/31/2011 18:42:01 | 22.239 | 5/27/2011 15:44:01 | 23.984 |
| 5/31/2011 19:12:01 | 21.363 | 5/27/2011 16:14:01 | 23.984 |
| 5/31/2011 19:42:01 | 20.675 | 5/27/2011 16:44:01 | 23.984 |
| 5/31/2011 20:12:01 | 20.300 | 5/27/2011 17:14:01 | 24.047 |
| 5/31/2011 20:42:01 | 19.799 | 5/27/2011 17:44:01 | 24.047 |
| 5/31/2011 21:12:01 | 19.549 | 5/27/2011 18:14:01 | 24.047 |
| 5/31/2011 21:42:01 | 20.112 | 5/27/2011 18:44:01 | 24.047 |
| 5/31/2011 22:12:01 | 20.050 | 5/27/2011 19:14:01 | 24.109 |
| 5/31/2011 22:42:01 | 19.361 | 5/27/2011 19:44:01 | 24.109 |
| 5/31/2011 23:12:01 | 19.111 | 5/27/2011 20:14:01 | 24.109 |
| 5/31/2011 23:42:01 | 19.048 | 5/27/2011 20:44:01 | 24.109 |
| 6/1/2011 00:12:01  | 18.923 | 5/27/2011 21:14:01 | 24.109 |
| 6/1/2011 00:42:01  | 18.735 | 5/27/2011 21:44:01 | 24.109 |
| 6/1/2011 01:12:01  | 18.422 | 5/27/2011 22:14:01 | 24.047 |
| 6/1/2011 01:42:01  | 18.360 | 5/27/2011 22:44:01 | 24.047 |
| 6/1/2011 02:12:01  | 18.235 | 5/27/2011 23:14:01 | 24.047 |
| 6/1/2011 02:42:01  | 18.109 | 5/27/2011 23:44:01 | 24.047 |
| 6/1/2011 03:12:01  | 17.922 | 5/28/2011 00:14:01 | 24.047 |
| 6/1/2011 03:42:01  | 17.796 | 5/28/2011 00:44:01 | 23.984 |
| 6/1/2011 04:12:01  | 17.734 | 5/28/2011 01:14:01 | 23.984 |
| 6/1/2011 04:42:01  | 17.609 | 5/28/2011 01:44:01 | 23.984 |
| 6/1/2011 05:12:01  | 17.483 | 5/28/2011 02:14:01 | 23.984 |
| 6/1/2011 05:42:01  | 17.358 | 5/28/2011 02:44:01 | 23.922 |
| 6/1/2011 06:12:01  | 17.358 | 5/28/2011 03:14:01 | 23.922 |
| 6/1/2011 06:42:01  | 17.421 | 5/28/2011 03:44:01 | 23.922 |
| 6/1/2011 07:12:01  | 18.297 | 5/28/2011 04:14:01 | 23.859 |
| 6/1/2011 07:42:01  | 19.799 | 5/28/2011 04:44:01 | 23.859 |
| 6/1/2011 08:12:01  | 21.238 | 5/28/2011 05:14:01 | 23.859 |
| 6/1/2011 08:42:01  | 23.240 | 5/28/2011 05:44:01 | 23.859 |
| 6/1/2011 09:12:01  | 25.240 | 5/28/2011 06:14:01 | 23.797 |
| 6/1/2011 09:42:01  | 26.740 | 5/28/2011 06:44:01 | 23.797 |
| 6/1/2011 10:12:01  | 28.426 | 5/28/2011 07:14:01 | 23.797 |
| 6/1/2011 10:42:01  | 29.426 | 5/28/2011 07:44:01 | 23.797 |
| 6/1/2011 11:12:01  | 30.175 | 5/28/2011 08:14:01 | 23.734 |

|                   |                           |        |
|-------------------|---------------------------|--------|
| 6/1/2011 11:42:01 | 30.737 5/28/2011 08:44:01 | 23.734 |
| 6/1/2011 12:12:01 | 31.236 5/28/2011 09:14:01 | 23.734 |
| 6/1/2011 12:42:01 | 31.735 5/28/2011 09:44:01 | 23.672 |
| 6/1/2011 13:12:01 | 31.923 5/28/2011 10:14:01 | 23.672 |
| 6/1/2011 13:42:01 | 31.860 5/28/2011 10:44:01 | 23.672 |
| 6/1/2011 14:12:01 | 31.860 5/28/2011 11:14:01 | 23.672 |
| 6/1/2011 14:42:01 | 31.423 5/28/2011 11:44:01 | 23.734 |
| 6/1/2011 15:12:01 | 30.425 5/28/2011 12:14:01 | 23.734 |
| 6/1/2011 15:42:01 | 28.426 5/28/2011 12:44:01 | 23.734 |
| 6/1/2011 16:12:01 | 27.052 5/28/2011 13:14:01 | 23.797 |
| 6/1/2011 16:42:01 | 25.740 5/28/2011 13:44:01 | 23.797 |
| 6/1/2011 17:12:01 | 24.865 5/28/2011 14:14:01 | 23.859 |
| 6/1/2011 17:42:01 | 23.677 5/28/2011 14:44:01 | 23.859 |
| 6/1/2011 18:12:01 | 22.552 5/28/2011 15:14:01 | 23.922 |
| 6/1/2011 18:42:01 | 21.551 5/28/2011 15:44:01 | 23.922 |
| 6/1/2011 19:12:01 | 20.925 5/28/2011 16:14:01 | 23.922 |
| 6/1/2011 19:42:01 | 20.237 5/28/2011 16:44:01 | 23.984 |
| 6/1/2011 20:12:01 | 19.674 5/28/2011 17:14:01 | 23.984 |
| 6/1/2011 20:42:01 | 19.299 5/28/2011 17:44:01 | 24.047 |
| 6/1/2011 21:12:01 | 19.111 5/28/2011 18:14:01 | 24.047 |
| 6/1/2011 21:42:01 | 19.611 5/28/2011 18:44:01 | 24.047 |
| 6/1/2011 22:12:01 | 19.236 5/28/2011 19:14:01 | 24.047 |
| 6/1/2011 22:42:01 | 19.048 5/28/2011 19:44:01 | 24.047 |
| 6/1/2011 23:12:01 | 18.798 5/28/2011 20:14:01 | 24.047 |
| 6/1/2011 23:42:01 | 18.735 5/28/2011 20:44:01 | 24.047 |
| 6/2/2011 00:12:01 | 18.860 5/28/2011 21:14:01 | 24.047 |
| 6/2/2011 00:42:01 | 18.735 5/28/2011 21:44:01 | 24.047 |
| 6/2/2011 01:12:01 | 18.610 5/28/2011 22:14:01 | 24.047 |
| 6/2/2011 01:42:01 | 18.360 5/28/2011 22:44:01 | 24.047 |
| 6/2/2011 02:12:01 | 18.047 5/28/2011 23:14:01 | 24.047 |
| 6/2/2011 02:42:01 | 17.796 5/28/2011 23:44:01 | 24.047 |
| 6/2/2011 03:12:01 | 17.671 5/29/2011 00:14:01 | 23.984 |
| 6/2/2011 03:42:01 | 17.421 5/29/2011 00:44:01 | 23.984 |
| 6/2/2011 04:12:01 | 17.421 5/29/2011 01:14:01 | 23.984 |
| 6/2/2011 04:42:01 | 17.358 5/29/2011 01:44:01 | 23.984 |
| 6/2/2011 05:12:01 | 17.296 5/29/2011 02:14:01 | 23.984 |
| 6/2/2011 05:42:01 | 17.296 5/29/2011 02:44:01 | 23.922 |
| 6/2/2011 06:12:01 | 16.920 5/29/2011 03:14:01 | 23.922 |
| 6/2/2011 06:42:01 | 16.857 5/29/2011 03:44:01 | 23.922 |
| 6/2/2011 07:12:01 | 17.296 5/29/2011 04:14:01 | 23.859 |
| 6/2/2011 07:42:01 | 18.923 5/29/2011 04:44:01 | 23.859 |
| 6/2/2011 08:12:01 | 20.738 5/29/2011 05:14:01 | 23.859 |
| 6/2/2011 08:42:01 | 22.864 5/29/2011 05:44:01 | 23.859 |
| 6/2/2011 09:12:01 | 24.615 5/29/2011 06:14:01 | 23.797 |
| 6/2/2011 09:42:01 | 26.115 5/29/2011 06:44:01 | 23.797 |
| 6/2/2011 10:12:01 | 27.989 5/29/2011 07:14:01 | 23.797 |
| 6/2/2011 10:42:01 | 29.051 5/29/2011 07:44:01 | 23.734 |
| 6/2/2011 11:12:01 | 29.925 5/29/2011 08:14:01 | 23.734 |
| 6/2/2011 11:42:01 | 30.549 5/29/2011 08:44:01 | 23.734 |
| 6/2/2011 12:12:01 | 31.174 5/29/2011 09:14:01 | 23.734 |

|                   |        |                    |        |
|-------------------|--------|--------------------|--------|
| 6/2/2011 12:42:01 | 31.361 | 5/29/2011 09:44:01 | 23.672 |
| 6/2/2011 13:12:01 | 31.486 | 5/29/2011 10:14:01 | 23.672 |
| 6/2/2011 13:42:01 | 31.299 | 5/29/2011 10:44:01 | 23.672 |
| 6/2/2011 14:12:01 | 31.673 | 5/29/2011 11:14:01 | 23.734 |
| 6/2/2011 14:42:01 | 31.299 | 5/29/2011 11:44:01 | 23.734 |
| 6/2/2011 15:12:01 | 30.549 | 5/29/2011 12:14:01 | 23.734 |
| 6/2/2011 15:59:01 | 28.095 | 5/29/2011 12:44:01 | 23.797 |
| 6/2/2011 16:39:01 | 26.596 | 5/29/2011 13:14:01 | 23.797 |
| 6/2/2011 17:19:01 | 25.472 | 5/29/2011 13:44:01 | 23.797 |
| 6/2/2011 17:59:01 | 24.222 | 5/29/2011 14:14:01 | 23.859 |
| 6/2/2011 18:39:01 | 23.597 | 5/29/2011 14:44:01 | 23.922 |
| 6/2/2011 19:19:01 | 23.284 | 5/29/2011 15:14:01 | 23.922 |
| 6/2/2011 19:59:01 | 23.097 | 5/29/2011 15:44:01 | 23.984 |
| 6/2/2011 20:39:01 | 22.534 | 5/29/2011 16:14:01 | 23.984 |
| 6/2/2011 21:19:01 | 21.595 | 5/29/2011 16:44:01 | 23.984 |
| 6/2/2011 21:59:01 | 20.532 | 5/29/2011 17:14:01 | 24.047 |
| 6/2/2011 22:39:01 | 19.718 | 5/29/2011 17:44:01 | 24.047 |
| 6/2/2011 23:19:01 | 19.092 | 5/29/2011 18:14:01 | 24.109 |
| 6/2/2011 23:59:01 | 18.341 | 5/29/2011 18:44:01 | 24.109 |
| 6/3/2011 00:39:01 | 18.466 | 5/29/2011 19:14:01 | 24.109 |
| 6/3/2011 01:19:01 | 17.965 | 5/29/2011 19:44:01 | 24.109 |
| 6/3/2011 01:59:01 | 17.339 | 5/29/2011 20:14:01 | 24.172 |
| 6/3/2011 02:39:01 | 16.900 | 5/29/2011 20:44:01 | 24.172 |
| 6/3/2011 03:19:01 | 16.837 | 5/29/2011 21:14:01 | 24.172 |
| 6/3/2011 03:59:01 | 16.712 | 5/29/2011 21:44:01 | 24.172 |
| 6/3/2011 04:39:01 | 16.274 | 5/29/2011 22:14:01 | 24.172 |
| 6/3/2011 05:19:01 | 15.647 | 5/29/2011 22:44:01 | 24.109 |
| 6/3/2011 05:59:01 | 15.584 | 5/29/2011 23:14:01 | 24.109 |
| 6/3/2011 06:39:01 | 15.271 | 5/29/2011 23:44:01 | 24.109 |
| 6/3/2011 07:19:01 | 16.211 | 5/30/2011 00:14:01 | 24.109 |
| 6/3/2011 07:59:01 | 18.341 | 5/30/2011 00:44:01 | 24.109 |
| 6/3/2011 08:39:01 | 21.095 | 5/30/2011 01:14:01 | 24.109 |
| 6/3/2011 09:19:01 | 23.784 | 5/30/2011 01:44:01 | 24.047 |
| 6/3/2011 09:59:01 | 26.159 | 5/30/2011 02:14:01 | 24.047 |
| 6/3/2011 10:39:01 | 27.783 | 5/30/2011 02:44:01 | 24.047 |
| 6/3/2011 11:19:01 | 29.344 | 5/30/2011 03:14:01 | 24.047 |
| 6/3/2011 11:59:01 | 30.030 | 5/30/2011 03:44:01 | 24.047 |
| 6/3/2011 12:39:01 | 30.654 | 5/30/2011 04:14:01 | 24.047 |
| 6/3/2011 13:19:01 | 30.841 | 5/30/2011 04:44:01 | 24.047 |
| 6/3/2011 13:59:01 | 31.028 | 5/30/2011 05:14:01 | 23.984 |
| 6/3/2011 14:39:01 | 30.717 | 5/30/2011 05:44:01 | 23.984 |
| 6/3/2011 15:19:01 | 29.843 | 5/30/2011 06:14:01 | 23.984 |
| 6/3/2011 15:59:01 | 28.407 | 5/30/2011 06:44:01 | 23.984 |
| 6/3/2011 16:39:01 | 26.472 | 5/30/2011 07:14:01 | 23.984 |
| 6/3/2011 17:19:01 | 24.222 | 5/30/2011 07:44:01 | 23.984 |
| 6/3/2011 17:59:01 | 22.534 | 5/30/2011 08:14:01 | 23.984 |
| 6/3/2011 18:39:01 | 21.032 | 5/30/2011 08:44:01 | 23.984 |
| 6/3/2011 19:19:01 | 20.031 | 5/30/2011 09:14:01 | 23.984 |
| 6/3/2011 19:59:01 | 20.344 | 5/30/2011 09:44:01 | 23.984 |
| 6/3/2011 20:39:01 | 20.469 | 5/30/2011 10:14:01 | 23.984 |

|                   |                           |        |
|-------------------|---------------------------|--------|
| 6/3/2011 21:19:01 | 20.156 5/30/2011 10:44:01 | 23.984 |
| 6/3/2011 21:59:01 | 20.344 5/30/2011 11:14:01 | 23.984 |
| 6/3/2011 22:39:01 | 20.031 5/30/2011 11:44:01 | 23.984 |
| 6/3/2011 23:19:01 | 19.343 5/30/2011 12:14:01 | 23.984 |
| 6/3/2011 23:59:01 | 18.716 5/30/2011 12:44:01 | 24.047 |
| 6/4/2011 00:39:01 | 18.278 5/30/2011 13:14:01 | 24.047 |
| 6/4/2011 01:19:01 | 17.339 5/30/2011 13:44:01 | 24.047 |
| 6/4/2011 01:59:01 | 16.587 5/30/2011 14:14:01 | 24.109 |
| 6/4/2011 02:39:01 | 16.086 5/30/2011 14:44:01 | 24.109 |
| 6/4/2011 03:19:01 | 15.584 5/30/2011 15:14:01 | 24.172 |
| 6/4/2011 03:59:01 | 15.145 5/30/2011 15:44:01 | 24.172 |
| 6/4/2011 04:39:01 | 15.145 5/30/2011 16:14:01 | 24.172 |
| 6/4/2011 05:19:01 | 15.647 5/30/2011 16:44:01 | 24.234 |
| 6/4/2011 05:59:01 | 15.522 5/30/2011 17:14:01 | 24.234 |
| 6/4/2011 06:39:01 | 15.271 5/30/2011 17:44:01 | 24.234 |
| 6/4/2011 07:19:01 | 15.960 5/30/2011 18:14:01 | 24.234 |
| 6/4/2011 07:59:01 | 18.466 5/30/2011 18:44:01 | 24.234 |
| 6/4/2011 08:39:01 | 22.033 5/30/2011 19:14:01 | 24.297 |
| 6/4/2011 09:19:01 | 24.597 5/30/2011 19:44:01 | 24.297 |
| 6/4/2011 09:59:01 | 26.846 5/30/2011 20:14:01 | 24.297 |
| 6/4/2011 10:39:01 | 28.283 5/30/2011 20:44:01 | 24.297 |
| 6/4/2011 11:19:01 | 29.531 5/30/2011 21:14:01 | 24.297 |
| 6/4/2011 11:59:01 | 30.217 5/30/2011 21:44:01 | 24.297 |
| 6/4/2011 12:39:01 | 30.467 5/30/2011 22:14:01 | 24.234 |
| 6/4/2011 13:19:01 | 30.467 5/30/2011 22:44:01 | 24.234 |
| 6/4/2011 13:59:01 | 30.841 5/30/2011 23:14:01 | 24.234 |
| 6/4/2011 14:39:01 | 30.093 5/30/2011 23:44:01 | 24.234 |
| 6/4/2011 15:19:01 | 29.469 5/31/2011 00:14:01 | 24.234 |
| 6/4/2011 15:59:01 | 28.158 5/31/2011 00:44:01 | 24.172 |
| 6/4/2011 16:39:01 | 25.847 5/31/2011 01:14:01 | 24.172 |
| 6/4/2011 17:19:01 | 23.784 5/31/2011 01:44:01 | 24.172 |
| 6/4/2011 17:59:01 | 22.158 5/31/2011 02:14:01 | 24.172 |
| 6/4/2011 18:39:01 | 20.532 5/31/2011 02:44:01 | 24.109 |
| 6/4/2011 19:19:01 | 19.155 5/31/2011 03:14:01 | 24.109 |
| 6/4/2011 19:59:01 | 18.215 5/31/2011 03:44:01 | 24.109 |
| 6/4/2011 20:39:01 | 17.652 5/31/2011 04:14:01 | 24.109 |
| 6/4/2011 21:19:01 | 17.025 5/31/2011 04:44:01 | 24.047 |
| 6/4/2011 21:59:01 | 16.462 5/31/2011 05:14:01 | 24.047 |
| 6/4/2011 22:39:01 | 16.587 5/31/2011 05:44:01 | 24.047 |
| 6/4/2011 23:19:01 | 17.777 5/31/2011 06:14:01 | 24.047 |
| 6/4/2011 23:59:01 | 18.215 5/31/2011 06:44:01 | 23.984 |
| 6/5/2011 00:39:01 | 18.842 5/31/2011 07:14:01 | 23.984 |
| 6/5/2011 01:19:01 | 18.466 5/31/2011 07:44:01 | 23.984 |
| 6/5/2011 01:59:01 | 17.714 5/31/2011 08:14:01 | 23.984 |
| 6/5/2011 02:39:01 | 16.900 5/31/2011 08:44:01 | 23.984 |
| 6/5/2011 03:19:01 | 16.900 5/31/2011 09:14:01 | 23.922 |
| 6/5/2011 03:59:01 | 16.023 5/31/2011 09:44:01 | 23.922 |
| 6/5/2011 04:39:01 | 14.832 5/31/2011 10:14:01 | 23.922 |
| 6/5/2011 05:19:01 | 14.330 5/31/2011 10:44:01 | 23.922 |
| 6/5/2011 05:59:01 | 13.641 5/31/2011 11:14:01 | 23.922 |

|                   |                           |        |
|-------------------|---------------------------|--------|
| 6/5/2011 06:39:01 | 13.327 5/31/2011 11:44:01 | 23.922 |
| 6/5/2011 07:19:01 | 14.330 5/31/2011 12:14:01 | 23.922 |
| 6/5/2011 07:59:01 | 16.837 5/31/2011 12:44:01 | 23.984 |
| 6/5/2011 08:39:01 | 20.094 5/31/2011 13:14:01 | 23.984 |
| 6/5/2011 09:19:01 | 23.722 5/31/2011 13:44:01 | 23.984 |
| 6/5/2011 09:59:01 | 26.659 5/31/2011 14:14:01 | 24.047 |
| 6/5/2011 10:39:01 | 28.407 5/31/2011 14:44:01 | 24.047 |
| 6/5/2011 11:19:01 | 29.781 5/31/2011 15:14:01 | 24.047 |
| 6/5/2011 11:59:01 | 30.592 5/31/2011 15:44:01 | 24.109 |
| 6/5/2011 12:39:01 | 29.968 5/31/2011 16:14:01 | 24.109 |
| 6/5/2011 13:19:01 | 29.843 5/31/2011 16:44:01 | 24.109 |
| 6/5/2011 13:59:01 | 30.529 5/31/2011 17:14:01 | 24.172 |
| 6/5/2011 14:39:01 | 28.720 5/31/2011 17:44:01 | 24.172 |
| 6/5/2011 15:19:01 | 27.721 5/31/2011 18:14:01 | 24.172 |
| 6/5/2011 15:59:01 | 27.533 5/31/2011 18:44:01 | 24.172 |
| 6/5/2011 16:39:01 | 26.034 5/31/2011 19:14:01 | 24.234 |
| 6/5/2011 17:19:01 | 24.659 5/31/2011 19:44:01 | 24.234 |
| 6/5/2011 17:59:01 | 23.597 5/31/2011 20:14:01 | 24.234 |
| 6/5/2011 18:39:01 | 22.534 5/31/2011 20:44:01 | 24.234 |
| 6/5/2011 19:19:01 | 21.971 5/31/2011 21:14:01 | 24.234 |
| 6/5/2011 19:59:01 | 21.095 5/31/2011 21:44:01 | 24.172 |
| 6/5/2011 20:39:01 | 20.594 5/31/2011 22:14:01 | 24.172 |
| 6/5/2011 21:19:01 | 20.657 5/31/2011 22:44:01 | 24.172 |
| 6/5/2011 21:59:01 | 20.719 5/31/2011 23:14:01 | 24.172 |
| 6/5/2011 22:39:01 | 21.032 5/31/2011 23:44:01 | 24.109 |
| 6/5/2011 23:19:01 | 20.719 6/1/2011 00:14:01  | 24.109 |
| 6/5/2011 23:59:01 | 20.970 6/1/2011 00:44:01  | 24.109 |
| 6/6/2011 00:39:01 | 21.408 6/1/2011 01:14:01  | 24.047 |
| 6/6/2011 01:19:01 | 21.783 6/1/2011 01:44:01  | 24.047 |
| 6/6/2011 01:59:01 | 21.908 6/1/2011 02:14:01  | 24.047 |
| 6/6/2011 02:39:01 | 20.970 6/1/2011 02:44:01  | 23.984 |
| 6/6/2011 03:19:01 | 19.530 6/1/2011 03:14:01  | 23.984 |
| 6/6/2011 03:59:01 | 18.529 6/1/2011 03:44:01  | 23.984 |
| 6/6/2011 04:39:01 | 17.777 6/1/2011 04:14:01  | 23.922 |
| 6/6/2011 05:19:01 | 17.339 6/1/2011 04:44:01  | 23.922 |
| 6/6/2011 05:59:01 | 16.963 6/1/2011 05:14:01  | 23.922 |
| 6/6/2011 06:39:01 | 16.399 6/1/2011 05:44:01  | 23.859 |
| 6/6/2011 07:19:01 | 17.088 6/1/2011 06:14:01  | 23.859 |
| 6/6/2011 07:59:01 | 19.029 6/1/2011 06:44:01  | 23.859 |
| 6/6/2011 08:39:01 | 21.595 6/1/2011 07:14:01  | 23.797 |
| 6/6/2011 09:19:01 | 24.097 6/1/2011 07:44:01  | 23.797 |
| 6/6/2011 09:59:01 | 26.909 6/1/2011 08:14:01  | 23.734 |
| 6/6/2011 10:39:01 | 28.532 6/1/2011 08:44:01  | 23.734 |
| 6/6/2011 11:19:01 | 29.656 6/1/2011 09:14:01  | 23.734 |
| 6/6/2011 11:59:01 | 29.968 6/1/2011 09:44:01  | 23.734 |
| 6/6/2011 12:39:01 | 30.592 6/1/2011 10:14:01  | 23.672 |
| 6/6/2011 13:19:01 | 30.779 6/1/2011 10:44:01  | 23.672 |
| 6/6/2011 13:59:01 | 30.654 6/1/2011 11:14:01  | 23.672 |
| 6/6/2011 14:39:01 | 30.405 6/1/2011 11:44:01  | 23.734 |
| 6/6/2011 15:19:01 | 29.219 6/1/2011 12:14:01  | 23.734 |



|                   |        |                   |        |
|-------------------|--------|-------------------|--------|
| 6/6/2011 15:59:01 | 27.283 | 6/1/2011 12:44:01 | 23.734 |
| 6/6/2011 16:39:01 | 25.722 | 6/1/2011 13:14:01 | 23.797 |
| 6/6/2011 17:19:01 | 24.222 | 6/1/2011 13:44:01 | 23.797 |
| 6/6/2011 17:59:01 | 22.971 | 6/1/2011 14:14:01 | 23.797 |
| 6/6/2011 18:39:01 | 21.721 | 6/1/2011 14:44:01 | 23.859 |
| 6/6/2011 19:19:01 | 20.970 | 6/1/2011 15:14:01 | 23.859 |
| 6/6/2011 19:59:01 | 20.782 | 6/1/2011 15:44:01 | 23.922 |
| 6/6/2011 20:39:01 | 20.094 | 6/1/2011 16:14:01 | 23.922 |
| 6/6/2011 21:19:01 | 19.843 | 6/1/2011 16:44:01 | 23.922 |
| 6/6/2011 21:59:01 | 19.468 | 6/1/2011 17:14:01 | 23.984 |
| 6/6/2011 22:39:01 | 19.280 | 6/1/2011 17:44:01 | 23.984 |
| 6/6/2011 23:19:01 | 18.904 | 6/1/2011 18:14:01 | 23.984 |
| 6/6/2011 23:59:01 | 18.654 | 6/1/2011 18:44:01 | 23.984 |
| 6/7/2011 00:39:01 | 18.090 | 6/1/2011 19:14:01 | 24.047 |
| 6/7/2011 01:19:01 | 17.589 | 6/1/2011 19:44:01 | 24.047 |
| 6/7/2011 01:59:01 | 17.401 | 6/1/2011 20:14:01 | 24.047 |
| 6/7/2011 02:39:01 | 17.902 | 6/1/2011 20:44:01 | 24.047 |
| 6/7/2011 03:19:01 | 18.090 | 6/1/2011 21:14:01 | 24.047 |
| 6/7/2011 03:59:01 | 18.153 | 6/1/2011 21:44:01 | 23.984 |
| 6/7/2011 04:39:01 | 17.088 | 6/1/2011 22:14:01 | 23.984 |
| 6/7/2011 05:19:01 | 16.086 | 6/1/2011 22:44:01 | 23.984 |
| 6/7/2011 05:59:01 | 15.647 | 6/1/2011 23:14:01 | 23.984 |
| 6/7/2011 06:39:01 | 15.396 | 6/1/2011 23:44:01 | 23.984 |
| 6/7/2011 07:19:01 | 16.086 | 6/2/2011 00:14:01 | 23.922 |
| 6/7/2011 07:59:01 | 18.403 | 6/2/2011 00:44:01 | 23.922 |
| 6/7/2011 08:39:01 | 21.533 | 6/2/2011 01:14:01 | 23.922 |
| 6/7/2011 09:19:01 | 24.159 | 6/2/2011 01:44:01 | 23.859 |
| 6/7/2011 09:59:01 | 26.472 | 6/2/2011 02:14:01 | 23.859 |
| 6/7/2011 10:39:01 | 28.283 | 6/2/2011 02:44:01 | 23.859 |
| 6/7/2011 11:19:01 | 29.531 | 6/2/2011 03:14:01 | 23.797 |
| 6/7/2011 11:59:01 | 29.843 | 6/2/2011 03:44:01 | 23.797 |
| 6/7/2011 12:39:01 | 30.779 | 6/2/2011 04:14:01 | 23.797 |
| 6/7/2011 13:19:01 | 31.091 | 6/2/2011 04:44:01 | 23.734 |
| 6/7/2011 13:59:01 | 31.091 | 6/2/2011 05:14:01 | 23.734 |
| 6/7/2011 14:39:01 | 30.717 | 6/2/2011 05:44:01 | 23.734 |
| 6/7/2011 15:19:01 | 29.531 | 6/2/2011 06:14:01 | 23.672 |
| 6/7/2011 15:59:01 | 28.095 | 6/2/2011 06:44:01 | 23.672 |
| 6/7/2011 16:39:01 | 26.347 | 6/2/2011 07:14:01 | 23.672 |
| 6/7/2011 17:19:01 | 25.097 | 6/2/2011 07:44:01 | 23.609 |
| 6/7/2011 17:59:01 | 23.847 | 6/2/2011 08:14:01 | 23.609 |
| 6/7/2011 18:39:01 | 23.409 | 6/2/2011 08:44:01 | 23.609 |
| 6/7/2011 19:19:01 | 23.659 | 6/2/2011 09:14:01 | 23.547 |
| 6/7/2011 19:59:01 | 23.659 | 6/2/2011 09:44:01 | 23.547 |
| 6/7/2011 20:39:01 | 23.597 | 6/2/2011 10:14:01 | 23.547 |
| 6/7/2011 21:19:01 | 23.284 | 6/2/2011 10:44:01 | 23.547 |
| 6/7/2011 21:59:01 | 22.346 | 6/2/2011 11:14:01 | 23.547 |
| 6/7/2011 22:39:01 | 21.595 | 6/2/2011 11:44:01 | 23.547 |
| 6/7/2011 23:19:01 | 21.408 | 6/2/2011 12:14:01 | 23.547 |
| 6/7/2011 23:59:01 | 21.095 | 6/2/2011 12:44:01 | 23.547 |
| 6/8/2011 00:39:01 | 19.906 | 6/2/2011 13:14:01 | 23.547 |

|                   |        |                   |        |
|-------------------|--------|-------------------|--------|
| 6/8/2011 01:19:01 | 19.155 | 6/2/2011 13:44:01 | 23.609 |
| 6/8/2011 01:59:01 | 17.902 | 6/2/2011 14:14:01 | 23.609 |
| 6/8/2011 02:39:01 | 17.652 | 6/2/2011 14:44:01 | 23.672 |
| 6/8/2011 03:19:01 | 17.464 | 6/2/2011 15:14:01 | 23.672 |
| 6/8/2011 03:59:01 | 16.963 | 6/2/2011 15:44:01 | 23.672 |
| 6/8/2011 04:39:01 | 16.712 | 6/2/2011 16:39:01 | 24.859 |
| 6/8/2011 05:19:01 | 16.274 | 6/2/2011 17:19:01 | 24.484 |
| 6/8/2011 05:59:01 | 16.274 | 6/2/2011 17:59:01 | 24.359 |
| 6/8/2011 06:39:01 | 16.649 | 6/2/2011 18:39:01 | 24.359 |
| 6/8/2011 07:19:01 | 17.652 | 6/2/2011 19:19:01 | 24.297 |
| 6/8/2011 07:59:01 | 20.281 | 6/2/2011 19:59:01 | 24.297 |
| 6/8/2011 08:39:01 | 22.846 | 6/2/2011 20:39:01 | 24.297 |
| 6/8/2011 09:19:01 | 24.659 | 6/2/2011 21:19:01 | 24.297 |
| 6/8/2011 09:59:01 | 26.534 | 6/2/2011 21:59:01 | 24.297 |
| 6/8/2011 10:39:01 | 28.345 | 6/2/2011 22:39:01 | 24.297 |
| 6/8/2011 11:19:01 | 29.157 | 6/2/2011 23:19:01 | 24.297 |
| 6/8/2011 11:59:01 | 29.718 | 6/2/2011 23:59:01 | 24.297 |
| 6/8/2011 12:39:01 | 30.155 | 6/3/2011 00:39:01 | 24.297 |
| 6/8/2011 13:19:01 | 30.342 | 6/3/2011 01:19:01 | 24.234 |
| 6/8/2011 13:59:01 | 30.529 | 6/3/2011 01:59:01 | 24.234 |
| 6/8/2011 14:39:01 | 30.093 | 6/3/2011 02:39:01 | 24.234 |
| 6/8/2011 15:19:01 | 28.969 | 6/3/2011 03:19:01 | 24.234 |
| 6/8/2011 15:59:01 | 27.283 | 6/3/2011 03:59:01 | 24.172 |
| 6/8/2011 16:39:01 | 25.222 | 6/3/2011 04:39:01 | 24.172 |
| 6/8/2011 17:19:01 | 23.409 | 6/3/2011 05:19:01 | 24.109 |
| 6/8/2011 17:59:01 | 21.658 | 6/3/2011 05:59:01 | 24.109 |
| 6/8/2011 18:39:01 | 20.219 | 6/3/2011 06:39:01 | 24.047 |
| 6/8/2011 19:19:01 | 19.718 | 6/3/2011 07:19:01 | 24.047 |
| 6/8/2011 19:59:01 | 18.904 | 6/3/2011 07:59:01 | 24.047 |
| 6/8/2011 20:39:01 | 18.842 | 6/3/2011 08:39:01 | 23.984 |
| 6/8/2011 21:19:01 | 19.217 | 6/3/2011 09:19:01 | 23.922 |
| 6/8/2011 21:59:01 | 18.967 | 6/3/2011 09:59:01 | 23.922 |
| 6/8/2011 22:39:01 | 19.405 | 6/3/2011 10:39:01 | 23.859 |
| 6/8/2011 23:19:01 | 18.591 | 6/3/2011 11:19:01 | 23.859 |
| 6/8/2011 23:59:01 | 18.278 | 6/3/2011 11:59:01 | 23.859 |
| 6/9/2011 00:39:01 | 18.090 | 6/3/2011 12:39:01 | 23.797 |
| 6/9/2011 01:19:01 | 17.840 | 6/3/2011 13:19:01 | 23.797 |
| 6/9/2011 01:59:01 | 17.965 | 6/3/2011 13:59:01 | 23.797 |
| 6/9/2011 02:39:01 | 16.649 | 6/3/2011 14:39:01 | 23.859 |
| 6/9/2011 03:19:01 | 16.023 | 6/3/2011 15:19:01 | 23.859 |
| 6/9/2011 03:59:01 | 16.148 | 6/3/2011 15:59:01 | 23.859 |
| 6/9/2011 04:39:01 | 15.898 | 6/3/2011 16:39:01 | 23.859 |
| 6/9/2011 05:19:01 | 15.772 | 6/3/2011 17:19:01 | 23.922 |
| 6/9/2011 05:59:01 | 15.396 | 6/3/2011 17:59:01 | 23.922 |
| 6/9/2011 06:39:01 | 15.271 | 6/3/2011 18:39:01 | 23.922 |
| 6/9/2011 07:19:01 | 16.086 | 6/3/2011 19:19:01 | 23.984 |
| 6/9/2011 07:59:01 | 18.341 | 6/3/2011 19:59:01 | 23.984 |
| 6/9/2011 08:39:01 | 21.846 | 6/3/2011 20:39:01 | 23.984 |
| 6/9/2011 09:19:01 | 24.034 | 6/3/2011 21:19:01 | 23.984 |
| 6/9/2011 09:59:01 | 26.347 | 6/3/2011 21:59:01 | 23.984 |

|                    |        |                   |        |
|--------------------|--------|-------------------|--------|
| 6/9/2011 10:39:01  | 27.970 | 6/3/2011 22:39:01 | 23.984 |
| 6/9/2011 11:19:01  | 28.844 | 6/3/2011 23:19:01 | 23.984 |
| 6/9/2011 11:59:01  | 29.718 | 6/3/2011 23:59:01 | 23.984 |
| 6/9/2011 12:39:01  | 30.342 | 6/4/2011 00:39:01 | 23.984 |
| 6/9/2011 13:19:01  | 30.592 | 6/4/2011 01:19:01 | 23.984 |
| 6/9/2011 13:59:01  | 30.342 | 6/4/2011 01:59:01 | 23.984 |
| 6/9/2011 14:39:01  | 28.844 | 6/4/2011 02:39:01 | 23.984 |
| 6/9/2011 15:19:01  | 28.720 | 6/4/2011 03:19:01 | 23.922 |
| 6/9/2011 15:59:01  | 28.720 | 6/4/2011 03:59:01 | 23.922 |
| 6/9/2011 16:39:01  | 26.534 | 6/4/2011 04:39:01 | 23.922 |
| 6/9/2011 17:19:01  | 25.222 | 6/4/2011 05:19:01 | 23.859 |
| 6/9/2011 17:59:01  | 23.534 | 6/4/2011 05:59:01 | 23.859 |
| 6/9/2011 18:39:01  | 22.409 | 6/4/2011 06:39:01 | 23.859 |
| 6/9/2011 19:19:01  | 21.095 | 6/4/2011 07:19:01 | 23.797 |
| 6/9/2011 19:59:01  | 19.968 | 6/4/2011 07:59:01 | 23.797 |
| 6/9/2011 20:39:01  | 19.217 | 6/4/2011 08:39:01 | 23.734 |
| 6/9/2011 21:19:01  | 18.466 | 6/4/2011 09:19:01 | 23.734 |
| 6/9/2011 21:59:01  | 17.714 | 6/4/2011 09:59:01 | 23.672 |
| 6/9/2011 22:39:01  | 17.151 | 6/4/2011 10:39:01 | 23.672 |
| 6/9/2011 23:19:01  | 16.524 | 6/4/2011 11:19:01 | 23.609 |
| 6/9/2011 23:59:01  | 16.023 | 6/4/2011 11:59:01 | 23.609 |
| 6/10/2011 00:39:01 | 15.647 | 6/4/2011 12:39:01 | 23.609 |
| 6/10/2011 01:19:01 | 15.208 | 6/4/2011 13:19:01 | 23.609 |
| 6/10/2011 01:59:01 | 14.895 | 6/4/2011 13:59:01 | 23.609 |
| 6/10/2011 02:39:01 | 14.581 | 6/4/2011 14:39:01 | 23.609 |
| 6/10/2011 03:19:01 | 14.330 | 6/4/2011 15:19:01 | 23.672 |
| 6/10/2011 03:59:01 | 14.080 | 6/4/2011 15:59:01 | 23.672 |
| 6/10/2011 04:39:01 | 13.892 | 6/4/2011 16:39:01 | 23.672 |
| 6/10/2011 05:19:01 | 13.892 | 6/4/2011 17:19:01 | 23.734 |
| 6/10/2011 05:59:01 | 13.703 | 6/4/2011 17:59:01 | 23.734 |
| 6/10/2011 06:39:01 | 13.829 | 6/4/2011 18:39:01 | 23.734 |
| 6/10/2011 07:19:01 | 14.707 | 6/4/2011 19:19:01 | 23.797 |
| 6/10/2011 07:59:01 | 16.900 | 6/4/2011 19:59:01 | 23.797 |
| 6/10/2011 08:39:01 | 20.094 | 6/4/2011 20:39:01 | 23.797 |
| 6/10/2011 09:19:01 | 23.347 | 6/4/2011 21:19:01 | 23.859 |
| 6/10/2011 09:59:01 | 26.409 | 6/4/2011 21:59:01 | 23.859 |
| 6/10/2011 10:39:01 | 28.720 | 6/4/2011 22:39:01 | 23.859 |
| 6/10/2011 11:19:01 | 30.030 | 6/4/2011 23:19:01 | 23.859 |
| 6/10/2011 11:59:01 | 30.405 | 6/4/2011 23:59:01 | 23.797 |
| 6/10/2011 12:39:01 | 30.779 | 6/5/2011 00:39:01 | 23.797 |
| 6/10/2011 13:19:01 | 30.904 | 6/5/2011 01:19:01 | 23.797 |
| 6/10/2011 13:59:01 | 30.717 | 6/5/2011 01:59:01 | 23.797 |
| 6/10/2011 14:39:01 | 30.093 | 6/5/2011 02:39:01 | 23.797 |
| 6/10/2011 15:19:01 | 27.408 | 6/5/2011 03:19:01 | 23.734 |
| 6/10/2011 15:59:01 | 26.596 | 6/5/2011 03:59:01 | 23.734 |
| 6/10/2011 16:39:01 | 25.722 | 6/5/2011 04:39:01 | 23.672 |
| 6/10/2011 17:19:01 | 23.847 | 6/5/2011 05:19:01 | 23.672 |
| 6/10/2011 17:59:01 | 22.409 | 6/5/2011 05:59:01 | 23.609 |
| 6/10/2011 18:39:01 | 21.345 | 6/5/2011 06:39:01 | 23.609 |
| 6/10/2011 19:19:01 | 20.594 | 6/5/2011 07:19:01 | 23.547 |

|                    |        |                   |        |
|--------------------|--------|-------------------|--------|
| 6/10/2011 19:59:01 | 19.781 | 6/5/2011 07:59:01 | 23.547 |
| 6/10/2011 20:39:01 | 19.405 | 6/5/2011 08:39:01 | 23.484 |
| 6/10/2011 21:19:01 | 19.029 | 6/5/2011 09:19:01 | 23.484 |
| 6/10/2011 21:59:01 | 19.155 | 6/5/2011 09:59:01 | 23.421 |
| 6/10/2011 22:39:01 | 18.842 | 6/5/2011 10:39:01 | 23.421 |
| 6/10/2011 23:19:01 | 18.341 | 6/5/2011 11:19:01 | 23.359 |
| 6/10/2011 23:59:01 | 18.341 | 6/5/2011 11:59:01 | 23.359 |
| 6/11/2011 00:39:01 | 18.090 | 6/5/2011 12:39:01 | 23.359 |
| 6/11/2011 01:19:01 | 17.589 | 6/5/2011 13:19:01 | 23.359 |
| 6/11/2011 01:59:01 | 17.151 | 6/5/2011 13:59:01 | 23.359 |
| 6/11/2011 02:39:01 | 16.712 | 6/5/2011 14:39:01 | 23.359 |
| 6/11/2011 03:19:01 | 16.462 | 6/5/2011 15:19:01 | 23.421 |
| 6/11/2011 03:59:01 | 16.148 | 6/5/2011 15:59:01 | 23.421 |
| 6/11/2011 04:39:01 | 16.023 | 6/5/2011 16:39:01 | 23.421 |
| 6/11/2011 05:19:01 | 15.584 | 6/5/2011 17:19:01 | 23.484 |
| 6/11/2011 05:59:01 | 15.333 | 6/5/2011 17:59:01 | 23.547 |
| 6/11/2011 06:39:01 | 14.957 | 6/5/2011 18:39:01 | 23.547 |
| 6/11/2011 07:19:01 | 15.835 | 6/5/2011 19:19:01 | 23.609 |
| 6/11/2011 07:59:01 | 18.278 | 6/5/2011 19:59:01 | 23.609 |
| 6/11/2011 08:39:01 | 21.032 | 6/5/2011 20:39:01 | 23.609 |
| 6/11/2011 09:19:01 | 23.722 | 6/5/2011 21:19:01 | 23.672 |
| 6/11/2011 09:59:01 | 26.222 | 6/5/2011 21:59:01 | 23.672 |
| 6/11/2011 10:39:01 | 28.844 | 6/5/2011 22:39:01 | 23.734 |
| 6/11/2011 11:19:01 | 29.718 | 6/5/2011 23:19:01 | 23.734 |
| 6/11/2011 11:59:01 | 30.342 | 6/5/2011 23:59:01 | 23.734 |
| 6/11/2011 12:39:01 | 31.028 | 6/6/2011 00:39:01 | 23.734 |
| 6/11/2011 13:19:01 | 31.216 | 6/6/2011 01:19:01 | 23.734 |
| 6/11/2011 13:59:01 | 31.278 | 6/6/2011 01:59:01 | 23.734 |
| 6/11/2011 14:39:01 | 30.717 | 6/6/2011 02:39:01 | 23.734 |
| 6/11/2011 15:19:01 | 29.469 | 6/6/2011 03:19:01 | 23.734 |
| 6/11/2011 15:59:01 | 27.596 | 6/6/2011 03:59:01 | 23.734 |
| 6/11/2011 16:39:01 | 25.659 | 6/6/2011 04:39:01 | 23.734 |
| 6/11/2011 17:19:01 | 23.909 | 6/6/2011 05:19:01 | 23.734 |
| 6/11/2011 17:59:01 | 22.033 | 6/6/2011 05:59:01 | 23.734 |
| 6/11/2011 18:39:01 | 20.845 | 6/6/2011 06:39:01 | 23.734 |
| 6/11/2011 19:19:01 | 20.156 | 6/6/2011 07:19:01 | 23.734 |
| 6/11/2011 19:59:01 | 20.344 | 6/6/2011 07:59:01 | 23.672 |
| 6/11/2011 20:39:01 | 20.594 | 6/6/2011 08:39:01 | 23.672 |
| 6/11/2011 21:19:01 | 20.907 | 6/6/2011 09:19:01 | 23.609 |
| 6/11/2011 21:59:01 | 21.095 | 6/6/2011 09:59:01 | 23.609 |
| 6/11/2011 22:39:01 | 20.657 | 6/6/2011 10:39:01 | 23.609 |
| 6/11/2011 23:19:01 | 20.219 | 6/6/2011 11:19:01 | 23.609 |
| 6/11/2011 23:59:01 | 20.281 | 6/6/2011 11:59:01 | 23.547 |
| 6/12/2011 00:39:01 | 20.532 | 6/6/2011 12:39:01 | 23.547 |
| 6/12/2011 01:19:01 | 20.344 | 6/6/2011 13:19:01 | 23.547 |
| 6/12/2011 01:59:01 | 19.718 | 6/6/2011 13:59:01 | 23.609 |
| 6/12/2011 02:39:01 | 18.904 | 6/6/2011 14:39:01 | 23.609 |
| 6/12/2011 03:19:01 | 18.654 | 6/6/2011 15:19:01 | 23.609 |
| 6/12/2011 03:59:01 | 18.779 | 6/6/2011 15:59:01 | 23.609 |
| 6/12/2011 04:39:01 | 18.779 | 6/6/2011 16:39:01 | 23.672 |

|                    |        |                   |        |
|--------------------|--------|-------------------|--------|
| 6/12/2011 05:19:01 | 18.716 | 6/6/2011 17:19:01 | 23.672 |
| 6/12/2011 05:59:01 | 18.090 | 6/6/2011 17:59:01 | 23.672 |
| 6/12/2011 06:39:01 | 17.464 | 6/6/2011 18:39:01 | 23.734 |
| 6/12/2011 07:19:01 | 17.902 | 6/6/2011 19:19:01 | 23.734 |
| 6/12/2011 07:59:01 | 19.718 | 6/6/2011 19:59:01 | 23.734 |
| 6/12/2011 08:39:01 | 22.158 | 6/6/2011 20:39:01 | 23.797 |
| 6/12/2011 09:19:01 | 24.347 | 6/6/2011 21:19:01 | 23.797 |
| 6/12/2011 09:59:01 | 26.846 | 6/6/2011 21:59:01 | 23.797 |
| 6/12/2011 10:39:01 | 28.532 | 6/6/2011 22:39:01 | 23.797 |
| 6/12/2011 11:19:01 | 29.219 | 6/6/2011 23:19:01 | 23.797 |
| 6/12/2011 11:59:01 | 29.905 | 6/6/2011 23:59:01 | 23.797 |
| 6/12/2011 12:39:01 | 30.467 | 6/7/2011 00:39:01 | 23.797 |
| 6/12/2011 13:19:01 | 30.717 | 6/7/2011 01:19:01 | 23.797 |
| 6/12/2011 13:59:01 | 30.717 | 6/7/2011 01:59:01 | 23.797 |
| 6/12/2011 14:39:01 | 30.405 | 6/7/2011 02:39:01 | 23.797 |
| 6/12/2011 15:19:01 | 29.469 | 6/7/2011 03:19:01 | 23.734 |
| 6/12/2011 15:59:01 | 27.283 | 6/7/2011 03:59:01 | 23.734 |
| 6/12/2011 16:39:01 | 25.222 | 6/7/2011 04:39:01 | 23.734 |
| 6/12/2011 17:19:01 | 23.472 | 6/7/2011 05:19:01 | 23.734 |
| 6/12/2011 17:59:01 | 21.846 | 6/7/2011 05:59:01 | 23.672 |
| 6/12/2011 18:39:01 | 20.532 | 6/7/2011 06:39:01 | 23.672 |
| 6/12/2011 19:19:01 | 19.530 | 6/7/2011 07:19:01 | 23.672 |
| 6/12/2011 19:59:01 | 18.779 | 6/7/2011 07:59:01 | 23.609 |
| 6/12/2011 20:39:01 | 18.403 | 6/7/2011 08:39:01 | 23.609 |
| 6/12/2011 21:19:01 | 18.028 | 6/7/2011 09:19:01 | 23.547 |
| 6/12/2011 21:59:01 | 17.902 | 6/7/2011 09:59:01 | 23.547 |
| 6/12/2011 22:39:01 | 17.589 | 6/7/2011 10:39:01 | 23.547 |
| 6/12/2011 23:19:01 | 17.276 | 6/7/2011 11:19:01 | 23.484 |
| 6/12/2011 23:59:01 | 16.712 | 6/7/2011 11:59:01 | 23.484 |
| 6/13/2011 00:39:01 | 16.336 | 6/7/2011 12:39:01 | 23.484 |
| 6/13/2011 01:19:01 | 16.148 | 6/7/2011 13:19:01 | 23.484 |
| 6/13/2011 01:59:01 | 15.710 | 6/7/2011 13:59:01 | 23.484 |
| 6/13/2011 02:39:01 | 15.271 | 6/7/2011 14:39:01 | 23.484 |
| 6/13/2011 03:19:01 | 15.271 | 6/7/2011 15:19:01 | 23.547 |
| 6/13/2011 03:59:01 | 15.960 | 6/7/2011 15:59:01 | 23.547 |
| 6/13/2011 04:39:01 | 16.211 | 6/7/2011 16:39:01 | 23.547 |
| 6/13/2011 05:19:01 | 16.399 | 6/7/2011 17:19:01 | 23.609 |
| 6/13/2011 05:59:01 | 16.023 | 6/7/2011 17:59:01 | 23.609 |
| 6/13/2011 06:39:01 | 15.835 | 6/7/2011 18:39:01 | 23.672 |
| 6/13/2011 07:19:01 | 15.772 | 6/7/2011 19:19:01 | 23.672 |
| 6/13/2011 07:59:01 | 17.965 | 6/7/2011 19:59:01 | 23.672 |
| 6/13/2011 08:39:01 | 20.594 | 6/7/2011 20:39:01 | 23.734 |
| 6/13/2011 09:19:01 | 22.409 | 6/7/2011 21:19:01 | 23.734 |
| 6/13/2011 09:59:01 | 24.722 | 6/7/2011 21:59:01 | 23.734 |
| 6/13/2011 10:39:01 | 26.721 | 6/7/2011 22:39:01 | 23.797 |
| 6/13/2011 11:19:01 | 27.846 | 6/7/2011 23:19:01 | 23.797 |
| 6/13/2011 11:59:01 | 28.782 | 6/7/2011 23:59:01 | 23.797 |
| 6/13/2011 12:39:01 | 29.531 | 6/8/2011 00:39:01 | 23.797 |
| 6/13/2011 13:19:01 | 29.968 | 6/8/2011 01:19:01 | 23.797 |
| 6/13/2011 13:59:01 | 29.905 | 6/8/2011 01:59:01 | 23.797 |

|                    |        |                   |        |
|--------------------|--------|-------------------|--------|
| 6/13/2011 14:39:01 | 29.531 | 6/8/2011 02:39:01 | 23.797 |
| 6/13/2011 15:19:01 | 28.720 | 6/8/2011 03:19:01 | 23.734 |
| 6/13/2011 15:59:01 | 26.222 | 6/8/2011 03:59:01 | 23.734 |
| 6/13/2011 16:39:01 | 23.784 | 6/8/2011 04:39:01 | 23.734 |
| 6/13/2011 17:19:01 | 21.971 | 6/8/2011 05:19:01 | 23.734 |
| 6/13/2011 17:59:01 | 20.281 | 6/8/2011 05:59:01 | 23.672 |
| 6/13/2011 18:39:01 | 18.716 | 6/8/2011 06:39:01 | 23.672 |
| 6/13/2011 19:19:01 | 17.527 | 6/8/2011 07:19:01 | 23.609 |
| 6/13/2011 19:59:01 | 17.025 | 6/8/2011 07:59:01 | 23.609 |
| 6/13/2011 20:39:01 | 16.900 | 6/8/2011 08:39:01 | 23.609 |
| 6/13/2011 21:19:01 | 17.025 | 6/8/2011 09:19:01 | 23.547 |
| 6/13/2011 21:59:01 | 17.088 | 6/8/2011 09:59:01 | 23.547 |
| 6/13/2011 22:39:01 | 16.775 | 6/8/2011 10:39:01 | 23.484 |
| 6/13/2011 23:19:01 | 16.211 | 6/8/2011 11:19:01 | 23.484 |
| 6/13/2011 23:59:01 | 15.396 | 6/8/2011 11:59:01 | 23.484 |
| 6/14/2011 00:39:01 | 14.957 | 6/8/2011 12:39:01 | 23.484 |
| 6/14/2011 01:19:01 | 14.644 | 6/8/2011 13:19:01 | 23.421 |
| 6/14/2011 01:59:01 | 14.142 | 6/8/2011 13:59:01 | 23.484 |
| 6/14/2011 02:39:01 | 13.641 | 6/8/2011 14:39:01 | 23.484 |
| 6/14/2011 03:19:01 | 13.264 | 6/8/2011 15:19:01 | 23.484 |
| 6/14/2011 03:59:01 | 13.076 | 6/8/2011 15:59:01 | 23.484 |
| 6/14/2011 04:39:01 | 12.763 | 6/8/2011 16:39:01 | 23.484 |
| 6/14/2011 05:19:01 | 12.700 | 6/8/2011 17:19:01 | 23.547 |
| 6/14/2011 05:59:01 | 12.888 | 6/8/2011 17:59:01 | 23.547 |
| 6/14/2011 06:39:01 | 12.825 | 6/8/2011 18:39:01 | 23.547 |
| 6/14/2011 07:19:01 | 13.892 | 6/8/2011 19:19:01 | 23.609 |
| 6/14/2011 07:59:01 | 15.898 | 6/8/2011 19:59:01 | 23.609 |
| 6/14/2011 08:39:01 | 18.466 | 6/8/2011 20:39:01 | 23.609 |
| 6/14/2011 09:19:01 | 21.408 | 6/8/2011 21:19:01 | 23.609 |
| 6/14/2011 09:59:01 | 24.659 | 6/8/2011 21:59:01 | 23.609 |
| 6/14/2011 10:39:01 | 27.970 | 6/8/2011 22:39:01 | 23.609 |
| 6/14/2011 11:19:01 | 29.032 | 6/8/2011 23:19:01 | 23.609 |
| 6/14/2011 11:59:01 | 29.718 | 6/8/2011 23:59:01 | 23.609 |
| 6/14/2011 12:39:01 | 29.656 | 6/9/2011 00:39:01 | 23.609 |
| 6/14/2011 13:19:01 | 30.342 | 6/9/2011 01:19:01 | 23.609 |
| 6/14/2011 13:59:01 | 30.155 | 6/9/2011 01:59:01 | 23.547 |
| 6/14/2011 14:39:01 | 29.593 | 6/9/2011 02:39:01 | 23.547 |
| 6/14/2011 15:19:01 | 27.096 | 6/9/2011 03:19:01 | 23.547 |
| 6/14/2011 15:59:01 | 25.159 | 6/9/2011 03:59:01 | 23.547 |
| 6/14/2011 16:39:01 | 23.409 | 6/9/2011 04:39:01 | 23.484 |
| 6/14/2011 17:19:01 | 22.158 | 6/9/2011 05:19:01 | 23.484 |
| 6/14/2011 17:59:01 | 20.344 | 6/9/2011 05:59:01 | 23.421 |
| 6/14/2011 18:39:01 | 18.716 | 6/9/2011 06:39:01 | 23.421 |
| 6/14/2011 19:19:01 | 17.339 | 6/9/2011 07:19:01 | 23.421 |
| 6/14/2011 19:59:01 | 16.462 | 6/9/2011 07:59:01 | 23.359 |
| 6/14/2011 20:39:01 | 16.274 | 6/9/2011 08:39:01 | 23.359 |
| 6/14/2011 21:19:01 | 16.274 | 6/9/2011 09:19:01 | 23.296 |
| 6/14/2011 21:59:01 | 16.148 | 6/9/2011 09:59:01 | 23.296 |
| 6/14/2011 22:39:01 | 15.710 | 6/9/2011 10:39:01 | 23.296 |
| 6/14/2011 23:19:01 | 15.459 | 6/9/2011 11:19:01 | 23.234 |

|                    |        |                    |        |
|--------------------|--------|--------------------|--------|
| 6/14/2011 23:59:01 | 15.647 | 6/9/2011 11:59:01  | 23.234 |
| 6/15/2011 00:39:01 | 16.399 | 6/9/2011 12:39:01  | 23.234 |
| 6/15/2011 01:19:01 | 16.086 | 6/9/2011 13:19:01  | 23.234 |
| 6/15/2011 01:59:01 | 15.772 | 6/9/2011 13:59:01  | 23.234 |
| 6/15/2011 02:39:01 | 16.274 | 6/9/2011 14:39:01  | 23.296 |
| 6/15/2011 03:19:01 | 16.712 | 6/9/2011 15:19:01  | 23.296 |
| 6/15/2011 03:59:01 | 16.963 | 6/9/2011 15:59:01  | 23.359 |
| 6/15/2011 04:39:01 | 16.963 | 6/9/2011 16:39:01  | 23.359 |
| 6/15/2011 05:19:01 | 17.088 | 6/9/2011 17:19:01  | 23.359 |
| 6/15/2011 05:59:01 | 17.464 | 6/9/2011 17:59:01  | 23.421 |
| 6/15/2011 06:39:01 | 17.339 | 6/9/2011 18:39:01  | 23.421 |
| 6/15/2011 07:19:01 | 17.401 | 6/9/2011 19:19:01  | 23.484 |
| 6/15/2011 07:59:01 | 18.403 | 6/9/2011 19:59:01  | 23.484 |
| 6/15/2011 08:39:01 | 21.220 | 6/9/2011 20:39:01  | 23.484 |
| 6/15/2011 09:19:01 | 23.847 | 6/9/2011 21:19:01  | 23.547 |
| 6/15/2011 09:59:01 | 25.847 | 6/9/2011 21:59:01  | 23.547 |
| 6/15/2011 10:39:01 | 27.908 | 6/9/2011 22:39:01  | 23.547 |
| 6/15/2011 11:19:01 | 29.157 | 6/9/2011 23:19:01  | 23.547 |
| 6/15/2011 11:59:01 | 29.781 | 6/9/2011 23:59:01  | 23.547 |
| 6/15/2011 12:39:01 | 29.781 | 6/10/2011 00:39:01 | 23.547 |
| 6/15/2011 13:19:01 | 30.405 | 6/10/2011 01:19:01 | 23.547 |
| 6/15/2011 13:59:01 | 29.843 | 6/10/2011 01:59:01 | 23.547 |
| 6/15/2011 14:39:01 | 28.657 | 6/10/2011 02:39:01 | 23.547 |
| 6/15/2011 15:19:01 | 27.596 | 6/10/2011 03:19:01 | 23.484 |
| 6/15/2011 15:59:01 | 26.846 | 6/10/2011 03:59:01 | 23.484 |
| 6/15/2011 16:39:01 | 26.034 | 6/10/2011 04:39:01 | 23.484 |
| 6/15/2011 17:19:01 | 24.597 | 6/10/2011 05:19:01 | 23.421 |
| 6/15/2011 17:59:01 | 23.284 | 6/10/2011 05:59:01 | 23.421 |
| 6/15/2011 18:39:01 | 22.409 | 6/10/2011 06:39:01 | 23.359 |
| 6/15/2011 19:19:01 | 21.971 | 6/10/2011 07:19:01 | 23.359 |
| 6/15/2011 19:59:01 | 21.032 | 6/10/2011 07:59:01 | 23.296 |
| 6/15/2011 20:39:01 | 21.095 | 6/10/2011 08:39:01 | 23.296 |
| 6/15/2011 21:19:01 | 21.533 | 6/10/2011 09:19:01 | 23.234 |
| 6/15/2011 21:59:01 | 21.345 | 6/10/2011 09:59:01 | 23.171 |
| 6/15/2011 22:39:01 | 21.157 | 6/10/2011 10:39:01 | 23.171 |
| 6/15/2011 23:19:01 | 20.469 | 6/10/2011 11:19:01 | 23.171 |
| 6/15/2011 23:59:01 | 19.593 | 6/10/2011 11:59:01 | 23.109 |
| 6/16/2011 00:39:01 | 19.343 | 6/10/2011 12:39:01 | 23.109 |
| 6/16/2011 01:19:01 | 18.654 | 6/10/2011 13:19:01 | 23.109 |
| 6/16/2011 01:59:01 | 18.278 | 6/10/2011 13:59:01 | 23.109 |
| 6/16/2011 02:39:01 | 17.840 | 6/10/2011 14:39:01 | 23.171 |
| 6/16/2011 03:19:01 | 17.464 | 6/10/2011 15:19:01 | 23.171 |
| 6/16/2011 03:59:01 | 17.088 | 6/10/2011 15:59:01 | 23.234 |
| 6/16/2011 04:39:01 | 16.712 | 6/10/2011 16:39:01 | 23.234 |
| 6/16/2011 05:19:01 | 16.649 | 6/10/2011 17:19:01 | 23.296 |
| 6/16/2011 05:59:01 | 16.399 | 6/10/2011 17:59:01 | 23.296 |
| 6/16/2011 06:39:01 | 16.462 | 6/10/2011 18:39:01 | 23.359 |
| 6/16/2011 07:19:01 | 17.902 | 6/10/2011 19:19:01 | 23.359 |
| 6/16/2011 07:59:01 | 19.405 | 6/10/2011 19:59:01 | 23.359 |
| 6/16/2011 08:39:01 | 21.533 | 6/10/2011 20:39:01 | 23.421 |

|                    |        |                    |        |
|--------------------|--------|--------------------|--------|
| 6/16/2011 09:19:01 | 24.534 | 6/10/2011 21:19:01 | 23.421 |
| 6/16/2011 09:59:01 | 26.596 | 6/10/2011 21:59:01 | 23.421 |
| 6/16/2011 10:39:01 | 28.657 | 6/10/2011 22:39:01 | 23.421 |
| 6/16/2011 11:19:01 | 29.281 | 6/10/2011 23:19:01 | 23.421 |
| 6/16/2011 11:59:01 | 29.905 | 6/10/2011 23:59:01 | 23.421 |
| 6/16/2011 12:39:01 | 30.280 | 6/11/2011 00:39:01 | 23.421 |
| 6/16/2011 13:19:01 | 30.342 | 6/11/2011 01:19:01 | 23.421 |
| 6/16/2011 13:59:01 | 29.843 | 6/11/2011 01:59:01 | 23.421 |
| 6/16/2011 14:39:01 | 29.531 | 6/11/2011 02:39:01 | 23.421 |
| 6/16/2011 15:19:01 | 28.720 | 6/11/2011 03:19:01 | 23.421 |
| 6/16/2011 15:59:01 | 26.347 | 6/11/2011 03:59:01 | 23.421 |
| 6/16/2011 16:39:01 | 24.847 | 6/11/2011 04:39:01 | 23.359 |
| 6/16/2011 17:19:01 | 23.534 | 6/11/2011 05:19:01 | 23.359 |
| 6/16/2011 17:59:01 | 22.346 | 6/11/2011 05:59:01 | 23.359 |
| 6/16/2011 18:39:01 | 21.095 | 6/11/2011 06:39:01 | 23.359 |
| 6/16/2011 19:19:01 | 19.968 | 6/11/2011 07:19:01 | 23.296 |
| 6/16/2011 19:59:01 | 19.217 | 6/11/2011 07:59:01 | 23.296 |
| 6/16/2011 20:39:01 | 18.779 | 6/11/2011 08:39:01 | 23.296 |
| 6/16/2011 21:19:01 | 18.215 | 6/11/2011 09:19:01 | 23.234 |
| 6/16/2011 21:59:01 | 17.777 | 6/11/2011 09:59:01 | 23.234 |
| 6/16/2011 22:39:01 | 17.464 | 6/11/2011 10:39:01 | 23.234 |
| 6/16/2011 23:19:01 | 17.213 | 6/11/2011 11:19:01 | 23.171 |
| 6/16/2011 23:59:01 | 16.963 | 6/11/2011 11:59:01 | 23.171 |
| 6/17/2011 00:39:01 | 16.712 | 6/11/2011 12:39:01 | 23.171 |
| 6/17/2011 01:19:01 | 16.399 | 6/11/2011 13:19:01 | 23.171 |
| 6/17/2011 01:59:01 | 16.023 | 6/11/2011 13:59:01 | 23.171 |
| 6/17/2011 02:39:01 | 15.772 | 6/11/2011 14:39:01 | 23.234 |
| 6/17/2011 03:19:01 | 15.710 | 6/11/2011 15:19:01 | 23.234 |
| 6/17/2011 03:59:01 | 15.710 | 6/11/2011 15:59:01 | 23.296 |
| 6/17/2011 04:39:01 | 15.584 | 6/11/2011 16:39:01 | 23.296 |
| 6/17/2011 05:19:01 | 15.208 | 6/11/2011 17:19:01 | 23.359 |
| 6/17/2011 05:59:01 | 15.208 | 6/11/2011 17:59:01 | 23.359 |
| 6/17/2011 06:39:01 | 15.145 | 6/11/2011 18:39:01 | 23.359 |
| 6/17/2011 07:19:01 | 15.835 | 6/11/2011 19:19:01 | 23.421 |
| 6/17/2011 07:59:01 | 17.840 | 6/11/2011 19:59:01 | 23.421 |
| 6/17/2011 08:39:01 | 20.532 | 6/11/2011 20:39:01 | 23.484 |
| 6/17/2011 09:19:01 | 23.784 | 6/11/2011 21:19:01 | 23.484 |
| 6/17/2011 09:59:01 | 25.159 | 6/11/2011 21:59:01 | 23.484 |
| 6/17/2011 10:39:01 | 28.095 | 6/11/2011 22:39:01 | 23.484 |
| 6/17/2011 11:19:01 | 28.844 | 6/11/2011 23:19:01 | 23.484 |
| 6/17/2011 11:59:01 | 28.782 | 6/11/2011 23:59:01 | 23.484 |
| 6/17/2011 12:39:01 | 29.593 | 6/12/2011 00:39:01 | 23.484 |
| 6/17/2011 13:19:01 | 29.094 | 6/12/2011 01:19:01 | 23.547 |
| 6/17/2011 13:59:01 | 30.217 | 6/12/2011 01:59:01 | 23.547 |
| 6/17/2011 14:39:01 | 29.718 | 6/12/2011 02:39:01 | 23.484 |
| 6/17/2011 15:19:01 | 29.157 | 6/12/2011 03:19:01 | 23.484 |
| 6/17/2011 15:59:01 | 27.221 | 6/12/2011 03:59:01 | 23.484 |
| 6/17/2011 16:39:01 | 25.222 | 6/12/2011 04:39:01 | 23.484 |
| 6/17/2011 17:19:01 | 23.722 | 6/12/2011 05:19:01 | 23.484 |
| 6/17/2011 17:59:01 | 21.971 | 6/12/2011 05:59:01 | 23.484 |



|                    |        |                    |        |
|--------------------|--------|--------------------|--------|
| 6/17/2011 18:39:01 | 20.594 | 6/12/2011 06:39:01 | 23.484 |
| 6/17/2011 19:19:01 | 19.656 | 6/12/2011 07:19:01 | 23.484 |
| 6/17/2011 19:59:01 | 18.779 | 6/12/2011 07:59:01 | 23.484 |
| 6/17/2011 20:39:01 | 18.153 | 6/12/2011 08:39:01 | 23.421 |
| 6/17/2011 21:19:01 | 17.965 | 6/12/2011 09:19:01 | 23.421 |
| 6/17/2011 21:59:01 | 17.589 | 6/12/2011 09:59:01 | 23.421 |
| 6/17/2011 22:39:01 | 17.464 | 6/12/2011 10:39:01 | 23.421 |
| 6/17/2011 23:19:01 | 17.527 | 6/12/2011 11:19:01 | 23.421 |
| 6/17/2011 23:59:01 | 17.464 | 6/12/2011 11:59:01 | 23.421 |
| 6/18/2011 00:39:01 | 17.213 | 6/12/2011 12:39:01 | 23.359 |
| 6/18/2011 01:19:01 | 16.963 | 6/12/2011 13:19:01 | 23.421 |
| 6/18/2011 01:59:01 | 16.712 | 6/12/2011 13:59:01 | 23.421 |
| 6/18/2011 02:39:01 | 16.649 | 6/12/2011 14:39:01 | 23.421 |
| 6/18/2011 03:19:01 | 16.524 | 6/12/2011 15:19:01 | 23.421 |
| 6/18/2011 03:59:01 | 16.399 | 6/12/2011 15:59:01 | 23.484 |
| 6/18/2011 04:39:01 | 16.211 | 6/12/2011 16:39:01 | 23.484 |
| 6/18/2011 05:19:01 | 16.086 | 6/12/2011 17:19:01 | 23.484 |
| 6/18/2011 05:59:01 | 16.086 | 6/12/2011 17:59:01 | 23.547 |
| 6/18/2011 06:39:01 | 16.274 | 6/12/2011 18:39:01 | 23.547 |
| 6/18/2011 07:19:01 | 16.712 | 6/12/2011 19:19:01 | 23.609 |
| 6/18/2011 07:59:01 | 18.529 | 6/12/2011 19:59:01 | 23.609 |
| 6/18/2011 08:39:01 | 21.220 | 6/12/2011 20:39:01 | 23.609 |
| 6/18/2011 09:19:01 | 24.097 | 6/12/2011 21:19:01 | 23.609 |
| 6/18/2011 09:59:01 | 26.971 | 6/12/2011 21:59:01 | 23.609 |
| 6/18/2011 10:39:01 | 29.531 | 6/12/2011 22:39:01 | 23.609 |
| 6/18/2011 11:19:01 | 30.467 | 6/12/2011 23:19:01 | 23.609 |
| 6/18/2011 11:59:01 | 30.841 | 6/12/2011 23:59:01 | 23.609 |
| 6/18/2011 12:39:01 | 31.216 | 6/13/2011 00:39:01 | 23.609 |
| 6/18/2011 13:19:01 | 31.216 | 6/13/2011 01:19:01 | 23.609 |
| 6/18/2011 13:59:01 | 31.403 | 6/13/2011 01:59:01 | 23.547 |
| 6/18/2011 14:39:01 | 31.153 | 6/13/2011 02:39:01 | 23.547 |
| 6/18/2011 15:19:01 | 29.968 | 6/13/2011 03:19:01 | 23.547 |
| 6/18/2011 15:59:01 | 27.846 | 6/13/2011 03:59:01 | 23.484 |
| 6/18/2011 16:39:01 | 25.972 | 6/13/2011 04:39:01 | 23.484 |
| 6/18/2011 17:19:01 | 24.409 | 6/13/2011 05:19:01 | 23.484 |
| 6/18/2011 17:59:01 | 22.971 | 6/13/2011 05:59:01 | 23.421 |
| 6/18/2011 18:39:01 | 21.595 | 6/13/2011 06:39:01 | 23.421 |
| 6/18/2011 19:19:01 | 20.532 | 6/13/2011 07:19:01 | 23.359 |
| 6/18/2011 19:59:01 | 20.094 | 6/13/2011 07:59:01 | 23.359 |
| 6/18/2011 20:39:01 | 20.594 | 6/13/2011 08:39:01 | 23.296 |
| 6/18/2011 21:19:01 | 20.719 | 6/13/2011 09:19:01 | 23.296 |
| 6/18/2011 21:59:01 | 20.719 | 6/13/2011 09:59:01 | 23.234 |
| 6/18/2011 22:39:01 | 20.594 | 6/13/2011 10:39:01 | 23.234 |
| 6/18/2011 23:19:01 | 20.657 | 6/13/2011 11:19:01 | 23.171 |
| 6/18/2011 23:59:01 | 19.968 | 6/13/2011 11:59:01 | 23.171 |
| 6/19/2011 00:39:01 | 19.468 | 6/13/2011 12:39:01 | 23.171 |
| 6/19/2011 01:19:01 | 19.092 | 6/13/2011 13:19:01 | 23.171 |
| 6/19/2011 01:59:01 | 18.654 | 6/13/2011 13:59:01 | 23.171 |
| 6/19/2011 02:39:01 | 18.090 | 6/13/2011 14:39:01 | 23.171 |
| 6/19/2011 03:19:01 | 18.090 | 6/13/2011 15:19:01 | 23.171 |

|                    |        |                    |        |
|--------------------|--------|--------------------|--------|
| 6/19/2011 03:59:01 | 17.714 | 6/13/2011 15:59:01 | 23.234 |
| 6/19/2011 04:39:01 | 17.527 | 6/13/2011 16:39:01 | 23.234 |
| 6/19/2011 05:19:01 | 17.464 | 6/13/2011 17:19:01 | 23.234 |
| 6/19/2011 05:59:01 | 17.464 | 6/13/2011 17:59:01 | 23.296 |
| 6/19/2011 06:39:01 | 17.714 | 6/13/2011 18:39:01 | 23.296 |
| 6/19/2011 07:19:01 | 18.654 | 6/13/2011 19:19:01 | 23.296 |
| 6/19/2011 07:59:01 | 20.156 | 6/13/2011 19:59:01 | 23.359 |
| 6/19/2011 08:39:01 | 21.721 | 6/13/2011 20:39:01 | 23.359 |
| 6/19/2011 09:19:01 | 23.034 | 6/13/2011 21:19:01 | 23.359 |
| 6/19/2011 09:59:01 | 26.034 | 6/13/2011 21:59:01 | 23.359 |
| 6/19/2011 10:39:01 | 27.783 | 6/13/2011 22:39:01 | 23.359 |
| 6/19/2011 11:19:01 | 29.781 | 6/13/2011 23:19:01 | 23.359 |
| 6/19/2011 11:59:01 | 30.779 | 6/13/2011 23:59:01 | 23.296 |
| 6/19/2011 12:39:01 | 31.403 | 6/14/2011 00:39:01 | 23.296 |
| 6/19/2011 13:19:01 | 31.652 | 6/14/2011 01:19:01 | 23.296 |
| 6/19/2011 13:59:01 | 31.902 | 6/14/2011 01:59:01 | 23.296 |
| 6/19/2011 14:39:01 | 31.527 | 6/14/2011 02:39:01 | 23.234 |
| 6/19/2011 15:19:01 | 30.467 | 6/14/2011 03:19:01 | 23.234 |
| 6/19/2011 15:59:01 | 28.158 | 6/14/2011 03:59:01 | 23.234 |
| 6/19/2011 16:39:01 | 26.222 | 6/14/2011 04:39:01 | 23.171 |
| 6/19/2011 17:19:01 | 24.722 | 6/14/2011 05:19:01 | 23.171 |
| 6/19/2011 17:59:01 | 22.659 | 6/14/2011 05:59:01 | 23.109 |
| 6/19/2011 18:39:01 | 21.721 | 6/14/2011 06:39:01 | 23.109 |
| 6/19/2011 19:19:01 | 20.719 | 6/14/2011 07:19:01 | 23.046 |
| 6/19/2011 19:59:01 | 20.407 | 6/14/2011 07:59:01 | 22.984 |
| 6/19/2011 20:39:01 | 20.845 | 6/14/2011 08:39:01 | 22.984 |
| 6/19/2011 21:19:01 | 21.220 | 6/14/2011 09:19:01 | 22.921 |
| 6/19/2011 21:59:01 | 21.283 | 6/14/2011 09:59:01 | 22.921 |
| 6/19/2011 22:39:01 | 20.845 | 6/14/2011 10:39:01 | 22.859 |
| 6/19/2011 23:19:01 | 20.657 | 6/14/2011 11:19:01 | 22.859 |
| 6/19/2011 23:59:01 | 21.032 | 6/14/2011 11:59:01 | 22.796 |
| 6/20/2011 00:39:01 | 21.157 | 6/14/2011 12:39:01 | 22.796 |
| 6/20/2011 01:19:01 | 21.283 | 6/14/2011 13:19:01 | 22.796 |
| 6/20/2011 01:59:01 | 22.033 | 6/14/2011 13:59:01 | 22.796 |
| 6/20/2011 02:39:01 | 22.346 | 6/14/2011 14:39:01 | 22.796 |
| 6/20/2011 03:19:01 | 22.534 | 6/14/2011 15:19:01 | 22.859 |
| 6/20/2011 03:59:01 | 22.659 | 6/14/2011 15:59:01 | 22.859 |
| 6/20/2011 04:39:01 | 22.596 | 6/14/2011 16:39:01 | 22.921 |
| 6/20/2011 05:19:01 | 22.221 | 6/14/2011 17:19:01 | 22.921 |
| 6/20/2011 05:59:01 | 21.783 | 6/14/2011 17:59:01 | 22.921 |
| 6/20/2011 06:39:01 | 21.971 | 6/14/2011 18:39:01 | 22.984 |
| 6/20/2011 07:19:01 | 22.158 | 6/14/2011 19:19:01 | 22.984 |
| 6/20/2011 07:59:01 | 23.097 | 6/14/2011 19:59:01 | 22.984 |
| 6/20/2011 08:39:01 | 23.659 | 6/14/2011 20:39:01 | 23.046 |
| 6/20/2011 09:19:01 | 24.972 | 6/14/2011 21:19:01 | 23.046 |
| 6/20/2011 09:59:01 | 26.784 | 6/14/2011 21:59:01 | 23.046 |
| 6/20/2011 10:39:01 | 28.595 | 6/14/2011 22:39:01 | 23.046 |
| 6/20/2011 11:19:01 | 29.905 | 6/14/2011 23:19:01 | 23.046 |
| 6/20/2011 11:59:01 | 30.405 | 6/14/2011 23:59:01 | 23.046 |
| 6/20/2011 12:39:01 | 30.966 | 6/15/2011 00:39:01 | 23.046 |

|                    |        |                    |        |
|--------------------|--------|--------------------|--------|
| 6/20/2011 13:19:01 | 31.278 | 6/15/2011 01:19:01 | 22.984 |
| 6/20/2011 13:59:01 | 31.403 | 6/15/2011 01:59:01 | 22.984 |
| 6/20/2011 14:39:01 | 31.278 | 6/15/2011 02:39:01 | 22.984 |
| 6/20/2011 15:19:01 | 30.717 | 6/15/2011 03:19:01 | 22.984 |
| 6/20/2011 15:59:01 | 29.094 | 6/15/2011 03:59:01 | 22.921 |
| 6/20/2011 16:39:01 | 27.783 | 6/15/2011 04:39:01 | 22.921 |
| 6/20/2011 17:19:01 | 26.034 | 6/15/2011 05:19:01 | 22.921 |
| 6/20/2011 17:59:01 | 24.034 | 6/15/2011 05:59:01 | 22.859 |
| 6/20/2011 18:39:01 | 22.659 | 6/15/2011 06:39:01 | 22.859 |
| 6/20/2011 19:19:01 | 21.971 | 6/15/2011 07:19:01 | 22.859 |
| 6/20/2011 19:59:01 | 21.470 | 6/15/2011 07:59:01 | 22.859 |
| 6/20/2011 20:39:01 | 21.533 | 6/15/2011 08:39:01 | 22.796 |
| 6/20/2011 21:19:01 | 21.408 | 6/15/2011 09:19:01 | 22.796 |
| 6/20/2011 21:59:01 | 21.470 | 6/15/2011 09:59:01 | 22.796 |
| 6/20/2011 22:39:01 | 20.469 | 6/15/2011 10:39:01 | 22.796 |
| 6/20/2011 23:19:01 | 20.344 | 6/15/2011 11:19:01 | 22.796 |
| 6/20/2011 23:59:01 | 20.281 | 6/15/2011 11:59:01 | 22.796 |
| 6/21/2011 00:39:01 | 20.407 | 6/15/2011 12:39:01 | 22.796 |
| 6/21/2011 01:19:01 | 20.219 | 6/15/2011 13:19:01 | 22.796 |
| 6/21/2011 01:59:01 | 19.718 | 6/15/2011 13:59:01 | 22.796 |
| 6/21/2011 02:39:01 | 19.217 | 6/15/2011 14:39:01 | 22.796 |
| 6/21/2011 03:19:01 | 18.654 | 6/15/2011 15:19:01 | 22.859 |
| 6/21/2011 03:59:01 | 18.215 | 6/15/2011 15:59:01 | 22.859 |
| 6/21/2011 04:39:01 | 18.215 | 6/15/2011 16:39:01 | 22.921 |
| 6/21/2011 05:19:01 | 18.779 | 6/15/2011 17:19:01 | 22.921 |
| 6/21/2011 05:59:01 | 19.092 | 6/15/2011 17:59:01 | 22.921 |
| 6/21/2011 06:39:01 | 18.654 | 6/15/2011 18:39:01 | 22.984 |
| 6/21/2011 07:19:01 | 19.092 | 6/15/2011 19:19:01 | 22.984 |
| 6/21/2011 07:59:01 | 20.970 | 6/15/2011 19:59:01 | 23.046 |
| 6/21/2011 08:39:01 | 22.096 | 6/15/2011 20:39:01 | 23.109 |
| 6/21/2011 09:19:01 | 24.472 | 6/15/2011 21:19:01 | 23.109 |
| 6/21/2011 09:59:01 | 25.784 | 6/15/2011 21:59:01 | 23.109 |
| 6/21/2011 10:39:01 | 25.597 | 6/15/2011 22:39:01 | 23.109 |
| 6/21/2011 11:19:01 | 29.157 | 6/15/2011 23:19:01 | 23.171 |
| 6/21/2011 11:59:01 | 29.718 | 6/15/2011 23:59:01 | 23.171 |
| 6/21/2011 12:39:01 | 30.405 | 6/16/2011 00:39:01 | 23.171 |
| 6/21/2011 13:19:01 | 30.592 | 6/16/2011 01:19:01 | 23.171 |
| 6/21/2011 13:59:01 | 30.280 | 6/16/2011 01:59:01 | 23.171 |
| 6/21/2011 14:39:01 | 30.342 | 6/16/2011 02:39:01 | 23.171 |
| 6/21/2011 15:19:01 | 29.718 | 6/16/2011 03:19:01 | 23.171 |
| 6/21/2011 15:59:01 | 27.908 | 6/16/2011 03:59:01 | 23.171 |
| 6/21/2011 16:39:01 | 25.659 | 6/16/2011 04:39:01 | 23.171 |
| 6/21/2011 17:19:01 | 23.972 | 6/16/2011 05:19:01 | 23.171 |
| 6/21/2011 17:59:01 | 22.534 | 6/16/2011 05:59:01 | 23.171 |
| 6/21/2011 18:39:01 | 20.845 | 6/16/2011 06:39:01 | 23.171 |
| 6/21/2011 19:19:01 | 19.656 | 6/16/2011 07:19:01 | 23.109 |
| 6/21/2011 19:59:01 | 18.716 | 6/16/2011 07:59:01 | 23.109 |
| 6/21/2011 20:39:01 | 18.028 | 6/16/2011 08:39:01 | 23.109 |
| 6/21/2011 21:19:01 | 17.527 | 6/16/2011 09:19:01 | 23.109 |
| 6/21/2011 21:59:01 | 17.464 | 6/16/2011 09:59:01 | 23.109 |

|                    |        |                    |        |
|--------------------|--------|--------------------|--------|
| 6/21/2011 22:39:01 | 17.401 | 6/16/2011 10:39:01 | 23.046 |
| 6/21/2011 23:19:01 | 17.840 | 6/16/2011 11:19:01 | 23.046 |
| 6/21/2011 23:59:01 | 18.529 | 6/16/2011 11:59:01 | 23.046 |
| 6/22/2011 00:39:01 | 18.466 | 6/16/2011 12:39:01 | 23.046 |
| 6/22/2011 01:19:01 | 18.028 | 6/16/2011 13:19:01 | 23.046 |
| 6/22/2011 01:59:01 | 18.215 | 6/16/2011 13:59:01 | 23.046 |
| 6/22/2011 02:39:01 | 18.529 | 6/16/2011 14:39:01 | 23.109 |
| 6/22/2011 03:19:01 | 18.403 | 6/16/2011 15:19:01 | 23.109 |
| 6/22/2011 03:59:01 | 17.902 | 6/16/2011 15:59:01 | 23.109 |
| 6/22/2011 04:39:01 | 17.088 | 6/16/2011 16:39:01 | 23.171 |
| 6/22/2011 05:19:01 | 16.399 | 6/16/2011 17:19:01 | 23.171 |
| 6/22/2011 05:59:01 | 15.960 | 6/16/2011 17:59:01 | 23.234 |
| 6/22/2011 06:39:01 | 15.710 | 6/16/2011 18:39:01 | 23.234 |
| 6/22/2011 07:19:01 | 16.086 | 6/16/2011 19:19:01 | 23.234 |
| 6/22/2011 07:59:01 | 18.090 | 6/16/2011 19:59:01 | 23.296 |
| 6/22/2011 08:39:01 | 20.970 | 6/16/2011 20:39:01 | 23.296 |
| 6/22/2011 09:19:01 | 23.534 | 6/16/2011 21:19:01 | 23.296 |
| 6/22/2011 09:59:01 | 26.347 | 6/16/2011 21:59:01 | 23.296 |
| 6/22/2011 10:39:01 | 28.720 | 6/16/2011 22:39:01 | 23.359 |
| 6/22/2011 11:19:01 | 29.406 | 6/16/2011 23:19:01 | 23.359 |
| 6/22/2011 11:59:01 | 29.781 | 6/16/2011 23:59:01 | 23.359 |
| 6/22/2011 12:39:01 | 29.843 | 6/17/2011 00:39:01 | 23.296 |
| 6/22/2011 13:19:01 | 30.280 | 6/17/2011 01:19:01 | 23.296 |
| 6/22/2011 13:59:01 | 30.592 | 6/17/2011 01:59:01 | 23.296 |
| 6/22/2011 14:39:01 | 30.342 | 6/17/2011 02:39:01 | 23.296 |
| 6/22/2011 15:19:01 | 28.969 | 6/17/2011 03:19:01 | 23.296 |
| 6/22/2011 15:59:01 | 27.096 | 6/17/2011 03:59:01 | 23.234 |
| 6/22/2011 16:39:01 | 25.409 | 6/17/2011 04:39:01 | 23.234 |
| 6/22/2011 17:19:01 | 23.847 | 6/17/2011 05:19:01 | 23.234 |
| 6/22/2011 17:59:01 | 22.033 | 6/17/2011 05:59:01 | 23.171 |
| 6/22/2011 18:39:01 | 20.594 | 6/17/2011 06:39:01 | 23.171 |
| 6/22/2011 19:19:01 | 19.656 | 6/17/2011 07:19:01 | 23.171 |
| 6/22/2011 19:59:01 | 18.904 | 6/17/2011 07:59:01 | 23.109 |
| 6/22/2011 20:39:01 | 18.529 | 6/17/2011 08:39:01 | 23.109 |
| 6/22/2011 21:19:01 | 18.466 | 6/17/2011 09:19:01 | 23.046 |
| 6/22/2011 21:59:01 | 18.278 | 6/17/2011 09:59:01 | 23.046 |
| 6/22/2011 22:39:01 | 18.090 | 6/17/2011 10:39:01 | 23.046 |
| 6/22/2011 23:19:01 | 18.028 | 6/17/2011 11:19:01 | 23.046 |
| 6/22/2011 23:59:01 | 17.902 | 6/17/2011 11:59:01 | 22.984 |
| 6/23/2011 00:39:01 | 17.965 | 6/17/2011 12:39:01 | 22.984 |
| 6/23/2011 01:19:01 | 18.153 | 6/17/2011 13:19:01 | 22.984 |
| 6/23/2011 01:59:01 | 17.902 | 6/17/2011 13:59:01 | 22.984 |
| 6/23/2011 02:39:01 | 17.652 | 6/17/2011 14:39:01 | 23.046 |
| 6/23/2011 03:19:01 | 17.339 | 6/17/2011 15:19:01 | 23.046 |
| 6/23/2011 03:59:01 | 16.900 | 6/17/2011 15:59:01 | 23.046 |
| 6/23/2011 04:39:01 | 16.712 | 6/17/2011 16:39:01 | 23.109 |
| 6/23/2011 05:19:01 | 16.587 | 6/17/2011 17:19:01 | 23.109 |
| 6/23/2011 05:59:01 | 16.336 | 6/17/2011 17:59:01 | 23.171 |
| 6/23/2011 06:39:01 | 16.148 | 6/17/2011 18:39:01 | 23.171 |
| 6/23/2011 07:19:01 | 16.900 | 6/17/2011 19:19:01 | 23.171 |

|                    |        |                    |        |
|--------------------|--------|--------------------|--------|
| 6/23/2011 07:59:01 | 18.904 | 6/17/2011 19:59:01 | 23.234 |
| 6/23/2011 08:39:01 | 21.533 | 6/17/2011 20:39:01 | 23.234 |
| 6/23/2011 09:19:01 | 23.909 | 6/17/2011 21:19:01 | 23.234 |
| 6/23/2011 09:59:01 | 26.222 | 6/17/2011 21:59:01 | 23.296 |
| 6/23/2011 10:39:01 | 28.595 | 6/17/2011 22:39:01 | 23.296 |
| 6/23/2011 11:19:01 | 29.219 | 6/17/2011 23:19:01 | 23.296 |
| 6/23/2011 11:59:01 | 29.593 | 6/17/2011 23:59:01 | 23.296 |
| 6/23/2011 12:39:01 | 30.342 | 6/18/2011 00:39:01 | 23.234 |
| 6/23/2011 13:19:01 | 27.658 | 6/18/2011 01:19:01 | 23.234 |
| 6/23/2011 13:59:01 | 29.968 | 6/18/2011 01:59:01 | 23.234 |
| 6/23/2011 14:39:01 | 28.283 | 6/18/2011 02:39:01 | 23.234 |
| 6/23/2011 15:19:01 | 28.907 | 6/18/2011 03:19:01 | 23.234 |
| 6/23/2011 15:59:01 | 27.471 | 6/18/2011 03:59:01 | 23.171 |
| 6/23/2011 16:39:01 | 25.222 | 6/18/2011 04:39:01 | 23.171 |
| 6/23/2011 17:19:01 | 23.409 | 6/18/2011 05:19:01 | 23.171 |
| 6/23/2011 17:59:01 | 21.971 | 6/18/2011 05:59:01 | 23.109 |
| 6/23/2011 18:39:01 | 20.594 | 6/18/2011 06:39:01 | 23.109 |
| 6/23/2011 19:19:01 | 19.468 | 6/18/2011 07:19:01 | 23.109 |
| 6/23/2011 19:59:01 | 19.092 | 6/18/2011 07:59:01 | 23.046 |
| 6/23/2011 20:39:01 | 19.405 | 6/18/2011 08:39:01 | 23.046 |
| 6/23/2011 21:19:01 | 18.904 | 6/18/2011 09:19:01 | 23.046 |
| 6/23/2011 21:59:01 | 18.278 | 6/18/2011 09:59:01 | 22.984 |
| 6/23/2011 22:39:01 | 18.215 | 6/18/2011 10:39:01 | 22.984 |
| 6/23/2011 23:19:01 | 17.965 | 6/18/2011 11:19:01 | 22.984 |
| 6/23/2011 23:59:01 | 17.527 | 6/18/2011 11:59:01 | 22.984 |
| 6/24/2011 00:39:01 | 17.088 | 6/18/2011 12:39:01 | 22.984 |
| 6/24/2011 01:19:01 | 16.399 | 6/18/2011 13:19:01 | 22.984 |
| 6/24/2011 01:59:01 | 15.835 | 6/18/2011 13:59:01 | 22.984 |
| 6/24/2011 02:39:01 | 15.522 | 6/18/2011 14:39:01 | 23.046 |
| 6/24/2011 03:19:01 | 15.145 | 6/18/2011 15:19:01 | 23.046 |
| 6/24/2011 03:59:01 | 14.832 | 6/18/2011 15:59:01 | 23.109 |
| 6/24/2011 04:39:01 | 14.707 | 6/18/2011 16:39:01 | 23.109 |
| 6/24/2011 05:19:01 | 14.519 | 6/18/2011 17:19:01 | 23.171 |
| 6/24/2011 05:59:01 | 14.393 | 6/18/2011 17:59:01 | 23.171 |
| 6/24/2011 06:39:01 | 14.330 | 6/18/2011 18:39:01 | 23.234 |
| 6/24/2011 07:19:01 | 15.145 | 6/18/2011 19:19:01 | 23.234 |
| 6/24/2011 07:59:01 | 17.401 | 6/18/2011 19:59:01 | 23.296 |
| 6/24/2011 08:39:01 | 19.593 | 6/18/2011 20:39:01 | 23.296 |
| 6/24/2011 09:19:01 | 22.409 | 6/18/2011 21:19:01 | 23.296 |
| 6/24/2011 09:59:01 | 25.472 | 6/18/2011 21:59:01 | 23.359 |
| 6/24/2011 10:39:01 | 27.970 | 6/18/2011 22:39:01 | 23.359 |
| 6/24/2011 11:19:01 | 29.406 | 6/18/2011 23:19:01 | 23.359 |
| 6/24/2011 11:59:01 | 30.280 | 6/18/2011 23:59:01 | 23.359 |
| 6/24/2011 12:39:01 | 30.405 | 6/19/2011 00:39:01 | 23.359 |
| 6/24/2011 13:19:01 | 31.028 | 6/19/2011 01:19:01 | 23.359 |
| 6/24/2011 13:59:01 | 31.340 | 6/19/2011 01:59:01 | 23.359 |
| 6/24/2011 14:39:01 | 30.904 | 6/19/2011 02:39:01 | 23.359 |
| 6/24/2011 15:19:01 | 30.093 | 6/19/2011 03:19:01 | 23.359 |
| 6/24/2011 15:59:01 | 27.721 | 6/19/2011 03:59:01 | 23.359 |
| 6/24/2011 16:39:01 | 25.409 | 6/19/2011 04:39:01 | 23.359 |

|                    |        |                    |        |
|--------------------|--------|--------------------|--------|
| 6/24/2011 17:19:01 | 23.847 | 6/19/2011 05:19:01 | 23.296 |
| 6/24/2011 17:59:01 | 22.158 | 6/19/2011 05:59:01 | 23.296 |
| 6/24/2011 18:39:01 | 21.595 | 6/19/2011 06:39:01 | 23.296 |
| 6/24/2011 19:19:01 | 20.782 | 6/19/2011 07:19:01 | 23.296 |
| 6/24/2011 19:59:01 | 19.781 | 6/19/2011 07:59:01 | 23.296 |
| 6/24/2011 20:39:01 | 19.155 | 6/19/2011 08:39:01 | 23.234 |
| 6/24/2011 21:19:01 | 18.779 | 6/19/2011 09:19:01 | 23.234 |
| 6/24/2011 21:59:01 | 19.468 | 6/19/2011 09:59:01 | 23.234 |
| 6/24/2011 22:39:01 | 19.092 | 6/19/2011 10:39:01 | 23.234 |
| 6/24/2011 23:19:01 | 19.092 | 6/19/2011 11:19:01 | 23.234 |
| 6/24/2011 23:59:01 | 18.967 | 6/19/2011 11:59:01 | 23.171 |
| 6/25/2011 00:39:01 | 19.343 | 6/19/2011 12:39:01 | 23.234 |
| 6/25/2011 01:19:01 | 19.343 | 6/19/2011 13:19:01 | 23.171 |
| 6/25/2011 01:59:01 | 19.405 | 6/19/2011 13:59:01 | 23.234 |
| 6/25/2011 02:39:01 | 19.029 | 6/19/2011 14:39:01 | 23.234 |
| 6/25/2011 03:19:01 | 18.341 | 6/19/2011 15:19:01 | 23.234 |
| 6/25/2011 03:59:01 | 17.652 | 6/19/2011 15:59:01 | 23.296 |
| 6/25/2011 04:39:01 | 16.837 | 6/19/2011 16:39:01 | 23.296 |
| 6/25/2011 05:19:01 | 16.587 | 6/19/2011 17:19:01 | 23.296 |
| 6/25/2011 05:59:01 | 16.211 | 6/19/2011 17:59:01 | 23.359 |
| 6/25/2011 06:39:01 | 16.274 | 6/19/2011 18:39:01 | 23.359 |
| 6/25/2011 07:19:01 | 17.401 | 6/19/2011 19:19:01 | 23.421 |
| 6/25/2011 07:59:01 | 18.842 | 6/19/2011 19:59:01 | 23.421 |
| 6/25/2011 08:39:01 | 21.658 | 6/19/2011 20:39:01 | 23.421 |
| 6/25/2011 09:19:01 | 23.972 | 6/19/2011 21:19:01 | 23.484 |
| 6/25/2011 09:59:01 | 25.534 | 6/19/2011 21:59:01 | 23.484 |
| 6/25/2011 10:39:01 | 27.159 | 6/19/2011 22:39:01 | 23.484 |
| 6/25/2011 11:19:01 | 29.406 | 6/19/2011 23:19:01 | 23.484 |
| 6/25/2011 11:59:01 | 27.908 | 6/19/2011 23:59:01 | 23.484 |
| 6/25/2011 12:39:01 | 28.657 | 6/20/2011 00:39:01 | 23.484 |
| 6/25/2011 13:19:01 | 30.093 | 6/20/2011 01:19:01 | 23.484 |
| 6/25/2011 13:59:01 | 30.467 | 6/20/2011 01:59:01 | 23.484 |
| 6/25/2011 14:39:01 | 29.281 | 6/20/2011 02:39:01 | 23.484 |
| 6/25/2011 15:19:01 | 29.344 | 6/20/2011 03:19:01 | 23.484 |
| 6/25/2011 15:59:01 | 26.784 | 6/20/2011 03:59:01 | 23.484 |
| 6/25/2011 16:39:01 | 24.409 | 6/20/2011 04:39:01 | 23.484 |
| 6/25/2011 17:19:01 | 23.097 | 6/20/2011 05:19:01 | 23.484 |
| 6/25/2011 17:59:01 | 21.783 | 6/20/2011 05:59:01 | 23.484 |
| 6/25/2011 18:39:01 | 20.281 | 6/20/2011 06:39:01 | 23.484 |
| 6/25/2011 19:19:01 | 19.217 | 6/20/2011 07:19:01 | 23.484 |
| 6/25/2011 19:59:01 | 18.591 | 6/20/2011 07:59:01 | 23.421 |
| 6/25/2011 20:39:01 | 18.278 | 6/20/2011 08:39:01 | 23.421 |
| 6/25/2011 21:19:01 | 18.215 | 6/20/2011 09:19:01 | 23.421 |
| 6/25/2011 21:59:01 | 18.153 | 6/20/2011 09:59:01 | 23.421 |
| 6/25/2011 22:39:01 | 17.965 | 6/20/2011 10:39:01 | 23.421 |
| 6/25/2011 23:19:01 | 17.777 | 6/20/2011 11:19:01 | 23.421 |
| 6/25/2011 23:59:01 | 17.840 | 6/20/2011 11:59:01 | 23.421 |
| 6/26/2011 00:39:01 | 17.777 | 6/20/2011 12:39:01 | 23.421 |
| 6/26/2011 01:19:01 | 17.902 | 6/20/2011 13:19:01 | 23.421 |
| 6/26/2011 01:59:01 | 17.902 | 6/20/2011 13:59:01 | 23.421 |

|                    |        |                    |        |
|--------------------|--------|--------------------|--------|
| 6/26/2011 02:39:01 | 18.028 | 6/20/2011 14:39:01 | 23.421 |
| 6/26/2011 03:19:01 | 17.589 | 6/20/2011 15:19:01 | 23.484 |
| 6/26/2011 03:59:01 | 17.088 | 6/20/2011 15:59:01 | 23.484 |
| 6/26/2011 04:39:01 | 16.775 | 6/20/2011 16:39:01 | 23.484 |
| 6/26/2011 05:19:01 | 16.399 | 6/20/2011 17:19:01 | 23.547 |
| 6/26/2011 05:59:01 | 15.960 | 6/20/2011 17:59:01 | 23.547 |
| 6/26/2011 06:39:01 | 16.023 | 6/20/2011 18:39:01 | 23.547 |
| 6/26/2011 07:19:01 | 16.712 | 6/20/2011 19:19:01 | 23.609 |
| 6/26/2011 07:59:01 | 19.217 | 6/20/2011 19:59:01 | 23.609 |
| 6/26/2011 08:39:01 | 22.346 | 6/20/2011 20:39:01 | 23.609 |
| 6/26/2011 09:19:01 | 24.847 | 6/20/2011 21:19:01 | 23.609 |
| 6/26/2011 09:59:01 | 27.034 | 6/20/2011 21:59:01 | 23.672 |
| 6/26/2011 10:39:01 | 29.281 | 6/20/2011 22:39:01 | 23.672 |
| 6/26/2011 11:19:01 | 29.531 | 6/20/2011 23:19:01 | 23.672 |
| 6/26/2011 11:59:01 | 29.656 | 6/20/2011 23:59:01 | 23.672 |
| 6/26/2011 12:39:01 | 30.280 | 6/21/2011 00:39:01 | 23.672 |
| 6/26/2011 13:19:01 | 30.155 | 6/21/2011 01:19:01 | 23.672 |
| 6/26/2011 13:59:01 | 30.342 | 6/21/2011 01:59:01 | 23.672 |
| 6/26/2011 14:39:01 | 30.155 | 6/21/2011 02:39:01 | 23.609 |
| 6/26/2011 15:19:01 | 29.781 | 6/21/2011 03:19:01 | 23.609 |
| 6/26/2011 15:59:01 | 28.095 | 6/21/2011 03:59:01 | 23.609 |
| 6/26/2011 16:39:01 | 26.534 | 6/21/2011 04:39:01 | 23.609 |
| 6/26/2011 17:19:01 | 25.159 | 6/21/2011 05:19:01 | 23.609 |
| 6/26/2011 17:59:01 | 23.659 | 6/21/2011 05:59:01 | 23.547 |
| 6/26/2011 18:39:01 | 22.909 | 6/21/2011 06:39:01 | 23.547 |
| 6/26/2011 19:19:01 | 22.158 | 6/21/2011 07:19:01 | 23.547 |
| 6/26/2011 19:59:01 | 21.658 | 6/21/2011 07:59:01 | 23.484 |
| 6/26/2011 20:39:01 | 21.157 | 6/21/2011 08:39:01 | 23.484 |
| 6/26/2011 21:19:01 | 21.032 | 6/21/2011 09:19:01 | 23.484 |
| 6/26/2011 21:59:01 | 20.907 | 6/21/2011 09:59:01 | 23.421 |
| 6/26/2011 22:39:01 | 20.156 | 6/21/2011 10:39:01 | 23.421 |
| 6/26/2011 23:19:01 | 19.217 | 6/21/2011 11:19:01 | 23.421 |
| 6/26/2011 23:59:01 | 18.529 | 6/21/2011 11:59:01 | 23.421 |
| 6/27/2011 00:39:01 | 17.714 | 6/21/2011 12:39:01 | 23.421 |
| 6/27/2011 01:19:01 | 17.025 | 6/21/2011 13:19:01 | 23.421 |
| 6/27/2011 01:59:01 | 16.712 | 6/21/2011 13:59:01 | 23.421 |
| 6/27/2011 02:39:01 | 17.401 | 6/21/2011 14:39:01 | 23.421 |
| 6/27/2011 03:19:01 | 17.088 | 6/21/2011 15:19:01 | 23.421 |
| 6/27/2011 03:59:01 | 16.963 | 6/21/2011 15:59:01 | 23.421 |
| 6/27/2011 04:39:01 | 16.274 | 6/21/2011 16:39:01 | 23.421 |
| 6/27/2011 05:19:01 | 15.898 | 6/21/2011 17:19:01 | 23.484 |
| 6/27/2011 05:59:01 | 15.271 | 6/21/2011 17:59:01 | 23.484 |
| 6/27/2011 06:39:01 | 14.957 | 6/21/2011 18:39:01 | 23.484 |
| 6/27/2011 07:19:01 | 15.459 | 6/21/2011 19:19:01 | 23.484 |
| 6/27/2011 07:59:01 | 17.527 | 6/21/2011 19:59:01 | 23.547 |
| 6/27/2011 08:39:01 | 20.657 | 6/21/2011 20:39:01 | 23.547 |
| 6/27/2011 09:19:01 | 23.909 | 6/21/2011 21:19:01 | 23.547 |
| 6/27/2011 09:59:01 | 26.659 | 6/21/2011 21:59:01 | 23.547 |
| 6/27/2011 10:39:01 | 29.219 | 6/21/2011 22:39:01 | 23.547 |
| 6/27/2011 11:19:01 | 30.280 | 6/21/2011 23:19:01 | 23.547 |

|                    |        |                    |        |
|--------------------|--------|--------------------|--------|
| 6/27/2011 11:59:01 | 30.654 | 6/21/2011 23:59:01 | 23.547 |
| 6/27/2011 12:39:01 | 31.403 | 6/22/2011 00:39:01 | 23.547 |
| 6/27/2011 13:19:01 | 31.590 | 6/22/2011 01:19:01 | 23.484 |
| 6/27/2011 13:59:01 | 31.652 | 6/22/2011 01:59:01 | 23.484 |
| 6/27/2011 14:39:01 | 31.340 | 6/22/2011 02:39:01 | 23.484 |
| 6/27/2011 15:19:01 | 30.342 | 6/22/2011 03:19:01 | 23.484 |
| 6/27/2011 15:59:01 | 28.095 | 6/22/2011 03:59:01 | 23.421 |
| 6/27/2011 16:39:01 | 25.409 | 6/22/2011 04:39:01 | 23.421 |
| 6/27/2011 17:19:01 | 23.722 | 6/22/2011 05:19:01 | 23.421 |
| 6/27/2011 17:59:01 | 21.908 | 6/22/2011 05:59:01 | 23.359 |
| 6/27/2011 18:39:01 | 19.968 | 6/22/2011 06:39:01 | 23.359 |
| 6/27/2011 19:19:01 | 18.654 | 6/22/2011 07:19:01 | 23.359 |
| 6/27/2011 19:59:01 | 17.840 | 6/22/2011 07:59:01 | 23.296 |
| 6/27/2011 20:39:01 | 17.401 | 6/22/2011 08:39:01 | 23.296 |
| 6/27/2011 21:19:01 | 17.339 | 6/22/2011 09:19:01 | 23.234 |
| 6/27/2011 21:59:01 | 17.213 | 6/22/2011 09:59:01 | 23.234 |
| 6/27/2011 22:39:01 | 18.215 | 6/22/2011 10:39:01 | 23.234 |
| 6/27/2011 23:19:01 | 17.527 | 6/22/2011 11:19:01 | 23.234 |
| 6/27/2011 23:59:01 | 16.649 | 6/22/2011 11:59:01 | 23.171 |
| 6/28/2011 00:39:01 | 15.960 | 6/22/2011 12:39:01 | 23.171 |
| 6/28/2011 01:19:01 | 15.647 | 6/22/2011 13:19:01 | 23.171 |
| 6/28/2011 01:59:01 | 15.333 | 6/22/2011 13:59:01 | 23.171 |
| 6/28/2011 02:39:01 | 15.020 | 6/22/2011 14:39:01 | 23.234 |
| 6/28/2011 03:19:01 | 14.832 | 6/22/2011 15:19:01 | 23.234 |
| 6/28/2011 03:59:01 | 14.895 | 6/22/2011 15:59:01 | 23.234 |
| 6/28/2011 04:39:01 | 15.835 | 6/22/2011 16:39:01 | 23.234 |
| 6/28/2011 05:19:01 | 16.900 | 6/22/2011 17:19:01 | 23.296 |
| 6/28/2011 05:59:01 | 17.464 | 6/22/2011 17:59:01 | 23.296 |
| 6/28/2011 06:39:01 | 17.276 | 6/22/2011 18:39:01 | 23.296 |
| 6/28/2011 07:19:01 | 17.401 | 6/22/2011 19:19:01 | 23.359 |
| 6/28/2011 07:59:01 | 18.403 | 6/22/2011 19:59:01 | 23.359 |
| 6/28/2011 08:39:01 | 19.906 | 6/22/2011 20:39:01 | 23.359 |
| 6/28/2011 09:19:01 | 23.347 | 6/22/2011 21:19:01 | 23.421 |
| 6/28/2011 09:59:01 | 26.846 | 6/22/2011 21:59:01 | 23.421 |
| 6/28/2011 10:39:01 | 29.281 | 6/22/2011 22:39:01 | 23.421 |
| 6/28/2011 11:19:01 | 30.280 | 6/22/2011 23:19:01 | 23.421 |
| 6/28/2011 11:59:01 | 30.592 | 6/22/2011 23:59:01 | 23.421 |
| 6/28/2011 12:39:01 | 31.216 | 6/23/2011 00:39:01 | 23.359 |
| 6/28/2011 13:19:01 | 31.028 | 6/23/2011 01:19:01 | 23.359 |
| 6/28/2011 13:59:01 | 31.403 | 6/23/2011 01:59:01 | 23.359 |
| 6/28/2011 14:39:01 | 30.342 | 6/23/2011 02:39:01 | 23.359 |
| 6/28/2011 15:19:01 | 30.717 | 6/23/2011 03:19:01 | 23.296 |
| 6/28/2011 15:59:01 | 28.407 | 6/23/2011 03:59:01 | 23.296 |
| 6/28/2011 16:39:01 | 26.909 | 6/23/2011 04:39:01 | 23.296 |
| 6/28/2011 17:19:01 | 25.347 | 6/23/2011 05:19:01 | 23.296 |
| 6/28/2011 17:59:01 | 23.909 | 6/23/2011 05:59:01 | 23.234 |
| 6/28/2011 18:39:01 | 23.409 | 6/23/2011 06:39:01 | 23.234 |
| 6/28/2011 19:19:01 | 22.846 | 6/23/2011 07:19:01 | 23.234 |
| 6/28/2011 19:59:01 | 22.596 | 6/23/2011 07:59:01 | 23.234 |
| 6/28/2011 20:39:01 | 22.534 | 6/23/2011 08:39:01 | 23.171 |



|                    |        |                    |        |
|--------------------|--------|--------------------|--------|
| 6/28/2011 21:19:01 | 22.033 | 6/23/2011 09:19:01 | 23.171 |
| 6/28/2011 21:59:01 | 21.846 | 6/23/2011 09:59:01 | 23.171 |
| 6/28/2011 22:39:01 | 21.908 | 6/23/2011 10:39:01 | 23.109 |
| 6/28/2011 23:19:01 | 22.033 | 6/23/2011 11:19:01 | 23.109 |
| 6/28/2011 23:59:01 | 22.784 | 6/23/2011 11:59:01 | 23.109 |
| 6/29/2011 00:39:01 | 22.659 | 6/23/2011 12:39:01 | 23.109 |
| 6/29/2011 01:19:01 | 22.409 | 6/23/2011 13:19:01 | 23.109 |
| 6/29/2011 01:59:01 | 22.033 | 6/23/2011 13:59:01 | 23.109 |
| 6/29/2011 02:39:01 | 21.721 | 6/23/2011 14:39:01 | 23.171 |
| 6/29/2011 03:19:01 | 21.658 | 6/23/2011 15:19:01 | 23.171 |
| 6/29/2011 03:59:01 | 21.721 | 6/23/2011 15:59:01 | 23.234 |
| 6/29/2011 04:39:01 | 21.408 | 6/23/2011 16:39:01 | 23.234 |
| 6/29/2011 05:19:01 | 21.095 | 6/23/2011 17:19:01 | 23.234 |
| 6/29/2011 05:59:01 | 21.283 | 6/23/2011 17:59:01 | 23.296 |
| 6/29/2011 06:39:01 | 21.220 | 6/23/2011 18:39:01 | 23.296 |
| 6/29/2011 07:19:01 | 21.721 | 6/23/2011 19:19:01 | 23.359 |
| 6/29/2011 07:59:01 | 23.097 | 6/23/2011 19:59:01 | 23.359 |
| 6/29/2011 08:39:01 | 24.909 | 6/23/2011 20:39:01 | 23.359 |
| 6/29/2011 09:19:01 | 26.659 | 6/23/2011 21:19:01 | 23.421 |
| 6/29/2011 09:59:01 | 28.158 | 6/23/2011 21:59:01 | 23.421 |
| 6/29/2011 10:39:01 | 30.030 | 6/23/2011 22:39:01 | 23.421 |
| 6/29/2011 11:19:01 | 30.342 | 6/23/2011 23:19:01 | 23.421 |
| 6/29/2011 11:59:01 | 30.093 | 6/23/2011 23:59:01 | 23.421 |
| 6/29/2011 12:39:01 | 31.091 | 6/24/2011 00:39:01 | 23.421 |
| 6/29/2011 13:19:01 | 31.652 | 6/24/2011 01:19:01 | 23.359 |
| 6/29/2011 13:59:01 | 31.839 | 6/24/2011 01:59:01 | 23.359 |
| 6/29/2011 14:39:01 | 31.839 | 6/24/2011 02:39:01 | 23.359 |
| 6/29/2011 15:19:01 | 31.403 | 6/24/2011 03:19:01 | 23.359 |
| 6/29/2011 15:59:01 | 30.405 | 6/24/2011 03:59:01 | 23.359 |
| 6/29/2011 16:39:01 | 28.782 | 6/24/2011 04:39:01 | 23.296 |
| 6/29/2011 17:19:01 | 26.409 | 6/24/2011 05:19:01 | 23.296 |
| 6/29/2011 17:59:01 | 24.347 | 6/24/2011 05:59:01 | 23.234 |
| 6/29/2011 18:39:01 | 22.971 | 6/24/2011 06:39:01 | 23.234 |
| 6/29/2011 19:19:01 | 22.284 | 6/24/2011 07:19:01 | 23.171 |
| 6/29/2011 19:59:01 | 22.284 | 6/24/2011 07:59:01 | 23.171 |
| 6/29/2011 20:39:01 | 23.034 | 6/24/2011 08:39:01 | 23.109 |
| 6/29/2011 21:19:01 | 23.409 | 6/24/2011 09:19:01 | 23.109 |
| 6/29/2011 21:59:01 | 23.534 | 6/24/2011 09:59:01 | 23.046 |
| 6/29/2011 22:39:01 | 22.909 | 6/24/2011 10:39:01 | 23.046 |
| 6/29/2011 23:19:01 | 22.909 | 6/24/2011 11:19:01 | 22.984 |
| 6/29/2011 23:59:01 | 22.784 | 6/24/2011 11:59:01 | 22.984 |
| 6/30/2011 00:39:01 | 23.034 | 6/24/2011 12:39:01 | 22.984 |
| 6/30/2011 01:19:01 | 22.534 | 6/24/2011 13:19:01 | 22.984 |
| 6/30/2011 01:59:01 | 22.409 | 6/24/2011 13:59:01 | 22.984 |
| 6/30/2011 02:39:01 | 22.221 | 6/24/2011 14:39:01 | 22.984 |
| 6/30/2011 03:19:01 | 22.284 | 6/24/2011 15:19:01 | 23.046 |
| 6/30/2011 03:59:01 | 21.408 | 6/24/2011 15:59:01 | 23.046 |
| 6/30/2011 04:39:01 | 19.968 | 6/24/2011 16:39:01 | 23.046 |
| 6/30/2011 05:19:01 | 19.155 | 6/24/2011 17:19:01 | 23.109 |
| 6/30/2011 05:59:01 | 18.716 | 6/24/2011 17:59:01 | 23.109 |

|                    |        |                    |        |
|--------------------|--------|--------------------|--------|
| 6/30/2011 06:39:01 | 18.716 | 6/24/2011 18:39:01 | 23.171 |
| 6/30/2011 07:19:01 | 19.343 | 6/24/2011 19:19:01 | 23.171 |
| 6/30/2011 07:59:01 | 20.907 | 6/24/2011 19:59:01 | 23.171 |
| 6/30/2011 08:39:01 | 23.472 | 6/24/2011 20:39:01 | 23.234 |
| 6/30/2011 09:19:01 | 25.722 | 6/24/2011 21:19:01 | 23.234 |
| 6/30/2011 09:59:01 | 27.908 | 6/24/2011 21:59:01 | 23.234 |
| 6/30/2011 10:39:01 | 29.843 | 6/24/2011 22:39:01 | 23.234 |
| 6/30/2011 11:19:01 | 30.467 | 6/24/2011 23:19:01 | 23.296 |
| 6/30/2011 11:59:01 | 30.966 | 6/24/2011 23:59:01 | 23.296 |
| 6/30/2011 12:39:01 | 31.527 | 6/25/2011 00:39:01 | 23.234 |
| 6/30/2011 13:19:01 | 30.966 | 6/25/2011 01:19:01 | 23.234 |
| 6/30/2011 13:59:01 | 31.403 | 6/25/2011 01:59:01 | 23.234 |
| 6/30/2011 14:39:01 | 31.216 | 6/25/2011 02:39:01 | 23.234 |
| 6/30/2011 15:19:01 | 30.841 | 6/25/2011 03:19:01 | 23.234 |
| 6/30/2011 15:59:01 | 29.219 | 6/25/2011 03:59:01 | 23.234 |
| 6/30/2011 16:39:01 | 26.784 | 6/25/2011 04:39:01 | 23.171 |
| 6/30/2011 17:19:01 | 25.159 | 6/25/2011 05:19:01 | 23.171 |
| 6/30/2011 17:59:01 | 23.659 | 6/25/2011 05:59:01 | 23.171 |
| 6/30/2011 18:39:01 | 22.221 | 6/25/2011 06:39:01 | 23.171 |
| 6/30/2011 19:19:01 | 21.157 | 6/25/2011 07:19:01 | 23.109 |
| 6/30/2011 19:59:01 | 20.657 | 6/25/2011 07:59:01 | 23.109 |
| 6/30/2011 20:39:01 | 21.220 | 6/25/2011 08:39:01 | 23.109 |
| 6/30/2011 21:19:01 | 21.283 | 6/25/2011 09:19:01 | 23.109 |
| 6/30/2011 21:59:01 | 20.845 | 6/25/2011 09:59:01 | 23.046 |
| 6/30/2011 22:39:01 | 20.532 | 6/25/2011 10:39:01 | 23.046 |
| 6/30/2011 23:19:01 | 20.657 | 6/25/2011 11:19:01 | 23.046 |
| 6/30/2011 23:59:01 | 20.657 | 6/25/2011 11:59:01 | 23.046 |
| 7/1/2011 00:39:01  | 20.469 | 6/25/2011 12:39:01 | 23.046 |
| 7/1/2011 01:19:01  | 19.968 | 6/25/2011 13:19:01 | 23.046 |
| 7/1/2011 01:59:01  | 19.343 | 6/25/2011 13:59:01 | 23.046 |
| 7/1/2011 02:39:01  | 18.904 | 6/25/2011 14:39:01 | 23.046 |
| 7/1/2011 03:19:01  | 18.779 | 6/25/2011 15:19:01 | 23.046 |
| 7/1/2011 03:59:01  | 18.215 | 6/25/2011 15:59:01 | 23.109 |
| 7/1/2011 04:39:01  | 17.714 | 6/25/2011 16:39:01 | 23.109 |
| 7/1/2011 05:19:01  | 17.464 | 6/25/2011 17:19:01 | 23.171 |
| 7/1/2011 05:59:01  | 16.712 | 6/25/2011 17:59:01 | 23.171 |
| 7/1/2011 06:39:01  | 16.462 | 6/25/2011 18:39:01 | 23.171 |
| 7/1/2011 07:19:01  | 16.837 | 6/25/2011 19:19:01 | 23.234 |
| 7/1/2011 07:59:01  | 18.779 | 6/25/2011 19:59:01 | 23.234 |
| 7/1/2011 08:39:01  | 21.470 | 6/25/2011 20:39:01 | 23.234 |
| 7/1/2011 09:19:01  | 24.097 | 6/25/2011 21:19:01 | 23.296 |
| 7/1/2011 09:59:01  | 26.222 | 6/25/2011 21:59:01 | 23.296 |
| 7/1/2011 10:39:01  | 29.094 | 6/25/2011 22:39:01 | 23.296 |
| 7/1/2011 11:19:01  | 29.843 | 6/25/2011 23:19:01 | 23.296 |
| 7/1/2011 11:59:01  | 30.217 | 6/25/2011 23:59:01 | 23.296 |
| 7/1/2011 12:39:01  | 30.779 | 6/26/2011 00:39:01 | 23.234 |
| 7/1/2011 13:19:01  | 30.904 | 6/26/2011 01:19:01 | 23.234 |
| 7/1/2011 13:59:01  | 30.966 | 6/26/2011 01:59:01 | 23.234 |
| 7/1/2011 14:39:01  | 31.340 | 6/26/2011 02:39:01 | 23.234 |
| 7/1/2011 15:19:01  | 29.406 | 6/26/2011 03:19:01 | 23.234 |

|                   |        |                    |        |
|-------------------|--------|--------------------|--------|
| 7/1/2011 15:59:01 | 27.596 | 6/26/2011 03:59:01 | 23.171 |
| 7/1/2011 16:39:01 | 25.659 | 6/26/2011 04:39:01 | 23.171 |
| 7/1/2011 17:19:01 | 23.722 | 6/26/2011 05:19:01 | 23.171 |
| 7/1/2011 17:59:01 | 22.096 | 6/26/2011 05:59:01 | 23.109 |
| 7/1/2011 18:39:01 | 20.719 | 6/26/2011 06:39:01 | 23.109 |
| 7/1/2011 19:19:01 | 20.031 | 6/26/2011 07:19:01 | 23.109 |
| 7/1/2011 19:59:01 | 19.530 | 6/26/2011 07:59:01 | 23.046 |
| 7/1/2011 20:39:01 | 19.343 | 6/26/2011 08:39:01 | 23.046 |
| 7/1/2011 21:19:01 | 19.781 | 6/26/2011 09:19:01 | 23.046 |
| 7/1/2011 21:59:01 | 19.906 | 6/26/2011 09:59:01 | 22.984 |
| 7/1/2011 22:39:01 | 19.656 | 6/26/2011 10:39:01 | 22.984 |
| 7/1/2011 23:19:01 | 19.280 | 6/26/2011 11:19:01 | 22.984 |
| 7/1/2011 23:59:01 | 18.904 | 6/26/2011 11:59:01 | 22.984 |
| 7/2/2011 00:39:01 | 18.278 | 6/26/2011 12:39:01 | 22.984 |
| 7/2/2011 01:19:01 | 17.401 | 6/26/2011 13:19:01 | 22.984 |
| 7/2/2011 01:59:01 | 17.151 | 6/26/2011 13:59:01 | 22.984 |
| 7/2/2011 02:39:01 | 16.775 | 6/26/2011 14:39:01 | 22.984 |
| 7/2/2011 03:19:01 | 16.274 | 6/26/2011 15:19:01 | 23.046 |
| 7/2/2011 03:59:01 | 16.148 | 6/26/2011 15:59:01 | 23.046 |
| 7/2/2011 04:39:01 | 16.023 | 6/26/2011 16:39:01 | 23.109 |
| 7/2/2011 05:19:01 | 16.649 | 6/26/2011 17:19:01 | 23.109 |
| 7/2/2011 05:59:01 | 16.211 | 6/26/2011 17:59:01 | 23.109 |
| 7/2/2011 06:39:01 | 16.023 | 6/26/2011 18:39:01 | 23.171 |
| 7/2/2011 07:19:01 | 16.963 | 6/26/2011 19:19:01 | 23.171 |
| 7/2/2011 07:59:01 | 18.341 | 6/26/2011 19:59:01 | 23.171 |
| 7/2/2011 08:39:01 | 20.845 | 6/26/2011 20:39:01 | 23.234 |
| 7/2/2011 09:19:01 | 23.659 | 6/26/2011 21:19:01 | 23.234 |
| 7/2/2011 09:59:01 | 25.659 | 6/26/2011 21:59:01 | 23.234 |
| 7/2/2011 10:39:01 | 28.470 | 6/26/2011 22:39:01 | 23.234 |
| 7/2/2011 11:19:01 | 29.593 | 6/26/2011 23:19:01 | 23.296 |
| 7/2/2011 11:59:01 | 30.093 | 6/26/2011 23:59:01 | 23.296 |
| 7/2/2011 12:39:01 | 29.843 | 6/27/2011 00:39:01 | 23.296 |
| 7/2/2011 13:19:01 | 29.905 | 6/27/2011 01:19:01 | 23.296 |
| 7/2/2011 13:59:01 | 30.467 | 6/27/2011 01:59:01 | 23.296 |
| 7/2/2011 14:39:01 | 29.531 | 6/27/2011 02:39:01 | 23.296 |
| 7/2/2011 15:19:01 | 29.781 | 6/27/2011 03:19:01 | 23.234 |
| 7/2/2011 15:59:01 | 27.721 | 6/27/2011 03:59:01 | 23.234 |
| 7/2/2011 16:39:01 | 24.972 | 6/27/2011 04:39:01 | 23.234 |
| 7/2/2011 17:19:01 | 22.909 | 6/27/2011 05:19:01 | 23.234 |
| 7/2/2011 17:59:01 | 21.220 | 6/27/2011 05:59:01 | 23.171 |
| 7/2/2011 18:39:01 | 19.155 | 6/27/2011 06:39:01 | 23.171 |
| 7/2/2011 19:19:01 | 18.153 | 6/27/2011 07:19:01 | 23.109 |
| 7/2/2011 19:59:01 | 17.527 | 6/27/2011 07:59:01 | 23.109 |
| 7/2/2011 20:39:01 | 16.837 | 6/27/2011 08:39:01 | 23.109 |
| 7/2/2011 21:19:01 | 16.148 | 6/27/2011 09:19:01 | 23.046 |
| 7/2/2011 21:59:01 | 15.647 | 6/27/2011 09:59:01 | 23.046 |
| 7/2/2011 22:39:01 | 15.083 | 6/27/2011 10:39:01 | 22.984 |
| 7/2/2011 23:19:01 | 14.707 | 6/27/2011 11:19:01 | 22.984 |
| 7/2/2011 23:59:01 | 14.205 | 6/27/2011 11:59:01 | 22.984 |
| 7/3/2011 00:39:01 | 13.954 | 6/27/2011 12:39:01 | 22.984 |

|                   |        |                    |        |
|-------------------|--------|--------------------|--------|
| 7/3/2011 01:19:01 | 13.641 | 6/27/2011 13:19:01 | 22.984 |
| 7/3/2011 01:59:01 | 13.453 | 6/27/2011 13:59:01 | 22.984 |
| 7/3/2011 02:39:01 | 13.327 | 6/27/2011 14:39:01 | 22.984 |
| 7/3/2011 03:19:01 | 13.076 | 6/27/2011 15:19:01 | 22.984 |
| 7/3/2011 03:59:01 | 13.139 | 6/27/2011 15:59:01 | 23.046 |
| 7/3/2011 04:39:01 | 13.139 | 6/27/2011 16:39:01 | 23.046 |
| 7/3/2011 05:19:01 | 12.888 | 6/27/2011 17:19:01 | 23.046 |
| 7/3/2011 05:59:01 | 12.574 | 6/27/2011 17:59:01 | 23.109 |
| 7/3/2011 06:39:01 | 12.324 | 6/27/2011 18:39:01 | 23.109 |
| 7/3/2011 07:19:01 | 13.014 | 6/27/2011 19:19:01 | 23.171 |
| 7/3/2011 07:59:01 | 15.271 | 6/27/2011 19:59:01 | 23.171 |
| 7/3/2011 08:39:01 | 18.341 | 6/27/2011 20:39:01 | 23.171 |
| 7/3/2011 09:19:01 | 22.221 | 6/27/2011 21:19:01 | 23.171 |
| 7/3/2011 09:59:01 | 25.409 | 6/27/2011 21:59:01 | 23.171 |
| 7/3/2011 10:39:01 | 29.032 | 6/27/2011 22:39:01 | 23.171 |
| 7/3/2011 11:19:01 | 29.905 | 6/27/2011 23:19:01 | 23.171 |
| 7/3/2011 11:59:01 | 30.342 | 6/27/2011 23:59:01 | 23.171 |
| 7/3/2011 12:39:01 | 30.592 | 6/28/2011 00:39:01 | 23.171 |
| 7/3/2011 13:19:01 | 30.717 | 6/28/2011 01:19:01 | 23.171 |
| 7/3/2011 13:59:01 | 28.595 | 6/28/2011 01:59:01 | 23.109 |
| 7/3/2011 14:39:01 | 29.593 | 6/28/2011 02:39:01 | 23.109 |
| 7/3/2011 15:19:01 | 29.344 | 6/28/2011 03:19:01 | 23.109 |
| 7/3/2011 15:59:01 | 28.220 | 6/28/2011 03:59:01 | 23.109 |
| 7/3/2011 16:39:01 | 25.534 | 6/28/2011 04:39:01 | 23.046 |
| 7/3/2011 17:19:01 | 23.159 | 6/28/2011 05:19:01 | 23.046 |
| 7/3/2011 17:59:01 | 21.032 | 6/28/2011 05:59:01 | 22.984 |
| 7/3/2011 18:39:01 | 19.468 | 6/28/2011 06:39:01 | 22.984 |
| 7/3/2011 19:19:01 | 18.403 | 6/28/2011 07:19:01 | 22.921 |
| 7/3/2011 19:59:01 | 17.714 | 6/28/2011 07:59:01 | 22.921 |
| 7/3/2011 20:39:01 | 17.151 | 6/28/2011 08:39:01 | 22.921 |
| 7/3/2011 21:19:01 | 16.399 | 6/28/2011 09:19:01 | 22.859 |
| 7/3/2011 21:59:01 | 15.647 | 6/28/2011 09:59:01 | 22.859 |
| 7/3/2011 22:39:01 | 15.083 | 6/28/2011 10:39:01 | 22.859 |
| 7/3/2011 23:19:01 | 14.707 | 6/28/2011 11:19:01 | 22.796 |
| 7/3/2011 23:59:01 | 14.268 | 6/28/2011 11:59:01 | 22.796 |
| 7/4/2011 00:39:01 | 13.892 | 6/28/2011 12:39:01 | 22.796 |
| 7/4/2011 01:19:01 | 13.703 | 6/28/2011 13:19:01 | 22.796 |
| 7/4/2011 01:59:01 | 13.264 | 6/28/2011 13:59:01 | 22.859 |
| 7/4/2011 02:39:01 | 13.014 | 6/28/2011 14:39:01 | 22.859 |
| 7/4/2011 03:19:01 | 12.637 | 6/28/2011 15:19:01 | 22.859 |
| 7/4/2011 03:59:01 | 12.386 | 6/28/2011 15:59:01 | 22.921 |
| 7/4/2011 04:39:01 | 12.386 | 6/28/2011 16:39:01 | 22.921 |
| 7/4/2011 05:19:01 | 12.386 | 6/28/2011 17:19:01 | 22.984 |
| 7/4/2011 05:59:01 | 12.324 | 6/28/2011 17:59:01 | 22.984 |
| 7/4/2011 06:39:01 | 12.261 | 6/28/2011 18:39:01 | 23.046 |
| 7/4/2011 07:19:01 | 12.951 | 6/28/2011 19:19:01 | 23.046 |
| 7/4/2011 07:59:01 | 15.083 | 6/28/2011 19:59:01 | 23.109 |
| 7/4/2011 08:39:01 | 18.090 | 6/28/2011 20:39:01 | 23.109 |
| 7/4/2011 09:19:01 | 21.721 | 6/28/2011 21:19:01 | 23.109 |
| 7/4/2011 09:59:01 | 25.034 | 6/28/2011 21:59:01 | 23.171 |

|                   |        |                    |        |
|-------------------|--------|--------------------|--------|
| 7/4/2011 10:39:01 | 28.158 | 6/28/2011 22:39:01 | 23.171 |
| 7/4/2011 11:19:01 | 29.157 | 6/28/2011 23:19:01 | 23.171 |
| 7/4/2011 11:59:01 | 29.469 | 6/28/2011 23:59:01 | 23.234 |
| 7/4/2011 12:39:01 | 30.405 | 6/29/2011 00:39:01 | 23.234 |
| 7/4/2011 13:19:01 | 30.405 | 6/29/2011 01:19:01 | 23.234 |
| 7/4/2011 13:59:01 | 30.467 | 6/29/2011 01:59:01 | 23.234 |
| 7/4/2011 14:39:01 | 30.342 | 6/29/2011 02:39:01 | 23.234 |
| 7/4/2011 15:19:01 | 29.905 | 6/29/2011 03:19:01 | 23.234 |
| 7/4/2011 15:59:01 | 27.096 | 6/29/2011 03:59:01 | 23.234 |
| 7/4/2011 16:39:01 | 24.409 | 6/29/2011 04:39:01 | 23.234 |
| 7/4/2011 17:19:01 | 22.534 | 6/29/2011 05:19:01 | 23.234 |
| 7/4/2011 17:59:01 | 20.532 | 6/29/2011 05:59:01 | 23.234 |
| 7/4/2011 18:39:01 | 18.716 | 6/29/2011 06:39:01 | 23.234 |
| 7/4/2011 19:19:01 | 17.339 | 6/29/2011 07:19:01 | 23.296 |
| 7/4/2011 19:59:01 | 16.399 | 6/29/2011 07:59:01 | 23.234 |
| 7/4/2011 20:39:01 | 16.023 | 6/29/2011 08:39:01 | 23.234 |
| 7/4/2011 21:19:01 | 15.647 | 6/29/2011 09:19:01 | 23.234 |
| 7/4/2011 21:59:01 | 15.396 | 6/29/2011 09:59:01 | 23.234 |
| 7/4/2011 22:39:01 | 15.208 | 6/29/2011 10:39:01 | 23.234 |
| 7/4/2011 23:19:01 | 14.832 | 6/29/2011 11:19:01 | 23.234 |
| 7/4/2011 23:59:01 | 14.581 | 6/29/2011 11:59:01 | 23.234 |
| 7/5/2011 00:39:01 | 14.205 | 6/29/2011 12:39:01 | 23.296 |
| 7/5/2011 01:19:01 | 13.766 | 6/29/2011 13:19:01 | 23.296 |
| 7/5/2011 01:59:01 | 13.390 | 6/29/2011 13:59:01 | 23.296 |
| 7/5/2011 02:39:01 | 13.202 | 6/29/2011 14:39:01 | 23.296 |
| 7/5/2011 03:19:01 | 13.014 | 6/29/2011 15:19:01 | 23.359 |
| 7/5/2011 03:59:01 | 12.888 | 6/29/2011 15:59:01 | 23.359 |
| 7/5/2011 04:39:01 | 13.390 | 6/29/2011 16:39:01 | 23.421 |
| 7/5/2011 05:19:01 | 13.766 | 6/29/2011 17:19:01 | 23.421 |
| 7/5/2011 05:59:01 | 13.515 | 6/29/2011 17:59:01 | 23.421 |
| 7/5/2011 06:39:01 | 13.390 | 6/29/2011 18:39:01 | 23.484 |
| 7/5/2011 07:19:01 | 14.017 | 6/29/2011 19:19:01 | 23.484 |
| 7/5/2011 07:59:01 | 16.274 | 6/29/2011 19:59:01 | 23.547 |
| 7/5/2011 08:39:01 | 20.532 | 6/29/2011 20:39:01 | 23.547 |
| 7/5/2011 09:19:01 | 23.972 | 6/29/2011 21:19:01 | 23.547 |
| 7/5/2011 09:59:01 | 26.284 | 6/29/2011 21:59:01 | 23.547 |
| 7/5/2011 10:39:01 | 28.844 | 6/29/2011 22:39:01 | 23.609 |
| 7/5/2011 11:19:01 | 29.281 | 6/29/2011 23:19:01 | 23.547 |
| 7/5/2011 11:59:01 | 29.406 | 6/29/2011 23:59:01 | 23.609 |
| 7/5/2011 12:39:01 | 28.470 | 6/30/2011 00:39:01 | 23.609 |
| 7/5/2011 13:19:01 | 29.781 | 6/30/2011 01:19:01 | 23.547 |
| 7/5/2011 13:59:01 | 30.280 | 6/30/2011 01:59:01 | 23.547 |
| 7/5/2011 14:39:01 | 29.905 | 6/30/2011 02:39:01 | 23.547 |
| 7/5/2011 15:19:01 | 29.469 | 6/30/2011 03:19:01 | 23.547 |
| 7/5/2011 15:59:01 | 28.283 | 6/30/2011 03:59:01 | 23.547 |
| 7/5/2011 16:39:01 | 27.408 | 6/30/2011 04:39:01 | 23.547 |
| 7/5/2011 17:19:01 | 25.659 | 6/30/2011 05:19:01 | 23.547 |
| 7/5/2011 17:59:01 | 24.784 | 6/30/2011 05:59:01 | 23.484 |
| 7/5/2011 18:39:01 | 23.659 | 6/30/2011 06:39:01 | 23.484 |
| 7/5/2011 19:19:01 | 23.284 | 6/30/2011 07:19:01 | 23.484 |

|                   |        |                    |        |
|-------------------|--------|--------------------|--------|
| 7/5/2011 19:59:01 | 23.097 | 6/30/2011 07:59:01 | 23.484 |
| 7/5/2011 20:39:01 | 22.409 | 6/30/2011 08:39:01 | 23.421 |
| 7/5/2011 21:19:01 | 21.846 | 6/30/2011 09:19:01 | 23.421 |
| 7/5/2011 21:59:01 | 21.908 | 6/30/2011 09:59:01 | 23.421 |
| 7/5/2011 22:39:01 | 21.721 | 6/30/2011 10:39:01 | 23.359 |
| 7/5/2011 23:19:01 | 20.907 | 6/30/2011 11:19:01 | 23.359 |
| 7/5/2011 23:59:01 | 19.718 | 6/30/2011 11:59:01 | 23.359 |
| 7/6/2011 00:39:01 | 20.031 | 6/30/2011 12:39:01 | 23.359 |
| 7/6/2011 01:19:01 | 21.157 | 6/30/2011 13:19:01 | 23.359 |
| 7/6/2011 01:59:01 | 19.593 | 6/30/2011 13:59:01 | 23.359 |
| 7/6/2011 02:39:01 | 18.842 | 6/30/2011 14:39:01 | 23.359 |
| 7/6/2011 03:19:01 | 18.591 | 6/30/2011 15:19:01 | 23.421 |
| 7/6/2011 03:59:01 | 18.153 | 6/30/2011 15:59:01 | 23.421 |
| 7/6/2011 04:39:01 | 17.151 | 6/30/2011 16:39:01 | 23.421 |
| 7/6/2011 05:19:01 | 16.649 | 6/30/2011 17:19:01 | 23.484 |
| 7/6/2011 05:59:01 | 16.462 | 6/30/2011 17:59:01 | 23.484 |
| 7/6/2011 06:39:01 | 16.148 | 6/30/2011 18:39:01 | 23.547 |
| 7/6/2011 07:19:01 | 16.649 | 6/30/2011 19:19:01 | 23.547 |
| 7/6/2011 07:59:01 | 18.967 | 6/30/2011 19:59:01 | 23.547 |
| 7/6/2011 08:39:01 | 21.846 | 6/30/2011 20:39:01 | 23.609 |
| 7/6/2011 09:19:01 | 24.097 | 6/30/2011 21:19:01 | 23.609 |
| 7/6/2011 09:59:01 | 26.347 | 6/30/2011 21:59:01 | 23.609 |
| 7/6/2011 10:39:01 | 28.595 | 6/30/2011 22:39:01 | 23.609 |
| 7/6/2011 11:19:01 | 29.032 | 6/30/2011 23:19:01 | 23.609 |
| 7/6/2011 11:59:01 | 29.157 | 6/30/2011 23:59:01 | 23.609 |
| 7/6/2011 12:39:01 | 29.281 | 7/1/2011 00:39:01  | 23.609 |
| 7/6/2011 13:19:01 | 28.969 | 7/1/2011 01:19:01  | 23.609 |
| 7/6/2011 13:59:01 | 29.344 | 7/1/2011 01:59:01  | 23.609 |
| 7/6/2011 14:39:01 | 30.467 | 7/1/2011 02:39:01  | 23.609 |
| 7/6/2011 15:19:01 | 30.405 | 7/1/2011 03:19:01  | 23.609 |
| 7/6/2011 15:59:01 | 26.097 | 7/1/2011 03:59:01  | 23.609 |
| 7/6/2011 16:39:01 | 24.847 | 7/1/2011 04:39:01  | 23.609 |
| 7/6/2011 17:19:01 | 24.659 | 7/1/2011 05:19:01  | 23.547 |
| 7/6/2011 17:59:01 | 22.784 | 7/1/2011 05:59:01  | 23.547 |
| 7/6/2011 18:39:01 | 21.283 | 7/1/2011 06:39:01  | 23.547 |
| 7/6/2011 19:19:01 | 20.344 | 7/1/2011 07:19:01  | 23.484 |
| 7/6/2011 19:59:01 | 19.843 | 7/1/2011 07:59:01  | 23.484 |
| 7/6/2011 20:39:01 | 19.217 | 7/1/2011 08:39:01  | 23.484 |
| 7/6/2011 21:19:01 | 18.779 | 7/1/2011 09:19:01  | 23.421 |
| 7/6/2011 21:59:01 | 18.529 | 7/1/2011 09:59:01  | 23.421 |
| 7/6/2011 22:39:01 | 18.028 | 7/1/2011 10:39:01  | 23.421 |
| 7/6/2011 23:19:01 | 19.029 | 7/1/2011 11:19:01  | 23.359 |
| 7/6/2011 23:59:01 | 19.593 | 7/1/2011 11:59:01  | 23.359 |
| 7/7/2011 00:39:01 | 19.280 | 7/1/2011 12:39:01  | 23.359 |
| 7/7/2011 01:19:01 | 18.466 | 7/1/2011 13:19:01  | 23.359 |
| 7/7/2011 01:59:01 | 17.464 | 7/1/2011 13:59:01  | 23.359 |
| 7/7/2011 02:39:01 | 16.336 | 7/1/2011 14:39:01  | 23.359 |
| 7/7/2011 03:19:01 | 15.772 | 7/1/2011 15:19:01  | 23.359 |
| 7/7/2011 03:59:01 | 15.396 | 7/1/2011 15:59:01  | 23.421 |
| 7/7/2011 04:39:01 | 15.083 | 7/1/2011 16:39:01  | 23.421 |

|                   |        |                   |        |
|-------------------|--------|-------------------|--------|
| 7/7/2011 05:19:01 | 15.396 | 7/1/2011 17:19:01 | 23.421 |
| 7/7/2011 05:59:01 | 15.459 | 7/1/2011 17:59:01 | 23.484 |
| 7/7/2011 06:39:01 | 15.083 | 7/1/2011 18:39:01 | 23.484 |
| 7/7/2011 07:19:01 | 16.148 | 7/1/2011 19:19:01 | 23.484 |
| 7/7/2011 07:59:01 | 18.466 | 7/1/2011 19:59:01 | 23.547 |
| 7/7/2011 08:39:01 | 21.032 | 7/1/2011 20:39:01 | 23.547 |
| 7/7/2011 09:19:01 | 23.347 | 7/1/2011 21:19:01 | 23.547 |
| 7/7/2011 09:59:01 | 25.722 | 7/1/2011 21:59:01 | 23.547 |
| 7/7/2011 10:39:01 | 28.345 | 7/1/2011 22:39:01 | 23.547 |
| 7/7/2011 11:19:01 | 29.094 | 7/1/2011 23:19:01 | 23.547 |
| 7/7/2011 11:59:01 | 29.593 | 7/1/2011 23:59:01 | 23.547 |
| 7/7/2011 12:39:01 | 30.093 | 7/2/2011 00:39:01 | 23.547 |
| 7/7/2011 13:19:01 | 30.529 | 7/2/2011 01:19:01 | 23.547 |
| 7/7/2011 13:59:01 | 30.592 | 7/2/2011 01:59:01 | 23.484 |
| 7/7/2011 14:39:01 | 30.467 | 7/2/2011 02:39:01 | 23.484 |
| 7/7/2011 15:19:01 | 29.968 | 7/2/2011 03:19:01 | 23.484 |
| 7/7/2011 15:59:01 | 27.346 | 7/2/2011 03:59:01 | 23.484 |
| 7/7/2011 16:39:01 | 24.409 | 7/2/2011 04:39:01 | 23.484 |
| 7/7/2011 17:19:01 | 22.284 | 7/2/2011 05:19:01 | 23.421 |
| 7/7/2011 17:59:01 | 20.344 | 7/2/2011 05:59:01 | 23.421 |
| 7/7/2011 18:39:01 | 18.278 | 7/2/2011 06:39:01 | 23.359 |
| 7/7/2011 19:19:01 | 17.025 | 7/2/2011 07:19:01 | 23.359 |
| 7/7/2011 19:59:01 | 16.524 | 7/2/2011 07:59:01 | 23.359 |
| 7/7/2011 20:39:01 | 16.211 | 7/2/2011 08:39:01 | 23.296 |
| 7/7/2011 21:19:01 | 15.772 | 7/2/2011 09:19:01 | 23.296 |
| 7/7/2011 21:59:01 | 16.148 | 7/2/2011 09:59:01 | 23.234 |
| 7/7/2011 22:39:01 | 15.835 | 7/2/2011 10:39:01 | 23.234 |
| 7/7/2011 23:19:01 | 15.333 | 7/2/2011 11:19:01 | 23.234 |
| 7/7/2011 23:59:01 | 14.644 | 7/2/2011 11:59:01 | 23.171 |
| 7/8/2011 00:39:01 | 14.205 | 7/2/2011 12:39:01 | 23.171 |
| 7/8/2011 01:19:01 | 14.957 | 7/2/2011 13:19:01 | 23.171 |
| 7/8/2011 01:59:01 | 14.957 | 7/2/2011 13:59:01 | 23.171 |
| 7/8/2011 02:39:01 | 15.271 | 7/2/2011 14:39:01 | 23.171 |
| 7/8/2011 03:19:01 | 14.832 | 7/2/2011 15:19:01 | 23.234 |
| 7/8/2011 03:59:01 | 13.892 | 7/2/2011 15:59:01 | 23.234 |
| 7/8/2011 04:39:01 | 12.888 | 7/2/2011 16:39:01 | 23.234 |
| 7/8/2011 05:19:01 | 12.449 | 7/2/2011 17:19:01 | 23.234 |
| 7/8/2011 05:59:01 | 12.135 | 7/2/2011 17:59:01 | 23.296 |
| 7/8/2011 06:39:01 | 12.763 | 7/2/2011 18:39:01 | 23.296 |
| 7/8/2011 07:19:01 | 15.020 | 7/2/2011 19:19:01 | 23.296 |
| 7/8/2011 07:59:01 | 17.589 | 7/2/2011 19:59:01 | 23.296 |
| 7/8/2011 08:39:01 | 20.532 | 7/2/2011 20:39:01 | 23.359 |
| 7/8/2011 09:19:01 | 22.784 | 7/2/2011 21:19:01 | 23.359 |
| 7/8/2011 09:59:01 | 25.222 | 7/2/2011 21:59:01 | 23.359 |
| 7/8/2011 10:39:01 | 27.783 | 7/2/2011 22:39:01 | 23.359 |
| 7/8/2011 11:19:01 | 28.720 | 7/2/2011 23:19:01 | 23.296 |
| 7/8/2011 11:59:01 | 29.344 | 7/2/2011 23:59:01 | 23.296 |
| 7/8/2011 12:39:01 | 29.968 | 7/3/2011 00:39:01 | 23.296 |
| 7/8/2011 13:19:01 | 30.654 | 7/3/2011 01:19:01 | 23.234 |
| 7/8/2011 13:59:01 | 30.405 | 7/3/2011 01:59:01 | 23.234 |

|                   |        |                   |        |
|-------------------|--------|-------------------|--------|
| 7/8/2011 14:39:01 | 30.717 | 7/3/2011 02:39:01 | 23.171 |
| 7/8/2011 15:19:01 | 29.656 | 7/3/2011 03:19:01 | 23.171 |
| 7/8/2011 15:59:01 | 27.970 | 7/3/2011 03:59:01 | 23.109 |
| 7/8/2011 16:39:01 | 25.597 | 7/3/2011 04:39:01 | 23.109 |
| 7/8/2011 17:19:01 | 23.034 | 7/3/2011 05:19:01 | 23.046 |
| 7/8/2011 17:59:01 | 20.594 | 7/3/2011 05:59:01 | 23.046 |
| 7/8/2011 18:39:01 | 18.716 | 7/3/2011 06:39:01 | 22.984 |
| 7/8/2011 19:19:01 | 17.339 | 7/3/2011 07:19:01 | 22.984 |
| 7/8/2011 19:59:01 | 16.462 | 7/3/2011 07:59:01 | 22.921 |
| 7/8/2011 20:39:01 | 16.462 | 7/3/2011 08:39:01 | 22.859 |
| 7/8/2011 21:19:01 | 16.775 | 7/3/2011 09:19:01 | 22.859 |
| 7/8/2011 21:59:01 | 16.775 | 7/3/2011 09:59:01 | 22.796 |
| 7/8/2011 22:39:01 | 17.840 | 7/3/2011 10:39:01 | 22.796 |
| 7/8/2011 23:19:01 | 17.714 | 7/3/2011 11:19:01 | 22.734 |
| 7/8/2011 23:59:01 | 17.527 | 7/3/2011 11:59:01 | 22.734 |
| 7/9/2011 00:39:01 | 17.213 | 7/3/2011 12:39:01 | 22.734 |
| 7/9/2011 01:19:01 | 17.401 | 7/3/2011 13:19:01 | 22.671 |
| 7/9/2011 01:59:01 | 17.401 | 7/3/2011 13:59:01 | 22.734 |
| 7/9/2011 02:39:01 | 16.900 | 7/3/2011 14:39:01 | 22.734 |
| 7/9/2011 03:19:01 | 16.148 | 7/3/2011 15:19:01 | 22.734 |
| 7/9/2011 03:59:01 | 15.522 | 7/3/2011 15:59:01 | 22.734 |
| 7/9/2011 04:39:01 | 15.083 | 7/3/2011 16:39:01 | 22.796 |
| 7/9/2011 05:19:01 | 15.271 | 7/3/2011 17:19:01 | 22.796 |
| 7/9/2011 05:59:01 | 16.274 | 7/3/2011 17:59:01 | 22.859 |
| 7/9/2011 06:39:01 | 17.276 | 7/3/2011 18:39:01 | 22.859 |
| 7/9/2011 07:19:01 | 18.341 | 7/3/2011 19:19:01 | 22.921 |
| 7/9/2011 07:59:01 | 19.843 | 7/3/2011 19:59:01 | 22.921 |
| 7/9/2011 08:39:01 | 22.659 | 7/3/2011 20:39:01 | 22.921 |
| 7/9/2011 09:19:01 | 24.409 | 7/3/2011 21:19:01 | 22.921 |
| 7/9/2011 09:59:01 | 26.159 | 7/3/2011 21:59:01 | 22.984 |
| 7/9/2011 10:39:01 | 28.532 | 7/3/2011 22:39:01 | 22.921 |
| 7/9/2011 11:19:01 | 29.157 | 7/3/2011 23:19:01 | 22.921 |
| 7/9/2011 11:59:01 | 29.593 | 7/3/2011 23:59:01 | 22.984 |
| 7/9/2011 12:39:01 | 29.968 | 7/4/2011 00:39:01 | 22.921 |
| 7/9/2011 13:19:01 | 29.905 | 7/4/2011 01:19:01 | 22.921 |
| 7/9/2011 13:59:01 | 30.217 | 7/4/2011 01:59:01 | 22.921 |
| 7/9/2011 14:39:01 | 30.217 | 7/4/2011 02:39:01 | 22.859 |
| 7/9/2011 15:19:01 | 29.843 | 7/4/2011 03:19:01 | 22.859 |
| 7/9/2011 15:59:01 | 28.407 | 7/4/2011 03:59:01 | 22.859 |
| 7/9/2011 16:39:01 | 25.722 | 7/4/2011 04:39:01 | 22.796 |
| 7/9/2011 17:19:01 | 23.659 | 7/4/2011 05:19:01 | 22.796 |
| 7/9/2011 17:59:01 | 21.658 | 7/4/2011 05:59:01 | 22.734 |
| 7/9/2011 18:39:01 | 19.968 | 7/4/2011 06:39:01 | 22.671 |
| 7/9/2011 19:19:01 | 18.779 | 7/4/2011 07:19:01 | 22.671 |
| 7/9/2011 19:59:01 | 18.341 | 7/4/2011 07:59:01 | 22.609 |
| 7/9/2011 20:39:01 | 18.215 | 7/4/2011 08:39:01 | 22.609 |
| 7/9/2011 21:19:01 | 17.965 | 7/4/2011 09:19:01 | 22.546 |
| 7/9/2011 21:59:01 | 18.341 | 7/4/2011 09:59:01 | 22.546 |
| 7/9/2011 22:39:01 | 19.155 | 7/4/2011 10:39:01 | 22.483 |
| 7/9/2011 23:19:01 | 18.654 | 7/4/2011 11:19:01 | 22.483 |



|                    |        |                   |        |
|--------------------|--------|-------------------|--------|
| 7/9/2011 23:59:01  | 18.466 | 7/4/2011 11:59:01 | 22.483 |
| 7/10/2011 00:39:01 | 17.902 | 7/4/2011 12:39:01 | 22.421 |
| 7/10/2011 01:19:01 | 16.837 | 7/4/2011 13:19:01 | 22.421 |
| 7/10/2011 01:59:01 | 16.086 | 7/4/2011 13:59:01 | 22.421 |
| 7/10/2011 02:39:01 | 15.960 | 7/4/2011 14:39:01 | 22.483 |
| 7/10/2011 03:19:01 | 17.213 | 7/4/2011 15:19:01 | 22.483 |
| 7/10/2011 03:59:01 | 18.716 | 7/4/2011 15:59:01 | 22.483 |
| 7/10/2011 04:39:01 | 19.781 | 7/4/2011 16:39:01 | 22.546 |
| 7/10/2011 05:19:01 | 19.468 | 7/4/2011 17:19:01 | 22.546 |
| 7/10/2011 05:59:01 | 19.217 | 7/4/2011 17:59:01 | 22.609 |
| 7/10/2011 06:39:01 | 19.217 | 7/4/2011 18:39:01 | 22.609 |
| 7/10/2011 07:19:01 | 19.843 | 7/4/2011 19:19:01 | 22.609 |
| 7/10/2011 07:59:01 | 21.470 | 7/4/2011 19:59:01 | 22.671 |
| 7/10/2011 08:39:01 | 22.971 | 7/4/2011 20:39:01 | 22.671 |
| 7/10/2011 09:19:01 | 24.472 | 7/4/2011 21:19:01 | 22.671 |
| 7/10/2011 09:59:01 | 26.284 | 7/4/2011 21:59:01 | 22.671 |
| 7/10/2011 10:39:01 | 28.220 | 7/4/2011 22:39:01 | 22.671 |
| 7/10/2011 11:19:01 | 28.907 | 7/4/2011 23:19:01 | 22.671 |
| 7/10/2011 11:59:01 | 29.593 | 7/4/2011 23:59:01 | 22.671 |
| 7/10/2011 12:39:01 | 29.968 | 7/5/2011 00:39:01 | 22.671 |
| 7/10/2011 13:19:01 | 30.280 | 7/5/2011 01:19:01 | 22.671 |
| 7/10/2011 13:59:01 | 30.592 | 7/5/2011 01:59:01 | 22.609 |
| 7/10/2011 14:39:01 | 30.529 | 7/5/2011 02:39:01 | 22.609 |
| 7/10/2011 15:19:01 | 30.779 | 7/5/2011 03:19:01 | 22.609 |
| 7/10/2011 15:59:01 | 29.406 | 7/5/2011 03:59:01 | 22.546 |
| 7/10/2011 16:39:01 | 28.470 | 7/5/2011 04:39:01 | 22.546 |
| 7/10/2011 17:19:01 | 27.034 | 7/5/2011 05:19:01 | 22.546 |
| 7/10/2011 17:59:01 | 25.347 | 7/5/2011 05:59:01 | 22.483 |
| 7/10/2011 18:39:01 | 24.222 | 7/5/2011 06:39:01 | 22.483 |
| 7/10/2011 19:19:01 | 23.159 | 7/5/2011 07:19:01 | 22.421 |
| 7/10/2011 19:59:01 | 21.971 | 7/5/2011 07:59:01 | 22.421 |
| 7/10/2011 20:39:01 | 21.032 | 7/5/2011 08:39:01 | 22.358 |
| 7/10/2011 21:19:01 | 21.220 | 7/5/2011 09:19:01 | 22.358 |
| 7/10/2011 21:59:01 | 19.593 | 7/5/2011 09:59:01 | 22.358 |
| 7/10/2011 22:39:01 | 19.092 | 7/5/2011 10:39:01 | 22.296 |
| 7/10/2011 23:19:01 | 18.904 | 7/5/2011 11:19:01 | 22.296 |
| 7/10/2011 23:59:01 | 18.779 | 7/5/2011 11:59:01 | 22.296 |
| 7/11/2011 00:39:01 | 18.466 | 7/5/2011 12:39:01 | 22.296 |
| 7/11/2011 01:19:01 | 19.718 | 7/5/2011 13:19:01 | 22.296 |
| 7/11/2011 01:59:01 | 19.155 | 7/5/2011 13:59:01 | 22.296 |
| 7/11/2011 02:39:01 | 18.842 | 7/5/2011 14:39:01 | 22.358 |
| 7/11/2011 03:19:01 | 18.654 | 7/5/2011 15:19:01 | 22.358 |
| 7/11/2011 03:59:01 | 18.466 | 7/5/2011 15:59:01 | 22.421 |
| 7/11/2011 04:39:01 | 19.468 | 7/5/2011 16:39:01 | 22.421 |
| 7/11/2011 05:19:01 | 20.907 | 7/5/2011 17:19:01 | 22.483 |
| 7/11/2011 05:59:01 | 20.970 | 7/5/2011 17:59:01 | 22.483 |
| 7/11/2011 06:39:01 | 20.907 | 7/5/2011 18:39:01 | 22.546 |
| 7/11/2011 07:19:01 | 21.283 | 7/5/2011 19:19:01 | 22.546 |
| 7/11/2011 07:59:01 | 22.346 | 7/5/2011 19:59:01 | 22.609 |
| 7/11/2011 08:39:01 | 23.534 | 7/5/2011 20:39:01 | 22.609 |

|                    |        |                   |        |
|--------------------|--------|-------------------|--------|
| 7/11/2011 09:19:01 | 24.909 | 7/5/2011 21:19:01 | 22.671 |
| 7/11/2011 09:59:01 | 26.347 | 7/5/2011 21:59:01 | 22.671 |
| 7/11/2011 10:39:01 | 27.783 | 7/5/2011 22:39:01 | 22.734 |
| 7/11/2011 11:19:01 | 28.720 | 7/5/2011 23:19:01 | 22.734 |
| 7/11/2011 11:59:01 | 28.844 | 7/5/2011 23:59:01 | 22.734 |
| 7/11/2011 12:39:01 | 29.406 | 7/6/2011 00:39:01 | 22.734 |
| 7/11/2011 13:19:01 | 29.531 | 7/6/2011 01:19:01 | 22.734 |
| 7/11/2011 13:59:01 | 29.718 | 7/6/2011 01:59:01 | 22.734 |
| 7/11/2011 14:39:01 | 29.469 | 7/6/2011 02:39:01 | 22.734 |
| 7/11/2011 15:19:01 | 29.094 | 7/6/2011 03:19:01 | 22.734 |
| 7/11/2011 15:59:01 | 28.158 | 7/6/2011 03:59:01 | 22.734 |
| 7/11/2011 16:39:01 | 27.096 | 7/6/2011 04:39:01 | 22.734 |
| 7/11/2011 17:19:01 | 25.659 | 7/6/2011 05:19:01 | 22.734 |
| 7/11/2011 17:59:01 | 24.472 | 7/6/2011 05:59:01 | 22.734 |
| 7/11/2011 18:39:01 | 23.784 | 7/6/2011 06:39:01 | 22.734 |
| 7/11/2011 19:19:01 | 23.034 | 7/6/2011 07:19:01 | 22.734 |
| 7/11/2011 19:59:01 | 22.471 | 7/6/2011 07:59:01 | 22.734 |
| 7/11/2011 20:39:01 | 21.721 | 7/6/2011 08:39:01 | 22.671 |
| 7/11/2011 21:19:01 | 21.095 | 7/6/2011 09:19:01 | 22.671 |
| 7/11/2011 21:59:01 | 20.469 | 7/6/2011 09:59:01 | 22.671 |
| 7/11/2011 22:39:01 | 19.656 | 7/6/2011 10:39:01 | 22.671 |
| 7/11/2011 23:19:01 | 18.842 | 7/6/2011 11:19:01 | 22.609 |
| 7/11/2011 23:59:01 | 19.468 | 7/6/2011 11:59:01 | 22.609 |
| 7/12/2011 00:39:01 | 19.530 | 7/6/2011 12:39:01 | 22.609 |
| 7/12/2011 01:19:01 | 19.843 | 7/6/2011 13:19:01 | 22.609 |
| 7/12/2011 01:59:01 | 19.280 | 7/6/2011 13:59:01 | 22.671 |
| 7/12/2011 02:39:01 | 18.904 | 7/6/2011 14:39:01 | 22.671 |
| 7/12/2011 03:19:01 | 18.904 | 7/6/2011 15:19:01 | 22.671 |
| 7/12/2011 03:59:01 | 18.153 | 7/6/2011 15:59:01 | 22.734 |
| 7/12/2011 04:39:01 | 17.902 | 7/6/2011 16:39:01 | 22.734 |
| 7/12/2011 05:19:01 | 17.777 | 7/6/2011 17:19:01 | 22.734 |
| 7/12/2011 05:59:01 | 17.464 | 7/6/2011 17:59:01 | 22.796 |
| 7/12/2011 06:39:01 | 18.654 | 7/6/2011 18:39:01 | 22.796 |
| 7/12/2011 07:19:01 | 19.155 | 7/6/2011 19:19:01 | 22.796 |
| 7/12/2011 07:59:01 | 20.657 | 7/6/2011 19:59:01 | 22.859 |
| 7/12/2011 08:39:01 | 22.471 | 7/6/2011 20:39:01 | 22.859 |
| 7/12/2011 09:19:01 | 24.472 | 7/6/2011 21:19:01 | 22.859 |
| 7/12/2011 09:59:01 | 26.159 | 7/6/2011 21:59:01 | 22.921 |
| 7/12/2011 10:39:01 | 28.220 | 7/6/2011 22:39:01 | 22.921 |
| 7/12/2011 11:19:01 | 29.032 | 7/6/2011 23:19:01 | 22.921 |
| 7/12/2011 11:59:01 | 29.032 | 7/6/2011 23:59:01 | 22.921 |
| 7/12/2011 12:39:01 | 29.469 | 7/7/2011 00:39:01 | 22.921 |
| 7/12/2011 13:19:01 | 29.593 | 7/7/2011 01:19:01 | 22.921 |
| 7/12/2011 13:59:01 | 29.968 | 7/7/2011 01:59:01 | 22.921 |
| 7/12/2011 14:39:01 | 30.093 | 7/7/2011 02:39:01 | 22.921 |
| 7/12/2011 15:19:01 | 29.593 | 7/7/2011 03:19:01 | 22.859 |
| 7/12/2011 15:59:01 | 28.657 | 7/7/2011 03:59:01 | 22.859 |
| 7/12/2011 16:39:01 | 27.283 | 7/7/2011 04:39:01 | 22.859 |
| 7/12/2011 17:19:01 | 26.034 | 7/7/2011 05:19:01 | 22.859 |
| 7/12/2011 17:59:01 | 24.534 | 7/7/2011 05:59:01 | 22.796 |

|                    |        |                   |        |
|--------------------|--------|-------------------|--------|
| 7/12/2011 18:39:01 | 23.847 | 7/7/2011 06:39:01 | 22.796 |
| 7/12/2011 19:19:01 | 23.284 | 7/7/2011 07:19:01 | 22.796 |
| 7/12/2011 19:59:01 | 22.596 | 7/7/2011 07:59:01 | 22.734 |
| 7/12/2011 20:39:01 | 21.721 | 7/7/2011 08:39:01 | 22.734 |
| 7/12/2011 21:19:01 | 21.220 | 7/7/2011 09:19:01 | 22.734 |
| 7/12/2011 21:59:01 | 20.719 | 7/7/2011 09:59:01 | 22.671 |
| 7/12/2011 22:39:01 | 20.344 | 7/7/2011 10:39:01 | 22.671 |
| 7/12/2011 23:19:01 | 19.593 | 7/7/2011 11:19:01 | 22.609 |
| 7/12/2011 23:59:01 | 19.155 | 7/7/2011 11:59:01 | 22.609 |
| 7/13/2011 00:39:01 | 18.466 | 7/7/2011 12:39:01 | 22.609 |
| 7/13/2011 01:19:01 | 18.215 | 7/7/2011 13:19:01 | 22.609 |
| 7/13/2011 01:59:01 | 17.151 | 7/7/2011 13:59:01 | 22.609 |
| 7/13/2011 02:39:01 | 16.524 | 7/7/2011 14:39:01 | 22.609 |
| 7/13/2011 03:19:01 | 16.399 | 7/7/2011 15:19:01 | 22.671 |
| 7/13/2011 03:59:01 | 15.960 | 7/7/2011 15:59:01 | 22.671 |
| 7/13/2011 04:39:01 | 15.145 | 7/7/2011 16:39:01 | 22.671 |
| 7/13/2011 05:19:01 | 13.766 | 7/7/2011 17:19:01 | 22.671 |
| 7/13/2011 05:59:01 | 13.515 | 7/7/2011 17:59:01 | 22.734 |
| 7/13/2011 06:39:01 | 14.268 | 7/7/2011 18:39:01 | 22.734 |
| 7/13/2011 07:19:01 | 16.649 | 7/7/2011 19:19:01 | 22.734 |
| 7/13/2011 07:59:01 | 19.405 | 7/7/2011 19:59:01 | 22.734 |
| 7/13/2011 08:39:01 | 22.221 | 7/7/2011 20:39:01 | 22.796 |
| 7/13/2011 09:19:01 | 23.972 | 7/7/2011 21:19:01 | 22.796 |
| 7/13/2011 09:59:01 | 25.597 | 7/7/2011 21:59:01 | 22.796 |
| 7/13/2011 10:39:01 | 27.658 | 7/7/2011 22:39:01 | 22.796 |
| 7/13/2011 11:19:01 | 28.407 | 7/7/2011 23:19:01 | 22.734 |
| 7/13/2011 11:59:01 | 28.657 | 7/7/2011 23:59:01 | 22.734 |
| 7/13/2011 12:39:01 | 29.344 | 7/8/2011 00:39:01 | 22.734 |
| 7/13/2011 13:19:01 | 29.718 | 7/8/2011 01:19:01 | 22.734 |
| 7/13/2011 13:59:01 | 29.781 | 7/8/2011 01:59:01 | 22.671 |
| 7/13/2011 14:39:01 | 30.030 | 7/8/2011 02:39:01 | 22.671 |
| 7/13/2011 15:19:01 | 29.469 | 7/8/2011 03:19:01 | 22.671 |
| 7/13/2011 15:59:01 | 28.158 | 7/8/2011 03:59:01 | 22.609 |
| 7/13/2011 16:39:01 | 26.721 | 7/8/2011 04:39:01 | 22.609 |
| 7/13/2011 17:19:01 | 24.722 | 7/8/2011 05:19:01 | 22.546 |
| 7/13/2011 17:59:01 | 22.284 | 7/8/2011 05:59:01 | 22.546 |
| 7/13/2011 18:39:01 | 20.845 | 7/8/2011 06:39:01 | 22.483 |
| 7/13/2011 19:19:01 | 20.532 | 7/8/2011 07:19:01 | 22.483 |
| 7/13/2011 19:59:01 | 19.718 | 7/8/2011 07:59:01 | 22.421 |
| 7/13/2011 20:39:01 | 19.092 | 7/8/2011 08:39:01 | 22.421 |
| 7/13/2011 21:19:01 | 19.217 | 7/8/2011 09:19:01 | 22.358 |
| 7/13/2011 21:59:01 | 19.468 | 7/8/2011 09:59:01 | 22.358 |
| 7/13/2011 22:39:01 | 20.344 | 7/8/2011 10:39:01 | 22.358 |
| 7/13/2011 23:19:01 | 20.594 | 7/8/2011 11:19:01 | 22.296 |
| 7/13/2011 23:59:01 | 20.344 | 7/8/2011 11:59:01 | 22.296 |
| 7/14/2011 00:39:01 | 19.968 | 7/8/2011 12:39:01 | 22.296 |
| 7/14/2011 01:19:01 | 19.656 | 7/8/2011 13:19:01 | 22.296 |
| 7/14/2011 01:59:01 | 19.530 | 7/8/2011 13:59:01 | 22.296 |
| 7/14/2011 02:39:01 | 19.593 | 7/8/2011 14:39:01 | 22.296 |
| 7/14/2011 03:19:01 | 19.155 | 7/8/2011 15:19:01 | 22.358 |

|                    |        |                    |        |
|--------------------|--------|--------------------|--------|
| 7/14/2011 03:59:01 | 18.716 | 7/8/2011 15:59:01  | 22.358 |
| 7/14/2011 04:39:01 | 18.278 | 7/8/2011 16:39:01  | 22.358 |
| 7/14/2011 05:19:01 | 17.902 | 7/8/2011 17:19:01  | 22.421 |
| 7/14/2011 05:59:01 | 17.151 | 7/8/2011 17:59:01  | 22.421 |
| 7/14/2011 06:39:01 | 16.274 | 7/8/2011 18:39:01  | 22.483 |
| 7/14/2011 07:19:01 | 17.464 | 7/8/2011 19:19:01  | 22.483 |
| 7/14/2011 07:59:01 | 20.031 | 7/8/2011 19:59:01  | 22.483 |
| 7/14/2011 08:39:01 | 22.221 | 7/8/2011 20:39:01  | 22.546 |
| 7/14/2011 09:19:01 | 24.034 | 7/8/2011 21:19:01  | 22.546 |
| 7/14/2011 09:59:01 | 25.409 | 7/8/2011 21:59:01  | 22.546 |
| 7/14/2011 10:39:01 | 28.407 | 7/8/2011 22:39:01  | 22.546 |
| 7/14/2011 11:19:01 | 28.595 | 7/8/2011 23:19:01  | 22.546 |
| 7/14/2011 11:59:01 | 28.969 | 7/8/2011 23:59:01  | 22.546 |
| 7/14/2011 12:39:01 | 29.656 | 7/9/2011 00:39:01  | 22.546 |
| 7/14/2011 13:19:01 | 29.843 | 7/9/2011 01:19:01  | 22.546 |
| 7/14/2011 13:59:01 | 30.280 | 7/9/2011 01:59:01  | 22.483 |
| 7/14/2011 14:39:01 | 30.342 | 7/9/2011 02:39:01  | 22.483 |
| 7/14/2011 15:19:01 | 29.905 | 7/9/2011 03:19:01  | 22.483 |
| 7/14/2011 15:59:01 | 29.032 | 7/9/2011 03:59:01  | 22.483 |
| 7/14/2011 16:39:01 | 26.909 | 7/9/2011 04:39:01  | 22.421 |
| 7/14/2011 17:19:01 | 23.972 | 7/9/2011 05:19:01  | 22.421 |
| 7/14/2011 17:59:01 | 21.533 | 7/9/2011 05:59:01  | 22.421 |
| 7/14/2011 18:39:01 | 19.530 | 7/9/2011 06:39:01  | 22.421 |
| 7/14/2011 19:19:01 | 18.090 | 7/9/2011 07:19:01  | 22.358 |
| 7/14/2011 19:59:01 | 17.151 | 7/9/2011 07:59:01  | 22.358 |
| 7/14/2011 20:39:01 | 16.712 | 7/9/2011 08:39:01  | 22.358 |
| 7/14/2011 21:19:01 | 16.023 | 7/9/2011 09:19:01  | 22.358 |
| 7/14/2011 21:59:01 | 15.647 | 7/9/2011 09:59:01  | 22.296 |
| 7/14/2011 22:39:01 | 15.083 | 7/9/2011 10:39:01  | 22.296 |
| 7/14/2011 23:19:01 | 14.895 | 7/9/2011 11:19:01  | 22.296 |
| 7/14/2011 23:59:01 | 16.274 | 7/9/2011 11:59:01  | 22.296 |
| 7/15/2011 00:39:01 | 18.153 | 7/9/2011 12:39:01  | 22.296 |
| 7/15/2011 01:19:01 | 18.215 | 7/9/2011 13:19:01  | 22.296 |
| 7/15/2011 01:59:01 | 17.652 | 7/9/2011 13:59:01  | 22.296 |
| 7/15/2011 02:39:01 | 16.900 | 7/9/2011 14:39:01  | 22.358 |
| 7/15/2011 03:19:01 | 16.211 | 7/9/2011 15:19:01  | 22.358 |
| 7/15/2011 03:59:01 | 15.710 | 7/9/2011 15:59:01  | 22.358 |
| 7/15/2011 04:39:01 | 15.835 | 7/9/2011 16:39:01  | 22.421 |
| 7/15/2011 05:19:01 | 15.960 | 7/9/2011 17:19:01  | 22.421 |
| 7/15/2011 05:59:01 | 15.647 | 7/9/2011 17:59:01  | 22.483 |
| 7/15/2011 06:39:01 | 15.522 | 7/9/2011 18:39:01  | 22.483 |
| 7/15/2011 07:19:01 | 16.336 | 7/9/2011 19:19:01  | 22.483 |
| 7/15/2011 07:59:01 | 18.466 | 7/9/2011 19:59:01  | 22.546 |
| 7/15/2011 08:39:01 | 22.221 | 7/9/2011 20:39:01  | 22.546 |
| 7/15/2011 09:19:01 | 24.847 | 7/9/2011 21:19:01  | 22.546 |
| 7/15/2011 09:59:01 | 26.784 | 7/9/2011 21:59:01  | 22.609 |
| 7/15/2011 10:39:01 | 28.033 | 7/9/2011 22:39:01  | 22.609 |
| 7/15/2011 11:19:01 | 27.721 | 7/9/2011 23:19:01  | 22.609 |
| 7/15/2011 11:59:01 | 28.220 | 7/9/2011 23:59:01  | 22.609 |
| 7/15/2011 12:39:01 | 28.532 | 7/10/2011 00:39:01 | 22.609 |

|                    |        |                    |        |
|--------------------|--------|--------------------|--------|
| 7/15/2011 13:19:01 | 28.033 | 7/10/2011 01:19:01 | 22.609 |
| 7/15/2011 13:59:01 | 28.345 | 7/10/2011 01:59:01 | 22.546 |
| 7/15/2011 14:39:01 | 28.907 | 7/10/2011 02:39:01 | 22.546 |
| 7/15/2011 15:19:01 | 28.470 | 7/10/2011 03:19:01 | 22.546 |
| 7/15/2011 15:59:01 | 27.721 | 7/10/2011 03:59:01 | 22.546 |
| 7/15/2011 16:39:01 | 26.659 | 7/10/2011 04:39:01 | 22.546 |
| 7/15/2011 17:19:01 | 25.159 | 7/10/2011 05:19:01 | 22.483 |
| 7/15/2011 17:59:01 | 23.909 | 7/10/2011 05:59:01 | 22.483 |
| 7/15/2011 18:39:01 | 22.846 | 7/10/2011 06:39:01 | 22.483 |
| 7/15/2011 19:19:01 | 22.346 | 7/10/2011 07:19:01 | 22.483 |
| 7/15/2011 19:59:01 | 21.783 | 7/10/2011 07:59:01 | 22.483 |
| 7/15/2011 20:39:01 | 22.346 | 7/10/2011 08:39:01 | 22.421 |
| 7/15/2011 21:19:01 | 22.596 | 7/10/2011 09:19:01 | 22.421 |
| 7/15/2011 21:59:01 | 22.784 | 7/10/2011 09:59:01 | 22.421 |
| 7/15/2011 22:39:01 | 23.347 | 7/10/2011 10:39:01 | 22.421 |
| 7/15/2011 23:19:01 | 23.034 | 7/10/2011 11:19:01 | 22.421 |
| 7/15/2011 23:59:01 | 22.409 | 7/10/2011 11:59:01 | 22.358 |
| 7/16/2011 00:39:01 | 21.470 | 7/10/2011 12:39:01 | 22.358 |
| 7/16/2011 01:19:01 | 19.530 | 7/10/2011 13:19:01 | 22.421 |
| 7/16/2011 01:59:01 | 18.278 | 7/10/2011 13:59:01 | 22.421 |
| 7/16/2011 02:39:01 | 17.652 | 7/10/2011 14:39:01 | 22.421 |
| 7/16/2011 03:19:01 | 17.401 | 7/10/2011 15:19:01 | 22.421 |
| 7/16/2011 03:59:01 | 16.963 | 7/10/2011 15:59:01 | 22.483 |
| 7/16/2011 04:39:01 | 17.088 | 7/10/2011 16:39:01 | 22.483 |
| 7/16/2011 05:19:01 | 17.714 | 7/10/2011 17:19:01 | 22.483 |
| 7/16/2011 05:59:01 | 17.527 | 7/10/2011 17:59:01 | 22.546 |
| 7/16/2011 06:39:01 | 17.151 | 7/10/2011 18:39:01 | 22.546 |
| 7/16/2011 07:19:01 | 17.777 | 7/10/2011 19:19:01 | 22.546 |
| 7/16/2011 07:59:01 | 19.906 | 7/10/2011 19:59:01 | 22.609 |
| 7/16/2011 08:39:01 | 22.534 | 7/10/2011 20:39:01 | 22.609 |
| 7/16/2011 09:19:01 | 24.784 | 7/10/2011 21:19:01 | 22.609 |
| 7/16/2011 09:59:01 | 26.472 | 7/10/2011 21:59:01 | 22.671 |
| 7/16/2011 10:39:01 | 29.032 | 7/10/2011 22:39:01 | 22.671 |
| 7/16/2011 11:19:01 | 29.157 | 7/10/2011 23:19:01 | 22.671 |
| 7/16/2011 11:59:01 | 29.781 | 7/10/2011 23:59:01 | 22.671 |
| 7/16/2011 12:39:01 | 30.280 | 7/11/2011 00:39:01 | 22.671 |
| 7/16/2011 13:19:01 | 30.280 | 7/11/2011 01:19:01 | 22.671 |
| 7/16/2011 13:59:01 | 30.654 | 7/11/2011 01:59:01 | 22.671 |
| 7/16/2011 14:39:01 | 30.529 | 7/11/2011 02:39:01 | 22.671 |
| 7/16/2011 15:19:01 | 30.217 | 7/11/2011 03:19:01 | 22.671 |
| 7/16/2011 15:59:01 | 29.094 | 7/11/2011 03:59:01 | 22.671 |
| 7/16/2011 16:39:01 | 27.408 | 7/11/2011 04:39:01 | 22.609 |
| 7/16/2011 17:19:01 | 25.347 | 7/11/2011 05:19:01 | 22.609 |
| 7/16/2011 17:59:01 | 22.846 | 7/11/2011 05:59:01 | 22.609 |
| 7/16/2011 18:39:01 | 21.283 | 7/11/2011 06:39:01 | 22.609 |
| 7/16/2011 19:19:01 | 20.407 | 7/11/2011 07:19:01 | 22.609 |
| 7/16/2011 19:59:01 | 19.593 | 7/11/2011 07:59:01 | 22.546 |
| 7/16/2011 20:39:01 | 19.280 | 7/11/2011 08:39:01 | 22.546 |
| 7/16/2011 21:19:01 | 20.219 | 7/11/2011 09:19:01 | 22.546 |
| 7/16/2011 21:59:01 | 20.719 | 7/11/2011 09:59:01 | 22.546 |

|                    |        |                    |        |
|--------------------|--------|--------------------|--------|
| 7/16/2011 22:39:01 | 20.219 | 7/11/2011 10:39:01 | 22.546 |
| 7/16/2011 23:19:01 | 19.593 | 7/11/2011 11:19:01 | 22.546 |
| 7/16/2011 23:59:01 | 19.092 | 7/11/2011 11:59:01 | 22.546 |
| 7/17/2011 00:39:01 | 20.156 | 7/11/2011 12:39:01 | 22.483 |
| 7/17/2011 01:19:01 | 19.843 | 7/11/2011 13:19:01 | 22.546 |
| 7/17/2011 01:59:01 | 19.468 | 7/11/2011 13:59:01 | 22.546 |
| 7/17/2011 02:39:01 | 19.092 | 7/11/2011 14:39:01 | 22.546 |
| 7/17/2011 03:19:01 | 18.842 | 7/11/2011 15:19:01 | 22.546 |
| 7/17/2011 03:59:01 | 18.842 | 7/11/2011 15:59:01 | 22.609 |
| 7/17/2011 04:39:01 | 17.902 | 7/11/2011 16:39:01 | 22.609 |
| 7/17/2011 05:19:01 | 17.151 | 7/11/2011 17:19:01 | 22.609 |
| 7/17/2011 05:59:01 | 16.336 | 7/11/2011 17:59:01 | 22.609 |
| 7/17/2011 06:39:01 | 16.023 | 7/11/2011 18:39:01 | 22.671 |
| 7/17/2011 07:19:01 | 16.399 | 7/11/2011 19:19:01 | 22.671 |
| 7/17/2011 07:59:01 | 18.716 | 7/11/2011 19:59:01 | 22.671 |
| 7/17/2011 08:39:01 | 21.783 | 7/11/2011 20:39:01 | 22.734 |
| 7/17/2011 09:19:01 | 24.722 | 7/11/2011 21:19:01 | 22.734 |
| 7/17/2011 09:59:01 | 26.846 | 7/11/2011 21:59:01 | 22.734 |
| 7/17/2011 10:39:01 | 28.470 | 7/11/2011 22:39:01 | 22.734 |
| 7/17/2011 11:19:01 | 29.781 | 7/11/2011 23:19:01 | 22.734 |
| 7/17/2011 11:59:01 | 29.843 | 7/11/2011 23:59:01 | 22.734 |
| 7/17/2011 12:39:01 | 30.904 | 7/12/2011 00:39:01 | 22.734 |
| 7/17/2011 13:19:01 | 31.091 | 7/12/2011 01:19:01 | 22.734 |
| 7/17/2011 13:59:01 | 31.340 | 7/12/2011 01:59:01 | 22.734 |
| 7/17/2011 14:39:01 | 31.216 | 7/12/2011 02:39:01 | 22.671 |
| 7/17/2011 15:19:01 | 30.841 | 7/12/2011 03:19:01 | 22.671 |
| 7/17/2011 15:59:01 | 29.157 | 7/12/2011 03:59:01 | 22.671 |
| 7/17/2011 16:39:01 | 26.721 | 7/12/2011 04:39:01 | 22.609 |
| 7/17/2011 17:19:01 | 24.347 | 7/12/2011 05:19:01 | 22.609 |
| 7/17/2011 17:59:01 | 22.409 | 7/12/2011 05:59:01 | 22.609 |
| 7/17/2011 18:39:01 | 20.407 | 7/12/2011 06:39:01 | 22.609 |
| 7/17/2011 19:19:01 | 18.967 | 7/12/2011 07:19:01 | 22.546 |
| 7/17/2011 19:59:01 | 17.902 | 7/12/2011 07:59:01 | 22.546 |
| 7/17/2011 20:39:01 | 17.213 | 7/12/2011 08:39:01 | 22.546 |
| 7/17/2011 21:19:01 | 17.088 | 7/12/2011 09:19:01 | 22.483 |
| 7/17/2011 21:59:01 | 17.025 | 7/12/2011 09:59:01 | 22.483 |
| 7/17/2011 22:39:01 | 16.587 | 7/12/2011 10:39:01 | 22.483 |
| 7/17/2011 23:19:01 | 16.336 | 7/12/2011 11:19:01 | 22.421 |
| 7/17/2011 23:59:01 | 16.336 | 7/12/2011 11:59:01 | 22.421 |
| 7/18/2011 00:39:01 | 16.274 | 7/12/2011 12:39:01 | 22.421 |
| 7/18/2011 01:19:01 | 16.086 | 7/12/2011 13:19:01 | 22.421 |
| 7/18/2011 01:59:01 | 15.710 | 7/12/2011 13:59:01 | 22.421 |
| 7/18/2011 02:39:01 | 15.145 | 7/12/2011 14:39:01 | 22.421 |
| 7/18/2011 03:19:01 | 15.396 | 7/12/2011 15:19:01 | 22.483 |
| 7/18/2011 03:59:01 | 15.208 | 7/12/2011 15:59:01 | 22.483 |
| 7/18/2011 04:39:01 | 15.459 | 7/12/2011 16:39:01 | 22.483 |
| 7/18/2011 05:19:01 | 14.895 | 7/12/2011 17:19:01 | 22.483 |
| 7/18/2011 05:59:01 | 14.393 | 7/12/2011 17:59:01 | 22.546 |
| 7/18/2011 06:39:01 | 14.268 | 7/12/2011 18:39:01 | 22.546 |
| 7/18/2011 07:19:01 | 14.957 | 7/12/2011 19:19:01 | 22.546 |

|                    |        |                    |        |
|--------------------|--------|--------------------|--------|
| 7/18/2011 07:59:01 | 17.025 | 7/12/2011 19:59:01 | 22.609 |
| 7/18/2011 08:39:01 | 20.344 | 7/12/2011 20:39:01 | 22.609 |
| 7/18/2011 09:19:01 | 23.847 | 7/12/2011 21:19:01 | 22.609 |
| 7/18/2011 09:59:01 | 26.659 | 7/12/2011 21:59:01 | 22.609 |
| 7/18/2011 10:39:01 | 29.094 | 7/12/2011 22:39:01 | 22.609 |
| 7/18/2011 11:19:01 | 30.342 | 7/12/2011 23:19:01 | 22.609 |
| 7/18/2011 11:59:01 | 30.966 | 7/12/2011 23:59:01 | 22.671 |
| 7/18/2011 12:39:01 | 31.715 | 7/13/2011 00:39:01 | 22.671 |
| 7/18/2011 13:19:01 | 32.089 | 7/13/2011 01:19:01 | 22.671 |
| 7/18/2011 13:59:01 | 31.403 | 7/13/2011 01:59:01 | 22.609 |
| 7/18/2011 14:39:01 | 31.964 | 7/13/2011 02:39:01 | 22.609 |
| 7/18/2011 15:19:01 | 31.465 | 7/13/2011 03:19:01 | 22.609 |
| 7/18/2011 15:59:01 | 30.467 | 7/13/2011 03:59:01 | 22.609 |
| 7/18/2011 16:39:01 | 28.907 | 7/13/2011 04:39:01 | 22.609 |
| 7/18/2011 17:19:01 | 25.222 | 7/13/2011 05:19:01 | 22.546 |
| 7/18/2011 17:59:01 | 22.971 | 7/13/2011 05:59:01 | 22.546 |
| 7/18/2011 18:39:01 | 21.095 | 7/13/2011 06:39:01 | 22.483 |
| 7/18/2011 19:19:01 | 19.781 | 7/13/2011 07:19:01 | 22.483 |
| 7/18/2011 19:59:01 | 18.842 | 7/13/2011 07:59:01 | 22.483 |
| 7/18/2011 20:39:01 | 18.403 | 7/13/2011 08:39:01 | 22.421 |
| 7/18/2011 21:19:01 | 18.090 | 7/13/2011 09:19:01 | 22.421 |
| 7/18/2011 21:59:01 | 18.278 | 7/13/2011 09:59:01 | 22.358 |
| 7/18/2011 22:39:01 | 17.464 | 7/13/2011 10:39:01 | 22.358 |
| 7/18/2011 23:19:01 | 16.775 | 7/13/2011 11:19:01 | 22.358 |
| 7/18/2011 23:59:01 | 16.587 | 7/13/2011 11:59:01 | 22.296 |
| 7/19/2011 00:39:01 | 15.898 | 7/13/2011 12:39:01 | 22.296 |
| 7/19/2011 01:19:01 | 15.710 | 7/13/2011 13:19:01 | 22.296 |
| 7/19/2011 01:59:01 | 15.835 | 7/13/2011 13:59:01 | 22.296 |
| 7/19/2011 02:39:01 | 15.835 | 7/13/2011 14:39:01 | 22.296 |
| 7/19/2011 03:19:01 | 16.148 | 7/13/2011 15:19:01 | 22.358 |
| 7/19/2011 03:59:01 | 15.522 | 7/13/2011 15:59:01 | 22.358 |
| 7/19/2011 04:39:01 | 14.644 | 7/13/2011 16:39:01 | 22.358 |
| 7/19/2011 05:19:01 | 14.456 | 7/13/2011 17:19:01 | 22.421 |
| 7/19/2011 05:59:01 | 14.330 | 7/13/2011 17:59:01 | 22.421 |
| 7/19/2011 06:39:01 | 14.142 | 7/13/2011 18:39:01 | 22.421 |
| 7/19/2011 07:19:01 | 14.644 | 7/13/2011 19:19:01 | 22.483 |
| 7/19/2011 07:59:01 | 16.712 | 7/13/2011 19:59:01 | 22.483 |
| 7/19/2011 08:39:01 | 19.968 | 7/13/2011 20:39:01 | 22.483 |
| 7/19/2011 09:19:01 | 23.722 | 7/13/2011 21:19:01 | 22.546 |
| 7/19/2011 09:59:01 | 26.721 | 7/13/2011 21:59:01 | 22.546 |
| 7/19/2011 10:39:01 | 29.157 | 7/13/2011 22:39:01 | 22.546 |
| 7/19/2011 11:19:01 | 30.405 | 7/13/2011 23:19:01 | 22.546 |
| 7/19/2011 11:59:01 | 31.153 | 7/13/2011 23:59:01 | 22.546 |
| 7/19/2011 12:39:01 | 32.213 | 7/14/2011 00:39:01 | 22.546 |
| 7/19/2011 13:19:01 | 32.401 | 7/14/2011 01:19:01 | 22.546 |
| 7/19/2011 13:59:01 | 32.401 | 7/14/2011 01:59:01 | 22.546 |
| 7/19/2011 14:39:01 | 31.091 | 7/14/2011 02:39:01 | 22.483 |
| 7/19/2011 15:19:01 | 31.403 | 7/14/2011 03:19:01 | 22.483 |
| 7/19/2011 15:59:01 | 29.406 | 7/14/2011 03:59:01 | 22.483 |
| 7/19/2011 16:39:01 | 26.909 | 7/14/2011 04:39:01 | 22.483 |

|                    |        |                    |        |
|--------------------|--------|--------------------|--------|
| 7/19/2011 17:19:01 | 24.534 | 7/14/2011 05:19:01 | 22.483 |
| 7/19/2011 17:59:01 | 22.284 | 7/14/2011 05:59:01 | 22.421 |
| 7/19/2011 18:39:01 | 20.156 | 7/14/2011 06:39:01 | 22.421 |
| 7/19/2011 19:19:01 | 18.529 | 7/14/2011 07:19:01 | 22.421 |
| 7/19/2011 19:59:01 | 17.339 | 7/14/2011 07:59:01 | 22.421 |
| 7/19/2011 20:39:01 | 16.649 | 7/14/2011 08:39:01 | 22.358 |
| 7/19/2011 21:19:01 | 16.524 | 7/14/2011 09:19:01 | 22.358 |
| 7/19/2011 21:59:01 | 16.211 | 7/14/2011 09:59:01 | 22.358 |
| 7/19/2011 22:39:01 | 16.086 | 7/14/2011 10:39:01 | 22.358 |
| 7/19/2011 23:19:01 | 15.584 | 7/14/2011 11:19:01 | 22.296 |
| 7/19/2011 23:59:01 | 14.957 | 7/14/2011 11:59:01 | 22.296 |
| 7/20/2011 00:39:01 | 14.456 | 7/14/2011 12:39:01 | 22.296 |
| 7/20/2011 01:19:01 | 14.205 | 7/14/2011 13:19:01 | 22.296 |
| 7/20/2011 01:59:01 | 13.954 | 7/14/2011 13:59:01 | 22.296 |
| 7/20/2011 02:39:01 | 13.703 | 7/14/2011 14:39:01 | 22.358 |
| 7/20/2011 03:19:01 | 13.954 | 7/14/2011 15:19:01 | 22.358 |
| 7/20/2011 03:59:01 | 14.017 | 7/14/2011 15:59:01 | 22.358 |
| 7/20/2011 04:39:01 | 13.766 | 7/14/2011 16:39:01 | 22.421 |
| 7/20/2011 05:19:01 | 13.327 | 7/14/2011 17:19:01 | 22.421 |
| 7/20/2011 05:59:01 | 13.014 | 7/14/2011 17:59:01 | 22.421 |
| 7/20/2011 06:39:01 | 12.888 | 7/14/2011 18:39:01 | 22.483 |
| 7/20/2011 07:19:01 | 13.515 | 7/14/2011 19:19:01 | 22.483 |
| 7/20/2011 07:59:01 | 16.274 | 7/14/2011 19:59:01 | 22.483 |
| 7/20/2011 08:39:01 | 19.530 | 7/14/2011 20:39:01 | 22.483 |
| 7/20/2011 09:19:01 | 23.472 | 7/14/2011 21:19:01 | 22.546 |
| 7/20/2011 09:59:01 | 26.159 | 7/14/2011 21:59:01 | 22.546 |
| 7/20/2011 10:39:01 | 29.032 | 7/14/2011 22:39:01 | 22.546 |
| 7/20/2011 11:19:01 | 30.155 | 7/14/2011 23:19:01 | 22.546 |
| 7/20/2011 11:59:01 | 30.904 | 7/14/2011 23:59:01 | 22.546 |
| 7/20/2011 12:39:01 | 31.777 | 7/15/2011 00:39:01 | 22.483 |
| 7/20/2011 13:19:01 | 32.026 | 7/15/2011 01:19:01 | 22.483 |
| 7/20/2011 13:59:01 | 32.276 | 7/15/2011 01:59:01 | 22.483 |
| 7/20/2011 14:39:01 | 31.964 | 7/15/2011 02:39:01 | 22.483 |
| 7/20/2011 15:19:01 | 31.590 | 7/15/2011 03:19:01 | 22.483 |
| 7/20/2011 15:59:01 | 29.281 | 7/15/2011 03:59:01 | 22.421 |
| 7/20/2011 16:39:01 | 27.471 | 7/15/2011 04:39:01 | 22.421 |
| 7/20/2011 17:19:01 | 25.659 | 7/15/2011 05:19:01 | 22.421 |
| 7/20/2011 17:59:01 | 23.722 | 7/15/2011 05:59:01 | 22.358 |
| 7/20/2011 18:39:01 | 21.283 | 7/15/2011 06:39:01 | 22.358 |
| 7/20/2011 19:19:01 | 19.843 | 7/15/2011 07:19:01 | 22.358 |
| 7/20/2011 19:59:01 | 19.029 | 7/15/2011 07:59:01 | 22.358 |
| 7/20/2011 20:39:01 | 18.779 | 7/15/2011 08:39:01 | 22.358 |
| 7/20/2011 21:19:01 | 18.967 | 7/15/2011 09:19:01 | 22.296 |
| 7/20/2011 21:59:01 | 20.532 | 7/15/2011 09:59:01 | 22.296 |
| 7/20/2011 22:39:01 | 19.968 | 7/15/2011 10:39:01 | 22.296 |
| 7/20/2011 23:19:01 | 19.343 | 7/15/2011 11:19:01 | 22.296 |
| 7/20/2011 23:59:01 | 19.029 | 7/15/2011 11:59:01 | 22.296 |
| 7/21/2011 00:39:01 | 18.654 | 7/15/2011 12:39:01 | 22.296 |
| 7/21/2011 01:19:01 | 18.153 | 7/15/2011 13:19:01 | 22.296 |
| 7/21/2011 01:59:01 | 18.215 | 7/15/2011 13:59:01 | 22.296 |



|                    |        |                    |        |
|--------------------|--------|--------------------|--------|
| 7/21/2011 02:39:01 | 17.464 | 7/15/2011 14:39:01 | 22.358 |
| 7/21/2011 03:19:01 | 16.649 | 7/15/2011 15:19:01 | 22.358 |
| 7/21/2011 03:59:01 | 16.336 | 7/15/2011 15:59:01 | 22.358 |
| 7/21/2011 04:39:01 | 16.148 | 7/15/2011 16:39:01 | 22.421 |
| 7/21/2011 05:19:01 | 16.086 | 7/15/2011 17:19:01 | 22.483 |
| 7/21/2011 05:59:01 | 15.647 | 7/15/2011 17:59:01 | 22.483 |
| 7/21/2011 06:39:01 | 15.083 | 7/15/2011 18:39:01 | 22.546 |
| 7/21/2011 07:19:01 | 15.772 | 7/15/2011 19:19:01 | 22.546 |
| 7/21/2011 07:59:01 | 19.343 | 7/15/2011 19:59:01 | 22.546 |
| 7/21/2011 08:39:01 | 23.284 | 7/15/2011 20:39:01 | 22.609 |
| 7/21/2011 09:19:01 | 25.659 | 7/15/2011 21:19:01 | 22.609 |
| 7/21/2011 09:59:01 | 27.721 | 7/15/2011 21:59:01 | 22.671 |
| 7/21/2011 10:39:01 | 29.656 | 7/15/2011 22:39:01 | 22.671 |
| 7/21/2011 11:19:01 | 30.592 | 7/15/2011 23:19:01 | 22.671 |
| 7/21/2011 11:59:01 | 31.278 | 7/15/2011 23:59:01 | 22.734 |
| 7/21/2011 12:39:01 | 31.715 | 7/16/2011 00:39:01 | 22.734 |
| 7/21/2011 13:19:01 | 31.839 | 7/16/2011 01:19:01 | 22.734 |
| 7/21/2011 13:59:01 | 32.089 | 7/16/2011 01:59:01 | 22.734 |
| 7/21/2011 14:39:01 | 31.964 | 7/16/2011 02:39:01 | 22.734 |
| 7/21/2011 15:19:01 | 31.465 | 7/16/2011 03:19:01 | 22.734 |
| 7/21/2011 15:59:01 | 29.718 | 7/16/2011 03:59:01 | 22.734 |
| 7/21/2011 16:39:01 | 27.283 | 7/16/2011 04:39:01 | 22.734 |
| 7/21/2011 17:19:01 | 24.659 | 7/16/2011 05:19:01 | 22.734 |
| 7/21/2011 17:59:01 | 22.409 | 7/16/2011 05:59:01 | 22.671 |
| 7/21/2011 18:39:01 | 20.407 | 7/16/2011 06:39:01 | 22.671 |
| 7/21/2011 19:19:01 | 19.029 | 7/16/2011 07:19:01 | 22.671 |
| 7/21/2011 19:59:01 | 17.840 | 7/16/2011 07:59:01 | 22.671 |
| 7/21/2011 20:39:01 | 16.963 | 7/16/2011 08:39:01 | 22.671 |
| 7/21/2011 21:19:01 | 16.587 | 7/16/2011 09:19:01 | 22.609 |
| 7/21/2011 21:59:01 | 17.527 | 7/16/2011 09:59:01 | 22.609 |
| 7/21/2011 22:39:01 | 17.840 | 7/16/2011 10:39:01 | 22.609 |
| 7/21/2011 23:19:01 | 17.714 | 7/16/2011 11:19:01 | 22.546 |
| 7/21/2011 23:59:01 | 16.963 | 7/16/2011 11:59:01 | 22.546 |
| 7/22/2011 00:39:01 | 16.524 | 7/16/2011 12:39:01 | 22.546 |
| 7/22/2011 01:19:01 | 16.023 | 7/16/2011 13:19:01 | 22.546 |
| 7/22/2011 01:59:01 | 15.710 | 7/16/2011 13:59:01 | 22.546 |
| 7/22/2011 02:39:01 | 15.271 | 7/16/2011 14:39:01 | 22.546 |
| 7/22/2011 03:19:01 | 15.020 | 7/16/2011 15:19:01 | 22.609 |
| 7/22/2011 03:59:01 | 14.644 | 7/16/2011 15:59:01 | 22.609 |
| 7/22/2011 04:39:01 | 14.268 | 7/16/2011 16:39:01 | 22.609 |
| 7/22/2011 05:19:01 | 13.892 | 7/16/2011 17:19:01 | 22.609 |
| 7/22/2011 05:59:01 | 13.703 | 7/16/2011 17:59:01 | 22.671 |
| 7/22/2011 06:39:01 | 13.954 | 7/16/2011 18:39:01 | 22.671 |
| 7/22/2011 07:19:01 | 14.644 | 7/16/2011 19:19:01 | 22.734 |
| 7/22/2011 07:59:01 | 17.025 | 7/16/2011 19:59:01 | 22.734 |
| 7/22/2011 08:39:01 | 21.032 | 7/16/2011 20:39:01 | 22.734 |
| 7/22/2011 09:19:01 | 25.472 | 7/16/2011 21:19:01 | 22.734 |
| 7/22/2011 09:59:01 | 27.846 | 7/16/2011 21:59:01 | 22.796 |
| 7/22/2011 10:39:01 | 29.718 | 7/16/2011 22:39:01 | 22.796 |
| 7/22/2011 11:19:01 | 31.028 | 7/16/2011 23:19:01 | 22.796 |

|                    |        |                    |        |
|--------------------|--------|--------------------|--------|
| 7/22/2011 11:59:01 | 31.465 | 7/16/2011 23:59:01 | 22.796 |
| 7/22/2011 12:39:01 | 32.026 | 7/17/2011 00:39:01 | 22.796 |
| 7/22/2011 13:19:01 | 32.213 | 7/17/2011 01:19:01 | 22.796 |
| 7/22/2011 13:59:01 | 32.588 | 7/17/2011 01:59:01 | 22.796 |
| 7/22/2011 14:39:01 | 32.026 | 7/17/2011 02:39:01 | 22.796 |
| 7/22/2011 15:19:01 | 31.902 | 7/17/2011 03:19:01 | 22.734 |
| 7/22/2011 15:59:01 | 30.529 | 7/17/2011 03:59:01 | 22.734 |
| 7/22/2011 16:39:01 | 28.844 | 7/17/2011 04:39:01 | 22.734 |
| 7/22/2011 17:19:01 | 26.659 | 7/17/2011 05:19:01 | 22.734 |
| 7/22/2011 17:59:01 | 24.347 | 7/17/2011 05:59:01 | 22.734 |
| 7/22/2011 18:39:01 | 23.097 | 7/17/2011 06:39:01 | 22.734 |
| 7/22/2011 19:19:01 | 22.158 | 7/17/2011 07:19:01 | 22.671 |
| 7/22/2011 19:59:01 | 22.346 | 7/17/2011 07:59:01 | 22.671 |
| 7/22/2011 20:39:01 | 23.034 | 7/17/2011 08:39:01 | 22.671 |
| 7/22/2011 21:19:01 | 23.222 | 7/17/2011 09:19:01 | 22.671 |
| 7/22/2011 21:59:01 | 23.034 | 7/17/2011 09:59:01 | 22.609 |
| 7/22/2011 22:39:01 | 22.409 | 7/17/2011 10:39:01 | 22.609 |
| 7/22/2011 23:19:01 | 21.595 | 7/17/2011 11:19:01 | 22.609 |
| 7/22/2011 23:59:01 | 20.156 | 7/17/2011 11:59:01 | 22.609 |
| 7/23/2011 00:39:01 | 18.591 | 7/17/2011 12:39:01 | 22.609 |
| 7/23/2011 01:19:01 | 17.339 | 7/17/2011 13:19:01 | 22.609 |
| 7/23/2011 01:59:01 | 16.462 | 7/17/2011 13:59:01 | 22.609 |
| 7/23/2011 02:39:01 | 15.835 | 7/17/2011 14:39:01 | 22.609 |
| 7/23/2011 03:19:01 | 15.271 | 7/17/2011 15:19:01 | 22.671 |
| 7/23/2011 03:59:01 | 14.957 | 7/17/2011 15:59:01 | 22.671 |
| 7/23/2011 04:39:01 | 14.707 | 7/17/2011 16:39:01 | 22.671 |
| 7/23/2011 05:19:01 | 14.832 | 7/17/2011 17:19:01 | 22.734 |
| 7/23/2011 05:59:01 | 14.393 | 7/17/2011 17:59:01 | 22.734 |
| 7/23/2011 06:39:01 | 14.519 | 7/17/2011 18:39:01 | 22.734 |
| 7/23/2011 07:19:01 | 15.898 | 7/17/2011 19:19:01 | 22.796 |
| 7/23/2011 07:59:01 | 18.215 | 7/17/2011 19:59:01 | 22.796 |
| 7/23/2011 08:39:01 | 21.408 | 7/17/2011 20:39:01 | 22.796 |
| 7/23/2011 09:19:01 | 25.222 | 7/17/2011 21:19:01 | 22.859 |
| 7/23/2011 09:59:01 | 27.159 | 7/17/2011 21:59:01 | 22.859 |
| 7/23/2011 10:39:01 | 29.094 | 7/17/2011 22:39:01 | 22.859 |
| 7/23/2011 11:19:01 | 30.779 | 7/17/2011 23:19:01 | 22.859 |
| 7/23/2011 11:59:01 | 30.592 | 7/17/2011 23:59:01 | 22.859 |
| 7/23/2011 12:39:01 | 31.153 | 7/18/2011 00:39:01 | 22.859 |
| 7/23/2011 13:19:01 | 31.278 | 7/18/2011 01:19:01 | 22.796 |
| 7/23/2011 13:59:01 | 31.465 | 7/18/2011 01:59:01 | 22.796 |
| 7/23/2011 14:39:01 | 31.590 | 7/18/2011 02:39:01 | 22.796 |
| 7/23/2011 15:19:01 | 31.216 | 7/18/2011 03:19:01 | 22.796 |
| 7/23/2011 15:59:01 | 29.843 | 7/18/2011 03:59:01 | 22.734 |
| 7/23/2011 16:39:01 | 27.533 | 7/18/2011 04:39:01 | 22.734 |
| 7/23/2011 17:19:01 | 25.347 | 7/18/2011 05:19:01 | 22.734 |
| 7/23/2011 17:59:01 | 22.909 | 7/18/2011 05:59:01 | 22.671 |
| 7/23/2011 18:39:01 | 21.095 | 7/18/2011 06:39:01 | 22.671 |
| 7/23/2011 19:19:01 | 19.968 | 7/18/2011 07:19:01 | 22.609 |
| 7/23/2011 19:59:01 | 20.156 | 7/18/2011 07:59:01 | 22.609 |
| 7/23/2011 20:39:01 | 21.846 | 7/18/2011 08:39:01 | 22.609 |

|                    |        |                    |        |
|--------------------|--------|--------------------|--------|
| 7/23/2011 21:19:01 | 22.534 | 7/18/2011 09:19:01 | 22.546 |
| 7/23/2011 21:59:01 | 22.846 | 7/18/2011 09:59:01 | 22.546 |
| 7/23/2011 22:39:01 | 22.221 | 7/18/2011 10:39:01 | 22.546 |
| 7/23/2011 23:19:01 | 20.845 | 7/18/2011 11:19:01 | 22.483 |
| 7/23/2011 23:59:01 | 20.219 | 7/18/2011 11:59:01 | 22.483 |
| 7/24/2011 00:39:01 | 19.280 | 7/18/2011 12:39:01 | 22.483 |
| 7/24/2011 01:19:01 | 18.403 | 7/18/2011 13:19:01 | 22.483 |
| 7/24/2011 01:59:01 | 17.714 | 7/18/2011 13:59:01 | 22.483 |
| 7/24/2011 02:39:01 | 16.900 | 7/18/2011 14:39:01 | 22.546 |
| 7/24/2011 03:19:01 | 16.148 | 7/18/2011 15:19:01 | 22.546 |
| 7/24/2011 03:59:01 | 15.710 | 7/18/2011 15:59:01 | 22.546 |
| 7/24/2011 04:39:01 | 15.145 | 7/18/2011 16:39:01 | 22.609 |
| 7/24/2011 05:19:01 | 14.895 | 7/18/2011 17:19:01 | 22.609 |
| 7/24/2011 05:59:01 | 14.205 | 7/18/2011 17:59:01 | 22.671 |
| 7/24/2011 06:39:01 | 13.766 | 7/18/2011 18:39:01 | 22.671 |
| 7/24/2011 07:19:01 | 16.274 | 7/18/2011 19:19:01 | 22.734 |
| 7/24/2011 07:59:01 | 19.217 | 7/18/2011 19:59:01 | 22.734 |
| 7/24/2011 08:39:01 | 22.346 | 7/18/2011 20:39:01 | 22.796 |
| 7/24/2011 09:19:01 | 24.909 | 7/18/2011 21:19:01 | 22.796 |
| 7/24/2011 09:59:01 | 26.784 | 7/18/2011 21:59:01 | 22.796 |
| 7/24/2011 10:39:01 | 28.969 | 7/18/2011 22:39:01 | 22.796 |
| 7/24/2011 11:19:01 | 29.781 | 7/18/2011 23:19:01 | 22.796 |
| 7/24/2011 11:59:01 | 30.342 | 7/18/2011 23:59:01 | 22.796 |
| 7/24/2011 12:39:01 | 30.966 | 7/19/2011 00:39:01 | 22.796 |
| 7/24/2011 13:19:01 | 31.091 | 7/19/2011 01:19:01 | 22.796 |
| 7/24/2011 13:59:01 | 31.278 | 7/19/2011 01:59:01 | 22.796 |
| 7/24/2011 14:39:01 | 31.527 | 7/19/2011 02:39:01 | 22.796 |
| 7/24/2011 15:19:01 | 29.281 | 7/19/2011 03:19:01 | 22.796 |
| 7/24/2011 15:59:01 | 29.094 | 7/19/2011 03:59:01 | 22.734 |
| 7/24/2011 16:39:01 | 26.909 | 7/19/2011 04:39:01 | 22.734 |
| 7/24/2011 17:19:01 | 24.222 | 7/19/2011 05:19:01 | 22.734 |
| 7/24/2011 17:59:01 | 22.221 | 7/19/2011 05:59:01 | 22.671 |
| 7/24/2011 18:39:01 | 19.843 | 7/19/2011 06:39:01 | 22.671 |
| 7/24/2011 19:19:01 | 18.466 | 7/19/2011 07:19:01 | 22.609 |
| 7/24/2011 19:59:01 | 17.840 | 7/19/2011 07:59:01 | 22.609 |
| 7/24/2011 20:39:01 | 19.280 | 7/19/2011 08:39:01 | 22.609 |
| 7/24/2011 21:19:01 | 18.716 | 7/19/2011 09:19:01 | 22.546 |
| 7/24/2011 21:59:01 | 18.341 | 7/19/2011 09:59:01 | 22.546 |
| 7/24/2011 22:39:01 | 18.153 | 7/19/2011 10:39:01 | 22.483 |
| 7/24/2011 23:19:01 | 17.589 | 7/19/2011 11:19:01 | 22.483 |
| 7/24/2011 23:59:01 | 16.837 | 7/19/2011 11:59:01 | 22.483 |
| 7/25/2011 00:39:01 | 16.775 | 7/19/2011 12:39:01 | 22.483 |
| 7/25/2011 01:19:01 | 16.336 | 7/19/2011 13:19:01 | 22.483 |
| 7/25/2011 01:59:01 | 16.086 | 7/19/2011 13:59:01 | 22.483 |
| 7/25/2011 02:39:01 | 15.710 | 7/19/2011 14:39:01 | 22.483 |
| 7/25/2011 03:19:01 | 15.271 | 7/19/2011 15:19:01 | 22.546 |
| 7/25/2011 03:59:01 | 14.895 | 7/19/2011 15:59:01 | 22.546 |
| 7/25/2011 04:39:01 | 14.644 | 7/19/2011 16:39:01 | 22.609 |
| 7/25/2011 05:19:01 | 14.142 | 7/19/2011 17:19:01 | 22.609 |
| 7/25/2011 05:59:01 | 13.703 | 7/19/2011 17:59:01 | 22.671 |

|                    |        |                    |        |
|--------------------|--------|--------------------|--------|
| 7/25/2011 06:39:01 | 13.703 | 7/19/2011 18:39:01 | 22.671 |
| 7/25/2011 07:19:01 | 15.647 | 7/19/2011 19:19:01 | 22.734 |
| 7/25/2011 07:59:01 | 18.842 | 7/19/2011 19:59:01 | 22.734 |
| 7/25/2011 08:39:01 | 21.470 | 7/19/2011 20:39:01 | 22.734 |
| 7/25/2011 09:19:01 | 23.784 | 7/19/2011 21:19:01 | 22.734 |
| 7/25/2011 09:59:01 | 26.034 | 7/19/2011 21:59:01 | 22.796 |
| 7/25/2011 10:39:01 | 27.970 | 7/19/2011 22:39:01 | 22.796 |
| 7/25/2011 11:19:01 | 29.157 | 7/19/2011 23:19:01 | 22.796 |
| 7/25/2011 11:59:01 | 29.718 | 7/19/2011 23:59:01 | 22.796 |
| 7/25/2011 12:39:01 | 30.966 | 7/20/2011 00:39:01 | 22.734 |
| 7/25/2011 13:19:01 | 30.966 | 7/20/2011 01:19:01 | 22.734 |
| 7/25/2011 13:59:01 | 31.403 | 7/20/2011 01:59:01 | 22.734 |
| 7/25/2011 14:39:01 | 30.841 | 7/20/2011 02:39:01 | 22.671 |
| 7/25/2011 15:19:01 | 30.529 | 7/20/2011 03:19:01 | 22.671 |
| 7/25/2011 15:59:01 | 29.219 | 7/20/2011 03:59:01 | 22.671 |
| 7/25/2011 16:39:01 | 26.534 | 7/20/2011 04:39:01 | 22.609 |
| 7/25/2011 17:19:01 | 23.909 | 7/20/2011 05:19:01 | 22.609 |
| 7/25/2011 17:59:01 | 21.408 | 7/20/2011 05:59:01 | 22.546 |
| 7/25/2011 18:39:01 | 19.155 | 7/20/2011 06:39:01 | 22.546 |
| 7/25/2011 19:19:01 | 17.527 | 7/20/2011 07:19:01 | 22.483 |
| 7/25/2011 19:59:01 | 16.211 | 7/20/2011 07:59:01 | 22.483 |
| 7/25/2011 20:39:01 | 15.083 | 7/20/2011 08:39:01 | 22.421 |
| 7/25/2011 21:19:01 | 14.205 | 7/20/2011 09:19:01 | 22.421 |
| 7/25/2011 21:59:01 | 13.641 | 7/20/2011 09:59:01 | 22.358 |
| 7/25/2011 22:39:01 | 13.703 | 7/20/2011 10:39:01 | 22.358 |
| 7/25/2011 23:19:01 | 13.515 | 7/20/2011 11:19:01 | 22.296 |
| 7/25/2011 23:59:01 | 14.205 | 7/20/2011 11:59:01 | 22.296 |
| 7/26/2011 00:39:01 | 14.205 | 7/20/2011 12:39:01 | 22.296 |
| 7/26/2011 01:19:01 | 13.954 | 7/20/2011 13:19:01 | 22.296 |
| 7/26/2011 01:59:01 | 13.954 | 7/20/2011 13:59:01 | 22.296 |
| 7/26/2011 02:39:01 | 14.080 | 7/20/2011 14:39:01 | 22.358 |
| 7/26/2011 03:19:01 | 13.641 | 7/20/2011 15:19:01 | 22.358 |
| 7/26/2011 03:59:01 | 13.139 | 7/20/2011 15:59:01 | 22.358 |
| 7/26/2011 04:39:01 | 12.825 | 7/20/2011 16:39:01 | 22.421 |
| 7/26/2011 05:19:01 | 12.512 | 7/20/2011 17:19:01 | 22.483 |
| 7/26/2011 05:59:01 | 12.135 | 7/20/2011 17:59:01 | 22.483 |
| 7/26/2011 06:39:01 | 11.947 | 7/20/2011 18:39:01 | 22.546 |
| 7/26/2011 07:19:01 | 12.512 | 7/20/2011 19:19:01 | 22.546 |
| 7/26/2011 07:59:01 | 15.145 | 7/20/2011 19:59:01 | 22.609 |
| 7/26/2011 08:39:01 | 19.092 | 7/20/2011 20:39:01 | 22.609 |
| 7/26/2011 09:19:01 | 22.784 | 7/20/2011 21:19:01 | 22.609 |
| 7/26/2011 09:59:01 | 25.409 | 7/20/2011 21:59:01 | 22.671 |
| 7/26/2011 10:39:01 | 27.658 | 7/20/2011 22:39:01 | 22.671 |
| 7/26/2011 11:19:01 | 29.344 | 7/20/2011 23:19:01 | 22.671 |
| 7/26/2011 11:59:01 | 29.968 | 7/20/2011 23:59:01 | 22.671 |
| 7/26/2011 12:39:01 | 30.467 | 7/21/2011 00:39:01 | 22.671 |
| 7/26/2011 13:19:01 | 30.654 | 7/21/2011 01:19:01 | 22.671 |
| 7/26/2011 13:59:01 | 31.340 | 7/21/2011 01:59:01 | 22.671 |
| 7/26/2011 14:39:01 | 31.278 | 7/21/2011 02:39:01 | 22.671 |
| 7/26/2011 15:19:01 | 30.654 | 7/21/2011 03:19:01 | 22.671 |

|                    |        |                    |        |
|--------------------|--------|--------------------|--------|
| 7/26/2011 15:59:01 | 29.406 | 7/21/2011 03:59:01 | 22.671 |
| 7/26/2011 16:39:01 | 26.472 | 7/21/2011 04:39:01 | 22.671 |
| 7/26/2011 17:19:01 | 23.784 | 7/21/2011 05:19:01 | 22.609 |
| 7/26/2011 17:59:01 | 21.595 | 7/21/2011 05:59:01 | 22.609 |
| 7/26/2011 18:39:01 | 19.593 | 7/21/2011 06:39:01 | 22.609 |
| 7/26/2011 19:19:01 | 17.777 | 7/21/2011 07:19:01 | 22.609 |
| 7/26/2011 19:59:01 | 16.524 | 7/21/2011 07:59:01 | 22.609 |
| 7/26/2011 20:39:01 | 16.399 | 7/21/2011 08:39:01 | 22.546 |
| 7/26/2011 21:19:01 | 16.336 | 7/21/2011 09:19:01 | 22.546 |
| 7/26/2011 21:59:01 | 16.462 | 7/21/2011 09:59:01 | 22.546 |
| 7/26/2011 22:39:01 | 15.835 | 7/21/2011 10:39:01 | 22.483 |
| 7/26/2011 23:19:01 | 15.647 | 7/21/2011 11:19:01 | 22.483 |
| 7/26/2011 23:59:01 | 16.274 | 7/21/2011 11:59:01 | 22.483 |
| 7/27/2011 00:39:01 | 15.710 | 7/21/2011 12:39:01 | 22.483 |
| 7/27/2011 01:19:01 | 15.459 | 7/21/2011 13:19:01 | 22.483 |
| 7/27/2011 01:59:01 | 15.145 | 7/21/2011 13:59:01 | 22.483 |
| 7/27/2011 02:39:01 | 14.769 | 7/21/2011 14:39:01 | 22.546 |
| 7/27/2011 03:19:01 | 14.456 | 7/21/2011 15:19:01 | 22.546 |
| 7/27/2011 03:59:01 | 14.080 | 7/21/2011 15:59:01 | 22.609 |
| 7/27/2011 04:39:01 | 13.766 | 7/21/2011 16:39:01 | 22.609 |
| 7/27/2011 05:19:01 | 13.515 | 7/21/2011 17:19:01 | 22.609 |
| 7/27/2011 05:59:01 | 13.264 | 7/21/2011 17:59:01 | 22.671 |
| 7/27/2011 06:39:01 | 13.076 | 7/21/2011 18:39:01 | 22.734 |
| 7/27/2011 07:19:01 | 13.829 | 7/21/2011 19:19:01 | 22.734 |
| 7/27/2011 07:59:01 | 16.274 | 7/21/2011 19:59:01 | 22.734 |
| 7/27/2011 08:39:01 | 20.094 | 7/21/2011 20:39:01 | 22.796 |
| 7/27/2011 09:19:01 | 23.722 | 7/21/2011 21:19:01 | 22.796 |
| 7/27/2011 09:59:01 | 25.972 | 7/21/2011 21:59:01 | 22.796 |
| 7/27/2011 10:39:01 | 28.158 | 7/21/2011 22:39:01 | 22.796 |
| 7/27/2011 11:19:01 | 29.593 | 7/21/2011 23:19:01 | 22.796 |
| 7/27/2011 11:59:01 | 30.155 | 7/21/2011 23:59:01 | 22.796 |
| 7/27/2011 12:39:01 | 30.093 | 7/22/2011 00:39:01 | 22.796 |
| 7/27/2011 13:19:01 | 28.158 | 7/22/2011 01:19:01 | 22.796 |
| 7/27/2011 13:59:01 | 28.907 | 7/22/2011 01:59:01 | 22.734 |
| 7/27/2011 14:39:01 | 28.907 | 7/22/2011 02:39:01 | 22.734 |
| 7/27/2011 15:19:01 | 29.656 | 7/22/2011 03:19:01 | 22.734 |
| 7/27/2011 15:59:01 | 28.532 | 7/22/2011 03:59:01 | 22.734 |
| 7/27/2011 16:39:01 | 26.222 | 7/22/2011 04:39:01 | 22.671 |
| 7/27/2011 17:19:01 | 23.534 | 7/22/2011 05:19:01 | 22.671 |
| 7/27/2011 17:59:01 | 21.283 | 7/22/2011 05:59:01 | 22.671 |
| 7/27/2011 18:39:01 | 19.092 | 7/22/2011 06:39:01 | 22.609 |
| 7/27/2011 19:19:01 | 17.464 | 7/22/2011 07:19:01 | 22.609 |
| 7/27/2011 19:59:01 | 16.336 | 7/22/2011 07:59:01 | 22.546 |
| 7/27/2011 20:39:01 | 15.522 | 7/22/2011 08:39:01 | 22.546 |
| 7/27/2011 21:19:01 | 14.832 | 7/22/2011 09:19:01 | 22.546 |
| 7/27/2011 21:59:01 | 14.330 | 7/22/2011 09:59:01 | 22.483 |
| 7/27/2011 22:39:01 | 14.017 | 7/22/2011 10:39:01 | 22.483 |
| 7/27/2011 23:19:01 | 14.142 | 7/22/2011 11:19:01 | 22.483 |
| 7/27/2011 23:59:01 | 14.017 | 7/22/2011 11:59:01 | 22.421 |
| 7/28/2011 00:39:01 | 14.393 | 7/22/2011 12:39:01 | 22.421 |

|                    |        |                    |        |
|--------------------|--------|--------------------|--------|
| 7/28/2011 01:19:01 | 14.080 | 7/22/2011 13:19:01 | 22.421 |
| 7/28/2011 01:59:01 | 13.954 | 7/22/2011 13:59:01 | 22.483 |
| 7/28/2011 02:39:01 | 13.641 | 7/22/2011 14:39:01 | 22.483 |
| 7/28/2011 03:19:01 | 13.264 | 7/22/2011 15:19:01 | 22.483 |
| 7/28/2011 03:59:01 | 13.076 | 7/22/2011 15:59:01 | 22.546 |
| 7/28/2011 04:39:01 | 12.574 | 7/22/2011 16:39:01 | 22.546 |
| 7/28/2011 05:19:01 | 12.700 | 7/22/2011 17:19:01 | 22.609 |
| 7/28/2011 05:59:01 | 12.888 | 7/22/2011 17:59:01 | 22.609 |
| 7/28/2011 06:39:01 | 13.453 | 7/22/2011 18:39:01 | 22.671 |
| 7/28/2011 07:19:01 | 13.829 | 7/22/2011 19:19:01 | 22.671 |
| 7/28/2011 07:59:01 | 16.023 | 7/22/2011 19:59:01 | 22.734 |
| 7/28/2011 08:39:01 | 19.906 | 7/22/2011 20:39:01 | 22.734 |
| 7/28/2011 09:19:01 | 24.034 | 7/22/2011 21:19:01 | 22.734 |
| 7/28/2011 09:59:01 | 26.596 | 7/22/2011 21:59:01 | 22.796 |
| 7/28/2011 10:39:01 | 28.844 | 7/22/2011 22:39:01 | 22.796 |
| 7/28/2011 11:19:01 | 30.155 | 7/22/2011 23:19:01 | 22.796 |
| 7/28/2011 11:59:01 | 30.779 | 7/22/2011 23:59:01 | 22.796 |
| 7/28/2011 12:39:01 | 31.278 | 7/23/2011 00:39:01 | 22.796 |
| 7/28/2011 13:19:01 | 30.904 | 7/23/2011 01:19:01 | 22.796 |
| 7/28/2011 13:59:01 | 31.465 | 7/23/2011 01:59:01 | 22.859 |
| 7/28/2011 14:39:01 | 31.340 | 7/23/2011 02:39:01 | 22.796 |
| 7/28/2011 15:19:01 | 30.467 | 7/23/2011 03:19:01 | 22.796 |
| 7/28/2011 15:59:01 | 28.720 | 7/23/2011 03:59:01 | 22.796 |
| 7/28/2011 16:39:01 | 26.534 | 7/23/2011 04:39:01 | 22.796 |
| 7/28/2011 17:19:01 | 24.097 | 7/23/2011 05:19:01 | 22.796 |
| 7/28/2011 17:59:01 | 21.658 | 7/23/2011 05:59:01 | 22.796 |
| 7/28/2011 18:39:01 | 19.468 | 7/23/2011 06:39:01 | 22.734 |
| 7/28/2011 19:19:01 | 18.090 | 7/23/2011 07:19:01 | 22.734 |
| 7/28/2011 19:59:01 | 16.900 | 7/23/2011 07:59:01 | 22.671 |
| 7/28/2011 20:39:01 | 15.960 | 7/23/2011 08:39:01 | 22.671 |
| 7/28/2011 21:19:01 | 16.086 | 7/23/2011 09:19:01 | 22.671 |
| 7/28/2011 21:59:01 | 16.649 | 7/23/2011 09:59:01 | 22.609 |
| 7/28/2011 22:39:01 | 16.712 | 7/23/2011 10:39:01 | 22.609 |
| 7/28/2011 23:19:01 | 16.462 | 7/23/2011 11:19:01 | 22.609 |
| 7/28/2011 23:59:01 | 16.211 | 7/23/2011 11:59:01 | 22.546 |
| 7/29/2011 00:39:01 | 16.336 | 7/23/2011 12:39:01 | 22.546 |
| 7/29/2011 01:19:01 | 16.274 | 7/23/2011 13:19:01 | 22.609 |
| 7/29/2011 01:59:01 | 16.148 | 7/23/2011 13:59:01 | 22.609 |
| 7/29/2011 02:39:01 | 15.710 | 7/23/2011 14:39:01 | 22.609 |
| 7/29/2011 03:19:01 | 14.957 | 7/23/2011 15:19:01 | 22.609 |
| 7/29/2011 03:59:01 | 14.581 | 7/23/2011 15:59:01 | 22.671 |
| 7/29/2011 04:39:01 | 14.707 | 7/23/2011 16:39:01 | 22.671 |
| 7/29/2011 05:19:01 | 14.581 | 7/23/2011 17:19:01 | 22.671 |
| 7/29/2011 05:59:01 | 14.205 | 7/23/2011 17:59:01 | 22.734 |
| 7/29/2011 06:39:01 | 13.829 | 7/23/2011 18:39:01 | 22.734 |
| 7/29/2011 07:19:01 | 14.456 | 7/23/2011 19:19:01 | 22.734 |
| 7/29/2011 07:59:01 | 16.900 | 7/23/2011 19:59:01 | 22.796 |
| 7/29/2011 08:39:01 | 21.095 | 7/23/2011 20:39:01 | 22.796 |
| 7/29/2011 09:19:01 | 24.597 | 7/23/2011 21:19:01 | 22.796 |
| 7/29/2011 09:59:01 | 26.909 | 7/23/2011 21:59:01 | 22.859 |

|                    |        |                    |        |
|--------------------|--------|--------------------|--------|
| 7/29/2011 10:39:01 | 29.157 | 7/23/2011 22:39:01 | 22.859 |
| 7/29/2011 11:19:01 | 29.843 | 7/23/2011 23:19:01 | 22.859 |
| 7/29/2011 11:59:01 | 31.091 | 7/23/2011 23:59:01 | 22.859 |
| 7/29/2011 12:39:01 | 31.278 | 7/24/2011 00:39:01 | 22.859 |
| 7/29/2011 13:19:01 | 31.403 | 7/24/2011 01:19:01 | 22.859 |
| 7/29/2011 13:59:01 | 31.964 | 7/24/2011 01:59:01 | 22.859 |
| 7/29/2011 14:39:01 | 32.026 | 7/24/2011 02:39:01 | 22.859 |
| 7/29/2011 15:19:01 | 30.280 | 7/24/2011 03:19:01 | 22.859 |
| 7/29/2011 15:59:01 | 29.905 | 7/24/2011 03:59:01 | 22.859 |
| 7/29/2011 16:39:01 | 27.346 | 7/24/2011 04:39:01 | 22.859 |
| 7/29/2011 17:19:01 | 24.722 | 7/24/2011 05:19:01 | 22.796 |
| 7/29/2011 17:59:01 | 22.846 | 7/24/2011 05:59:01 | 22.796 |
| 7/29/2011 18:39:01 | 20.782 | 7/24/2011 06:39:01 | 22.796 |
| 7/29/2011 19:19:01 | 19.280 | 7/24/2011 07:19:01 | 22.734 |
| 7/29/2011 19:59:01 | 18.215 | 7/24/2011 07:59:01 | 22.734 |
| 7/29/2011 20:39:01 | 18.153 | 7/24/2011 08:39:01 | 22.734 |
| 7/29/2011 21:19:01 | 17.965 | 7/24/2011 09:19:01 | 22.671 |
| 7/29/2011 21:59:01 | 18.153 | 7/24/2011 09:59:01 | 22.671 |
| 7/29/2011 22:39:01 | 18.153 | 7/24/2011 10:39:01 | 22.609 |
| 7/29/2011 23:19:01 | 18.215 | 7/24/2011 11:19:01 | 22.609 |
| 7/29/2011 23:59:01 | 18.403 | 7/24/2011 11:59:01 | 22.609 |
| 7/30/2011 00:39:01 | 17.714 | 7/24/2011 12:39:01 | 22.609 |
| 7/30/2011 01:19:01 | 17.025 | 7/24/2011 13:19:01 | 22.609 |
| 7/30/2011 01:59:01 | 16.963 | 7/24/2011 13:59:01 | 22.609 |
| 7/30/2011 02:39:01 | 17.025 | 7/24/2011 14:39:01 | 22.609 |
| 7/30/2011 03:19:01 | 16.524 | 7/24/2011 15:19:01 | 22.609 |
| 7/30/2011 03:59:01 | 15.772 | 7/24/2011 15:59:01 | 22.671 |
| 7/30/2011 04:39:01 | 15.271 | 7/24/2011 16:39:01 | 22.671 |
| 7/30/2011 05:19:01 | 14.957 | 7/24/2011 17:19:01 | 22.671 |
| 7/30/2011 05:59:01 | 15.020 | 7/24/2011 17:59:01 | 22.734 |
| 7/30/2011 06:39:01 | 14.644 | 7/24/2011 18:39:01 | 22.734 |
| 7/30/2011 07:19:01 | 15.271 | 7/24/2011 19:19:01 | 22.734 |
| 7/30/2011 07:59:01 | 17.902 | 7/24/2011 19:59:01 | 22.796 |
| 7/30/2011 08:39:01 | 22.158 | 7/24/2011 20:39:01 | 22.796 |
| 7/30/2011 09:19:01 | 25.784 | 7/24/2011 21:19:01 | 22.796 |
| 7/30/2011 09:59:01 | 27.783 | 7/24/2011 21:59:01 | 22.796 |
| 7/30/2011 10:39:01 | 29.281 | 7/24/2011 22:39:01 | 22.796 |
| 7/30/2011 11:19:01 | 30.342 | 7/24/2011 23:19:01 | 22.796 |
| 7/30/2011 11:59:01 | 31.403 | 7/24/2011 23:59:01 | 22.796 |
| 7/30/2011 12:39:01 | 31.777 | 7/25/2011 00:39:01 | 22.796 |
| 7/30/2011 13:19:01 | 31.652 | 7/25/2011 01:19:01 | 22.796 |
| 7/30/2011 13:59:01 | 32.401 | 7/25/2011 01:59:01 | 22.796 |
| 7/30/2011 14:39:01 | 32.712 | 7/25/2011 02:39:01 | 22.734 |
| 7/30/2011 15:19:01 | 32.026 | 7/25/2011 03:19:01 | 22.734 |
| 7/30/2011 15:59:01 | 30.217 | 7/25/2011 03:59:01 | 22.734 |
| 7/30/2011 16:39:01 | 27.034 | 7/25/2011 04:39:01 | 22.734 |
| 7/30/2011 17:19:01 | 25.347 | 7/25/2011 05:19:01 | 22.671 |
| 7/30/2011 17:59:01 | 23.409 | 7/25/2011 05:59:01 | 22.671 |
| 7/30/2011 18:39:01 | 21.345 | 7/25/2011 06:39:01 | 22.671 |
| 7/30/2011 19:19:01 | 19.906 | 7/25/2011 07:19:01 | 22.609 |

|                    |        |                    |        |
|--------------------|--------|--------------------|--------|
| 7/30/2011 19:59:01 | 18.842 | 7/25/2011 07:59:01 | 22.609 |
| 7/30/2011 20:39:01 | 18.090 | 7/25/2011 08:39:01 | 22.546 |
| 7/30/2011 21:19:01 | 17.840 | 7/25/2011 09:19:01 | 22.546 |
| 7/30/2011 21:59:01 | 19.280 | 7/25/2011 09:59:01 | 22.546 |
| 7/30/2011 22:39:01 | 19.343 | 7/25/2011 10:39:01 | 22.483 |
| 7/30/2011 23:19:01 | 18.842 | 7/25/2011 11:19:01 | 22.483 |
| 7/30/2011 23:59:01 | 17.714 | 7/25/2011 11:59:01 | 22.483 |
| 7/31/2011 00:39:01 | 17.276 | 7/25/2011 12:39:01 | 22.483 |
| 7/31/2011 01:19:01 | 16.775 | 7/25/2011 13:19:01 | 22.483 |
| 7/31/2011 01:59:01 | 16.336 | 7/25/2011 13:59:01 | 22.483 |
| 7/31/2011 02:39:01 | 15.960 | 7/25/2011 14:39:01 | 22.483 |
| 7/31/2011 03:19:01 | 15.522 | 7/25/2011 15:19:01 | 22.483 |
| 7/31/2011 03:59:01 | 15.208 | 7/25/2011 15:59:01 | 22.483 |
| 7/31/2011 04:39:01 | 15.208 | 7/25/2011 16:39:01 | 22.546 |
| 7/31/2011 05:19:01 | 15.020 | 7/25/2011 17:19:01 | 22.546 |
| 7/31/2011 05:59:01 | 14.832 | 7/25/2011 17:59:01 | 22.609 |
| 7/31/2011 06:39:01 | 14.581 | 7/25/2011 18:39:01 | 22.609 |
| 7/31/2011 07:19:01 | 15.145 | 7/25/2011 19:19:01 | 22.609 |
| 7/31/2011 07:59:01 | 17.714 | 7/25/2011 19:59:01 | 22.609 |
| 7/31/2011 08:39:01 | 21.345 | 7/25/2011 20:39:01 | 22.671 |
| 7/31/2011 09:19:01 | 24.972 | 7/25/2011 21:19:01 | 22.671 |
| 7/31/2011 09:59:01 | 27.159 | 7/25/2011 21:59:01 | 22.671 |
| 7/31/2011 10:39:01 | 28.907 | 7/25/2011 22:39:01 | 22.671 |
| 7/31/2011 11:19:01 | 30.654 | 7/25/2011 23:19:01 | 22.671 |
| 7/31/2011 11:59:01 | 31.153 | 7/25/2011 23:59:01 | 22.609 |
| 7/31/2011 12:39:01 | 31.777 | 7/26/2011 00:39:01 | 22.609 |
| 7/31/2011 13:19:01 | 32.151 | 7/26/2011 01:19:01 | 22.609 |
| 7/31/2011 13:59:01 | 31.964 | 7/26/2011 01:59:01 | 22.609 |
| 7/31/2011 14:39:01 | 32.151 | 7/26/2011 02:39:01 | 22.546 |
| 7/31/2011 15:19:01 | 31.652 | 7/26/2011 03:19:01 | 22.546 |
| 7/31/2011 15:59:01 | 30.467 | 7/26/2011 03:59:01 | 22.483 |
| 7/31/2011 16:39:01 | 27.908 | 7/26/2011 04:39:01 | 22.483 |
| 7/31/2011 17:19:01 | 25.347 | 7/26/2011 05:19:01 | 22.421 |
| 7/31/2011 17:59:01 | 23.159 | 7/26/2011 05:59:01 | 22.421 |
| 7/31/2011 18:39:01 | 21.157 | 7/26/2011 06:39:01 | 22.358 |
| 7/31/2011 19:19:01 | 19.656 | 7/26/2011 07:19:01 | 22.358 |
| 7/31/2011 19:59:01 | 19.217 | 7/26/2011 07:59:01 | 22.296 |
| 7/31/2011 20:39:01 | 18.967 | 7/26/2011 08:39:01 | 22.296 |
| 7/31/2011 21:19:01 | 18.654 | 7/26/2011 09:19:01 | 22.233 |
| 7/31/2011 21:59:01 | 18.529 | 7/26/2011 09:59:01 | 22.233 |
| 7/31/2011 22:39:01 | 18.028 | 7/26/2011 10:39:01 | 22.171 |
| 7/31/2011 23:19:01 | 17.840 | 7/26/2011 11:19:01 | 22.171 |
| 7/31/2011 23:59:01 | 17.652 | 7/26/2011 11:59:01 | 22.171 |
| 8/1/2011 00:39:01  | 17.401 | 7/26/2011 12:39:01 | 22.171 |
| 8/1/2011 01:19:01  | 17.151 | 7/26/2011 13:19:01 | 22.171 |
| 8/1/2011 01:59:01  | 17.025 | 7/26/2011 13:59:01 | 22.171 |
| 8/1/2011 02:39:01  | 17.088 | 7/26/2011 14:39:01 | 22.171 |
| 8/1/2011 03:19:01  | 16.524 | 7/26/2011 15:19:01 | 22.233 |
| 8/1/2011 03:59:01  | 16.086 | 7/26/2011 15:59:01 | 22.233 |
| 8/1/2011 04:39:01  | 15.898 | 7/26/2011 16:39:01 | 22.233 |



|                   |        |                    |        |
|-------------------|--------|--------------------|--------|
| 8/1/2011 05:19:01 | 15.647 | 7/26/2011 17:19:01 | 22.296 |
| 8/1/2011 05:59:01 | 15.208 | 7/26/2011 17:59:01 | 22.296 |
| 8/1/2011 06:39:01 | 15.647 | 7/26/2011 18:39:01 | 22.358 |
| 8/1/2011 07:19:01 | 17.902 | 7/26/2011 19:19:01 | 22.358 |
| 8/1/2011 07:59:01 | 20.719 | 7/26/2011 19:59:01 | 22.358 |
| 8/1/2011 08:39:01 | 23.847 | 7/26/2011 20:39:01 | 22.421 |
| 8/1/2011 09:19:01 | 26.347 | 7/26/2011 21:19:01 | 22.421 |
| 8/1/2011 09:59:01 | 28.407 | 7/26/2011 21:59:01 | 22.421 |
| 8/1/2011 10:39:01 | 30.093 | 7/26/2011 22:39:01 | 22.421 |
| 8/1/2011 11:19:01 | 31.091 | 7/26/2011 23:19:01 | 22.421 |
| 8/1/2011 11:59:01 | 32.151 | 7/26/2011 23:59:01 | 22.421 |
| 8/1/2011 12:39:01 | 32.338 | 7/27/2011 00:39:01 | 22.421 |
| 8/1/2011 13:19:01 | 32.463 | 7/27/2011 01:19:01 | 22.421 |
| 8/1/2011 13:59:01 | 32.837 | 7/27/2011 01:59:01 | 22.421 |
| 8/1/2011 14:39:01 | 33.024 | 7/27/2011 02:39:01 | 22.358 |
| 8/1/2011 15:19:01 | 32.151 | 7/27/2011 03:19:01 | 22.358 |
| 8/1/2011 15:59:01 | 30.966 | 7/27/2011 03:59:01 | 22.358 |
| 8/1/2011 16:39:01 | 28.657 | 7/27/2011 04:39:01 | 22.296 |
| 8/1/2011 17:19:01 | 26.284 | 7/27/2011 05:19:01 | 22.296 |
| 8/1/2011 17:59:01 | 24.097 | 7/27/2011 05:59:01 | 22.296 |
| 8/1/2011 18:39:01 | 22.409 | 7/27/2011 06:39:01 | 22.233 |
| 8/1/2011 19:19:01 | 20.907 | 7/27/2011 07:19:01 | 22.233 |
| 8/1/2011 19:59:01 | 19.656 | 7/27/2011 07:59:01 | 22.233 |
| 8/1/2011 20:39:01 | 19.280 | 7/27/2011 08:39:01 | 22.171 |
| 8/1/2011 21:19:01 | 18.779 | 7/27/2011 09:19:01 | 22.171 |
| 8/1/2011 21:59:01 | 18.341 | 7/27/2011 09:59:01 | 22.171 |
| 8/1/2011 22:39:01 | 18.466 | 7/27/2011 10:39:01 | 22.108 |
| 8/1/2011 23:19:01 | 18.341 | 7/27/2011 11:19:01 | 22.108 |
| 8/1/2011 23:59:01 | 18.028 | 7/27/2011 11:59:01 | 22.108 |
| 8/2/2011 00:39:01 | 17.652 | 7/27/2011 12:39:01 | 22.108 |
| 8/2/2011 01:19:01 | 17.025 | 7/27/2011 13:19:01 | 22.108 |
| 8/2/2011 01:59:01 | 16.587 | 7/27/2011 13:59:01 | 22.108 |
| 8/2/2011 02:39:01 | 16.274 | 7/27/2011 14:39:01 | 22.171 |
| 8/2/2011 03:19:01 | 16.274 | 7/27/2011 15:19:01 | 22.171 |
| 8/2/2011 03:59:01 | 16.148 | 7/27/2011 15:59:01 | 22.233 |
| 8/2/2011 04:39:01 | 15.647 | 7/27/2011 16:39:01 | 22.233 |
| 8/2/2011 05:19:01 | 15.208 | 7/27/2011 17:19:01 | 22.233 |
| 8/2/2011 05:59:01 | 14.957 | 7/27/2011 17:59:01 | 22.296 |
| 8/2/2011 06:39:01 | 14.644 | 7/27/2011 18:39:01 | 22.296 |
| 8/2/2011 07:19:01 | 15.333 | 7/27/2011 19:19:01 | 22.358 |
| 8/2/2011 07:59:01 | 17.777 | 7/27/2011 19:59:01 | 22.358 |
| 8/2/2011 08:39:01 | 21.783 | 7/27/2011 20:39:01 | 22.358 |
| 8/2/2011 09:19:01 | 26.097 | 7/27/2011 21:19:01 | 22.421 |
| 8/2/2011 09:59:01 | 28.283 | 7/27/2011 21:59:01 | 22.421 |
| 8/2/2011 10:39:01 | 29.968 | 7/27/2011 22:39:01 | 22.421 |
| 8/2/2011 11:19:01 | 30.966 | 7/27/2011 23:19:01 | 22.421 |
| 8/2/2011 11:59:01 | 31.777 | 7/27/2011 23:59:01 | 22.421 |
| 8/2/2011 12:39:01 | 32.213 | 7/28/2011 00:39:01 | 22.358 |
| 8/2/2011 13:19:01 | 32.650 | 7/28/2011 01:19:01 | 22.358 |
| 8/2/2011 13:59:01 | 31.403 | 7/28/2011 01:59:01 | 22.358 |

|                   |        |                    |        |
|-------------------|--------|--------------------|--------|
| 8/2/2011 14:39:01 | 32.712 | 7/28/2011 02:39:01 | 22.296 |
| 8/2/2011 15:19:01 | 31.839 | 7/28/2011 03:19:01 | 22.296 |
| 8/2/2011 15:59:01 | 30.904 | 7/28/2011 03:59:01 | 22.296 |
| 8/2/2011 16:39:01 | 30.217 | 7/28/2011 04:39:01 | 22.233 |
| 8/2/2011 17:19:01 | 28.345 | 7/28/2011 05:19:01 | 22.233 |
| 8/2/2011 17:59:01 | 26.159 | 7/28/2011 05:59:01 | 22.233 |
| 8/2/2011 18:39:01 | 24.659 | 7/28/2011 06:39:01 | 22.171 |
| 8/2/2011 19:19:01 | 23.597 | 7/28/2011 07:19:01 | 22.171 |
| 8/2/2011 19:59:01 | 23.284 | 7/28/2011 07:59:01 | 22.108 |
| 8/2/2011 20:39:01 | 24.159 | 7/28/2011 08:39:01 | 22.108 |
| 8/2/2011 21:19:01 | 25.159 | 7/28/2011 09:19:01 | 22.046 |
| 8/2/2011 21:59:01 | 24.534 | 7/28/2011 09:59:01 | 22.046 |
| 8/2/2011 22:39:01 | 23.972 | 7/28/2011 10:39:01 | 22.046 |
| 8/2/2011 23:19:01 | 23.159 | 7/28/2011 11:19:01 | 21.983 |
| 8/2/2011 23:59:01 | 22.659 | 7/28/2011 11:59:01 | 21.983 |
| 8/3/2011 00:39:01 | 22.158 | 7/28/2011 12:39:01 | 21.983 |
| 8/3/2011 01:19:01 | 21.220 | 7/28/2011 13:19:01 | 21.983 |
| 8/3/2011 01:59:01 | 19.280 | 7/28/2011 13:59:01 | 22.046 |
| 8/3/2011 02:39:01 | 18.215 | 7/28/2011 14:39:01 | 22.046 |
| 8/3/2011 03:19:01 | 17.401 | 7/28/2011 15:19:01 | 22.046 |
| 8/3/2011 03:59:01 | 16.649 | 7/28/2011 15:59:01 | 22.108 |
| 8/3/2011 04:39:01 | 16.086 | 7/28/2011 16:39:01 | 22.108 |
| 8/3/2011 05:19:01 | 16.211 | 7/28/2011 17:19:01 | 22.171 |
| 8/3/2011 05:59:01 | 16.462 | 7/28/2011 17:59:01 | 22.171 |
| 8/3/2011 06:39:01 | 16.775 | 7/28/2011 18:39:01 | 22.233 |
| 8/3/2011 07:19:01 | 17.965 | 7/28/2011 19:19:01 | 22.233 |
| 8/3/2011 07:59:01 | 19.968 | 7/28/2011 19:59:01 | 22.233 |
| 8/3/2011 08:39:01 | 24.659 | 7/28/2011 20:39:01 | 22.296 |
| 8/3/2011 09:19:01 | 27.159 | 7/28/2011 21:19:01 | 22.296 |
| 8/3/2011 09:59:01 | 29.094 | 7/28/2011 21:59:01 | 22.296 |
| 8/3/2011 10:39:01 | 30.467 | 7/28/2011 22:39:01 | 22.296 |
| 8/3/2011 11:19:01 | 31.403 | 7/28/2011 23:19:01 | 22.296 |
| 8/3/2011 11:59:01 | 30.841 | 7/28/2011 23:59:01 | 22.296 |
| 8/3/2011 12:39:01 | 30.654 | 7/29/2011 00:39:01 | 22.296 |
| 8/3/2011 13:19:01 | 31.403 | 7/29/2011 01:19:01 | 22.296 |
| 8/3/2011 13:59:01 | 30.280 | 7/29/2011 01:59:01 | 22.296 |
| 8/3/2011 14:39:01 | 30.717 | 7/29/2011 02:39:01 | 22.296 |
| 8/3/2011 15:19:01 | 30.966 | 7/29/2011 03:19:01 | 22.233 |
| 8/3/2011 15:59:01 | 30.093 | 7/29/2011 03:59:01 | 22.233 |
| 8/3/2011 16:39:01 | 28.969 | 7/29/2011 04:39:01 | 22.233 |
| 8/3/2011 17:19:01 | 27.408 | 7/29/2011 05:19:01 | 22.233 |
| 8/3/2011 17:59:01 | 25.409 | 7/29/2011 05:59:01 | 22.171 |
| 8/3/2011 18:39:01 | 24.409 | 7/29/2011 06:39:01 | 22.171 |
| 8/3/2011 19:19:01 | 23.784 | 7/29/2011 07:19:01 | 22.171 |
| 8/3/2011 19:59:01 | 23.347 | 7/29/2011 07:59:01 | 22.108 |
| 8/3/2011 20:39:01 | 23.097 | 7/29/2011 08:39:01 | 22.108 |
| 8/3/2011 21:19:01 | 22.909 | 7/29/2011 09:19:01 | 22.108 |
| 8/3/2011 21:59:01 | 22.346 | 7/29/2011 09:59:01 | 22.108 |
| 8/3/2011 22:39:01 | 20.845 | 7/29/2011 10:39:01 | 22.046 |
| 8/3/2011 23:19:01 | 19.530 | 7/29/2011 11:19:01 | 22.046 |

|                   |        |                    |        |
|-------------------|--------|--------------------|--------|
| 8/3/2011 23:59:01 | 18.842 | 7/29/2011 11:59:01 | 22.046 |
| 8/4/2011 00:39:01 | 18.341 | 7/29/2011 12:39:01 | 22.046 |
| 8/4/2011 01:19:01 | 17.464 | 7/29/2011 13:19:01 | 22.046 |
| 8/4/2011 01:59:01 | 16.963 | 7/29/2011 13:59:01 | 22.046 |
| 8/4/2011 02:39:01 | 16.462 | 7/29/2011 14:39:01 | 22.108 |
| 8/4/2011 03:19:01 | 15.835 | 7/29/2011 15:19:01 | 22.108 |
| 8/4/2011 03:59:01 | 15.333 | 7/29/2011 15:59:01 | 22.108 |
| 8/4/2011 04:39:01 | 14.895 | 7/29/2011 16:39:01 | 22.171 |
| 8/4/2011 05:19:01 | 14.581 | 7/29/2011 17:19:01 | 22.171 |
| 8/4/2011 05:59:01 | 14.330 | 7/29/2011 17:59:01 | 22.233 |
| 8/4/2011 06:39:01 | 15.584 | 7/29/2011 18:39:01 | 22.233 |
| 8/4/2011 07:19:01 | 18.090 | 7/29/2011 19:19:01 | 22.296 |
| 8/4/2011 07:59:01 | 21.157 | 7/29/2011 19:59:01 | 22.296 |
| 8/4/2011 08:39:01 | 23.972 | 7/29/2011 20:39:01 | 22.358 |
| 8/4/2011 09:19:01 | 25.909 | 7/29/2011 21:19:01 | 22.358 |
| 8/4/2011 09:59:01 | 27.596 | 7/29/2011 21:59:01 | 22.358 |
| 8/4/2011 10:39:01 | 28.969 | 7/29/2011 22:39:01 | 22.358 |
| 8/4/2011 11:19:01 | 29.781 | 7/29/2011 23:19:01 | 22.358 |
| 8/4/2011 11:59:01 | 30.654 | 7/29/2011 23:59:01 | 22.358 |
| 8/4/2011 12:39:01 | 31.403 | 7/30/2011 00:39:01 | 22.358 |
| 8/4/2011 13:19:01 | 31.527 | 7/30/2011 01:19:01 | 22.358 |
| 8/4/2011 13:59:01 | 32.026 | 7/30/2011 01:59:01 | 22.358 |
| 8/4/2011 14:39:01 | 32.089 | 7/30/2011 02:39:01 | 22.358 |
| 8/4/2011 15:19:01 | 31.091 | 7/30/2011 03:19:01 | 22.358 |
| 8/4/2011 15:59:01 | 30.030 | 7/30/2011 03:59:01 | 22.358 |
| 8/4/2011 16:39:01 | 28.907 | 7/30/2011 04:39:01 | 22.358 |
| 8/4/2011 17:19:01 | 27.596 | 7/30/2011 05:19:01 | 22.358 |
| 8/4/2011 17:59:01 | 25.909 | 7/30/2011 05:59:01 | 22.296 |
| 8/4/2011 18:39:01 | 23.284 | 7/30/2011 06:39:01 | 22.296 |
| 8/4/2011 19:19:01 | 22.534 | 7/30/2011 07:19:01 | 22.296 |
| 8/4/2011 19:59:01 | 21.345 | 7/30/2011 07:59:01 | 22.296 |
| 8/4/2011 20:39:01 | 20.782 | 7/30/2011 08:39:01 | 22.233 |
| 8/4/2011 21:19:01 | 22.846 | 7/30/2011 09:19:01 | 22.233 |
| 8/4/2011 21:59:01 | 22.909 | 7/30/2011 09:59:01 | 22.233 |
| 8/4/2011 22:39:01 | 22.471 | 7/30/2011 10:39:01 | 22.233 |
| 8/4/2011 23:19:01 | 22.158 | 7/30/2011 11:19:01 | 22.171 |
| 8/4/2011 23:59:01 | 21.908 | 7/30/2011 11:59:01 | 22.171 |
| 8/5/2011 00:39:01 | 21.220 | 7/30/2011 12:39:01 | 22.171 |
| 8/5/2011 01:19:01 | 19.593 | 7/30/2011 13:19:01 | 22.233 |
| 8/5/2011 01:59:01 | 18.779 | 7/30/2011 13:59:01 | 22.233 |
| 8/5/2011 02:39:01 | 18.278 | 7/30/2011 14:39:01 | 22.233 |
| 8/5/2011 03:19:01 | 17.902 | 7/30/2011 15:19:01 | 22.296 |
| 8/5/2011 03:59:01 | 17.088 | 7/30/2011 15:59:01 | 22.296 |
| 8/5/2011 04:39:01 | 17.151 | 7/30/2011 16:39:01 | 22.358 |
| 8/5/2011 05:19:01 | 16.524 | 7/30/2011 17:19:01 | 22.358 |
| 8/5/2011 05:59:01 | 15.772 | 7/30/2011 17:59:01 | 22.421 |
| 8/5/2011 06:39:01 | 15.020 | 7/30/2011 18:39:01 | 22.421 |
| 8/5/2011 07:19:01 | 16.023 | 7/30/2011 19:19:01 | 22.483 |
| 8/5/2011 07:59:01 | 18.904 | 7/30/2011 19:59:01 | 22.483 |
| 8/5/2011 08:39:01 | 22.721 | 7/30/2011 20:39:01 | 22.546 |

|                   |        |                    |        |
|-------------------|--------|--------------------|--------|
| 8/5/2011 09:19:01 | 25.409 | 7/30/2011 21:19:01 | 22.546 |
| 8/5/2011 09:59:01 | 27.658 | 7/30/2011 21:59:01 | 22.546 |
| 8/5/2011 10:39:01 | 29.593 | 7/30/2011 22:39:01 | 22.546 |
| 8/5/2011 11:19:01 | 30.529 | 7/30/2011 23:19:01 | 22.546 |
| 8/5/2011 11:59:01 | 31.465 | 7/30/2011 23:59:01 | 22.546 |
| 8/5/2011 12:39:01 | 31.340 | 7/31/2011 00:39:01 | 22.546 |
| 8/5/2011 13:19:01 | 32.775 | 7/31/2011 01:19:01 | 22.546 |
| 8/5/2011 13:59:01 | 32.525 | 7/31/2011 01:59:01 | 22.546 |
| 8/5/2011 14:39:01 | 32.650 | 7/31/2011 02:39:01 | 22.546 |
| 8/5/2011 15:19:01 | 32.026 | 7/31/2011 03:19:01 | 22.546 |
| 8/5/2011 15:59:01 | 31.028 | 7/31/2011 03:59:01 | 22.546 |
| 8/5/2011 16:39:01 | 30.405 | 7/31/2011 04:39:01 | 22.483 |
| 8/5/2011 17:19:01 | 29.281 | 7/31/2011 05:19:01 | 22.483 |
| 8/5/2011 17:59:01 | 27.221 | 7/31/2011 05:59:01 | 22.483 |
| 8/5/2011 18:39:01 | 25.159 | 7/31/2011 06:39:01 | 22.483 |
| 8/5/2011 19:19:01 | 23.972 | 7/31/2011 07:19:01 | 22.421 |
| 8/5/2011 19:59:01 | 22.909 | 7/31/2011 07:59:01 | 22.421 |
| 8/5/2011 20:39:01 | 21.971 | 7/31/2011 08:39:01 | 22.421 |
| 8/5/2011 21:19:01 | 21.220 | 7/31/2011 09:19:01 | 22.358 |
| 8/5/2011 21:59:01 | 22.096 | 7/31/2011 09:59:01 | 22.358 |
| 8/5/2011 22:39:01 | 23.034 | 7/31/2011 10:39:01 | 22.358 |
| 8/5/2011 23:19:01 | 23.222 | 7/31/2011 11:19:01 | 22.296 |
| 8/5/2011 23:59:01 | 22.221 | 7/31/2011 11:59:01 | 22.296 |
| 8/6/2011 00:39:01 | 20.907 | 7/31/2011 12:39:01 | 22.296 |
| 8/6/2011 01:19:01 | 19.781 | 7/31/2011 13:19:01 | 22.296 |
| 8/6/2011 01:59:01 | 19.530 | 7/31/2011 13:59:01 | 22.358 |
| 8/6/2011 02:39:01 | 18.466 | 7/31/2011 14:39:01 | 22.358 |
| 8/6/2011 03:19:01 | 17.777 | 7/31/2011 15:19:01 | 22.358 |
| 8/6/2011 03:59:01 | 17.401 | 7/31/2011 15:59:01 | 22.421 |
| 8/6/2011 04:39:01 | 17.151 | 7/31/2011 16:39:01 | 22.421 |
| 8/6/2011 05:19:01 | 16.462 | 7/31/2011 17:19:01 | 22.483 |
| 8/6/2011 05:59:01 | 16.211 | 7/31/2011 17:59:01 | 22.483 |
| 8/6/2011 06:39:01 | 15.960 | 7/31/2011 18:39:01 | 22.546 |
| 8/6/2011 07:19:01 | 16.775 | 7/31/2011 19:19:01 | 22.546 |
| 8/6/2011 07:59:01 | 19.906 | 7/31/2011 19:59:01 | 22.609 |
| 8/6/2011 08:39:01 | 23.722 | 7/31/2011 20:39:01 | 22.609 |
| 8/6/2011 09:19:01 | 26.909 | 7/31/2011 21:19:01 | 22.609 |
| 8/6/2011 09:59:01 | 28.407 | 7/31/2011 21:59:01 | 22.671 |
| 8/6/2011 10:39:01 | 29.905 | 7/31/2011 22:39:01 | 22.671 |
| 8/6/2011 11:19:01 | 30.966 | 7/31/2011 23:19:01 | 22.671 |
| 8/6/2011 11:59:01 | 31.777 | 7/31/2011 23:59:01 | 22.671 |
| 8/6/2011 12:39:01 | 31.964 | 8/1/2011 00:39:01  | 22.671 |
| 8/6/2011 13:19:01 | 32.650 | 8/1/2011 01:19:01  | 22.671 |
| 8/6/2011 13:59:01 | 33.336 | 8/1/2011 01:59:01  | 22.609 |
| 8/6/2011 14:39:01 | 33.211 | 8/1/2011 02:39:01  | 22.609 |
| 8/6/2011 15:19:01 | 31.715 | 8/1/2011 03:19:01  | 22.609 |
| 8/6/2011 15:59:01 | 30.841 | 8/1/2011 03:59:01  | 22.609 |
| 8/6/2011 16:39:01 | 29.593 | 8/1/2011 04:39:01  | 22.546 |
| 8/6/2011 17:19:01 | 29.219 | 8/1/2011 05:19:01  | 22.546 |
| 8/6/2011 17:59:01 | 27.596 | 8/1/2011 05:59:01  | 22.546 |

|                   |        |                   |        |
|-------------------|--------|-------------------|--------|
| 8/6/2011 18:39:01 | 25.472 | 8/1/2011 06:39:01 | 22.546 |
| 8/6/2011 19:19:01 | 24.534 | 8/1/2011 07:19:01 | 22.483 |
| 8/6/2011 19:59:01 | 25.159 | 8/1/2011 07:59:01 | 22.483 |
| 8/6/2011 20:39:01 | 24.472 | 8/1/2011 08:39:01 | 22.483 |
| 8/6/2011 21:19:01 | 23.909 | 8/1/2011 09:19:01 | 22.421 |
| 8/6/2011 21:59:01 | 23.659 | 8/1/2011 09:59:01 | 22.421 |
| 8/6/2011 22:39:01 | 22.596 | 8/1/2011 10:39:01 | 22.421 |
| 8/6/2011 23:19:01 | 21.408 | 8/1/2011 11:19:01 | 22.421 |
| 8/6/2011 23:59:01 | 20.970 | 8/1/2011 11:59:01 | 22.421 |
| 8/7/2011 00:39:01 | 19.968 | 8/1/2011 12:39:01 | 22.421 |
| 8/7/2011 01:19:01 | 19.343 | 8/1/2011 13:19:01 | 22.421 |
| 8/7/2011 01:59:01 | 19.092 | 8/1/2011 13:59:01 | 22.421 |
| 8/7/2011 02:39:01 | 19.092 | 8/1/2011 14:39:01 | 22.483 |
| 8/7/2011 03:19:01 | 18.654 | 8/1/2011 15:19:01 | 22.483 |
| 8/7/2011 03:59:01 | 17.965 | 8/1/2011 15:59:01 | 22.483 |
| 8/7/2011 04:39:01 | 17.213 | 8/1/2011 16:39:01 | 22.546 |
| 8/7/2011 05:19:01 | 16.587 | 8/1/2011 17:19:01 | 22.546 |
| 8/7/2011 05:59:01 | 16.775 | 8/1/2011 17:59:01 | 22.609 |
| 8/7/2011 06:39:01 | 18.090 | 8/1/2011 18:39:01 | 22.609 |
| 8/7/2011 07:19:01 | 19.155 | 8/1/2011 19:19:01 | 22.671 |
| 8/7/2011 07:59:01 | 21.345 | 8/1/2011 19:59:01 | 22.671 |
| 8/7/2011 08:39:01 | 25.034 | 8/1/2011 20:39:01 | 22.671 |
| 8/7/2011 09:19:01 | 27.221 | 8/1/2011 21:19:01 | 22.734 |
| 8/7/2011 09:59:01 | 28.907 | 8/1/2011 21:59:01 | 22.734 |
| 8/7/2011 10:39:01 | 30.529 | 8/1/2011 22:39:01 | 22.734 |
| 8/7/2011 11:19:01 | 31.403 | 8/1/2011 23:19:01 | 22.734 |
| 8/7/2011 11:59:01 | 31.902 | 8/1/2011 23:59:01 | 22.734 |
| 8/7/2011 12:39:01 | 32.213 | 8/2/2011 00:39:01 | 22.734 |
| 8/7/2011 13:19:01 | 32.899 | 8/2/2011 01:19:01 | 22.734 |
| 8/7/2011 13:59:01 | 33.460 | 8/2/2011 01:59:01 | 22.734 |
| 8/7/2011 14:39:01 | 33.336 | 8/2/2011 02:39:01 | 22.734 |
| 8/7/2011 15:19:01 | 32.775 | 8/2/2011 03:19:01 | 22.734 |
| 8/7/2011 15:59:01 | 31.403 | 8/2/2011 03:59:01 | 22.671 |
| 8/7/2011 16:39:01 | 30.467 | 8/2/2011 04:39:01 | 22.671 |
| 8/7/2011 17:19:01 | 28.283 | 8/2/2011 05:19:01 | 22.671 |
| 8/7/2011 17:59:01 | 26.721 | 8/2/2011 05:59:01 | 22.671 |
| 8/7/2011 18:39:01 | 24.597 | 8/2/2011 06:39:01 | 22.609 |
| 8/7/2011 19:19:01 | 22.721 | 8/2/2011 07:19:01 | 22.609 |
| 8/7/2011 19:59:01 | 21.908 | 8/2/2011 07:59:01 | 22.609 |
| 8/7/2011 20:39:01 | 21.595 | 8/2/2011 08:39:01 | 22.546 |
| 8/7/2011 21:19:01 | 23.034 | 8/2/2011 09:19:01 | 22.546 |
| 8/7/2011 21:59:01 | 23.097 | 8/2/2011 09:59:01 | 22.546 |
| 8/7/2011 22:39:01 | 21.220 | 8/2/2011 10:39:01 | 22.483 |
| 8/7/2011 23:19:01 | 19.217 | 8/2/2011 11:19:01 | 22.483 |
| 8/7/2011 23:59:01 | 17.840 | 8/2/2011 11:59:01 | 22.483 |
| 8/8/2011 00:39:01 | 16.775 | 8/2/2011 12:39:01 | 22.483 |
| 8/8/2011 01:19:01 | 16.148 | 8/2/2011 13:19:01 | 22.483 |
| 8/8/2011 01:59:01 | 15.333 | 8/2/2011 13:59:01 | 22.483 |
| 8/8/2011 02:39:01 | 14.832 | 8/2/2011 14:39:01 | 22.546 |
| 8/8/2011 03:19:01 | 14.268 | 8/2/2011 15:19:01 | 22.546 |

|                   |        |                   |        |
|-------------------|--------|-------------------|--------|
| 8/8/2011 03:59:01 | 13.829 | 8/2/2011 15:59:01 | 22.546 |
| 8/8/2011 04:39:01 | 14.142 | 8/2/2011 16:39:01 | 22.609 |
| 8/8/2011 05:19:01 | 15.271 | 8/2/2011 17:19:01 | 22.609 |
| 8/8/2011 05:59:01 | 15.333 | 8/2/2011 17:59:01 | 22.671 |
| 8/8/2011 06:39:01 | 15.459 | 8/2/2011 18:39:01 | 22.671 |
| 8/8/2011 07:19:01 | 17.339 | 8/2/2011 19:19:01 | 22.734 |
| 8/8/2011 07:59:01 | 19.718 | 8/2/2011 19:59:01 | 22.734 |
| 8/8/2011 08:39:01 | 23.347 | 8/2/2011 20:39:01 | 22.796 |
| 8/8/2011 09:19:01 | 26.659 | 8/2/2011 21:19:01 | 22.796 |
| 8/8/2011 09:59:01 | 27.783 | 8/2/2011 21:59:01 | 22.796 |
| 8/8/2011 10:39:01 | 29.656 | 8/2/2011 22:39:01 | 22.859 |
| 8/8/2011 11:19:01 | 30.342 | 8/2/2011 23:19:01 | 22.859 |
| 8/8/2011 11:59:01 | 31.278 | 8/2/2011 23:59:01 | 22.859 |
| 8/8/2011 12:39:01 | 31.777 | 8/3/2011 00:39:01 | 22.859 |
| 8/8/2011 13:19:01 | 32.588 | 8/3/2011 01:19:01 | 22.921 |
| 8/8/2011 13:59:01 | 32.089 | 8/3/2011 01:59:01 | 22.921 |
| 8/8/2011 14:39:01 | 33.024 | 8/3/2011 02:39:01 | 22.921 |
| 8/8/2011 15:19:01 | 30.342 | 8/3/2011 03:19:01 | 22.921 |
| 8/8/2011 15:59:01 | 30.717 | 8/3/2011 03:59:01 | 22.921 |
| 8/8/2011 16:39:01 | 28.782 | 8/3/2011 04:39:01 | 22.921 |
| 8/8/2011 17:19:01 | 26.222 | 8/3/2011 05:19:01 | 22.921 |
| 8/8/2011 17:59:01 | 23.909 | 8/3/2011 05:59:01 | 22.859 |
| 8/8/2011 18:39:01 | 21.595 | 8/3/2011 06:39:01 | 22.859 |
| 8/8/2011 19:19:01 | 20.219 | 8/3/2011 07:19:01 | 22.859 |
| 8/8/2011 19:59:01 | 19.343 | 8/3/2011 07:59:01 | 22.859 |
| 8/8/2011 20:39:01 | 18.716 | 8/3/2011 08:39:01 | 22.796 |
| 8/8/2011 21:19:01 | 18.967 | 8/3/2011 09:19:01 | 22.796 |
| 8/8/2011 21:59:01 | 18.529 | 8/3/2011 09:59:01 | 22.734 |
| 8/8/2011 22:39:01 | 18.153 | 8/3/2011 10:39:01 | 22.734 |
| 8/8/2011 23:19:01 | 17.714 | 8/3/2011 11:19:01 | 22.734 |
| 8/8/2011 23:59:01 | 17.652 | 8/3/2011 11:59:01 | 22.734 |
| 8/9/2011 00:39:01 | 17.840 | 8/3/2011 12:39:01 | 22.734 |
| 8/9/2011 01:19:01 | 18.153 | 8/3/2011 13:19:01 | 22.734 |
| 8/9/2011 01:59:01 | 18.153 | 8/3/2011 13:59:01 | 22.734 |
| 8/9/2011 02:39:01 | 17.965 | 8/3/2011 14:39:01 | 22.734 |
| 8/9/2011 03:19:01 | 18.341 | 8/3/2011 15:19:01 | 22.796 |
| 8/9/2011 03:59:01 | 18.028 | 8/3/2011 15:59:01 | 22.796 |
| 8/9/2011 04:39:01 | 17.777 | 8/3/2011 16:39:01 | 22.859 |
| 8/9/2011 05:19:01 | 17.213 | 8/3/2011 17:19:01 | 22.859 |
| 8/9/2011 05:59:01 | 16.712 | 8/3/2011 17:59:01 | 22.921 |
| 8/9/2011 06:39:01 | 16.837 | 8/3/2011 18:39:01 | 22.921 |
| 8/9/2011 07:19:01 | 18.215 | 8/3/2011 19:19:01 | 22.984 |
| 8/9/2011 07:59:01 | 20.907 | 8/3/2011 19:59:01 | 22.984 |
| 8/9/2011 08:39:01 | 22.846 | 8/3/2011 20:39:01 | 23.046 |
| 8/9/2011 09:19:01 | 26.159 | 8/3/2011 21:19:01 | 23.046 |
| 8/9/2011 09:59:01 | 27.783 | 8/3/2011 21:59:01 | 23.046 |
| 8/9/2011 10:39:01 | 29.032 | 8/3/2011 22:39:01 | 23.046 |
| 8/9/2011 11:19:01 | 30.904 | 8/3/2011 23:19:01 | 23.046 |
| 8/9/2011 11:59:01 | 32.026 | 8/3/2011 23:59:01 | 23.046 |
| 8/9/2011 12:39:01 | 31.902 | 8/4/2011 00:39:01 | 23.046 |

|                    |        |                   |        |
|--------------------|--------|-------------------|--------|
| 8/9/2011 13:19:01  | 28.969 | 8/4/2011 01:19:01 | 23.046 |
| 8/9/2011 13:59:01  | 28.969 | 8/4/2011 01:59:01 | 23.046 |
| 8/9/2011 14:39:01  | 29.968 | 8/4/2011 02:39:01 | 23.046 |
| 8/9/2011 15:19:01  | 30.093 | 8/4/2011 03:19:01 | 23.046 |
| 8/9/2011 15:59:01  | 28.470 | 8/4/2011 03:59:01 | 23.046 |
| 8/9/2011 16:39:01  | 27.471 | 8/4/2011 04:39:01 | 22.984 |
| 8/9/2011 17:19:01  | 26.721 | 8/4/2011 05:19:01 | 22.984 |
| 8/9/2011 17:59:01  | 24.909 | 8/4/2011 05:59:01 | 22.984 |
| 8/9/2011 18:39:01  | 23.284 | 8/4/2011 06:39:01 | 22.984 |
| 8/9/2011 19:19:01  | 22.346 | 8/4/2011 07:19:01 | 22.921 |
| 8/9/2011 19:59:01  | 21.658 | 8/4/2011 07:59:01 | 22.921 |
| 8/9/2011 20:39:01  | 20.970 | 8/4/2011 08:39:01 | 22.859 |
| 8/9/2011 21:19:01  | 20.407 | 8/4/2011 09:19:01 | 22.859 |
| 8/9/2011 21:59:01  | 19.593 | 8/4/2011 09:59:01 | 22.859 |
| 8/9/2011 22:39:01  | 19.092 | 8/4/2011 10:39:01 | 22.796 |
| 8/9/2011 23:19:01  | 18.153 | 8/4/2011 11:19:01 | 22.796 |
| 8/9/2011 23:59:01  | 17.339 | 8/4/2011 11:59:01 | 22.796 |
| 8/10/2011 00:39:01 | 16.649 | 8/4/2011 12:39:01 | 22.796 |
| 8/10/2011 01:19:01 | 16.086 | 8/4/2011 13:19:01 | 22.796 |
| 8/10/2011 01:59:01 | 15.584 | 8/4/2011 13:59:01 | 22.796 |
| 8/10/2011 02:39:01 | 14.957 | 8/4/2011 14:39:01 | 22.796 |
| 8/10/2011 03:19:01 | 14.330 | 8/4/2011 15:19:01 | 22.796 |
| 8/10/2011 03:59:01 | 13.829 | 8/4/2011 15:59:01 | 22.859 |
| 8/10/2011 04:39:01 | 13.390 | 8/4/2011 16:39:01 | 22.859 |
| 8/10/2011 05:19:01 | 12.951 | 8/4/2011 17:19:01 | 22.859 |
| 8/10/2011 05:59:01 | 12.512 | 8/4/2011 17:59:01 | 22.859 |
| 8/10/2011 06:39:01 | 12.324 | 8/4/2011 18:39:01 | 22.921 |
| 8/10/2011 07:19:01 | 13.264 | 8/4/2011 19:19:01 | 22.921 |
| 8/10/2011 07:59:01 | 16.148 | 8/4/2011 19:59:01 | 22.921 |
| 8/10/2011 08:39:01 | 19.968 | 8/4/2011 20:39:01 | 22.921 |
| 8/10/2011 09:19:01 | 23.284 | 8/4/2011 21:19:01 | 22.984 |
| 8/10/2011 09:59:01 | 25.784 | 8/4/2011 21:59:01 | 22.984 |
| 8/10/2011 10:39:01 | 28.407 | 8/4/2011 22:39:01 | 22.984 |
| 8/10/2011 11:19:01 | 30.155 | 8/4/2011 23:19:01 | 22.984 |
| 8/10/2011 11:59:01 | 31.153 | 8/4/2011 23:59:01 | 22.984 |
| 8/10/2011 12:39:01 | 31.964 | 8/5/2011 00:39:01 | 22.984 |
| 8/10/2011 13:19:01 | 32.151 | 8/5/2011 01:19:01 | 22.984 |
| 8/10/2011 13:59:01 | 32.276 | 8/5/2011 01:59:01 | 22.984 |
| 8/10/2011 14:39:01 | 31.964 | 8/5/2011 02:39:01 | 22.984 |
| 8/10/2011 15:19:01 | 31.340 | 8/5/2011 03:19:01 | 22.921 |
| 8/10/2011 15:59:01 | 29.905 | 8/5/2011 03:59:01 | 22.921 |
| 8/10/2011 16:39:01 | 27.533 | 8/5/2011 04:39:01 | 22.921 |
| 8/10/2011 17:19:01 | 24.784 | 8/5/2011 05:19:01 | 22.921 |
| 8/10/2011 17:59:01 | 22.534 | 8/5/2011 05:59:01 | 22.921 |
| 8/10/2011 18:39:01 | 20.281 | 8/5/2011 06:39:01 | 22.859 |
| 8/10/2011 19:19:01 | 19.155 | 8/5/2011 07:19:01 | 22.859 |
| 8/10/2011 19:59:01 | 18.716 | 8/5/2011 07:59:01 | 22.859 |
| 8/10/2011 20:39:01 | 18.654 | 8/5/2011 08:39:01 | 22.796 |
| 8/10/2011 21:19:01 | 17.527 | 8/5/2011 09:19:01 | 22.796 |
| 8/10/2011 21:59:01 | 17.151 | 8/5/2011 09:59:01 | 22.734 |

|                    |        |                   |        |
|--------------------|--------|-------------------|--------|
| 8/10/2011 22:39:01 | 16.900 | 8/5/2011 10:39:01 | 22.734 |
| 8/10/2011 23:19:01 | 16.587 | 8/5/2011 11:19:01 | 22.734 |
| 8/10/2011 23:59:01 | 16.274 | 8/5/2011 11:59:01 | 22.671 |
| 8/11/2011 00:39:01 | 15.647 | 8/5/2011 12:39:01 | 22.671 |
| 8/11/2011 01:19:01 | 15.710 | 8/5/2011 13:19:01 | 22.671 |
| 8/11/2011 01:59:01 | 15.083 | 8/5/2011 13:59:01 | 22.734 |
| 8/11/2011 02:39:01 | 14.581 | 8/5/2011 14:39:01 | 22.734 |
| 8/11/2011 03:19:01 | 14.080 | 8/5/2011 15:19:01 | 22.734 |
| 8/11/2011 03:59:01 | 13.390 | 8/5/2011 15:59:01 | 22.796 |
| 8/11/2011 04:39:01 | 12.888 | 8/5/2011 16:39:01 | 22.796 |
| 8/11/2011 05:19:01 | 12.574 | 8/5/2011 17:19:01 | 22.859 |
| 8/11/2011 05:59:01 | 12.574 | 8/5/2011 17:59:01 | 22.859 |
| 8/11/2011 06:39:01 | 12.512 | 8/5/2011 18:39:01 | 22.921 |
| 8/11/2011 07:19:01 | 13.641 | 8/5/2011 19:19:01 | 22.921 |
| 8/11/2011 07:59:01 | 16.649 | 8/5/2011 19:59:01 | 22.984 |
| 8/11/2011 08:39:01 | 21.408 | 8/5/2011 20:39:01 | 22.984 |
| 8/11/2011 09:19:01 | 25.659 | 8/5/2011 21:19:01 | 22.984 |
| 8/11/2011 09:59:01 | 28.033 | 8/5/2011 21:59:01 | 23.046 |
| 8/11/2011 10:39:01 | 29.843 | 8/5/2011 22:39:01 | 23.046 |
| 8/11/2011 11:19:01 | 31.403 | 8/5/2011 23:19:01 | 23.046 |
| 8/11/2011 11:59:01 | 31.527 | 8/5/2011 23:59:01 | 23.046 |
| 8/11/2011 12:39:01 | 32.588 | 8/6/2011 00:39:01 | 23.046 |
| 8/11/2011 13:19:01 | 31.839 | 8/6/2011 01:19:01 | 23.109 |
| 8/11/2011 13:59:01 | 33.772 | 8/6/2011 01:59:01 | 23.109 |
| 8/11/2011 14:39:01 | 31.278 | 8/6/2011 02:39:01 | 23.109 |
| 8/11/2011 15:19:01 | 29.718 | 8/6/2011 03:19:01 | 23.109 |
| 8/11/2011 15:59:01 | 28.720 | 8/6/2011 03:59:01 | 23.046 |
| 8/11/2011 16:39:01 | 28.532 | 8/6/2011 04:39:01 | 23.046 |
| 8/11/2011 17:19:01 | 27.034 | 8/6/2011 05:19:01 | 23.046 |
| 8/11/2011 17:59:01 | 25.159 | 8/6/2011 05:59:01 | 23.046 |
| 8/11/2011 18:39:01 | 23.159 | 8/6/2011 06:39:01 | 23.046 |
| 8/11/2011 19:19:01 | 21.533 | 8/6/2011 07:19:01 | 22.984 |
| 8/11/2011 19:59:01 | 20.094 | 8/6/2011 07:59:01 | 22.984 |
| 8/11/2011 20:39:01 | 19.217 | 8/6/2011 08:39:01 | 22.984 |
| 8/11/2011 21:19:01 | 18.967 | 8/6/2011 09:19:01 | 22.921 |
| 8/11/2011 21:59:01 | 18.654 | 8/6/2011 09:59:01 | 22.921 |
| 8/11/2011 22:39:01 | 18.341 | 8/6/2011 10:39:01 | 22.921 |
| 8/11/2011 23:19:01 | 17.965 | 8/6/2011 11:19:01 | 22.859 |
| 8/11/2011 23:59:01 | 17.589 | 8/6/2011 11:59:01 | 22.859 |
| 8/12/2011 00:39:01 | 17.151 | 8/6/2011 12:39:01 | 22.859 |
| 8/12/2011 01:19:01 | 17.025 | 8/6/2011 13:19:01 | 22.859 |
| 8/12/2011 01:59:01 | 17.025 | 8/6/2011 13:59:01 | 22.859 |
| 8/12/2011 02:39:01 | 17.589 | 8/6/2011 14:39:01 | 22.921 |
| 8/12/2011 03:19:01 | 17.339 | 8/6/2011 15:19:01 | 22.921 |
| 8/12/2011 03:59:01 | 16.712 | 8/6/2011 15:59:01 | 22.921 |
| 8/12/2011 04:39:01 | 16.148 | 8/6/2011 16:39:01 | 22.984 |
| 8/12/2011 05:19:01 | 16.211 | 8/6/2011 17:19:01 | 22.984 |
| 8/12/2011 05:59:01 | 16.086 | 8/6/2011 17:59:01 | 23.046 |
| 8/12/2011 06:39:01 | 15.647 | 8/6/2011 18:39:01 | 23.046 |
| 8/12/2011 07:19:01 | 16.462 | 8/6/2011 19:19:01 | 23.109 |



|                    |        |                   |        |
|--------------------|--------|-------------------|--------|
| 8/12/2011 07:59:01 | 19.906 | 8/6/2011 19:59:01 | 23.109 |
| 8/12/2011 08:39:01 | 23.909 | 8/6/2011 20:39:01 | 23.171 |
| 8/12/2011 09:19:01 | 26.971 | 8/6/2011 21:19:01 | 23.171 |
| 8/12/2011 09:59:01 | 28.844 | 8/6/2011 21:59:01 | 23.171 |
| 8/12/2011 10:39:01 | 30.467 | 8/6/2011 22:39:01 | 23.171 |
| 8/12/2011 11:19:01 | 29.469 | 8/6/2011 23:19:01 | 23.234 |
| 8/12/2011 11:59:01 | 30.093 | 8/6/2011 23:59:01 | 23.234 |
| 8/12/2011 12:39:01 | 30.841 | 8/7/2011 00:39:01 | 23.234 |
| 8/12/2011 13:19:01 | 30.654 | 8/7/2011 01:19:01 | 23.234 |
| 8/12/2011 13:59:01 | 31.777 | 8/7/2011 01:59:01 | 23.234 |
| 8/12/2011 14:39:01 | 33.149 | 8/7/2011 02:39:01 | 23.234 |
| 8/12/2011 15:19:01 | 31.527 | 8/7/2011 03:19:01 | 23.234 |
| 8/12/2011 15:59:01 | 29.656 | 8/7/2011 03:59:01 | 23.234 |
| 8/12/2011 16:39:01 | 28.158 | 8/7/2011 04:39:01 | 23.234 |
| 8/12/2011 17:19:01 | 25.847 | 8/7/2011 05:19:01 | 23.234 |
| 8/12/2011 17:59:01 | 23.847 | 8/7/2011 05:59:01 | 23.171 |
| 8/12/2011 18:39:01 | 21.595 | 8/7/2011 06:39:01 | 23.171 |
| 8/12/2011 19:19:01 | 20.782 | 8/7/2011 07:19:01 | 23.171 |
| 8/12/2011 19:59:01 | 20.094 | 8/7/2011 07:59:01 | 23.171 |
| 8/12/2011 20:39:01 | 19.656 | 8/7/2011 08:39:01 | 23.109 |
| 8/12/2011 21:19:01 | 19.280 | 8/7/2011 09:19:01 | 23.109 |
| 8/12/2011 21:59:01 | 19.468 | 8/7/2011 09:59:01 | 23.046 |
| 8/12/2011 22:39:01 | 18.967 | 8/7/2011 10:39:01 | 23.046 |
| 8/12/2011 23:19:01 | 18.842 | 8/7/2011 11:19:01 | 23.046 |
| 8/12/2011 23:59:01 | 18.341 | 8/7/2011 11:59:01 | 23.046 |
| 8/13/2011 00:39:01 | 18.215 | 8/7/2011 12:39:01 | 23.046 |
| 8/13/2011 01:19:01 | 17.965 | 8/7/2011 13:19:01 | 23.046 |
| 8/13/2011 01:59:01 | 17.589 | 8/7/2011 13:59:01 | 23.046 |
| 8/13/2011 02:39:01 | 17.213 | 8/7/2011 14:39:01 | 23.046 |
| 8/13/2011 03:19:01 | 16.587 | 8/7/2011 15:19:01 | 23.109 |
| 8/13/2011 03:59:01 | 15.960 | 8/7/2011 15:59:01 | 23.109 |
| 8/13/2011 04:39:01 | 15.459 | 8/7/2011 16:39:01 | 23.109 |
| 8/13/2011 05:19:01 | 15.083 | 8/7/2011 17:19:01 | 23.171 |
| 8/13/2011 05:59:01 | 14.957 | 8/7/2011 17:59:01 | 23.171 |
| 8/13/2011 06:39:01 | 15.145 | 8/7/2011 18:39:01 | 23.234 |
| 8/13/2011 07:19:01 | 16.336 | 8/7/2011 19:19:01 | 23.234 |
| 8/13/2011 07:59:01 | 19.217 | 8/7/2011 19:59:01 | 23.234 |
| 8/13/2011 08:39:01 | 23.222 | 8/7/2011 20:39:01 | 23.296 |
| 8/13/2011 09:19:01 | 27.221 | 8/7/2011 21:19:01 | 23.296 |
| 8/13/2011 09:59:01 | 29.281 | 8/7/2011 21:59:01 | 23.296 |
| 8/13/2011 10:39:01 | 30.779 | 8/7/2011 22:39:01 | 23.296 |
| 8/13/2011 11:19:01 | 32.026 | 8/7/2011 23:19:01 | 23.296 |
| 8/13/2011 11:59:01 | 32.588 | 8/7/2011 23:59:01 | 23.359 |
| 8/13/2011 12:39:01 | 32.837 | 8/8/2011 00:39:01 | 23.296 |
| 8/13/2011 13:19:01 | 31.652 | 8/8/2011 01:19:01 | 23.296 |
| 8/13/2011 13:59:01 | 33.834 | 8/8/2011 01:59:01 | 23.296 |
| 8/13/2011 14:39:01 | 33.897 | 8/8/2011 02:39:01 | 23.296 |
| 8/13/2011 15:19:01 | 30.779 | 8/8/2011 03:19:01 | 23.296 |
| 8/13/2011 15:59:01 | 31.153 | 8/8/2011 03:59:01 | 23.234 |
| 8/13/2011 16:39:01 | 28.532 | 8/8/2011 04:39:01 | 23.234 |

|                    |        |                   |        |
|--------------------|--------|-------------------|--------|
| 8/13/2011 17:19:01 | 25.534 | 8/8/2011 05:19:01 | 23.234 |
| 8/13/2011 17:59:01 | 23.659 | 8/8/2011 05:59:01 | 23.171 |
| 8/13/2011 18:39:01 | 21.032 | 8/8/2011 06:39:01 | 23.171 |
| 8/13/2011 19:19:01 | 20.031 | 8/8/2011 07:19:01 | 23.109 |
| 8/13/2011 19:59:01 | 19.843 | 8/8/2011 07:59:01 | 23.046 |
| 8/13/2011 20:39:01 | 19.530 | 8/8/2011 08:39:01 | 23.046 |
| 8/13/2011 21:19:01 | 18.842 | 8/8/2011 09:19:01 | 22.984 |
| 8/13/2011 21:59:01 | 18.716 | 8/8/2011 09:59:01 | 22.984 |
| 8/13/2011 22:39:01 | 18.654 | 8/8/2011 10:39:01 | 22.984 |
| 8/13/2011 23:19:01 | 18.278 | 8/8/2011 11:19:01 | 22.921 |
| 8/13/2011 23:59:01 | 17.840 | 8/8/2011 11:59:01 | 22.921 |
| 8/14/2011 00:39:01 | 17.714 | 8/8/2011 12:39:01 | 22.921 |
| 8/14/2011 01:19:01 | 17.025 | 8/8/2011 13:19:01 | 22.921 |
| 8/14/2011 01:59:01 | 16.837 | 8/8/2011 13:59:01 | 22.921 |
| 8/14/2011 02:39:01 | 16.086 | 8/8/2011 14:39:01 | 22.984 |
| 8/14/2011 03:19:01 | 15.522 | 8/8/2011 15:19:01 | 22.984 |
| 8/14/2011 03:59:01 | 15.271 | 8/8/2011 15:59:01 | 22.984 |
| 8/14/2011 04:39:01 | 14.957 | 8/8/2011 16:39:01 | 22.984 |
| 8/14/2011 05:19:01 | 15.584 | 8/8/2011 17:19:01 | 23.046 |
| 8/14/2011 05:59:01 | 16.274 | 8/8/2011 17:59:01 | 23.046 |
| 8/14/2011 06:39:01 | 16.336 | 8/8/2011 18:39:01 | 23.109 |
| 8/14/2011 07:19:01 | 17.777 | 8/8/2011 19:19:01 | 23.109 |
| 8/14/2011 07:59:01 | 20.094 | 8/8/2011 19:59:01 | 23.171 |
| 8/14/2011 08:39:01 | 24.097 | 8/8/2011 20:39:01 | 23.171 |
| 8/14/2011 09:19:01 | 27.721 | 8/8/2011 21:19:01 | 23.171 |
| 8/14/2011 09:59:01 | 28.844 | 8/8/2011 21:59:01 | 23.171 |
| 8/14/2011 10:39:01 | 30.779 | 8/8/2011 22:39:01 | 23.171 |
| 8/14/2011 11:19:01 | 31.153 | 8/8/2011 23:19:01 | 23.171 |
| 8/14/2011 11:59:01 | 31.590 | 8/8/2011 23:59:01 | 23.171 |
| 8/14/2011 12:39:01 | 30.717 | 8/9/2011 00:39:01 | 23.171 |
| 8/14/2011 13:19:01 | 32.338 | 8/9/2011 01:19:01 | 23.171 |
| 8/14/2011 13:59:01 | 32.026 | 8/9/2011 01:59:01 | 23.171 |
| 8/14/2011 14:39:01 | 32.463 | 8/9/2011 02:39:01 | 23.109 |
| 8/14/2011 15:19:01 | 32.837 | 8/9/2011 03:19:01 | 23.109 |
| 8/14/2011 15:59:01 | 29.843 | 8/9/2011 03:59:01 | 23.109 |
| 8/14/2011 16:39:01 | 28.407 | 8/9/2011 04:39:01 | 23.109 |
| 8/14/2011 17:19:01 | 25.909 | 8/9/2011 05:19:01 | 23.046 |
| 8/14/2011 17:59:01 | 23.597 | 8/9/2011 05:59:01 | 23.046 |
| 8/14/2011 18:39:01 | 21.470 | 8/9/2011 06:39:01 | 23.046 |
| 8/14/2011 19:19:01 | 19.968 | 8/9/2011 07:19:01 | 22.984 |
| 8/14/2011 19:59:01 | 18.779 | 8/9/2011 07:59:01 | 22.984 |
| 8/14/2011 20:39:01 | 18.716 | 8/9/2011 08:39:01 | 22.984 |
| 8/14/2011 21:19:01 | 19.405 | 8/9/2011 09:19:01 | 22.984 |
| 8/14/2011 21:59:01 | 19.155 | 8/9/2011 09:59:01 | 22.921 |
| 8/14/2011 22:39:01 | 19.217 | 8/9/2011 10:39:01 | 22.921 |
| 8/14/2011 23:19:01 | 19.530 | 8/9/2011 11:19:01 | 22.921 |
| 8/14/2011 23:59:01 | 19.468 | 8/9/2011 11:59:01 | 22.921 |
| 8/15/2011 00:39:01 | 18.591 | 8/9/2011 12:39:01 | 22.921 |
| 8/15/2011 01:19:01 | 18.716 | 8/9/2011 13:19:01 | 22.921 |
| 8/15/2011 01:59:01 | 17.840 | 8/9/2011 13:59:01 | 22.921 |

|                    |        |                    |        |
|--------------------|--------|--------------------|--------|
| 8/15/2011 02:39:01 | 17.213 | 8/9/2011 14:39:01  | 22.984 |
| 8/15/2011 03:19:01 | 17.088 | 8/9/2011 15:19:01  | 22.984 |
| 8/15/2011 03:59:01 | 17.088 | 8/9/2011 15:59:01  | 22.984 |
| 8/15/2011 04:39:01 | 16.712 | 8/9/2011 16:39:01  | 23.046 |
| 8/15/2011 05:19:01 | 16.148 | 8/9/2011 17:19:01  | 23.046 |
| 8/15/2011 05:59:01 | 15.333 | 8/9/2011 17:59:01  | 23.109 |
| 8/15/2011 06:39:01 | 14.769 | 8/9/2011 18:39:01  | 23.109 |
| 8/15/2011 07:19:01 | 15.835 | 8/9/2011 19:19:01  | 23.109 |
| 8/15/2011 07:59:01 | 19.781 | 8/9/2011 19:59:01  | 23.171 |
| 8/15/2011 08:39:01 | 24.222 | 8/9/2011 20:39:01  | 23.171 |
| 8/15/2011 09:19:01 | 27.221 | 8/9/2011 21:19:01  | 23.171 |
| 8/15/2011 09:59:01 | 28.844 | 8/9/2011 21:59:01  | 23.234 |
| 8/15/2011 10:39:01 | 30.217 | 8/9/2011 22:39:01  | 23.234 |
| 8/15/2011 11:19:01 | 31.028 | 8/9/2011 23:19:01  | 23.234 |
| 8/15/2011 11:59:01 | 32.213 | 8/9/2011 23:59:01  | 23.234 |
| 8/15/2011 12:39:01 | 32.213 | 8/10/2011 00:39:01 | 23.234 |
| 8/15/2011 13:19:01 | 32.962 | 8/10/2011 01:19:01 | 23.234 |
| 8/15/2011 13:59:01 | 33.211 | 8/10/2011 01:59:01 | 23.234 |
| 8/15/2011 14:39:01 | 33.211 | 8/10/2011 02:39:01 | 23.234 |
| 8/15/2011 15:19:01 | 32.525 | 8/10/2011 03:19:01 | 23.171 |
| 8/15/2011 15:59:01 | 31.278 | 8/10/2011 03:59:01 | 23.171 |
| 8/15/2011 16:39:01 | 29.157 | 8/10/2011 04:39:01 | 23.171 |
| 8/15/2011 17:19:01 | 26.784 | 8/10/2011 05:19:01 | 23.109 |
| 8/15/2011 17:59:01 | 24.534 | 8/10/2011 05:59:01 | 23.109 |
| 8/15/2011 18:39:01 | 21.783 | 8/10/2011 06:39:01 | 23.109 |
| 8/15/2011 19:19:01 | 19.843 | 8/10/2011 07:19:01 | 23.046 |
| 8/15/2011 19:59:01 | 18.466 | 8/10/2011 07:59:01 | 22.984 |
| 8/15/2011 20:39:01 | 17.589 | 8/10/2011 08:39:01 | 22.984 |
| 8/15/2011 21:19:01 | 17.151 | 8/10/2011 09:19:01 | 22.921 |
| 8/15/2011 21:59:01 | 17.213 | 8/10/2011 09:59:01 | 22.859 |
| 8/15/2011 22:39:01 | 16.900 | 8/10/2011 10:39:01 | 22.859 |
| 8/15/2011 23:19:01 | 16.274 | 8/10/2011 11:19:01 | 22.796 |
| 8/15/2011 23:59:01 | 15.772 | 8/10/2011 11:59:01 | 22.796 |
| 8/16/2011 00:39:01 | 16.086 | 8/10/2011 12:39:01 | 22.796 |
| 8/16/2011 01:19:01 | 15.647 | 8/10/2011 13:19:01 | 22.734 |
| 8/16/2011 01:59:01 | 15.145 | 8/10/2011 13:59:01 | 22.796 |
| 8/16/2011 02:39:01 | 15.020 | 8/10/2011 14:39:01 | 22.796 |
| 8/16/2011 03:19:01 | 15.584 | 8/10/2011 15:19:01 | 22.796 |
| 8/16/2011 03:59:01 | 16.148 | 8/10/2011 15:59:01 | 22.796 |
| 8/16/2011 04:39:01 | 16.524 | 8/10/2011 16:39:01 | 22.859 |
| 8/16/2011 05:19:01 | 16.712 | 8/10/2011 17:19:01 | 22.859 |
| 8/16/2011 05:59:01 | 15.898 | 8/10/2011 17:59:01 | 22.859 |
| 8/16/2011 06:39:01 | 15.208 | 8/10/2011 18:39:01 | 22.921 |
| 8/16/2011 07:19:01 | 16.148 | 8/10/2011 19:19:01 | 22.921 |
| 8/16/2011 07:59:01 | 19.029 | 8/10/2011 19:59:01 | 22.921 |
| 8/16/2011 08:39:01 | 23.472 | 8/10/2011 20:39:01 | 22.921 |
| 8/16/2011 09:19:01 | 27.159 | 8/10/2011 21:19:01 | 22.984 |
| 8/16/2011 09:59:01 | 28.532 | 8/10/2011 21:59:01 | 22.984 |
| 8/16/2011 10:39:01 | 30.342 | 8/10/2011 22:39:01 | 22.984 |
| 8/16/2011 11:19:01 | 31.340 | 8/10/2011 23:19:01 | 22.984 |

|                    |        |                    |        |
|--------------------|--------|--------------------|--------|
| 8/16/2011 11:59:01 | 32.650 | 8/10/2011 23:59:01 | 22.984 |
| 8/16/2011 12:39:01 | 33.024 | 8/11/2011 00:39:01 | 22.921 |
| 8/16/2011 13:19:01 | 33.149 | 8/11/2011 01:19:01 | 22.921 |
| 8/16/2011 13:59:01 | 33.086 | 8/11/2011 01:59:01 | 22.921 |
| 8/16/2011 14:39:01 | 30.592 | 8/11/2011 02:39:01 | 22.921 |
| 8/16/2011 15:19:01 | 32.775 | 8/11/2011 03:19:01 | 22.859 |
| 8/16/2011 15:59:01 | 30.779 | 8/11/2011 03:59:01 | 22.859 |
| 8/16/2011 16:39:01 | 27.408 | 8/11/2011 04:39:01 | 22.859 |
| 8/16/2011 17:19:01 | 25.409 | 8/11/2011 05:19:01 | 22.796 |
| 8/16/2011 17:59:01 | 23.472 | 8/11/2011 05:59:01 | 22.796 |
| 8/16/2011 18:39:01 | 21.470 | 8/11/2011 06:39:01 | 22.734 |
| 8/16/2011 19:19:01 | 19.906 | 8/11/2011 07:19:01 | 22.734 |
| 8/16/2011 19:59:01 | 19.217 | 8/11/2011 07:59:01 | 22.671 |
| 8/16/2011 20:39:01 | 19.029 | 8/11/2011 08:39:01 | 22.671 |
| 8/16/2011 21:19:01 | 18.842 | 8/11/2011 09:19:01 | 22.609 |
| 8/16/2011 21:59:01 | 18.215 | 8/11/2011 09:59:01 | 22.609 |
| 8/16/2011 22:39:01 | 17.965 | 8/11/2011 10:39:01 | 22.609 |
| 8/16/2011 23:19:01 | 17.652 | 8/11/2011 11:19:01 | 22.546 |
| 8/16/2011 23:59:01 | 17.527 | 8/11/2011 11:59:01 | 22.546 |
| 8/17/2011 00:39:01 | 17.276 | 8/11/2011 12:39:01 | 22.546 |
| 8/17/2011 01:19:01 | 16.775 | 8/11/2011 13:19:01 | 22.546 |
| 8/17/2011 01:59:01 | 16.336 | 8/11/2011 13:59:01 | 22.546 |
| 8/17/2011 02:39:01 | 16.211 | 8/11/2011 14:39:01 | 22.609 |
| 8/17/2011 03:19:01 | 15.333 | 8/11/2011 15:19:01 | 22.609 |
| 8/17/2011 03:59:01 | 14.581 | 8/11/2011 15:59:01 | 22.671 |
| 8/17/2011 04:39:01 | 14.142 | 8/11/2011 16:39:01 | 22.671 |
| 8/17/2011 05:19:01 | 13.703 | 8/11/2011 17:19:01 | 22.734 |
| 8/17/2011 05:59:01 | 13.515 | 8/11/2011 17:59:01 | 22.734 |
| 8/17/2011 06:39:01 | 13.390 | 8/11/2011 18:39:01 | 22.796 |
| 8/17/2011 07:19:01 | 14.895 | 8/11/2011 19:19:01 | 22.796 |
| 8/17/2011 07:59:01 | 17.965 | 8/11/2011 19:59:01 | 22.859 |
| 8/17/2011 08:39:01 | 22.971 | 8/11/2011 20:39:01 | 22.859 |
| 8/17/2011 09:19:01 | 26.971 | 8/11/2011 21:19:01 | 22.859 |
| 8/17/2011 09:59:01 | 28.470 | 8/11/2011 21:59:01 | 22.921 |
| 8/17/2011 10:39:01 | 29.968 | 8/11/2011 22:39:01 | 22.921 |
| 8/17/2011 11:19:01 | 31.715 | 8/11/2011 23:19:01 | 22.921 |
| 8/17/2011 11:59:01 | 33.024 | 8/11/2011 23:59:01 | 22.921 |
| 8/17/2011 12:39:01 | 33.398 | 8/12/2011 00:39:01 | 22.921 |
| 8/17/2011 13:19:01 | 32.338 | 8/12/2011 01:19:01 | 22.921 |
| 8/17/2011 13:59:01 | 31.465 | 8/12/2011 01:59:01 | 22.921 |
| 8/17/2011 14:39:01 | 29.718 | 8/12/2011 02:39:01 | 22.921 |
| 8/17/2011 15:19:01 | 30.841 | 8/12/2011 03:19:01 | 22.859 |
| 8/17/2011 15:59:01 | 31.278 | 8/12/2011 03:59:01 | 22.859 |
| 8/17/2011 16:39:01 | 29.157 | 8/12/2011 04:39:01 | 22.859 |
| 8/17/2011 17:19:01 | 25.972 | 8/12/2011 05:19:01 | 22.859 |
| 8/17/2011 17:59:01 | 23.722 | 8/12/2011 05:59:01 | 22.796 |
| 8/17/2011 18:39:01 | 22.096 | 8/12/2011 06:39:01 | 22.796 |
| 8/17/2011 19:19:01 | 21.095 | 8/12/2011 07:19:01 | 22.796 |
| 8/17/2011 19:59:01 | 20.281 | 8/12/2011 07:59:01 | 22.734 |
| 8/17/2011 20:39:01 | 19.781 | 8/12/2011 08:39:01 | 22.734 |

|                    |        |                    |        |
|--------------------|--------|--------------------|--------|
| 8/17/2011 21:19:01 | 19.280 | 8/12/2011 09:19:01 | 22.734 |
| 8/17/2011 21:59:01 | 18.278 | 8/12/2011 09:59:01 | 22.734 |
| 8/17/2011 22:39:01 | 17.714 | 8/12/2011 10:39:01 | 22.671 |
| 8/17/2011 23:19:01 | 17.401 | 8/12/2011 11:19:01 | 22.671 |
| 8/17/2011 23:59:01 | 16.649 | 8/12/2011 11:59:01 | 22.671 |
| 8/18/2011 00:39:01 | 16.900 | 8/12/2011 12:39:01 | 22.671 |
| 8/18/2011 01:19:01 | 16.775 | 8/12/2011 13:19:01 | 22.671 |
| 8/18/2011 01:59:01 | 16.086 | 8/12/2011 13:59:01 | 22.734 |
| 8/18/2011 02:39:01 | 15.710 | 8/12/2011 14:39:01 | 22.734 |
| 8/18/2011 03:19:01 | 15.083 | 8/12/2011 15:19:01 | 22.734 |
| 8/18/2011 03:59:01 | 14.707 | 8/12/2011 15:59:01 | 22.796 |
| 8/18/2011 04:39:01 | 14.581 | 8/12/2011 16:39:01 | 22.796 |
| 8/18/2011 05:19:01 | 14.330 | 8/12/2011 17:19:01 | 22.859 |
| 8/18/2011 05:59:01 | 13.954 | 8/12/2011 17:59:01 | 22.859 |
| 8/18/2011 06:39:01 | 13.703 | 8/12/2011 18:39:01 | 22.921 |
| 8/18/2011 07:19:01 | 14.957 | 8/12/2011 19:19:01 | 22.921 |
| 8/18/2011 07:59:01 | 18.028 | 8/12/2011 19:59:01 | 22.984 |
| 8/18/2011 08:39:01 | 23.159 | 8/12/2011 20:39:01 | 22.984 |
| 8/18/2011 09:19:01 | 26.159 | 8/12/2011 21:19:01 | 22.984 |
| 8/18/2011 09:59:01 | 27.908 | 8/12/2011 21:59:01 | 23.046 |
| 8/18/2011 10:39:01 | 30.030 | 8/12/2011 22:39:01 | 23.046 |
| 8/18/2011 11:19:01 | 31.340 | 8/12/2011 23:19:01 | 23.046 |
| 8/18/2011 11:59:01 | 32.837 | 8/12/2011 23:59:01 | 23.046 |
| 8/18/2011 12:39:01 | 33.523 | 8/13/2011 00:39:01 | 23.046 |
| 8/18/2011 13:19:01 | 33.211 | 8/13/2011 01:19:01 | 23.046 |
| 8/18/2011 13:59:01 | 33.149 | 8/13/2011 01:59:01 | 23.046 |
| 8/18/2011 14:39:01 | 33.149 | 8/13/2011 02:39:01 | 22.984 |
| 8/18/2011 15:19:01 | 32.463 | 8/13/2011 03:19:01 | 22.984 |
| 8/18/2011 15:59:01 | 31.028 | 8/13/2011 03:59:01 | 22.984 |
| 8/18/2011 16:39:01 | 29.843 | 8/13/2011 04:39:01 | 22.984 |
| 8/18/2011 17:19:01 | 26.721 | 8/13/2011 05:19:01 | 22.984 |
| 8/18/2011 17:59:01 | 25.534 | 8/13/2011 05:59:01 | 22.921 |
| 8/18/2011 18:39:01 | 23.034 | 8/13/2011 06:39:01 | 22.921 |
| 8/18/2011 19:19:01 | 21.658 | 8/13/2011 07:19:01 | 22.921 |
| 8/18/2011 19:59:01 | 20.219 | 8/13/2011 07:59:01 | 22.859 |
| 8/18/2011 20:39:01 | 19.280 | 8/13/2011 08:39:01 | 22.859 |
| 8/18/2011 21:19:01 | 18.529 | 8/13/2011 09:19:01 | 22.859 |
| 8/18/2011 21:59:01 | 18.591 | 8/13/2011 09:59:01 | 22.796 |
| 8/18/2011 22:39:01 | 18.028 | 8/13/2011 10:39:01 | 22.796 |
| 8/18/2011 23:19:01 | 17.339 | 8/13/2011 11:19:01 | 22.796 |
| 8/18/2011 23:59:01 | 16.900 | 8/13/2011 11:59:01 | 22.734 |
| 8/19/2011 00:39:01 | 16.524 | 8/13/2011 12:39:01 | 22.796 |
| 8/19/2011 01:19:01 | 15.898 | 8/13/2011 13:19:01 | 22.796 |
| 8/19/2011 01:59:01 | 15.772 | 8/13/2011 13:59:01 | 22.796 |
| 8/19/2011 02:39:01 | 16.775 | 8/13/2011 14:39:01 | 22.796 |
| 8/19/2011 03:19:01 | 16.649 | 8/13/2011 15:19:01 | 22.859 |
| 8/19/2011 03:59:01 | 16.462 | 8/13/2011 15:59:01 | 22.859 |
| 8/19/2011 04:39:01 | 16.086 | 8/13/2011 16:39:01 | 22.921 |
| 8/19/2011 05:19:01 | 15.835 | 8/13/2011 17:19:01 | 22.921 |
| 8/19/2011 05:59:01 | 15.522 | 8/13/2011 17:59:01 | 22.984 |

|                    |        |                    |        |
|--------------------|--------|--------------------|--------|
| 8/19/2011 06:39:01 | 15.522 | 8/13/2011 18:39:01 | 22.984 |
| 8/19/2011 07:19:01 | 16.336 | 8/13/2011 19:19:01 | 22.984 |
| 8/19/2011 07:59:01 | 19.280 | 8/13/2011 19:59:01 | 23.046 |
| 8/19/2011 08:39:01 | 23.534 | 8/13/2011 20:39:01 | 23.046 |
| 8/19/2011 09:19:01 | 26.721 | 8/13/2011 21:19:01 | 23.046 |
| 8/19/2011 09:59:01 | 28.283 | 8/13/2011 21:59:01 | 23.109 |
| 8/19/2011 10:39:01 | 29.593 | 8/13/2011 22:39:01 | 23.109 |
| 8/19/2011 11:19:01 | 31.465 | 8/13/2011 23:19:01 | 23.109 |
| 8/19/2011 11:59:01 | 32.962 | 8/13/2011 23:59:01 | 23.046 |
| 8/19/2011 12:39:01 | 33.710 | 8/14/2011 00:39:01 | 23.046 |
| 8/19/2011 13:19:01 | 32.401 | 8/14/2011 01:19:01 | 23.046 |
| 8/19/2011 13:59:01 | 31.964 | 8/14/2011 01:59:01 | 23.046 |
| 8/19/2011 14:39:01 | 31.777 | 8/14/2011 02:39:01 | 23.046 |
| 8/19/2011 15:19:01 | 32.213 | 8/14/2011 03:19:01 | 22.984 |
| 8/19/2011 15:59:01 | 32.463 | 8/14/2011 03:59:01 | 22.984 |
| 8/19/2011 16:39:01 | 29.656 | 8/14/2011 04:39:01 | 22.984 |
| 8/19/2011 17:19:01 | 27.471 | 8/14/2011 05:19:01 | 22.984 |
| 8/19/2011 17:59:01 | 25.597 | 8/14/2011 05:59:01 | 22.921 |
| 8/19/2011 18:39:01 | 22.846 | 8/14/2011 06:39:01 | 22.921 |
| 8/19/2011 19:19:01 | 21.032 | 8/14/2011 07:19:01 | 22.921 |
| 8/19/2011 19:59:01 | 20.344 | 8/14/2011 07:59:01 | 22.859 |
| 8/19/2011 20:39:01 | 19.530 | 8/14/2011 08:39:01 | 22.859 |
| 8/19/2011 21:19:01 | 18.967 | 8/14/2011 09:19:01 | 22.796 |
| 8/19/2011 21:59:01 | 18.967 | 8/14/2011 09:59:01 | 22.796 |
| 8/19/2011 22:39:01 | 18.591 | 8/14/2011 10:39:01 | 22.796 |
| 8/19/2011 23:19:01 | 18.278 | 8/14/2011 11:19:01 | 22.734 |
| 8/19/2011 23:59:01 | 18.090 | 8/14/2011 11:59:01 | 22.734 |
| 8/20/2011 00:39:01 | 17.840 | 8/14/2011 12:39:01 | 22.734 |
| 8/20/2011 01:19:01 | 17.464 | 8/14/2011 13:19:01 | 22.734 |
| 8/20/2011 01:59:01 | 17.025 | 8/14/2011 13:59:01 | 22.796 |
| 8/20/2011 02:39:01 | 16.524 | 8/14/2011 14:39:01 | 22.796 |
| 8/20/2011 03:19:01 | 16.336 | 8/14/2011 15:19:01 | 22.796 |
| 8/20/2011 03:59:01 | 16.086 | 8/14/2011 15:59:01 | 22.859 |
| 8/20/2011 04:39:01 | 15.772 | 8/14/2011 16:39:01 | 22.859 |
| 8/20/2011 05:19:01 | 15.333 | 8/14/2011 17:19:01 | 22.921 |
| 8/20/2011 05:59:01 | 14.769 | 8/14/2011 17:59:01 | 22.921 |
| 8/20/2011 06:39:01 | 14.581 | 8/14/2011 18:39:01 | 22.984 |
| 8/20/2011 07:19:01 | 15.835 | 8/14/2011 19:19:01 | 22.984 |
| 8/20/2011 07:59:01 | 19.968 | 8/14/2011 19:59:01 | 22.984 |
| 8/20/2011 08:39:01 | 22.409 | 8/14/2011 20:39:01 | 23.046 |
| 8/20/2011 09:19:01 | 25.847 | 8/14/2011 21:19:01 | 23.046 |
| 8/20/2011 09:59:01 | 28.782 | 8/14/2011 21:59:01 | 23.046 |
| 8/20/2011 10:39:01 | 30.779 | 8/14/2011 22:39:01 | 23.046 |
| 8/20/2011 11:19:01 | 32.463 | 8/14/2011 23:19:01 | 23.046 |
| 8/20/2011 11:59:01 | 33.149 | 8/14/2011 23:59:01 | 23.046 |
| 8/20/2011 12:39:01 | 33.398 | 8/15/2011 00:39:01 | 23.046 |
| 8/20/2011 13:19:01 | 34.021 | 8/15/2011 01:19:01 | 23.046 |
| 8/20/2011 13:59:01 | 33.647 | 8/15/2011 01:59:01 | 23.046 |
| 8/20/2011 14:39:01 | 30.592 | 8/15/2011 02:39:01 | 22.984 |
| 8/20/2011 15:19:01 | 30.717 | 8/15/2011 03:19:01 | 22.984 |

|                    |        |                    |        |
|--------------------|--------|--------------------|--------|
| 8/20/2011 15:59:01 | 31.902 | 8/15/2011 03:59:01 | 22.984 |
| 8/20/2011 16:39:01 | 28.720 | 8/15/2011 04:39:01 | 22.984 |
| 8/20/2011 17:19:01 | 25.472 | 8/15/2011 05:19:01 | 22.984 |
| 8/20/2011 17:59:01 | 22.909 | 8/15/2011 05:59:01 | 22.921 |
| 8/20/2011 18:39:01 | 20.907 | 8/15/2011 06:39:01 | 22.921 |
| 8/20/2011 19:19:01 | 19.906 | 8/15/2011 07:19:01 | 22.921 |
| 8/20/2011 19:59:01 | 19.906 | 8/15/2011 07:59:01 | 22.859 |
| 8/20/2011 20:39:01 | 19.468 | 8/15/2011 08:39:01 | 22.859 |
| 8/20/2011 21:19:01 | 19.155 | 8/15/2011 09:19:01 | 22.859 |
| 8/20/2011 21:59:01 | 19.155 | 8/15/2011 09:59:01 | 22.796 |
| 8/20/2011 22:39:01 | 18.591 | 8/15/2011 10:39:01 | 22.796 |
| 8/20/2011 23:19:01 | 17.965 | 8/15/2011 11:19:01 | 22.796 |
| 8/20/2011 23:59:01 | 17.902 | 8/15/2011 11:59:01 | 22.796 |
| 8/21/2011 00:39:01 | 17.276 | 8/15/2011 12:39:01 | 22.796 |
| 8/21/2011 01:19:01 | 16.837 | 8/15/2011 13:19:01 | 22.796 |
| 8/21/2011 01:59:01 | 16.023 | 8/15/2011 13:59:01 | 22.796 |
| 8/21/2011 02:39:01 | 15.145 | 8/15/2011 14:39:01 | 22.796 |
| 8/21/2011 03:19:01 | 14.769 | 8/15/2011 15:19:01 | 22.859 |
| 8/21/2011 03:59:01 | 14.769 | 8/15/2011 15:59:01 | 22.859 |
| 8/21/2011 04:39:01 | 14.268 | 8/15/2011 16:39:01 | 22.859 |
| 8/21/2011 05:19:01 | 14.080 | 8/15/2011 17:19:01 | 22.921 |
| 8/21/2011 05:59:01 | 14.017 | 8/15/2011 17:59:01 | 22.921 |
| 8/21/2011 06:39:01 | 14.142 | 8/15/2011 18:39:01 | 22.984 |
| 8/21/2011 07:19:01 | 15.898 | 8/15/2011 19:19:01 | 22.984 |
| 8/21/2011 07:59:01 | 19.843 | 8/15/2011 19:59:01 | 22.984 |
| 8/21/2011 08:39:01 | 24.784 | 8/15/2011 20:39:01 | 23.046 |
| 8/21/2011 09:19:01 | 28.283 | 8/15/2011 21:19:01 | 23.046 |
| 8/21/2011 09:59:01 | 29.656 | 8/15/2011 21:59:01 | 23.046 |
| 8/21/2011 10:39:01 | 31.278 | 8/15/2011 22:39:01 | 23.046 |
| 8/21/2011 11:19:01 | 30.904 | 8/15/2011 23:19:01 | 23.046 |
| 8/21/2011 11:59:01 | 32.650 | 8/15/2011 23:59:01 | 23.046 |
| 8/21/2011 12:39:01 | 33.460 | 8/16/2011 00:39:01 | 23.046 |
| 8/21/2011 13:19:01 | 33.024 | 8/16/2011 01:19:01 | 22.984 |
| 8/21/2011 13:59:01 | 34.271 | 8/16/2011 01:59:01 | 22.984 |
| 8/21/2011 14:39:01 | 34.769 | 8/16/2011 02:39:01 | 22.984 |
| 8/21/2011 15:19:01 | 34.458 | 8/16/2011 03:19:01 | 22.984 |
| 8/21/2011 15:59:01 | 33.024 | 8/16/2011 03:59:01 | 22.921 |
| 8/21/2011 16:39:01 | 30.654 | 8/16/2011 04:39:01 | 22.921 |
| 8/21/2011 17:19:01 | 28.095 | 8/16/2011 05:19:01 | 22.859 |
| 8/21/2011 17:59:01 | 26.034 | 8/16/2011 05:59:01 | 22.859 |
| 8/21/2011 18:39:01 | 24.784 | 8/16/2011 06:39:01 | 22.859 |
| 8/21/2011 19:19:01 | 24.409 | 8/16/2011 07:19:01 | 22.796 |
| 8/21/2011 19:59:01 | 24.034 | 8/16/2011 07:59:01 | 22.796 |
| 8/21/2011 20:39:01 | 24.097 | 8/16/2011 08:39:01 | 22.734 |
| 8/21/2011 21:19:01 | 23.847 | 8/16/2011 09:19:01 | 22.734 |
| 8/21/2011 21:59:01 | 23.347 | 8/16/2011 09:59:01 | 22.734 |
| 8/21/2011 22:39:01 | 22.534 | 8/16/2011 10:39:01 | 22.671 |
| 8/21/2011 23:19:01 | 21.095 | 8/16/2011 11:19:01 | 22.671 |
| 8/21/2011 23:59:01 | 20.281 | 8/16/2011 11:59:01 | 22.671 |
| 8/22/2011 00:39:01 | 20.281 | 8/16/2011 12:39:01 | 22.671 |

|                    |        |                    |        |
|--------------------|--------|--------------------|--------|
| 8/22/2011 01:19:01 | 19.718 | 8/16/2011 13:19:01 | 22.671 |
| 8/22/2011 01:59:01 | 18.967 | 8/16/2011 13:59:01 | 22.671 |
| 8/22/2011 02:39:01 | 17.965 | 8/16/2011 14:39:01 | 22.734 |
| 8/22/2011 03:19:01 | 17.276 | 8/16/2011 15:19:01 | 22.734 |
| 8/22/2011 03:59:01 | 17.339 | 8/16/2011 15:59:01 | 22.796 |
| 8/22/2011 04:39:01 | 16.211 | 8/16/2011 16:39:01 | 22.796 |
| 8/22/2011 05:19:01 | 15.522 | 8/16/2011 17:19:01 | 22.859 |
| 8/22/2011 05:59:01 | 15.772 | 8/16/2011 17:59:01 | 22.859 |
| 8/22/2011 06:39:01 | 15.772 | 8/16/2011 18:39:01 | 22.921 |
| 8/22/2011 07:19:01 | 17.840 | 8/16/2011 19:19:01 | 22.921 |
| 8/22/2011 07:59:01 | 22.096 | 8/16/2011 19:59:01 | 22.921 |
| 8/22/2011 08:39:01 | 25.034 | 8/16/2011 20:39:01 | 22.984 |
| 8/22/2011 09:19:01 | 26.596 | 8/16/2011 21:19:01 | 22.984 |
| 8/22/2011 09:59:01 | 28.720 | 8/16/2011 21:59:01 | 22.984 |
| 8/22/2011 10:39:01 | 30.904 | 8/16/2011 22:39:01 | 22.984 |
| 8/22/2011 11:19:01 | 32.650 | 8/16/2011 23:19:01 | 22.984 |
| 8/22/2011 11:59:01 | 33.273 | 8/16/2011 23:59:01 | 22.984 |
| 8/22/2011 12:39:01 | 33.211 | 8/17/2011 00:39:01 | 22.984 |
| 8/22/2011 13:19:01 | 31.964 | 8/17/2011 01:19:01 | 22.984 |
| 8/22/2011 13:59:01 | 33.647 | 8/17/2011 01:59:01 | 22.984 |
| 8/22/2011 14:39:01 | 33.959 | 8/17/2011 02:39:01 | 22.984 |
| 8/22/2011 15:19:01 | 34.520 | 8/17/2011 03:19:01 | 22.984 |
| 8/22/2011 15:59:01 | 33.024 | 8/17/2011 03:59:01 | 22.921 |
| 8/22/2011 16:39:01 | 31.590 | 8/17/2011 04:39:01 | 22.921 |
| 8/22/2011 17:19:01 | 29.781 | 8/17/2011 05:19:01 | 22.921 |
| 8/22/2011 17:59:01 | 28.283 | 8/17/2011 05:59:01 | 22.921 |
| 8/22/2011 18:39:01 | 27.159 | 8/17/2011 06:39:01 | 22.859 |
| 8/22/2011 19:19:01 | 26.721 | 8/17/2011 07:19:01 | 22.859 |
| 8/22/2011 19:59:01 | 26.347 | 8/17/2011 07:59:01 | 22.796 |
| 8/22/2011 20:39:01 | 25.597 | 8/17/2011 08:39:01 | 22.796 |
| 8/22/2011 21:19:01 | 24.472 | 8/17/2011 09:19:01 | 22.734 |
| 8/22/2011 21:59:01 | 24.159 | 8/17/2011 09:59:01 | 22.734 |
| 8/22/2011 22:39:01 | 24.347 | 8/17/2011 10:39:01 | 22.671 |
| 8/22/2011 23:19:01 | 23.847 | 8/17/2011 11:19:01 | 22.671 |
| 8/22/2011 23:59:01 | 22.971 | 8/17/2011 11:59:01 | 22.671 |
| 8/23/2011 00:39:01 | 22.409 | 8/17/2011 12:39:01 | 22.671 |
| 8/23/2011 01:19:01 | 21.533 | 8/17/2011 13:19:01 | 22.671 |
| 8/23/2011 01:59:01 | 20.907 | 8/17/2011 13:59:01 | 22.671 |
| 8/23/2011 02:39:01 | 19.781 | 8/17/2011 14:39:01 | 22.671 |
| 8/23/2011 03:19:01 | 19.029 | 8/17/2011 15:19:01 | 22.734 |
| 8/23/2011 03:59:01 | 18.278 | 8/17/2011 15:59:01 | 22.734 |
| 8/23/2011 04:39:01 | 17.652 | 8/17/2011 16:39:01 | 22.796 |
| 8/23/2011 05:19:01 | 16.900 | 8/17/2011 17:19:01 | 22.859 |
| 8/23/2011 05:59:01 | 16.336 | 8/17/2011 17:59:01 | 22.859 |
| 8/23/2011 06:39:01 | 16.336 | 8/17/2011 18:39:01 | 22.921 |
| 8/23/2011 07:19:01 | 18.466 | 8/17/2011 19:19:01 | 22.921 |
| 8/23/2011 07:59:01 | 23.284 | 8/17/2011 19:59:01 | 22.984 |
| 8/23/2011 08:39:01 | 26.472 | 8/17/2011 20:39:01 | 22.984 |
| 8/23/2011 09:19:01 | 28.657 | 8/17/2011 21:19:01 | 22.984 |
| 8/23/2011 09:59:01 | 29.718 | 8/17/2011 21:59:01 | 23.046 |



|                    |        |                    |        |
|--------------------|--------|--------------------|--------|
| 8/23/2011 10:39:01 | 31.091 | 8/17/2011 22:39:01 | 23.046 |
| 8/23/2011 11:19:01 | 32.525 | 8/17/2011 23:19:01 | 23.046 |
| 8/23/2011 11:59:01 | 33.149 | 8/17/2011 23:59:01 | 23.046 |
| 8/23/2011 12:39:01 | 34.146 | 8/18/2011 00:39:01 | 23.046 |
| 8/23/2011 13:19:01 | 34.831 | 8/18/2011 01:19:01 | 23.046 |
| 8/23/2011 13:59:01 | 35.268 | 8/18/2011 01:59:01 | 23.046 |
| 8/23/2011 14:39:01 | 35.081 | 8/18/2011 02:39:01 | 22.984 |
| 8/23/2011 15:19:01 | 35.268 | 8/18/2011 03:19:01 | 22.984 |
| 8/23/2011 15:59:01 | 33.460 | 8/18/2011 03:59:01 | 22.984 |
| 8/23/2011 16:39:01 | 32.525 | 8/18/2011 04:39:01 | 22.921 |
| 8/23/2011 17:19:01 | 29.905 | 8/18/2011 05:19:01 | 22.921 |
| 8/23/2011 17:59:01 | 27.658 | 8/18/2011 05:59:01 | 22.921 |
| 8/23/2011 18:39:01 | 24.847 | 8/18/2011 06:39:01 | 22.859 |
| 8/23/2011 19:19:01 | 23.472 | 8/18/2011 07:19:01 | 22.859 |
| 8/23/2011 19:59:01 | 22.721 | 8/18/2011 07:59:01 | 22.796 |
| 8/23/2011 20:39:01 | 23.034 | 8/18/2011 08:39:01 | 22.796 |
| 8/23/2011 21:19:01 | 21.658 | 8/18/2011 09:19:01 | 22.734 |
| 8/23/2011 21:59:01 | 21.971 | 8/18/2011 09:59:01 | 22.734 |
| 8/23/2011 22:39:01 | 21.846 | 8/18/2011 10:39:01 | 22.671 |
| 8/23/2011 23:19:01 | 21.095 | 8/18/2011 11:19:01 | 22.671 |
| 8/23/2011 23:59:01 | 19.718 | 8/18/2011 11:59:01 | 22.671 |
| 8/24/2011 00:39:01 | 19.405 | 8/18/2011 12:39:01 | 22.671 |
| 8/24/2011 01:19:01 | 18.215 | 8/18/2011 13:19:01 | 22.671 |
| 8/24/2011 01:59:01 | 16.837 | 8/18/2011 13:59:01 | 22.671 |
| 8/24/2011 02:39:01 | 15.710 | 8/18/2011 14:39:01 | 22.734 |
| 8/24/2011 03:19:01 | 15.396 | 8/18/2011 15:19:01 | 22.734 |
| 8/24/2011 03:59:01 | 14.895 | 8/18/2011 15:59:01 | 22.796 |
| 8/24/2011 04:39:01 | 15.647 | 8/18/2011 16:39:01 | 22.796 |
| 8/24/2011 05:19:01 | 15.083 | 8/18/2011 17:19:01 | 22.859 |
| 8/24/2011 05:59:01 | 14.330 | 8/18/2011 17:59:01 | 22.859 |
| 8/24/2011 06:39:01 | 14.017 | 8/18/2011 18:39:01 | 22.921 |
| 8/24/2011 07:19:01 | 15.522 | 8/18/2011 19:19:01 | 22.921 |
| 8/24/2011 07:59:01 | 19.593 | 8/18/2011 19:59:01 | 22.984 |
| 8/24/2011 08:39:01 | 24.847 | 8/18/2011 20:39:01 | 22.984 |
| 8/24/2011 09:19:01 | 27.846 | 8/18/2011 21:19:01 | 23.046 |
| 8/24/2011 09:59:01 | 29.219 | 8/18/2011 21:59:01 | 23.046 |
| 8/24/2011 10:39:01 | 30.592 | 8/18/2011 22:39:01 | 23.046 |
| 8/24/2011 11:19:01 | 31.902 | 8/18/2011 23:19:01 | 23.046 |
| 8/24/2011 11:59:01 | 32.338 | 8/18/2011 23:59:01 | 23.046 |
| 8/24/2011 12:39:01 | 33.024 | 8/19/2011 00:39:01 | 23.046 |
| 8/24/2011 13:19:01 | 33.647 | 8/19/2011 01:19:01 | 23.046 |
| 8/24/2011 13:59:01 | 34.084 | 8/19/2011 01:59:01 | 23.046 |
| 8/24/2011 14:39:01 | 34.084 | 8/19/2011 02:39:01 | 23.046 |
| 8/24/2011 15:19:01 | 34.146 | 8/19/2011 03:19:01 | 22.984 |
| 8/24/2011 15:59:01 | 32.151 | 8/19/2011 03:59:01 | 22.984 |
| 8/24/2011 16:39:01 | 30.904 | 8/19/2011 04:39:01 | 22.984 |
| 8/24/2011 17:19:01 | 28.532 | 8/19/2011 05:19:01 | 22.921 |
| 8/24/2011 17:59:01 | 25.472 | 8/19/2011 05:59:01 | 22.921 |
| 8/24/2011 18:39:01 | 22.846 | 8/19/2011 06:39:01 | 22.859 |
| 8/24/2011 19:19:01 | 22.409 | 8/19/2011 07:19:01 | 22.859 |

|                    |        |                    |        |
|--------------------|--------|--------------------|--------|
| 8/24/2011 19:59:01 | 21.721 | 8/19/2011 07:59:01 | 22.859 |
| 8/24/2011 20:39:01 | 20.407 | 8/19/2011 08:39:01 | 22.796 |
| 8/24/2011 21:19:01 | 19.468 | 8/19/2011 09:19:01 | 22.796 |
| 8/24/2011 21:59:01 | 21.345 | 8/19/2011 09:59:01 | 22.796 |
| 8/24/2011 22:39:01 | 21.095 | 8/19/2011 10:39:01 | 22.734 |
| 8/24/2011 23:19:01 | 20.907 | 8/19/2011 11:19:01 | 22.734 |
| 8/24/2011 23:59:01 | 19.781 | 8/19/2011 11:59:01 | 22.734 |
| 8/25/2011 00:39:01 | 18.842 | 8/19/2011 12:39:01 | 22.734 |
| 8/25/2011 01:19:01 | 17.464 | 8/19/2011 13:19:01 | 22.734 |
| 8/25/2011 01:59:01 | 16.086 | 8/19/2011 13:59:01 | 22.734 |
| 8/25/2011 02:39:01 | 15.020 | 8/19/2011 14:39:01 | 22.734 |
| 8/25/2011 03:19:01 | 14.142 | 8/19/2011 15:19:01 | 22.796 |
| 8/25/2011 03:59:01 | 13.327 | 8/19/2011 15:59:01 | 22.796 |
| 8/25/2011 04:39:01 | 13.139 | 8/19/2011 16:39:01 | 22.859 |
| 8/25/2011 05:19:01 | 12.763 | 8/19/2011 17:19:01 | 22.859 |
| 8/25/2011 05:59:01 | 12.825 | 8/19/2011 17:59:01 | 22.921 |
| 8/25/2011 06:39:01 | 13.578 | 8/19/2011 18:39:01 | 22.984 |
| 8/25/2011 07:19:01 | 17.276 | 8/19/2011 19:19:01 | 22.984 |
| 8/25/2011 07:59:01 | 21.095 | 8/19/2011 19:59:01 | 23.046 |
| 8/25/2011 08:39:01 | 24.097 | 8/19/2011 20:39:01 | 23.046 |
| 8/25/2011 09:19:01 | 26.721 | 8/19/2011 21:19:01 | 23.046 |
| 8/25/2011 09:59:01 | 28.033 | 8/19/2011 21:59:01 | 23.109 |
| 8/25/2011 10:39:01 | 29.781 | 8/19/2011 22:39:01 | 23.109 |
| 8/25/2011 11:19:01 | 30.405 | 8/19/2011 23:19:01 | 23.109 |
| 8/25/2011 11:59:01 | 31.278 | 8/19/2011 23:59:01 | 23.109 |
| 8/25/2011 12:39:01 | 31.839 | 8/20/2011 00:39:01 | 23.109 |
| 8/25/2011 13:19:01 | 32.463 | 8/20/2011 01:19:01 | 23.109 |
| 8/25/2011 13:59:01 | 33.024 | 8/20/2011 01:59:01 | 23.109 |
| 8/25/2011 14:39:01 | 33.024 | 8/20/2011 02:39:01 | 23.109 |
| 8/25/2011 15:19:01 | 33.024 | 8/20/2011 03:19:01 | 23.046 |
| 8/25/2011 15:59:01 | 31.153 | 8/20/2011 03:59:01 | 23.046 |
| 8/25/2011 16:39:01 | 29.157 | 8/20/2011 04:39:01 | 23.046 |
| 8/25/2011 17:19:01 | 26.409 | 8/20/2011 05:19:01 | 22.984 |
| 8/25/2011 17:59:01 | 23.784 | 8/20/2011 05:59:01 | 22.984 |
| 8/25/2011 18:39:01 | 21.220 | 8/20/2011 06:39:01 | 22.984 |
| 8/25/2011 19:19:01 | 19.405 | 8/20/2011 07:19:01 | 22.921 |
| 8/25/2011 19:59:01 | 18.090 | 8/20/2011 07:59:01 | 22.921 |
| 8/25/2011 20:39:01 | 17.151 | 8/20/2011 08:39:01 | 22.921 |
| 8/25/2011 21:19:01 | 16.274 | 8/20/2011 09:19:01 | 22.859 |
| 8/25/2011 21:59:01 | 15.584 | 8/20/2011 09:59:01 | 22.859 |
| 8/25/2011 22:39:01 | 15.271 | 8/20/2011 10:39:01 | 22.796 |
| 8/25/2011 23:19:01 | 14.581 | 8/20/2011 11:19:01 | 22.796 |
| 8/25/2011 23:59:01 | 14.142 | 8/20/2011 11:59:01 | 22.796 |
| 8/26/2011 00:39:01 | 13.766 | 8/20/2011 12:39:01 | 22.796 |
| 8/26/2011 01:19:01 | 13.390 | 8/20/2011 13:19:01 | 22.796 |
| 8/26/2011 01:59:01 | 13.139 | 8/20/2011 13:59:01 | 22.796 |
| 8/26/2011 02:39:01 | 12.951 | 8/20/2011 14:39:01 | 22.859 |
| 8/26/2011 03:19:01 | 12.825 | 8/20/2011 15:19:01 | 22.859 |
| 8/26/2011 03:59:01 | 12.574 | 8/20/2011 15:59:01 | 22.859 |
| 8/26/2011 04:39:01 | 12.449 | 8/20/2011 16:39:01 | 22.921 |

|                    |        |                    |        |
|--------------------|--------|--------------------|--------|
| 8/26/2011 05:19:01 | 12.574 | 8/20/2011 17:19:01 | 22.921 |
| 8/26/2011 05:59:01 | 12.574 | 8/20/2011 17:59:01 | 22.984 |
| 8/26/2011 06:39:01 | 12.637 | 8/20/2011 18:39:01 | 22.984 |
| 8/26/2011 07:19:01 | 14.519 | 8/20/2011 19:19:01 | 23.046 |
| 8/26/2011 07:59:01 | 19.029 | 8/20/2011 19:59:01 | 23.046 |
| 8/26/2011 08:39:01 | 24.034 | 8/20/2011 20:39:01 | 23.046 |
| 8/26/2011 09:19:01 | 26.971 | 8/20/2011 21:19:01 | 23.046 |
| 8/26/2011 09:59:01 | 28.470 | 8/20/2011 21:59:01 | 23.109 |
| 8/26/2011 10:39:01 | 30.217 | 8/20/2011 22:39:01 | 23.109 |
| 8/26/2011 11:19:01 | 31.403 | 8/20/2011 23:19:01 | 23.109 |
| 8/26/2011 11:59:01 | 32.463 | 8/20/2011 23:59:01 | 23.109 |
| 8/26/2011 12:39:01 | 33.024 | 8/21/2011 00:39:01 | 23.046 |
| 8/26/2011 13:19:01 | 33.647 | 8/21/2011 01:19:01 | 23.046 |
| 8/26/2011 13:59:01 | 34.084 | 8/21/2011 01:59:01 | 23.046 |
| 8/26/2011 14:39:01 | 34.084 | 8/21/2011 02:39:01 | 23.046 |
| 8/26/2011 15:19:01 | 34.333 | 8/21/2011 03:19:01 | 23.046 |
| 8/26/2011 15:59:01 | 30.342 | 8/21/2011 03:59:01 | 23.046 |
| 8/26/2011 16:39:01 | 29.593 | 8/21/2011 04:39:01 | 22.984 |
| 8/26/2011 17:19:01 | 27.159 | 8/21/2011 05:19:01 | 22.984 |
| 8/26/2011 17:59:01 | 24.597 | 8/21/2011 05:59:01 | 22.921 |
| 8/26/2011 18:39:01 | 21.971 | 8/21/2011 06:39:01 | 22.921 |
| 8/26/2011 19:19:01 | 20.281 | 8/21/2011 07:19:01 | 22.921 |
| 8/26/2011 19:59:01 | 19.468 | 8/21/2011 07:59:01 | 22.859 |
| 8/26/2011 20:39:01 | 19.280 | 8/21/2011 08:39:01 | 22.859 |
| 8/26/2011 21:19:01 | 19.155 | 8/21/2011 09:19:01 | 22.796 |
| 8/26/2011 21:59:01 | 18.967 | 8/21/2011 09:59:01 | 22.796 |
| 8/26/2011 22:39:01 | 18.779 | 8/21/2011 10:39:01 | 22.734 |
| 8/26/2011 23:19:01 | 18.215 | 8/21/2011 11:19:01 | 22.734 |
| 8/26/2011 23:59:01 | 17.589 | 8/21/2011 11:59:01 | 22.734 |
| 8/27/2011 00:39:01 | 18.341 | 8/21/2011 12:39:01 | 22.734 |
| 8/27/2011 01:19:01 | 18.153 | 8/21/2011 13:19:01 | 22.734 |
| 8/27/2011 01:59:01 | 17.840 | 8/21/2011 13:59:01 | 22.734 |
| 8/27/2011 02:39:01 | 17.527 | 8/21/2011 14:39:01 | 22.796 |
| 8/27/2011 03:19:01 | 17.527 | 8/21/2011 15:19:01 | 22.796 |
| 8/27/2011 03:59:01 | 17.464 | 8/21/2011 15:59:01 | 22.859 |
| 8/27/2011 04:39:01 | 17.464 | 8/21/2011 16:39:01 | 22.859 |
| 8/27/2011 05:19:01 | 16.900 | 8/21/2011 17:19:01 | 22.921 |
| 8/27/2011 05:59:01 | 16.649 | 8/21/2011 17:59:01 | 22.984 |
| 8/27/2011 06:39:01 | 16.086 | 8/21/2011 18:39:01 | 22.984 |
| 8/27/2011 07:19:01 | 18.341 | 8/21/2011 19:19:01 | 23.046 |
| 8/27/2011 07:59:01 | 22.221 | 8/21/2011 19:59:01 | 23.046 |
| 8/27/2011 08:39:01 | 25.159 | 8/21/2011 20:39:01 | 23.109 |
| 8/27/2011 09:19:01 | 27.846 | 8/21/2011 21:19:01 | 23.109 |
| 8/27/2011 09:59:01 | 29.094 | 8/21/2011 21:59:01 | 23.109 |
| 8/27/2011 10:39:01 | 31.278 | 8/21/2011 22:39:01 | 23.171 |
| 8/27/2011 11:19:01 | 32.276 | 8/21/2011 23:19:01 | 23.171 |
| 8/27/2011 11:59:01 | 32.775 | 8/21/2011 23:59:01 | 23.171 |
| 8/27/2011 12:39:01 | 33.585 | 8/22/2011 00:39:01 | 23.171 |
| 8/27/2011 13:19:01 | 34.582 | 8/22/2011 01:19:01 | 23.171 |
| 8/27/2011 13:59:01 | 34.582 | 8/22/2011 01:59:01 | 23.234 |

|                    |        |                    |        |
|--------------------|--------|--------------------|--------|
| 8/27/2011 14:39:01 | 34.894 | 8/22/2011 02:39:01 | 23.234 |
| 8/27/2011 15:19:01 | 33.336 | 8/22/2011 03:19:01 | 23.234 |
| 8/27/2011 15:59:01 | 32.588 | 8/22/2011 03:59:01 | 23.171 |
| 8/27/2011 16:39:01 | 30.904 | 8/22/2011 04:39:01 | 23.171 |
| 8/27/2011 17:19:01 | 28.033 | 8/22/2011 05:19:01 | 23.171 |
| 8/27/2011 17:59:01 | 25.597 | 8/22/2011 05:59:01 | 23.171 |
| 8/27/2011 18:39:01 | 22.846 | 8/22/2011 06:39:01 | 23.171 |
| 8/27/2011 19:19:01 | 21.032 | 8/22/2011 07:19:01 | 23.171 |
| 8/27/2011 19:59:01 | 19.593 | 8/22/2011 07:59:01 | 23.109 |
| 8/27/2011 20:39:01 | 19.280 | 8/22/2011 08:39:01 | 23.109 |
| 8/27/2011 21:19:01 | 22.846 | 8/22/2011 09:19:01 | 23.046 |
| 8/27/2011 21:59:01 | 21.908 | 8/22/2011 09:59:01 | 23.046 |
| 8/27/2011 22:39:01 | 21.345 | 8/22/2011 10:39:01 | 22.984 |
| 8/27/2011 23:19:01 | 20.907 | 8/22/2011 11:19:01 | 22.984 |
| 8/27/2011 23:59:01 | 19.968 | 8/22/2011 11:59:01 | 22.984 |
| 8/28/2011 00:39:01 | 18.967 | 8/22/2011 12:39:01 | 22.984 |
| 8/28/2011 01:19:01 | 18.215 | 8/22/2011 13:19:01 | 22.984 |
| 8/28/2011 01:59:01 | 17.589 | 8/22/2011 13:59:01 | 22.984 |
| 8/28/2011 02:39:01 | 16.775 | 8/22/2011 14:39:01 | 22.984 |
| 8/28/2011 03:19:01 | 16.148 | 8/22/2011 15:19:01 | 23.046 |
| 8/28/2011 03:59:01 | 15.459 | 8/22/2011 15:59:01 | 23.046 |
| 8/28/2011 04:39:01 | 14.957 | 8/22/2011 16:39:01 | 23.109 |
| 8/28/2011 05:19:01 | 14.456 | 8/22/2011 17:19:01 | 23.109 |
| 8/28/2011 05:59:01 | 14.080 | 8/22/2011 17:59:01 | 23.171 |
| 8/28/2011 06:39:01 | 14.205 | 8/22/2011 18:39:01 | 23.171 |
| 8/28/2011 07:19:01 | 16.148 | 8/22/2011 19:19:01 | 23.234 |
| 8/28/2011 07:59:01 | 20.657 | 8/22/2011 19:59:01 | 23.234 |
| 8/28/2011 08:39:01 | 25.097 | 8/22/2011 20:39:01 | 23.234 |
| 8/28/2011 09:19:01 | 28.220 | 8/22/2011 21:19:01 | 23.296 |
| 8/28/2011 09:59:01 | 29.406 | 8/22/2011 21:59:01 | 23.296 |
| 8/28/2011 10:39:01 | 30.405 | 8/22/2011 22:39:01 | 23.359 |
| 8/28/2011 11:19:01 | 31.652 | 8/22/2011 23:19:01 | 23.359 |
| 8/28/2011 11:59:01 | 32.338 | 8/22/2011 23:59:01 | 23.359 |
| 8/28/2011 12:39:01 | 33.149 | 8/23/2011 00:39:01 | 23.359 |
| 8/28/2011 13:19:01 | 34.146 | 8/23/2011 01:19:01 | 23.359 |
| 8/28/2011 13:59:01 | 34.395 | 8/23/2011 01:59:01 | 23.359 |
| 8/28/2011 14:39:01 | 34.707 | 8/23/2011 02:39:01 | 23.359 |
| 8/28/2011 15:19:01 | 34.831 | 8/23/2011 03:19:01 | 23.359 |
| 8/28/2011 15:59:01 | 32.650 | 8/23/2011 03:59:01 | 23.359 |
| 8/28/2011 16:39:01 | 30.779 | 8/23/2011 04:39:01 | 23.359 |
| 8/28/2011 17:19:01 | 27.846 | 8/23/2011 05:19:01 | 23.359 |
| 8/28/2011 17:59:01 | 25.222 | 8/23/2011 05:59:01 | 23.359 |
| 8/28/2011 18:39:01 | 22.784 | 8/23/2011 06:39:01 | 23.359 |
| 8/28/2011 19:19:01 | 20.970 | 8/23/2011 07:19:01 | 23.359 |
| 8/28/2011 19:59:01 | 19.656 | 8/23/2011 07:59:01 | 23.296 |
| 8/28/2011 20:39:01 | 19.092 | 8/23/2011 08:39:01 | 23.296 |
| 8/28/2011 21:19:01 | 19.280 | 8/23/2011 09:19:01 | 23.234 |
| 8/28/2011 21:59:01 | 20.281 | 8/23/2011 09:59:01 | 23.234 |
| 8/28/2011 22:39:01 | 19.593 | 8/23/2011 10:39:01 | 23.234 |
| 8/28/2011 23:19:01 | 18.716 | 8/23/2011 11:19:01 | 23.171 |

|                    |        |                    |        |
|--------------------|--------|--------------------|--------|
| 8/28/2011 23:59:01 | 17.965 | 8/23/2011 11:59:01 | 23.171 |
| 8/29/2011 00:39:01 | 17.213 | 8/23/2011 12:39:01 | 23.171 |
| 8/29/2011 01:19:01 | 16.587 | 8/23/2011 13:19:01 | 23.171 |
| 8/29/2011 01:59:01 | 16.211 | 8/23/2011 13:59:01 | 23.171 |
| 8/29/2011 02:39:01 | 16.274 | 8/23/2011 14:39:01 | 23.234 |
| 8/29/2011 03:19:01 | 16.712 | 8/23/2011 15:19:01 | 23.234 |
| 8/29/2011 03:59:01 | 16.399 | 8/23/2011 15:59:01 | 23.234 |
| 8/29/2011 04:39:01 | 16.211 | 8/23/2011 16:39:01 | 23.296 |
| 8/29/2011 05:19:01 | 15.772 | 8/23/2011 17:19:01 | 23.296 |
| 8/29/2011 05:59:01 | 15.647 | 8/23/2011 17:59:01 | 23.359 |
| 8/29/2011 06:39:01 | 16.399 | 8/23/2011 18:39:01 | 23.359 |
| 8/29/2011 07:19:01 | 19.155 | 8/23/2011 19:19:01 | 23.359 |
| 8/29/2011 07:59:01 | 22.721 | 8/23/2011 19:59:01 | 23.421 |
| 8/29/2011 08:39:01 | 25.222 | 8/23/2011 20:39:01 | 23.421 |
| 8/29/2011 09:19:01 | 27.783 | 8/23/2011 21:19:01 | 23.421 |
| 8/29/2011 09:59:01 | 29.843 | 8/23/2011 21:59:01 | 23.484 |
| 8/29/2011 10:39:01 | 31.216 | 8/23/2011 22:39:01 | 23.484 |
| 8/29/2011 11:19:01 | 32.650 | 8/23/2011 23:19:01 | 23.484 |
| 8/29/2011 11:59:01 | 33.460 | 8/23/2011 23:59:01 | 23.484 |
| 8/29/2011 12:39:01 | 34.208 | 8/24/2011 00:39:01 | 23.484 |
| 8/29/2011 13:19:01 | 34.707 | 8/24/2011 01:19:01 | 23.484 |
| 8/29/2011 13:59:01 | 34.894 | 8/24/2011 01:59:01 | 23.484 |
| 8/29/2011 14:39:01 | 34.831 | 8/24/2011 02:39:01 | 23.421 |
| 8/29/2011 15:19:01 | 34.894 | 8/24/2011 03:19:01 | 23.421 |
| 8/29/2011 15:59:01 | 33.024 | 8/24/2011 03:59:01 | 23.421 |
| 8/29/2011 16:39:01 | 31.465 | 8/24/2011 04:39:01 | 23.359 |
| 8/29/2011 17:19:01 | 28.158 | 8/24/2011 05:19:01 | 23.359 |
| 8/29/2011 17:59:01 | 25.347 | 8/24/2011 05:59:01 | 23.359 |
| 8/29/2011 18:39:01 | 22.784 | 8/24/2011 06:39:01 | 23.359 |
| 8/29/2011 19:19:01 | 20.907 | 8/24/2011 07:19:01 | 23.296 |
| 8/29/2011 19:59:01 | 20.719 | 8/24/2011 07:59:01 | 23.296 |
| 8/29/2011 20:39:01 | 20.469 | 8/24/2011 08:39:01 | 23.234 |
| 8/29/2011 21:19:01 | 19.405 | 8/24/2011 09:19:01 | 23.234 |
| 8/29/2011 21:59:01 | 18.529 | 8/24/2011 09:59:01 | 23.171 |
| 8/29/2011 22:39:01 | 18.090 | 8/24/2011 10:39:01 | 23.171 |
| 8/29/2011 23:19:01 | 17.527 | 8/24/2011 11:19:01 | 23.109 |
| 8/29/2011 23:59:01 | 16.524 | 8/24/2011 11:59:01 | 23.109 |
| 8/30/2011 00:39:01 | 15.898 | 8/24/2011 12:39:01 | 23.109 |
| 8/30/2011 01:19:01 | 15.459 | 8/24/2011 13:19:01 | 23.109 |
| 8/30/2011 01:59:01 | 14.957 | 8/24/2011 13:59:01 | 23.109 |
| 8/30/2011 02:39:01 | 14.832 | 8/24/2011 14:39:01 | 23.109 |
| 8/30/2011 03:19:01 | 15.396 | 8/24/2011 15:19:01 | 23.109 |
| 8/30/2011 03:59:01 | 18.654 | 8/24/2011 15:59:01 | 23.171 |
| 8/30/2011 04:39:01 | 20.219 | 8/24/2011 16:39:01 | 23.171 |
| 8/30/2011 05:19:01 | 19.092 | 8/24/2011 17:19:01 | 23.234 |
| 8/30/2011 05:59:01 | 17.339 | 8/24/2011 17:59:01 | 23.234 |
| 8/30/2011 06:39:01 | 17.276 | 8/24/2011 18:39:01 | 23.234 |
| 8/30/2011 07:19:01 | 19.843 | 8/24/2011 19:19:01 | 23.296 |
| 8/30/2011 07:59:01 | 23.284 | 8/24/2011 19:59:01 | 23.296 |
| 8/30/2011 08:39:01 | 25.534 | 8/24/2011 20:39:01 | 23.296 |

|                    |        |                    |        |
|--------------------|--------|--------------------|--------|
| 8/30/2011 09:19:01 | 28.033 | 8/24/2011 21:19:01 | 23.359 |
| 8/30/2011 09:59:01 | 29.219 | 8/24/2011 21:59:01 | 23.359 |
| 8/30/2011 10:39:01 | 30.841 | 8/24/2011 22:39:01 | 23.359 |
| 8/30/2011 11:19:01 | 32.338 | 8/24/2011 23:19:01 | 23.359 |
| 8/30/2011 11:59:01 | 33.024 | 8/24/2011 23:59:01 | 23.359 |
| 8/30/2011 12:39:01 | 34.146 | 8/25/2011 00:39:01 | 23.296 |
| 8/30/2011 13:19:01 | 34.520 | 8/25/2011 01:19:01 | 23.296 |
| 8/30/2011 13:59:01 | 34.831 | 8/25/2011 01:59:01 | 23.296 |
| 8/30/2011 14:39:01 | 35.081 | 8/25/2011 02:39:01 | 23.296 |
| 8/30/2011 15:19:01 | 34.645 | 8/25/2011 03:19:01 | 23.296 |
| 8/30/2011 15:59:01 | 32.650 | 8/25/2011 03:59:01 | 23.234 |
| 8/30/2011 16:39:01 | 31.153 | 8/25/2011 04:39:01 | 23.234 |
| 8/30/2011 17:19:01 | 29.406 | 8/25/2011 05:19:01 | 23.234 |
| 8/30/2011 17:59:01 | 27.533 | 8/25/2011 05:59:01 | 23.171 |
| 8/30/2011 18:39:01 | 25.534 | 8/25/2011 06:39:01 | 23.171 |
| 8/30/2011 19:19:01 | 23.847 | 8/25/2011 07:19:01 | 23.109 |
| 8/30/2011 19:59:01 | 23.659 | 8/25/2011 07:59:01 | 23.109 |
| 8/30/2011 20:39:01 | 23.722 | 8/25/2011 08:39:01 | 23.046 |
| 8/30/2011 21:19:01 | 23.659 | 8/25/2011 09:19:01 | 22.984 |
| 8/30/2011 21:59:01 | 23.409 | 8/25/2011 09:59:01 | 22.984 |
| 8/30/2011 22:39:01 | 22.971 | 8/25/2011 10:39:01 | 22.921 |
| 8/30/2011 23:19:01 | 22.284 | 8/25/2011 11:19:01 | 22.921 |
| 8/30/2011 23:59:01 | 21.971 | 8/25/2011 11:59:01 | 22.921 |
| 8/31/2011 00:39:01 | 21.470 | 8/25/2011 12:39:01 | 22.921 |
| 8/31/2011 01:19:01 | 20.907 | 8/25/2011 13:19:01 | 22.859 |
| 8/31/2011 01:59:01 | 20.532 | 8/25/2011 13:59:01 | 22.859 |
| 8/31/2011 02:39:01 | 20.031 | 8/25/2011 14:39:01 | 22.921 |
| 8/31/2011 03:19:01 | 19.530 | 8/25/2011 15:19:01 | 22.921 |
| 8/31/2011 03:59:01 | 19.217 | 8/25/2011 15:59:01 | 22.921 |
| 8/31/2011 04:39:01 | 18.654 | 8/25/2011 16:39:01 | 22.984 |
| 8/31/2011 05:19:01 | 17.902 | 8/25/2011 17:19:01 | 22.984 |
| 8/31/2011 05:59:01 | 16.900 | 8/25/2011 17:59:01 | 22.984 |
| 8/31/2011 06:39:01 | 17.088 | 8/25/2011 18:39:01 | 23.046 |
| 8/31/2011 07:19:01 | 19.343 | 8/25/2011 19:19:01 | 23.046 |
| 8/31/2011 07:59:01 | 22.784 | 8/25/2011 19:59:01 | 23.046 |
| 8/31/2011 08:39:01 | 25.347 | 8/25/2011 20:39:01 | 23.109 |
| 8/31/2011 09:19:01 | 27.471 | 8/25/2011 21:19:01 | 23.109 |
| 8/31/2011 09:59:01 | 28.595 | 8/25/2011 21:59:01 | 23.109 |
| 8/31/2011 10:39:01 | 29.843 | 8/25/2011 22:39:01 | 23.109 |
| 8/31/2011 11:19:01 | 30.904 | 8/25/2011 23:19:01 | 23.109 |
| 8/31/2011 11:59:01 | 32.525 | 8/25/2011 23:59:01 | 23.109 |
| 8/31/2011 12:39:01 | 32.837 | 8/26/2011 00:39:01 | 23.109 |
| 8/31/2011 13:19:01 | 33.460 | 8/26/2011 01:19:01 | 23.109 |
| 8/31/2011 13:59:01 | 33.585 | 8/26/2011 01:59:01 | 23.046 |
| 8/31/2011 14:39:01 | 33.772 | 8/26/2011 02:39:01 | 23.046 |
| 8/31/2011 15:19:01 | 32.837 | 8/26/2011 03:19:01 | 23.046 |
| 8/31/2011 15:59:01 | 31.527 | 8/26/2011 03:59:01 | 22.984 |
| 8/31/2011 16:39:01 | 30.093 | 8/26/2011 04:39:01 | 22.984 |
| 8/31/2011 17:19:01 | 28.907 | 8/26/2011 05:19:01 | 22.921 |
| 8/31/2011 17:59:01 | 28.095 | 8/26/2011 05:59:01 | 22.921 |

|                    |        |                    |        |
|--------------------|--------|--------------------|--------|
| 8/31/2011 18:39:01 | 27.221 | 8/26/2011 06:39:01 | 22.859 |
| 8/31/2011 19:19:01 | 26.159 | 8/26/2011 07:19:01 | 22.796 |
| 8/31/2011 19:59:01 | 25.347 | 8/26/2011 07:59:01 | 22.796 |
| 8/31/2011 20:39:01 | 24.784 | 8/26/2011 08:39:01 | 22.734 |
| 8/31/2011 21:19:01 | 23.909 | 8/26/2011 09:19:01 | 22.734 |
| 8/31/2011 21:59:01 | 23.159 | 8/26/2011 09:59:01 | 22.734 |
| 8/31/2011 22:39:01 | 22.721 | 8/26/2011 10:39:01 | 22.671 |
| 8/31/2011 23:19:01 | 22.096 | 8/26/2011 11:19:01 | 22.671 |
| 8/31/2011 23:59:01 | 21.595 | 8/26/2011 11:59:01 | 22.609 |
| 9/1/2011 00:39:01  | 21.032 | 8/26/2011 12:39:01 | 22.609 |
| 9/1/2011 01:19:01  | 20.782 | 8/26/2011 13:19:01 | 22.609 |
| 9/1/2011 01:59:01  | 20.344 | 8/26/2011 13:59:01 | 22.671 |
| 9/1/2011 02:39:01  | 19.906 | 8/26/2011 14:39:01 | 22.671 |
| 9/1/2011 03:19:01  | 18.779 | 8/26/2011 15:19:01 | 22.671 |
| 9/1/2011 03:59:01  | 18.028 | 8/26/2011 15:59:01 | 22.734 |
| 9/1/2011 04:39:01  | 16.900 | 8/26/2011 16:39:01 | 22.734 |
| 9/1/2011 05:19:01  | 15.772 | 8/26/2011 17:19:01 | 22.796 |
| 9/1/2011 05:59:01  | 14.456 | 8/26/2011 17:59:01 | 22.859 |
| 9/1/2011 06:39:01  | 13.892 | 8/26/2011 18:39:01 | 22.859 |
| 9/1/2011 07:19:01  | 16.148 | 8/26/2011 19:19:01 | 22.921 |
| 9/1/2011 07:59:01  | 21.408 | 8/26/2011 19:59:01 | 22.921 |
| 9/1/2011 08:39:01  | 24.409 | 8/26/2011 20:39:01 | 22.921 |
| 9/1/2011 09:19:01  | 27.221 | 8/26/2011 21:19:01 | 22.984 |
| 9/1/2011 09:59:01  | 28.407 | 8/26/2011 21:59:01 | 22.984 |
| 9/1/2011 10:39:01  | 30.217 | 8/26/2011 22:39:01 | 22.984 |
| 9/1/2011 11:19:01  | 31.652 | 8/26/2011 23:19:01 | 22.984 |
| 9/1/2011 11:59:01  | 31.590 | 8/26/2011 23:59:01 | 22.984 |
| 9/1/2011 12:39:01  | 32.463 | 8/27/2011 00:39:01 | 22.984 |
| 9/1/2011 13:19:01  | 33.897 | 8/27/2011 01:19:01 | 22.984 |
| 9/1/2011 13:59:01  | 34.707 | 8/27/2011 01:59:01 | 22.984 |
| 9/1/2011 14:39:01  | 34.582 | 8/27/2011 02:39:01 | 22.984 |
| 9/1/2011 15:19:01  | 33.710 | 8/27/2011 03:19:01 | 22.984 |
| 9/1/2011 15:59:01  | 31.777 | 8/27/2011 03:59:01 | 22.984 |
| 9/1/2011 16:39:01  | 30.155 | 8/27/2011 04:39:01 | 22.984 |
| 9/1/2011 17:19:01  | 28.407 | 8/27/2011 05:19:01 | 22.921 |
| 9/1/2011 17:59:01  | 25.659 | 8/27/2011 05:59:01 | 22.921 |
| 9/1/2011 18:39:01  | 25.284 | 8/27/2011 06:39:01 | 22.921 |
| 9/1/2011 19:19:01  | 25.347 | 8/27/2011 07:19:01 | 22.859 |
| 9/1/2011 19:59:01  | 24.972 | 8/27/2011 07:59:01 | 22.859 |
| 9/1/2011 20:39:01  | 24.472 | 8/27/2011 08:39:01 | 22.859 |
| 9/1/2011 21:19:01  | 23.784 | 8/27/2011 09:19:01 | 22.859 |
| 9/1/2011 21:59:01  | 23.034 | 8/27/2011 09:59:01 | 22.796 |
| 9/1/2011 22:39:01  | 22.471 | 8/27/2011 10:39:01 | 22.796 |
| 9/1/2011 23:19:01  | 22.096 | 8/27/2011 11:19:01 | 22.796 |
| 9/1/2011 23:59:01  | 22.033 | 8/27/2011 11:59:01 | 22.796 |
| 9/2/2011 00:39:01  | 21.721 | 8/27/2011 12:39:01 | 22.796 |
| 9/2/2011 01:19:01  | 21.408 | 8/27/2011 13:19:01 | 22.796 |
| 9/2/2011 01:59:01  | 21.032 | 8/27/2011 13:59:01 | 22.796 |
| 9/2/2011 02:39:01  | 20.970 | 8/27/2011 14:39:01 | 22.859 |
| 9/2/2011 03:19:01  | 20.469 | 8/27/2011 15:19:01 | 22.859 |

|                   |        |                    |        |
|-------------------|--------|--------------------|--------|
| 9/2/2011 03:59:01 | 20.281 | 8/27/2011 15:59:01 | 22.921 |
| 9/2/2011 04:39:01 | 20.156 | 8/27/2011 16:39:01 | 22.921 |
| 9/2/2011 05:19:01 | 20.469 | 8/27/2011 17:19:01 | 22.984 |
| 9/2/2011 05:59:01 | 20.281 | 8/27/2011 17:59:01 | 22.984 |
| 9/2/2011 06:39:01 | 20.657 | 8/27/2011 18:39:01 | 23.046 |
| 9/2/2011 07:19:01 | 22.096 | 8/27/2011 19:19:01 | 23.046 |
| 9/2/2011 07:59:01 | 23.847 | 8/27/2011 19:59:01 | 23.109 |
| 9/2/2011 08:39:01 | 25.847 | 8/27/2011 20:39:01 | 23.109 |
| 9/2/2011 09:19:01 | 28.283 | 8/27/2011 21:19:01 | 23.109 |
| 9/2/2011 09:59:01 | 29.406 | 8/27/2011 21:59:01 | 23.171 |
| 9/2/2011 10:39:01 | 30.529 | 8/27/2011 22:39:01 | 23.171 |
| 9/2/2011 11:19:01 | 31.777 | 8/27/2011 23:19:01 | 23.171 |
| 9/2/2011 11:59:01 | 32.588 | 8/27/2011 23:59:01 | 23.171 |
| 9/2/2011 12:39:01 | 33.460 | 8/28/2011 00:39:01 | 23.171 |
| 9/2/2011 13:19:01 | 33.834 | 8/28/2011 01:19:01 | 23.171 |
| 9/2/2011 13:59:01 | 33.647 | 8/28/2011 01:59:01 | 23.171 |
| 9/2/2011 14:39:01 | 33.897 | 8/28/2011 02:39:01 | 23.171 |
| 9/2/2011 15:19:01 | 32.463 | 8/28/2011 03:19:01 | 23.171 |
| 9/2/2011 15:59:01 | 31.964 | 8/28/2011 03:59:01 | 23.171 |
| 9/2/2011 16:39:01 | 29.781 | 8/28/2011 04:39:01 | 23.109 |
| 9/2/2011 17:19:01 | 28.907 | 8/28/2011 05:19:01 | 23.109 |
| 9/2/2011 17:59:01 | 27.471 | 8/28/2011 05:59:01 | 23.109 |
| 9/2/2011 18:39:01 | 26.097 | 8/28/2011 06:39:01 | 23.109 |
| 9/2/2011 19:19:01 | 25.409 | 8/28/2011 07:19:01 | 23.046 |
| 9/2/2011 19:59:01 | 25.034 | 8/28/2011 07:59:01 | 23.046 |
| 9/2/2011 20:39:01 | 24.222 | 8/28/2011 08:39:01 | 23.046 |
| 9/2/2011 21:19:01 | 23.409 | 8/28/2011 09:19:01 | 22.984 |
| 9/2/2011 21:59:01 | 22.909 | 8/28/2011 09:59:01 | 22.984 |
| 9/2/2011 22:39:01 | 22.033 | 8/28/2011 10:39:01 | 22.921 |
| 9/2/2011 23:19:01 | 21.032 | 8/28/2011 11:19:01 | 22.921 |
| 9/2/2011 23:59:01 | 21.157 | 8/28/2011 11:59:01 | 22.921 |
| 9/3/2011 00:39:01 | 20.845 | 8/28/2011 12:39:01 | 22.921 |
| 9/3/2011 01:19:01 | 19.530 | 8/28/2011 13:19:01 | 22.921 |
| 9/3/2011 01:59:01 | 18.153 | 8/28/2011 13:59:01 | 22.921 |
| 9/3/2011 02:39:01 | 17.276 | 8/28/2011 14:39:01 | 22.921 |
| 9/3/2011 03:19:01 | 16.900 | 8/28/2011 15:19:01 | 22.984 |
| 9/3/2011 03:59:01 | 16.837 | 8/28/2011 15:59:01 | 22.984 |
| 9/3/2011 04:39:01 | 16.587 | 8/28/2011 16:39:01 | 22.984 |
| 9/3/2011 05:19:01 | 16.211 | 8/28/2011 17:19:01 | 23.046 |
| 9/3/2011 05:59:01 | 15.710 | 8/28/2011 17:59:01 | 23.046 |
| 9/3/2011 06:39:01 | 15.772 | 8/28/2011 18:39:01 | 23.109 |
| 9/3/2011 07:19:01 | 17.339 | 8/28/2011 19:19:01 | 23.109 |
| 9/3/2011 07:59:01 | 21.658 | 8/28/2011 19:59:01 | 23.171 |
| 9/3/2011 08:39:01 | 26.159 | 8/28/2011 20:39:01 | 23.171 |
| 9/3/2011 09:19:01 | 28.782 | 8/28/2011 21:19:01 | 23.171 |
| 9/3/2011 09:59:01 | 29.781 | 8/28/2011 21:59:01 | 23.234 |
| 9/3/2011 10:39:01 | 30.904 | 8/28/2011 22:39:01 | 23.234 |
| 9/3/2011 11:19:01 | 32.276 | 8/28/2011 23:19:01 | 23.234 |
| 9/3/2011 11:59:01 | 32.899 | 8/28/2011 23:59:01 | 23.234 |
| 9/3/2011 12:39:01 | 33.585 | 8/29/2011 00:39:01 | 23.234 |



|                   |        |                    |        |
|-------------------|--------|--------------------|--------|
| 9/3/2011 13:19:01 | 33.710 | 8/29/2011 01:19:01 | 23.234 |
| 9/3/2011 13:59:01 | 34.458 | 8/29/2011 01:59:01 | 23.234 |
| 9/3/2011 14:39:01 | 33.834 | 8/29/2011 02:39:01 | 23.171 |
| 9/3/2011 15:19:01 | 32.837 | 8/29/2011 03:19:01 | 23.171 |
| 9/3/2011 15:59:01 | 31.902 | 8/29/2011 03:59:01 | 23.171 |
| 9/3/2011 16:39:01 | 31.527 | 8/29/2011 04:39:01 | 23.171 |
| 9/3/2011 17:19:01 | 30.155 | 8/29/2011 05:19:01 | 23.109 |
| 9/3/2011 17:59:01 | 28.158 | 8/29/2011 05:59:01 | 23.109 |
| 9/3/2011 18:39:01 | 26.034 | 8/29/2011 06:39:01 | 23.109 |
| 9/3/2011 19:19:01 | 24.847 | 8/29/2011 07:19:01 | 23.046 |
| 9/3/2011 19:59:01 | 23.784 | 8/29/2011 07:59:01 | 23.046 |
| 9/3/2011 20:39:01 | 22.784 | 8/29/2011 08:39:01 | 22.984 |
| 9/3/2011 21:19:01 | 22.096 | 8/29/2011 09:19:01 | 22.984 |
| 9/3/2011 21:59:01 | 21.846 | 8/29/2011 09:59:01 | 22.984 |
| 9/3/2011 22:39:01 | 20.657 | 8/29/2011 10:39:01 | 22.921 |
| 9/3/2011 23:19:01 | 20.094 | 8/29/2011 11:19:01 | 22.921 |
| 9/3/2011 23:59:01 | 19.718 | 8/29/2011 11:59:01 | 22.921 |
| 9/4/2011 00:39:01 | 19.029 | 8/29/2011 12:39:01 | 22.921 |
| 9/4/2011 01:19:01 | 18.403 | 8/29/2011 13:19:01 | 22.921 |
| 9/4/2011 01:59:01 | 18.153 | 8/29/2011 13:59:01 | 22.921 |
| 9/4/2011 02:39:01 | 16.837 | 8/29/2011 14:39:01 | 22.921 |
| 9/4/2011 03:19:01 | 16.086 | 8/29/2011 15:19:01 | 22.984 |
| 9/4/2011 03:59:01 | 15.522 | 8/29/2011 15:59:01 | 22.984 |
| 9/4/2011 04:39:01 | 15.396 | 8/29/2011 16:39:01 | 23.046 |
| 9/4/2011 05:19:01 | 14.957 | 8/29/2011 17:19:01 | 23.046 |
| 9/4/2011 05:59:01 | 14.581 | 8/29/2011 17:59:01 | 23.109 |
| 9/4/2011 06:39:01 | 14.769 | 8/29/2011 18:39:01 | 23.109 |
| 9/4/2011 07:19:01 | 17.464 | 8/29/2011 19:19:01 | 23.171 |
| 9/4/2011 07:59:01 | 22.096 | 8/29/2011 19:59:01 | 23.171 |
| 9/4/2011 08:39:01 | 26.034 | 8/29/2011 20:39:01 | 23.234 |
| 9/4/2011 09:19:01 | 28.969 | 8/29/2011 21:19:01 | 23.234 |
| 9/4/2011 09:59:01 | 30.342 | 8/29/2011 21:59:01 | 23.234 |
| 9/4/2011 10:39:01 | 31.652 | 8/29/2011 22:39:01 | 23.234 |
| 9/4/2011 11:19:01 | 32.463 | 8/29/2011 23:19:01 | 23.234 |
| 9/4/2011 11:59:01 | 33.398 | 8/29/2011 23:59:01 | 23.234 |
| 9/4/2011 12:39:01 | 34.208 | 8/30/2011 00:39:01 | 23.234 |
| 9/4/2011 13:19:01 | 34.146 | 8/30/2011 01:19:01 | 23.234 |
| 9/4/2011 13:59:01 | 36.140 | 8/30/2011 01:59:01 | 23.234 |
| 9/4/2011 14:39:01 | 32.276 | 8/30/2011 02:39:01 | 23.234 |
| 9/4/2011 15:19:01 | 33.211 | 8/30/2011 03:19:01 | 23.171 |
| 9/4/2011 15:59:01 | 30.405 | 8/30/2011 03:59:01 | 23.171 |
| 9/4/2011 16:39:01 | 27.908 | 8/30/2011 04:39:01 | 23.171 |
| 9/4/2011 17:19:01 | 26.347 | 8/30/2011 05:19:01 | 23.109 |
| 9/4/2011 17:59:01 | 24.347 | 8/30/2011 05:59:01 | 23.109 |
| 9/4/2011 18:39:01 | 22.096 | 8/30/2011 06:39:01 | 23.046 |
| 9/4/2011 19:19:01 | 20.657 | 8/30/2011 07:19:01 | 23.046 |
| 9/4/2011 19:59:01 | 20.281 | 8/30/2011 07:59:01 | 23.046 |
| 9/4/2011 20:39:01 | 20.407 | 8/30/2011 08:39:01 | 22.984 |
| 9/4/2011 21:19:01 | 19.968 | 8/30/2011 09:19:01 | 22.984 |
| 9/4/2011 21:59:01 | 19.781 | 8/30/2011 09:59:01 | 22.984 |

|                   |                           |        |
|-------------------|---------------------------|--------|
| 9/4/2011 22:39:01 | 20.782 8/30/2011 10:39:01 | 22.921 |
| 9/4/2011 23:19:01 | 20.281 8/30/2011 11:19:01 | 22.921 |
| 9/4/2011 23:59:01 | 19.217 8/30/2011 11:59:01 | 22.921 |
| 9/5/2011 00:39:01 | 18.215 8/30/2011 12:39:01 | 22.921 |
| 9/5/2011 01:19:01 | 18.153 8/30/2011 13:19:01 | 22.921 |
| 9/5/2011 01:59:01 | 18.967 8/30/2011 13:59:01 | 22.921 |
| 9/5/2011 02:39:01 | 19.280 8/30/2011 14:39:01 | 22.921 |
| 9/5/2011 03:19:01 | 18.591 8/30/2011 15:19:01 | 22.984 |
| 9/5/2011 03:59:01 | 18.779 8/30/2011 15:59:01 | 22.984 |
| 9/5/2011 04:39:01 | 18.028 8/30/2011 16:39:01 | 23.046 |
| 9/5/2011 05:19:01 | 17.213 8/30/2011 17:19:01 | 23.046 |
| 9/5/2011 05:59:01 | 17.088 8/30/2011 17:59:01 | 23.109 |
| 9/5/2011 06:39:01 | 16.587 8/30/2011 18:39:01 | 23.109 |
| 9/5/2011 07:19:01 | 18.215 8/30/2011 19:19:01 | 23.171 |
| 9/5/2011 07:59:01 | 22.346 8/30/2011 19:59:01 | 23.171 |
| 9/5/2011 08:39:01 | 26.034 8/30/2011 20:39:01 | 23.171 |
| 9/5/2011 09:19:01 | 28.720 8/30/2011 21:19:01 | 23.234 |
| 9/5/2011 09:59:01 | 30.217 8/30/2011 21:59:01 | 23.234 |
| 9/5/2011 10:39:01 | 31.715 8/30/2011 22:39:01 | 23.234 |
| 9/5/2011 11:19:01 | 32.899 8/30/2011 23:19:01 | 23.234 |
| 9/5/2011 11:59:01 | 33.897 8/30/2011 23:59:01 | 23.234 |
| 9/5/2011 12:39:01 | 34.458 8/31/2011 00:39:01 | 23.234 |
| 9/5/2011 13:19:01 | 35.143 8/31/2011 01:19:01 | 23.234 |
| 9/5/2011 13:59:01 | 35.891 8/31/2011 01:59:01 | 23.234 |
| 9/5/2011 14:39:01 | 36.202 8/31/2011 02:39:01 | 23.234 |
| 9/5/2011 15:19:01 | 34.894 8/31/2011 03:19:01 | 23.234 |
| 9/5/2011 15:59:01 | 33.211 8/31/2011 03:59:01 | 23.234 |
| 9/5/2011 16:39:01 | 31.652 8/31/2011 04:39:01 | 23.234 |
| 9/5/2011 17:19:01 | 28.969 8/31/2011 05:19:01 | 23.234 |
| 9/5/2011 17:59:01 | 26.097 8/31/2011 05:59:01 | 23.171 |
| 9/5/2011 18:39:01 | 24.909 8/31/2011 06:39:01 | 23.171 |
| 9/5/2011 19:19:01 | 24.409 8/31/2011 07:19:01 | 23.171 |
| 9/5/2011 19:59:01 | 22.971 8/31/2011 07:59:01 | 23.109 |
| 9/5/2011 20:39:01 | 22.659 8/31/2011 08:39:01 | 23.109 |
| 9/5/2011 21:19:01 | 22.158 8/31/2011 09:19:01 | 23.109 |
| 9/5/2011 21:59:01 | 22.784 8/31/2011 09:59:01 | 23.046 |
| 9/5/2011 22:39:01 | 22.721 8/31/2011 10:39:01 | 23.046 |
| 9/5/2011 23:19:01 | 22.158 8/31/2011 11:19:01 | 22.984 |
| 9/5/2011 23:59:01 | 22.284 8/31/2011 11:59:01 | 22.984 |
| 9/6/2011 00:39:01 | 22.471 8/31/2011 12:39:01 | 22.984 |
| 9/6/2011 01:19:01 | 21.783 8/31/2011 13:19:01 | 22.984 |
| 9/6/2011 01:59:01 | 21.283 8/31/2011 13:59:01 | 22.984 |
| 9/6/2011 02:39:01 | 20.719 8/31/2011 14:39:01 | 22.984 |
| 9/6/2011 03:19:01 | 19.968 8/31/2011 15:19:01 | 23.046 |
| 9/6/2011 03:59:01 | 18.967 8/31/2011 15:59:01 | 23.046 |
| 9/6/2011 04:39:01 | 17.840 8/31/2011 16:39:01 | 23.046 |
| 9/6/2011 05:19:01 | 17.464 8/31/2011 17:19:01 | 23.109 |
| 9/6/2011 05:59:01 | 18.215 8/31/2011 17:59:01 | 23.109 |
| 9/6/2011 06:39:01 | 17.652 8/31/2011 18:39:01 | 23.171 |
| 9/6/2011 07:19:01 | 19.968 8/31/2011 19:19:01 | 23.171 |

|                   |        |                    |        |
|-------------------|--------|--------------------|--------|
| 9/6/2011 07:59:01 | 23.534 | 8/31/2011 19:59:01 | 23.234 |
| 9/6/2011 08:39:01 | 26.347 | 8/31/2011 20:39:01 | 23.234 |
| 9/6/2011 09:19:01 | 28.407 | 8/31/2011 21:19:01 | 23.234 |
| 9/6/2011 09:59:01 | 29.531 | 8/31/2011 21:59:01 | 23.296 |
| 9/6/2011 10:39:01 | 31.028 | 8/31/2011 22:39:01 | 23.296 |
| 9/6/2011 11:19:01 | 32.401 | 8/31/2011 23:19:01 | 23.296 |
| 9/6/2011 11:59:01 | 33.273 | 8/31/2011 23:59:01 | 23.296 |
| 9/6/2011 12:39:01 | 34.084 | 9/1/2011 00:39:01  | 23.296 |
| 9/6/2011 13:19:01 | 35.018 | 9/1/2011 01:19:01  | 23.296 |
| 9/6/2011 13:59:01 | 36.202 | 9/1/2011 01:59:01  | 23.296 |
| 9/6/2011 14:39:01 | 36.576 | 9/1/2011 02:39:01  | 23.296 |
| 9/6/2011 15:19:01 | 35.143 | 9/1/2011 03:19:01  | 23.296 |
| 9/6/2011 15:59:01 | 33.710 | 9/1/2011 03:59:01  | 23.296 |
| 9/6/2011 16:39:01 | 32.089 | 9/1/2011 04:39:01  | 23.296 |
| 9/6/2011 17:19:01 | 28.969 | 9/1/2011 05:19:01  | 23.234 |
| 9/6/2011 17:59:01 | 25.847 | 9/1/2011 05:59:01  | 23.234 |
| 9/6/2011 18:39:01 | 23.472 | 9/1/2011 06:39:01  | 23.234 |
| 9/6/2011 19:19:01 | 21.345 | 9/1/2011 07:19:01  | 23.171 |
| 9/6/2011 19:59:01 | 19.656 | 9/1/2011 07:59:01  | 23.171 |
| 9/6/2011 20:39:01 | 19.593 | 9/1/2011 08:39:01  | 23.171 |
| 9/6/2011 21:19:01 | 19.781 | 9/1/2011 09:19:01  | 23.109 |
| 9/6/2011 21:59:01 | 19.906 | 9/1/2011 09:59:01  | 23.109 |
| 9/6/2011 22:39:01 | 19.405 | 9/1/2011 10:39:01  | 23.046 |
| 9/6/2011 23:19:01 | 19.280 | 9/1/2011 11:19:01  | 23.046 |
| 9/6/2011 23:59:01 | 18.967 | 9/1/2011 11:59:01  | 22.984 |
| 9/7/2011 00:39:01 | 18.341 | 9/1/2011 12:39:01  | 22.984 |
| 9/7/2011 01:19:01 | 17.652 | 9/1/2011 13:19:01  | 22.984 |
| 9/7/2011 01:59:01 | 17.589 | 9/1/2011 13:59:01  | 23.046 |
| 9/7/2011 02:39:01 | 17.088 | 9/1/2011 14:39:01  | 23.046 |
| 9/7/2011 03:19:01 | 16.587 | 9/1/2011 15:19:01  | 23.046 |
| 9/7/2011 03:59:01 | 16.148 | 9/1/2011 15:59:01  | 23.109 |
| 9/7/2011 04:39:01 | 15.835 | 9/1/2011 16:39:01  | 23.109 |
| 9/7/2011 05:19:01 | 15.522 | 9/1/2011 17:19:01  | 23.109 |
| 9/7/2011 05:59:01 | 15.835 | 9/1/2011 17:59:01  | 23.171 |
| 9/7/2011 06:39:01 | 18.215 | 9/1/2011 18:39:01  | 23.171 |
| 9/7/2011 07:19:01 | 21.345 | 9/1/2011 19:19:01  | 23.234 |
| 9/7/2011 07:59:01 | 23.847 | 9/1/2011 19:59:01  | 23.234 |
| 9/7/2011 08:39:01 | 26.534 | 9/1/2011 20:39:01  | 23.234 |
| 9/7/2011 09:19:01 | 28.782 | 9/1/2011 21:19:01  | 23.296 |
| 9/7/2011 09:59:01 | 30.217 | 9/1/2011 21:59:01  | 23.296 |
| 9/7/2011 10:39:01 | 31.590 | 9/1/2011 22:39:01  | 23.296 |
| 9/7/2011 11:19:01 | 32.525 | 9/1/2011 23:19:01  | 23.296 |
| 9/7/2011 11:59:01 | 33.710 | 9/1/2011 23:59:01  | 23.296 |
| 9/7/2011 12:39:01 | 34.208 | 9/2/2011 00:39:01  | 23.296 |
| 9/7/2011 13:19:01 | 35.081 | 9/2/2011 01:19:01  | 23.296 |
| 9/7/2011 13:59:01 | 35.953 | 9/2/2011 01:59:01  | 23.296 |
| 9/7/2011 14:39:01 | 36.077 | 9/2/2011 02:39:01  | 23.296 |
| 9/7/2011 15:19:01 | 34.458 | 9/2/2011 03:19:01  | 23.296 |
| 9/7/2011 15:59:01 | 33.460 | 9/2/2011 03:59:01  | 23.296 |
| 9/7/2011 16:39:01 | 32.151 | 9/2/2011 04:39:01  | 23.296 |

|                   |        |                   |        |
|-------------------|--------|-------------------|--------|
| 9/7/2011 17:19:01 | 31.153 | 9/2/2011 05:19:01 | 23.234 |
| 9/7/2011 17:59:01 | 28.220 | 9/2/2011 05:59:01 | 23.234 |
| 9/7/2011 18:39:01 | 24.972 | 9/2/2011 06:39:01 | 23.234 |
| 9/7/2011 19:19:01 | 22.846 | 9/2/2011 07:19:01 | 23.234 |
| 9/7/2011 19:59:01 | 21.157 | 9/2/2011 07:59:01 | 23.234 |
| 9/7/2011 20:39:01 | 20.782 | 9/2/2011 08:39:01 | 23.171 |
| 9/7/2011 21:19:01 | 23.409 | 9/2/2011 09:19:01 | 23.171 |
| 9/7/2011 21:59:01 | 22.534 | 9/2/2011 09:59:01 | 23.171 |
| 9/7/2011 22:39:01 | 20.407 | 9/2/2011 10:39:01 | 23.109 |
| 9/7/2011 23:19:01 | 19.029 | 9/2/2011 11:19:01 | 23.109 |
| 9/7/2011 23:59:01 | 17.714 | 9/2/2011 11:59:01 | 23.109 |
| 9/8/2011 00:39:01 | 16.775 | 9/2/2011 12:39:01 | 23.109 |
| 9/8/2011 01:19:01 | 15.960 | 9/2/2011 13:19:01 | 23.109 |
| 9/8/2011 01:59:01 | 15.396 | 9/2/2011 13:59:01 | 23.171 |
| 9/8/2011 02:39:01 | 14.832 | 9/2/2011 14:39:01 | 23.171 |
| 9/8/2011 03:19:01 | 14.456 | 9/2/2011 15:19:01 | 23.171 |
| 9/8/2011 03:59:01 | 14.895 | 9/2/2011 15:59:01 | 23.234 |
| 9/8/2011 04:39:01 | 14.644 | 9/2/2011 16:39:01 | 23.234 |
| 9/8/2011 05:19:01 | 14.205 | 9/2/2011 17:19:01 | 23.296 |
| 9/8/2011 05:59:01 | 14.330 | 9/2/2011 17:59:01 | 23.296 |
| 9/8/2011 06:39:01 | 14.707 | 9/2/2011 18:39:01 | 23.359 |
| 9/8/2011 07:19:01 | 19.280 | 9/2/2011 19:19:01 | 23.359 |
| 9/8/2011 07:59:01 | 24.534 | 9/2/2011 19:59:01 | 23.359 |
| 9/8/2011 08:39:01 | 26.846 | 9/2/2011 20:39:01 | 23.421 |
| 9/8/2011 09:19:01 | 28.720 | 9/2/2011 21:19:01 | 23.421 |
| 9/8/2011 09:59:01 | 30.342 | 9/2/2011 21:59:01 | 23.421 |
| 9/8/2011 10:39:01 | 31.652 | 9/2/2011 22:39:01 | 23.484 |
| 9/8/2011 11:19:01 | 32.525 | 9/2/2011 23:19:01 | 23.484 |
| 9/8/2011 11:59:01 | 33.647 | 9/2/2011 23:59:01 | 23.484 |
| 9/8/2011 12:39:01 | 34.707 | 9/3/2011 00:39:01 | 23.484 |
| 9/8/2011 13:19:01 | 35.641 | 9/3/2011 01:19:01 | 23.484 |
| 9/8/2011 13:59:01 | 36.513 | 9/3/2011 01:59:01 | 23.484 |
| 9/8/2011 14:39:01 | 36.762 | 9/3/2011 02:39:01 | 23.484 |
| 9/8/2011 15:19:01 | 34.645 | 9/3/2011 03:19:01 | 23.484 |
| 9/8/2011 15:59:01 | 33.273 | 9/3/2011 03:59:01 | 23.484 |
| 9/8/2011 16:39:01 | 32.338 | 9/3/2011 04:39:01 | 23.484 |
| 9/8/2011 17:19:01 | 31.403 | 9/3/2011 05:19:01 | 23.484 |
| 9/8/2011 17:59:01 | 29.406 | 9/3/2011 05:59:01 | 23.421 |
| 9/8/2011 18:39:01 | 28.345 | 9/3/2011 06:39:01 | 23.421 |
| 9/8/2011 19:19:01 | 28.033 | 9/3/2011 07:19:01 | 23.359 |
| 9/8/2011 19:59:01 | 26.409 | 9/3/2011 07:59:01 | 23.359 |
| 9/8/2011 20:39:01 | 25.222 | 9/3/2011 08:39:01 | 23.359 |
| 9/8/2011 21:19:01 | 24.159 | 9/3/2011 09:19:01 | 23.296 |
| 9/8/2011 21:59:01 | 22.409 | 9/3/2011 09:59:01 | 23.296 |
| 9/8/2011 22:39:01 | 21.470 | 9/3/2011 10:39:01 | 23.234 |
| 9/8/2011 23:19:01 | 19.781 | 9/3/2011 11:19:01 | 23.234 |
| 9/8/2011 23:59:01 | 18.466 | 9/3/2011 11:59:01 | 23.234 |
| 9/9/2011 00:39:01 | 17.589 | 9/3/2011 12:39:01 | 23.234 |
| 9/9/2011 01:19:01 | 16.963 | 9/3/2011 13:19:01 | 23.234 |
| 9/9/2011 01:59:01 | 16.148 | 9/3/2011 13:59:01 | 23.234 |

|                    |        |                   |        |
|--------------------|--------|-------------------|--------|
| 9/9/2011 02:39:01  | 15.145 | 9/3/2011 14:39:01 | 23.234 |
| 9/9/2011 03:19:01  | 15.960 | 9/3/2011 15:19:01 | 23.296 |
| 9/9/2011 03:59:01  | 16.086 | 9/3/2011 15:59:01 | 23.296 |
| 9/9/2011 04:39:01  | 16.524 | 9/3/2011 16:39:01 | 23.359 |
| 9/9/2011 05:19:01  | 17.464 | 9/3/2011 17:19:01 | 23.359 |
| 9/9/2011 05:59:01  | 17.339 | 9/3/2011 17:59:01 | 23.421 |
| 9/9/2011 06:39:01  | 17.213 | 9/3/2011 18:39:01 | 23.421 |
| 9/9/2011 07:19:01  | 20.407 | 9/3/2011 19:19:01 | 23.484 |
| 9/9/2011 07:59:01  | 23.097 | 9/3/2011 19:59:01 | 23.484 |
| 9/9/2011 08:39:01  | 25.597 | 9/3/2011 20:39:01 | 23.484 |
| 9/9/2011 09:19:01  | 28.158 | 9/3/2011 21:19:01 | 23.547 |
| 9/9/2011 09:59:01  | 29.593 | 9/3/2011 21:59:01 | 23.547 |
| 9/9/2011 10:39:01  | 30.717 | 9/3/2011 22:39:01 | 23.547 |
| 9/9/2011 11:19:01  | 32.525 | 9/3/2011 23:19:01 | 23.547 |
| 9/9/2011 11:59:01  | 33.086 | 9/3/2011 23:59:01 | 23.547 |
| 9/9/2011 12:39:01  | 33.585 | 9/4/2011 00:39:01 | 23.547 |
| 9/9/2011 13:19:01  | 34.520 | 9/4/2011 01:19:01 | 23.547 |
| 9/9/2011 13:59:01  | 35.454 | 9/4/2011 01:59:01 | 23.547 |
| 9/9/2011 14:39:01  | 35.704 | 9/4/2011 02:39:01 | 23.547 |
| 9/9/2011 15:19:01  | 34.271 | 9/4/2011 03:19:01 | 23.547 |
| 9/9/2011 15:59:01  | 32.962 | 9/4/2011 03:59:01 | 23.484 |
| 9/9/2011 16:39:01  | 31.278 | 9/4/2011 04:39:01 | 23.484 |
| 9/9/2011 17:19:01  | 27.908 | 9/4/2011 05:19:01 | 23.484 |
| 9/9/2011 17:59:01  | 24.784 | 9/4/2011 05:59:01 | 23.421 |
| 9/9/2011 18:39:01  | 21.971 | 9/4/2011 06:39:01 | 23.421 |
| 9/9/2011 19:19:01  | 19.906 | 9/4/2011 07:19:01 | 23.421 |
| 9/9/2011 19:59:01  | 18.341 | 9/4/2011 07:59:01 | 23.359 |
| 9/9/2011 20:39:01  | 18.341 | 9/4/2011 08:39:01 | 23.359 |
| 9/9/2011 21:19:01  | 18.716 | 9/4/2011 09:19:01 | 23.296 |
| 9/9/2011 21:59:01  | 18.028 | 9/4/2011 09:59:01 | 23.296 |
| 9/9/2011 22:39:01  | 17.213 | 9/4/2011 10:39:01 | 23.234 |
| 9/9/2011 23:19:01  | 16.462 | 9/4/2011 11:19:01 | 23.234 |
| 9/9/2011 23:59:01  | 15.960 | 9/4/2011 11:59:01 | 23.234 |
| 9/10/2011 00:39:01 | 15.145 | 9/4/2011 12:39:01 | 23.234 |
| 9/10/2011 01:19:01 | 14.519 | 9/4/2011 13:19:01 | 23.234 |
| 9/10/2011 01:59:01 | 13.829 | 9/4/2011 13:59:01 | 23.234 |
| 9/10/2011 02:39:01 | 13.515 | 9/4/2011 14:39:01 | 23.234 |
| 9/10/2011 03:19:01 | 13.076 | 9/4/2011 15:19:01 | 23.296 |
| 9/10/2011 03:59:01 | 12.574 | 9/4/2011 15:59:01 | 23.296 |
| 9/10/2011 04:39:01 | 12.261 | 9/4/2011 16:39:01 | 23.359 |
| 9/10/2011 05:19:01 | 12.386 | 9/4/2011 17:19:01 | 23.359 |
| 9/10/2011 05:59:01 | 13.641 | 9/4/2011 17:59:01 | 23.421 |
| 9/10/2011 06:39:01 | 15.710 | 9/4/2011 18:39:01 | 23.421 |
| 9/10/2011 07:19:01 | 19.155 | 9/4/2011 19:19:01 | 23.484 |
| 9/10/2011 07:59:01 | 23.159 | 9/4/2011 19:59:01 | 23.484 |
| 9/10/2011 08:39:01 | 26.034 | 9/4/2011 20:39:01 | 23.484 |
| 9/10/2011 09:19:01 | 28.407 | 9/4/2011 21:19:01 | 23.547 |
| 9/10/2011 09:59:01 | 30.093 | 9/4/2011 21:59:01 | 23.547 |
| 9/10/2011 10:39:01 | 31.403 | 9/4/2011 22:39:01 | 23.547 |
| 9/10/2011 11:19:01 | 32.463 | 9/4/2011 23:19:01 | 23.547 |

|                    |        |                   |        |
|--------------------|--------|-------------------|--------|
| 9/10/2011 11:59:01 | 32.650 | 9/4/2011 23:59:01 | 23.547 |
| 9/10/2011 12:39:01 | 33.834 | 9/5/2011 00:39:01 | 23.547 |
| 9/10/2011 13:19:01 | 34.520 | 9/5/2011 01:19:01 | 23.547 |
| 9/10/2011 13:59:01 | 35.081 | 9/5/2011 01:59:01 | 23.484 |
| 9/10/2011 14:39:01 | 35.018 | 9/5/2011 02:39:01 | 23.484 |
| 9/10/2011 15:19:01 | 33.273 | 9/5/2011 03:19:01 | 23.484 |
| 9/10/2011 15:59:01 | 31.902 | 9/5/2011 03:59:01 | 23.484 |
| 9/10/2011 16:39:01 | 30.904 | 9/5/2011 04:39:01 | 23.421 |
| 9/10/2011 17:19:01 | 29.406 | 9/5/2011 05:19:01 | 23.421 |
| 9/10/2011 17:59:01 | 27.283 | 9/5/2011 05:59:01 | 23.421 |
| 9/10/2011 18:39:01 | 24.597 | 9/5/2011 06:39:01 | 23.359 |
| 9/10/2011 19:19:01 | 22.659 | 9/5/2011 07:19:01 | 23.359 |
| 9/10/2011 19:59:01 | 23.534 | 9/5/2011 07:59:01 | 23.359 |
| 9/10/2011 20:39:01 | 23.847 | 9/5/2011 08:39:01 | 23.359 |
| 9/10/2011 21:19:01 | 23.409 | 9/5/2011 09:19:01 | 23.296 |
| 9/10/2011 21:59:01 | 22.971 | 9/5/2011 09:59:01 | 23.296 |
| 9/10/2011 22:39:01 | 22.534 | 9/5/2011 10:39:01 | 23.296 |
| 9/10/2011 23:19:01 | 22.409 | 9/5/2011 11:19:01 | 23.234 |
| 9/10/2011 23:59:01 | 21.283 | 9/5/2011 11:59:01 | 23.234 |
| 9/11/2011 00:39:01 | 21.095 | 9/5/2011 12:39:01 | 23.234 |
| 9/11/2011 01:19:01 | 20.532 | 9/5/2011 13:19:01 | 23.234 |
| 9/11/2011 01:59:01 | 20.031 | 9/5/2011 13:59:01 | 23.234 |
| 9/11/2011 02:39:01 | 19.029 | 9/5/2011 14:39:01 | 23.296 |
| 9/11/2011 03:19:01 | 17.777 | 9/5/2011 15:19:01 | 23.296 |
| 9/11/2011 03:59:01 | 17.025 | 9/5/2011 15:59:01 | 23.359 |
| 9/11/2011 04:39:01 | 16.148 | 9/5/2011 16:39:01 | 23.421 |
| 9/11/2011 05:19:01 | 17.339 | 9/5/2011 17:19:01 | 23.421 |
| 9/11/2011 05:59:01 | 16.587 | 9/5/2011 17:59:01 | 23.484 |
| 9/11/2011 06:39:01 | 17.213 | 9/5/2011 18:39:01 | 23.484 |
| 9/11/2011 07:19:01 | 20.907 | 9/5/2011 19:19:01 | 23.547 |
| 9/11/2011 07:59:01 | 23.597 | 9/5/2011 19:59:01 | 23.547 |
| 9/11/2011 08:39:01 | 25.597 | 9/5/2011 20:39:01 | 23.609 |
| 9/11/2011 09:19:01 | 27.533 | 9/5/2011 21:19:01 | 23.609 |
| 9/11/2011 09:59:01 | 28.595 | 9/5/2011 21:59:01 | 23.609 |
| 9/11/2011 10:39:01 | 29.968 | 9/5/2011 22:39:01 | 23.609 |
| 9/11/2011 11:19:01 | 31.902 | 9/5/2011 23:19:01 | 23.672 |
| 9/11/2011 11:59:01 | 32.463 | 9/5/2011 23:59:01 | 23.672 |
| 9/11/2011 12:39:01 | 33.149 | 9/6/2011 00:39:01 | 23.672 |
| 9/11/2011 13:19:01 | 34.520 | 9/6/2011 01:19:01 | 23.672 |
| 9/11/2011 13:59:01 | 35.454 | 9/6/2011 01:59:01 | 23.672 |
| 9/11/2011 14:39:01 | 34.956 | 9/6/2011 02:39:01 | 23.672 |
| 9/11/2011 15:19:01 | 33.772 | 9/6/2011 03:19:01 | 23.672 |
| 9/11/2011 15:59:01 | 32.463 | 9/6/2011 03:59:01 | 23.609 |
| 9/11/2011 16:39:01 | 31.153 | 9/6/2011 04:39:01 | 23.609 |
| 9/11/2011 17:19:01 | 29.281 | 9/6/2011 05:19:01 | 23.609 |
| 9/11/2011 17:59:01 | 27.034 | 9/6/2011 05:59:01 | 23.609 |
| 9/11/2011 18:39:01 | 24.972 | 9/6/2011 06:39:01 | 23.609 |
| 9/11/2011 19:19:01 | 22.346 | 9/6/2011 07:19:01 | 23.609 |
| 9/11/2011 19:59:01 | 20.657 | 9/6/2011 07:59:01 | 23.547 |
| 9/11/2011 20:39:01 | 20.156 | 9/6/2011 08:39:01 | 23.547 |

|                    |        |                   |        |
|--------------------|--------|-------------------|--------|
| 9/11/2011 21:19:01 | 20.907 | 9/6/2011 09:19:01 | 23.547 |
| 9/11/2011 21:59:01 | 21.095 | 9/6/2011 09:59:01 | 23.484 |
| 9/11/2011 22:39:01 | 19.843 | 9/6/2011 10:39:01 | 23.484 |
| 9/11/2011 23:19:01 | 18.842 | 9/6/2011 11:19:01 | 23.484 |
| 9/11/2011 23:59:01 | 17.527 | 9/6/2011 11:59:01 | 23.421 |
| 9/12/2011 00:39:01 | 16.649 | 9/6/2011 12:39:01 | 23.421 |
| 9/12/2011 01:19:01 | 15.835 | 9/6/2011 13:19:01 | 23.421 |
| 9/12/2011 01:59:01 | 16.336 | 9/6/2011 13:59:01 | 23.421 |
| 9/12/2011 02:39:01 | 17.652 | 9/6/2011 14:39:01 | 23.484 |
| 9/12/2011 03:19:01 | 16.649 | 9/6/2011 15:19:01 | 23.484 |
| 9/12/2011 03:59:01 | 17.401 | 9/6/2011 15:59:01 | 23.484 |
| 9/12/2011 04:39:01 | 15.898 | 9/6/2011 16:39:01 | 23.547 |
| 9/12/2011 05:19:01 | 14.832 | 9/6/2011 17:19:01 | 23.547 |
| 9/12/2011 05:59:01 | 14.142 | 9/6/2011 17:59:01 | 23.609 |
| 9/12/2011 06:39:01 | 14.393 | 9/6/2011 18:39:01 | 23.609 |
| 9/12/2011 07:19:01 | 17.151 | 9/6/2011 19:19:01 | 23.609 |
| 9/12/2011 07:59:01 | 22.784 | 9/6/2011 19:59:01 | 23.672 |
| 9/12/2011 08:39:01 | 26.347 | 9/6/2011 20:39:01 | 23.672 |
| 9/12/2011 09:19:01 | 28.345 | 9/6/2011 21:19:01 | 23.672 |
| 9/12/2011 09:59:01 | 29.593 | 9/6/2011 21:59:01 | 23.672 |
| 9/12/2011 10:39:01 | 30.904 | 9/6/2011 22:39:01 | 23.734 |
| 9/12/2011 11:19:01 | 31.527 | 9/6/2011 23:19:01 | 23.734 |
| 9/12/2011 11:59:01 | 32.650 | 9/6/2011 23:59:01 | 23.672 |
| 9/12/2011 12:39:01 | 33.772 | 9/7/2011 00:39:01 | 23.672 |
| 9/12/2011 13:19:01 | 34.271 | 9/7/2011 01:19:01 | 23.672 |
| 9/12/2011 13:59:01 | 35.891 | 9/7/2011 01:59:01 | 23.672 |
| 9/12/2011 14:39:01 | 35.704 | 9/7/2011 02:39:01 | 23.672 |
| 9/12/2011 15:19:01 | 34.333 | 9/7/2011 03:19:01 | 23.609 |
| 9/12/2011 15:59:01 | 33.336 | 9/7/2011 03:59:01 | 23.609 |
| 9/12/2011 16:39:01 | 31.028 | 9/7/2011 04:39:01 | 23.609 |
| 9/12/2011 17:19:01 | 29.406 | 9/7/2011 05:19:01 | 23.547 |
| 9/12/2011 17:59:01 | 27.596 | 9/7/2011 05:59:01 | 23.547 |
| 9/12/2011 18:39:01 | 26.222 | 9/7/2011 06:39:01 | 23.547 |
| 9/12/2011 19:19:01 | 24.972 | 9/7/2011 07:19:01 | 23.484 |
| 9/12/2011 19:59:01 | 24.222 | 9/7/2011 07:59:01 | 23.484 |
| 9/12/2011 20:39:01 | 23.097 | 9/7/2011 08:39:01 | 23.421 |
| 9/12/2011 21:19:01 | 21.721 | 9/7/2011 09:19:01 | 23.421 |
| 9/12/2011 21:59:01 | 20.219 | 9/7/2011 09:59:01 | 23.359 |
| 9/12/2011 22:39:01 | 19.718 | 9/7/2011 10:39:01 | 23.359 |
| 9/12/2011 23:19:01 | 19.155 | 9/7/2011 11:19:01 | 23.359 |
| 9/12/2011 23:59:01 | 19.280 | 9/7/2011 11:59:01 | 23.296 |
| 9/13/2011 00:39:01 | 18.403 | 9/7/2011 12:39:01 | 23.296 |
| 9/13/2011 01:19:01 | 17.527 | 9/7/2011 13:19:01 | 23.359 |
| 9/13/2011 01:59:01 | 16.587 | 9/7/2011 13:59:01 | 23.359 |
| 9/13/2011 02:39:01 | 16.775 | 9/7/2011 14:39:01 | 23.359 |
| 9/13/2011 03:19:01 | 16.274 | 9/7/2011 15:19:01 | 23.421 |
| 9/13/2011 03:59:01 | 16.274 | 9/7/2011 15:59:01 | 23.421 |
| 9/13/2011 04:39:01 | 16.837 | 9/7/2011 16:39:01 | 23.484 |
| 9/13/2011 05:19:01 | 16.086 | 9/7/2011 17:19:01 | 23.484 |
| 9/13/2011 05:59:01 | 15.960 | 9/7/2011 17:59:01 | 23.547 |

|                    |        |                   |        |
|--------------------|--------|-------------------|--------|
| 9/13/2011 06:39:01 | 16.775 | 9/7/2011 18:39:01 | 23.547 |
| 9/13/2011 07:19:01 | 21.220 | 9/7/2011 19:19:01 | 23.609 |
| 9/13/2011 07:59:01 | 24.534 | 9/7/2011 19:59:01 | 23.609 |
| 9/13/2011 08:39:01 | 27.471 | 9/7/2011 20:39:01 | 23.609 |
| 9/13/2011 09:19:01 | 29.281 | 9/7/2011 21:19:01 | 23.672 |
| 9/13/2011 09:59:01 | 30.342 | 9/7/2011 21:59:01 | 23.672 |
| 9/13/2011 10:39:01 | 31.715 | 9/7/2011 22:39:01 | 23.672 |
| 9/13/2011 11:19:01 | 32.962 | 9/7/2011 23:19:01 | 23.672 |
| 9/13/2011 11:59:01 | 34.208 | 9/7/2011 23:59:01 | 23.672 |
| 9/13/2011 12:39:01 | 34.831 | 9/8/2011 00:39:01 | 23.672 |
| 9/13/2011 13:19:01 | 35.081 | 9/8/2011 01:19:01 | 23.672 |
| 9/13/2011 13:59:01 | 36.015 | 9/8/2011 01:59:01 | 23.672 |
| 9/13/2011 14:39:01 | 35.579 | 9/8/2011 02:39:01 | 23.609 |
| 9/13/2011 15:19:01 | 34.458 | 9/8/2011 03:19:01 | 23.609 |
| 9/13/2011 15:59:01 | 33.211 | 9/8/2011 03:59:01 | 23.609 |
| 9/13/2011 16:39:01 | 31.715 | 9/8/2011 04:39:01 | 23.609 |
| 9/13/2011 17:19:01 | 30.155 | 9/8/2011 05:19:01 | 23.547 |
| 9/13/2011 17:59:01 | 28.657 | 9/8/2011 05:59:01 | 23.547 |
| 9/13/2011 18:39:01 | 27.283 | 9/8/2011 06:39:01 | 23.484 |
| 9/13/2011 19:19:01 | 25.909 | 9/8/2011 07:19:01 | 23.484 |
| 9/13/2011 19:59:01 | 25.659 | 9/8/2011 07:59:01 | 23.421 |
| 9/13/2011 20:39:01 | 24.972 | 9/8/2011 08:39:01 | 23.421 |
| 9/13/2011 21:19:01 | 24.097 | 9/8/2011 09:19:01 | 23.359 |
| 9/13/2011 21:59:01 | 23.159 | 9/8/2011 09:59:01 | 23.359 |
| 9/13/2011 22:39:01 | 22.659 | 9/8/2011 10:39:01 | 23.296 |
| 9/13/2011 23:19:01 | 21.157 | 9/8/2011 11:19:01 | 23.296 |
| 9/13/2011 23:59:01 | 21.220 | 9/8/2011 11:59:01 | 23.296 |
| 9/14/2011 00:39:01 | 20.594 | 9/8/2011 12:39:01 | 23.296 |
| 9/14/2011 01:19:01 | 19.968 | 9/8/2011 13:19:01 | 23.296 |
| 9/14/2011 01:59:01 | 19.593 | 9/8/2011 13:59:01 | 23.296 |
| 9/14/2011 02:39:01 | 20.031 | 9/8/2011 14:39:01 | 23.359 |
| 9/14/2011 03:19:01 | 19.968 | 9/8/2011 15:19:01 | 23.359 |
| 9/14/2011 03:59:01 | 19.718 | 9/8/2011 15:59:01 | 23.359 |
| 9/14/2011 04:39:01 | 19.280 | 9/8/2011 16:39:01 | 23.421 |
| 9/14/2011 05:19:01 | 19.343 | 9/8/2011 17:19:01 | 23.484 |
| 9/14/2011 05:59:01 | 19.280 | 9/8/2011 17:59:01 | 23.484 |
| 9/14/2011 06:39:01 | 19.656 | 9/8/2011 18:39:01 | 23.547 |
| 9/14/2011 07:19:01 | 21.908 | 9/8/2011 19:19:01 | 23.547 |
| 9/14/2011 07:59:01 | 24.097 | 9/8/2011 19:59:01 | 23.609 |
| 9/14/2011 08:39:01 | 27.159 | 9/8/2011 20:39:01 | 23.609 |
| 9/14/2011 09:19:01 | 28.532 | 9/8/2011 21:19:01 | 23.609 |
| 9/14/2011 09:59:01 | 29.968 | 9/8/2011 21:59:01 | 23.672 |
| 9/14/2011 10:39:01 | 31.340 | 9/8/2011 22:39:01 | 23.672 |
| 9/14/2011 11:19:01 | 32.899 | 9/8/2011 23:19:01 | 23.672 |
| 9/14/2011 11:59:01 | 34.084 | 9/8/2011 23:59:01 | 23.672 |
| 9/14/2011 12:39:01 | 34.707 | 9/9/2011 00:39:01 | 23.672 |
| 9/14/2011 13:19:01 | 35.018 | 9/9/2011 01:19:01 | 23.672 |
| 9/14/2011 13:59:01 | 35.704 | 9/9/2011 01:59:01 | 23.672 |
| 9/14/2011 14:39:01 | 35.454 | 9/9/2011 02:39:01 | 23.672 |
| 9/14/2011 15:19:01 | 34.021 | 9/9/2011 03:19:01 | 23.672 |



|                    |        |                    |        |
|--------------------|--------|--------------------|--------|
| 9/14/2011 15:59:01 | 33.024 | 9/9/2011 03:59:01  | 23.672 |
| 9/14/2011 16:39:01 | 31.777 | 9/9/2011 04:39:01  | 23.609 |
| 9/14/2011 17:19:01 | 29.531 | 9/9/2011 05:19:01  | 23.609 |
| 9/14/2011 17:59:01 | 27.221 | 9/9/2011 05:59:01  | 23.609 |
| 9/14/2011 18:39:01 | 26.034 | 9/9/2011 06:39:01  | 23.547 |
| 9/14/2011 19:19:01 | 24.534 | 9/9/2011 07:19:01  | 23.547 |
| 9/14/2011 19:59:01 | 24.222 | 9/9/2011 07:59:01  | 23.484 |
| 9/14/2011 20:39:01 | 23.097 | 9/9/2011 08:39:01  | 23.484 |
| 9/14/2011 21:19:01 | 21.971 | 9/9/2011 09:19:01  | 23.421 |
| 9/14/2011 21:59:01 | 20.344 | 9/9/2011 09:59:01  | 23.359 |
| 9/14/2011 22:39:01 | 19.343 | 9/9/2011 10:39:01  | 23.359 |
| 9/14/2011 23:19:01 | 18.278 | 9/9/2011 11:19:01  | 23.359 |
| 9/14/2011 23:59:01 | 17.589 | 9/9/2011 11:59:01  | 23.296 |
| 9/15/2011 00:39:01 | 17.339 | 9/9/2011 12:39:01  | 23.296 |
| 9/15/2011 01:19:01 | 16.837 | 9/9/2011 13:19:01  | 23.296 |
| 9/15/2011 01:59:01 | 16.023 | 9/9/2011 13:59:01  | 23.296 |
| 9/15/2011 02:39:01 | 15.208 | 9/9/2011 14:39:01  | 23.359 |
| 9/15/2011 03:19:01 | 14.707 | 9/9/2011 15:19:01  | 23.359 |
| 9/15/2011 03:59:01 | 14.330 | 9/9/2011 15:59:01  | 23.421 |
| 9/15/2011 04:39:01 | 14.456 | 9/9/2011 16:39:01  | 23.421 |
| 9/15/2011 05:19:01 | 14.957 | 9/9/2011 17:19:01  | 23.484 |
| 9/15/2011 05:59:01 | 15.459 | 9/9/2011 17:59:01  | 23.484 |
| 9/15/2011 06:39:01 | 16.399 | 9/9/2011 18:39:01  | 23.484 |
| 9/15/2011 07:19:01 | 20.469 | 9/9/2011 19:19:01  | 23.547 |
| 9/15/2011 07:59:01 | 25.284 | 9/9/2011 19:59:01  | 23.547 |
| 9/15/2011 08:39:01 | 28.657 | 9/9/2011 20:39:01  | 23.609 |
| 9/15/2011 09:19:01 | 29.968 | 9/9/2011 21:19:01  | 23.609 |
| 9/15/2011 09:59:01 | 30.654 | 9/9/2011 21:59:01  | 23.609 |
| 9/15/2011 10:39:01 | 32.026 | 9/9/2011 22:39:01  | 23.609 |
| 9/15/2011 11:19:01 | 32.962 | 9/9/2011 23:19:01  | 23.609 |
| 9/15/2011 11:59:01 | 32.650 | 9/9/2011 23:59:01  | 23.609 |
| 9/15/2011 12:39:01 | 32.837 | 9/10/2011 00:39:01 | 23.547 |
| 9/15/2011 13:19:01 | 32.401 | 9/10/2011 01:19:01 | 23.547 |
| 9/15/2011 13:59:01 | 33.710 | 9/10/2011 01:59:01 | 23.547 |
| 9/15/2011 14:39:01 | 34.271 | 9/10/2011 02:39:01 | 23.484 |
| 9/15/2011 15:19:01 | 31.715 | 9/10/2011 03:19:01 | 23.484 |
| 9/15/2011 15:59:01 | 31.715 | 9/10/2011 03:59:01 | 23.484 |
| 9/15/2011 16:39:01 | 29.968 | 9/10/2011 04:39:01 | 23.421 |
| 9/15/2011 17:19:01 | 28.969 | 9/10/2011 05:19:01 | 23.421 |
| 9/15/2011 17:59:01 | 27.346 | 9/10/2011 05:59:01 | 23.359 |
| 9/15/2011 18:39:01 | 25.409 | 9/10/2011 06:39:01 | 23.359 |
| 9/15/2011 19:19:01 | 25.972 | 9/10/2011 07:19:01 | 23.296 |
| 9/15/2011 19:59:01 | 25.597 | 9/10/2011 07:59:01 | 23.234 |
| 9/15/2011 20:39:01 | 25.097 | 9/10/2011 08:39:01 | 23.234 |
| 9/15/2011 21:19:01 | 24.097 | 9/10/2011 09:19:01 | 23.171 |
| 9/15/2011 21:59:01 | 24.347 | 9/10/2011 09:59:01 | 23.171 |
| 9/15/2011 22:39:01 | 24.222 | 9/10/2011 10:39:01 | 23.109 |
| 9/15/2011 23:19:01 | 23.409 | 9/10/2011 11:19:01 | 23.109 |
| 9/15/2011 23:59:01 | 22.909 | 9/10/2011 11:59:01 | 23.109 |
| 9/16/2011 00:39:01 | 20.094 | 9/10/2011 12:39:01 | 23.109 |

|                    |        |                    |        |
|--------------------|--------|--------------------|--------|
| 9/16/2011 01:19:01 | 19.906 | 9/10/2011 13:19:01 | 23.109 |
| 9/16/2011 01:59:01 | 19.843 | 9/10/2011 13:59:01 | 23.109 |
| 9/16/2011 02:39:01 | 19.656 | 9/10/2011 14:39:01 | 23.109 |
| 9/16/2011 03:19:01 | 19.343 | 9/10/2011 15:19:01 | 23.171 |
| 9/16/2011 03:59:01 | 19.029 | 9/10/2011 15:59:01 | 23.171 |
| 9/16/2011 04:39:01 | 18.654 | 9/10/2011 16:39:01 | 23.234 |
| 9/16/2011 05:19:01 | 18.403 | 9/10/2011 17:19:01 | 23.234 |
| 9/16/2011 05:59:01 | 18.153 | 9/10/2011 17:59:01 | 23.296 |
| 9/16/2011 06:39:01 | 18.842 | 9/10/2011 18:39:01 | 23.296 |
| 9/16/2011 07:19:01 | 21.157 | 9/10/2011 19:19:01 | 23.359 |
| 9/16/2011 07:59:01 | 24.159 | 9/10/2011 19:59:01 | 23.359 |
| 9/16/2011 08:39:01 | 27.471 | 9/10/2011 20:39:01 | 23.359 |
| 9/16/2011 09:19:01 | 29.718 | 9/10/2011 21:19:01 | 23.421 |
| 9/16/2011 09:59:01 | 31.527 | 9/10/2011 21:59:01 | 23.421 |
| 9/16/2011 10:39:01 | 31.964 | 9/10/2011 22:39:01 | 23.421 |
| 9/16/2011 11:19:01 | 33.336 | 9/10/2011 23:19:01 | 23.421 |
| 9/16/2011 11:59:01 | 33.959 | 9/10/2011 23:59:01 | 23.421 |
| 9/16/2011 12:39:01 | 35.143 | 9/11/2011 00:39:01 | 23.421 |
| 9/16/2011 13:19:01 | 35.704 | 9/11/2011 01:19:01 | 23.421 |
| 9/16/2011 13:59:01 | 35.081 | 9/11/2011 01:59:01 | 23.421 |
| 9/16/2011 14:39:01 | 36.700 | 9/11/2011 02:39:01 | 23.359 |
| 9/16/2011 15:19:01 | 34.021 | 9/11/2011 03:19:01 | 23.359 |
| 9/16/2011 15:59:01 | 33.460 | 9/11/2011 03:59:01 | 23.359 |
| 9/16/2011 16:39:01 | 31.340 | 9/11/2011 04:39:01 | 23.359 |
| 9/16/2011 17:19:01 | 29.905 | 9/11/2011 05:19:01 | 23.296 |
| 9/16/2011 17:59:01 | 28.220 | 9/11/2011 05:59:01 | 23.296 |
| 9/16/2011 18:39:01 | 27.159 | 9/11/2011 06:39:01 | 23.296 |
| 9/16/2011 19:19:01 | 25.347 | 9/11/2011 07:19:01 | 23.234 |
| 9/16/2011 19:59:01 | 22.971 | 9/11/2011 07:59:01 | 23.234 |
| 9/16/2011 20:39:01 | 21.908 | 9/11/2011 08:39:01 | 23.234 |
| 9/16/2011 21:19:01 | 21.220 | 9/11/2011 09:19:01 | 23.171 |
| 9/16/2011 21:59:01 | 20.719 | 9/11/2011 09:59:01 | 23.171 |
| 9/16/2011 22:39:01 | 20.094 | 9/11/2011 10:39:01 | 23.109 |
| 9/16/2011 23:19:01 | 19.343 | 9/11/2011 11:19:01 | 23.109 |
| 9/16/2011 23:59:01 | 18.591 | 9/11/2011 11:59:01 | 23.109 |
| 9/17/2011 00:39:01 | 18.090 | 9/11/2011 12:39:01 | 23.109 |
| 9/17/2011 01:19:01 | 18.215 | 9/11/2011 13:19:01 | 23.109 |
| 9/17/2011 01:59:01 | 17.902 | 9/11/2011 13:59:01 | 23.109 |
| 9/17/2011 02:39:01 | 17.527 | 9/11/2011 14:39:01 | 23.109 |
| 9/17/2011 03:19:01 | 17.527 | 9/11/2011 15:19:01 | 23.171 |
| 9/17/2011 03:59:01 | 17.527 | 9/11/2011 15:59:01 | 23.171 |
| 9/17/2011 04:39:01 | 17.652 | 9/11/2011 16:39:01 | 23.234 |
| 9/17/2011 05:19:01 | 18.028 | 9/11/2011 17:19:01 | 23.234 |
| 9/17/2011 05:59:01 | 18.779 | 9/11/2011 17:59:01 | 23.296 |
| 9/17/2011 06:39:01 | 19.217 | 9/11/2011 18:39:01 | 23.296 |
| 9/17/2011 07:19:01 | 20.782 | 9/11/2011 19:19:01 | 23.359 |
| 9/17/2011 07:59:01 | 24.722 | 9/11/2011 19:59:01 | 23.359 |
| 9/17/2011 08:39:01 | 25.222 | 9/11/2011 20:39:01 | 23.359 |
| 9/17/2011 09:19:01 | 26.659 | 9/11/2011 21:19:01 | 23.421 |
| 9/17/2011 09:59:01 | 29.905 | 9/11/2011 21:59:01 | 23.421 |

|                    |        |                    |        |
|--------------------|--------|--------------------|--------|
| 9/17/2011 10:39:01 | 32.276 | 9/11/2011 22:39:01 | 23.421 |
| 9/17/2011 11:19:01 | 34.271 | 9/11/2011 23:19:01 | 23.421 |
| 9/17/2011 11:59:01 | 35.081 | 9/11/2011 23:59:01 | 23.421 |
| 9/17/2011 12:39:01 | 36.451 | 9/12/2011 00:39:01 | 23.421 |
| 9/17/2011 13:19:01 | 36.576 | 9/12/2011 01:19:01 | 23.421 |
| 9/17/2011 13:59:01 | 35.891 | 9/12/2011 01:59:01 | 23.421 |
| 9/17/2011 14:39:01 | 35.205 | 9/12/2011 02:39:01 | 23.359 |
| 9/17/2011 15:19:01 | 35.018 | 9/12/2011 03:19:01 | 23.359 |
| 9/17/2011 15:59:01 | 34.395 | 9/12/2011 03:59:01 | 23.359 |
| 9/17/2011 16:39:01 | 33.647 | 9/12/2011 04:39:01 | 23.359 |
| 9/17/2011 17:19:01 | 32.213 | 9/12/2011 05:19:01 | 23.296 |
| 9/17/2011 17:59:01 | 28.969 | 9/12/2011 05:59:01 | 23.296 |
| 9/17/2011 18:39:01 | 26.909 | 9/12/2011 06:39:01 | 23.234 |
| 9/17/2011 19:19:01 | 26.909 | 9/12/2011 07:19:01 | 23.234 |
| 9/17/2011 19:59:01 | 26.222 | 9/12/2011 07:59:01 | 23.234 |
| 9/17/2011 20:39:01 | 25.409 | 9/12/2011 08:39:01 | 23.171 |
| 9/17/2011 21:19:01 | 24.722 | 9/12/2011 09:19:01 | 23.171 |
| 9/17/2011 21:59:01 | 23.409 | 9/12/2011 09:59:01 | 23.109 |
| 9/17/2011 22:39:01 | 23.722 | 9/12/2011 10:39:01 | 23.109 |
| 9/17/2011 23:19:01 | 24.409 | 9/12/2011 11:19:01 | 23.109 |
| 9/17/2011 23:59:01 | 22.284 | 9/12/2011 11:59:01 | 23.046 |
| 9/18/2011 00:39:01 | 21.408 | 9/12/2011 12:39:01 | 23.046 |
| 9/18/2011 01:19:01 | 21.721 | 9/12/2011 13:19:01 | 23.109 |
| 9/18/2011 01:59:01 | 21.658 | 9/12/2011 13:59:01 | 23.109 |
| 9/18/2011 02:39:01 | 20.719 | 9/12/2011 14:39:01 | 23.109 |
| 9/18/2011 03:19:01 | 19.906 | 9/12/2011 15:19:01 | 23.171 |
| 9/18/2011 03:59:01 | 19.781 | 9/12/2011 15:59:01 | 23.171 |
| 9/18/2011 04:39:01 | 18.904 | 9/12/2011 16:39:01 | 23.234 |
| 9/18/2011 05:19:01 | 18.466 | 9/12/2011 17:19:01 | 23.234 |
| 9/18/2011 05:59:01 | 18.654 | 9/12/2011 17:59:01 | 23.296 |
| 9/18/2011 06:39:01 | 19.217 | 9/12/2011 18:39:01 | 23.359 |
| 9/18/2011 07:19:01 | 21.095 | 9/12/2011 19:19:01 | 23.359 |
| 9/18/2011 07:59:01 | 23.534 | 9/12/2011 19:59:01 | 23.359 |
| 9/18/2011 08:39:01 | 28.532 | 9/12/2011 20:39:01 | 23.421 |
| 9/18/2011 09:19:01 | 29.843 | 9/12/2011 21:19:01 | 23.421 |
| 9/18/2011 09:59:01 | 31.153 | 9/12/2011 21:59:01 | 23.484 |
| 9/18/2011 10:39:01 | 32.276 | 9/12/2011 22:39:01 | 23.484 |
| 9/18/2011 11:19:01 | 33.585 | 9/12/2011 23:19:01 | 23.484 |
| 9/18/2011 11:59:01 | 35.330 | 9/12/2011 23:59:01 | 23.484 |
| 9/18/2011 12:39:01 | 33.398 | 9/13/2011 00:39:01 | 23.484 |
| 9/18/2011 13:19:01 | 36.015 | 9/13/2011 01:19:01 | 23.484 |
| 9/18/2011 13:59:01 | 37.074 | 9/13/2011 01:59:01 | 23.484 |
| 9/18/2011 14:39:01 | 36.326 | 9/13/2011 02:39:01 | 23.484 |
| 9/18/2011 15:19:01 | 35.081 | 9/13/2011 03:19:01 | 23.484 |
| 9/18/2011 15:59:01 | 33.772 | 9/13/2011 03:59:01 | 23.421 |
| 9/18/2011 16:39:01 | 32.588 | 9/13/2011 04:39:01 | 23.421 |
| 9/18/2011 17:19:01 | 31.216 | 9/13/2011 05:19:01 | 23.421 |
| 9/18/2011 17:59:01 | 29.094 | 9/13/2011 05:59:01 | 23.359 |
| 9/18/2011 18:39:01 | 27.159 | 9/13/2011 06:39:01 | 23.359 |
| 9/18/2011 19:19:01 | 25.972 | 9/13/2011 07:19:01 | 23.296 |

|                    |        |                    |        |
|--------------------|--------|--------------------|--------|
| 9/18/2011 19:59:01 | 25.222 | 9/13/2011 07:59:01 | 23.296 |
| 9/18/2011 20:39:01 | 24.534 | 9/13/2011 08:39:01 | 23.234 |
| 9/18/2011 21:19:01 | 23.909 | 9/13/2011 09:19:01 | 23.234 |
| 9/18/2011 21:59:01 | 22.596 | 9/13/2011 09:59:01 | 23.234 |
| 9/18/2011 22:39:01 | 21.783 | 9/13/2011 10:39:01 | 23.171 |
| 9/18/2011 23:19:01 | 21.408 | 9/13/2011 11:19:01 | 23.171 |
| 9/18/2011 23:59:01 | 20.469 | 9/13/2011 11:59:01 | 23.171 |
| 9/19/2011 00:39:01 | 19.656 | 9/13/2011 12:39:01 | 23.171 |
| 9/19/2011 01:19:01 | 19.843 | 9/13/2011 13:19:01 | 23.171 |
| 9/19/2011 01:59:01 | 17.965 | 9/13/2011 13:59:01 | 23.171 |
| 9/19/2011 02:39:01 | 17.965 | 9/13/2011 14:39:01 | 23.234 |
| 9/19/2011 03:19:01 | 16.274 | 9/13/2011 15:19:01 | 23.234 |
| 9/19/2011 03:59:01 | 15.835 | 9/13/2011 15:59:01 | 23.296 |
| 9/19/2011 04:39:01 | 17.652 | 9/13/2011 16:39:01 | 23.359 |
| 9/19/2011 05:19:01 | 17.401 | 9/13/2011 17:19:01 | 23.359 |
| 9/19/2011 05:59:01 | 17.276 | 9/13/2011 17:59:01 | 23.421 |
| 9/19/2011 06:39:01 | 18.403 | 9/13/2011 18:39:01 | 23.484 |
| 9/19/2011 07:19:01 | 21.032 | 9/13/2011 19:19:01 | 23.484 |
| 9/19/2011 07:59:01 | 23.909 | 9/13/2011 19:59:01 | 23.547 |
| 9/19/2011 08:39:01 | 27.658 | 9/13/2011 20:39:01 | 23.547 |
| 9/19/2011 09:19:01 | 28.220 | 9/13/2011 21:19:01 | 23.547 |
| 9/19/2011 09:59:01 | 30.529 | 9/13/2011 21:59:01 | 23.547 |
| 9/19/2011 10:39:01 | 31.091 | 9/13/2011 22:39:01 | 23.609 |
| 9/19/2011 11:19:01 | 32.899 | 9/13/2011 23:19:01 | 23.609 |
| 9/19/2011 11:59:01 | 33.149 | 9/13/2011 23:59:01 | 23.609 |
| 9/19/2011 12:39:01 | 33.710 | 9/14/2011 00:39:01 | 23.609 |
| 9/19/2011 13:19:01 | 34.831 | 9/14/2011 01:19:01 | 23.609 |
| 9/19/2011 13:59:01 | 35.953 | 9/14/2011 01:59:01 | 23.609 |
| 9/19/2011 14:39:01 | 33.398 | 9/14/2011 02:39:01 | 23.609 |
| 9/19/2011 15:19:01 | 33.460 | 9/14/2011 03:19:01 | 23.609 |
| 9/19/2011 15:59:01 | 32.026 | 9/14/2011 03:59:01 | 23.547 |
| 9/19/2011 16:39:01 | 30.841 | 9/14/2011 04:39:01 | 23.547 |
| 9/19/2011 17:19:01 | 28.720 | 9/14/2011 05:19:01 | 23.547 |
| 9/19/2011 17:59:01 | 26.596 | 9/14/2011 05:59:01 | 23.484 |
| 9/19/2011 18:39:01 | 25.534 | 9/14/2011 06:39:01 | 23.484 |
| 9/19/2011 19:19:01 | 26.034 | 9/14/2011 07:19:01 | 23.484 |
| 9/19/2011 19:59:01 | 26.159 | 9/14/2011 07:59:01 | 23.421 |
| 9/19/2011 20:39:01 | 25.659 | 9/14/2011 08:39:01 | 23.421 |
| 9/19/2011 21:19:01 | 25.097 | 9/14/2011 09:19:01 | 23.421 |
| 9/19/2011 21:59:01 | 25.034 | 9/14/2011 09:59:01 | 23.359 |
| 9/19/2011 22:39:01 | 23.847 | 9/14/2011 10:39:01 | 23.359 |
| 9/19/2011 23:19:01 | 22.033 | 9/14/2011 11:19:01 | 23.359 |
| 9/19/2011 23:59:01 | 20.407 | 9/14/2011 11:59:01 | 23.296 |
| 9/20/2011 00:39:01 | 19.343 | 9/14/2011 12:39:01 | 23.296 |
| 9/20/2011 01:19:01 | 18.215 | 9/14/2011 13:19:01 | 23.296 |
| 9/20/2011 01:59:01 | 17.527 | 9/14/2011 13:59:01 | 23.359 |
| 9/20/2011 02:39:01 | 16.900 | 9/14/2011 14:39:01 | 23.359 |
| 9/20/2011 03:19:01 | 16.023 | 9/14/2011 15:19:01 | 23.359 |
| 9/20/2011 03:59:01 | 15.459 | 9/14/2011 15:59:01 | 23.421 |
| 9/20/2011 04:39:01 | 14.769 | 9/14/2011 16:39:01 | 23.421 |

|                    |        |                    |        |
|--------------------|--------|--------------------|--------|
| 9/20/2011 05:19:01 | 14.393 | 9/14/2011 17:19:01 | 23.484 |
| 9/20/2011 05:59:01 | 14.393 | 9/14/2011 17:59:01 | 23.547 |
| 9/20/2011 06:39:01 | 16.086 | 9/14/2011 18:39:01 | 23.547 |
| 9/20/2011 07:19:01 | 21.908 | 9/14/2011 19:19:01 | 23.609 |
| 9/20/2011 07:59:01 | 26.034 | 9/14/2011 19:59:01 | 23.609 |
| 9/20/2011 08:39:01 | 29.531 | 9/14/2011 20:39:01 | 23.609 |
| 9/20/2011 09:19:01 | 30.717 | 9/14/2011 21:19:01 | 23.672 |
| 9/20/2011 09:59:01 | 32.338 | 9/14/2011 21:59:01 | 23.672 |
| 9/20/2011 10:39:01 | 33.460 | 9/14/2011 22:39:01 | 23.672 |
| 9/20/2011 11:19:01 | 34.707 | 9/14/2011 23:19:01 | 23.672 |
| 9/20/2011 11:59:01 | 35.454 | 9/14/2011 23:59:01 | 23.672 |
| 9/20/2011 12:39:01 | 35.704 | 9/15/2011 00:39:01 | 23.672 |
| 9/20/2011 13:19:01 | 36.825 | 9/15/2011 01:19:01 | 23.672 |
| 9/20/2011 13:59:01 | 38.132 | 9/15/2011 01:59:01 | 23.672 |
| 9/20/2011 14:39:01 | 38.008 | 9/15/2011 02:39:01 | 23.672 |
| 9/20/2011 15:19:01 | 35.891 | 9/15/2011 03:19:01 | 23.609 |
| 9/20/2011 15:59:01 | 35.579 | 9/15/2011 03:59:01 | 23.609 |
| 9/20/2011 16:39:01 | 33.772 | 9/15/2011 04:39:01 | 23.609 |
| 9/20/2011 17:19:01 | 32.463 | 9/15/2011 05:19:01 | 23.547 |
| 9/20/2011 17:59:01 | 30.280 | 9/15/2011 05:59:01 | 23.547 |
| 9/20/2011 18:39:01 | 28.158 | 9/15/2011 06:39:01 | 23.484 |
| 9/20/2011 19:19:01 | 27.034 | 9/15/2011 07:19:01 | 23.484 |
| 9/20/2011 19:59:01 | 25.347 | 9/15/2011 07:59:01 | 23.421 |
| 9/20/2011 20:39:01 | 24.159 | 9/15/2011 08:39:01 | 23.421 |
| 9/20/2011 21:19:01 | 22.909 | 9/15/2011 09:19:01 | 23.359 |
| 9/20/2011 21:59:01 | 21.721 | 9/15/2011 09:59:01 | 23.359 |
| 9/20/2011 22:39:01 | 21.095 | 9/15/2011 10:39:01 | 23.296 |
| 9/20/2011 23:19:01 | 20.845 | 9/15/2011 11:19:01 | 23.296 |
| 9/20/2011 23:59:01 | 20.719 | 9/15/2011 11:59:01 | 23.296 |
| 9/21/2011 00:39:01 | 19.968 | 9/15/2011 12:39:01 | 23.296 |
| 9/21/2011 01:19:01 | 19.468 | 9/15/2011 13:19:01 | 23.296 |
| 9/21/2011 01:59:01 | 19.029 | 9/15/2011 13:59:01 | 23.359 |
| 9/21/2011 02:39:01 | 18.529 | 9/15/2011 14:39:01 | 23.359 |
| 9/21/2011 03:19:01 | 18.403 | 9/15/2011 15:19:01 | 23.421 |
| 9/21/2011 03:59:01 | 17.965 | 9/15/2011 15:59:01 | 23.421 |
| 9/21/2011 04:39:01 | 17.464 | 9/15/2011 16:39:01 | 23.484 |
| 9/21/2011 05:19:01 | 17.151 | 9/15/2011 17:19:01 | 23.547 |
| 9/21/2011 05:59:01 | 16.837 | 9/15/2011 17:59:01 | 23.547 |
| 9/21/2011 06:39:01 | 17.088 | 9/15/2011 18:39:01 | 23.609 |
| 9/21/2011 07:19:01 | 20.281 | 9/15/2011 19:19:01 | 23.609 |
| 9/21/2011 07:59:01 | 26.534 | 9/15/2011 19:59:01 | 23.672 |
| 9/21/2011 08:39:01 | 30.592 | 9/15/2011 20:39:01 | 23.672 |
| 9/21/2011 09:19:01 | 31.465 | 9/15/2011 21:19:01 | 23.734 |
| 9/21/2011 09:59:01 | 34.520 | 9/15/2011 21:59:01 | 23.734 |
| 9/21/2011 10:39:01 | 35.891 | 9/15/2011 22:39:01 | 23.734 |
| 9/21/2011 11:19:01 | 37.261 | 9/15/2011 23:19:01 | 23.734 |
| 9/21/2011 11:59:01 | 38.443 | 9/15/2011 23:59:01 | 23.797 |
| 9/21/2011 12:39:01 | 38.257 | 9/16/2011 00:39:01 | 23.797 |
| 9/21/2011 13:19:01 | 36.513 | 9/16/2011 01:19:01 | 23.797 |
| 9/21/2011 13:59:01 | 36.389 | 9/16/2011 01:59:01 | 23.797 |

|                    |        |                    |        |
|--------------------|--------|--------------------|--------|
| 9/21/2011 14:39:01 | 37.385 | 9/16/2011 02:39:01 | 23.797 |
| 9/21/2011 15:19:01 | 36.077 | 9/16/2011 03:19:01 | 23.734 |
| 9/21/2011 15:46:01 | 36.037 | 9/16/2011 03:59:01 | 23.734 |
| 9/21/2011 16:16:01 | 35.476 | 9/16/2011 04:39:01 | 23.734 |
| 9/21/2011 16:46:01 | 34.541 | 9/16/2011 05:19:01 | 23.734 |
| 9/21/2011 17:16:01 | 33.482 | 9/16/2011 05:59:01 | 23.734 |
| 9/21/2011 17:46:01 | 31.798 | 9/16/2011 06:39:01 | 23.734 |
| 9/21/2011 18:16:01 | 30.550 | 9/16/2011 07:19:01 | 23.672 |
| 9/21/2011 18:46:01 | 28.990 | 9/16/2011 07:59:01 | 23.672 |
| 9/21/2011 19:16:01 | 27.991 | 9/16/2011 08:39:01 | 23.672 |
| 9/21/2011 19:46:01 | 27.616 | 9/16/2011 09:19:01 | 23.609 |
| 9/21/2011 20:16:01 | 27.116 | 9/16/2011 09:59:01 | 23.609 |
| 9/21/2011 20:46:01 | 26.617 | 9/16/2011 10:39:01 | 23.609 |
| 9/21/2011 21:16:01 | 26.554 | 9/16/2011 11:19:01 | 23.547 |
| 9/21/2011 21:46:01 | 26.367 | 9/16/2011 11:59:01 | 23.547 |
| 9/21/2011 22:16:01 | 25.804 | 9/16/2011 12:39:01 | 23.547 |
| 9/21/2011 22:46:01 | 25.304 | 9/16/2011 13:19:01 | 23.547 |
| 9/21/2011 23:16:01 | 24.617 | 9/16/2011 13:59:01 | 23.609 |
| 9/21/2011 23:46:01 | 24.367 | 9/16/2011 14:39:01 | 23.609 |
| 9/22/2011 00:16:01 | 24.117 | 9/16/2011 15:19:01 | 23.672 |
| 9/22/2011 00:46:01 | 23.804 | 9/16/2011 15:59:01 | 23.672 |
| 9/22/2011 01:16:01 | 23.241 | 9/16/2011 16:39:01 | 23.734 |
| 9/22/2011 01:46:01 | 22.741 | 9/16/2011 17:19:01 | 23.734 |
| 9/22/2011 02:16:01 | 22.428 | 9/16/2011 17:59:01 | 23.797 |
| 9/22/2011 02:46:01 | 21.990 | 9/16/2011 18:39:01 | 23.797 |
| 9/22/2011 03:16:01 | 21.615 | 9/16/2011 19:19:01 | 23.859 |
| 9/22/2011 03:46:01 | 21.490 | 9/16/2011 19:59:01 | 23.859 |
| 9/22/2011 04:16:01 | 21.365 | 9/16/2011 20:39:01 | 23.922 |
| 9/22/2011 04:46:01 | 21.114 | 9/16/2011 21:19:01 | 23.922 |
| 9/22/2011 05:16:01 | 20.927 | 9/16/2011 21:59:01 | 23.922 |
| 9/22/2011 05:46:01 | 20.614 | 9/16/2011 22:39:01 | 23.984 |
| 9/22/2011 06:16:01 | 20.551 | 9/16/2011 23:19:01 | 23.984 |
| 9/22/2011 06:46:01 | 21.552 | 9/16/2011 23:59:01 | 23.984 |
| 9/22/2011 07:16:01 | 23.992 | 9/17/2011 00:39:01 | 23.984 |
| 9/22/2011 07:46:01 | 26.992 | 9/17/2011 01:19:01 | 23.984 |
| 9/22/2011 08:16:01 | 28.927 | 9/17/2011 01:59:01 | 23.922 |
| 9/22/2011 08:46:01 | 30.176 | 9/17/2011 02:39:01 | 23.922 |
| 9/22/2011 09:16:01 | 31.611 | 9/17/2011 03:19:01 | 23.922 |
| 9/22/2011 09:46:01 | 32.422 | 9/17/2011 03:59:01 | 23.922 |
| 9/22/2011 10:16:01 | 33.606 | 9/17/2011 04:39:01 | 23.859 |
| 9/22/2011 10:46:01 | 35.165 | 9/17/2011 05:19:01 | 23.859 |
| 9/22/2011 11:16:01 | 36.099 | 9/17/2011 05:59:01 | 23.859 |
| 9/22/2011 11:46:01 | 37.033 | 9/17/2011 06:39:01 | 23.797 |
| 9/22/2011 12:16:01 | 37.345 | 9/17/2011 07:19:01 | 23.797 |
| 9/22/2011 12:46:01 | 37.843 | 9/17/2011 07:59:01 | 23.734 |
| 9/22/2011 13:16:01 | 37.967 | 9/17/2011 08:39:01 | 23.734 |
| 9/22/2011 13:46:01 | 38.465 | 9/17/2011 09:19:01 | 23.672 |
| 9/22/2011 14:16:01 | 38.341 | 9/17/2011 09:59:01 | 23.672 |
| 9/22/2011 14:46:01 | 38.092 | 9/17/2011 10:39:01 | 23.672 |
| 9/22/2011 15:16:01 | 38.030 | 9/17/2011 11:19:01 | 23.609 |

|                    |        |                    |        |
|--------------------|--------|--------------------|--------|
| 9/22/2011 15:46:01 | 37.407 | 9/17/2011 11:59:01 | 23.609 |
| 9/22/2011 16:16:01 | 36.411 | 9/17/2011 12:39:01 | 23.609 |
| 9/22/2011 16:46:01 | 35.476 | 9/17/2011 13:19:01 | 23.609 |
| 9/22/2011 17:16:01 | 34.167 | 9/17/2011 13:59:01 | 23.672 |
| 9/22/2011 17:46:01 | 32.422 | 9/17/2011 14:39:01 | 23.672 |
| 9/22/2011 18:16:01 | 30.613 | 9/17/2011 15:19:01 | 23.734 |
| 9/22/2011 18:46:01 | 30.363 | 9/17/2011 15:59:01 | 23.734 |
| 9/22/2011 19:16:01 | 29.115 | 9/17/2011 16:39:01 | 23.797 |
| 9/22/2011 19:46:01 | 28.615 | 9/17/2011 17:19:01 | 23.797 |
| 9/22/2011 20:16:01 | 28.303 | 9/17/2011 17:59:01 | 23.859 |
| 9/22/2011 20:46:01 | 27.179 | 9/17/2011 18:39:01 | 23.922 |
| 9/22/2011 21:16:01 | 24.679 | 9/17/2011 19:19:01 | 23.922 |
| 9/22/2011 21:46:01 | 24.117 | 9/17/2011 19:59:01 | 23.984 |
| 9/22/2011 22:16:01 | 23.617 | 9/17/2011 20:39:01 | 23.984 |
| 9/22/2011 22:46:01 | 23.179 | 9/17/2011 21:19:01 | 24.047 |
| 9/22/2011 23:16:01 | 23.116 | 9/17/2011 21:59:01 | 24.047 |
| 9/22/2011 23:46:01 | 23.304 | 9/17/2011 22:39:01 | 24.109 |
| 9/23/2011 00:16:01 | 23.179 | 9/17/2011 23:19:01 | 24.109 |
| 9/23/2011 00:46:01 | 23.116 | 9/17/2011 23:59:01 | 24.109 |
| 9/23/2011 01:16:01 | 22.866 | 9/18/2011 00:39:01 | 24.109 |
| 9/23/2011 01:46:01 | 22.616 | 9/18/2011 01:19:01 | 24.109 |
| 9/23/2011 02:16:01 | 22.366 | 9/18/2011 01:59:01 | 24.109 |
| 9/23/2011 02:46:01 | 22.115 | 9/18/2011 02:39:01 | 24.109 |
| 9/23/2011 03:16:01 | 21.990 | 9/18/2011 03:19:01 | 24.109 |
| 9/23/2011 03:46:01 | 21.740 | 9/18/2011 03:59:01 | 24.109 |
| 9/23/2011 04:16:01 | 21.365 | 9/18/2011 04:39:01 | 24.109 |
| 9/23/2011 04:46:01 | 21.052 | 9/18/2011 05:19:01 | 24.109 |
| 9/23/2011 05:16:01 | 20.864 | 9/18/2011 05:59:01 | 24.109 |
| 9/23/2011 05:46:01 | 20.989 | 9/18/2011 06:39:01 | 24.047 |
| 9/23/2011 06:16:01 | 21.114 | 9/18/2011 07:19:01 | 24.047 |
| 9/23/2011 06:46:01 | 21.427 | 9/18/2011 07:59:01 | 24.047 |
| 9/23/2011 07:16:01 | 21.552 | 9/18/2011 08:39:01 | 24.047 |
| 9/23/2011 07:46:01 | 21.865 | 9/18/2011 09:19:01 | 23.984 |
| 9/23/2011 08:16:01 | 22.616 | 9/18/2011 09:59:01 | 23.984 |
| 9/23/2011 08:46:01 | 25.929 | 9/18/2011 10:39:01 | 23.984 |
| 9/23/2011 09:16:01 | 28.428 | 9/18/2011 11:19:01 | 23.922 |
| 9/23/2011 09:46:01 | 29.926 | 9/18/2011 11:59:01 | 23.922 |
| 9/23/2011 10:16:01 | 31.112 | 9/18/2011 12:39:01 | 23.922 |
| 9/23/2011 10:46:01 | 31.673 | 9/18/2011 13:19:01 | 23.922 |
| 9/23/2011 11:16:01 | 33.793 | 9/18/2011 13:59:01 | 23.922 |
| 9/23/2011 11:46:01 | 34.604 | 9/18/2011 14:39:01 | 23.984 |
| 9/23/2011 12:16:01 | 35.102 | 9/18/2011 15:19:01 | 23.984 |
| 9/23/2011 12:46:01 | 35.725 | 9/18/2011 15:59:01 | 24.047 |
| 9/23/2011 13:16:01 | 36.037 | 9/18/2011 16:39:01 | 24.047 |
| 9/23/2011 13:46:01 | 36.473 | 9/18/2011 17:19:01 | 24.047 |
| 9/23/2011 14:16:01 | 36.971 | 9/18/2011 17:59:01 | 24.109 |
| 9/23/2011 14:46:01 | 36.660 | 9/18/2011 18:39:01 | 24.109 |
| 9/23/2011 15:16:01 | 36.348 | 9/18/2011 19:19:01 | 24.172 |
| 9/23/2011 15:46:01 | 35.476 | 9/18/2011 19:59:01 | 24.172 |
| 9/23/2011 16:16:01 | 34.604 | 9/18/2011 20:39:01 | 24.172 |

|                    |        |                    |        |
|--------------------|--------|--------------------|--------|
| 9/23/2011 16:46:01 | 33.606 | 9/18/2011 21:19:01 | 24.234 |
| 9/23/2011 17:16:01 | 32.047 | 9/18/2011 21:59:01 | 24.234 |
| 9/23/2011 17:46:01 | 30.113 | 9/18/2011 22:39:01 | 24.234 |
| 9/23/2011 18:16:01 | 28.366 | 9/18/2011 23:19:01 | 24.234 |
| 9/23/2011 18:46:01 | 27.179 | 9/18/2011 23:59:01 | 24.234 |
| 9/23/2011 19:16:01 | 26.929 | 9/19/2011 00:39:01 | 24.234 |
| 9/23/2011 19:46:01 | 26.867 | 9/19/2011 01:19:01 | 24.234 |
| 9/23/2011 20:16:01 | 26.679 | 9/19/2011 01:59:01 | 24.172 |
| 9/23/2011 20:46:01 | 26.304 | 9/19/2011 02:39:01 | 24.172 |
| 9/23/2011 21:16:01 | 25.929 | 9/19/2011 03:19:01 | 24.172 |
| 9/23/2011 21:46:01 | 25.367 | 9/19/2011 03:59:01 | 24.109 |
| 9/23/2011 22:16:01 | 24.679 | 9/19/2011 04:39:01 | 24.109 |
| 9/23/2011 22:46:01 | 23.742 | 9/19/2011 05:19:01 | 24.109 |
| 9/23/2011 23:16:01 | 23.179 | 9/19/2011 05:59:01 | 24.047 |
| 9/23/2011 23:46:01 | 23.116 | 9/19/2011 06:39:01 | 23.984 |
| 9/24/2011 00:16:01 | 23.116 | 9/19/2011 07:19:01 | 23.984 |
| 9/24/2011 00:46:01 | 22.929 | 9/19/2011 07:59:01 | 23.922 |
| 9/24/2011 01:16:01 | 22.303 | 9/19/2011 08:39:01 | 23.922 |
| 9/24/2011 01:46:01 | 21.928 | 9/19/2011 09:19:01 | 23.859 |
| 9/24/2011 02:16:01 | 21.803 | 9/19/2011 09:59:01 | 23.797 |
| 9/24/2011 02:46:01 | 21.490 | 9/19/2011 10:39:01 | 23.797 |
| 9/24/2011 03:16:01 | 21.365 | 9/19/2011 11:19:01 | 23.734 |
| 9/24/2011 03:46:01 | 21.239 | 9/19/2011 11:59:01 | 23.734 |
| 9/24/2011 04:16:01 | 21.302 | 9/19/2011 12:39:01 | 23.734 |
| 9/24/2011 04:46:01 | 21.177 | 9/19/2011 13:19:01 | 23.734 |
| 9/24/2011 05:16:01 | 20.551 | 9/19/2011 13:59:01 | 23.734 |
| 9/24/2011 05:46:01 | 20.050 | 9/19/2011 14:39:01 | 23.797 |
| 9/24/2011 06:16:01 | 19.800 | 9/19/2011 15:19:01 | 23.797 |
| 9/24/2011 06:46:01 | 21.114 | 9/19/2011 15:59:01 | 23.859 |
| 9/24/2011 07:16:01 | 21.677 | 9/19/2011 16:39:01 | 23.859 |
| 9/24/2011 07:46:01 | 23.679 | 9/19/2011 17:19:01 | 23.859 |
| 9/24/2011 08:16:01 | 26.929 | 9/19/2011 17:59:01 | 23.922 |
| 9/24/2011 08:46:01 | 28.803 | 9/19/2011 18:39:01 | 23.922 |
| 9/24/2011 09:16:01 | 29.115 | 9/19/2011 19:19:01 | 23.984 |
| 9/24/2011 09:46:01 | 31.424 | 9/19/2011 19:59:01 | 23.984 |
| 9/24/2011 10:16:01 | 32.733 | 9/19/2011 20:39:01 | 24.047 |
| 9/24/2011 10:46:01 | 34.354 | 9/19/2011 21:19:01 | 24.047 |
| 9/24/2011 11:16:01 | 35.165 | 9/19/2011 21:59:01 | 24.047 |
| 9/24/2011 11:46:01 | 35.663 | 9/19/2011 22:39:01 | 24.047 |
| 9/24/2011 12:16:01 | 35.663 | 9/19/2011 23:19:01 | 24.047 |
| 9/24/2011 12:46:01 | 36.535 | 9/19/2011 23:59:01 | 24.109 |
| 9/24/2011 13:16:01 | 36.846 | 9/20/2011 00:39:01 | 24.109 |
| 9/24/2011 13:46:01 | 37.345 | 9/20/2011 01:19:01 | 24.109 |
| 9/24/2011 14:16:01 | 37.967 | 9/20/2011 01:59:01 | 24.047 |
| 9/24/2011 14:46:01 | 37.158 | 9/20/2011 02:39:01 | 24.047 |
| 9/24/2011 15:16:01 | 36.660 | 9/20/2011 03:19:01 | 24.047 |
| 9/24/2011 15:46:01 | 35.351 | 9/20/2011 03:59:01 | 24.047 |
| 9/24/2011 16:16:01 | 34.541 | 9/20/2011 04:39:01 | 24.047 |
| 9/24/2011 16:46:01 | 33.482 | 9/20/2011 05:19:01 | 23.984 |
| 9/24/2011 17:16:01 | 32.297 | 9/20/2011 05:59:01 | 23.984 |



|                    |        |                    |        |
|--------------------|--------|--------------------|--------|
| 9/24/2011 17:46:01 | 30.363 | 9/20/2011 06:39:01 | 23.922 |
| 9/24/2011 18:16:01 | 29.240 | 9/20/2011 07:19:01 | 23.922 |
| 9/24/2011 18:46:01 | 28.303 | 9/20/2011 07:59:01 | 23.859 |
| 9/24/2011 19:16:01 | 27.054 | 9/20/2011 08:39:01 | 23.859 |
| 9/24/2011 19:46:01 | 26.429 | 9/20/2011 09:19:01 | 23.797 |
| 9/24/2011 20:16:01 | 25.742 | 9/20/2011 09:59:01 | 23.797 |
| 9/24/2011 20:46:01 | 25.429 | 9/20/2011 10:39:01 | 23.734 |
| 9/24/2011 21:16:01 | 25.242 | 9/20/2011 11:19:01 | 23.734 |
| 9/24/2011 21:46:01 | 25.117 | 9/20/2011 11:59:01 | 23.734 |
| 9/24/2011 22:16:01 | 25.054 | 9/20/2011 12:39:01 | 23.734 |
| 9/24/2011 22:46:01 | 24.929 | 9/20/2011 13:19:01 | 23.734 |
| 9/24/2011 23:16:01 | 24.554 | 9/20/2011 13:59:01 | 23.734 |
| 9/24/2011 23:46:01 | 24.242 | 9/20/2011 14:39:01 | 23.797 |
| 9/25/2011 00:16:01 | 23.491 | 9/20/2011 15:19:01 | 23.859 |
| 9/25/2011 00:46:01 | 22.991 | 9/20/2011 15:59:01 | 23.859 |
| 9/25/2011 01:16:01 | 23.116 | 9/20/2011 16:39:01 | 23.922 |
| 9/25/2011 01:46:01 | 23.304 | 9/20/2011 17:19:01 | 23.984 |
| 9/25/2011 02:16:01 | 23.491 | 9/20/2011 17:59:01 | 23.984 |
| 9/25/2011 02:46:01 | 24.367 | 9/20/2011 18:39:01 | 24.047 |
| 9/25/2011 03:16:01 | 24.242 | 9/20/2011 19:19:01 | 24.047 |
| 9/25/2011 03:46:01 | 23.992 | 9/20/2011 19:59:01 | 24.109 |
| 9/25/2011 04:16:01 | 23.804 | 9/20/2011 20:39:01 | 24.172 |
| 9/25/2011 04:46:01 | 23.679 | 9/20/2011 21:19:01 | 24.172 |
| 9/25/2011 05:16:01 | 23.304 | 9/20/2011 21:59:01 | 24.172 |
| 9/25/2011 05:46:01 | 23.179 | 9/20/2011 22:39:01 | 24.234 |
| 9/25/2011 06:16:01 | 23.304 | 9/20/2011 23:19:01 | 24.234 |
| 9/25/2011 06:46:01 | 23.366 | 9/20/2011 23:59:01 | 24.234 |
| 9/25/2011 07:16:01 | 23.429 | 9/21/2011 00:39:01 | 24.234 |
| 9/25/2011 07:46:01 | 23.491 | 9/21/2011 01:19:01 | 24.234 |
| 9/25/2011 08:16:01 | 23.804 | 9/21/2011 01:59:01 | 24.234 |
| 9/25/2011 08:46:01 | 24.617 | 9/21/2011 02:39:01 | 24.234 |
| 9/25/2011 09:16:01 | 25.054 | 9/21/2011 03:19:01 | 24.234 |
| 9/25/2011 09:46:01 | 25.929 | 9/21/2011 03:59:01 | 24.234 |
| 9/25/2011 10:16:01 | 26.554 | 9/21/2011 04:39:01 | 24.172 |
| 9/25/2011 10:46:01 | 27.616 | 9/21/2011 05:19:01 | 24.172 |
| 9/25/2011 11:16:01 | 28.366 | 9/21/2011 05:59:01 | 24.172 |
| 9/25/2011 11:46:01 | 29.552 | 9/21/2011 06:39:01 | 24.172 |
| 9/25/2011 12:16:01 | 32.422 | 9/21/2011 07:19:01 | 24.109 |
| 9/25/2011 12:46:01 | 32.921 | 9/21/2011 07:59:01 | 24.109 |
| 9/25/2011 13:16:01 | 34.105 | 9/21/2011 08:39:01 | 24.047 |
| 9/25/2011 13:46:01 | 35.601 | 9/21/2011 09:19:01 | 24.047 |
| 9/25/2011 14:16:01 | 36.411 | 9/21/2011 09:59:01 | 23.984 |
| 9/25/2011 14:46:01 | 35.476 | 9/21/2011 10:39:01 | 23.984 |
| 9/25/2011 15:16:01 | 34.978 | 9/21/2011 11:19:01 | 23.984 |
| 9/25/2011 15:46:01 | 34.853 | 9/21/2011 11:59:01 | 23.922 |
| 9/25/2011 16:16:01 | 33.045 | 9/21/2011 12:39:01 | 23.984 |
| 9/25/2011 16:46:01 | 32.047 | 9/21/2011 13:19:01 | 23.984 |
| 9/25/2011 17:16:01 | 31.548 | 9/21/2011 13:59:01 | 23.984 |
| 9/25/2011 17:46:01 | 30.113 | 9/21/2011 14:39:01 | 24.047 |
| 9/25/2011 18:16:01 | 28.615 | 9/21/2011 15:19:01 | 24.109 |

|                    |        |                    |        |
|--------------------|--------|--------------------|--------|
| 9/25/2011 18:46:01 | 27.429 | 9/21/2011 15:59:01 | 24.172 |
| 9/25/2011 19:16:01 | 26.867 | 9/21/2011 16:39:01 | 24.234 |
| 9/25/2011 19:46:01 | 26.804 | 9/21/2011 17:19:01 | 24.234 |
| 9/25/2011 20:16:01 | 27.116 | 9/21/2011 17:59:01 | 24.297 |
| 9/25/2011 20:46:01 | 27.491 | 9/21/2011 18:39:01 | 24.359 |
| 9/25/2011 21:16:01 | 27.679 | 9/21/2011 19:19:01 | 24.359 |
| 9/25/2011 21:46:01 | 26.742 | 9/21/2011 19:59:01 | 24.422 |
| 9/25/2011 22:16:01 | 25.742 | 9/21/2011 20:39:01 | 24.484 |
| 9/25/2011 22:46:01 | 25.242 | 9/21/2011 21:19:01 | 24.484 |
| 9/25/2011 23:16:01 | 25.117 | 9/21/2011 21:59:01 | 24.547 |
| 9/25/2011 23:46:01 | 24.742 | 9/21/2011 22:39:01 | 24.547 |
| 9/26/2011 00:16:01 | 24.742 | 9/21/2011 23:19:01 | 24.547 |
| 9/26/2011 00:46:01 | 24.304 | 9/21/2011 23:59:01 | 24.547 |
| 9/26/2011 01:16:01 | 23.679 | 9/22/2011 00:39:01 | 24.609 |
| 9/26/2011 01:46:01 | 23.116 | 9/22/2011 01:19:01 | 24.609 |
| 9/26/2011 02:16:01 | 22.115 | 9/22/2011 01:59:01 | 24.609 |
| 9/26/2011 02:46:01 | 21.552 | 9/22/2011 02:39:01 | 24.609 |
| 9/26/2011 03:16:01 | 21.365 | 9/22/2011 03:19:01 | 24.609 |
| 9/26/2011 03:46:01 | 20.989 | 9/22/2011 03:59:01 | 24.547 |
| 9/26/2011 04:16:01 | 20.301 | 9/22/2011 04:39:01 | 24.547 |
| 9/26/2011 04:46:01 | 20.113 | 9/22/2011 05:19:01 | 24.547 |
| 9/26/2011 05:16:01 | 19.800 | 9/22/2011 05:59:01 | 24.547 |
| 9/26/2011 05:46:01 | 19.988 | 9/22/2011 06:39:01 | 24.484 |
| 9/26/2011 06:16:01 | 20.989 | 9/22/2011 07:19:01 | 24.484 |
| 9/26/2011 06:46:01 | 22.491 | 9/22/2011 07:59:01 | 24.484 |
| 9/26/2011 07:16:01 | 24.367 | 9/22/2011 08:39:01 | 24.484 |
| 9/26/2011 07:46:01 | 26.617 | 9/22/2011 09:19:01 | 24.422 |
| 9/26/2011 08:16:01 | 27.803 | 9/22/2011 09:59:01 | 24.422 |
| 9/26/2011 08:46:01 | 28.615 | 9/22/2011 10:39:01 | 24.359 |
| 9/26/2011 09:16:01 | 29.926 | 9/22/2011 11:19:01 | 24.359 |
| 9/26/2011 09:46:01 | 31.361 | 9/22/2011 11:59:01 | 24.359 |
| 9/26/2011 10:16:01 | 32.297 | 9/22/2011 12:39:01 | 24.359 |
| 9/26/2011 10:46:01 | 32.921 | 9/22/2011 13:19:01 | 24.359 |
| 9/26/2011 11:16:01 | 33.606 | 9/22/2011 13:59:01 | 24.422 |
| 9/26/2011 11:46:01 | 34.354 | 9/22/2011 14:39:01 | 24.422 |
| 9/26/2011 12:16:01 | 33.357 | 9/22/2011 15:19:01 | 24.484 |
| 9/26/2011 12:46:01 | 33.731 | 9/22/2011 15:59:01 | 24.547 |
| 9/26/2011 13:16:01 | 33.419 | 9/22/2011 16:39:01 | 24.609 |
| 9/26/2011 13:46:01 | 32.796 | 9/22/2011 17:19:01 | 24.609 |
| 9/26/2011 14:16:01 | 33.606 | 9/22/2011 17:59:01 | 24.672 |
| 9/26/2011 14:46:01 | 33.980 | 9/22/2011 18:39:01 | 24.734 |
| 9/26/2011 15:16:01 | 33.731 | 9/22/2011 19:19:01 | 24.734 |
| 9/26/2011 15:46:01 | 32.359 | 9/22/2011 19:59:01 | 24.797 |
| 9/26/2011 16:16:01 | 31.548 | 9/22/2011 20:39:01 | 24.797 |
| 9/26/2011 16:46:01 | 30.550 | 9/22/2011 21:19:01 | 24.859 |
| 9/26/2011 17:16:01 | 29.801 | 9/22/2011 21:59:01 | 24.859 |
| 9/26/2011 17:46:01 | 28.990 | 9/22/2011 22:39:01 | 24.922 |
| 9/26/2011 18:16:01 | 28.053 | 9/22/2011 23:19:01 | 24.922 |
| 9/26/2011 18:46:01 | 27.429 | 9/22/2011 23:59:01 | 24.922 |
| 9/26/2011 19:16:01 | 26.742 | 9/23/2011 00:39:01 | 24.922 |

|                    |        |                    |        |
|--------------------|--------|--------------------|--------|
| 9/26/2011 19:46:01 | 26.367 | 9/23/2011 01:19:01 | 24.922 |
| 9/26/2011 20:16:01 | 25.992 | 9/23/2011 01:59:01 | 24.922 |
| 9/26/2011 20:46:01 | 25.992 | 9/23/2011 02:39:01 | 24.922 |
| 9/26/2011 21:16:01 | 25.617 | 9/23/2011 03:19:01 | 24.922 |
| 9/26/2011 21:46:01 | 25.117 | 9/23/2011 03:59:01 | 24.922 |
| 9/26/2011 22:16:01 | 24.429 | 9/23/2011 04:39:01 | 24.922 |
| 9/26/2011 22:46:01 | 23.867 | 9/23/2011 05:19:01 | 24.922 |
| 9/26/2011 23:16:01 | 23.241 | 9/23/2011 05:59:01 | 24.859 |
| 9/26/2011 23:46:01 | 22.553 | 9/23/2011 06:39:01 | 24.859 |
| 9/27/2011 00:16:01 | 22.115 | 9/23/2011 07:19:01 | 24.859 |
| 9/27/2011 00:46:01 | 21.552 | 9/23/2011 07:59:01 | 24.859 |
| 9/27/2011 01:16:01 | 20.989 | 9/23/2011 08:39:01 | 24.797 |
| 9/27/2011 01:46:01 | 20.488 | 9/23/2011 09:18:01 | 24.426 |
| 9/27/2011 02:16:01 | 19.863 | 9/23/2011 09:48:01 | 24.363 |
| 9/27/2011 02:46:01 | 19.549 | 9/23/2011 10:18:01 | 24.363 |
| 9/27/2011 03:16:01 | 19.299 | 9/23/2011 10:48:01 | 24.363 |
| 9/27/2011 03:46:01 | 19.174 | 9/23/2011 11:18:01 | 24.363 |
| 9/27/2011 04:16:01 | 19.111 | 9/23/2011 11:48:01 | 24.363 |
| 9/27/2011 04:46:01 | 19.049 | 9/23/2011 12:18:01 | 24.363 |
| 9/27/2011 05:16:01 | 19.299 | 9/23/2011 12:48:01 | 24.363 |
| 9/27/2011 05:46:01 | 19.049 | 9/23/2011 13:18:01 | 24.363 |
| 9/27/2011 06:16:01 | 19.111 | 9/23/2011 13:48:01 | 24.363 |
| 9/27/2011 06:46:01 | 20.426 | 9/23/2011 14:18:01 | 24.363 |
| 9/27/2011 07:16:01 | 22.553 | 9/23/2011 14:48:01 | 24.426 |
| 9/27/2011 07:46:01 | 25.054 | 9/23/2011 15:18:01 | 24.426 |
| 9/27/2011 08:16:01 | 26.804 | 9/23/2011 15:48:01 | 24.426 |
| 9/27/2011 08:46:01 | 28.178 | 9/23/2011 16:18:01 | 24.426 |
| 9/27/2011 09:16:01 | 29.427 | 9/23/2011 16:48:01 | 24.488 |
| 9/27/2011 09:46:01 | 30.987 | 9/23/2011 17:18:01 | 24.488 |
| 9/27/2011 10:16:01 | 31.611 | 9/23/2011 17:48:01 | 24.488 |
| 9/27/2011 10:46:01 | 32.733 | 9/23/2011 18:18:01 | 24.488 |
| 9/27/2011 11:16:01 | 34.479 | 9/23/2011 18:48:01 | 24.551 |
| 9/27/2011 11:46:01 | 34.978 | 9/23/2011 19:18:01 | 24.551 |
| 9/27/2011 12:16:01 | 35.289 | 9/23/2011 19:48:01 | 24.551 |
| 9/27/2011 12:46:01 | 35.663 | 9/23/2011 20:18:01 | 24.551 |
| 9/27/2011 13:16:01 | 35.974 | 9/23/2011 20:48:01 | 24.551 |
| 9/27/2011 13:46:01 | 36.473 | 9/23/2011 21:18:01 | 24.551 |
| 9/27/2011 14:16:01 | 36.722 | 9/23/2011 21:48:01 | 24.551 |
| 9/27/2011 14:46:01 | 36.099 | 9/23/2011 22:18:01 | 24.551 |
| 9/27/2011 15:16:01 | 36.348 | 9/23/2011 22:48:01 | 24.551 |
| 9/27/2011 15:46:01 | 34.915 | 9/23/2011 23:18:01 | 24.551 |
| 9/27/2011 16:16:01 | 33.918 | 9/23/2011 23:48:01 | 24.551 |
| 9/27/2011 16:46:01 | 32.983 | 9/24/2011 00:18:01 | 24.551 |
| 9/27/2011 17:16:01 | 31.611 | 9/24/2011 00:48:01 | 24.488 |
| 9/27/2011 17:46:01 | 29.739 | 9/24/2011 01:18:01 | 24.488 |
| 9/27/2011 18:16:01 | 28.553 | 9/24/2011 01:48:01 | 24.488 |
| 9/27/2011 18:46:01 | 27.616 | 9/24/2011 02:18:01 | 24.488 |
| 9/27/2011 19:16:01 | 27.554 | 9/24/2011 02:48:01 | 24.488 |
| 9/27/2011 19:46:01 | 27.866 | 9/24/2011 03:18:01 | 24.426 |
| 9/27/2011 20:16:01 | 27.241 | 9/24/2011 03:48:01 | 24.426 |

|                    |        |                    |        |
|--------------------|--------|--------------------|--------|
| 9/27/2011 20:46:01 | 26.679 | 9/24/2011 04:18:01 | 24.426 |
| 9/27/2011 21:16:01 | 25.804 | 9/24/2011 04:48:01 | 24.426 |
| 9/27/2011 21:46:01 | 24.992 | 9/24/2011 05:18:01 | 24.363 |
| 9/27/2011 22:16:01 | 24.492 | 9/24/2011 05:48:01 | 24.363 |
| 9/27/2011 22:46:01 | 23.617 | 9/24/2011 06:18:01 | 24.363 |
| 9/27/2011 23:16:01 | 22.616 | 9/24/2011 06:48:01 | 24.301 |
| 9/27/2011 23:46:01 | 21.928 | 9/24/2011 07:18:01 | 24.301 |
| 9/28/2011 00:16:01 | 21.552 | 9/24/2011 07:48:01 | 24.238 |
| 9/28/2011 00:46:01 | 21.052 | 9/24/2011 08:18:01 | 24.238 |
| 9/28/2011 01:16:01 | 20.989 | 9/24/2011 08:48:01 | 24.238 |
| 9/28/2011 01:46:01 | 21.052 | 9/24/2011 09:18:01 | 24.176 |
| 9/28/2011 02:16:01 | 21.114 | 9/24/2011 09:48:01 | 24.176 |
| 9/28/2011 02:46:01 | 20.927 | 9/24/2011 10:18:01 | 24.176 |
| 9/28/2011 03:16:01 | 20.614 | 9/24/2011 10:48:01 | 24.176 |
| 9/28/2011 03:46:01 | 20.676 | 9/24/2011 11:18:01 | 24.176 |
| 9/28/2011 04:16:01 | 20.739 | 9/24/2011 11:48:01 | 24.176 |
| 9/28/2011 04:46:01 | 20.238 | 9/24/2011 12:18:01 | 24.176 |
| 9/28/2011 05:16:01 | 19.800 | 9/24/2011 12:48:01 | 24.176 |
| 9/28/2011 05:46:01 | 19.111 | 9/24/2011 13:18:01 | 24.176 |
| 9/28/2011 06:16:01 | 19.424 | 9/24/2011 13:48:01 | 24.176 |
| 9/28/2011 06:46:01 | 21.302 | 9/24/2011 14:18:01 | 24.238 |
| 9/28/2011 07:16:01 | 23.742 | 9/24/2011 14:48:01 | 24.238 |
| 9/28/2011 07:46:01 | 26.304 | 9/24/2011 15:18:01 | 24.238 |
| 9/28/2011 08:16:01 | 27.741 | 9/24/2011 15:48:01 | 24.301 |
| 9/28/2011 08:46:01 | 28.990 | 9/24/2011 16:18:01 | 24.301 |
| 9/28/2011 09:16:01 | 29.801 | 9/24/2011 16:48:01 | 24.363 |
| 9/28/2011 09:46:01 | 31.237 | 9/24/2011 17:18:01 | 24.363 |
| 9/28/2011 10:16:01 | 31.736 | 9/24/2011 17:48:01 | 24.363 |
| 9/28/2011 10:46:01 | 33.295 | 9/24/2011 18:18:01 | 24.426 |
| 9/28/2011 11:16:01 | 34.978 | 9/24/2011 18:48:01 | 24.426 |
| 9/28/2011 11:46:01 | 35.351 | 9/24/2011 19:18:01 | 24.426 |
| 9/28/2011 12:16:01 | 35.227 | 9/24/2011 19:48:01 | 24.426 |
| 9/28/2011 12:46:01 | 35.725 | 9/24/2011 20:18:01 | 24.488 |
| 9/28/2011 13:16:01 | 36.473 | 9/24/2011 20:48:01 | 24.488 |
| 9/28/2011 13:46:01 | 36.909 | 9/24/2011 21:18:01 | 24.488 |
| 9/28/2011 14:16:01 | 37.531 | 9/24/2011 21:48:01 | 24.488 |
| 9/28/2011 14:46:01 | 37.096 | 9/24/2011 22:18:01 | 24.488 |
| 9/28/2011 15:16:01 | 37.282 | 9/24/2011 22:48:01 | 24.488 |
| 9/28/2011 15:46:01 | 35.227 | 9/24/2011 23:18:01 | 24.488 |
| 9/28/2011 16:16:01 | 34.791 | 9/24/2011 23:48:01 | 24.488 |
| 9/28/2011 16:46:01 | 32.983 | 9/25/2011 00:18:01 | 24.426 |
| 9/28/2011 17:16:01 | 31.486 | 9/25/2011 00:48:01 | 24.426 |
| 9/28/2011 17:46:01 | 29.989 | 9/25/2011 01:18:01 | 24.426 |
| 9/28/2011 18:16:01 | 28.740 | 9/25/2011 01:48:01 | 24.426 |
| 9/28/2011 18:46:01 | 27.679 | 9/25/2011 02:18:01 | 24.426 |
| 9/28/2011 19:16:01 | 27.304 | 9/25/2011 02:48:01 | 24.426 |
| 9/28/2011 19:46:01 | 27.179 | 9/25/2011 03:18:01 | 24.363 |
| 9/28/2011 20:16:01 | 26.679 | 9/25/2011 03:48:01 | 24.363 |
| 9/28/2011 20:46:01 | 26.304 | 9/25/2011 04:18:01 | 24.363 |
| 9/28/2011 21:16:01 | 25.429 | 9/25/2011 04:48:01 | 24.363 |

|                    |        |                    |        |
|--------------------|--------|--------------------|--------|
| 9/28/2011 21:46:01 | 25.054 | 9/25/2011 05:18:01 | 24.363 |
| 9/28/2011 22:16:01 | 24.617 | 9/25/2011 05:48:01 | 24.301 |
| 9/28/2011 22:46:01 | 23.929 | 9/25/2011 06:18:01 | 24.301 |
| 9/28/2011 23:16:01 | 22.866 | 9/25/2011 06:48:01 | 24.301 |
| 9/28/2011 23:46:01 | 22.115 | 9/25/2011 07:18:01 | 24.301 |
| 9/29/2011 00:16:01 | 21.615 | 9/25/2011 07:48:01 | 24.238 |
| 9/29/2011 00:46:01 | 21.177 | 9/25/2011 08:18:01 | 24.238 |
| 9/29/2011 01:16:01 | 20.739 | 9/25/2011 08:48:01 | 24.238 |
| 9/29/2011 01:46:01 | 20.363 | 9/25/2011 09:18:01 | 24.238 |
| 9/29/2011 02:16:01 | 20.050 | 9/25/2011 09:48:01 | 24.238 |
| 9/29/2011 02:46:01 | 19.863 | 9/25/2011 10:18:01 | 24.176 |
| 9/29/2011 03:16:01 | 19.424 | 9/25/2011 10:48:01 | 24.176 |
| 9/29/2011 03:46:01 | 18.923 | 9/25/2011 11:18:01 | 24.176 |
| 9/29/2011 04:16:01 | 18.610 | 9/25/2011 11:48:01 | 24.176 |
| 9/29/2011 04:46:01 | 18.297 | 9/25/2011 12:18:01 | 24.176 |
| 9/29/2011 05:16:01 | 18.360 | 9/25/2011 12:48:01 | 24.176 |
| 9/29/2011 05:46:01 | 18.673 | 9/25/2011 13:18:01 | 24.176 |
| 9/29/2011 06:16:01 | 18.986 | 9/25/2011 13:48:01 | 24.176 |
| 9/29/2011 06:46:01 | 20.739 | 9/25/2011 14:18:01 | 24.176 |
| 9/29/2011 07:16:01 | 23.617 | 9/25/2011 14:48:01 | 24.176 |
| 9/29/2011 07:46:01 | 25.929 | 9/25/2011 15:18:01 | 24.238 |
| 9/29/2011 08:16:01 | 27.803 | 9/25/2011 15:48:01 | 24.238 |
| 9/29/2011 08:46:01 | 29.240 | 9/25/2011 16:18:01 | 24.301 |
| 9/29/2011 09:16:01 | 30.363 | 9/25/2011 16:48:01 | 24.301 |
| 9/29/2011 09:46:01 | 31.985 | 9/25/2011 17:18:01 | 24.301 |
| 9/29/2011 10:16:01 | 32.921 | 9/25/2011 17:48:01 | 24.363 |
| 9/29/2011 10:46:01 | 33.669 | 9/25/2011 18:18:01 | 24.363 |
| 9/29/2011 11:16:01 | 34.915 | 9/25/2011 18:48:01 | 24.363 |
| 9/29/2011 11:46:01 | 35.414 | 9/25/2011 19:18:01 | 24.426 |
| 9/29/2011 12:16:01 | 35.850 | 9/25/2011 19:48:01 | 24.426 |
| 9/29/2011 12:46:01 | 36.224 | 9/25/2011 20:18:01 | 24.426 |
| 9/29/2011 13:16:01 | 36.846 | 9/25/2011 20:48:01 | 24.426 |
| 9/29/2011 13:46:01 | 37.594 | 9/25/2011 21:18:01 | 24.426 |
| 9/29/2011 14:16:01 | 37.220 | 9/25/2011 21:48:01 | 24.426 |
| 9/29/2011 14:46:01 | 36.909 | 9/25/2011 22:18:01 | 24.426 |
| 9/29/2011 15:16:01 | 37.594 | 9/25/2011 22:48:01 | 24.426 |
| 9/29/2011 15:46:01 | 36.099 | 9/25/2011 23:18:01 | 24.426 |
| 9/29/2011 16:16:01 | 35.102 | 9/25/2011 23:48:01 | 24.426 |
| 9/29/2011 16:46:01 | 33.918 | 9/26/2011 00:18:01 | 24.426 |
| 9/29/2011 17:16:01 | 32.359 | 9/26/2011 00:48:01 | 24.426 |
| 9/29/2011 17:46:01 | 30.051 | 9/26/2011 01:18:01 | 24.426 |
| 9/29/2011 18:16:01 | 28.053 | 9/26/2011 01:48:01 | 24.426 |
| 9/29/2011 18:46:01 | 26.617 | 9/26/2011 02:18:01 | 24.363 |
| 9/29/2011 19:16:01 | 26.742 | 9/26/2011 02:48:01 | 24.363 |
| 9/29/2011 19:46:01 | 26.179 | 9/26/2011 03:18:01 | 24.363 |
| 9/29/2011 20:16:01 | 25.492 | 9/26/2011 03:48:01 | 24.363 |
| 9/29/2011 20:46:01 | 24.992 | 9/26/2011 04:18:01 | 24.301 |
| 9/29/2011 21:16:01 | 24.492 | 9/26/2011 04:48:01 | 24.301 |
| 9/29/2011 21:46:01 | 24.179 | 9/26/2011 05:18:01 | 24.301 |
| 9/29/2011 22:16:01 | 23.366 | 9/26/2011 05:48:01 | 24.238 |

|                    |        |                    |        |
|--------------------|--------|--------------------|--------|
| 9/29/2011 22:46:01 | 22.929 | 9/26/2011 06:18:01 | 24.238 |
| 9/29/2011 23:16:01 | 22.366 | 9/26/2011 06:48:01 | 24.238 |
| 9/29/2011 23:46:01 | 22.053 | 9/26/2011 07:18:01 | 24.176 |
| 9/30/2011 00:16:01 | 21.803 | 9/26/2011 07:48:01 | 24.176 |
| 9/30/2011 00:46:01 | 21.239 | 9/26/2011 08:18:01 | 24.113 |
| 9/30/2011 01:16:01 | 20.551 | 9/26/2011 08:48:01 | 24.113 |
| 9/30/2011 01:46:01 | 19.925 | 9/26/2011 09:18:01 | 24.113 |
| 9/30/2011 02:16:01 | 19.612 | 9/26/2011 09:48:01 | 24.051 |
| 9/30/2011 02:46:01 | 18.798 | 9/26/2011 10:18:01 | 24.051 |
| 9/30/2011 03:16:01 | 18.234 | 9/26/2011 10:48:01 | 24.051 |
| 9/30/2011 03:46:01 | 17.796 | 9/26/2011 11:18:01 | 24.051 |
| 9/30/2011 04:16:01 | 18.172 | 9/26/2011 11:48:01 | 24.051 |
| 9/30/2011 04:46:01 | 18.798 | 9/26/2011 12:18:01 | 24.113 |
| 9/30/2011 05:16:01 | 18.798 | 9/26/2011 12:48:01 | 24.113 |
| 9/30/2011 05:46:01 | 18.735 | 9/26/2011 13:18:01 | 24.113 |
| 9/30/2011 06:16:01 | 19.737 | 9/26/2011 13:48:01 | 24.176 |
| 9/30/2011 06:46:01 | 20.739 | 9/26/2011 14:18:01 | 24.176 |
| 9/30/2011 07:16:01 | 22.866 | 9/26/2011 14:48:01 | 24.238 |
| 9/30/2011 07:46:01 | 24.929 | 9/26/2011 15:18:01 | 24.238 |
| 9/30/2011 08:16:01 | 26.554 | 9/26/2011 15:48:01 | 24.301 |
| 9/30/2011 08:46:01 | 28.116 | 9/26/2011 16:18:01 | 24.301 |
| 9/30/2011 09:16:01 | 28.927 | 9/26/2011 16:48:01 | 24.363 |
| 9/30/2011 09:46:01 | 30.737 | 9/26/2011 17:18:01 | 24.363 |
| 9/30/2011 10:16:01 | 31.424 | 9/26/2011 17:48:01 | 24.426 |
| 9/30/2011 10:46:01 | 32.546 | 9/26/2011 18:18:01 | 24.426 |
| 9/30/2011 11:16:01 | 33.669 | 9/26/2011 18:48:01 | 24.426 |
| 9/30/2011 11:46:01 | 34.167 | 9/26/2011 19:18:01 | 24.426 |
| 9/30/2011 12:16:01 | 34.354 | 9/26/2011 19:48:01 | 24.488 |
| 9/30/2011 12:46:01 | 34.978 | 9/26/2011 20:18:01 | 24.488 |
| 9/30/2011 13:16:01 | 35.414 | 9/26/2011 20:48:01 | 24.488 |
| 9/30/2011 13:46:01 | 35.538 | 9/26/2011 21:18:01 | 24.488 |
| 9/30/2011 14:16:01 | 36.224 | 9/26/2011 21:48:01 | 24.488 |
| 9/30/2011 14:46:01 | 35.788 | 9/26/2011 22:18:01 | 24.488 |
| 9/30/2011 15:16:01 | 37.158 | 9/26/2011 22:48:01 | 24.488 |
| 9/30/2011 15:46:01 | 34.666 | 9/26/2011 23:18:01 | 24.488 |
| 9/30/2011 16:16:01 | 33.606 | 9/26/2011 23:48:01 | 24.488 |
| 9/30/2011 16:46:01 | 32.546 | 9/27/2011 00:18:01 | 24.426 |
| 9/30/2011 17:16:01 | 30.925 | 9/27/2011 00:48:01 | 24.426 |
| 9/30/2011 17:46:01 | 28.803 | 9/27/2011 01:18:01 | 24.426 |
| 9/30/2011 18:16:01 | 26.742 | 9/27/2011 01:48:01 | 24.426 |
| 9/30/2011 18:46:01 | 25.742 | 9/27/2011 02:18:01 | 24.363 |
| 9/30/2011 19:16:01 | 24.929 | 9/27/2011 02:48:01 | 24.363 |
| 9/30/2011 19:46:01 | 24.492 | 9/27/2011 03:18:01 | 24.363 |
| 9/30/2011 20:16:01 | 24.429 | 9/27/2011 03:48:01 | 24.301 |
| 9/30/2011 20:46:01 | 24.117 | 9/27/2011 04:18:01 | 24.301 |
| 9/30/2011 21:16:01 | 22.991 | 9/27/2011 04:48:01 | 24.238 |
| 9/30/2011 21:46:01 | 22.616 | 9/27/2011 05:18:01 | 24.238 |
| 9/30/2011 22:16:01 | 22.553 | 9/27/2011 05:48:01 | 24.176 |
| 9/30/2011 22:46:01 | 22.178 | 9/27/2011 06:18:01 | 24.176 |
| 9/30/2011 23:16:01 | 21.552 | 9/27/2011 06:48:01 | 24.113 |

9/30/2011 23:46:01

20.989 9/27/2011 07:18:01

24.113



































































































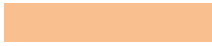

**Tb of tenrec  
eaten by snake**

- 32.5
- 32.5
- 32.5
- 32.0
- 31.0
- 30.0
- 29.0
- 29.5
- 29.5
- 29.5
- 29.0
- 32.0
- 28.0
- 27.0
- 26.5
- 26.5
- 25.5
- 25.5
- 25.5
- 25.5
- 25.5
- 25.5
- 25.0
- 25.0
- 24.5
- 24.5
- 24.5
- 24.5
- 24.5
- 25.0
- 25.5
- 26.0
- 26.5
- 27.0
- 30.0
- 29.0
- 21.0
- 30.0
- 31.5
- 29.5
- 30.0
- 31.0
- 31.0
- 31.0
- 31.0

31.0  
31.0  
31.0  
29.5  
28.0  
30.0  
29.5  
29.0  
29.0  
29.0  
28.5  
28.5  
28.0  
27.5  
27.5  
27.0  
26.5  
26.0  
26.0  
26.0  
26.0  
26.0  
25.5  
25.5  
25.5  
25.5  
25.0  
25.5  
25.5  
25.0  
24.5  
24.5  
25.0  
25.5  
26.0  
26.0  
27.0  
27.0  
27.5  
27.5  
28.0  
28.0  
28.0  
28.5  
28.5  
28.5  
29.0  
29.0  
29.0  
29.0

29.0  
28.5  
28.5  
28.5  
28.0  
28.0  
28.0  
27.5  
27.5  
27.0  
27.0  
27.0  
26.5  
26.5  
26.5  
26.5  
26.0  
26.0  
26.0  
26.0  
25.5  
25.5  
25.0  
25.0  
25.5  
25.5  
25.5  
25.5  
26.0  
26.0  
26.5  
26.5  
26.5  
27.0  
27.5  
27.5  
27.5  
28.0  
28.5  
28.5  
29.0  
29.0  
29.5  
29.5  
29.5  
29.5  
29.5  
29.0  
29.0  
29.0  
28.5  
28.5

28.5  
28.0  
28.0  
28.0  
28.0  
27.5  
27.5  
27.5  
27.5  
27.0  
27.0  
27.0  
27.0  
27.0  
27.0  
27.0  
26.5  
26.5  
26.5  
27.0  
27.0  
27.0  
27.5  
27.5  
27.5  
27.5  
28.0  
28.0  
28.0  
28.0  
28.5  
28.5  
28.5  
28.5  
28.5  
28.5  
28.5  
28.5  
28.5  
28.5  
28.0  
28.0  
28.0  
27.5  
27.5  
27.0  
27.0  
27.0  
27.0  
27.0



34.0  
34.0  
34.0  
34.0  
34.0  
34.0  
33.5  
33.5  
33.5  
33.5  
33.0  
33.0  
33.0  
33.0  
33.0  
33.0  
32.5  
32.5  
32.5  
32.5  
32.5  
32.5  
32.5  
33.0  
33.0  
33.0  
33.0  
32.5  
32.5  
33.0  
33.0  
33.5  
33.5  
33.5  
33.5  
34.5  
34.5  
34.5  
34.5  
34.0  
34.0  
34.0  
34.5  
34.5  
34.0  
34.0  
34.0  
34.0  
33.5  
33.5



33.5  
33.5  
33.5  
33.5  
33.5  
33.5  
33.5  
33.0  
33.0  
34.0  
33.5  
33.5  
33.0  
33.5  
33.5  
33.5  
33.0  
33.0  
33.0  
33.0  
33.0  
33.0  
33.0  
33.0  
34.0  
34.0  
34.0  
34.0  
34.5  
34.5  
34.0  
34.0  
34.0  
34.0  
34.5  
34.5  
34.0  
34.0  
34.0  
34.0  
34.5  
34.5  
34.5  
34.0  
34.0  
33.5  
33.0  
33.0  
32.5

33.0  
32.5  
33.0  
32.5  
33.0  
33.0  
33.0  
33.0  
33.0  
32.5  
32.5  
32.5  
32.5  
32.5  
32.5  
32.5  
33.5  
33.5  
34.0  
34.0  
34.0  
34.0  
34.0  
33.5  
33.5  
34.0  
34.5  
35.5  
35.5  
35.5  
35.5  
35.5  
35.5  
35.5  
35.5  
35.5  
35.5  
35.5  
35.0  
35.0  
34.5  
34.0  
34.0  
33.5  
33.5  
33.0  
33.0  
33.5  
33.5  
34.0

33.5  
33.0  
33.0  
32.5  
32.5  
32.0  
32.0  
32.0  
32.0  
32.5  
33.0  
33.0  
32.5  
33.0  
32.5  
32.5  
32.0  
32.0  
32.0  
33.0  
34.0  
35.0  
35.0  
35.0  
35.0  
35.5  
32.5  
29.0  
28.5  
28.0  
28.0  
28.0  
27.5  
27.0  
27.0  
27.0  
27.0  
27.0  
27.0  
27.0  
27.0  
27.0  
27.5  
27.5  
27.5  
27.5  
27.5  
27.5  
28.0  
28.0  
28.0  
28.0

28.5  
28.5  
28.5  
29.0  
29.0  
29.0  
29.0  
29.0  
29.0  
29.0  
29.0  
29.0  
29.0  
29.0  
29.0  
29.0  
29.0  
28.5  
28.5  
28.5  
28.5  
28.5  
28.5  
28.0  
28.0  
28.0  
28.0  
28.0  
28.0  
27.5  
27.5  
27.5  
27.5  
27.5  
27.5  
27.5  
27.5  
27.5  
27.5  
28.0  
28.0  
28.0  
28.0  
28.5  
28.5  
29.0  
29.0  
29.5  
29.5  
30.0  
30.0

30.0  
30.0  
30.0  
30.0  
30.0  
30.0  
30.0  
29.5  
29.5  
29.5  
29.0  
29.0  
29.0  
28.5  
28.5  
28.5  
28.5  
28.5  
28.5  
28.5  
28.0  
28.0  
28.0  
28.0  
28.0  
28.0  
28.0  
27.5  
27.5  
27.5  
27.5  
27.5  
28.0  
28.0  
29.0  
28.0  
34.0  
33.0
